# Supplementary material
Source: PubMed Central journal article supplement (PMC4256494)
Supplement: supp_M114.040121_mcp.M114.040121-11.pdf [file supp_M114.040121_mcp.M114.040121-11.pdf]

## Peptide View

MS/MS Fragmentation of **GNFNYIEFTR**

Found in **IPI00033494**, Tax\_Id=9606 Gene\_Symbol=MYL12B Myosin regulatory light chain 12B

**Experiment:** 49 - PyB-1 **Fraction:** PyB-1

Match to Query 6033: 1259.593648 from(630.804100,2+)

Title: OECHL100310\_13.15722.15722.2.dta

Data file \\BOROMIR\Masse\Data LTQ-Orbitrap\Chrystelle Lacroix\Etude clinique sJPU\OECHL100310\_13.raw

**Monoisotopic mass of neutral peptide Mr(calc):** 1259.593475 **Fixed modifications:** Carbamidomethyl (C) (apply to specified residues or termini only) **Ions**

**Score:** 53 **Expect:** 0.00059 **Matches :** 10/92 fragment ions using 11 most intense peaks ([help](#))

| #  | b                 | b <sup>++</sup> | b*                | b <sup>*++</sup> | b <sup>0</sup> | b <sup>0++</sup> | Seq. | y                  | y <sup>++</sup>   | y*          | y <sup>*++</sup> | y <sup>0</sup> | y <sup>0++</sup> |
|----|-------------------|-----------------|-------------------|------------------|----------------|------------------|------|--------------------|-------------------|-------------|------------------|----------------|------------------|
| 1  | 58.028740         | 29.518008       |                   |                  |                |                  | G    |                    |                   |             |                  |                |                  |
| 2  | 172.071667        | 86.539471       | 155.045118        | 78.026197        |                |                  | N    | 1203.579299        | 602.293288        | 1186.552750 | 593.780013       | 1185.568734    | 593.2880         |
| 3  | <b>319.140081</b> | 160.073678      | 302.113532        | 151.560404       |                |                  | F    | <b>1089.536372</b> | 545.271824        | 1072.509823 | 536.758549       | 1071.525807    | 536.2665         |
| 4  | 433.183008        | 217.095142      | 416.156459        | 208.581867       |                |                  | N    | <b>942.467958</b>  | 471.737617        | 925.441409  | 463.224342       | 924.457393     | 462.7323         |
| 5  | 596.246337        | 298.626807      | 579.219788        | 290.113532       |                |                  | Y    | <b>828.425031</b>  | 414.716154        | 811.398482  | 406.202879       | 810.414466     | 405.7108         |
| 6  | 709.330401        | 355.168839      | <b>692.303852</b> | 346.655564       |                |                  | I    | 665.361702         | 333.184489        | 648.335153  | 324.671214       | 647.351137     | 324.1792         |
| 7  | 838.372994        | 419.690135      | 821.346445        | 411.176861       | 820.362429     | 410.684853       | E    | <b>552.277638</b>  | <b>276.642457</b> | 535.251089  | 268.129182       | 534.267073     | 267.6371         |
| 8  | <b>985.441408</b> | 493.224342      | 968.414859        | 484.711068       | 967.430843     | 484.219060       | F    | <b>423.235045</b>  | 212.121160        | 406.208496  | 203.607886       | 405.224480     | 203.1158         |
| 9  | 1086.489087       | 543.748181      | 1069.462538       | 535.234907       | 1068.478522    | 534.742899       | T    | <b>276.166631</b>  | 138.586953        | 259.140082  | 130.073679       | 258.156066     | 129.5816         |
| 10 |                   |                 |                   |                  |                |                  | R    | 175.118952         | 88.063114         | 158.092403  | 79.549839        |                |                  |

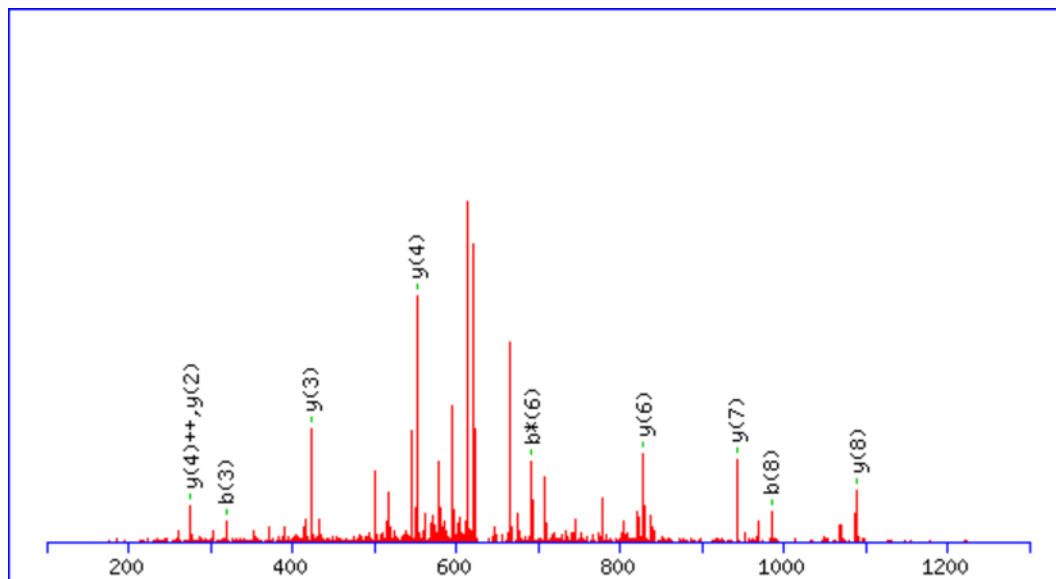

## Peptide View

MS/MS Fragmentation of **YSGSEGSTQTLTKGELK**

Found in **IPI00017526**, Tax\_Id=9606 Gene\_Symbol=S100P Protein S100-P

**Experiment:** 49 - PyB-1 **Fraction:** PyB-1

Match to Query 11652: 1784.879648 from(893.447100,2+)

Title: OECHL100310\_13.7733.7733.2.dta

Data file \\BOROMIR\Masse\Data LTQ-Orbitrap\Chrystelle Lacroix\Etude clinique sJPU\OECHL100310\_13.raw

**Monoisotopic mass of neutral peptide Mr(calc):** 1784.879211 **Fixed modifications:** Carbamidomethyl (C) (apply to specified residues or termini only) **Ions**

**Score:** 60 **Expect:** 0.00014 **Matches :** 33/170 fragment ions using 89 most intense peaks ([help](#))

| # | b                 | b <sup>++</sup> | b* | b <sup>*++</sup> | b <sup>0</sup>    | b <sup>0++</sup> | Seq. | y                  | y <sup>++</sup>   | y*                 | y <sup>*++</sup> | y <sup>0</sup>     | y <sup>0++</sup> |
|---|-------------------|-----------------|----|------------------|-------------------|------------------|------|--------------------|-------------------|--------------------|------------------|--------------------|------------------|
| 1 | 164.070605        | 82.538940       |    |                  |                   |                  | Y    |                    |                   |                    |                  |                    |                  |
| 2 | 251.102633        | 126.054954      |    |                  | 233.092068        | 117.049672       | S    | <b>1622.823172</b> | 811.915224        | 1605.796623        | 803.401950       | 1604.812607        | 802.9099         |
| 3 | 308.124097        | 154.565687      |    |                  | 290.113532        | 145.560404       | G    | <b>1535.791144</b> | <b>768.399210</b> | 1518.764595        | 759.885936       | 1517.780579        | 759.3939         |
| 4 | 395.156125        | 198.081701      |    |                  | <b>377.145560</b> | 189.076418       | S    | 1478.769680        | 739.888478        | <b>1461.743131</b> | 731.375204       | 1460.759115        | 730.8831         |
| 5 | <b>524.198718</b> | 262.602997      |    |                  | 506.188153        | 253.597715       | E    | <b>1391.737652</b> | 696.372464        | <b>1374.711103</b> | 687.859190       | <b>1373.727087</b> | 687.3671         |

|    |                    |            |                    |            |                    |                   |   |                    |                   |                    |            |                    |                 |
|----|--------------------|------------|--------------------|------------|--------------------|-------------------|---|--------------------|-------------------|--------------------|------------|--------------------|-----------------|
| 6  | 581.220182         | 291.113729 |                    |            | 563.209617         | 282.108447        | G | <b>1262.695059</b> | <b>631.851167</b> | 1245.668510        | 623.337893 | <b>1244.684494</b> | <b>622.8458</b> |
| 7  | 668.252210         | 334.629743 |                    |            | <b>650.241645</b>  | <b>325.624461</b> | S | <b>1205.673595</b> | 603.340436        | 1188.647046        | 594.827161 | 1187.663030        | 594.3351        |
| 8  | 769.299889         | 385.153583 |                    |            | 751.289324         | 376.148300        | T | <b>1118.641567</b> | 559.824421        | 1101.615018        | 551.311147 | 1100.631002        | 550.8191        |
| 9  | 897.358467         | 449.182872 | 880.331918         | 440.669597 | 879.347902         | 440.177589        | Q | <b>1017.593888</b> | 509.300582        | <b>1000.567339</b> | 500.787307 | 999.583323         | 500.2952        |
| 10 | 998.406146         | 499.706711 | 981.379597         | 491.193437 | 980.395581         | 490.701429        | T | 889.535310         | 445.271293        | 872.508761         | 436.758018 | 871.524745         | 436.2660        |
| 11 | 1111.490210        | 556.248743 | <b>1094.463661</b> | 547.735469 | <b>1093.479645</b> | 547.243461        | L | <b>788.487631</b>  | 394.747453        | 771.461082         | 386.234179 | 770.477066         | 385.7421        |
| 12 | <b>1212.537889</b> | 606.772583 | 1195.511340        | 598.259308 | 1194.527324        | 597.767300        | T | <b>675.403567</b>  | 338.205421        | 658.377018         | 329.692147 | 657.393002         | 329.2001        |
| 13 | <b>1340.632852</b> | 670.820064 | 1323.606303        | 662.306790 | 1322.622287        | 661.814782        | K | <b>574.355888</b>  | 287.681582        | 557.329339         | 279.168307 | 556.345323         | 278.6762        |
| 14 | <b>1397.654316</b> | 699.330796 | 1380.627767        | 690.817522 | 1379.643751        | 690.325514        | G | <b>446.260925</b>  | 223.634100        | 429.234376         | 215.120826 | 428.250360         | 214.6288        |
| 15 | <b>1526.696909</b> | 763.852093 | 1509.670360        | 755.338818 | 1508.686344        | 754.846810        | E | <b>389.239461</b>  | 195.123368        | 372.212912         | 186.610094 | 371.228896         | 186.1180        |
| 16 | <b>1639.780973</b> | 820.394124 | <b>1622.754424</b> | 811.880850 | 1621.770408        | 811.388842        | L | <b>260.196868</b>  | 130.602072        | 243.170319         | 122.088797 |                    |                 |
| 17 |                    |            |                    |            |                    |                   | K | 147.112804         | 74.060040         | 130.086255         | 65.546765  |                    |                 |

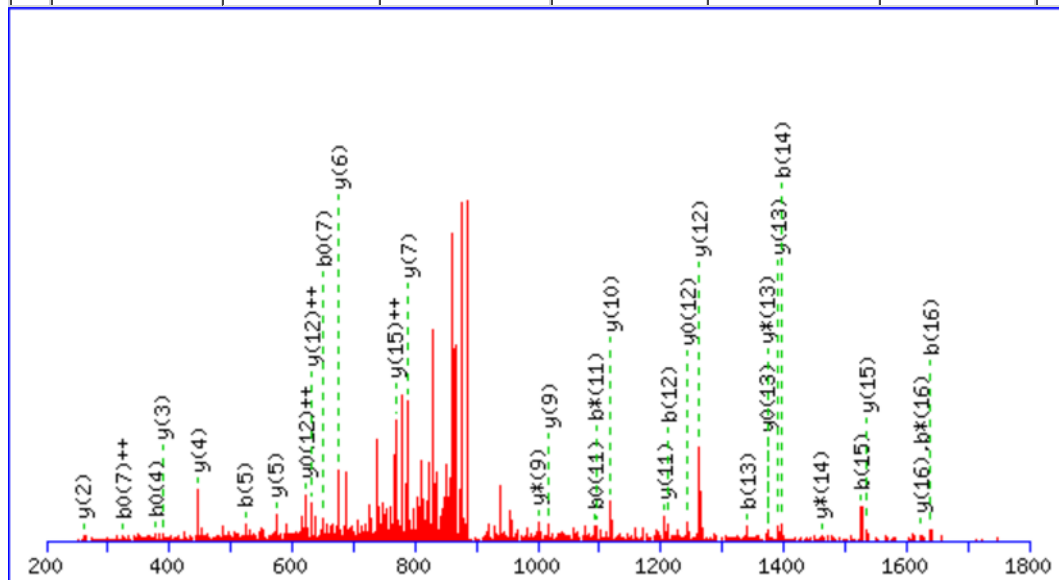

## Peptide View

MS/MS Fragmentation of **SRCPDGSTCCELPSGK**

Found in **IPI00182138**, Tax\_Id=9606 Gene\_Symbol=GRN Isoform 2 of Granulins

**Experiment:** 49 - PyB-1 **Fraction:** PyB-1

Match to Query 11860: 1809.746448 from(905.880500,2+)

Title: OECHL100310\_13.4915.4915.2.dta

Data file \\BOROMIR\Masse\Data LTQ-Orbitrap\Chrystelle Lacroix\Etude clinique sJPU\OECHL100310\_13.raw

**Monoisotopic mass of neutral peptide Mr(calc):** 1809.744415 **Fixed modifications:** Carbamidomethyl (C) (apply to specified residues or termini only) **Ions**

**Score:** 70 **Expect:** 3e-006 **Matches :** 37/174 fragment ions using 60 most intense peaks ([help](#))

| #  | b                  | b <sup>++</sup>   | b*                 | b <sup>*++</sup>  | b <sup>0</sup>    | b <sup>0++</sup>  | Seq. | y                  | y <sup>++</sup>   | y*                 | y <sup>*++</sup>  | y <sup>0</sup>    | y <sup>0++</sup> |
|----|--------------------|-------------------|--------------------|-------------------|-------------------|-------------------|------|--------------------|-------------------|--------------------|-------------------|-------------------|------------------|
| 1  | 88.039304          | 44.523290         |                    |                   | 70.028739         | 35.518008         | S    |                    |                   |                    |                   |                   |                  |
| 2  | 244.140415         | 122.573845        | 227.113866         | 114.060571        | 226.129850        | 113.568563        | R    | 1723.719653        | 862.363465        | 1706.693104        | 853.850190        | 1705.709088       | 853.3581         |
| 3  | 404.171064         | 202.589170        | 387.144515         | 194.075896        | 386.160499        | 193.583888        | C    | <b>1567.618542</b> | 784.312909        | 1550.591993        | 775.799635        | 1549.607977       | 775.3076         |
| 4  | <b>501.223828</b>  | 251.115552        | 484.197279         | 242.602277        | <b>483.213263</b> | 242.110269        | P    | <b>1407.587893</b> | 704.297585        | 1390.561344        | 695.784310        | 1389.577328       | 695.2923         |
| 5  | <b>616.250771</b>  | 308.629024        | 599.224222         | 300.115749        | 598.240206        | 299.623741        | D    | <b>1310.535129</b> | <b>655.771203</b> | <b>1293.508580</b> | <b>647.257928</b> | 1292.524564       | 646.7659         |
| 6  | 673.272235         | 337.139756        | <b>656.245686</b>  | 328.626481        | 655.261670        | 328.134473        | G    | <b>1195.508186</b> | 598.257731        | 1178.481637        | 589.744457        | 1177.497621       | 589.2524         |
| 7  | <b>760.304263</b>  | 380.655770        | 743.277714         | 372.142495        | <b>742.293698</b> | 371.650487        | S    | <b>1138.486722</b> | 569.746999        | 1121.460173        | 561.233725        | 1120.476157       | 560.7417         |
| 8  | <b>861.351942</b>  | 431.179609        | 844.325393         | 422.666335        | 843.341377        | 422.174327        | T    | <b>1051.454694</b> | 526.230985        | 1034.428145        | 517.717711        | 1033.444129       | 517.2257         |
| 9  | <b>1021.382591</b> | 511.194934        | 1004.356042        | <b>502.681659</b> | 1003.372026       | <b>502.189651</b> | C    | 950.407015         | 475.707146        | 933.380466         | 467.193871        | 932.396450        | 466.7018         |
| 10 | <b>1181.413240</b> | 591.210258        | 1164.386691        | 582.696984        | 1163.402675       | 582.204976        | C    | <b>790.376366</b>  | 395.691821        | 773.349817         | 387.178547        | 772.365801        | 386.6865         |
| 11 | <b>1310.455833</b> | <b>655.731555</b> | <b>1293.429284</b> | <b>647.218280</b> | 1292.445268       | 646.726272        | E    | 630.345717         | 315.676497        | 613.319168         | 307.163222        | 612.335152        | 306.6712         |
| 12 | <b>1423.539897</b> | <b>712.273587</b> | 1406.513348        | 703.760312        | 1405.529332       | 703.268304        | L    | <b>501.303124</b>  | 251.155200        | 484.276575         | 242.641925        | <b>483.292559</b> | 242.1499         |
| 13 | <b>1520.592661</b> | <b>760.799969</b> | 1503.566112        | 752.286694        | 1502.582096       | 751.794686        | P    | <b>388.219060</b>  | 194.613168        | 371.192511         | 186.099894        | <b>370.208495</b> | 185.6078         |
| 14 | <b>1607.624689</b> | 804.315983        | 1590.598140        | 795.802708        | 1589.614124       | 795.310700        | S    | <b>291.166296</b>  | 146.086786        | 274.139747         | 137.573512        | 273.155731        | 137.0815         |
| 15 | <b>1664.646153</b> | <b>832.826715</b> | 1647.619604        | 824.313440        | 1646.635588       | 823.821432        | G    | 204.134268         | 102.570772        | 187.107719         | 94.057497         |                   |                  |
| 16 |                    |                   |                    |                   |                   |                   | K    | 147.112804         | 74.060040         | 130.086255         | 65.546765         |                   |                  |

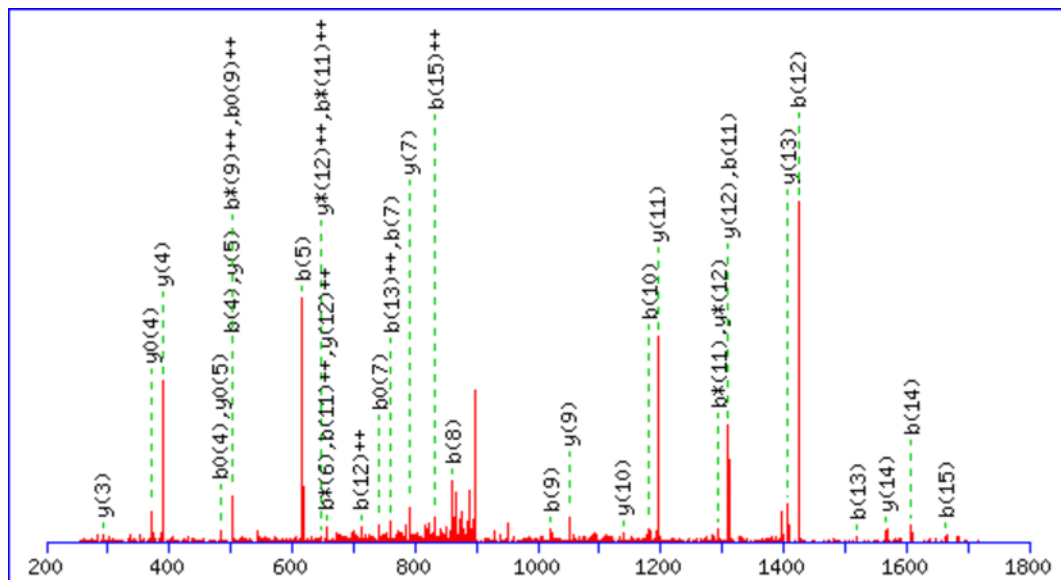

## Peptide View

MS/MS Fragmentation of **AADDTWEPFASGK**

Found in **IPI00022432**, Tax\_Id=9606 Gene\_Symbol=TTR Transthyretin

**Experiment:** 49 - PyB-1 **Fraction:** PyB-1

Match to Query 7500: 1393.614848 from(697.814700,2+)

Title: OECHL100310\_13.14428.14428.2.dta

Data file \\BOROMIR\Masse\Data LTQ-Orbitrap\Chrystelle Lacroix\Etude clinique sJPU\OECHL100310\_13.raw

**Monoisotopic mass of neutral peptide Mr(calc):** 1393.615005 **Fixed modifications:** Carbamidomethyl (C) (apply to specified residues or termini only) **Ions**

**Score:** 70 **Expect:** 6.1e-006 **Matches :** 20/112 fragment ions using 36 most intense peaks ([help](#))

| # | b                 | b <sup>++</sup> | b <sup>0</sup>    | b <sup>0++</sup> | Seq. | y                  | y <sup>++</sup> | y <sup>*</sup> | y <sup>*++</sup> | y <sup>0</sup> | y <sup>0++</sup> | #  |
|---|-------------------|-----------------|-------------------|------------------|------|--------------------|-----------------|----------------|------------------|----------------|------------------|----|
| 1 | 72.044390         | 36.525833       |                   |                  | A    |                    |                 |                |                  |                |                  | 13 |
| 2 | 143.081504        | 72.044390       |                   |                  | A    | <b>1323.585173</b> | 662.296225      | 1306.558624    | 653.782950       | 1305.574608    | 653.290942       | 12 |
| 3 | <b>258.108447</b> | 129.557862      | 240.097882        | 120.552579       | D    | <b>1252.548059</b> | 626.777668      | 1235.521510    | 618.264393       | 1234.537494    | 617.772385       | 11 |
| 4 | <b>373.135390</b> | 187.071333      | 355.124825        | 178.066051       | D    | 1137.521116        | 569.264196      | 1120.494567    | 560.750922       | 1119.510551    | 560.258914       | 10 |
| 5 | <b>474.183069</b> | 237.595173      | <b>456.172504</b> | 228.589890       | T    | <b>1022.494173</b> | 511.750725      | 1005.467624    | 503.237450       | 1004.483608    | 502.745442       | 9  |

|    |                    |            |             |            |   |                   |            |            |            |                   |            |   |
|----|--------------------|------------|-------------|------------|---|-------------------|------------|------------|------------|-------------------|------------|---|
| 6  | <b>660.262382</b>  | 330.634829 | 642.251817  | 321.629547 | W | <b>921.446494</b> | 461.226885 | 904.419945 | 452.713611 | 903.435929        | 452.221603 | 8 |
| 7  | <b>789.304975</b>  | 395.156126 | 771.294410  | 386.150843 | E | <b>735.367181</b> | 368.187229 | 718.340632 | 359.673954 | 717.356616        | 359.181946 | 7 |
| 8  | 886.357739         | 443.682508 | 868.347174  | 434.677225 | P | <b>606.324588</b> | 303.665932 | 589.298039 | 295.152658 | <b>588.314023</b> | 294.660650 | 6 |
| 9  | <b>1033.426153</b> | 517.216715 | 1015.415588 | 508.211432 | F | 509.271824        | 255.139550 | 492.245275 | 246.626275 | 491.261259        | 246.134267 | 5 |
| 10 | <b>1104.463267</b> | 552.735272 | 1086.452702 | 543.729989 | A | <b>362.203410</b> | 181.605343 | 345.176861 | 173.092068 | 344.192845        | 172.600060 | 4 |
| 11 | <b>1191.495295</b> | 596.251286 | 1173.484730 | 587.246003 | S | <b>291.166296</b> | 146.086786 | 274.139747 | 137.573512 | 273.155731        | 137.081504 | 3 |
| 12 | <b>1248.516759</b> | 624.762018 | 1230.506194 | 615.756735 | G | <b>204.134268</b> | 102.570772 | 187.107719 | 94.057497  |                   |            | 2 |
| 13 |                    |            |             |            | K | 147.112804        | 74.060040  | 130.086255 | 65.546765  |                   |            | 1 |

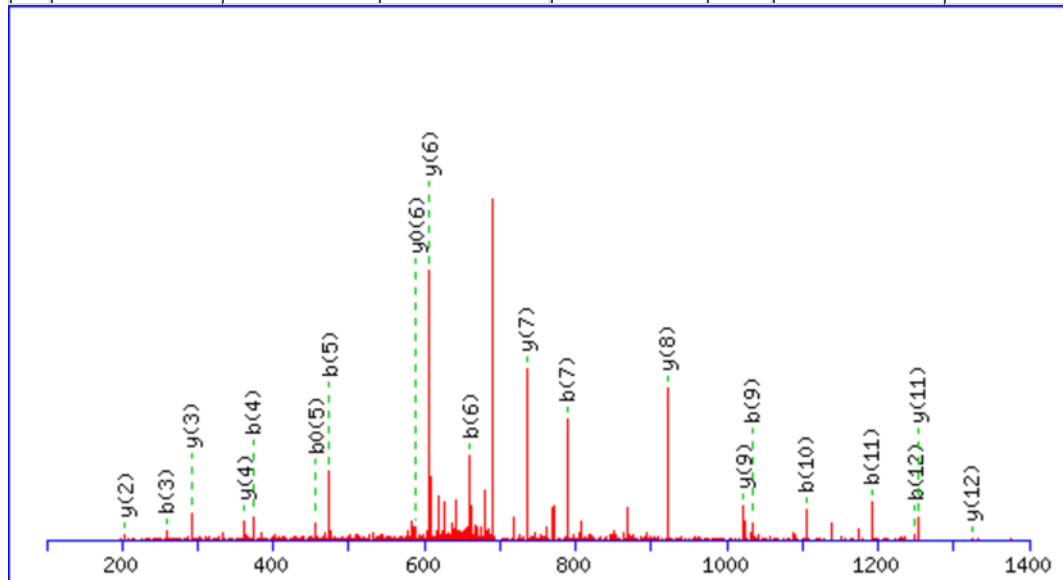

## Peptide View

MS/MS Fragmentation of **ASFENNCEIGCFAK**

Found in **IPI00010105**, Tax\_Id=9606 Gene\_Symbol=EIF6 Eukaryotic translation initiation factor 6

**Experiment:** 49 - PyB-1 **Fraction:** PyB-1

Match to Query 10343: 1645.687048 from(823.850800,2+)

Title: OECHL100310\_13.12993.12993.2.dta

Data file \\BOROMIR\Masse\Data LTQ-Orbitrap\Chrystelle Lacroix\Etude clinique sJPU\OECHL100310\_13.raw

**Monoisotopic mass of neutral peptide Mr(calc):** 1645.686462**Fixed modifications:** Carbamidomethyl (C) (apply to specified residues or termini only)**Ions****Score:** 56 **Expect:** 7.7e-005**Matches :** 12/134 fragment ions using 14 most intense peaks ([help](#))

| #  | b           | b <sup>++</sup> | b*          | b <sup>*++</sup> | b <sup>0</sup> | b <sup>0++</sup> | Seq. | y           | y <sup>++</sup> | y*          | y <sup>*++</sup> | y <sup>0</sup> | y <sup>0++</sup> |
|----|-------------|-----------------|-------------|------------------|----------------|------------------|------|-------------|-----------------|-------------|------------------|----------------|------------------|
| 1  | 72.044390   | 36.525833       |             |                  |                |                  | A    |             |                 |             |                  |                |                  |
| 2  | 159.076418  | 80.041847       |             |                  | 141.065853     | 71.036564        | S    | 1575.656640 | 788.331958      | 1558.630091 | 779.818684       | 1557.646075    | 779.3266         |
| 3  | 306.144832  | 153.576054      |             |                  | 288.134267     | 144.570772       | F    | 1488.624612 | 744.815944      | 1471.598063 | 736.302670       | 1470.614047    | 735.8106         |
| 4  | 435.187425  | 218.097351      |             |                  | 417.176860     | 209.092068       | E    | 1341.556198 | 671.281737      | 1324.529649 | 662.768463       | 1323.545633    | 662.2764         |
| 5  | 549.230352  | 275.118814      | 532.203803  | 266.605540       | 531.219787     | 266.113532       | N    | 1212.513605 | 606.760441      | 1195.487056 | 598.247166       | 1194.503040    | 597.7551         |
| 6  | 663.273279  | 332.140278      | 646.246730  | 323.627003       | 645.262714     | 323.134995       | N    | 1098.470678 | 549.738977      | 1081.444129 | 541.225703       | 1080.460113    | 540.7336         |
| 7  | 823.303928  | 412.155602      | 806.277379  | 403.642328       | 805.293363     | 403.150320       | C    | 984.427751  | 492.717514      | 967.401202  | 484.204239       | 966.417186     | 483.7122         |
| 8  | 952.346521  | 476.676899      | 935.319972  | 468.163624       | 934.335956     | 467.671616       | E    | 824.397102  | 412.702189      | 807.370553  | 404.188915       | 806.386537     | 403.6969         |
| 9  | 1065.430585 | 533.218931      | 1048.404036 | 524.705656       | 1047.420020    | 524.213648       | I    | 695.354509  | 348.180893      | 678.327960  | 339.667618       |                |                  |
| 10 | 1122.452049 | 561.729663      | 1105.425500 | 553.216388       | 1104.441484    | 552.724380       | G    | 582.270445  | 291.638861      | 565.243896  | 283.125586       |                |                  |
| 11 | 1282.482698 | 641.744987      | 1265.456149 | 633.231713       | 1264.472133    | 632.739705       | C    | 525.248981  | 263.128129      | 508.222432  | 254.614854       |                |                  |
| 12 | 1429.551112 | 715.279194      | 1412.524563 | 706.765920       | 1411.540547    | 706.273912       | F    | 365.218332  | 183.112804      | 348.191783  | 174.599530       |                |                  |
| 13 | 1500.588226 | 750.797751      | 1483.561677 | 742.284477       | 1482.577661    | 741.792469       | A    | 218.149918  | 109.578597      | 201.123369  | 101.065322       |                |                  |
| 14 |             |                 |             |                  |                |                  | K    | 147.112804  | 74.060040       | 130.086255  | 65.546765        |                |                  |

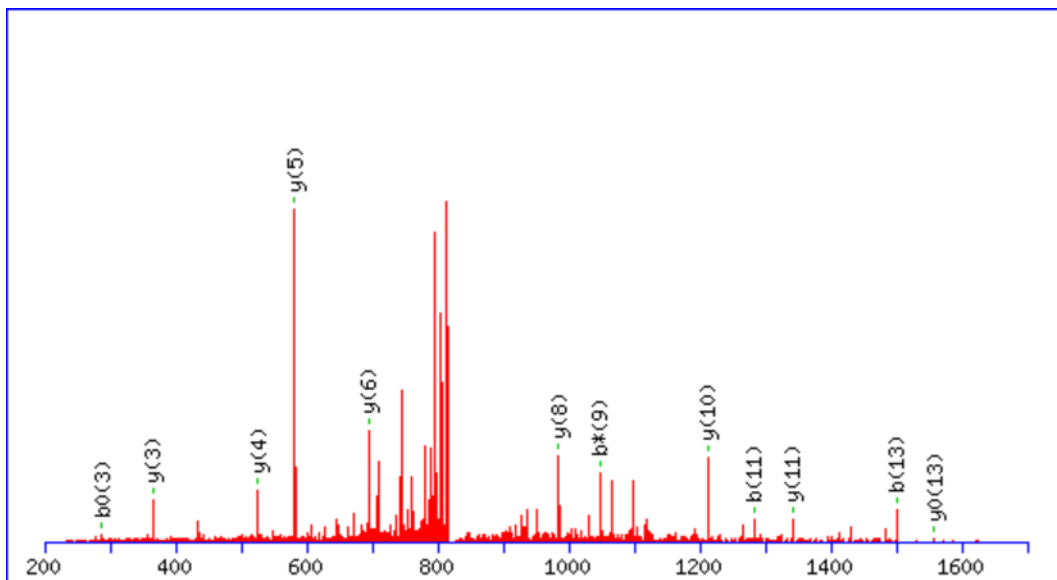

## Peptide View

MS/MS Fragmentation of **TVAGPVGGSLSVQCPYEKEHR**

Found in **IPI00414784**, Tax\_Id=9606 Gene\_Symbol=CD300A Isoform 1 of CMRF35-like molecule 8

**Experiment:** 49 - PyB-1 **Fraction:** PyB-1

Match to Query 14381: 2270.109448 from(1136.062000,2+)

Title: OECHL100310\_13.10018.10018.2.dta

Data file \\BOROMIR\Masse\Data LTQ-Orbitrap\Chrystelle Lacroix\Etude clinique sJPU\OECHL100310\_13.raw

**Monoisotopic mass of neutral peptide Mr(calc):** 2270.111374**Fixed modifications:** Carbamidomethyl (C) (apply to specified residues or termini only)**Ions**

**Score:** 95 **Expect:** 6.4e-008**Matches :** 31/212 fragment ions using 51 most intense peaks ([help](#))

| # | b          | b <sup>++</sup> | b* | b <sup>*++</sup> | b <sup>0</sup>    | b <sup>0++</sup> | Seq.     | y                  | y <sup>++</sup>    | y*          | y <sup>*++</sup> | y <sup>0</sup> |    |
|---|------------|-----------------|----|------------------|-------------------|------------------|----------|--------------------|--------------------|-------------|------------------|----------------|----|
| 1 | 102.054955 | 51.531116       |    |                  | 84.044390         | 42.525833        | <b>T</b> |                    |                    |             |                  |                |    |
| 2 | 201.123369 | 101.065322      |    |                  | 183.112804        | 92.060040        | <b>V</b> | 2170.070965        | 1085.539120        | 2153.044416 | 1077.025846      | 2152.060400    | 10 |
| 3 | 272.160483 | 136.583879      |    |                  | 254.149918        | 127.578597       | <b>A</b> | 2071.002551        | <b>1036.004913</b> | 2053.976002 | 1027.491639      | 2052.991986    | 10 |
| 4 | 329.181947 | 165.094611      |    |                  | 311.171382        | 156.089329       | <b>G</b> | 1999.965437        | <b>1000.486357</b> | 1982.938888 | 991.973082       | 1981.954872    | 9  |
| 5 | 426.234711 | 213.620994      |    |                  | <b>408.224146</b> | 204.615711       | <b>P</b> | <b>1942.943973</b> | <b>971.975625</b>  | 1925.917424 | 963.462350       | 1924.933408    | 9  |



|    |                    |             |                    |                   |                   |             |   |                    |                   |                    |                   |                    |   |
|----|--------------------|-------------|--------------------|-------------------|-------------------|-------------|---|--------------------|-------------------|--------------------|-------------------|--------------------|---|
| 6  | 525.303125         | 263.155201  |                    |                   | 507.292560        | 254.149918  | V | <b>1845.891209</b> | 923.449243        | 1828.864660        | 914.935968        | 1827.880644        | 9 |
| 7  | 582.324589         | 291.665933  |                    |                   | <b>564.314024</b> | 282.660650  | G | <b>1746.822795</b> | <b>873.915036</b> | 1729.796246        | 865.401761        | 1728.812230        | 8 |
| 8  | 639.346053         | 320.176665  |                    |                   | 621.335488        | 311.171382  | G | <b>1689.801331</b> | <b>845.404304</b> | 1672.774782        | 836.891029        | 1671.790766        | 8 |
| 9  | 726.378081         | 363.692679  |                    |                   | <b>708.367516</b> | 354.687396  | S | <b>1632.779867</b> | 816.893572        | 1615.753318        | 808.380297        | <b>1614.769302</b> | 8 |
| 10 | 839.462145         | 420.234711  |                    |                   | 821.451580        | 411.229428  | L | <b>1545.747839</b> | 773.377558        | 1528.721290        | 764.864283        | 1527.737274        | 7 |
| 11 | 926.494173         | 463.750725  |                    |                   | 908.483608        | 454.745442  | S | <b>1432.663775</b> | 716.835526        | <b>1415.637226</b> | <b>708.322251</b> | 1414.653210        | 7 |
| 12 | 1025.562587        | 513.284932  |                    |                   | 1007.552022       | 504.279649  | V | <b>1345.631747</b> | 673.319512        | 1328.605198        | 664.806237        | 1327.621182        | 6 |
| 13 | 1153.621165        | 577.314221  | 1136.594616        | <b>568.800946</b> | 1135.610600       | 568.308938  | Q | <b>1246.563333</b> | 623.785305        | <b>1229.536784</b> | 615.272030        | 1228.552768        | 6 |
| 14 | 1313.651814        | 657.329545  | 1296.625265        | 648.816271        | 1295.641249       | 648.324263  | C | <b>1118.504755</b> | 559.756016        | 1101.478206        | 551.242741        | 1100.494190        | 5 |
| 15 | 1410.704578        | 705.855927  | 1393.678029        | 697.342653        | 1392.694013       | 696.850645  | P | <b>958.474106</b>  | 479.740691        | 941.447557         | 471.227417        | 940.463541         | 4 |
| 16 | 1573.767907        | 787.387592  | 1556.741358        | 778.874317        | 1555.757342       | 778.382309  | Y | <b>861.421342</b>  | 431.214309        | 844.394793         | 422.701035        | 843.410777         | 4 |
| 17 | 1702.810500        | 851.908888  | 1685.783951        | 843.395614        | 1684.799935       | 842.903606  | E | <b>698.358013</b>  | 349.682645        | 681.331464         | 341.169370        | 680.347448         | 3 |
| 18 | 1830.905463        | 915.956370  | 1813.878914        | 907.443095        | 1812.894898       | 906.951087  | K | <b>569.315420</b>  | 285.161348        | 552.288871         | 276.648074        | 551.304855         | 2 |
| 19 | <b>1959.948056</b> | 980.477666  | <b>1942.921507</b> | <b>971.964392</b> | 1941.937491       | 971.472384  | E | <b>441.220457</b>  | 221.113867        | 424.193908         | 212.600592        | 423.209892         | 2 |
| 20 | 2097.006968        | 1049.007122 | 2079.980419        | 1040.493847       | 2078.996403       | 1040.001840 | H | 312.177864         | 156.592570        | 295.151315         | 148.079295        |                    |   |
| 21 |                    |             |                    |                   |                   |             | R | 175.118952         | 88.063114         | 158.092403         | 79.549839         |                    |   |

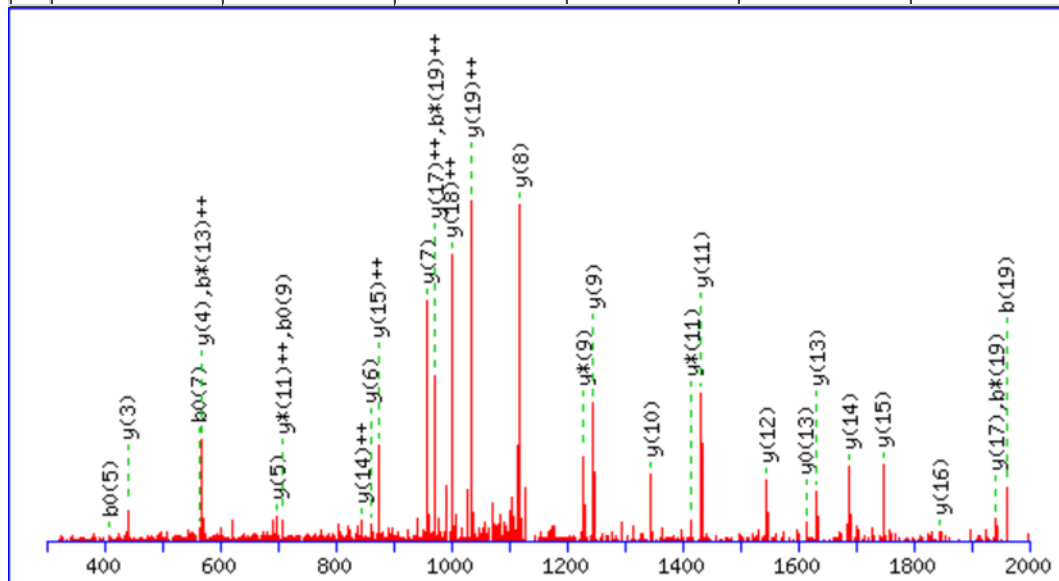

## Peptide View

MS/MS Fragmentation of **AFPALTSLDLSDNPGLGER**

Found in **IPI00029260**, Tax\_Id=9606 Gene\_Symbol=CD14 Monocyte differentiation antigen CD14

**Experiment:** 49 - PyB-1 **Fraction:** PyB-1

Match to Query 12942: 1971.991248 from(987.002900,2+)

Title: OECHL100310\_13.18049.18049.2.dta

Data file \\BOROMIR\Masse\Data LTQ-Orbitrap\Chrystelle Lacroix\Etude clinique sJPU\OECHL100310\_13.raw

**Monoisotopic mass of neutral peptide Mr(calc):** 1971.990158**Fixed modifications:** Carbamidomethyl (C) (apply to specified residues or termini only)**Ions**

**Score:** 104 **Expect:** 5.5e-009**Matches :** 23/180 fragment ions using 33 most intense peaks ([help](#))

| #  | b           | b <sup>++</sup> | b*          | b <sup>*++</sup> | b <sup>0</sup> | b <sup>0++</sup> | Seq. | y           | y <sup>++</sup> | y*          | y <sup>*++</sup> | y <sup>0</sup> | y <sup>0++</sup> |
|----|-------------|-----------------|-------------|------------------|----------------|------------------|------|-------------|-----------------|-------------|------------------|----------------|------------------|
| 1  | 72.044390   | 36.525833       |             |                  |                |                  | A    |             |                 |             |                  |                |                  |
| 2  | 219.112804  | 110.060040      |             |                  |                |                  | F    | 1901.960333 | 951.483805      | 1884.933784 | 942.970530       | 1883.949768    | 942.4785         |
| 3  | 316.165568  | 158.586422      |             |                  |                |                  | P    | 1754.891919 | 877.949597      | 1737.865370 | 869.436323       | 1736.881354    | 868.9443         |
| 4  | 387.202682  | 194.104979      |             |                  |                |                  | A    | 1657.839155 | 829.423215      | 1640.812606 | 820.909941       | 1639.828590    | 820.4179         |
| 5  | 500.286746  | 250.647011      |             |                  |                |                  | L    | 1586.802041 | 793.904659      | 1569.775492 | 785.391384       | 1568.791476    | 784.8993         |
| 6  | 601.334425  | 301.170851      |             |                  | 583.323860     | 292.165568       | T    | 1473.717977 | 737.362627      | 1456.691428 | 728.849352       | 1455.707412    | 728.3573         |
| 7  | 688.366453  | 344.686865      |             |                  | 670.355888     | 335.681582       | S    | 1372.670298 | 686.838787      | 1355.643749 | 678.325513       | 1354.659733    | 677.8335         |
| 8  | 801.450517  | 401.228897      |             |                  | 783.439952     | 392.223614       | L    | 1285.638270 | 643.322773      | 1268.611721 | 634.809499       | 1267.627705    | 634.3174         |
| 9  | 916.477460  | 458.742368      |             |                  | 898.466895     | 449.737085       | D    | 1172.554206 | 586.780741      | 1155.527657 | 578.267467       | 1154.543641    | 577.7754         |
| 10 | 1029.561524 | 515.284400      |             |                  | 1011.550959    | 506.279117       | L    | 1057.527263 | 529.267270      | 1040.500714 | 520.753995       | 1039.516698    | 520.2619         |
| 11 | 1116.593552 | 558.800414      |             |                  | 1098.582987    | 549.795132       | S    | 944.443199  | 472.725238      | 927.416650  | 464.211963       | 926.432634     | 463.7199         |
| 12 | 1231.620495 | 616.313886      |             |                  | 1213.609930    | 607.308603       | D    | 857.411171  | 429.209224      | 840.384622  | 420.695949       | 839.400606     | 420.2039         |
| 13 | 1345.663422 | 673.335349      | 1328.636873 | 664.822075       | 1327.652857    | 664.330067       | N    | 742.384228  | 371.695752      | 725.357679  | 363.182477       | 724.373663     | 362.6904         |
| 14 | 1442.716186 | 721.861731      | 1425.689637 | 713.348457       | 1424.705621    | 712.856449       | P    | 628.341301  | 314.674288      | 611.314752  | 306.161014       | 610.330736     | 305.6690         |
| 15 | 1499.737650 | 750.372463      | 1482.711101 | 741.859189       | 1481.727085    | 741.367181       | G    | 531.288537  | 266.147906      | 514.261988  | 257.634632       | 513.277972     | 257.1426         |
| 16 | 1612.821714 | 806.914495      | 1595.795165 | 798.401221       | 1594.811149    | 797.909212       | L    | 474.267073  | 237.637174      | 457.240524  | 229.123900       | 456.256508     | 228.6318         |
| 17 | 1669.843178 | 835.425227      | 1652.816629 | 826.911952       | 1651.832613    | 826.419944       | G    | 361.183009  | 181.095142      | 344.156460  | 172.581868       | 343.172444     | 172.0898         |
| 18 | 1798.885771 | 899.946524      | 1781.859222 | 891.433249       | 1780.875206    | 890.941241       | E    | 304.161545  | 152.584411      | 287.134996  | 144.071136       | 286.150980     | 143.5791         |

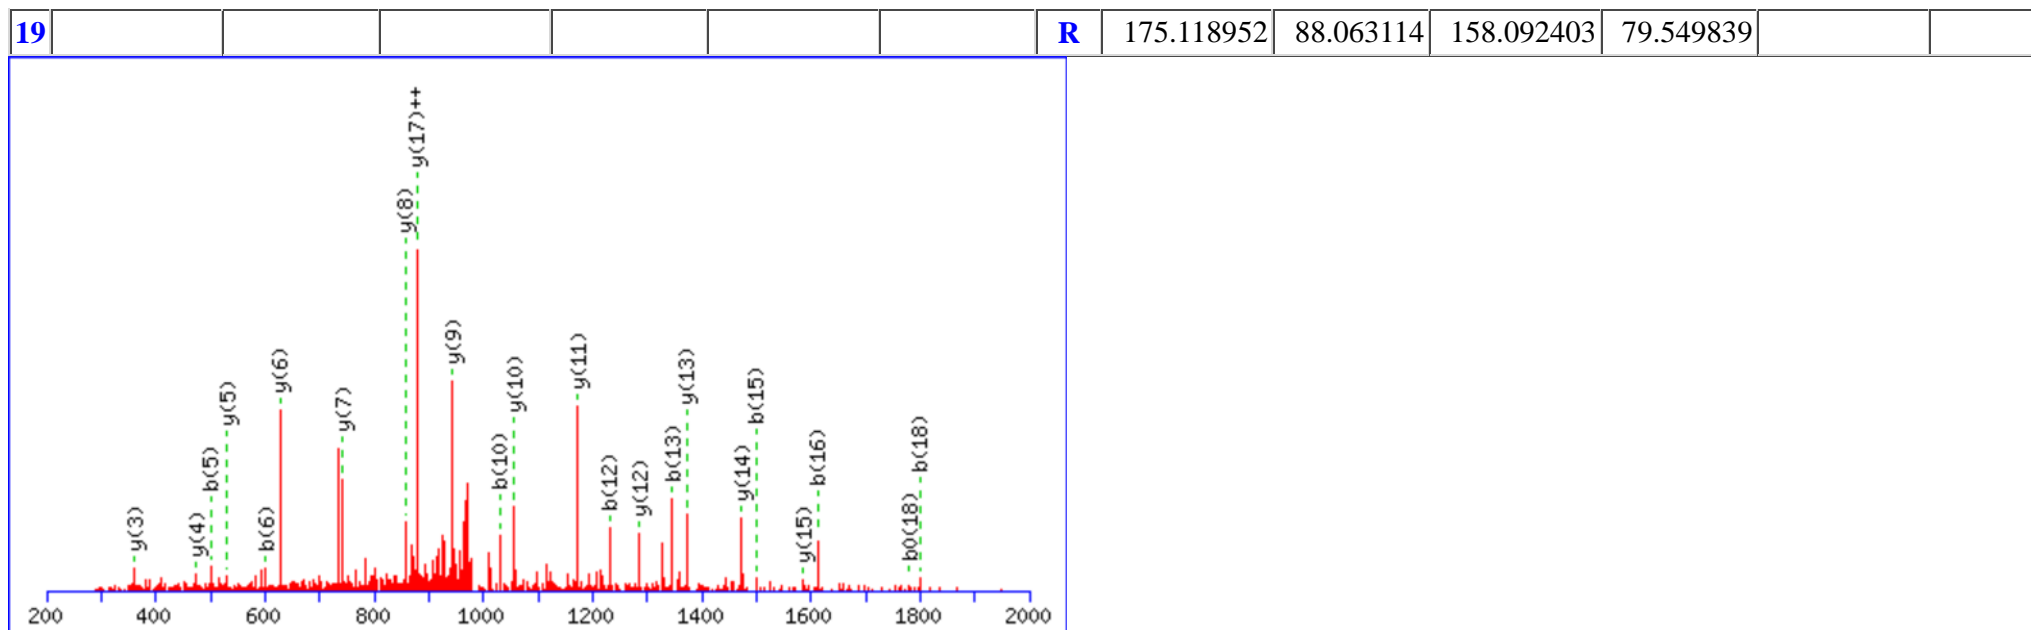

## Peptide View

MS/MS Fragmentation of **NCGYPGISPEECASRK**

Found in **IPI00010675**, Tax\_Id=9606 Gene\_Symbol=TFF2 Trefoil factor 2

**Experiment:** 49 - PyB-1 **Fraction:** PyB-1

Match to Query 11960: 1823.794448 from(912.904500,2+)

Title: OECHL100310\_13.8023.8023.2.dta

Data file \\BOROMIR\Masse\Data LTQ-Orbitrap\Chrystelle Lacroix\Etude clinique sJPU\OECHL100310\_13.raw

**Monoisotopic mass of neutral peptide Mr(calc):** 1823.793045 **Fixed modifications:** Carbamidomethyl (C) (apply to specified residues or termini only) **Ions**

**Score:** 51 **Expect:** 0.00053 **Matches :** 33/162 fragment ions using 75 most intense peaks ([help](#))

| # | b                 | b <sup>++</sup> | b <sup>*</sup>    | b <sup>*++</sup> | b <sup>0</sup> | b <sup>0++</sup> | Seq.     | y                  | y <sup>++</sup>   | y <sup>*</sup> | y <sup>*++</sup> | y <sup>0</sup> | y <sup>0++</sup> |
|---|-------------------|-----------------|-------------------|------------------|----------------|------------------|----------|--------------------|-------------------|----------------|------------------|----------------|------------------|
| 1 | 115.050203        | 58.028740       | 98.023654         | 49.515465        |                |                  | <b>N</b> |                    |                   |                |                  |                |                  |
| 2 | <b>275.080852</b> | 138.044064      | <b>258.054303</b> | 129.530790       |                |                  | <b>C</b> | 1710.757418        | <b>855.882347</b> | 1693.730869    | 847.369073       | 1692.746853    | 846.8770         |
| 3 | <b>332.102316</b> | 166.554796      | 315.075767        | 158.041521       |                |                  | <b>G</b> | <b>1550.726769</b> | <b>775.867023</b> | 1533.700220    | 767.353748       | 1532.716204    | 766.8617         |
| 4 | <b>495.165645</b> | 248.086460      | 478.139096        | 239.573186       |                |                  | <b>Y</b> | <b>1493.705305</b> | <b>747.356291</b> | 1476.678756    | 738.843016       | 1475.694740    | 738.3510         |

|    |                    |                   |                   |            |             |            |   |                    |            |             |            |                    |          |
|----|--------------------|-------------------|-------------------|------------|-------------|------------|---|--------------------|------------|-------------|------------|--------------------|----------|
| 5  | 592.218409         | 296.612843        | 575.191860        | 288.099568 |             |            | P | <b>1330.641976</b> | 665.824626 | 1313.615427 | 657.311352 | 1312.631411        | 656.8193 |
| 6  | 649.239873         | 325.123575        | 632.213324        | 316.610300 |             |            | G | <b>1233.589212</b> | 617.298244 | 1216.562663 | 608.784970 | 1215.578647        | 608.2929 |
| 7  | 762.323937         | <b>381.665607</b> | <b>745.297388</b> | 373.152332 |             |            | I | <b>1176.567748</b> | 588.787512 | 1159.541199 | 580.274238 | 1158.557183        | 579.7822 |
| 8  | 849.355965         | 425.181621        | <b>832.329416</b> | 416.668346 | 831.345400  | 416.176338 | S | <b>1063.483684</b> | 532.245480 | 1046.457135 | 523.732206 | <b>1045.473119</b> | 523.2401 |
| 9  | 946.408729         | 473.708003        | 929.382180        | 465.194728 | 928.398164  | 464.702720 | P | <b>976.451656</b>  | 488.729466 | 959.425107  | 480.216192 | <b>958.441091</b>  | 479.7241 |
| 10 | <b>1075.451322</b> | 538.229299        | 1058.424773       | 529.716025 | 1057.440757 | 529.224017 | E | 879.398892         | 440.203084 | 862.372343  | 431.689810 | 861.388327         | 431.1978 |
| 11 | <b>1204.493915</b> | 602.750596        | 1187.467366       | 594.237321 | 1186.483350 | 593.745313 | E | <b>750.356299</b>  | 375.681788 | 733.329750  | 367.168513 | 732.345734         | 366.6765 |
| 12 | <b>1364.524564</b> | 682.765920        | 1347.498015       | 674.252646 | 1346.513999 | 673.760638 | C | <b>621.313706</b>  | 311.160491 | 604.287157  | 302.647217 | 603.303141         | 302.1552 |
| 13 | <b>1435.561678</b> | 718.284477        | 1418.535129       | 709.771203 | 1417.551113 | 709.279195 | A | <b>461.283057</b>  | 231.145166 | 444.256508  | 222.631892 | 443.272492         | 222.1398 |
| 14 | 1522.593706        | 761.800491        | 1505.567157       | 753.287217 | 1504.583141 | 752.795209 | S | <b>390.245943</b>  | 195.626610 | 373.219394  | 187.113335 | 372.235378         | 186.6213 |
| 15 | <b>1678.694817</b> | 839.851047        | 1661.668268       | 831.337772 | 1660.684252 | 830.845764 | R | 303.213915         | 152.110595 | 286.187366  | 143.597321 |                    |          |
| 16 |                    |                   |                   |            |             |            | K | 147.112804         | 74.060040  | 130.086255  | 65.546765  |                    |          |

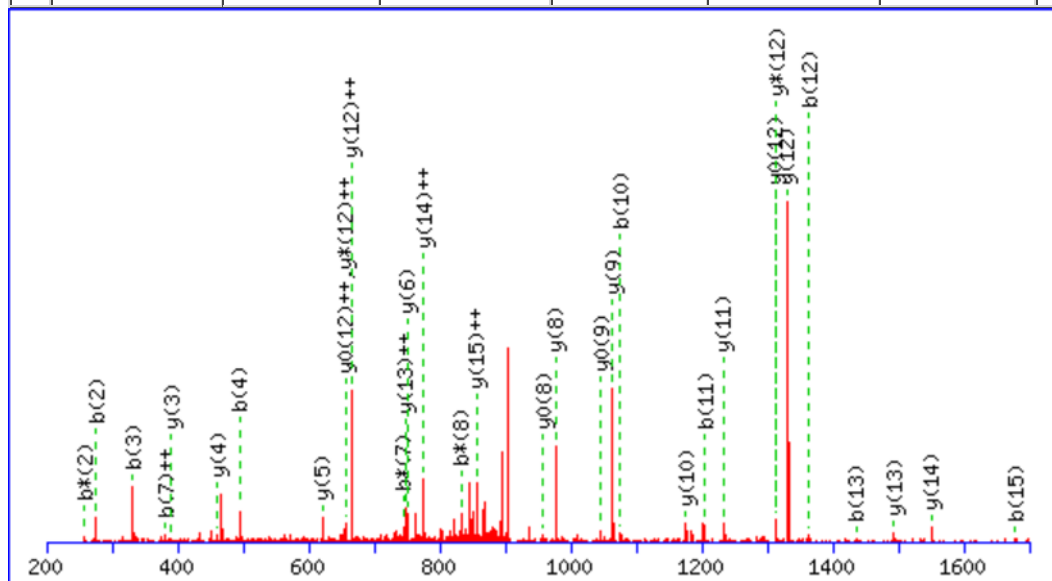

## Peptide View

MS/MS Fragmentation of **CVVTGEDGSESEATVNVK**

Found in **IPI00385035**, Tax\_Id=9606 Gene\_Symbol=NCAM1 Neural cell adhesion molecule (Fragment)

**Experiment:** 49 - PyB-1 **Fraction:** PyB-1

Match to Query 12417: 1879.850248 from(940.932400,2+)

Title: OECHL100310\_13.8354.8354.2.dta

Data file \\BOROMIR\Masse\Data LTQ-Orbitrap\Chrystelle Lacroix\Etude clinique sJPU\OECHL100310\_13.raw

**Monoisotopic mass of neutral peptide Mr(calc):** 1879.846954**Fixed modifications:** Carbamidomethyl (C) (apply to specified residues or termini only)**Ions**

**Score:** 95 **Expect:** 3.3e-008**Matches :** 25/160 fragment ions using 32 most intense peaks ([help](#))

| #  | b                  | b <sup>++</sup>   | b*          | b* <sup>++</sup> | b <sup>0</sup> | b <sup>0++</sup> | Seq. | y                  | y <sup>++</sup>   | y*          | y* <sup>++</sup> | y <sup>0</sup> | y <sup>0++</sup> |
|----|--------------------|-------------------|-------------|------------------|----------------|------------------|------|--------------------|-------------------|-------------|------------------|----------------|------------------|
| 1  | 161.037925         | 81.022600         |             |                  |                |                  | C    |                    |                   |             |                  |                |                  |
| 2  | 260.106339         | 130.556807        |             |                  |                |                  | V    | 1720.823565        | 860.915421        | 1703.797016 | 852.402146       | 1702.813000    | 851.9101         |
| 3  | <b>359.174753</b>  | 180.091015        |             |                  |                |                  | V    | <b>1621.755151</b> | <b>811.381214</b> | 1604.728602 | 802.867939       | 1603.744586    | 802.3759         |
| 4  | <b>460.222432</b>  | 230.614854        |             |                  | 442.211867     | 221.609572       | T    | <b>1522.686737</b> | <b>761.847007</b> | 1505.660188 | 753.333732       | 1504.676172    | 752.8417         |
| 5  | 517.243896         | 259.125586        |             |                  | 499.233331     | 250.120304       | G    | <b>1421.639058</b> | 711.323167        | 1404.612509 | 702.809893       | 1403.628493    | 702.3178         |
| 6  | <b>646.286489</b>  | 323.646883        |             |                  | 628.275924     | 314.641600       | E    | <b>1364.617594</b> | 682.812435        | 1347.591045 | 674.299161       | 1346.607029    | 673.8071         |
| 7  | <b>761.313432</b>  | 381.160354        |             |                  | 743.302867     | 372.155072       | D    | <b>1235.575001</b> | 618.291139        | 1218.548452 | 609.777864       | 1217.564436    | 609.2858         |
| 8  | 818.334896         | 409.671086        |             |                  | 800.324331     | 400.665804       | G    | <b>1120.548058</b> | <b>560.777667</b> | 1103.521509 | 552.264393       | 1102.537493    | 551.7723         |
| 9  | 905.366924         | 453.187100        |             |                  | 887.356359     | 444.181818       | S    | 1063.526594        | 532.266935        | 1046.500045 | 523.753661       | 1045.516029    | 523.2616         |
| 10 | <b>1034.409517</b> | 517.708397        |             |                  | 1016.398952    | 508.703114       | E    | <b>976.494566</b>  | 488.750921        | 959.468017  | 480.237647       | 958.484001     | 479.7456         |
| 11 | <b>1121.441545</b> | <b>561.224411</b> |             |                  | 1103.430980    | 552.219128       | S    | <b>847.451973</b>  | 424.229625        | 830.425424  | 415.716350       | 829.441408     | 415.2243         |
| 12 | 1250.484138        | 625.745707        |             |                  | 1232.473573    | 616.740425       | E    | 760.419945         | 380.713611        | 743.393396  | 372.200336       | 742.409380     | 371.7083         |
| 13 | 1321.521252        | 661.264264        |             |                  | 1303.510687    | 652.258982       | A    | <b>631.377352</b>  | 316.192314        | 614.350803  | 307.679040       | 613.366787     | 307.1870         |
| 14 | <b>1422.568931</b> | 711.788104        |             |                  | 1404.558366    | 702.782821       | T    | <b>560.340238</b>  | 280.673757        | 543.313689  | 272.160483       | 542.329673     | 271.6684         |
| 15 | 1521.637345        | <b>761.322311</b> |             |                  | 1503.626780    | 752.317028       | V    | <b>459.292559</b>  | 230.149918        | 442.266010  | 221.636643       |                |                  |
| 16 | 1635.680272        | 818.343774        | 1618.653723 | 809.830500       | 1617.669707    | 809.338492       | N    | <b>360.224145</b>  | 180.615711        | 343.197596  | 172.102436       |                |                  |
| 17 | <b>1734.748686</b> | 867.877981        | 1717.722137 | 859.364707       | 1716.738121    | 858.872699       | V    | 246.181218         | 123.594247        | 229.154669  | 115.080973       |                |                  |
| 18 |                    |                   |             |                  |                |                  | K    | 147.112804         | 74.060040         | 130.086255  | 65.546765        |                |                  |

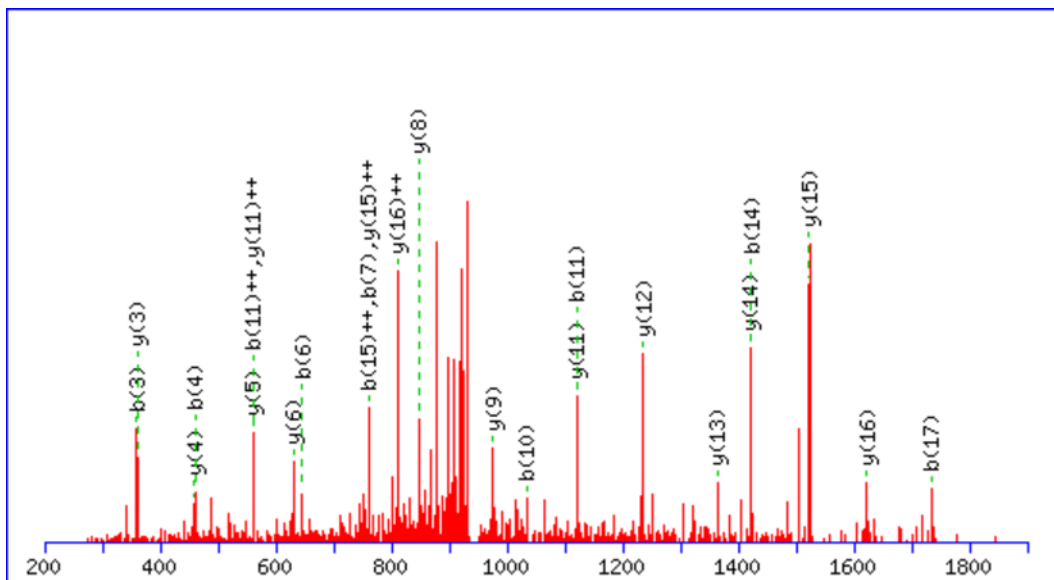

## Peptide View

MS/MS Fragmentation of **QLGPQPQDIHYYEDGVVPTDRR**

Found in **IPI00015199**, Tax\_Id=9606 Gene\_Symbol=CD7 T-cell antigen CD7

Experiment: 49 - PyB-1 Fraction: PyB-1

Match to Query 15475: 2659.326372 from(887.449400,3+)

Title: OECHL100310\_13.16195.16195.3.dta

Data file \\BOROMIR\Masse\Data LTQ-Orbitrap\Chrystelle Lacroix\Etude clinique sJPU\OECHL100310\_13.raw

**Monoisotopic mass of neutral peptide Mr(calc): 2659.324203** Fixed modifications: Carbamidomethyl (C) (apply to specified residues or termini only) Ions

Score: 65 Expect: 6.5e-005 Matches : 47/246 fragment ions using 120 most intense peaks ([help](#))

| # | b                 | b <sup>++</sup> | b*                | b <sup>*++</sup> | b <sup>0</sup> | b <sup>0++</sup> | Seq. | y           | y <sup>++</sup> | y*          | y <sup>*++</sup> | y <sup>0</sup> |     |
|---|-------------------|-----------------|-------------------|------------------|----------------|------------------|------|-------------|-----------------|-------------|------------------|----------------|-----|
| 1 | 129.065854        | 65.036565       | 112.039305        | 56.523291        |                |                  | Q    |             |                 |             |                  |                |     |
| 2 | 242.149918        | 121.578597      | 225.123369        | 113.065323       |                |                  | L    | 2532.272897 | 1266.640086     | 2515.246348 | 1258.126812      | 2514.262332    | 12: |
| 3 | 299.171382        | 150.089329      | 282.144833        | 141.576055       |                |                  | G    | 2419.188833 | 1210.098054     | 2402.162284 | 1201.584780      | 2401.178268    | 12: |
| 4 | <b>396.224146</b> | 198.615711      | 379.197597        | 190.102436       |                |                  | P    | 2362.167369 | 1181.587322     | 2345.140820 | 1173.074048      | 2344.156804    | 11: |
| 5 | 524.282724        | 262.645000      | <b>507.256175</b> | 254.131726       |                |                  | Q    | 2265.114605 | 1133.060940     | 2248.088056 | 1124.547666      | 2247.104040    | 11: |

|    |             |             |             |             |             |             |   |             |             |             |             |             |    |
|----|-------------|-------------|-------------|-------------|-------------|-------------|---|-------------|-------------|-------------|-------------|-------------|----|
| 6  | 621.335488  | 311.171382  | 604.308939  | 302.658108  |             |             | P | 2137.056027 | 1069.031651 | 2120.029478 | 1060.518377 | 2119.045462 | 10 |
| 7  | 749.394066  | 375.200671  | 732.367517  | 366.687397  |             |             | Q | 2040.003263 | 1020.505269 | 2022.976714 | 1011.991995 | 2021.992698 | 10 |
| 8  | 864.421009  | 432.714143  | 847.394460  | 424.200868  | 846.410444  | 423.708860  | D | 1911.944685 | 956.475980  | 1894.918136 | 947.962706  | 1893.934120 | 9  |
| 9  | 977.505073  | 489.256175  | 960.478524  | 480.742900  | 959.494508  | 480.250892  | I | 1796.917742 | 898.962509  | 1779.891193 | 890.449234  | 1778.907177 | 8  |
| 10 | 1090.589137 | 545.798206  | 1073.562588 | 537.284932  | 1072.578572 | 536.792924  | I | 1683.833678 | 842.420477  | 1666.807129 | 833.907202  | 1665.823113 | 8  |
| 11 | 1253.652466 | 627.329871  | 1236.625917 | 618.816597  | 1235.641901 | 618.324589  | Y | 1570.749614 | 785.878445  | 1553.723065 | 777.365170  | 1552.739049 | 7  |
| 12 | 1416.715795 | 708.861536  | 1399.689246 | 700.348261  | 1398.705230 | 699.856253  | Y | 1407.686285 | 704.346780  | 1390.659736 | 695.833506  | 1389.675720 | 6  |
| 13 | 1545.758388 | 773.382832  | 1528.731839 | 764.869558  | 1527.747823 | 764.377549  | E | 1244.622956 | 622.815116  | 1227.596407 | 614.301841  | 1226.612391 | 6  |
| 14 | 1660.785331 | 830.896304  | 1643.758782 | 822.383029  | 1642.774766 | 821.891021  | D | 1115.580363 | 558.293819  | 1098.553814 | 549.780545  | 1097.569798 | 5  |
| 15 | 1717.806795 | 859.407036  | 1700.780246 | 850.893761  | 1699.796230 | 850.401753  | G | 1000.553420 | 500.780348  | 983.526871  | 492.267073  | 982.542855  | 4  |
| 16 | 1816.875209 | 908.941243  | 1799.848660 | 900.427968  | 1798.864644 | 899.935960  | V | 943.531956  | 472.269616  | 926.505407  | 463.756341  | 925.521391  | 4  |
| 17 | 1915.943623 | 958.475450  | 1898.917074 | 949.962175  | 1897.933058 | 949.470167  | V | 844.463542  | 422.735409  | 827.436993  | 414.222134  | 826.452977  | 4  |
| 18 | 2012.996387 | 1007.001832 | 1995.969838 | 998.488557  | 1994.985822 | 997.996549  | P | 745.395128  | 373.201202  | 728.368579  | 364.687927  | 727.384563  | 3  |
| 19 | 2114.044066 | 1057.525671 | 2097.017517 | 1049.012396 | 2096.033501 | 1048.520388 | T | 648.342364  | 324.674820  | 631.315815  | 316.161545  | 630.331799  | 3  |
| 20 | 2215.091745 | 1108.049510 | 2198.065196 | 1099.536236 | 2197.081180 | 1099.044228 | T | 547.294685  | 274.150980  | 530.268136  | 265.637706  | 529.284120  | 2  |
| 21 | 2330.118688 | 1165.562982 | 2313.092139 | 1157.049707 | 2312.108123 | 1156.557699 | D | 446.247006  | 223.627141  | 429.220457  | 215.113866  | 428.236441  | 2  |
| 22 | 2486.219799 | 1243.613537 | 2469.193250 | 1235.100263 | 2468.209234 | 1234.608255 | R | 331.220063  | 166.113669  | 314.193514  | 157.600395  |             |    |
| 23 |             |             |             |             |             |             | R | 175.118952  | 88.063114   | 158.092403  | 79.549839   |             |    |

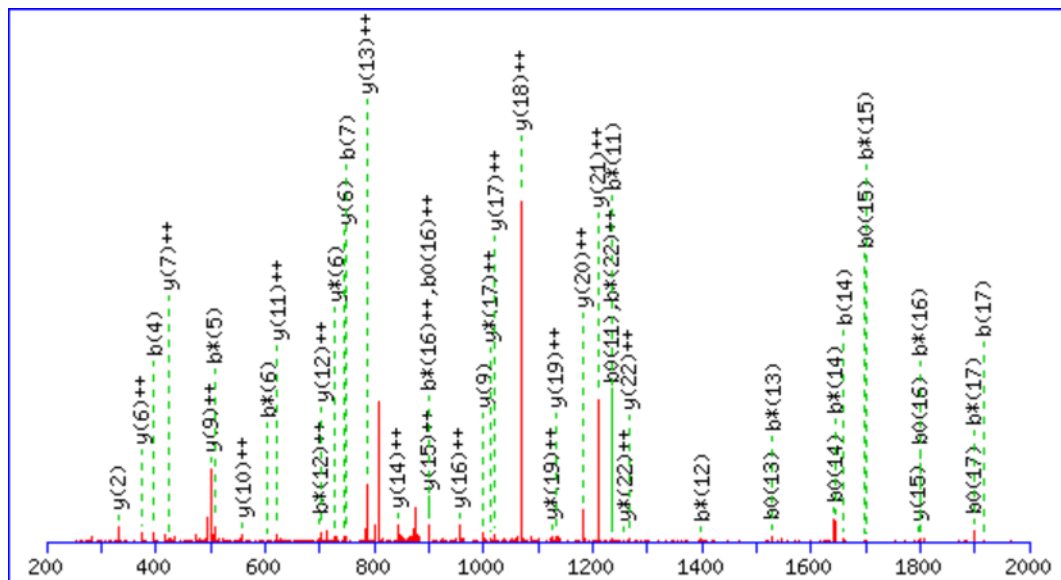

## Peptide View

MS/MS Fragmentation of **IESVLSSGKR**

Found in **IPI0018236**, Tax\_Id=9606 Gene\_Symbol=GM2A Ganglioside GM2 activator

**Experiment:** 49 - PyB-1 **Fraction:** PyB-1

Match to Query 4434: 1161.635048 from(581.824800,2+)

Title: OECHL100310\_13.5197.5197.2.dta

Data file \\BOROMIR\Masse\Data LTQ-Orbitrap\Chrystelle Lacroix\Etude clinique sJPU\OECHL100310\_13.raw

**Monoisotopic mass of neutral peptide Mr(calc):** 1161.635330 **Fixed modifications:** Carbamidomethyl (C) (apply to specified residues or termini only) **Ions**

**Score:** 55 **Expect:** 0.00021 **Matches :** 33/94 fragment ions using 60 most intense peaks ([help](#))

| # | b                 | b <sup>++</sup>   | b* | b <sup>*++</sup> | b <sup>0</sup>    | b <sup>0++</sup> | Seq. | y                  | y <sup>++</sup>   | y*                | y <sup>*++</sup>  | y <sup>0</sup>    | y <sup>0++</sup>  |
|---|-------------------|-------------------|----|------------------|-------------------|------------------|------|--------------------|-------------------|-------------------|-------------------|-------------------|-------------------|
| 1 | 114.091340        | 57.549308         |    |                  |                   |                  | I    |                    |                   |                   |                   |                   |                   |
| 2 | <b>243.133933</b> | 122.070605        |    |                  | 225.123368        | 113.065322       | E    | <b>1049.558562</b> | <b>525.282919</b> | 1032.532013       | <b>516.769645</b> | 1031.547997       | <b>516.277637</b> |
| 3 | <b>330.165961</b> | 165.586618        |    |                  | <b>312.155396</b> | 156.581336       | S    | <b>920.515969</b>  | <b>460.761623</b> | <b>903.489420</b> | <b>452.248348</b> | <b>902.505404</b> | <b>451.756340</b> |
| 4 | <b>429.234375</b> | <b>215.120826</b> |    |                  | <b>411.223810</b> | 206.115543       | V    | <b>833.483941</b>  | <b>417.245609</b> | <b>816.457392</b> | <b>408.732334</b> | <b>815.473376</b> | <b>408.240326</b> |
| 5 | 542.318439        | 271.662858        |    |                  | 524.307874        | 262.657575       | L    | <b>734.415527</b>  | <b>367.711402</b> | <b>717.388978</b> | <b>359.198127</b> | <b>716.404962</b> | 358.706119        |



|    |            |            |            |            |            |            |   |            |            |            |            |            |            |
|----|------------|------------|------------|------------|------------|------------|---|------------|------------|------------|------------|------------|------------|
| 6  | 629.350467 | 315.178872 |            |            | 611.339902 | 306.173589 | S | 621.331463 | 311.169370 | 604.304914 | 302.656095 | 603.320898 | 302.164087 |
| 7  | 716.382495 | 358.694886 |            |            | 698.371930 | 349.689603 | S | 534.299435 | 267.653356 | 517.272886 | 259.140081 | 516.288870 | 258.648073 |
| 8  | 803.414523 | 402.210899 |            |            | 785.403958 | 393.205617 | S | 447.267407 | 224.137342 | 430.240858 | 215.624067 | 429.256842 | 215.132059 |
| 9  | 860.435987 | 430.721632 |            |            | 842.425422 | 421.716349 | G | 360.235379 | 180.621328 | 343.208830 | 172.108053 |            |            |
| 10 | 988.530950 | 494.769113 | 971.504401 | 486.255838 | 970.520385 | 485.763830 | K | 303.213915 | 152.110596 | 286.187366 | 143.597321 |            |            |
| 11 |            |            |            |            |            |            | R | 175.118952 | 88.063114  | 158.092403 | 79.549840  |            |            |

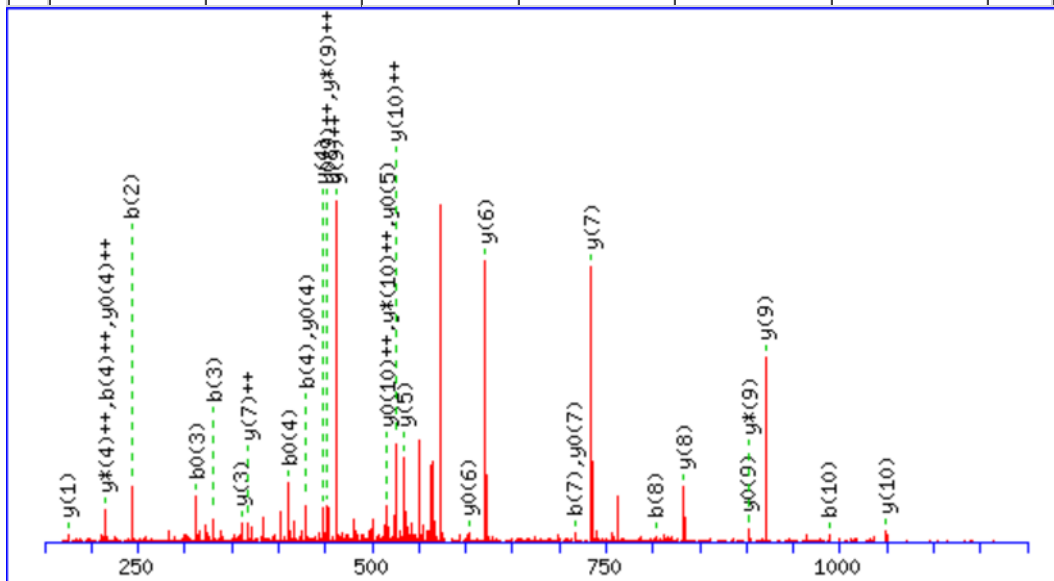

## Peptide View

MS/MS Fragmentation of **FSGVITQGR**

Found in **IPI00220588**, Tax\_Id=9606 Gene\_Symbol=CPXM1 39 kDa protein

**Experiment:** 49 - PyB-1 **Fraction:** PyB-1

Match to Query 1930: 963.513848 from(482.764200,2+)

Title: OECHL100310\_13.8048.8048.2.dta

Data file \\BOROMIR\Masse\Data LTQ-Orbitrap\Chrystelle Lacroix\Etude clinique sJPU\OECHL100310\_13.raw

**Monoisotopic mass of neutral peptide Mr(calc):** 963.513794 **Fixed modifications:** Carbamidomethyl (C) (apply to specified residues or termini only) **Ions Score:**

55 **Expect:** 0.0002 **Matches :** 15/76 fragment ions using 35 most intense peaks ([help](#))

| # | b                 | b <sup>++</sup> | b*         | b <sup>*++</sup> | b <sup>0</sup>    | b <sup>0++</sup> | Seq. | y                 | y <sup>++</sup> | y*         | y <sup>*++</sup> | y <sup>0</sup> | y <sup>0++</sup> | # |
|---|-------------------|-----------------|------------|------------------|-------------------|------------------|------|-------------------|-----------------|------------|------------------|----------------|------------------|---|
| 1 | 148.075690        | 74.541483       |            |                  |                   |                  | F    |                   |                 |            |                  |                |                  | 9 |
| 2 | <b>235.107718</b> | 118.057497      |            |                  | 217.097153        | 109.052214       | S    | <b>817.452643</b> | 409.229960      | 800.426094 | 400.716685       | 799.442078     | 400.224677       | 8 |
| 3 | <b>292.129182</b> | 146.568229      |            |                  | <b>274.118617</b> | 137.562946       | G    | <b>730.420615</b> | 365.713946      | 713.394066 | 357.200671       | 712.410050     | 356.708663       | 7 |
| 4 | <b>391.197596</b> | 196.102436      |            |                  | 373.187031        | 187.097153       | V    | <b>673.399151</b> | 337.203214      | 656.372602 | 328.689939       | 655.388586     | 328.197931       | 6 |
| 5 | 504.281660        | 252.644468      |            |                  | 486.271095        | 243.639186       | I    | <b>574.330737</b> | 287.669007      | 557.304188 | 279.155732       | 556.320172     | 278.663724       | 5 |
| 6 | <b>605.329339</b> | 303.168308      |            |                  | 587.318774        | 294.163025       | T    | <b>461.246673</b> | 231.126975      | 444.220124 | 222.613700       | 443.236108     | 222.121692       | 4 |
| 7 | <b>733.387917</b> | 367.197597      | 716.361368 | 358.684322       | 715.377352        | 358.192314       | Q    | <b>360.198994</b> | 180.603135      | 343.172445 | 172.089861       |                |                  | 3 |
| 8 | <b>790.409381</b> | 395.708329      | 773.382832 | 387.195054       | 772.398816        | 386.703046       | G    | <b>232.140416</b> | 116.573846      | 215.113867 | 108.060572       |                |                  | 2 |
| 9 |                   |                 |            |                  |                   |                  | R    | <b>175.118952</b> | 88.063114       | 158.092403 | 79.549840        |                |                  | 1 |

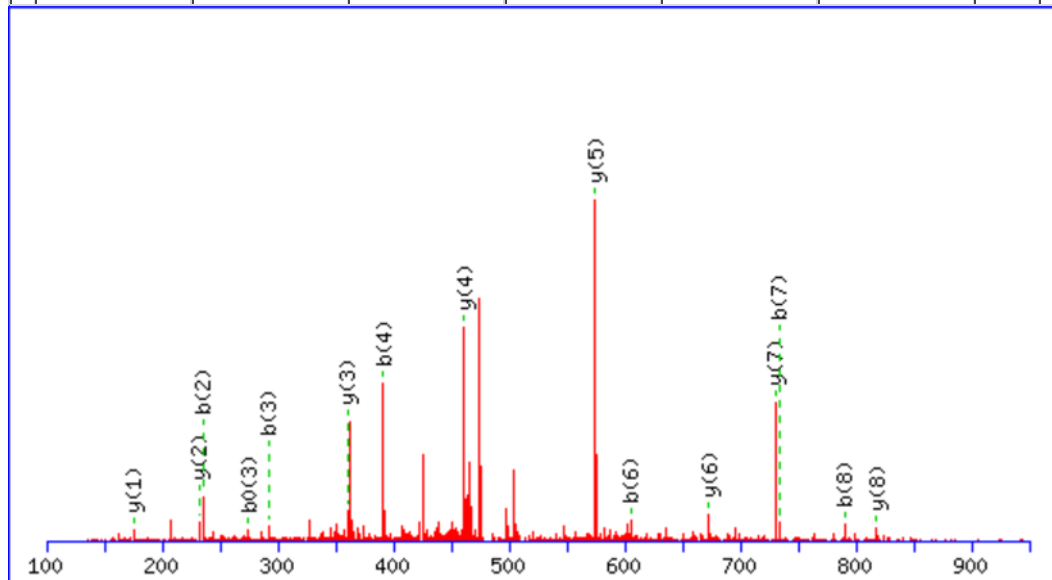

## Peptide View

MS/MS Fragmentation of **AVFVDLEPTVIDEVR**

Found in **IPI00166768**, Tax\_Id=9606 Gene\_Symbol=TUBA1C TUBA1C protein

Experiment: 49 - PyB-1 Fraction: PyB-1

Match to Query 10962: 1700.898648 from(851.456600,2+)

Title: OECHL100310\_13.18064.18064.2.dta

Data file \\BOROMIR\Masse\Data LTQ-Orbitrap\Chrystelle Lacroix\Etude clinique sJPU\OECHL100310\_13.raw

**Monoisotopic mass of neutral peptide Mr(calc):** 1700.898514**Fixed modifications:** Carbamidomethyl (C) (apply to specified residues or termini only)**Ions**

**Score:** 54 **Expect:** 0.00045**Matches :** 12/128 fragment ions using 15 most intense peaks ([help](#))

| #  | b                  | b <sup>++</sup> | b <sup>0</sup> | b <sup>0++</sup> | Seq. | y                  | y <sup>++</sup> | y*          | y* <sup>++</sup> | y <sup>0</sup> | y <sup>0++</sup> | #  |
|----|--------------------|-----------------|----------------|------------------|------|--------------------|-----------------|-------------|------------------|----------------|------------------|----|
| 1  | 72.044390          | 36.525833       |                |                  | A    |                    |                 |             |                  |                |                  | 15 |
| 2  | 171.112804         | 86.060040       |                |                  | V    | 1630.868665        | 815.937971      | 1613.842116 | 807.424696       | 1612.858100    | 806.932688       | 14 |
| 3  | <b>318.181218</b>  | 159.594247      |                |                  | F    | 1531.800251        | 766.403764      | 1514.773702 | 757.890489       | 1513.789686    | 757.398481       | 13 |
| 4  | <b>417.249632</b>  | 209.128454      |                |                  | V    | <b>1384.731837</b> | 692.869557      | 1367.705288 | 684.356282       | 1366.721272    | 683.864274       | 12 |
| 5  | 532.276575         | 266.641926      | 514.266010     | 257.636643       | D    | <b>1285.663423</b> | 643.335350      | 1268.636874 | 634.822075       | 1267.652858    | 634.330067       | 11 |
| 6  | <b>645.360639</b>  | 323.183958      | 627.350074     | 314.178675       | L    | <b>1170.636480</b> | 585.821878      | 1153.609931 | 577.308604       | 1152.625915    | 576.816596       | 10 |
| 7  | <b>774.403232</b>  | 387.705254      | 756.392667     | 378.699972       | E    | <b>1057.552416</b> | 529.279846      | 1040.525867 | 520.766572       | 1039.541851    | 520.274564       | 9  |
| 8  | 871.455996         | 436.231636      | 853.445431     | 427.226354       | P    | <b>928.509823</b>  | 464.758550      | 911.483274  | 456.245275       | 910.499258     | 455.753267       | 8  |
| 9  | 972.503675         | 486.755476      | 954.493110     | 477.750193       | T    | 831.457059         | 416.232168      | 814.430510  | 407.718893       | 813.446494     | 407.226885       | 7  |
| 10 | 1071.572089        | 536.289683      | 1053.561524    | 527.284400       | V    | 730.409380         | 365.708328      | 713.382831  | 357.195054       | 712.398815     | 356.703046       | 6  |
| 11 | 1184.656153        | 592.831715      | 1166.645588    | 583.826432       | I    | <b>631.340966</b>  | 316.174121      | 614.314417  | 307.660846       | 613.330401     | 307.168838       | 5  |
| 12 | 1299.683096        | 650.345186      | 1281.672531    | 641.339904       | D    | <b>518.256902</b>  | 259.632089      | 501.230353  | 251.118815       | 500.246337     | 250.626807       | 4  |
| 13 | 1428.725689        | 714.866483      | 1410.715124    | 705.861200       | E    | 403.229959         | 202.118617      | 386.203410  | 193.605343       | 385.219394     | 193.113335       | 3  |
| 14 | <b>1527.794103</b> | 764.400690      | 1509.783538    | 755.395407       | V    | 274.187366         | 137.597321      | 257.160817  | 129.084047       |                |                  | 2  |
| 15 |                    |                 |                |                  | R    | 175.118952         | 88.063114       | 158.092403  | 79.549839        |                |                  | 1  |

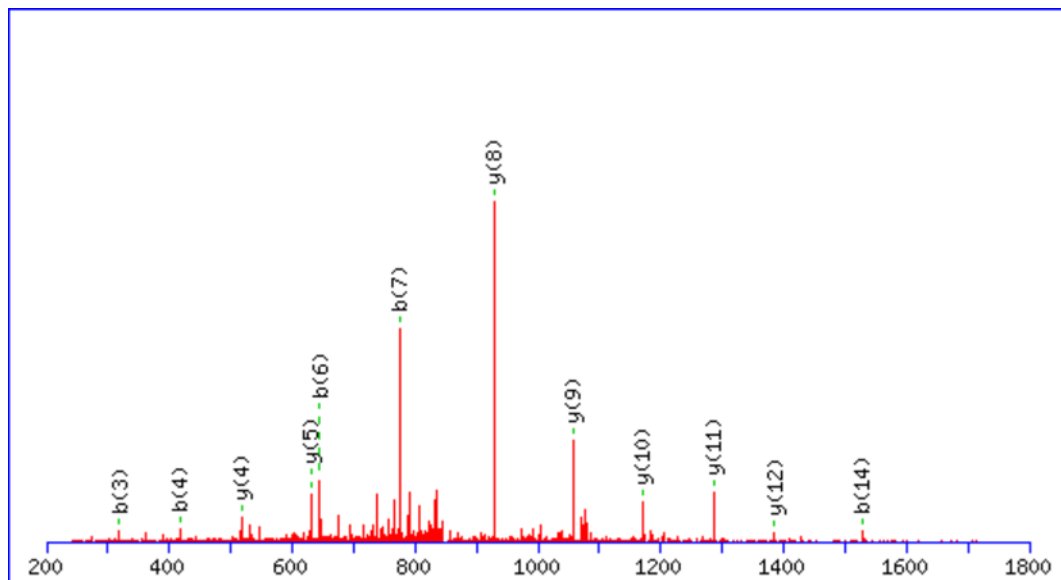

## Peptide View

MS/MS Fragmentation of **SVAIEVDGR**

Found in **IPI00297252**, Tax\_Id=9606 Gene\_Symbol=SULF2 Isoform 1 of Extracellular sulfatase Sulf-2

**Experiment:** 49 - PyB-1 **Fraction:** PyB-1

Match to Query 1577: 944.492848 from(473.253700,2+)

Title: OECHL100310\_13.8229.8229.2.dta

Data file \\BOROMIR\Masse\Data LTQ-Orbitrap\Chrystelle Lacroix\Etude clinique sJPU\OECHL100310\_13.raw

**Monoisotopic mass of neutral peptide Mr(calc):** 944.492706 **Fixed modifications:** Carbamidomethyl (C) (apply to specified residues or termini only) **Ions Score:**

52 **Expect:** 0.00093 **Matches :** 18/76 fragment ions using 40 most intense peaks ([help](#))

| # | b                 | b <sup>++</sup> | b <sup>0</sup> | b <sup>0++</sup> | Seq. | y                 | y <sup>++</sup>   | y <sup>*</sup> | y <sup>*++</sup>  | y <sup>0</sup> | y <sup>0++</sup>  | # |
|---|-------------------|-----------------|----------------|------------------|------|-------------------|-------------------|----------------|-------------------|----------------|-------------------|---|
| 1 | 88.039304         | 44.523290       | 70.028739      | 35.518008        | S    |                   |                   |                |                   |                |                   | 9 |
| 2 | <b>187.107718</b> | 94.057497       | 169.097153     | 85.052214        | V    | <b>858.467958</b> | 429.737617        | 841.441409     | 421.224343        | 840.457393     | 420.732335        | 8 |
| 3 | <b>258.144832</b> | 129.576054      | 240.134267     | 120.570772       | A    | <b>759.399544</b> | <b>380.203410</b> | 742.372995     | <b>371.690136</b> | 741.388979     | <b>371.198128</b> | 7 |
| 4 | <b>371.228896</b> | 186.118086      | 353.218331     | 177.112804       | I    | <b>688.362430</b> | 344.684853        | 671.335881     | 336.171579        | 670.351865     | 335.679571        | 6 |
| 5 | <b>500.271489</b> | 250.639383      | 482.260924     | 241.634100       | E    | <b>575.278366</b> | 288.142821        | 558.251817     | 279.629547        | 557.267801     | 279.137539        | 5 |

|   |            |            |            |            |   |            |            |            |            |            |            |   |
|---|------------|------------|------------|------------|---|------------|------------|------------|------------|------------|------------|---|
| 6 | 599.339903 | 300.173590 | 581.329338 | 291.168307 | V | 446.235773 | 223.621524 | 429.209224 | 215.108250 | 428.225208 | 214.616242 | 4 |
| 7 | 714.366846 | 357.687061 | 696.356281 | 348.681779 | D | 347.167359 | 174.087317 | 330.140810 | 165.574043 | 329.156794 | 165.082035 | 3 |
| 8 | 771.388310 | 386.197793 | 753.377745 | 377.192511 | G | 232.140416 | 116.573846 | 215.113867 | 108.060571 |            |            | 2 |
| 9 |            |            |            |            | R | 175.118952 | 88.063114  | 158.092403 | 79.549839  |            |            | 1 |

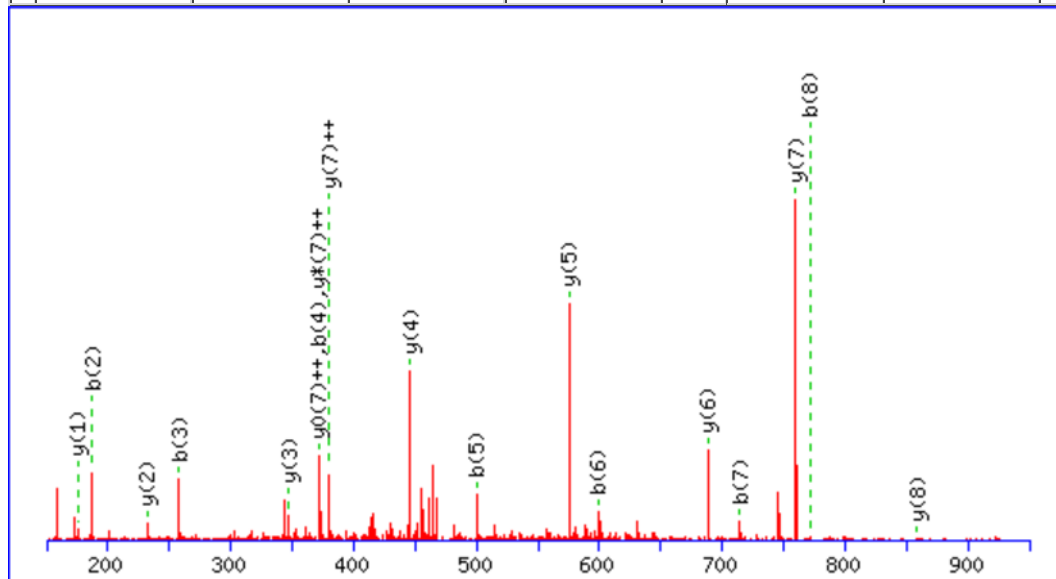

## Peptide View

MS/MS Fragmentation of **SEKSVEAAAELSAK**

Found in **IPI00550020**, Tax\_Id=9606 Gene\_Symbol=PTMS Parathymosin

Experiment: 49 - PyB-1 Fraction: PyB-1

Match to Query 8087: 1460.733648 from(731.374100,2+)

Title: OECHL100310\_13.11245.11245.2.dta

Data file \\BOROMIR\Masse\Data LTQ-Orbitrap\Chrystelle Lacroix\Etude clinique sJPU\OECHL100310\_13.raw

**Monoisotopic mass of neutral peptide Mr(calc):** 1460.735794 **Fixed modifications:** Carbamidomethyl (C) (apply to specified residues or termini only) **Variable**

**modifications:** N-term : Acetyl (N-term) **Ions Score:** 58 **Expect:** 0.00021 **Matches :** 29/148 fragment ions using 48 most intense peaks ([help](#))

| # | b          | b <sup>++</sup> | b <sup>*</sup> | b <sup>*++</sup> | b <sup>0</sup> | b <sup>0++</sup> | Seq. | y | y <sup>++</sup> | y <sup>*</sup> | y <sup>*++</sup> | y <sup>0</sup> | y <sup>0++</sup> |
|---|------------|-----------------|----------------|------------------|----------------|------------------|------|---|-----------------|----------------|------------------|----------------|------------------|
| 1 | 130.049869 | 65.528572       |                |                  | 112.039304     | 56.523290        | S    |   |                 |                |                  |                |                  |

|    |                    |                   |                    |            |                    |            |   |                    |                   |             |            |                    |          |
|----|--------------------|-------------------|--------------------|------------|--------------------|------------|---|--------------------|-------------------|-------------|------------|--------------------|----------|
| 2  | 259.092462         | 130.049869        |                    |            | 241.081897         | 121.044586 | E | 1332.700536        | 666.853906        | 1315.673987 | 658.340631 | 1314.689971        | 657.8486 |
| 3  | <b>387.187425</b>  | 194.097350        | 370.160876         | 185.584076 | <b>369.176860</b>  | 185.092068 | K | <b>1203.657943</b> | <b>602.332609</b> | 1186.631394 | 593.819335 | 1185.647378        | 593.3273 |
| 4  | <b>474.219453</b>  | 237.613364        | 457.192904         | 229.100090 | <b>456.208888</b>  | 228.608082 | S | <b>1075.562980</b> | 538.285128        | 1058.536431 | 529.771854 | <b>1057.552415</b> | 529.2798 |
| 5  | <b>573.287867</b>  | 287.147571        | 556.261318         | 278.634297 | 555.277302         | 278.142289 | V | <b>988.530952</b>  | 494.769114        | 971.504403  | 486.255839 | 970.520387         | 485.7638 |
| 6  | 702.330460         | <b>351.668868</b> | 685.303911         | 343.155593 | 684.319895         | 342.663585 | E | <b>889.462538</b>  | 445.234907        | 872.435989  | 436.721633 | 871.451973         | 436.2296 |
| 7  | 773.367574         | <b>387.187425</b> | 756.341025         | 378.674150 | 755.357009         | 378.182142 | A | <b>760.419945</b>  | <b>380.713611</b> | 743.393396  | 372.200336 | 742.409380         | 371.7083 |
| 8  | <b>844.404688</b>  | 422.705982        | 827.378139         | 414.192707 | 826.394123         | 413.700699 | A | <b>689.382831</b>  | 345.195054        | 672.356282  | 336.681779 | 671.372266         | 336.1897 |
| 9  | 915.441802         | 458.224539        | 898.415253         | 449.711264 | 897.431237         | 449.219256 | A | <b>618.345717</b>  | 309.676497        | 601.319168  | 301.163222 | 600.335152         | 300.6712 |
| 10 | <b>1044.484395</b> | 522.745836        | 1027.457846        | 514.232561 | 1026.473830        | 513.740553 | E | 547.308603         | 274.157940        | 530.282054  | 265.644665 | 529.298038         | 265.1526 |
| 11 | <b>1157.568459</b> | 579.287867        | <b>1140.541910</b> | 570.774593 | 1139.557894        | 570.282585 | L | <b>418.266010</b>  | 209.636643        | 401.239461  | 201.123368 | 400.255445         | 200.6313 |
| 12 | <b>1244.600487</b> | 622.803881        | 1227.573938        | 614.290607 | 1226.589922        | 613.798599 | S | <b>305.181946</b>  | 153.094611        | 288.155397  | 144.581337 | 287.171381         | 144.0893 |
| 13 | <b>1315.637601</b> | 658.322438        | 1298.611052        | 649.809164 | <b>1297.627036</b> | 649.317156 | A | 218.149918         | 109.578597        | 201.123369  | 101.065322 |                    |          |
| 14 |                    |                   |                    |            |                    |            | K | 147.112804         | 74.060040         | 130.086255  | 65.546765  |                    |          |

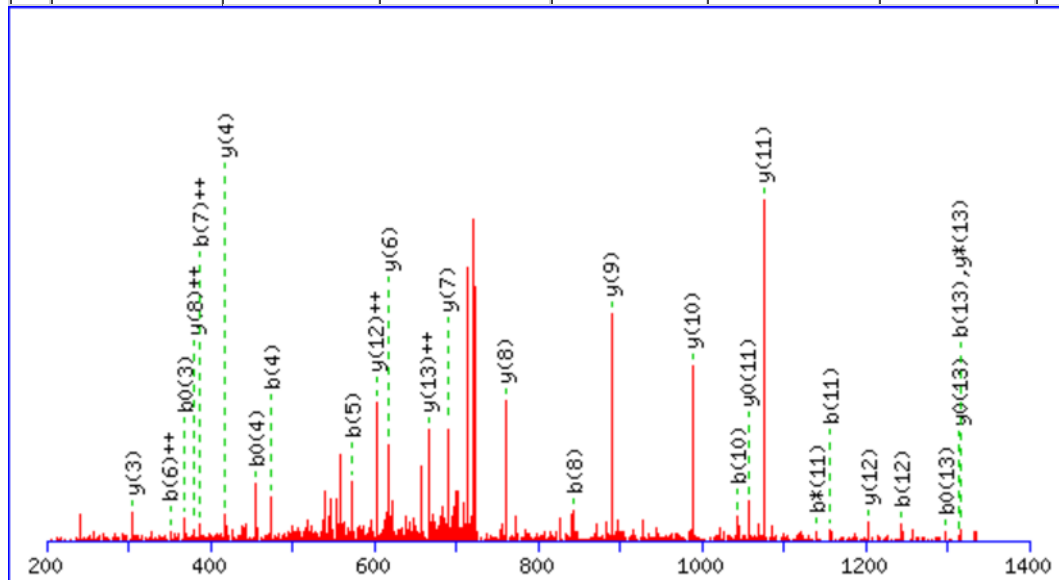

## Peptide View

MS/MS Fragmentation of **SYELTQPPSVSVSPGQTAR**Found in **IPI00382440**, Tax\_Id=9606 Gene\_Symbol=- Ig lambda chain V-IV region Hil**Experiment:** 49 - PyB-1 **Fraction:** PyB-1

Match to Query 13109: 2003.001448 from(1002.508000,2+)

Title: OECHL100310\_13.12568.12568.2.dta

Data file \\BOROMIR\Masse\Data LTQ-Orbitrap\Chrystelle Lacroix\Etude clinique sJPU\OECHL100310\_13.raw

**Monoisotopic mass of neutral peptide Mr(calc):** 2002.995987**Fixed modifications:** Carbamidomethyl (C) (apply to specified residues or termini only)**Ions****Score:** 53 **Expect:** 0.001**Matches :** 42/202 fragment ions using 82 most intense peaks ([help](#))

| #  | b           | b <sup>++</sup> | b*          | b <sup>*++</sup> | b <sup>0</sup> | b <sup>0++</sup> | Seq. | y           | y <sup>++</sup> | y*          | y <sup>*++</sup> | y <sup>0</sup> | y <sup>0++</sup> |
|----|-------------|-----------------|-------------|------------------|----------------|------------------|------|-------------|-----------------|-------------|------------------|----------------|------------------|
| 1  | 88.039304   | 44.523290       |             |                  | 70.028739      | 35.518008        | S    |             |                 |             |                  |                |                  |
| 2  | 251.102633  | 126.054954      |             |                  | 233.092068     | 117.049672       | Y    | 1916.971234 | 958.989255      | 1899.944685 | 950.475981       | 1898.960669    | 949.9839         |
| 3  | 380.145226  | 190.576251      |             |                  | 362.134661     | 181.570969       | E    | 1753.907905 | 877.457591      | 1736.881356 | 868.944316       | 1735.897340    | 868.4523         |
| 4  | 493.229290  | 247.118283      |             |                  | 475.218725     | 238.113001       | L    | 1624.865312 | 812.936294      | 1607.838763 | 804.423020       | 1606.854747    | 803.9310         |
| 5  | 594.276969  | 297.642123      |             |                  | 576.266404     | 288.636840       | T    | 1511.781248 | 756.394262      | 1494.754699 | 747.880988       | 1493.770683    | 747.3889         |
| 6  | 722.335547  | 361.671412      | 705.308998  | 353.158137       | 704.324982     | 352.666129       | Q    | 1410.733569 | 705.870423      | 1393.707020 | 697.357148       | 1392.723004    | 696.8651         |
| 7  | 819.388311  | 410.197794      | 802.361762  | 401.684519       | 801.377746     | 401.192511       | P    | 1282.674991 | 641.841134      | 1265.648442 | 633.327859       | 1264.664426    | 632.8358         |
| 8  | 916.441075  | 458.724176      | 899.414526  | 450.210901       | 898.430510     | 449.718893       | P    | 1185.622227 | 593.314752      | 1168.595678 | 584.801477       | 1167.611662    | 584.3094         |
| 9  | 1003.473103 | 502.240190      | 986.446554  | 493.726915       | 985.462538     | 493.234907       | S    | 1088.569463 | 544.788370      | 1071.542914 | 536.275095       | 1070.558898    | 535.7830         |
| 10 | 1102.541517 | 551.774397      | 1085.514968 | 543.261122       | 1084.530952    | 542.769114       | V    | 1001.537435 | 501.272356      | 984.510886  | 492.759081       | 983.526870     | 492.2670         |
| 11 | 1189.573545 | 595.290411      | 1172.546996 | 586.777136       | 1171.562980    | 586.285128       | S    | 902.469021  | 451.738149      | 885.442472  | 443.224874       | 884.458456     | 442.7328         |
| 12 | 1288.641959 | 644.824618      | 1271.615410 | 636.311343       | 1270.631394    | 635.819335       | V    | 815.436993  | 408.222135      | 798.410444  | 399.708860       | 797.426428     | 399.2168         |
| 13 | 1375.673987 | 688.340632      | 1358.647438 | 679.827357       | 1357.663422    | 679.335349       | S    | 716.368579  | 358.687928      | 699.342030  | 350.174653       | 698.358014     | 349.6826         |
| 14 | 1472.726751 | 736.867014      | 1455.700202 | 728.353739       | 1454.716186    | 727.861731       | P    | 629.336551  | 315.171914      | 612.310002  | 306.658639       | 611.325986     | 306.1666         |
| 15 | 1529.748215 | 765.377746      | 1512.721666 | 756.864471       | 1511.737650    | 756.372463       | G    | 532.283787  | 266.645532      | 515.257238  | 258.132257       | 514.273222     | 257.6402         |
| 16 | 1657.806793 | 829.407035      | 1640.780244 | 820.893760       | 1639.796228    | 820.401752       | Q    | 475.262323  | 238.134800      | 458.235774  | 229.621525       | 457.251758     | 229.1295         |
| 17 | 1758.854472 | 879.930874      | 1741.827923 | 871.417600       | 1740.843907    | 870.925592       | T    | 347.203745  | 174.105510      | 330.177196  | 165.592236       | 329.193180     | 165.1002         |
| 18 | 1829.891586 | 915.449431      | 1812.865037 | 906.936157       | 1811.881021    | 906.444149       | A    | 246.156066  | 123.581671      | 229.129517  | 115.068396       |                |                  |
| 19 |             |                 |             |                  |                |                  | R    | 175.118952  | 88.063114       | 158.092403  | 79.549839        |                |                  |

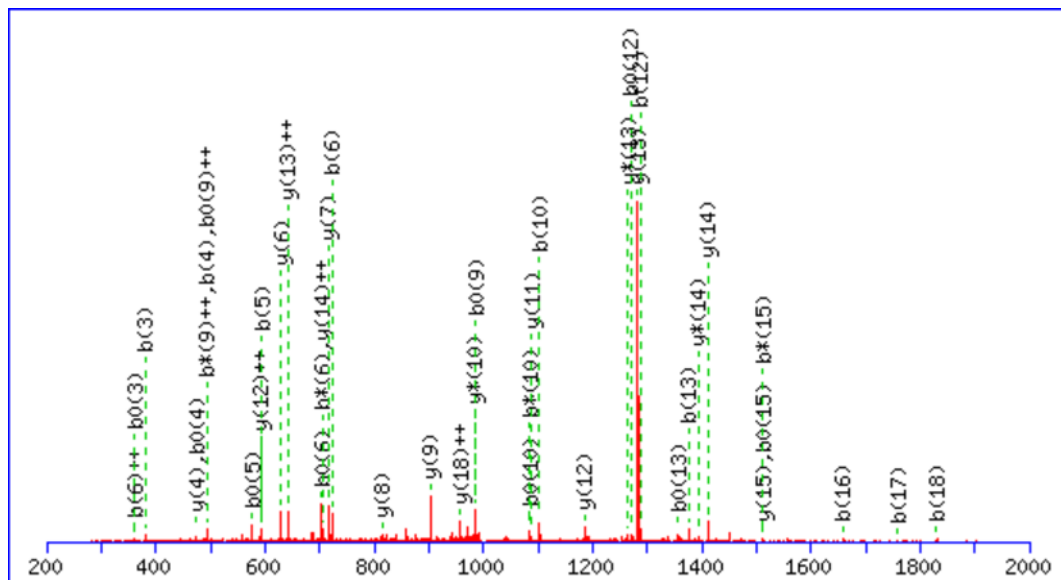

## Peptide View

MS/MS Fragmentation of **NRNEQESAVHPR**

Found in **IPI00396437**, Tax\_Id=9606 Gene\_Symbol=DBNL Isoform 2 of Drebrin-like protein

**Experiment:** 49 - PyB-1 **Fraction:** PyB-1

Match to Query 7839: 1435.694848 from(718.854700,2+)

Title: OECHL100310\_13.1694.1694.2.dta

Data file \\BOROMIR\Masse\Data LTQ-Orbitrap\Chrystelle Lacroix\Etude clinique sJPU\OECHL100310\_13.raw

**Monoisotopic mass of neutral peptide Mr(calc):** 1435.691605 **Fixed modifications:** Carbamidomethyl (C) (apply to specified residues or termini only) **Ions**

**Score:** 52 **Expect:** 0.00074 **Matches :** 24/116 fragment ions using 48 most intense peaks ([help](#))

| # | b                 | b <sup>++</sup> | b*                | b <sup>*++</sup> | b <sup>0</sup> | b <sup>0++</sup> | Seq. | y                  | y <sup>++</sup>   | y*                | y <sup>*++</sup> | y <sup>0</sup>     | y <sup>0++</sup> |
|---|-------------------|-----------------|-------------------|------------------|----------------|------------------|------|--------------------|-------------------|-------------------|------------------|--------------------|------------------|
| 1 | 115.050203        | 58.028740       | 98.023654         | 49.515465        |                |                  | N    |                    |                   |                   |                  |                    |                  |
| 2 | <b>271.151314</b> | 136.079295      | <b>254.124765</b> | 127.566021       |                |                  | R    | 1322.65986         | 661.831631        | 1305.629437       | 653.318357       | 1304.645421        | 652.8263         |
| 3 | <b>385.194241</b> | 193.100759      | 368.167692        | 184.587484       |                |                  | N    | <b>1166.554875</b> | <b>583.781076</b> | 1149.528326       | 575.267801       | <b>1148.544310</b> | 574.7757         |
| 4 | <b>514.236834</b> | 257.622055      | <b>497.210285</b> | 249.108781       | 496.226269     | 248.616773       | E    | <b>1052.511948</b> | 526.759612        | 1035.485399       | 518.246337       | 1034.501383        | 517.7543         |
| 5 | 642.295412        | 321.651344      | 625.268863        | 313.138070       | 624.284847     | 312.646062       | Q    | <b>923.469355</b>  | 462.238316        | <b>906.442806</b> | 453.725041       | 905.458790         | 453.2330         |



|    |                    |                   |                    |            |             |            |          |                   |                   |                   |            |            |          |
|----|--------------------|-------------------|--------------------|------------|-------------|------------|----------|-------------------|-------------------|-------------------|------------|------------|----------|
| 6  | <b>771.338005</b>  | 386.172641        | 754.311456         | 377.659366 | 753.327440  | 377.167358 | <b>E</b> | 795.410777        | 398.209026        | 778.384228        | 389.695752 | 777.400212 | 389.2037 |
| 7  | <b>858.370033</b>  | 429.688655        | 841.343484         | 421.175380 | 840.359468  | 420.683372 | <b>S</b> | <b>666.368184</b> | 333.687730        | 649.341635        | 325.174455 | 648.357619 | 324.6824 |
| 8  | <b>929.407147</b>  | 465.207212        | 912.380598         | 456.693937 | 911.396582  | 456.201929 | <b>A</b> | 579.336156        | 290.171716        | 562.309607        | 281.658441 |            |          |
| 9  | <b>1028.475561</b> | 514.741419        | 1011.449012        | 506.228144 | 1010.464996 | 505.736136 | <b>V</b> | 508.299042        | <b>254.653159</b> | 491.272493        | 246.139884 |            |          |
| 10 | <b>1165.534473</b> | <b>583.270874</b> | <b>1148.507924</b> | 574.757600 | 1147.523908 | 574.265592 | <b>H</b> | <b>409.230628</b> | 205.118952        | <b>392.204079</b> | 196.605677 |            |          |
| 11 | <b>1262.587237</b> | 631.797257        | 1245.560688        | 623.283982 | 1244.576672 | 622.791974 | <b>P</b> | <b>272.171716</b> | 136.589496        | 255.145167        | 128.076221 |            |          |
| 12 |                    |                   |                    |            |             |            | <b>R</b> | 175.118952        | 88.063114         | 158.092403        | 79.549839  |            |          |

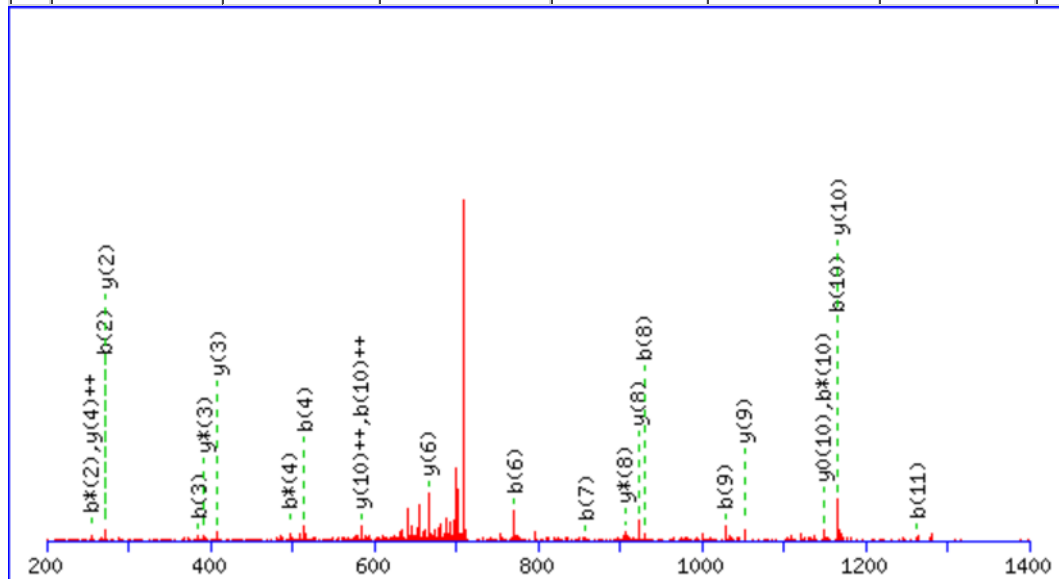

## Peptide View

MS/MS Fragmentation of **VATQEGKEITCR**

Found in **IPI00031564**, Tax\_Id=9606 Gene\_Symbol=GGCT Isoform 1 of Gamma-glutamylcyclotransferase

**Experiment:** 49 - PyB-1 **Fraction:** PyB-1

Match to Query 7485: 1390.687248 from(696.350900,2+)

Title: OECHL100310\_13.3589.3589.2.dta

Data file \\BOROMIR\Masse\Data LTQ-Orbitrap\Chrystelle Lacroix\Etude clinique sJPU\OECHL100310\_13.raw

**Monoisotopic mass of neutral peptide Mr(calc):** 1390.687454 **Fixed modifications:** Carbamidomethyl (C) (apply to specified residues or termini only) **Ions**

Score: 51 Expect: 0.00097 Matches : 24/118 fragment ions using 48 most intense peaks ([help](#))

| #  | b                  | b <sup>++</sup> | b*          | b <sup>*++</sup> | b <sup>0</sup>    | b <sup>0++</sup> | Seq. | y                  | y <sup>++</sup>   | y*                 | y <sup>*++</sup>  | y <sup>0</sup>    | y <sup>0++</sup> |
|----|--------------------|-----------------|-------------|------------------|-------------------|------------------|------|--------------------|-------------------|--------------------|-------------------|-------------------|------------------|
| 1  | 100.075690         | 50.541483       |             |                  |                   |                  | V    |                    |                   |                    |                   |                   |                  |
| 2  | 171.112804         | 86.060040       |             |                  |                   |                  | A    | 1292.626328        | 646.816802        | 1275.599779        | 638.303528        | 1274.615763       | 637.8115         |
| 3  | <b>272.160483</b>  | 136.583879      |             |                  | <b>254.149918</b> | 127.578597       | T    | <b>1221.589214</b> | <b>611.298245</b> | 1204.562665        | 602.784971        | 1203.578649       | 602.2929         |
| 4  | 400.219061         | 200.613169      | 383.192512  | 192.099894       | <b>382.208496</b> | 191.607886       | Q    | <b>1120.541535</b> | <b>560.774406</b> | <b>1103.514986</b> | <b>552.261131</b> | 1102.530970       | <b>551.7691</b>  |
| 5  | 529.261654         | 265.134465      | 512.235105  | 256.621191       | 511.251089        | 256.129183       | E    | <b>992.482957</b>  | 496.745117        | 975.456408         | 488.231842        | <b>974.472392</b> | <b>487.7398</b>  |
| 6  | 586.283118         | 293.645197      | 569.256569  | 285.131923       | 568.272553        | 284.639915       | G    | <b>863.440364</b>  | 432.223820        | 846.413815         | 423.710546        | 845.429799        | 423.2185         |
| 7  | <b>714.378081</b>  | 357.692679      | 697.351532  | 349.179404       | 696.367516        | 348.687396       | K    | <b>806.418900</b>  | 403.713088        | 789.392351         | 395.199814        | 788.408335        | 394.7078         |
| 8  | <b>843.420674</b>  | 422.213975      | 826.394125  | 413.700701       | 825.410109        | 413.208693       | E    | <b>678.323937</b>  | 339.665607        | 661.297388         | 331.152332        | 660.313372        | 330.6603         |
| 9  | <b>956.504738</b>  | 478.756007      | 939.478189  | 470.242733       | 938.494173        | 469.750725       | I    | <b>549.281344</b>  | 275.144310        | 532.254795         | 266.631036        | 531.270779        | 266.1390         |
| 10 | <b>1057.552417</b> | 529.279847      | 1040.525868 | 520.766572       | 1039.541852       | 520.274564       | T    | <b>436.197280</b>  | 218.602278        | 419.170731         | 210.089003        | 418.186715        | 209.5969         |
| 11 | <b>1217.583066</b> | 609.295171      | 1200.556517 | 600.781897       | 1199.572501       | 600.289889       | C    | <b>335.149601</b>  | 168.078438        | 318.123052         | 159.565164        |                   |                  |
| 12 |                    |                 |             |                  |                   |                  | R    | 175.118952         | 88.063114         | 158.092403         | 79.549839         |                   |                  |

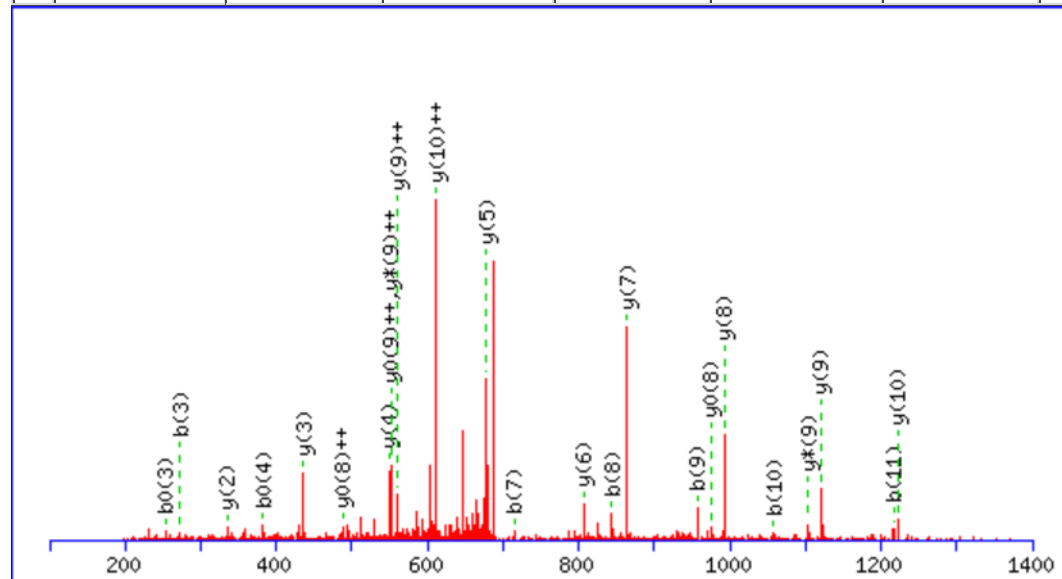

## Peptide View

MS/MS Fragmentation of **TVAGPVGGSLSVQCPYEKEHR**

Found in **IPI00414784**, Tax\_Id=9606 Gene\_Symbol=CD300A Isoform 1 of CMRF35-like molecule 8

**Experiment:** 19 - NOPB1 **Fraction:** NOPB1

Match to Query 13649: 2270.113448 from(1136.064000,2+)

Title: OECHL100310\_11.10021.10021.2.dta

Data file \\BOROMIR\Masse\Data LTQ-Orbitrap\Chrystelle Lacroix\Etude clinique sJPU\OECHL100310\_11.raw

**Monoisotopic mass of neutral peptide Mr(calc):** 2270.111374**Fixed modifications:** Carbamidomethyl (C) (apply to specified residues or termini only)**Ions**

**Score:** 81 **Expect:** 1.6e-006**Matches :** 40/212 fragment ions using 85 most intense peaks ([help](#))

| #  | b                  | b <sup>++</sup> | b*                 | b <sup>*++</sup>  | b <sup>0</sup>     | b <sup>0++</sup> | Seq. | y                  | y <sup>++</sup>   | y*                 | y <sup>*++</sup>  | y <sup>0</sup>     |    |
|----|--------------------|-----------------|--------------------|-------------------|--------------------|------------------|------|--------------------|-------------------|--------------------|-------------------|--------------------|----|
| 1  | 102.054955         | 51.531116       |                    |                   | 84.044390          | 42.525833        | T    |                    |                   |                    |                   |                    |    |
| 2  | 201.123369         | 101.065322      |                    |                   | 183.112804         | 92.060040        | V    | 2170.070965        | 1085.539120       | 2153.044416        | 1077.025846       | 2152.060400        | 10 |
| 3  | 272.160483         | 136.583879      |                    |                   | 254.149918         | 127.578597       | A    | 2071.002551        | 1036.004913       | 2053.976002        | 1027.491639       | 2052.991986        | 10 |
| 4  | 329.181947         | 165.094611      |                    |                   | 311.171382         | 156.089329       | G    | 1999.965437        | 1000.486357       | 1982.938888        | 991.973082        | 1981.954872        | 9  |
| 5  | <b>426.234711</b>  | 213.620994      |                    |                   | 408.224146         | 204.615711       | P    | <b>1942.943973</b> | <b>971.975625</b> | 1925.917424        | 963.462350        | 1924.933408        | 9  |
| 6  | 525.303125         | 263.155201      |                    |                   | <b>507.292560</b>  | 254.149918       | V    | <b>1845.891209</b> | 923.449243        | 1828.864660        | 914.935968        | 1827.880644        | 9  |
| 7  | 582.324589         | 291.665933      |                    |                   | <b>564.314024</b>  | 282.660650       | G    | <b>1746.822795</b> | <b>873.915036</b> | <b>1729.796246</b> | <b>865.401761</b> | 1728.812230        | 8  |
| 8  | 639.346053         | 320.176665      |                    |                   | <b>621.335488</b>  | 311.171382       | G    | <b>1689.801331</b> | 845.404304        | 1672.774782        | 836.891029        | 1671.790766        | 8  |
| 9  | 726.378081         | 363.692679      |                    |                   | 708.367516         | 354.687396       | S    | <b>1632.779867</b> | 816.893572        | <b>1615.753318</b> | 808.380297        | 1614.769302        | 8  |
| 10 | 839.462145         | 420.234711      |                    |                   | 821.451580         | 411.229428       | L    | <b>1545.747839</b> | <b>773.377558</b> | 1528.721290        | 764.864283        | 1527.737274        | 7  |
| 11 | 926.494173         | 463.750725      |                    |                   | 908.483608         | 454.745442       | S    | <b>1432.663775</b> | 716.835526        | <b>1415.637226</b> | 708.322251        | <b>1414.653210</b> | 7  |
| 12 | 1025.562587        | 513.284932      |                    |                   | 1007.552022        | 504.279649       | V    | <b>1345.631747</b> | 673.319512        | 1328.605198        | 664.806237        | 1327.621182        | 6  |
| 13 | 1153.621165        | 577.314221      | 1136.594616        | 568.800946        | 1135.610600        | 568.308938       | Q    | <b>1246.563333</b> | 623.785305        | <b>1229.536784</b> | <b>615.272030</b> | <b>1228.552768</b> | 6  |
| 14 | 1313.651814        | 657.329545      | 1296.625265        | 648.816271        | 1295.641249        | 648.324263       | C    | <b>1118.504755</b> | 559.756016        | 1101.478206        | 551.242741        | 1100.494190        | 5  |
| 15 | 1410.704578        | 705.855927      | 1393.678029        | 697.342653        | 1392.694013        | 696.850645       | P    | <b>958.474106</b>  | 479.740691        | 941.447557         | 471.227417        | 940.463541         | 4  |
| 16 | 1573.767907        | 787.387592      | 1556.741358        | 778.874317        | <b>1555.757342</b> | 778.382309       | Y    | <b>861.421342</b>  | 431.214309        | 844.394793         | 422.701035        | 843.410777         | 4  |
| 17 | 1702.810500        | 851.908888      | 1685.783951        | 843.395614        | 1684.799935        | 842.903606       | E    | <b>698.358013</b>  | 349.682645        | 681.331464         | 341.169370        | <b>680.347448</b>  | 3  |
| 18 | <b>1830.905463</b> | 915.956370      | 1813.878914        | 907.443095        | 1812.894898        | 906.951087       | K    | <b>569.315420</b>  | 285.161348        | 552.288871         | 276.648074        | 551.304855         | 2  |
| 19 | <b>1959.948056</b> | 980.477666      | <b>1942.921507</b> | <b>971.964392</b> | <b>1941.937491</b> | 971.472384       | E    | <b>441.220457</b>  | 221.113867        | 424.193908         | 212.600592        | 423.209892         | 2  |

|    |             |             |             |             |             |             |   |            |            |            |            |  |  |
|----|-------------|-------------|-------------|-------------|-------------|-------------|---|------------|------------|------------|------------|--|--|
| 20 | 2097.006968 | 1049.007122 | 2079.980419 | 1040.493847 | 2078.996403 | 1040.001840 | H | 312.177864 | 156.592570 | 295.151315 | 148.079295 |  |  |
| 21 |             |             |             |             |             |             | R | 175.118952 | 88.063114  | 158.092403 | 79.549839  |  |  |

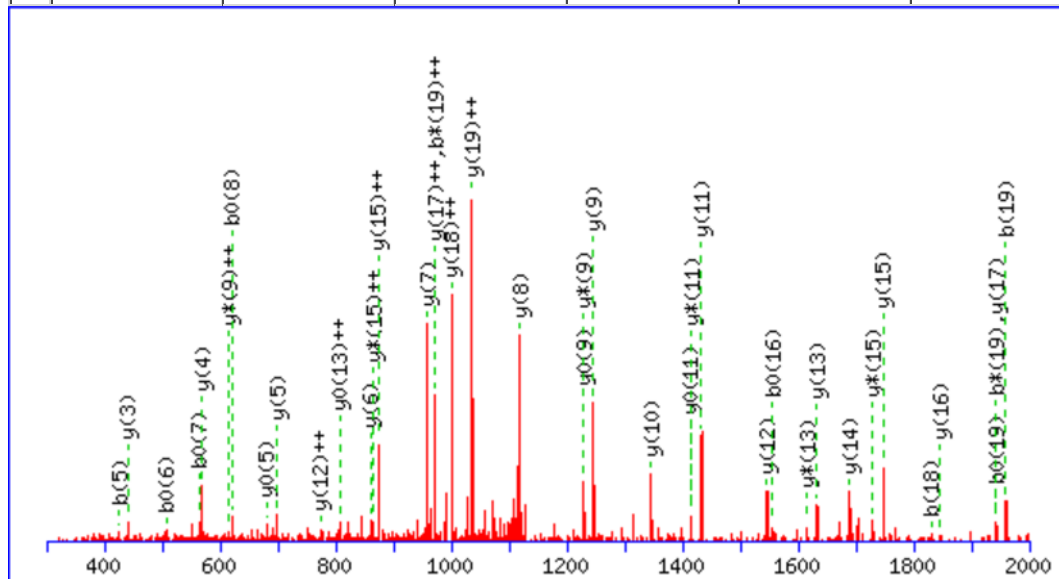

## Peptide View

MS/MS Fragmentation of **DFSLTSSSQTPGATK**

Found in **IPI00291300**, Tax\_Id=9606 Gene\_Symbol=PODXL2 Putative uncharacterized protein PODXL2

**Experiment:** 19 - NOPB1 **Fraction:** NOPB1

Match to Query 9302: 1525.726448 from(763.870500,2+)

Title: OECHL100310\_11.10407.10407.2.dta

Data file \\BOROMIR\Masse\Data LTQ-Orbitrap\Chrystelle Lacroix\Etude clinique sJPU\OECHL100310\_11.raw

**Monoisotopic mass of neutral peptide Mr(calc):** 1525.726028 **Fixed modifications:** Carbamidomethyl (C) (apply to specified residues or termini only) **Ions**

**Score:** 94 **Expect:** 4.1e-008 **Matches :** 34/150 fragment ions using 49 most intense peaks ([help](#))

| # | b                 | b <sup>++</sup> | b <sup>*</sup> | b <sup>*++</sup> | b <sup>0</sup>    | b <sup>0++</sup> | Seq. | y                  | y <sup>++</sup>   | y <sup>*</sup> | y <sup>*++</sup>  | y <sup>0</sup> | y <sup>0++</sup> |
|---|-------------------|-----------------|----------------|------------------|-------------------|------------------|------|--------------------|-------------------|----------------|-------------------|----------------|------------------|
| 1 | 116.034219        | 58.520748       |                |                  | 98.023654         | 49.515465        | D    |                    |                   |                |                   |                |                  |
| 2 | <b>263.102633</b> | 132.054954      |                |                  | 245.092068        | 123.049672       | F    | 1411.706351        | 706.356813        | 1394.679802    | 697.843539        | 1393.695786    | 697.3515         |
| 3 | <b>350.134661</b> | 175.570968      |                |                  | <b>332.124096</b> | 166.565686       | S    | <b>1264.637937</b> | <b>632.822607</b> | 1247.611388    | <b>624.309332</b> | 1246.627372    | <b>623.8173</b>  |

|    |             |            |             |            |             |            |   |             |            |             |            |             |          |
|----|-------------|------------|-------------|------------|-------------|------------|---|-------------|------------|-------------|------------|-------------|----------|
| 4  | 463.218725  | 232.113001 |             |            | 445.208160  | 223.107718 | L | 1177.605909 | 589.306592 | 1160.579360 | 580.793318 | 1159.595344 | 580.3013 |
| 5  | 564.266404  | 282.636840 |             |            | 546.255839  | 273.631558 | T | 1064.521845 | 532.764561 | 1047.495296 | 524.251286 | 1046.511280 | 523.7592 |
| 6  | 651.298432  | 326.152854 |             |            | 633.287867  | 317.147572 | S | 963.474166  | 482.240721 | 946.447617  | 473.727446 | 945.463601  | 473.2354 |
| 7  | 738.330460  | 369.668868 |             |            | 720.319895  | 360.663586 | S | 876.442138  | 438.724707 | 859.415589  | 430.211432 | 858.431573  | 429.7194 |
| 8  | 825.362488  | 413.184882 |             |            | 807.351923  | 404.179599 | S | 789.410110  | 395.208693 | 772.383561  | 386.695418 | 771.399545  | 386.2034 |
| 9  | 953.421066  | 477.214171 | 936.394517  | 468.700897 | 935.410501  | 468.208889 | Q | 702.378082  | 351.692679 | 685.351533  | 343.179404 | 684.367517  | 342.6873 |
| 10 | 1054.468745 | 527.738010 | 1037.442196 | 519.224736 | 1036.458180 | 518.732728 | T | 574.319504  | 287.663390 | 557.292955  | 279.150115 | 556.308939  | 278.6581 |
| 11 | 1151.521509 | 576.264392 | 1134.494960 | 567.751118 | 1133.510944 | 567.259110 | P | 473.271825  | 237.139550 | 456.245276  | 228.626276 | 455.261260  | 228.1342 |
| 12 | 1208.542973 | 604.775124 | 1191.516424 | 596.261850 | 1190.532408 | 595.769842 | G | 376.219061  | 188.613168 | 359.192512  | 180.099894 | 358.208496  | 179.6078 |
| 13 | 1279.580087 | 640.293681 | 1262.553538 | 631.780407 | 1261.569522 | 631.288399 | A | 319.197597  | 160.102436 | 302.171048  | 151.589162 | 301.187032  | 151.0971 |
| 14 | 1380.627766 | 690.817521 | 1363.601217 | 682.304246 | 1362.617201 | 681.812238 | T | 248.160483  | 124.583879 | 231.133934  | 116.070605 | 230.149918  | 115.5785 |
| 15 |             |            |             |            |             |            | K | 147.112804  | 74.060040  | 130.086255  | 65.546765  |             |          |

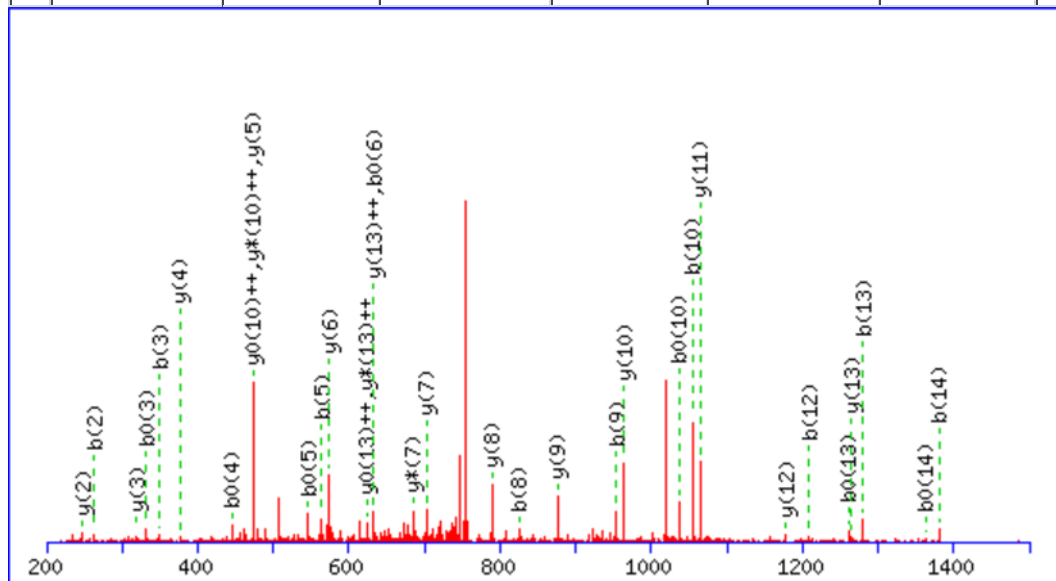

## Peptide View

MS/MS Fragmentation of **YSGSEGSTQTLTKGELK**

Found in **IPI00017526**, Tax\_Id=9606 Gene\_Symbol=S100P Protein S100-P

**Experiment:** 19 - NOPB1 **Fraction:** NOPB1

Match to Query 11533: 1784.881248 from(893.447900,2+)

Title: OECHL100310\_11.7197.7197.2.dta

Data file \\BOROMIR\Masse\Data LTQ-Orbitrap\Chrystelle Lacroix\Etude clinique sJPU\OECHL100310\_11.raw

**Monoisotopic mass of neutral peptide Mr(calc):** 1784.879211 **Fixed modifications:** Carbamidomethyl (C) (apply to specified residues or termini only) **Ions**

**Score:** 75 **Expect:** 5.1e-006 **Matches :** 13/170 fragment ions using 16 most intense peaks ([help](#))

| #  | b           | b <sup>++</sup> | b*          | b* <sup>++</sup> | b <sup>0</sup> | b <sup>0++</sup> | Seq. | y           | y <sup>++</sup> | y*          | y* <sup>++</sup> | y <sup>0</sup> | y <sup>0++</sup> |
|----|-------------|-----------------|-------------|------------------|----------------|------------------|------|-------------|-----------------|-------------|------------------|----------------|------------------|
| 1  | 164.070605  | 82.538940       |             |                  |                |                  | Y    |             |                 |             |                  |                |                  |
| 2  | 251.102633  | 126.054954      |             |                  | 233.092068     | 117.049672       | S    | 1622.823172 | 811.915224      | 1605.796623 | 803.401950       | 1604.812607    | 802.9099         |
| 3  | 308.124097  | 154.565687      |             |                  | 290.113532     | 145.560404       | G    | 1535.791144 | 768.399210      | 1518.764595 | 759.885936       | 1517.780579    | 759.3939         |
| 4  | 395.156125  | 198.081701      |             |                  | 377.145560     | 189.076418       | S    | 1478.769680 | 739.888478      | 1461.743131 | 731.375204       | 1460.759115    | 730.8831         |
| 5  | 524.198718  | 262.602997      |             |                  | 506.188153     | 253.597715       | E    | 1391.737652 | 696.372464      | 1374.711103 | 687.859190       | 1373.727087    | 687.3671         |
| 6  | 581.220182  | 291.113729      |             |                  | 563.209617     | 282.108447       | G    | 1262.695059 | 631.851167      | 1245.668510 | 623.337893       | 1244.684494    | 622.8458         |
| 7  | 668.252210  | 334.629743      |             |                  | 650.241645     | 325.624461       | S    | 1205.673595 | 603.340436      | 1188.647046 | 594.827161       | 1187.663030    | 594.3351         |
| 8  | 769.299889  | 385.153583      |             |                  | 751.289324     | 376.148300       | T    | 1118.641567 | 559.824421      | 1101.615018 | 551.311147       | 1100.631002    | 550.8191         |
| 9  | 897.358467  | 449.182872      | 880.331918  | 440.669597       | 879.347902     | 440.177589       | Q    | 1017.593888 | 509.300582      | 1000.567339 | 500.787307       | 999.583323     | 500.2952         |
| 10 | 998.406146  | 499.706711      | 981.379597  | 491.193437       | 980.395581     | 490.701429       | T    | 889.535310  | 445.271293      | 872.508761  | 436.758018       | 871.524745     | 436.2660         |
| 11 | 1111.490210 | 556.248743      | 1094.463661 | 547.735469       | 1093.479645    | 547.243461       | L    | 788.487631  | 394.747453      | 771.461082  | 386.234179       | 770.477066     | 385.7421         |
| 12 | 1212.537889 | 606.772583      | 1195.511340 | 598.259308       | 1194.527324    | 597.767300       | T    | 675.403567  | 338.205421      | 658.377018  | 329.692147       | 657.393002     | 329.2001         |
| 13 | 1340.632852 | 670.820064      | 1323.606303 | 662.306790       | 1322.622287    | 661.814782       | K    | 574.355888  | 287.681582      | 557.329339  | 279.168307       | 556.345323     | 278.6762         |
| 14 | 1397.654316 | 699.330796      | 1380.627767 | 690.817522       | 1379.643751    | 690.325514       | G    | 446.260925  | 223.634100      | 429.234376  | 215.120826       | 428.250360     | 214.6288         |
| 15 | 1526.696909 | 763.852093      | 1509.670360 | 755.338818       | 1508.686344    | 754.846810       | E    | 389.239461  | 195.123368      | 372.212912  | 186.610094       | 371.228896     | 186.1180         |
| 16 | 1639.780973 | 820.394124      | 1622.754424 | 811.880850       | 1621.770408    | 811.388842       | L    | 260.196868  | 130.602072      | 243.170319  | 122.088797       |                |                  |
| 17 |             |                 |             |                  |                |                  | K    | 147.112804  | 74.060040       | 130.086255  | 65.546765        |                |                  |

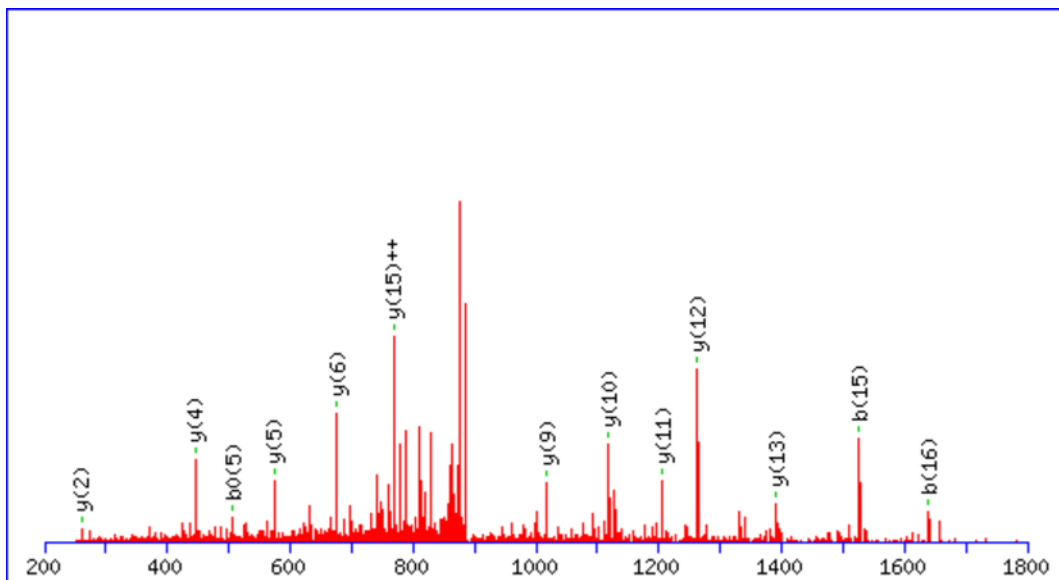

## Peptide View

MS/MS Fragmentation of **ITCAEEGWSPTPK**

Found in **IPI00006154**, Tax\_Id=9606 Gene\_Symbol=CFHR2 Isoform Long of Complement factor H-related protein 2

**Experiment:** 19 - NOPB1 **Fraction:** NOPB1

Match to Query 8790: 1474.677248 from(738.345900,2+)

Title: OECHL100310\_11.9756.9756.2.dta

Data file \\BOROMIR\Masse\Data LTQ-Orbitrap\Chrystelle Lacroix\Etude clinique sJPU\OECHL100310\_11.raw

**Monoisotopic mass of neutral peptide Mr(calc):** 1474.676224 **Fixed modifications:** Carbamidomethyl (C) (apply to specified residues or termini only) **Ions**

**Score:** 79 **Expect:** 1.4e-006 **Matches :** 26/114 fragment ions using 37 most intense peaks ([help](#))

| # | b                 | b <sup>++</sup> | b <sup>0</sup>    | b <sup>0++</sup> | Seq. | y                  | y <sup>++</sup>   | y*          | y <sup>*++</sup> | y <sup>0</sup> | y <sup>0++</sup> | #  |
|---|-------------------|-----------------|-------------------|------------------|------|--------------------|-------------------|-------------|------------------|----------------|------------------|----|
| 1 | 114.091340        | 57.549308       |                   |                  | I    |                    |                   |             |                  |                |                  | 13 |
| 2 | 215.139019        | 108.073147      | 197.128454        | 99.067865        | T    | <b>1362.599444</b> | <b>681.803360</b> | 1345.572895 | 673.290086       | 1344.588879    | 672.798078       | 12 |
| 3 | 375.169668        | 188.088472      | <b>357.159103</b> | 179.083190       | C    | <b>1261.551765</b> | <b>631.279521</b> | 1244.525216 | 622.766246       | 1243.541200    | 622.274238       | 11 |
| 4 | <b>446.206782</b> | 223.607029      | 428.196217        | 214.601747       | A    | <b>1101.521116</b> | 551.264196        | 1084.494567 | 542.750922       | 1083.510551    | 542.258914       | 10 |
| 5 | <b>575.249375</b> | 288.128326      | 557.238810        | 279.123043       | E    | <b>1030.484002</b> | 515.745639        | 1013.457453 | 507.232365       | 1012.473437    | 506.740357       | 9  |

|    |             |            |             |            |   |            |            |            |            |            |            |   |
|----|-------------|------------|-------------|------------|---|------------|------------|------------|------------|------------|------------|---|
| 6  | 704.291968  | 352.649622 | 686.281403  | 343.644340 | E | 901.441409 | 451.224343 | 884.414860 | 442.711068 | 883.430844 | 442.219060 | 8 |
| 7  | 761.313432  | 381.160354 | 743.302867  | 372.155072 | G | 772.398816 | 386.703046 | 755.372267 | 378.189772 | 754.388251 | 377.697764 | 7 |
| 8  | 947.392745  | 474.200011 | 929.382180  | 465.194728 | W | 715.377352 | 358.192314 | 698.350803 | 349.679040 | 697.366787 | 349.187032 | 6 |
| 9  | 1034.424773 | 517.716025 | 1016.414208 | 508.710742 | S | 529.298039 | 265.152658 | 512.271490 | 256.639383 | 511.287474 | 256.147375 | 5 |
| 10 | 1131.477537 | 566.242407 | 1113.466972 | 557.237124 | P | 442.266011 | 221.636644 | 425.239462 | 213.123369 | 424.255446 | 212.631361 | 4 |
| 11 | 1232.525216 | 616.766246 | 1214.514651 | 607.760964 | T | 345.213247 | 173.110262 | 328.186698 | 164.596987 | 327.202682 | 164.104979 | 3 |
| 12 | 1329.577980 | 665.292628 | 1311.567415 | 656.287346 | P | 244.165568 | 122.586422 | 227.139019 | 114.073148 |            |            | 2 |
| 13 |             |            |             |            | K | 147.112804 | 74.060040  | 130.086255 | 65.546765  |            |            | 1 |

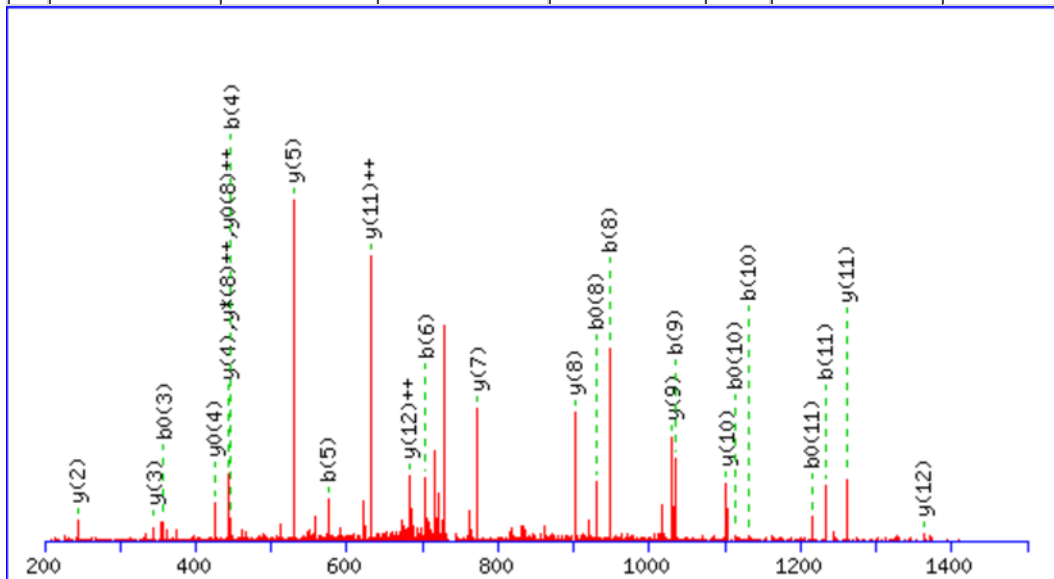

## Peptide View

MS/MS Fragmentation of **CQCPAGAALQADGR**

Found in **IPI00010737**, Tax\_Id=9606 Gene\_Symbol=THBD Thrombomodulin

**Experiment:** 19 - NOPB1 **Fraction:** NOPB1

Match to Query 8770: 1473.646048 from(737.830300,2+)

Title: OECHL100310\_11.7122.7122.2.dta



Data file \\BOROMIR\Masse\Data LTQ-Orbitrap\Chrystelle Lacroix\Etude clinique sJPU\OECHL100310\_11.raw

**Monoisotopic mass of neutral peptide Mr(calc):** 1473.645279**Fixed modifications:** Carbamidomethyl (C) (apply to specified residues or termini only)**Ions****Score:** 86 **Expect:** 1.4e-007**Matches :** 25/128 fragment ions using 38 most intense peaks ([help](#))

| #  | b                  | b <sup>++</sup> | b*                | b* <sup>++</sup> | b <sup>0</sup> | b <sup>0++</sup> | Seq. | y                  | y <sup>++</sup>   | y*                 | y* <sup>++</sup> | y <sup>0</sup> | y <sup>0++</sup> |
|----|--------------------|-----------------|-------------------|------------------|----------------|------------------|------|--------------------|-------------------|--------------------|------------------|----------------|------------------|
| 1  | 161.037925         | 81.022600       |                   |                  |                |                  | C    |                    |                   |                    |                  |                |                  |
| 2  | <b>289.096503</b>  | 145.051890      | <b>272.069954</b> | 136.538615       |                |                  | Q    | 1314.621912        | 657.814594        | 1297.595363        | 649.301320       | 1296.611347    | 648.8093         |
| 3  | <b>449.127152</b>  | 225.067214      | 432.100603        | 216.553940       |                |                  | C    | <b>1186.563334</b> | <b>593.785305</b> | 1169.536785        | 585.272031       | 1168.552769    | 584.7800         |
| 4  | <b>546.179916</b>  | 273.593596      | 529.153367        | 265.080322       |                |                  | P    | <b>1026.532685</b> | 513.769981        | <b>1009.506136</b> | 505.256706       | 1008.522120    | 504.7646         |
| 5  | <b>617.217030</b>  | 309.112153      | <b>600.190481</b> | 300.598879       |                |                  | A    | <b>929.479921</b>  | 465.243599        | 912.453372         | 456.730324       | 911.469356     | 456.2383         |
| 6  | <b>674.238494</b>  | 337.622885      | 657.211945        | 329.109611       |                |                  | G    | <b>858.442807</b>  | 429.725042        | 841.416258         | 421.211767       | 840.432242     | 420.7197         |
| 7  | 745.275608         | 373.141442      | 728.249059        | 364.628168       |                |                  | A    | 801.421343         | 401.214310        | 784.394794         | 392.701035       | 783.410778     | 392.2090         |
| 8  | <b>816.312722</b>  | 408.659999      | 799.286173        | 400.146725       |                |                  | A    | <b>730.384229</b>  | 365.695753        | 713.357680         | 357.182478       | 712.373664     | 356.6904         |
| 9  | <b>929.396786</b>  | 465.202031      | 912.370237        | 456.688757       |                |                  | L    | <b>659.347115</b>  | 330.177196        | 642.320566         | 321.663921       | 641.336550     | 321.1719         |
| 10 | <b>1057.455364</b> | 529.231320      | 1040.428815       | 520.718046       |                |                  | Q    | <b>546.263051</b>  | 273.635164        | 529.236502         | 265.121889       | 528.252486     | 264.6298         |
| 11 | <b>1128.492478</b> | 564.749877      | 1111.465929       | 556.236603       |                |                  | A    | <b>418.204473</b>  | 209.605874        | 401.177924         | 201.092600       | 400.193908     | 200.6005         |
| 12 | <b>1243.519421</b> | 622.263349      | 1226.492872       | 613.750074       | 1225.508856    | 613.258066       | D    | <b>347.167359</b>  | 174.087317        | 330.140810         | 165.574043       | 329.156794     | 165.0820         |
| 13 | <b>1300.540885</b> | 650.774081      | 1283.514336       | 642.260806       | 1282.530320    | 641.768798       | G    | <b>232.140416</b>  | 116.573846        | 215.113867         | 108.060571       |                |                  |
| 14 |                    |                 |                   |                  |                |                  | R    | 175.118952         | 88.063114         | 158.092403         | 79.549839        |                |                  |

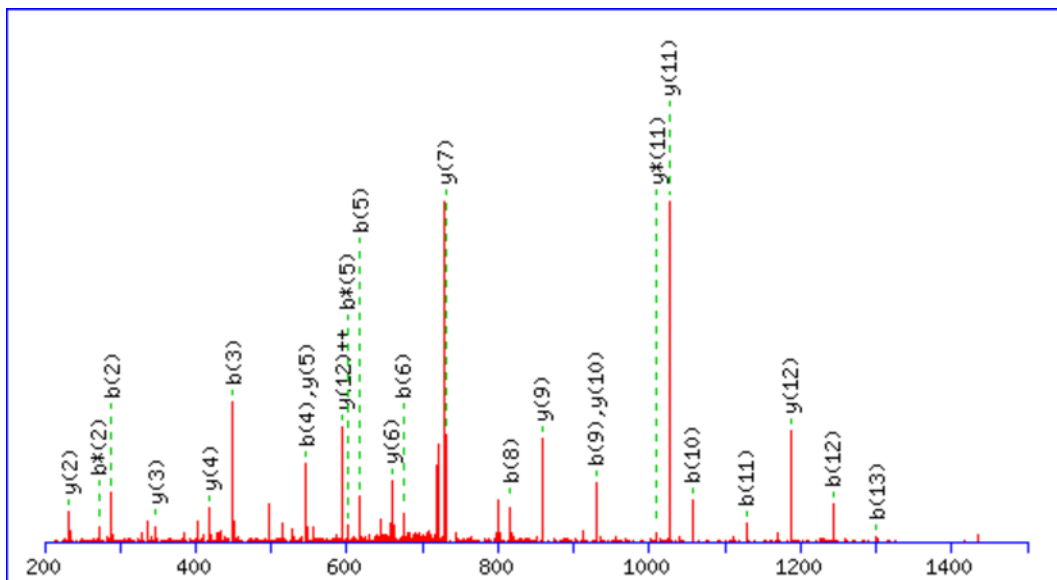

## Peptide View

MS/MS Fragmentation of **VAAGAFQGLR**

Found in **IPI00022417**, Tax\_Id=9606 Gene\_Symbol=LRG1 Leucine-rich alpha-2-glycoprotein

**Experiment:** 19 - NOPB1 **Fraction:** NOPB1

Match to Query 2410: 988.545448 from(495.280000,2+)

Title: OECHL100310\_11.10764.10764.2.dta

Data file \\BOROMIR\Masse\Data LTQ-Orbitrap\Chrystelle Lacroix\Etude clinique sJPU\OECHL100310\_11.raw

**Monoisotopic mass of neutral peptide Mr(calc):** 988.545410 **Fixed modifications:** Carbamidomethyl (C) (apply to specified residues or termini only) **Ions Score:**

66 **Expect:** 1.9e-005 **Matches :** 16/60 fragment ions using 27 most intense peaks ([help](#))

| # | b                 | b <sup>++</sup> | b* | b <sup>*++</sup> | Seq. | y                 | y <sup>++</sup>   | y*         | y <sup>*++</sup>  | #  |
|---|-------------------|-----------------|----|------------------|------|-------------------|-------------------|------------|-------------------|----|
| 1 | 100.075690        | 50.541483       |    |                  | V    |                   |                   |            |                   | 10 |
| 2 | <b>171.112804</b> | 86.060040       |    |                  | A    | <b>890.484278</b> | <b>445.745777</b> | 873.457729 | <b>437.232503</b> | 9  |
| 3 | <b>242.149918</b> | 121.578597      |    |                  | A    | <b>819.447164</b> | <b>410.227220</b> | 802.420615 | 401.713946        | 8  |
| 4 | 299.171382        | 150.089329      |    |                  | G    | <b>748.410050</b> | 374.708663        | 731.383501 | 366.195389        | 7  |
| 5 | <b>370.208496</b> | 185.607886      |    |                  | A    | <b>691.388586</b> | 346.197931        | 674.362037 | 337.684657        | 6  |

|    |            |            |            |            |   |            |            |            |            |   |
|----|------------|------------|------------|------------|---|------------|------------|------------|------------|---|
| 6  | 517.276910 | 259.142093 |            |            | F | 620.351472 | 310.679374 | 603.324923 | 302.166100 | 5 |
| 7  | 645.335488 | 323.171382 | 628.308939 | 314.658108 | Q | 473.283058 | 237.145167 | 456.256509 | 228.631893 | 4 |
| 8  | 702.356952 | 351.682114 | 685.330403 | 343.168840 | G | 345.224480 | 173.115878 | 328.197931 | 164.602604 | 3 |
| 9  | 815.441016 | 408.224146 | 798.414467 | 399.710872 | L | 288.203016 | 144.605146 | 271.176467 | 136.091872 | 2 |
| 10 |            |            |            |            | R | 175.118952 | 88.063114  | 158.092403 | 79.549840  | 1 |

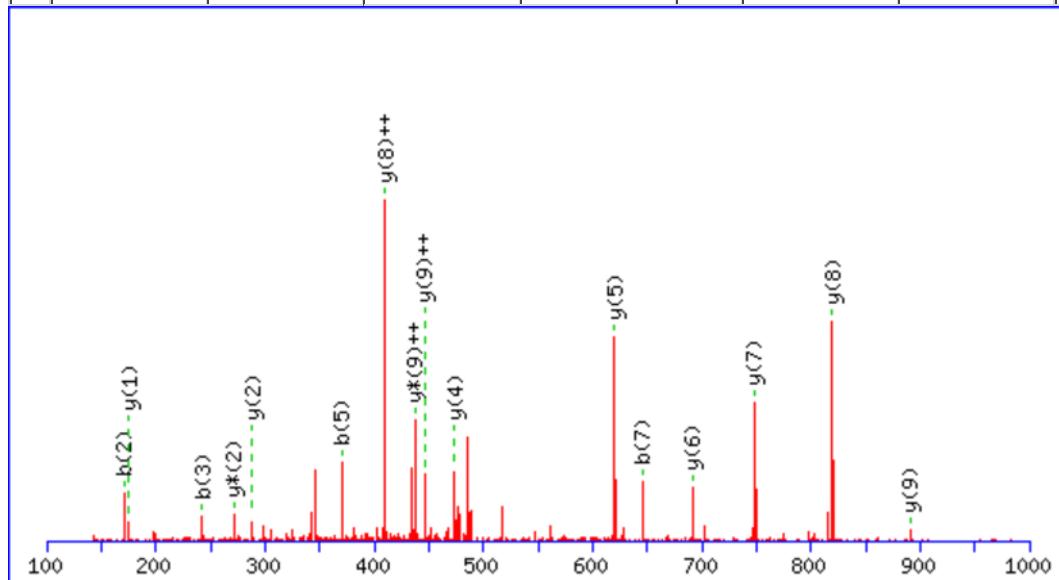

## Peptide View

MS/MS Fragmentation of **AHQESAIFNEVAPGYFSR**

Found in **IPI00170635**, Tax\_Id=9606 Gene\_Symbol=SECTM1 Secreted and transmembrane protein 1

Experiment: 19 - NOPB1 Fraction: NOPB1

Match to Query 13046: 2078.987448 from(1040.501000,2+)

Title: OECHL100310\_11.16532.16532.2.dta

Data file \\BOROMIR\Masse\Data LTQ-Orbitrap\Chrystelle Lacroix\Etude clinique sJPU\OECHL100310\_11.raw

**Monoisotopic mass of neutral peptide Mr(calc):** 2078.980988**Fixed modifications:** Carbamidomethyl (C) (apply to specified residues or termini only)**Ions**

**Score:** 102 **Expect:** 9.9e-009**Matches :** 40/200 fragment ions using 66 most intense peaks ([help](#))

| # | b | b <sup>++</sup> | b* | b <sup>*++</sup> | b <sup>0</sup> | b <sup>0++</sup> | Seq. | y | y <sup>++</sup> | y* | y <sup>*++</sup> | y <sup>0</sup> | y <sup>0++</sup> |
|---|---|-----------------|----|------------------|----------------|------------------|------|---|-----------------|----|------------------|----------------|------------------|
|---|---|-----------------|----|------------------|----------------|------------------|------|---|-----------------|----|------------------|----------------|------------------|



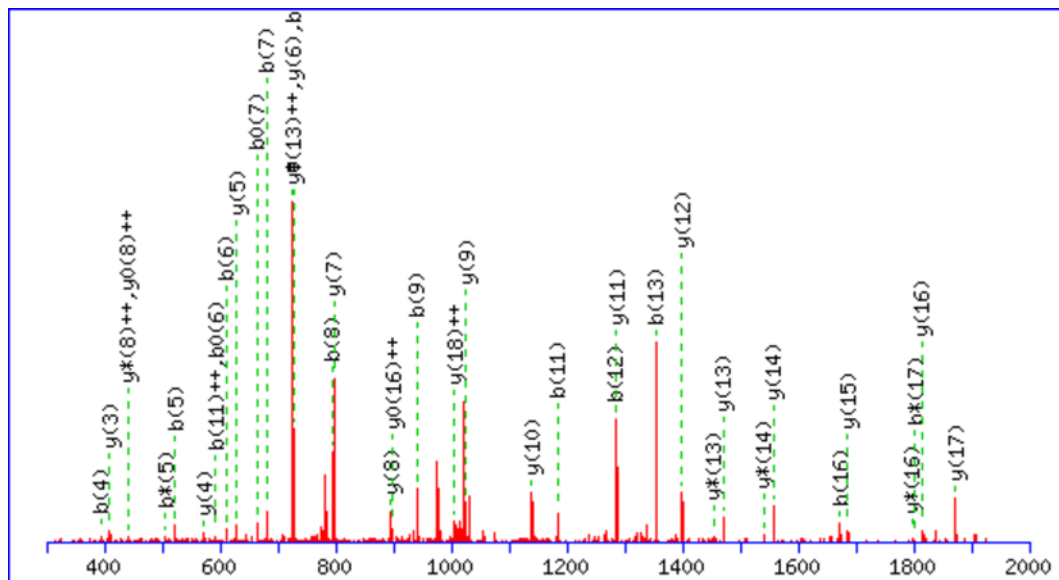

## Peptide View

MS/MS Fragmentation of **NPVLQQDAHSSVTITPQR**

Found in **IPI00410488**, Tax\_Id=9606 Gene\_Symbol=CD276 Isoform 1 of CD276 antigen

**Experiment:** 19 - NOPB1 **Fraction:** NOPB1

Match to Query 12690: 1990.022248 from(996.018400,2+)

Title: OECHL100310\_11.9321.9321.2.dta

Data file \\BOROMIR\Masse\Data LTQ-Orbitrap\Chrystelle Lacroix\Etude clinique sJPU\OECHL100310\_11.raw

**Monoisotopic mass of neutral peptide Mr(calc):** 1990.023209 **Fixed modifications:** Carbamidomethyl (C) (apply to specified residues or termini only) **Ions**

**Score:** 91 **Expect:** 1.1e-007 **Matches :** 35/186 fragment ions using 65 most intense peaks ([help](#))

| # | b                 | b <sup>++</sup> | b <sup>*</sup>    | b <sup>*++</sup> | b <sup>0</sup> | b <sup>0++</sup> | Seq. | y                  | y <sup>++</sup>   | y <sup>*</sup> | y <sup>*++</sup>  | y <sup>0</sup>     | y <sup>0++</sup> |
|---|-------------------|-----------------|-------------------|------------------|----------------|------------------|------|--------------------|-------------------|----------------|-------------------|--------------------|------------------|
| 1 | 115.050203        | 58.028740       | 98.023654         | 49.515465        |                |                  | N    |                    |                   |                |                   |                    |                  |
| 2 | 212.102967        | 106.555121      | 195.076418        | 98.041847        |                |                  | P    | 1876.987553        | 938.997415        | 1859.961004    | 930.484140        | 1858.976988        | 929.9921         |
| 3 | <b>311.171381</b> | 156.089328      | 294.144832        | 147.576054       |                |                  | V    | <b>1779.934789</b> | <b>890.471033</b> | 1762.908240    | 881.957758        | 1761.924224        | 881.4657         |
| 4 | 424.255445        | 212.631361      | 407.228896        | 204.118086       |                |                  | L    | <b>1680.866375</b> | <b>840.936826</b> | 1663.839826    | 832.423551        | <b>1662.855810</b> | 831.9315         |
| 5 | <b>552.314023</b> | 276.660650      | <b>535.287474</b> | 268.147375       |                |                  | Q    | <b>1567.782311</b> | 784.394794        | 1550.755762    | <b>775.881519</b> | 1549.771746        | <b>775.3895</b>  |

|    |                    |                   |                    |            |                    |            |   |                    |            |             |            |             |          |
|----|--------------------|-------------------|--------------------|------------|--------------------|------------|---|--------------------|------------|-------------|------------|-------------|----------|
| 6  | 680.372601         | 340.689939        | 663.346052         | 332.176664 |                    |            | Q | <b>1439.723733</b> | 720.365505 | 1422.697184 | 711.852230 | 1421.713168 | 711.3602 |
| 7  | <b>795.399544</b>  | 398.203410        | 778.372995         | 389.690136 | 777.388979         | 389.198128 | D | <b>1311.665155</b> | 656.336215 | 1294.638606 | 647.822941 | 1293.654590 | 647.3309 |
| 8  | 866.436658         | 433.721967        | 849.410109         | 425.208693 | 848.426093         | 424.716685 | A | <b>1196.638212</b> | 598.822744 | 1179.611663 | 590.309470 | 1178.627647 | 589.8174 |
| 9  | 1003.495570        | <b>502.251423</b> | 986.469021         | 493.738149 | 985.485005         | 493.246141 | H | <b>1125.601098</b> | 563.304187 | 1108.574549 | 554.790913 | 1107.590533 | 554.2989 |
| 10 | <b>1090.527598</b> | 545.767437        | 1073.501049        | 537.254163 | 1072.517033        | 536.762155 | S | <b>988.542186</b>  | 494.774731 | 971.515637  | 486.261457 | 970.531621  | 485.7694 |
| 11 | 1177.559626        | 589.283451        | 1160.533077        | 580.770177 | 1159.549061        | 580.278169 | S | <b>901.510158</b>  | 451.258717 | 884.483609  | 442.745443 | 883.499593  | 442.2534 |
| 12 | <b>1276.628040</b> | 638.817658        | 1259.601491        | 630.304384 | <b>1258.617475</b> | 629.812376 | V | <b>814.478130</b>  | 407.742703 | 797.451581  | 399.229428 | 796.467565  | 398.7374 |
| 13 | 1377.675719        | 689.341498        | 1360.649170        | 680.828223 | 1359.665154        | 680.336215 | T | <b>715.409716</b>  | 358.208496 | 698.383167  | 349.695221 | 697.399151  | 349.2032 |
| 14 | <b>1490.759783</b> | 745.883530        | <b>1473.733234</b> | 737.370255 | <b>1472.749218</b> | 736.878247 | I | <b>614.362037</b>  | 307.684656 | 597.335488  | 299.171382 | 596.351472  | 298.6793 |
| 15 | <b>1591.807462</b> | 796.407369        | <b>1574.780913</b> | 787.894095 | 1573.796897        | 787.402087 | T | <b>501.277973</b>  | 251.142624 | 484.251424  | 242.629350 | 483.267408  | 242.1373 |
| 16 | 1688.860226        | 844.933751        | 1671.833677        | 836.420477 | 1670.849661        | 835.928469 | P | <b>400.230294</b>  | 200.618785 | 383.203745  | 192.105510 |             |          |
| 17 | <b>1816.918804</b> | 908.963040        | 1799.892255        | 900.449766 | 1798.908239        | 899.957758 | Q | 303.177530         | 152.092403 | 286.150981  | 143.579128 |             |          |
| 18 |                    |                   |                    |            |                    |            | R | 175.118952         | 88.063114  | 158.092403  | 79.549839  |             |          |

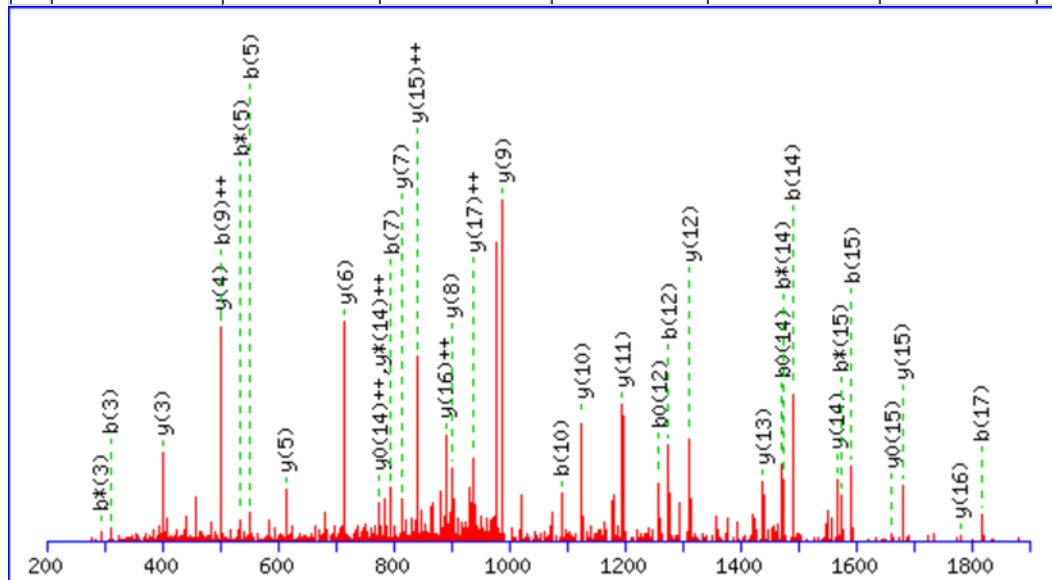

## Peptide View

MS/MS Fragmentation of **SQKIDYGVFAK**Found in **IPI00020990**, Tax\_Id=9606 Gene\_Symbol=OMD Osteomodulin**Experiment:** 19 - NOPB1 **Fraction:** NOPB1

Match to Query 6337: 1254.660848 from(628.337700,2+)

Title: OECHL100310\_11.10912.10912.2.dta

Data file \\BOROMIR\Masse\Data LTQ-Orbitrap\Chrystelle Lacroix\Etude clinique sJPU\OECHL100310\_11.raw

**Monoisotopic mass of neutral peptide Mr(calc):** 1254.660828**Fixed modifications:** Carbamidomethyl (C) (apply to specified residues or termini only)**Ions****Score:** 54 **Expect:** 0.00035**Matches :** 10/106 fragment ions using 11 most intense peaks ([help](#))

| #  | b                  | b <sup>++</sup> | b*          | b <sup>*++</sup> | b <sup>0</sup> | b <sup>0++</sup> | Seq. | y                  | y <sup>++</sup>   | y*          | y <sup>*++</sup> | y <sup>0</sup> | y <sup>0++</sup> |
|----|--------------------|-----------------|-------------|------------------|----------------|------------------|------|--------------------|-------------------|-------------|------------------|----------------|------------------|
| 1  | 88.039304          | 44.523290       |             |                  | 70.028739      | 35.518008        | S    |                    |                   |             |                  |                |                  |
| 2  | <b>216.097882</b>  | 108.552579      | 199.071333  | 100.039305       | 198.087317     | 99.547296        | Q    | 1168.636087        | 584.821682        | 1151.609538 | 576.308407       | 1150.625522    | 575.8163         |
| 3  | 344.192845         | 172.600060      | 327.166296  | 164.086786       | 326.182280     | 163.594778       | K    | <b>1040.577509</b> | <b>520.792393</b> | 1023.550960 | 512.279118       | 1022.566944    | 511.7871         |
| 4  | <b>457.276909</b>  | 229.142092      | 440.250360  | 220.628818       | 439.266344     | 220.136810       | I    | <b>912.482546</b>  | 456.744911        | 895.455997  | 448.231637       | 894.471981     | 447.7396         |
| 5  | 572.303852         | 286.655564      | 555.277303  | 278.142290       | 554.293287     | 277.650282       | D    | <b>799.398482</b>  | 400.202879        | 782.371933  | 391.689605       | 781.387917     | 391.1975         |
| 6  | 735.367181         | 368.187229      | 718.340632  | 359.673954       | 717.356616     | 359.181946       | Y    | <b>684.371539</b>  | 342.689408        | 667.344990  | 334.176133       |                |                  |
| 7  | 792.388645         | 396.697961      | 775.362096  | 388.184686       | 774.378080     | 387.692678       | G    | <b>521.308210</b>  | 261.157743        | 504.281661  | 252.644469       |                |                  |
| 8  | 891.457059         | 446.232168      | 874.430510  | 437.718893       | 873.446494     | 437.226885       | V    | 464.286746         | 232.647011        | 447.260197  | 224.133737       |                |                  |
| 9  | 1038.525473        | 519.766375      | 1021.498924 | 511.253100       | 1020.514908    | 510.761092       | F    | <b>365.218332</b>  | 183.112804        | 348.191783  | 174.599530       |                |                  |
| 10 | <b>1109.562587</b> | 555.284932      | 1092.536038 | 546.771657       | 1091.552022    | 546.279649       | A    | 218.149918         | 109.578597        | 201.123369  | 101.065322       |                |                  |
| 11 |                    |                 |             |                  |                |                  | K    | 147.112804         | 74.060040         | 130.086255  | 65.546765        |                |                  |

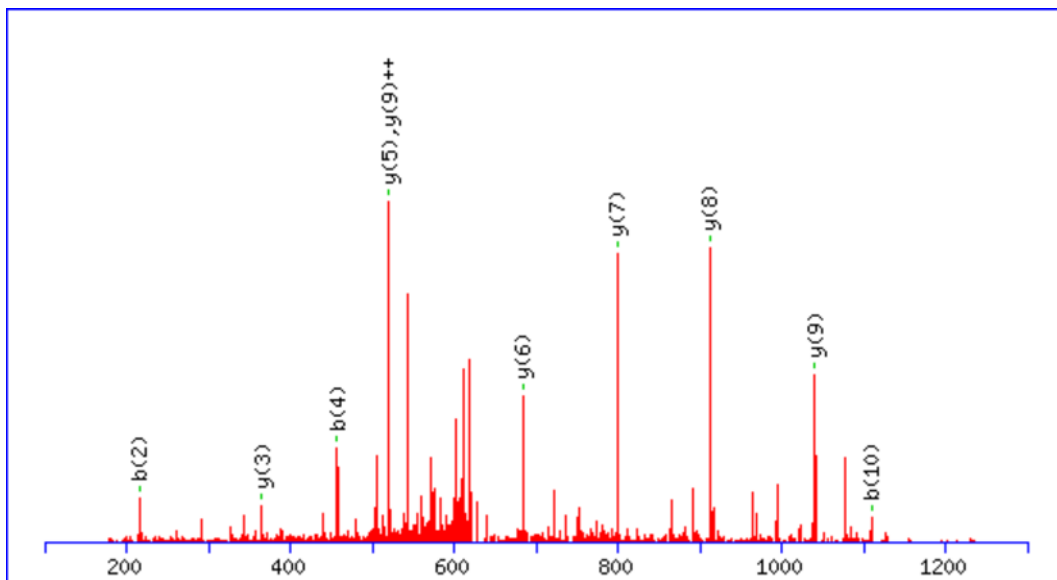

## Peptide View

MS/MS Fragmentation of **ATLLEEQLPLGK**

Found in **IPI00414542**, Tax\_Id=9606 Gene\_Symbol=PDCD1LG2 Isoform 1 of Programmed cell death 1 ligand 2

**Experiment:** 19 - NOPB1 **Fraction:** NOPB1

Match to Query 7145: 1310.745048 from(656.379800,2+)

Title: OECHL100310\_11.16403.16403.2.dta

Data file \\BOROMIR\Masse\Data LTQ-Orbitrap\Chrystelle Lacroix\Etude clinique sJPU\OECHL100310\_11.raw

**Monoisotopic mass of neutral peptide Mr(calc):** 1310.744537 **Fixed modifications:** Carbamidomethyl (C) (apply to specified residues or termini only) **Ions**

**Score:** 55 **Expect:** 0.00013 **Matches :** 25/106 fragment ions using 45 most intense peaks ([help](#))

| # | b                 | b <sup>++</sup> | b <sup>*</sup> | b <sup>*++</sup> | b <sup>0</sup>    | b <sup>0++</sup> | Seq. | y                  | y <sup>++</sup>   | y <sup>*</sup> | y <sup>*++</sup> | y <sup>0</sup>     | y <sup>0++</sup> |
|---|-------------------|-----------------|----------------|------------------|-------------------|------------------|------|--------------------|-------------------|----------------|------------------|--------------------|------------------|
| 1 | 72.044390         | 36.525833       |                |                  |                   |                  | A    |                    |                   |                |                  |                    |                  |
| 2 | 173.092069        | 87.049672       |                |                  | 155.081504        | 78.044390        | T    | <b>1240.714731</b> | 620.861004        | 1223.688182    | 612.347729       | 1222.704166        | 611.8557         |
| 3 | <b>286.176133</b> | 143.591704      |                |                  | <b>268.165568</b> | 134.586422       | L    | <b>1139.667052</b> | <b>570.337164</b> | 1122.640503    | 561.823890       | 1121.656487        | 561.3318         |
| 4 | <b>399.260197</b> | 200.133737      |                |                  | 381.249632        | 191.128454       | L    | <b>1026.582988</b> | 513.795132        | 1009.556439    | 505.281858       | <b>1008.572423</b> | 504.7898         |
| 5 | <b>528.302790</b> | 264.655033      |                |                  | 510.292225        | 255.649751       | E    | <b>913.498924</b>  | 457.253100        | 896.472375     | 448.739825       | 895.488359         | 448.2478         |



|    |             |            |             |            |             |            |   |            |            |            |            |            |          |
|----|-------------|------------|-------------|------------|-------------|------------|---|------------|------------|------------|------------|------------|----------|
| 6  | 657.345383  | 329.176330 |             |            | 639.334818  | 320.171047 | E | 784.456331 | 392.731804 | 767.429782 | 384.218529 | 766.445766 | 383.7265 |
| 7  | 785.403961  | 393.205619 | 768.377412  | 384.692344 | 767.393396  | 384.200336 | Q | 655.413738 | 328.210507 | 638.387189 | 319.697232 |            |          |
| 8  | 898.488025  | 449.747651 | 881.461476  | 441.234376 | 880.477460  | 440.742368 | L | 527.355160 | 264.181218 | 510.328611 | 255.667943 |            |          |
| 9  | 995.540789  | 498.274033 | 978.514240  | 489.760758 | 977.530224  | 489.268750 | P | 414.271096 | 207.639186 | 397.244547 | 199.125911 |            |          |
| 10 | 1108.624853 | 554.816065 | 1091.598304 | 546.302790 | 1090.614288 | 545.810782 | L | 317.218332 | 159.112804 | 300.191783 | 150.599529 |            |          |
| 11 | 1165.646317 | 583.326797 | 1148.619768 | 574.813522 | 1147.635752 | 574.321514 | G | 204.134268 | 102.570772 | 187.107719 | 94.057497  |            |          |
| 12 |             |            |             |            |             |            | K | 147.112804 | 74.060040  | 130.086255 | 65.546765  |            |          |

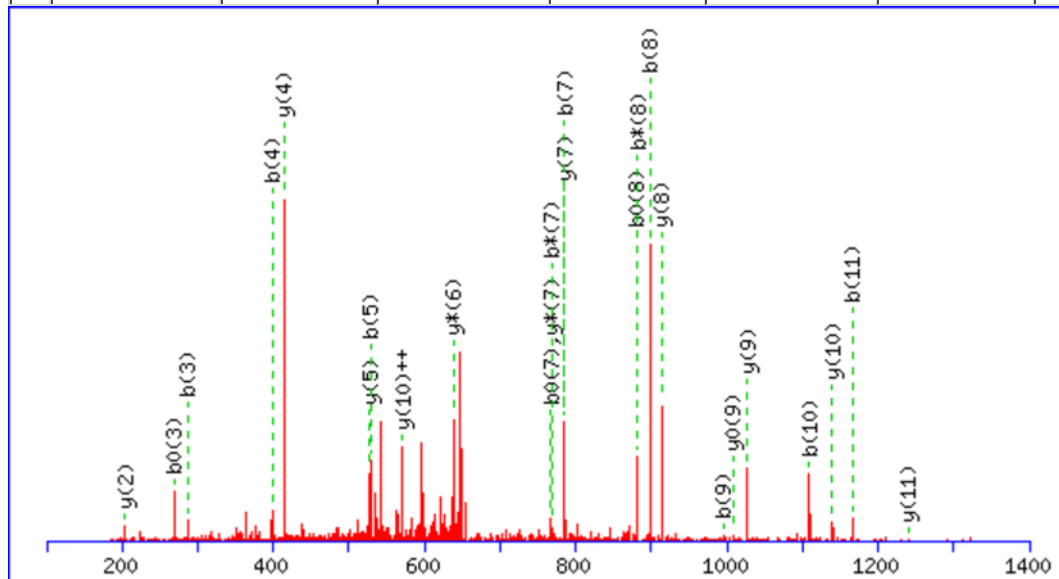

## Peptide View

MS/MS Fragmentation of **VLGIVVQNTK**

Found in **IPI00397949**, Tax\_Id=9606 Gene\_Symbol=GPR56 Isoform 2 of G-protein coupled receptor 56

**Experiment:** 19 - NOPB1 **Fraction:** NOPB1

Match to Query 3619: 1069.649248 from(535.831900,2+)

Title: OECHL100310\_11.11186.11186.2.dta

Data file \\BOROMIR\Masse\Data LTQ-Orbitrap\Chrystelle Lacroix\Etude clinique sJPU\OECHL100310\_11.raw

**Monoisotopic mass of neutral peptide Mr(calc):** 1069.649551 **Fixed modifications:** Carbamidomethyl (C) (apply to specified residues or termini only) **Ions**

Score: 59 Expect: 3.6e-005 Matches : 15/78 fragment ions using 27 most intense peaks ([help](#))

| #  | b                 | b <sup>++</sup>   | b*         | b <sup>*++</sup> | b <sup>0</sup> | b <sup>0++</sup> | Seq. | y                 | y <sup>++</sup> | y*         | y <sup>*++</sup> | y <sup>0</sup> | y <sup>0++</sup> | #  |
|----|-------------------|-------------------|------------|------------------|----------------|------------------|------|-------------------|-----------------|------------|------------------|----------------|------------------|----|
| 1  | 100.075690        | 50.541483         |            |                  |                |                  | V    |                   |                 |            |                  |                |                  | 10 |
| 2  | <b>213.159754</b> | 107.083515        |            |                  |                |                  | L    | <b>971.588408</b> | 486.297842      | 954.561859 | 477.784568       | 953.577843     | 477.292560       | 9  |
| 3  | <b>270.181218</b> | 135.594247        |            |                  |                |                  | G    | <b>858.504344</b> | 429.755810      | 841.477795 | 421.242536       | 840.493779     | 420.750528       | 8  |
| 4  | <b>383.265282</b> | 192.136279        |            |                  |                |                  | I    | <b>801.482880</b> | 401.245078      | 784.456331 | 392.731804       | 783.472315     | 392.239796       | 7  |
| 5  | <b>482.333696</b> | 241.670486        |            |                  |                |                  | V    | <b>688.398816</b> | 344.703046      | 671.372267 | 336.189772       | 670.388251     | 335.697764       | 6  |
| 6  | <b>581.402110</b> | 291.204693        |            |                  |                |                  | V    | <b>589.330402</b> | 295.168839      | 572.303853 | 286.655565       | 571.319837     | 286.163557       | 5  |
| 7  | <b>709.460688</b> | <b>355.233982</b> | 692.434139 | 346.720708       |                |                  | Q    | <b>490.261988</b> | 245.634632      | 473.235439 | 237.121357       | 472.251423     | 236.629349       | 4  |
| 8  | 823.503615        | 412.255446        | 806.477066 | 403.742171       |                |                  | N    | <b>362.203410</b> | 181.605343      | 345.176861 | 173.092068       | 344.192845     | 172.600060       | 3  |
| 9  | 924.551294        | 462.779285        | 907.524745 | 454.266011       | 906.540729     | 453.774003       | T    | <b>248.160483</b> | 124.583879      | 231.133934 | 116.070605       | 230.149918     | 115.578597       | 2  |
| 10 |                   |                   |            |                  |                |                  | K    | 147.112804        | 74.060040       | 130.086255 | 65.546765        |                |                  | 1  |

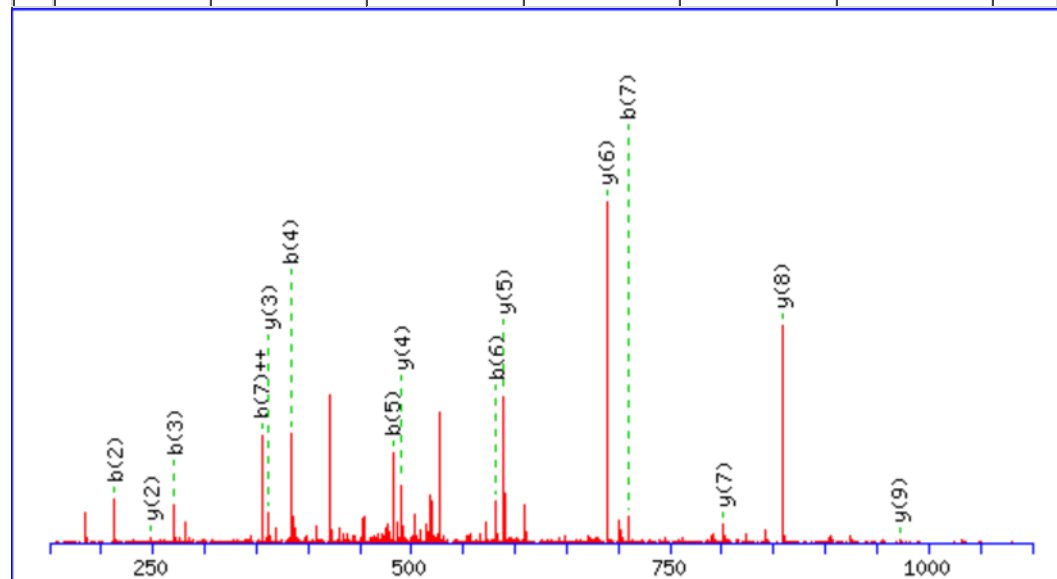

## Peptide View

MS/MS Fragmentation of **SSAGNAPCSPCAR**

Found in **IPI00005222**, Tax\_Id=9606 Gene\_Symbol=EPHB6 ephrin receptor EphB6 precursor

**Experiment:** 19 - NOPB1 **Fraction:** NOPB1

Match to Query 8348: 1430.604248 from(716.309400,2+)

Title: OECHL100310\_11.3012.3012.2.dta

Data file \\BOROMIR\Masse\Data LTQ-Orbitrap\Chrystelle Lacroix\Etude clinique sJPU\OECHL100310\_11.raw

**Monoisotopic mass of neutral peptide Mr(calc):** 1430.603073 **Fixed modifications:** Carbamidomethyl (C) (apply to specified residues or termini only) **Ions**

**Score:** 56 **Expect:** 7.6e-005 **Matches :** 31/138 fragment ions using 49 most intense peaks ([help](#))

| #  | b           | b <sup>++</sup> | b*          | b <sup>*++</sup> | b <sup>0</sup> | b <sup>0++</sup> | Seq. | y           | y <sup>++</sup> | y*          | y <sup>*++</sup> | y <sup>0</sup> | y <sup>0++</sup> |
|----|-------------|-----------------|-------------|------------------|----------------|------------------|------|-------------|-----------------|-------------|------------------|----------------|------------------|
| 1  | 88.039304   | 44.523290       |             |                  | 70.028739      | 35.518008        | S    |             |                 |             |                  |                |                  |
| 2  | 175.071332  | 88.039304       |             |                  | 157.060767     | 79.034021        | S    | 1344.578331 | 672.792803      | 1327.551782 | 664.279529       | 1326.567766    | 663.7875         |
| 3  | 246.108446  | 123.557861      |             |                  | 228.097881     | 114.552578       | A    | 1257.546303 | 629.276790      | 1240.519754 | 620.763515       | 1239.535738    | 620.2715         |
| 4  | 303.129910  | 152.068593      |             |                  | 285.119345     | 143.063311       | G    | 1186.509189 | 593.758233      | 1169.482640 | 585.244958       | 1168.498624    | 584.7529         |
| 5  | 417.172837  | 209.090057      | 400.146288  | 200.576782       | 399.162272     | 200.084774       | N    | 1129.487725 | 565.247501      | 1112.461176 | 556.734226       | 1111.477160    | 556.2422         |
| 6  | 488.209951  | 244.608613      | 471.183402  | 236.095339       | 470.199386     | 235.603331       | A    | 1015.444798 | 508.226037      | 998.418249  | 499.712763       | 997.434233     | 499.2207         |
| 7  | 585.262715  | 293.134996      | 568.236166  | 284.621721       | 567.252150     | 284.129713       | P    | 944.407684  | 472.707480      | 927.381135  | 464.194206       | 926.397119     | 463.7021         |
| 8  | 745.293364  | 373.150320      | 728.266815  | 364.637046       | 727.282799     | 364.145038       | C    | 847.354920  | 424.181098      | 830.328371  | 415.667824       | 829.344355     | 415.1758         |
| 9  | 832.325392  | 416.666334      | 815.298843  | 408.153060       | 814.314827     | 407.661052       | S    | 687.324271  | 344.165774      | 670.297722  | 335.652499       | 669.313706     | 335.1604         |
| 10 | 929.378156  | 465.192716      | 912.351607  | 456.679442       | 911.367591     | 456.187434       | P    | 600.292243  | 300.649760      | 583.265694  | 292.136485       |                |                  |
| 11 | 1089.408805 | 545.208041      | 1072.382256 | 536.694766       | 1071.398240    | 536.202758       | C    | 503.239479  | 252.123377      | 486.212930  | 243.610103       |                |                  |
| 12 | 1186.461569 | 593.734423      | 1169.435020 | 585.221148       | 1168.451004    | 584.729140       | P    | 343.208830  | 172.108053      | 326.182281  | 163.594778       |                |                  |
| 13 | 1257.498683 | 629.252980      | 1240.472134 | 620.739705       | 1239.488118    | 620.247697       | A    | 246.156066  | 123.581671      | 229.129517  | 115.068396       |                |                  |
| 14 |             |                 |             |                  |                |                  | R    | 175.118952  | 88.063114       | 158.092403  | 79.549839        |                |                  |

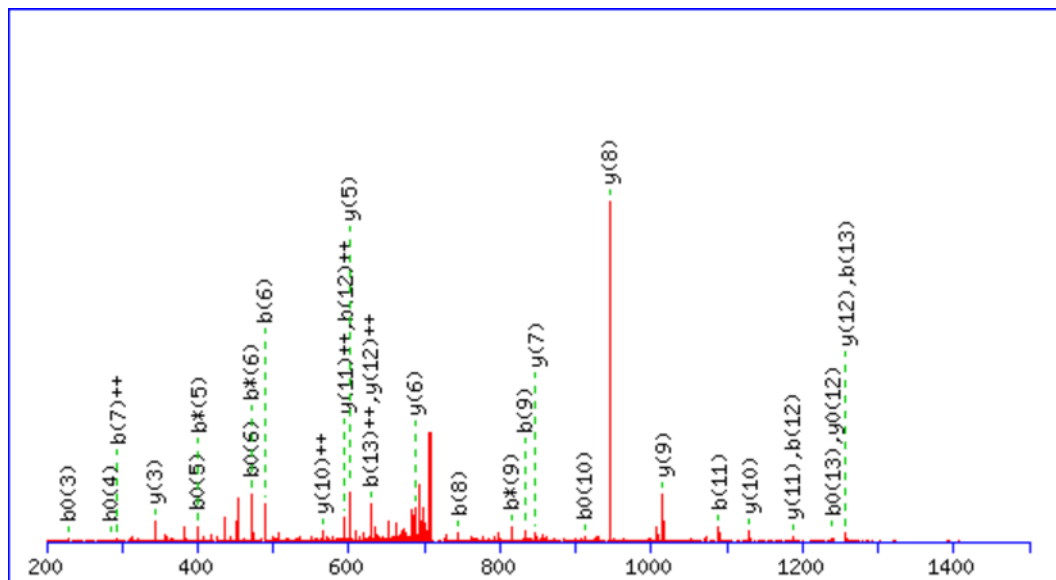

## Peptide View

MS/MS Fragmentation of **GLAEAAGPR**

Found in **IPI00290826**, Tax\_Id=9606 Gene\_Symbol=FAM174A Membrane protein FAM174A

**Experiment:** 19 - NOPB1 **Fraction:** NOPB1

Match to Query 1046: 840.445048 from(421.229800,2+)

Title: OECHL100310\_11.3890.3890.2.dta

Data file \\BOROMIR\Masse\Data LTQ-Orbitrap\Chrystelle Lacroix\Etude clinique sJPU\OECHL100310\_11.raw

**Monoisotopic mass of neutral peptide Mr(calc):** 840.445343**Fixed modifications:** Carbamidomethyl (C) (apply to specified residues or termini only)**Ions Score:**

**52 Expect:** 0.00034**Matches :** 13/64 fragment ions using 22 most intense peaks ([help](#))

| # | b                 | b <sup>++</sup> | b <sup>0</sup> | b <sup>0++</sup> | Seq.     | y                 | y <sup>++</sup>   | y <sup>*</sup> | y <sup>*++</sup> | y <sup>0</sup> | y <sup>0++</sup> | #        |
|---|-------------------|-----------------|----------------|------------------|----------|-------------------|-------------------|----------------|------------------|----------------|------------------|----------|
| 1 | 58.028740         | 29.518008       |                |                  | <b>G</b> |                   |                   |                |                  |                |                  | <b>9</b> |
| 2 | <b>171.112804</b> | 86.060040       |                |                  | <b>L</b> | 784.431179        | 392.719228        | 767.404630     | 384.205953       | 766.420614     | 383.713945       | <b>8</b> |
| 3 | <b>242.149918</b> | 121.578597      |                |                  | <b>A</b> | <b>671.347115</b> | <b>336.177196</b> | 654.320566     | 327.663921       | 653.336550     | 327.171913       | <b>7</b> |
| 4 | 371.192511        | 186.099894      | 353.181946     | 177.094611       | <b>E</b> | <b>600.310001</b> | 300.658639        | 583.283452     | 292.145364       | 582.299436     | 291.653356       | <b>6</b> |
| 5 | <b>442.229625</b> | 221.618450      | 424.219060     | 212.613168       | <b>A</b> | <b>471.267408</b> | 236.137342        | 454.240859     | 227.624067       |                |                  | <b>5</b> |

|   |                   |            |            |            |   |                   |            |            |            |  |  |   |
|---|-------------------|------------|------------|------------|---|-------------------|------------|------------|------------|--|--|---|
| 6 | <b>513.266739</b> | 257.137008 | 495.256174 | 248.131725 | A | <b>400.230294</b> | 200.618785 | 383.203745 | 192.105510 |  |  | 4 |
| 7 | <b>570.288203</b> | 285.647740 | 552.277638 | 276.642457 | G | <b>329.193180</b> | 165.100228 | 312.166631 | 156.586953 |  |  | 3 |
| 8 | 667.340967        | 334.174122 | 649.330402 | 325.168839 | P | <b>272.171716</b> | 136.589496 | 255.145167 | 128.076221 |  |  | 2 |
| 9 |                   |            |            |            | R | <b>175.118952</b> | 88.063114  | 158.092403 | 79.549839  |  |  | 1 |

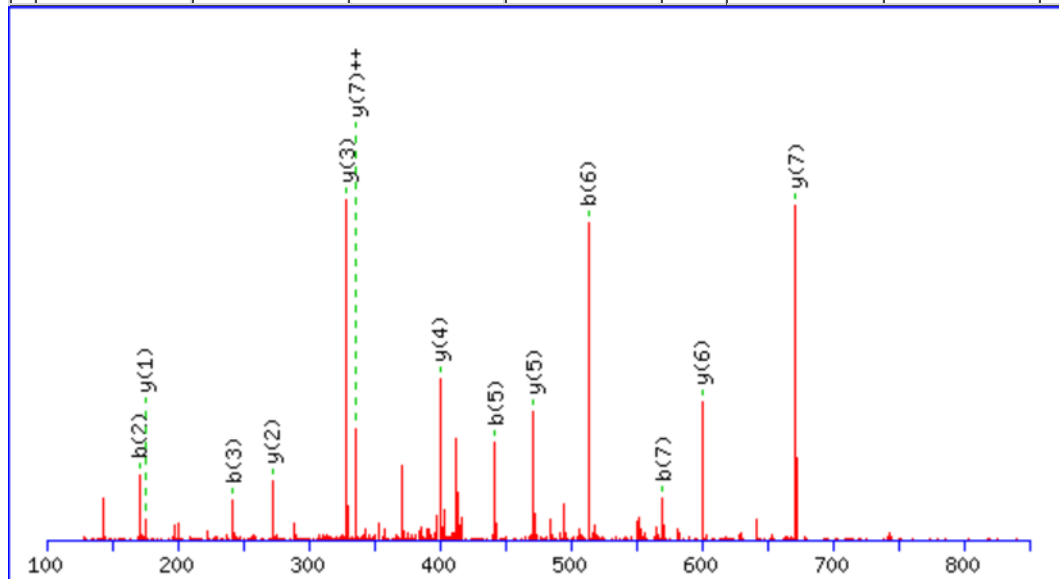

## Peptide View

### MS/MS Fragmentation of **DFSLTSSSQTPGATK**

Found in **IPI00291300**, Tax\_Id=9606 Gene\_Symbol=PODXL2 Putative uncharacterized protein PODXL2

Experiment: 01 - S\_A-1 Fraction: S\_A-1

Match to Query 9898: 1525.725848 from(763.870200,2+)

Title: OECHL100310\_09.10760.10760.2.dta

Data file \\BOROMIR\Masse\Data LTQ-Orbitrap\Chrystelle Lacroix\Etude clinique sJPU\OECHL100310\_09.raw

**Monoisotopic mass of neutral peptide Mr(calc): 1525.726028** Fixed modifications: Carbamidomethyl (C) (apply to specified residues or termini only) **Ions**

**Score: 86** **Expect: 2.6e-007** **Matches : 40/150** fragment ions using 61 most intense peaks ([help](#))

| # | b          | b <sup>++</sup> | b <sup>*</sup> | b <sup>*++</sup> | b <sup>0</sup> | b <sup>0++</sup> | Seq.     | y | y <sup>++</sup> | y <sup>*</sup> | y <sup>*++</sup> | y <sup>0</sup> | y <sup>0++</sup> |
|---|------------|-----------------|----------------|------------------|----------------|------------------|----------|---|-----------------|----------------|------------------|----------------|------------------|
| 1 | 116.034219 | 58.520748       |                |                  | 98.023654      | 49.515465        | <b>D</b> |   |                 |                |                  |                |                  |

|    |                    |            |                    |            |                    |            |          |                    |                   |                   |                   |                   |                 |
|----|--------------------|------------|--------------------|------------|--------------------|------------|----------|--------------------|-------------------|-------------------|-------------------|-------------------|-----------------|
| 2  | <b>263.102633</b>  | 132.054954 |                    |            | 245.092068         | 123.049672 | <b>F</b> | 1411.706351        | 706.356813        | 1394.679802       | 697.843539        | 1393.695786       | 697.3515        |
| 3  | <b>350.134661</b>  | 175.570968 |                    |            | <b>332.124096</b>  | 166.565686 | <b>S</b> | <b>1264.637937</b> | <b>632.822607</b> | 1247.611388       | <b>624.309332</b> | 1246.627372       | <b>623.8173</b> |
| 4  | 463.218725         | 232.113001 |                    |            | <b>445.208160</b>  | 223.107718 | <b>L</b> | <b>1177.605909</b> | <b>589.306592</b> | 1160.579360       | 580.793318        | 1159.595344       | 580.3013        |
| 5  | <b>564.266404</b>  | 282.636840 |                    |            | <b>546.255839</b>  | 273.631558 | <b>T</b> | <b>1064.521845</b> | 532.764561        | 1047.495296       | 524.251286        | 1046.511280       | 523.7592        |
| 6  | <b>651.298432</b>  | 326.152854 |                    |            | <b>633.287867</b>  | 317.147572 | <b>S</b> | <b>963.474166</b>  | 482.240721        | 946.447617        | <b>473.727446</b> | 945.463601        | <b>473.2354</b> |
| 7  | 738.330460         | 369.668868 |                    |            | 720.319895         | 360.663586 | <b>S</b> | <b>876.442138</b>  | 438.724707        | 859.415589        | 430.211432        | <b>858.431573</b> | 429.7194        |
| 8  | <b>825.362488</b>  | 413.184882 |                    |            | 807.351923         | 404.179599 | <b>S</b> | <b>789.410110</b>  | 395.208693        | 772.383561        | 386.695418        | 771.399545        | 386.2034        |
| 9  | <b>953.421066</b>  | 477.214171 | 936.394517         | 468.700897 | <b>935.410501</b>  | 468.208889 | <b>Q</b> | <b>702.378082</b>  | 351.692679        | <b>685.351533</b> | 343.179404        | 684.367517        | 342.6873        |
| 10 | <b>1054.468745</b> | 527.738010 | 1037.442196        | 519.224736 | <b>1036.458180</b> | 518.732728 | <b>T</b> | <b>574.319504</b>  | 287.663390        | 557.292955        | 279.150115        | 556.308939        | 278.6581        |
| 11 | 1151.521509        | 576.264392 | 1134.494960        | 567.751118 | 1133.510944        | 567.259110 | <b>P</b> | <b>473.271825</b>  | 237.139550        | 456.245276        | 228.626276        | 455.261260        | 228.1342        |
| 12 | <b>1208.542973</b> | 604.775124 | 1191.516424        | 596.261850 | 1190.532408        | 595.769842 | <b>G</b> | <b>376.219061</b>  | 188.613168        | 359.192512        | 180.099894        | 358.208496        | 179.6078        |
| 13 | <b>1279.580087</b> | 640.293681 | 1262.553538        | 631.780407 | <b>1261.569522</b> | 631.288399 | <b>A</b> | <b>319.197597</b>  | 160.102436        | <b>302.171048</b> | 151.589162        | 301.187032        | 151.0971        |
| 14 | <b>1380.627766</b> | 690.817521 | <b>1363.601217</b> | 682.304246 | <b>1362.617201</b> | 681.812238 | <b>T</b> | <b>248.160483</b>  | 124.583879        | 231.133934        | 116.070605        | 230.149918        | 115.5785        |
| 15 |                    |            |                    |            |                    |            | <b>K</b> | 147.112804         | 74.060040         | 130.086255        | 65.546765         |                   |                 |

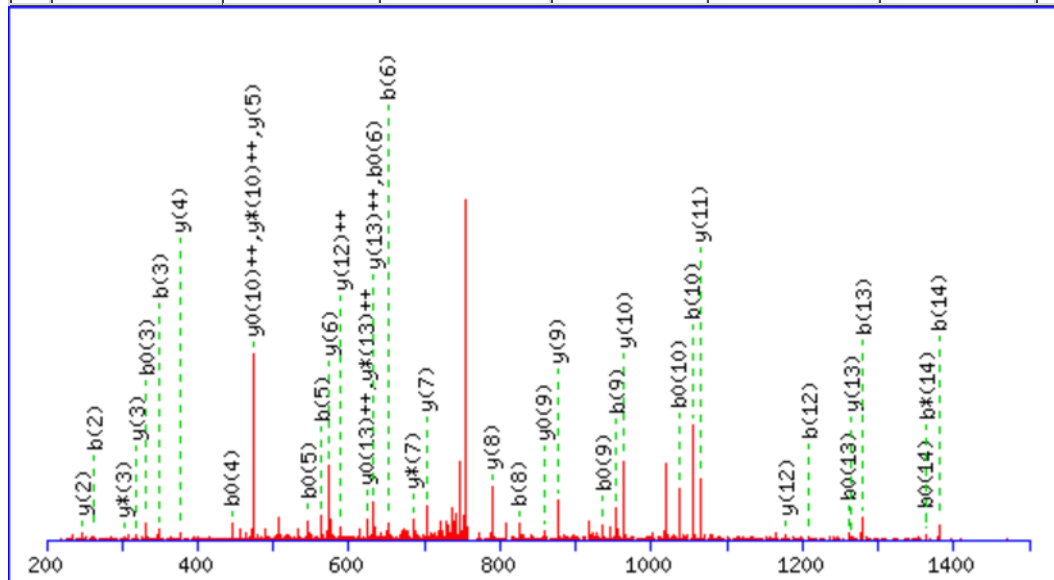

## Peptide View

MS/MS Fragmentation of **NPVLQQDAHSSVTITPQR**

Found in **IPI00410488**, Tax\_Id=9606 Gene\_Symbol=CD276 Isoform 1 of CD276 antigen

Experiment: 01 - S\_A-1 Fraction: S\_A-1

Match to Query 13745: 1990.023848 from(996.019200,2+)

Title: OECHL100310\_09.9739.9739.2.dta

Data file \\BOROMIR\Masse\Data LTQ-Orbitrap\Chrystelle Lacroix\Etude clinique sJPU\OECHL100310\_09.raw

**Monoisotopic mass of neutral peptide Mr(calc):** 1990.023209**Fixed modifications:** Carbamidomethyl (C) (apply to specified residues or termini only)**Ions**

**Score:** 92 **Expect:** 7.9e-008**Matches :** 36/186 fragment ions using 64 most intense peaks ([help](#))

| #  | b                  | b <sup>++</sup>   | b*                 | b* <sup>++</sup> | b <sup>0</sup>     | b <sup>0++</sup>  | Seq. | y                  | y <sup>++</sup>   | y*          | y* <sup>++</sup>  | y <sup>0</sup> | y <sup>0++</sup> |
|----|--------------------|-------------------|--------------------|------------------|--------------------|-------------------|------|--------------------|-------------------|-------------|-------------------|----------------|------------------|
| 1  | 115.050203         | 58.028740         | 98.023654          | 49.515465        |                    |                   | N    |                    |                   |             |                   |                |                  |
| 2  | 212.102967         | 106.555121        | 195.076418         | 98.041847        |                    |                   | P    | 1876.987553        | 938.997415        | 1859.961004 | 930.484140        | 1858.976988    | 929.9921         |
| 3  | <b>311.171381</b>  | 156.089328        | 294.144832         | 147.576054       |                    |                   | V    | <b>1779.934789</b> | <b>890.471033</b> | 1762.908240 | 881.957758        | 1761.924224    | 881.4657         |
| 4  | 424.255445         | 212.631361        | 407.228896         | 204.118086       |                    |                   | L    | <b>1680.866375</b> | <b>840.936826</b> | 1663.839826 | 832.423551        | 1662.855810    | 831.9315         |
| 5  | <b>552.314023</b>  | 276.660650        | <b>535.287474</b>  | 268.147375       |                    |                   | Q    | <b>1567.782311</b> | 784.394794        | 1550.755762 | <b>775.881519</b> | 1549.771746    | <b>775.3895</b>  |
| 6  | <b>680.372601</b>  | 340.689939        | <b>663.346052</b>  | 332.176664       |                    |                   | Q    | <b>1439.723733</b> | 720.365505        | 1422.697184 | 711.852230        | 1421.713168    | 711.3602         |
| 7  | <b>795.399544</b>  | 398.203410        | 778.372995         | 389.690136       | 777.388979         | 389.198128        | D    | <b>1311.665155</b> | 656.336215        | 1294.638606 | 647.822941        | 1293.654590    | 647.3309         |
| 8  | 866.436658         | 433.721967        | 849.410109         | 425.208693       | 848.426093         | 424.716685        | A    | <b>1196.638212</b> | 598.822744        | 1179.611663 | 590.309470        | 1178.627647    | 589.8174         |
| 9  | 1003.495570        | <b>502.251423</b> | 986.469021         | 493.738149       | 985.485005         | 493.246141        | H    | <b>1125.601098</b> | 563.304187        | 1108.574549 | 554.790913        | 1107.590533    | 554.2989         |
| 10 | <b>1090.527598</b> | 545.767437        | 1073.501049        | 537.254163       | 1072.517033        | 536.762155        | S    | <b>988.542186</b>  | 494.774731        | 971.515637  | 486.261457        | 970.531621     | 485.7694         |
| 11 | 1177.559626        | 589.283451        | 1160.533077        | 580.770177       | 1159.549061        | 580.278169        | S    | <b>901.510158</b>  | 451.258717        | 884.483609  | 442.745443        | 883.499593     | 442.2534         |
| 12 | <b>1276.628040</b> | 638.817658        | 1259.601491        | 630.304384       | 1258.617475        | 629.812376        | V    | <b>814.478130</b>  | 407.742703        | 797.451581  | 399.229428        | 796.467565     | 398.7374         |
| 13 | 1377.675719        | 689.341498        | <b>1360.649170</b> | 680.828223       | 1359.665154        | <b>680.336215</b> | T    | <b>715.409716</b>  | 358.208496        | 698.383167  | 349.695221        | 697.399151     | 349.2032         |
| 14 | <b>1490.759783</b> | 745.883530        | <b>1473.733234</b> | 737.370255       | <b>1472.749218</b> | 736.878247        | I    | <b>614.362037</b>  | 307.684656        | 597.335488  | 299.171382        | 596.351472     | 298.6793         |
| 15 | <b>1591.807462</b> | 796.407369        | 1574.780913        | 787.894095       | <b>1573.796897</b> | 787.402087        | T    | <b>501.277973</b>  | 251.142624        | 484.251424  | 242.629350        | 483.267408     | 242.1373         |
| 16 | 1688.860226        | 844.933751        | 1671.833677        | 836.420477       | 1670.849661        | 835.928469        | P    | <b>400.230294</b>  | 200.618785        | 383.203745  | 192.105510        |                |                  |
| 17 | <b>1816.918804</b> | 908.963040        | 1799.892255        | 900.449766       | 1798.908239        | 899.957758        | Q    | 303.177530         | 152.092403        | 286.150981  | 143.579128        |                |                  |
| 18 |                    |                   |                    |                  |                    |                   | R    | 175.118952         | 88.063114         | 158.092403  | 79.549839         |                |                  |

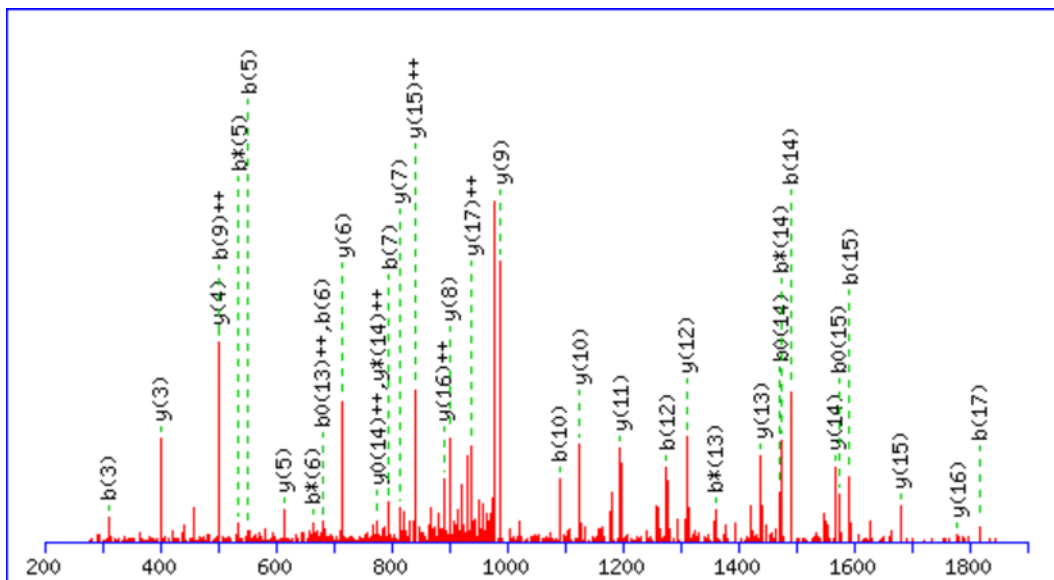

## Peptide View

MS/MS Fragmentation of **AVGLLTVISK**

Found in **IPI00013446**, Tax\_Id=9606 Gene\_Symbol=PSCA Prostate stem cell antigen

**Experiment:** 01 - S\_A-1 **Fraction:** S\_A-1

Match to Query 2880: 999.634448 from(500.824500,2+)

Title: OECHL100310\_09.16992.16992.2.dta

Data file \\BOROMIR\Masse\Data LTQ-Orbitrap\Chrystelle Lacroix\Etude clinique sJPU\OECHL100310\_09.raw

**Monoisotopic mass of neutral peptide Mr(calc):** 999.632828 **Fixed modifications:** Carbamidomethyl (C) (apply to specified residues or termini only) **Ions Score:**

**65 Expect:** 3.9e-006 **Matches :** 14/78 fragment ions using 24 most intense peaks ([help](#))

| # | b                 | b <sup>++</sup>   | b <sup>0</sup> | b <sup>0++</sup> | Seq. | y                 | y <sup>++</sup> | y <sup>*</sup> | y <sup>*++</sup> | y <sup>0</sup> | y <sup>0++</sup> | #  |
|---|-------------------|-------------------|----------------|------------------|------|-------------------|-----------------|----------------|------------------|----------------|------------------|----|
| 1 | 72.044390         | 36.525833         |                |                  | A    |                   |                 |                |                  |                |                  | 10 |
| 2 | <b>171.112804</b> | 86.060040         |                |                  | V    | 929.602995        | 465.305136      | 912.576446     | 456.791861       | 911.592430     | 456.299853       | 9  |
| 3 | <b>228.134268</b> | 114.570772        |                |                  | G    | <b>830.534581</b> | 415.770929      | 813.508032     | 407.257654       | 812.524016     | 406.765646       | 8  |
| 4 | <b>341.218332</b> | <b>171.112804</b> |                |                  | L    | 773.513117        | 387.260197      | 756.486568     | 378.746922       | 755.502552     | 378.254914       | 7  |
| 5 | <b>454.302396</b> | 227.654836        |                |                  | L    | <b>660.429053</b> | 330.718165      | 643.402504     | 322.204890       | 642.418488     | 321.712882       | 6  |



|    |            |            |            |            |   |            |            |            |            |            |            |   |
|----|------------|------------|------------|------------|---|------------|------------|------------|------------|------------|------------|---|
| 6  | 555.350075 | 278.178676 | 537.339510 | 269.173393 | T | 547.344989 | 274.176133 | 530.318440 | 265.662858 | 529.334424 | 265.170850 | 5 |
| 7  | 654.418489 | 327.712883 | 636.407924 | 318.707600 | V | 446.297310 | 223.652293 | 429.270761 | 215.139018 | 428.286745 | 214.647010 | 4 |
| 8  | 767.502553 | 384.254915 | 749.491988 | 375.249632 | I | 347.228896 | 174.118086 | 330.202347 | 165.604811 | 329.218331 | 165.112803 | 3 |
| 9  | 854.534581 | 427.770929 | 836.524016 | 418.765646 | S | 234.144832 | 117.576054 | 217.118283 | 109.062779 | 216.134267 | 108.570771 | 2 |
| 10 |            |            |            |            | K | 147.112804 | 74.060040  | 130.086255 | 65.546765  |            |            | 1 |

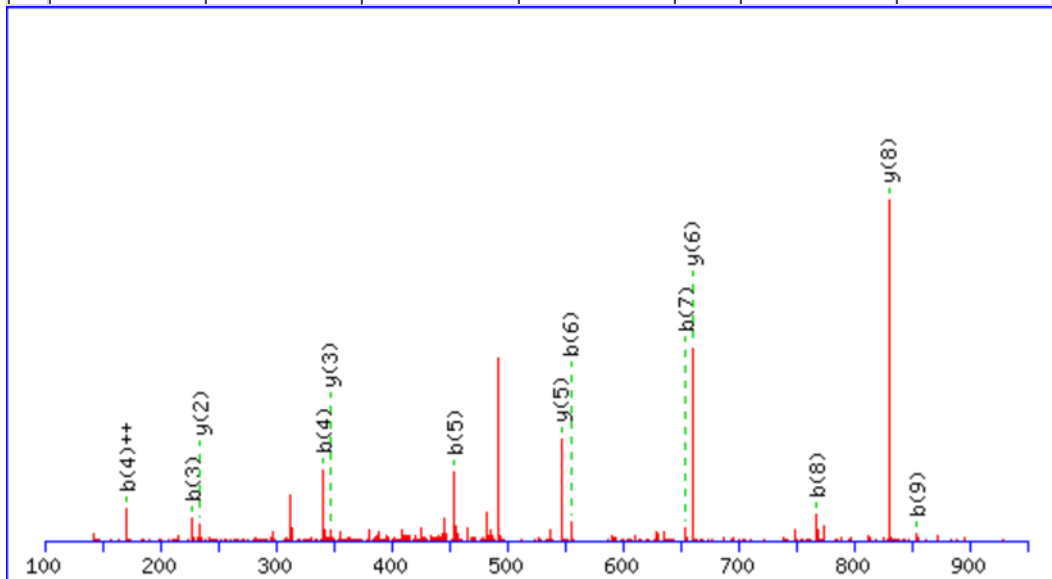

## Peptide View

MS/MS Fragmentation of **LLETECPQYIR**

Found in **IPI0007047**, Tax\_Id=9606 Gene\_Symbol=S100A8 Protein S100-A8

Experiment: 01 - S\_A-1 Fraction: S\_A-1

Match to Query 8738: 1420.702448 from(711.358500,2+)

Title: OECHL100310\_09.12192.12192.2.dta

Data file \\BOROMIR\Masse\Data LTQ-Orbitrap\Chrystelle Lacroix\Etude clinique sJPU\OECHL100310\_09.raw

**Monoisotopic mass of neutral peptide Mr(calc):** 1420.702026 **Fixed modifications:** Carbamidomethyl (C) (apply to specified residues or termini only) **Ions**

**Score:** 66 **Expect:** 3.1e-005 **Matches :** 11/90 fragment ions using 11 most intense peaks ([help](#))

| # | b | b <sup>++</sup> | b* | b <sup>+++</sup> | b <sup>0</sup> | b <sup>0++</sup> | Seq. | y | y <sup>++</sup> | y* | y <sup>+++</sup> | y <sup>0</sup> | y <sup>0++</sup> |
|---|---|-----------------|----|------------------|----------------|------------------|------|---|-----------------|----|------------------|----------------|------------------|
|---|---|-----------------|----|------------------|----------------|------------------|------|---|-----------------|----|------------------|----------------|------------------|

|    |                    |            |             |            |             |            |   |                    |                   |             |            |             |          |
|----|--------------------|------------|-------------|------------|-------------|------------|---|--------------------|-------------------|-------------|------------|-------------|----------|
| 1  | 114.091340         | 57.549308  |             |            |             |            | L |                    |                   |             |            |             |          |
| 2  | 227.175404         | 114.091340 |             |            |             |            | L | 1308.625265        | 654.816271        | 1291.598716 | 646.302996 | 1290.614700 | 645.8109 |
| 3  | <b>356.217997</b>  | 178.612637 |             |            | 338.207432  | 169.607354 | E | <b>1195.541201</b> | <b>598.274239</b> | 1178.514652 | 589.760964 | 1177.530636 | 589.2689 |
| 4  | 457.265676         | 229.136476 |             |            | 439.255111  | 220.131194 | T | <b>1066.498608</b> | 533.752942        | 1049.472059 | 525.239668 | 1048.488043 | 524.7476 |
| 5  | 586.308269         | 293.657773 |             |            | 568.297704  | 284.652490 | E | <b>965.450929</b>  | 483.229103        | 948.424380  | 474.715828 | 947.440364  | 474.2238 |
| 6  | <b>746.338918</b>  | 373.673097 |             |            | 728.328353  | 364.667815 | C | <b>836.408336</b>  | 418.707806        | 819.381787  | 410.194531 |             |          |
| 7  | 843.391682         | 422.199479 |             |            | 825.381117  | 413.194197 | P | <b>676.377687</b>  | 338.692481        | 659.351138  | 330.179207 |             |          |
| 8  | 971.450260         | 486.228768 | 954.423711  | 477.715494 | 953.439695  | 477.223486 | Q | 579.324923         | 290.166099        | 562.298374  | 281.652825 |             |          |
| 9  | 1134.513589        | 567.760433 | 1117.487040 | 559.247158 | 1116.503024 | 558.755150 | Y | <b>451.266345</b>  | 226.136810        | 434.239796  | 217.623536 |             |          |
| 10 | <b>1247.597653</b> | 624.302465 | 1230.571104 | 615.789190 | 1229.587088 | 615.297182 | I | <b>288.203016</b>  | 144.605146        | 271.176467  | 136.091871 |             |          |
| 11 |                    |            |             |            |             |            | R | 175.118952         | 88.063114         | 158.092403  | 79.549839  |             |          |

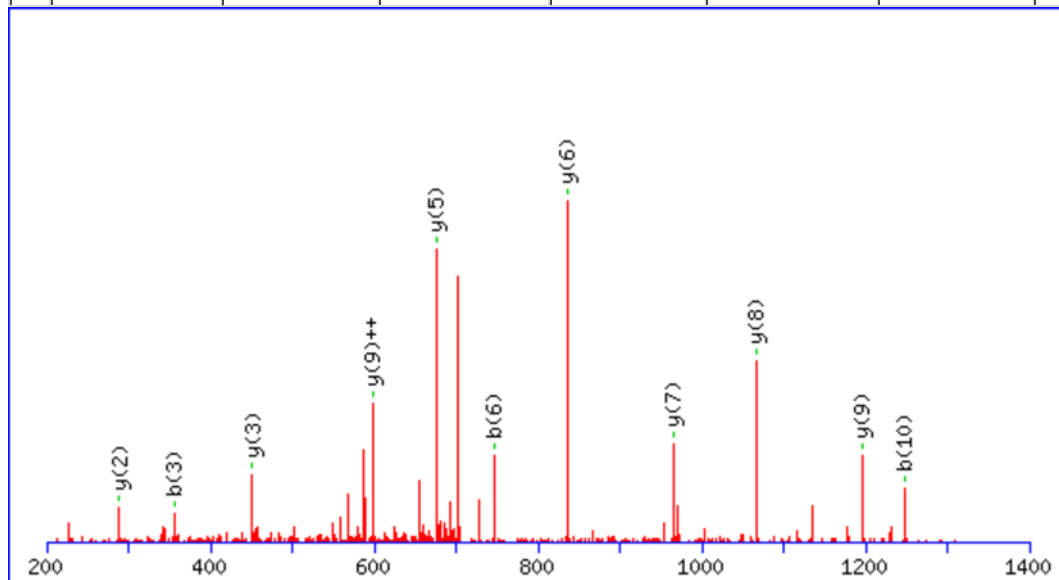

## Peptide View

MS/MS Fragmentation of **YSGSEGSTQTLTKGELK**

Found in **IPI00017526**, Tax\_Id=9606 Gene\_Symbol=S100P Protein S100-P

**Experiment: 01 - S\_A-1 Fraction: S\_A-1**

Match to Query 12365: 1784.879248 from(893.446900,2+)

Title: OECHL100310\_09.7433.7433.2.dta

Data file \\BOROMIR\Masse\Data LTQ-Orbitrap\Chrystelle Lacroix\Etude clinique sJPU\OECHL100310\_09.raw

**Monoisotopic mass of neutral peptide Mr(calc): 1784.879211** **Fixed modifications:** Carbamidomethyl (C) (apply to specified residues or termini only) **Ions****Score: 60** **Expect: 0.00017** **Matches : 15/170** fragment ions using 31 most intense peaks ([help](#))

| #  | <b>b</b>           | <b>b<sup>++</sup></b> | <b>b*</b>   | <b>b<sup>*++</sup></b> | <b>b<sup>0</sup></b> | <b>b<sup>0++</sup></b> | Seq.     | <b>y</b>           | <b>y<sup>++</sup></b> | <b>y*</b>   | <b>y<sup>*++</sup></b> | <b>y<sup>0</sup></b> | <b>y<sup>0++</sup></b> |
|----|--------------------|-----------------------|-------------|------------------------|----------------------|------------------------|----------|--------------------|-----------------------|-------------|------------------------|----------------------|------------------------|
| 1  | 164.070605         | 82.538940             |             |                        |                      |                        | <b>Y</b> |                    |                       |             |                        |                      |                        |
| 2  | 251.102633         | 126.054954            |             |                        | 233.092068           | 117.049672             | <b>S</b> | 1622.823172        | 811.915224            | 1605.796623 | 803.401950             | 1604.812607          | 802.9099               |
| 3  | 308.124097         | 154.565687            |             |                        | 290.113532           | 145.560404             | <b>G</b> | 1535.791144        | 768.399210            | 1518.764595 | 759.885936             | 1517.780579          | 759.3939               |
| 4  | 395.156125         | 198.081701            |             |                        | 377.145560           | 189.076418             | <b>S</b> | 1478.769680        | 739.888478            | 1461.743131 | 731.375204             | 1460.759115          | 730.8831               |
| 5  | <b>524.198718</b>  | 262.602997            |             |                        | 506.188153           | 253.597715             | <b>E</b> | <b>1391.737652</b> | 696.372464            | 1374.711103 | 687.859190             | 1373.727087          | 687.3671               |
| 6  | 581.220182         | 291.113729            |             |                        | 563.209617           | 282.108447             | <b>G</b> | <b>1262.695059</b> | <b>631.851167</b>     | 1245.668510 | 623.337893             | <b>1244.684494</b>   | 622.8458               |
| 7  | 668.252210         | 334.629743            |             |                        | 650.241645           | 325.624461             | <b>S</b> | <b>1205.673595</b> | 603.340436            | 1188.647046 | 594.827161             | 1187.663030          | 594.3351               |
| 8  | 769.299889         | 385.153583            |             |                        | 751.289324           | 376.148300             | <b>T</b> | <b>1118.641567</b> | 559.824421            | 1101.615018 | 551.311147             | 1100.631002          | 550.8191               |
| 9  | 897.358467         | 449.182872            | 880.331918  | 440.669597             | 879.347902           | 440.177589             | <b>Q</b> | <b>1017.593888</b> | 509.300582            | 1000.567339 | 500.787307             | 999.583323           | 500.2952               |
| 10 | 998.406146         | 499.706711            | 981.379597  | 491.193437             | 980.395581           | 490.701429             | <b>T</b> | 889.535310         | 445.271293            | 872.508761  | 436.758018             | 871.524745           | 436.2660               |
| 11 | 1111.490210        | 556.248743            | 1094.463661 | 547.735469             | 1093.479645          | 547.243461             | <b>L</b> | <b>788.487631</b>  | 394.747453            | 771.461082  | 386.234179             | 770.477066           | 385.7421               |
| 12 | 1212.537889        | 606.772583            | 1195.511340 | 598.259308             | 1194.527324          | 597.767300             | <b>T</b> | <b>675.403567</b>  | 338.205421            | 658.377018  | 329.692147             | 657.393002           | 329.2001               |
| 13 | 1340.632852        | 670.820064            | 1323.606303 | 662.306790             | 1322.622287          | 661.814782             | <b>K</b> | <b>574.355888</b>  | 287.681582            | 557.329339  | 279.168307             | 556.345323           | 278.6762               |
| 14 | 1397.654316        | 699.330796            | 1380.627767 | 690.817522             | 1379.643751          | 690.325514             | <b>G</b> | <b>446.260925</b>  | 223.634100            | 429.234376  | 215.120826             | 428.250360           | 214.6288               |
| 15 | <b>1526.696909</b> | 763.852093            | 1509.670360 | 755.338818             | 1508.686344          | 754.846810             | <b>E</b> | 389.239461         | 195.123368            | 372.212912  | 186.610094             | 371.228896           | 186.1180               |
| 16 | <b>1639.780973</b> | 820.394124            | 1622.754424 | 811.880850             | 1621.770408          | 811.388842             | <b>L</b> | <b>260.196868</b>  | 130.602072            | 243.170319  | 122.088797             |                      |                        |
| 17 |                    |                       |             |                        |                      |                        | <b>K</b> | 147.112804         | 74.060040             | 130.086255  | 65.546765              |                      |                        |

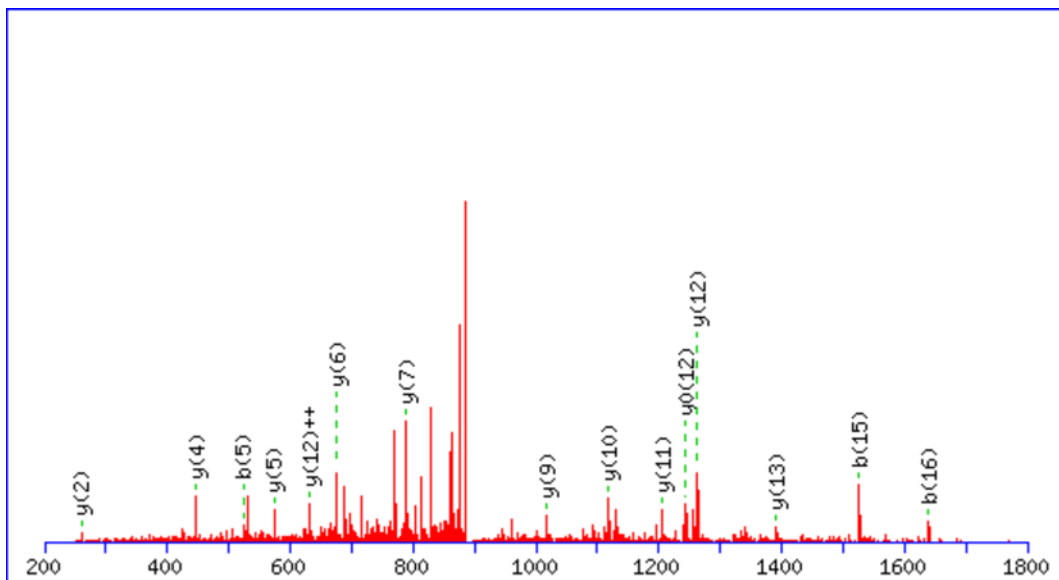

## Peptide View

MS/MS Fragmentation of **VGALASLIR**

Found in **IPI00005794**, Tax\_Id=9606 Gene\_Symbol=PGCP Putative uncharacterized protein ENSP00000323500

**Experiment:** 01 - S\_A-1 **Fraction:** S\_A-1

Match to Query 1488: 898.560448 from(450.287500,2+)

Title: OECHL100310\_09.15481.15481.2.dta

Data file \\BOROMIR\Masse\Data LTQ-Orbitrap\Chrystelle Lacroix\Etude clinique sJPU\OECHL100310\_09.raw

**Monoisotopic mass of neutral peptide Mr(calc):** 898.55982 **Fixed modifications:** Carbamidomethyl (C) (apply to specified residues or termini only) **Ions Score:**

51 **Expect:** 0.00039 **Matches :** 12/64 fragment ions using 32 most intense peaks ([help](#))

| # | b                 | b <sup>++</sup> | b <sup>0</sup> | b <sup>0++</sup> | Seq. | y                 | y <sup>++</sup> | y <sup>*</sup> | y <sup>*++</sup> | y <sup>0</sup> | y <sup>0++</sup> | # |
|---|-------------------|-----------------|----------------|------------------|------|-------------------|-----------------|----------------|------------------|----------------|------------------|---|
| 1 | 100.075690        | 50.541483       |                |                  | V    |                   |                 |                |                  |                |                  | 9 |
| 2 | <b>157.097154</b> | 79.052215       |                |                  | G    | <b>800.498864</b> | 400.753070      | 783.472315     | 392.239796       | 782.488299     | 391.747788       | 8 |
| 3 | <b>228.134268</b> | 114.570772      |                |                  | A    | <b>743.477400</b> | 372.242338      | 726.450851     | 363.729064       | 725.466835     | 363.237056       | 7 |
| 4 | <b>341.218332</b> | 171.112804      |                |                  | L    | <b>672.440286</b> | 336.723781      | 655.413737     | 328.210507       | 654.429721     | 327.718499       | 6 |
| 5 | <b>412.255446</b> | 206.631361      |                |                  | A    | <b>559.356222</b> | 280.181749      | 542.329673     | 271.668475       | 541.345657     | 271.176467       | 5 |

|   |            |            |            |            |   |            |            |            |            |            |            |   |
|---|------------|------------|------------|------------|---|------------|------------|------------|------------|------------|------------|---|
| 6 | 499.287474 | 250.147375 | 481.276909 | 241.142092 | S | 488.319108 | 244.663192 | 471.292559 | 236.149917 | 470.308543 | 235.657909 | 4 |
| 7 | 612.371538 | 306.689407 | 594.360973 | 297.684125 | L | 401.287080 | 201.147178 | 384.260531 | 192.633903 |            |            | 3 |
| 8 | 725.455602 | 363.231439 | 707.445037 | 354.226157 | I | 288.203016 | 144.605146 | 271.176467 | 136.091871 |            |            | 2 |
| 9 |            |            |            |            | R | 175.118952 | 88.063114  | 158.092403 | 79.549839  |            |            | 1 |

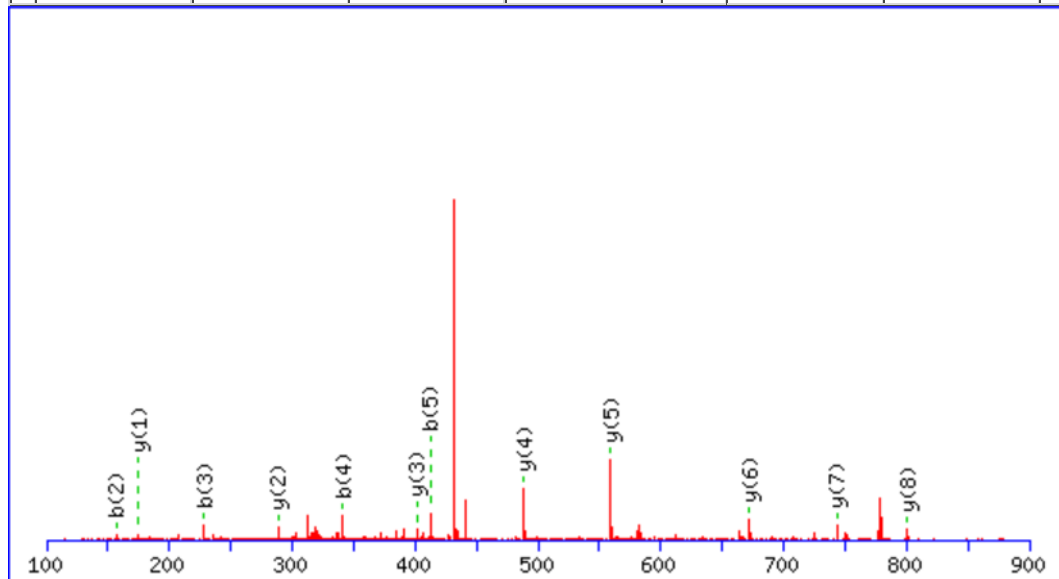

## Peptide View

MS/MS Fragmentation of **FYTIELKVE**

Found in **IPI00022974**, Tax\_Id=9606 Gene\_Symbol=PIP Prolactin-inducible protein

**Experiment:** 01 - S\_A-1 **Fraction:** S\_A-1

Match to Query 6788: 1253.691048 from(627.852800,2+)

Title: OECHL100310\_09.18767.18767.2.dta

Data file \\BOROMIR\Masse\Data LTQ-Orbitrap\Chrystelle Lacroix\Etude clinique sJPU\OECHL100310\_09.raw

**Monoisotopic mass of neutral peptide Mr(calc):** 1253.690720 **Fixed modifications:** Carbamidomethyl (C) (apply to specified residues or termini only) **Ions**

**Score:** 54 **Expect:** 0.00018 **Matches :** 11/86 fragment ions using 11 most intense peaks ([help](#))

| # | b          | b <sup>++</sup> | b <sup>*</sup> | b <sup>*++</sup> | b <sup>0</sup> | b <sup>0++</sup> | Seq. | y | y <sup>++</sup> | y <sup>*</sup> | y <sup>*++</sup> | y <sup>0</sup> | y <sup>0++</sup> |
|---|------------|-----------------|----------------|------------------|----------------|------------------|------|---|-----------------|----------------|------------------|----------------|------------------|
| 1 | 148.075690 | 74.541483       |                |                  |                |                  | F    |   |                 |                |                  |                |                  |

|    |                    |            |             |            |             |                   |   |                    |            |             |            |             |          |
|----|--------------------|------------|-------------|------------|-------------|-------------------|---|--------------------|------------|-------------|------------|-------------|----------|
| 2  | 311.139019         | 156.073148 |             |            |             |                   | Y | <b>1107.629604</b> | 554.318440 | 1090.603055 | 545.805166 | 1089.619039 | 545.3131 |
| 3  | <b>412.186698</b>  | 206.596987 |             |            | 394.176133  | 197.591705        | T | <b>944.566275</b>  | 472.786776 | 927.539726  | 464.273501 | 926.555710  | 463.7814 |
| 4  | 525.270762         | 263.139019 |             |            | 507.260197  | 254.133737        | I | 843.518596         | 422.262936 | 826.492047  | 413.749662 | 825.508031  | 413.2576 |
| 5  | 654.313355         | 327.660316 |             |            | 636.302790  | 318.655033        | E | <b>730.434532</b>  | 365.720904 | 713.407983  | 357.207630 | 712.423967  | 356.7156 |
| 6  | 767.397419         | 384.202348 |             |            | 749.386854  | <b>375.197065</b> | I | 601.391939         | 301.199608 | 584.365390  | 292.686333 | 583.381374  | 292.1943 |
| 7  | <b>880.481483</b>  | 440.744380 |             |            | 862.470918  | 431.739097        | L | <b>488.307875</b>  | 244.657576 | 471.281326  | 236.144301 | 470.297310  | 235.6522 |
| 8  | <b>1008.576446</b> | 504.791861 | 991.549897  | 496.278587 | 990.565881  | 495.786579        | K | <b>375.223811</b>  | 188.115544 | 358.197262  | 179.602269 | 357.213246  | 179.1102 |
| 9  | <b>1107.644860</b> | 554.326068 | 1090.618311 | 545.812794 | 1089.634295 | 545.320786        | V | <b>247.128848</b>  | 124.068062 |             |            | 229.118283  | 115.0627 |
| 10 |                    |            |             |            |             |                   | E | 148.060434         | 74.533855  |             |            | 130.049869  | 65.5285  |

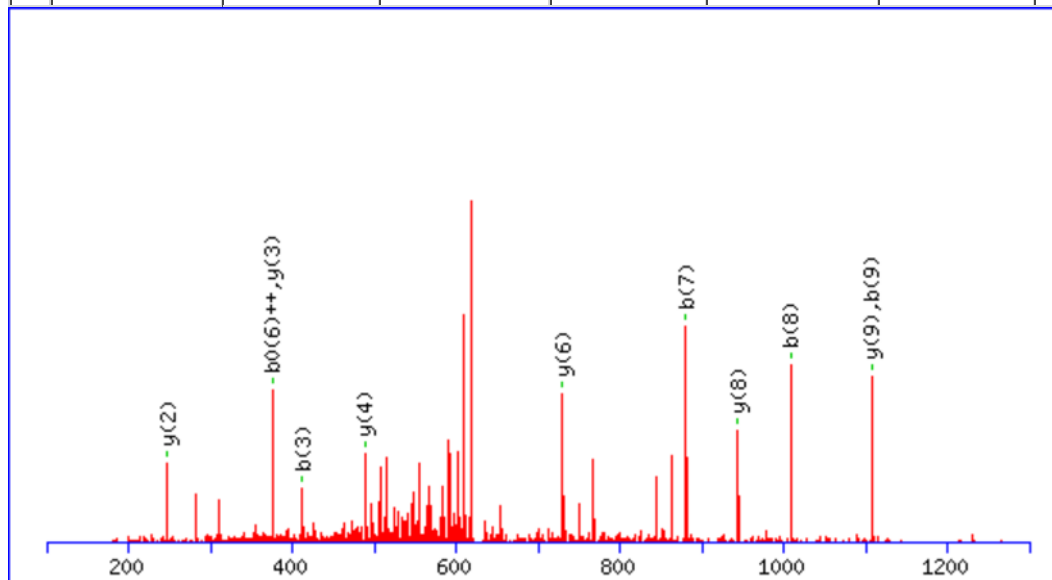

## Peptide View

MS/MS Fragmentation of **VFDKDGNGYISAAELR**

Found in **IPI00075248**, Tax\_Id=9606 Gene\_Symbol=CALM3;CALM2;CALM1 Calmodulin

Experiment: 01 - S\_A-1 Fraction: S\_A-1

Match to Query 12047: 1753.864448 from(877.939500,2+)

Title: OECHL100310\_09.13369.13369.2.dta

Data file \\BOROMIR\Masse\Data LTQ-Orbitrap\Chrystelle Lacroix\Etude clinique sJPU\OECHL100310\_09.raw

**Monoisotopic mass of neutral peptide Mr(calc): 1753.863495**Fixed modifications: Carbamidomethyl (C) (apply to specified residues or termini only)**Ions****Score: 69** **Expect: 1.6e-005**Matches : 44/166 fragment ions using 90 most intense peaks ([help](#))

| #  | b                  | b <sup>++</sup>   | b*                 | b <sup>*++</sup>  | b <sup>0</sup>     | b <sup>0++</sup> | Seq. | y                  | y <sup>++</sup>   | y*                 | y <sup>*++</sup>  | y <sup>0</sup> | y <sup>0++</sup> |
|----|--------------------|-------------------|--------------------|-------------------|--------------------|------------------|------|--------------------|-------------------|--------------------|-------------------|----------------|------------------|
| 1  | 100.075690         | 50.541483         |                    |                   |                    |                  | V    |                    |                   |                    |                   |                |                  |
| 2  | 247.144104         | 124.075690        |                    |                   |                    |                  | F    | 1655.802376        | 828.404826        | 1638.775827        | 819.891551        | 1637.791811    | 819.3995         |
| 3  | <b>362.171047</b>  | 181.589161        |                    |                   | 344.160482         | 172.583879       | D    | <b>1508.733962</b> | <b>754.870619</b> | 1491.707413        | <b>746.357345</b> | 1490.723397    | <b>745.8653</b>  |
| 4  | <b>490.266010</b>  | 245.636643        | 473.239461         | 237.123369        | 472.255445         | 236.631361       | K    | <b>1393.707019</b> | <b>697.357148</b> | <b>1376.680470</b> | <b>688.843873</b> | 1375.696454    | <b>688.3518</b>  |
| 5  | <b>605.292953</b>  | 303.150115        | 588.266404         | 294.636840        | <b>587.282388</b>  | 294.144832       | D    | <b>1265.612056</b> | 633.309666        | <b>1248.585507</b> | 624.796392        | 1247.601491    | 624.3043         |
| 6  | 662.314417         | 331.660847        | 645.287868         | 323.147572        | 644.303852         | 322.655564       | G    | <b>1150.585113</b> | 575.796194        | 1133.558564        | 567.282920        | 1132.574548    | 566.7909         |
| 7  | 776.357344         | 388.682310        | <b>759.330795</b>  | 380.169036        | 758.346779         | 379.677028       | N    | <b>1093.563649</b> | 547.285462        | 1076.537100        | 538.772188        | 1075.553084    | 538.2801         |
| 8  | 833.378808         | <b>417.193042</b> | <b>816.352259</b>  | 408.679768        | 815.368243         | 408.187760       | G    | <b>979.520722</b>  | <b>490.263999</b> | 962.494173         | 481.750724        | 961.510157     | 481.2587         |
| 9  | <b>996.442137</b>  | 498.724707        | <b>979.415588</b>  | <b>490.211432</b> | 978.431572         | 489.719424       | Y    | <b>922.499258</b>  | 461.753267        | 905.472709         | 453.239992        | 904.488693     | 452.7479         |
| 10 | 1109.526201        | 555.266738        | <b>1092.499652</b> | 546.753464        | 1091.515636        | 546.261456       | I    | <b>759.435929</b>  | 380.221603        | 742.409380         | 371.708328        | 741.425364     | 371.2163         |
| 11 | 1196.558229        | 598.782753        | <b>1179.531680</b> | 590.269478        | <b>1178.547664</b> | 589.777470       | S    | <b>646.351865</b>  | 323.679571        | 629.325316         | 315.166296        | 628.341300     | 314.6742         |
| 12 | <b>1267.595343</b> | 634.301310        | 1250.568794        | 625.788035        | 1249.584778        | 625.296027       | A    | <b>559.319837</b>  | 280.163557        | 542.293288         | 271.650282        | 541.309272     | 271.1582         |
| 13 | <b>1338.632457</b> | 669.819866        | 1321.605908        | 661.306592        | 1320.621892        | 660.814584       | A    | <b>488.282723</b>  | 244.644999        | 471.256174         | 236.131725        | 470.272158     | 235.6397         |
| 14 | <b>1467.675050</b> | 734.341163        | <b>1450.648501</b> | 725.827889        | <b>1449.664485</b> | 725.335881       | E    | <b>417.245609</b>  | 209.126442        | 400.219060         | 200.613168        | 399.235044     | 200.1211         |
| 15 | <b>1580.759114</b> | 790.883195        | <b>1563.732565</b> | 782.369921        | <b>1562.748549</b> | 781.877912       | L    | <b>288.203016</b>  | 144.605146        | 271.176467         | 136.091871        |                |                  |
| 16 |                    |                   |                    |                   |                    |                  | R    | 175.118952         | 88.063114         | 158.092403         | 79.549839         |                |                  |

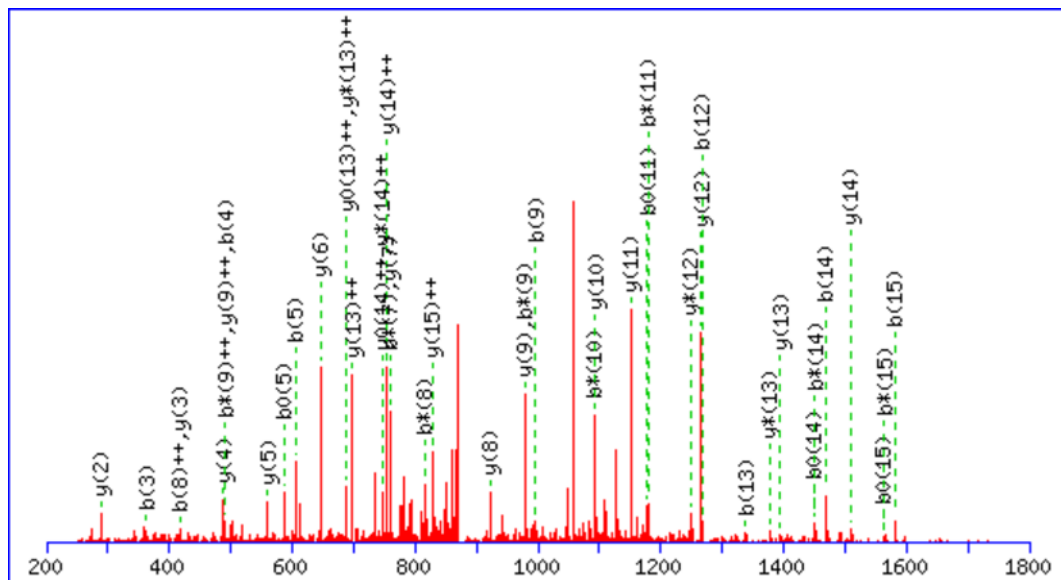

## Peptide View

MS/MS Fragmentation of **TATFAISILQIQLDLK**

Found in **IPI00025491**, Tax\_Id=9606 Gene\_Symbol=EIF4A1;SNORA67 Eukaryotic initiation factor 4A-I

**Experiment:** 01 - S\_A-1 **Fraction:** S\_A-1

Match to Query 13283: 1903.068448 from(952.541500,2+)

Title: OECHL100310\_09.21487.21487.2.dta

Data file \\BOROMIR\Masse\Data LTQ-Orbitrap\Chrystelle Lacroix\Etude clinique sJPU\OECHL100310\_09.raw

**Monoisotopic mass of neutral peptide Mr(calc):** 1903.066605 **Fixed modifications:** Carbamidomethyl (C) (apply to specified residues or termini only) **Ions**

**Score:** 53 **Expect:** 0.00017 **Matches :** 23/170 fragment ions using 46 most intense peaks ([help](#))

| # | b          | b <sup>++</sup> | b* | b <sup>*++</sup> | b <sup>0</sup>    | b <sup>0++</sup> | Seq. | y           | y <sup>++</sup> | y*          | y <sup>*++</sup> | y <sup>0</sup> | y <sup>0++</sup> |
|---|------------|-----------------|----|------------------|-------------------|------------------|------|-------------|-----------------|-------------|------------------|----------------|------------------|
| 1 | 102.054955 | 51.531116       |    |                  | 84.044390         | 42.525833        | T    |             |                 |             |                  |                |                  |
| 2 | 173.092069 | 87.049672       |    |                  | 155.081504        | 78.044390        | A    | 1803.026229 | 902.016752      | 1785.999680 | 893.503478       | 1785.015664    | 893.0114         |
| 3 | 274.139748 | 137.573512      |    |                  | 256.129183        | 128.568230       | T    | 1731.989115 | 866.498195      | 1714.962566 | 857.984921       | 1713.978550    | 857.4929         |
| 4 | 421.208162 | 211.107719      |    |                  | 403.197597        | 202.102436       | F    | 1630.941436 | 815.974356      | 1613.914887 | 807.461081       | 1612.930871    | 806.9690         |
| 5 | 492.245276 | 246.626276      |    |                  | <b>474.234711</b> | 237.620993       | A    | 1483.873022 | 742.440149      | 1466.846473 | 733.926875       | 1465.862457    | 733.4348         |



|    |             |            |             |            |             |            |   |             |            |             |            |             |          |
|----|-------------|------------|-------------|------------|-------------|------------|---|-------------|------------|-------------|------------|-------------|----------|
| 6  | 605.329340  | 303.168308 |             |            | 587.318775  | 294.163026 | I | 1412.835908 | 706.921592 | 1395.809359 | 698.408317 | 1394.825343 | 697.9163 |
| 7  | 692.361368  | 346.684322 |             |            | 674.350803  | 337.679039 | S | 1299.751844 | 650.379560 | 1282.725295 | 641.866286 | 1281.741279 | 641.3742 |
| 8  | 805.445432  | 403.226354 |             |            | 787.434867  | 394.221071 | I | 1212.719816 | 606.863546 | 1195.693267 | 598.350272 | 1194.709251 | 597.8582 |
| 9  | 918.529496  | 459.768386 |             |            | 900.518931  | 450.763104 | L | 1099.635752 | 550.321514 | 1082.609203 | 541.808240 | 1081.625187 | 541.3162 |
| 10 | 1046.588074 | 523.797675 | 1029.561525 | 515.284401 | 1028.577509 | 514.792393 | Q | 986.551688  | 493.779482 | 969.525139  | 485.266207 | 968.541123  | 484.7741 |
| 11 | 1174.646652 | 587.826964 | 1157.620103 | 579.313690 | 1156.636087 | 578.821682 | Q | 858.493110  | 429.750193 | 841.466561  | 421.236918 | 840.482545  | 420.7449 |
| 12 | 1287.730716 | 644.368996 | 1270.704167 | 635.855722 | 1269.720151 | 635.363714 | I | 730.434532  | 365.720904 | 713.407983  | 357.207629 | 712.423967  | 356.7156 |
| 13 | 1416.773309 | 708.890292 | 1399.746760 | 700.377018 | 1398.762744 | 699.885010 | E | 617.350468  | 309.178872 | 600.323919  | 300.665597 | 599.339903  | 300.1735 |
| 14 | 1529.857373 | 765.432324 | 1512.830824 | 756.919050 | 1511.846808 | 756.427042 | L | 488.307875  | 244.657575 | 471.281326  | 236.144301 | 470.297310  | 235.6522 |
| 15 | 1644.884316 | 822.945796 | 1627.857767 | 814.432522 | 1626.873751 | 813.940513 | D | 375.223811  | 188.115543 | 358.197262  | 179.602269 | 357.213246  | 179.1102 |
| 16 | 1757.968380 | 879.487828 | 1740.941831 | 870.974553 | 1739.957815 | 870.482545 | L | 260.196868  | 130.602072 | 243.170319  | 122.088797 |             |          |
| 17 |             |            |             |            |             |            | K | 147.112804  | 74.060040  | 130.086255  | 65.546765  |             |          |

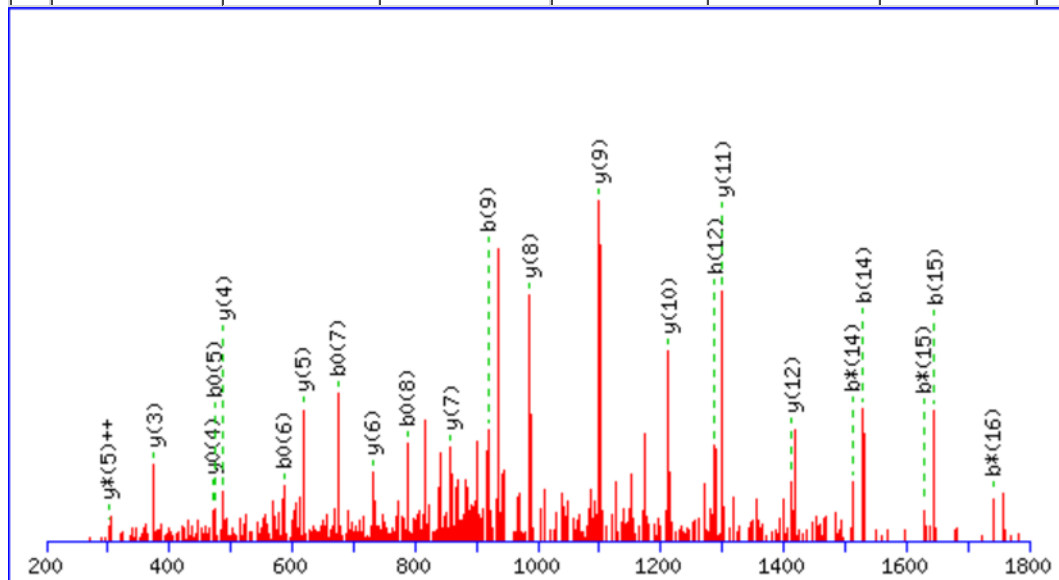

## Peptide View

MS/MS Fragmentation of **AQLVEEWANSVKK**

Found in **IPI00016150**, Tax\_Id=9606 Gene\_Symbol=SERPINI1 Neuroserpin

**Experiment:** 01 - S\_A-1 **Fraction:** S\_A-1

Match to Query 9602: 1500.793648 from(751.404100,2+)

Title: OECHL100310\_09.14186.14186.2.dta

Data file \\BOROMIR\Masse\Data LTQ-Orbitrap\Chrystelle Lacroix\Etude clinique sJPU\OECHL100310\_09.raw

**Monoisotopic mass of neutral peptide Mr(calc):** 1500.793610**Fixed modifications:** Carbamidomethyl (C) (apply to specified residues or termini only)**Ions**

**Score:** 63 **Expect:** 4.9e-005**Matches :** 19/128 fragment ions using 39 most intense peaks ([help](#))

| #  | b                  | b <sup>++</sup> | b*          | b <sup>*++</sup> | b <sup>0</sup>     | b <sup>0++</sup> | Seq. | y                  | y <sup>++</sup>   | y*          | y <sup>*++</sup> | y <sup>0</sup> | y <sup>0++</sup> |
|----|--------------------|-----------------|-------------|------------------|--------------------|------------------|------|--------------------|-------------------|-------------|------------------|----------------|------------------|
| 1  | 72.044390          | 36.525833       |             |                  |                    |                  | A    |                    |                   |             |                  |                |                  |
| 2  | 200.102968         | 100.555122      | 183.076419  | 92.041848        |                    |                  | Q    | 1430.763805        | 715.885541        | 1413.737256 | 707.372266       | 1412.753240    | 706.8802         |
| 3  | <b>313.187032</b>  | 157.097154      | 296.160483  | 148.583879       |                    |                  | L    | <b>1302.705227</b> | <b>651.856252</b> | 1285.678678 | 643.342977       | 1284.694662    | 642.8509         |
| 4  | <b>412.255446</b>  | 206.631361      | 395.228897  | 198.118087       |                    |                  | V    | <b>1189.621163</b> | <b>595.314220</b> | 1172.594614 | 586.800945       | 1171.610598    | 586.3089         |
| 5  | 541.298039         | 271.152658      | 524.271490  | 262.639383       | 523.287474         | 262.147375       | E    | <b>1090.552749</b> | <b>545.780013</b> | 1073.526200 | 537.266738       | 1072.542184    | 536.7747         |
| 6  | 670.340632         | 335.673954      | 653.314083  | 327.160680       | <b>652.330067</b>  | 326.668672       | E    | <b>961.510156</b>  | 481.258716        | 944.483607  | 472.745442       | 943.499591     | <b>472.2534</b>  |
| 7  | 856.419945         | 428.713611      | 839.393396  | 420.200336       | 838.409380         | 419.708328       | W    | <b>832.467563</b>  | 416.737420        | 815.441014  | 408.224145       | 814.456998     | 407.7321         |
| 8  | 927.457059         | 464.232168      | 910.430510  | 455.718893       | 909.446494         | 455.226885       | A    | <b>646.388250</b>  | 323.697763        | 629.361701  | 315.184489       | 628.377685     | 314.6924         |
| 9  | 1041.499986        | 521.253631      | 1024.473437 | 512.740357       | 1023.489421        | 512.248349       | N    | <b>575.351136</b>  | 288.179206        | 558.324587  | 279.665932       | 557.340571     | 279.1739         |
| 10 | 1128.532014        | 564.769645      | 1111.505465 | 556.256371       | 1110.521449        | 555.764363       | S    | <b>461.308209</b>  | 231.157743        | 444.281660  | 222.644468       | 443.297644     | 222.1524         |
| 11 | <b>1227.600428</b> | 614.303852      | 1210.573879 | 605.790578       | <b>1209.589863</b> | 605.298570       | V    | <b>374.276181</b>  | 187.641729        | 357.249632  | 179.128454       |                |                  |
| 12 | 1355.695391        | 678.351334      | 1338.668842 | 669.838059       | 1337.684826        | 669.346051       | K    | <b>275.207767</b>  | 138.107521        | 258.181218  | 129.594247       |                |                  |
| 13 |                    |                 |             |                  |                    |                  | K    | 147.112804         | 74.060040         | 130.086255  | 65.546765        |                |                  |

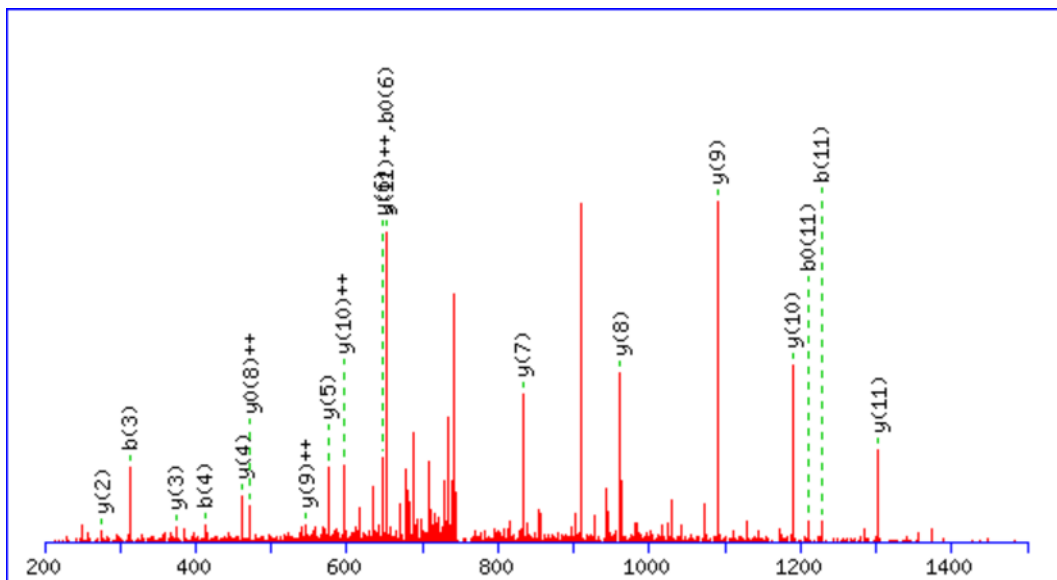

## Peptide View

MS/MS Fragmentation of **LLYDASNLETGVPSR**

Found in **IPI00003111**, Tax\_Id=9606 Gene\_Symbol=LOC652694 Ig kappa chain V-I region AU

**Experiment:** 01 - S\_A-1 **Fraction:** S\_A-1

Match to Query 11975: 1746.916848 from(874.465700,2+)

Title: OECHL100310\_09.16728.16728.2.dta

Data file \\BOROMIR\Masse\Data LTQ-Orbitrap\Chrystelle Lacroix\Etude clinique sJPU\OECHL100310\_09.raw

**Monoisotopic mass of neutral peptide Mr(calc):** 1746.915192 **Fixed modifications:** Carbamidomethyl (C) (apply to specified residues or termini only) **Ions**

**Score:** 62 **Expect:** 6.1e-005 **Matches :** 27/156 fragment ions using 56 most intense peaks ([help](#))

| # | b                 | b <sup>++</sup> | b* | b <sup>*++</sup> | b <sup>0</sup> | b <sup>0++</sup> | Seq. | y                  | y <sup>++</sup>   | y*                 | y <sup>*++</sup> | y <sup>0</sup>     | y <sup>0++</sup> |
|---|-------------------|-----------------|----|------------------|----------------|------------------|------|--------------------|-------------------|--------------------|------------------|--------------------|------------------|
| 1 | 114.091340        | 57.549308       |    |                  |                |                  | L    |                    |                   |                    |                  |                    |                  |
| 2 | 227.175404        | 114.091340      |    |                  |                |                  | L    | 1634.838427        | 817.922852        | 1617.811878        | 809.409577       | 1616.827862        | 808.9175         |
| 3 | 340.259468        | 170.633372      |    |                  |                |                  | I    | <b>1521.754363</b> | 761.380820        | 1504.727814        | 752.867545       | 1503.743798        | 752.3755         |
| 4 | 503.322797        | 252.165036      |    |                  |                |                  | Y    | 1408.670299        | <b>704.838788</b> | <b>1391.643750</b> | 696.325513       | <b>1390.659734</b> | 695.8335         |
| 5 | <b>618.349740</b> | 309.678508      |    |                  | 600.339175     | 300.673226       | D    | <b>1245.606970</b> | 623.307123        | 1228.580421        | 614.793849       | 1227.596405        | 614.3018         |

|    |                    |                   |                    |            |             |            |   |                    |            |                   |            |                   |          |
|----|--------------------|-------------------|--------------------|------------|-------------|------------|---|--------------------|------------|-------------------|------------|-------------------|----------|
| 6  | <b>689.386854</b>  | 345.197065        |                    |            | 671.376289  | 336.191782 | A | <b>1130.580027</b> | 565.793652 | 1113.553478       | 557.280377 | 1112.569462       | 556.7883 |
| 7  | 776.418882         | 388.713079        |                    |            | 758.408317  | 379.707796 | S | <b>1059.542913</b> | 530.275095 | 1042.516364       | 521.761820 | 1041.532348       | 521.2698 |
| 8  | 890.461809         | 445.734542        | 873.435260         | 437.221268 | 872.451244  | 436.729260 | N | <b>972.510885</b>  | 486.759081 | 955.484336        | 478.245806 | 954.500320        | 477.7537 |
| 9  | <b>1003.545873</b> | 502.276574        | 986.519324         | 493.763300 | 985.535308  | 493.271292 | L | <b>858.467958</b>  | 429.737617 | 841.441409        | 421.224343 | 840.457393        | 420.7323 |
| 10 | <b>1132.588466</b> | 566.797871        | 1115.561917        | 558.284597 | 1114.577901 | 557.792588 | E | <b>745.383894</b>  | 373.195585 | 728.357345        | 364.682311 | 727.373329        | 364.1903 |
| 11 | <b>1233.636145</b> | <b>617.321710</b> | <b>1216.609596</b> | 608.808436 | 1215.625580 | 608.316428 | T | <b>616.341301</b>  | 308.674289 | 599.314752        | 300.161014 | 598.330736        | 299.6690 |
| 12 | 1290.657609        | 645.832442        | <b>1273.631060</b> | 637.319168 | 1272.647044 | 636.827160 | G | <b>515.293622</b>  | 258.150449 | 498.267073        | 249.637175 | 497.283057        | 249.1451 |
| 13 | <b>1389.726023</b> | 695.366649        | <b>1372.699474</b> | 686.853375 | 1371.715458 | 686.361367 | V | <b>458.272158</b>  | 229.639717 | 441.245609        | 221.126443 | 440.261593        | 220.6344 |
| 14 | 1486.778787        | 743.893032        | 1469.752238        | 735.379757 | 1468.768222 | 734.887749 | P | <b>359.203744</b>  | 180.105510 | <b>342.177195</b> | 171.592236 | <b>341.193179</b> | 171.1002 |
| 15 | <b>1573.810815</b> | 787.409046        | 1556.784266        | 778.895771 | 1555.800250 | 778.403763 | S | 262.150980         | 131.579128 | 245.124431        | 123.065854 | 244.140415        | 122.5738 |
| 16 |                    |                   |                    |            |             |            | R | 175.118952         | 88.063114  | 158.092403        | 79.549839  |                   |          |

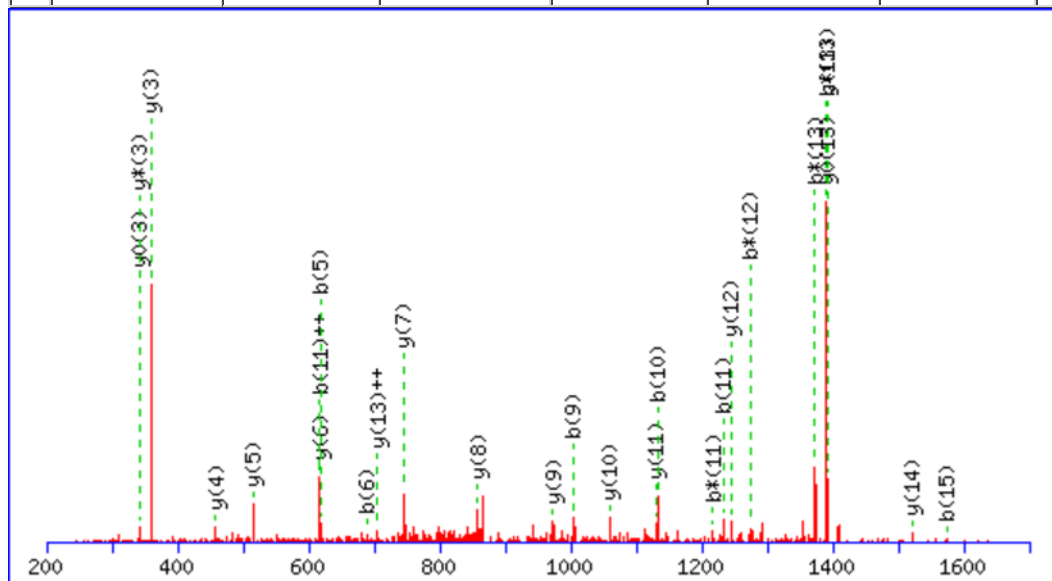

## Peptide View

MS/MS Fragmentation of **ALVQIVK**

Found in **IPI00216569**, Tax\_Id=9606 Gene\_Symbol=CST7 Cystatin-F precursor

**Experiment:** 01 - S\_A-1 **Fraction:** S\_A-1

Match to Query 727: 770.490248 from(386.252400,2+)

Title: OECHL100310\_09.11669.11669.2.dta

Data file \\BOROMIR\Masse\Data LTQ-Orbitrap\Chrystelle Lacroix\Etude clinique sJPU\OECHL100310\_09.raw

**Monoisotopic mass of neutral peptide Mr(calc):** 770.490173 **Fixed modifications:** Carbamidomethyl (C) (apply to specified residues or termini only) **Variable modifications:** Q4 : Deamidated (NQ) **Ions Score:** 51 **Expect:** 0.00032 **Matches :** 12/42 fragment ions using 20 most intense peaks ([help](#))

| # | b                 | b <sup>++</sup> | b*         | b <sup>*++</sup> | Seq. | y                 | y <sup>++</sup>   | y*         | y <sup>*++</sup> | # |
|---|-------------------|-----------------|------------|------------------|------|-------------------|-------------------|------------|------------------|---|
| 1 | 72.044390         | 36.525833       |            |                  | A    |                   |                   |            |                  | 7 |
| 2 | <b>185.128454</b> | 93.067865       |            |                  | L    | <b>700.460354</b> | <b>350.733815</b> | 683.433805 | 342.220541       | 6 |
| 3 | <b>284.196868</b> | 142.602072      |            |                  | V    | <b>587.376290</b> | <b>294.191783</b> | 570.349741 | 285.678509       | 5 |
| 4 | 413.239462        | 207.123369      | 396.212913 | 198.610095       | Q    | <b>488.307876</b> | 244.657576        | 471.281327 | 236.144301       | 4 |
| 5 | <b>526.323526</b> | 263.665401      | 509.296977 | 255.152127       | I    | <b>359.265282</b> | 180.136279        | 342.238733 | 171.623004       | 3 |
| 6 | <b>625.391940</b> | 313.199608      | 608.365391 | 304.686333       | V    | <b>246.181218</b> | 123.594247        | 229.154669 | 115.080972       | 2 |
| 7 |                   |                 |            |                  | K    | <b>147.112804</b> | 74.060040         | 130.086255 | 65.546765        | 1 |

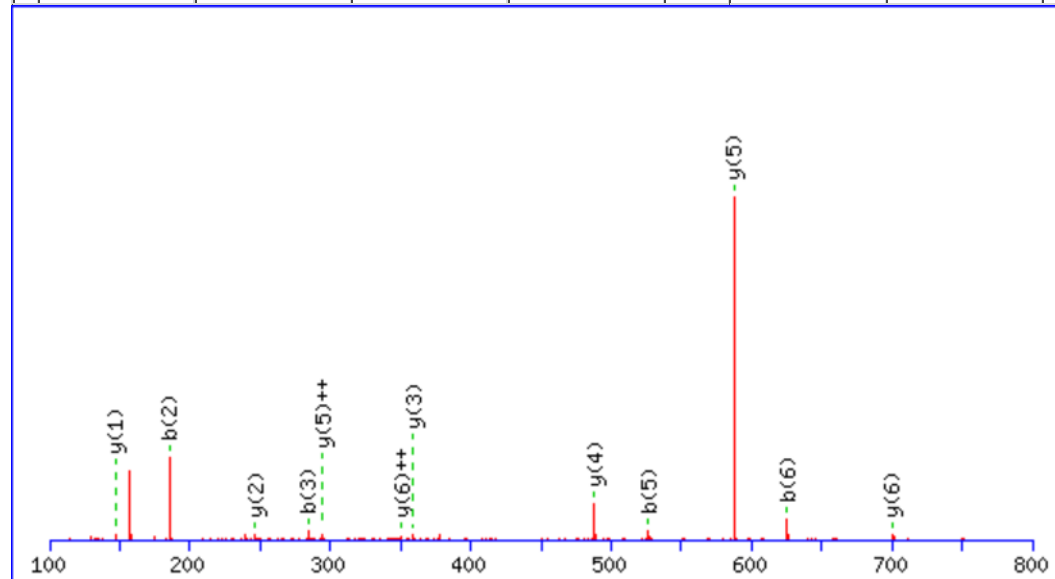**Peptide View**

MS/MS Fragmentation of **IGGIGTVPVGR**Found in **IPI00014424**, Tax\_Id=9606 Gene\_Symbol=EEF1A2 Elongation factor 1-alpha 2**Experiment:** 01 - S\_A-1 **Fraction:** S\_A-1

Match to Query 3233: 1024.603248 from(513.308900,2+)

Title: OECHL100310\_09.10897.10897.2.dta

Data file \\BOROMIR\Masse\Data LTQ-Orbitrap\Chrystelle Lacroix\Etude clinique sJPU\OECHL100310\_09.raw

**Monoisotopic mass of neutral peptide Mr(calc):** 1024.602951 **Fixed modifications:** Carbamidomethyl (C) (apply to specified residues or termini only) **Ions****Score:** 59 **Expect:** 3.6e-005 **Matches :** 25/80 fragment ions using 45 most intense peaks ([help](#))

| #  | b          | b <sup>++</sup> | b <sup>0</sup> | b <sup>0++</sup> | Seq. | y          | y <sup>++</sup> | y*         | y <sup>*++</sup> | y <sup>0</sup> | y <sup>0++</sup> | #  |
|----|------------|-----------------|----------------|------------------|------|------------|-----------------|------------|------------------|----------------|------------------|----|
| 1  | 114.091340 | 57.549308       |                |                  | I    |            |                 |            |                  |                |                  | 11 |
| 2  | 171.112804 | 86.060040       |                |                  | G    | 912.526143 | 456.766710      | 895.499594 | 448.253435       | 894.515578     | 447.761427       | 10 |
| 3  | 228.134268 | 114.570772      |                |                  | G    | 855.504679 | 428.255978      | 838.478130 | 419.742703       | 837.494114     | 419.250695       | 9  |
| 4  | 341.218332 | 171.112804      |                |                  | I    | 798.483215 | 399.745246      | 781.456666 | 391.231971       | 780.472650     | 390.739963       | 8  |
| 5  | 398.239796 | 199.623536      |                |                  | G    | 685.399151 | 343.203214      | 668.372602 | 334.689939       | 667.388586     | 334.197931       | 7  |
| 6  | 499.287475 | 250.147375      | 481.276910     | 241.142093       | T    | 628.377687 | 314.692482      | 611.351138 | 306.179207       | 610.367122     | 305.687199       | 6  |
| 7  | 598.355889 | 299.681583      | 580.345324     | 290.676300       | V    | 527.330008 | 264.168642      | 510.303459 | 255.655368       |                |                  | 5  |
| 8  | 695.408653 | 348.207965      | 677.398088     | 339.202682       | P    | 428.261594 | 214.634435      | 411.235045 | 206.121161       |                |                  | 4  |
| 9  | 794.477067 | 397.742172      | 776.466502     | 388.736889       | V    | 331.208830 | 166.108053      | 314.182281 | 157.594779       |                |                  | 3  |
| 10 | 851.498531 | 426.252904      | 833.487966     | 417.247621       | G    | 232.140416 | 116.573846      | 215.113867 | 108.060572       |                |                  | 2  |
| 11 |            |                 |                |                  | R    | 175.118952 | 88.063114       | 158.092403 | 79.549840        |                |                  | 1  |

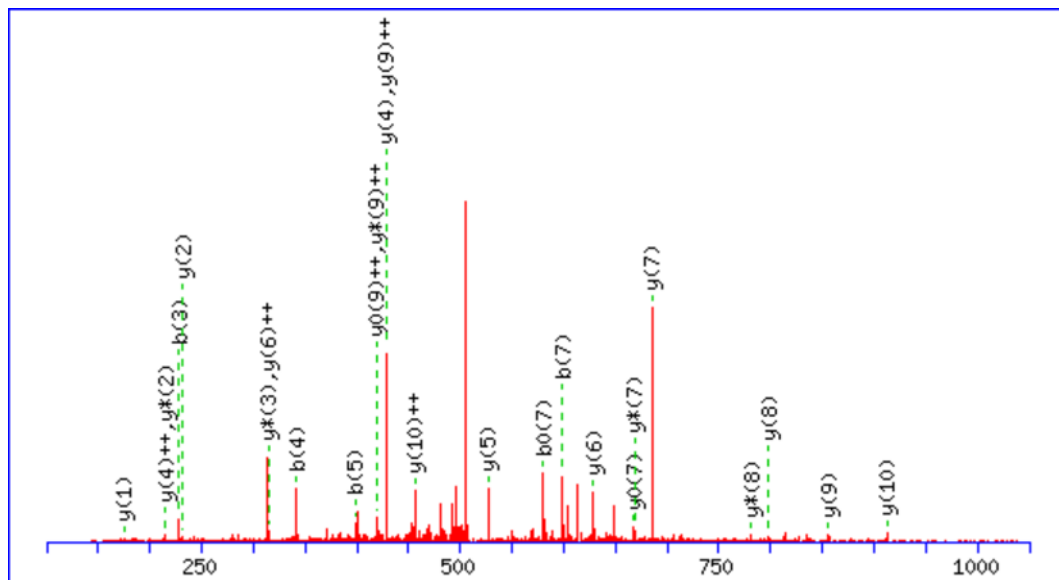

## Peptide View

MS/MS Fragmentation of **ADLAAQYTTVGR**

Found in **IPI00019988**, Tax\_Id=9606 Gene\_Symbol=SGSH N-sulphoglucosamine sulphohydrolase

**Experiment:** 01 - S\_A-1 **Fraction:** S\_A-1

Match to Query 6912: 1264.641448 from(633.328000,2+)

Title: OECHL100310\_09.10654.10654.2.dta

Data file \\BOROMIR\Masse\Data LTQ-Orbitrap\Chrystelle Lacroix\Etude clinique sJPU\OECHL100310\_09.raw

**Monoisotopic mass of neutral peptide Mr(calc):** 1264.641159 **Fixed modifications:** Carbamidomethyl (C) (apply to specified residues or termini only) **Ions**

**Score:** 57 **Expect:** 0.00015 **Matches :** 20/114 fragment ions using 33 most intense peaks ([help](#))

| # | b                 | b <sup>++</sup> | b <sup>*</sup> | b <sup>*++</sup> | b <sup>0</sup> | b <sup>0++</sup> | Seq. | y                 | y <sup>++</sup>   | y <sup>*</sup> | y <sup>*++</sup> | y <sup>0</sup> | y <sup>0++</sup> |
|---|-------------------|-----------------|----------------|------------------|----------------|------------------|------|-------------------|-------------------|----------------|------------------|----------------|------------------|
| 1 | 72.044390         | 36.525833       |                |                  |                |                  | A    |                   |                   |                |                  |                |                  |
| 2 | 187.071333        | 94.039304       |                |                  | 169.060768     | 85.034022        | D    | 1194.611330       | 597.809303        | 1177.584781    | 589.296029       | 1176.600765    | 588.8040         |
| 3 | <b>300.155397</b> | 150.581336      |                |                  | 282.144832     | 141.576054       | L    | 1079.584387       | <b>540.295832</b> | 1062.557838    | 531.782557       | 1061.573822    | 531.2905         |
| 4 | <b>371.192511</b> | 186.099894      |                |                  | 353.181946     | 177.094611       | A    | <b>966.500323</b> | 483.753800        | 949.473774     | 475.240525       | 948.489758     | 474.7485         |
| 5 | <b>442.229625</b> | 221.618450      |                |                  | 424.219060     | 212.613168       | A    | <b>895.463209</b> | 448.235243        | 878.436660     | 439.721968       | 877.452644     | 439.2299         |

|    |                    |            |                    |            |                    |            |          |                   |            |            |            |                   |          |
|----|--------------------|------------|--------------------|------------|--------------------|------------|----------|-------------------|------------|------------|------------|-------------------|----------|
| 6  | <b>570.288203</b>  | 285.647740 | 553.261654         | 277.134465 | 552.277638         | 276.642457 | <b>Q</b> | <b>824.426095</b> | 412.716686 | 807.399546 | 404.203411 | 806.415530        | 403.7114 |
| 7  | <b>733.351532</b>  | 367.179404 | 716.324983         | 358.666130 | 715.340967         | 358.174122 | <b>Y</b> | <b>696.367517</b> | 348.687397 | 679.340968 | 340.174122 | 678.356952        | 339.6821 |
| 8  | <b>834.399211</b>  | 417.703244 | 817.372662         | 409.189969 | 816.388646         | 408.697961 | <b>T</b> | <b>533.304188</b> | 267.155732 | 516.277639 | 258.642458 | 515.293623        | 258.1504 |
| 9  | 935.446890         | 468.227083 | 918.420341         | 459.713809 | 917.436325         | 459.221801 | <b>T</b> | <b>432.256509</b> | 216.631892 | 415.229960 | 208.118618 | <b>414.245944</b> | 207.6266 |
| 10 | <b>1034.515304</b> | 517.761290 | <b>1017.488755</b> | 509.248016 | <b>1016.504739</b> | 508.756008 | <b>V</b> | <b>331.208830</b> | 166.108053 | 314.182281 | 157.594778 |                   |          |
| 11 | <b>1091.536768</b> | 546.272022 | 1074.510219        | 537.758748 | 1073.526203        | 537.266740 | <b>G</b> | <b>232.140416</b> | 116.573846 | 215.113867 | 108.060571 |                   |          |
| 12 |                    |            |                    |            |                    |            | <b>R</b> | 175.118952        | 88.063114  | 158.092403 | 79.549839  |                   |          |

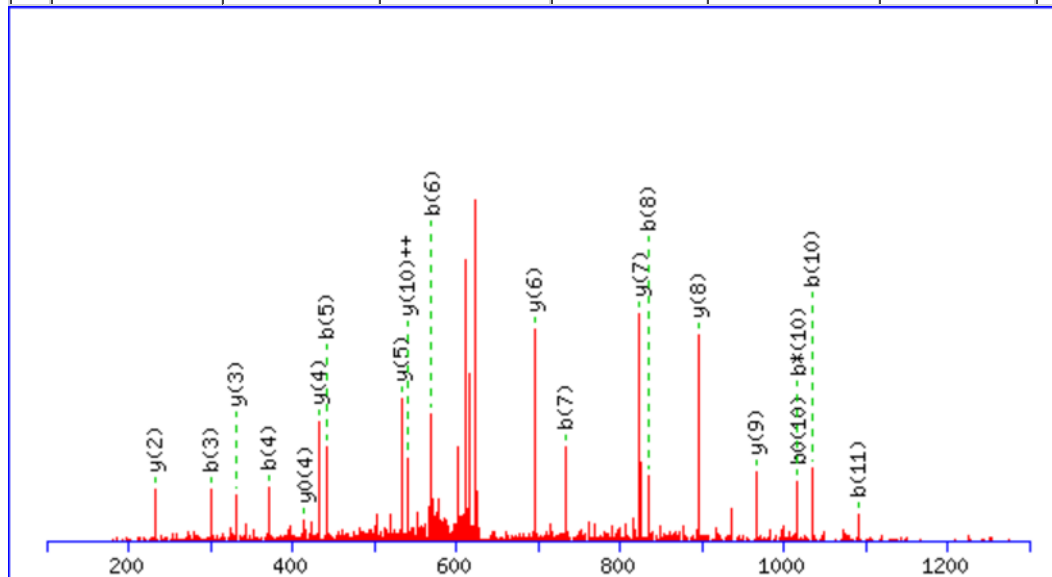

## Peptide View

MS/MS Fragmentation of **IESVLSSGKR**

Found in **IPI00018236**, Tax\_Id=9606 Gene\_Symbol=GM2A Ganglioside GM2 activator

**Experiment:** 01 - S\_A-1 **Fraction:** S\_A-1

Match to Query 5316: 1161.635648 from(581.825100,2+)

Title: OECHL100310\_09.5341.5341.2.dta

Data file \\BOROMIR\Masse\Data LTQ-Orbitrap\Chrystelle Lacroix\Etude clinique sJPU\OECHL100310\_09.raw

**Monoisotopic mass of neutral peptide Mr(calc):** 1161.635330 **Fixed modifications:** Carbamidomethyl (C) (apply to specified residues or termini only) **Ions**



Score: 55 Expect: 0.0002 Matches : 25/94 fragment ions using 40 most intense peaks (help)

| #  | b                 | b <sup>++</sup>   | b*         | b <sup>*++</sup> | b <sup>0</sup>    | b <sup>0++</sup> | Seq. | y                  | y <sup>++</sup>   | y*                | y <sup>*++</sup>  | y <sup>0</sup>    | y <sup>0++</sup>  |
|----|-------------------|-------------------|------------|------------------|-------------------|------------------|------|--------------------|-------------------|-------------------|-------------------|-------------------|-------------------|
| 1  | 114.091340        | 57.549308         |            |                  |                   |                  | I    |                    |                   |                   |                   |                   |                   |
| 2  | <b>243.133933</b> | 122.070605        |            |                  | 225.123368        | 113.065322       | E    | <b>1049.558562</b> | <b>525.282919</b> | 1032.532013       | 516.769645        | 1031.547997       | 516.277637        |
| 3  | <b>330.165961</b> | 165.586618        |            |                  | <b>312.155396</b> | 156.581336       | S    | <b>920.515969</b>  | <b>460.761623</b> | <b>903.489420</b> | <b>452.248348</b> | <b>902.505404</b> | <b>451.756340</b> |
| 4  | <b>429.234375</b> | <b>215.120826</b> |            |                  | <b>411.223810</b> | 206.115543       | V    | <b>833.483941</b>  | 417.245609        | 816.457392        | 408.732334        | 815.473376        | 408.240326        |
| 5  | 542.318439        | 271.662858        |            |                  | <b>524.307874</b> | 262.657575       | L    | <b>734.415527</b>  | <b>367.711402</b> | 717.388978        | 359.198127        | 716.404962        | 358.706119        |
| 6  | 629.350467        | 315.178872        |            |                  | 611.339902        | 306.173589       | S    | <b>621.331463</b>  | 311.169370        | 604.304914        | 302.656095        | 603.320898        | 302.164087        |
| 7  | 716.382495        | 358.694886        |            |                  | 698.371930        | 349.689603       | S    | <b>534.299435</b>  | 267.653356        | 517.272886        | 259.140081        | 516.288870        | 258.648073        |
| 8  | 803.414523        | 402.210899        |            |                  | 785.403958        | 393.205617       | S    | 447.267407         | 224.137342        | 430.240858        | 215.624067        | <b>429.256842</b> | <b>215.132059</b> |
| 9  | 860.435987        | 430.721632        |            |                  | 842.425422        | 421.716349       | G    | <b>360.235379</b>  | 180.621328        | 343.208830        | 172.108053        |                   |                   |
| 10 | <b>988.530950</b> | 494.769113        | 971.504401 | 486.255838       | 970.520385        | 485.763830       | K    | 303.213915         | 152.110596        | 286.187366        | 143.597321        |                   |                   |
| 11 |                   |                   |            |                  |                   |                  | R    | <b>175.118952</b>  | 88.063114         | 158.092403        | 79.549840         |                   |                   |

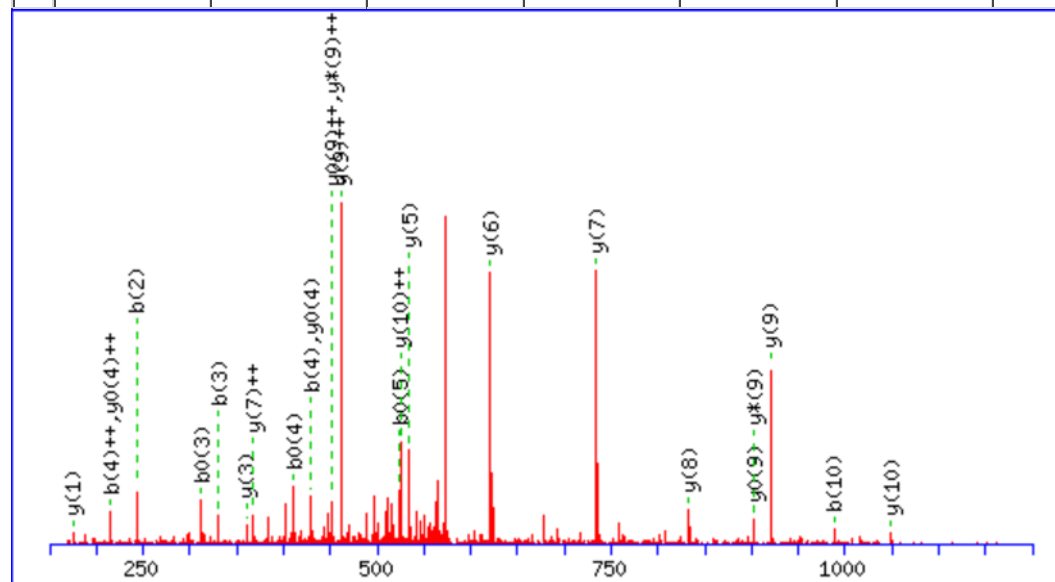

## Peptide View

MS/MS Fragmentation of **GLAEAAGPR**Found in **IPI00290826**, Tax\_Id=9606 Gene\_Symbol=FAM174A Membrane protein FAM174A**Experiment:** 01 - S\_A-1 **Fraction:** S\_A-1

Match to Query 1135: 840.445048 from(421.229800,2+)

Title: OECHL100310\_09.4013.4013.2.dta

Data file \\BOROMIR\Masse\Data LTQ-Orbitrap\Chrystelle Lacroix\Etude clinique sJPU\OECHL100310\_09.raw

**Monoisotopic mass of neutral peptide Mr(calc):** 840.445343**Fixed modifications:** Carbamidomethyl (C) (apply to specified residues or termini only)**Ions Score:**51 **Expect:** 0.00045**Matches :** 10/64 fragment ions using 14 most intense peaks ([help](#))

| # | b                 | b <sup>++</sup> | b <sup>0</sup> | b <sup>0++</sup> | Seq.     | y                 | y <sup>++</sup> | y <sup>*</sup> | y <sup>*++</sup> | y <sup>0</sup> | y <sup>0++</sup> | #        |
|---|-------------------|-----------------|----------------|------------------|----------|-------------------|-----------------|----------------|------------------|----------------|------------------|----------|
| 1 | 58.028740         | 29.518008       |                |                  | <b>G</b> |                   |                 |                |                  |                |                  | <b>9</b> |
| 2 | <b>171.112804</b> | 86.060040       |                |                  | <b>L</b> | 784.431179        | 392.719228      | 767.404630     | 384.205953       | 766.420614     | 383.713945       | <b>8</b> |
| 3 | <b>242.149918</b> | 121.578597      |                |                  | <b>A</b> | <b>671.347115</b> | 336.177196      | 654.320566     | 327.663921       | 653.336550     | 327.171913       | <b>7</b> |
| 4 | 371.192511        | 186.099894      | 353.181946     | 177.094611       | <b>E</b> | <b>600.310001</b> | 300.658639      | 583.283452     | 292.145364       | 582.299436     | 291.653356       | <b>6</b> |
| 5 | 442.229625        | 221.618450      | 424.219060     | 212.613168       | <b>A</b> | <b>471.267408</b> | 236.137342      | 454.240859     | 227.624067       |                |                  | <b>5</b> |
| 6 | <b>513.266739</b> | 257.137008      | 495.256174     | 248.131725       | <b>A</b> | <b>400.230294</b> | 200.618785      | 383.203745     | 192.105510       |                |                  | <b>4</b> |
| 7 | <b>570.288203</b> | 285.647740      | 552.277638     | 276.642457       | <b>G</b> | <b>329.193180</b> | 165.100228      | 312.166631     | 156.586953       |                |                  | <b>3</b> |
| 8 | 667.340967        | 334.174122      | 649.330402     | 325.168839       | <b>P</b> | <b>272.171716</b> | 136.589496      | 255.145167     | 128.076221       |                |                  | <b>2</b> |
| 9 |                   |                 |                |                  | <b>R</b> | 175.118952        | 88.063114       | 158.092403     | 79.549839        |                |                  | <b>1</b> |

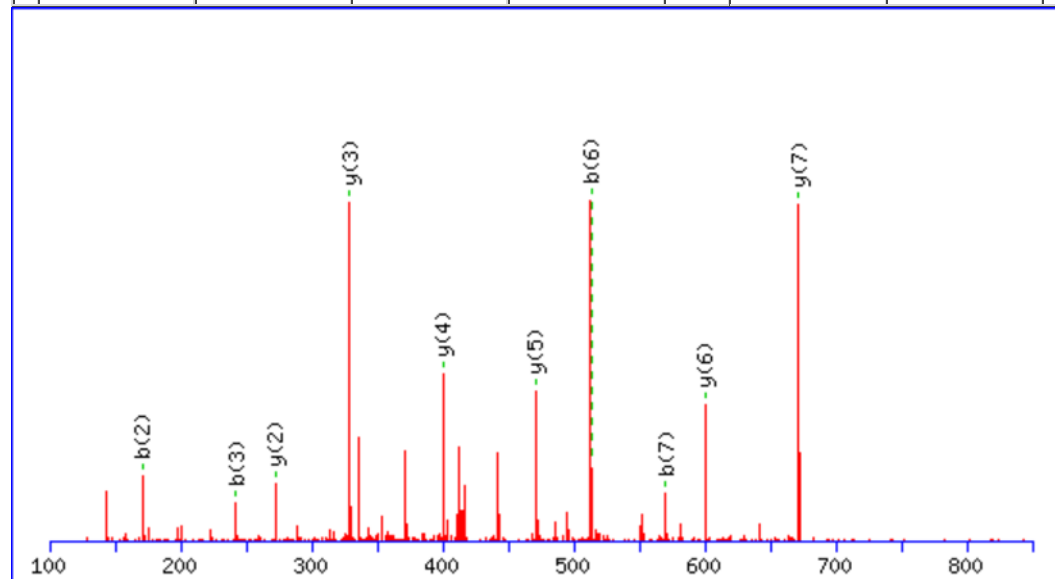

## Peptide View

MS/MS Fragmentation of **GNFNYIEFTR**

Found in **IPI00033494**, Tax\_Id=9606 Gene\_Symbol=MYL12B Myosin regulatory light chain 12B

Experiment: 50 - PyB-2 Fraction: PyB-2

Match to Query 7313: 1259.594848 from(630.804700,2+)

Title: OECHL100312\_24.15561.15561.2.dta

Data file \\Boromir\masse\Data LTQ-Orbitrap\Chrystelle Lacroix\Etude clinique sJPU\OECHL100312\_24.raw

**Monoisotopic mass of neutral peptide Mr(calc):** 1259.593475**Fixed modifications:** Carbamidomethyl (C) (apply to specified residues or termini only)**Ions**

**Score:** 71 **Expect:** 8.8e-006**Matches :** 11/92 fragment ions using 11 most intense peaks ([help](#))

| #  | b                 | b <sup>++</sup> | b*          | b* <sup>++</sup> | b <sup>0</sup> | b <sup>0++</sup> | Seq. | y                  | y <sup>++</sup>   | y*          | y* <sup>++</sup> | y <sup>0</sup> | y <sup>0++</sup> |
|----|-------------------|-----------------|-------------|------------------|----------------|------------------|------|--------------------|-------------------|-------------|------------------|----------------|------------------|
| 1  | 58.028740         | 29.518008       |             |                  |                |                  | G    |                    |                   |             |                  |                |                  |
| 2  | 172.071667        | 86.539471       | 155.045118  | 78.026197        |                |                  | N    | <b>1203.579299</b> | 602.293288        | 1186.552750 | 593.780013       | 1185.568734    | 593.2880         |
| 3  | <b>319.140081</b> | 160.073678      | 302.113532  | 151.560404       |                |                  | F    | <b>1089.536372</b> | 545.271824        | 1072.509823 | 536.758549       | 1071.525807    | 536.2665         |
| 4  | 433.183008        | 217.095142      | 416.156459  | 208.581867       |                |                  | N    | <b>942.467958</b>  | 471.737617        | 925.441409  | 463.224342       | 924.457393     | 462.7323         |
| 5  | 596.246337        | 298.626807      | 579.219788  | 290.113532       |                |                  | Y    | <b>828.425031</b>  | 414.716154        | 811.398482  | 406.202879       | 810.414466     | 405.7108         |
| 6  | <b>709.330401</b> | 355.168839      | 692.303852  | 346.655564       |                |                  | I    | 665.361702         | 333.184489        | 648.335153  | 324.671214       | 647.351137     | 324.1792         |
| 7  | 838.372994        | 419.690135      | 821.346445  | 411.176861       | 820.362429     | 410.684853       | E    | <b>552.277638</b>  | <b>276.642457</b> | 535.251089  | 268.129182       | 534.267073     | 267.6371         |
| 8  | <b>985.441408</b> | 493.224342      | 968.414859  | 484.711068       | 967.430843     | 484.219060       | F    | <b>423.235045</b>  | 212.121160        | 406.208496  | 203.607886       | 405.224480     | 203.1158         |
| 9  | 1086.489087       | 543.748181      | 1069.462538 | 535.234907       | 1068.478522    | 534.742899       | T    | <b>276.166631</b>  | 138.586953        | 259.140082  | 130.073679       | 258.156066     | 129.5816         |
| 10 |                   |                 |             |                  |                |                  | R    | 175.118952         | 88.063114         | 158.092403  | 79.549839        |                |                  |

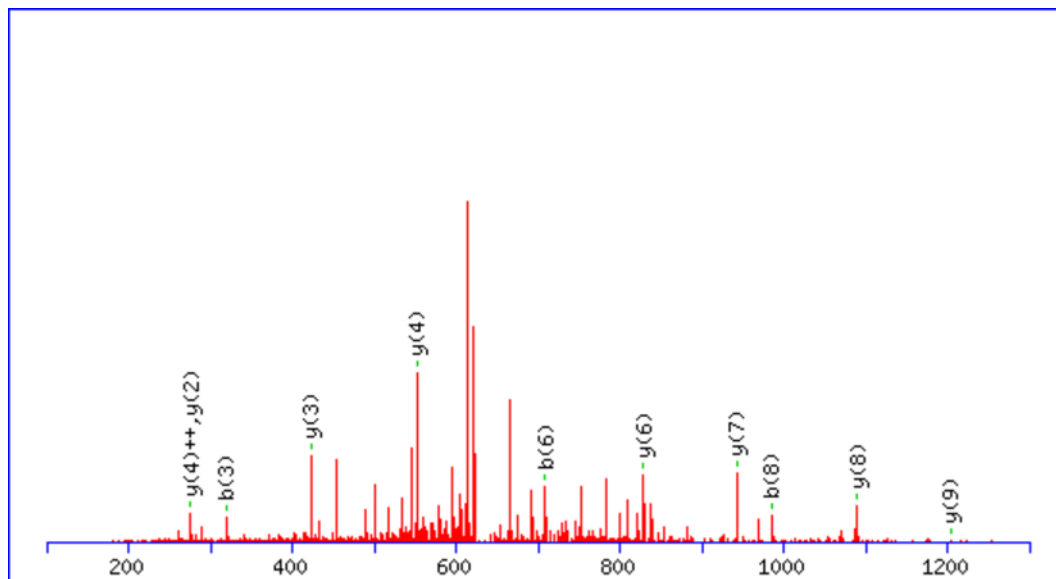

## Peptide View

MS/MS Fragmentation of **VVEQMCIQYER**

Found in **IPI00022284**, Tax\_Id=9606 Gene\_Symbol=PRNP Major prion protein

**Experiment:** 50 - PyB-2 **Fraction:** PyB-2

Match to Query 10360: 1554.717648 from(778.366100,2+)

Title: OECHL100312\_24.12705.12705.2.dta

Data file \\Boromir\masse\Data LTQ-Orbitrap\Chrystelle Lacroix\Etude clinique sJPU\OECHL100312\_24.raw

**Monoisotopic mass of neutral peptide Mr(calc):** 1554.717041 **Fixed modifications:** Carbamidomethyl (C) (apply to specified residues or termini only) **Ions**

**Score:** 91 **Expect:** 7.7e-008 **Matches :** 11/120 fragment ions using 13 most intense peaks ([help](#))

| # | b          | b <sup>++</sup> | b*         | b <sup>*++</sup> | b <sup>0</sup> | b <sup>0++</sup> | Seq. | y                  | y <sup>++</sup> | y*          | y <sup>*++</sup> | y <sup>0</sup> | y <sup>0++</sup> |
|---|------------|-----------------|------------|------------------|----------------|------------------|------|--------------------|-----------------|-------------|------------------|----------------|------------------|
| 1 | 100.075690 | 50.541483       |            |                  |                |                  | V    |                    |                 |             |                  |                |                  |
| 2 | 199.144104 | 100.075690      |            |                  |                |                  | V    | <b>1456.655914</b> | 728.831595      | 1439.629365 | 720.318321       | 1438.645349    | 719.8263         |
| 3 | 328.186697 | 164.596987      |            |                  | 310.176132     | 155.591704       | E    | <b>1357.587500</b> | 679.297388      | 1340.560951 | 670.784114       | 1339.576935    | 670.2921         |
| 4 | 456.245275 | 228.626276      | 439.218726 | 220.113001       | 438.234710     | 219.620993       | Q    | <b>1228.544907</b> | 614.776092      | 1211.518358 | 606.262817       | 1210.534342    | 605.7708         |
| 5 | 587.285760 | 294.146518      | 570.259211 | 285.633244       | 569.275195     | 285.141236       | M    | <b>1100.486329</b> | 550.746803      | 1083.459780 | 542.233528       | 1082.475764    | 541.7415         |

|    |             |            |             |            |             |            |   |            |            |            |            |            |          |
|----|-------------|------------|-------------|------------|-------------|------------|---|------------|------------|------------|------------|------------|----------|
| 6  | 747.316409  | 374.161843 | 730.289860  | 365.648568 | 729.305844  | 365.156560 | C | 969.445844 | 485.226560 | 952.419295 | 476.713286 | 951.435279 | 476.2212 |
| 7  | 860.400473  | 430.703875 | 843.373924  | 422.190600 | 842.389908  | 421.698592 | I | 809.415195 | 405.211236 | 792.388646 | 396.697961 | 791.404630 | 396.2059 |
| 8  | 961.448152  | 481.227714 | 944.421603  | 472.714440 | 943.437587  | 472.222432 | T | 696.331131 | 348.669204 | 679.304582 | 340.155929 | 678.320566 | 339.6639 |
| 9  | 1089.506730 | 545.257003 | 1072.480181 | 536.743729 | 1071.496165 | 536.251721 | Q | 595.283452 | 298.145364 | 578.256903 | 289.632090 | 577.272887 | 289.1400 |
| 10 | 1252.570059 | 626.788668 | 1235.543510 | 618.275393 | 1234.559494 | 617.783385 | Y | 467.224874 | 234.116075 | 450.198325 | 225.602801 | 449.214309 | 225.1107 |
| 11 | 1381.612652 | 691.309964 | 1364.586103 | 682.796690 | 1363.602087 | 682.304682 | E | 304.161545 | 152.584411 | 287.134996 | 144.071136 | 286.150980 | 143.5791 |
| 12 |             |            |             |            |             |            | R | 175.118952 | 88.063114  | 158.092403 | 79.549839  |            |          |

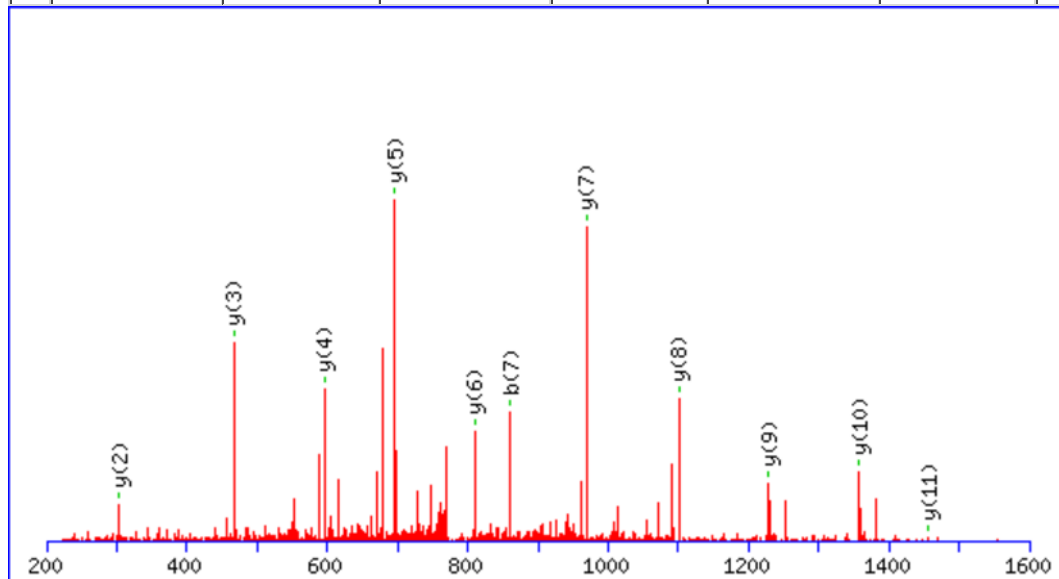

## Peptide View

MS/MS Fragmentation of **YSGSEGSTQTLTKGELK**

Found in **IPI00017526**, Tax\_Id=9606 Gene\_Symbol=S100P Protein S100-P

**Experiment:** 50 - PyB-2 **Fraction:** PyB-2

Match to Query 12335: 1784.880048 from(893.447300,2+)

Title: OECHL100312\_24.8103.8103.2.dta

Data file \\Boromir\masse\Data LTQ-Orbitrap\Chrystelle Lacroix\Etude clinique sJPU\OECHL100312\_24.raw

**Monoisotopic mass of neutral peptide Mr(calc):** 1784.879211 **Fixed modifications:** Carbamidomethyl (C) (apply to specified residues or termini only) **Ions**

Score: 89 Expect: 1.8e-007 Matches : 29/170 fragment ions using 45 most intense peaks ([help](#))

| #  | b                  | b <sup>++</sup> | b*                 | b <sup>*++</sup>  | b <sup>0</sup>     | b <sup>0++</sup>  | Seq. | y                  | y <sup>++</sup>   | y*                 | y <sup>*++</sup> | y <sup>0</sup>    | y <sup>0++</sup> |
|----|--------------------|-----------------|--------------------|-------------------|--------------------|-------------------|------|--------------------|-------------------|--------------------|------------------|-------------------|------------------|
| 1  | 164.070605         | 82.538940       |                    |                   |                    |                   | Y    |                    |                   |                    |                  |                   |                  |
| 2  | 251.102633         | 126.054954      |                    |                   | 233.092068         | 117.049672        | S    | <b>1622.823172</b> | <b>811.915224</b> | 1605.796623        | 803.401950       | 1604.812607       | 802.9099         |
| 3  | 308.124097         | 154.565687      |                    |                   | 290.113532         | 145.560404        | G    | <b>1535.791144</b> | <b>768.399210</b> | 1518.764595        | 759.885936       | 1517.780579       | 759.3939         |
| 4  | 395.156125         | 198.081701      |                    |                   | 377.145560         | 189.076418        | S    | 1478.769680        | 739.888478        | 1461.743131        | 731.375204       | 1460.759115       | 730.8831         |
| 5  | 524.198718         | 262.602997      |                    |                   | <b>506.188153</b>  | 253.597715        | E    | <b>1391.737652</b> | <b>696.372464</b> | 1374.711103        | 687.859190       | 1373.727087       | 687.3671         |
| 6  | 581.220182         | 291.113729      |                    |                   | <b>563.209617</b>  | 282.108447        | G    | <b>1262.695059</b> | <b>631.851167</b> | <b>1245.668510</b> | 623.337893       | 1244.684494       | 622.8458         |
| 7  | 668.252210         | 334.629743      |                    |                   | 650.241645         | <b>325.624461</b> | S    | <b>1205.673595</b> | 603.340436        | 1188.647046        | 594.827161       | 1187.663030       | 594.3351         |
| 8  | 769.299889         | 385.153583      |                    |                   | 751.289324         | 376.148300        | T    | <b>1118.641567</b> | 559.824421        | 1101.615018        | 551.311147       | 1100.631002       | 550.8191         |
| 9  | 897.358467         | 449.182872      | 880.331918         | 440.669597        | 879.347902         | 440.177589        | Q    | <b>1017.593888</b> | 509.300582        | <b>1000.567339</b> | 500.787307       | 999.583323        | 500.2952         |
| 10 | 998.406146         | 499.706711      | 981.379597         | 491.193437        | 980.395581         | 490.701429        | T    | 889.535310         | 445.271293        | 872.508761         | 436.758018       | 871.524745        | 436.2660         |
| 11 | 1111.490210        | 556.248743      | 1094.463661        | 547.735469        | <b>1093.479645</b> | 547.243461        | L    | <b>788.487631</b>  | 394.747453        | 771.461082         | 386.234179       | 770.477066        | 385.7421         |
| 12 | 1212.537889        | 606.772583      | 1195.511340        | 598.259308        | 1194.527324        | 597.767300        | T    | <b>675.403567</b>  | 338.205421        | 658.377018         | 329.692147       | 657.393002        | 329.2001         |
| 13 | <b>1340.632852</b> | 670.820064      | 1323.606303        | 662.306790        | 1322.622287        | 661.814782        | K    | <b>574.355888</b>  | 287.681582        | 557.329339         | 279.168307       | 556.345323        | 278.6762         |
| 14 | <b>1397.654316</b> | 699.330796      | 1380.627767        | 690.817522        | 1379.643751        | 690.325514        | G    | <b>446.260925</b>  | 223.634100        | 429.234376         | 215.120826       | <b>428.250360</b> | 214.6288         |
| 15 | <b>1526.696909</b> | 763.852093      | 1509.670360        | 755.338818        | 1508.686344        | 754.846810        | E    | 389.239461         | 195.123368        | 372.212912         | 186.610094       | 371.228896        | 186.1180         |
| 16 | <b>1639.780973</b> | 820.394124      | <b>1622.754424</b> | <b>811.880850</b> | 1621.770408        | 811.388842        | L    | <b>260.196868</b>  | 130.602072        | 243.170319         | 122.088797       |                   |                  |
| 17 |                    |                 |                    |                   |                    |                   | K    | 147.112804         | 74.060040         | 130.086255         | 65.546765        |                   |                  |

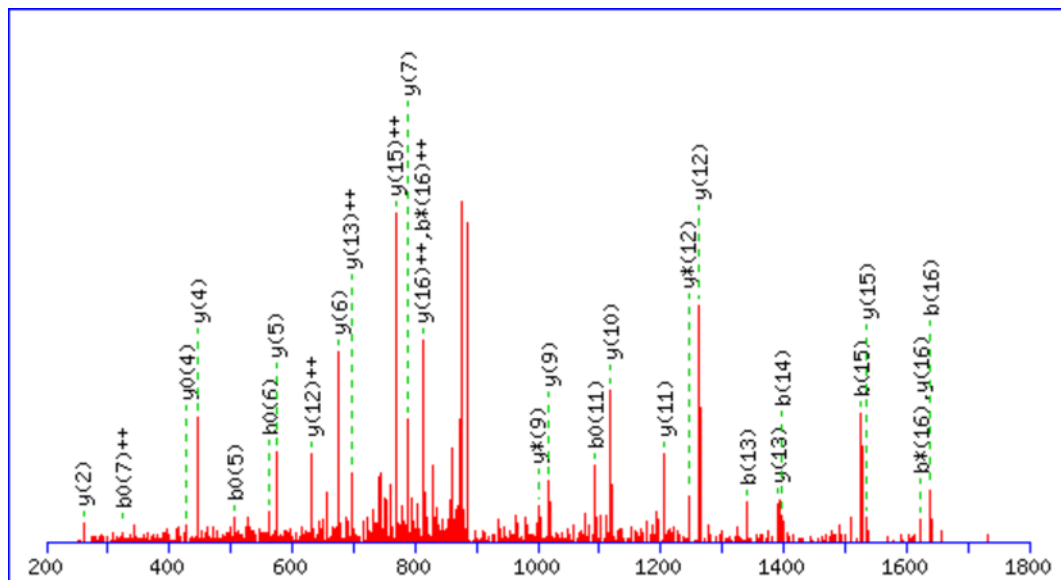

## Peptide View

### MS/MS Fragmentation of **KAGPCEQAGSPCR**

Found in **IPI00028381**, Tax\_Id=9606 Gene\_Symbol=DLK2 Isoform 1 of Protein delta homolog 2

**Experiment:** 50 - PyB-2 **Fraction:** PyB-2

Match to Query 8739: 1416.624048 from(709.319300,2+)

Title: OECHL100312\_24.2306.2306.2.dta

Data file \\Boromir\masse\Data LTQ-Orbitrap\Chrystelle Lacroix\Etude clinique sJPU\OECHL100312\_24.raw

**Monoisotopic mass of neutral peptide Mr(calc):** 1416.623810 **Fixed modifications:** Carbamidomethyl (C) (apply to specified residues or termini only) **Ions**

**Score:** 92 **Expect:** 3.7e-008 **Matches :** 24/128 fragment ions using 36 most intense peaks ([help](#))

| # | b                 | b <sup>++</sup>   | b*         | b <sup>*++</sup> | b <sup>0</sup> | b <sup>0++</sup> | Seq.     | y                  | y <sup>++</sup>   | y*          | y <sup>*++</sup> | y <sup>0</sup> | y <sup>0++</sup> |
|---|-------------------|-------------------|------------|------------------|----------------|------------------|----------|--------------------|-------------------|-------------|------------------|----------------|------------------|
| 1 | 129.102239        | 65.054757         | 112.075690 | 56.541483        |                |                  | <b>K</b> |                    |                   |             |                  |                |                  |
| 2 | 200.139353        | 100.573315        | 183.112804 | 92.060040        |                |                  | <b>A</b> | <b>1289.536133</b> | <b>645.271705</b> | 1272.509584 | 636.758430       | 1271.525568    | 636.2664         |
| 3 | <b>257.160817</b> | 129.084047        | 240.134268 | 120.570772       |                |                  | <b>G</b> | <b>1218.499019</b> | <b>609.753148</b> | 1201.472470 | 601.239873       | 1200.488454    | 600.7478         |
| 4 | 354.213581        | 177.610429        | 337.187032 | 169.097154       |                |                  | <b>P</b> | <b>1161.477555</b> | <b>581.242416</b> | 1144.451006 | 572.729141       | 1143.466990    | 572.2371         |
| 5 | 514.244230        | <b>257.625753</b> | 497.217681 | 249.112479       |                |                  | <b>C</b> | <b>1064.424791</b> | 532.716034        | 1047.398242 | 524.202759       | 1046.414226    | 523.7107         |

|    |             |            |             |            |             |            |   |            |            |            |            |            |          |
|----|-------------|------------|-------------|------------|-------------|------------|---|------------|------------|------------|------------|------------|----------|
| 6  | 643.286823  | 322.147050 | 626.260274  | 313.633775 | 625.276258  | 313.141767 | E | 904.394142 | 452.700709 | 887.367593 | 444.187434 | 886.383577 | 443.6954 |
| 7  | 771.345401  | 386.176339 | 754.318852  | 377.663064 | 753.334836  | 377.171056 | Q | 775.351549 | 388.179413 | 758.325000 | 379.666138 | 757.340984 | 379.1741 |
| 8  | 842.382515  | 421.694896 | 825.355966  | 413.181621 | 824.371950  | 412.689613 | A | 647.292971 | 324.150124 | 630.266422 | 315.636849 | 629.282406 | 315.1448 |
| 9  | 899.403979  | 450.205628 | 882.377430  | 441.692353 | 881.393414  | 441.200345 | G | 576.255857 | 288.631567 | 559.229308 | 280.118292 | 558.245292 | 279.6262 |
| 10 | 986.436007  | 493.721642 | 969.409458  | 485.208367 | 968.425442  | 484.716359 | S | 519.234393 | 260.120835 | 502.207844 | 251.607560 | 501.223828 | 251.1155 |
| 11 | 1083.488771 | 542.248024 | 1066.462222 | 533.734749 | 1065.478206 | 533.242741 | P | 432.202365 | 216.604820 | 415.175816 | 208.091546 |            |          |
| 12 | 1243.519420 | 622.263348 | 1226.492871 | 613.750074 | 1225.508855 | 613.258066 | C | 335.149601 | 168.078438 | 318.123052 | 159.565164 |            |          |
| 13 |             |            |             |            |             |            | R | 175.118952 | 88.063114  | 158.092403 | 79.549839  |            |          |

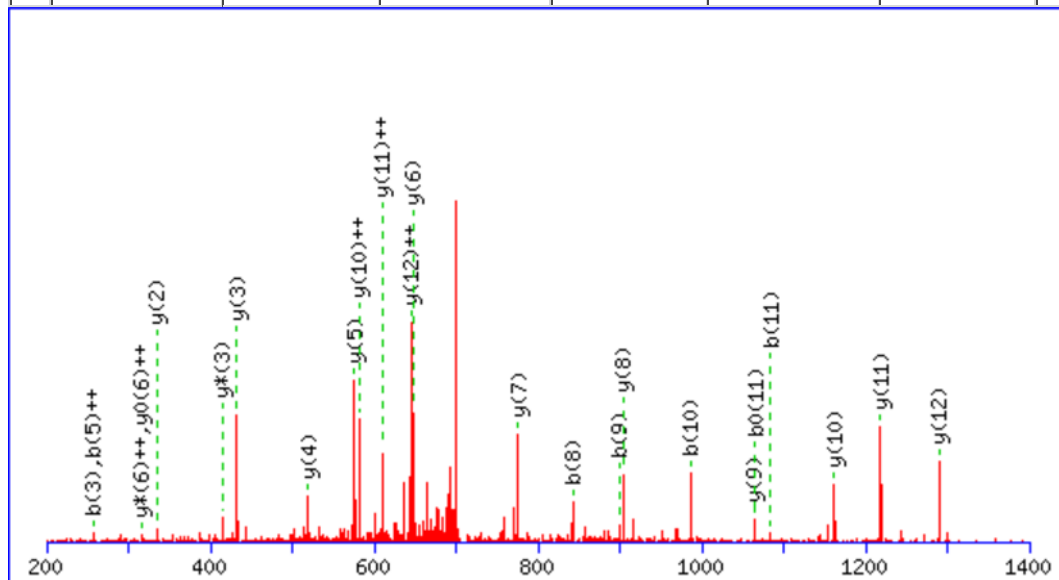

## Peptide View

MS/MS Fragmentation of **SRCPDGSTCCELPSGK**

Found in **IPI00182138**, Tax\_Id=9606 Gene\_Symbol=GRN Isoform 2 of Granulins

Experiment: 50 - PyB-2 Fraction: PyB-2

Match to Query 12452: 1809.745848 from(905.880200,2+)

Title: OECHL100312\_24.5543.5543.2.dta



Data file \\Boromir\masse\Data LTQ-Orbitrap\Chrystelle Lacroix\Etude clinique sJPU\OECHL100312\_24.raw

**Monoisotopic mass of neutral peptide Mr(calc):** 1809.744415**Fixed modifications:** Carbamidomethyl (C) (apply to specified residues or termini only)**Ions****Score:** 66 **Expect:** 7.2e-006**Matches :** 39/174 fragment ions using 79 most intense peaks ([help](#))

| #  | b                  | b <sup>++</sup>   | b*                 | b <sup>*++</sup>  | b <sup>0</sup>    | b <sup>0++</sup>  | Seq. | y                  | y <sup>++</sup>   | y*          | y <sup>*++</sup> | y <sup>0</sup>     | y <sup>0++</sup> |
|----|--------------------|-------------------|--------------------|-------------------|-------------------|-------------------|------|--------------------|-------------------|-------------|------------------|--------------------|------------------|
| 1  | 88.039304          | 44.523290         |                    |                   | 70.028739         | 35.518008         | S    |                    |                   |             |                  |                    |                  |
| 2  | 244.140415         | 122.573845        | 227.113866         | 114.060571        | 226.129850        | 113.568563        | R    | 1723.719653        | 862.363465        | 1706.693104 | 853.850190       | 1705.709088        | 853.3581         |
| 3  | <b>404.171064</b>  | 202.589170        | 387.144515         | 194.075896        | 386.160499        | 193.583888        | C    | <b>1567.618542</b> | 784.312909        | 1550.591993 | 775.799635       | 1549.607977        | 775.3076         |
| 4  | <b>501.223828</b>  | 251.115552        | 484.197279         | 242.602277        | <b>483.213263</b> | 242.110269        | P    | <b>1407.587893</b> | 704.297585        | 1390.561344 | 695.784310       | 1389.577328        | <b>695.2923</b>  |
| 5  | <b>616.250771</b>  | 308.629024        | 599.224222         | 300.115749        | 598.240206        | 299.623741        | D    | <b>1310.535129</b> | <b>655.771203</b> | 1293.508580 | 647.257928       | 1292.524564        | 646.7659         |
| 6  | <b>673.272235</b>  | 337.139756        | <b>656.245686</b>  | 328.626481        | <b>655.261670</b> | 328.134473        | G    | <b>1195.508186</b> | 598.257731        | 1178.481637 | 589.744457       | <b>1177.497621</b> | 589.2524         |
| 7  | <b>760.304263</b>  | 380.655770        | 743.277714         | 372.142495        | 742.293698        | 371.650487        | S    | <b>1138.486722</b> | 569.746999        | 1121.460173 | 561.233725       | 1120.476157        | 560.7417         |
| 8  | <b>861.351942</b>  | 431.179609        | 844.325393         | 422.666335        | 843.341377        | 422.174327        | T    | <b>1051.454694</b> | 526.230985        | 1034.428145 | 517.717711       | 1033.444129        | 517.2257         |
| 9  | <b>1021.382591</b> | 511.194934        | 1004.356042        | <b>502.681659</b> | 1003.372026       | <b>502.189651</b> | C    | 950.407015         | 475.707146        | 933.380466  | 467.193871       | 932.396450         | 466.7018         |
| 10 | <b>1181.413240</b> | 591.210258        | 1164.386691        | 582.696984        | 1163.402675       | 582.204976        | C    | <b>790.376366</b>  | 395.691821        | 773.349817  | 387.178547       | 772.365801         | 386.6865         |
| 11 | <b>1310.455833</b> | <b>655.731555</b> | 1293.429284        | 647.218280        | 1292.445268       | 646.726272        | E    | 630.345717         | 315.676497        | 613.319168  | 307.163222       | 612.335152         | 306.6712         |
| 12 | <b>1423.539897</b> | <b>712.273587</b> | 1406.513348        | <b>703.760312</b> | 1405.529332       | <b>703.268304</b> | L    | <b>501.303124</b>  | 251.155200        | 484.276575  | 242.641925       | <b>483.292559</b>  | 242.1499         |
| 13 | <b>1520.592661</b> | <b>760.799969</b> | <b>1503.566112</b> | 752.286694        | 1502.582096       | 751.794686        | P    | <b>388.219060</b>  | 194.613168        | 371.192511  | 186.099894       | <b>370.208495</b>  | 185.6078         |
| 14 | <b>1607.624689</b> | 804.315983        | 1590.598140        | 795.802708        | 1589.614124       | 795.310700        | S    | <b>291.166296</b>  | 146.086786        | 274.139747  | 137.573512       | 273.155731         | 137.0815         |
| 15 | <b>1664.646153</b> | 832.826715        | 1647.619604        | 824.313440        | 1646.635588       | 823.821432        | G    | 204.134268         | 102.570772        | 187.107719  | 94.057497        |                    |                  |
| 16 |                    |                   |                    |                   |                   |                   | K    | 147.112804         | 74.060040         | 130.086255  | 65.546765        |                    |                  |

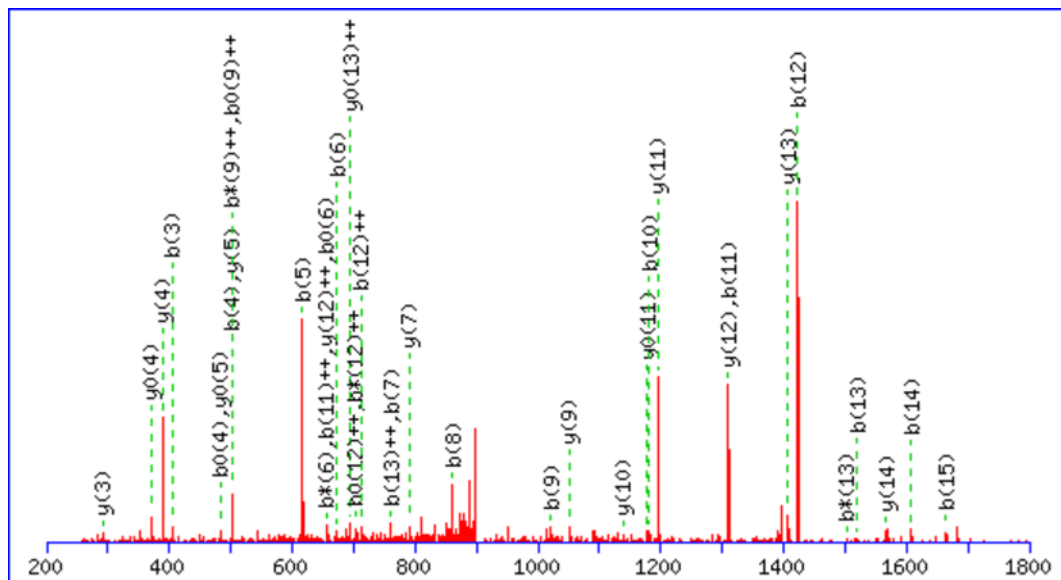

## Peptide View

### MS/MS Fragmentation of **VATQEGKEITCR**

Found in **IPI00031564**, Tax\_Id=9606 Gene\_Symbol=GGCT Isoform 1 of Gamma-glutamylcyclotransferase

**Experiment:** 50 - PyB-2 **Fraction:** PyB-2

Match to Query 8576: 1390.687848 from(696.351200,2+)

Title: OECHL100312\_24.4278.4278.2.dta

Data file \\Boromir\masse\Data LTQ-Orbitrap\Chrystelle Lacroix\Etude clinique sJPU\OECHL100312\_24.raw

**Monoisotopic mass of neutral peptide Mr(calc):** 1390.687454 **Fixed modifications:** Carbamidomethyl (C) (apply to specified residues or termini only) **Ions**

**Score:** 61 **Expect:** 9e-005 **Matches :** 21/118 fragment ions using 36 most intense peaks ([help](#))

| # | b                 | b <sup>++</sup> | b*         | b <sup>*++</sup> | b <sup>0</sup>    | b <sup>0++</sup> | Seq. | y                  | y <sup>++</sup>   | y*                 | y <sup>*++</sup>  | y <sup>0</sup> | y <sup>0++</sup> |
|---|-------------------|-----------------|------------|------------------|-------------------|------------------|------|--------------------|-------------------|--------------------|-------------------|----------------|------------------|
| 1 | 100.075690        | 50.541483       |            |                  |                   |                  | V    |                    |                   |                    |                   |                |                  |
| 2 | 171.112804        | 86.060040       |            |                  |                   |                  | A    | 1292.626328        | 646.816802        | 1275.599779        | 638.303528        | 1274.615763    | 637.8115         |
| 3 | <b>272.160483</b> | 136.583879      |            |                  | 254.149918        | 127.578597       | T    | <b>1221.589214</b> | <b>611.298245</b> | 1204.562665        | 602.784971        | 1203.578649    | 602.2929         |
| 4 | 400.219061        | 200.613169      | 383.192512 | 192.099894       | <b>382.208496</b> | 191.607886       | Q    | <b>1120.541535</b> | <b>560.774406</b> | <b>1103.514986</b> | <b>552.261131</b> | 1102.530970    | <b>551.7691</b>  |
| 5 | 529.261654        | 265.134465      | 512.235105 | 256.621191       | 511.251089        | 256.129183       | E    | <b>992.482957</b>  | 496.745117        | 975.456408         | 488.231842        | 974.472392     | 487.7398         |

|    |             |            |             |            |             |            |   |            |            |            |            |            |          |
|----|-------------|------------|-------------|------------|-------------|------------|---|------------|------------|------------|------------|------------|----------|
| 6  | 586.283118  | 293.645197 | 569.256569  | 285.131923 | 568.272553  | 284.639915 | G | 863.440364 | 432.223820 | 846.413815 | 423.710546 | 845.429799 | 423.2185 |
| 7  | 714.378081  | 357.692679 | 697.351532  | 349.179404 | 696.367516  | 348.687396 | K | 806.418900 | 403.713088 | 789.392351 | 395.199814 | 788.408335 | 394.7078 |
| 8  | 843.420674  | 422.213975 | 826.394125  | 413.700701 | 825.410109  | 413.208693 | E | 678.323937 | 339.665607 | 661.297388 | 331.152332 | 660.313372 | 330.6603 |
| 9  | 956.504738  | 478.756007 | 939.478189  | 470.242733 | 938.494173  | 469.750725 | I | 549.281344 | 275.144310 | 532.254795 | 266.631036 | 531.270779 | 266.1390 |
| 10 | 1057.552417 | 529.279847 | 1040.525868 | 520.766572 | 1039.541852 | 520.274564 | T | 436.197280 | 218.602278 | 419.170731 | 210.089003 | 418.186715 | 209.5969 |
| 11 | 1217.583066 | 609.295171 | 1200.556517 | 600.781897 | 1199.572501 | 600.289889 | C | 335.149601 | 168.078438 | 318.123052 | 159.565164 |            |          |
| 12 |             |            |             |            |             |            | R | 175.118952 | 88.063114  | 158.092403 | 79.549839  |            |          |

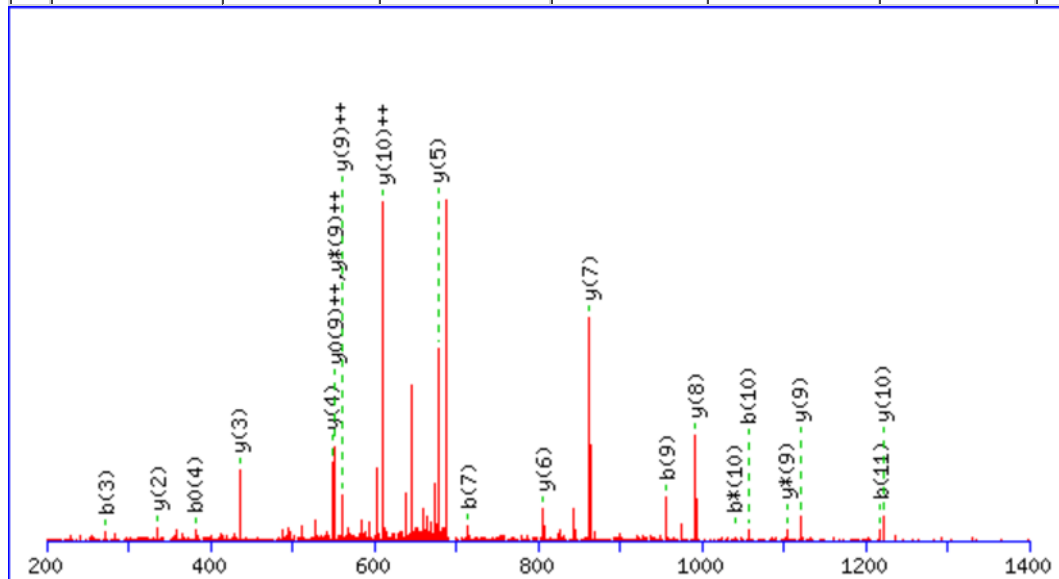

## Peptide View

MS/MS Fragmentation of **MVTGVASALSSR**

Found in **IPI00554676**, Tax\_Id=9606 Gene\_Symbol=HBG2 Hemoglobin subunit gamma-2

**Experiment:** 50 - PyB-2 **Fraction:** PyB-2

Match to Query 5996: 1177.612248 from(589.813400,2+)

Title: OECHL100312\_24.11493.11493.2.dta

Data file \\Boromir\masse\Data LTQ-Orbitrap\Chrystelle Lacroix\Etude clinique sJPU\OECHL100312\_24.raw

**Monoisotopic mass of neutral peptide Mr(calc):** 1177.612503 **Fixed modifications:** Carbamidomethyl (C) (apply to specified residues or termini only) **Ions**

Score: 84 Expect: 3.6e-007 Matches : 32/104 fragment ions using 50 most intense peaks ([help](#))

| #  | b                  | b <sup>++</sup>   | b <sup>0</sup>    | b <sup>0++</sup> | Seq. | y                  | y <sup>++</sup>   | y*                | y* <sup>++</sup>  | y <sup>0</sup> | y <sup>0++</sup>  | #  |
|----|--------------------|-------------------|-------------------|------------------|------|--------------------|-------------------|-------------------|-------------------|----------------|-------------------|----|
| 1  | 132.047761         | 66.527518         |                   |                  | M    |                    |                   |                   |                   |                |                   | 12 |
| 2  | <b>231.116175</b>  | 116.061725        |                   |                  | V    | <b>1047.579299</b> | 524.293288        | 1030.552750       | 515.780013        | 1029.568734    | 515.288005        | 11 |
| 3  | <b>332.163854</b>  | 166.585565        | 314.153289        | 157.580283       | T    | <b>948.510885</b>  | <b>474.759080</b> | 931.484336        | 466.245806        | 930.500320     | 465.753798        | 10 |
| 4  | <b>389.185318</b>  | 195.096297        | 371.174753        | 186.091015       | G    | <b>847.463206</b>  | 424.235241        | <b>830.436657</b> | <b>415.721966</b> | 829.452641     | <b>415.229958</b> | 9  |
| 5  | <b>488.253732</b>  | 244.630504        | 470.243167        | 235.625222       | V    | <b>790.441742</b>  | 395.724509        | 773.415193        | 387.211234        | 772.431177     | 386.719226        | 8  |
| 6  | <b>559.290846</b>  | 280.149061        | 541.280281        | 271.143779       | A    | <b>691.373328</b>  | 346.190302        | 674.346779        | 337.677027        | 673.362763     | 337.185019        | 7  |
| 7  | 646.322874         | 323.665075        | 628.312309        | 314.659793       | S    | <b>620.336214</b>  | 310.671745        | 603.309665        | 302.158470        | 602.325649     | 301.666462        | 6  |
| 8  | <b>717.359988</b>  | 359.183632        | <b>699.349423</b> | 350.178350       | A    | <b>533.304186</b>  | 267.155731        | 516.277637        | 258.642456        | 515.293621     | 258.150448        | 5  |
| 9  | <b>830.444052</b>  | <b>415.725664</b> | 812.433487        | 406.720382       | L    | <b>462.267072</b>  | <b>231.637174</b> | 445.240523        | 223.123899        | 444.256507     | 222.631891        | 4  |
| 10 | <b>917.476080</b>  | 459.241678        | <b>899.465515</b> | 450.236396       | S    | <b>349.183008</b>  | <b>175.095142</b> | <b>332.156459</b> | 166.581867        | 331.172443     | 166.089859        | 3  |
| 11 | <b>1004.508108</b> | 502.757692        | <b>986.497543</b> | 493.752410       | S    | <b>262.150980</b>  | 131.579128        | <b>245.124431</b> | 123.065853        | 244.140415     | 122.573845        | 2  |
| 12 |                    |                   |                   |                  | R    | <b>175.118952</b>  | 88.063114         | 158.092403        | 79.549839         |                |                   | 1  |

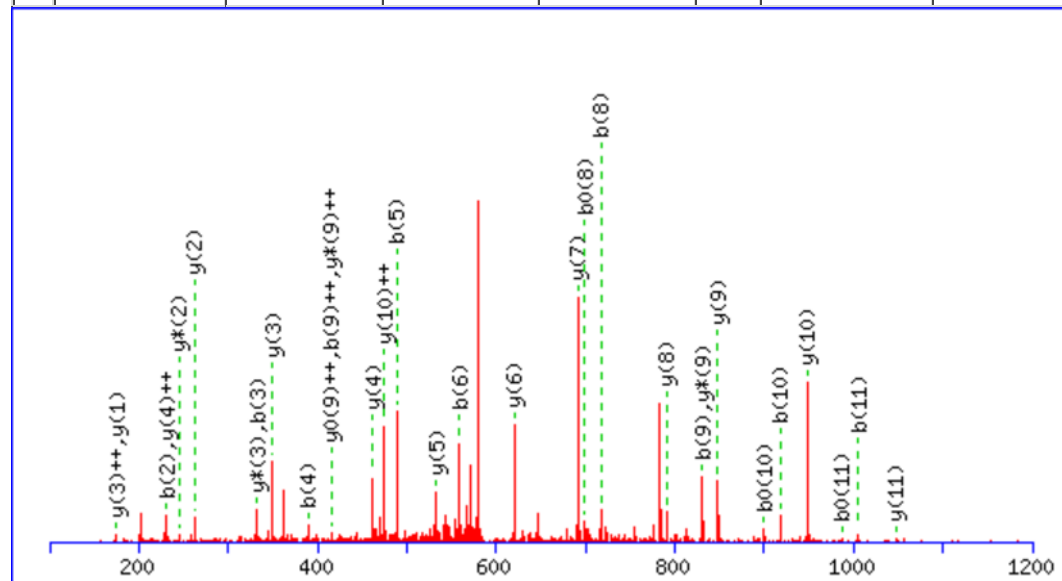

## Peptide View

MS/MS Fragmentation of **DFSLTSSSQTPGATK**

Found in **IPI00291300**, Tax\_Id=9606 Gene\_Symbol=PODXL2 Putative uncharacterized protein PODXL2

**Experiment:** 50 - PyB-2 **Fraction:** PyB-2

Match to Query 9860: 1525.726848 from(763.870700,2+)

Title: OECHL100312\_24.10733.10733.2.dta

Data file \\Boromir\masse\Data LTQ-Orbitrap\Chrystelle Lacroix\Etude clinique sJPU\OECHL100312\_24.raw

**Monoisotopic mass of neutral peptide Mr(calc):** 1525.726028**Fixed modifications:** Carbamidomethyl (C) (apply to specified residues or termini only)**Ions**

**Score:** 76 **Expect:** 2.9e-006**Matches :** 33/150 fragment ions using 52 most intense peaks ([help](#))

| #  | b                  | b <sup>++</sup> | b*                 | b <sup>*++</sup> | b <sup>0</sup>     | b <sup>0++</sup> | Seq.     | y                  | y <sup>++</sup>   | y*          | y <sup>*++</sup>  | y <sup>0</sup>    | y <sup>0++</sup> |
|----|--------------------|-----------------|--------------------|------------------|--------------------|------------------|----------|--------------------|-------------------|-------------|-------------------|-------------------|------------------|
| 1  | 116.034219         | 58.520748       |                    |                  | 98.023654          | 49.515465        | <b>D</b> |                    |                   |             |                   |                   |                  |
| 2  | <b>263.102633</b>  | 132.054954      |                    |                  | 245.092068         | 123.049672       | <b>F</b> | 1411.706351        | 706.356813        | 1394.679802 | 697.843539        | 1393.695786       | 697.3515         |
| 3  | <b>350.134661</b>  | 175.570968      |                    |                  | <b>332.124096</b>  | 166.565686       | <b>S</b> | <b>1264.637937</b> | <b>632.822607</b> | 1247.611388 | <b>624.309332</b> | 1246.627372       | <b>623.8173</b>  |
| 4  | 463.218725         | 232.113001      |                    |                  | <b>445.208160</b>  | 223.107718       | <b>L</b> | <b>1177.605909</b> | 589.306592        | 1160.579360 | 580.793318        | 1159.595344       | 580.3013         |
| 5  | <b>564.266404</b>  | 282.636840      |                    |                  | 546.255839         | 273.631558       | <b>T</b> | <b>1064.521845</b> | 532.764561        | 1047.495296 | 524.251286        | 1046.511280       | 523.7592         |
| 6  | 651.298432         | 326.152854      |                    |                  | <b>633.287867</b>  | 317.147572       | <b>S</b> | <b>963.474166</b>  | 482.240721        | 946.447617  | <b>473.727446</b> | 945.463601        | <b>473.2354</b>  |
| 7  | 738.330460         | 369.668868      |                    |                  | <b>720.319895</b>  | 360.663586       | <b>S</b> | <b>876.442138</b>  | 438.724707        | 859.415589  | 430.211432        | 858.431573        | 429.7194         |
| 8  | 825.362488         | 413.184882      |                    |                  | 807.351923         | 404.179599       | <b>S</b> | 789.410110         | 395.208693        | 772.383561  | 386.695418        | 771.399545        | 386.2034         |
| 9  | <b>953.421066</b>  | 477.214171      | 936.394517         | 468.700897       | 935.410501         | 468.208889       | <b>Q</b> | <b>702.378082</b>  | 351.692679        | 685.351533  | 343.179404        | 684.367517        | 342.6873         |
| 10 | <b>1054.468745</b> | 527.738010      | 1037.442196        | 519.224736       | <b>1036.458180</b> | 518.732728       | <b>T</b> | <b>574.319504</b>  | 287.663390        | 557.292955  | 279.150115        | 556.308939        | 278.6581         |
| 11 | 1151.521509        | 576.264392      | 1134.494960        | 567.751118       | <b>1133.510944</b> | 567.259110       | <b>P</b> | <b>473.271825</b>  | 237.139550        | 456.245276  | 228.626276        | <b>455.261260</b> | 228.1342         |
| 12 | 1208.542973        | 604.775124      | 1191.516424        | 596.261850       | 1190.532408        | 595.769842       | <b>G</b> | <b>376.219061</b>  | 188.613168        | 359.192512  | 180.099894        | 358.208496        | 179.6078         |
| 13 | <b>1279.580087</b> | 640.293681      | 1262.553538        | 631.780407       | <b>1261.569522</b> | 631.288399       | <b>A</b> | <b>319.197597</b>  | 160.102436        | 302.171048  | 151.589162        | 301.187032        | 151.0971         |
| 14 | <b>1380.627766</b> | 690.817521      | <b>1363.601217</b> | 682.304246       | <b>1362.617201</b> | 681.812238       | <b>T</b> | <b>248.160483</b>  | 124.583879        | 231.133934  | 116.070605        | 230.149918        | 115.5785         |
| 15 |                    |                 |                    |                  |                    |                  | <b>K</b> | 147.112804         | 74.060040         | 130.086255  | 65.546765         |                   |                  |

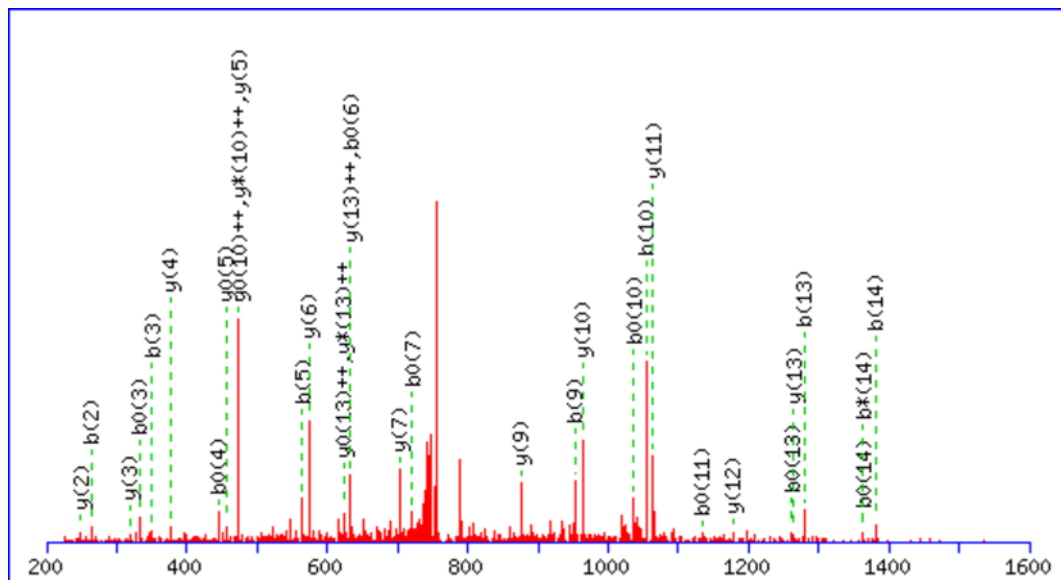

## Peptide View

MS/MS Fragmentation of **KGESGQSWPR**

Found in **IPI00015029**, Tax\_Id=9606 Gene\_Symbol=PTGES3 Prostaglandin E synthase 3

**Experiment:** 50 - PyB-2 **Fraction:** PyB-2

Match to Query 5277: 1130.546648 from(566.280600,2+)

Title: OECHL100312\_24.4760.4760.2.dta

Data file \\Boromir\masse\Data LTQ-Orbitrap\Chrystelle Lacroix\Etude clinique sJPU\OECHL100312\_24.raw

**Monoisotopic mass of neutral peptide Mr(calc):** 1130.546860 **Fixed modifications:** Carbamidomethyl (C) (apply to specified residues or termini only) **Ions**

**Score:** 73 **Expect:** 5.2e-006 **Matches :** 30/98 fragment ions using 46 most intense peaks ([help](#))

| # | b                 | b <sup>++</sup> | b <sup>*</sup>    | b <sup>*++</sup> | b <sup>0</sup>    | b <sup>0++</sup> | Seq.     | y                  | y <sup>++</sup> | y <sup>*</sup>    | y <sup>*++</sup> | y <sup>0</sup>    | y <sup>0++</sup> | #         |
|---|-------------------|-----------------|-------------------|------------------|-------------------|------------------|----------|--------------------|-----------------|-------------------|------------------|-------------------|------------------|-----------|
| 1 | 129.102239        | 65.054757       | 112.075690        | 56.541483        |                   |                  | <b>K</b> |                    |                 |                   |                  |                   |                  | <b>10</b> |
| 2 | <b>186.123703</b> | 93.565489       | <b>169.097154</b> | 85.052215        |                   |                  | <b>G</b> | <b>1003.459184</b> | 502.233230      | <b>986.432635</b> | 493.719956       | <b>985.448619</b> | 493.227948       | <b>9</b>  |
| 3 | <b>315.166296</b> | 158.086786      | 298.139747        | 149.573512       | <b>297.155731</b> | 149.081504       | <b>E</b> | <b>946.437720</b>  | 473.722498      | 929.411171        | 465.209224       | <b>928.427155</b> | 464.717216       | <b>8</b>  |
| 4 | <b>402.198324</b> | 201.602800      | <b>385.171775</b> | 193.089526       | <b>384.187759</b> | 192.597518       | <b>S</b> | <b>817.395127</b>  | 409.201202      | 800.368578        | 400.687927       | <b>799.384562</b> | 400.195919       | <b>7</b>  |
| 5 | <b>459.219788</b> | 230.113532      | 442.193239        | 221.600258       | 441.209223        | 221.108250       | <b>G</b> | <b>730.363099</b>  | 365.685188      | 713.336550        | 357.171913       | 712.352534        | 356.679905       | <b>6</b>  |

|    |                   |            |            |            |                   |            |   |                   |                   |                   |            |                   |            |   |
|----|-------------------|------------|------------|------------|-------------------|------------|---|-------------------|-------------------|-------------------|------------|-------------------|------------|---|
| 6  | <b>587.278366</b> | 294.142821 | 570.251817 | 285.629547 | 569.267801        | 285.137539 | Q | <b>673.341635</b> | 337.174456        | <b>656.315086</b> | 328.661181 | <b>655.331070</b> | 328.169173 | 5 |
| 7  | <b>674.310394</b> | 337.658835 | 657.283845 | 329.145560 | <b>656.299829</b> | 328.653552 | S | <b>545.283057</b> | <b>273.145167</b> | 528.256508        | 264.631892 | 527.272492        | 264.139884 | 4 |
| 8  | <b>860.389707</b> | 430.698492 | 843.363158 | 422.185217 | 842.379142        | 421.693209 | W | <b>458.251029</b> | 229.629153        | 441.224480        | 221.115878 |                   |            | 3 |
| 9  | <b>957.442471</b> | 479.224874 | 940.415922 | 470.711599 | 939.431906        | 470.219591 | P | <b>272.171716</b> | 136.589496        | <b>255.145167</b> | 128.076221 |                   |            | 2 |
| 10 |                   |            |            |            |                   |            | R | <b>175.118952</b> | 88.063114         | 158.092403        | 79.549839  |                   |            | 1 |

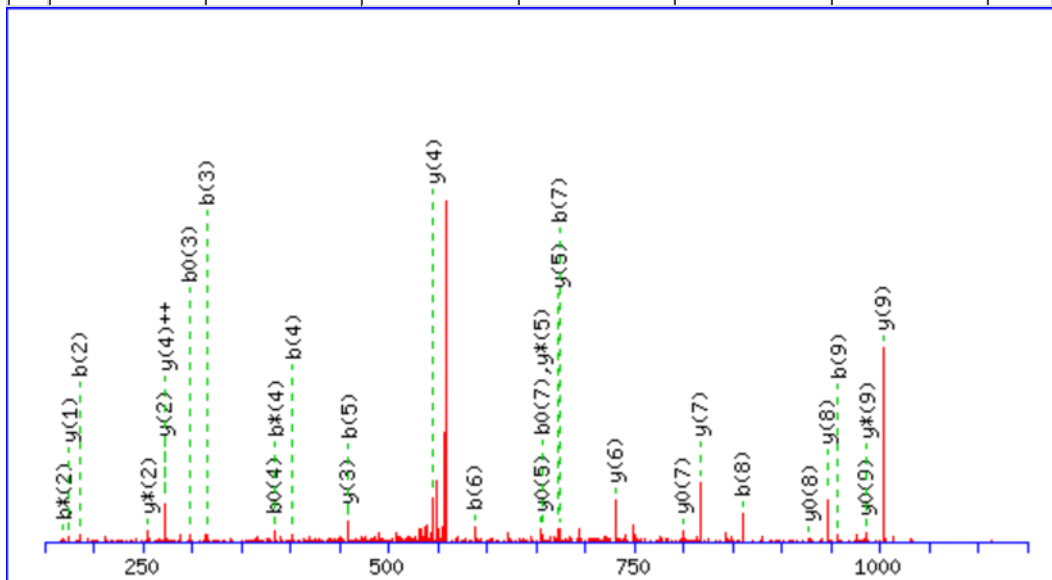

## Peptide View

MS/MS Fragmentation of **IESVLSSGKR**

Found in **IPI00018236**, Tax\_Id=9606 Gene\_Symbol=GM2A Ganglioside GM2 activator

**Experiment:** 50 - PyB-2 **Fraction:** PyB-2

Match to Query 5751: 1161.633848 from(581.824200,2+)

Title: OECHL100312\_24.5842.5842.2.dta

Data file \\Boromir\masse\Data LTQ-Orbitrap\Chrystelle Lacroix\Etude clinique sJPU\OECHL100312\_24.raw

**Monoisotopic mass of neutral peptide Mr(calc):** 1161.635330 **Fixed modifications:** Carbamidomethyl (C) (apply to specified residues or termini only) **Ions**

**Score:** 64 **Expect:** 3.1e-005 **Matches :** 21/94 fragment ions using 30 most intense peaks ([help](#))

| # | b | b <sup>++</sup> | b <sup>*</sup> | b <sup>*++</sup> | b <sup>0</sup> | b <sup>0++</sup> | Seq. | y | y <sup>++</sup> | y <sup>*</sup> | y <sup>*++</sup> | y <sup>0</sup> | y <sup>0++</sup> |
|---|---|-----------------|----------------|------------------|----------------|------------------|------|---|-----------------|----------------|------------------|----------------|------------------|
|---|---|-----------------|----------------|------------------|----------------|------------------|------|---|-----------------|----------------|------------------|----------------|------------------|

|    |                   |                   |            |            |                   |            |          |                    |                   |             |                   |                   |                   |  |
|----|-------------------|-------------------|------------|------------|-------------------|------------|----------|--------------------|-------------------|-------------|-------------------|-------------------|-------------------|--|
| 1  | 114.091340        | 57.549308         |            |            |                   |            |          | <b>I</b>           |                   |             |                   |                   |                   |  |
| 2  | <b>243.133933</b> | 122.070605        |            |            | 225.123368        | 113.065322 | <b>E</b> | <b>1049.558562</b> | <b>525.282919</b> | 1032.532013 | 516.769645        | 1031.547997       | 516.277637        |  |
| 3  | 330.165961        | 165.586618        |            |            | <b>312.155396</b> | 156.581336 | <b>S</b> | <b>920.515969</b>  | <b>460.761623</b> | 903.489420  | 452.248348        | <b>902.505404</b> | 451.756340        |  |
| 4  | <b>429.234375</b> | <b>215.120826</b> |            |            | <b>411.223810</b> | 206.115543 | <b>V</b> | <b>833.483941</b>  | 417.245609        | 816.457392  | 408.732334        | 815.473376        | 408.240326        |  |
| 5  | 542.318439        | 271.662858        |            |            | 524.307874        | 262.657575 | <b>L</b> | <b>734.415527</b>  | <b>367.711402</b> | 717.388978  | 359.198127        | 716.404962        | 358.706119        |  |
| 6  | 629.350467        | 315.178872        |            |            | 611.339902        | 306.173589 | <b>S</b> | <b>621.331463</b>  | 311.169370        | 604.304914  | 302.656095        | 603.320898        | 302.164087        |  |
| 7  | 716.382495        | 358.694886        |            |            | 698.371930        | 349.689603 | <b>S</b> | <b>534.299435</b>  | 267.653356        | 517.272886  | 259.140081        | 516.288870        | 258.648073        |  |
| 8  | 803.414523        | 402.210899        |            |            | 785.403958        | 393.205617 | <b>S</b> | 447.267407         | 224.137342        | 430.240858  | <b>215.624067</b> | <b>429.256842</b> | <b>215.132059</b> |  |
| 9  | 860.435987        | 430.721632        |            |            | 842.425422        | 421.716349 | <b>G</b> | <b>360.235379</b>  | 180.621328        | 343.208830  | 172.108053        |                   |                   |  |
| 10 | <b>988.530950</b> | 494.769113        | 971.504401 | 486.255838 | 970.520385        | 485.763830 | <b>K</b> | 303.213915         | 152.110596        | 286.187366  | 143.597321        |                   |                   |  |
| 11 |                   |                   |            |            |                   |            | <b>R</b> | <b>175.118952</b>  | 88.063114         | 158.092403  | 79.549840         |                   |                   |  |

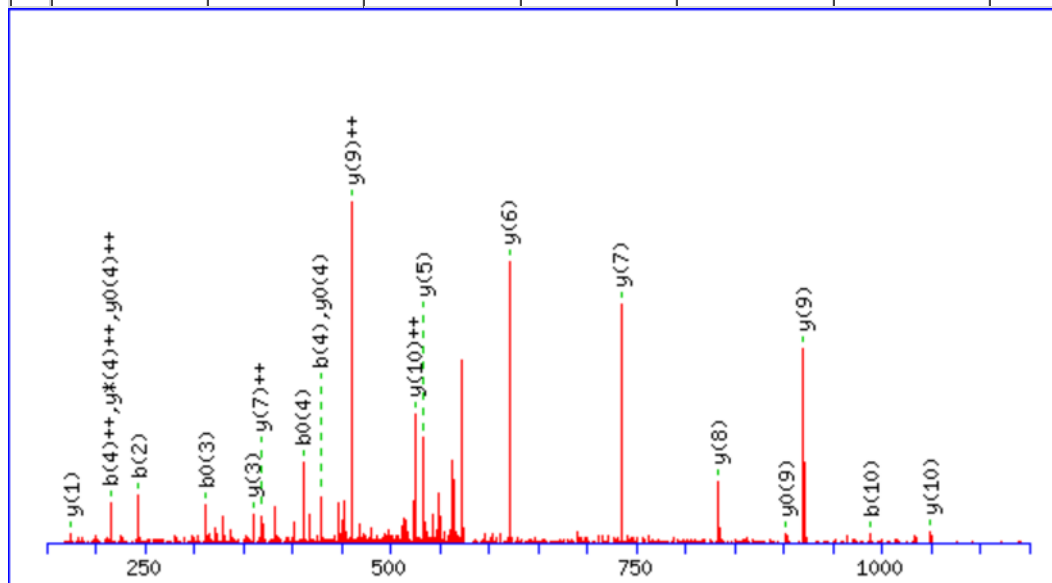

## Peptide View

MS/MS Fragmentation of **SYELTQPPSVSVSPGQ TAR**

Found in **IPI00382440**, Tax\_Id=9606 Gene\_Symbol=- Ig lambda chain V-IV region Hil



**Experiment: 50 - PyB-2 Fraction: PyB-2**

Match to Query 13386: 2002.995448 from(1002.505000,2+)

Title: OECHL100312\_24.12788.12788.2.dta

Data file \\Boromir\masse\Data LTQ-Orbitrap\Chrystelle Lacroix\Etude clinique sJPU\OECHL100312\_24.raw

**Monoisotopic mass of neutral peptide Mr(calc):** 2002.995987**Fixed modifications:** Carbamidomethyl (C) (apply to specified residues or termini only)**Ions****Score:** 64 **Expect:** 7e-005**Matches :** 28/202 fragment ions using 33 most intense peaks ([help](#))

| #  | <b>b</b>           | <b>b<sup>++</sup></b> | <b>b<sup>*</sup></b> | <b>b<sup>*++</sup></b> | <b>b<sup>0</sup></b> | <b>b<sup>0++</sup></b> | Seq. | <b>y</b>           | <b>y<sup>++</sup></b> | <b>y<sup>*</sup></b> | <b>y<sup>*++</sup></b> | <b>y<sup>0</sup></b> | <b>y<sup>0++</sup></b> |
|----|--------------------|-----------------------|----------------------|------------------------|----------------------|------------------------|------|--------------------|-----------------------|----------------------|------------------------|----------------------|------------------------|
| 1  | 88.039304          | 44.523290             |                      |                        | 70.028739            | 35.518008              | S    |                    |                       |                      |                        |                      |                        |
| 2  | 251.102633         | 126.054954            |                      |                        | 233.092068           | 117.049672             | Y    | 1916.971234        | 958.989255            | 1899.944685          | 950.475981             | 1898.960669          | 949.9839               |
| 3  | <b>380.145226</b>  | 190.576251            |                      |                        | <b>362.134661</b>    | 181.570969             | E    | 1753.907905        | 877.457591            | 1736.881356          | 868.944316             | 1735.897340          | 868.4523               |
| 4  | <b>493.229290</b>  | 247.118283            |                      |                        | <b>475.218725</b>    | 238.113001             | L    | 1624.865312        | 812.936294            | 1607.838763          | 804.423020             | 1606.854747          | 803.9310               |
| 5  | 594.276969         | 297.642123            |                      |                        | <b>576.266404</b>    | 288.636840             | T    | <b>1511.781248</b> | 756.394262            | 1494.754699          | 747.880988             | 1493.770683          | 747.3889               |
| 6  | 722.335547         | 361.671412            | 705.308998           | 353.158137             | <b>704.324982</b>    | 352.666129             | Q    | <b>1410.733569</b> | 705.870423            | 1393.707020          | 697.357148             | 1392.723004          | 696.8651               |
| 7  | 819.388311         | 410.197794            | 802.361762           | 401.684519             | 801.377746           | 401.192511             | P    | <b>1282.674991</b> | <b>641.841134</b>     | 1265.648442          | 633.327859             | 1264.664426          | 632.8358               |
| 8  | 916.441075         | 458.724176            | 899.414526           | 450.210901             | 898.430510           | 449.718893             | P    | <b>1185.622227</b> | 593.314752            | 1168.595678          | 584.801477             | 1167.611662          | 584.3094               |
| 9  | 1003.473103        | 502.240190            | 986.446554           | 493.726915             | <b>985.462538</b>    | <b>493.234907</b>      | S    | 1088.569463        | 544.788370            | 1071.542914          | 536.275095             | 1070.558898          | 535.7830               |
| 10 | <b>1102.541517</b> | 551.774397            | <b>1085.514968</b>   | 543.261122             | <b>1084.530952</b>   | 542.769114             | V    | 1001.537435        | 501.272356            | 984.510886           | <b>492.759081</b>      | 983.526870           | 492.2670               |
| 11 | 1189.573545        | 595.290411            | 1172.546996          | 586.777136             | 1171.562980          | 586.285128             | S    | <b>902.469021</b>  | 451.738149            | 885.442472           | 443.224874             | 884.458456           | 442.7328               |
| 12 | 1288.641959        | 644.824618            | 1271.615410          | 636.311343             | 1270.631394          | 635.819335             | V    | <b>815.436993</b>  | 408.222135            | 798.410444           | 399.708860             | 797.426428           | 399.2168               |
| 13 | <b>1375.673987</b> | 688.340632            | 1358.647438          | 679.827357             | 1357.663422          | 679.335349             | S    | <b>716.368579</b>  | 358.687928            | 699.342030           | 350.174653             | 698.358014           | 349.6826               |
| 14 | 1472.726751        | 736.867014            | 1455.700202          | 728.353739             | 1454.716186          | 727.861731             | P    | <b>629.336551</b>  | 315.171914            | 612.310002           | 306.658639             | 611.325986           | 306.1666               |
| 15 | 1529.748215        | 765.377746            | <b>1512.721666</b>   | 756.864471             | <b>1511.737650</b>   | 756.372463             | G    | 532.283787         | 266.645532            | 515.257238           | 258.132257             | 514.273222           | 257.6402               |
| 16 | 1657.806793        | 829.407035            | 1640.780244          | 820.893760             | 1639.796228          | 820.401752             | Q    | <b>475.262323</b>  | 238.134800            | 458.235774           | 229.621525             | 457.251758           | 229.1295               |
| 17 | <b>1758.854472</b> | 879.930874            | 1741.827923          | 871.417600             | 1740.843907          | 870.925592             | T    | 347.203745         | 174.105510            | 330.177196           | 165.592236             | 329.193180           | 165.1002               |
| 18 | <b>1829.891586</b> | 915.449431            | <b>1812.865037</b>   | 906.936157             | 1811.881021          | 906.444149             | A    | 246.156066         | 123.581671            | 229.129517           | 115.068396             |                      |                        |
| 19 |                    |                       |                      |                        |                      |                        | R    | 175.118952         | 88.063114             | 158.092403           | 79.549839              |                      |                        |

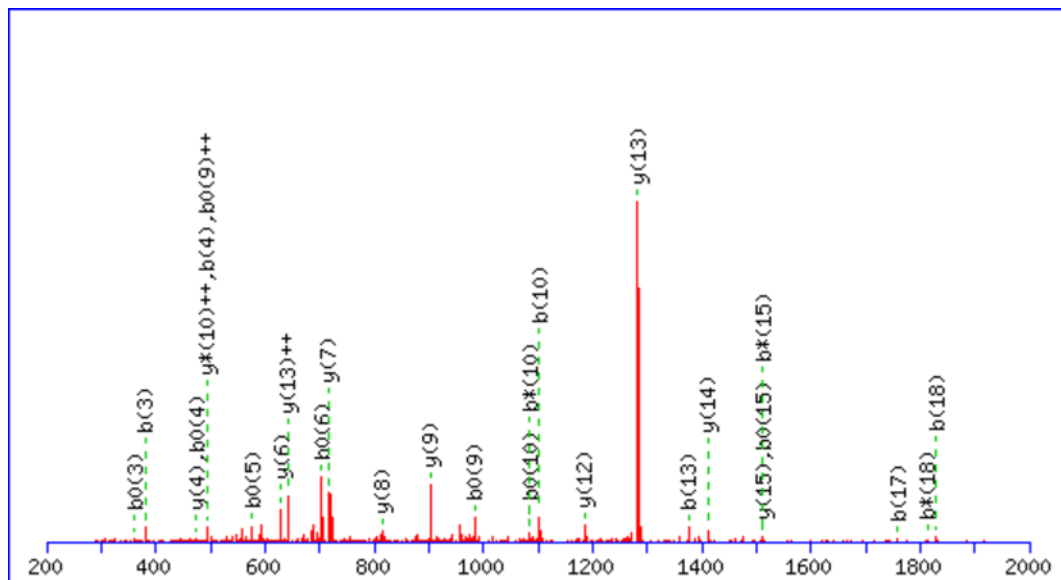

## Peptide View

### MS/MS Fragmentation of **STVEELHEPIPSLFR**

Found in **IPI00410487**, Tax\_Id=9606 Gene\_Symbol=TWSG1 Isoform 1 of Twisted gastrulation protein homolog 1

**Experiment:** 50 - PyB-2 **Fraction:** PyB-2

Match to Query 12145: 1752.903448 from(877.459000,2+)

Title: OECHL100312\_24.16366.16366.2.dta

Data file \\Boromir\masse\Data LTQ-Orbitrap\Chrystelle Lacroix\Etude clinique sJPU\OECHL100312\_24.raw

**Monoisotopic mass of neutral peptide Mr(calc):** 1752.904633 **Fixed modifications:** Carbamidomethyl (C) (apply to specified residues or termini only) **Ions**

**Score:** 58 **Expect:** 0.0002 **Matches :** 14/134 fragment ions using 15 most intense peaks ([help](#))

| # | b          | b <sup>++</sup> | b <sup>0</sup> | b <sup>0++</sup> | Seq. | y           | y <sup>++</sup> | y <sup>*</sup> | y <sup>*++</sup> | y <sup>0</sup> | y <sup>0++</sup> | #  |
|---|------------|-----------------|----------------|------------------|------|-------------|-----------------|----------------|------------------|----------------|------------------|----|
| 1 | 88.039304  | 44.523290       | 70.028739      | 35.518008        | S    |             |                 |                |                  |                |                  | 15 |
| 2 | 189.086983 | 95.047129       | 171.076418     | 86.041847        | T    | 1666.879898 | 833.943587      | 1649.853349    | 825.430313       | 1648.869333    | 824.938304       | 14 |
| 3 | 288.155397 | 144.581336      | 270.144832     | 135.576054       | V    | 1565.832219 | 783.419748      | 1548.805670    | 774.906473       | 1547.821654    | 774.414465       | 13 |
| 4 | 417.197990 | 209.102633      | 399.187425     | 200.097351       | E    | 1466.763805 | 733.885541      | 1449.737256    | 725.372266       | 1448.753240    | 724.880258       | 12 |
| 5 | 546.240583 | 273.623930      | 528.230018     | 264.618647       | E    | 1337.721212 | 669.364244      | 1320.694663    | 660.850970       | 1319.710647    | 660.358961       | 11 |

|    |             |            |             |            |   |             |            |             |            |             |            |    |
|----|-------------|------------|-------------|------------|---|-------------|------------|-------------|------------|-------------|------------|----|
| 6  | 659.324647  | 330.165962 | 641.314082  | 321.160679 | L | 1208.678619 | 604.842948 | 1191.652070 | 596.329673 | 1190.668054 | 595.837665 | 10 |
| 7  | 796.383559  | 398.695418 | 778.372994  | 389.690135 | H | 1095.594555 | 548.300915 | 1078.568006 | 539.787641 | 1077.583990 | 539.295633 | 9  |
| 8  | 925.426152  | 463.216714 | 907.415587  | 454.211432 | E | 958.535643  | 479.771460 | 941.509094  | 471.258185 | 940.525078  | 470.766177 | 8  |
| 9  | 1022.478916 | 511.743096 | 1004.468351 | 502.737814 | P | 829.493050  | 415.250163 | 812.466501  | 406.736889 | 811.482485  | 406.244881 | 7  |
| 10 | 1135.562980 | 568.285128 | 1117.552415 | 559.279845 | I | 732.440286  | 366.723781 | 715.413737  | 358.210507 | 714.429721  | 357.718499 | 6  |
| 11 | 1232.615744 | 616.811510 | 1214.605179 | 607.806227 | P | 619.356222  | 310.181749 | 602.329673  | 301.668475 | 601.345657  | 301.176467 | 5  |
| 12 | 1319.647772 | 660.327524 | 1301.637207 | 651.322242 | S | 522.303458  | 261.655367 | 505.276909  | 253.142093 | 504.292893  | 252.650085 | 4  |
| 13 | 1432.731836 | 716.869556 | 1414.721271 | 707.864273 | L | 435.271430  | 218.139353 | 418.244881  | 209.626078 |             |            | 3  |
| 14 | 1579.800250 | 790.403763 | 1561.789685 | 781.398481 | F | 322.187366  | 161.597321 | 305.160817  | 153.084047 |             |            | 2  |
| 15 |             |            |             |            | R | 175.118952  | 88.063114  | 158.092403  | 79.549839  |             |            | 1  |

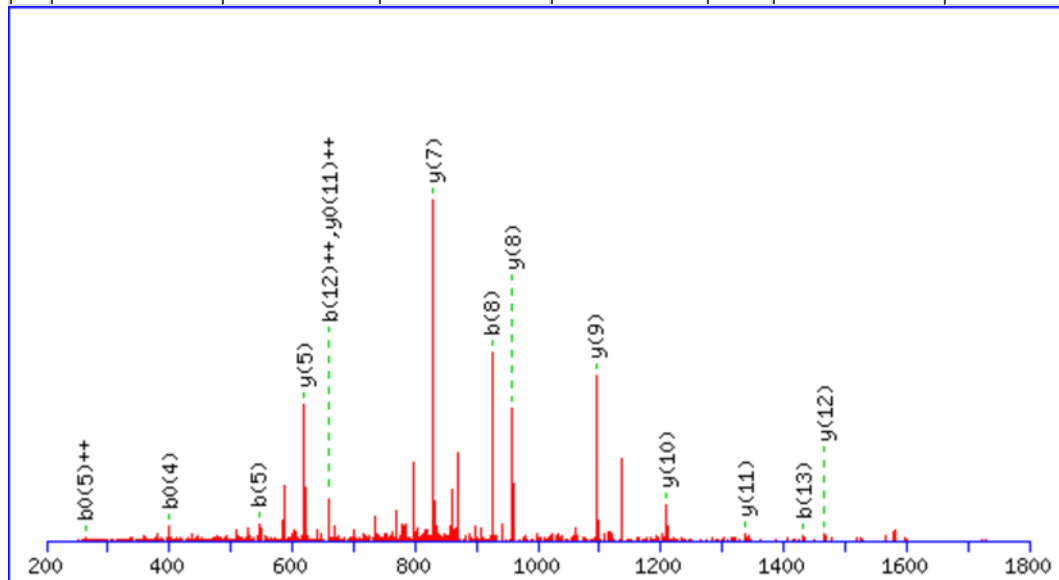

## Peptide View

MS/MS Fragmentation of **QLGPQPQDIYYEDGVVPTDRR**

Found in **IPI00015199**, Tax\_Id=9606 Gene\_Symbol=CD7 T-cell antigen CD7

Experiment: 50 - PyB-2 Fraction: PyB-2

Match to Query 15135: 2659.328472 from(887.450100,3+)

Title: OECHL100312\_24.16256.16256.3.dta

Data file \\Boromir\masse\Data LTQ-Orbitrap\Chrystelle Lacroix\Etude clinique sJPU\OECHL100312\_24.raw

**Monoisotopic mass of neutral peptide Mr(calc):** 2659.324203**Fixed modifications:** Carbamidomethyl (C) (apply to specified residues or termini only)**Ions****Score:** 57 **Expect:** 0.00036**Matches :** 26/246 fragment ions using 52 most intense peaks ([help](#))

| #  | b           | b <sup>++</sup> | b*          | b <sup>*++</sup> | b <sup>0</sup> | b <sup>0++</sup> | Seq. | y           | y <sup>++</sup> | y*          | y <sup>*++</sup> | y <sup>0</sup> |     |
|----|-------------|-----------------|-------------|------------------|----------------|------------------|------|-------------|-----------------|-------------|------------------|----------------|-----|
| 1  | 129.065854  | 65.036565       | 112.039305  | 56.523291        |                |                  | Q    |             |                 |             |                  |                |     |
| 2  | 242.149918  | 121.578597      | 225.123369  | 113.065323       |                |                  | L    | 2532.272897 | 1266.640086     | 2515.246348 | 1258.126812      | 2514.262332    | 12: |
| 3  | 299.171382  | 150.089329      | 282.144833  | 141.576055       |                |                  | G    | 2419.188833 | 1210.098054     | 2402.162284 | 1201.584780      | 2401.178268    | 12: |
| 4  | 396.224146  | 198.615711      | 379.197597  | 190.102436       |                |                  | P    | 2362.167369 | 1181.587322     | 2345.140820 | 1173.074048      | 2344.156804    | 11: |
| 5  | 524.282724  | 262.645000      | 507.256175  | 254.131726       |                |                  | Q    | 2265.114605 | 1133.060940     | 2248.088056 | 1124.547666      | 2247.104040    | 11: |
| 6  | 621.335488  | 311.171382      | 604.308939  | 302.658108       |                |                  | P    | 2137.056027 | 1069.031651     | 2120.029478 | 1060.518377      | 2119.045462    | 10: |
| 7  | 749.394066  | 375.200671      | 732.367517  | 366.687397       |                |                  | Q    | 2040.003263 | 1020.505269     | 2022.976714 | 1011.991995      | 2021.992698    | 10: |
| 8  | 864.421009  | 432.714143      | 847.394460  | 424.200868       | 846.410444     | 423.708860       | D    | 1911.944685 | 956.475980      | 1894.918136 | 947.962706       | 1893.934120    | 9:  |
| 9  | 977.505073  | 489.256175      | 960.478524  | 480.742900       | 959.494508     | 480.250892       | I    | 1796.917742 | 898.962509      | 1779.891193 | 890.449234       | 1778.907177    | 8:  |
| 10 | 1090.589137 | 545.798206      | 1073.562588 | 537.284932       | 1072.578572    | 536.792924       | I    | 1683.833678 | 842.420477      | 1666.807129 | 833.907202       | 1665.823113    | 8:  |
| 11 | 1253.652466 | 627.329871      | 1236.625917 | 618.816597       | 1235.641901    | 618.324589       | Y    | 1570.749614 | 785.878445      | 1553.723065 | 777.365170       | 1552.739049    | 7:  |
| 12 | 1416.715795 | 708.861536      | 1399.689246 | 700.348261       | 1398.705230    | 699.856253       | Y    | 1407.686285 | 704.346780      | 1390.659736 | 695.833506       | 1389.675720    | 6:  |
| 13 | 1545.758388 | 773.382832      | 1528.731839 | 764.869558       | 1527.747823    | 764.377549       | E    | 1244.622956 | 622.815116      | 1227.596407 | 614.301841       | 1226.612391    | 6:  |
| 14 | 1660.785331 | 830.896304      | 1643.758782 | 822.383029       | 1642.774766    | 821.891021       | D    | 1115.580363 | 558.293819      | 1098.553814 | 549.780545       | 1097.569798    | 5:  |
| 15 | 1717.806795 | 859.407036      | 1700.780246 | 850.893761       | 1699.796230    | 850.401753       | G    | 1000.553420 | 500.780348      | 983.526871  | 492.267073       | 982.542855     | 4:  |
| 16 | 1816.875209 | 908.941243      | 1799.848660 | 900.427968       | 1798.864644    | 899.935960       | V    | 943.531956  | 472.269616      | 926.505407  | 463.756341       | 925.521391     | 4:  |
| 17 | 1915.943623 | 958.475450      | 1898.917074 | 949.962175       | 1897.933058    | 949.470167       | V    | 844.463542  | 422.735409      | 827.436993  | 414.222134       | 826.452977     | 4:  |
| 18 | 2012.996387 | 1007.001832     | 1995.969838 | 998.488557       | 1994.985822    | 997.996549       | P    | 745.395128  | 373.201202      | 728.368579  | 364.687927       | 727.384563     | 3:  |
| 19 | 2114.044066 | 1057.525671     | 2097.017517 | 1049.012396      | 2096.033501    | 1048.520388      | T    | 648.342364  | 324.674820      | 631.315815  | 316.161545       | 630.331799     | 3:  |
| 20 | 2215.091745 | 1108.049510     | 2198.065196 | 1099.536236      | 2197.081180    | 1099.044228      | T    | 547.294685  | 274.150980      | 530.268136  | 265.637706       | 529.284120     | 2:  |
| 21 | 2330.118688 | 1165.562982     | 2313.092139 | 1157.049707      | 2312.108123    | 1156.557699      | D    | 446.247006  | 223.627141      | 429.220457  | 215.113866       | 428.236441     | 2:  |
| 22 | 2486.219799 | 1243.613537     | 2469.193250 | 1235.100263      | 2468.209234    | 1234.608255      | R    | 331.220063  | 166.113669      | 314.193514  | 157.600395       |                |     |
| 23 |             |                 |             |                  |                |                  | R    | 175.118952  | 88.063114       | 158.092403  | 79.549839        |                |     |

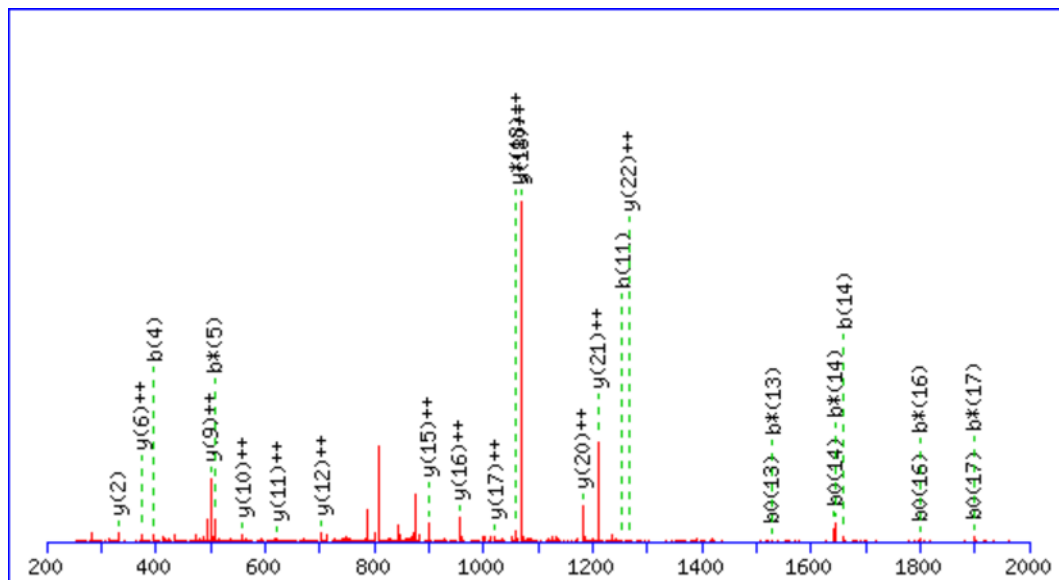

## Peptide View

MS/MS Fragmentation of **AGSFK VATQER**

Found in **IPI00643388**, Tax\_Id=9606 Gene\_Symbol=RGL4 RGL4 protein

**Experiment:** 50 - PyB-2 **Fraction:** PyB-2

Match to Query 6171: 1192.620648 from(597.317600,2+)

Title: OECHL100312\_24.2452.2452.2.dta

Data file \\Boromir\masse\Data LTQ-Orbitrap\Chrystelle Lacroix\Etude clinique sJPU\OECHL100312\_24.raw

**Monoisotopic mass of neutral peptide Mr(calc):** 1192.620026 **Fixed modifications:** Carbamidomethyl (C) (apply to specified residues or termini only) **Ions**

**Score:** 50 **Expect:** 0.00078 **Matches :** 20/106 fragment ions using 30 most intense peaks ([help](#))

| # | b                 | b <sup>++</sup> | b*         | b <sup>*++</sup> | b <sup>0</sup> | b <sup>0++</sup> | Seq. | y                  | y <sup>++</sup>   | y*                | y <sup>*++</sup> | y <sup>0</sup>    | y <sup>0++</sup> |
|---|-------------------|-----------------|------------|------------------|----------------|------------------|------|--------------------|-------------------|-------------------|------------------|-------------------|------------------|
| 1 | 72.044390         | 36.525833       |            |                  |                |                  | A    |                    |                   |                   |                  |                   |                  |
| 2 | 129.065854        | 65.036565       |            |                  |                |                  | G    | <b>1122.590199</b> | 561.798738        | 1105.563650       | 553.285463       | 1104.579634       | 552.7934         |
| 3 | <b>216.097882</b> | 108.552579      |            |                  | 198.087317     | 99.547296        | S    | <b>1065.568735</b> | <b>533.288006</b> | 1048.542186       | 524.774731       | 1047.558170       | 524.2827         |
| 4 | <b>363.166296</b> | 182.086786      |            |                  | 345.155731     | 173.081504       | F    | <b>978.536707</b>  | <b>489.771992</b> | <b>961.510158</b> | 481.258717       | <b>960.526142</b> | 480.7667         |
| 5 | 491.261259        | 246.134267      | 474.234710 | 237.620993       | 473.250694     | 237.128985       | K    | <b>831.468293</b>  | 416.237785        | 814.441744        | 407.724510       | 813.457728        | 407.2325         |

|    |             |            |             |            |             |            |   |            |            |            |            |            |          |
|----|-------------|------------|-------------|------------|-------------|------------|---|------------|------------|------------|------------|------------|----------|
| 6  | 590.329673  | 295.668475 | 573.303124  | 287.155200 | 572.319108  | 286.663192 | V | 703.373330 | 352.190303 | 686.346781 | 343.677029 | 685.362765 | 343.1850 |
| 7  | 661.366787  | 331.187032 | 644.340238  | 322.673757 | 643.356222  | 322.181749 | A | 604.304916 | 302.656096 | 587.278367 | 294.142822 | 586.294351 | 293.6508 |
| 8  | 762.414466  | 381.710871 | 745.387917  | 373.197597 | 744.403901  | 372.705589 | T | 533.267802 | 267.137539 | 516.241253 | 258.624265 | 515.257237 | 258.1322 |
| 9  | 890.473044  | 445.740160 | 873.446495  | 437.226886 | 872.462479  | 436.734878 | Q | 432.220123 | 216.613700 | 415.193574 | 208.100425 | 414.209558 | 207.6084 |
| 10 | 1019.515637 | 510.261457 | 1002.489088 | 501.748182 | 1001.505072 | 501.256174 | E | 304.161545 | 152.584411 | 287.134996 | 144.071136 | 286.150980 | 143.5791 |
| 11 |             |            |             |            |             |            | R | 175.118952 | 88.063114  | 158.092403 | 79.549840  |            |          |

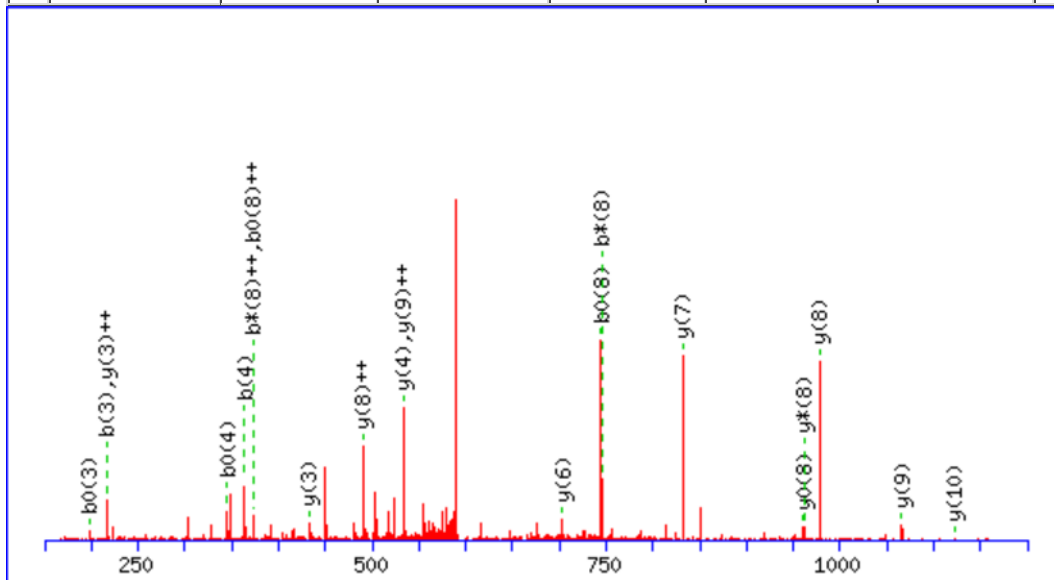

## Peptide View

MS/MS Fragmentation of **AHGQESAI FNEVAPGYFSR**

Found in **IPI00170635**, Tax\_Id=9606 Gene\_Symbol=SECTM1 Secreted and transmembrane protein 1

**Experiment:** 32 - OPA-2 **Fraction:** OPA-2

Match to Query 13554: 2078.985448 from(1040.500000,2+)

Title: OECHL100312\_11.16815.16815.2.dta

Data file \\BOROMIR\Masse\Data LTQ-Orbitrap\Chrystelle Lacroix\Etude clinique sJPU\OECHL100312\_11.raw

**Monoisotopic mass of neutral peptide Mr(calc):** 2078.980988**Fixed modifications:** Carbamidomethyl (C) (apply to specified residues or termini only)**Ions**

**Score:** 100 **Expect:** 1.6e-008**Matches :** 31/200 fragment ions using 49 most intense peaks ([help](#))

| #  | <b>b</b>    | <b>b<sup>++</sup></b> | <b>b*</b>   | <b>b<sup>*++</sup></b> | <b>b<sup>0</sup></b> | <b>b<sup>0++</sup></b> | Seq. | <b>y</b>    | <b>y<sup>++</sup></b> | <b>y*</b>   | <b>y<sup>*++</sup></b> | <b>y<sup>0</sup></b> | <b>y<sup>0++</sup></b> |
|----|-------------|-----------------------|-------------|------------------------|----------------------|------------------------|------|-------------|-----------------------|-------------|------------------------|----------------------|------------------------|
| 1  | 72.044390   | 36.525833             |             |                        |                      |                        | A    |             |                       |             |                        |                      |                        |
| 2  | 209.103302  | 105.055289            |             |                        |                      |                        | H    | 2008.951166 | 1004.979221           | 1991.924617 | 996.465947             | 1990.940601          | 995.973                |
| 3  | 266.124766  | 133.566021            |             |                        |                      |                        | G    | 1871.892254 | 936.449765            | 1854.865705 | 927.936491             | 1853.881689          | 927.444                |
| 4  | 394.183344  | 197.595310            | 377.156795  | 189.082035             |                      |                        | Q    | 1814.870790 | 907.939033            | 1797.844241 | 899.425759             | 1796.860225          | 898.933                |
| 5  | 523.225937  | 262.116607            | 506.199388  | 253.603332             | 505.215372           | 253.111324             | E    | 1686.812212 | 843.909744            | 1669.785663 | 835.396470             | 1668.801647          | 834.904                |
| 6  | 610.257965  | 305.632621            | 593.231416  | 297.119346             | 592.247400           | 296.627338             | S    | 1557.769619 | 779.388448            | 1540.743070 | 770.875173             | 1539.759054          | 770.383                |
| 7  | 681.295079  | 341.151178            | 664.268530  | 332.637903             | 663.284514           | 332.145895             | A    | 1470.737591 | 735.872434            | 1453.711042 | 727.359159             | 1452.727026          | 726.867                |
| 8  | 794.379143  | 397.693210            | 777.352594  | 389.179935             | 776.368578           | 388.687927             | I    | 1399.700477 | 700.353877            | 1382.673928 | 691.840602             | 1381.689912          | 691.348                |
| 9  | 941.447557  | 471.227417            | 924.421008  | 462.714142             | 923.436992           | 462.222134             | F    | 1286.616413 | 643.811845            | 1269.589864 | 635.298570             | 1268.605848          | 634.806                |
| 10 | 1055.490484 | 528.248880            | 1038.463935 | 519.735606             | 1037.479919          | 519.243597             | N    | 1139.547999 | 570.277638            | 1122.521450 | 561.764363             | 1121.537434          | 561.272                |
| 11 | 1184.533077 | 592.770176            | 1167.506528 | 584.256902             | 1166.522512          | 583.764894             | E    | 1025.505072 | 513.256174            | 1008.478523 | 504.742900             | 1007.494507          | 504.250                |
| 12 | 1283.601491 | 642.304383            | 1266.574942 | 633.791109             | 1265.590926          | 633.299101             | V    | 896.462479  | 448.734878            | 879.435930  | 440.221603             | 878.451914           | 439.729                |
| 13 | 1354.638605 | 677.822940            | 1337.612056 | 669.309666             | 1336.628040          | 668.817658             | A    | 797.394065  | 399.200671            | 780.367516  | 390.687396             | 779.383500           | 390.195                |
| 14 | 1451.691369 | 726.349322            | 1434.664820 | 717.836048             | 1433.680804          | 717.344040             | P    | 726.356951  | 363.682114            | 709.330402  | 355.168839             | 708.346386           | 354.676                |
| 15 | 1508.712833 | 754.860054            | 1491.686284 | 746.346780             | 1490.702268          | 745.854772             | G    | 629.304187  | 315.155732            | 612.277638  | 306.642457             | 611.293622           | 306.150                |
| 16 | 1671.776162 | 836.391719            | 1654.749613 | 827.878445             | 1653.765597          | 827.386436             | Y    | 572.282723  | 286.645000            | 555.256174  | 278.131725             | 554.272158           | 277.639                |
| 17 | 1818.844576 | 909.925926            | 1801.818027 | 901.412652             | 1800.834011          | 900.920643             | F    | 409.219394  | 205.113335            | 392.192845  | 196.600061             | 391.208829           | 196.108                |
| 18 | 1905.876604 | 953.441940            | 1888.850055 | 944.928666             | 1887.866039          | 944.436658             | S    | 262.150980  | 131.579128            | 245.124431  | 123.065854             | 244.140415           | 122.573                |
| 19 |             |                       |             |                        |                      |                        | R    | 175.118952  | 88.063114             | 158.092403  | 79.549840              |                      |                        |

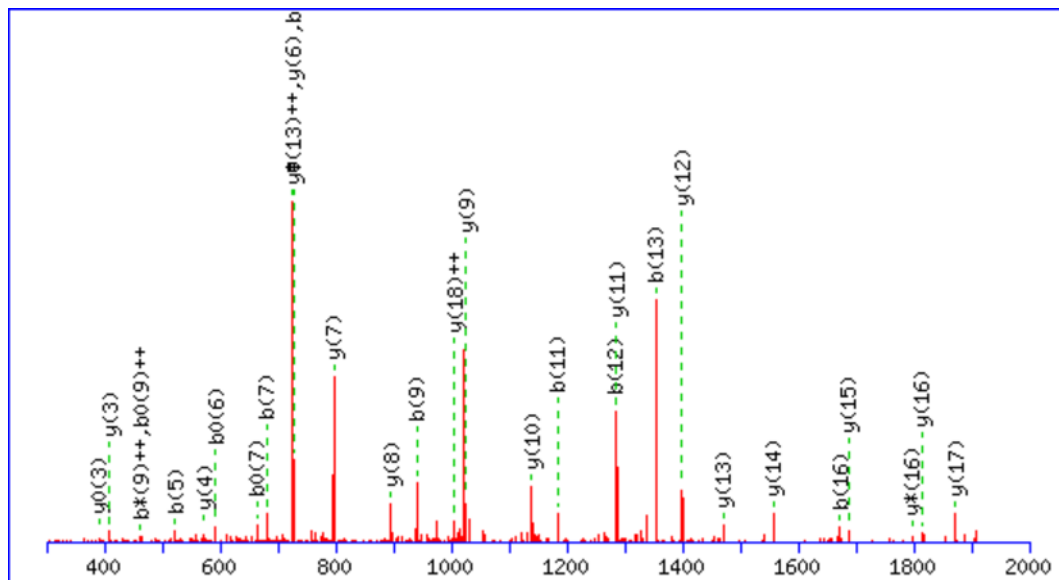

## Peptide View

MS/MS Fragmentation of **GLDTSLGAVQSDTGR**

Found in **IPI00289931**, Tax\_Id=9606 Gene\_Symbol=MADCAM1 MADCAM1 protein

**Experiment:** 32 - OPA-2 **Fraction:** OPA-2

Match to Query 8995: 1475.721448 from(738.868000,2+)

Title: OECHL100312\_11.11085.11085.2.dta

Data file \\BOROMIR\Masse\Data LTQ-Orbitrap\Chrystelle Lacroix\Etude clinique sJPU\OECHL100312\_11.raw

**Monoisotopic mass of neutral peptide Mr(calc):** 1475.721619 **Fixed modifications:** Carbamidomethyl (C) (apply to specified residues or termini only) **Ions**

**Score:** 102 **Expect:** 9.3e-009 **Matches :** 21/142 fragment ions using 26 most intense peaks ([help](#))

| # | b                 | b <sup>++</sup> | b* | b <sup>*++</sup> | b <sup>0</sup> | b <sup>0++</sup>  | Seq.     | y                  | y <sup>++</sup> | y*          | y <sup>*++</sup> | y <sup>0</sup> | y <sup>0++</sup> |
|---|-------------------|-----------------|----|------------------|----------------|-------------------|----------|--------------------|-----------------|-------------|------------------|----------------|------------------|
| 1 | 58.028740         | 29.518008       |    |                  |                |                   | <b>G</b> |                    |                 |             |                  |                |                  |
| 2 | 171.112804        | 86.060040       |    |                  |                |                   | <b>L</b> | 1419.707414        | 710.357345      | 1402.680865 | 701.844071       | 1401.696849    | 701.3520         |
| 3 | 286.139747        | 143.573512      |    |                  | 268.129182     | 134.568229        | <b>D</b> | <b>1306.623350</b> | 653.815313      | 1289.596801 | 645.302039       | 1288.612785    | 644.8100         |
| 4 | <b>387.187426</b> | 194.097351      |    |                  | 369.176861     | 185.092069        | <b>T</b> | <b>1191.596407</b> | 596.301842      | 1174.569858 | 587.788567       | 1173.585842    | <b>587.2965</b>  |
| 5 | <b>474.219454</b> | 237.613365      |    |                  | 456.208889     | <b>228.608082</b> | <b>S</b> | <b>1090.548728</b> | 545.778002      | 1073.522179 | 537.264728       | 1072.538163    | 536.7727         |



|    |                    |            |             |            |                   |            |          |                    |            |            |            |            |          |
|----|--------------------|------------|-------------|------------|-------------------|------------|----------|--------------------|------------|------------|------------|------------|----------|
| 6  | <b>587.303518</b>  | 294.155397 |             |            | 569.292953        | 285.150115 | <b>L</b> | <b>1003.516700</b> | 502.261988 | 986.490151 | 493.748714 | 985.506135 | 493.2567 |
| 7  | 644.324982         | 322.666129 |             |            | 626.314417        | 313.660847 | <b>G</b> | <b>890.432636</b>  | 445.719956 | 873.406087 | 437.206682 | 872.422071 | 436.7146 |
| 8  | 715.362096         | 358.184686 |             |            | <b>697.351531</b> | 349.179404 | <b>A</b> | 833.411172         | 417.209224 | 816.384623 | 408.695950 | 815.400607 | 408.2039 |
| 9  | 814.430510         | 407.718893 |             |            | 796.419945        | 398.713611 | <b>V</b> | <b>762.374058</b>  | 381.690667 | 745.347509 | 373.177393 | 744.363493 | 372.6853 |
| 10 | <b>942.489088</b>  | 471.748182 | 925.462539  | 463.234908 | 924.478523        | 462.742900 | <b>Q</b> | <b>663.305644</b>  | 332.156460 | 646.279095 | 323.643186 | 645.295079 | 323.1511 |
| 11 | <b>1029.521116</b> | 515.264196 | 1012.494567 | 506.750922 | 1011.510551       | 506.258914 | <b>S</b> | <b>535.247066</b>  | 268.127171 | 518.220517 | 259.613897 | 517.236501 | 259.1218 |
| 12 | <b>1144.548059</b> | 572.777668 | 1127.521510 | 564.264393 | 1126.537494       | 563.772385 | <b>D</b> | <b>448.215038</b>  | 224.611157 | 431.188489 | 216.097882 | 430.204473 | 215.6058 |
| 13 | <b>1245.595738</b> | 623.301507 | 1228.569189 | 614.788233 | 1227.585173       | 614.296225 | <b>T</b> | <b>333.188095</b>  | 167.097685 | 316.161546 | 158.584411 | 315.177530 | 158.0924 |
| 14 | 1302.617202        | 651.812239 | 1285.590653 | 643.298965 | 1284.606637       | 642.806957 | <b>G</b> | <b>232.140416</b>  | 116.573846 | 215.113867 | 108.060571 |            |          |
| 15 |                    |            |             |            |                   |            | <b>R</b> | 175.118952         | 88.063114  | 158.092403 | 79.549839  |            |          |

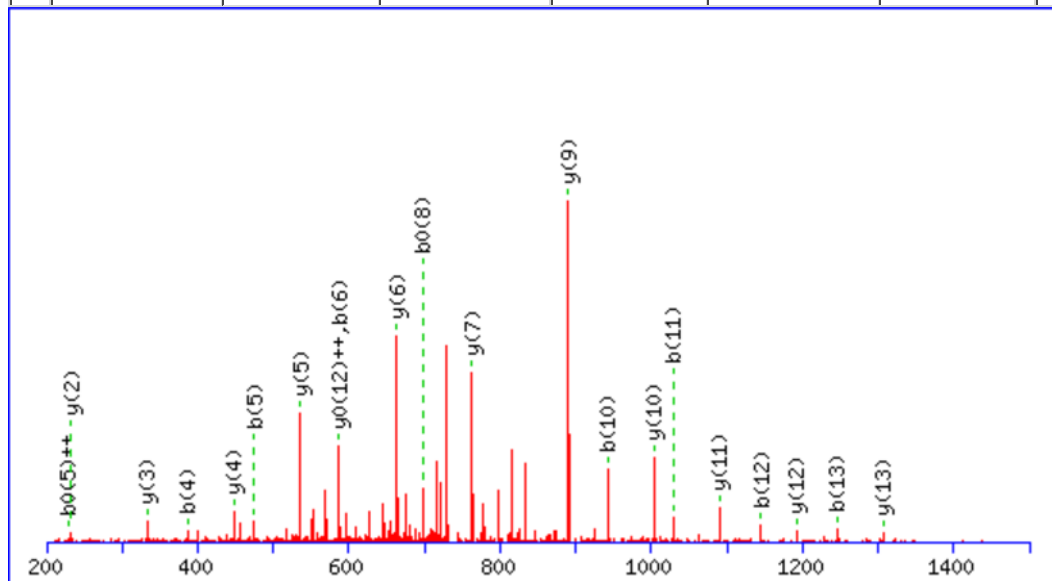

## Peptide View

MS/MS Fragmentation of **LEGEACGVYTPR**

Found in **IPI00297284**, Tax\_Id=9606 Gene\_Symbol=IGFBP2 Insulin-like growth factor-binding protein 2

Experiment: 32 - OPA-2 Fraction: OPA-2

Match to Query 7746: 1350.626248 from(676.320400,2+)

Title: OECHL100312\_11.8496.8496.2.dta

Data file \\BOROMIR\Masse\Data LTQ-Orbitrap\Chrystelle Lacroix\Etude clinique sJPU\OECHL100312\_11.raw

**Monoisotopic mass of neutral peptide Mr(calc):** 1350.623795**Fixed modifications:** Carbamidomethyl (C) (apply to specified residues or termini only)**Ions****Score:** 56 **Expect:** 0.00025**Matches :** 27/104 fragment ions using 60 most intense peaks ([help](#))

| #  | b                  | b <sup>++</sup>   | b <sup>0</sup>     | b <sup>0++</sup> | Seq. | y                  | y <sup>++</sup>   | y*                 | y* <sup>++</sup>  | y <sup>0</sup> | y <sup>0++</sup>  | #  |
|----|--------------------|-------------------|--------------------|------------------|------|--------------------|-------------------|--------------------|-------------------|----------------|-------------------|----|
| 1  | 114.091340         | 57.549308         |                    |                  | L    |                    |                   |                    |                   |                |                   | 12 |
| 2  | <b>243.133933</b>  | 122.070605        | 225.123368         | 113.065322       | E    | 1238.547015        | 619.777146        | <b>1221.520466</b> | <b>611.263871</b> | 1220.536450    | 610.771863        | 11 |
| 3  | <b>300.155397</b>  | 150.581336        | 282.144832         | 141.576054       | G    | <b>1109.504422</b> | <b>555.255849</b> | 1092.477873        | <b>546.742575</b> | 1091.493857    | <b>546.250567</b> | 10 |
| 4  | <b>429.197990</b>  | <b>215.102633</b> | <b>411.187425</b>  | 206.097351       | E    | <b>1052.482958</b> | 526.745117        | 1035.456409        | 518.231843        | 1034.472393    | 517.739835        | 9  |
| 5  | <b>500.235104</b>  | 250.621190        | 482.224539         | 241.615908       | A    | <b>923.440365</b>  | 462.223821        | 906.413816         | 453.710546        | 905.429800     | 453.218538        | 8  |
| 6  | <b>660.265753</b>  | 330.636515        | 642.255188         | 321.631232       | C    | <b>852.403251</b>  | 426.705264        | 835.376702         | 418.191989        | 834.392686     | 417.699981        | 7  |
| 7  | <b>717.287217</b>  | 359.147247        | 699.276652         | 350.141964       | G    | <b>692.372602</b>  | 346.689939        | 675.346053         | 338.176665        | 674.362037     | 337.684657        | 6  |
| 8  | <b>816.355631</b>  | 408.681454        | <b>798.345066</b>  | 399.676171       | V    | 635.351138         | 318.179207        | 618.324589         | 309.665933        | 617.340573     | 309.173925        | 5  |
| 9  | <b>979.418960</b>  | 490.213118        | 961.408395         | 481.207836       | Y    | <b>536.282724</b>  | 268.645000        | 519.256175         | 260.131726        | 518.272159     | 259.639718        | 4  |
| 10 | <b>1080.466639</b> | 540.736958        | <b>1062.456074</b> | 531.731675       | T    | <b>373.219395</b>  | 187.113335        | 356.192846         | 178.600061        | 355.208830     | 178.108053        | 3  |
| 11 | <b>1177.519403</b> | 589.263340        | 1159.508838        | 580.258057       | P    | <b>272.171716</b>  | 136.589496        | 255.145167         | 128.076221        |                |                   | 2  |
| 12 |                    |                   |                    |                  | R    | 175.118952         | 88.063114         | 158.092403         | 79.549839         |                |                   | 1  |

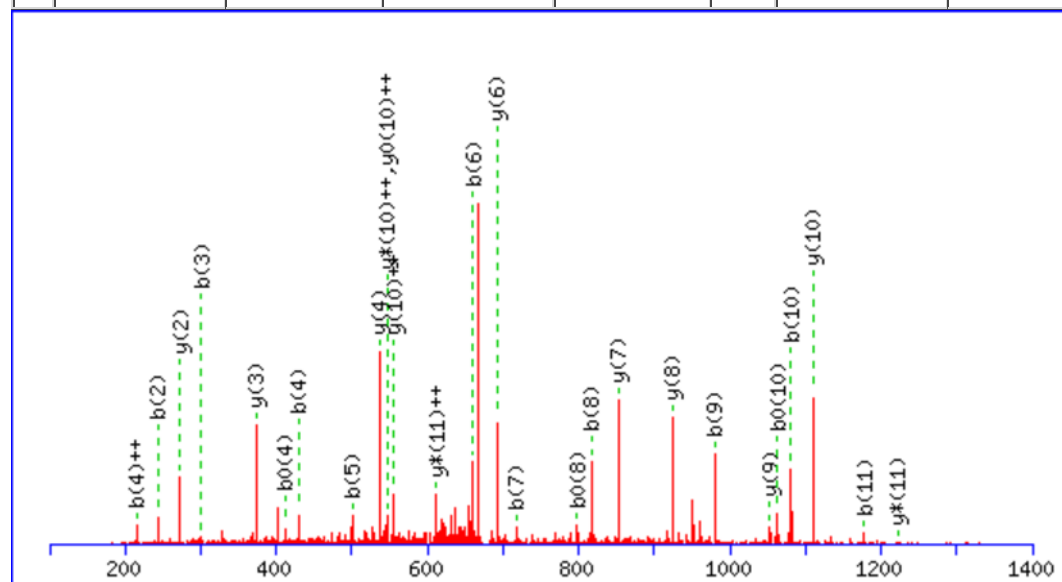

## Peptide View

MS/MS Fragmentation of **DFSLTSSSQTPGATK**

Found in **IPI00291300**, Tax\_Id=9606 Gene\_Symbol=PODXL2 Putative uncharacterized protein PODXL2

Experiment: 32 - OPA-2 Fraction: OPA-2

Match to Query 9514: 1525.726848 from(763.870700,2+)

Title: OECHL100312\_11.10705.10705.2.dta

Data file \\BOROMIR\Masse\Data LTQ-Orbitrap\Chrystelle Lacroix\Etude clinique sJPU\OECHL100312\_11.raw

**Monoisotopic mass of neutral peptide Mr(calc): 1525.726028** Fixed modifications: Carbamidomethyl (C) (apply to specified residues or termini only) Ions

Score: 62 Expect: 7e-005 Matches : 23/150 fragment ions using 37 most intense peaks ([help](#))

| #  | b                  | b <sup>++</sup> | b <sup>*</sup> | b <sup>*++</sup> | b <sup>0</sup>    | b <sup>0++</sup> | Seq. | y                  | y <sup>++</sup>   | y <sup>*</sup>    | y <sup>*++</sup>  | y <sup>0</sup> | y <sup>0++</sup> |
|----|--------------------|-----------------|----------------|------------------|-------------------|------------------|------|--------------------|-------------------|-------------------|-------------------|----------------|------------------|
| 1  | 116.034219         | 58.520748       |                |                  | 98.023654         | 49.515465        | D    |                    |                   |                   |                   |                |                  |
| 2  | <b>263.102633</b>  | 132.054954      |                |                  | 245.092068        | 123.049672       | F    | 1411.706351        | 706.356813        | 1394.679802       | 697.843539        | 1393.695786    | 697.3515         |
| 3  | <b>350.134661</b>  | 175.570968      |                |                  | <b>332.124096</b> | 166.565686       | S    | 1264.637937        | <b>632.822607</b> | 1247.611388       | 624.309332        | 1246.627372    | 623.8173         |
| 4  | 463.218725         | 232.113001      |                |                  | 445.208160        | 223.107718       | L    | <b>1177.605909</b> | 589.306592        | 1160.579360       | 580.793318        | 1159.595344    | 580.3013         |
| 5  | <b>564.266404</b>  | 282.636840      |                |                  | 546.255839        | 273.631558       | T    | 1064.521845        | 532.764561        | 1047.495296       | 524.251286        | 1046.511280    | 523.7592         |
| 6  | 651.298432         | 326.152854      |                |                  | <b>633.287867</b> | 317.147572       | S    | <b>963.474166</b>  | 482.240721        | 946.447617        | <b>473.727446</b> | 945.463601     | <b>473.2354</b>  |
| 7  | 738.330460         | 369.668868      |                |                  | 720.319895        | 360.663586       | S    | <b>876.442138</b>  | 438.724707        | 859.415589        | 430.211432        | 858.431573     | 429.7194         |
| 8  | <b>825.362488</b>  | 413.184882      |                |                  | 807.351923        | 404.179599       | S    | 789.410110         | 395.208693        | 772.383561        | 386.695418        | 771.399545     | 386.2034         |
| 9  | <b>953.421066</b>  | 477.214171      | 936.394517     | 468.700897       | 935.410501        | 468.208889       | Q    | <b>702.378082</b>  | 351.692679        | <b>685.351533</b> | 343.179404        | 684.367517     | 342.6873         |
| 10 | <b>1054.468745</b> | 527.738010      | 1037.442196    | 519.224736       | 1036.458180       | 518.732728       | T    | <b>574.319504</b>  | 287.663390        | 557.292955        | 279.150115        | 556.308939     | 278.6581         |
| 11 | 1151.521509        | 576.264392      | 1134.494960    | 567.751118       | 1133.510944       | 567.259110       | P    | <b>473.271825</b>  | 237.139550        | 456.245276        | 228.626276        | 455.261260     | 228.1342         |
| 12 | <b>1208.542973</b> | 604.775124      | 1191.516424    | 596.261850       | 1190.532408       | 595.769842       | G    | <b>376.219061</b>  | 188.613168        | 359.192512        | 180.099894        | 358.208496     | 179.6078         |
| 13 | <b>1279.580087</b> | 640.293681      | 1262.553538    | 631.780407       | 1261.569522       | 631.288399       | A    | 319.197597         | 160.102436        | 302.171048        | 151.589162        | 301.187032     | 151.0971         |
| 14 | <b>1380.627766</b> | 690.817521      | 1363.601217    | 682.304246       | 1362.617201       | 681.812238       | T    | <b>248.160483</b>  | 124.583879        | 231.133934        | 116.070605        | 230.149918     | 115.5785         |
| 15 |                    |                 |                |                  |                   |                  | K    | 147.112804         | 74.060040         | 130.086255        | 65.546765         |                |                  |

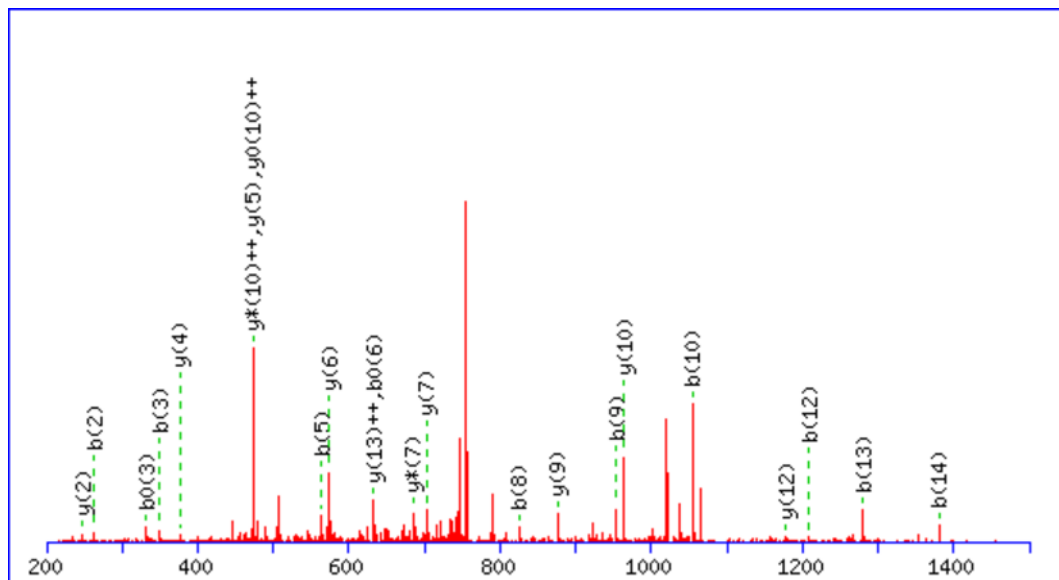

## Peptide View

MS/MS Fragmentation of **SDAAVDTSSSEITTK**

Found in **IPI00412977**, Tax\_Id=9606 Gene\_Symbol=- Prothymosin alpha

**Experiment:** 32 - OPA-2 **Fraction:** OPA-2

Match to Query 8844: 1465.677048 from(733.845800,2+)

Title: OECHL100312\_11.9693.9693.2.dta

Data file \\BOROMIR\Masse\Data LTQ-Orbitrap\Chrystelle Lacroix\Etude clinique sJPU\OECHL100312\_11.raw

**Monoisotopic mass of neutral peptide Mr(calc):** 1465.678391 **Fixed modifications:** Carbamidomethyl (C) (apply to specified residues or termini only) **Variable**

**modifications:** N-term : Acetyl (N-term) **Ions Score:** 67 **Expect:** 1.5e-005 **Matches :** 32/128 fragment ions using 47 most intense peaks ([help](#))

| # | b          | b <sup>++</sup> | b <sup>0</sup> | b <sup>0++</sup> | Seq. | y           | y <sup>++</sup> | y*          | y <sup>*++</sup> | y <sup>0</sup> | y <sup>0++</sup> | #  |
|---|------------|-----------------|----------------|------------------|------|-------------|-----------------|-------------|------------------|----------------|------------------|----|
| 1 | 130.049869 | 65.528572       | 112.039304     | 56.523290        | S    |             |                 |             |                  |                |                  | 14 |
| 2 | 245.076812 | 123.042044      | 227.066247     | 114.036761       | D    | 1337.643082 | 669.325179      | 1320.616533 | 660.811905       | 1319.632517    | 660.319897       | 13 |
| 3 | 316.113926 | 158.560601      | 298.103361     | 149.555319       | A    | 1222.616139 | 611.811708      | 1205.589590 | 603.298433       | 1204.605574    | 602.806425       | 12 |
| 4 | 387.151040 | 194.079158      | 369.140475     | 185.073875       | A    | 1151.579025 | 576.293151      | 1134.552476 | 567.779876       | 1133.568460    | 567.287868       | 11 |
| 5 | 486.219454 | 243.613365      | 468.208889     | 234.608082       | V    | 1080.541911 | 540.774594      | 1063.515362 | 532.261319       | 1062.531346    | 531.769311       | 10 |

|    |                    |                   |                    |                   |          |                   |                   |            |            |                   |            |          |
|----|--------------------|-------------------|--------------------|-------------------|----------|-------------------|-------------------|------------|------------|-------------------|------------|----------|
| 6  | <b>601.246397</b>  | 301.126837        | 583.235832         | 292.121554        | <b>D</b> | <b>981.473497</b> | 491.240387        | 964.446948 | 482.727112 | <b>963.462932</b> | 482.235104 | <b>9</b> |
| 7  | <b>702.294076</b>  | 351.650676        | 684.283511         | 342.645394        | <b>T</b> | <b>866.446554</b> | 433.726915        | 849.420005 | 425.213641 | 848.435989        | 424.721633 | <b>8</b> |
| 8  | 789.326104         | 395.166690        | <b>771.315539</b>  | 386.161408        | <b>S</b> | <b>765.398875</b> | 383.203076        | 748.372326 | 374.689801 | 747.388310        | 374.197793 | <b>7</b> |
| 9  | 876.358132         | 438.682704        | <b>858.347567</b>  | 429.677421        | <b>S</b> | <b>678.366847</b> | 339.687062        | 661.340298 | 331.173787 | 660.356282        | 330.681779 | <b>6</b> |
| 10 | 1005.400725        | 503.204001        | <b>987.390160</b>  | 494.198718        | <b>E</b> | <b>591.334819</b> | <b>296.171048</b> | 574.308270 | 287.657773 | 573.324254        | 287.165765 | <b>5</b> |
| 11 | <b>1118.484789</b> | <b>559.746033</b> | <b>1100.474224</b> | 550.740750        | <b>I</b> | <b>462.292226</b> | 231.649751        | 445.265677 | 223.136477 | <b>444.281661</b> | 222.644469 | <b>4</b> |
| 12 | <b>1219.532468</b> | 610.269872        | <b>1201.521903</b> | <b>601.264590</b> | <b>T</b> | <b>349.208162</b> | 175.107719        | 332.181613 | 166.594445 | 331.197597        | 166.102437 | <b>3</b> |
| 13 | <b>1320.580147</b> | 660.793712        | <b>1302.569582</b> | 651.788429        | <b>T</b> | <b>248.160483</b> | 124.583879        | 231.133934 | 116.070605 | 230.149918        | 115.578597 | <b>2</b> |
| 14 |                    |                   |                    |                   | <b>K</b> | 147.112804        | 74.060040         | 130.086255 | 65.546765  |                   |            | <b>1</b> |

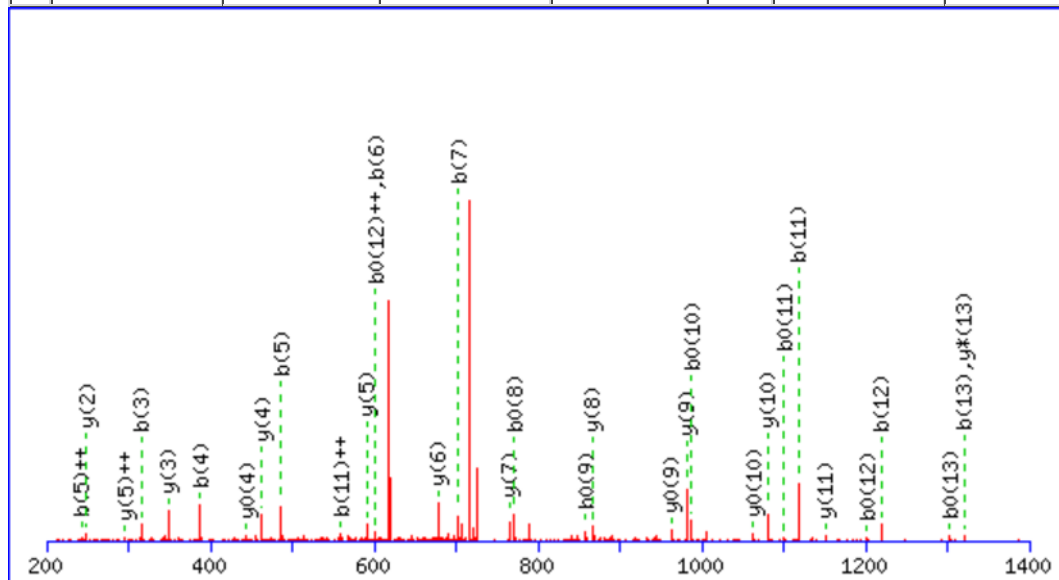

## Peptide View

MS/MS Fragmentation of **SCSSCVATDPDSIGAAHLIFCCFR**

Found in **IPI00022620**, Tax\_Id=9606 Gene\_Symbol=SLURP1 Secreted Ly-6/uPAR-related protein 1

**Experiment:** 32 - OPA-2 **Fraction:** OPA-2

Match to Query 15924: 2817.197448 from(1409.606000,2+)

Title: OECHL100312\_11.18623.18623.2.dta

Data file \\BOROMIR\Masse\Data LTQ-Orbitrap\Chrystelle Lacroix\Etude clinique sJPU\OECHL100312\_11.raw

**Monoisotopic mass of neutral peptide Mr(calc):** 2817.197922**Fixed modifications:** Carbamidomethyl (C) (apply to specified residues or termini only)**Ions****Score:** 77 **Expect:** 1.1e-006**Matches :** 24/216 fragment ions using 32 most intense peaks ([help](#))

| #  | b                  | b <sup>++</sup>    | b <sup>0</sup>     | b <sup>0++</sup>  | Seq. | y                  | y <sup>++</sup>   | y*          | y* <sup>++</sup> | y <sup>0</sup>     | y <sup>0++</sup> | #  |
|----|--------------------|--------------------|--------------------|-------------------|------|--------------------|-------------------|-------------|------------------|--------------------|------------------|----|
| 1  | 88.039304          | 44.523290          | 70.028739          | 35.518008         | S    |                    |                   |             |                  |                    |                  | 25 |
| 2  | 248.069953         | 124.538614         | 230.059388         | 115.533332        | C    | 2731.173141        | 1366.090208       | 2714.146592 | 1357.576934      | 2713.162576        | 1357.084926      | 24 |
| 3  | 335.101981         | 168.054628         | 317.091416         | 159.049346        | S    | 2571.142492        | 1286.074884       | 2554.115943 | 1277.561609      | 2553.131927        | 1277.069601      | 23 |
| 4  | 422.134009         | 211.570642         | 404.123444         | 202.565360        | S    | 2484.110464        | 1242.558870       | 2467.083915 | 1234.045595      | 2466.099899        | 1233.553587      | 22 |
| 5  | 509.166037         | 255.086656         | 491.155472         | 246.081374        | S    | 2397.078436        | 1199.042856       | 2380.051887 | 1190.529581      | 2379.067871        | 1190.037573      | 21 |
| 6  | 669.196686         | 335.101981         | 651.186121         | 326.096699        | C    | 2310.046408        | 1155.526842       | 2293.019859 | 1147.013567      | 2292.035843        | 1146.521559      | 20 |
| 7  | 768.265100         | 384.636188         | 750.254535         | 375.630905        | V    | 2150.015759        | 1075.511517       | 2132.989210 | 1066.998243      | 2132.005194        | 1066.506235      | 19 |
| 8  | 839.302214         | 420.154745         | 821.291649         | 411.149462        | A    | 2050.947345        | 1025.977310       | 2033.920796 | 1017.464036      | 2032.936780        | 1016.972028      | 18 |
| 9  | <b>940.349893</b>  | 470.678585         | 922.339328         | 461.673302        | T    | <b>1979.910231</b> | 990.458753        | 1962.883682 | 981.945479       | 1961.899666        | 981.453471       | 17 |
| 10 | <b>1055.376836</b> | 528.192056         | 1037.366271        | 519.186773        | D    | <b>1878.862552</b> | <b>939.934914</b> | 1861.836003 | 931.421639       | 1860.851987        | 930.929631       | 16 |
| 11 | <b>1152.429600</b> | 576.718438         | 1134.419035        | 567.713155        | P    | <b>1763.835609</b> | 882.421442        | 1746.809060 | 873.908168       | 1745.825044        | 873.416160       | 15 |
| 12 | 1267.456543        | 634.231910         | 1249.445978        | 625.226627        | D    | <b>1666.782845</b> | 833.895060        | 1649.756296 | 825.381786       | <b>1648.772280</b> | 824.889778       | 14 |
| 13 | 1354.488571        | 677.747924         | 1336.478006        | 668.742641        | S    | <b>1551.755902</b> | 776.381589        | 1534.729353 | 767.868314       | 1533.745337        | 767.376306       | 13 |
| 14 | 1467.572635        | 734.289956         | 1449.562070        | 725.284673        | I    | <b>1464.723874</b> | 732.865575        | 1447.697325 | 724.352300       |                    |                  | 12 |
| 15 | 1524.594099        | 762.800687         | 1506.583534        | 753.795405        | G    | <b>1351.639810</b> | 676.323543        | 1334.613261 | 667.810268       |                    |                  | 11 |
| 16 | 1595.631213        | 798.319244         | 1577.620648        | <b>789.313962</b> | A    | 1294.618346        | 647.812811        | 1277.591797 | 639.299536       |                    |                  | 10 |
| 17 | <b>1666.668327</b> | 833.837801         | <b>1648.657762</b> | 824.832519        | A    | <b>1223.581232</b> | 612.294254        | 1206.554683 | 603.780979       |                    |                  | 9  |
| 18 | 1803.727239        | <b>902.367257</b>  | 1785.716674        | 893.361975        | H    | <b>1152.544118</b> | 576.775697        | 1135.517569 | 568.262422       |                    |                  | 8  |
| 19 | <b>1916.811303</b> | 958.909289         | 1898.800738        | 949.904007        | L    | <b>1015.485206</b> | 508.246241        | 998.458657  | 499.732966       |                    |                  | 7  |
| 20 | 2029.895367        | <b>1015.451321</b> | 2011.884802        | 1006.446039       | I    | <b>902.401142</b>  | 451.704209        | 885.374593  | 443.190934       |                    |                  | 6  |
| 21 | 2176.963781        | 1088.985528        | 2158.953216        | 1079.980246       | F    | <b>789.317078</b>  | 395.162177        | 772.290529  | 386.648902       |                    |                  | 5  |
| 22 | 2336.994430        | 1169.000853        | 2318.983865        | 1159.995570       | C    | <b>642.248664</b>  | 321.627970        | 625.222115  | 313.114695       |                    |                  | 4  |
| 23 | 2497.025079        | 1249.016177        | 2479.014514        | 1240.010895       | C    | 482.218015         | 241.612645        | 465.191466  | 233.099371       |                    |                  | 3  |
| 24 | 2644.093493        | 1322.550384        | 2626.082928        | 1313.545102       | F    | 322.187366         | 161.597321        | 305.160817  | 153.084046       |                    |                  | 2  |
| 25 |                    |                    |                    |                   | R    | 175.118952         | 88.063114         | 158.092403  | 79.549839        |                    |                  | 1  |

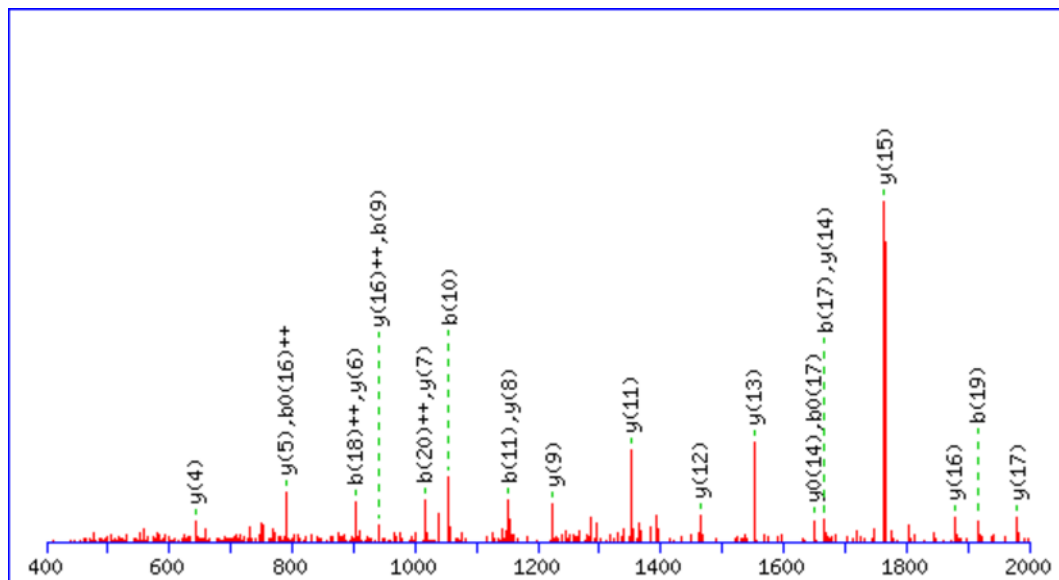

## Peptide View

MS/MS Fragmentation of **LLYDASNLETGVPSR**

Found in **IPI0003111**, Tax\_Id=9606 Gene\_Symbol=LOC652694 Ig kappa chain V-I region AU

**Experiment:** 32 - OPA-2 **Fraction:** OPA-2

Match to Query 11600: 1746.916848 from(874.465700,2+)

Title: OECHL100312\_11.16524.16524.2.dta

Data file \\BOROMIR\Masse\Data LTQ-Orbitrap\Chrystelle Lacroix\Etude clinique sJPU\OECHL100312\_11.raw

**Monoisotopic mass of neutral peptide Mr(calc):** 1746.915192 **Fixed modifications:** Carbamidomethyl (C) (apply to specified residues or termini only) **Ions**

**Score:** 67 **Expect:** 2e-005 **Matches :** 23/156 fragment ions using 42 most intense peaks ([help](#))

| # | b                 | b <sup>++</sup> | b <sup>*</sup> | b <sup>*++</sup> | b <sup>0</sup> | b <sup>0++</sup> | Seq. | y                  | y <sup>++</sup> | y <sup>*</sup> | y <sup>*++</sup> | y <sup>0</sup>     | y <sup>0++</sup> |
|---|-------------------|-----------------|----------------|------------------|----------------|------------------|------|--------------------|-----------------|----------------|------------------|--------------------|------------------|
| 1 | 114.091340        | 57.549308       |                |                  |                |                  | L    |                    |                 |                |                  |                    |                  |
| 2 | 227.175404        | 114.091340      |                |                  |                |                  | L    | 1634.838427        | 817.922852      | 1617.811878    | 809.409577       | 1616.827862        | 808.9175         |
| 3 | 340.259468        | 170.633372      |                |                  |                |                  | I    | <b>1521.754363</b> | 761.380820      | 1504.727814    | 752.867545       | 1503.743798        | 752.3755         |
| 4 | 503.322797        | 252.165036      |                |                  |                |                  | Y    | 1408.670299        | 704.838788      | 1391.643750    | 696.325513       | <b>1390.659734</b> | 695.8335         |
| 5 | <b>618.349740</b> | 309.678508      |                |                  | 600.339175     | 300.673226       | D    | <b>1245.606970</b> | 623.307123      | 1228.580421    | 614.793849       | 1227.596405        | 614.3018         |

|    |                    |                   |                    |            |             |            |   |                    |            |                   |            |                   |          |
|----|--------------------|-------------------|--------------------|------------|-------------|------------|---|--------------------|------------|-------------------|------------|-------------------|----------|
| 6  | 689.386854         | 345.197065        |                    |            | 671.376289  | 336.191782 | A | 1130.580027        | 565.793652 | 1113.553478       | 557.280377 | 1112.569462       | 556.7883 |
| 7  | 776.418882         | 388.713079        |                    |            | 758.408317  | 379.707796 | S | <b>1059.542913</b> | 530.275095 | 1042.516364       | 521.761820 | 1041.532348       | 521.2698 |
| 8  | <b>890.461809</b>  | 445.734542        | 873.435260         | 437.221268 | 872.451244  | 436.729260 | N | <b>972.510885</b>  | 486.759081 | 955.484336        | 478.245806 | 954.500320        | 477.7537 |
| 9  | <b>1003.545873</b> | 502.276574        | 986.519324         | 493.763300 | 985.535308  | 493.271292 | L | <b>858.467958</b>  | 429.737617 | 841.441409        | 421.224343 | 840.457393        | 420.7323 |
| 10 | <b>1132.588466</b> | 566.797871        | 1115.561917        | 558.284597 | 1114.577901 | 557.792588 | E | <b>745.383894</b>  | 373.195585 | 728.357345        | 364.682311 | 727.373329        | 364.1903 |
| 11 | <b>1233.636145</b> | <b>617.321710</b> | 1216.609596        | 608.808436 | 1215.625580 | 608.316428 | T | <b>616.341301</b>  | 308.674289 | 599.314752        | 300.161014 | 598.330736        | 299.6690 |
| 12 | <b>1290.657609</b> | 645.832442        | 1273.631060        | 637.319168 | 1272.647044 | 636.827160 | G | <b>515.293622</b>  | 258.150449 | 498.267073        | 249.637175 | 497.283057        | 249.1451 |
| 13 | <b>1389.726023</b> | 695.366649        | <b>1372.699474</b> | 686.853375 | 1371.715458 | 686.361367 | V | <b>458.272158</b>  | 229.639717 | 441.245609        | 221.126443 | 440.261593        | 220.6344 |
| 14 | 1486.778787        | 743.893032        | 1469.752238        | 735.379757 | 1468.768222 | 734.887749 | P | <b>359.203744</b>  | 180.105510 | <b>342.177195</b> | 171.592236 | <b>341.193179</b> | 171.1002 |
| 15 | <b>1573.810815</b> | 787.409046        | 1556.784266        | 778.895771 | 1555.800250 | 778.403763 | S | 262.150980         | 131.579128 | 245.124431        | 123.065854 | 244.140415        | 122.5738 |
| 16 |                    |                   |                    |            |             |            | R | 175.118952         | 88.063114  | 158.092403        | 79.549839  |                   |          |

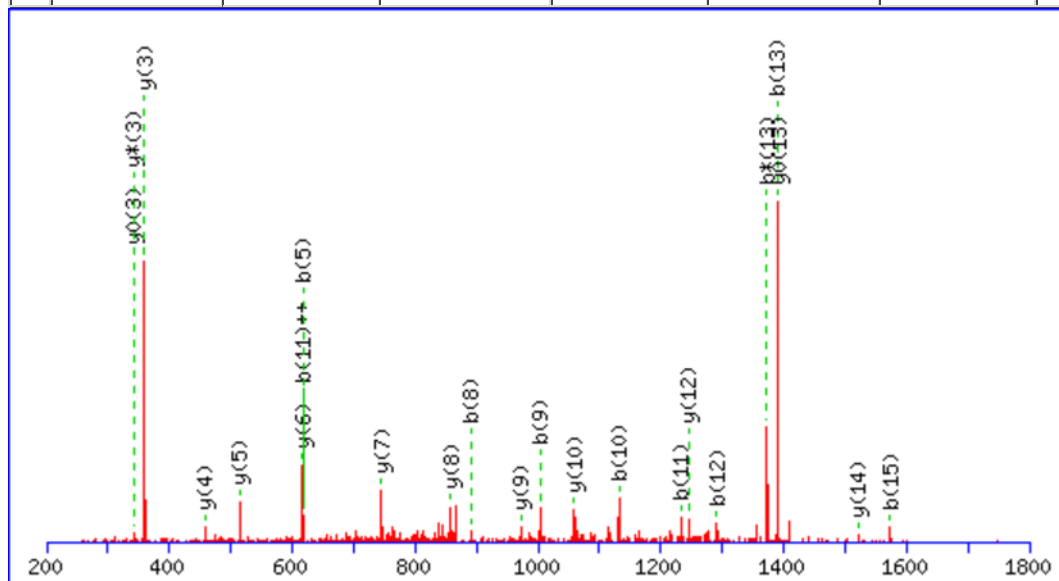

## Peptide View

MS/MS Fragmentation of **EVQLVESGGGLVKPGGSLR**

Found in **IPI00783024**, Tax\_Id=9606 Gene\_Symbol=- Myosin-reactive immunoglobulin heavy chain variable region (Fragment)



**Experiment:** 32 - OPA-2 **Fraction:** OPA-2

Match to Query 12562: 1881.033248 from(941.523900,2+)

Title: OECHL100312\_11.13367.13367.2.dta

Data file \\BOROMIR\Masse\Data LTQ-Orbitrap\Chrystelle Lacroix\Etude clinique sJPU\OECHL100312\_11.raw

**Monoisotopic mass of neutral peptide Mr(calc):** 1881.031982**Fixed modifications:** Carbamidomethyl (C) (apply to specified residues or termini only)**Ions****Score:** 59 **Expect:** 6e-005**Matches :** 17/208 fragment ions using 31 most intense peaks ([help](#))

| #  | <b>b</b>           | <b>b<sup>++</sup></b> | <b>b*</b>   | <b>b*<sup>++</sup></b> | <b>b<sup>0</sup></b> | <b>b<sup>0++</sup></b> | Seq.     | <b>y</b>           | <b>y<sup>++</sup></b> | <b>y*</b>   | <b>y*<sup>++</sup></b> | <b>y<sup>0</sup></b> | <b>y<sup>0++</sup></b> |
|----|--------------------|-----------------------|-------------|------------------------|----------------------|------------------------|----------|--------------------|-----------------------|-------------|------------------------|----------------------|------------------------|
| 1  | 130.049869         | 65.528572             |             |                        | 112.039304           | 56.523290              | <b>E</b> |                    |                       |             |                        |                      |                        |
| 2  | 229.118283         | 115.062780            |             |                        | 211.107718           | 106.057497             | <b>V</b> | 1752.996660        | 877.001968            | 1735.970111 | 868.488694             | 1734.986095          | 867.9966               |
| 3  | <b>357.176861</b>  | 179.092069            | 340.150312  | 170.578794             | <b>339.166296</b>    | 170.086786             | <b>Q</b> | 1653.928246        | 827.467761            | 1636.901697 | 818.954487             | 1635.917681          | 818.4624               |
| 4  | 470.260925         | 235.634101            | 453.234376  | 227.120826             | <b>452.250360</b>    | 226.628818             | <b>L</b> | <b>1525.869668</b> | 763.438472            | 1508.843119 | 754.925198             | 1507.859103          | 754.4331               |
| 5  | 569.329339         | 285.168308            | 552.302790  | 276.655033             | <b>551.318774</b>    | 276.163025             | <b>V</b> | <b>1412.785604</b> | 706.896440            | 1395.759055 | 698.383166             | 1394.775039          | 697.8911               |
| 6  | 698.371932         | 349.689604            | 681.345383  | 341.176330             | 680.361367           | 340.684322             | <b>E</b> | <b>1313.717190</b> | 657.362233            | 1296.690641 | 648.848959             | 1295.706625          | 648.3569               |
| 7  | 785.403960         | 393.205618            | 768.377411  | 384.692344             | 767.393395           | 384.200336             | <b>S</b> | <b>1184.674597</b> | 592.840937            | 1167.648048 | 584.327662             | 1166.664032          | 583.8356               |
| 8  | 842.425424         | 421.716350            | 825.398875  | 413.203076             | 824.414859           | 412.711068             | <b>G</b> | <b>1097.642569</b> | 549.324923            | 1080.616020 | 540.811648             | 1079.632004          | 540.3196               |
| 9  | 899.446888         | 450.227082            | 882.420339  | 441.713808             | 881.436323           | 441.221800             | <b>G</b> | <b>1040.621105</b> | 520.814191            | 1023.594556 | 512.300916             | 1022.610540          | 511.8089               |
| 10 | 956.468352         | 478.737814            | 939.441803  | 470.224540             | 938.457787           | 469.732532             | <b>G</b> | <b>983.599641</b>  | 492.303459            | 966.573092  | 483.790184             | 965.589076           | 483.2981               |
| 11 | 1069.552416        | 535.279846            | 1052.525867 | 526.766572             | 1051.541851          | 526.274564             | <b>L</b> | 926.578177         | 463.792727            | 909.551628  | 455.279452             | 908.567612           | 454.7874               |
| 12 | 1168.620830        | 584.814053            | 1151.594281 | 576.300779             | 1150.610265          | 575.808771             | <b>V</b> | <b>813.494113</b>  | 407.250695            | 796.467564  | 398.737420             | 795.483548           | 398.2454               |
| 13 | 1296.715793        | 648.861535            | 1279.689244 | 640.348260             | 1278.705228          | 639.856252             | <b>K</b> | <b>714.425699</b>  | <b>357.716487</b>     | 697.399150  | 349.203213             | 696.415134           | 348.7112               |
| 14 | 1393.768557        | 697.387917            | 1376.742008 | 688.874642             | 1375.757992          | 688.382634             | <b>P</b> | <b>586.330736</b>  | 293.669006            | 569.304187  | 285.155731             | 568.320171           | 284.6637               |
| 15 | 1450.790021        | 725.898649            | 1433.763472 | 717.385374             | 1432.779456          | 716.893366             | <b>G</b> | 489.277972         | 245.142624            | 472.251423  | 236.629349             | 471.267407           | 236.1373               |
| 16 | 1507.811485        | 754.409381            | 1490.784936 | 745.896106             | 1489.800920          | 745.404098             | <b>G</b> | 432.256508         | 216.631892            | 415.229959  | 208.118617             | 414.245943           | 207.6266               |
| 17 | 1594.843513        | 797.925395            | 1577.816964 | 789.412120             | 1576.832948          | 788.920112             | <b>S</b> | 375.235044         | 188.121160            | 358.208495  | 179.607885             | <b>357.224479</b>    | 179.1158               |
| 18 | <b>1707.927577</b> | 854.467427            | 1690.901028 | 845.954152             | 1689.917012          | 845.462144             | <b>L</b> | 288.203016         | 144.605146            | 271.176467  | 136.091871             |                      |                        |
| 19 |                    |                       |             |                        |                      |                        | <b>R</b> | 175.118952         | 88.063114             | 158.092403  | 79.549839              |                      |                        |

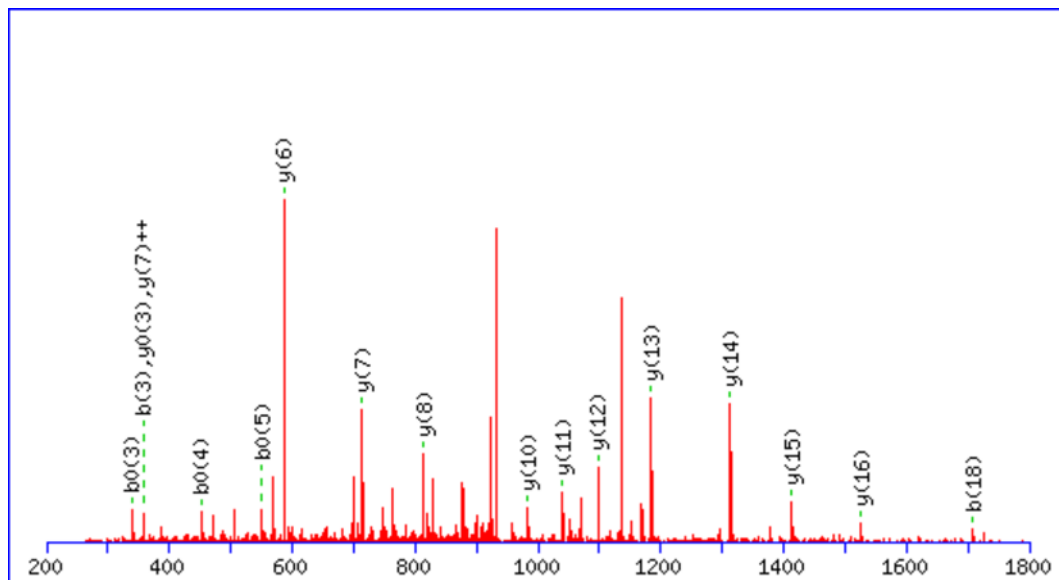

## Peptide View

MS/MS Fragmentation of **ALVQIVK**

Found in **IPI00216569**, Tax\_Id=9606 Gene\_Symbol=CST7 Cystatin-F precursor

**Experiment:** 32 - OPA-2 **Fraction:** OPA-2

Match to Query 770: 770.489848 from(386.252200,2+)

Title: OECHL100312\_11.11549.11549.2.dta

Data file \\BOROMIR\Masse\Data LTQ-Orbitrap\Chrystelle Lacroix\Etude clinique sJPU\OECHL100312\_11.raw

**Monoisotopic mass of neutral peptide Mr(calc):** 770.490173 **Fixed modifications:** Carbamidomethyl (C) (apply to specified residues or termini only) **Variable**

**modifications:** Q4 : Deamidated (NQ) **Ions Score:** 53 **Expect:** 0.00021 **Matches :** 12/42 fragment ions using 19 most intense peaks ([help](#))

| # | b                 | b <sup>++</sup> | b <sup>*</sup> | b <sup>*++</sup> | Seq. | y                 | y <sup>++</sup>   | y <sup>*</sup> | y <sup>*++</sup> | # |
|---|-------------------|-----------------|----------------|------------------|------|-------------------|-------------------|----------------|------------------|---|
| 1 | 72.044390         | 36.525833       |                |                  | A    |                   |                   |                |                  | 7 |
| 2 | <b>185.128454</b> | 93.067865       |                |                  | L    | <b>700.460354</b> | <b>350.733815</b> | 683.433805     | 342.220541       | 6 |
| 3 | <b>284.196868</b> | 142.602072      |                |                  | V    | <b>587.376290</b> | <b>294.191783</b> | 570.349741     | 285.678509       | 5 |
| 4 | 413.239462        | 207.123369      | 396.212913     | 198.610095       | Q    | <b>488.307876</b> | 244.657576        | 471.281327     | 236.144301       | 4 |
| 5 | <b>526.323526</b> | 263.665401      | 509.296977     | 255.152127       | I    | <b>359.265282</b> | 180.136279        | 342.238733     | 171.623004       | 3 |

|   |                   |            |            |            |   |                   |            |            |            |   |
|---|-------------------|------------|------------|------------|---|-------------------|------------|------------|------------|---|
| 6 | <b>625.391940</b> | 313.199608 | 608.365391 | 304.686333 | V | <b>246.181218</b> | 123.594247 | 229.154669 | 115.080972 | 2 |
| 7 |                   |            |            |            | K | <b>147.112804</b> | 74.060040  | 130.086255 | 65.546765  | 1 |

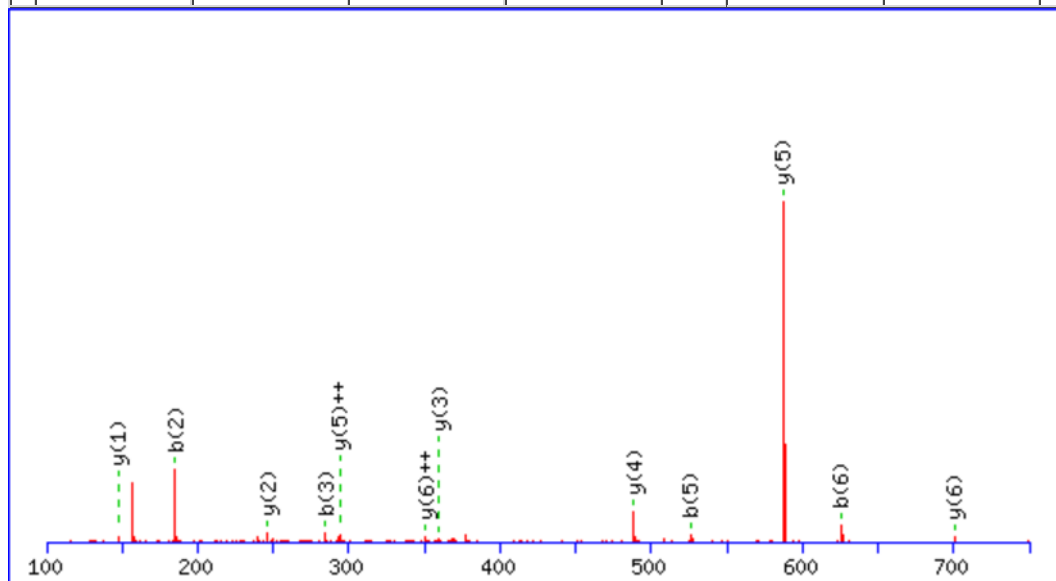

## Peptide View

MS/MS Fragmentation of **YCCAAADAR**

Found in **IPI00455600**, Tax\_Id=9606 Gene\_Symbol=SHISA3 Protein shisa-3 homolog

**Experiment:** 32 - OPA-2 **Fraction:** OPA-2

Match to Query 3663: 1056.411048 from(529.212800,2+)

Title: OECHL100312\_11.2993.2993.2.dta

Data file \\BOROMIR\Masse\Data LTQ-Orbitrap\Chrystelle Lacroix\Etude clinique sJPU\OECHL100312\_11.raw

**Monoisotopic mass of neutral peptide Mr(calc):** 1056.411682 **Fixed modifications:** Carbamidomethyl (C) (apply to specified residues or termini only) **Ions**

**Score:** 52 **Expect:** 3.9e-005 **Matches :** 15/64 fragment ions using 36 most intense peaks ([help](#))

| # | b                 | b <sup>++</sup> | b <sup>0</sup> | b <sup>0++</sup> | Seq. | y                 | y <sup>++</sup>   | y <sup>*</sup> | y <sup>*++</sup> | y <sup>0</sup> | y <sup>0++</sup> | # |
|---|-------------------|-----------------|----------------|------------------|------|-------------------|-------------------|----------------|------------------|----------------|------------------|---|
| 1 | 164.070605        | 82.538940       |                |                  | Y    |                   |                   |                |                  |                |                  | 9 |
| 2 | <b>324.101254</b> | 162.554265      |                |                  | C    | <b>894.355649</b> | <b>447.681462</b> | 877.329100     | 439.168188       | 876.345084     | 438.676180       | 8 |
| 3 | 484.131903        | 242.569590      |                |                  | C    | <b>734.325000</b> | 367.666138        | 717.298451     | 359.152863       | 716.314435     | 358.660855       | 7 |

|   |                   |            |            |            |   |                   |                   |            |            |            |            |   |
|---|-------------------|------------|------------|------------|---|-------------------|-------------------|------------|------------|------------|------------|---|
| 4 | <b>555.169017</b> | 278.088147 |            |            | A | <b>574.294351</b> | 287.650813        | 557.267802 | 279.137539 | 556.283786 | 278.645531 | 6 |
| 5 | <b>626.206131</b> | 313.606704 |            |            | A | <b>503.257237</b> | 252.132256        | 486.230688 | 243.618982 | 485.246672 | 243.126974 | 5 |
| 6 | 697.243245        | 349.125261 |            |            | A | <b>432.220123</b> | 216.613699        | 415.193574 | 208.100425 | 414.209558 | 207.608417 | 4 |
| 7 | <b>812.270188</b> | 406.638732 | 794.259623 | 397.633449 | D | <b>361.183009</b> | <b>181.095142</b> | 344.156460 | 172.581868 | 343.172444 | 172.089860 | 3 |
| 8 | <b>883.307302</b> | 442.157289 | 865.296737 | 433.152006 | A | <b>246.156066</b> | 123.581671        | 229.129517 | 115.068396 |            |            | 2 |
| 9 |                   |            |            |            | R | <b>175.118952</b> | 88.063114         | 158.092403 | 79.549839  |            |            | 1 |

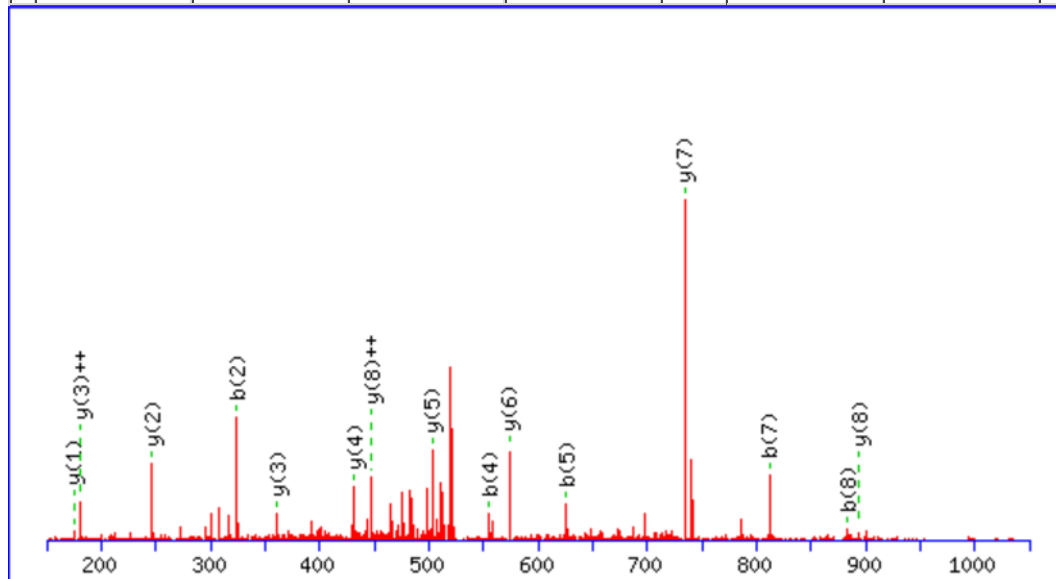

## Peptide View

MS/MS Fragmentation of **SFCDLTDEWR**

Found in **IPI00010193**, Tax\_Id=9606 Gene\_Symbol=IFNAR2 Isoform 1 of Interferon-alpha/beta receptor beta chain

**Experiment:** 32 - OPA-2 **Fraction:** OPA-2

Match to Query 7573: 1327.550848 from(664.782700,2+)

Title: OECHL100312\_11.16479.16479.2.dta

Data file \\BOROMIR\Masse\Data LTQ-Orbitrap\Chrystelle Lacroix\Etude clinique sJPU\OECHL100312\_11.raw

**Monoisotopic mass of neutral peptide Mr(calc):** 1327.550308 **Fixed modifications:** Carbamidomethyl (C) (apply to specified residues or termini only) **Ions**

**Score:** 51 **Expect:** 0.00019 **Matches :** 11/86 fragment ions using 12 most intense peaks ([help](#))

| #  | b           | b <sup>++</sup> | b <sup>0</sup> | b <sup>0++</sup> | Seq. | y           | y <sup>++</sup> | y*          | y <sup>*++</sup> | y <sup>0</sup> | y <sup>0++</sup> | #  |
|----|-------------|-----------------|----------------|------------------|------|-------------|-----------------|-------------|------------------|----------------|------------------|----|
| 1  | 88.039304   | 44.523290       | 70.028739      | 35.518008        | S    |             |                 |             |                  |                |                  | 10 |
| 2  | 235.107718  | 118.057497      | 217.097153     | 109.052214       | F    | 1241.525550 | 621.266413      | 1224.499001 | 612.753138       | 1223.514985    | 612.261130       | 9  |
| 3  | 395.138367  | 198.072821      | 377.127802     | 189.067539       | C    | 1094.457136 | 547.732206      | 1077.430587 | 539.218932       | 1076.446571    | 538.726924       | 8  |
| 4  | 510.165310  | 255.586293      | 492.154745     | 246.581010       | D    | 934.426487  | 467.716882      | 917.399938  | 459.203607       | 916.415922     | 458.711599       | 7  |
| 5  | 623.249374  | 312.128325      | 605.238809     | 303.123043       | L    | 819.399544  | 410.203410      | 802.372995  | 401.690135       | 801.388979     | 401.198127       | 6  |
| 6  | 724.297053  | 362.652165      | 706.286488     | 353.646882       | T    | 706.315480  | 353.661378      | 689.288931  | 345.148103       | 688.304915     | 344.656095       | 5  |
| 7  | 839.323996  | 420.165636      | 821.313431     | 411.160353       | D    | 605.267801  | 303.137539      | 588.241252  | 294.624264       | 587.257236     | 294.132256       | 4  |
| 8  | 968.366589  | 484.686933      | 950.356024     | 475.681650       | E    | 490.240858  | 245.624067      | 473.214309  | 237.110792       | 472.230293     | 236.618784       | 3  |
| 9  | 1154.445902 | 577.726589      | 1136.435337    | 568.721306       | W    | 361.198265  | 181.102770      | 344.171716  | 172.589496       |                |                  | 2  |
| 10 |             |                 |                |                  | R    | 175.118952  | 88.063114       | 158.092403  | 79.549839        |                |                  | 1  |

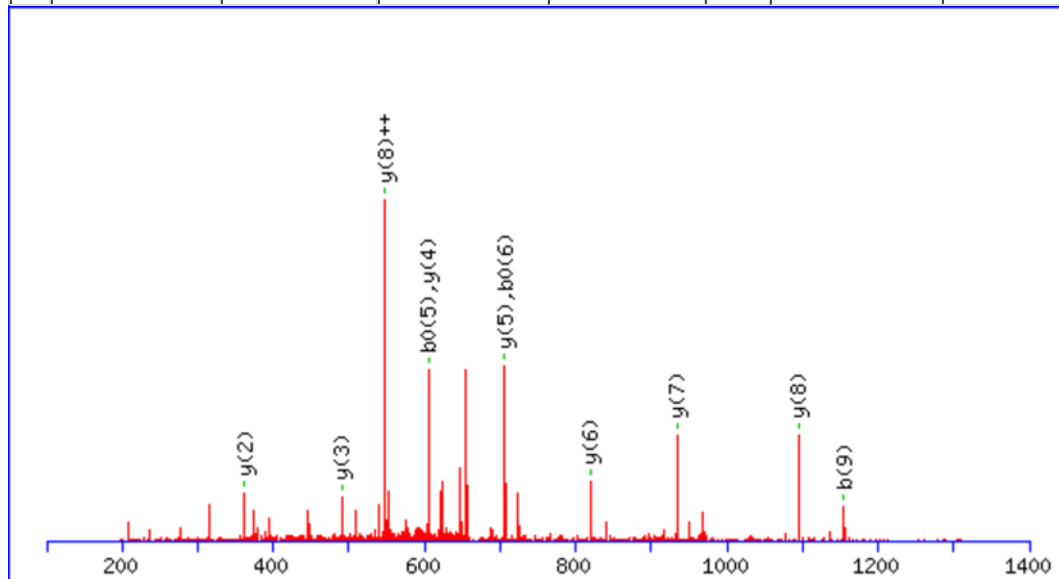

## Peptide View

MS/MS Fragmentation of **VAAGAFQGLR**

Found in **IPI00022417**, Tax\_Id=9606 Gene\_Symbol=LRG1 Leucine-rich alpha-2-glycoprotein

**Experiment:** 17 - NOPA2 **Fraction:** NOPA2

Match to Query 2662: 988.546648 from(495.280600,2+)

Title: OECHL100312\_07.10941.10941.2.dta

Data file \\BOROMIR\Masse\Data LTQ-Orbitrap\Chrystelle Lacroix\Etude clinique sJPU\OECHL100312\_07.raw

**Monoisotopic mass of neutral peptide Mr(calc):** 988.545410 **Fixed modifications:** Carbamidomethyl (C) (apply to specified residues or termini only) **Ions Score:****70 Expect:** 5.6e-006 **Matches :** 20/60 fragment ions using 36 most intense peaks ([help](#))

| #  | b                 | b <sup>++</sup> | b*                | b <sup>*++</sup> | Seq. | y                 | y <sup>++</sup>   | y*                | y <sup>*++</sup>  | #  |
|----|-------------------|-----------------|-------------------|------------------|------|-------------------|-------------------|-------------------|-------------------|----|
| 1  | 100.075690        | 50.541483       |                   |                  | V    |                   |                   |                   |                   | 10 |
| 2  | <b>171.112804</b> | 86.060040       |                   |                  | A    | <b>890.484278</b> | <b>445.745777</b> | 873.457729        | 437.232503        | 9  |
| 3  | <b>242.149918</b> | 121.578597      |                   |                  | A    | <b>819.447164</b> | <b>410.227220</b> | 802.420615        | 401.713946        | 8  |
| 4  | <b>299.171382</b> | 150.089329      |                   |                  | G    | <b>748.410050</b> | 374.708663        | 731.383501        | 366.195389        | 7  |
| 5  | <b>370.208496</b> | 185.607886      |                   |                  | A    | <b>691.388586</b> | 346.197931        | 674.362037        | 337.684657        | 6  |
| 6  | <b>517.276910</b> | 259.142093      |                   |                  | F    | <b>620.351472</b> | 310.679374        | 603.324923        | 302.166100        | 5  |
| 7  | <b>645.335488</b> | 323.171382      | <b>628.308939</b> | 314.658108       | Q    | <b>473.283058</b> | 237.145167        | 456.256509        | <b>228.631893</b> | 4  |
| 8  | 702.356952        | 351.682114      | 685.330403        | 343.168840       | G    | <b>345.224480</b> | 173.115878        | 328.197931        | 164.602604        | 3  |
| 9  | 815.441016        | 408.224146      | 798.414467        | 399.710872       | L    | <b>288.203016</b> | 144.605146        | <b>271.176467</b> | 136.091872        | 2  |
| 10 |                   |                 |                   |                  | R    | <b>175.118952</b> | 88.063114         | 158.092403        | 79.549840         | 1  |

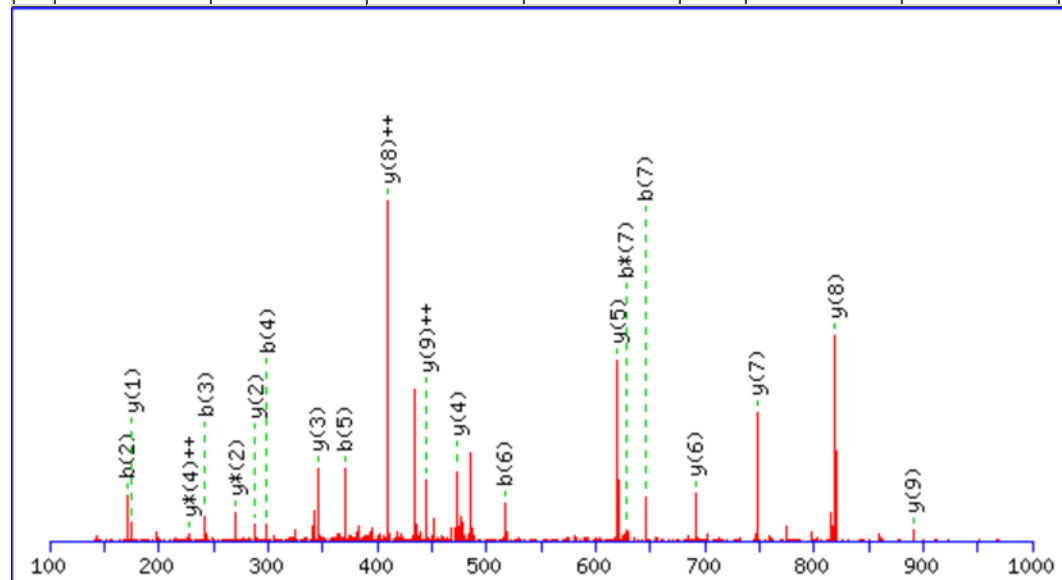

## Peptide View

MS/MS Fragmentation of **YSGSEGSTQTLTKGELK**

Found in **IPI00017526**, Tax\_Id=9606 Gene\_Symbol=S100P Protein S100-P

**Experiment:** 17 - NOPA2 **Fraction:** NOPA2

Match to Query 12338: 1784.880048 from(893.447300,2+)

Title: OECHL100312\_07.7592.7592.2.dta

Data file \\BOROMIR\Masse\Data LTQ-Orbitrap\Chrystelle Lacroix\Etude clinique sJPU\OECHL100312\_07.raw

**Monoisotopic mass of neutral peptide Mr(calc):** 1784.879211 **Fixed modifications:** Carbamidomethyl (C) (apply to specified residues or termini only) **Ions**

**Score:** 66 **Expect:** 3.5e-005 **Matches :** 11/170 fragment ions using 15 most intense peaks ([help](#))

| #  | b           | b <sup>++</sup> | b*          | b <sup>*++</sup> | b <sup>0</sup> | b <sup>0++</sup> | Seq. | y           | y <sup>++</sup> | y*          | y <sup>*++</sup> | y <sup>0</sup> | y <sup>0++</sup> |
|----|-------------|-----------------|-------------|------------------|----------------|------------------|------|-------------|-----------------|-------------|------------------|----------------|------------------|
| 1  | 164.070605  | 82.538940       |             |                  |                |                  | Y    |             |                 |             |                  |                |                  |
| 2  | 251.102633  | 126.054954      |             |                  | 233.092068     | 117.049672       | S    | 1622.823172 | 811.915224      | 1605.796623 | 803.401950       | 1604.812607    | 802.9099         |
| 3  | 308.124097  | 154.565687      |             |                  | 290.113532     | 145.560404       | G    | 1535.791144 | 768.399210      | 1518.764595 | 759.885936       | 1517.780579    | 759.3939         |
| 4  | 395.156125  | 198.081701      |             |                  | 377.145560     | 189.076418       | S    | 1478.769680 | 739.888478      | 1461.743131 | 731.375204       | 1460.759115    | 730.8831         |
| 5  | 524.198718  | 262.602997      |             |                  | 506.188153     | 253.597715       | E    | 1391.737652 | 696.372464      | 1374.711103 | 687.859190       | 1373.727087    | 687.3671         |
| 6  | 581.220182  | 291.113729      |             |                  | 563.209617     | 282.108447       | G    | 1262.695059 | 631.851167      | 1245.668510 | 623.337893       | 1244.684494    | 622.8458         |
| 7  | 668.252210  | 334.629743      |             |                  | 650.241645     | 325.624461       | S    | 1205.673595 | 603.340436      | 1188.647046 | 594.827161       | 1187.663030    | 594.3351         |
| 8  | 769.299889  | 385.153583      |             |                  | 751.289324     | 376.148300       | T    | 1118.641567 | 559.824421      | 1101.615018 | 551.311147       | 1100.631002    | 550.8191         |
| 9  | 897.358467  | 449.182872      | 880.331918  | 440.669597       | 879.347902     | 440.177589       | Q    | 1017.593888 | 509.300582      | 1000.567339 | 500.787307       | 999.583323     | 500.2952         |
| 10 | 998.406146  | 499.706711      | 981.379597  | 491.193437       | 980.395581     | 490.701429       | T    | 889.535310  | 445.271293      | 872.508761  | 436.758018       | 871.524745     | 436.2660         |
| 11 | 1111.490210 | 556.248743      | 1094.463661 | 547.735469       | 1093.479645    | 547.243461       | L    | 788.487631  | 394.747453      | 771.461082  | 386.234179       | 770.477066     | 385.7421         |
| 12 | 1212.537889 | 606.772583      | 1195.511340 | 598.259308       | 1194.527324    | 597.767300       | T    | 675.403567  | 338.205421      | 658.377018  | 329.692147       | 657.393002     | 329.2001         |
| 13 | 1340.632852 | 670.820064      | 1323.606303 | 662.306790       | 1322.622287    | 661.814782       | K    | 574.355888  | 287.681582      | 557.329339  | 279.168307       | 556.345323     | 278.6762         |
| 14 | 1397.654316 | 699.330796      | 1380.627767 | 690.817522       | 1379.643751    | 690.325514       | G    | 446.260925  | 223.634100      | 429.234376  | 215.120826       | 428.250360     | 214.6288         |
| 15 | 1526.696909 | 763.852093      | 1509.670360 | 755.338818       | 1508.686344    | 754.846810       | E    | 389.239461  | 195.123368      | 372.212912  | 186.610094       | 371.228896     | 186.1180         |
| 16 | 1639.780973 | 820.394124      | 1622.754424 | 811.880850       | 1621.770408    | 811.388842       | L    | 260.196868  | 130.602072      | 243.170319  | 122.088797       |                |                  |
| 17 |             |                 |             |                  |                |                  | K    | 147.112804  | 74.060040       | 130.086255  | 65.546765        |                |                  |

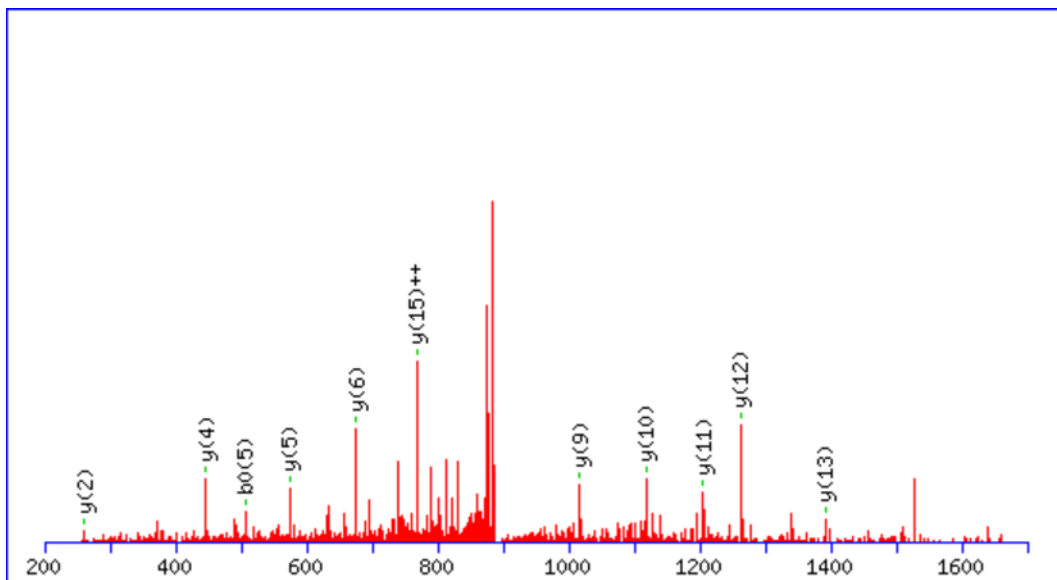

## Peptide View

MS/MS Fragmentation of **GQLPISVTCIADEIGAR**

Found in **IPI00240345**, Tax\_Id=9606 Gene\_Symbol=CLEC14A C-type lectin domain family 14 member A

**Experiment:** 17 - NOPA2 **Fraction:** NOPA2

Match to Query 12441: 1798.927448 from(900.471000,2+)

Title: OECHL100312\_07.19475.19475.2.dta

Data file \\BOROMIR\Masse\Data LTQ-Orbitrap\Chrystelle Lacroix\Etude clinique sJPU\OECHL100312\_07.raw

**Monoisotopic mass of neutral peptide Mr(calc):** 1798.924728 **Fixed modifications:** Carbamidomethyl (C) (apply to specified residues or termini only) **Ions**

**Score:** 101 **Expect:** 1e-008 **Matches :** 25/172 fragment ions using 42 most intense peaks ([help](#))

| # | b                 | b <sup>++</sup> | b*                | b <sup>*++</sup> | b <sup>0</sup> | b <sup>0++</sup> | Seq. | y                  | y <sup>++</sup>   | y*          | y <sup>*++</sup> | y <sup>0</sup> | y <sup>0++</sup> |
|---|-------------------|-----------------|-------------------|------------------|----------------|------------------|------|--------------------|-------------------|-------------|------------------|----------------|------------------|
| 1 | 58.028740         | 29.518008       |                   |                  |                |                  | G    |                    |                   |             |                  |                |                  |
| 2 | 186.087318        | 93.547297       | 169.060769        | 85.034023        |                |                  | Q    | 1742.910548        | 871.958912        | 1725.883999 | 863.445638       | 1724.899983    | 862.9536         |
| 3 | <b>299.171382</b> | 150.089329      | 282.144833        | 141.576055       |                |                  | L    | <b>1614.851970</b> | <b>807.929623</b> | 1597.825421 | 799.416349       | 1596.841405    | 798.9243         |
| 4 | 396.224146        | 198.615711      | 379.197597        | 190.102436       |                |                  | P    | <b>1501.767906</b> | <b>751.387591</b> | 1484.741357 | 742.874317       | 1483.757341    | 742.3823         |
| 5 | <b>509.308210</b> | 255.157743      | <b>492.281661</b> | 246.644468       |                |                  | I    | <b>1404.715142</b> | 702.861209        | 1387.688593 | 694.347935       | 1386.704577    | 693.8559         |



|    |                    |            |             |            |                    |            |   |                    |            |             |            |             |          |
|----|--------------------|------------|-------------|------------|--------------------|------------|---|--------------------|------------|-------------|------------|-------------|----------|
| 6  | <b>596.340238</b>  | 298.673757 | 579.313689  | 290.160483 | 578.329673         | 289.668475 | S | <b>1291.631078</b> | 646.319177 | 1274.604529 | 637.805903 | 1273.620513 | 637.3138 |
| 7  | 695.408652         | 348.207964 | 678.382103  | 339.694689 | 677.398087         | 339.202681 | V | <b>1204.599050</b> | 602.803163 | 1187.572501 | 594.289889 | 1186.588485 | 593.7978 |
| 8  | 796.456331         | 398.731804 | 779.429782  | 390.218529 | 778.445766         | 389.726521 | T | <b>1105.530636</b> | 553.268956 | 1088.504087 | 544.755682 | 1087.520071 | 544.2636 |
| 9  | <b>956.486980</b>  | 478.747128 | 939.460431  | 470.233854 | 938.476415         | 469.741846 | C | <b>1004.482957</b> | 502.745117 | 987.456408  | 494.231842 | 986.472392  | 493.7398 |
| 10 | <b>1069.571044</b> | 535.289160 | 1052.544495 | 526.775886 | 1051.560479        | 526.283878 | I | <b>844.452308</b>  | 422.729792 | 827.425759  | 414.216518 | 826.441743  | 413.7245 |
| 11 | 1140.608158        | 570.807717 | 1123.581609 | 562.294443 | 1122.597593        | 561.802435 | A | <b>731.368244</b>  | 366.187760 | 714.341695  | 357.674486 | 713.357679  | 357.1824 |
| 12 | <b>1255.635101</b> | 628.321189 | 1238.608552 | 619.807914 | 1237.624536        | 619.315906 | D | <b>660.331130</b>  | 330.669203 | 643.304581  | 322.155929 | 642.320565  | 321.6639 |
| 13 | <b>1384.677694</b> | 692.842485 | 1367.651145 | 684.329211 | <b>1366.667129</b> | 683.837203 | E | <b>545.304187</b>  | 273.155732 | 528.277638  | 264.642457 | 527.293622  | 264.1504 |
| 14 | 1497.761758        | 749.384517 | 1480.735209 | 740.871243 | 1479.751193        | 740.379235 | I | <b>416.261594</b>  | 208.634435 | 399.235045  | 200.121160 |             |          |
| 15 | 1554.783222        | 777.895249 | 1537.756673 | 769.381975 | 1536.772657        | 768.889967 | G | <b>303.177530</b>  | 152.092403 | 286.150981  | 143.579128 |             |          |
| 16 | <b>1625.820336</b> | 813.413806 | 1608.793787 | 804.900532 | 1607.809771        | 804.408524 | A | 246.156066         | 123.581671 | 229.129517  | 115.068396 |             |          |
| 17 |                    |            |             |            |                    |            | R | 175.118952         | 88.063114  | 158.092403  | 79.549839  |             |          |

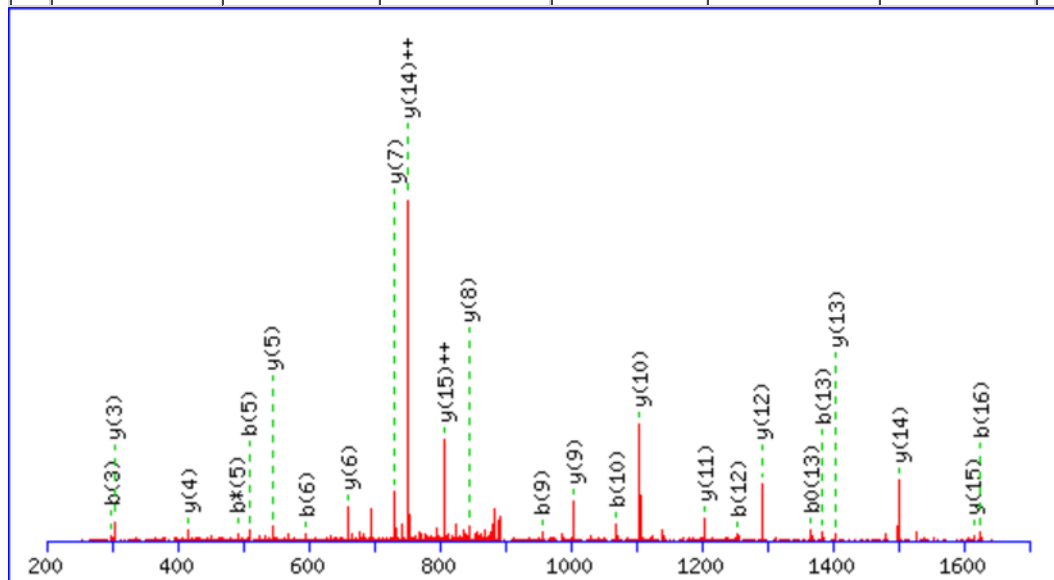

## Peptide View

MS/MS Fragmentation of **AHGQESAI FNEVAPGYFSR**

Found in **IPI00170635**, Tax\_Id=9606 Gene\_Symbol=SECTM1 Secreted and transmembrane protein 1

**Experiment:** 17 - NOPA2 **Fraction:** NOPA2

Match to Query 14081: 2078.983448 from(1040.499000,2+)

Title: OECHL100312\_07.17030.17030.2.dta

Data file \\BOROMIR\Masse\Data LTQ-Orbitrap\Chrystelle Lacroix\Etude clinique sJPU\OECHL100312\_07.raw

**Monoisotopic mass of neutral peptide Mr(calc):** 2078.980988**Fixed modifications:** Carbamidomethyl (C) (apply to specified residues or termini only)**Ions**

**Score:** 92 **Expect:** 1.1e-007**Matches :** 46/200 fragment ions using 83 most intense peaks ([help](#))

| #  | b           | b <sup>++</sup> | b*          | b* <sup>++</sup> | b <sup>0</sup> | b <sup>0++</sup> | Seq. | y           | y <sup>++</sup> | y*          | y* <sup>++</sup> | y <sup>0</sup> | y <sup>0++</sup> |
|----|-------------|-----------------|-------------|------------------|----------------|------------------|------|-------------|-----------------|-------------|------------------|----------------|------------------|
| 1  | 72.044390   | 36.525833       |             |                  |                |                  | A    |             |                 |             |                  |                |                  |
| 2  | 209.103302  | 105.055289      |             |                  |                |                  | H    | 2008.951166 | 1004.979221     | 1991.924617 | 996.465947       | 1990.940601    | 995.973          |
| 3  | 266.124766  | 133.566021      |             |                  |                |                  | G    | 1871.892254 | 936.449765      | 1854.865705 | 927.936491       | 1853.881689    | 927.444          |
| 4  | 394.183344  | 197.595310      | 377.156795  | 189.082035       |                |                  | Q    | 1814.870790 | 907.939033      | 1797.844241 | 899.425759       | 1796.860225    | 898.933          |
| 5  | 523.225937  | 262.116607      | 506.199388  | 253.603332       | 505.215372     | 253.111324       | E    | 1686.812212 | 843.909744      | 1669.785663 | 835.396470       | 1668.801647    | 834.904          |
| 6  | 610.257965  | 305.632621      | 593.231416  | 297.119346       | 592.247400     | 296.627338       | S    | 1557.769619 | 779.388448      | 1540.743070 | 770.875173       | 1539.759054    | 770.383          |
| 7  | 681.295079  | 341.151178      | 664.268530  | 332.637903       | 663.284514     | 332.145895       | A    | 1470.737591 | 735.872434      | 1453.711042 | 727.359159       | 1452.727026    | 726.867          |
| 8  | 794.379143  | 397.693210      | 777.352594  | 389.179935       | 776.368578     | 388.687927       | I    | 1399.700477 | 700.353877      | 1382.673928 | 691.840602       | 1381.689912    | 691.348          |
| 9  | 941.447557  | 471.227417      | 924.421008  | 462.714142       | 923.436992     | 462.222134       | F    | 1286.616413 | 643.811845      | 1269.589864 | 635.298570       | 1268.605848    | 634.806          |
| 10 | 1055.490484 | 528.248880      | 1038.463935 | 519.735606       | 1037.479919    | 519.243597       | N    | 1139.547999 | 570.277638      | 1122.521450 | 561.764363       | 1121.537434    | 561.272          |
| 11 | 1184.533077 | 592.770176      | 1167.506528 | 584.256902       | 1166.522512    | 583.764894       | E    | 1025.505072 | 513.256174      | 1008.478523 | 504.742900       | 1007.494507    | 504.250          |
| 12 | 1283.601491 | 642.304383      | 1266.574942 | 633.791109       | 1265.590926    | 633.299101       | V    | 896.462479  | 448.734878      | 879.435930  | 440.221603       | 878.451914     | 439.729          |
| 13 | 1354.638605 | 677.822940      | 1337.612056 | 669.309666       | 1336.628040    | 668.817658       | A    | 797.394065  | 399.200671      | 780.367516  | 390.687396       | 779.383500     | 390.195          |
| 14 | 1451.691369 | 726.349322      | 1434.664820 | 717.836048       | 1433.680804    | 717.344040       | P    | 726.356951  | 363.682114      | 709.330402  | 355.168839       | 708.346386     | 354.676          |
| 15 | 1508.712833 | 754.860054      | 1491.686284 | 746.346780       | 1490.702268    | 745.854772       | G    | 629.304187  | 315.155732      | 612.277638  | 306.642457       | 611.293622     | 306.150          |
| 16 | 1671.776162 | 836.391719      | 1654.749613 | 827.878445       | 1653.765597    | 827.386436       | Y    | 572.282723  | 286.645000      | 555.256174  | 278.131725       | 554.272158     | 277.639          |
| 17 | 1818.844576 | 909.925926      | 1801.818027 | 901.412652       | 1800.834011    | 900.920643       | F    | 409.219394  | 205.113335      | 392.192845  | 196.600061       | 391.208829     | 196.108          |
| 18 | 1905.876604 | 953.441940      | 1888.850055 | 944.928666       | 1887.866039    | 944.436658       | S    | 262.150980  | 131.579128      | 245.124431  | 123.065854       | 244.140415     | 122.573          |
| 19 |             |                 |             |                  |                |                  | R    | 175.118952  | 88.063114       | 158.092403  | 79.549840        |                |                  |

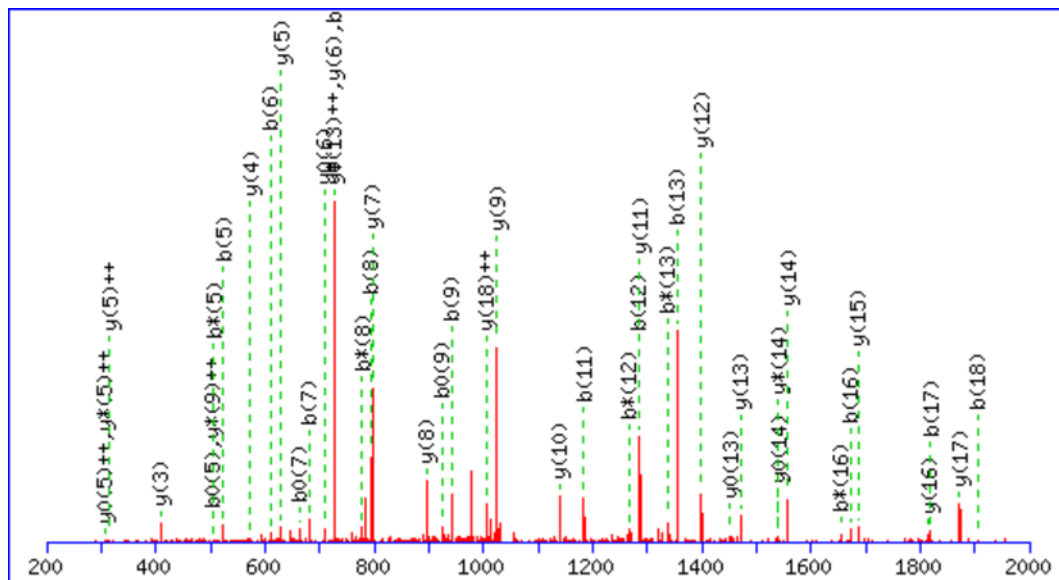

## Peptide View

MS/MS Fragmentation of **DAEEDDSLANSDDLKELLETGDNRR**

Found in **IPI0000828**, Tax\_Id=9606 Gene\_Symbol=PENK Proenkephalin-A

**Experiment:** 17 - NOPA2 **Fraction:** NOPA2

Match to Query 17191: 3033.404172 from(1012.142000,3+)

Title: OECHL100312\_07.19854.19854.3.dta

Data file \\BOROMIR\Masse\Data LTQ-Orbitrap\Chrystelle Lacroix\Etude clinique sJPU\OECHL100312\_07.raw

**Monoisotopic mass of neutral peptide Mr(calc):** 3033.401001 **Fixed modifications:** Carbamidomethyl (C) (apply to specified residues or termini only) **Ions**

**Score:** 85 **Expect:** 6.5e-007 **Matches :** 64/292 fragment ions using 131 most intense peaks ([help](#))

| # | b                 | b <sup>++</sup> | b <sup>*</sup> | b <sup>*++</sup> | b <sup>0</sup>    | b <sup>0++</sup> | Seq. | y           | y <sup>++</sup>    | y <sup>*</sup> | y <sup>*++</sup>   | y <sup>0</sup> |           |
|---|-------------------|-----------------|----------------|------------------|-------------------|------------------|------|-------------|--------------------|----------------|--------------------|----------------|-----------|
| 1 | 116.034219        | 58.520748       |                |                  | 98.023654         | 49.515465        | D    |             |                    |                |                    |                |           |
| 2 | 187.071333        | 94.039304       |                |                  | 169.060768        | 85.034022        | A    | 2919.381392 | 1460.194334        | 2902.354843    | 1451.681059        | 2901.370827    | 14:       |
| 3 | <b>316.113926</b> | 158.560601      |                |                  | 298.103361        | 149.555319       | E    | 2848.344278 | 1424.675777        | 2831.317729    | <b>1416.162502</b> | 2830.333713    | <b>14</b> |
| 4 | <b>445.156519</b> | 223.081898      |                |                  | 427.145954        | 214.076615       | E    | 2719.301685 | <b>1360.154480</b> | 2702.275136    | <b>1351.641206</b> | 2701.291120    | 13:       |
| 5 | <b>560.183462</b> | 280.595369      |                |                  | <b>542.172897</b> | 271.590087       | D    | 2590.259092 | <b>1295.633184</b> | 2573.232543    | <b>1287.119909</b> | 2572.248527    | 12:       |

|    |             |             |             |             |             |             |   |             |             |             |             |             |    |
|----|-------------|-------------|-------------|-------------|-------------|-------------|---|-------------|-------------|-------------|-------------|-------------|----|
| 6  | 675.210405  | 338.108841  |             |             | 657.199840  | 329.103558  | D | 2475.232149 | 1238.119712 | 2458.205600 | 1229.606438 | 2457.221584 | 12 |
| 7  | 762.242433  | 381.624855  |             |             | 744.231868  | 372.619572  | S | 2360.205206 | 1180.606241 | 2343.178657 | 1172.092966 | 2342.194641 | 11 |
| 8  | 875.326497  | 438.166887  |             |             | 857.315932  | 429.161604  | L | 2273.173178 | 1137.090227 | 2256.146629 | 1128.576952 | 2255.162613 | 11 |
| 9  | 946.363611  | 473.685444  |             |             | 928.353046  | 464.680161  | A | 2160.089114 | 1080.548195 | 2143.062565 | 1072.034920 | 2142.078549 | 10 |
| 10 | 1060.406538 | 530.706907  | 1043.379989 | 522.193633  | 1042.395973 | 521.701624  | N | 2089.052000 | 1045.029638 | 2072.025451 | 1036.516363 | 2071.041435 | 10 |
| 11 | 1147.438566 | 574.222921  | 1130.412017 | 565.709647  | 1129.428001 | 565.217639  | S | 1975.009073 | 988.008174  | 1957.982524 | 979.494900  | 1956.998508 | 9  |
| 12 | 1234.470594 | 617.738935  | 1217.444045 | 609.225661  | 1216.460029 | 608.733653  | S | 1887.977045 | 944.492160  | 1870.950496 | 935.978886  | 1869.966480 | 9  |
| 13 | 1349.497537 | 675.252407  | 1332.470988 | 666.739132  | 1331.486972 | 666.247124  | D | 1800.945017 | 900.976146  | 1783.918468 | 892.462872  | 1782.934452 | 8  |
| 14 | 1462.581601 | 731.794439  | 1445.555052 | 723.281164  | 1444.571036 | 722.789156  | L | 1685.918074 | 843.462675  | 1668.891525 | 834.949400  | 1667.907509 | 8  |
| 15 | 1575.665665 | 788.336471  | 1558.639116 | 779.823196  | 1557.655100 | 779.331188  | L | 1572.834010 | 786.920643  | 1555.807461 | 778.407368  | 1554.823445 | 7  |
| 16 | 1703.760628 | 852.383952  | 1686.734079 | 843.870678  | 1685.750063 | 843.378670  | K | 1459.749946 | 730.378611  | 1442.723397 | 721.865336  | 1441.739381 | 7  |
| 17 | 1832.803221 | 916.905248  | 1815.776672 | 908.391974  | 1814.792656 | 907.899966  | E | 1331.654983 | 666.331129  | 1314.628434 | 657.817855  | 1313.644418 | 6  |
| 18 | 1945.887285 | 973.447280  | 1928.860736 | 964.934006  | 1927.876720 | 964.441998  | L | 1202.612390 | 601.809833  | 1185.585841 | 593.296558  | 1184.601825 | 5  |
| 19 | 2058.971349 | 1029.989312 | 2041.944800 | 1021.476038 | 2040.960784 | 1020.984030 | L | 1089.528326 | 545.267801  | 1072.501777 | 536.754526  | 1071.517761 | 5  |
| 20 | 2188.013942 | 1094.510609 | 2170.987393 | 1085.997334 | 2170.003377 | 1085.505326 | E | 976.444262  | 488.725769  | 959.417713  | 480.212494  | 958.433697  | 4  |
| 21 | 2289.061621 | 1145.034448 | 2272.035072 | 1136.521174 | 2271.051056 | 1136.029166 | T | 847.401669  | 424.204472  | 830.375120  | 415.691198  | 829.391104  | 4  |
| 22 | 2346.083085 | 1173.545180 | 2329.056536 | 1165.031906 | 2328.072520 | 1164.539898 | G | 746.353990  | 373.680633  | 729.327441  | 365.167358  | 728.343425  | 3  |
| 23 | 2461.110028 | 1231.058652 | 2444.083479 | 1222.545377 | 2443.099463 | 1222.053369 | D | 689.332526  | 345.169901  | 672.305977  | 336.656626  | 671.321961  | 3  |
| 24 | 2575.152955 | 1288.080115 | 2558.126406 | 1279.566841 | 2557.142390 | 1279.074833 | N | 574.305583  | 287.656430  | 557.279034  | 279.143155  | 556.295018  | 2  |
| 25 | 2731.254066 | 1366.130671 | 2714.227517 | 1357.617396 | 2713.243501 | 1357.125388 | R | 460.262656  | 230.634966  | 443.236107  | 222.121692  | 442.252091  | 2  |
| 26 | 2860.296659 | 1430.651967 | 2843.270110 | 1422.138693 | 2842.286094 | 1421.646685 | E | 304.161545  | 152.584411  | 287.134996  | 144.071136  | 286.150980  | 1  |
| 27 |             |             |             |             |             |             | R | 175.118952  | 88.063114   | 158.092403  | 79.549839   |             |    |

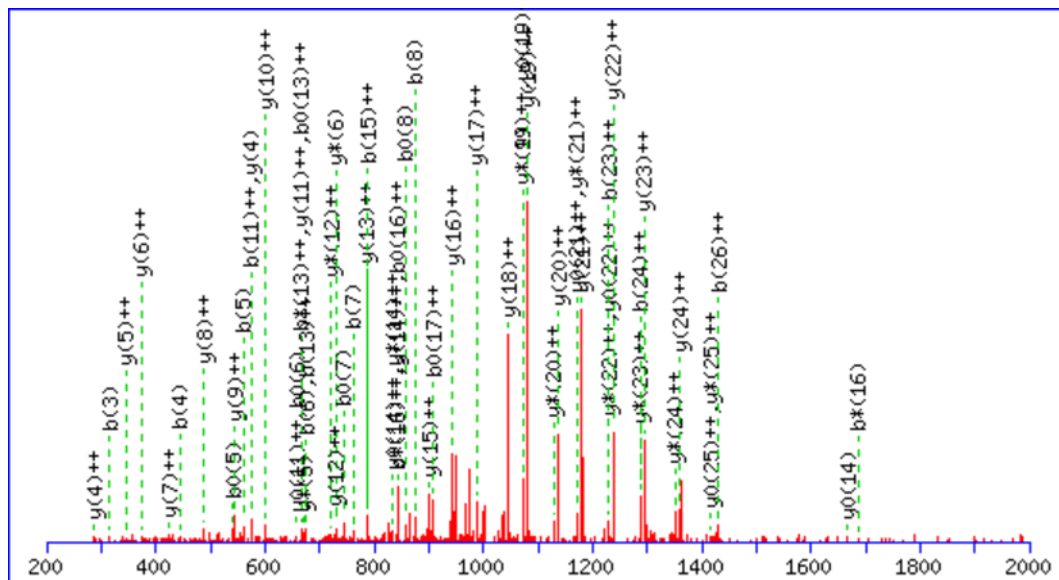

## Peptide View

MS/MS Fragmentation of **LLIYDASNLETGVPSR**

Found in **IPI00003111**, Tax\_Id=9606 Gene\_Symbol=LOC652694 Ig kappa chain V-I region AU

**Experiment:** 17 - NOPA2 **Fraction:** NOPA2

Match to Query 12037: 1746.917648 from(874.466100,2+)

Title: OECHL100312\_07.16831.16831.2.dta

Data file \\BOROMIR\Masse\Data LTQ-Orbitrap\Chrystelle Lacroix\Etude clinique sJPU\OECHL100312\_07.raw

**Monoisotopic mass of neutral peptide Mr(calc):** 1746.915192 **Fixed modifications:** Carbamidomethyl (C) (apply to specified residues or termini only) **Ions**

**Score:** 82 **Expect:** 6.1e-007 **Matches :** 27/156 fragment ions using 42 most intense peaks ([help](#))

| # | b          | b <sup>++</sup> | b* | b <sup>*++</sup> | b <sup>0</sup>    | b <sup>0++</sup> | Seq. | y                  | y <sup>++</sup>   | y*          | y <sup>*++</sup> | y <sup>0</sup>     | y <sup>0++</sup> |
|---|------------|-----------------|----|------------------|-------------------|------------------|------|--------------------|-------------------|-------------|------------------|--------------------|------------------|
| 1 | 114.091340 | 57.549308       |    |                  |                   |                  | L    |                    |                   |             |                  |                    |                  |
| 2 | 227.175404 | 114.091340      |    |                  |                   |                  | L    | 1634.838427        | 817.922852        | 1617.811878 | 809.409577       | 1616.827862        | 808.9175         |
| 3 | 340.259468 | 170.633372      |    |                  |                   |                  | I    | <b>1521.754363</b> | 761.380820        | 1504.727814 | 752.867545       | 1503.743798        | 752.3755         |
| 4 | 503.322797 | 252.165036      |    |                  |                   |                  | Y    | 1408.670299        | <b>704.838788</b> | 1391.643750 | 696.325513       | <b>1390.659734</b> | 695.8335         |
| 5 | 618.349740 | 309.678508      |    |                  | <b>600.339175</b> | 300.673226       | D    | <b>1245.606970</b> | 623.307123        | 1228.580421 | 614.793849       | 1227.596405        | 614.3018         |

|    |                    |                   |                    |            |             |            |   |                    |            |                   |            |                   |          |
|----|--------------------|-------------------|--------------------|------------|-------------|------------|---|--------------------|------------|-------------------|------------|-------------------|----------|
| 6  | 689.386854         | 345.197065        |                    |            | 671.376289  | 336.191782 | A | <b>1130.580027</b> | 565.793652 | 1113.553478       | 557.280377 | 1112.569462       | 556.7883 |
| 7  | 776.418882         | 388.713079        |                    |            | 758.408317  | 379.707796 | S | <b>1059.542913</b> | 530.275095 | 1042.516364       | 521.761820 | 1041.532348       | 521.2698 |
| 8  | 890.461809         | 445.734542        | <b>873.435260</b>  | 437.221268 | 872.451244  | 436.729260 | N | <b>972.510885</b>  | 486.759081 | 955.484336        | 478.245806 | 954.500320        | 477.7537 |
| 9  | <b>1003.545873</b> | 502.276574        | <b>986.519324</b>  | 493.763300 | 985.535308  | 493.271292 | L | <b>858.467958</b>  | 429.737617 | 841.441409        | 421.224343 | 840.457393        | 420.7323 |
| 10 | <b>1132.588466</b> | 566.797871        | 1115.561917        | 558.284597 | 1114.577901 | 557.792588 | E | <b>745.383894</b>  | 373.195585 | 728.357345        | 364.682311 | 727.373329        | 364.1903 |
| 11 | <b>1233.636145</b> | <b>617.321710</b> | 1216.609596        | 608.808436 | 1215.625580 | 608.316428 | T | <b>616.341301</b>  | 308.674289 | 599.314752        | 300.161014 | 598.330736        | 299.6690 |
| 12 | <b>1290.657609</b> | 645.832442        | 1273.631060        | 637.319168 | 1272.647044 | 636.827160 | G | <b>515.293622</b>  | 258.150449 | 498.267073        | 249.637175 | 497.283057        | 249.1451 |
| 13 | <b>1389.726023</b> | 695.366649        | <b>1372.699474</b> | 686.853375 | 1371.715458 | 686.361367 | V | <b>458.272158</b>  | 229.639717 | 441.245609        | 221.126443 | 440.261593        | 220.6344 |
| 14 | <b>1486.778787</b> | 743.893032        | 1469.752238        | 735.379757 | 1468.768222 | 734.887749 | P | <b>359.203744</b>  | 180.105510 | <b>342.177195</b> | 171.592236 | <b>341.193179</b> | 171.1002 |
| 15 | <b>1573.810815</b> | 787.409046        | 1556.784266        | 778.895771 | 1555.800250 | 778.403763 | S | 262.150980         | 131.579128 | 245.124431        | 123.065854 | 244.140415        | 122.5738 |
| 16 |                    |                   |                    |            |             |            | R | 175.118952         | 88.063114  | 158.092403        | 79.549839  |                   |          |

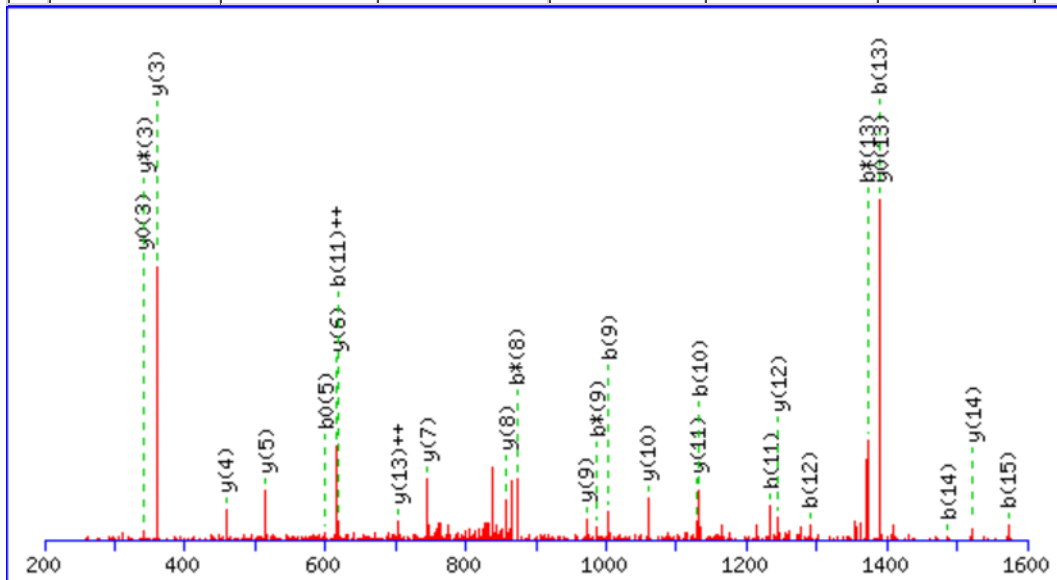

## Peptide View

MS/MS Fragmentation of **DFSLTSSSQTPGATK**

Found in **IPI00291300**, Tax\_Id=9606 Gene\_Symbol=PODXL2 Putative uncharacterized protein PODXL2

**Experiment:** 17 - NOPA2 **Fraction:** NOPA2

Match to Query 9811: 1525.726848 from(763.870700,2+)

Title: OECHL100312\_07.10689.10689.2.dta

Data file \\BOROMIR\Masse\Data LTQ-Orbitrap\Chrystelle Lacroix\Etude clinique sJPU\OECHL100312\_07.raw

**Monoisotopic mass of neutral peptide Mr(calc):** 1525.726028**Fixed modifications:** Carbamidomethyl (C) (apply to specified residues or termini only)**Ions****Score:** 75 **Expect:** 3.8e-006**Matches :** 32/150 fragment ions using 51 most intense peaks ([help](#))

| #  | <b>b</b>           | <b>b<sup>++</sup></b> | <b>b<sup>*</sup></b> | <b>b<sup>*++</sup></b> | <b>b<sup>0</sup></b> | <b>b<sup>0++</sup></b> | Seq.     | <b>y</b>           | <b>y<sup>++</sup></b> | <b>y<sup>*</sup></b> | <b>y<sup>*++</sup></b> | <b>y<sup>0</sup></b> | <b>y<sup>0++</sup></b> |
|----|--------------------|-----------------------|----------------------|------------------------|----------------------|------------------------|----------|--------------------|-----------------------|----------------------|------------------------|----------------------|------------------------|
| 1  | 116.034219         | 58.520748             |                      |                        | 98.023654            | 49.515465              | <b>D</b> |                    |                       |                      |                        |                      |                        |
| 2  | <b>263.102633</b>  | 132.054954            |                      |                        | 245.092068           | 123.049672             | <b>F</b> | 1411.706351        | 706.356813            | 1394.679802          | 697.843539             | 1393.695786          | 697.3515               |
| 3  | <b>350.134661</b>  | 175.570968            |                      |                        | <b>332.124096</b>    | 166.565686             | <b>S</b> | 1264.637937        | <b>632.822607</b>     | 1247.611388          | <b>624.309332</b>      | 1246.627372          | <b>623.8173</b>        |
| 4  | 463.218725         | 232.113001            |                      |                        | <b>445.208160</b>    | 223.107718             | <b>L</b> | <b>1177.605909</b> | 589.306592            | 1160.579360          | 580.793318             | 1159.595344          | 580.3013               |
| 5  | <b>564.266404</b>  | 282.636840            |                      |                        | <b>546.255839</b>    | 273.631558             | <b>T</b> | <b>1064.521845</b> | 532.764561            | 1047.495296          | 524.251286             | 1046.511280          | 523.7592               |
| 6  | 651.298432         | 326.152854            |                      |                        | <b>633.287867</b>    | 317.147572             | <b>S</b> | <b>963.474166</b>  | 482.240721            | 946.447617           | <b>473.727446</b>      | 945.463601           | <b>473.2354</b>        |
| 7  | 738.330460         | 369.668868            |                      |                        | 720.319895           | 360.663586             | <b>S</b> | <b>876.442138</b>  | 438.724707            | 859.415589           | 430.211432             | 858.431573           | 429.7194               |
| 8  | <b>825.362488</b>  | 413.184882            |                      |                        | 807.351923           | 404.179599             | <b>S</b> | <b>789.410110</b>  | 395.208693            | 772.383561           | 386.695418             | 771.399545           | 386.2034               |
| 9  | <b>953.421066</b>  | 477.214171            | 936.394517           | 468.700897             | <b>935.410501</b>    | 468.208889             | <b>Q</b> | <b>702.378082</b>  | 351.692679            | 685.351533           | 343.179404             | 684.367517           | 342.6873               |
| 10 | <b>1054.468745</b> | 527.738010            | 1037.442196          | 519.224736             | <b>1036.458180</b>   | 518.732728             | <b>T</b> | <b>574.319504</b>  | 287.663390            | 557.292955           | 279.150115             | 556.308939           | 278.6581               |
| 11 | 1151.521509        | 576.264392            | 1134.494960          | 567.751118             | 1133.510944          | 567.259110             | <b>P</b> | <b>473.271825</b>  | 237.139550            | 456.245276           | 228.626276             | 455.261260           | 228.1342               |
| 12 | <b>1208.542973</b> | 604.775124            | 1191.516424          | 596.261850             | 1190.532408          | 595.769842             | <b>G</b> | <b>376.219061</b>  | 188.613168            | 359.192512           | 180.099894             | 358.208496           | 179.6078               |
| 13 | <b>1279.580087</b> | 640.293681            | 1262.553538          | 631.780407             | <b>1261.569522</b>   | 631.288399             | <b>A</b> | 319.197597         | 160.102436            | 302.171048           | 151.589162             | 301.187032           | 151.0971               |
| 14 | <b>1380.627766</b> | 690.817521            | 1363.601217          | 682.304246             | <b>1362.617201</b>   | 681.812238             | <b>T</b> | <b>248.160483</b>  | 124.583879            | 231.133934           | 116.070605             | 230.149918           | 115.5785               |
| 15 |                    |                       |                      |                        |                      |                        | <b>K</b> | 147.112804         | 74.060040             | 130.086255           | 65.546765              |                      |                        |

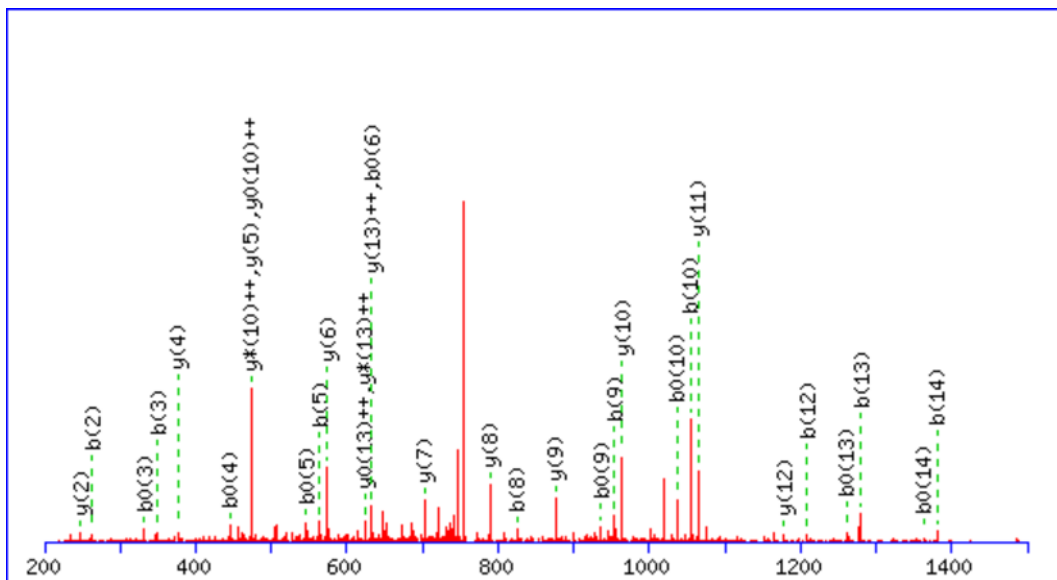

## Peptide View

MS/MS Fragmentation of **ESLDVYELDAK**

Found in **IPI00013698**, Tax\_Id=9606 Gene\_Symbol=ASAHI Isoform 1 of Acid ceramidase

**Experiment:** 17 - NOPA2 **Fraction:** NOPA2

Match to Query 7129: 1280.613848 from(641.314200,2+)

Title: OECHL100312\_07.14236.14236.2.dta

Data file \\BOROMIR\Masse\Data LTQ-Orbitrap\Chrystelle Lacroix\Etude clinique sJPU\OECHL100312\_07.raw

**Monoisotopic mass of neutral peptide Mr(calc):** 1280.613586 **Fixed modifications:** Carbamidomethyl (C) (apply to specified residues or termini only) **Ions**

**Score:** 69 **Expect:** 1.1e-005 **Matches :** 16/96 fragment ions using 22 most intense peaks ([help](#))

| # | b          | b <sup>++</sup> | b <sup>0</sup>    | b <sup>0++</sup> | Seq.     | y                  | y <sup>++</sup> | y*                 | y <sup>*++</sup> | y <sup>0</sup> | y <sup>0++</sup> | #         |
|---|------------|-----------------|-------------------|------------------|----------|--------------------|-----------------|--------------------|------------------|----------------|------------------|-----------|
| 1 | 130.049869 | 65.528572       | 112.039304        | 56.523290        | <b>E</b> |                    |                 |                    |                  |                |                  | <b>11</b> |
| 2 | 217.081897 | 109.044586      | 199.071332        | 100.039304       | <b>S</b> | 1152.578296        | 576.792786      | <b>1135.551747</b> | 568.279512       | 1134.567731    | 567.787504       | <b>10</b> |
| 3 | 330.165961 | 165.586618      | 312.155396        | 156.581336       | <b>L</b> | <b>1065.546268</b> | 533.276772      | 1048.519719        | 524.763498       | 1047.535703    | 524.271490       | <b>9</b>  |
| 4 | 445.192904 | 223.100090      | <b>427.182339</b> | 214.094808       | <b>D</b> | <b>952.462204</b>  | 476.734740      | 935.435655         | 468.221466       | 934.451639     | 467.729458       | <b>8</b>  |
| 5 | 544.261318 | 272.634297      | <b>526.250753</b> | 263.629015       | <b>V</b> | <b>837.435261</b>  | 419.221269      | 820.408712         | 410.707994       | 819.424696     | 410.215986       | <b>7</b>  |



|    |             |            |             |            |   |            |            |            |            |            |            |   |
|----|-------------|------------|-------------|------------|---|------------|------------|------------|------------|------------|------------|---|
| 6  | 707.324647  | 354.165962 | 689.314082  | 345.160679 | Y | 738.366847 | 369.687062 | 721.340298 | 361.173787 | 720.356282 | 360.681779 | 6 |
| 7  | 836.367240  | 418.687258 | 818.356675  | 409.681976 | E | 575.303518 | 288.155397 | 558.276969 | 279.642123 | 557.292953 | 279.150115 | 5 |
| 8  | 949.451304  | 475.229290 | 931.440739  | 466.224008 | L | 446.260925 | 223.634101 | 429.234376 | 215.120826 | 428.250360 | 214.628818 | 4 |
| 9  | 1064.478247 | 532.742762 | 1046.467682 | 523.737479 | D | 333.176861 | 167.092069 | 316.150312 | 158.578794 | 315.166296 | 158.086786 | 3 |
| 10 | 1135.515361 | 568.261319 | 1117.504796 | 559.256036 | A | 218.149918 | 109.578597 | 201.123369 | 101.065322 |            |            | 2 |
| 11 |             |            |             |            | K | 147.112804 | 74.060040  | 130.086255 | 65.546765  |            |            | 1 |

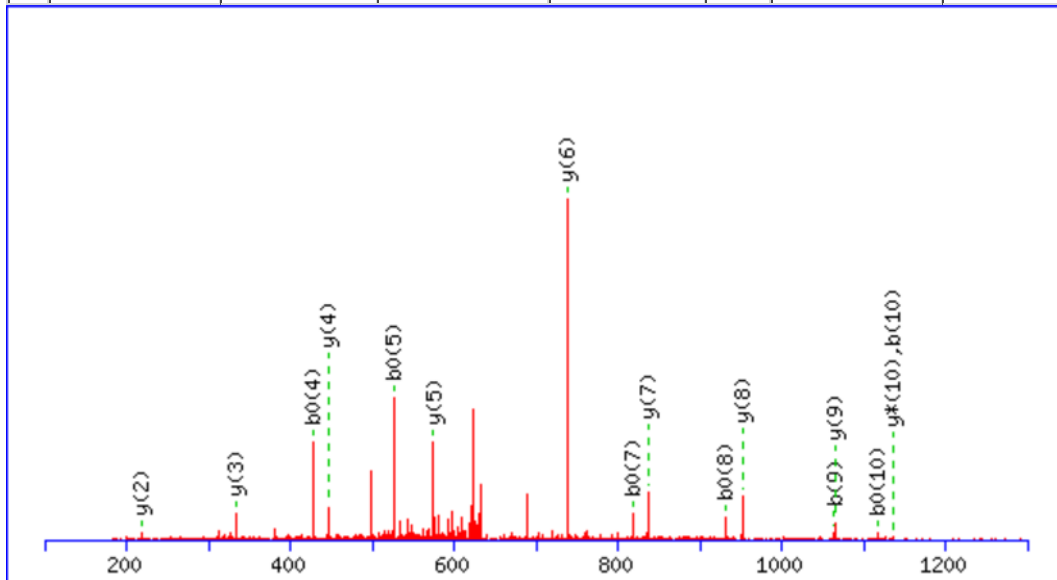

## Peptide View

MS/MS Fragmentation of **SDAAVDTSSSEITTK**

Found in **IPI00412977**, Tax\_Id=9606 Gene\_Symbol=- Prothymosin alpha

**Experiment:** 17 - NOPA2 **Fraction:** NOPA2

Match to Query 9086: 1465.679648 from(733.847100,2+)

Title: OECHL100312\_07.9745.9745.2.dta

Data file \\BOROMIR\Masse\Data LTQ-Orbitrap\Chrystelle Lacroix\Etude clinique sJPU\OECHL100312\_07.raw

**Monoisotopic mass of neutral peptide Mr(calc):** 1465.678391 **Fixed modifications:** Carbamidomethyl (C) (apply to specified residues or termini only) **Variable modifications:** N-term : Acetyl (N-term) **Ions Score:** 64 **Expect:** 2.8e-005 **Matches :** 19/128 fragment ions using 24 most intense peaks ([help](#))

| #  | b           | b <sup>++</sup> | b <sup>0</sup> | b <sup>0++</sup> | Seq. | y           | y <sup>++</sup> | y*          | y* <sup>++</sup> | y <sup>0</sup> | y <sup>0++</sup> | #  |
|----|-------------|-----------------|----------------|------------------|------|-------------|-----------------|-------------|------------------|----------------|------------------|----|
| 1  | 130.049869  | 65.528572       | 112.039304     | 56.523290        | S    |             |                 |             |                  |                |                  | 14 |
| 2  | 245.076812  | 123.042044      | 227.066247     | 114.036761       | D    | 1337.643082 | 669.325179      | 1320.616533 | 660.811905       | 1319.632517    | 660.319897       | 13 |
| 3  | 316.113926  | 158.560601      | 298.103361     | 149.555319       | A    | 1222.616139 | 611.811708      | 1205.589590 | 603.298433       | 1204.605574    | 602.806425       | 12 |
| 4  | 387.151040  | 194.079158      | 369.140475     | 185.073875       | A    | 1151.579025 | 576.293151      | 1134.552476 | 567.779876       | 1133.568460    | 567.287868       | 11 |
| 5  | 486.219454  | 243.613365      | 468.208889     | 234.608082       | V    | 1080.541911 | 540.774594      | 1063.515362 | 532.261319       | 1062.531346    | 531.769311       | 10 |
| 6  | 601.246397  | 301.126837      | 583.235832     | 292.121554       | D    | 981.473497  | 491.240387      | 964.446948  | 482.727112       | 963.462932     | 482.235104       | 9  |
| 7  | 702.294076  | 351.650676      | 684.283511     | 342.645394       | T    | 866.446554  | 433.726915      | 849.420005  | 425.213641       | 848.435989     | 424.721633       | 8  |
| 8  | 789.326104  | 395.166690      | 771.315539     | 386.161408       | S    | 765.398875  | 383.203076      | 748.372326  | 374.689801       | 747.388310     | 374.197793       | 7  |
| 9  | 876.358132  | 438.682704      | 858.347567     | 429.677421       | S    | 678.366847  | 339.687062      | 661.340298  | 331.173787       | 660.356282     | 330.681779       | 6  |
| 10 | 1005.400725 | 503.204001      | 987.390160     | 494.198718       | E    | 591.334819  | 296.171048      | 574.308270  | 287.657773       | 573.324254     | 287.165765       | 5  |
| 11 | 1118.484789 | 559.746033      | 1100.474224    | 550.740750       | I    | 462.292226  | 231.649751      | 445.265677  | 223.136477       | 444.281661     | 222.644469       | 4  |
| 12 | 1219.532468 | 610.269872      | 1201.521903    | 601.264590       | T    | 349.208162  | 175.107719      | 332.181613  | 166.594445       | 331.197597     | 166.102437       | 3  |
| 13 | 1320.580147 | 660.793712      | 1302.569582    | 651.788429       | T    | 248.160483  | 124.583879      | 231.133934  | 116.070605       | 230.149918     | 115.578597       | 2  |
| 14 |             |                 |                |                  | K    | 147.112804  | 74.060040       | 130.086255  | 65.546765        |                |                  | 1  |

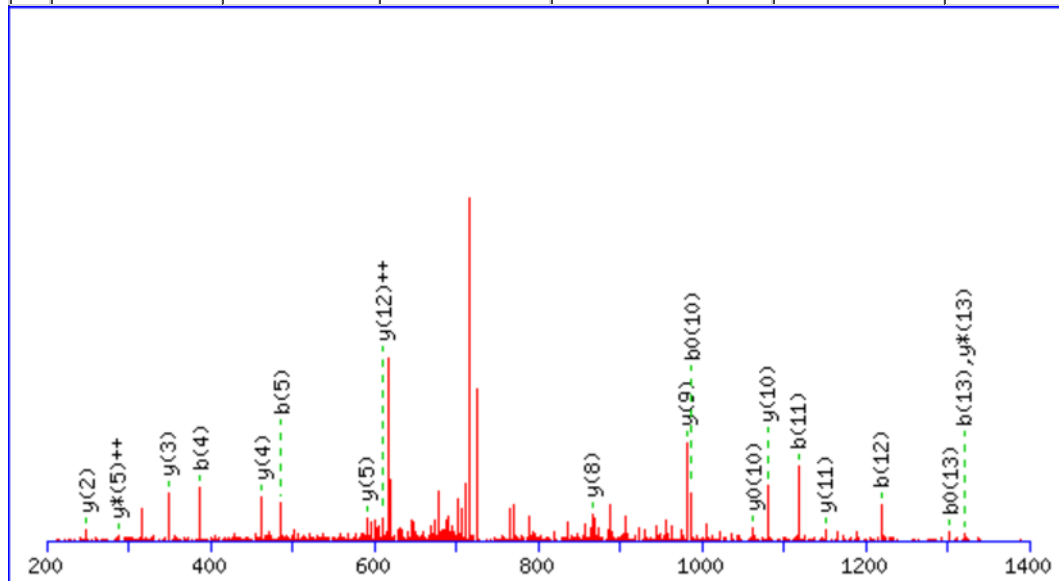

## Peptide View

MS/MS Fragmentation of **GLAEAAGPR**

Found in **IPI00290826**, Tax\_Id=9606 Gene\_Symbol=FAM174A Membrane protein FAM174A

**Experiment:** 17 - NOPA2 **Fraction:** NOPA2

Match to Query 1103: 840.446848 from(421.230700,2+)

Title: OECHL100312\_07.3974.3974.2.dta

Data file \\BOROMIR\Masse\Data LTQ-Orbitrap\Chrystelle Lacroix\Etude clinique sJPU\OECHL100312\_07.raw

**Monoisotopic mass of neutral peptide Mr(calc):** 840.445343**Fixed modifications:** Carbamidomethyl (C) (apply to specified residues or termini only)**Ions Score:**

53 **Expect:** 0.00031**Matches :** 17/64 fragment ions using 28 most intense peaks ([help](#))

| # | b                 | b <sup>++</sup> | b <sup>0</sup>    | b <sup>0++</sup> | Seq. | y                 | y <sup>++</sup>   | y <sup>*</sup> | y <sup>*++</sup> | y <sup>0</sup>    | y <sup>0++</sup> | # |
|---|-------------------|-----------------|-------------------|------------------|------|-------------------|-------------------|----------------|------------------|-------------------|------------------|---|
| 1 | 58.028740         | 29.518008       |                   |                  | G    |                   |                   |                |                  |                   |                  | 9 |
| 2 | <b>171.112804</b> | 86.060040       |                   |                  | L    | 784.431179        | 392.719228        | 767.404630     | 384.205953       | 766.420614        | 383.713945       | 8 |
| 3 | <b>242.149918</b> | 121.578597      |                   |                  | A    | <b>671.347115</b> | 336.177196        | 654.320566     | 327.663921       | <b>653.336550</b> | 327.171913       | 7 |
| 4 | <b>371.192511</b> | 186.099894      | 353.181946        | 177.094611       | E    | <b>600.310001</b> | 300.658639        | 583.283452     | 292.145364       | 582.299436        | 291.653356       | 6 |
| 5 | <b>442.229625</b> | 221.618450      | 424.219060        | 212.613168       | A    | <b>471.267408</b> | 236.137342        | 454.240859     | 227.624067       |                   |                  | 5 |
| 6 | <b>513.266739</b> | 257.137008      | 495.256174        | 248.131725       | A    | <b>400.230294</b> | <b>200.618785</b> | 383.203745     | 192.105510       |                   |                  | 4 |
| 7 | <b>570.288203</b> | 285.647740      | <b>552.277638</b> | 276.642457       | G    | <b>329.193180</b> | 165.100228        | 312.166631     | 156.586953       |                   |                  | 3 |
| 8 | <b>667.340967</b> | 334.174122      | 649.330402        | 325.168839       | P    | <b>272.171716</b> | 136.589496        | 255.145167     | 128.076221       |                   |                  | 2 |
| 9 |                   |                 |                   |                  | R    | <b>175.118952</b> | 88.063114         | 158.092403     | 79.549839        |                   |                  | 1 |

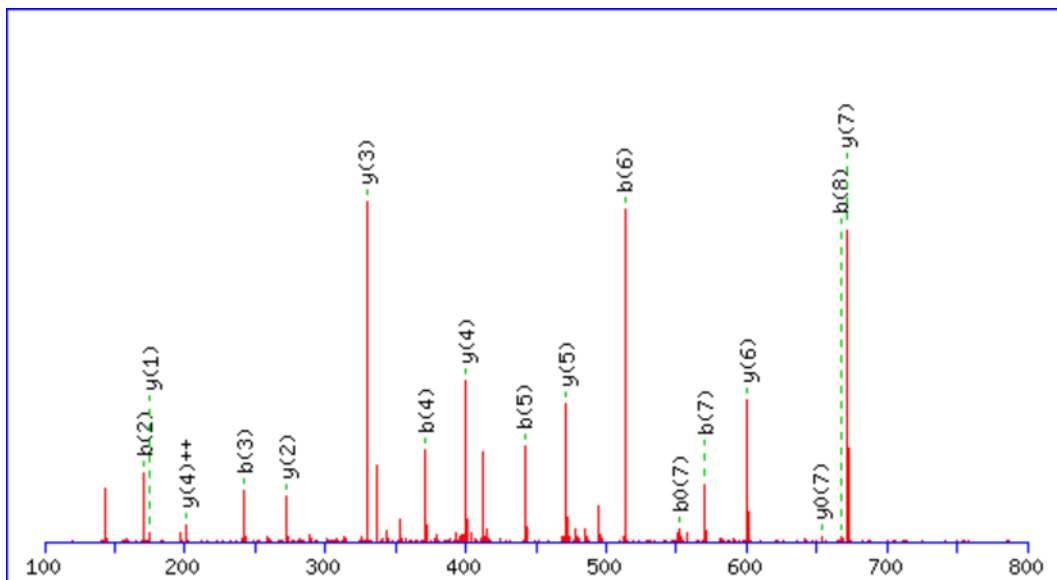

## Peptide View

MS/MS Fragmentation of **TGTLFMGR**

Found in **IPI00016150**, Tax\_Id=9606 Gene\_Symbol=SERPINI1 Neuroserpin

**Experiment:** 17 - NOPA2 **Fraction:** NOPA2

Match to Query 2729: 994.526048 from(498.270300,2+)

Title: OECHL100312\_07.15619.15619.2.dta

Data file \\BOROMIR\Masse\Data LTQ-Orbitrap\Chrystelle Lacroix\Etude clinique sJPU\OECHL100312\_07.raw

**Monoisotopic mass of neutral peptide Mr(calc):** 994.526993 **Fixed modifications:** Carbamidomethyl (C) (apply to specified residues or termini only) **Ions Score:**

59 **Expect:** 5.3e-005 **Matches :** 11/68 fragment ions using 18 most intense peaks ([help](#))

| # | b          | b <sup>++</sup> | b <sup>0</sup> | b <sup>0++</sup> | Seq. | y          | y <sup>++</sup> | y <sup>*</sup> | y <sup>*++</sup> | y <sup>0</sup> | y <sup>0++</sup> | # |
|---|------------|-----------------|----------------|------------------|------|------------|-----------------|----------------|------------------|----------------|------------------|---|
| 1 | 102.054955 | 51.531116       | 84.044390      | 42.525833        | T    |            |                 |                |                  |                |                  | 9 |
| 2 | 159.076419 | 80.041847       | 141.065854     | 71.036565        | G    | 894.486586 | 447.746931      | 877.460037     | 439.233657       | 876.476021     | 438.741649       | 8 |
| 3 | 260.124098 | 130.565687      | 242.113533     | 121.560405       | T    | 837.465122 | 419.236199      | 820.438573     | 410.722925       | 819.454557     | 410.230917       | 7 |
| 4 | 373.208162 | 187.107719      | 355.197597     | 178.102437       | I    | 736.417443 | 368.712360      | 719.390894     | 360.199085       |                |                  | 6 |
| 5 | 486.292226 | 243.649751      | 468.281661     | 234.644469       | L    | 623.333379 | 312.170328      | 606.306830     | 303.657053       |                |                  | 5 |

|   |            |            |            |            |   |            |            |            |            |  |  |   |
|---|------------|------------|------------|------------|---|------------|------------|------------|------------|--|--|---|
| 6 | 633.360640 | 317.183958 | 615.350075 | 308.178676 | F | 510.249315 | 255.628296 | 493.222766 | 247.115021 |  |  | 4 |
| 7 | 764.401125 | 382.704201 | 746.390560 | 373.698918 | M | 363.180901 | 182.094089 | 346.154352 | 173.580814 |  |  | 3 |
| 8 | 821.422589 | 411.214933 | 803.412024 | 402.209650 | G | 232.140416 | 116.573846 | 215.113867 | 108.060572 |  |  | 2 |
| 9 |            |            |            |            | R | 175.118952 | 88.063114  | 158.092403 | 79.549840  |  |  | 1 |

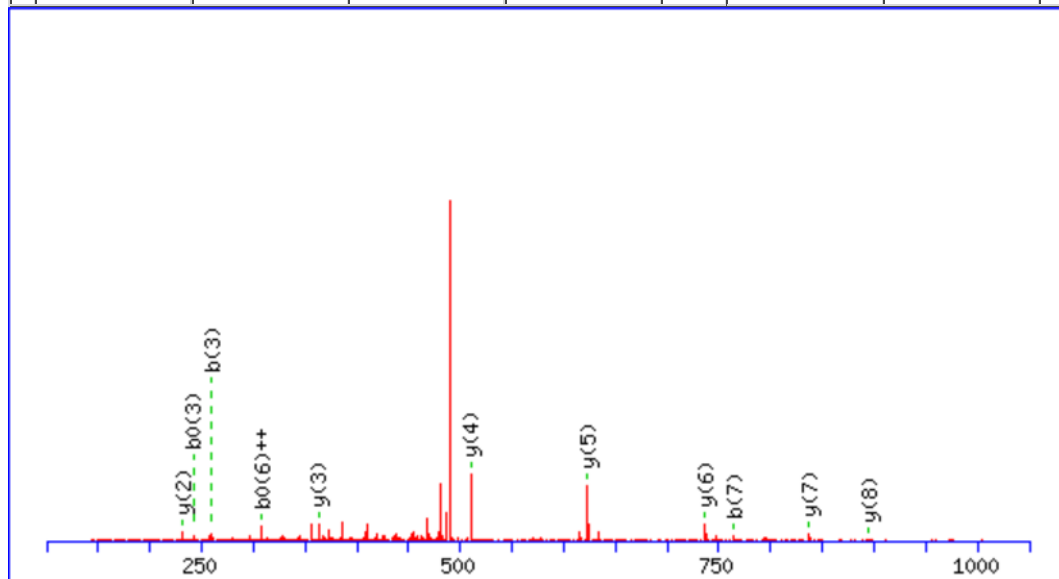

## Peptide View

MS/MS Fragmentation of **EVQLVESGGGLV~~K~~PGGSLR**

Found in **IPI00783024**, Tax\_Id=9606 Gene\_Symbol=- Myosin-reactive immunoglobulin heavy chain variable region (Fragment)

**Experiment:** 17 - NOPA2 **Fraction:** NOPA2

Match to Query 12985: 1881.034848 from(941.524700,2+)

Title: OECHL100312\_07.13589.13589.2.dta

Data file \\BOROMIR\Masse\Data LTQ-Orbitrap\Chrystelle Lacroix\Etude clinique sJPU\OECHL100312\_07.raw

**Monoisotopic mass of neutral peptide Mr(calc):** 1881.031982 **Fixed modifications:** Carbamidomethyl (C) (apply to specified residues or termini only) **Ions**

**Score:** 58 **Expect:** 7.9e-005 **Matches :** 41/208 fragment ions using 80 most intense peaks ([help](#))

| # | b          | b <sup>++</sup> | b <sup>*</sup> | b <sup>*++</sup> | b <sup>0</sup> | b <sup>0++</sup> | Seq.     | y | y <sup>++</sup> | y <sup>*</sup> | y <sup>*++</sup> | y <sup>0</sup> | y <sup>0++</sup> |
|---|------------|-----------------|----------------|------------------|----------------|------------------|----------|---|-----------------|----------------|------------------|----------------|------------------|
| 1 | 130.049869 | 65.528572       |                |                  | 112.039304     | 56.523290        | <b>E</b> |   |                 |                |                  |                |                  |

|    |                    |            |                    |                   |                    |            |   |                    |                   |                    |                   |                    |          |
|----|--------------------|------------|--------------------|-------------------|--------------------|------------|---|--------------------|-------------------|--------------------|-------------------|--------------------|----------|
| 2  | 229.118283         | 115.062780 |                    |                   | 211.107718         | 106.057497 | V | 1752.996660        | 877.001968        | 1735.970111        | 868.488694        | 1734.986095        | 867.9966 |
| 3  | <b>357.176861</b>  | 179.092069 | 340.150312         | 170.578794        | <b>339.166296</b>  | 170.086786 | Q | <b>1653.928246</b> | <b>827.467761</b> | 1636.901697        | <b>818.954487</b> | 1635.917681        | 818.4624 |
| 4  | <b>470.260925</b>  | 235.634101 | <b>453.234376</b>  | 227.120826        | <b>452.250360</b>  | 226.628818 | L | <b>1525.869668</b> | <b>763.438472</b> | 1508.843119        | 754.925198        | 1507.859103        | 754.4331 |
| 5  | <b>569.329339</b>  | 285.168308 | 552.302790         | 276.655033        | <b>551.318774</b>  | 276.163025 | V | <b>1412.785604</b> | 706.896440        | <b>1395.759055</b> | 698.383166        | <b>1394.775039</b> | 697.8911 |
| 6  | 698.371932         | 349.689604 | 681.345383         | 341.176330        | 680.361367         | 340.684322 | E | <b>1313.717190</b> | 657.362233        | <b>1296.690641</b> | 648.848959        | <b>1295.706625</b> | 648.3569 |
| 7  | 785.403960         | 393.205618 | 768.377411         | 384.692344        | 767.393395         | 384.200336 | S | <b>1184.674597</b> | 592.840937        | 1167.648048        | 584.327662        | 1166.664032        | 583.8356 |
| 8  | 842.425424         | 421.716350 | 825.398875         | 413.203076        | 824.414859         | 412.711068 | G | <b>1097.642569</b> | 549.324923        | 1080.616020        | 540.811648        | 1079.632004        | 540.3196 |
| 9  | 899.446888         | 450.227082 | 882.420339         | 441.713808        | 881.436323         | 441.221800 | G | <b>1040.621105</b> | 520.814191        | 1023.594556        | 512.300916        | 1022.610540        | 511.8089 |
| 10 | 956.468352         | 478.737814 | 939.441803         | <b>470.224540</b> | 938.457787         | 469.732532 | G | <b>983.599641</b>  | 492.303459        | 966.573092         | 483.790184        | 965.589076         | 483.2981 |
| 11 | <b>1069.552416</b> | 535.279846 | 1052.525867        | 526.766572        | <b>1051.541851</b> | 526.274564 | L | 926.578177         | 463.792727        | 909.551628         | 455.279452        | 908.567612         | 454.7874 |
| 12 | <b>1168.620830</b> | 584.814053 | 1151.594281        | 576.300779        | <b>1150.610265</b> | 575.808771 | V | <b>813.494113</b>  | 407.250695        | 796.467564         | 398.737420        | 795.483548         | 398.2454 |
| 13 | <b>1296.715793</b> | 648.861535 | 1279.689244        | 640.348260        | 1278.705228        | 639.856252 | K | <b>714.425699</b>  | <b>357.716487</b> | 697.399150         | 349.203213        | 696.415134         | 348.7112 |
| 14 | 1393.768557        | 697.387917 | 1376.742008        | 688.874642        | 1375.757992        | 688.382634 | P | <b>586.330736</b>  | 293.669006        | <b>569.304187</b>  | 285.155731        | 568.320171         | 284.6637 |
| 15 | 1450.790021        | 725.898649 | 1433.763472        | 717.385374        | 1432.779456        | 716.893366 | G | 489.277972         | 245.142624        | 472.251423         | 236.629349        | <b>471.267407</b>  | 236.1373 |
| 16 | 1507.811485        | 754.409381 | 1490.784936        | 745.896106        | 1489.800920        | 745.404098 | G | <b>432.256508</b>  | 216.631892        | 415.229959         | 208.118617        | 414.245943         | 207.6266 |
| 17 | 1594.843513        | 797.925395 | 1577.816964        | 789.412120        | 1576.832948        | 788.920112 | S | 375.235044         | 188.121160        | <b>358.208495</b>  | 179.607885        | <b>357.224479</b>  | 179.1158 |
| 18 | <b>1707.927577</b> | 854.467427 | <b>1690.901028</b> | 845.954152        | <b>1689.917012</b> | 845.462144 | L | 288.203016         | 144.605146        | 271.176467         | 136.091871        |                    |          |
| 19 |                    |            |                    |                   |                    |            | R | 175.118952         | 88.063114         | 158.092403         | 79.549839         |                    |          |

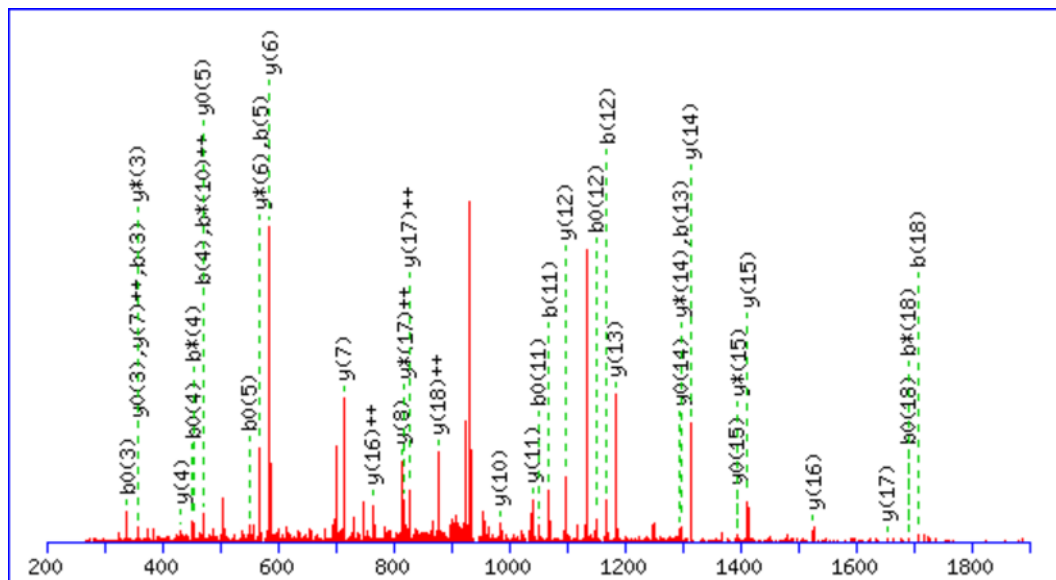

## Peptide View

### MS/MS Fragmentation of **AQLDSADIPKAR**

Found in **IPI00026303**, Tax\_Id=9606 Gene\_Symbol=PI15 Peptidase inhibitor 15

**Experiment:** 17 - NOPA2 **Fraction:** NOPA2

Match to Query 7161: 1283.683448 from(642.849000,2+)

Title: OECHL100312\_07.7738.7738.2.dta

Data file \\BOROMIR\Masse\Data LTQ-Orbitrap\Chrystelle Lacroix\Etude clinique sJPU\OECHL100312\_07.raw

**Monoisotopic mass of neutral peptide Mr(calc):** 1283.683334 **Fixed modifications:** Carbamidomethyl (C) (apply to specified residues or termini only) **Ions**

**Score:** 55 **Expect:** 0.00026 **Matches :** 20/114 fragment ions using 44 most intense peaks ([help](#))

| # | b                 | b <sup>++</sup> | b*         | b <sup>*++</sup> | b <sup>0</sup> | b <sup>0++</sup> | Seq. | y                  | y <sup>++</sup>   | y*          | y <sup>*++</sup> | y <sup>0</sup>     | y <sup>0++</sup> |
|---|-------------------|-----------------|------------|------------------|----------------|------------------|------|--------------------|-------------------|-------------|------------------|--------------------|------------------|
| 1 | 72.044390         | 36.525833       |            |                  |                |                  | A    |                    |                   |             |                  |                    |                  |
| 2 | <b>200.102968</b> | 100.555122      | 183.076419 | 92.041848        |                |                  | Q    | 1213.653527        | 607.330402        | 1196.626978 | 598.817127       | 1195.642962        | 598.3251         |
| 3 | <b>313.187032</b> | 157.097154      | 296.160483 | 148.583879       |                |                  | L    | <b>1085.594949</b> | <b>543.301113</b> | 1068.568400 | 534.787838       | <b>1067.584384</b> | 534.2958         |
| 4 | <b>428.213975</b> | 214.610626      | 411.187426 | 206.097351       | 410.203410     | 205.605343       | D    | <b>972.510885</b>  | <b>486.759081</b> | 955.484336  | 478.245806       | 954.500320         | 477.7537         |
| 5 | 515.246003        | 258.126640      | 498.219454 | 249.613365       | 497.235438     | 249.121357       | S    | <b>857.483942</b>  | <b>429.245609</b> | 840.457393  | 420.732335       | 839.473377         | 420.2403         |

|    |             |            |             |            |             |            |   |            |            |            |            |            |          |
|----|-------------|------------|-------------|------------|-------------|------------|---|------------|------------|------------|------------|------------|----------|
| 6  | 586.283117  | 293.645197 | 569.256568  | 285.131922 | 568.272552  | 284.639914 | A | 770.451914 | 385.729595 | 753.425365 | 377.216321 | 752.441349 | 376.7243 |
| 7  | 701.310060  | 351.158668 | 684.283511  | 342.645394 | 683.299495  | 342.153386 | D | 699.414800 | 350.211038 | 682.388251 | 341.697764 | 681.404235 | 341.2057 |
| 8  | 814.394124  | 407.700700 | 797.367575  | 399.187426 | 796.383559  | 398.695418 | I | 584.387857 | 292.697567 | 567.361308 | 284.184292 |            |          |
| 9  | 911.446888  | 456.227082 | 894.420339  | 447.713808 | 893.436323  | 447.221800 | P | 471.303793 | 236.155535 | 454.277244 | 227.642260 |            |          |
| 10 | 1039.541851 | 520.274564 | 1022.515302 | 511.761289 | 1021.531286 | 511.269281 | K | 374.251029 | 187.629153 | 357.224480 | 179.115878 |            |          |
| 11 | 1110.578965 | 555.793121 | 1093.552416 | 547.279846 | 1092.568400 | 546.787838 | A | 246.156066 | 123.581671 | 229.129517 | 115.068396 |            |          |
| 12 |             |            |             |            |             |            | R | 175.118952 | 88.063114  | 158.092403 | 79.549839  |            |          |

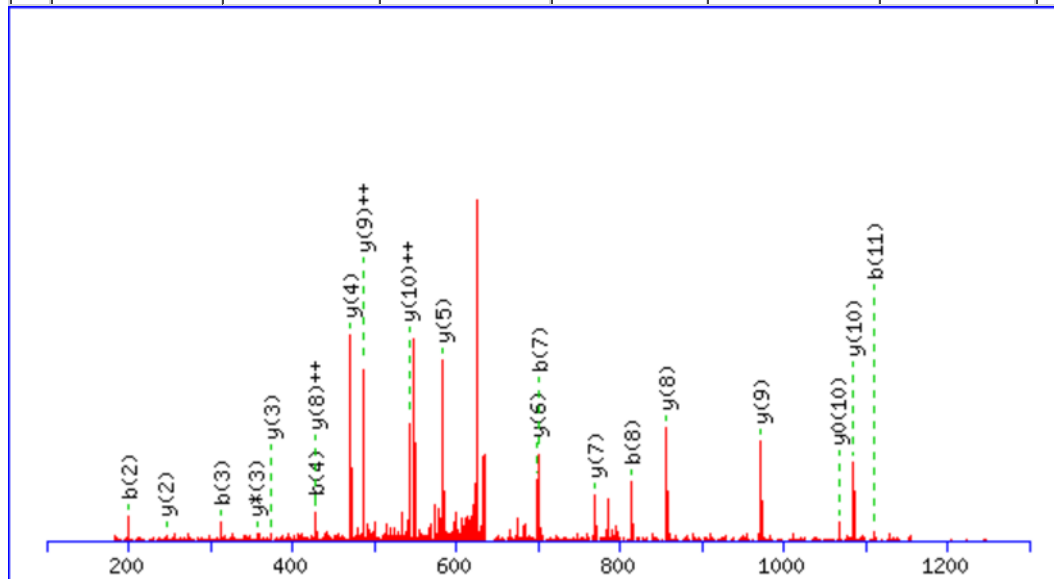

## Peptide View

MS/MS Fragmentation of **AVFVDLEPTVIDEVR**

Found in **IPI00166768**, Tax\_Id=9606 Gene\_Symbol=TUBA1C TUBA1C protein

Experiment: 17 - NOPA2 Fraction: NOPA2

Match to Query 11530: 1700.899648 from(851.457100,2+)

Title: OECHL100312\_07.19141.19141.2.dta

Data file \\BOROMIR\Masse\Data LTQ-Orbitrap\Chrystelle Lacroix\Etude clinique sJPU\OECHL100312\_07.raw

**Monoisotopic mass of neutral peptide Mr(calc): 1700.898514** Fixed modifications: Carbamidomethyl (C) (apply to specified residues or termini only) Ions



Score: 54 Expect: 0.00045 Matches : 12/128 fragment ions using 15 most intense peaks ([help](#))

| #  | b                  | b <sup>++</sup> | b <sup>0</sup> | b <sup>0++</sup> | Seq. | y                  | y <sup>++</sup> | y*          | y <sup>*++</sup> | y <sup>0</sup> | y <sup>0++</sup> | #  |
|----|--------------------|-----------------|----------------|------------------|------|--------------------|-----------------|-------------|------------------|----------------|------------------|----|
| 1  | 72.044390          | 36.525833       |                |                  | A    |                    |                 |             |                  |                |                  | 15 |
| 2  | 171.112804         | 86.060040       |                |                  | V    | 1630.868665        | 815.937971      | 1613.842116 | 807.424696       | 1612.858100    | 806.932688       | 14 |
| 3  | <b>318.181218</b>  | 159.594247      |                |                  | F    | 1531.800251        | 766.403764      | 1514.773702 | 757.890489       | 1513.789686    | 757.398481       | 13 |
| 4  | <b>417.249632</b>  | 209.128454      |                |                  | V    | <b>1384.731837</b> | 692.869557      | 1367.705288 | 684.356282       | 1366.721272    | 683.864274       | 12 |
| 5  | 532.276575         | 266.641926      | 514.266010     | 257.636643       | D    | <b>1285.663423</b> | 643.335350      | 1268.636874 | 634.822075       | 1267.652858    | 634.330067       | 11 |
| 6  | <b>645.360639</b>  | 323.183958      | 627.350074     | 314.178675       | L    | <b>1170.636480</b> | 585.821878      | 1153.609931 | 577.308604       | 1152.625915    | 576.816596       | 10 |
| 7  | <b>774.403232</b>  | 387.705254      | 756.392667     | 378.699972       | E    | <b>1057.552416</b> | 529.279846      | 1040.525867 | 520.766572       | 1039.541851    | 520.274564       | 9  |
| 8  | 871.455996         | 436.231636      | 853.445431     | 427.226354       | P    | <b>928.509823</b>  | 464.758550      | 911.483274  | 456.245275       | 910.499258     | 455.753267       | 8  |
| 9  | 972.503675         | 486.755476      | 954.493110     | 477.750193       | T    | 831.457059         | 416.232168      | 814.430510  | 407.718893       | 813.446494     | 407.226885       | 7  |
| 10 | 1071.572089        | 536.289683      | 1053.561524    | 527.284400       | V    | 730.409380         | 365.708328      | 713.382831  | 357.195054       | 712.398815     | 356.703046       | 6  |
| 11 | 1184.656153        | 592.831715      | 1166.645588    | 583.826432       | I    | <b>631.340966</b>  | 316.174121      | 614.314417  | 307.660846       | 613.330401     | 307.168838       | 5  |
| 12 | 1299.683096        | 650.345186      | 1281.672531    | 641.339904       | D    | <b>518.256902</b>  | 259.632089      | 501.230353  | 251.118815       | 500.246337     | 250.626807       | 4  |
| 13 | 1428.725689        | 714.866483      | 1410.715124    | 705.861200       | E    | 403.229959         | 202.118617      | 386.203410  | 193.605343       | 385.219394     | 193.113335       | 3  |
| 14 | <b>1527.794103</b> | 764.400690      | 1509.783538    | 755.395407       | V    | 274.187366         | 137.597321      | 257.160817  | 129.084047       |                |                  | 2  |
| 15 |                    |                 |                |                  | R    | 175.118952         | 88.063114       | 158.092403  | 79.549839        |                |                  | 1  |

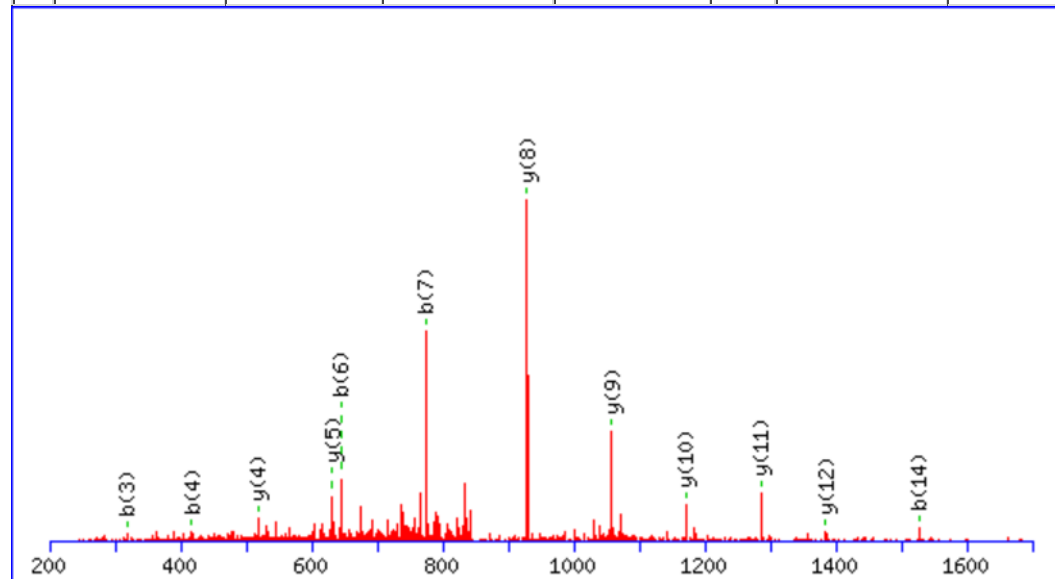

## Peptide View

MS/MS Fragmentation of **NKQDLINNITYKK**

Found in **IPI00220361**, Tax\_Id=9606 Gene\_Symbol=CALB1 Calbindin

Experiment: 17 - NOPA2 Fraction: NOPA2

Match to Query 12486: 1806.949248 from(904.481900,2+)

Title: OECHL100312\_07.10137.10137.2.dta

Data file \\BOROMIR\Masse\Data LTQ-Orbitrap\Chrystelle Lacroix\Etude clinique sJPU\OECHL100312\_07.raw

**Monoisotopic mass of neutral peptide Mr(calc):** 1806.947540**Fixed modifications:** Carbamidomethyl (C) (apply to specified residues or termini only)**Ions**

**Score:** 50 **Expect:** 0.00094**Matches :** 18/156 fragment ions using 32 most intense peaks ([help](#))

| #  | b                  | b <sup>++</sup> | b*          | b <sup>*++</sup> | b <sup>0</sup> | b <sup>0++</sup> | Seq. | y                  | y <sup>++</sup> | y*          | y <sup>*++</sup>  | y <sup>0</sup> | y <sup>0++</sup> |
|----|--------------------|-----------------|-------------|------------------|----------------|------------------|------|--------------------|-----------------|-------------|-------------------|----------------|------------------|
| 1  | 115.050203         | 58.028740       | 98.023654   | 49.515465        |                |                  | N    |                    |                 |             |                   |                |                  |
| 2  | 243.145166         | 122.076221      | 226.118617  | 113.562947       |                |                  | K    | 1693.911927        | 847.459602      | 1676.885378 | 838.946327        | 1675.901362    | 838.4543         |
| 3  | <b>371.203744</b>  | 186.105510      | 354.177195  | 177.592236       |                |                  | Q    | <b>1565.816964</b> | 783.412120      | 1548.790415 | 774.898846        | 1547.806399    | 774.4068         |
| 4  | <b>486.230687</b>  | 243.618982      | 469.204138  | 235.105707       | 468.220122     | 234.613699       | D    | <b>1437.758386</b> | 719.382831      | 1420.731837 | 710.869557        | 1419.747821    | 710.3775         |
| 5  | <b>599.314751</b>  | 300.161014      | 582.288202  | 291.647739       | 581.304186     | 291.155731       | L    | <b>1322.731443</b> | 661.869359      | 1305.704894 | 653.356085        | 1304.720878    | 652.8640         |
| 6  | <b>714.341694</b>  | 357.674485      | 697.315145  | 349.161211       | 696.331129     | 348.669203       | D    | <b>1209.647379</b> | 605.327328      | 1192.620830 | 596.814053        | 1191.636814    | 596.3220         |
| 7  | 827.425758         | 414.216517      | 810.399209  | 405.703243       | 809.415193     | 405.211235       | I    | <b>1094.620436</b> | 547.813856      | 1077.593887 | <b>539.300582</b> | 1076.609871    | <b>538.8085</b>  |
| 8  | 941.468685         | 471.237981      | 924.442136  | 462.724706       | 923.458120     | 462.232698       | N    | <b>981.536372</b>  | 491.271824      | 964.509823  | 482.758550        | 963.525807     | 482.2665         |
| 9  | 1055.511612        | 528.259444      | 1038.485063 | 519.746170       | 1037.501047    | 519.254162       | N    | 867.493445         | 434.250361      | 850.466896  | 425.737086        | 849.482880     | 425.2450         |
| 10 | 1168.595676        | 584.801476      | 1151.569127 | 576.288202       | 1150.585111    | 575.796193       | I    | <b>753.450518</b>  | 377.228897      | 736.423969  | 368.715623        | 735.439953     | 368.2236         |
| 11 | 1269.643355        | 635.325315      | 1252.616806 | 626.812041       | 1251.632790    | 626.320033       | T    | <b>640.366454</b>  | 320.686865      | 623.339905  | 312.173591        | 622.355889     | 311.6815         |
| 12 | 1370.691034        | 685.849155      | 1353.664485 | 677.335881       | 1352.680469    | 676.843872       | T    | <b>539.318775</b>  | 270.163026      | 522.292226  | 261.649751        | 521.308210     | 261.1577         |
| 13 | <b>1533.754363</b> | 767.380820      | 1516.727814 | 758.867545       | 1515.743798    | 758.375537       | Y    | 438.271096         | 219.639186      | 421.244547  | 211.125912        |                |                  |
| 14 | <b>1661.849326</b> | 831.428301      | 1644.822777 | 822.915027       | 1643.838761    | 822.423019       | K    | 275.207767         | 138.107521      | 258.181218  | 129.594247        |                |                  |
| 15 |                    |                 |             |                  |                |                  | K    | 147.112804         | 74.060040       | 130.086255  | 65.546765         |                |                  |

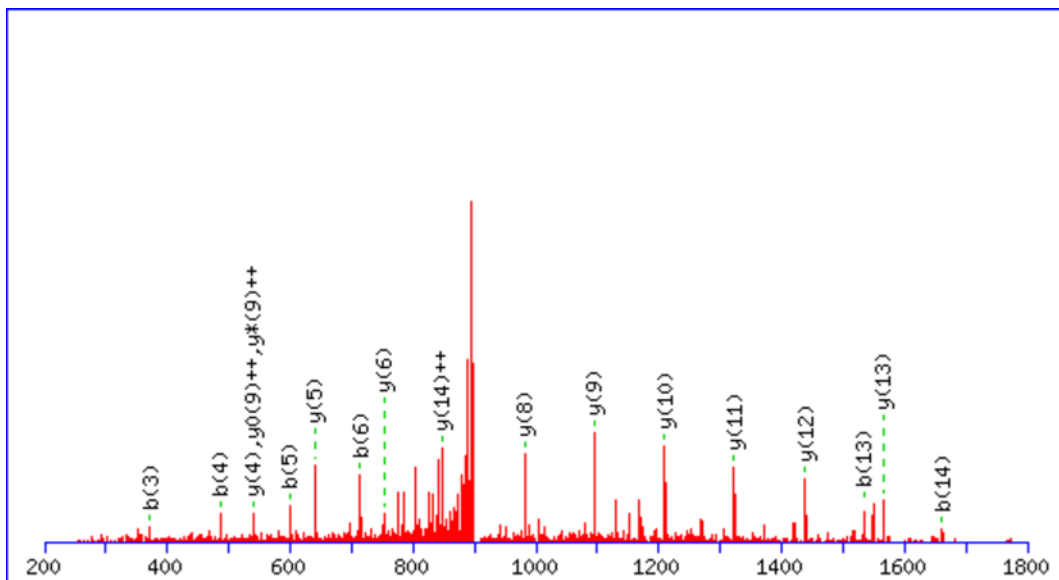

## Peptide View

MS/MS Fragmentation of **NPVLQQDAHSSVTITPQR**

Found in **IPI00410488**, Tax\_Id=9606 Gene\_Symbol=CD276 Isoform 1 of CD276 antigen

**Experiment:** 47 - PyA-2 **Fraction:** PyA-2

Match to Query 14401: 1990.026048 from(996.020300,2+)

Title: OECHL100312\_01.9458.9458.2.dta

Data file \\BOROMIR\Masse\Data LTQ-Orbitrap\Chrystelle Lacroix\Etude clinique sJPU\OECHL100312\_01.raw

**Monoisotopic mass of neutral peptide Mr(calc):** 1990.023209 **Fixed modifications:** Carbamidomethyl (C) (apply to specified residues or termini only) **Ions**

**Score:** 105 **Expect:** 4e-009 **Matches :** 37/186 fragment ions using 48 most intense peaks ([help](#))

| # | b                 | b <sup>++</sup> | b*                | b* <sup>++</sup> | b <sup>0</sup> | b <sup>0++</sup> | Seq. | y                  | y <sup>++</sup>   | y*          | y* <sup>++</sup>  | y <sup>0</sup> | y <sup>0++</sup> |
|---|-------------------|-----------------|-------------------|------------------|----------------|------------------|------|--------------------|-------------------|-------------|-------------------|----------------|------------------|
| 1 | 115.050203        | 58.028740       | 98.023654         | 49.515465        |                |                  | N    |                    |                   |             |                   |                |                  |
| 2 | 212.102967        | 106.555121      | 195.076418        | 98.041847        |                |                  | P    | 1876.987553        | 938.997415        | 1859.961004 | 930.484140        | 1858.976988    | 929.9921         |
| 3 | <b>311.171381</b> | 156.089328      | 294.144832        | 147.576054       |                |                  | V    | <b>1779.934789</b> | 890.471033        | 1762.908240 | 881.957758        | 1761.924224    | 881.4657         |
| 4 | 424.255445        | 212.631361      | 407.228896        | 204.118086       |                |                  | L    | <b>1680.866375</b> | <b>840.936826</b> | 1663.839826 | 832.423551        | 1662.855810    | 831.9315         |
| 5 | 552.314023        | 276.660650      | <b>535.287474</b> | 268.147375       |                |                  | Q    | <b>1567.782311</b> | 784.394794        | 1550.755762 | <b>775.881519</b> | 1549.771746    | <b>775.3895</b>  |

|    |                    |                   |                    |                   |                    |                   |   |                    |            |                   |            |             |          |
|----|--------------------|-------------------|--------------------|-------------------|--------------------|-------------------|---|--------------------|------------|-------------------|------------|-------------|----------|
| 6  | <b>680.372601</b>  | 340.689939        | <b>663.346052</b>  | 332.176664        |                    |                   | Q | <b>1439.723733</b> | 720.365505 | 1422.697184       | 711.852230 | 1421.713168 | 711.3602 |
| 7  | <b>795.399544</b>  | 398.203410        | 778.372995         | 389.690136        | 777.388979         | 389.198128        | D | <b>1311.665155</b> | 656.336215 | 1294.638606       | 647.822941 | 1293.654590 | 647.3309 |
| 8  | 866.436658         | 433.721967        | 849.410109         | 425.208693        | 848.426093         | 424.716685        | A | <b>1196.638212</b> | 598.822744 | 1179.611663       | 590.309470 | 1178.627647 | 589.8174 |
| 9  | 1003.495570        | <b>502.251423</b> | <b>986.469021</b>  | 493.738149        | 985.485005         | 493.246141        | H | <b>1125.601098</b> | 563.304187 | 1108.574549       | 554.790913 | 1107.590533 | 554.2989 |
| 10 | <b>1090.527598</b> | 545.767437        | 1073.501049        | 537.254163        | 1072.517033        | 536.762155        | S | <b>988.542186</b>  | 494.774731 | 971.515637        | 486.261457 | 970.531621  | 485.7694 |
| 11 | 1177.559626        | 589.283451        | 1160.533077        | 580.770177        | 1159.549061        | 580.278169        | S | 901.510158         | 451.258717 | 884.483609        | 442.745443 | 883.499593  | 442.2534 |
| 12 | <b>1276.628040</b> | 638.817658        | 1259.601491        | 630.304384        | 1258.617475        | 629.812376        | V | <b>814.478130</b>  | 407.742703 | 797.451581        | 399.229428 | 796.467565  | 398.7374 |
| 13 | <b>1377.675719</b> | 689.341498        | 1360.649170        | <b>680.828223</b> | 1359.665154        | <b>680.336215</b> | T | <b>715.409716</b>  | 358.208496 | 698.383167        | 349.695221 | 697.399151  | 349.2032 |
| 14 | <b>1490.759783</b> | 745.883530        | <b>1473.733234</b> | 737.370255        | <b>1472.749218</b> | 736.878247        | I | <b>614.362037</b>  | 307.684656 | 597.335488        | 299.171382 | 596.351472  | 298.6793 |
| 15 | <b>1591.807462</b> | 796.407369        | 1574.780913        | 787.894095        | 1573.796897        | 787.402087        | T | <b>501.277973</b>  | 251.142624 | 484.251424        | 242.629350 | 483.267408  | 242.1373 |
| 16 | <b>1688.860226</b> | 844.933751        | 1671.833677        | 836.420477        | 1670.849661        | 835.928469        | P | <b>400.230294</b>  | 200.618785 | <b>383.203745</b> | 192.105510 |             |          |
| 17 | <b>1816.918804</b> | 908.963040        | <b>1799.892255</b> | 900.449766        | 1798.908239        | 899.957758        | Q | 303.177530         | 152.092403 | 286.150981        | 143.579128 |             |          |
| 18 |                    |                   |                    |                   |                    |                   | R | 175.118952         | 88.063114  | 158.092403        | 79.549839  |             |          |

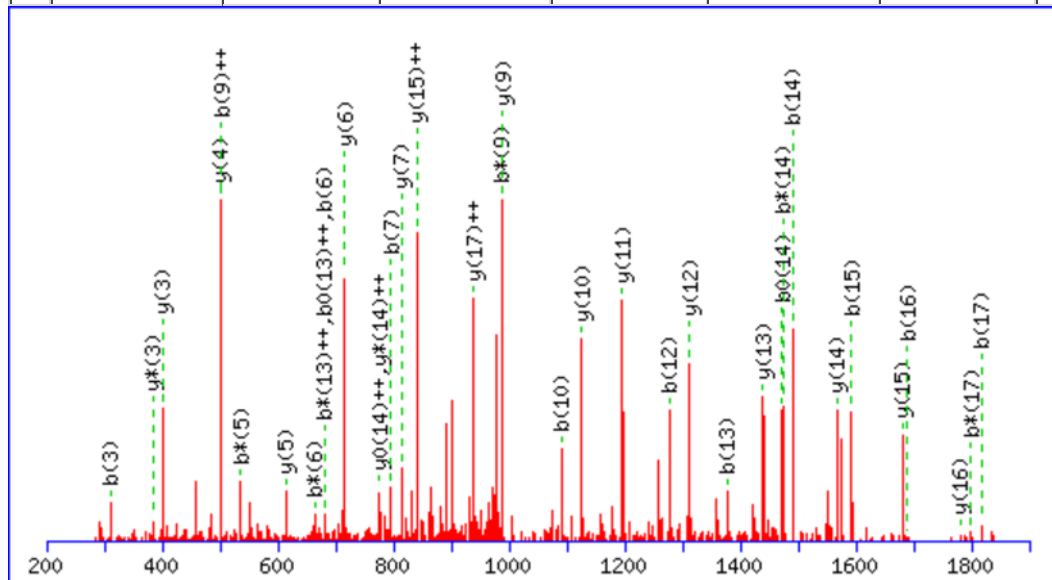

## Peptide View

MS/MS Fragmentation of **AHGQESAI FNEVAPGYFSR**Found in **IPI00170635**, Tax\_Id=9606 Gene\_Symbol=SECTM1 Secreted and transmembrane protein 1**Experiment:** 47 - PyA-2 **Fraction:** PyA-2

Match to Query 15008: 2078.983448 from(1040.499000,2+)

Title: OECHL100312\_01.16920.16920.2.dta

Data file \\BOROMIR\Masse\Data LTQ-Orbitrap\Chrystelle Lacroix\Etude clinique sJPU\OECHL100312\_01.raw

**Monoisotopic mass of neutral peptide Mr(calc):** 2078.980988**Fixed modifications:** Carbamidomethyl (C) (apply to specified residues or termini only)**Ions****Score:** 86 **Expect:** 4.5e-007**Matches :** 50/200 fragment ions using 99 most intense peaks ([help](#))

| #  | b           | b <sup>++</sup> | b*          | b <sup>*++</sup> | b <sup>0</sup> | b <sup>0++</sup> | Seq. | y           | y <sup>++</sup> | y*          | y <sup>*++</sup> | y <sup>0</sup> | y <sup>0++</sup> |
|----|-------------|-----------------|-------------|------------------|----------------|------------------|------|-------------|-----------------|-------------|------------------|----------------|------------------|
| 1  | 72.044390   | 36.525833       |             |                  |                |                  | A    |             |                 |             |                  |                |                  |
| 2  | 209.103302  | 105.055289      |             |                  |                |                  | H    | 2008.951166 | 1004.979221     | 1991.924617 | 996.465947       | 1990.940601    | 995.973          |
| 3  | 266.124766  | 133.566021      |             |                  |                |                  | G    | 1871.892254 | 936.449765      | 1854.865705 | 927.936491       | 1853.881689    | 927.444          |
| 4  | 394.183344  | 197.595310      | 377.156795  | 189.082035       |                |                  | Q    | 1814.870790 | 907.939033      | 1797.844241 | 899.425759       | 1796.860225    | 898.933          |
| 5  | 523.225937  | 262.116607      | 506.199388  | 253.603332       | 505.215372     | 253.111324       | E    | 1686.812212 | 843.909744      | 1669.785663 | 835.396470       | 1668.801647    | 834.904          |
| 6  | 610.257965  | 305.632621      | 593.231416  | 297.119346       | 592.247400     | 296.627338       | S    | 1557.769619 | 779.388448      | 1540.743070 | 770.875173       | 1539.759054    | 770.383          |
| 7  | 681.295079  | 341.151178      | 664.268530  | 332.637903       | 663.284514     | 332.145895       | A    | 1470.737591 | 735.872434      | 1453.711042 | 727.359159       | 1452.727026    | 726.867          |
| 8  | 794.379143  | 397.693210      | 777.352594  | 389.179935       | 776.368578     | 388.687927       | I    | 1399.700477 | 700.353877      | 1382.673928 | 691.840602       | 1381.689912    | 691.348          |
| 9  | 941.447557  | 471.227417      | 924.421008  | 462.714142       | 923.436992     | 462.222134       | F    | 1286.616413 | 643.811845      | 1269.589864 | 635.298570       | 1268.605848    | 634.806          |
| 10 | 1055.490484 | 528.248880      | 1038.463935 | 519.735606       | 1037.479919    | 519.243597       | N    | 1139.547999 | 570.277638      | 1122.521450 | 561.764363       | 1121.537434    | 561.272          |
| 11 | 1184.533077 | 592.770176      | 1167.506528 | 584.256902       | 1166.522512    | 583.764894       | E    | 1025.505072 | 513.256174      | 1008.478523 | 504.742900       | 1007.494507    | 504.250          |
| 12 | 1283.601491 | 642.304383      | 1266.574942 | 633.791109       | 1265.590926    | 633.299101       | V    | 896.462479  | 448.734878      | 879.435930  | 440.221603       | 878.451914     | 439.729          |
| 13 | 1354.638605 | 677.822940      | 1337.612056 | 669.309666       | 1336.628040    | 668.817658       | A    | 797.394065  | 399.200671      | 780.367516  | 390.687396       | 779.383500     | 390.195          |
| 14 | 1451.691369 | 726.349322      | 1434.664820 | 717.836048       | 1433.680804    | 717.344040       | P    | 726.356951  | 363.682114      | 709.330402  | 355.168839       | 708.346386     | 354.676          |
| 15 | 1508.712833 | 754.860054      | 1491.686284 | 746.346780       | 1490.702268    | 745.854772       | G    | 629.304187  | 315.155732      | 612.277638  | 306.642457       | 611.293622     | 306.150          |
| 16 | 1671.776162 | 836.391719      | 1654.749613 | 827.878445       | 1653.765597    | 827.386436       | Y    | 572.282723  | 286.645000      | 555.256174  | 278.131725       | 554.272158     | 277.639          |
| 17 | 1818.844576 | 909.925926      | 1801.818027 | 901.412652       | 1800.834011    | 900.920643       | F    | 409.219394  | 205.113335      | 392.192845  | 196.600061       | 391.208829     | 196.108          |
| 18 | 1905.876604 | 953.441940      | 1888.850055 | 944.928666       | 1887.866039    | 944.436658       | S    | 262.150980  | 131.579128      | 245.124431  | 123.065854       | 244.140415     | 122.573          |
| 19 |             |                 |             |                  |                |                  | R    | 175.118952  | 88.063114       | 158.092403  | 79.549840        |                |                  |

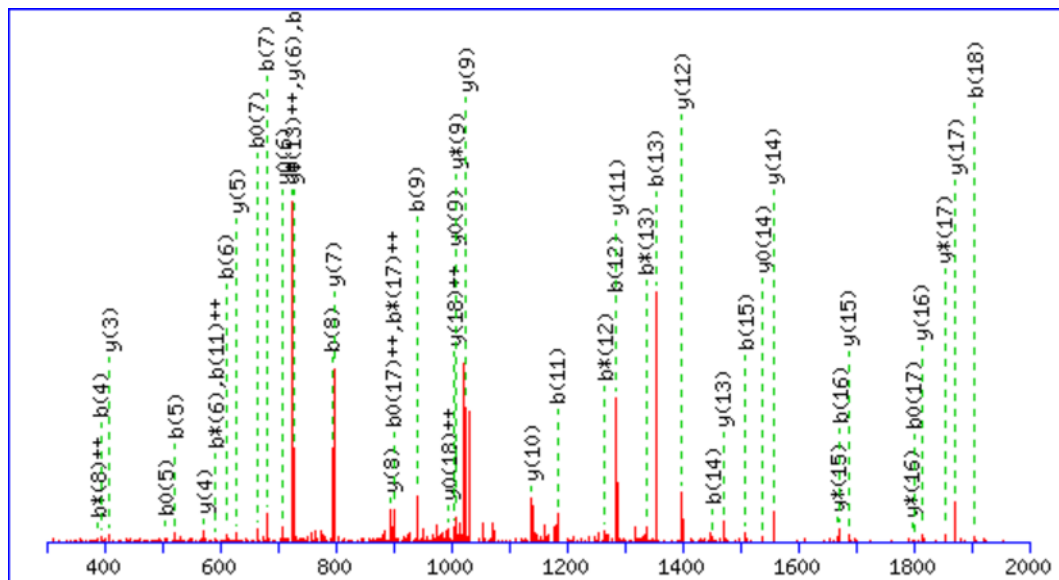

## Peptide View

### MS/MS Fragmentation of **CPLQDFLR**

Found in **IPI0003807**, Tax\_Id=9606 Gene\_Symbol=ACP2 Lysosomal acid phosphatase

**Experiment:** 47 - PyA-2 **Fraction:** PyA-2

Match to Query 3790: 1047.516848 from(524.765700,2+)

Title: OECHL100312\_01.16558.16558.2.dta

Data file \\BOROMIR\Masse\Data LTQ-Orbitrap\Chrystelle Lacroix\Etude clinique sJPU\OECHL100312\_01.raw

**Monoisotopic mass of neutral peptide Mr(calc):** 1047.517151 **Fixed modifications:** Carbamidomethyl (C) (apply to specified residues or termini only) **Ions**

**Score:** 71 **Expect:** 7.2e-006 **Matches :** 8/64 fragment ions using 9 most intense peaks ([help](#))

| # | b          | b <sup>++</sup> | b*         | b <sup>+++</sup> | b <sup>0</sup> | b <sup>0++</sup> | Seq. | y          | y <sup>++</sup> | y*         | y <sup>+++</sup> | y <sup>0</sup> | y <sup>0++</sup> | # |
|---|------------|-----------------|------------|------------------|----------------|------------------|------|------------|-----------------|------------|------------------|----------------|------------------|---|
| 1 | 161.037925 | 81.022600       |            |                  |                |                  | C    |            |                 |            |                  |                |                  | 8 |
| 2 | 258.090689 | 129.548982      |            |                  |                |                  | P    | 888.493779 | 444.750528      | 871.467230 | 436.237253       | 870.483214     | 435.745245       | 7 |
| 3 | 371.174753 | 186.091015      |            |                  |                |                  | L    | 791.441015 | 396.224146      | 774.414466 | 387.710871       | 773.430450     | 387.218863       | 6 |
| 4 | 499.233331 | 250.120304      | 482.206782 | 241.607029       |                |                  | Q    | 678.356951 | 339.682114      | 661.330402 | 331.168839       | 660.346386     | 330.676831       | 5 |
| 5 | 614.260274 | 307.633775      | 597.233725 | 299.120501       | 596.249709     | 298.628493       | D    | 550.298373 | 275.652825      | 533.271824 | 267.139550       | 532.287808     | 266.647542       | 4 |

|   |            |            |            |            |            |            |   |            |            |            |            |  |  |   |
|---|------------|------------|------------|------------|------------|------------|---|------------|------------|------------|------------|--|--|---|
| 6 | 761.328688 | 381.167982 | 744.302139 | 372.654708 | 743.318123 | 372.162700 | F | 435.271430 | 218.139353 | 418.244881 | 209.626079 |  |  | 3 |
| 7 | 874.412752 | 437.710014 | 857.386203 | 429.196740 | 856.402187 | 428.704732 | L | 288.203016 | 144.605146 | 271.176467 | 136.091872 |  |  | 2 |
| 8 |            |            |            |            |            |            | R | 175.118952 | 88.063114  | 158.092403 | 79.549840  |  |  | 1 |

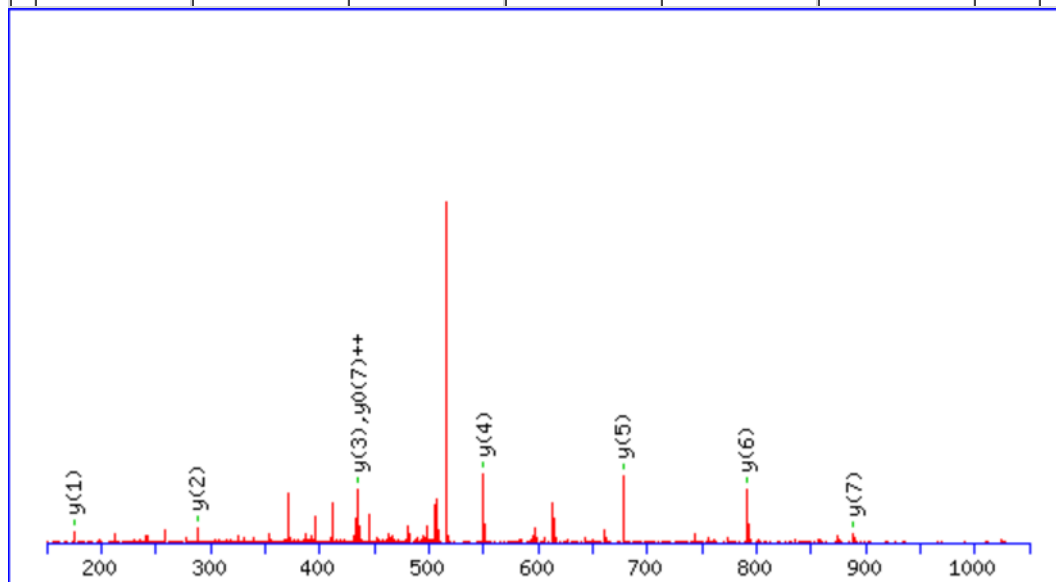

## Peptide View

MS/MS Fragmentation of **LVQELCSLK**

Found in **IPI00018275**, Tax\_Id=9606 Gene\_Symbol=PRND Prion-like protein doppel

**Experiment:** 47 - PyA-2 **Fraction:** PyA-2

Match to Query 4295: 1088.591248 from(545.302900,2+)

Title: OECHL100312\_01.11359.11359.2.dta

Data file \\BOROMIR\Masse\Data LTQ-Orbitrap\Chrystelle Lacroix\Etude clinique sJPU\OECHL100312\_01.raw

**Monoisotopic mass of neutral peptide Mr(calc):** 1088.589966 **Fixed modifications:** Carbamidomethyl (C) (apply to specified residues or termini only) **Ions**

**Score:** 54 **Expect:** 0.0003 **Matches :** 18/82 fragment ions using 27 most intense peaks ([help](#))

| # | b                 | b <sup>++</sup> | b* | b <sup>*++</sup> | b <sup>0</sup> | b <sup>0++</sup> | Seq. | y                 | y <sup>++</sup> | y*         | y <sup>*++</sup> | y <sup>0</sup> | y <sup>0++</sup> | # |
|---|-------------------|-----------------|----|------------------|----------------|------------------|------|-------------------|-----------------|------------|------------------|----------------|------------------|---|
| 1 | 114.091340        | 57.549308       |    |                  |                |                  | L    |                   |                 |            |                  |                |                  | 9 |
| 2 | <b>213.159754</b> | 107.083515      |    |                  |                |                  | V    | <b>976.513194</b> | 488.760235      | 959.486645 | 480.246961       | 958.502629     | 479.754953       | 8 |

|   |            |            |            |            |            |            |   |            |            |            |            |            |            |   |
|---|------------|------------|------------|------------|------------|------------|---|------------|------------|------------|------------|------------|------------|---|
| 3 | 341.218332 | 171.112804 | 324.191783 | 162.599529 |            |            | Q | 877.444780 | 439.226028 | 860.418231 | 430.712754 | 859.434215 | 430.220746 | 7 |
| 4 | 470.260925 | 235.634100 | 453.234376 | 227.120826 | 452.250360 | 226.628818 | E | 749.386202 | 375.196739 | 732.359653 | 366.683465 | 731.375637 | 366.191457 | 6 |
| 5 | 583.344989 | 292.176133 | 566.318440 | 283.662858 | 565.334424 | 283.170850 | L | 620.343609 | 310.675443 | 603.317060 | 302.162168 | 602.333044 | 301.670160 | 5 |
| 6 | 743.375638 | 372.191457 | 726.349089 | 363.678183 | 725.365073 | 363.186175 | C | 507.259545 | 254.133410 | 490.232996 | 245.620136 | 489.248980 | 245.128128 | 4 |
| 7 | 830.407666 | 415.707471 | 813.381117 | 407.194197 | 812.397101 | 406.702189 | S | 347.228896 | 174.118086 | 330.202347 | 165.604811 | 329.218331 | 165.112803 | 3 |
| 8 | 943.491730 | 472.249503 | 926.465181 | 463.736229 | 925.481165 | 463.244221 | L | 260.196868 | 130.602072 | 243.170319 | 122.088797 |            |            | 2 |
| 9 |            |            |            |            |            |            | K | 147.112804 | 74.060040  | 130.086255 | 65.546765  |            |            | 1 |

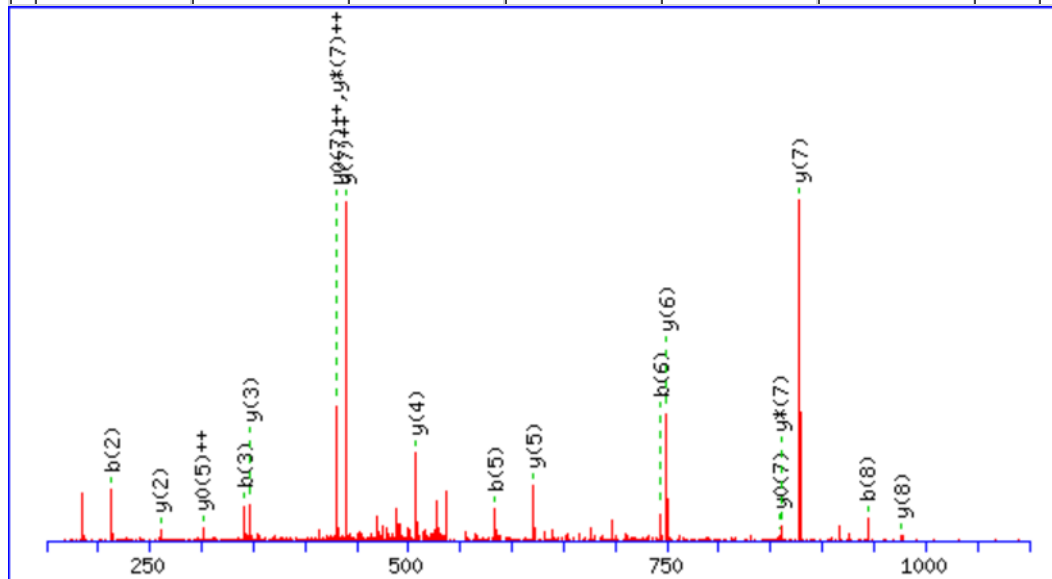

## Peptide View

MS/MS Fragmentation of **SKEDSNSTESKSSSEEDGQLK**

Found in **IPI00012734**, Tax\_Id=9606 Gene\_Symbol=DMP1 Isoform 1 of Dentin matrix acidic phosphoprotein 1

**Experiment:** 47 - PyA-2 **Fraction:** PyA-2

Match to Query 16056: 2270.999448 from(1136.507000,2+)

Title: OECHL100312\_01.2069.2069.2.dta

Data file \\BOROMIR\Masse\Data LTQ-Orbitrap\Chrystelle Lacroix\Etude clinique sJPU\OECHL100312\_01.raw

**Monoisotopic mass of neutral peptide Mr(calc):** 2270.998581 **Fixed modifications:** Carbamidomethyl (C) (apply to specified residues or termini only) **Ions**



Score: 77 Expect: 2e-006 Matches : 40/230 fragment ions using 85 most intense peaks ([help](#))

| #  | b                  | b <sup>++</sup>    | b*                 | b <sup>*++</sup>  | b <sup>0</sup>     | b <sup>0++</sup>  | Seq. | y                  | y <sup>++</sup>   | y*                | y <sup>*++</sup>  | y <sup>0</sup>     |                   |
|----|--------------------|--------------------|--------------------|-------------------|--------------------|-------------------|------|--------------------|-------------------|-------------------|-------------------|--------------------|-------------------|
| 1  | 88.039304          | 44.523290          |                    |                   | 70.028739          | 35.518008         | S    |                    |                   |                   |                   |                    |                   |
| 2  | 216.134267         | 108.570771         | 199.107718         | 100.057497        | 198.123702         | 99.565489         | K    | 2184.973868        | 1092.990572       | 2167.947319       | 1084.477297       | 2166.963303        | 1084.477297       |
| 3  | 345.176860         | 173.092068         | 328.150311         | 164.578793        | 327.166295         | 164.086785        | E    | 2056.878905        | 1028.943090       | 2039.852356       | 1020.429816       | 2038.868340        | 1020.429816       |
| 4  | <b>460.203803</b>  | 230.605539         | 443.177254         | 222.092265        | 442.193238         | 221.600257        | D    | <b>1927.836312</b> | <b>964.421794</b> | 1910.809763       | 955.908520        | 1909.825747        | 955.908520        |
| 5  | 547.235831         | 274.121554         | 530.209282         | 265.608279        | 529.225266         | 265.116271        | S    | <b>1812.809369</b> | <b>906.908323</b> | 1795.782820       | <b>898.395048</b> | 1794.798804        | <b>898.395048</b> |
| 6  | 661.278758         | 331.143017         | 644.252209         | 322.629743        | 643.268193         | 322.137735        | N    | 1725.777341        | 863.392309        | 1708.750792       | 854.879034        | 1707.766776        | 854.879034        |
| 7  | <b>748.310786</b>  | 374.659031         | <b>731.284237</b>  | 366.145757        | 730.300221         | <b>365.653749</b> | S    | <b>1611.734414</b> | 806.370845        | 1594.707865       | 797.857571        | 1593.723849        | 797.857571        |
| 8  | 849.358465         | 425.182871         | 832.331916         | 416.669596        | 831.347900         | 416.177588        | T    | <b>1524.702386</b> | 762.854831        | 1507.675837       | 754.341557        | <b>1506.691821</b> | 754.341557        |
| 9  | <b>978.401058</b>  | 489.704167         | 961.374509         | 481.190893        | 960.390493         | 480.698885        | E    | <b>1423.654707</b> | 712.330992        | 1406.628158       | 703.817717        | <b>1405.644142</b> | 703.817717        |
| 10 | 1065.433086        | 533.220181         | 1048.406537        | 524.706907        | 1047.422521        | 524.214899        | S    | <b>1294.612114</b> | 647.809695        | 1277.585565       | 639.296421        | 1276.601549        | 639.296421        |
| 11 | <b>1193.528049</b> | 597.267663         | 1176.501500        | 588.754388        | 1175.517484        | 588.262380        | K    | <b>1207.580086</b> | 604.293681        | 1190.553537       | 595.780407        | 1189.569521        | 595.780407        |
| 12 | 1280.560077        | 640.783677         | 1263.533528        | 632.270402        | 1262.549512        | 631.778394        | S    | <b>1079.485123</b> | 540.246200        | 1062.458574       | 531.732925        | 1061.474558        | 531.732925        |
| 13 | <b>1367.592105</b> | 684.299691         | 1350.565556        | 675.786416        | <b>1349.581540</b> | 675.294408        | S    | <b>992.453095</b>  | 496.730186        | 975.426546        | 488.216911        | 974.442530         | 488.216911        |
| 14 | 1454.624133        | 727.815705         | 1437.597584        | 719.302430        | 1436.613568        | 718.810422        | S    | <b>905.421067</b>  | 453.214172        | 888.394518        | 444.700897        | 887.410502         | 444.700897        |
| 15 | <b>1583.666726</b> | 792.337001         | 1566.640177        | 783.823727        | 1565.656161        | 783.331719        | E    | <b>818.389039</b>  | 409.698158        | 801.362490        | 401.184883        | 800.378474         | 401.184883        |
| 16 | <b>1712.709319</b> | 856.858298         | 1695.682770        | 848.345023        | 1694.698754        | 847.853015        | E    | <b>689.346446</b>  | 345.176861        | 672.319897        | 336.663587        | <b>671.335881</b>  | 336.663587        |
| 17 | <b>1827.736262</b> | <b>914.371769</b>  | <b>1810.709713</b> | <b>905.858495</b> | 1809.725697        | <b>905.366487</b> | D    | <b>560.303853</b>  | 280.655565        | <b>543.277304</b> | 272.142290        | 542.293288         | 272.142290        |
| 18 | 1884.757726        | 942.882501         | 1867.731177        | 934.369227        | 1866.747161        | 933.877219        | G    | <b>445.276910</b>  | 223.142093        | 428.250361        | 214.628818        |                    |                   |
| 19 | 2012.816304        | <b>1006.911790</b> | 1995.789755        | 998.398516        | 1994.805739        | 997.906508        | Q    | <b>388.255446</b>  | 194.631361        | 371.228897        | 186.118087        |                    |                   |
| 20 | 2125.900368        | <b>1063.453822</b> | 2108.873819        | 1054.940547       | 2107.889803        | 1054.448539       | L    | 260.196868         | 130.602072        | 243.170319        | 122.088798        |                    |                   |
| 21 |                    |                    |                    |                   |                    |                   | K    | 147.112804         | 74.060040         | 130.086255        | 65.546765         |                    |                   |

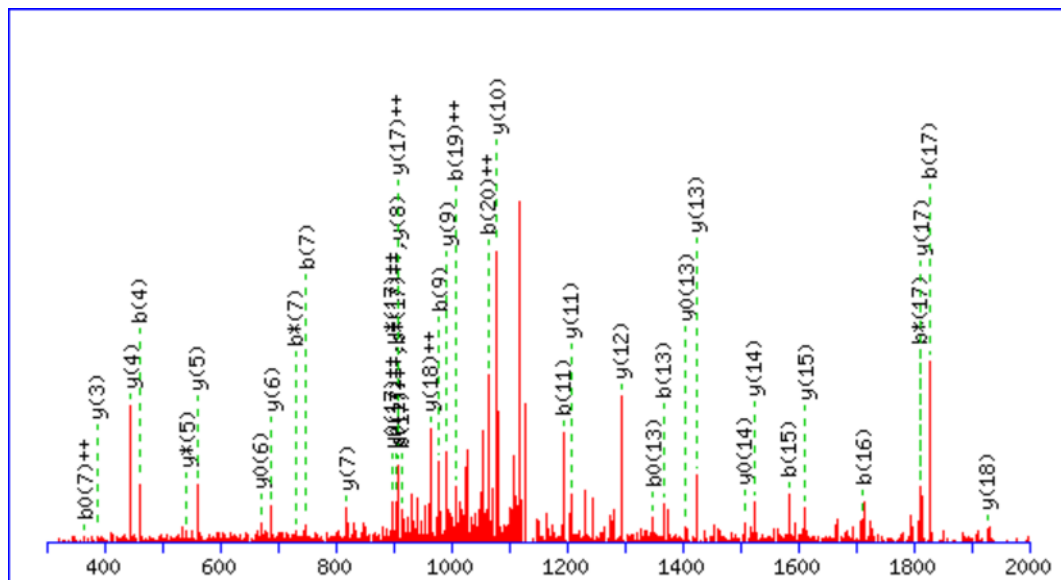

## Peptide View

MS/MS Fragmentation of **DFSLTSSSQTPGATK**

Found in **IPI00291300**, Tax\_Id=9606 Gene\_Symbol=PODXL2 Putative uncharacterized protein PODXL2

**Experiment:** 47 - PyA-2 **Fraction:** PyA-2

Match to Query 9986: 1525.728248 from(763.871400,2+)

Title: OECHL100312\_01.10402.10402.2.dta

Data file \\BOROMIR\Masse\Data LTQ-Orbitrap\Chrystelle Lacroix\Etude clinique sJPU\OECHL100312\_01.raw

**Monoisotopic mass of neutral peptide Mr(calc):** 1525.726028 **Fixed modifications:** Carbamidomethyl (C) (apply to specified residues or termini only) **Ions**

**Score:** 65 **Expect:** 3.6e-005 **Matches :** 43/150 fragment ions using 88 most intense peaks ([help](#))

| # | b                 | b <sup>++</sup> | b* | b <sup>*++</sup> | b <sup>0</sup>    | b <sup>0++</sup> | Seq.     | y                  | y <sup>++</sup>   | y*          | y <sup>*++</sup>  | y <sup>0</sup> | y <sup>0++</sup> |
|---|-------------------|-----------------|----|------------------|-------------------|------------------|----------|--------------------|-------------------|-------------|-------------------|----------------|------------------|
| 1 | 116.034219        | 58.520748       |    |                  | 98.023654         | 49.515465        | <b>D</b> |                    |                   |             |                   |                |                  |
| 2 | <b>263.102633</b> | 132.054954      |    |                  | 245.092068        | 123.049672       | <b>F</b> | 1411.706351        | 706.356813        | 1394.679802 | 697.843539        | 1393.695786    | 697.3515         |
| 3 | <b>350.134661</b> | 175.570968      |    |                  | <b>332.124096</b> | 166.565686       | <b>S</b> | <b>1264.637937</b> | <b>632.822607</b> | 1247.611388 | <b>624.309332</b> | 1246.627372    | <b>623.8173</b>  |
| 4 | 463.218725        | 232.113001      |    |                  | <b>445.208160</b> | 223.107718       | <b>L</b> | <b>1177.605909</b> | 589.306592        | 1160.579360 | 580.793318        | 1159.595344    | 580.3013         |
| 5 | <b>564.266404</b> | 282.636840      |    |                  | <b>546.255839</b> | 273.631558       | <b>T</b> | <b>1064.521845</b> | <b>532.764561</b> | 1047.495296 | 524.251286        | 1046.511280    | 523.7592         |

|    |                    |                   |                    |                   |                    |                   |            |   |                   |            |                   |                   |                   |                 |
|----|--------------------|-------------------|--------------------|-------------------|--------------------|-------------------|------------|---|-------------------|------------|-------------------|-------------------|-------------------|-----------------|
| 6  | <b>651.298432</b>  | 326.152854        |                    |                   |                    | <b>633.287867</b> | 317.147572 | S | <b>963.474166</b> | 482.240721 | <b>946.447617</b> | <b>473.727446</b> | 945.463601        | <b>473.2354</b> |
| 7  | 738.330460         | 369.668868        |                    |                   |                    | <b>720.319895</b> | 360.663586 | S | <b>876.442138</b> | 438.724707 | 859.415589        | 430.211432        | <b>858.431573</b> | 429.7194        |
| 8  | 825.362488         | 413.184882        |                    |                   |                    | 807.351923        | 404.179599 | S | <b>789.410110</b> | 395.208693 | 772.383561        | 386.695418        | 771.399545        | 386.2034        |
| 9  | <b>953.421066</b>  | <b>477.214171</b> | 936.394517         | 468.700897        |                    | <b>935.410501</b> | 468.208889 | Q | <b>702.378082</b> | 351.692679 | 685.351533        | 343.179404        | 684.367517        | 342.6873        |
| 10 | <b>1054.468745</b> | 527.738010        | 1037.442196        | <b>519.224736</b> | <b>1036.458180</b> | 518.732728        |            | T | <b>574.319504</b> | 287.663390 | 557.292955        | 279.150115        | 556.308939        | 278.6581        |
| 11 | 1151.521509        | 576.264392        | 1134.494960        | 567.751118        | 1133.510944        | 567.259110        |            | P | <b>473.271825</b> | 237.139550 | 456.245276        | 228.626276        | <b>455.261260</b> | 228.1342        |
| 12 | <b>1208.542973</b> | 604.775124        | 1191.516424        | 596.261850        | 1190.532408        | 595.769842        |            | G | <b>376.219061</b> | 188.613168 | 359.192512        | 180.099894        | 358.208496        | 179.6078        |
| 13 | <b>1279.580087</b> | 640.293681        | <b>1262.553538</b> | 631.780407        | <b>1261.569522</b> | 631.288399        |            | A | <b>319.197597</b> | 160.102436 | 302.171048        | 151.589162        | 301.187032        | 151.0971        |
| 14 | <b>1380.627766</b> | 690.817521        | <b>1363.601217</b> | 682.304246        | <b>1362.617201</b> | 681.812238        |            | T | <b>248.160483</b> | 124.583879 | 231.133934        | 116.070605        | 230.149918        | 115.5785        |
| 15 |                    |                   |                    |                   |                    |                   |            | K | 147.112804        | 74.060040  | 130.086255        | 65.546765         |                   |                 |

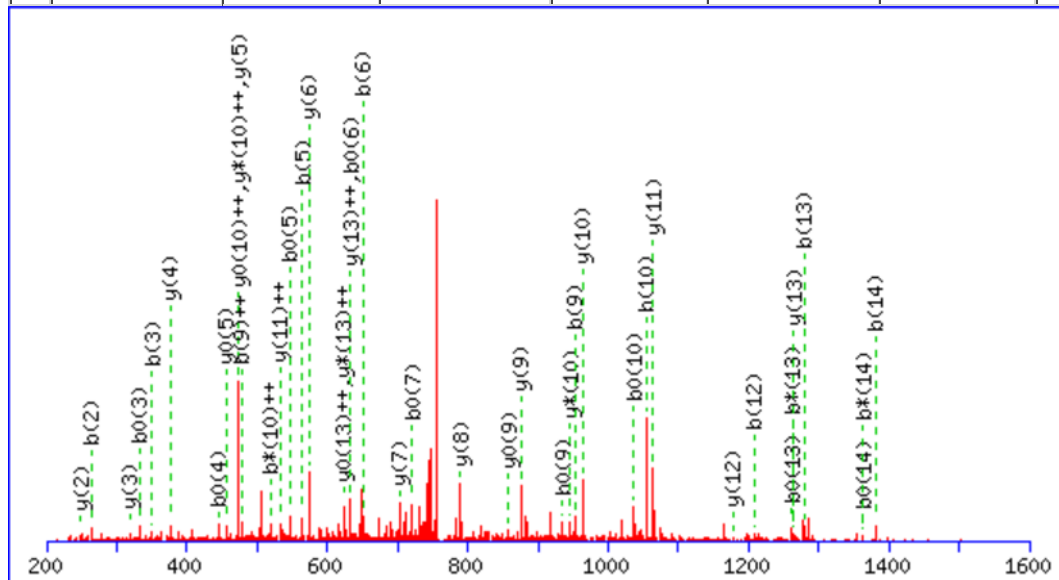

## Peptide View

MS/MS Fragmentation of **HSFKGEECPAGSHR**

Found in **IPI00021970**, Tax\_Id=9606 Gene\_Symbol=MGC31957;TNFRSF10C TNFRSF10C protein

Experiment: 47 - PyA-2 Fraction: PyA-2

Match to Query 10739: 1597.705848 from(799.860200,2+)

Title: OECHL100312\_01.2072.2072.2.dta

Data file \\BOROMIR\Masse\Data LTQ-Orbitrap\Chrystelle Lacroix\Etude clinique sJPU\OECHL100312\_01.raw

**Monoisotopic mass of neutral peptide Mr(calc): 1597.705566****Fixed modifications:** Carbamidomethyl (C) (apply to specified residues or termini only)**Ions****Score: 67** **Expect: 1.2e-005****Matches : 26/144** fragment ions using 42 most intense peaks ([help](#))

| #  | b                  | b <sup>++</sup> | b*          | b* <sup>++</sup> | b <sup>0</sup>    | b <sup>0++</sup> | Seq. | y                  | y <sup>++</sup>   | y*          | y* <sup>++</sup> | y <sup>0</sup> | y <sup>0++</sup> |
|----|--------------------|-----------------|-------------|------------------|-------------------|------------------|------|--------------------|-------------------|-------------|------------------|----------------|------------------|
| 1  | 138.066188         | 69.536732       |             |                  |                   |                  | H    |                    |                   |             |                  |                |                  |
| 2  | <b>225.098216</b>  | 113.052746      |             |                  | 207.087651        | 104.047463       | S    | <b>1461.653938</b> | <b>731.330607</b> | 1444.627389 | 722.817333       | 1443.643373    | 722.3253         |
| 3  | <b>372.166630</b>  | 186.586953      |             |                  | <b>354.156065</b> | 177.581671       | F    | <b>1374.621910</b> | <b>687.814593</b> | 1357.595361 | 679.301319       | 1356.611345    | 678.8093         |
| 4  | <b>500.261593</b>  | 250.634435      | 483.235044  | 242.121160       | <b>482.251028</b> | 241.629152       | K    | <b>1227.553496</b> | <b>614.280386</b> | 1210.526947 | 605.767112       | 1209.542931    | 605.2751         |
| 5  | 557.283057         | 279.145167      | 540.256508  | 270.631892       | <b>539.272492</b> | 270.139884       | G    | <b>1099.458533</b> | 550.232905        | 1082.431984 | 541.719630       | 1081.447968    | 541.2276         |
| 6  | <b>686.325650</b>  | 343.666463      | 669.299101  | 335.153189       | 668.315085        | 334.661181       | E    | 1042.437069        | 521.722173        | 1025.410520 | 513.208898       | 1024.426504    | 512.7168         |
| 7  | 815.368243         | 408.187760      | 798.341694  | 399.674485       | 797.357678        | 399.182477       | E    | <b>913.394476</b>  | 457.200876        | 896.367927  | 448.687602       | 895.383911     | 448.1955         |
| 8  | <b>975.398892</b>  | 488.203084      | 958.372343  | 479.689810       | <b>957.388327</b> | 479.197802       | C    | 784.351883         | 392.679580        | 767.325334  | 384.166305       | 766.341318     | 383.6742         |
| 9  | 1072.451656        | 536.729466      | 1055.425107 | 528.216192       | 1054.441091       | 527.724184       | P    | <b>624.321234</b>  | <b>312.664255</b> | 607.294685  | 304.150981       | 606.310669     | 303.6589         |
| 10 | <b>1143.488770</b> | 572.248023      | 1126.462221 | 563.734749       | 1125.478205       | 563.242741       | A    | <b>527.268470</b>  | 264.137873        | 510.241921  | 255.624598       | 509.257905     | 255.1325         |
| 11 | <b>1200.510234</b> | 600.758755      | 1183.483685 | 592.245481       | 1182.499669       | 591.753473       | G    | <b>456.231356</b>  | 228.619316        | 439.204807  | 220.106041       | 438.220791     | 219.6140         |
| 12 | <b>1287.542262</b> | 644.274769      | 1270.515713 | 635.761495       | 1269.531697       | 635.269487       | S    | 399.209892         | 200.108584        | 382.183343  | 191.595309       | 381.199327     | 191.1033         |
| 13 | <b>1424.601174</b> | 712.804225      | 1407.574625 | 704.290951       | 1406.590609       | 703.798943       | H    | <b>312.177864</b>  | 156.592570        | 295.151315  | 148.079295       |                |                  |
| 14 |                    |                 |             |                  |                   |                  | R    | 175.118952         | 88.063114         | 158.092403  | 79.549839        |                |                  |

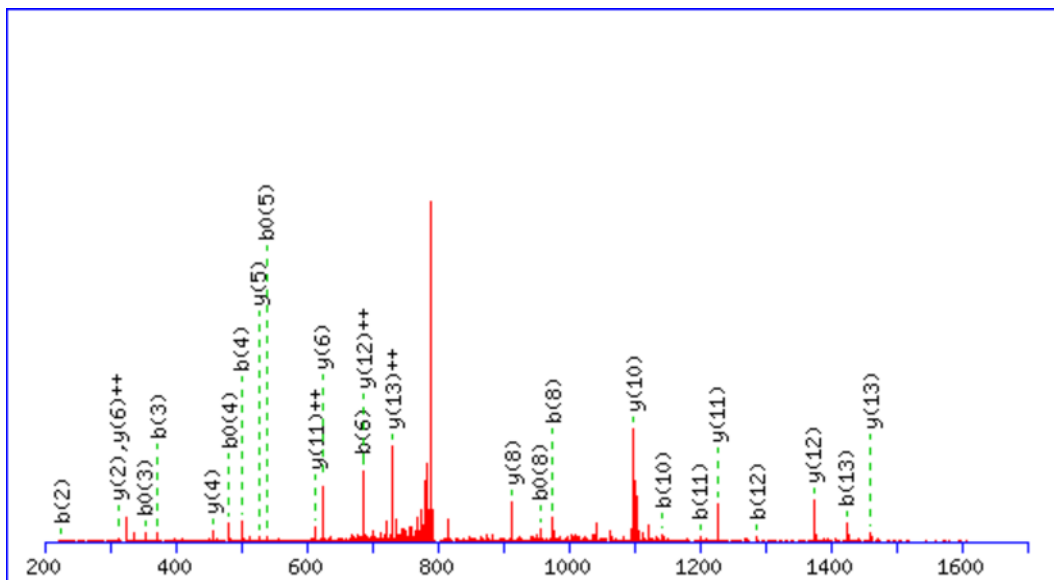

## Peptide View

MS/MS Fragmentation of **QLGPQPQDIYYEDGVVPTDRR**

Found in **IPI00015199**, Tax\_Id=9606 Gene\_Symbol=CD7 T-cell antigen CD7

**Experiment:** 47 - PyA-2 **Fraction:** PyA-2

Match to Query 17782: 2659.330872 from(887.450900,3+)

Title: OECHL100312\_01.17152.17152.3.dta

Data file \\BOROMIR\Masse\Data LTQ-Orbitrap\Chrystelle Lacroix\Etude clinique sJPU\OECHL100312\_01.raw

**Monoisotopic mass of neutral peptide Mr(calc):** 2659.324203 **Fixed modifications:** Carbamidomethyl (C) (apply to specified residues or termini only) **Ions**

**Score:** 68 **Expect:** 2.8e-005 **Matches :** 51/246 fragment ions using 118 most intense peaks ([help](#))

| # | b          | b <sup>++</sup> | b <sup>*</sup> | b <sup>*++</sup> | b <sup>0</sup> | b <sup>0++</sup> | Seq. | y           | y <sup>++</sup> | y <sup>*</sup> | y <sup>*++</sup> | y <sup>0</sup> |     |
|---|------------|-----------------|----------------|------------------|----------------|------------------|------|-------------|-----------------|----------------|------------------|----------------|-----|
| 1 | 129.065854 | 65.036565       | 112.039305     | 56.523291        |                |                  | Q    |             |                 |                |                  |                |     |
| 2 | 242.149918 | 121.578597      | 225.123369     | 113.065323       |                |                  | L    | 2532.272897 | 1266.640086     | 2515.246348    | 1258.126812      | 2514.262332    | 12: |
| 3 | 299.171382 | 150.089329      | 282.144833     | 141.576055       |                |                  | G    | 2419.188833 | 1210.098054     | 2402.162284    | 1201.584780      | 2401.178268    | 12: |
| 4 | 396.224146 | 198.615711      | 379.197597     | 190.102436       |                |                  | P    | 2362.167369 | 1181.587322     | 2345.140820    | 1173.074048      | 2344.156804    | 11: |
| 5 | 524.282724 | 262.645000      | 507.256175     | 254.131726       |                |                  | Q    | 2265.114605 | 1133.060940     | 2248.088056    | 1124.547666      | 2247.104040    | 11: |

|    |             |             |             |             |             |             |   |             |             |             |             |             |    |
|----|-------------|-------------|-------------|-------------|-------------|-------------|---|-------------|-------------|-------------|-------------|-------------|----|
| 6  | 621.335488  | 311.171382  | 604.308939  | 302.658108  |             |             | P | 2137.056027 | 1069.031651 | 2120.029478 | 1060.518377 | 2119.045462 | 10 |
| 7  | 749.394066  | 375.200671  | 732.367517  | 366.687397  |             |             | Q | 2040.003263 | 1020.505269 | 2022.976714 | 1011.991995 | 2021.992698 | 10 |
| 8  | 864.421009  | 432.714143  | 847.394460  | 424.200868  | 846.410444  | 423.708860  | D | 1911.944685 | 956.475980  | 1894.918136 | 947.962706  | 1893.934120 | 9  |
| 9  | 977.505073  | 489.256175  | 960.478524  | 480.742900  | 959.494508  | 480.250892  | I | 1796.917742 | 898.962509  | 1779.891193 | 890.449234  | 1778.907177 | 8  |
| 10 | 1090.589137 | 545.798206  | 1073.562588 | 537.284932  | 1072.578572 | 536.792924  | I | 1683.833678 | 842.420477  | 1666.807129 | 833.907202  | 1665.823113 | 8  |
| 11 | 1253.652466 | 627.329871  | 1236.625917 | 618.816597  | 1235.641901 | 618.324589  | Y | 1570.749614 | 785.878445  | 1553.723065 | 777.365170  | 1552.739049 | 7  |
| 12 | 1416.715795 | 708.861536  | 1399.689246 | 700.348261  | 1398.705230 | 699.856253  | Y | 1407.686285 | 704.346780  | 1390.659736 | 695.833506  | 1389.675720 | 6  |
| 13 | 1545.758388 | 773.382832  | 1528.731839 | 764.869558  | 1527.747823 | 764.377549  | E | 1244.622956 | 622.815116  | 1227.596407 | 614.301841  | 1226.612391 | 6  |
| 14 | 1660.785331 | 830.896304  | 1643.758782 | 822.383029  | 1642.774766 | 821.891021  | D | 1115.580363 | 558.293819  | 1098.553814 | 549.780545  | 1097.569798 | 5  |
| 15 | 1717.806795 | 859.407036  | 1700.780246 | 850.893761  | 1699.796230 | 850.401753  | G | 1000.553420 | 500.780348  | 983.526871  | 492.267073  | 982.542855  | 4  |
| 16 | 1816.875209 | 908.941243  | 1799.848660 | 900.427968  | 1798.864644 | 899.935960  | V | 943.531956  | 472.269616  | 926.505407  | 463.756341  | 925.521391  | 4  |
| 17 | 1915.943623 | 958.475450  | 1898.917074 | 949.962175  | 1897.933058 | 949.470167  | V | 844.463542  | 422.735409  | 827.436993  | 414.222134  | 826.452977  | 4  |
| 18 | 2012.996387 | 1007.001832 | 1995.969838 | 998.488557  | 1994.985822 | 997.996549  | P | 745.395128  | 373.201202  | 728.368579  | 364.687927  | 727.384563  | 3  |
| 19 | 2114.044066 | 1057.525671 | 2097.017517 | 1049.012396 | 2096.033501 | 1048.520388 | T | 648.342364  | 324.674820  | 631.315815  | 316.161545  | 630.331799  | 3  |
| 20 | 2215.091745 | 1108.049510 | 2198.065196 | 1099.536236 | 2197.081180 | 1099.044228 | T | 547.294685  | 274.150980  | 530.268136  | 265.637706  | 529.284120  | 2  |
| 21 | 2330.118688 | 1165.562982 | 2313.092139 | 1157.049707 | 2312.108123 | 1156.557699 | D | 446.247006  | 223.627141  | 429.220457  | 215.113866  | 428.236441  | 2  |
| 22 | 2486.219799 | 1243.613537 | 2469.193250 | 1235.100263 | 2468.209234 | 1234.608255 | R | 331.220063  | 166.113669  | 314.193514  | 157.600395  |             |    |
| 23 |             |             |             |             |             |             | R | 175.118952  | 88.063114   | 158.092403  | 79.549839   |             |    |

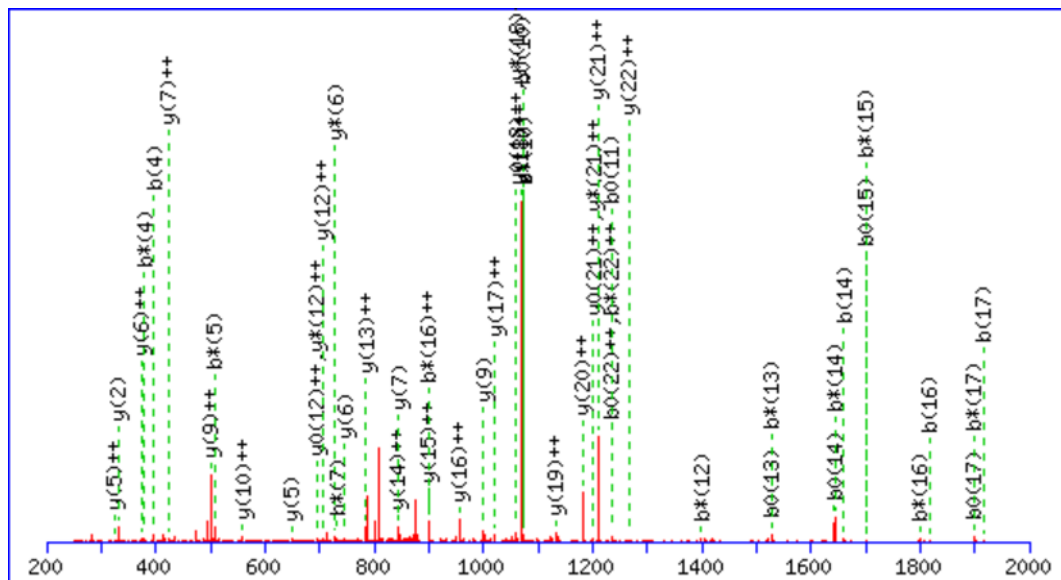

## Peptide View

MS/MS Fragmentation of **YSGSEGSTQLTKGELK**

Found in **IPI00017526**, Tax\_Id=9606 Gene\_Symbol=S100P Protein S100-P

**Experiment:** 47 - PyA-2 **Fraction:** PyA-2

Match to Query 12826: 1784.882848 from(893.448700,2+)

Title: OECHL100312\_01.7158.7158.2.dta

Data file \\BOROMIR\Masse\Data LTQ-Orbitrap\Chrystelle Lacroix\Etude clinique sJPU\OECHL100312\_01.raw

**Monoisotopic mass of neutral peptide Mr(calc):** 1784.879211 **Fixed modifications:** Carbamidomethyl (C) (apply to specified residues or termini only) **Ions**

**Score:** 67 **Expect:** 3e-005 **Matches :** 17/170 fragment ions using 31 most intense peaks ([help](#))

| # | b          | b <sup>++</sup> | b* | b <sup>*++</sup> | b <sup>0</sup> | b <sup>0++</sup> | Seq. | y           | y <sup>++</sup> | y*          | y <sup>*++</sup> | y <sup>0</sup> | y <sup>0++</sup> |
|---|------------|-----------------|----|------------------|----------------|------------------|------|-------------|-----------------|-------------|------------------|----------------|------------------|
| 1 | 164.070605 | 82.538940       |    |                  |                |                  | Y    |             |                 |             |                  |                |                  |
| 2 | 251.102633 | 126.054954      |    |                  | 233.092068     | 117.049672       | S    | 1622.823172 | 811.915224      | 1605.796623 | 803.401950       | 1604.812607    | 802.9099         |
| 3 | 308.124097 | 154.565687      |    |                  | 290.113532     | 145.560404       | G    | 1535.791144 | 768.399210      | 1518.764595 | 759.885936       | 1517.780579    | 759.3939         |
| 4 | 395.156125 | 198.081701      |    |                  | 377.145560     | 189.076418       | S    | 1478.769680 | 739.888478      | 1461.743131 | 731.375204       | 1460.759115    | 730.8831         |
| 5 | 524.198718 | 262.602997      |    |                  | 506.188153     | 253.597715       | E    | 1391.737652 | 696.372464      | 1374.711103 | 687.859190       | 1373.727087    | 687.3671         |

|    |                    |            |             |            |             |                   |   |                    |                   |                    |            |             |          |
|----|--------------------|------------|-------------|------------|-------------|-------------------|---|--------------------|-------------------|--------------------|------------|-------------|----------|
| 6  | 581.220182         | 291.113729 |             |            | 563.209617  | 282.108447        | G | <b>1262.695059</b> | <b>631.851167</b> | 1245.668510        | 623.337893 | 1244.684494 | 622.8458 |
| 7  | 668.252210         | 334.629743 |             |            | 650.241645  | <b>325.624461</b> | S | <b>1205.673595</b> | 603.340436        | 1188.647046        | 594.827161 | 1187.663030 | 594.3351 |
| 8  | 769.299889         | 385.153583 |             |            | 751.289324  | 376.148300        | T | <b>1118.641567</b> | 559.824421        | 1101.615018        | 551.311147 | 1100.631002 | 550.8191 |
| 9  | 897.358467         | 449.182872 | 880.331918  | 440.669597 | 879.347902  | 440.177589        | Q | <b>1017.593888</b> | 509.300582        | <b>1000.567339</b> | 500.787307 | 999.583323  | 500.2952 |
| 10 | 998.406146         | 499.706711 | 981.379597  | 491.193437 | 980.395581  | 490.701429        | T | 889.535310         | 445.271293        | 872.508761         | 436.758018 | 871.524745  | 436.2660 |
| 11 | 1111.490210        | 556.248743 | 1094.463661 | 547.735469 | 1093.479645 | 547.243461        | L | <b>788.487631</b>  | 394.747453        | 771.461082         | 386.234179 | 770.477066  | 385.7421 |
| 12 | 1212.537889        | 606.772583 | 1195.511340 | 598.259308 | 1194.527324 | 597.767300        | T | <b>675.403567</b>  | 338.205421        | 658.377018         | 329.692147 | 657.393002  | 329.2001 |
| 13 | 1340.632852        | 670.820064 | 1323.606303 | 662.306790 | 1322.622287 | 661.814782        | K | <b>574.355888</b>  | 287.681582        | 557.329339         | 279.168307 | 556.345323  | 278.6762 |
| 14 | 1397.654316        | 699.330796 | 1380.627767 | 690.817522 | 1379.643751 | 690.325514        | G | <b>446.260925</b>  | 223.634100        | 429.234376         | 215.120826 | 428.250360  | 214.6288 |
| 15 | <b>1526.696909</b> | 763.852093 | 1509.670360 | 755.338818 | 1508.686344 | 754.846810        | E | 389.239461         | 195.123368        | 372.212912         | 186.610094 | 371.228896  | 186.1180 |
| 16 | <b>1639.780973</b> | 820.394124 | 1622.754424 | 811.880850 | 1621.770408 | 811.388842        | L | <b>260.196868</b>  | 130.602072        | 243.170319         | 122.088797 |             |          |
| 17 |                    |            |             |            |             |                   | K | 147.112804         | 74.060040         | 130.086255         | 65.546765  |             |          |

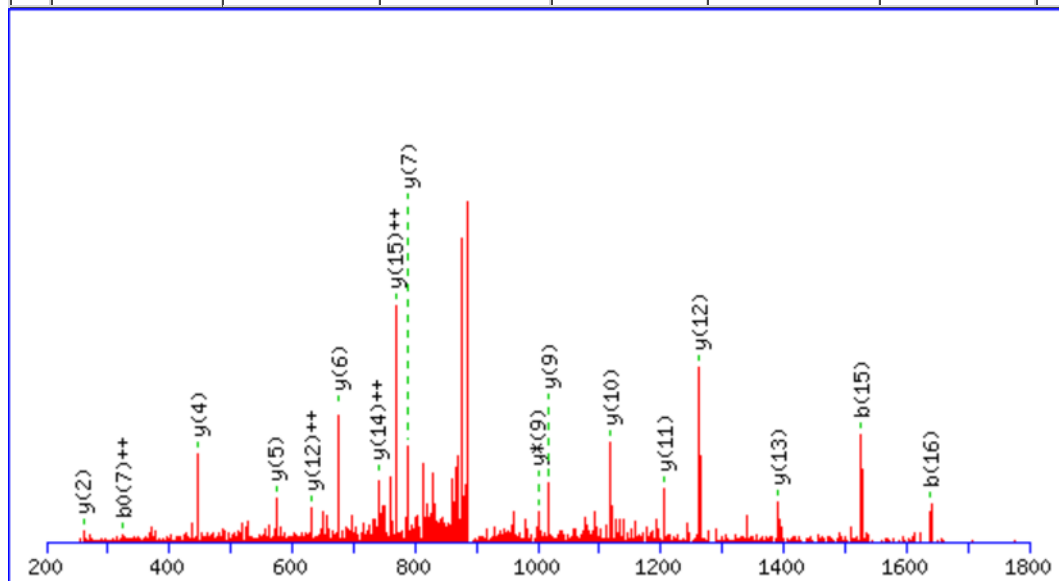

## Peptide View

MS/MS Fragmentation of **ASLQHGQAAEKPHR**



Found in **IPI00165044**, Tax\_Id=9606 Gene\_Symbol=FAM198B Isoform 2 of Protein ENED

**Experiment:** 47 - PyA-2 **Fraction:** PyA-2

Match to Query 10641: 1585.808848 from(793.911700,2+)

Title: OECHL100312\_01.1701.1701.2.dta

Data file \\BOROMIR\Masse\Data LTQ-Orbitrap\Chrystelle Lacroix\Etude clinique sJPU\OECHL100312\_01.raw

**Monoisotopic mass of neutral peptide Mr(calc):** 1585.807312**Fixed modifications:** Carbamidomethyl (C) (apply to specified residues or termini only)**Ions**

**Score:** 70 **Expect:** 1.2e-005**Matches :** 14/150 fragment ions using 14 most intense peaks ([help](#))

| #  | b                  | b <sup>++</sup> | b*          | b* <sup>++</sup> | b <sup>0</sup> | b <sup>0++</sup> | Seq. | y                  | y <sup>++</sup>   | y*          | y* <sup>++</sup>  | y <sup>0</sup> | y <sup>0++</sup> |
|----|--------------------|-----------------|-------------|------------------|----------------|------------------|------|--------------------|-------------------|-------------|-------------------|----------------|------------------|
| 1  | 72.044390          | 36.525833       |             |                  |                |                  | A    |                    |                   |             |                   |                |                  |
| 2  | 159.076418         | 80.041847       |             |                  | 141.065853     | 71.036564        | S    | 1515.777500        | 758.392388        | 1498.750951 | 749.879114        | 1497.766935    | 749.3871         |
| 3  | 272.160482         | 136.583879      |             |                  | 254.149917     | 127.578597       | L    | 1428.745472        | 714.876374        | 1411.718923 | 706.363100        | 1410.734907    | 705.8710         |
| 4  | 400.219060         | 200.613168      | 383.192511  | 192.099894       | 382.208495     | 191.607886       | Q    | <b>1315.661408</b> | 658.334342        | 1298.634859 | <b>649.821068</b> | 1297.650843    | <b>649.3290</b>  |
| 5  | 537.277972         | 269.142624      | 520.251423  | 260.629350       | 519.267407     | 260.137342       | H    | <b>1187.602830</b> | <b>594.305053</b> | 1170.576281 | 585.791779        | 1169.592265    | 585.2997         |
| 6  | <b>594.299436</b>  | 297.653356      | 577.272887  | 289.140082       | 576.288871     | 288.648074       | G    | <b>1050.543918</b> | 525.775597        | 1033.517369 | 517.262323        | 1032.533353    | 516.7703         |
| 7  | 722.358014         | 361.682645      | 705.331465  | 353.169371       | 704.347449     | 352.677363       | Q    | <b>993.522454</b>  | 497.264865        | 976.495905  | 488.751591        | 975.511889     | 488.2595         |
| 8  | 793.395128         | 397.201202      | 776.368579  | 388.687928       | 775.384563     | 388.195920       | A    | <b>865.463876</b>  | 433.235576        | 848.437327  | 424.722302        | 847.453311     | 424.2302         |
| 9  | 864.432242         | 432.719759      | 847.405693  | 424.206485       | 846.421677     | 423.714477       | A    | 794.426762         | 397.717019        | 777.400213  | 389.203745        | 776.416197     | 388.7117         |
| 10 | <b>993.474835</b>  | 497.241056      | 976.448286  | 488.727781       | 975.464270     | 488.235773       | E    | 723.389648         | 362.198462        | 706.363099  | 353.685188        | 705.379083     | 353.1931         |
| 11 | 1121.569798        | 561.288537      | 1104.543249 | 552.775263       | 1103.559233    | 552.283255       | K    | <b>594.347055</b>  | 297.677166        | 577.320506  | 289.163891        |                |                  |
| 12 | 1178.591262        | 589.799269      | 1161.564713 | 581.285995       | 1160.580697    | 580.793987       | G    | <b>466.252092</b>  | 233.629684        | 449.225543  | 225.116409        |                |                  |
| 13 | 1275.644026        | 638.325651      | 1258.617477 | 629.812377       | 1257.633461    | 629.320369       | P    | <b>409.230628</b>  | 205.118952        | 392.204079  | 196.605677        |                |                  |
| 14 | <b>1412.702938</b> | 706.855107      | 1395.676389 | 698.341833       | 1394.692373    | 697.849825       | H    | 312.177864         | 156.592570        | 295.151315  | 148.079295        |                |                  |
| 15 |                    |                 |             |                  |                |                  | R    | 175.118952         | 88.063114         | 158.092403  | 79.549839         |                |                  |

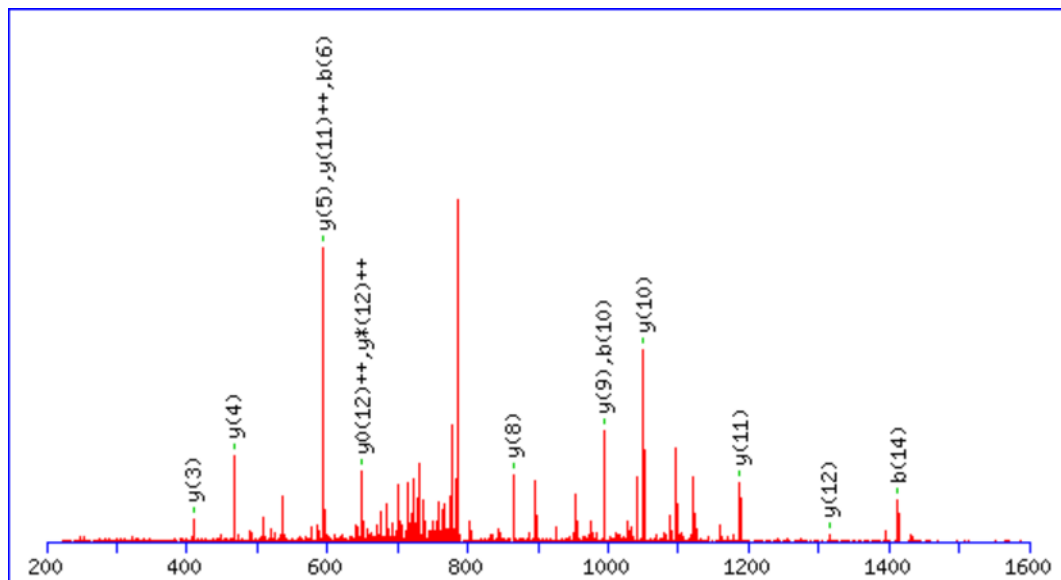

## Peptide View

MS/MS Fragmentation of **SFCDLTDEWR**

Found in **IPI00010193**, Tax\_Id=9606 Gene\_Symbol=IFNAR2 Isoform 1 of Interferon-alpha/beta receptor beta chain

**Experiment:** 47 - PyA-2 **Fraction:** PyA-2

Match to Query 7840: 1327.550848 from(664.782700,2+)

Title: OECHL100312\_01.16507.16507.2.dta

Data file \\BOROMIR\Masse\Data LTQ-Orbitrap\Chrystelle Lacroix\Etude clinique sJPU\OECHL100312\_01.raw

**Monoisotopic mass of neutral peptide Mr(calc):** 1327.550308 **Fixed modifications:** Carbamidomethyl (C) (apply to specified residues or termini only) **Ions**

**Score:** 55 **Expect:** 7.6e-005 **Matches :** 11/86 fragment ions using 12 most intense peaks ([help](#))

| # | b          | b <sup>++</sup> | b <sup>0</sup> | b <sup>0++</sup> | Seq. | y           | y <sup>++</sup> | y <sup>*</sup> | y <sup>*++</sup> | y <sup>0</sup> | y <sup>0++</sup> | #  |
|---|------------|-----------------|----------------|------------------|------|-------------|-----------------|----------------|------------------|----------------|------------------|----|
| 1 | 88.039304  | 44.523290       | 70.028739      | 35.518008        | S    |             |                 |                |                  |                |                  | 10 |
| 2 | 235.107718 | 118.057497      | 217.097153     | 109.052214       | F    | 1241.525550 | 621.266413      | 1224.499001    | 612.753138       | 1223.514985    | 612.261130       | 9  |
| 3 | 395.138367 | 198.072821      | 377.127802     | 189.067539       | C    | 1094.457136 | 547.732206      | 1077.430587    | 539.218932       | 1076.446571    | 538.726924       | 8  |
| 4 | 510.165310 | 255.586293      | 492.154745     | 246.581010       | D    | 934.426487  | 467.716882      | 917.399938     | 459.203607       | 916.415922     | 458.711599       | 7  |
| 5 | 623.249374 | 312.128325      | 605.238809     | 303.123043       | L    | 819.399544  | 410.203410      | 802.372995     | 401.690135       | 801.388979     | 401.198127       | 6  |

|    |             |            |             |            |   |            |            |            |            |            |            |   |
|----|-------------|------------|-------------|------------|---|------------|------------|------------|------------|------------|------------|---|
| 6  | 724.297053  | 362.652165 | 706.286488  | 353.646882 | T | 706.315480 | 353.661378 | 689.288931 | 345.148103 | 688.304915 | 344.656095 | 5 |
| 7  | 839.323996  | 420.165636 | 821.313431  | 411.160353 | D | 605.267801 | 303.137539 | 588.241252 | 294.624264 | 587.257236 | 294.132256 | 4 |
| 8  | 968.366589  | 484.686933 | 950.356024  | 475.681650 | E | 490.240858 | 245.624067 | 473.214309 | 237.110792 | 472.230293 | 236.618784 | 3 |
| 9  | 1154.445902 | 577.726589 | 1136.435337 | 568.721306 | W | 361.198265 | 181.102770 | 344.171716 | 172.589496 |            |            | 2 |
| 10 |             |            |             |            | R | 175.118952 | 88.063114  | 158.092403 | 79.549839  |            |            | 1 |

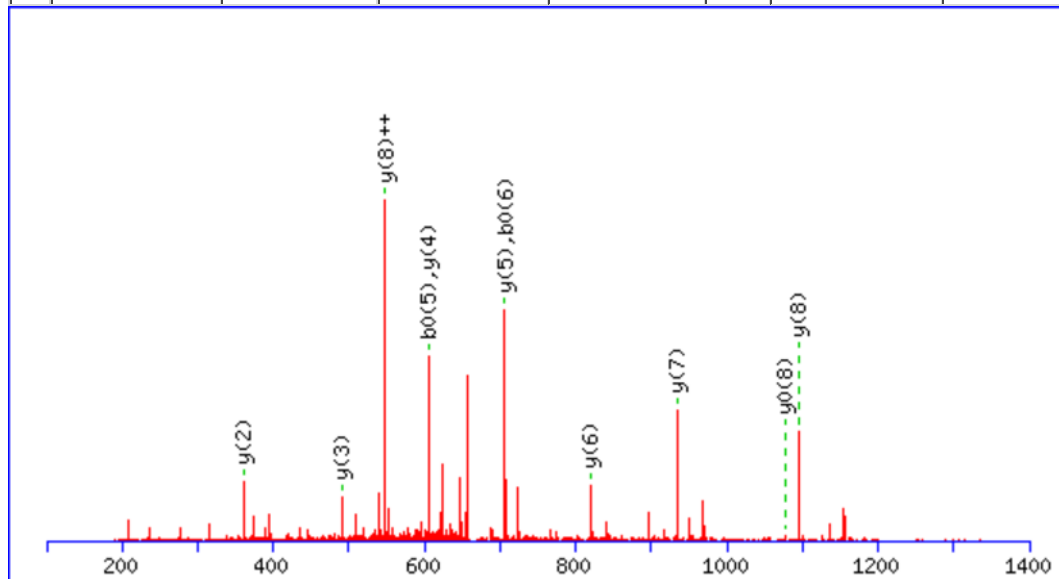

## Peptide View

MS/MS Fragmentation of **AVGLLTVISK**

Found in **IPI00013446**, Tax\_Id=9606 Gene\_Symbol=PSCA Prostate stem cell antigen

**Experiment:** 47 - PyA-2 **Fraction:** PyA-2

Match to Query 3053: 999.632848 from(500.823700,2+)

Title: OECHL100312\_01.16747.16747.2.dta

Data file \\BOROMIR\Masse\Data LTQ-Orbitrap\Chrystelle Lacroix\Etude clinique sJPU\OECHL100312\_01.raw

**Monoisotopic mass of neutral peptide Mr(calc):** 999.632828 **Fixed modifications:** Carbamidomethyl (C) (apply to specified residues or termini only) **Ions Score:**

60 **Expect:** 1.1e-005 **Matches :** 20/78 fragment ions using 33 most intense peaks ([help](#))

| # | b | b <sup>++</sup> | b <sup>0</sup> | b <sup>0++</sup> | Seq. | y | y <sup>++</sup> | y <sup>*</sup> | y <sup>*++</sup> | y <sup>0</sup> | y <sup>0++</sup> | # |
|---|---|-----------------|----------------|------------------|------|---|-----------------|----------------|------------------|----------------|------------------|---|
|---|---|-----------------|----------------|------------------|------|---|-----------------|----------------|------------------|----------------|------------------|---|

|    |                   |                   |                   |            |   |                   |                   |            |            |            |            |    |
|----|-------------------|-------------------|-------------------|------------|---|-------------------|-------------------|------------|------------|------------|------------|----|
| 1  | 72.044390         | 36.525833         |                   |            | A |                   |                   |            |            |            |            | 10 |
| 2  | <b>171.112804</b> | 86.060040         |                   |            | V | 929.602995        | 465.305136        | 912.576446 | 456.791861 | 911.592430 | 456.299853 | 9  |
| 3  | <b>228.134268</b> | 114.570772        |                   |            | G | <b>830.534581</b> | <b>415.770929</b> | 813.508032 | 407.257654 | 812.524016 | 406.765646 | 8  |
| 4  | <b>341.218332</b> | <b>171.112804</b> |                   |            | L | <b>773.513117</b> | <b>387.260197</b> | 756.486568 | 378.746922 | 755.502552 | 378.254914 | 7  |
| 5  | <b>454.302396</b> | <b>227.654836</b> |                   |            | L | <b>660.429053</b> | 330.718165        | 643.402504 | 322.204890 | 642.418488 | 321.712882 | 6  |
| 6  | <b>555.350075</b> | 278.178676        | 537.339510        | 269.173393 | T | <b>547.344989</b> | 274.176133        | 530.318440 | 265.662858 | 529.334424 | 265.170850 | 5  |
| 7  | <b>654.418489</b> | 327.712883        | <b>636.407924</b> | 318.707600 | V | <b>446.297310</b> | 223.652293        | 429.270761 | 215.139018 | 428.286745 | 214.647010 | 4  |
| 8  | <b>767.502553</b> | 384.254915        | 749.491988        | 375.249632 | I | <b>347.228896</b> | 174.118086        | 330.202347 | 165.604811 | 329.218331 | 165.112803 | 3  |
| 9  | <b>854.534581</b> | 427.770929        | 836.524016        | 418.765646 | S | <b>234.144832</b> | 117.576054        | 217.118283 | 109.062779 | 216.134267 | 108.570771 | 2  |
| 10 |                   |                   |                   |            | K | 147.112804        | 74.060040         | 130.086255 | 65.546765  |            |            | 1  |

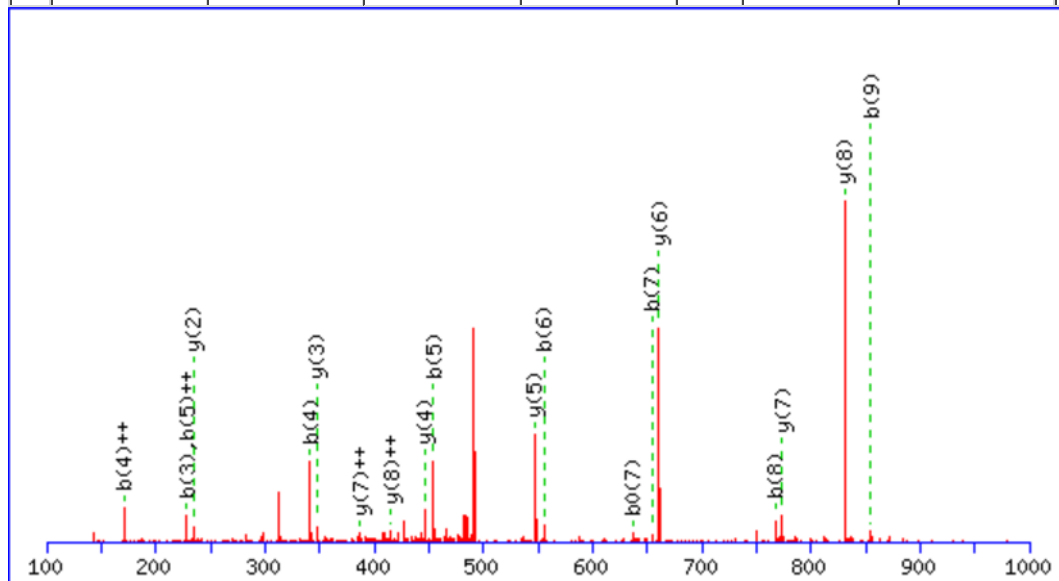

## Peptide View

MS/MS Fragmentation of **SDAAVDTSSSEITTK**

Found in **IPI00412977**, Tax\_Id=9606 Gene\_Symbol=- Prothymosin alpha

Experiment: 47 - PyA-2 Fraction: PyA-2

Match to Query 9202: 1465.680448 from(733.847500,2+)

Title: OECHL100312\_01.9363.9363.2.dta

Data file \\BOROMIR\Masse\Data LTQ-Orbitrap\Chrystelle Lacroix\Etude clinique sJPU\OECHL100312\_01.raw

**Monoisotopic mass of neutral peptide Mr(calc):** 1465.678391 **Fixed modifications:** Carbamidomethyl (C) (apply to specified residues or termini only) **Variable modifications:** N-term : Acetyl (N-term) **Ions Score:** 56 **Expect:** 0.00024 **Matches :** 42/128 fragment ions using 109 most intense peaks ([help](#))

| #  | b           | b <sup>++</sup> | b <sup>0</sup> | b <sup>0++</sup> | Seq. | y           | y <sup>++</sup> | y*          | y <sup>*++</sup> | y <sup>0</sup> | y <sup>0++</sup> | #  |
|----|-------------|-----------------|----------------|------------------|------|-------------|-----------------|-------------|------------------|----------------|------------------|----|
| 1  | 130.049869  | 65.528572       | 112.039304     | 56.523290        | S    |             |                 |             |                  |                |                  | 14 |
| 2  | 245.076812  | 123.042044      | 227.066247     | 114.036761       | D    | 1337.643082 | 669.325179      | 1320.616533 | 660.811905       | 1319.632517    | 660.319897       | 13 |
| 3  | 316.113926  | 158.560601      | 298.103361     | 149.555319       | A    | 1222.616139 | 611.811708      | 1205.589590 | 603.298433       | 1204.605574    | 602.806425       | 12 |
| 4  | 387.151040  | 194.079158      | 369.140475     | 185.073875       | A    | 1151.579025 | 576.293151      | 1134.552476 | 567.779876       | 1133.568460    | 567.287868       | 11 |
| 5  | 486.219454  | 243.613365      | 468.208889     | 234.608082       | V    | 1080.541911 | 540.774594      | 1063.515362 | 532.261319       | 1062.531346    | 531.769311       | 10 |
| 6  | 601.246397  | 301.126837      | 583.235832     | 292.121554       | D    | 981.473497  | 491.240387      | 964.446948  | 482.727112       | 963.462932     | 482.235104       | 9  |
| 7  | 702.294076  | 351.650676      | 684.283511     | 342.645394       | T    | 866.446554  | 433.726915      | 849.420005  | 425.213641       | 848.435989     | 424.721633       | 8  |
| 8  | 789.326104  | 395.166690      | 771.315539     | 386.161408       | S    | 765.398875  | 383.203076      | 748.372326  | 374.689801       | 747.388310     | 374.197793       | 7  |
| 9  | 876.358132  | 438.682704      | 858.347567     | 429.677421       | S    | 678.366847  | 339.687062      | 661.340298  | 331.173787       | 660.356282     | 330.681779       | 6  |
| 10 | 1005.400725 | 503.204001      | 987.390160     | 494.198718       | E    | 591.334819  | 296.171048      | 574.308270  | 287.657773       | 573.324254     | 287.165765       | 5  |
| 11 | 1118.484789 | 559.746033      | 1100.474224    | 550.740750       | I    | 462.292226  | 231.649751      | 445.265677  | 223.136477       | 444.281661     | 222.644469       | 4  |
| 12 | 1219.532468 | 610.269872      | 1201.521903    | 601.264590       | T    | 349.208162  | 175.107719      | 332.181613  | 166.594445       | 331.197597     | 166.102437       | 3  |
| 13 | 1320.580147 | 660.793712      | 1302.569582    | 651.788429       | T    | 248.160483  | 124.583879      | 231.133934  | 116.070605       | 230.149918     | 115.578597       | 2  |
| 14 |             |                 |                |                  | K    | 147.112804  | 74.060040       | 130.086255  | 65.546765        |                |                  | 1  |

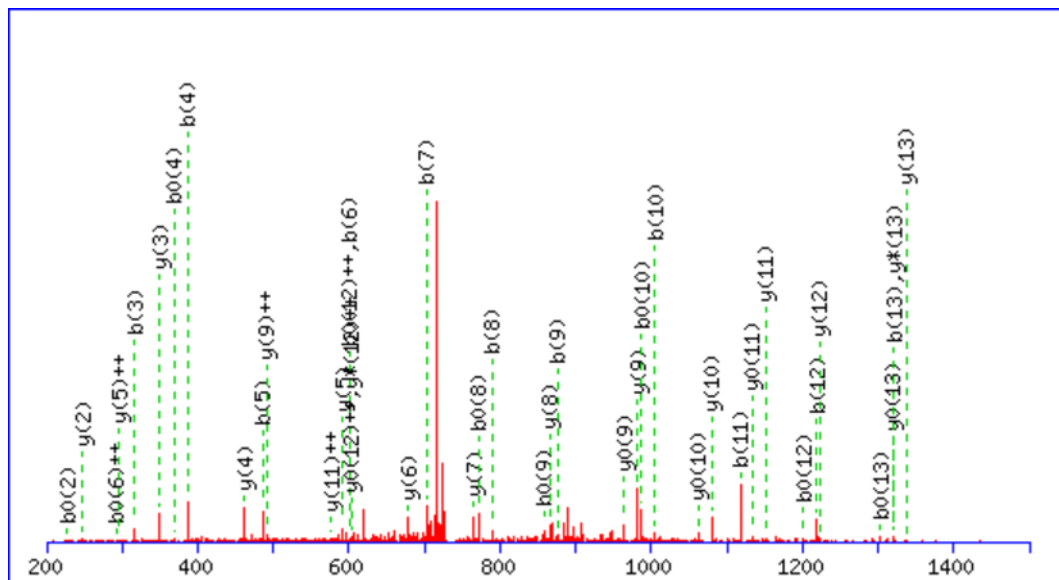

## Peptide View

MS/MS Fragmentation of **LLYDASNLETGVPSR**

Found in **IPI00003111**, Tax\_Id=9606 Gene\_Symbol=LOC652694 Ig kappa chain V-I region AU

**Experiment:** 47 - PyA-2 **Fraction:** PyA-2

Match to Query 12476: 1746.915448 from(874.465000,2+)

Title: OECHL100312\_01.16576.16576.2.dta

Data file \\BOROMIR\Masse\Data LTQ-Orbitrap\Chrystelle Lacroix\Etude clinique sJPU\OECHL100312\_01.raw

**Monoisotopic mass of neutral peptide Mr(calc):** 1746.915192 **Fixed modifications:** Carbamidomethyl (C) (apply to specified residues or termini only) **Ions**

**Score:** 83 **Expect:** 5.3e-007 **Matches :** 22/156 fragment ions using 30 most intense peaks ([help](#))

| # | b                 | b <sup>++</sup> | b* | b <sup>*++</sup> | b <sup>0</sup> | b <sup>0++</sup> | Seq. | y                  | y <sup>++</sup>   | y*          | y <sup>*++</sup> | y <sup>0</sup>     | y <sup>0++</sup> |
|---|-------------------|-----------------|----|------------------|----------------|------------------|------|--------------------|-------------------|-------------|------------------|--------------------|------------------|
| 1 | 114.091340        | 57.549308       |    |                  |                |                  | L    |                    |                   |             |                  |                    |                  |
| 2 | 227.175404        | 114.091340      |    |                  |                |                  | L    | 1634.838427        | 817.922852        | 1617.811878 | 809.409577       | 1616.827862        | 808.9175         |
| 3 | 340.259468        | 170.633372      |    |                  |                |                  | I    | <b>1521.754363</b> | <b>761.380820</b> | 1504.727814 | 752.867545       | 1503.743798        | 752.3755         |
| 4 | 503.322797        | 252.165036      |    |                  |                |                  | Y    | 1408.670299        | 704.838788        | 1391.643750 | 696.325513       | <b>1390.659734</b> | 695.8335         |
| 5 | <b>618.349740</b> | 309.678508      |    |                  | 600.339175     | 300.673226       | D    | <b>1245.606970</b> | 623.307123        | 1228.580421 | 614.793849       | 1227.596405        | 614.3018         |

|    |                    |            |             |            |             |            |          |                    |            |                   |            |                   |          |
|----|--------------------|------------|-------------|------------|-------------|------------|----------|--------------------|------------|-------------------|------------|-------------------|----------|
| 6  | <b>689.386854</b>  | 345.197065 |             |            | 671.376289  | 336.191782 | <b>A</b> | <b>1130.580027</b> | 565.793652 | 1113.553478       | 557.280377 | 1112.569462       | 556.7883 |
| 7  | 776.418882         | 388.713079 |             |            | 758.408317  | 379.707796 | <b>S</b> | 1059.542913        | 530.275095 | 1042.516364       | 521.761820 | 1041.532348       | 521.2698 |
| 8  | 890.461809         | 445.734542 | 873.435260  | 437.221268 | 872.451244  | 436.729260 | <b>N</b> | <b>972.510885</b>  | 486.759081 | 955.484336        | 478.245806 | 954.500320        | 477.7537 |
| 9  | <b>1003.545873</b> | 502.276574 | 986.519324  | 493.763300 | 985.535308  | 493.271292 | <b>L</b> | <b>858.467958</b>  | 429.737617 | 841.441409        | 421.224343 | 840.457393        | 420.7323 |
| 10 | <b>1132.588466</b> | 566.797871 | 1115.561917 | 558.284597 | 1114.577901 | 557.792588 | <b>E</b> | <b>745.383894</b>  | 373.195585 | 728.357345        | 364.682311 | 727.373329        | 364.1903 |
| 11 | <b>1233.636145</b> | 617.321710 | 1216.609596 | 608.808436 | 1215.625580 | 608.316428 | <b>T</b> | <b>616.341301</b>  | 308.674289 | 599.314752        | 300.161014 | 598.330736        | 299.6690 |
| 12 | <b>1290.657609</b> | 645.832442 | 1273.631060 | 637.319168 | 1272.647044 | 636.827160 | <b>G</b> | <b>515.293622</b>  | 258.150449 | 498.267073        | 249.637175 | 497.283057        | 249.1451 |
| 13 | <b>1389.726023</b> | 695.366649 | 1372.699474 | 686.853375 | 1371.715458 | 686.361367 | <b>V</b> | <b>458.272158</b>  | 229.639717 | 441.245609        | 221.126443 | 440.261593        | 220.6344 |
| 14 | 1486.778787        | 743.893032 | 1469.752238 | 735.379757 | 1468.768222 | 734.887749 | <b>P</b> | <b>359.203744</b>  | 180.105510 | <b>342.177195</b> | 171.592236 | <b>341.193179</b> | 171.1002 |
| 15 | <b>1573.810815</b> | 787.409046 | 1556.784266 | 778.895771 | 1555.800250 | 778.403763 | <b>S</b> | 262.150980         | 131.579128 | 245.124431        | 123.065854 | 244.140415        | 122.5738 |
| 16 |                    |            |             |            |             |            | <b>R</b> | 175.118952         | 88.063114  | 158.092403        | 79.549839  |                   |          |

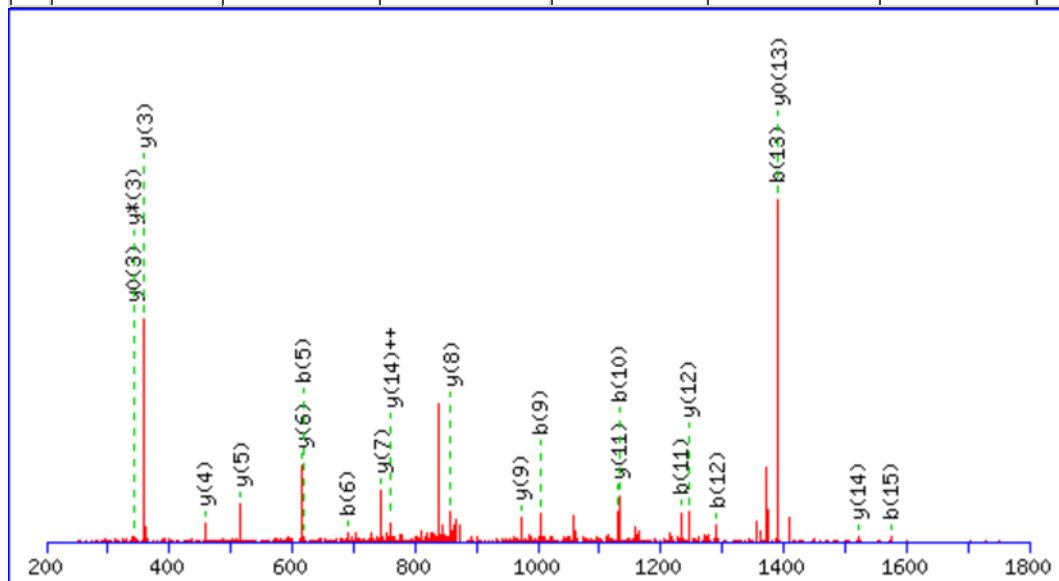

## Peptide View

MS/MS Fragmentation of **VTATGFQQCSLIDGR**

Found in **IPI00333140**, Tax\_Id=9606 Gene\_Symbol=DNER Delta and Notch-like epidermal growth factor-related receptor

**Experiment:** 47 - PyA-2 **Fraction:** PyA-2

Match to Query 11348: 1651.796248 from(826.905400,2+)

Title: OECHL100312\_01.13430.13430.2.dta

Data file \\BOROMIR\Masse\Data LTQ-Orbitrap\Chrystelle Lacroix\Etude clinique sJPU\OECHL100312\_01.raw

**Monoisotopic mass of neutral peptide Mr(calc):** 1651.798828**Fixed modifications:** Carbamidomethyl (C) (apply to specified residues or termini only)**Ions****Score:** 57 **Expect:** 0.00023**Matches :** 36/150 fragment ions using 96 most intense peaks ([help](#))

| #  | <b>b</b>           | <b>b<sup>++</sup></b> | <b>b<sup>*</sup></b> | <b>b<sup>*++</sup></b> | <b>b<sup>0</sup></b> | <b>b<sup>0++</sup></b> | Seq.     | <b>y</b>           | <b>y<sup>++</sup></b> | <b>y<sup>*</sup></b> | <b>y<sup>*++</sup></b> | <b>y<sup>0</sup></b> | <b>y<sup>0++</sup></b> |
|----|--------------------|-----------------------|----------------------|------------------------|----------------------|------------------------|----------|--------------------|-----------------------|----------------------|------------------------|----------------------|------------------------|
| 1  | 100.075690         | 50.541483             |                      |                        |                      |                        | <b>V</b> |                    |                       |                      |                        |                      |                        |
| 2  | 201.123369         | 101.065322            |                      |                        | 183.112804           | 92.060040              | <b>T</b> | 1553.737670        | 777.372473            | 1536.711121          | 768.859198             | 1535.727105          | 768.3671               |
| 3  | <b>272.160483</b>  | 136.583879            |                      |                        | <b>254.149918</b>    | 127.578597             | <b>A</b> | <b>1452.689991</b> | <b>726.848633</b>     | 1435.663442          | <b>718.335359</b>      | 1434.679426          | 717.8433               |
| 4  | <b>373.208162</b>  | 187.107719            |                      |                        | <b>355.197597</b>    | 178.102437             | <b>T</b> | <b>1381.652877</b> | <b>691.330076</b>     | 1364.626328          | 682.816802             | 1363.642312          | 682.3247               |
| 5  | <b>430.229626</b>  | 215.618451            |                      |                        | 412.219061           | 206.613169             | <b>G</b> | <b>1280.605198</b> | 640.806237            | 1263.578649          | 632.292962             | 1262.594633          | 631.8009               |
| 6  | 577.298040         | 289.152658            |                      |                        | <b>559.287475</b>    | 280.147376             | <b>F</b> | <b>1223.583734</b> | <b>612.295505</b>     | 1206.557185          | 603.782230             | 1205.573169          | 603.2902               |
| 7  | <b>705.356618</b>  | 353.181947            | 688.330069           | 344.668673             | 687.346053           | 344.176665             | <b>Q</b> | <b>1076.515320</b> | 538.761298            | <b>1059.488771</b>   | <b>530.248023</b>      | 1058.504755          | 529.7560               |
| 8  | <b>833.415196</b>  | 417.211236            | 816.388647           | 408.697962             | 815.404631           | 408.205954             | <b>Q</b> | <b>948.456742</b>  | 474.732009            | 931.430193           | 466.218734             | 930.446177           | 465.7267               |
| 9  | 993.445845         | 497.226561            | 976.419296           | 488.713286             | <b>975.435280</b>    | 488.221278             | <b>C</b> | <b>820.398164</b>  | 410.702720            | 803.371615           | 402.189445             | 802.387599           | 401.6974               |
| 10 | 1080.477873        | 540.742575            | 1063.451324          | 532.229300             | 1062.467308          | 531.737292             | <b>S</b> | <b>660.367515</b>  | 330.687395            | 643.340966           | 322.174121             | 642.356950           | 321.6821               |
| 11 | <b>1193.561937</b> | 597.284607            | 1176.535388          | 588.771332             | <b>1175.551372</b>   | 588.279324             | <b>L</b> | <b>573.335487</b>  | 287.171381            | 556.308938           | 278.658107             | <b>555.324922</b>    | 278.1660               |
| 12 | <b>1306.646001</b> | 653.826638            | <b>1289.619452</b>   | 645.313364             | <b>1288.635436</b>   | 644.821356             | <b>I</b> | <b>460.251423</b>  | 230.629349            | 443.224874           | 222.116075             | 442.240858           | 221.6240               |
| 13 | <b>1421.672944</b> | 711.340110            | 1404.646395          | 702.826836             | 1403.662379          | 702.334827             | <b>D</b> | <b>347.167359</b>  | 174.087317            | 330.140810           | 165.574043             | <b>329.156794</b>    | 165.0820               |
| 14 | 1478.694408        | 739.850842            | 1461.667859          | 731.337567             | 1460.683843          | 730.845559             | <b>G</b> | <b>232.140416</b>  | 116.573846            | 215.113867           | 108.060571             |                      |                        |
| 15 |                    |                       |                      |                        |                      |                        | <b>R</b> | 175.118952         | 88.063114             | 158.092403           | 79.549839              |                      |                        |



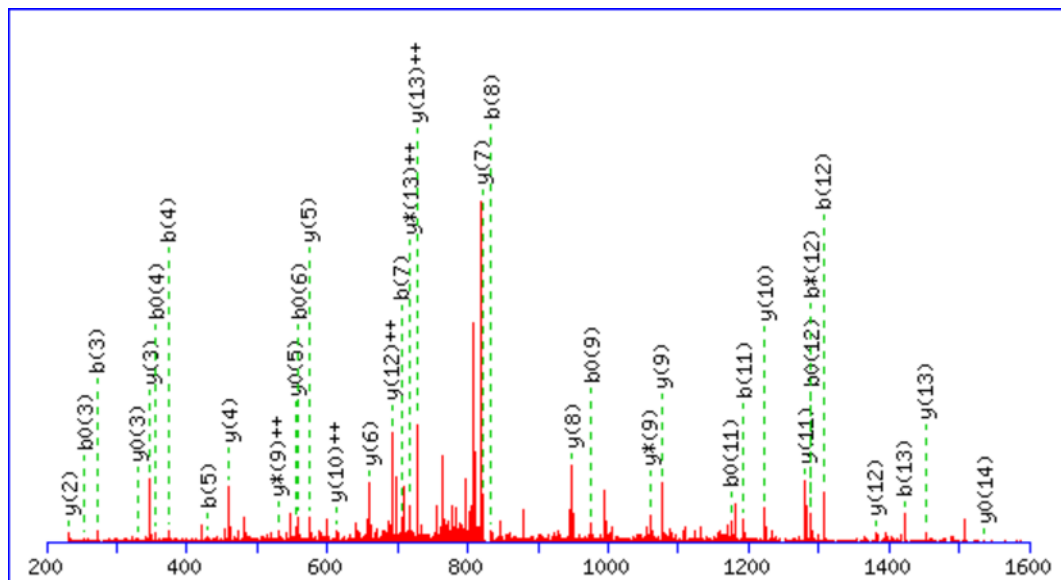

## Peptide View

### MS/MS Fragmentation of **GMQLMHANAQR**

Found in **IPI0007853**, Tax\_Id=9606 Gene\_Symbol=IFI30 Gamma-interferon-inducible lysosomal thiol reductase

**Experiment:** 47 - PyA-2 **Fraction:** PyA-2

Match to Query 6882: 1255.590848 from(628.802700,2+)

Title: OECHL100312\_01.5521.5521.2.dta

Data file \\BOROMIR\Masse\Data LTQ-Orbitrap\Chrystelle Lacroix\Etude clinique sJPU\OECHL100312\_01.raw

**Monoisotopic mass of neutral peptide Mr(calc):** 1255.591370 **Fixed modifications:** Carbamidomethyl (C) (apply to specified residues or termini only) **Ions**

**Score:** 51 **Expect:** 0.00051 **Matches :** 17/76 fragment ions using 31 most intense peaks ([help](#))

| # | b                 | b <sup>++</sup> | b*         | b <sup>*++</sup> | Seq.     | y                  | y <sup>++</sup>   | y*          | y <sup>*++</sup>  | #         |
|---|-------------------|-----------------|------------|------------------|----------|--------------------|-------------------|-------------|-------------------|-----------|
| 1 | 58.028740         | 29.518008       |            |                  | <b>G</b> |                    |                   |             |                   | <b>11</b> |
| 2 | <b>189.069225</b> | 95.038250       |            |                  | <b>M</b> | 1199.577209        | 600.292243        | 1182.550660 | 591.778968        | <b>10</b> |
| 3 | <b>317.127803</b> | 159.067540      | 300.101254 | 150.554265       | <b>Q</b> | <b>1068.536724</b> | 534.772000        | 1051.510175 | <b>526.258726</b> | <b>9</b>  |
| 4 | <b>430.211867</b> | 215.609572      | 413.185318 | 207.096297       | <b>L</b> | <b>940.478146</b>  | <b>470.742711</b> | 923.451597  | 462.229436        | <b>8</b>  |
| 5 | 561.252352        | 281.129814      | 544.225803 | 272.616540       | <b>M</b> | <b>827.394082</b>  | 414.200679        | 810.367533  | 405.687404        | <b>7</b>  |

|    |                    |            |             |            |   |                   |            |                   |            |   |
|----|--------------------|------------|-------------|------------|---|-------------------|------------|-------------------|------------|---|
| 6  | <b>698.311264</b>  | 349.659270 | 681.284715  | 341.145996 | H | <b>696.353597</b> | 348.680436 | 679.327048        | 340.167162 | 6 |
| 7  | 769.348378         | 385.177827 | 752.321829  | 376.664553 | A | <b>559.294685</b> | 280.150981 | 542.268136        | 271.637706 | 5 |
| 8  | <b>883.391305</b>  | 442.199291 | 866.364756  | 433.686016 | N | <b>488.257571</b> | 244.632423 | <b>471.231022</b> | 236.119149 | 4 |
| 9  | <b>954.428419</b>  | 477.717848 | 937.401870  | 469.204573 | A | <b>374.214644</b> | 187.610960 | 357.188095        | 179.097685 | 3 |
| 10 | <b>1082.486997</b> | 541.747137 | 1065.460448 | 533.233862 | Q | 303.177530        | 152.092403 | 286.150981        | 143.579128 | 2 |
| 11 |                    |            |             |            | R | 175.118952        | 88.063114  | 158.092403        | 79.549839  | 1 |

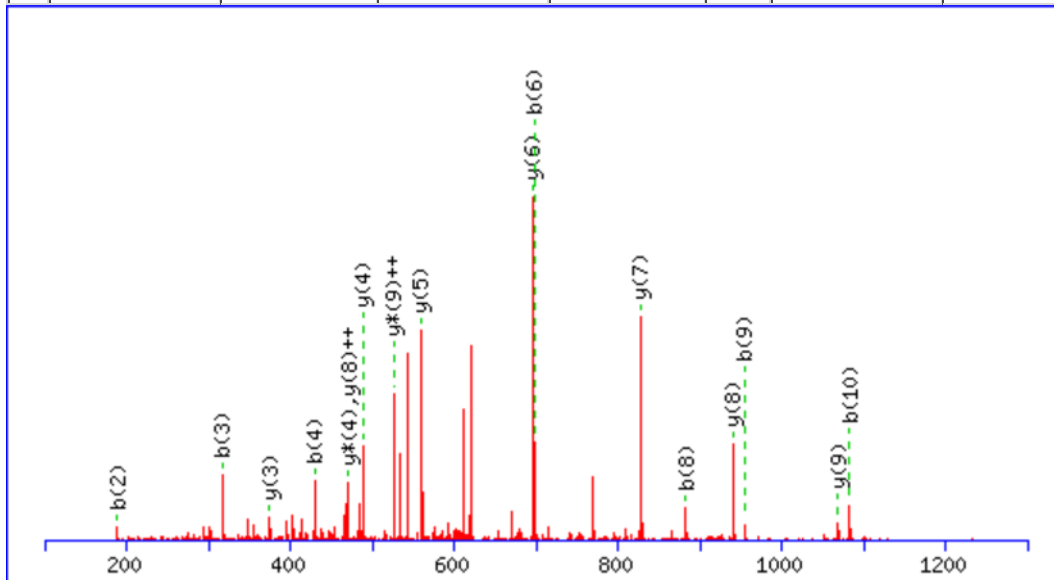

## Peptide View

MS/MS Fragmentation of **ALVQIVK**

Found in **IPI00216569**, Tax\_Id=9606 Gene\_Symbol=CST7 Cystatin-F precursor

**Experiment:** 47 - PyA-2 **Fraction:** PyA-2

Match to Query 643: 770.490848 from(386.252700,2+)

Title: OECHL100312\_01.11350.11350.2.dta

Data file \\BOROMIR\Masse\Data LTQ-Orbitrap\Chrystelle Lacroix\Etude clinique sJPU\OECHL100312\_01.raw

**Monoisotopic mass of neutral peptide Mr(calc):** 770.490173 **Fixed modifications:** Carbamidomethyl (C) (apply to specified residues or termini only) **Variable modifications:** Q4 : Deamidated (NQ) **Ions Score:** 58 **Expect:** 7e-005 **Matches :** 13/42 fragment ions using 18 most intense peaks ([help](#))

| # | <b>b</b>          | <b>b<sup>++</sup></b> | <b>b*</b>         | <b>b<sup>*++</sup></b> | Seq. | <b>y</b>          | <b>y<sup>++</sup></b> | <b>y*</b>  | <b>y<sup>*++</sup></b> | # |
|---|-------------------|-----------------------|-------------------|------------------------|------|-------------------|-----------------------|------------|------------------------|---|
| 1 | 72.044390         | 36.525833             |                   |                        | A    |                   |                       |            |                        | 7 |
| 2 | <b>185.128454</b> | 93.067865             |                   |                        | L    | <b>700.460354</b> | <b>350.733815</b>     | 683.433805 | 342.220541             | 6 |
| 3 | <b>284.196868</b> | 142.602072            |                   |                        | V    | <b>587.376290</b> | <b>294.191783</b>     | 570.349741 | 285.678509             | 5 |
| 4 | 413.239462        | 207.123369            | 396.212913        | 198.610095             | Q    | <b>488.307876</b> | 244.657576            | 471.281327 | 236.144301             | 4 |
| 5 | <b>526.323526</b> | 263.665401            | <b>509.296977</b> | 255.152127             | I    | <b>359.265282</b> | 180.136279            | 342.238733 | 171.623004             | 3 |
| 6 | <b>625.391940</b> | 313.199608            | 608.365391        | 304.686333             | V    | <b>246.181218</b> | 123.594247            | 229.154669 | 115.080972             | 2 |
| 7 |                   |                       |                   |                        | K    | <b>147.112804</b> | 74.060040             | 130.086255 | 65.546765              | 1 |

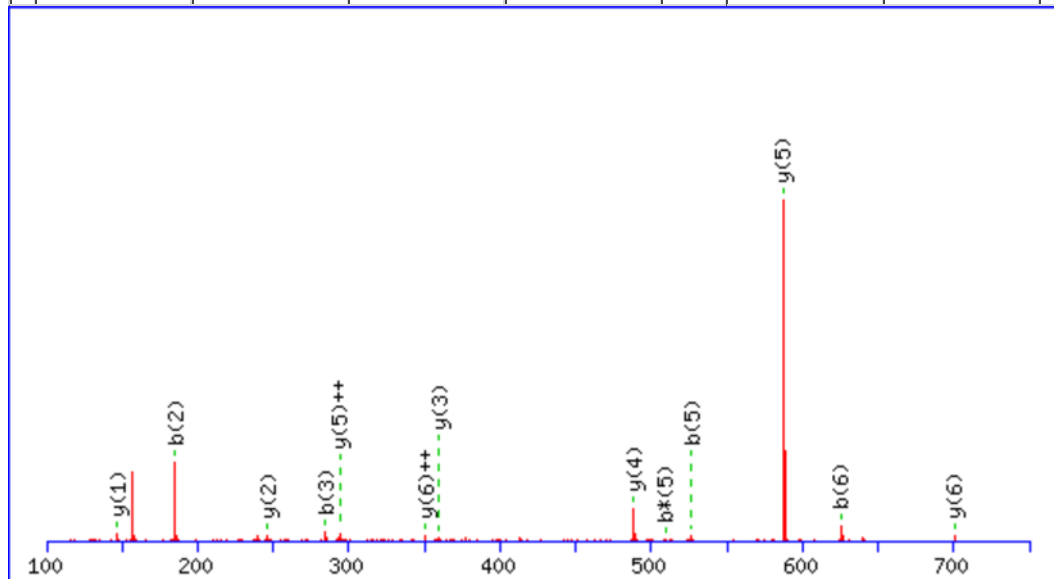

## Peptide View

MS/MS Fragmentation of **QQTEEMWEVLKPK**

Found in **IPI00007778**, Tax\_Id=9606 Gene\_Symbol=CTBS Di-N-acetylchitobiase

**Experiment:** 47 - PyA-2 **Fraction:** PyA-2

Match to Query 11228: 1644.819648 from(823.417100,2+)

Title: OECHL100312\_01.15426.15426.2.dta

Data file \\BOROMIR\Masse\Data LTQ-Orbitrap\Chrystelle Lacroix\Etude clinique sJPU\OECHL100312\_01.raw

**Monoisotopic mass of neutral peptide Mr(calc):** 1644.818115**Fixed modifications:** Carbamidomethyl (C) (apply to specified residues or termini only)**Ions****Score:** 54 **Expect:** 0.00057**Matches :** 29/130 fragment ions using 56 most intense peaks ([help](#))

| #  | b           | b <sup>++</sup> | b*          | b* <sup>++</sup> | b <sup>0</sup> | b <sup>0++</sup> | Seq. | y           | y <sup>++</sup> | y*          | y* <sup>++</sup> | y <sup>0</sup> | y <sup>0++</sup> |
|----|-------------|-----------------|-------------|------------------|----------------|------------------|------|-------------|-----------------|-------------|------------------|----------------|------------------|
| 1  | 129.065854  | 65.036565       | 112.039305  | 56.523291        |                |                  | Q    |             |                 |             |                  |                |                  |
| 2  | 257.124432  | 129.065854      | 240.097883  | 120.552580       |                |                  | Q    | 1517.766843 | 759.387060      | 1500.740294 | 750.873785       | 1499.756278    | 750.3817         |
| 3  | 358.172111  | 179.589694      | 341.145562  | 171.076419       | 340.161546     | 170.584411       | T    | 1389.708265 | 695.357771      | 1372.681716 | 686.844496       | 1371.697700    | 686.3524         |
| 4  | 487.214704  | 244.110990      | 470.188155  | 235.597716       | 469.204139     | 235.105708       | E    | 1288.660586 | 644.833931      | 1271.634037 | 636.320657       | 1270.650021    | 635.8286         |
| 5  | 616.257297  | 308.632287      | 599.230748  | 300.119012       | 598.246732     | 299.627004       | E    | 1159.617993 | 580.312635      | 1142.591444 | 571.799360       | 1141.607428    | 571.3073         |
| 6  | 747.297782  | 374.152529      | 730.271233  | 365.639255       | 729.287217     | 365.147247       | M    | 1030.575400 | 515.791338      | 1013.548851 | 507.278064       | 1012.564835    | 506.7860         |
| 7  | 933.377095  | 467.192186      | 916.350546  | 458.678911       | 915.366530     | 458.186903       | W    | 899.534915  | 450.271096      | 882.508366  | 441.757821       | 881.524350     | 441.2658         |
| 8  | 1062.419688 | 531.713482      | 1045.393139 | 523.200208       | 1044.409123    | 522.708200       | E    | 713.455602  | 357.231439      | 696.429053  | 348.718165       | 695.445037     | 348.2261         |
| 9  | 1161.488102 | 581.247689      | 1144.461553 | 572.734415       | 1143.477537    | 572.242407       | V    | 584.413009  | 292.710143      | 567.386460  | 284.196868       |                |                  |
| 10 | 1274.572166 | 637.789721      | 1257.545617 | 629.276447       | 1256.561601    | 628.784439       | L    | 485.344595  | 243.175935      | 468.318046  | 234.662661       |                |                  |
| 11 | 1402.667129 | 701.837203      | 1385.640580 | 693.323928       | 1384.656564    | 692.831920       | K    | 372.260531  | 186.633904      | 355.233982  | 178.120629       |                |                  |
| 12 | 1499.719893 | 750.363585      | 1482.693344 | 741.850310       | 1481.709328    | 741.358302       | P    | 244.165568  | 122.586422      | 227.139019  | 114.073148       |                |                  |
| 13 |             |                 |             |                  |                |                  | K    | 147.112804  | 74.060040       | 130.086255  | 65.546765        |                |                  |

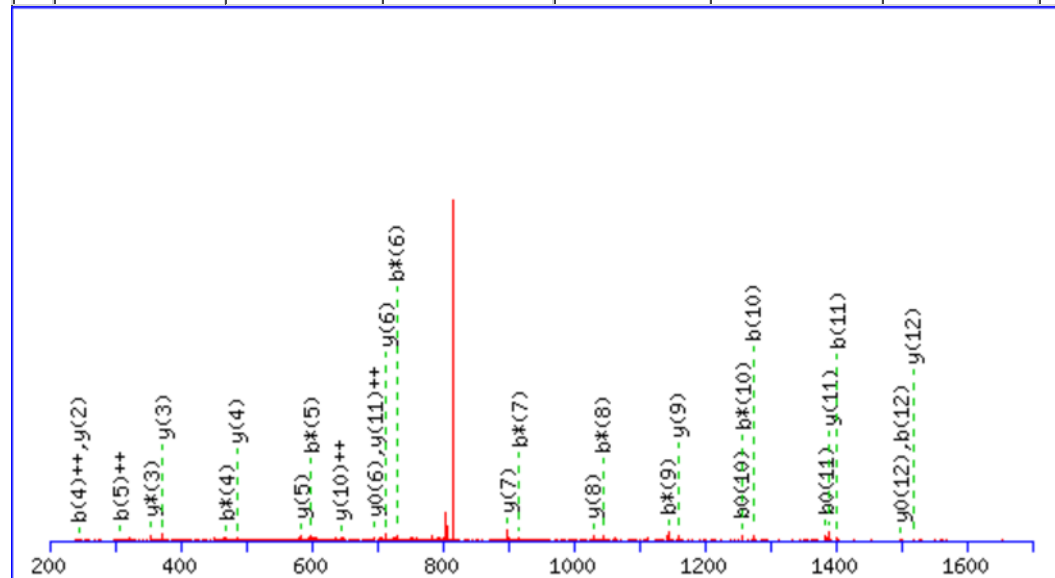

## Peptide View

MS/MS Fragmentation of **KAGPCEQAGSPCR**

Found in **IPI00028381**, Tax\_Id=9606 Gene\_Symbol=DLK2 Isoform 1 of Protein delta homolog 2

**Experiment:** 47 - PyA-2 **Fraction:** PyA-2

Match to Query 8660: 1416.625248 from(709.319900,2+)

Title: OECHL100312\_01.1955.1955.2.dta

Data file \\BOROMIR\Masse\Data LTQ-Orbitrap\Chrystelle Lacroix\Etude clinique sJPU\OECHL100312\_01.raw

**Monoisotopic mass of neutral peptide Mr(calc):** 1416.623810 **Fixed modifications:** Carbamidomethyl (C) (apply to specified residues or termini only) **Ions**

**Score:** 67 **Expect:** 1.2e-005 **Matches :** 25/128 fragment ions using 48 most intense peaks ([help](#))

| #  | b                 | b <sup>++</sup>   | b*                | b <sup>*++</sup> | b <sup>0</sup>     | b <sup>0++</sup> | Seq.     | y                  | y <sup>++</sup>   | y*                | y <sup>*++</sup>  | y <sup>0</sup> | y <sup>0++</sup> |
|----|-------------------|-------------------|-------------------|------------------|--------------------|------------------|----------|--------------------|-------------------|-------------------|-------------------|----------------|------------------|
| 1  | 129.102239        | 65.054757         | 112.075690        | 56.541483        |                    |                  | <b>K</b> |                    |                   |                   |                   |                |                  |
| 2  | 200.139353        | 100.573315        | 183.112804        | 92.060040        |                    |                  | <b>A</b> | <b>1289.536133</b> | <b>645.271705</b> | 1272.509584       | 636.758430        | 1271.525568    | 636.2664         |
| 3  | <b>257.160817</b> | 129.084047        | 240.134268        | 120.570772       |                    |                  | <b>G</b> | <b>1218.499019</b> | <b>609.753148</b> | 1201.472470       | 601.239873        | 1200.488454    | 600.7478         |
| 4  | 354.213581        | 177.610429        | 337.187032        | 169.097154       |                    |                  | <b>P</b> | <b>1161.477555</b> | <b>581.242416</b> | 1144.451006       | 572.729141        | 1143.466990    | 572.2371         |
| 5  | 514.244230        | <b>257.625753</b> | 497.217681        | 249.112479       |                    |                  | <b>C</b> | <b>1064.424791</b> | 532.716034        | 1047.398242       | 524.202759        | 1046.414226    | 523.7107         |
| 6  | 643.286823        | 322.147050        | 626.260274        | 313.633775       | 625.276258         | 313.141767       | <b>E</b> | <b>904.394142</b>  | 452.700709        | <b>887.367593</b> | <b>444.187434</b> | 886.383577     | 443.6954         |
| 7  | 771.345401        | 386.176339        | 754.318852        | 377.663064       | 753.334836         | 377.171056       | <b>Q</b> | <b>775.351549</b>  | 388.179413        | 758.325000        | 379.666138        | 757.340984     | 379.1741         |
| 8  | <b>842.382515</b> | 421.694896        | <b>825.355966</b> | 413.181621       | 824.371950         | 412.689613       | <b>A</b> | <b>647.292971</b>  | 324.150124        | 630.266422        | 315.636849        | 629.282406     | <b>315.1448</b>  |
| 9  | <b>899.403979</b> | 450.205628        | 882.377430        | 441.692353       | 881.393414         | 441.200345       | <b>G</b> | <b>576.255857</b>  | 288.631567        | 559.229308        | 280.118292        | 558.245292     | 279.6262         |
| 10 | <b>986.436007</b> | 493.721642        | <b>969.409458</b> | 485.208367       | 968.425442         | 484.716359       | <b>S</b> | <b>519.234393</b>  | 260.120835        | 502.207844        | 251.607560        | 501.223828     | 251.1155         |
| 11 | 1083.488771       | 542.248024        | 1066.462222       | 533.734749       | <b>1065.478206</b> | 533.242741       | <b>P</b> | <b>432.202365</b>  | 216.604820        | <b>415.175816</b> | 208.091546        |                |                  |
| 12 | 1243.519420       | 622.263348        | 1226.492871       | 613.750074       | 1225.508855        | 613.258066       | <b>C</b> | 335.149601         | 168.078438        | 318.123052        | 159.565164        |                |                  |
| 13 |                   |                   |                   |                  |                    |                  | <b>R</b> | 175.118952         | 88.063114         | 158.092403        | 79.549839         |                |                  |

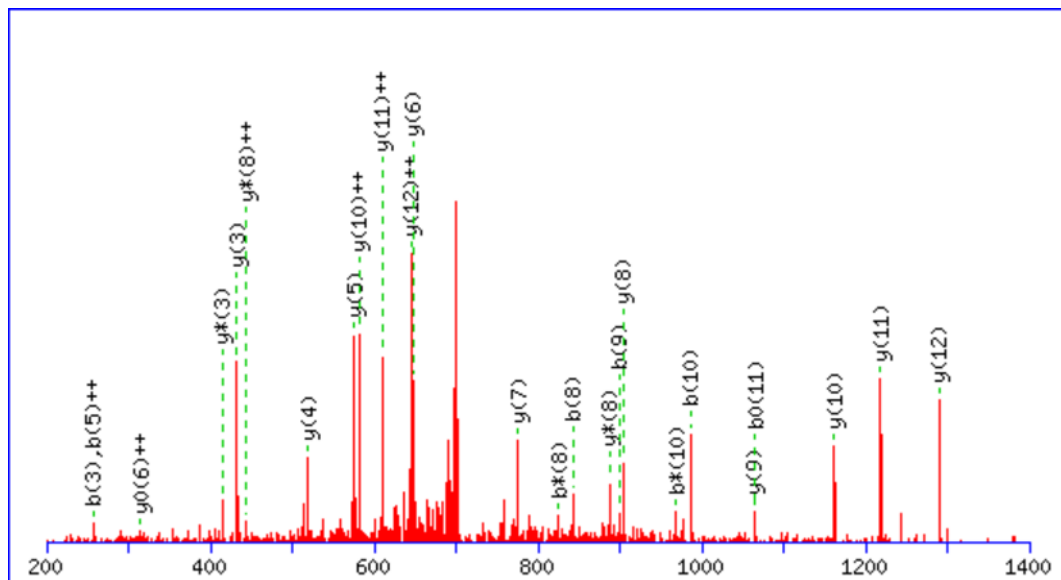

## Peptide View

MS/MS Fragmentation of **GLAEAAGPR**

Found in **IPI00290826**, Tax\_Id=9606 Gene\_Symbol=FAM174A Membrane protein FAM174A

**Experiment:** 47 - PyA-2 **Fraction:** PyA-2

Match to Query 1079: 840.445448 from(421.230000,2+)

Title: OECHL100312\_01.3741.3741.2.dta

Data file \\BOROMIR\Masse\Data LTQ-Orbitrap\Chrystelle Lacroix\Etude clinique sJPU\OECHL100312\_01.raw

**Monoisotopic mass of neutral peptide Mr(calc):** 840.445343 **Fixed modifications:** Carbamidomethyl (C) (apply to specified residues or termini only) **Ions Score:**

51 **Expect:** 0.00053 **Matches :** 10/64 fragment ions using 14 most intense peaks ([help](#))

| # | b                 | b <sup>++</sup> | b <sup>0</sup> | b <sup>0++</sup> | Seq. | y                 | y <sup>++</sup> | y <sup>*</sup> | y <sup>*++</sup> | y <sup>0</sup> | y <sup>0++</sup> | # |
|---|-------------------|-----------------|----------------|------------------|------|-------------------|-----------------|----------------|------------------|----------------|------------------|---|
| 1 | 58.028740         | 29.518008       |                |                  | G    |                   |                 |                |                  |                |                  | 9 |
| 2 | <b>171.112804</b> | 86.060040       |                |                  | L    | 784.431179        | 392.719228      | 767.404630     | 384.205953       | 766.420614     | 383.713945       | 8 |
| 3 | <b>242.149918</b> | 121.578597      |                |                  | A    | <b>671.347115</b> | 336.177196      | 654.320566     | 327.663921       | 653.336550     | 327.171913       | 7 |
| 4 | 371.192511        | 186.099894      | 353.181946     | 177.094611       | E    | <b>600.310001</b> | 300.658639      | 583.283452     | 292.145364       | 582.299436     | 291.653356       | 6 |
| 5 | 442.229625        | 221.618450      | 424.219060     | 212.613168       | A    | <b>471.267408</b> | 236.137342      | 454.240859     | 227.624067       |                |                  | 5 |

|   |            |            |            |            |   |            |            |            |            |  |  |   |
|---|------------|------------|------------|------------|---|------------|------------|------------|------------|--|--|---|
| 6 | 513.266739 | 257.137008 | 495.256174 | 248.131725 | A | 400.230294 | 200.618785 | 383.203745 | 192.105510 |  |  | 4 |
| 7 | 570.288203 | 285.647740 | 552.277638 | 276.642457 | G | 329.193180 | 165.100228 | 312.166631 | 156.586953 |  |  | 3 |
| 8 | 667.340967 | 334.174122 | 649.330402 | 325.168839 | P | 272.171716 | 136.589496 | 255.145167 | 128.076221 |  |  | 2 |
| 9 |            |            |            |            | R | 175.118952 | 88.063114  | 158.092403 | 79.549839  |  |  | 1 |

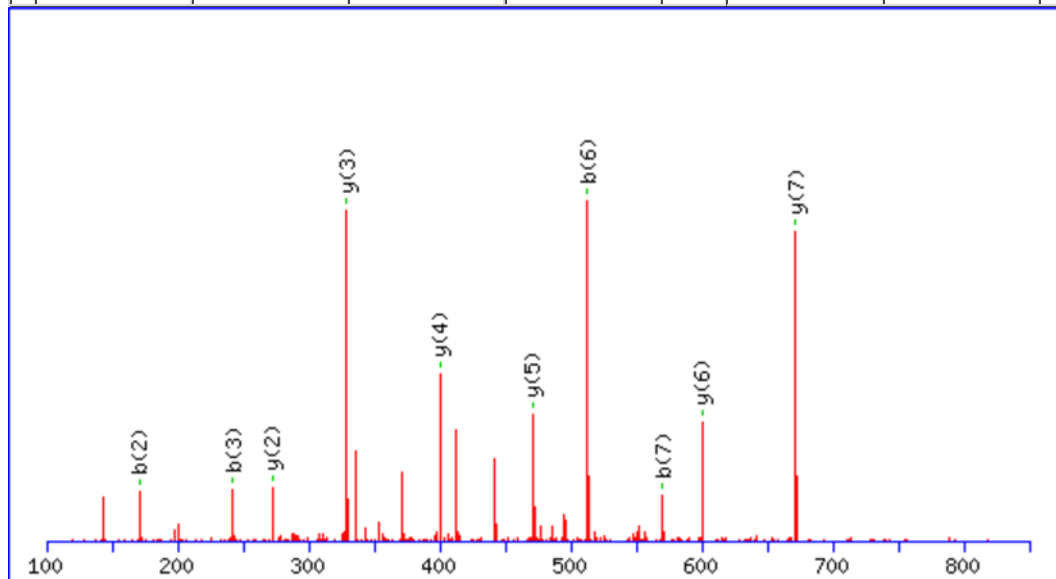

## Peptide View

MS/MS Fragmentation of **NIEMTQSPSSLSASVGDR**

Found in **IPI00387025**, Tax\_Id=9606 Gene\_Symbol=- Ig kappa chain V-I region DEE

Experiment: 47 - PyA-2 Fraction: PyA-2

Match to Query 13589: 1877.879048 from(939.946800,2+)

Title: OECHL100312\_01.12702.12702.2.dta

Data file \\BOROMIR\Masse\Data LTQ-Orbitrap\Chrystelle Lacroix\Etude clinique sJPU\OECHL100312\_01.raw

**Monoisotopic mass of neutral peptide Mr(calc): 1877.878891** Fixed modifications: Carbamidomethyl (C) (apply to specified residues or termini only) Ions

Score: 60 Expect: 0.00015 Matches : 21/198 fragment ions using 32 most intense peaks ([help](#))

| # | b          | b <sup>++</sup> | b*        | b <sup>*++</sup> | b <sup>0</sup> | b <sup>0++</sup> | Seq. | y | y <sup>++</sup> | y* | y <sup>*++</sup> | y <sup>0</sup> | y <sup>0++</sup> |
|---|------------|-----------------|-----------|------------------|----------------|------------------|------|---|-----------------|----|------------------|----------------|------------------|
| 1 | 115.050203 | 58.028740       | 98.023654 | 49.515465        |                |                  | N    |   |                 |    |                  |                |                  |

|    |             |            |             |            |             |            |   |             |            |             |            |             |          |
|----|-------------|------------|-------------|------------|-------------|------------|---|-------------|------------|-------------|------------|-------------|----------|
| 2  | 228.134267  | 114.570771 | 211.107718  | 106.057497 |             |            | I | 1764.843254 | 882.925265 | 1747.816705 | 874.411991 | 1746.832689 | 873.9199 |
| 3  | 357.176860  | 179.092068 | 340.150311  | 170.578793 | 339.166295  | 170.086785 | E | 1651.759190 | 826.383233 | 1634.732641 | 817.869959 | 1633.748625 | 817.3779 |
| 4  | 488.217345  | 244.612310 | 471.190796  | 236.099036 | 470.206780  | 235.607028 | M | 1522.716597 | 761.861937 | 1505.690048 | 753.348662 | 1504.706032 | 752.8566 |
| 5  | 589.265024  | 295.136150 | 572.238475  | 286.622876 | 571.254459  | 286.130868 | T | 1391.676112 | 696.341694 | 1374.649563 | 687.828420 | 1373.665547 | 687.3364 |
| 6  | 717.323602  | 359.165439 | 700.297053  | 350.652165 | 699.313037  | 350.160157 | Q | 1290.628433 | 645.817855 | 1273.601884 | 637.304580 | 1272.617868 | 636.8125 |
| 7  | 804.355630  | 402.681453 | 787.329081  | 394.168179 | 786.345065  | 393.676171 | S | 1162.569855 | 581.788566 | 1145.543306 | 573.275291 | 1144.559290 | 572.7832 |
| 8  | 901.408394  | 451.207835 | 884.381845  | 442.694561 | 883.397829  | 442.202553 | P | 1075.537827 | 538.272552 | 1058.511278 | 529.759277 | 1057.527262 | 529.2672 |
| 9  | 988.440422  | 494.723849 | 971.413873  | 486.210575 | 970.429857  | 485.718567 | S | 978.485063  | 489.746170 | 961.458514  | 481.232895 | 960.474498  | 480.7408 |
| 10 | 1075.472450 | 538.239863 | 1058.445901 | 529.726589 | 1057.461885 | 529.234580 | S | 891.453035  | 446.230156 | 874.426486  | 437.716881 | 873.442470  | 437.2248 |
| 11 | 1188.556514 | 594.781895 | 1171.529965 | 586.268621 | 1170.545949 | 585.776612 | L | 804.421007  | 402.714142 | 787.394458  | 394.200867 | 786.410442  | 393.7088 |
| 12 | 1275.588542 | 638.297909 | 1258.561993 | 629.784635 | 1257.577977 | 629.292626 | S | 691.336943  | 346.172110 | 674.310394  | 337.658835 | 673.326378  | 337.1668 |
| 13 | 1346.625656 | 673.816466 | 1329.599107 | 665.303192 | 1328.615091 | 664.811183 | A | 604.304915  | 302.656096 | 587.278366  | 294.142821 | 586.294350  | 293.6508 |
| 14 | 1433.657684 | 717.332480 | 1416.631135 | 708.819206 | 1415.647119 | 708.327198 | S | 533.267801  | 267.137539 | 516.241252  | 258.624264 | 515.257236  | 258.1322 |
| 15 | 1532.726098 | 766.866687 | 1515.699549 | 758.353413 | 1514.715533 | 757.861405 | V | 446.235773  | 223.621524 | 429.209224  | 215.108250 | 428.225208  | 214.6162 |
| 16 | 1589.747562 | 795.377419 | 1572.721013 | 786.864145 | 1571.736997 | 786.372137 | G | 347.167359  | 174.087317 | 330.140810  | 165.574043 | 329.156794  | 165.0820 |
| 17 | 1704.774505 | 852.890891 | 1687.747956 | 844.377616 | 1686.763940 | 843.885608 | D | 290.145895  | 145.576585 | 273.119346  | 137.063311 | 272.135330  | 136.5713 |
| 18 |             |            |             |            |             |            | R | 175.118952  | 88.063114  | 158.092403  | 79.549839  |             |          |

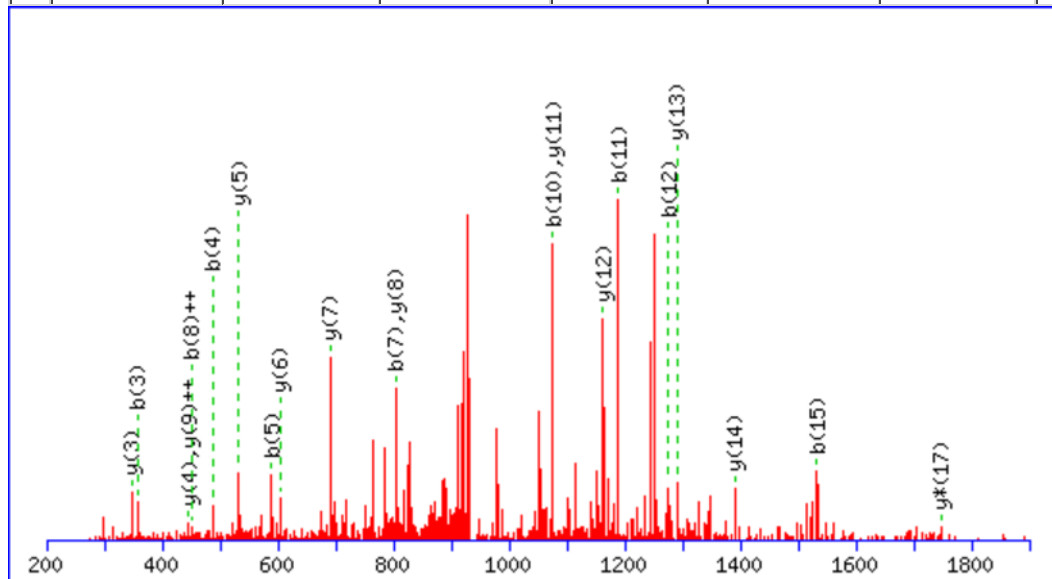



## Peptide View

MS/MS Fragmentation of **SNAQGIDLNR**

Found in **IPI00031121**, Tax\_Id=9606 Gene\_Symbol=CPE Carboxypeptidase E precursor

Experiment: 47 - PyA-2 Fraction: PyA-2

Match to Query 4263: 1086.545048 from(544.279800,2+)

Title: OECHL100312\_01.5733.5733.2.dta

Data file \\BOROMIR\Masse\Data LTQ-Orbitrap\Chrystelle Lacroix\Etude clinique sJPU\OECHL100312\_01.raw

**Monoisotopic mass of neutral peptide Mr(calc):** 1086.541763**Fixed modifications:** Carbamidomethyl (C) (apply to specified residues or termini only)**Ions**

**Score:** 55 **Expect:** 0.00038**Matches :** 20/100 fragment ions using 37 most intense peaks ([help](#))

| #  | b                 | b <sup>++</sup> | b*                | b <sup>*++</sup> | b <sup>0</sup> | b <sup>0++</sup> | Seq. | y                 | y <sup>++</sup>   | y*         | y <sup>*++</sup> | y <sup>0</sup> | y <sup>0++</sup> | #  |
|----|-------------------|-----------------|-------------------|------------------|----------------|------------------|------|-------------------|-------------------|------------|------------------|----------------|------------------|----|
| 1  | 88.039304         | 44.523290       |                   |                  | 70.028739      | 35.518008        | S    |                   |                   |            |                  |                |                  | 10 |
| 2  | <b>202.082231</b> | 101.544753      | <b>185.055682</b> | 93.031479        | 184.071666     | 92.539471        | N    | 1000.517033       | 500.762155        | 983.490484 | 492.248880       | 982.506468     | 491.756872       | 9  |
| 3  | <b>273.119345</b> | 137.063311      | <b>256.092796</b> | 128.550036       | 255.108780     | 128.058028       | A    | <b>886.474106</b> | <b>443.740691</b> | 869.447557 | 435.227416       | 868.463541     | 434.735408       | 8  |
| 4  | <b>401.177923</b> | 201.092600      | 384.151374        | 192.579325       | 383.167358     | 192.087317       | Q    | <b>815.436992</b> | 408.222134        | 798.410443 | 399.708859       | 797.426427     | 399.216851       | 7  |
| 5  | <b>458.199387</b> | 229.603332      | 441.172838        | 221.090057       | 440.188822     | 220.598049       | G    | <b>687.378414</b> | 344.192845        | 670.351865 | 335.679570       | 669.367849     | 335.187562       | 6  |
| 6  | <b>571.283451</b> | 286.145364      | 554.256902        | 277.632089       | 553.272886     | 277.140081       | I    | <b>630.356950</b> | 315.682113        | 613.330401 | 307.168838       | 612.346385     | 306.676830       | 5  |
| 7  | <b>686.310394</b> | 343.658835      | 669.283845        | 335.145560       | 668.299829     | 334.653552       | D    | <b>517.272886</b> | 259.140081        | 500.246337 | 250.626806       | 499.262321     | 250.134798       | 4  |
| 8  | <b>799.394458</b> | 400.200867      | <b>782.367909</b> | 391.687592       | 781.383893     | 391.195585       | L    | <b>402.245943</b> | <b>201.626609</b> | 385.219394 | 193.113335       |                |                  | 3  |
| 9  | 913.437385        | 457.222331      | 896.410836        | 448.709056       | 895.426820     | 448.217048       | N    | <b>289.161879</b> | 145.084577        | 272.135330 | 136.571303       |                |                  | 2  |
| 10 |                   |                 |                   |                  |                |                  | R    | <b>175.118952</b> | 88.063114         | 158.092403 | 79.549839        |                |                  | 1  |

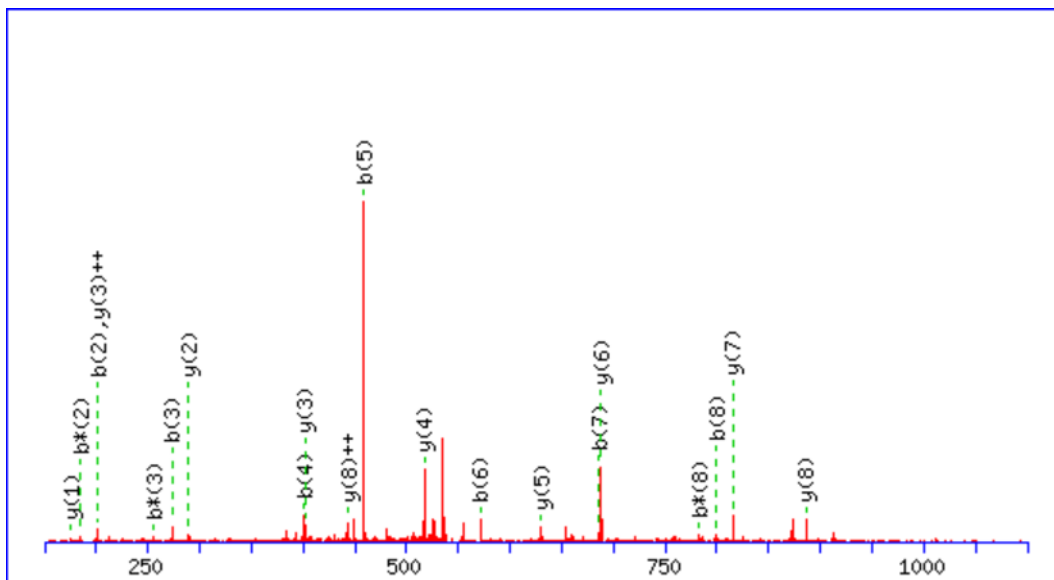

## Peptide View

MS/MS Fragmentation of **VLGIVVQNTK**

Found in **IPI00397949**, Tax\_Id=9606 Gene\_Symbol=GPR56 Isoform 2 of G-protein coupled receptor 56

**Experiment:** 47 - PyA-2 **Fraction:** PyA-2

Match to Query 4019: 1069.650648 from(535.832600,2+)

Title: OECHL100312\_01.11128.11128.2.dta

Data file \\BOROMIR\Masse\Data LTQ-Orbitrap\Chrystelle Lacroix\Etude clinique sJPU\OECHL100312\_01.raw

**Monoisotopic mass of neutral peptide Mr(calc):** 1069.649551 **Fixed modifications:** Carbamidomethyl (C) (apply to specified residues or termini only) **Ions**

**Score:** 52 **Expect:** 0.00016 **Matches :** 18/78 fragment ions using 36 most intense peaks ([help](#))

| # | b                 | b <sup>++</sup> | b* | b <sup>*++</sup> | b <sup>0</sup> | b <sup>0++</sup> | Seq. | y                 | y <sup>++</sup> | y*         | y <sup>*++</sup> | y <sup>0</sup> | y <sup>0++</sup> | #  |
|---|-------------------|-----------------|----|------------------|----------------|------------------|------|-------------------|-----------------|------------|------------------|----------------|------------------|----|
| 1 | 100.075690        | 50.541483       |    |                  |                |                  | V    |                   |                 |            |                  |                |                  | 10 |
| 2 | <b>213.159754</b> | 107.083515      |    |                  |                |                  | L    | <b>971.588408</b> | 486.297842      | 954.561859 | 477.784568       | 953.577843     | 477.292560       | 9  |
| 3 | <b>270.181218</b> | 135.594247      |    |                  |                |                  | G    | <b>858.504344</b> | 429.755810      | 841.477795 | 421.242536       | 840.493779     | 420.750528       | 8  |
| 4 | <b>383.265282</b> | 192.136279      |    |                  |                |                  | I    | <b>801.482880</b> | 401.245078      | 784.456331 | 392.731804       | 783.472315     | 392.239796       | 7  |
| 5 | <b>482.333696</b> | 241.670486      |    |                  |                |                  | V    | <b>688.398816</b> | 344.703046      | 671.372267 | 336.189772       | 670.388251     | 335.697764       | 6  |

|    |                   |                   |            |                   |            |                   |   |                   |            |            |            |            |            |   |
|----|-------------------|-------------------|------------|-------------------|------------|-------------------|---|-------------------|------------|------------|------------|------------|------------|---|
| 6  | <b>581.402110</b> | 291.204693        |            |                   |            |                   | V | <b>589.330402</b> | 295.168839 | 572.303853 | 286.655565 | 571.319837 | 286.163557 | 5 |
| 7  | <b>709.460688</b> | <b>355.233982</b> | 692.434139 | 346.720708        |            |                   | Q | <b>490.261988</b> | 245.634632 | 473.235439 | 237.121357 | 472.251423 | 236.629349 | 4 |
| 8  | 823.503615        | 412.255446        | 806.477066 | 403.742171        |            |                   | N | <b>362.203410</b> | 181.605343 | 345.176861 | 173.092068 | 344.192845 | 172.600060 | 3 |
| 9  | <b>924.551294</b> | 462.779285        | 907.524745 | <b>454.266011</b> | 906.540729 | <b>453.774003</b> | T | <b>248.160483</b> | 124.583879 | 231.133934 | 116.070605 | 230.149918 | 115.578597 | 2 |
| 10 |                   |                   |            |                   |            |                   | K | 147.112804        | 74.060040  | 130.086255 | 65.546765  |            |            | 1 |

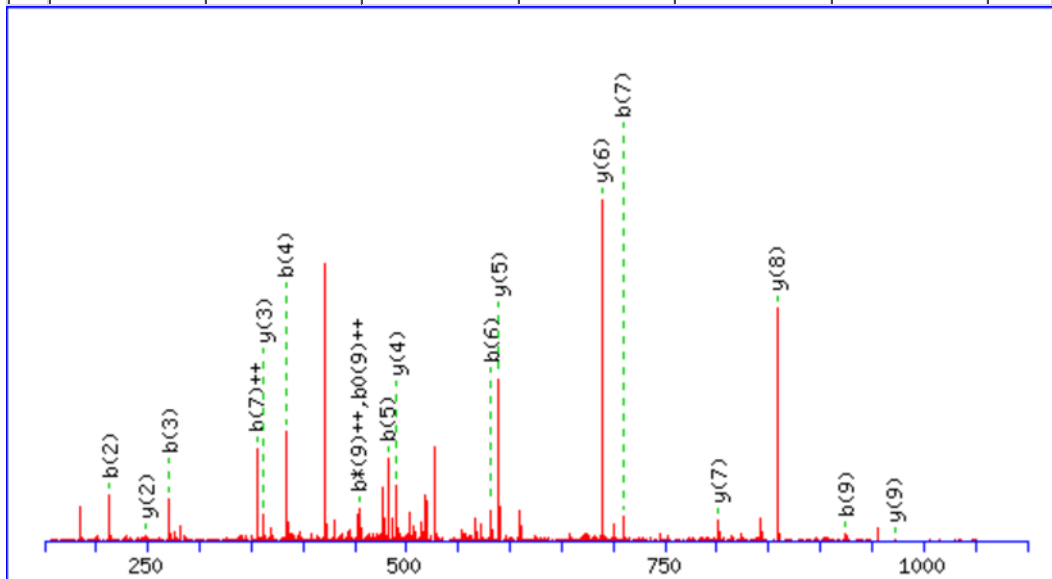

## Peptide View

MS/MS Fragmentation of **HGSGLGHSSSHGQHGSGR**

Found in **IPI00398625**, Tax\_Id=9606 Gene\_Symbol=HRNR Hornerin

Experiment: 47 - PyA-2 Fraction: PyA-2

Match to Query 13653: 1884.832872 from(629.284900,3+)

Title: OECHL100312\_01.1168.1168.3.dta

Data file \\BOROMIR\Masse\Data LTQ-Orbitrap\Chrystelle Lacroix\Etude clinique sJPU\OECHL100312\_01.raw

**Monoisotopic mass of neutral peptide Mr(calc):** 1884.832413 **Fixed modifications:** Carbamidomethyl (C) (apply to specified residues or termini only) **Ions**

**Score:** 50 **Expect:** 0.0008 **Matches :** 25/196 fragment ions using 43 most intense peaks ([help](#))

| # | b | b <sup>++</sup> | b <sup>*</sup> | b <sup>*++</sup> | b <sup>0</sup> | b <sup>0++</sup> | Seq. | y | y <sup>++</sup> | y <sup>*</sup> | y <sup>*++</sup> | y <sup>0</sup> | y <sup>0++</sup> |
|---|---|-----------------|----------------|------------------|----------------|------------------|------|---|-----------------|----------------|------------------|----------------|------------------|
|---|---|-----------------|----------------|------------------|----------------|------------------|------|---|-----------------|----------------|------------------|----------------|------------------|

|           |                    |                   |             |            |                   |            |          |                    |                   |             |            |             |          |
|-----------|--------------------|-------------------|-------------|------------|-------------------|------------|----------|--------------------|-------------------|-------------|------------|-------------|----------|
| <b>1</b>  | 138.066188         | 69.536732         |             |            |                   |            | <b>H</b> |                    |                   |             |            |             |          |
| <b>2</b>  | <b>195.087652</b>  | 98.047464         |             |            |                   |            | <b>G</b> | 1748.780746        | <b>874.894011</b> | 1731.754197 | 866.380736 | 1730.770181 | 865.8887 |
| <b>3</b>  | <b>282.119680</b>  | 141.563478        |             |            | <b>264.109115</b> | 132.558195 | <b>S</b> | 1691.759282        | <b>846.383279</b> | 1674.732733 | 837.870004 | 1673.748717 | 837.3779 |
| <b>4</b>  | 339.141144         | 170.074210        |             |            | 321.130579        | 161.068927 | <b>G</b> | 1604.727254        | <b>802.867265</b> | 1587.700705 | 794.353990 | 1586.716689 | 793.8619 |
| <b>5</b>  | <b>452.225208</b>  | 226.616242        |             |            | 434.214643        | 217.610959 | <b>L</b> | 1547.705790        | 774.356533        | 1530.679241 | 765.843258 | 1529.695225 | 765.3512 |
| <b>6</b>  | <b>509.246672</b>  | 255.126974        |             |            | 491.236107        | 246.121691 | <b>G</b> | 1434.621726        | <b>717.814501</b> | 1417.595177 | 709.301226 | 1416.611161 | 708.8092 |
| <b>7</b>  | 646.305584         | 323.656430        |             |            | 628.295019        | 314.651147 | <b>H</b> | 1377.600262        | <b>689.303769</b> | 1360.573713 | 680.790494 | 1359.589697 | 680.2984 |
| <b>8</b>  | 733.337612         | 367.172444        |             |            | 715.327047        | 358.167161 | <b>S</b> | <b>1240.541350</b> | 620.774313        | 1223.514801 | 612.261038 | 1222.530785 | 611.7690 |
| <b>9</b>  | 820.369640         | 410.688458        |             |            | 802.359075        | 401.683175 | <b>S</b> | <b>1153.509322</b> | <b>577.258299</b> | 1136.482773 | 568.745024 | 1135.498757 | 568.2530 |
| <b>10</b> | <b>907.401668</b>  | 454.204472        |             |            | <b>889.391103</b> | 445.199189 | <b>S</b> | 1066.477294        | 533.742285        | 1049.450745 | 525.229010 | 1048.466729 | 524.7370 |
| <b>11</b> | <b>1044.460580</b> | 522.733928        |             |            | 1026.450015       | 513.728645 | <b>H</b> | <b>979.445266</b>  | 490.226271        | 962.418717  | 481.712996 | 961.434701  | 481.2209 |
| <b>12</b> | <b>1101.482044</b> | 551.244660        |             |            | 1083.471479       | 542.239377 | <b>G</b> | 842.386354         | <b>421.696815</b> | 825.359805  | 413.183540 | 824.375789  | 412.6915 |
| <b>13</b> | <b>1229.540622</b> | 615.273949        | 1212.514073 | 606.760674 | 1211.530057       | 606.268666 | <b>Q</b> | 785.364890         | 393.186083        | 768.338341  | 384.672808 | 767.354325  | 384.1808 |
| <b>14</b> | 1366.599534        | <b>683.803405</b> | 1349.572985 | 675.290130 | 1348.588969       | 674.798122 | <b>H</b> | 657.306312         | <b>329.156794</b> | 640.279763  | 320.643519 | 639.295747  | 320.1515 |
| <b>15</b> | 1423.620998        | 712.314137        | 1406.594449 | 703.800862 | 1405.610433       | 703.308854 | <b>G</b> | <b>520.247400</b>  | 260.627338        | 503.220851  | 252.114063 | 502.236835  | 251.6220 |
| <b>16</b> | 1510.653026        | 755.830151        | 1493.626477 | 747.316876 | 1492.642461       | 746.824868 | <b>S</b> | <b>463.225936</b>  | 232.116606        | 446.199387  | 223.603331 | 445.215371  | 223.1113 |
| <b>17</b> | 1567.674490        | 784.340883        | 1550.647941 | 775.827608 | 1549.663925       | 775.335600 | <b>G</b> | <b>376.193908</b>  | 188.600592        | 359.167359  | 180.087317 | 358.183343  | 179.5953 |
| <b>18</b> | 1654.706518        | 827.856897        | 1637.679969 | 819.343622 | 1636.695953       | 818.851614 | <b>S</b> | 319.172444         | 160.089860        | 302.145895  | 151.576585 | 301.161879  | 151.0845 |
| <b>19</b> | 1711.727982        | 856.367629        | 1694.701433 | 847.854354 | 1693.717417       | 847.362346 | <b>G</b> | 232.140416         | 116.573846        | 215.113867  | 108.060571 |             |          |
| <b>20</b> |                    |                   |             |            |                   |            | <b>R</b> | 175.118952         | 88.063114         | 158.092403  | 79.549839  |             |          |

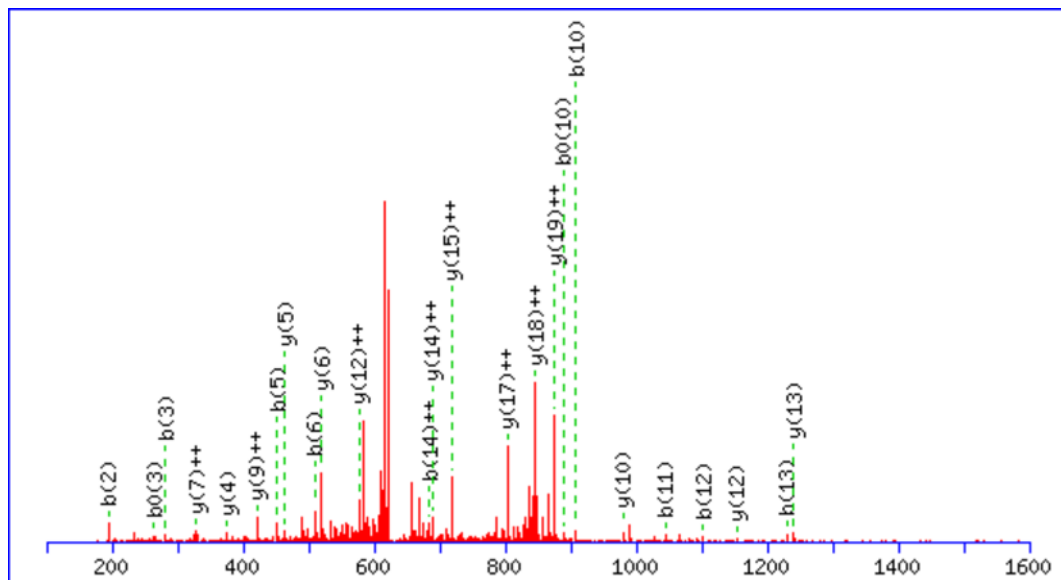

## Peptide View

MS/MS Fragmentation of **NPVLQQDAHSSVTITPQR**

Found in **IPI00410488**, Tax\_Id=9606 Gene\_Symbol=CD276 Isoform 1 of CD276 antigen

**Experiment:** 46 - PyA-1 **Fraction:** PyA-1

Match to Query 14631: 1990.025248 from(996.019900,2+)

Title: OECHL100310\_07.9358.9358.2.dta

Data file \\BOROMIR\Masse\Data LTQ-Orbitrap\Chrystelle Lacroix\Etude clinique sJPU\OECHL100310\_07.raw

**Monoisotopic mass of neutral peptide Mr(calc):** 1990.023209 **Fixed modifications:** Carbamidomethyl (C) (apply to specified residues or termini only) **Ions**

**Score:** 97 **Expect:** 3e-008 **Matches :** 42/186 fragment ions using 67 most intense peaks ([help](#))

| # | b                 | b <sup>++</sup> | b <sup>*</sup>    | b <sup>*++</sup> | b <sup>0</sup> | b <sup>0++</sup> | Seq. | y                  | y <sup>++</sup>   | y <sup>*</sup> | y <sup>*++</sup>  | y <sup>0</sup> | y <sup>0++</sup> |
|---|-------------------|-----------------|-------------------|------------------|----------------|------------------|------|--------------------|-------------------|----------------|-------------------|----------------|------------------|
| 1 | 115.050203        | 58.028740       | 98.023654         | 49.515465        |                |                  | N    |                    |                   |                |                   |                |                  |
| 2 | 212.102967        | 106.555121      | 195.076418        | 98.041847        |                |                  | P    | 1876.987553        | 938.997415        | 1859.961004    | 930.484140        | 1858.976988    | 929.9921         |
| 3 | <b>311.171381</b> | 156.089328      | 294.144832        | 147.576054       |                |                  | V    | <b>1779.934789</b> | 890.471033        | 1762.908240    | 881.957758        | 1761.924224    | 881.4657         |
| 4 | <b>424.255445</b> | 212.631361      | <b>407.228896</b> | 204.118086       |                |                  | L    | <b>1680.866375</b> | <b>840.936826</b> | 1663.839826    | 832.423551        | 1662.855810    | 831.9315         |
| 5 | 552.314023        | 276.660650      | <b>535.287474</b> | 268.147375       |                |                  | Q    | <b>1567.782311</b> | 784.394794        | 1550.755762    | <b>775.881519</b> | 1549.771746    | <b>775.3895</b>  |

|    |                    |                   |                    |                   |                    |                   |   |                    |                   |                   |            |             |                 |
|----|--------------------|-------------------|--------------------|-------------------|--------------------|-------------------|---|--------------------|-------------------|-------------------|------------|-------------|-----------------|
| 6  | <b>680.372601</b>  | 340.689939        | 663.346052         | 332.176664        |                    |                   | Q | <b>1439.723733</b> | 720.365505        | 1422.697184       | 711.852230 | 1421.713168 | 711.3602        |
| 7  | 795.399544         | 398.203410        | 778.372995         | 389.690136        | 777.388979         | 389.198128        | D | <b>1311.665155</b> | 656.336215        | 1294.638606       | 647.822941 | 1293.654590 | 647.3309        |
| 8  | <b>866.436658</b>  | 433.721967        | 849.410109         | 425.208693        | 848.426093         | <b>424.716685</b> | A | <b>1196.638212</b> | 598.822744        | 1179.611663       | 590.309470 | 1178.627647 | 589.8174        |
| 9  | 1003.495570        | <b>502.251423</b> | 986.469021         | 493.738149        | 985.485005         | 493.246141        | H | <b>1125.601098</b> | 563.304187        | 1108.574549       | 554.790913 | 1107.590533 | 554.2989        |
| 10 | <b>1090.527598</b> | 545.767437        | 1073.501049        | 537.254163        | 1072.517033        | 536.762155        | S | <b>988.542186</b>  | 494.774731        | 971.515637        | 486.261457 | 970.531621  | <b>485.7694</b> |
| 11 | 1177.559626        | 589.283451        | 1160.533077        | 580.770177        | 1159.549061        | 580.278169        | S | <b>901.510158</b>  | 451.258717        | 884.483609        | 442.745443 | 883.499593  | 442.2534        |
| 12 | <b>1276.628040</b> | 638.817658        | 1259.601491        | 630.304384        | <b>1258.617475</b> | 629.812376        | V | <b>814.478130</b>  | <b>407.742703</b> | 797.451581        | 399.229428 | 796.467565  | 398.7374        |
| 13 | 1377.675719        | 689.341498        | <b>1360.649170</b> | <b>680.828223</b> | 1359.665154        | <b>680.336215</b> | T | <b>715.409716</b>  | 358.208496        | 698.383167        | 349.695221 | 697.399151  | 349.2032        |
| 14 | <b>1490.759783</b> | 745.883530        | <b>1473.733234</b> | 737.370255        | <b>1472.749218</b> | 736.878247        | I | <b>614.362037</b>  | 307.684656        | 597.335488        | 299.171382 | 596.351472  | 298.6793        |
| 15 | <b>1591.807462</b> | 796.407369        | 1574.780913        | 787.894095        | <b>1573.796897</b> | 787.402087        | T | <b>501.277973</b>  | 251.142624        | 484.251424        | 242.629350 | 483.267408  | 242.1373        |
| 16 | 1688.860226        | 844.933751        | 1671.833677        | 836.420477        | 1670.849661        | 835.928469        | P | <b>400.230294</b>  | 200.618785        | <b>383.203745</b> | 192.105510 |             |                 |
| 17 | <b>1816.918804</b> | 908.963040        | 1799.892255        | 900.449766        | <b>1798.908239</b> | 899.957758        | Q | 303.177530         | 152.092403        | 286.150981        | 143.579128 |             |                 |
| 18 |                    |                   |                    |                   |                    |                   | R | 175.118952         | 88.063114         | 158.092403        | 79.549839  |             |                 |

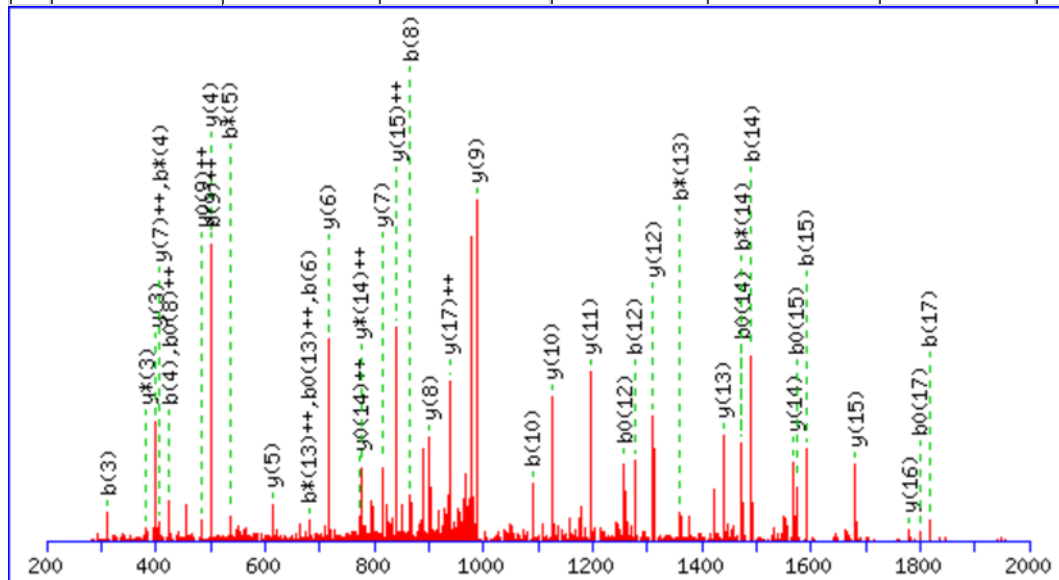

## Peptide View

MS/MS Fragmentation of **SDAAVDTSSSEITTK**Found in **IPI00412977**, Tax\_Id=9606 Gene\_Symbol=- Prothymosin alpha**Experiment:** 46 - PyA-1 **Fraction:** PyA-1

Match to Query 9394: 1465.678648 from(733.846600,2+)

Title: OECHL100310\_07.9397.9397.2.dta

Data file \\BOROMIR\Masse\Data LTQ-Orbitrap\Chrystelle Lacroix\Etude clinique sJPU\OECHL100310\_07.raw

**Monoisotopic mass of neutral peptide Mr(calc):** 1465.678391**Fixed modifications:** Carbamidomethyl (C) (apply to specified residues or termini only)**Variable****modifications:** N-term : Acetyl (N-term)**Ions Score:** 85 **Expect:** 2.7e-007**Matches :** 23/128 fragment ions using 37 most intense peaks ([help](#))

| #  | b           | b <sup>++</sup> | b <sup>0</sup> | b <sup>0++</sup> | Seq. | y           | y <sup>++</sup> | y*          | y <sup>*++</sup> | y <sup>0</sup> | y <sup>0++</sup> | #  |
|----|-------------|-----------------|----------------|------------------|------|-------------|-----------------|-------------|------------------|----------------|------------------|----|
| 1  | 130.049869  | 65.528572       | 112.039304     | 56.523290        | S    |             |                 |             |                  |                |                  | 14 |
| 2  | 245.076812  | 123.042044      | 227.066247     | 114.036761       | D    | 1337.643082 | 669.325179      | 1320.616533 | 660.811905       | 1319.632517    | 660.319897       | 13 |
| 3  | 316.113926  | 158.560601      | 298.103361     | 149.555319       | A    | 1222.616139 | 611.811708      | 1205.589590 | 603.298433       | 1204.605574    | 602.806425       | 12 |
| 4  | 387.151040  | 194.079158      | 369.140475     | 185.073875       | A    | 1151.579025 | 576.293151      | 1134.552476 | 567.779876       | 1133.568460    | 567.287868       | 11 |
| 5  | 486.219454  | 243.613365      | 468.208889     | 234.608082       | V    | 1080.541911 | 540.774594      | 1063.515362 | 532.261319       | 1062.531346    | 531.769311       | 10 |
| 6  | 601.246397  | 301.126837      | 583.235832     | 292.121554       | D    | 981.473497  | 491.240387      | 964.446948  | 482.727112       | 963.462932     | 482.235104       | 9  |
| 7  | 702.294076  | 351.650676      | 684.283511     | 342.645394       | T    | 866.446554  | 433.726915      | 849.420005  | 425.213641       | 848.435989     | 424.721633       | 8  |
| 8  | 789.326104  | 395.166690      | 771.315539     | 386.161408       | S    | 765.398875  | 383.203076      | 748.372326  | 374.689801       | 747.388310     | 374.197793       | 7  |
| 9  | 876.358132  | 438.682704      | 858.347567     | 429.677421       | S    | 678.366847  | 339.687062      | 661.340298  | 331.173787       | 660.356282     | 330.681779       | 6  |
| 10 | 1005.400725 | 503.204001      | 987.390160     | 494.198718       | E    | 591.334819  | 296.171048      | 574.308270  | 287.657773       | 573.324254     | 287.165765       | 5  |
| 11 | 1118.484789 | 559.746033      | 1100.474224    | 550.740750       | I    | 462.292226  | 231.649751      | 445.265677  | 223.136477       | 444.281661     | 222.644469       | 4  |
| 12 | 1219.532468 | 610.269872      | 1201.521903    | 601.264590       | T    | 349.208162  | 175.107719      | 332.181613  | 166.594445       | 331.197597     | 166.102437       | 3  |
| 13 | 1320.580147 | 660.793712      | 1302.569582    | 651.788429       | T    | 248.160483  | 124.583879      | 231.133934  | 116.070605       | 230.149918     | 115.578597       | 2  |
| 14 |             |                 |                |                  | K    | 147.112804  | 74.060040       | 130.086255  | 65.546765        |                |                  | 1  |

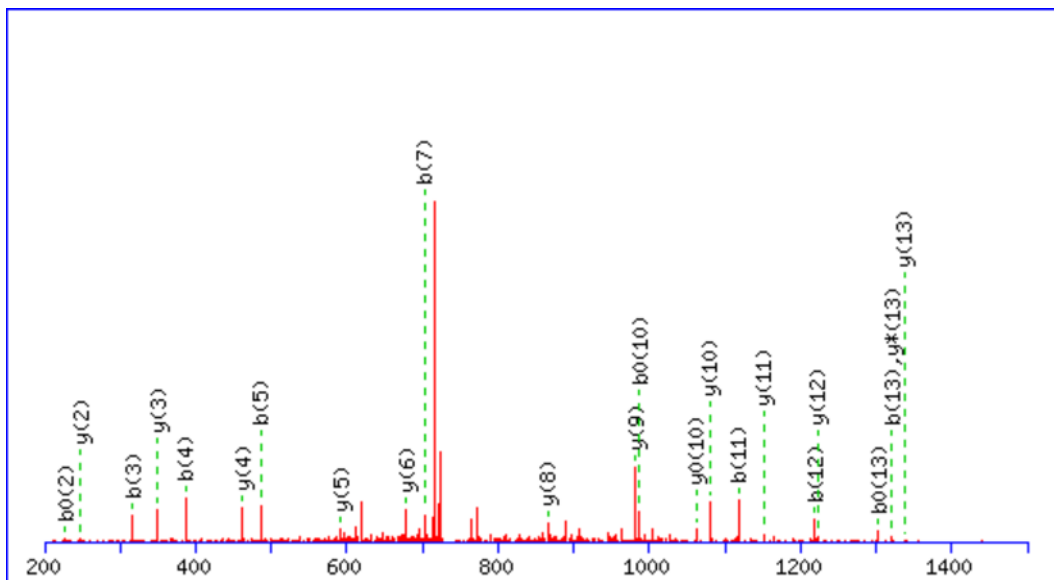

## Peptide View

MS/MS Fragmentation of **CPLQDFLR**

Found in **IPI0003807**, Tax\_Id=9606 Gene\_Symbol=ACP2 Lysosomal acid phosphatase

**Experiment:** 46 - PyA-1 **Fraction:** PyA-1

Match to Query 4049: 1047.516248 from(524.765400,2+)

Title: OECHL100310\_07.16473.16473.2.dta

Data file \\BOROMIR\Masse\Data LTQ-Orbitrap\Chrystelle Lacroix\Etude clinique sJPU\OECHL100310\_07.raw

**Monoisotopic mass of neutral peptide Mr(calc):** 1047.517151 **Fixed modifications:** Carbamidomethyl (C) (apply to specified residues or termini only) **Ions**

**Score:** 71 **Expect:** 7.6e-006 **Matches :** 8/64 fragment ions using 9 most intense peaks ([help](#))

| # | b          | b <sup>++</sup> | b*         | b <sup>*++</sup> | b <sup>0</sup> | b <sup>0++</sup> | Seq. | y          | y <sup>++</sup> | y*         | y <sup>*++</sup> | y <sup>0</sup> | y <sup>0++</sup> | # |
|---|------------|-----------------|------------|------------------|----------------|------------------|------|------------|-----------------|------------|------------------|----------------|------------------|---|
| 1 | 161.037925 | 81.022600       |            |                  |                |                  | C    |            |                 |            |                  |                |                  | 8 |
| 2 | 258.090689 | 129.548982      |            |                  |                |                  | P    | 888.493779 | 444.750528      | 871.467230 | 436.237253       | 870.483214     | 435.745245       | 7 |
| 3 | 371.174753 | 186.091015      |            |                  |                |                  | L    | 791.441015 | 396.224146      | 774.414466 | 387.710871       | 773.430450     | 387.218863       | 6 |
| 4 | 499.233331 | 250.120304      | 482.206782 | 241.607029       |                |                  | Q    | 678.356951 | 339.682114      | 661.330402 | 331.168839       | 660.346386     | 330.676831       | 5 |
| 5 | 614.260274 | 307.633775      | 597.233725 | 299.120501       | 596.249709     | 298.628493       | D    | 550.298373 | 275.652825      | 533.271824 | 267.139550       | 532.287808     | 266.647542       | 4 |



|   |            |            |            |            |            |            |   |            |            |            |            |  |  |   |
|---|------------|------------|------------|------------|------------|------------|---|------------|------------|------------|------------|--|--|---|
| 6 | 761.328688 | 381.167982 | 744.302139 | 372.654708 | 743.318123 | 372.162700 | F | 435.271430 | 218.139353 | 418.244881 | 209.626079 |  |  | 3 |
| 7 | 874.412752 | 437.710014 | 857.386203 | 429.196740 | 856.402187 | 428.704732 | L | 288.203016 | 144.605146 | 271.176467 | 136.091872 |  |  | 2 |
| 8 |            |            |            |            |            |            | R | 175.118952 | 88.063114  | 158.092403 | 79.549840  |  |  | 1 |

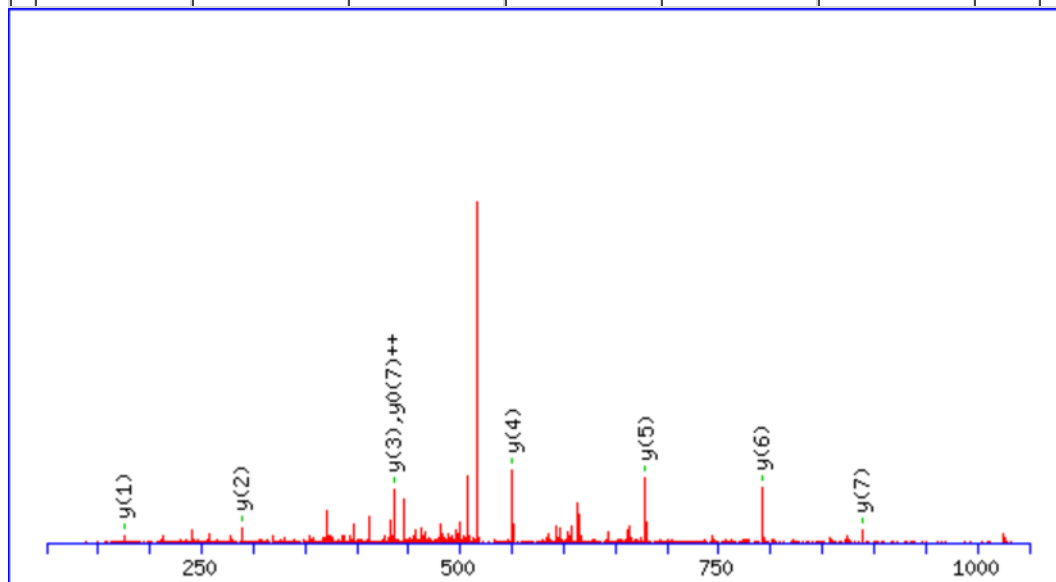

## Peptide View

MS/MS Fragmentation of **QLGPQPQDIYYEDGVVPTDRR**

Found in **IPI00015199**, Tax\_Id=9606 Gene\_Symbol=CD7 T-cell antigen CD7

**Experiment:** 46 - PyA-1 **Fraction:** PyA-1

Match to Query 18029: 2659.324872 from(887.448900,3+)

Title: OECHL100310\_07.17060.17060.3.dta

Data file \\BOROMIR\Masse\Data LTQ-Orbitrap\Chrystelle Lacroix\Etude clinique sJPU\OECHL100310\_07.raw

**Monoisotopic mass of neutral peptide Mr(calc):** 2659.324203 **Fixed modifications:** Carbamidomethyl (C) (apply to specified residues or termini only) **Ions**

**Score:** 63 **Expect:** 0.0001 **Matches :** 37/246 fragment ions using 86 most intense peaks ([help](#))

| # | b          | b <sup>++</sup> | b*         | b <sup>*++</sup> | b <sup>0</sup> | b <sup>0++</sup> | Seq. | y           | y <sup>++</sup> | y*          | y <sup>*++</sup> | y <sup>0</sup> |     |
|---|------------|-----------------|------------|------------------|----------------|------------------|------|-------------|-----------------|-------------|------------------|----------------|-----|
| 1 | 129.065854 | 65.036565       | 112.039305 | 56.523291        |                |                  | Q    |             |                 |             |                  |                |     |
| 2 | 242.149918 | 121.578597      | 225.123369 | 113.065323       |                |                  | L    | 2532.272897 | 1266.640086     | 2515.246348 | 1258.126812      | 2514.262332    | 12: |

|    |                    |             |                    |                    |                    |             |          |                    |                    |                   |                    |             |     |
|----|--------------------|-------------|--------------------|--------------------|--------------------|-------------|----------|--------------------|--------------------|-------------------|--------------------|-------------|-----|
| 3  | <b>299.171382</b>  | 150.089329  | 282.144833         | 141.576055         |                    |             | <b>G</b> | 2419.188833        | <b>1210.098054</b> | 2402.162284       | 1201.584780        | 2401.178268 | 121 |
| 4  | <b>396.224146</b>  | 198.615711  | 379.197597         | 190.102436         |                    |             | <b>P</b> | 2362.167369        | <b>1181.587322</b> | 2345.140820       | 1173.074048        | 2344.156804 | 117 |
| 5  | 524.282724         | 262.645000  | <b>507.256175</b>  | 254.131726         |                    |             | <b>Q</b> | 2265.114605        | <b>1133.060940</b> | 2248.088056       | <b>1124.547666</b> | 2247.104040 | 112 |
| 6  | 621.335488         | 311.171382  | 604.308939         | 302.658108         |                    |             | <b>P</b> | 2137.056027        | <b>1069.031651</b> | 2120.029478       | 1060.518377        | 2119.045462 | 106 |
| 7  | 749.394066         | 375.200671  | 732.367517         | 366.687397         |                    |             | <b>Q</b> | 2040.003263        | <b>1020.505269</b> | 2022.976714       | 1011.991995        | 2021.992698 | 101 |
| 8  | 864.421009         | 432.714143  | 847.394460         | 424.200868         | 846.410444         | 423.708860  | <b>D</b> | 1911.944685        | <b>956.475980</b>  | 1894.918136       | 947.962706         | 1893.934120 | 947 |
| 9  | 977.505073         | 489.256175  | <b>960.478524</b>  | 480.742900         | 959.494508         | 480.250892  | <b>I</b> | 1796.917742        | <b>898.962509</b>  | 1779.891193       | 890.449234         | 1778.907177 | 890 |
| 10 | 1090.589137        | 545.798206  | <b>1073.562588</b> | 537.284932         | 1072.578572        | 536.792924  | <b>I</b> | 1683.833678        | 842.420477         | 1666.807129       | 833.907202         | 1665.823113 | 833 |
| 11 | 1253.652466        | 627.329871  | 1236.625917        | 618.816597         | 1235.641901        | 618.324589  | <b>Y</b> | 1570.749614        | <b>785.878445</b>  | 1553.723065       | 777.365170         | 1552.739049 | 777 |
| 12 | <b>1416.715795</b> | 708.861536  | <b>1399.689246</b> | 700.348261         | <b>1398.705230</b> | 699.856253  | <b>Y</b> | 1407.686285        | <b>704.346780</b>  | 1390.659736       | 695.833506         | 1389.675720 | 695 |
| 13 | 1545.758388        | 773.382832  | 1528.731839        | 764.869558         | <b>1527.747823</b> | 764.377549  | <b>E</b> | 1244.622956        | <b>622.815116</b>  | 1227.596407       | 614.301841         | 1226.612391 | 614 |
| 14 | <b>1660.785331</b> | 830.896304  | <b>1643.758782</b> | 822.383029         | <b>1642.774766</b> | 821.891021  | <b>D</b> | 1115.580363        | 558.293819         | 1098.553814       | 549.780545         | 1097.569798 | 549 |
| 15 | 1717.806795        | 859.407036  | <b>1700.780246</b> | 850.893761         | 1699.796230        | 850.401753  | <b>G</b> | <b>1000.553420</b> | <b>500.780348</b>  | 983.526871        | 492.267073         | 982.542855  | 492 |
| 16 | 1816.875209        | 908.941243  | <b>1799.848660</b> | 900.427968         | <b>1798.864644</b> | 899.935960  | <b>V</b> | 943.531956         | 472.269616         | 926.505407        | 463.756341         | 925.521391  | 463 |
| 17 | 1915.943623        | 958.475450  | <b>1898.917074</b> | 949.962175         | <b>1897.933058</b> | 949.470167  | <b>V</b> | 844.463542         | <b>422.735409</b>  | 827.436993        | 414.222134         | 826.452977  | 414 |
| 18 | 2012.996387        | 1007.001832 | 1995.969838        | 998.488557         | 1994.985822        | 997.996549  | <b>P</b> | <b>745.395128</b>  | <b>373.201202</b>  | <b>728.368579</b> | 364.687927         | 727.384563  | 364 |
| 19 | 2114.044066        | 1057.525671 | 2097.017517        | 1049.012396        | 2096.033501        | 1048.520388 | <b>T</b> | 648.342364         | <b>324.674820</b>  | 631.315815        | 316.161545         | 630.331799  | 316 |
| 20 | 2215.091745        | 1108.049510 | 2198.065196        | 1099.536236        | 2197.081180        | 1099.044228 | <b>T</b> | 547.294685         | 274.150980         | 530.268136        | 265.637706         | 529.284120  | 265 |
| 21 | 2330.118688        | 1165.562982 | 2313.092139        | 1157.049707        | 2312.108123        | 1156.557699 | <b>D</b> | 446.247006         | 223.627141         | 429.220457        | 215.113866         | 428.236441  | 215 |
| 22 | 2486.219799        | 1243.613537 | 2469.193250        | <b>1235.100263</b> | 2468.209234        | 1234.608255 | <b>R</b> | <b>331.220063</b>  | 166.113669         | 314.193514        | 157.600395         |             |     |
| 23 |                    |             |                    |                    |                    |             | <b>R</b> | 175.118952         | 88.063114          | 158.092403        | 79.549839          |             |     |

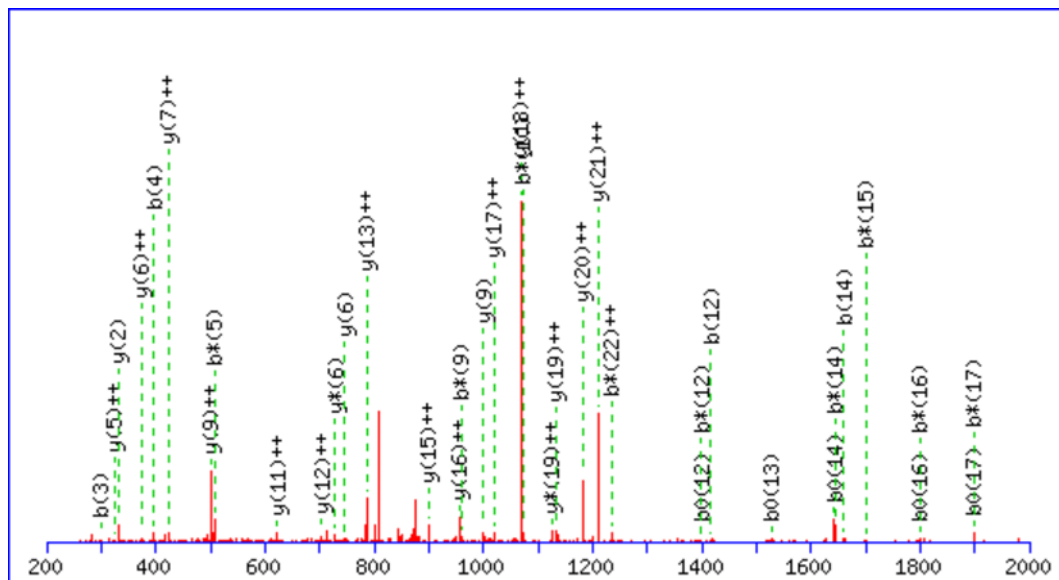

## Peptide View

MS/MS Fragmentation of **SKEDSNSTESKSSSEEDGQLK**

Found in **IPI00012734**, Tax\_Id=9606 Gene\_Symbol=DMP1 Isoform 1 of Dentin matrix acidic phosphoprotein 1

**Experiment:** 46 - PyA-1 **Fraction:** PyA-1

Match to Query 16232: 2270.999448 from(1136.507000,2+)

Title: OECHL100310\_07.2094.2094.2.dta

Data file \\BOROMIR\Masse\Data LTQ-Orbitrap\Chrystelle Lacroix\Etude clinique sJPU\OECHL100310\_07.raw

**Monoisotopic mass of neutral peptide Mr(calc):** 2270.998581 **Fixed modifications:** Carbamidomethyl (C) (apply to specified residues or termini only) **Ions**

**Score:** 100 **Expect:** 9.9e-009 **Matches :** 37/230 fragment ions using 68 most intense peaks ([help](#))

| # | b                 | b <sup>++</sup> | b <sup>*</sup> | b <sup>*++</sup> | b <sup>0</sup> | b <sup>0++</sup> | Seq. | y                  | y <sup>++</sup>   | y <sup>*</sup> | y <sup>*++</sup>  | y <sup>0</sup> |    |
|---|-------------------|-----------------|----------------|------------------|----------------|------------------|------|--------------------|-------------------|----------------|-------------------|----------------|----|
| 1 | 88.039304         | 44.523290       |                |                  | 70.028739      | 35.518008        | S    |                    |                   |                |                   |                |    |
| 2 | 216.134267        | 108.570771      | 199.107718     | 100.057497       | 198.123702     | 99.565489        | K    | 2184.973868        | 1092.990572       | 2167.947319    | 1084.477297       | 2166.963303    | 10 |
| 3 | 345.176860        | 173.092068      | 328.150311     | 164.578793       | 327.166295     | 164.086785       | E    | 2056.878905        | 1028.943090       | 2039.852356    | 1020.429816       | 2038.868340    | 10 |
| 4 | <b>460.203803</b> | 230.605539      | 443.177254     | 222.092265       | 442.193238     | 221.600257       | D    | <b>1927.836312</b> | 964.421794        | 1910.809763    | 955.908520        | 1909.825747    | 9  |
| 5 | <b>547.235831</b> | 274.121554      | 530.209282     | 265.608279       | 529.225266     | 265.116271       | S    | <b>1812.809369</b> | <b>906.908323</b> | 1795.782820    | <b>898.395048</b> | 1794.798804    | 8  |

|    |                    |                    |             |                   |                    |                   |   |                    |            |             |                   |                   |    |
|----|--------------------|--------------------|-------------|-------------------|--------------------|-------------------|---|--------------------|------------|-------------|-------------------|-------------------|----|
| 6  | 661.278758         | 331.143017         | 644.252209  | 322.629743        | 643.268193         | 322.137735        | N | <b>1725.777341</b> | 863.392309 | 1708.750792 | 854.879034        | 1707.766776       | 8: |
| 7  | <b>748.310786</b>  | 374.659031         | 731.284237  | <b>366.145757</b> | 730.300221         | 365.653749        | S | <b>1611.734414</b> | 806.370845 | 1594.707865 | 797.857571        | 1593.723849       | 7: |
| 8  | 849.358465         | 425.182871         | 832.331916  | 416.669596        | 831.347900         | 416.177588        | T | <b>1524.702386</b> | 762.854831 | 1507.675837 | 754.341557        | 1506.691821       | 7: |
| 9  | <b>978.401058</b>  | 489.704167         | 961.374509  | 481.190893        | 960.390493         | 480.698885        | E | <b>1423.654707</b> | 712.330992 | 1406.628158 | 703.817717        | 1405.644142       | 7: |
| 10 | 1065.433086        | 533.220181         | 1048.406537 | 524.706907        | 1047.422521        | 524.214899        | S | <b>1294.612114</b> | 647.809695 | 1277.585565 | 639.296421        | 1276.601549       | 6: |
| 11 | <b>1193.528049</b> | 597.267663         | 1176.501500 | 588.754388        | 1175.517484        | 588.262380        | K | <b>1207.580086</b> | 604.293681 | 1190.553537 | 595.780407        | 1189.569521       | 5: |
| 12 | 1280.560077        | 640.783677         | 1263.533528 | 632.270402        | 1262.549512        | 631.778394        | S | <b>1079.485123</b> | 540.246200 | 1062.458574 | 531.732925        | 1061.474558       | 5: |
| 13 | <b>1367.592105</b> | 684.299691         | 1350.565556 | 675.786416        | 1349.581540        | 675.294408        | S | <b>992.453095</b>  | 496.730186 | 975.426546  | 488.216911        | 974.442530        | 4: |
| 14 | <b>1454.624133</b> | 727.815705         | 1437.597584 | 719.302430        | 1436.613568        | 718.810422        | S | <b>905.421067</b>  | 453.214172 | 888.394518  | 444.700897        | 887.410502        | 4: |
| 15 | <b>1583.666726</b> | 792.337001         | 1566.640177 | 783.823727        | 1565.656161        | 783.331719        | E | <b>818.389039</b>  | 409.698158 | 801.362490  | <b>401.184883</b> | 800.378474        | 4: |
| 16 | <b>1712.709319</b> | 856.858298         | 1695.682770 | 848.345023        | 1694.698754        | 847.853015        | E | <b>689.346446</b>  | 345.176861 | 672.319897  | 336.663587        | <b>671.335881</b> | 3: |
| 17 | <b>1827.736262</b> | 914.371769         | 1810.709713 | <b>905.858495</b> | <b>1809.725697</b> | <b>905.366487</b> | D | <b>560.303853</b>  | 280.655565 | 543.277304  | 272.142290        | 542.293288        | 2: |
| 18 | 1884.757726        | 942.882501         | 1867.731177 | 934.369227        | 1866.747161        | 933.877219        | G | <b>445.276910</b>  | 223.142093 | 428.250361  | 214.628818        |                   |    |
| 19 | 2012.816304        | <b>1006.911790</b> | 1995.789755 | 998.398516        | 1994.805739        | 997.906508        | Q | <b>388.255446</b>  | 194.631361 | 371.228897  | 186.118087        |                   |    |
| 20 | 2125.900368        | <b>1063.453822</b> | 2108.873819 | 1054.940547       | 2107.889803        | 1054.448539       | L | 260.196868         | 130.602072 | 243.170319  | 122.088798        |                   |    |
| 21 |                    |                    |             |                   |                    |                   | K | 147.112804         | 74.060040  | 130.086255  | 65.546765         |                   |    |

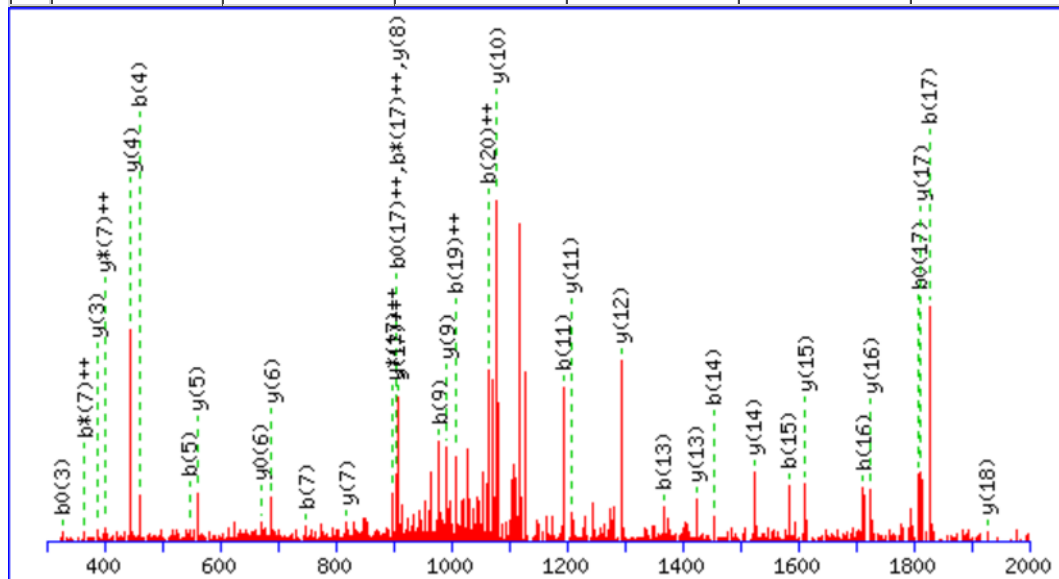

## Peptide View

MS/MS Fragmentation of **AHGQESAI FNEVAPGYFSR**

Found in **IPI00170635**, Tax\_Id=9606 Gene\_Symbol=SECTM1 Secreted and transmembrane protein 1

**Experiment:** 46 - PyA-1 **Fraction:** PyA-1

Match to Query 15146: 2078.981448 from(1040.498000,2+)

Title: OECHL100310\_07.16719.16719.2.dta

Data file \\BOROMIR\Masse\Data LTQ-Orbitrap\Chrystelle Lacroix\Etude clinique sJPU\OECHL100310\_07.raw

**Monoisotopic mass of neutral peptide Mr(calc):** 2078.980988**Fixed modifications:** Carbamidomethyl (C) (apply to specified residues or termini only)**Ions**

**Score:** 74 **Expect:** 7.3e-006**Matches :** 35/200 fragment ions using 68 most intense peaks ([help](#))

| #  | b                  | b <sup>++</sup>   | b <sup>*</sup>    | b <sup>*++</sup> | b <sup>0</sup>    | b <sup>0++</sup> | Seq. | y                  | y <sup>++</sup> | y <sup>*</sup>     | y <sup>*++</sup>  | y <sup>0</sup>     | y <sup>0++</sup> |
|----|--------------------|-------------------|-------------------|------------------|-------------------|------------------|------|--------------------|-----------------|--------------------|-------------------|--------------------|------------------|
| 1  | 72.044390          | 36.525833         |                   |                  |                   |                  | A    |                    |                 |                    |                   |                    |                  |
| 2  | 209.103302         | 105.055289        |                   |                  |                   |                  | H    | 2008.951166        | 1004.979221     | 1991.924617        | 996.465947        | 1990.940601        | 995.973          |
| 3  | 266.124766         | 133.566021        |                   |                  |                   |                  | G    | <b>1871.892254</b> | 936.449765      | 1854.865705        | 927.936491        | 1853.881689        | 927.444          |
| 4  | <b>394.183344</b>  | 197.595310        | <b>377.156795</b> | 189.082035       |                   |                  | Q    | 1814.870790        | 907.939033      | <b>1797.844241</b> | <b>899.425759</b> | <b>1796.860225</b> | <b>898.933</b>   |
| 5  | <b>523.225937</b>  | 262.116607        | 506.199388        | 253.603332       | 505.215372        | 253.111324       | E    | <b>1686.812212</b> | 843.909744      | 1669.785663        | 835.396470        | 1668.801647        | 834.904          |
| 6  | <b>610.257965</b>  | 305.632621        | 593.231416        | 297.119346       | <b>592.247400</b> | 296.627338       | S    | <b>1557.769619</b> | 779.388448      | 1540.743070        | 770.875173        | 1539.759054        | 770.383          |
| 7  | <b>681.295079</b>  | 341.151178        | <b>664.268530</b> | 332.637903       | <b>663.284514</b> | 332.145895       | A    | <b>1470.737591</b> | 735.872434      | 1453.711042        | <b>727.359159</b> | 1452.727026        | <b>726.867</b>   |
| 8  | <b>794.379143</b>  | 397.693210        | 777.352594        | 389.179935       | 776.368578        | 388.687927       | I    | <b>1399.700477</b> | 700.353877      | 1382.673928        | 691.840602        | 1381.689912        | 691.348          |
| 9  | <b>941.447557</b>  | 471.227417        | 924.421008        | 462.714142       | 923.436992        | 462.222134       | F    | <b>1286.616413</b> | 643.811845      | 1269.589864        | 635.298570        | 1268.605848        | 634.806          |
| 10 | 1055.490484        | 528.248880        | 1038.463935       | 519.735606       | 1037.479919       | 519.243597       | N    | <b>1139.547999</b> | 570.277638      | 1122.521450        | 561.764363        | 1121.537434        | 561.272          |
| 11 | <b>1184.533077</b> | 592.770176        | 1167.506528       | 584.256902       | 1166.522512       | 583.764894       | E    | <b>1025.505072</b> | 513.256174      | 1008.478523        | 504.742900        | 1007.494507        | 504.250          |
| 12 | <b>1283.601491</b> | 642.304383        | 1266.574942       | 633.791109       | 1265.590926       | 633.299101       | V    | <b>896.462479</b>  | 448.734878      | 879.435930         | 440.221603        | 878.451914         | 439.729          |
| 13 | <b>1354.638605</b> | 677.822940        | 1337.612056       | 669.309666       | 1336.628040       | 668.817658       | A    | <b>797.394065</b>  | 399.200671      | 780.367516         | 390.687396        | 779.383500         | 390.195          |
| 14 | 1451.691369        | <b>726.349322</b> | 1434.664820       | 717.836048       | 1433.680804       | 717.344040       | P    | <b>726.356951</b>  | 363.682114      | 709.330402         | 355.168839        | 708.346386         | 354.676          |
| 15 | <b>1508.712833</b> | 754.860054        | 1491.686284       | 746.346780       | 1490.702268       | 745.854772       | G    | 629.304187         | 315.155732      | 612.277638         | 306.642457        | 611.293622         | 306.150          |
| 16 | <b>1671.776162</b> | 836.391719        | 1654.749613       | 827.878445       | 1653.765597       | 827.386436       | Y    | <b>572.282723</b>  | 286.645000      | 555.256174         | 278.131725        | 554.272158         | 277.639          |
| 17 | 1818.844576        | 909.925926        | 1801.818027       | 901.412652       | 1800.834011       | 900.920643       | F    | <b>409.219394</b>  | 205.113335      | 392.192845         | 196.600061        | 391.208829         | 196.108          |
| 18 | 1905.876604        | 953.441940        | 1888.850055       | 944.928666       | 1887.866039       | 944.436658       | S    | 262.150980         | 131.579128      | 245.124431         | 123.065854        | 244.140415         | 122.573          |

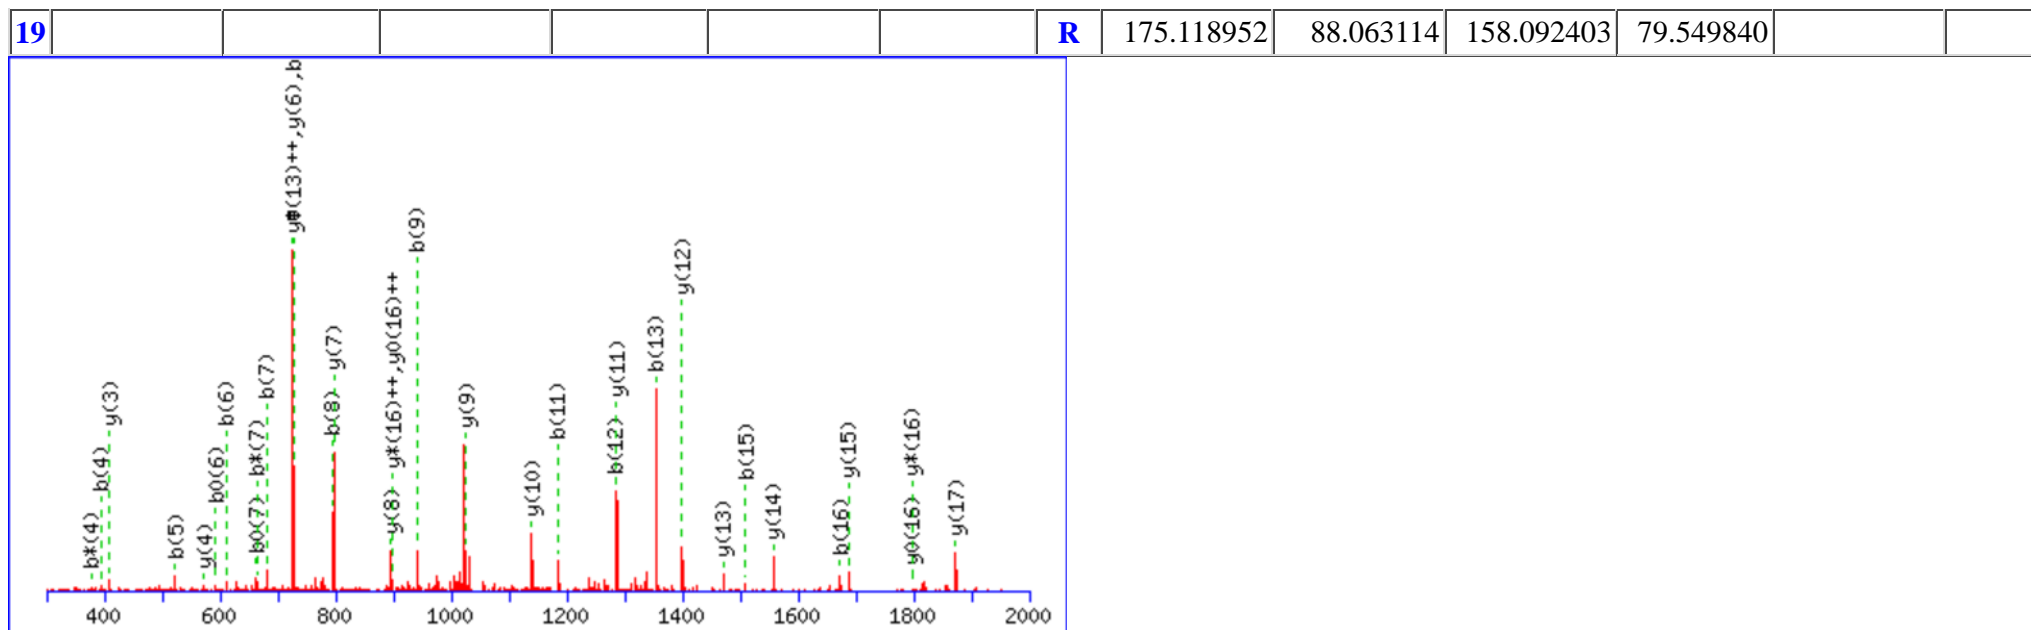

## Peptide View

MS/MS Fragmentation of **TPAFAESVTEGDVRWEK**

Found in **IPI00384016**, Tax\_Id=9606 Gene\_Symbol=DLSTP;DLST Full-length cDNA 5-PRIME end of clone CS0DJ009YL13 of T cells (Jurkat cell line) of Homo sapiens (Fragment)

**Experiment:** 46 - PyA-1 **Fraction:** PyA-1

Match to Query 14064: 1920.923248 from(961.468900,2+)

Title: OECHL100310\_07.14707.14707.2.dta

Data file \\BOROMIR\Masse\Data LTQ-Orbitrap\Chrystelle Lacroix\Etude clinique sJPU\OECHL100310\_07.raw

**Monoisotopic mass of neutral peptide Mr(calc):** 1920.921753 **Fixed modifications:** Carbamidomethyl (C) (apply to specified residues or termini only) **Ions**

**Score:** 63 **Expect:** 8.2e-005 **Matches :** 29/164 fragment ions using 64 most intense peaks ([help](#))

| # | b          | b <sup>++</sup> | b* | b <sup>*++</sup> | b <sup>0</sup> | b <sup>0++</sup> | Seq. | y                  | y <sup>++</sup>   | y*          | y <sup>*++</sup> | y <sup>0</sup> | y <sup>0++</sup> |
|---|------------|-----------------|----|------------------|----------------|------------------|------|--------------------|-------------------|-------------|------------------|----------------|------------------|
| 1 | 102.054955 | 51.531116       |    |                  | 84.044390      | 42.525833        | T    |                    |                   |             |                  |                |                  |
| 2 | 199.107719 | 100.057497      |    |                  | 181.097154     | 91.052215        | P    | 1820.881355        | 910.944316        | 1803.854806 | 902.431041       | 1802.870790    | 901.9390         |
| 3 | 270.144833 | 135.576055      |    |                  | 252.134268     | 126.570772       | A    | <b>1723.828591</b> | <b>862.417934</b> | 1706.802042 | 853.904659       | 1705.818026    | 853.4126         |

|    |                    |            |             |            |                   |            |   |                    |                   |                    |            |             |          |
|----|--------------------|------------|-------------|------------|-------------------|------------|---|--------------------|-------------------|--------------------|------------|-------------|----------|
| 4  | <b>417.213247</b>  | 209.110261 |             |            | 399.202682        | 200.104979 | F | <b>1652.791477</b> | <b>826.899377</b> | 1635.764928        | 818.386102 | 1634.780912 | 817.8940 |
| 5  | <b>488.250361</b>  | 244.628818 |             |            | <b>470.239796</b> | 235.623536 | A | <b>1505.723063</b> | <b>753.365170</b> | 1488.696514        | 744.851895 | 1487.712498 | 744.3598 |
| 6  | <b>617.292954</b>  | 309.150115 |             |            | <b>599.282389</b> | 300.144833 | E | <b>1434.685949</b> | <b>717.846612</b> | 1417.659400        | 709.333338 | 1416.675384 | 708.8413 |
| 7  | 704.324982         | 352.666129 |             |            | <b>686.314417</b> | 343.660846 | S | <b>1305.643356</b> | 653.325316        | <b>1288.616807</b> | 644.812042 | 1287.632791 | 644.3200 |
| 8  | 803.393396         | 402.200336 |             |            | <b>785.382831</b> | 393.195053 | V | <b>1218.611328</b> | 609.809302        | 1201.584779        | 601.296028 | 1200.600763 | 600.8040 |
| 9  | 904.441075         | 452.724176 |             |            | 886.430510        | 443.718893 | T | <b>1119.542914</b> | 560.275095        | <b>1102.516365</b> | 551.761821 | 1101.532349 | 551.2698 |
| 10 | <b>1033.483668</b> | 517.245472 |             |            | 1015.473103       | 508.240190 | E | <b>1018.495235</b> | 509.751256        | 1001.468686        | 501.237981 | 1000.484670 | 500.7459 |
| 11 | 1090.505132        | 545.756204 |             |            | 1072.494567       | 536.750922 | G | <b>889.452642</b>  | 445.229959        | 872.426093         | 436.716684 | 871.442077  | 436.2246 |
| 12 | <b>1205.532075</b> | 603.269676 |             |            | 1187.521510       | 594.264393 | D | 832.431178         | 416.719227        | 815.404629         | 408.205953 | 814.420613  | 407.7139 |
| 13 | 1304.600489        | 652.803883 |             |            | 1286.589924       | 643.798600 | V | <b>717.404235</b>  | 359.205756        | 700.377686         | 350.692481 | 699.393670  | 350.2004 |
| 14 | <b>1460.701600</b> | 730.854438 | 1443.675051 | 722.341164 | 1442.691035       | 721.849156 | R | <b>618.335821</b>  | 309.671548        | 601.309272         | 301.158274 | 600.325256  | 300.6662 |
| 15 | 1646.780913        | 823.894095 | 1629.754364 | 815.380820 | 1628.770348       | 814.888812 | W | <b>462.234710</b>  | 231.620993        | 445.208161         | 223.107718 | 444.224145  | 222.6157 |
| 16 | <b>1775.823506</b> | 888.415391 | 1758.796957 | 879.902117 | 1757.812941       | 879.410108 | E | 276.155397         | 138.581336        | 259.128848         | 130.068062 | 258.144832  | 129.5760 |
| 17 |                    |            |             |            |                   |            | K | 147.112804         | 74.060040         | 130.086255         | 65.546765  |             |          |

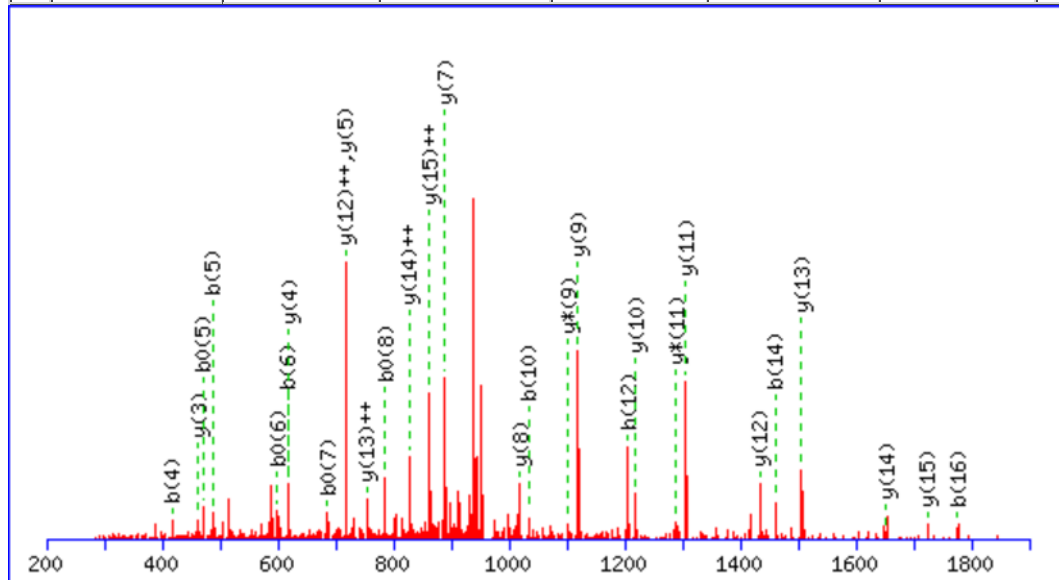

## Peptide View

MS/MS Fragmentation of **LLDPQNSNSPLTHGCLDSLASTTDCQAK**

Found in **IPI00011899**, Tax\_Id=9606 Gene\_Symbol=BAMBI BMP and activin membrane-bound inhibitor homolog

**Experiment:** 46 - PyA-1 **Fraction:** PyA-1

Match to Query 19305: 3155.489172 from(1052.837000,3+)

Title: OECHL100310\_07.16519.16519.3.dta

Data file \\BOROMIR\Masse\Data LTQ-Orbitrap\Chrystelle Lacroix\Etude clinique sJPU\OECHL100310\_07.raw

**Monoisotopic mass of neutral peptide Mr(calc):** 3155.486328**Fixed modifications:** Carbamidomethyl (C) (apply to specified residues or termini only)**Ions**

**Score:** 67 **Expect:** 3.9e-005**Matches :** 50/314 fragment ions using 102 most intense peaks ([help](#))

| #  | b           | b <sup>++</sup> | b*          | b <sup>*++</sup> | b <sup>0</sup> | b <sup>0++</sup> | Seq. | y           | y <sup>++</sup> | y*          | y <sup>*++</sup> | y <sup>0</sup> |    |
|----|-------------|-----------------|-------------|------------------|----------------|------------------|------|-------------|-----------------|-------------|------------------|----------------|----|
| 1  | 114.091340  | 57.549308       |             |                  |                |                  | L    |             |                 |             |                  |                |    |
| 2  | 227.175404  | 114.091340      |             |                  |                |                  | L    | 3043.409542 | 1522.208409     | 3026.382993 | 1513.695134      | 3025.398977    | 15 |
| 3  | 342.202347  | 171.604811      |             |                  | 324.191782     | 162.599529       | D    | 2930.325478 | 1465.666377     | 2913.298929 | 1457.153102      | 2912.314913    | 14 |
| 4  | 439.255111  | 220.131193      |             |                  | 421.244546     | 211.125911       | P    | 2815.298535 | 1408.152905     | 2798.271986 | 1399.639631      | 2797.287970    | 13 |
| 5  | 567.313689  | 284.160483      | 550.287140  | 275.647208       | 549.303124     | 275.155200       | Q    | 2718.245771 | 1359.626523     | 2701.219222 | 1351.113249      | 2700.235206    | 13 |
| 6  | 681.356616  | 341.181946      | 664.330067  | 332.668672       | 663.346051     | 332.176664       | N    | 2590.187193 | 1295.597234     | 2573.160644 | 1287.083960      | 2572.176628    | 12 |
| 7  | 768.388644  | 384.697960      | 751.362095  | 376.184686       | 750.378079     | 375.692678       | S    | 2476.144266 | 1238.575771     | 2459.117717 | 1230.062496      | 2458.133701    | 12 |
| 8  | 882.431571  | 441.719424      | 865.405022  | 433.206149       | 864.421006     | 432.714141       | N    | 2389.112238 | 1195.059757     | 2372.085689 | 1186.546482      | 2371.101673    | 11 |
| 9  | 969.463599  | 485.235437      | 952.437050  | 476.722163       | 951.453034     | 476.230155       | S    | 2275.069311 | 1138.038293     | 2258.042762 | 1129.525019      | 2257.058746    | 11 |
| 10 | 1066.516363 | 533.761820      | 1049.489814 | 525.248545       | 1048.505798    | 524.756537       | P    | 2188.037283 | 1094.522279     | 2171.010734 | 1086.009005      | 2170.026718    | 10 |
| 11 | 1179.600427 | 590.303851      | 1162.573878 | 581.790577       | 1161.589862    | 581.298569       | L    | 2090.984519 | 1045.995897     | 2073.957970 | 1037.482623      | 2072.973954    | 10 |
| 12 | 1280.648106 | 640.827691      | 1263.621557 | 632.314416       | 1262.637541    | 631.822408       | T    | 1977.900455 | 989.453866      | 1960.873906 | 980.940591       | 1959.889890    | 9  |
| 13 | 1417.707018 | 709.357147      | 1400.680469 | 700.843872       | 1399.696453    | 700.351864       | H    | 1876.852776 | 938.930026      | 1859.826227 | 930.416752       | 1858.842211    | 9  |
| 14 | 1474.728482 | 737.867879      | 1457.701933 | 729.354604       | 1456.717917    | 728.862596       | G    | 1739.793864 | 870.400570      | 1722.767315 | 861.887296       | 1721.783299    | 8  |
| 15 | 1634.759131 | 817.883203      | 1617.732582 | 809.369929       | 1616.748566    | 808.877921       | C    | 1682.772400 | 841.889838      | 1665.745851 | 833.376564       | 1664.761835    | 8  |
| 16 | 1747.843195 | 874.425235      | 1730.816646 | 865.911961       | 1729.832630    | 865.419953       | L    | 1522.741751 | 761.874514      | 1505.715202 | 753.361239       | 1504.731186    | 7  |
| 17 | 1862.870138 | 931.938707      | 1845.843589 | 923.425432       | 1844.859573    | 922.933424       | D    | 1409.657687 | 705.332482      | 1392.631138 | 696.819207       | 1391.647122    | 6  |
| 18 | 1949.902166 | 975.454721      | 1932.875617 | 966.941446       | 1931.891601    | 966.449438       | S    | 1294.630744 | 647.819010      | 1277.604195 | 639.305736       | 1276.620179    | 6  |
| 19 | 2062.986230 | 1031.996753     | 2045.959681 | 1023.483478      | 2044.975665    | 1022.991470      | L    | 1207.598716 | 604.302996      | 1190.572167 | 595.789722       | 1189.588151    | 5  |
| 20 | 2134.023344 | 1067.515310     | 2116.996795 | 1059.002035      | 2116.012779    | 1058.510027      | A    | 1094.514652 | 547.760964      | 1077.488103 | 539.247690       | 1076.504087    | 5  |



|    |             |                    |             |             |             |             |          |                    |            |             |                   |             |           |
|----|-------------|--------------------|-------------|-------------|-------------|-------------|----------|--------------------|------------|-------------|-------------------|-------------|-----------|
| 21 | 2221.055372 | <b>1111.031324</b> | 2204.028823 | 1102.518049 | 2203.044807 | 1102.026041 | <b>S</b> | <b>1023.477538</b> | 512.242407 | 1006.450989 | 503.729132        | 1005.466973 | 51        |
| 22 | 2322.103051 | <b>1161.555163</b> | 2305.076502 | 1153.041889 | 2304.092486 | 1152.549881 | <b>T</b> | 936.445510         | 468.726393 | 919.418961  | 460.213118        | 918.434945  | 4.        |
| 23 | 2423.150730 | 1212.079003        | 2406.124181 | 1203.565728 | 2405.140165 | 1203.073720 | <b>T</b> | <b>835.397831</b>  | 418.202554 | 818.371282  | <b>409.689279</b> | 817.387266  | <b>41</b> |
| 24 | 2538.177673 | 1269.592474        | 2521.151124 | 1261.079200 | 2520.167108 | 1260.587192 | <b>D</b> | <b>734.350152</b>  | 367.678714 | 717.323603  | 359.165440        | 716.339587  | 3:        |
| 25 | 2651.261737 | 1326.134506        | 2634.235188 | 1317.621232 | 2633.251172 | 1317.129224 | <b>I</b> | <b>619.323209</b>  | 310.165243 | 602.296660  | 301.651968        |             |           |
| 26 | 2811.292386 | 1406.149831        | 2794.265837 | 1397.636556 | 2793.281821 | 1397.144548 | <b>C</b> | <b>506.239145</b>  | 253.623211 | 489.212596  | 245.109936        |             |           |
| 27 | 2939.350964 | 1470.179120        | 2922.324415 | 1461.665845 | 2921.340399 | 1461.173837 | <b>Q</b> | 346.208496         | 173.607886 | 329.181947  | 165.094612        |             |           |
| 28 | 3010.388078 | <b>1505.697677</b> | 2993.361529 | 1497.184402 | 2992.377513 | 1496.692394 | <b>A</b> | 218.149918         | 109.578597 | 201.123369  | 101.065323        |             |           |
| 29 |             |                    |             |             |             |             | <b>K</b> | 147.112804         | 74.060040  | 130.086255  | 65.546765         |             |           |

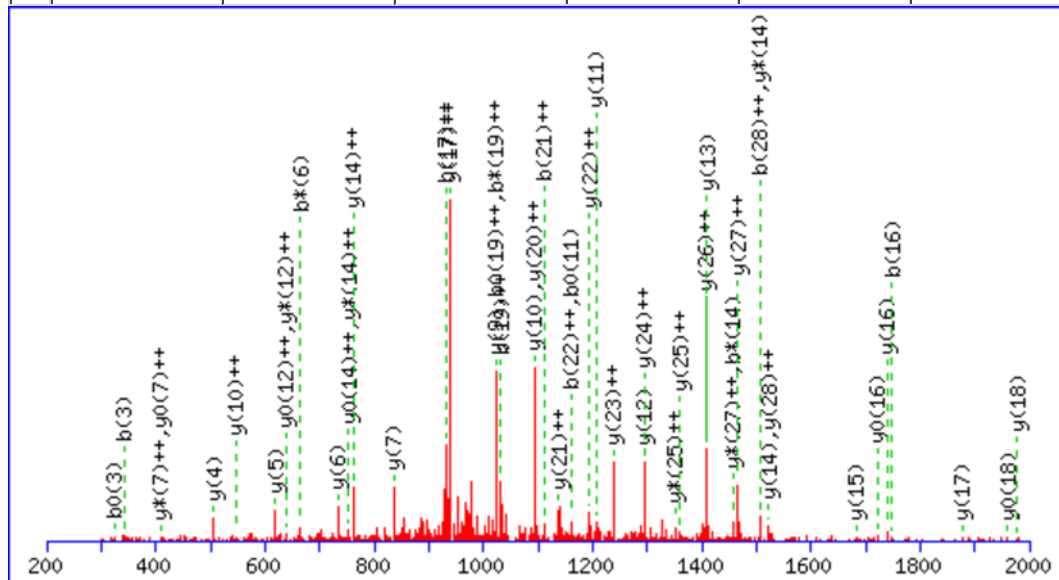

## Peptide View

MS/MS Fragmentation of **LLIYDASNLETGVPSR**

Found in **IPI00003111**, Tax\_Id=9606 Gene\_Symbol=LOC652694 Ig kappa chain V-I region AU

Experiment: 46 - PyA-1 Fraction: PyA-1

Match to Query 12624: 1746.916248 from(874.465400,2+)

Title: OECHL100310\_07.16607.16607.2.dta

Data file \\BOROMIR\Masse\Data LTQ-Orbitrap\Chrystelle Lacroix\Etude clinique sJPU\OECHL100310\_07.raw

**Monoisotopic mass of neutral peptide Mr(calc): 1746.915192**Fixed modifications: Carbamidomethyl (C) (apply to specified residues or termini only)**Ions****Score: 88** **Expect: 1.6e-007** **Matches : 29/156** fragment ions using 42 most intense peaks ([help](#))

| #  | <b>b</b>           | <b>b<sup>++</sup></b> | <b>b<sup>*</sup></b> | <b>b<sup>*++</sup></b> | <b>b<sup>0</sup></b> | <b>b<sup>0++</sup></b> | Seq. | <b>y</b>           | <b>y<sup>++</sup></b> | <b>y<sup>*</sup></b> | <b>y<sup>*++</sup></b> | <b>y<sup>0</sup></b> | <b>y<sup>0++</sup></b> |
|----|--------------------|-----------------------|----------------------|------------------------|----------------------|------------------------|------|--------------------|-----------------------|----------------------|------------------------|----------------------|------------------------|
| 1  | 114.091340         | 57.549308             |                      |                        |                      |                        | L    |                    |                       |                      |                        |                      |                        |
| 2  | 227.175404         | 114.091340            |                      |                        |                      |                        | L    | 1634.838427        | 817.922852            | 1617.811878          | 809.409577             | 1616.827862          | 808.9175               |
| 3  | 340.259468         | 170.633372            |                      |                        |                      |                        | I    | <b>1521.754363</b> | 761.380820            | 1504.727814          | 752.867545             | 1503.743798          | 752.3755               |
| 4  | 503.322797         | 252.165036            |                      |                        |                      |                        | Y    | 1408.670299        | 704.838788            | 1391.643750          | 696.325513             | <b>1390.659734</b>   | 695.8335               |
| 5  | <b>618.349740</b>  | 309.678508            |                      |                        | 600.339175           | 300.673226             | D    | <b>1245.606970</b> | 623.307123            | 1228.580421          | 614.793849             | 1227.596405          | 614.3018               |
| 6  | <b>689.386854</b>  | 345.197065            |                      |                        | 671.376289           | 336.191782             | A    | <b>1130.580027</b> | 565.793652            | 1113.553478          | 557.280377             | 1112.569462          | 556.7883               |
| 7  | 776.418882         | 388.713079            |                      |                        | 758.408317           | 379.707796             | S    | <b>1059.542913</b> | 530.275095            | 1042.516364          | 521.761820             | 1041.532348          | 521.2698               |
| 8  | 890.461809         | 445.734542            | 873.435260           | 437.221268             | 872.451244           | 436.729260             | N    | <b>972.510885</b>  | 486.759081            | 955.484336           | 478.245806             | 954.500320           | 477.7537               |
| 9  | <b>1003.545873</b> | 502.276574            | 986.519324           | 493.763300             | 985.535308           | 493.271292             | L    | <b>858.467958</b>  | 429.737617            | 841.441409           | 421.224343             | 840.457393           | 420.7323               |
| 10 | <b>1132.588466</b> | 566.797871            | 1115.561917          | 558.284597             | 1114.577901          | 557.792588             | E    | <b>745.383894</b>  | 373.195585            | 728.357345           | 364.682311             | 727.373329           | 364.1903               |
| 11 | <b>1233.636145</b> | <b>617.321710</b>     | 1216.609596          | 608.808436             | 1215.625580          | 608.316428             | T    | <b>616.341301</b>  | 308.674289            | 599.314752           | 300.161014             | 598.330736           | 299.6690               |
| 12 | <b>1290.657609</b> | 645.832442            | <b>1273.631060</b>   | 637.319168             | <b>1272.647044</b>   | 636.827160             | G    | <b>515.293622</b>  | 258.150449            | 498.267073           | 249.637175             | 497.283057           | 249.1451               |
| 13 | <b>1389.726023</b> | 695.366649            | <b>1372.699474</b>   | 686.853375             | 1371.715458          | 686.361367             | V    | <b>458.272158</b>  | 229.639717            | <b>441.245609</b>    | 221.126443             | 440.261593           | 220.6344               |
| 14 | <b>1486.778787</b> | 743.893032            | <b>1469.752238</b>   | 735.379757             | 1468.768222          | 734.887749             | P    | <b>359.203744</b>  | 180.105510            | <b>342.177195</b>    | 171.592236             | <b>341.193179</b>    | 171.1002               |
| 15 | <b>1573.810815</b> | 787.409046            | 1556.784266          | 778.895771             | 1555.800250          | 778.403763             | S    | 262.150980         | 131.579128            | 245.124431           | 123.065854             | 244.140415           | 122.5738               |
| 16 |                    |                       |                      |                        |                      |                        | R    | 175.118952         | 88.063114             | 158.092403           | 79.549839              |                      |                        |

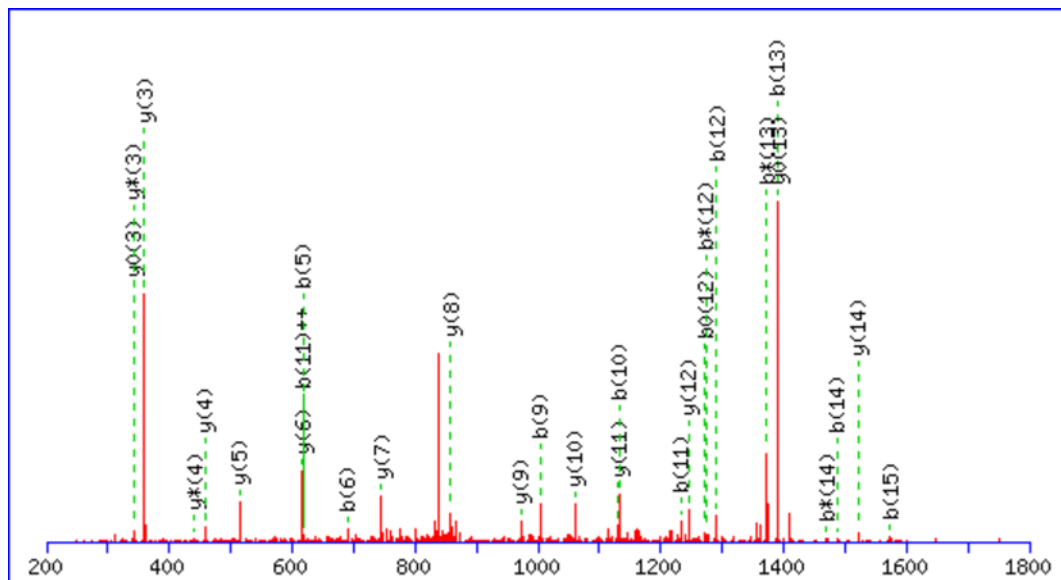

## Peptide View

MS/MS Fragmentation of **DFSLTSSSQTPGATK**

Found in **IPI00291300**, Tax\_Id=9606 Gene\_Symbol=PODXL2 Putative uncharacterized protein PODXL2

**Experiment:** 46 - PyA-1 **Fraction:** PyA-1

Match to Query 10153: 1525.725048 from(763.869800,2+)

Title: OECHL100310\_07.10304.10304.2.dta

Data file \\BOROMIR\Masse\Data LTQ-Orbitrap\Chrystelle Lacroix\Etude clinique sJPU\OECHL100310\_07.raw

**Monoisotopic mass of neutral peptide Mr(calc):** 1525.726028 **Fixed modifications:** Carbamidomethyl (C) (apply to specified residues or termini only) **Ions**

**Score:** 74 **Expect:** 3.9e-006 **Matches :** 25/150 fragment ions using 39 most intense peaks ([help](#))

| # | b                 | b <sup>++</sup> | b* | b <sup>*++</sup> | b <sup>0</sup>    | b <sup>0++</sup> | Seq.     | y                  | y <sup>++</sup>   | y*          | y <sup>*++</sup> | y <sup>0</sup> | y <sup>0++</sup> |
|---|-------------------|-----------------|----|------------------|-------------------|------------------|----------|--------------------|-------------------|-------------|------------------|----------------|------------------|
| 1 | 116.034219        | 58.520748       |    |                  | 98.023654         | 49.515465        | <b>D</b> |                    |                   |             |                  |                |                  |
| 2 | <b>263.102633</b> | 132.054954      |    |                  | 245.092068        | 123.049672       | <b>F</b> | 1411.706351        | 706.356813        | 1394.679802 | 697.843539       | 1393.695786    | 697.3515         |
| 3 | 350.134661        | 175.570968      |    |                  | <b>332.124096</b> | 166.565686       | <b>S</b> | 1264.637937        | <b>632.822607</b> | 1247.611388 | 624.309332       | 1246.627372    | 623.8173         |
| 4 | 463.218725        | 232.113001      |    |                  | 445.208160        | 223.107718       | <b>L</b> | <b>1177.605909</b> | 589.306592        | 1160.579360 | 580.793318       | 1159.595344    | 580.3013         |
| 5 | <b>564.266404</b> | 282.636840      |    |                  | <b>546.255839</b> | 273.631558       | <b>T</b> | <b>1064.521845</b> | 532.764561        | 1047.495296 | 524.251286       | 1046.511280    | 523.7592         |

|    |             |            |             |            |             |            |   |            |            |            |            |            |          |
|----|-------------|------------|-------------|------------|-------------|------------|---|------------|------------|------------|------------|------------|----------|
| 6  | 651.298432  | 326.152854 |             |            | 633.287867  | 317.147572 | S | 963.474166 | 482.240721 | 946.447617 | 473.727446 | 945.463601 | 473.2354 |
| 7  | 738.330460  | 369.668868 |             |            | 720.319895  | 360.663586 | S | 876.442138 | 438.724707 | 859.415589 | 430.211432 | 858.431573 | 429.7194 |
| 8  | 825.362488  | 413.184882 |             |            | 807.351923  | 404.179599 | S | 789.410110 | 395.208693 | 772.383561 | 386.695418 | 771.399545 | 386.2034 |
| 9  | 953.421066  | 477.214171 | 936.394517  | 468.700897 | 935.410501  | 468.208889 | Q | 702.378082 | 351.692679 | 685.351533 | 343.179404 | 684.367517 | 342.6873 |
| 10 | 1054.468745 | 527.738010 | 1037.442196 | 519.224736 | 1036.458180 | 518.732728 | T | 574.319504 | 287.663390 | 557.292955 | 279.150115 | 556.308939 | 278.6581 |
| 11 | 1151.521509 | 576.264392 | 1134.494960 | 567.751118 | 1133.510944 | 567.259110 | P | 473.271825 | 237.139550 | 456.245276 | 228.626276 | 455.261260 | 228.1342 |
| 12 | 1208.542973 | 604.775124 | 1191.516424 | 596.261850 | 1190.532408 | 595.769842 | G | 376.219061 | 188.613168 | 359.192512 | 180.099894 | 358.208496 | 179.6078 |
| 13 | 1279.580087 | 640.293681 | 1262.553538 | 631.780407 | 1261.569522 | 631.288399 | A | 319.197597 | 160.102436 | 302.171048 | 151.589162 | 301.187032 | 151.0971 |
| 14 | 1380.627766 | 690.817521 | 1363.601217 | 682.304246 | 1362.617201 | 681.812238 | T | 248.160483 | 124.583879 | 231.133934 | 116.070605 | 230.149918 | 115.5785 |
| 15 |             |            |             |            |             |            | K | 147.112804 | 74.060040  | 130.086255 | 65.546765  |            |          |

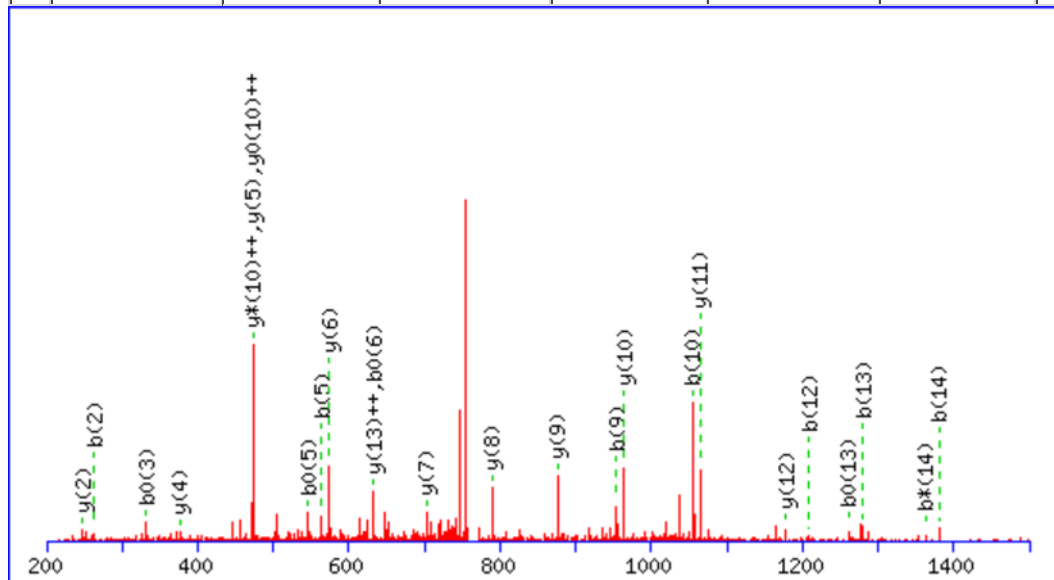

## Peptide View

MS/MS Fragmentation of **GLGTDEESILTLTSR**

Found in **IPI00329801**, Tax\_Id=9606 Gene\_Symbol=ANXA5 Annexin A5

Experiment: 46 - PyA-1 Fraction: PyA-1

Match to Query 12151: 1703.890448 from(852.952500,2+)

Title: OECHL100310\_07.22309.22309.2.dta

Data file \\BOROMIR\Masse\Data LTQ-Orbitrap\Chrystelle Lacroix\Etude clinique sJPU\OECHL100310\_07.raw

**Monoisotopic mass of neutral peptide Mr(calc):** 1703.894135**Fixed modifications:** Carbamidomethyl (C) (apply to specified residues or termini only)**Ions****Score:** 77 **Expect:** 2.2e-006**Matches :** 17/142 fragment ions using 30 most intense peaks ([help](#))

| #  | b                  | b <sup>++</sup> | b <sup>0</sup>     | b <sup>0++</sup> | Seq. | y                  | y <sup>++</sup> | y*          | y* <sup>++</sup> | y <sup>0</sup> | y <sup>0++</sup> | #  |
|----|--------------------|-----------------|--------------------|------------------|------|--------------------|-----------------|-------------|------------------|----------------|------------------|----|
| 1  | 58.028740          | 29.518008       |                    |                  | G    |                    |                 |             |                  |                |                  | 16 |
| 2  | 171.112804         | 86.060040       |                    |                  | L    | 1647.879958        | 824.443617      | 1630.853409 | 815.930343       | 1629.869393    | 815.438335       | 15 |
| 3  | 228.134268         | 114.570772      |                    |                  | G    | <b>1534.795894</b> | 767.901585      | 1517.769345 | 759.388310       | 1516.785329    | 758.896302       | 14 |
| 4  | <b>329.181947</b>  | 165.094611      | 311.171382         | 156.089329       | T    | 1477.774430        | 739.390853      | 1460.747881 | 730.877579       | 1459.763865    | 730.385570       | 13 |
| 5  | 444.208890         | 222.608083      | 426.198325         | 213.602801       | D    | <b>1376.726751</b> | 688.867013      | 1359.700202 | 680.353739       | 1358.716186    | 679.861731       | 12 |
| 6  | 573.251483         | 287.129380      | 555.240918         | 278.124097       | E    | <b>1261.699808</b> | 631.353542      | 1244.673259 | 622.840267       | 1243.689243    | 622.348259       | 11 |
| 7  | 702.294076         | 351.650676      | 684.283511         | 342.645394       | E    | <b>1132.657215</b> | 566.832246      | 1115.630666 | 558.318971       | 1114.646650    | 557.826963       | 10 |
| 8  | 789.326104         | 395.166690      | 771.315539         | 386.161408       | S    | <b>1003.614622</b> | 502.310949      | 986.588073  | 493.797674       | 985.604057     | 493.305666       | 9  |
| 9  | 902.410168         | 451.708722      | 884.399603         | 442.703440       | I    | 916.582594         | 458.794935      | 899.556045  | 450.281660       | 898.572029     | 449.789652       | 8  |
| 10 | 1015.494232        | 508.250754      | 997.483667         | 499.245472       | L    | <b>803.498530</b>  | 402.252903      | 786.471981  | 393.739628       | 785.487965     | 393.247620       | 7  |
| 11 | 1116.541911        | 558.774594      | 1098.531346        | 549.769311       | T    | <b>690.414466</b>  | 345.710871      | 673.387917  | 337.197596       | 672.403901     | 336.705588       | 6  |
| 12 | <b>1229.625975</b> | 615.316625      | <b>1211.615410</b> | 606.311343       | L    | <b>589.366787</b>  | 295.187031      | 572.340238  | 286.673757       | 571.356222     | 286.181749       | 5  |
| 13 | <b>1342.710039</b> | 671.858657      | <b>1324.699474</b> | 662.853375       | L    | <b>476.282723</b>  | 238.644999      | 459.256174  | 230.131725       | 458.272158     | 229.639717       | 4  |
| 14 | <b>1443.757718</b> | 722.382497      | 1425.747153        | 713.377214       | T    | <b>363.198659</b>  | 182.102968      | 346.172110  | 173.589693       | 345.188094     | 173.097685       | 3  |
| 15 | 1530.789746        | 765.898511      | 1512.779181        | 756.893228       | S    | <b>262.150980</b>  | 131.579128      | 245.124431  | 123.065854       | 244.140415     | 122.573846       | 2  |
| 16 |                    |                 |                    |                  | R    | 175.118952         | 88.063114       | 158.092403  | 79.549839        |                |                  | 1  |

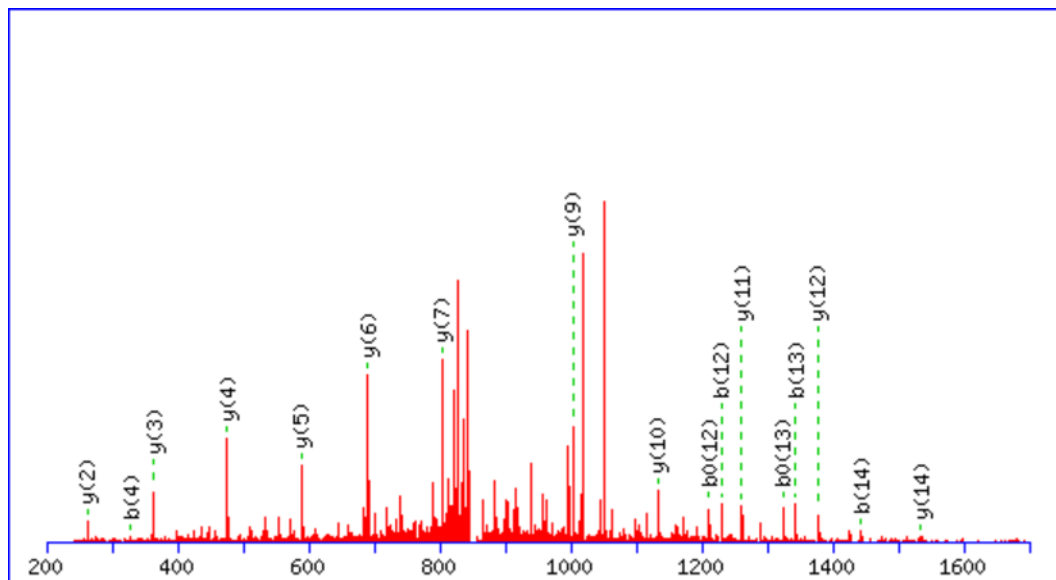

## Peptide View

MS/MS Fragmentation of **HSFKGEECPAGSHR**

Found in **IPI00021970**, Tax\_Id=9606 Gene\_Symbol=MGC31957;TNFRSF10C TNFRSF10C protein

**Experiment:** 46 - PyA-1 **Fraction:** PyA-1

Match to Query 10898: 1597.706848 from(799.860700,2+)

Title: OECHL100310\_07.2099.2099.2.dta

Data file \\BOROMIR\Masse\Data LTQ-Orbitrap\Chrystelle Lacroix\Etude clinique sJPU\OECHL100310\_07.raw

**Monoisotopic mass of neutral peptide Mr(calc):** 1597.705566 **Fixed modifications:** Carbamidomethyl (C) (apply to specified residues or termini only) **Ions**

**Score:** 62 **Expect:** 3.9e-005 **Matches :** 37/144 fragment ions using 70 most intense peaks ([help](#))

| # | b                 | b <sup>++</sup> | b*         | b <sup>*++</sup> | b <sup>0</sup>    | b <sup>0++</sup> | Seq. | y                  | y <sup>++</sup>   | y*          | y <sup>*++</sup>  | y <sup>0</sup>     | y <sup>0++</sup> |
|---|-------------------|-----------------|------------|------------------|-------------------|------------------|------|--------------------|-------------------|-------------|-------------------|--------------------|------------------|
| 1 | 138.066188        | 69.536732       |            |                  |                   |                  | H    |                    |                   |             |                   |                    |                  |
| 2 | <b>225.098216</b> | 113.052746      |            |                  | 207.087651        | 104.047463       | S    | <b>1461.653938</b> | <b>731.330607</b> | 1444.627389 | <b>722.817333</b> | <b>1443.643373</b> | <b>722.3253</b>  |
| 3 | <b>372.166630</b> | 186.586953      |            |                  | <b>354.156065</b> | 177.581671       | F    | <b>1374.621910</b> | <b>687.814593</b> | 1357.595361 | 679.301319        | 1356.611345        | 678.8093         |
| 4 | <b>500.261593</b> | 250.634435      | 483.235044 | 242.121160       | <b>482.251028</b> | 241.629152       | K    | <b>1227.553496</b> | <b>614.280386</b> | 1210.526947 | <b>605.767112</b> | 1209.542931        | 605.2751         |
| 5 | 557.283057        | 279.145167      | 540.256508 | 270.631892       | <b>539.272492</b> | 270.139884       | G    | <b>1099.458533</b> | 550.232905        | 1082.431984 | 541.719630        | 1081.447968        | 541.2276         |

|    |                    |            |                    |                   |             |                   |   |                    |                   |                   |            |                   |          |
|----|--------------------|------------|--------------------|-------------------|-------------|-------------------|---|--------------------|-------------------|-------------------|------------|-------------------|----------|
| 6  | <b>686.325650</b>  | 343.666463 | 669.299101         | 335.153189        | 668.315085  | 334.661181        | E | <b>1042.437069</b> | 521.722173        | 1025.410520       | 513.208898 | 1024.426504       | 512.7168 |
| 7  | 815.368243         | 408.187760 | 798.341694         | <b>399.674485</b> | 797.357678  | <b>399.182477</b> | E | <b>913.394476</b>  | 457.200876        | 896.367927        | 448.687602 | <b>895.383911</b> | 448.1955 |
| 8  | <b>975.398892</b>  | 488.203084 | 958.372343         | 479.689810        | 957.388327  | 479.197802        | C | <b>784.351883</b>  | 392.679580        | 767.325334        | 384.166305 | 766.341318        | 383.6742 |
| 9  | 1072.451656        | 536.729466 | 1055.425107        | 528.216192        | 1054.441091 | 527.724184        | P | <b>624.321234</b>  | <b>312.664255</b> | <b>607.294685</b> | 304.150981 | <b>606.310669</b> | 303.6589 |
| 10 | <b>1143.488770</b> | 572.248023 | 1126.462221        | 563.734749        | 1125.478205 | 563.242741        | A | 527.268470         | 264.137873        | 510.241921        | 255.624598 | 509.257905        | 255.1325 |
| 11 | <b>1200.510234</b> | 600.758755 | 1183.483685        | 592.245481        | 1182.499669 | 591.753473        | G | <b>456.231356</b>  | 228.619316        | 439.204807        | 220.106041 | 438.220791        | 219.6140 |
| 12 | <b>1287.542262</b> | 644.274769 | 1270.515713        | 635.761495        | 1269.531697 | 635.269487        | S | <b>399.209892</b>  | 200.108584        | 382.183343        | 191.595309 | 381.199327        | 191.1033 |
| 13 | <b>1424.601174</b> | 712.804225 | <b>1407.574625</b> | 704.290951        | 1406.590609 | 703.798943        | H | <b>312.177864</b>  | 156.592570        | 295.151315        | 148.079295 |                   |          |
| 14 |                    |            |                    |                   |             |                   | R | 175.118952         | 88.063114         | 158.092403        | 79.549839  |                   |          |

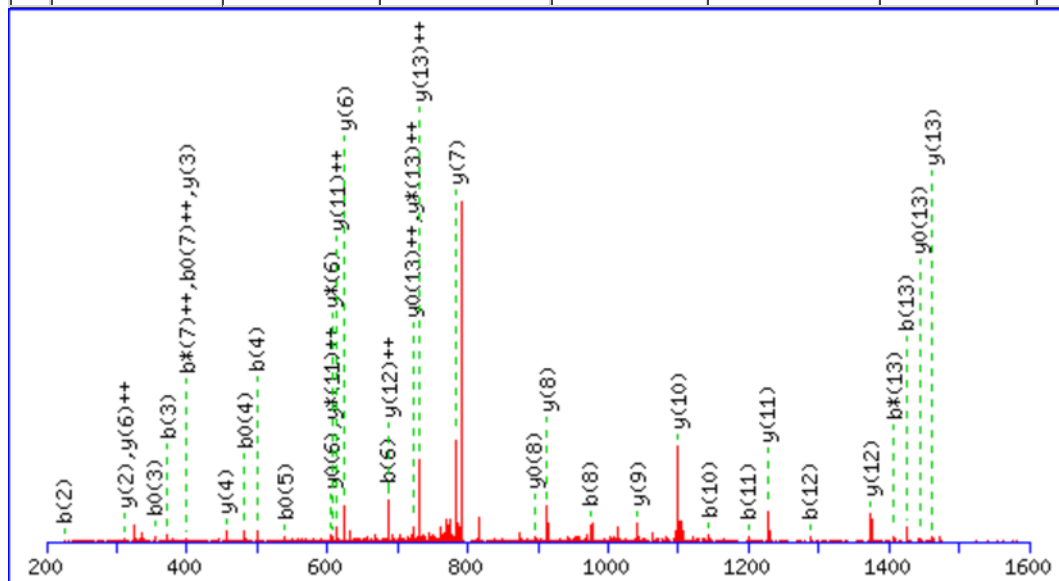

## Peptide View

MS/MS Fragmentation of **AVGLLTVISK**

Found in **IPI00013446**, Tax\_Id=9606 Gene\_Symbol=PSCA Prostate stem cell antigen

Experiment: 46 - PyA-1 Fraction: PyA-1

Match to Query 3266: 999.633848 from(500.824200,2+)

Title: OECHL100310\_07.16737.16737.2.dta

Data file \\BOROMIR\Masse\Data LTQ-Orbitrap\Chrystelle Lacroix\Etude clinique sJPU\OECHL100310\_07.raw

**Monoisotopic mass of neutral peptide Mr(calc):** 999.632828**Fixed modifications:** Carbamidomethyl (C) (apply to specified residues or termini only)**Ions Score:**61 **Expect:** 9.3e-006**Matches :** 14/78 fragment ions using 26 most intense peaks ([help](#))

| #  | b                 | b <sup>++</sup>   | b <sup>0</sup> | b <sup>0++</sup> | Seq. | y                 | y <sup>++</sup> | y <sup>*</sup> | y <sup>*++</sup> | y <sup>0</sup> | y <sup>0++</sup> | #  |
|----|-------------------|-------------------|----------------|------------------|------|-------------------|-----------------|----------------|------------------|----------------|------------------|----|
| 1  | 72.044390         | 36.525833         |                |                  | A    |                   |                 |                |                  |                |                  | 10 |
| 2  | <b>171.112804</b> | 86.060040         |                |                  | V    | 929.602995        | 465.305136      | 912.576446     | 456.791861       | 911.592430     | 456.299853       | 9  |
| 3  | <b>228.134268</b> | 114.570772        |                |                  | G    | <b>830.534581</b> | 415.770929      | 813.508032     | 407.257654       | 812.524016     | 406.765646       | 8  |
| 4  | <b>341.218332</b> | <b>171.112804</b> |                |                  | L    | 773.513117        | 387.260197      | 756.486568     | 378.746922       | 755.502552     | 378.254914       | 7  |
| 5  | <b>454.302396</b> | 227.654836        |                |                  | L    | <b>660.429053</b> | 330.718165      | 643.402504     | 322.204890       | 642.418488     | 321.712882       | 6  |
| 6  | <b>555.350075</b> | 278.178676        | 537.339510     | 269.173393       | T    | <b>547.344989</b> | 274.176133      | 530.318440     | 265.662858       | 529.334424     | 265.170850       | 5  |
| 7  | <b>654.418489</b> | 327.712883        | 636.407924     | 318.707600       | V    | 446.297310        | 223.652293      | 429.270761     | 215.139018       | 428.286745     | 214.647010       | 4  |
| 8  | <b>767.502553</b> | 384.254915        | 749.491988     | 375.249632       | I    | <b>347.228896</b> | 174.118086      | 330.202347     | 165.604811       | 329.218331     | 165.112803       | 3  |
| 9  | <b>854.534581</b> | 427.770929        | 836.524016     | 418.765646       | S    | <b>234.144832</b> | 117.576054      | 217.118283     | 109.062779       | 216.134267     | 108.570771       | 2  |
| 10 |                   |                   |                |                  | K    | 147.112804        | 74.060040       | 130.086255     | 65.546765        |                |                  | 1  |

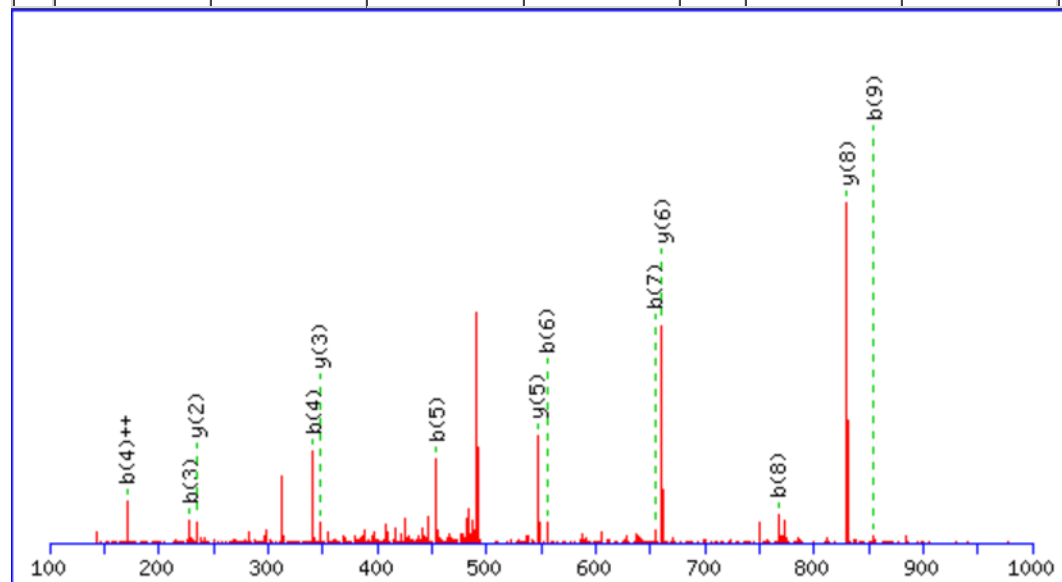



## Peptide View

MS/MS Fragmentation of **LYQQHGAGLFDVTR**

Found in **IPI00554538**, Tax\_Id=9606 Gene\_Symbol=TPP1 Putative uncharacterized protein TPP1

**Experiment:** 46 - PyA-1 **Fraction:** PyA-1

Match to Query 10995: 1603.812448 from(802.913500,2+)

Title: OECHL100310\_07.13251.13251.2.dta

Data file \\BOROMIR\Masse\Data LTQ-Orbitrap\Chrystelle Lacroix\Etude clinique sJPU\OECHL100310\_07.raw

**Monoisotopic mass of neutral peptide Mr(calc):** 1603.810699**Fixed modifications:** Carbamidomethyl (C) (apply to specified residues or termini only)**Ions**

**Score:** 49 **Expect:** 0.0015**Matches :** 25/130 fragment ions using 42 most intense peaks ([help](#))

| #  | b                  | b <sup>++</sup> | b*          | b <sup>*++</sup>  | b <sup>0</sup> | b <sup>0++</sup>  | Seq. | y                  | y <sup>++</sup>   | y*                 | y <sup>*++</sup>  | y <sup>0</sup> | y <sup>0++</sup> |
|----|--------------------|-----------------|-------------|-------------------|----------------|-------------------|------|--------------------|-------------------|--------------------|-------------------|----------------|------------------|
| 1  | 114.091340         | 57.549308       |             |                   |                |                   | L    |                    |                   |                    |                   |                |                  |
| 2  | <b>277.154669</b>  | 139.080973      |             |                   |                |                   | Y    | 1491.733905        | 746.370591        | 1474.707356        | 737.857316        | 1473.723340    | 737.3653         |
| 3  | <b>405.213247</b>  | 203.110262      | 388.186698  | 194.596987        |                |                   | Q    | <b>1328.670576</b> | 664.838926        | 1311.644027        | <b>656.325652</b> | 1310.660011    | <b>655.8336</b>  |
| 4  | 533.271825         | 267.139551      | 516.245276  | 258.626276        |                |                   | Q    | <b>1200.611998</b> | 600.809637        | <b>1183.585449</b> | <b>592.296363</b> | 1182.601433    | <b>591.8043</b>  |
| 5  | <b>670.330737</b>  | 335.669007      | 653.304188  | 327.155732        |                |                   | H    | <b>1072.553420</b> | <b>536.780348</b> | 1055.526871        | 528.267074        | 1054.542855    | 527.7750         |
| 6  | 727.352201         | 364.179739      | 710.325652  | 355.666464        |                |                   | G    | <b>935.494508</b>  | 468.250892        | 918.467959         | 459.737618        | 917.483943     | 459.2456         |
| 7  | 798.389315         | 399.698296      | 781.362766  | 391.185021        |                |                   | A    | <b>878.473044</b>  | 439.740160        | 861.446495         | 431.226886        | 860.462479     | 430.7348         |
| 8  | 855.410779         | 428.209028      | 838.384230  | 419.695753        |                |                   | G    | 807.435930         | 404.221603        | 790.409381         | 395.708329        | 789.425365     | 395.2163         |
| 9  | <b>968.494843</b>  | 484.751060      | 951.468294  | 476.237785        |                |                   | L    | 750.414466         | <b>375.710871</b> | 733.387917         | 367.197597        | 732.403901     | 366.7055         |
| 10 | <b>1115.563257</b> | 558.285267      | 1098.536708 | 549.771992        |                |                   | F    | 637.330402         | 319.168839        | 620.303853         | 310.655565        | 619.319837     | 310.1635         |
| 11 | <b>1230.590200</b> | 615.798738      | 1213.563651 | 607.285464        | 1212.579635    | 606.793456        | D    | <b>490.261988</b>  | 245.634632        | 473.235439         | 237.121358        | 472.251423     | 236.6293         |
| 12 | <b>1329.658614</b> | 665.332945      | 1312.632065 | <b>656.819671</b> | 1311.648049    | <b>656.327663</b> | V    | <b>375.235045</b>  | 188.121161        | 358.208496         | 179.607886        | 357.224480     | 179.1158         |
| 13 | <b>1430.706293</b> | 715.856785      | 1413.679744 | 707.343510        | 1412.695728    | 706.851502        | T    | <b>276.166631</b>  | 138.586953        | 259.140082         | 130.073679        | 258.156066     | 129.5816         |
| 14 |                    |                 |             |                   |                |                   | R    | 175.118952         | 88.063114         | 158.092403         | 79.549839         |                |                  |

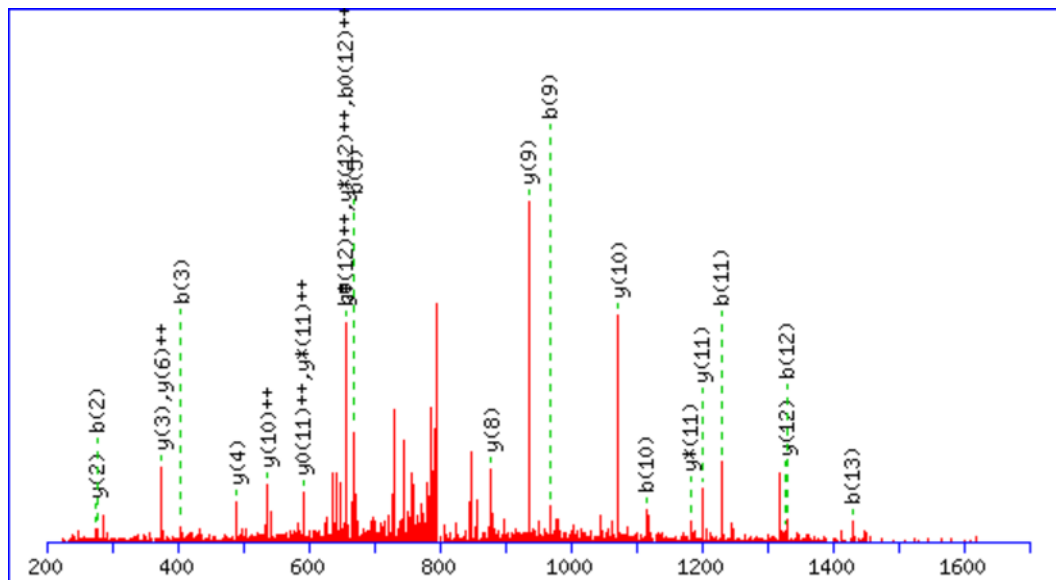

## Peptide View

MS/MS Fragmentation of **YDIALVQEV**R

Found in **IPI00031065**, Tax\_Id=9606 Gene\_Symbol=DNASE1 Deoxyribonuclease-1

**Experiment:** 46 - PyA-1 **Fraction:** PyA-1

Match to Query 6090: 1204.646248 from(603.330400,2+)

Title: OECHL100310\_07.15169.15169.2.dta

Data file \\BOROMIR\Masse\Data LTQ-Orbitrap\Chrystelle Lacroix\Etude clinique sJPU\OECHL100310\_07.raw

**Monoisotopic mass of neutral peptide Mr(calc):** 1204.645172 **Fixed modifications:** Carbamidomethyl (C) (apply to specified residues or termini only) **Ions**

**Score:** 62 **Expect:** 4.3e-005 **Matches :** 14/90 fragment ions using 21 most intense peaks ([help](#))

| # | b                 | b <sup>++</sup> | b* | b <sup>*++</sup> | b <sup>0</sup> | b <sup>0++</sup> | Seq. | y                 | y <sup>++</sup>   | y*          | y <sup>*++</sup> | y <sup>0</sup> | y <sup>0++</sup> |
|---|-------------------|-----------------|----|------------------|----------------|------------------|------|-------------------|-------------------|-------------|------------------|----------------|------------------|
| 1 | 164.070605        | 82.538940       |    |                  |                |                  | Y    |                   |                   |             |                  |                |                  |
| 2 | <b>279.097548</b> | 140.052412      |    |                  | 261.086983     | 131.047130       | D    | 1042.589136       | 521.798206        | 1025.562587 | 513.284932       | 1024.578571    | 512.7929         |
| 3 | 392.181612        | 196.594444      |    |                  | 374.171047     | 187.589162       | I    | <b>927.562193</b> | <b>464.284735</b> | 910.535644  | 455.771460       | 909.551628     | 455.2794         |
| 4 | 463.218726        | 232.113001      |    |                  | 445.208161     | 223.107719       | A    | <b>814.478129</b> | 407.742703        | 797.451580  | 399.229428       | 796.467564     | 398.7374         |
| 5 | <b>576.302790</b> | 288.655033      |    |                  | 558.292225     | 279.649751       | L    | <b>743.441015</b> | 372.224146        | 726.414466  | 363.710871       | 725.430450     | 363.2188         |

|    |                    |            |             |            |             |            |   |                   |            |            |            |            |          |
|----|--------------------|------------|-------------|------------|-------------|------------|---|-------------------|------------|------------|------------|------------|----------|
| 6  | <b>675.371204</b>  | 338.189240 |             |            | 657.360639  | 329.183958 | V | <b>630.356951</b> | 315.682114 | 613.330402 | 307.168839 | 612.346386 | 306.6768 |
| 7  | 803.429782         | 402.218529 | 786.403233  | 393.705255 | 785.419217  | 393.213247 | Q | <b>531.288537</b> | 266.147907 | 514.261988 | 257.634632 | 513.277972 | 257.1426 |
| 8  | <b>932.472375</b>  | 466.739826 | 915.445826  | 458.226551 | 914.461810  | 457.734543 | E | <b>403.229959</b> | 202.118618 | 386.203410 | 193.605343 | 385.219394 | 193.1133 |
| 9  | <b>1031.540789</b> | 516.274033 | 1014.514240 | 507.760758 | 1013.530224 | 507.268750 | V | <b>274.187366</b> | 137.597321 | 257.160817 | 129.084047 |            |          |
| 10 |                    |            |             |            |             |            | R | <b>175.118952</b> | 88.063114  | 158.092403 | 79.549839  |            |          |

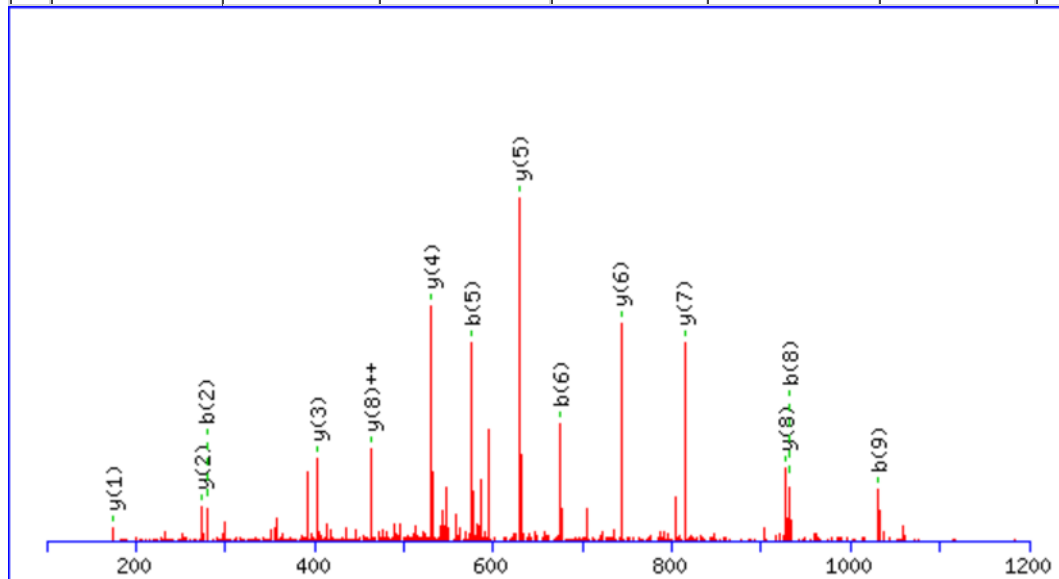

## Peptide View

MS/MS Fragmentation of **AVFVDLEPTVIDEVR**

Found in **IPI00166768**, Tax\_Id=9606 Gene\_Symbol=TUBA1C TUBA1C protein

**Experiment:** 46 - PyA-1 **Fraction:** PyA-1

Match to Query 12134: 1700.900848 from(851.457700,2+)

Title: OECHL100310\_07.19268.19268.2.dta

Data file \\BOROMIR\Masse\Data LTQ-Orbitrap\Chrystelle Lacroix\Etude clinique sJPU\OECHL100310\_07.raw

**Monoisotopic mass of neutral peptide Mr(calc):** 1700.898514 **Fixed modifications:** Carbamidomethyl (C) (apply to specified residues or termini only) **Ions**

**Score:** 66 **Expect:** 3e-005 **Matches :** 12/128 fragment ions using 15 most intense peaks ([help](#))

| # | b | b <sup>++</sup> | b <sup>0</sup> | b <sup>0++</sup> | Seq. | y | y <sup>++</sup> | y <sup>*</sup> | y <sup>*++</sup> | y <sup>0</sup> | y <sup>0++</sup> | # |
|---|---|-----------------|----------------|------------------|------|---|-----------------|----------------|------------------|----------------|------------------|---|
|---|---|-----------------|----------------|------------------|------|---|-----------------|----------------|------------------|----------------|------------------|---|

|    |                    |            |             |            |   |                    |            |             |            |             |            |    |
|----|--------------------|------------|-------------|------------|---|--------------------|------------|-------------|------------|-------------|------------|----|
| 1  | 72.044390          | 36.525833  |             |            | A |                    |            |             |            |             |            | 15 |
| 2  | 171.112804         | 86.060040  |             |            | V | 1630.868665        | 815.937971 | 1613.842116 | 807.424696 | 1612.858100 | 806.932688 | 14 |
| 3  | <b>318.181218</b>  | 159.594247 |             |            | F | 1531.800251        | 766.403764 | 1514.773702 | 757.890489 | 1513.789686 | 757.398481 | 13 |
| 4  | 417.249632         | 209.128454 |             |            | V | <b>1384.731837</b> | 692.869557 | 1367.705288 | 684.356282 | 1366.721272 | 683.864274 | 12 |
| 5  | 532.276575         | 266.641926 | 514.266010  | 257.636643 | D | <b>1285.663423</b> | 643.335350 | 1268.636874 | 634.822075 | 1267.652858 | 634.330067 | 11 |
| 6  | <b>645.360639</b>  | 323.183958 | 627.350074  | 314.178675 | L | <b>1170.636480</b> | 585.821878 | 1153.609931 | 577.308604 | 1152.625915 | 576.816596 | 10 |
| 7  | <b>774.403232</b>  | 387.705254 | 756.392667  | 378.699972 | E | <b>1057.552416</b> | 529.279846 | 1040.525867 | 520.766572 | 1039.541851 | 520.274564 | 9  |
| 8  | 871.455996         | 436.231636 | 853.445431  | 427.226354 | P | <b>928.509823</b>  | 464.758550 | 911.483274  | 456.245275 | 910.499258  | 455.753267 | 8  |
| 9  | 972.503675         | 486.755476 | 954.493110  | 477.750193 | T | 831.457059         | 416.232168 | 814.430510  | 407.718893 | 813.446494  | 407.226885 | 7  |
| 10 | 1071.572089        | 536.289683 | 1053.561524 | 527.284400 | V | 730.409380         | 365.708328 | 713.382831  | 357.195054 | 712.398815  | 356.703046 | 6  |
| 11 | 1184.656153        | 592.831715 | 1166.645588 | 583.826432 | I | <b>631.340966</b>  | 316.174121 | 614.314417  | 307.660846 | 613.330401  | 307.168838 | 5  |
| 12 | 1299.683096        | 650.345186 | 1281.672531 | 641.339904 | D | <b>518.256902</b>  | 259.632089 | 501.230353  | 251.118815 | 500.246337  | 250.626807 | 4  |
| 13 | 1428.725689        | 714.866483 | 1410.715124 | 705.861200 | E | <b>403.229959</b>  | 202.118617 | 386.203410  | 193.605343 | 385.219394  | 193.113335 | 3  |
| 14 | <b>1527.794103</b> | 764.400690 | 1509.783538 | 755.395407 | V | 274.187366         | 137.597321 | 257.160817  | 129.084047 |             |            | 2  |
| 15 |                    |            |             |            | R | 175.118952         | 88.063114  | 158.092403  | 79.549839  |             |            | 1  |

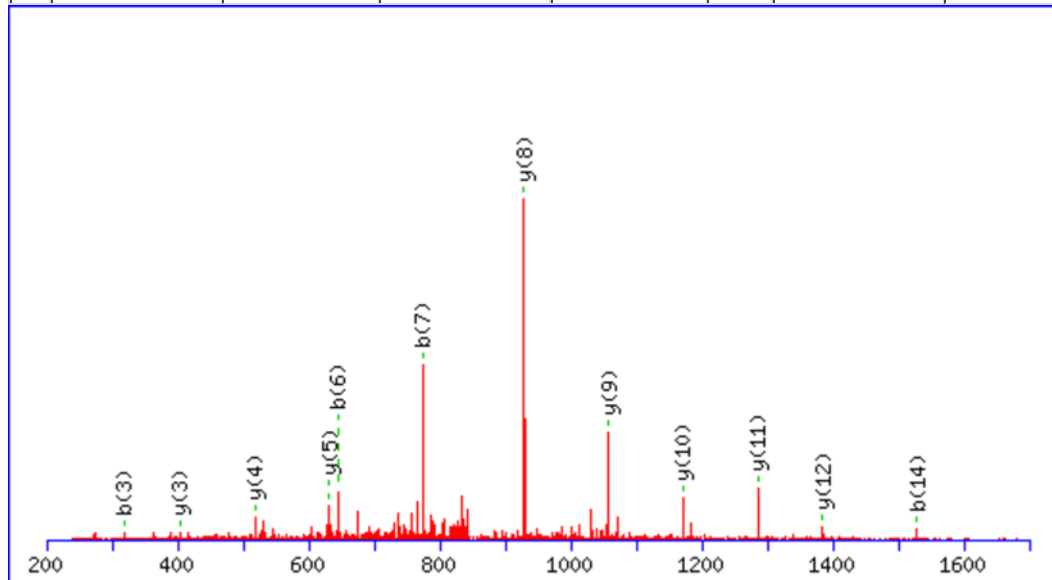

## Peptide View

MS/MS Fragmentation of **YSGSEGSTQTLTKGELK**

Found in **IPI00017526**, Tax\_Id=9606 Gene\_Symbol=S100P Protein S100-P

Experiment: 46 - PyA-1 Fraction: PyA-1

Match to Query 12953: 1784.880448 from(893.447500,2+)

Title: OECHL100310\_07.7289.7289.2.dta

Data file \\BOROMIR\Masse\Data LTQ-Orbitrap\Chrystelle Lacroix\Etude clinique sJPU\OECHL100310\_07.raw

**Monoisotopic mass of neutral peptide Mr(calc):** 1784.879211 **Fixed modifications:** Carbamidomethyl (C) (apply to specified residues or termini only) **Ions**

**Score:** 72 **Expect:** 9.3e-006 **Matches :** 27/170 fragment ions using 45 most intense peaks ([help](#))

| #  | b                  | b <sup>++</sup> | b*                 | b <sup>*++</sup>  | b <sup>0</sup>     | b <sup>0++</sup> | Seq. | y                  | y <sup>++</sup>   | y*                 | y <sup>*++</sup> | y <sup>0</sup>    | y <sup>0++</sup> |
|----|--------------------|-----------------|--------------------|-------------------|--------------------|------------------|------|--------------------|-------------------|--------------------|------------------|-------------------|------------------|
| 1  | 164.070605         | 82.538940       |                    |                   |                    |                  | Y    |                    |                   |                    |                  |                   |                  |
| 2  | 251.102633         | 126.054954      |                    |                   | 233.092068         | 117.049672       | S    | <b>1622.823172</b> | <b>811.915224</b> | 1605.796623        | 803.401950       | 1604.812607       | 802.9099         |
| 3  | 308.124097         | 154.565687      |                    |                   | 290.113532         | 145.560404       | G    | 1535.791144        | <b>768.399210</b> | 1518.764595        | 759.885936       | 1517.780579       | 759.3939         |
| 4  | 395.156125         | 198.081701      |                    |                   | 377.145560         | 189.076418       | S    | 1478.769680        | <b>739.888478</b> | 1461.743131        | 731.375204       | 1460.759115       | 730.8831         |
| 5  | 524.198718         | 262.602997      |                    |                   | <b>506.188153</b>  | 253.597715       | E    | <b>1391.737652</b> | <b>696.372464</b> | 1374.711103        | 687.859190       | 1373.727087       | 687.3671         |
| 6  | 581.220182         | 291.113729      |                    |                   | 563.209617         | 282.108447       | G    | <b>1262.695059</b> | <b>631.851167</b> | 1245.668510        | 623.337893       | 1244.684494       | 622.8458         |
| 7  | 668.252210         | 334.629743      |                    |                   | 650.241645         | 325.624461       | S    | <b>1205.673595</b> | 603.340436        | 1188.647046        | 594.827161       | 1187.663030       | 594.3351         |
| 8  | 769.299889         | 385.153583      |                    |                   | 751.289324         | 376.148300       | T    | <b>1118.641567</b> | 559.824421        | 1101.615018        | 551.311147       | 1100.631002       | 550.8191         |
| 9  | 897.358467         | 449.182872      | 880.331918         | 440.669597        | 879.347902         | 440.177589       | Q    | <b>1017.593888</b> | 509.300582        | <b>1000.567339</b> | 500.787307       | 999.583323        | 500.2952         |
| 10 | 998.406146         | 499.706711      | 981.379597         | 491.193437        | 980.395581         | 490.701429       | T    | 889.535310         | 445.271293        | 872.508761         | 436.758018       | 871.524745        | 436.2660         |
| 11 | 1111.490210        | 556.248743      | 1094.463661        | 547.735469        | 1093.479645        | 547.243461       | L    | <b>788.487631</b>  | 394.747453        | 771.461082         | 386.234179       | 770.477066        | 385.7421         |
| 12 | 1212.537889        | 606.772583      | 1195.511340        | 598.259308        | <b>1194.527324</b> | 597.767300       | T    | <b>675.403567</b>  | 338.205421        | 658.377018         | 329.692147       | 657.393002        | 329.2001         |
| 13 | <b>1340.632852</b> | 670.820064      | 1323.606303        | 662.306790        | 1322.622287        | 661.814782       | K    | <b>574.355888</b>  | 287.681582        | 557.329339         | 279.168307       | 556.345323        | 278.6762         |
| 14 | <b>1397.654316</b> | 699.330796      | 1380.627767        | 690.817522        | 1379.643751        | 690.325514       | G    | <b>446.260925</b>  | 223.634100        | 429.234376         | 215.120826       | 428.250360        | 214.6288         |
| 15 | <b>1526.696909</b> | 763.852093      | <b>1509.670360</b> | 755.338818        | 1508.686344        | 754.846810       | E    | 389.239461         | 195.123368        | 372.212912         | 186.610094       | <b>371.228896</b> | 186.1180         |
| 16 | <b>1639.780973</b> | 820.394124      | <b>1622.754424</b> | <b>811.880850</b> | 1621.770408        | 811.388842       | L    | <b>260.196868</b>  | 130.602072        | 243.170319         | 122.088797       |                   |                  |
| 17 |                    |                 |                    |                   |                    |                  | K    | 147.112804         | 74.060040         | 130.086255         | 65.546765        |                   |                  |

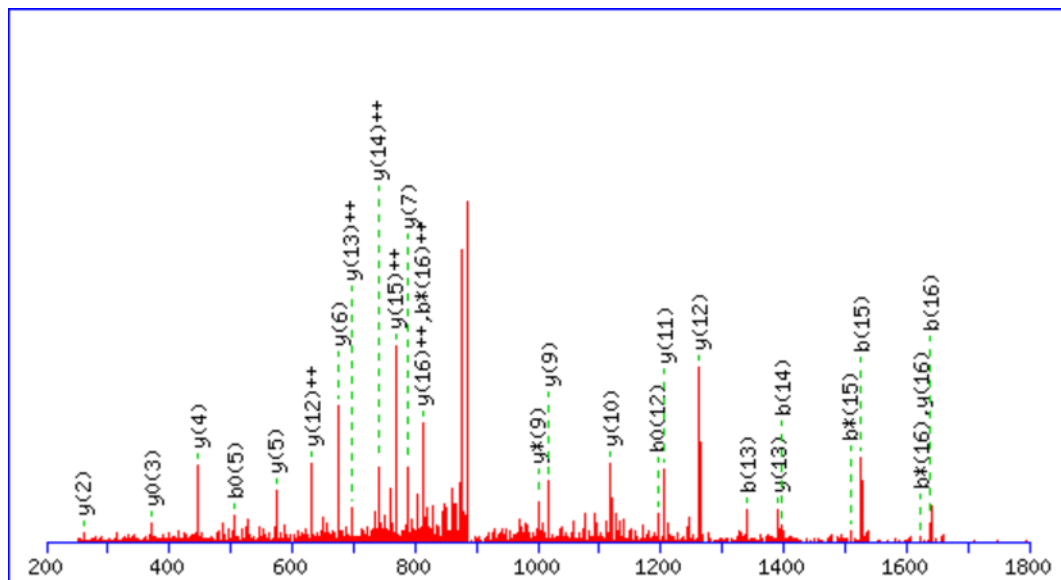

## Peptide View

MS/MS Fragmentation of **GQLPISVTCIADEIGAR**

Found in **IPI00240345**, Tax\_Id=9606 Gene\_Symbol=CLEC14A C-type lectin domain family 14 member A

**Experiment:** 46 - PyA-1 **Fraction:** PyA-1

Match to Query 13072: 1798.924848 from(900.469700,2+)

Title: OECHL100310\_07.19904.19904.2.dta

Data file \\BOROMIR\Masse\Data LTQ-Orbitrap\Chrystelle Lacroix\Etude clinique sJPU\OECHL100310\_07.raw

**Monoisotopic mass of neutral peptide Mr(calc):** 1798.924728 **Fixed modifications:** Carbamidomethyl (C) (apply to specified residues or termini only) **Ions**

**Score:** 70 **Expect:** 1.3e-005 **Matches :** 19/172 fragment ions using 31 most intense peaks ([help](#))

| # | b                 | b <sup>++</sup> | b <sup>*</sup> | b <sup>*++</sup> | b <sup>0</sup> | b <sup>0++</sup> | Seq.     | y                  | y <sup>++</sup>   | y <sup>*</sup> | y <sup>*++</sup> | y <sup>0</sup> | y <sup>0++</sup> |
|---|-------------------|-----------------|----------------|------------------|----------------|------------------|----------|--------------------|-------------------|----------------|------------------|----------------|------------------|
| 1 | 58.028740         | 29.518008       |                |                  |                |                  | <b>G</b> |                    |                   |                |                  |                |                  |
| 2 | 186.087318        | 93.547297       | 169.060769     | 85.034023        |                |                  | <b>Q</b> | 1742.910548        | 871.958912        | 1725.883999    | 863.445638       | 1724.899983    | 862.9536         |
| 3 | <b>299.171382</b> | 150.089329      | 282.144833     | 141.576055       |                |                  | <b>L</b> | 1614.851970        | <b>807.929623</b> | 1597.825421    | 799.416349       | 1596.841405    | 798.9243         |
| 4 | 396.224146        | 198.615711      | 379.197597     | 190.102436       |                |                  | <b>P</b> | <b>1501.767906</b> | <b>751.387591</b> | 1484.741357    | 742.874317       | 1483.757341    | 742.3823         |
| 5 | <b>509.308210</b> | 255.157743      | 492.281661     | 246.644468       |                |                  | <b>I</b> | 1404.715142        | 702.861209        | 1387.688593    | 694.347935       | 1386.704577    | 693.8559         |

|    |                    |            |             |            |                    |            |   |                    |            |             |                   |             |          |
|----|--------------------|------------|-------------|------------|--------------------|------------|---|--------------------|------------|-------------|-------------------|-------------|----------|
| 6  | <b>596.340238</b>  | 298.673757 | 579.313689  | 290.160483 | 578.329673         | 289.668475 | S | <b>1291.631078</b> | 646.319177 | 1274.604529 | 637.805903        | 1273.620513 | 637.3138 |
| 7  | 695.408652         | 348.207964 | 678.382103  | 339.694689 | 677.398087         | 339.202681 | V | <b>1204.599050</b> | 602.803163 | 1187.572501 | 594.289889        | 1186.588485 | 593.7978 |
| 8  | 796.456331         | 398.731804 | 779.429782  | 390.218529 | 778.445766         | 389.726521 | T | <b>1105.530636</b> | 553.268956 | 1088.504087 | <b>544.755682</b> | 1087.520071 | 544.2636 |
| 9  | 956.486980         | 478.747128 | 939.460431  | 470.233854 | 938.476415         | 469.741846 | C | <b>1004.482957</b> | 502.745117 | 987.456408  | 494.231842        | 986.472392  | 493.7398 |
| 10 | 1069.571044        | 535.289160 | 1052.544495 | 526.775886 | 1051.560479        | 526.283878 | I | <b>844.452308</b>  | 422.729792 | 827.425759  | 414.216518        | 826.441743  | 413.7245 |
| 11 | 1140.608158        | 570.807717 | 1123.581609 | 562.294443 | 1122.597593        | 561.802435 | A | <b>731.368244</b>  | 366.187760 | 714.341695  | 357.674486        | 713.357679  | 357.1824 |
| 12 | 1255.635101        | 628.321189 | 1238.608552 | 619.807914 | 1237.624536        | 619.315906 | D | 660.331130         | 330.669203 | 643.304581  | 322.155929        | 642.320565  | 321.6639 |
| 13 | <b>1384.677694</b> | 692.842485 | 1367.651145 | 684.329211 | <b>1366.667129</b> | 683.837203 | E | <b>545.304187</b>  | 273.155732 | 528.277638  | 264.642457        | 527.293622  | 264.1504 |
| 14 | 1497.761758        | 749.384517 | 1480.735209 | 740.871243 | 1479.751193        | 740.379235 | I | <b>416.261594</b>  | 208.634435 | 399.235045  | 200.121160        |             |          |
| 15 | 1554.783222        | 777.895249 | 1537.756673 | 769.381975 | 1536.772657        | 768.889967 | G | <b>303.177530</b>  | 152.092403 | 286.150981  | 143.579128        |             |          |
| 16 | <b>1625.820336</b> | 813.413806 | 1608.793787 | 804.900532 | 1607.809771        | 804.408524 | A | 246.156066         | 123.581671 | 229.129517  | 115.068396        |             |          |
| 17 |                    |            |             |            |                    |            | R | 175.118952         | 88.063114  | 158.092403  | 79.549839         |             |          |

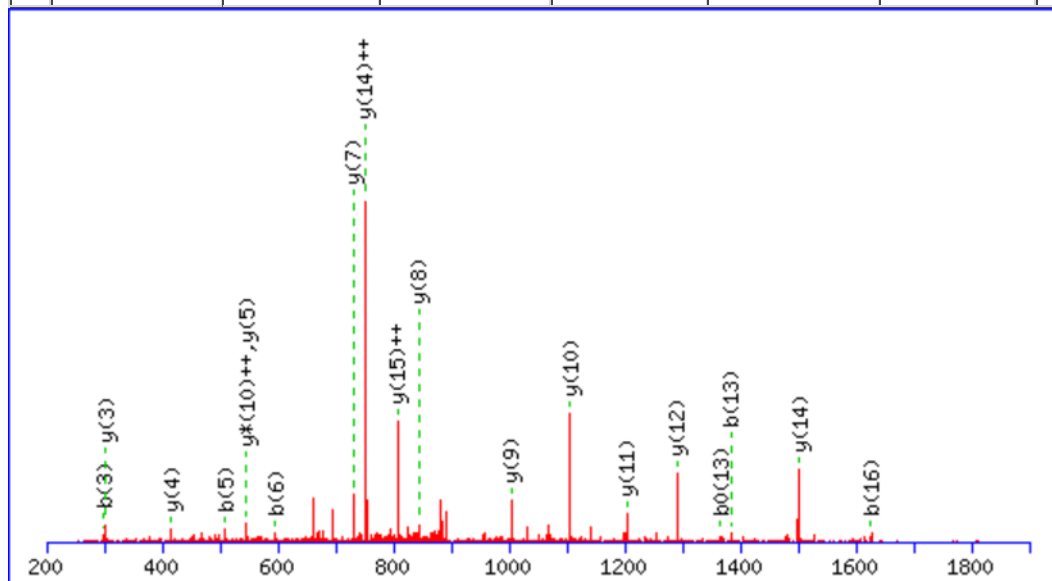

## Peptide View

MS/MS Fragmentation of **GLAEAAGPR**

Found in **IPI00290826**, Tax\_Id=9606 Gene\_Symbol=FAM174A Membrane protein FAM174A

**Experiment:** 46 - PyA-1 **Fraction:** PyA-1

Match to Query 1202: 840.445848 from(421.230200,2+)

Title: OECHL100310\_07.3767.3767.2.dta

Data file \\BOROMIR\Masse\Data LTQ-Orbitrap\Chrystelle Lacroix\Etude clinique sJPU\OECHL100310\_07.raw

**Monoisotopic mass of neutral peptide Mr(calc):** 840.445343**Fixed modifications:** Carbamidomethyl (C) (apply to specified residues or termini only)**Ions Score:**

**51 Expect:** 0.00053**Matches :** 10/64 fragment ions using 14 most intense peaks ([help](#))

| # | b                 | b <sup>++</sup> | b <sup>0</sup> | b <sup>0++</sup> | Seq. | y                 | y <sup>++</sup> | y*         | y <sup>*++</sup> | y <sup>0</sup> | y <sup>0++</sup> | # |
|---|-------------------|-----------------|----------------|------------------|------|-------------------|-----------------|------------|------------------|----------------|------------------|---|
| 1 | 58.028740         | 29.518008       |                |                  | G    |                   |                 |            |                  |                |                  | 9 |
| 2 | <b>171.112804</b> | 86.060040       |                |                  | L    | 784.431179        | 392.719228      | 767.404630 | 384.205953       | 766.420614     | 383.713945       | 8 |
| 3 | <b>242.149918</b> | 121.578597      |                |                  | A    | <b>671.347115</b> | 336.177196      | 654.320566 | 327.663921       | 653.336550     | 327.171913       | 7 |
| 4 | 371.192511        | 186.099894      | 353.181946     | 177.094611       | E    | <b>600.310001</b> | 300.658639      | 583.283452 | 292.145364       | 582.299436     | 291.653356       | 6 |
| 5 | 442.229625        | 221.618450      | 424.219060     | 212.613168       | A    | <b>471.267408</b> | 236.137342      | 454.240859 | 227.624067       |                |                  | 5 |
| 6 | <b>513.266739</b> | 257.137008      | 495.256174     | 248.131725       | A    | <b>400.230294</b> | 200.618785      | 383.203745 | 192.105510       |                |                  | 4 |
| 7 | <b>570.288203</b> | 285.647740      | 552.277638     | 276.642457       | G    | <b>329.193180</b> | 165.100228      | 312.166631 | 156.586953       |                |                  | 3 |
| 8 | 667.340967        | 334.174122      | 649.330402     | 325.168839       | P    | <b>272.171716</b> | 136.589496      | 255.145167 | 128.076221       |                |                  | 2 |
| 9 |                   |                 |                |                  | R    | 175.118952        | 88.063114       | 158.092403 | 79.549839        |                |                  | 1 |

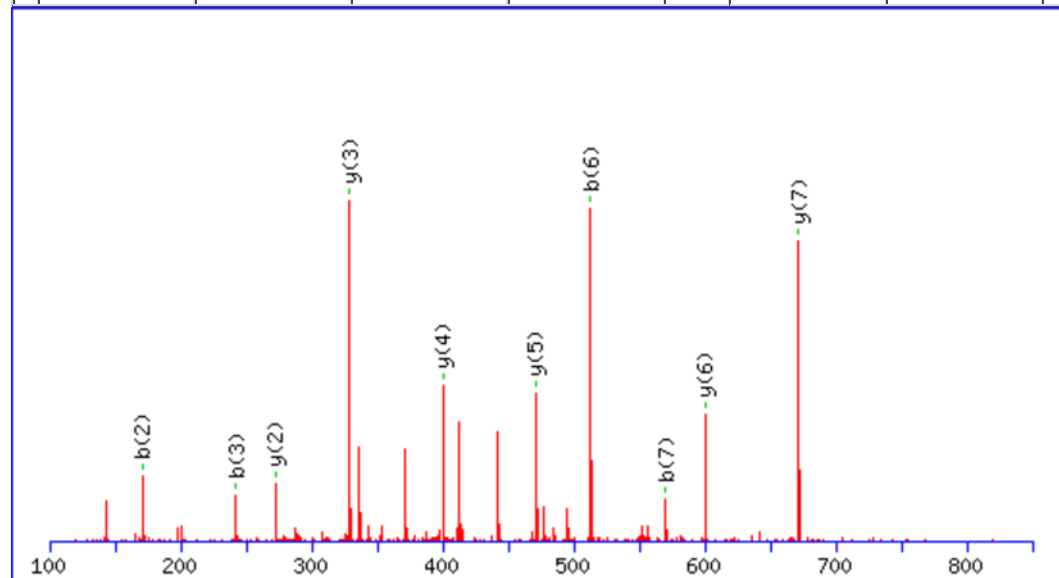



## Peptide View

MS/MS Fragmentation of **SNAQGIDLNR**

Found in **IPI00031121**, Tax\_Id=9606 Gene\_Symbol=CPE Carboxypeptidase E precursor

**Experiment:** 46 - PyA-1 **Fraction:** PyA-1

Match to Query 4561: 1086.541648 from(544.278100,2+)

Title: OECHL100310\_07.5840.5840.2.dta

Data file \\BOROMIR\Masse\Data LTQ-Orbitrap\Chrystelle Lacroix\Etude clinique sJPU\OECHL100310\_07.raw

**Monoisotopic mass of neutral peptide Mr(calc):** 1086.541763 **Fixed modifications:** Carbamidomethyl (C) (apply to specified residues or termini only) **Ions**

**Score:** 58 **Expect:** 0.00016 **Matches :** 20/100 fragment ions using 37 most intense peaks ([help](#))

| #  | b                 | b <sup>++</sup> | b*                | b <sup>*++</sup> | b <sup>0</sup> | b <sup>0++</sup> | Seq. | y                 | y <sup>++</sup>   | y*                | y <sup>*++</sup> | y <sup>0</sup> | y <sup>0++</sup> | #  |
|----|-------------------|-----------------|-------------------|------------------|----------------|------------------|------|-------------------|-------------------|-------------------|------------------|----------------|------------------|----|
| 1  | 88.039304         | 44.523290       |                   |                  | 70.028739      | 35.518008        | S    |                   |                   |                   |                  |                |                  | 10 |
| 2  | <b>202.082231</b> | 101.544753      | <b>185.055682</b> | 93.031479        | 184.071666     | 92.539471        | N    | 1000.517033       | 500.762155        | 983.490484        | 492.248880       | 982.506468     | 491.756872       | 9  |
| 3  | <b>273.119345</b> | 137.063311      | 256.092796        | 128.550036       | 255.108780     | 128.058028       | A    | <b>886.474106</b> | <b>443.740691</b> | 869.447557        | 435.227416       | 868.463541     | 434.735408       | 8  |
| 4  | <b>401.177923</b> | 201.092600      | 384.151374        | 192.579325       | 383.167358     | 192.087317       | Q    | <b>815.436992</b> | 408.222134        | <b>798.410443</b> | 399.708859       | 797.426427     | 399.216851       | 7  |
| 5  | <b>458.199387</b> | 229.603332      | 441.172838        | 221.090057       | 440.188822     | 220.598049       | G    | <b>687.378414</b> | 344.192845        | 670.351865        | 335.679570       | 669.367849     | 335.187562       | 6  |
| 6  | <b>571.283451</b> | 286.145364      | 554.256902        | 277.632089       | 553.272886     | 277.140081       | I    | <b>630.356950</b> | 315.682113        | 613.330401        | 307.168838       | 612.346385     | 306.676830       | 5  |
| 7  | <b>686.310394</b> | 343.658835      | 669.283845        | 335.145560       | 668.299829     | 334.653552       | D    | <b>517.272886</b> | 259.140081        | 500.246337        | 250.626806       | 499.262321     | 250.134798       | 4  |
| 8  | 799.394458        | 400.200867      | <b>782.367909</b> | 391.687592       | 781.383893     | 391.195585       | L    | <b>402.245943</b> | <b>201.626609</b> | 385.219394        | 193.113335       |                |                  | 3  |
| 9  | <b>913.437385</b> | 457.222331      | 896.410836        | 448.709056       | 895.426820     | 448.217048       | N    | <b>289.161879</b> | 145.084577        | 272.135330        | 136.571303       |                |                  | 2  |
| 10 |                   |                 |                   |                  |                |                  | R    | <b>175.118952</b> | 88.063114         | 158.092403        | 79.549839        |                |                  | 1  |

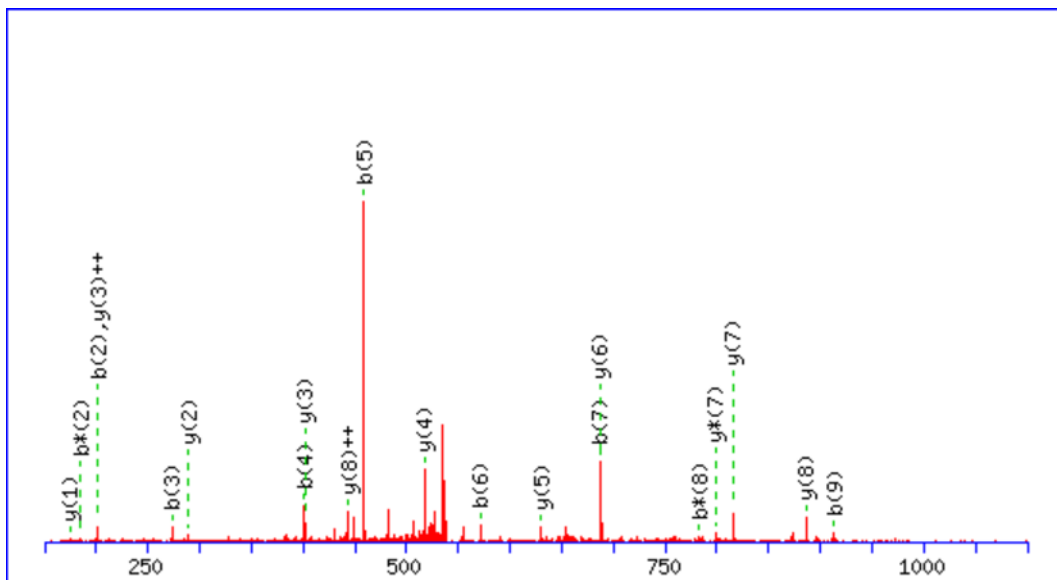

## Peptide View

MS/MS Fragmentation of **AHGQESAI FNEVAPGYFSR**

Found in **IPI00170635**, Tax\_Id=9606 Gene\_Symbol=SECTM1 Secreted and transmembrane protein 1

**Experiment:** 31 - OPA-1 **Fraction:** OPA-1

Match to Query 14266: 2078.983448 from(1040.499000,2+)

Title: OECHL100310\_05.17036.17036.2.dta

Data file \\BOROMIR\Masse\Data LTQ-Orbitrap\Chrystelle Lacroix\Etude clinique sJPU\OECHL100310\_05.raw

**Monoisotopic mass of neutral peptide Mr(calc):** 2078.980988 **Fixed modifications:** Carbamidomethyl (C) (apply to specified residues or termini only) **Ions**

**Score:** 94 **Expect:** 5.8e-008 **Matches :** 29/200 fragment ions using 51 most intense peaks ([help](#))

| # | b                 | b <sup>++</sup> | b*         | b <sup>*++</sup> | b <sup>0</sup> | b <sup>0++</sup> | Seq. | y                  | y <sup>++</sup> | y*                 | y <sup>*++</sup>  | y <sup>0</sup> | y <sup>0++</sup> |
|---|-------------------|-----------------|------------|------------------|----------------|------------------|------|--------------------|-----------------|--------------------|-------------------|----------------|------------------|
| 1 | 72.044390         | 36.525833       |            |                  |                |                  | A    |                    |                 |                    |                   |                |                  |
| 2 | 209.103302        | 105.055289      |            |                  |                |                  | H    | 2008.951166        | 1004.979221     | 1991.924617        | 996.465947        | 1990.940601    | 995.973          |
| 3 | 266.124766        | 133.566021      |            |                  |                |                  | G    | <b>1871.892254</b> | 936.449765      | 1854.865705        | 927.936491        | 1853.881689    | 927.444          |
| 4 | 394.183344        | 197.595310      | 377.156795 | 189.082035       |                |                  | Q    | 1814.870790        | 907.939033      | <b>1797.844241</b> | <b>899.425759</b> | 1796.860225    | 898.933          |
| 5 | <b>523.225937</b> | 262.116607      | 506.199388 | 253.603332       | 505.215372     | 253.111324       | E    | <b>1686.812212</b> | 843.909744      | 1669.785663        | 835.396470        | 1668.801647    | 834.904          |

|    |                    |                   |                    |            |                   |            |   |                    |            |             |                   |             |                |
|----|--------------------|-------------------|--------------------|------------|-------------------|------------|---|--------------------|------------|-------------|-------------------|-------------|----------------|
| 6  | <b>610.257965</b>  | 305.632621        | 593.231416         | 297.119346 | <b>592.247400</b> | 296.627338 | S | <b>1557.769619</b> | 779.388448 | 1540.743070 | 770.875173        | 1539.759054 | 770.383        |
| 7  | <b>681.295079</b>  | 341.151178        | 664.268530         | 332.637903 | 663.284514        | 332.145895 | A | <b>1470.737591</b> | 735.872434 | 1453.711042 | <b>727.359159</b> | 1452.727026 | <b>726.867</b> |
| 8  | 794.379143         | 397.693210        | 777.352594         | 389.179935 | 776.368578        | 388.687927 | I | <b>1399.700477</b> | 700.353877 | 1382.673928 | 691.840602        | 1381.689912 | 691.348        |
| 9  | <b>941.447557</b>  | 471.227417        | 924.421008         | 462.714142 | 923.436992        | 462.222134 | F | <b>1286.616413</b> | 643.811845 | 1269.589864 | 635.298570        | 1268.605848 | 634.806        |
| 10 | 1055.490484        | 528.248880        | 1038.463935        | 519.735606 | 1037.479919       | 519.243597 | N | <b>1139.547999</b> | 570.277638 | 1122.521450 | 561.764363        | 1121.537434 | 561.272        |
| 11 | <b>1184.533077</b> | 592.770176        | 1167.506528        | 584.256902 | 1166.522512       | 583.764894 | E | <b>1025.505072</b> | 513.256174 | 1008.478523 | 504.742900        | 1007.494507 | 504.250        |
| 12 | <b>1283.601491</b> | 642.304383        | 1266.574942        | 633.791109 | 1265.590926       | 633.299101 | V | <b>896.462479</b>  | 448.734878 | 879.435930  | 440.221603        | 878.451914  | 439.729        |
| 13 | <b>1354.638605</b> | 677.822940        | 1337.612056        | 669.309666 | 1336.628040       | 668.817658 | A | <b>797.394065</b>  | 399.200671 | 780.367516  | 390.687396        | 779.383500  | 390.195        |
| 14 | 1451.691369        | <b>726.349322</b> | 1434.664820        | 717.836048 | 1433.680804       | 717.344040 | P | <b>726.356951</b>  | 363.682114 | 709.330402  | 355.168839        | 708.346386  | 354.676        |
| 15 | 1508.712833        | 754.860054        | 1491.686284        | 746.346780 | 1490.702268       | 745.854772 | G | <b>629.304187</b>  | 315.155732 | 612.277638  | 306.642457        | 611.293622  | 306.150        |
| 16 | 1671.776162        | 836.391719        | 1654.749613        | 827.878445 | 1653.765597       | 827.386436 | Y | <b>572.282723</b>  | 286.645000 | 555.256174  | 278.131725        | 554.272158  | 277.639        |
| 17 | 1818.844576        | 909.925926        | <b>1801.818027</b> | 901.412652 | 1800.834011       | 900.920643 | F | <b>409.219394</b>  | 205.113335 | 392.192845  | 196.600061        | 391.208829  | 196.108        |
| 18 | <b>1905.876604</b> | 953.441940        | 1888.850055        | 944.928666 | 1887.866039       | 944.436658 | S | 262.150980         | 131.579128 | 245.124431  | 123.065854        | 244.140415  | 122.573        |
| 19 |                    |                   |                    |            |                   |            | R | 175.118952         | 88.063114  | 158.092403  | 79.549840         |             |                |

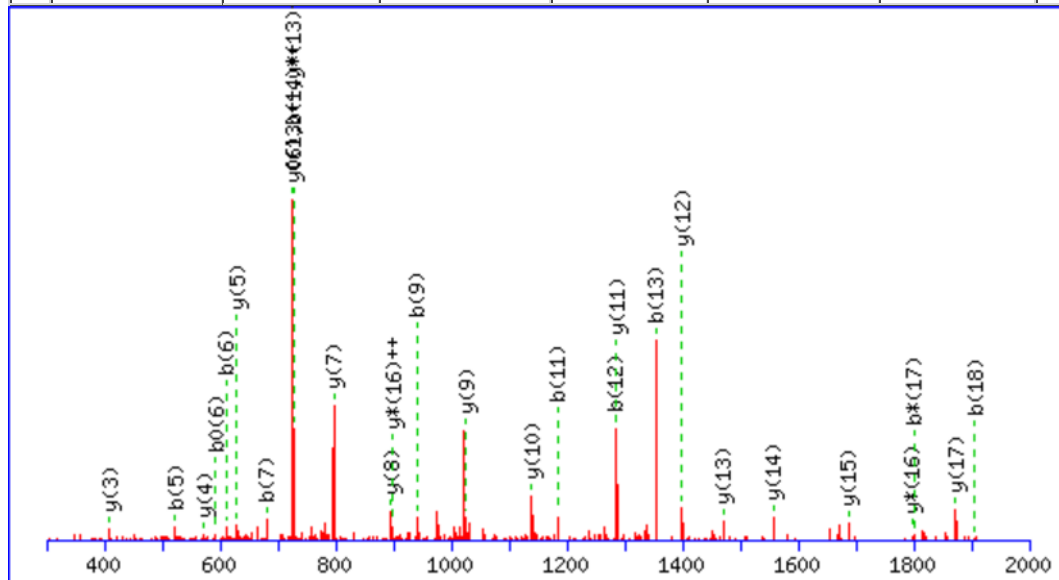

## Peptide View

MS/MS Fragmentation of **TVAGPVGGSLSVQCPYEKEHR**

Found in **IPI00414784**, Tax\_Id=9606 Gene\_Symbol=CD300A Isoform 1 of CMRF35-like molecule 8

**Experiment:** 31 - OPA-1 **Fraction:** OPA-1

Match to Query 15149: 2270.111448 from(1136.063000,2+)

Title: OECHL100310\_05.10513.10513.2.dta

Data file \\BOROMIR\Masse\Data LTQ-Orbitrap\Chrystelle Lacroix\Etude clinique sJPU\OECHL100310\_05.raw

**Monoisotopic mass of neutral peptide Mr(calc):** 2270.111374**Fixed modifications:** Carbamidomethyl (C) (apply to specified residues or termini only)**Ions**

**Score:** 80 **Expect:** 2.4e-006**Matches :** 28/212 fragment ions using 51 most intense peaks ([help](#))

| #  | b           | b <sup>++</sup> | b*          | b <sup>*++</sup> | b <sup>0</sup> | b <sup>0++</sup> | Seq. | y           | y <sup>++</sup> | y*          | y <sup>*++</sup> | y <sup>0</sup> |    |
|----|-------------|-----------------|-------------|------------------|----------------|------------------|------|-------------|-----------------|-------------|------------------|----------------|----|
| 1  | 102.054955  | 51.531116       |             |                  | 84.044390      | 42.525833        | T    |             |                 |             |                  |                |    |
| 2  | 201.123369  | 101.065322      |             |                  | 183.112804     | 92.060040        | V    | 2170.070965 | 1085.539120     | 2153.044416 | 1077.025846      | 2152.060400    | 10 |
| 3  | 272.160483  | 136.583879      |             |                  | 254.149918     | 127.578597       | A    | 2071.002551 | 1036.004913     | 2053.976002 | 1027.491639      | 2052.991986    | 10 |
| 4  | 329.181947  | 165.094611      |             |                  | 311.171382     | 156.089329       | G    | 1999.965437 | 1000.486357     | 1982.938888 | 991.973082       | 1981.954872    | 9  |
| 5  | 426.234711  | 213.620994      |             |                  | 408.224146     | 204.615711       | P    | 1942.943973 | 971.975625      | 1925.917424 | 963.462350       | 1924.933408    | 9  |
| 6  | 525.303125  | 263.155201      |             |                  | 507.292560     | 254.149918       | V    | 1845.891209 | 923.449243      | 1828.864660 | 914.935968       | 1827.880644    | 9  |
| 7  | 582.324589  | 291.665933      |             |                  | 564.314024     | 282.660650       | G    | 1746.822795 | 873.915036      | 1729.796246 | 865.401761       | 1728.812230    | 8  |
| 8  | 639.346053  | 320.176665      |             |                  | 621.335488     | 311.171382       | G    | 1689.801331 | 845.404304      | 1672.774782 | 836.891029       | 1671.790766    | 8  |
| 9  | 726.378081  | 363.692679      |             |                  | 708.367516     | 354.687396       | S    | 1632.779867 | 816.893572      | 1615.753318 | 808.380297       | 1614.769302    | 8  |
| 10 | 839.462145  | 420.234711      |             |                  | 821.451580     | 411.229428       | L    | 1545.747839 | 773.377558      | 1528.721290 | 764.864283       | 1527.737274    | 7  |
| 11 | 926.494173  | 463.750725      |             |                  | 908.483608     | 454.745442       | S    | 1432.663775 | 716.835526      | 1415.637226 | 708.322251       | 1414.653210    | 7  |
| 12 | 1025.562587 | 513.284932      |             |                  | 1007.552022    | 504.279649       | V    | 1345.631747 | 673.319512      | 1328.605198 | 664.806237       | 1327.621182    | 6  |
| 13 | 1153.621165 | 577.314221      | 1136.594616 | 568.800946       | 1135.610600    | 568.308938       | Q    | 1246.563333 | 623.785305      | 1229.536784 | 615.272030       | 1228.552768    | 6  |
| 14 | 1313.651814 | 657.329545      | 1296.625265 | 648.816271       | 1295.641249    | 648.324263       | C    | 1118.504755 | 559.756016      | 1101.478206 | 551.242741       | 1100.494190    | 5  |
| 15 | 1410.704578 | 705.855927      | 1393.678029 | 697.342653       | 1392.694013    | 696.850645       | P    | 958.474106  | 479.740691      | 941.447557  | 471.227417       | 940.463541     | 4  |
| 16 | 1573.767907 | 787.387592      | 1556.741358 | 778.874317       | 1555.757342    | 778.382309       | Y    | 861.421342  | 431.214309      | 844.394793  | 422.701035       | 843.410777     | 4  |
| 17 | 1702.810500 | 851.908888      | 1685.783951 | 843.395614       | 1684.799935    | 842.903606       | E    | 698.358013  | 349.682645      | 681.331464  | 341.169370       | 680.347448     | 3  |
| 18 | 1830.905463 | 915.956370      | 1813.878914 | 907.443095       | 1812.894898    | 906.951087       | K    | 569.315420  | 285.161348      | 552.288871  | 276.648074       | 551.304855     | 2  |
| 19 | 1959.948056 | 980.477666      | 1942.921507 | 971.964392       | 1941.937491    | 971.472384       | E    | 441.220457  | 221.113867      | 424.193908  | 212.600592       | 423.209892     | 2  |

|    |             |             |             |             |             |             |   |            |            |            |            |  |  |
|----|-------------|-------------|-------------|-------------|-------------|-------------|---|------------|------------|------------|------------|--|--|
| 20 | 2097.006968 | 1049.007122 | 2079.980419 | 1040.493847 | 2078.996403 | 1040.001840 | H | 312.177864 | 156.592570 | 295.151315 | 148.079295 |  |  |
| 21 |             |             |             |             |             |             | R | 175.118952 | 88.063114  | 158.092403 | 79.549839  |  |  |

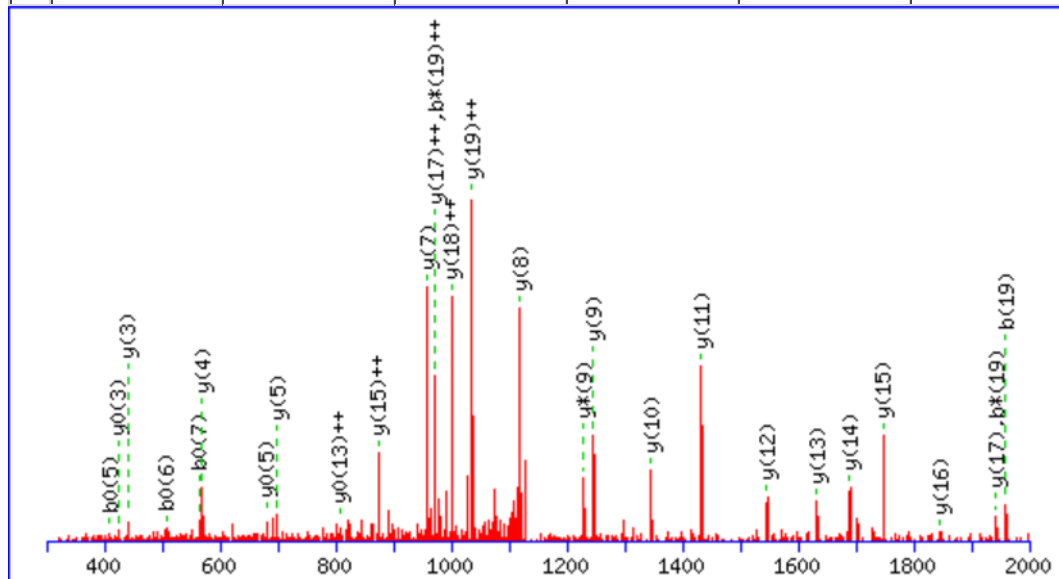

## Peptide View

MS/MS Fragmentation of **DFSLTSSSQTPGATK**

Found in **IPI00291300**, Tax\_Id=9606 Gene\_Symbol=PODXL2 Putative uncharacterized protein PODXL2

**Experiment:** 31 - OPA-1 **Fraction:** OPA-1

Match to Query 9977: 1525.725648 from(763.870100,2+)

Title: OECHL100310\_05.10808.10808.2.dta

Data file \\BOROMIR\Masse\Data LTQ-Orbitrap\Chrystelle Lacroix\Etude clinique sJPU\OECHL100310\_05.raw

**Monoisotopic mass of neutral peptide Mr(calc):** 1525.726028 **Fixed modifications:** Carbamidomethyl (C) (apply to specified residues or termini only) **Ions**

**Score:** 94 **Expect:** 3.9e-008 **Matches :** 29/150 fragment ions using 38 most intense peaks ([help](#))

| # | b                 | b <sup>++</sup> | b* | b* <sup>++</sup> | b <sup>0</sup>    | b <sup>0++</sup> | Seq. | y                  | y <sup>++</sup>   | y*          | y* <sup>++</sup> | y <sup>0</sup> | y <sup>0++</sup> |
|---|-------------------|-----------------|----|------------------|-------------------|------------------|------|--------------------|-------------------|-------------|------------------|----------------|------------------|
| 1 | 116.034219        | 58.520748       |    |                  | 98.023654         | 49.515465        | D    |                    |                   |             |                  |                |                  |
| 2 | <b>263.102633</b> | 132.054954      |    |                  | 245.092068        | 123.049672       | F    | 1411.706351        | 706.356813        | 1394.679802 | 697.843539       | 1393.695786    | 697.3515         |
| 3 | <b>350.134661</b> | 175.570968      |    |                  | <b>332.124096</b> | 166.565686       | S    | <b>1264.637937</b> | <b>632.822607</b> | 1247.611388 | 624.309332       | 1246.627372    | 623.8173         |

|    |             |            |             |            |             |            |   |             |            |             |            |             |          |
|----|-------------|------------|-------------|------------|-------------|------------|---|-------------|------------|-------------|------------|-------------|----------|
| 4  | 463.218725  | 232.113001 |             |            | 445.208160  | 223.107718 | L | 1177.605909 | 589.306592 | 1160.579360 | 580.793318 | 1159.595344 | 580.3013 |
| 5  | 564.266404  | 282.636840 |             |            | 546.255839  | 273.631558 | T | 1064.521845 | 532.764561 | 1047.495296 | 524.251286 | 1046.511280 | 523.7592 |
| 6  | 651.298432  | 326.152854 |             |            | 633.287867  | 317.147572 | S | 963.474166  | 482.240721 | 946.447617  | 473.727446 | 945.463601  | 473.2354 |
| 7  | 738.330460  | 369.668868 |             |            | 720.319895  | 360.663586 | S | 876.442138  | 438.724707 | 859.415589  | 430.211432 | 858.431573  | 429.7194 |
| 8  | 825.362488  | 413.184882 |             |            | 807.351923  | 404.179599 | S | 789.410110  | 395.208693 | 772.383561  | 386.695418 | 771.399545  | 386.2034 |
| 9  | 953.421066  | 477.214171 | 936.394517  | 468.700897 | 935.410501  | 468.208889 | Q | 702.378082  | 351.692679 | 685.351533  | 343.179404 | 684.367517  | 342.6873 |
| 10 | 1054.468745 | 527.738010 | 1037.442196 | 519.224736 | 1036.458180 | 518.732728 | T | 574.319504  | 287.663390 | 557.292955  | 279.150115 | 556.308939  | 278.6581 |
| 11 | 1151.521509 | 576.264392 | 1134.494960 | 567.751118 | 1133.510944 | 567.259110 | P | 473.271825  | 237.139550 | 456.245276  | 228.626276 | 455.261260  | 228.1342 |
| 12 | 1208.542973 | 604.775124 | 1191.516424 | 596.261850 | 1190.532408 | 595.769842 | G | 376.219061  | 188.613168 | 359.192512  | 180.099894 | 358.208496  | 179.6078 |
| 13 | 1279.580087 | 640.293681 | 1262.553538 | 631.780407 | 1261.569522 | 631.288399 | A | 319.197597  | 160.102436 | 302.171048  | 151.589162 | 301.187032  | 151.0971 |
| 14 | 1380.627766 | 690.817521 | 1363.601217 | 682.304246 | 1362.617201 | 681.812238 | T | 248.160483  | 124.583879 | 231.133934  | 116.070605 | 230.149918  | 115.5785 |
| 15 |             |            |             |            |             |            | K | 147.112804  | 74.060040  | 130.086255  | 65.546765  |             |          |

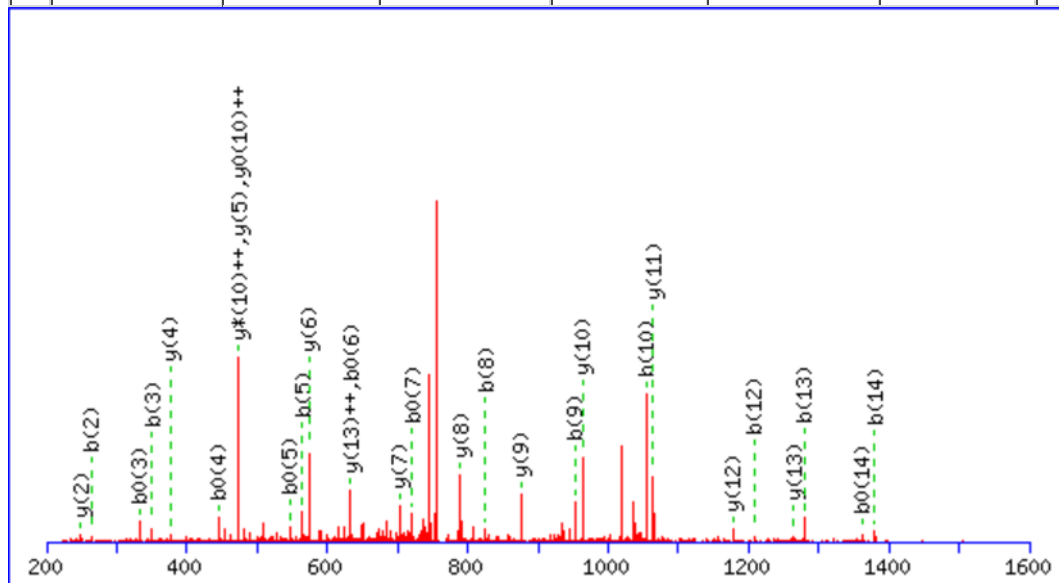

## Peptide View

MS/MS Fragmentation of **GLDTSLGAVQSDTGR**

Found in **IPI00289931**, Tax\_Id=9606 Gene\_Symbol=MADCAM1 MADCAM1 protein

**Experiment:** 31 - OPA-1 **Fraction:** OPA-1

Match to Query 9423: 1475.722248 from(738.868400,2+)

Title: OECHL100310\_05.11297.11297.2.dta

Data file \\BOROMIR\Masse\Data LTQ-Orbitrap\Chrystelle Lacroix\Etude clinique sJPU\OECHL100310\_05.raw

**Monoisotopic mass of neutral peptide Mr(calc):** 1475.721619**Fixed modifications:** Carbamidomethyl (C) (apply to specified residues or termini only)**Ions**

**Score:** 87 **Expect:** 3.2e-007**Matches :** 22/142 fragment ions using 26 most intense peaks ([help](#))

| #  | b                  | b <sup>++</sup> | b*          | b* <sup>++</sup> | b <sup>0</sup> | b <sup>0++</sup> | Seq.     | y                  | y <sup>++</sup> | y*          | y* <sup>++</sup>  | y <sup>0</sup> | y <sup>0++</sup> |
|----|--------------------|-----------------|-------------|------------------|----------------|------------------|----------|--------------------|-----------------|-------------|-------------------|----------------|------------------|
| 1  | 58.028740          | 29.518008       |             |                  |                |                  | <b>G</b> |                    |                 |             |                   |                |                  |
| 2  | 171.112804         | 86.060040       |             |                  |                |                  | <b>L</b> | 1419.707414        | 710.357345      | 1402.680865 | 701.844071        | 1401.696849    | 701.3520         |
| 3  | <b>286.139747</b>  | 143.573512      |             |                  | 268.129182     | 134.568229       | <b>D</b> | <b>1306.623350</b> | 653.815313      | 1289.596801 | 645.302039        | 1288.612785    | <b>644.8100</b>  |
| 4  | <b>387.187426</b>  | 194.097351      |             |                  | 369.176861     | 185.092069       | <b>T</b> | <b>1191.596407</b> | 596.301842      | 1174.569858 | <b>587.788567</b> | 1173.585842    | <b>587.2965</b>  |
| 5  | <b>474.219454</b>  | 237.613365      |             |                  | 456.208889     | 228.608082       | <b>S</b> | <b>1090.548728</b> | 545.778002      | 1073.522179 | 537.264728        | 1072.538163    | 536.7727         |
| 6  | <b>587.303518</b>  | 294.155397      |             |                  | 569.292953     | 285.150115       | <b>L</b> | <b>1003.516700</b> | 502.261988      | 986.490151  | 493.748714        | 985.506135     | 493.2567         |
| 7  | <b>644.324982</b>  | 322.666129      |             |                  | 626.314417     | 313.660847       | <b>G</b> | <b>890.432636</b>  | 445.719956      | 873.406087  | 437.206682        | 872.422071     | 436.7146         |
| 8  | 715.362096         | 358.184686      |             |                  | 697.351531     | 349.179404       | <b>A</b> | 833.411172         | 417.209224      | 816.384623  | 408.695950        | 815.400607     | 408.2039         |
| 9  | 814.430510         | 407.718893      |             |                  | 796.419945     | 398.713611       | <b>V</b> | 762.374058         | 381.690667      | 745.347509  | 373.177393        | 744.363493     | 372.6853         |
| 10 | <b>942.489088</b>  | 471.748182      | 925.462539  | 463.234908       | 924.478523     | 462.742900       | <b>Q</b> | <b>663.305644</b>  | 332.156460      | 646.279095  | 323.643186        | 645.295079     | 323.1511         |
| 11 | <b>1029.521116</b> | 515.264196      | 1012.494567 | 506.750922       | 1011.510551    | 506.258914       | <b>S</b> | <b>535.247066</b>  | 268.127171      | 518.220517  | 259.613897        | 517.236501     | 259.1218         |
| 12 | <b>1144.548059</b> | 572.777668      | 1127.521510 | 564.264393       | 1126.537494    | 563.772385       | <b>D</b> | <b>448.215038</b>  | 224.611157      | 431.188489  | 216.097882        | 430.204473     | 215.6058         |
| 13 | <b>1245.595738</b> | 623.301507      | 1228.569189 | 614.788233       | 1227.585173    | 614.296225       | <b>T</b> | <b>333.188095</b>  | 167.097685      | 316.161546  | 158.584411        | 315.177530     | 158.0924         |
| 14 | 1302.617202        | 651.812239      | 1285.590653 | 643.298965       | 1284.606637    | 642.806957       | <b>G</b> | <b>232.140416</b>  | 116.573846      | 215.113867  | 108.060571        |                |                  |
| 15 |                    |                 |             |                  |                |                  | <b>R</b> | 175.118952         | 88.063114       | 158.092403  | 79.549839         |                |                  |

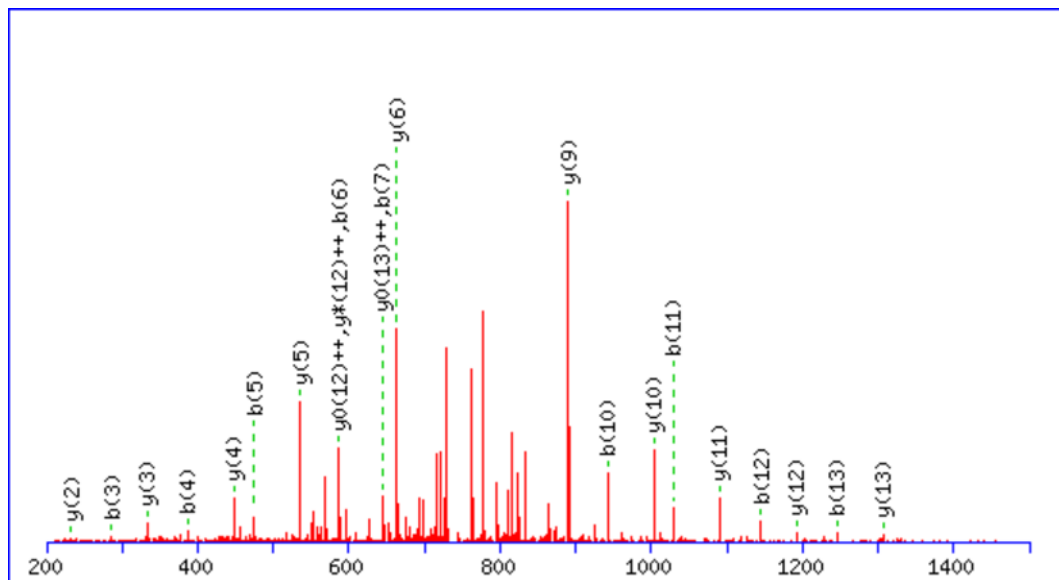

## Peptide View

MS/MS Fragmentation of **EVQLVESGGGLV~~K~~PGGSLR**

Found in **IPI00783024**, Tax\_Id=9606 Gene\_Symbol=- Myosin-reactive immunoglobulin heavy chain variable region (Fragment)

**Experiment:** 31 - OPA-1 **Fraction:** OPA-1

Match to Query 13178: 1881.032448 from(941.523500,2+)

Title: OECHL100310\_05.13675.13675.2.dta

Data file \\BOROMIR\Masse\Data LTQ-Orbitrap\Chrystelle Lacroix\Etude clinique sJPU\OECHL100310\_05.raw

**Monoisotopic mass of neutral peptide Mr(calc):** 1881.031982**Fixed modifications:** Carbamidomethyl (C) (apply to specified residues or termini only)**Ions**

**Score:** 77 **Expect:** 1e-006**Matches :** 14/208 fragment ions using 16 most intense peaks ([help](#))

| # | b                 | b <sup>++</sup> | b <sup>*</sup> | b <sup>*++</sup> | b <sup>0</sup>    | b <sup>0++</sup> | Seq.     | y                  | y <sup>++</sup> | y <sup>*</sup> | y <sup>*++</sup> | y <sup>0</sup> | y <sup>0++</sup> |
|---|-------------------|-----------------|----------------|------------------|-------------------|------------------|----------|--------------------|-----------------|----------------|------------------|----------------|------------------|
| 1 | 130.049869        | 65.528572       |                |                  | 112.039304        | 56.523290        | <b>E</b> |                    |                 |                |                  |                |                  |
| 2 | 229.118283        | 115.062780      |                |                  | 211.107718        | 106.057497       | <b>V</b> | 1752.996660        | 877.001968      | 1735.970111    | 868.488694       | 1734.986095    | 867.9966         |
| 3 | 357.176861        | 179.092069      | 340.150312     | 170.578794       | <b>339.166296</b> | 170.086786       | <b>Q</b> | <b>1653.928246</b> | 827.467761      | 1636.901697    | 818.954487       | 1635.917681    | 818.4624         |
| 4 | <b>470.260925</b> | 235.634101      | 453.234376     | 227.120826       | <b>452.250360</b> | 226.628818       | <b>L</b> | <b>1525.869668</b> | 763.438472      | 1508.843119    | 754.925198       | 1507.859103    | 754.4331         |
| 5 | 569.329339        | 285.168308      | 552.302790     | 276.655033       | 551.318774        | 276.163025       | <b>V</b> | <b>1412.785604</b> | 706.896440      | 1395.759055    | 698.383166       | 1394.775039    | 697.8911         |



|    |                    |            |             |                   |             |            |   |                    |            |             |            |             |          |
|----|--------------------|------------|-------------|-------------------|-------------|------------|---|--------------------|------------|-------------|------------|-------------|----------|
| 6  | 698.371932         | 349.689604 | 681.345383  | 341.176330        | 680.361367  | 340.684322 | E | <b>1313.717190</b> | 657.362233 | 1296.690641 | 648.848959 | 1295.706625 | 648.3569 |
| 7  | 785.403960         | 393.205618 | 768.377411  | 384.692344        | 767.393395  | 384.200336 | S | <b>1184.674597</b> | 592.840937 | 1167.648048 | 584.327662 | 1166.664032 | 583.8356 |
| 8  | 842.425424         | 421.716350 | 825.398875  | 413.203076        | 824.414859  | 412.711068 | G | 1097.642569        | 549.324923 | 1080.616020 | 540.811648 | 1079.632004 | 540.3196 |
| 9  | 899.446888         | 450.227082 | 882.420339  | 441.713808        | 881.436323  | 441.221800 | G | <b>1040.621105</b> | 520.814191 | 1023.594556 | 512.300916 | 1022.610540 | 511.8089 |
| 10 | 956.468352         | 478.737814 | 939.441803  | <b>470.224540</b> | 938.457787  | 469.732532 | G | 983.599641         | 492.303459 | 966.573092  | 483.790184 | 965.589076  | 483.2981 |
| 11 | 1069.552416        | 535.279846 | 1052.525867 | 526.766572        | 1051.541851 | 526.274564 | L | 926.578177         | 463.792727 | 909.551628  | 455.279452 | 908.567612  | 454.7874 |
| 12 | 1168.620830        | 584.814053 | 1151.594281 | 576.300779        | 1150.610265 | 575.808771 | V | <b>813.494113</b>  | 407.250695 | 796.467564  | 398.737420 | 795.483548  | 398.2454 |
| 13 | 1296.715793        | 648.861535 | 1279.689244 | 640.348260        | 1278.705228 | 639.856252 | K | <b>714.425699</b>  | 357.716487 | 697.399150  | 349.203213 | 696.415134  | 348.7112 |
| 14 | 1393.768557        | 697.387917 | 1376.742008 | 688.874642        | 1375.757992 | 688.382634 | P | <b>586.330736</b>  | 293.669006 | 569.304187  | 285.155731 | 568.320171  | 284.6637 |
| 15 | 1450.790021        | 725.898649 | 1433.763472 | 717.385374        | 1432.779456 | 716.893366 | G | 489.277972         | 245.142624 | 472.251423  | 236.629349 | 471.267407  | 236.1373 |
| 16 | 1507.811485        | 754.409381 | 1490.784936 | 745.896106        | 1489.800920 | 745.404098 | G | 432.256508         | 216.631892 | 415.229959  | 208.118617 | 414.245943  | 207.6266 |
| 17 | 1594.843513        | 797.925395 | 1577.816964 | 789.412120        | 1576.832948 | 788.920112 | S | 375.235044         | 188.121160 | 358.208495  | 179.607885 | 357.224479  | 179.1158 |
| 18 | <b>1707.927577</b> | 854.467427 | 1690.901028 | 845.954152        | 1689.917012 | 845.462144 | L | 288.203016         | 144.605146 | 271.176467  | 136.091871 |             |          |
| 19 |                    |            |             |                   |             |            | R | 175.118952         | 88.063114  | 158.092403  | 79.549839  |             |          |

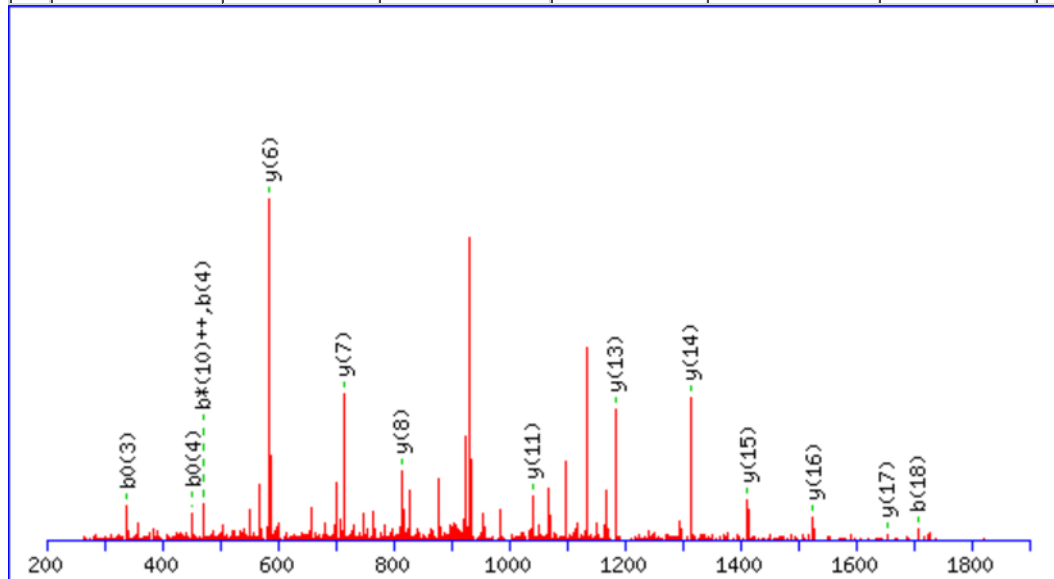

## Peptide View

MS/MS Fragmentation of **LLYDASNLETGVPSR**

Found in **IPI00003111**, Tax\_Id=9606 Gene\_Symbol=LOC652694 Ig kappa chain V-I region AU

**Experiment:** 31 - OPA-1 **Fraction:** OPA-1

Match to Query 12123: 1746.916048 from(874.465300,2+)

Title: OECHL100310\_05.16859.16859.2.dta

Data file \\BOROMIR\Masse\Data LTQ-Orbitrap\Chrystelle Lacroix\Etude clinique sJPU\OECHL100310\_05.raw

**Monoisotopic mass of neutral peptide Mr(calc):** 1746.915192**Fixed modifications:** Carbamidomethyl (C) (apply to specified residues or termini only)**Ions**

**Score:** 74 **Expect:** 4e-006**Matches :** 32/156 fragment ions using 60 most intense peaks ([help](#))

| #  | b                  | b <sup>++</sup>   | b*                 | b <sup>*++</sup> | b <sup>0</sup>     | b <sup>0++</sup> | Seq. | y                  | y <sup>++</sup>   | y*                | y <sup>*++</sup> | y <sup>0</sup>     | y <sup>0++</sup> |
|----|--------------------|-------------------|--------------------|------------------|--------------------|------------------|------|--------------------|-------------------|-------------------|------------------|--------------------|------------------|
| 1  | 114.091340         | 57.549308         |                    |                  |                    |                  | L    |                    |                   |                   |                  |                    |                  |
| 2  | 227.175404         | 114.091340        |                    |                  |                    |                  | L    | 1634.838427        | 817.922852        | 1617.811878       | 809.409577       | 1616.827862        | 808.9175         |
| 3  | <b>340.259468</b>  | 170.633372        |                    |                  |                    |                  | I    | <b>1521.754363</b> | 761.380820        | 1504.727814       | 752.867545       | 1503.743798        | 752.3755         |
| 4  | 503.322797         | 252.165036        |                    |                  |                    |                  | Y    | 1408.670299        | <b>704.838788</b> | 1391.643750       | 696.325513       | <b>1390.659734</b> | 695.8335         |
| 5  | <b>618.349740</b>  | 309.678508        |                    |                  | 600.339175         | 300.673226       | D    | <b>1245.606970</b> | 623.307123        | 1228.580421       | 614.793849       | 1227.596405        | 614.3018         |
| 6  | <b>689.386854</b>  | 345.197065        |                    |                  | 671.376289         | 336.191782       | A    | <b>1130.580027</b> | 565.793652        | 1113.553478       | 557.280377       | 1112.569462        | 556.7883         |
| 7  | 776.418882         | 388.713079        |                    |                  | 758.408317         | 379.707796       | S    | <b>1059.542913</b> | 530.275095        | 1042.516364       | 521.761820       | 1041.532348        | 521.2698         |
| 8  | 890.461809         | 445.734542        | 873.435260         | 437.221268       | 872.451244         | 436.729260       | N    | <b>972.510885</b>  | 486.759081        | 955.484336        | 478.245806       | 954.500320         | 477.7537         |
| 9  | <b>1003.545873</b> | 502.276574        | <b>986.519324</b>  | 493.763300       | 985.535308         | 493.271292       | L    | <b>858.467958</b>  | 429.737617        | 841.441409        | 421.224343       | 840.457393         | 420.7323         |
| 10 | <b>1132.588466</b> | 566.797871        | 1115.561917        | 558.284597       | 1114.577901        | 557.792588       | E    | <b>745.383894</b>  | 373.195585        | 728.357345        | 364.682311       | <b>727.373329</b>  | 364.1903         |
| 11 | <b>1233.636145</b> | <b>617.321710</b> | 1216.609596        | 608.808436       | <b>1215.625580</b> | 608.316428       | T    | <b>616.341301</b>  | 308.674289        | 599.314752        | 300.161014       | 598.330736         | 299.6690         |
| 12 | <b>1290.657609</b> | 645.832442        | 1273.631060        | 637.319168       | <b>1272.647044</b> | 636.827160       | G    | <b>515.293622</b>  | 258.150449        | 498.267073        | 249.637175       | 497.283057         | 249.1451         |
| 13 | <b>1389.726023</b> | 695.366649        | <b>1372.699474</b> | 686.853375       | <b>1371.715458</b> | 686.361367       | V    | <b>458.272158</b>  | 229.639717        | 441.245609        | 221.126443       | 440.261593         | 220.6344         |
| 14 | <b>1486.778787</b> | 743.893032        | 1469.752238        | 735.379757       | 1468.768222        | 734.887749       | P    | <b>359.203744</b>  | 180.105510        | <b>342.177195</b> | 171.592236       | <b>341.193179</b>  | 171.1002         |
| 15 | <b>1573.810815</b> | 787.409046        | 1556.784266        | 778.895771       | 1555.800250        | 778.403763       | S    | 262.150980         | 131.579128        | 245.124431        | 123.065854       | 244.140415         | 122.5738         |
| 16 |                    |                   |                    |                  |                    |                  | R    | 175.118952         | 88.063114         | 158.092403        | 79.549839        |                    |                  |

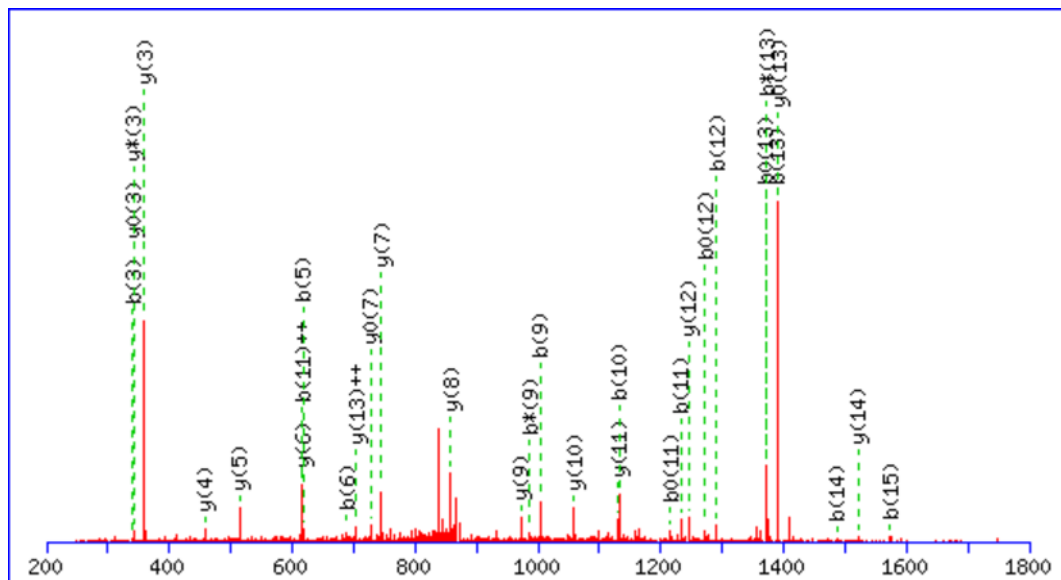

## Peptide View

MS/MS Fragmentation of **TATFAISILQQIELDLK**

Found in **IPI00025491**, Tax\_Id=9606 Gene\_Symbol=EIF4A1;SNORA67 Eukaryotic initiation factor 4A-I

**Experiment:** 31 - OPA-1 **Fraction:** OPA-1

Match to Query 13334: 1903.068048 from(952.541300,2+)

Title: OECHL100310\_05.21831.21831.2.dta

Data file \\BOROMIR\Masse\Data LTQ-Orbitrap\Chrystelle Lacroix\Etude clinique sJPU\OECHL100310\_05.raw

**Monoisotopic mass of neutral peptide Mr(calc):** 1903.066605 **Fixed modifications:** Carbamidomethyl (C) (apply to specified residues or termini only) **Ions**

**Score:** 54 **Expect:** 0.0001 **Matches :** 30/170 fragment ions using 78 most intense peaks ([help](#))

| # | b          | b <sup>++</sup> | b* | b <sup>*++</sup> | b <sup>0</sup>    | b <sup>0++</sup> | Seq. | y                  | y <sup>++</sup> | y*          | y <sup>*++</sup> | y <sup>0</sup> | y <sup>0++</sup> |
|---|------------|-----------------|----|------------------|-------------------|------------------|------|--------------------|-----------------|-------------|------------------|----------------|------------------|
| 1 | 102.054955 | 51.531116       |    |                  | 84.044390         | 42.525833        | T    |                    |                 |             |                  |                |                  |
| 2 | 173.092069 | 87.049672       |    |                  | 155.081504        | 78.044390        | A    | 1803.026229        | 902.016752      | 1785.999680 | 893.503478       | 1785.015664    | 893.0114         |
| 3 | 274.139748 | 137.573512      |    |                  | 256.129183        | 128.568230       | T    | <b>1731.989115</b> | 866.498195      | 1714.962566 | 857.984921       | 1713.978550    | 857.4929         |
| 4 | 421.208162 | 211.107719      |    |                  | 403.197597        | 202.102436       | F    | <b>1630.941436</b> | 815.974356      | 1613.914887 | 807.461081       | 1612.930871    | 806.9690         |
| 5 | 492.245276 | 246.626276      |    |                  | <b>474.234711</b> | 237.620993       | A    | 1483.873022        | 742.440149      | 1466.846473 | 733.926875       | 1465.862457    | 733.4348         |

|    |                    |            |                    |            |                   |            |   |                    |            |                   |            |                   |          |
|----|--------------------|------------|--------------------|------------|-------------------|------------|---|--------------------|------------|-------------------|------------|-------------------|----------|
| 6  | <b>605.329340</b>  | 303.168308 |                    |            | <b>587.318775</b> | 294.163026 | I | <b>1412.835908</b> | 706.921592 | 1395.809359       | 698.408317 | 1394.825343       | 697.9163 |
| 7  | 692.361368         | 346.684322 |                    |            | <b>674.350803</b> | 337.679039 | S | <b>1299.751844</b> | 650.379560 | 1282.725295       | 641.866286 | 1281.741279       | 641.3742 |
| 8  | 805.445432         | 403.226354 |                    |            | <b>787.434867</b> | 394.221071 | I | <b>1212.719816</b> | 606.863546 | 1195.693267       | 598.350272 | 1194.709251       | 597.8582 |
| 9  | <b>918.529496</b>  | 459.768386 |                    |            | <b>900.518931</b> | 450.763104 | L | <b>1099.635752</b> | 550.321514 | 1082.609203       | 541.808240 | 1081.625187       | 541.3162 |
| 10 | 1046.588074        | 523.797675 | 1029.561525        | 515.284401 | 1028.577509       | 514.792393 | Q | <b>986.551688</b>  | 493.779482 | 969.525139        | 485.266207 | 968.541123        | 484.7741 |
| 11 | <b>1174.646652</b> | 587.826964 | 1157.620103        | 579.313690 | 1156.636087       | 578.821682 | Q | <b>858.493110</b>  | 429.750193 | 841.466561        | 421.236918 | <b>840.482545</b> | 420.7449 |
| 12 | <b>1287.730716</b> | 644.368996 | 1270.704167        | 635.855722 | 1269.720151       | 635.363714 | I | <b>730.434532</b>  | 365.720904 | 713.407983        | 357.207629 | 712.423967        | 356.7156 |
| 13 | <b>1416.773309</b> | 708.890292 | <b>1399.746760</b> | 700.377018 | 1398.762744       | 699.885010 | E | <b>617.350468</b>  | 309.178872 | 600.323919        | 300.665597 | 599.339903        | 300.1735 |
| 14 | <b>1529.857373</b> | 765.432324 | <b>1512.830824</b> | 756.919050 | 1511.846808       | 756.427042 | L | <b>488.307875</b>  | 244.657575 | 471.281326        | 236.144301 | 470.297310        | 235.6522 |
| 15 | <b>1644.884316</b> | 822.945796 | 1627.857767        | 814.432522 | 1626.873751       | 813.940513 | D | <b>375.223811</b>  | 188.115543 | <b>358.197262</b> | 179.602269 | 357.213246        | 179.1102 |
| 16 | <b>1757.968380</b> | 879.487828 | <b>1740.941831</b> | 870.974553 | 1739.957815       | 870.482545 | L | 260.196868         | 130.602072 | 243.170319        | 122.088797 |                   |          |
| 17 |                    |            |                    |            |                   |            | K | 147.112804         | 74.060040  | 130.086255        | 65.546765  |                   |          |

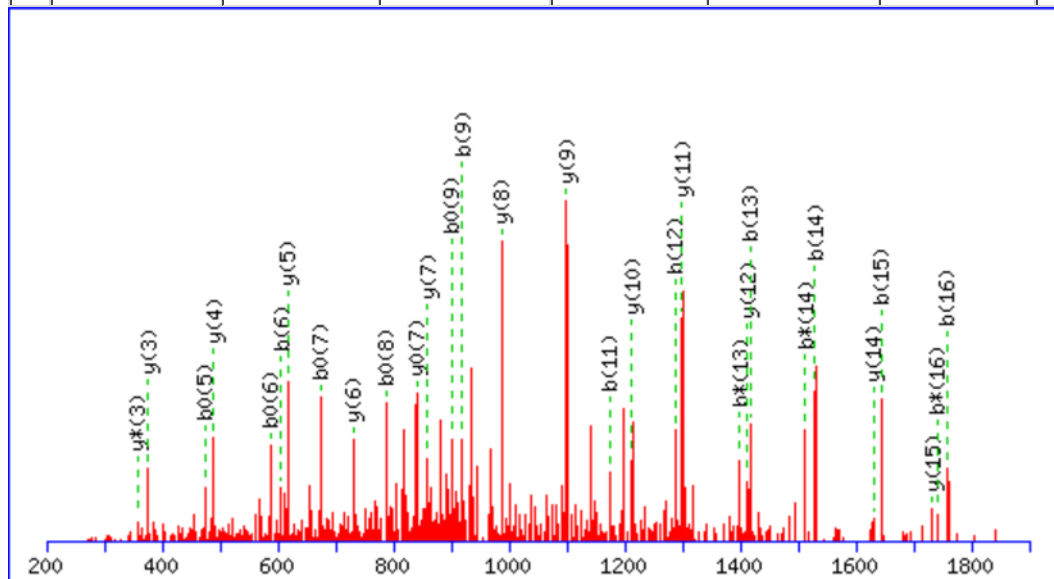

## Peptide View

MS/MS Fragmentation of **YSGSEGSTQTLTKGELK**

Found in **IPI00017526**, Tax\_Id=9606 Gene\_Symbol=S100P Protein S100-P

**Experiment:** 31 - OPA-1 **Fraction:** OPA-1

Match to Query 12436: 1784.879648 from(893.447100,2+)

Title: OECHL100310\_05.7496.7496.2.dta

Data file \\BOROMIR\Masse\Data LTQ-Orbitrap\Chrystelle Lacroix\Etude clinique sJPU\OECHL100310\_05.raw

**Monoisotopic mass of neutral peptide Mr(calc):** 1784.879211**Fixed modifications:** Carbamidomethyl (C) (apply to specified residues or termini only)**Ions**

**Score:** 62 **Expect:** 9.2e-005**Matches :** 36/170 fragment ions using 74 most intense peaks ([help](#))

| #  | b                  | b <sup>++</sup> | b*                 | b* <sup>++</sup>  | b <sup>0</sup>     | b <sup>0++</sup>  | Seq. | y                  | y <sup>++</sup>   | y*                 | y* <sup>++</sup>  | y <sup>0</sup>     | y <sup>0++</sup> |
|----|--------------------|-----------------|--------------------|-------------------|--------------------|-------------------|------|--------------------|-------------------|--------------------|-------------------|--------------------|------------------|
| 1  | 164.070605         | 82.538940       |                    |                   |                    |                   | Y    |                    |                   |                    |                   |                    |                  |
| 2  | 251.102633         | 126.054954      |                    |                   | 233.092068         | 117.049672        | S    | <b>1622.823172</b> | <b>811.915224</b> | 1605.796623        | <b>803.401950</b> | 1604.812607        | <b>802.9099</b>  |
| 3  | 308.124097         | 154.565687      |                    |                   | 290.113532         | 145.560404        | G    | <b>1535.791144</b> | <b>768.399210</b> | 1518.764595        | 759.885936        | 1517.780579        | 759.3939         |
| 4  | 395.156125         | 198.081701      |                    |                   | 377.145560         | 189.076418        | S    | 1478.769680        | <b>739.888478</b> | 1461.743131        | 731.375204        | 1460.759115        | 730.8831         |
| 5  | 524.198718         | 262.602997      |                    |                   | <b>506.188153</b>  | 253.597715        | E    | <b>1391.737652</b> | <b>696.372464</b> | 1374.711103        | 687.859190        | <b>1373.727087</b> | 687.3671         |
| 6  | 581.220182         | 291.113729      |                    |                   | 563.209617         | 282.108447        | G    | <b>1262.695059</b> | <b>631.851167</b> | 1245.668510        | 623.337893        | <b>1244.684494</b> | 622.8458         |
| 7  | 668.252210         | 334.629743      |                    |                   | 650.241645         | 325.624461        | S    | <b>1205.673595</b> | 603.340436        | 1188.647046        | 594.827161        | 1187.663030        | 594.3351         |
| 8  | 769.299889         | 385.153583      |                    |                   | 751.289324         | 376.148300        | T    | <b>1118.641567</b> | 559.824421        | 1101.615018        | 551.311147        | 1100.631002        | 550.8191         |
| 9  | 897.358467         | 449.182872      | 880.331918         | 440.669597        | 879.347902         | 440.177589        | Q    | <b>1017.593888</b> | 509.300582        | <b>1000.567339</b> | 500.787307        | 999.583323         | 500.2952         |
| 10 | 998.406146         | 499.706711      | 981.379597         | 491.193437        | 980.395581         | 490.701429        | T    | 889.535310         | 445.271293        | 872.508761         | 436.758018        | <b>871.524745</b>  | 436.2660         |
| 11 | 1111.490210        | 556.248743      | 1094.463661        | 547.735469        | 1093.479645        | 547.243461        | L    | <b>788.487631</b>  | 394.747453        | 771.461082         | 386.234179        | 770.477066         | 385.7421         |
| 12 | 1212.537889        | 606.772583      | 1195.511340        | 598.259308        | <b>1194.527324</b> | 597.767300        | T    | <b>675.403567</b>  | 338.205421        | 658.377018         | 329.692147        | 657.393002         | 329.2001         |
| 13 | <b>1340.632852</b> | 670.820064      | 1323.606303        | 662.306790        | 1322.622287        | 661.814782        | K    | <b>574.355888</b>  | 287.681582        | 557.329339         | 279.168307        | 556.345323         | 278.6762         |
| 14 | <b>1397.654316</b> | 699.330796      | 1380.627767        | 690.817522        | 1379.643751        | 690.325514        | G    | <b>446.260925</b>  | 223.634100        | 429.234376         | 215.120826        | 428.250360         | 214.6288         |
| 15 | <b>1526.696909</b> | 763.852093      | <b>1509.670360</b> | 755.338818        | <b>1508.686344</b> | 754.846810        | E    | 389.239461         | 195.123368        | 372.212912         | 186.610094        | <b>371.228896</b>  | 186.1180         |
| 16 | <b>1639.780973</b> | 820.394124      | <b>1622.754424</b> | <b>811.880850</b> | <b>1621.770408</b> | <b>811.388842</b> | L    | <b>260.196868</b>  | 130.602072        | 243.170319         | 122.088797        |                    |                  |
| 17 |                    |                 |                    |                   |                    |                   | K    | 147.112804         | 74.060040         | 130.086255         | 65.546765         |                    |                  |

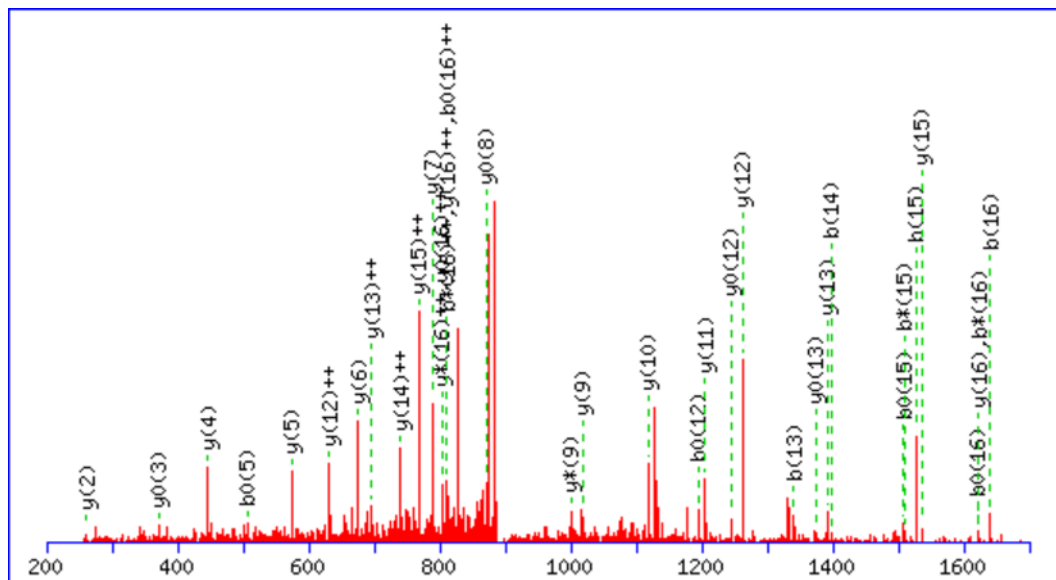

## Peptide View

MS/MS Fragmentation of **SDAAVDTSSSEITTK**

Found in **IPI00412977**, Tax\_Id=9606 Gene\_Symbol=- Prothymosin alpha

**Experiment:** 31 - OPA-1 **Fraction:** OPA-1

Match to Query 9262: 1465.679248 from(733.846900,2+)

Title: OECHL100310\_05.9549.9549.2.dta

Data file \\BOROMIR\Masse\Data LTQ-Orbitrap\Chrystelle Lacroix\Etude clinique sJPU\OECHL100310\_05.raw

**Monoisotopic mass of neutral peptide Mr(calc):** 1465.678391 **Fixed modifications:** Carbamidomethyl (C) (apply to specified residues or termini only) **Variable**

**modifications:** N-term : Acetyl (N-term) **Ions Score:** 60 **Expect:** 7.7e-005 **Matches :** 26/128 fragment ions using 48 most intense peaks ([help](#))

| # | b          | b <sup>++</sup> | b <sup>0</sup> | b <sup>0++</sup> | Seq. | y           | y <sup>++</sup> | y <sup>*</sup> | y <sup>*++</sup> | y <sup>0</sup> | y <sup>0++</sup> | #  |
|---|------------|-----------------|----------------|------------------|------|-------------|-----------------|----------------|------------------|----------------|------------------|----|
| 1 | 130.049869 | 65.528572       | 112.039304     | 56.523290        | S    |             |                 |                |                  |                |                  | 14 |
| 2 | 245.076812 | 123.042044      | 227.066247     | 114.036761       | D    | 1337.643082 | 669.325179      | 1320.616533    | 660.811905       | 1319.632517    | 660.319897       | 13 |
| 3 | 316.113926 | 158.560601      | 298.103361     | 149.555319       | A    | 1222.616139 | 611.811708      | 1205.589590    | 603.298433       | 1204.605574    | 602.806425       | 12 |
| 4 | 387.151040 | 194.079158      | 369.140475     | 185.073875       | A    | 1151.579025 | 576.293151      | 1134.552476    | 567.779876       | 1133.568460    | 567.287868       | 11 |
| 5 | 486.219454 | 243.613365      | 468.208889     | 234.608082       | V    | 1080.541911 | 540.774594      | 1063.515362    | 532.261319       | 1062.531346    | 531.769311       | 10 |

|    |             |            |             |            |   |            |            |            |            |            |            |   |
|----|-------------|------------|-------------|------------|---|------------|------------|------------|------------|------------|------------|---|
| 6  | 601.246397  | 301.126837 | 583.235832  | 292.121554 | D | 981.473497 | 491.240387 | 964.446948 | 482.727112 | 963.462932 | 482.235104 | 9 |
| 7  | 702.294076  | 351.650676 | 684.283511  | 342.645394 | T | 866.446554 | 433.726915 | 849.420005 | 425.213641 | 848.435989 | 424.721633 | 8 |
| 8  | 789.326104  | 395.166690 | 771.315539  | 386.161408 | S | 765.398875 | 383.203076 | 748.372326 | 374.689801 | 747.388310 | 374.197793 | 7 |
| 9  | 876.358132  | 438.682704 | 858.347567  | 429.677421 | S | 678.366847 | 339.687062 | 661.340298 | 331.173787 | 660.356282 | 330.681779 | 6 |
| 10 | 1005.400725 | 503.204001 | 987.390160  | 494.198718 | E | 591.334819 | 296.171048 | 574.308270 | 287.657773 | 573.324254 | 287.165765 | 5 |
| 11 | 1118.484789 | 559.746033 | 1100.474224 | 550.740750 | I | 462.292226 | 231.649751 | 445.265677 | 223.136477 | 444.281661 | 222.644469 | 4 |
| 12 | 1219.532468 | 610.269872 | 1201.521903 | 601.264590 | T | 349.208162 | 175.107719 | 332.181613 | 166.594445 | 331.197597 | 166.102437 | 3 |
| 13 | 1320.580147 | 660.793712 | 1302.569582 | 651.788429 | T | 248.160483 | 124.583879 | 231.133934 | 116.070605 | 230.149918 | 115.578597 | 2 |
| 14 |             |            |             |            | K | 147.112804 | 74.060040  | 130.086255 | 65.546765  |            |            | 1 |

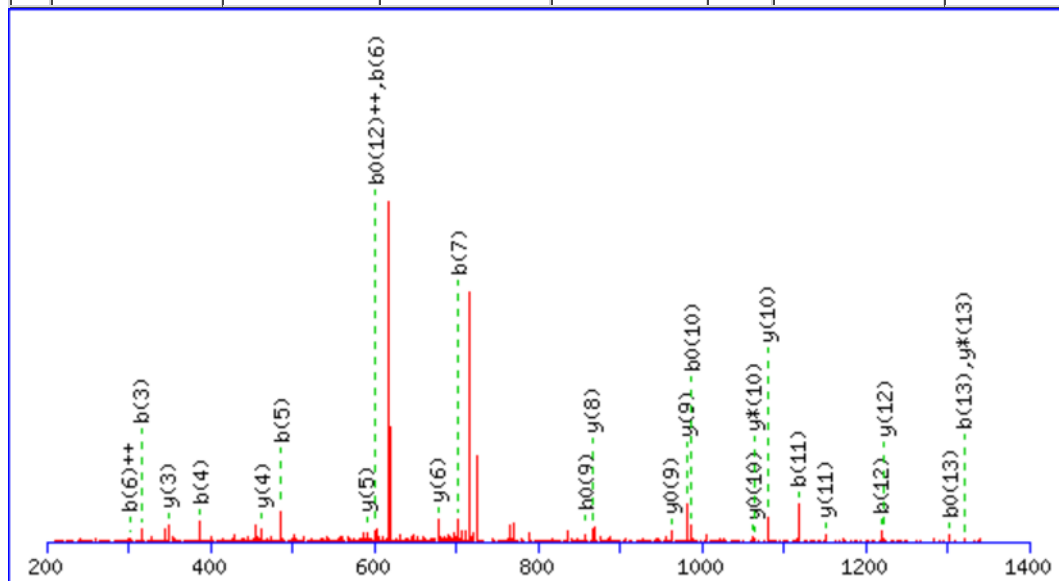

## Peptide View

MS/MS Fragmentation of **AFSMDEHNAALR**

Found in **IPI00008239**, Tax\_Id=9606 Gene\_Symbol=GPRC5B cDNA FLJ55176, highly similar to G-protein coupled receptor family C group 5 member B

**Experiment:** 31 - OPA-1 **Fraction:** OPA-1

Match to Query 8248: 1360.619048 from(681.316800,2+)

Title: OECHL100310\_05.9380.9380.2.dta

Data file \\BOROMIR\Masse\Data LTQ-Orbitrap\Chrystelle Lacroix\Etude clinique sJPU\OECHL100310\_05.raw

**Monoisotopic mass of neutral peptide Mr(calc):** 1360.619354**Fixed modifications:** Carbamidomethyl (C) (apply to specified residues or termini only)**Ions****Score:** 59 **Expect:** 8.1e-005**Matches :** 16/102 fragment ions using 23 most intense peaks ([help](#))

| #  | b                  | b <sup>++</sup> | b <sup>*</sup> | b <sup>*++</sup> | b <sup>0</sup>     | b <sup>0++</sup> | Seq. | y                  | y <sup>++</sup>   | y <sup>*</sup> | y <sup>*++</sup> | y <sup>0</sup> | y <sup>0++</sup> |
|----|--------------------|-----------------|----------------|------------------|--------------------|------------------|------|--------------------|-------------------|----------------|------------------|----------------|------------------|
| 1  | 72.044390          | 36.525833       |                |                  |                    |                  | A    |                    |                   |                |                  |                |                  |
| 2  | 219.112804         | 110.060040      |                |                  |                    |                  | F    | 1290.589546        | 645.798411        | 1273.562997    | 637.285137       | 1272.578981    | 636.7931         |
| 3  | <b>306.144832</b>  | 153.576054      |                |                  | <b>288.134267</b>  | 144.570772       | S    | <b>1143.521132</b> | <b>572.264204</b> | 1126.494583    | 563.750929       | 1125.510567    | 563.2589         |
| 4  | 437.185317         | 219.096296      |                |                  | 419.174752         | 210.091014       | M    | <b>1056.489104</b> | 528.748190        | 1039.462555    | 520.234916       | 1038.478539    | 519.7429         |
| 5  | 552.212260         | 276.609768      |                |                  | 534.201695         | 267.604486       | D    | <b>925.448619</b>  | <b>463.227947</b> | 908.422070     | 454.714673       | 907.438054     | 454.2226         |
| 6  | 681.254853         | 341.131065      |                |                  | <b>663.244288</b>  | 332.125782       | E    | <b>810.421676</b>  | 405.714476        | 793.395127     | 397.201201       | 792.411111     | 396.7091         |
| 7  | 818.313765         | 409.660521      |                |                  | 800.303200         | 400.655238       | H    | 681.379083         | 341.193179        | 664.352534     | 332.679905       |                |                  |
| 8  | 932.356692         | 466.681984      | 915.330143     | 458.168709       | 914.346127         | 457.676701       | N    | <b>544.320171</b>  | 272.663724        | 527.293622     | 264.150449       |                |                  |
| 9  | <b>1003.393806</b> | 502.200541      | 986.367257     | 493.687266       | 985.383241         | 493.195258       | A    | <b>430.277244</b>  | 215.642260        | 413.250695     | 207.128985       |                |                  |
| 10 | 1074.430920        | 537.719098      | 1057.404371    | 529.205824       | <b>1056.420355</b> | 528.713816       | A    | <b>359.240130</b>  | 180.123703        | 342.213581     | 171.610428       |                |                  |
| 11 | <b>1187.514984</b> | 594.261130      | 1170.488435    | 585.747856       | 1169.504419        | 585.255847       | L    | <b>288.203016</b>  | 144.605146        | 271.176467     | 136.091871       |                |                  |
| 12 |                    |                 |                |                  |                    |                  | R    | 175.118952         | 88.063114         | 158.092403     | 79.549839        |                |                  |

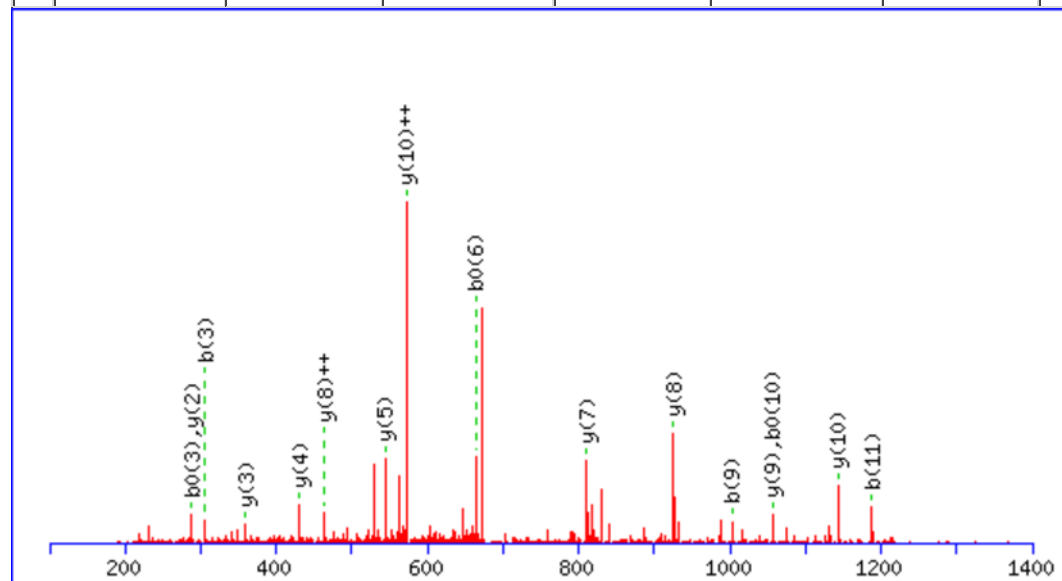



## Peptide View

MS/MS Fragmentation of **AADDTWEPFASGK**

Found in **IPI00022432**, Tax\_Id=9606 Gene\_Symbol=TTR Transthyretin

**Experiment:** 16 - NOPA1 **Fraction:** NOPA1

Match to Query 8673: 1393.615048 from(697.814800,2+)

Title: OECHL100310\_03.15117.15117.2.dta

Data file \\BOROMIR\Masse\Data LTQ-Orbitrap\Chrystelle Lacroix\Etude clinique sJPU\OECHL100310\_03.raw

**Monoisotopic mass of neutral peptide Mr(calc):** 1393.615005 **Fixed modifications:** Carbamidomethyl (C) (apply to specified residues or termini only) **Ions**

**Score:** 77 **Expect:** 1.2e-006 **Matches :** 21/112 fragment ions using 35 most intense peaks ([help](#))

| #  | b                  | b <sup>++</sup> | b <sup>0</sup>    | b <sup>0++</sup> | Seq. | y                  | y <sup>++</sup> | y*          | y* <sup>++</sup> | y <sup>0</sup>    | y <sup>0++</sup> | #  |
|----|--------------------|-----------------|-------------------|------------------|------|--------------------|-----------------|-------------|------------------|-------------------|------------------|----|
| 1  | 72.044390          | 36.525833       |                   |                  | A    |                    |                 |             |                  |                   |                  | 13 |
| 2  | 143.081504         | 72.044390       |                   |                  | A    | 1323.585173        | 662.296225      | 1306.558624 | 653.782950       | 1305.574608       | 653.290942       | 12 |
| 3  | <b>258.108447</b>  | 129.557862      | 240.097882        | 120.552579       | D    | <b>1252.548059</b> | 626.777668      | 1235.521510 | 618.264393       | 1234.537494       | 617.772385       | 11 |
| 4  | <b>373.135390</b>  | 187.071333      | 355.124825        | 178.066051       | D    | <b>1137.521116</b> | 569.264196      | 1120.494567 | 560.750922       | 1119.510551       | 560.258914       | 10 |
| 5  | <b>474.183069</b>  | 237.595173      | <b>456.172504</b> | 228.589890       | T    | <b>1022.494173</b> | 511.750725      | 1005.467624 | 503.237450       | 1004.483608       | 502.745442       | 9  |
| 6  | <b>660.262382</b>  | 330.634829      | 642.251817        | 321.629547       | W    | <b>921.446494</b>  | 461.226885      | 904.419945  | 452.713611       | 903.435929        | 452.221603       | 8  |
| 7  | <b>789.304975</b>  | 395.156126      | 771.294410        | 386.150843       | E    | <b>735.367181</b>  | 368.187229      | 718.340632  | 359.673954       | 717.356616        | 359.181946       | 7  |
| 8  | 886.357739         | 443.682508      | 868.347174        | 434.677225       | P    | <b>606.324588</b>  | 303.665932      | 589.298039  | 295.152658       | <b>588.314023</b> | 294.660650       | 6  |
| 9  | <b>1033.426153</b> | 517.216715      | 1015.415588       | 508.211432       | F    | <b>509.271824</b>  | 255.139550      | 492.245275  | 246.626275       | 491.261259        | 246.134267       | 5  |
| 10 | <b>1104.463267</b> | 552.735272      | 1086.452702       | 543.729989       | A    | <b>362.203410</b>  | 181.605343      | 345.176861  | 173.092068       | 344.192845        | 172.600060       | 4  |
| 11 | <b>1191.495295</b> | 596.251286      | 1173.484730       | 587.246003       | S    | <b>291.166296</b>  | 146.086786      | 274.139747  | 137.573512       | 273.155731        | 137.081504       | 3  |
| 12 | <b>1248.516759</b> | 624.762018      | 1230.506194       | 615.756735       | G    | <b>204.134268</b>  | 102.570772      | 187.107719  | 94.057497        |                   |                  | 2  |
| 13 |                    |                 |                   |                  | K    | 147.112804         | 74.060040       | 130.086255  | 65.546765        |                   |                  | 1  |

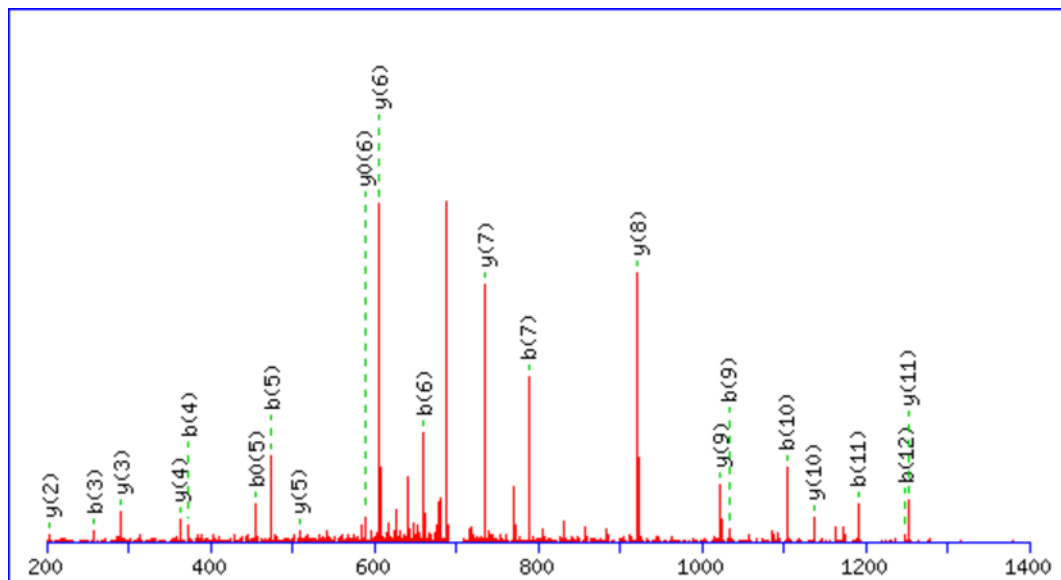

## Peptide View

MS/MS Fragmentation of **SDAAVDTSSSEITTK**

Found in **IPI00412977**, Tax\_Id=9606 Gene\_Symbol=- Prothymosin alpha

**Experiment:** 16 - NOPA1 **Fraction:** NOPA1

Match to Query 9428: 1465.678448 from(733.846500,2+)

Title: OECHL100310\_03.9986.9986.2.dta

Data file \\BOROMIR\Masse\Data LTQ-Orbitrap\Chrystelle Lacroix\Etude clinique sJPU\OECHL100310\_03.raw

**Monoisotopic mass of neutral peptide Mr(calc):** 1465.678391 **Fixed modifications:** Carbamidomethyl (C) (apply to specified residues or termini only) **Variable**

**modifications:** N-term : Acetyl (N-term) **Ions Score:** 73 **Expect:** 3.8e-006 **Matches :** 27/128 fragment ions using 37 most intense peaks ([help](#))

| # | b          | b <sup>++</sup> | b <sup>0</sup> | b <sup>0++</sup> | Seq. | y           | y <sup>++</sup> | y <sup>*</sup> | y <sup>*++</sup> | y <sup>0</sup> | y <sup>0++</sup> | #  |
|---|------------|-----------------|----------------|------------------|------|-------------|-----------------|----------------|------------------|----------------|------------------|----|
| 1 | 130.049869 | 65.528572       | 112.039304     | 56.523290        | S    |             |                 |                |                  |                |                  | 14 |
| 2 | 245.076812 | 123.042044      | 227.066247     | 114.036761       | D    | 1337.643082 | 669.325179      | 1320.616533    | 660.811905       | 1319.632517    | 660.319897       | 13 |
| 3 | 316.113926 | 158.560601      | 298.103361     | 149.555319       | A    | 1222.616139 | 611.811708      | 1205.589590    | 603.298433       | 1204.605574    | 602.806425       | 12 |
| 4 | 387.151040 | 194.079158      | 369.140475     | 185.073875       | A    | 1151.579025 | 576.293151      | 1134.552476    | 567.779876       | 1133.568460    | 567.287868       | 11 |
| 5 | 486.219454 | 243.613365      | 468.208889     | 234.608082       | V    | 1080.541911 | 540.774594      | 1063.515362    | 532.261319       | 1062.531346    | 531.769311       | 10 |

|    |             |            |             |            |   |            |            |            |            |            |            |   |
|----|-------------|------------|-------------|------------|---|------------|------------|------------|------------|------------|------------|---|
| 6  | 601.246397  | 301.126837 | 583.235832  | 292.121554 | D | 981.473497 | 491.240387 | 964.446948 | 482.727112 | 963.462932 | 482.235104 | 9 |
| 7  | 702.294076  | 351.650676 | 684.283511  | 342.645394 | T | 866.446554 | 433.726915 | 849.420005 | 425.213641 | 848.435989 | 424.721633 | 8 |
| 8  | 789.326104  | 395.166690 | 771.315539  | 386.161408 | S | 765.398875 | 383.203076 | 748.372326 | 374.689801 | 747.388310 | 374.197793 | 7 |
| 9  | 876.358132  | 438.682704 | 858.347567  | 429.677421 | S | 678.366847 | 339.687062 | 661.340298 | 331.173787 | 660.356282 | 330.681779 | 6 |
| 10 | 1005.400725 | 503.204001 | 987.390160  | 494.198718 | E | 591.334819 | 296.171048 | 574.308270 | 287.657773 | 573.324254 | 287.165765 | 5 |
| 11 | 1118.484789 | 559.746033 | 1100.474224 | 550.740750 | I | 462.292226 | 231.649751 | 445.265677 | 223.136477 | 444.281661 | 222.644469 | 4 |
| 12 | 1219.532468 | 610.269872 | 1201.521903 | 601.264590 | T | 349.208162 | 175.107719 | 332.181613 | 166.594445 | 331.197597 | 166.102437 | 3 |
| 13 | 1320.580147 | 660.793712 | 1302.569582 | 651.788429 | T | 248.160483 | 124.583879 | 231.133934 | 116.070605 | 230.149918 | 115.578597 | 2 |
| 14 |             |            |             |            | K | 147.112804 | 74.060040  | 130.086255 | 65.546765  |            |            | 1 |

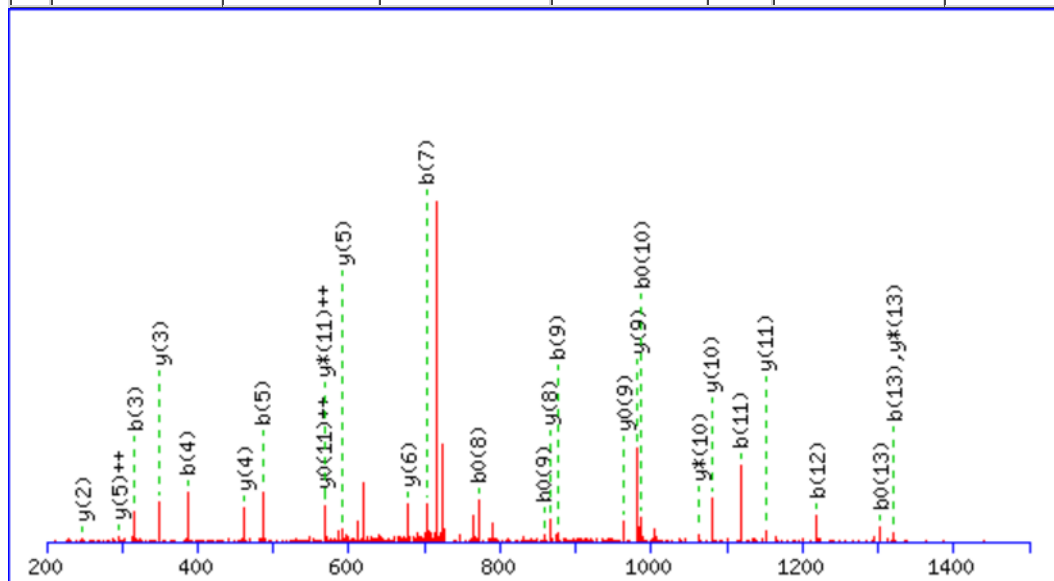

## Peptide View

MS/MS Fragmentation of **LLQDSVDFSLADAINTEFK**

Found in **IPI00418471**, Tax\_Id=9606 Gene\_Symbol=VIM Vimentin

Experiment: 16 - NOPA1 Fraction: NOPA1

Match to Query 14687: 2125.057448 from(1063.536000,2+)

Title: OECHL100310\_03.20847.20847.2.dta

Data file \\BOROMIR\Masse\Data LTQ-Orbitrap\Chrystelle Lacroix\Etude clinique sJPU\OECHL100310\_03.raw

**Monoisotopic mass of neutral peptide Mr(calc): 2125.057907**Fixed modifications: Carbamidomethyl (C) (apply to specified residues or termini only)**Ions****Score: 114 Expect: 7.2e-010**Matches : 17/202 fragment ions using 18 most intense peaks ([help](#))

| #  | b                  | b <sup>++</sup> | b*                 | b <sup>*++</sup> | b <sup>0</sup>    | b <sup>0++</sup> | Seq. | y                  | y <sup>++</sup> | y*          | y <sup>*++</sup> | y <sup>0</sup> | y <sup>0++</sup> |
|----|--------------------|-----------------|--------------------|------------------|-------------------|------------------|------|--------------------|-----------------|-------------|------------------|----------------|------------------|
| 1  | 114.091340         | 57.549308       |                    |                  |                   |                  | L    |                    |                 |             |                  |                |                  |
| 2  | 227.175404         | 114.091340      |                    |                  |                   |                  | L    | 2012.981128        | 1006.994202     | 1995.954579 | 998.480928       | 1994.970563    | 997.988          |
| 3  | <b>355.233982</b>  | 178.120629      | 338.207433         | 169.607355       |                   |                  | Q    | 1899.897064        | 950.452170      | 1882.870515 | 941.938896       | 1881.886499    | 941.446          |
| 4  | 470.260925         | 235.634101      | 453.234376         | 227.120826       | 452.250360        | 226.628818       | D    | 1771.838486        | 886.422881      | 1754.811937 | 877.909607       | 1753.827921    | 877.417          |
| 5  | 557.292953         | 279.150115      | 540.266404         | 270.636840       | 539.282388        | 270.144832       | S    | <b>1656.811543</b> | 828.909410      | 1639.784994 | 820.396135       | 1638.800978    | 819.904          |
| 6  | 656.361367         | 328.684322      | 639.334818         | 320.171047       | <b>638.350802</b> | 319.679039       | V    | <b>1569.779515</b> | 785.393396      | 1552.752966 | 776.880121       | 1551.768950    | 776.388          |
| 7  | 771.388310         | 386.197793      | 754.361761         | 377.684519       | 753.377745        | 377.192511       | D    | 1470.711101        | 735.859189      | 1453.684552 | 727.345914       | 1452.700536    | 726.853          |
| 8  | 918.456724         | 459.732000      | 901.430175         | 451.218726       | 900.446159        | 450.726718       | F    | <b>1355.684158</b> | 678.345717      | 1338.657609 | 669.832443       | 1337.673593    | 669.340          |
| 9  | 1005.488752        | 503.248014      | 988.462203         | 494.734739       | 987.478187        | 494.242731       | S    | <b>1208.615744</b> | 604.811510      | 1191.589195 | 596.298236       | 1190.605179    | 595.806          |
| 10 | 1118.572816        | 559.790046      | 1101.546267        | 551.276772       | 1100.562251       | 550.784763       | L    | <b>1121.583716</b> | 561.295496      | 1104.557167 | 552.782222       | 1103.573151    | 552.290          |
| 11 | 1189.609930        | 595.308603      | 1172.583381        | 586.795328       | 1171.599365       | 586.303320       | A    | <b>1008.499652</b> | 504.753464      | 991.473103  | 496.240190       | 990.489087     | 495.748          |
| 12 | 1304.636873        | 652.822074      | 1287.610324        | 644.308800       | 1286.626308       | 643.816792       | D    | <b>937.462538</b>  | 469.234907      | 920.435989  | 460.721633       | 919.451973     | 460.229          |
| 13 | 1375.673987        | 688.340631      | 1358.647438        | 679.827357       | 1357.663422       | 679.335349       | A    | <b>822.435595</b>  | 411.721436      | 805.409046  | 403.208161       | 804.425030     | 402.716          |
| 14 | 1488.758051        | 744.882663      | <b>1471.731502</b> | 736.369389       | 1470.747486       | 735.877381       | I    | <b>751.398481</b>  | 376.202879      | 734.371932  | 367.689604       | 733.387916     | 367.197          |
| 15 | 1602.800978        | 801.904127      | 1585.774429        | 793.390852       | 1584.790413       | 792.898844       | N    | <b>638.314417</b>  | 319.660847      | 621.287868  | 311.147572       | 620.303852     | 310.655          |
| 16 | <b>1703.848657</b> | 852.427966      | 1686.822108        | 843.914692       | 1685.838092       | 843.422684       | T    | <b>524.271490</b>  | 262.639383      | 507.244941  | 254.126109       | 506.260925     | 253.634          |
| 17 | <b>1832.891250</b> | 916.949263      | 1815.864701        | 908.435989       | 1814.880685       | 907.943980       | E    | <b>423.223811</b>  | 212.115544      | 406.197262  | 203.602269       | 405.213246     | 203.110          |
| 18 | 1979.959664        | 990.483470      | 1962.933115        | 981.970196       | 1961.949099       | 981.478187       | F    | 294.181218         | 147.594247      | 277.154669  | 139.080973       |                |                  |
| 19 |                    |                 |                    |                  |                   |                  | K    | 147.112804         | 74.060040       | 130.086255  | 65.546766        |                |                  |

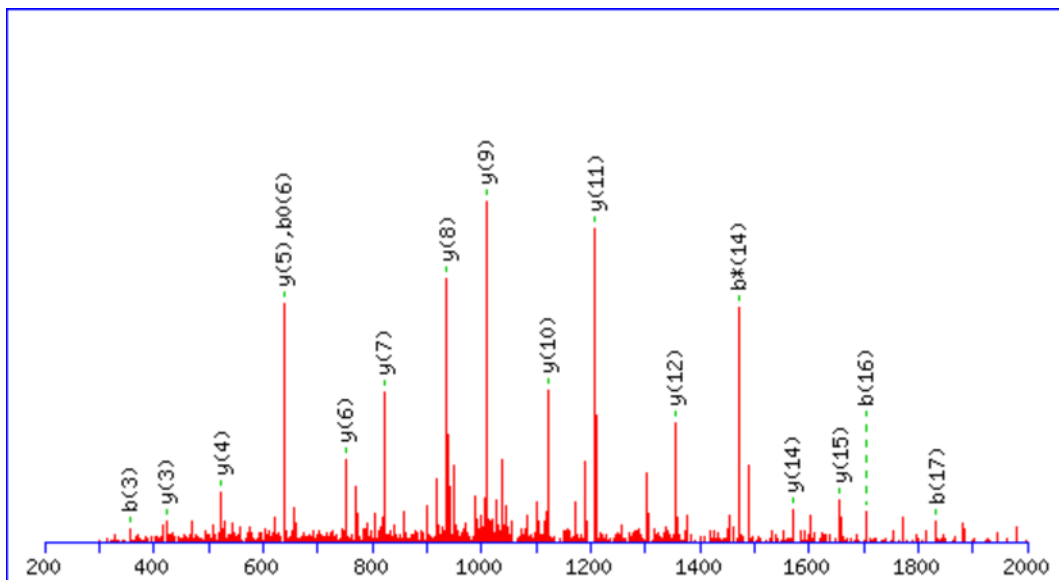

## Peptide View

MS/MS Fragmentation of **QLGPQPQDIYYEDGVVPTDRR**

Found in **IPI00015199**, Tax\_Id=9606 Gene\_Symbol=CD7 T-cell antigen CD7

**Experiment:** 16 - NOPA1 **Fraction:** NOPA1

Match to Query 16799: 2659.328472 from(887.450100,3+)

Title: OECHL100310\_03.17368.17368.3.dta

Data file \\BOROMIR\Masse\Data LTQ-Orbitrap\Chrystelle Lacroix\Etude clinique sJPU\OECHL100310\_03.raw

**Monoisotopic mass of neutral peptide Mr(calc):** 2659.324203 **Fixed modifications:** Carbamidomethyl (C) (apply to specified residues or termini only) **Ions**

**Score:** 70 **Expect:** 2e-005 **Matches :** 55/246 fragment ions using 119 most intense peaks ([help](#))

| # | b                 | b <sup>++</sup> | b*                | b <sup>*++</sup> | b <sup>0</sup> | b <sup>0++</sup> | Seq. | y           | y <sup>++</sup> | y*          | y <sup>*++</sup> | y <sup>0</sup> |     |
|---|-------------------|-----------------|-------------------|------------------|----------------|------------------|------|-------------|-----------------|-------------|------------------|----------------|-----|
| 1 | 129.065854        | 65.036565       | 112.039305        | 56.523291        |                |                  | Q    |             |                 |             |                  |                |     |
| 2 | 242.149918        | 121.578597      | 225.123369        | 113.065323       |                |                  | L    | 2532.272897 | 1266.640086     | 2515.246348 | 1258.126812      | 2514.262332    | 12: |
| 3 | <b>299.171382</b> | 150.089329      | 282.144833        | 141.576055       |                |                  | G    | 2419.188833 | 1210.098054     | 2402.162284 | 1201.584780      | 2401.178268    | 12: |
| 4 | <b>396.224146</b> | 198.615711      | 379.197597        | 190.102436       |                |                  | P    | 2362.167369 | 1181.587322     | 2345.140820 | 1173.074048      | 2344.156804    | 11: |
| 5 | 524.282724        | 262.645000      | <b>507.256175</b> | 254.131726       |                |                  | Q    | 2265.114605 | 1133.060940     | 2248.088056 | 1124.547666      | 2247.104040    | 11: |

|    |             |             |             |             |             |             |   |             |             |             |             |             |    |
|----|-------------|-------------|-------------|-------------|-------------|-------------|---|-------------|-------------|-------------|-------------|-------------|----|
| 6  | 621.335488  | 311.171382  | 604.308939  | 302.658108  |             |             | P | 2137.056027 | 1069.031651 | 2120.029478 | 1060.518377 | 2119.045462 | 10 |
| 7  | 749.394066  | 375.200671  | 732.367517  | 366.687397  |             |             | Q | 2040.003263 | 1020.505269 | 2022.976714 | 1011.991995 | 2021.992698 | 10 |
| 8  | 864.421009  | 432.714143  | 847.394460  | 424.200868  | 846.410444  | 423.708860  | D | 1911.944685 | 956.475980  | 1894.918136 | 947.962706  | 1893.934120 | 9  |
| 9  | 977.505073  | 489.256175  | 960.478524  | 480.742900  | 959.494508  | 480.250892  | I | 1796.917742 | 898.962509  | 1779.891193 | 890.449234  | 1778.907177 | 8  |
| 10 | 1090.589137 | 545.798206  | 1073.562588 | 537.284932  | 1072.578572 | 536.792924  | I | 1683.833678 | 842.420477  | 1666.807129 | 833.907202  | 1665.823113 | 8  |
| 11 | 1253.652466 | 627.329871  | 1236.625917 | 618.816597  | 1235.641901 | 618.324589  | Y | 1570.749614 | 785.878445  | 1553.723065 | 777.365170  | 1552.739049 | 7  |
| 12 | 1416.715795 | 708.861536  | 1399.689246 | 700.348261  | 1398.705230 | 699.856253  | Y | 1407.686285 | 704.346780  | 1390.659736 | 695.833506  | 1389.675720 | 6  |
| 13 | 1545.758388 | 773.382832  | 1528.731839 | 764.869558  | 1527.747823 | 764.377549  | E | 1244.622956 | 622.815116  | 1227.596407 | 614.301841  | 1226.612391 | 6  |
| 14 | 1660.785331 | 830.896304  | 1643.758782 | 822.383029  | 1642.774766 | 821.891021  | D | 1115.580363 | 558.293819  | 1098.553814 | 549.780545  | 1097.569798 | 5  |
| 15 | 1717.806795 | 859.407036  | 1700.780246 | 850.893761  | 1699.796230 | 850.401753  | G | 1000.553420 | 500.780348  | 983.526871  | 492.267073  | 982.542855  | 4  |
| 16 | 1816.875209 | 908.941243  | 1799.848660 | 900.427968  | 1798.864644 | 899.935960  | V | 943.531956  | 472.269616  | 926.505407  | 463.756341  | 925.521391  | 4  |
| 17 | 1915.943623 | 958.475450  | 1898.917074 | 949.962175  | 1897.933058 | 949.470167  | V | 844.463542  | 422.735409  | 827.436993  | 414.222134  | 826.452977  | 4  |
| 18 | 2012.996387 | 1007.001832 | 1995.969838 | 998.488557  | 1994.985822 | 997.996549  | P | 745.395128  | 373.201202  | 728.368579  | 364.687927  | 727.384563  | 3  |
| 19 | 2114.044066 | 1057.525671 | 2097.017517 | 1049.012396 | 2096.033501 | 1048.520388 | T | 648.342364  | 324.674820  | 631.315815  | 316.161545  | 630.331799  | 3  |
| 20 | 2215.091745 | 1108.049510 | 2198.065196 | 1099.536236 | 2197.081180 | 1099.044228 | T | 547.294685  | 274.150980  | 530.268136  | 265.637706  | 529.284120  | 2  |
| 21 | 2330.118688 | 1165.562982 | 2313.092139 | 1157.049707 | 2312.108123 | 1156.557699 | D | 446.247006  | 223.627141  | 429.220457  | 215.113866  | 428.236441  | 2  |
| 22 | 2486.219799 | 1243.613537 | 2469.193250 | 1235.100263 | 2468.209234 | 1234.608255 | R | 331.220063  | 166.113669  | 314.193514  | 157.600395  |             |    |
| 23 |             |             |             |             |             |             | R | 175.118952  | 88.063114   | 158.092403  | 79.549839   |             |    |

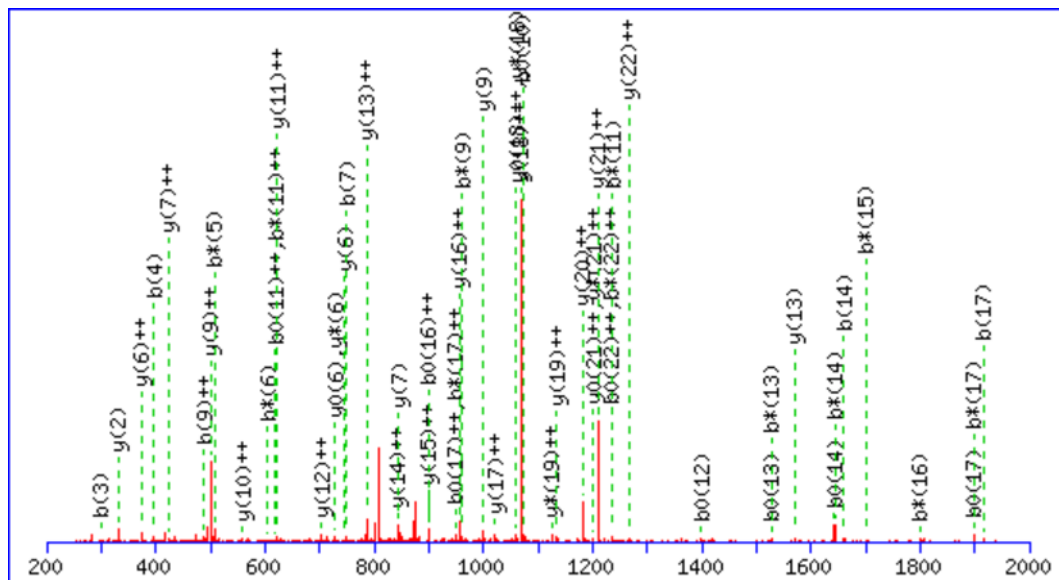

## Peptide View

MS/MS Fragmentation of **YSGSEGSTQTLTKGELK**

Found in **IPI00017526**, Tax\_Id=9606 Gene\_Symbol=S100P Protein S100-P

**Experiment:** 16 - NOPA1 **Fraction:** NOPA1

Match to Query 12652: 1784.880048 from(893.447300,2+)

Title: OECHL100310\_03.7728.7728.2.dta

Data file \\BOROMIR\Masse\Data LTQ-Orbitrap\Chrystelle Lacroix\Etude clinique sJPU\OECHL100310\_03.raw

**Monoisotopic mass of neutral peptide Mr(calc):** 1784.879211 **Fixed modifications:** Carbamidomethyl (C) (apply to specified residues or termini only) **Ions**

**Score:** 80 **Expect:** 1.5e-006 **Matches :** 44/170 fragment ions using 90 most intense peaks ([help](#))

| # | b          | b <sup>++</sup> | b* | b* <sup>++</sup> | b <sup>0</sup> | b <sup>0++</sup> | Seq. | y           | y <sup>++</sup> | y*          | y* <sup>++</sup> | y <sup>0</sup> | y <sup>0++</sup> |
|---|------------|-----------------|----|------------------|----------------|------------------|------|-------------|-----------------|-------------|------------------|----------------|------------------|
| 1 | 164.070605 | 82.538940       |    |                  |                |                  | Y    |             |                 |             |                  |                |                  |
| 2 | 251.102633 | 126.054954      |    |                  | 233.092068     | 117.049672       | S    | 1622.823172 | 811.915224      | 1605.796623 | 803.401950       | 1604.812607    | 802.9099         |
| 3 | 308.124097 | 154.565687      |    |                  | 290.113532     | 145.560404       | G    | 1535.791144 | 768.399210      | 1518.764595 | 759.885936       | 1517.780579    | 759.3939         |
| 4 | 395.156125 | 198.081701      |    |                  | 377.145560     | 189.076418       | S    | 1478.769680 | 739.888478      | 1461.743131 | 731.375204       | 1460.759115    | 730.8831         |
| 5 | 524.198718 | 262.602997      |    |                  | 506.188153     | 253.597715       | E    | 1391.737652 | 696.372464      | 1374.711103 | 687.859190       | 1373.727087    | 687.3671         |

|    |                    |            |                    |                   |                    |                   |   |                    |            |                    |            |                    |                 |
|----|--------------------|------------|--------------------|-------------------|--------------------|-------------------|---|--------------------|------------|--------------------|------------|--------------------|-----------------|
| 6  | 581.220182         | 291.113729 |                    |                   | 563.209617         | 282.108447        | G | <b>1262.695059</b> | 631.851167 | <b>1245.668510</b> | 623.337893 | <b>1244.684494</b> | <b>622.8458</b> |
| 7  | 668.252210         | 334.629743 |                    |                   | <b>650.241645</b>  | 325.624461        | S | <b>1205.673595</b> | 603.340436 | 1188.647046        | 594.827161 | 1187.663030        | 594.3351        |
| 8  | 769.299889         | 385.153583 |                    |                   | 751.289324         | 376.148300        | T | <b>1118.641567</b> | 559.824421 | 1101.615018        | 551.311147 | 1100.631002        | 550.8191        |
| 9  | 897.358467         | 449.182872 | 880.331918         | 440.669597        | <b>879.347902</b>  | 440.177589        | Q | <b>1017.593888</b> | 509.300582 | <b>1000.567339</b> | 500.787307 | 999.583323         | 500.2952        |
| 10 | 998.406146         | 499.706711 | 981.379597         | 491.193437        | <b>980.395581</b>  | 490.701429        | T | 889.535310         | 445.271293 | 872.508761         | 436.758018 | 871.524745         | 436.2660        |
| 11 | 1111.490210        | 556.248743 | 1094.463661        | 547.735469        | <b>1093.479645</b> | 547.243461        | L | <b>788.487631</b>  | 394.747453 | 771.461082         | 386.234179 | 770.477066         | 385.7421        |
| 12 | 1212.537889        | 606.772583 | 1195.511340        | 598.259308        | <b>1194.527324</b> | 597.767300        | T | <b>675.403567</b>  | 338.205421 | 658.377018         | 329.692147 | 657.393002         | 329.2001        |
| 13 | <b>1340.632852</b> | 670.820064 | 1323.606303        | 662.306790        | 1322.622287        | 661.814782        | K | <b>574.355888</b>  | 287.681582 | 557.329339         | 279.168307 | 556.345323         | 278.6762        |
| 14 | <b>1397.654316</b> | 699.330796 | 1380.627767        | 690.817522        | 1379.643751        | 690.325514        | G | <b>446.260925</b>  | 223.634100 | 429.234376         | 215.120826 | 428.250360         | 214.6288        |
| 15 | <b>1526.696909</b> | 763.852093 | <b>1509.670360</b> | 755.338818        | <b>1508.686344</b> | 754.846810        | E | <b>389.239461</b>  | 195.123368 | 372.212912         | 186.610094 | <b>371.228896</b>  | 186.1180        |
| 16 | <b>1639.780973</b> | 820.394124 | <b>1622.754424</b> | <b>811.880850</b> | <b>1621.770408</b> | <b>811.388842</b> | L | <b>260.196868</b>  | 130.602072 | 243.170319         | 122.088797 |                    |                 |
| 17 |                    |            |                    |                   |                    |                   | K | 147.112804         | 74.060040  | 130.086255         | 65.546765  |                    |                 |

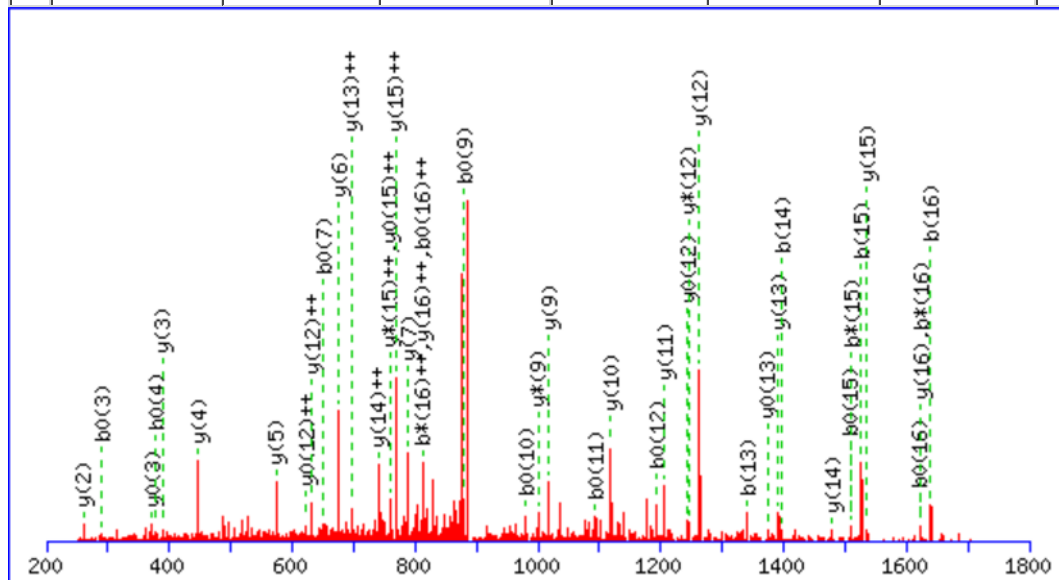

## Peptide View

MS/MS Fragmentation of **QVLLSAAEAAEVILR**



Found in **IPI00297779**, Tax\_Id=9606 Gene\_Symbol=CCT2 T-complex protein 1 subunit beta

**Experiment:** 16 - NOPA1 **Fraction:** NOPA1

Match to Query 10722: 1581.905648 from(791.960100,2+)

Title: OECHL100310\_03.20896.20896.2.dta

Data file \\BOROMIR\Masse\Data LTQ-Orbitrap\Chrystelle Lacroix\Etude clinique sJPU\OECHL100310\_03.raw

**Monoisotopic mass of neutral peptide Mr(calc):** 1581.908966 **Fixed modifications:** Carbamidomethyl (C) (apply to specified residues or termini only) **Ions**

**Score:** 101 **Expect:** 3e-009 **Matches :** 14/152 fragment ions using 14 most intense peaks ([help](#))

| #  | b           | b <sup>++</sup> | b*          | b <sup>*++</sup> | b <sup>0</sup> | b <sup>0++</sup> | Seq. | y           | y <sup>++</sup> | y*          | y <sup>*++</sup> | y <sup>0</sup> | y <sup>0++</sup> |
|----|-------------|-----------------|-------------|------------------|----------------|------------------|------|-------------|-----------------|-------------|------------------|----------------|------------------|
| 1  | 129.065854  | 65.036565       | 112.039305  | 56.523291        |                |                  | Q    |             |                 |             |                  |                |                  |
| 2  | 228.134268  | 114.570772      | 211.107719  | 106.057498       |                |                  | V    | 1454.857706 | 727.932491      | 1437.831157 | 719.419217       | 1436.847141    | 718.9272         |
| 3  | 341.218332  | 171.112804      | 324.191783  | 162.599530       |                |                  | L    | 1355.789292 | 678.398284      | 1338.762743 | 669.885010       | 1337.778727    | 669.3930         |
| 4  | 454.302396  | 227.654836      | 437.275847  | 219.141562       |                |                  | L    | 1242.705228 | 621.856252      | 1225.678679 | 613.342977       | 1224.694663    | 612.8509         |
| 5  | 541.334424  | 271.170850      | 524.307875  | 262.657576       | 523.323859     | 262.165568       | S    | 1129.621164 | 565.314220      | 1112.594615 | 556.800946       | 1111.610599    | 556.3089         |
| 6  | 612.371538  | 306.689407      | 595.344989  | 298.176133       | 594.360973     | 297.684125       | A    | 1042.589136 | 521.798206      | 1025.562587 | 513.284931       | 1024.578571    | 512.7929         |
| 7  | 683.408652  | 342.207964      | 666.382103  | 333.694690       | 665.398087     | 333.202682       | A    | 971.552022  | 486.279649      | 954.525473  | 477.766374       | 953.541457     | 477.2743         |
| 8  | 812.451245  | 406.729261      | 795.424696  | 398.215986       | 794.440680     | 397.723978       | E    | 900.514908  | 450.761092      | 883.488359  | 442.247817       | 882.504343     | 441.7558         |
| 9  | 883.488359  | 442.247818      | 866.461810  | 433.734543       | 865.477794     | 433.242535       | A    | 771.472315  | 386.239795      | 754.445766  | 377.726521       | 753.461750     | 377.2345         |
| 10 | 954.525473  | 477.766375      | 937.498924  | 469.253100       | 936.514908     | 468.761092       | A    | 700.435201  | 350.721238      | 683.408652  | 342.207964       | 682.424636     | 341.7159         |
| 11 | 1083.568066 | 542.287671      | 1066.541517 | 533.774397       | 1065.557501    | 533.282389       | E    | 629.398087  | 315.202681      | 612.371538  | 306.689407       | 611.387522     | 306.1973         |
| 12 | 1182.636480 | 591.821878      | 1165.609931 | 583.308604       | 1164.625915    | 582.816596       | V    | 500.355494  | 250.681385      | 483.328945  | 242.168110       |                |                  |
| 13 | 1295.720544 | 648.363910      | 1278.693995 | 639.850636       | 1277.709979    | 639.358628       | I    | 401.287080  | 201.147178      | 384.260531  | 192.633903       |                |                  |
| 14 | 1408.804608 | 704.905942      | 1391.778059 | 696.392668       | 1390.794043    | 695.900659       | L    | 288.203016  | 144.605146      | 271.176467  | 136.091871       |                |                  |
| 15 |             |                 |             |                  |                |                  | R    | 175.118952  | 88.063114       | 158.092403  | 79.549839        |                |                  |

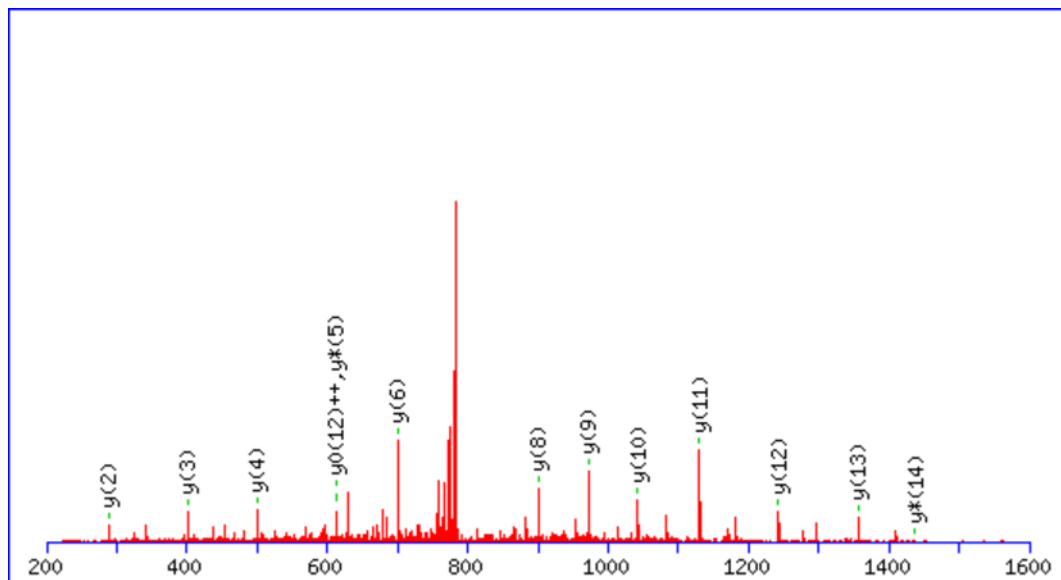

## Peptide View

MS/MS Fragmentation of **GVDEVTVNILTNR**

Found in **IPI00909509**, Tax\_Id=9606 Gene\_Symbol=- cDNA FLJ59138, highly similar to Annexin A2

**Experiment:** 16 - NOPA1 **Fraction:** NOPA1

Match to Query 10284: 1541.841048 from(771.927800,2+)

Title: OECHL100310\_03.20229.20229.2.dta

Data file \\BOROMIR\Masse\Data LTQ-Orbitrap\Chrystelle Lacroix\Etude clinique sJPU\OECHL100310\_03.raw

**Monoisotopic mass of neutral peptide Mr(calc):** 1541.841324 **Fixed modifications:** Carbamidomethyl (C) (apply to specified residues or termini only) **Ions**

**Score:** 63 **Expect:** 3.7e-005 **Matches :** 29/132 fragment ions using 49 most intense peaks ([help](#))

| # | b                 | b <sup>++</sup> | b* | b <sup>*++</sup> | b <sup>0</sup> | b <sup>0++</sup> | Seq.     | y           | y <sup>++</sup> | y*                 | y <sup>*++</sup> | y <sup>0</sup>     | y <sup>0++</sup> |
|---|-------------------|-----------------|----|------------------|----------------|------------------|----------|-------------|-----------------|--------------------|------------------|--------------------|------------------|
| 1 | 58.028740         | 29.518008       |    |                  |                |                  | <b>G</b> |             |                 |                    |                  |                    |                  |
| 2 | 157.097154        | 79.052215       |    |                  |                |                  | <b>V</b> | 1485.827134 | 743.417205      | 1468.800585        | 734.903931       | 1467.816569        | 734.4119         |
| 3 | <b>272.124097</b> | 136.565687      |    |                  | 254.113532     | 127.560404       | <b>D</b> | 1386.758720 | 693.882998      | <b>1369.732171</b> | 685.369723       | <b>1368.748155</b> | 684.8777         |
| 4 | 401.166690        | 201.086983      |    |                  | 383.156125     | 192.081701       | <b>E</b> | 1271.731777 | 636.369526      | <b>1254.705228</b> | 627.856252       | 1253.721212        | 627.3642         |
| 5 | <b>500.235104</b> | 250.621190      |    |                  | 482.224539     | 241.615908       | <b>V</b> | 1142.689184 | 571.848230      | 1125.662635        | 563.334955       | 1124.678619        | 562.8429         |

|    |                    |            |                    |            |                    |            |          |                    |                   |                   |            |             |          |
|----|--------------------|------------|--------------------|------------|--------------------|------------|----------|--------------------|-------------------|-------------------|------------|-------------|----------|
| 6  | <b>601.282783</b>  | 301.145030 |                    |            | 583.272218         | 292.139747 | <b>T</b> | <b>1043.620770</b> | 522.314023        | 1026.594221       | 513.800748 | 1025.610205 | 513.3087 |
| 7  | <b>714.366847</b>  | 357.687062 |                    |            | <b>696.356282</b>  | 348.681779 | <b>I</b> | <b>942.573091</b>  | 471.790183        | 925.546542        | 463.276909 | 924.562526  | 462.7849 |
| 8  | <b>813.435261</b>  | 407.221269 |                    |            | 795.424696         | 398.215986 | <b>V</b> | <b>829.489027</b>  | <b>415.248151</b> | 812.462478        | 406.734877 | 811.478462  | 406.2428 |
| 9  | <b>927.478188</b>  | 464.242732 | 910.451639         | 455.729458 | 909.467623         | 455.237450 | <b>N</b> | <b>730.420613</b>  | 365.713944        | <b>713.394064</b> | 357.200670 | 712.410048  | 356.7086 |
| 10 | <b>1040.562252</b> | 520.784764 | 1023.535703        | 512.271489 | 1022.551687        | 511.779481 | <b>I</b> | <b>616.377686</b>  | 308.692481        | 599.351137        | 300.179206 | 598.367121  | 299.6871 |
| 11 | <b>1153.646316</b> | 577.326796 | <b>1136.619767</b> | 568.813521 | <b>1135.635751</b> | 568.321513 | <b>L</b> | <b>503.293622</b>  | 252.150449        | 486.267073        | 243.637174 | 485.283057  | 243.1451 |
| 12 | <b>1254.693995</b> | 627.850635 | <b>1237.667446</b> | 619.337361 | <b>1236.683430</b> | 618.845353 | <b>T</b> | <b>390.209558</b>  | 195.608417        | 373.183009        | 187.095142 | 372.198993  | 186.6031 |
| 13 | <b>1368.736922</b> | 684.872099 | 1351.710373        | 676.358824 | 1350.726357        | 675.866816 | <b>N</b> | <b>289.161879</b>  | 145.084577        | <b>272.135330</b> | 136.571303 |             |          |
| 14 |                    |            |                    |            |                    |            | <b>R</b> | 175.118952         | 88.063114         | 158.092403        | 79.549839  |             |          |

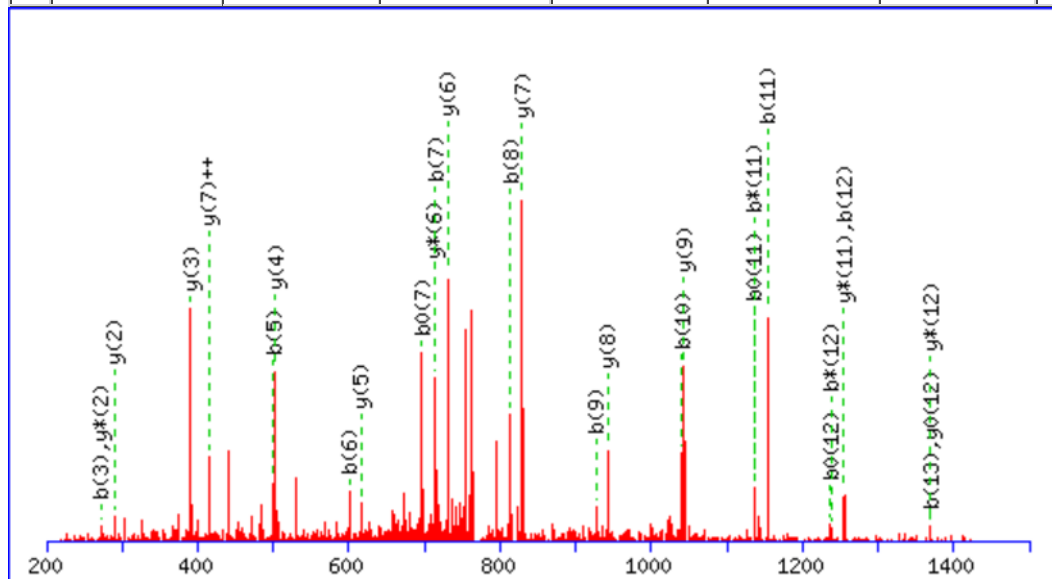

## Peptide View

MS/MS Fragmentation of **TSVAYVTPGDSETAPVVTVTHR**

Found in **IPI00022039**, Tax\_Id=9606 Gene\_Symbol=CD84 Isoform 3 of SLAM family member 5

**Experiment:** 16 - NOPA1 **Fraction:** NOPA1

Match to Query 15362: 2286.147448 from(1144.081000,2+)

Title: OECHL100310\_03.12668.12668.2.dta

Data file \\BOROMIR\Masse\Data LTQ-Orbitrap\Chrystelle Lacroix\Etude clinique sJPU\OECHL100310\_03.raw

**Monoisotopic mass of neutral peptide Mr(calc):** 2286.149231**Fixed modifications:** Carbamidomethyl (C) (apply to specified residues or termini only)**Ions****Score:** 77 **Expect:** 3.5e-006**Matches :** 18/206 fragment ions using 34 most intense peaks ([help](#))

| #  | b           | b <sup>++</sup> | b <sup>0</sup> | b <sup>0++</sup> | Seq. | y           | y <sup>++</sup> | y*          | y* <sup>++</sup> | y <sup>0</sup> | y <sup>0++</sup> | #  |
|----|-------------|-----------------|----------------|------------------|------|-------------|-----------------|-------------|------------------|----------------|------------------|----|
| 1  | 102.054955  | 51.531116       | 84.044390      | 42.525833        | T    |             |                 |             |                  |                |                  | 22 |
| 2  | 189.086983  | 95.047129       | 171.076418     | 86.041847        | S    | 2186.108791 | 1093.558034     | 2169.082242 | 1085.044759      | 2168.098226    | 1084.552751      | 21 |
| 3  | 288.155397  | 144.581336      | 270.144832     | 135.576054       | V    | 2099.076763 | 1050.042019     | 2082.050214 | 1041.528745      | 2081.066198    | 1041.036737      | 20 |
| 4  | 359.192511  | 180.099894      | 341.181946     | 171.094611       | A    | 2000.008349 | 1000.507813     | 1982.981800 | 991.994538       | 1981.997784    | 991.502530       | 19 |
| 5  | 522.255840  | 261.631558      | 504.245275     | 252.626276       | Y    | 1928.971235 | 964.989256      | 1911.944686 | 956.475981       | 1910.960670    | 955.983973       | 18 |
| 6  | 621.324254  | 311.165765      | 603.313689     | 302.160483       | V    | 1765.907906 | 883.457591      | 1748.881357 | 874.944317       | 1747.897341    | 874.452309       | 17 |
| 7  | 722.371933  | 361.689605      | 704.361368     | 352.684322       | T    | 1666.839492 | 833.923384      | 1649.812943 | 825.410110       | 1648.828927    | 824.918102       | 16 |
| 8  | 819.424697  | 410.215987      | 801.414132     | 401.210704       | P    | 1565.791813 | 783.399545      | 1548.765264 | 774.886270       | 1547.781248    | 774.394262       | 15 |
| 9  | 876.446161  | 438.726719      | 858.435596     | 429.721436       | G    | 1468.739049 | 734.873163      | 1451.712500 | 726.359888       | 1450.728484    | 725.867880       | 14 |
| 10 | 991.473104  | 496.240190      | 973.462539     | 487.234908       | D    | 1411.717585 | 706.362431      | 1394.691036 | 697.849156       | 1393.707020    | 697.357148       | 13 |
| 11 | 1078.505132 | 539.756204      | 1060.494567    | 530.750922       | S    | 1296.690642 | 648.848959      | 1279.664093 | 640.335685       | 1278.680077    | 639.843677       | 12 |
| 12 | 1207.547725 | 604.277501      | 1189.537160    | 595.272218       | E    | 1209.658614 | 605.332945      | 1192.632065 | 596.819671       | 1191.648049    | 596.327663       | 11 |
| 13 | 1308.595404 | 654.801340      | 1290.584839    | 645.796058       | T    | 1080.616021 | 540.811649      | 1063.589472 | 532.298374       | 1062.605456    | 531.806366       | 10 |
| 14 | 1379.632518 | 690.319897      | 1361.621953    | 681.314615       | A    | 979.568342  | 490.287809      | 962.541793  | 481.774535       | 961.557777     | 481.282527       | 9  |
| 15 | 1476.685282 | 738.846279      | 1458.674717    | 729.840997       | P    | 908.531228  | 454.769252      | 891.504679  | 446.255978       | 890.520663     | 445.763970       | 8  |
| 16 | 1575.753696 | 788.380486      | 1557.743131    | 779.375204       | V    | 811.478464  | 406.242870      | 794.451915  | 397.729596       | 793.467899     | 397.237588       | 7  |
| 17 | 1674.822110 | 837.914693      | 1656.811545    | 828.909411       | V    | 712.410050  | 356.708663      | 695.383501  | 348.195389       | 694.399485     | 347.703381       | 6  |
| 18 | 1775.869789 | 888.438533      | 1757.859224    | 879.433250       | T    | 613.341636  | 307.174456      | 596.315087  | 298.661182       | 595.331071     | 298.169174       | 5  |
| 19 | 1874.938203 | 937.972740      | 1856.927638    | 928.967457       | V    | 512.293957  | 256.650617      | 495.267408  | 248.137342       | 494.283392     | 247.645334       | 4  |
| 20 | 1975.985882 | 988.496579      | 1957.975317    | 979.491297       | T    | 413.225543  | 207.116410      | 396.198994  | 198.603135       | 395.214978     | 198.111127       | 3  |
| 21 | 2113.044794 | 1057.026035     | 2095.034229    | 1048.020753      | H    | 312.177864  | 156.592570      | 295.151315  | 148.079296       |                |                  | 2  |
| 22 |             |                 |                |                  | R    | 175.118952  | 88.063114       | 158.092403  | 79.549839        |                |                  | 1  |

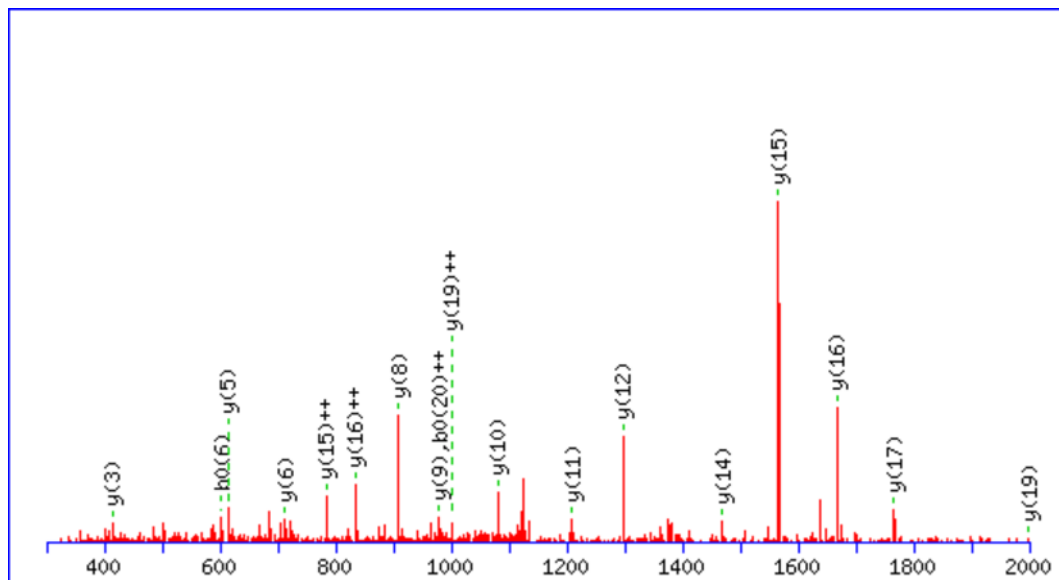

## Peptide View

MS/MS Fragmentation of **LLYDASNLETGVPSR**

Found in **IPI00003111**, Tax\_Id=9606 Gene\_Symbol=LOC652694 Ig kappa chain V-I region AU

**Experiment:** 16 - NOPA1 **Fraction:** NOPA1

Match to Query 12362: 1746.914848 from(874.464700,2+)

Title: OECHL100310\_03.16888.16888.2.dta

Data file \\BOROMIR\Masse\Data LTQ-Orbitrap\Chrystelle Lacroix\Etude clinique sJPU\OECHL100310\_03.raw

**Monoisotopic mass of neutral peptide Mr(calc):** 1746.915192 **Fixed modifications:** Carbamidomethyl (C) (apply to specified residues or termini only) **Ions**

**Score:** 72 **Expect:** 6.4e-006 **Matches :** 20/156 fragment ions using 31 most intense peaks ([help](#))

| # | b                 | b <sup>++</sup> | b* | b <sup>*++</sup> | b <sup>0</sup> | b <sup>0++</sup> | Seq. | y                  | y <sup>++</sup>   | y*                 | y <sup>*++</sup> | y <sup>0</sup>     | y <sup>0++</sup> |
|---|-------------------|-----------------|----|------------------|----------------|------------------|------|--------------------|-------------------|--------------------|------------------|--------------------|------------------|
| 1 | 114.091340        | 57.549308       |    |                  |                |                  | L    |                    |                   |                    |                  |                    |                  |
| 2 | 227.175404        | 114.091340      |    |                  |                |                  | L    | 1634.838427        | 817.922852        | 1617.811878        | 809.409577       | 1616.827862        | 808.9175         |
| 3 | 340.259468        | 170.633372      |    |                  |                |                  | I    | <b>1521.754363</b> | 761.380820        | <b>1504.727814</b> | 752.867545       | 1503.743798        | 752.3755         |
| 4 | 503.322797        | 252.165036      |    |                  |                |                  | Y    | 1408.670299        | <b>704.838788</b> | 1391.643750        | 696.325513       | <b>1390.659734</b> | 695.8335         |
| 5 | <b>618.349740</b> | 309.678508      |    |                  | 600.339175     | 300.673226       | D    | <b>1245.606970</b> | 623.307123        | 1228.580421        | 614.793849       | 1227.596405        | 614.3018         |

|    |                    |            |             |            |             |            |   |                    |            |             |            |                   |          |
|----|--------------------|------------|-------------|------------|-------------|------------|---|--------------------|------------|-------------|------------|-------------------|----------|
| 6  | 689.386854         | 345.197065 |             |            | 671.376289  | 336.191782 | A | <b>1130.580027</b> | 565.793652 | 1113.553478 | 557.280377 | 1112.569462       | 556.7883 |
| 7  | 776.418882         | 388.713079 |             |            | 758.408317  | 379.707796 | S | <b>1059.542913</b> | 530.275095 | 1042.516364 | 521.761820 | 1041.532348       | 521.2698 |
| 8  | 890.461809         | 445.734542 | 873.435260  | 437.221268 | 872.451244  | 436.729260 | N | <b>972.510885</b>  | 486.759081 | 955.484336  | 478.245806 | 954.500320        | 477.7537 |
| 9  | <b>1003.545873</b> | 502.276574 | 986.519324  | 493.763300 | 985.535308  | 493.271292 | L | 858.467958         | 429.737617 | 841.441409  | 421.224343 | 840.457393        | 420.7323 |
| 10 | <b>1132.588466</b> | 566.797871 | 1115.561917 | 558.284597 | 1114.577901 | 557.792588 | E | <b>745.383894</b>  | 373.195585 | 728.357345  | 364.682311 | <b>727.373329</b> | 364.1903 |
| 11 | <b>1233.636145</b> | 617.321710 | 1216.609596 | 608.808436 | 1215.625580 | 608.316428 | T | <b>616.341301</b>  | 308.674289 | 599.314752  | 300.161014 | 598.330736        | 299.6690 |
| 12 | 1290.657609        | 645.832442 | 1273.631060 | 637.319168 | 1272.647044 | 636.827160 | G | <b>515.293622</b>  | 258.150449 | 498.267073  | 249.637175 | 497.283057        | 249.1451 |
| 13 | <b>1389.726023</b> | 695.366649 | 1372.699474 | 686.853375 | 1371.715458 | 686.361367 | V | <b>458.272158</b>  | 229.639717 | 441.245609  | 221.126443 | 440.261593        | 220.6344 |
| 14 | 1486.778787        | 743.893032 | 1469.752238 | 735.379757 | 1468.768222 | 734.887749 | P | <b>359.203744</b>  | 180.105510 | 342.177195  | 171.592236 | 341.193179        | 171.1002 |
| 15 | <b>1573.810815</b> | 787.409046 | 1556.784266 | 778.895771 | 1555.800250 | 778.403763 | S | 262.150980         | 131.579128 | 245.124431  | 123.065854 | 244.140415        | 122.5738 |
| 16 |                    |            |             |            |             |            | R | 175.118952         | 88.063114  | 158.092403  | 79.549839  |                   |          |

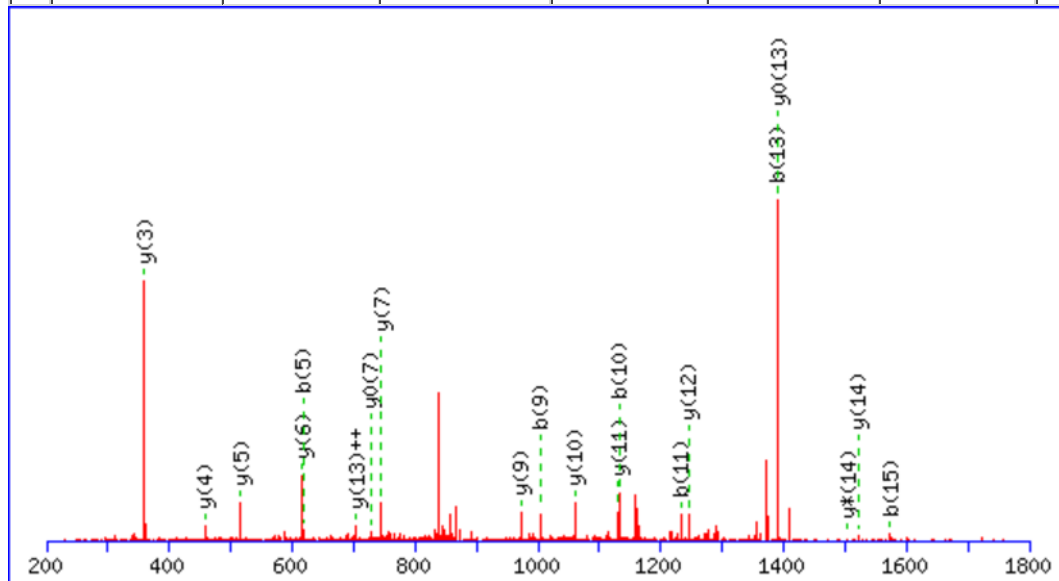

## Peptide View

MS/MS Fragmentation of **AGLIDDAFSLAR**

Found in **IPI00007798**, Tax\_Id=9606 Gene\_Symbol=TRHDE Thyrotropin-releasing hormone-degrading ectoenzyme

**Experiment:** 16 - NOPA1 **Fraction:** NOPA1

Match to Query 6999: 1247.650648 from(624.832600,2+)

Title: OECHL100310\_03.19329.19329.2.dta

Data file \\BOROMIR\Masse\Data LTQ-Orbitrap\Chrystelle Lacroix\Etude clinique sJPU\OECHL100310\_03.raw

**Monoisotopic mass of neutral peptide Mr(calc):** 1247.650986**Fixed modifications:** Carbamidomethyl (C) (apply to specified residues or termini only)**Ions****Score:** 51 **Expect:** 0.00095**Matches :** 25/96 fragment ions using 66 most intense peaks ([help](#))

| #         | <b>b</b>           | <b>b<sup>++</sup></b> | <b>b<sup>0</sup></b> | <b>b<sup>0++</sup></b> | Seq.     | <b>y</b>           | <b>y<sup>++</sup></b> | <b>y*</b>          | <b>y*<sup>++</sup></b> | <b>y<sup>0</sup></b> | <b>y<sup>0++</sup></b> | #         |
|-----------|--------------------|-----------------------|----------------------|------------------------|----------|--------------------|-----------------------|--------------------|------------------------|----------------------|------------------------|-----------|
| <b>1</b>  | 72.044390          | 36.525833             |                      |                        | <b>A</b> |                    |                       |                    |                        |                      |                        | <b>12</b> |
| <b>2</b>  | 129.065854         | 65.036565             |                      |                        | <b>G</b> | <b>1177.621164</b> | 589.314220            | 1160.594615        | 580.800946             | 1159.610599          | 580.308938             | <b>11</b> |
| <b>3</b>  | <b>242.149918</b>  | 121.578597            |                      |                        | <b>L</b> | <b>1120.599700</b> | <b>560.803488</b>     | <b>1103.573151</b> | 552.290214             | <b>1102.589135</b>   | 551.798205             | <b>10</b> |
| <b>4</b>  | <b>355.233982</b>  | 178.120629            |                      |                        | <b>I</b> | <b>1007.515636</b> | 504.261456            | 990.489087         | 495.748182             | 989.505071           | 495.256174             | <b>9</b>  |
| <b>5</b>  | <b>470.260925</b>  | 235.634101            | 452.250360           | 226.628818             | <b>D</b> | <b>894.431572</b>  | <b>447.719424</b>     | 877.405023         | 439.206150             | 876.421007           | 438.714142             | <b>8</b>  |
| <b>6</b>  | <b>585.287868</b>  | 293.147572            | 567.277303           | 284.142290             | <b>D</b> | <b>779.404629</b>  | 390.205953            | 762.378080         | 381.692678             | 761.394064           | 381.200670             | <b>7</b>  |
| <b>7</b>  | 656.324982         | 328.666129            | 638.314417           | 319.660847             | <b>A</b> | <b>664.377686</b>  | 332.692481            | 647.351137         | 324.179207             | 646.367121           | 323.687199             | <b>6</b>  |
| <b>8</b>  | <b>803.393396</b>  | 402.200336            | <b>785.382831</b>    | 393.195054             | <b>F</b> | <b>593.340572</b>  | 297.173924            | 576.314023         | 288.660650             | 575.330007           | 288.168642             | <b>5</b>  |
| <b>9</b>  | <b>890.425424</b>  | 445.716350            | 872.414859           | 436.711068             | <b>S</b> | <b>446.272158</b>  | 223.639717            | 429.245609         | 215.126443             | 428.261593           | 214.634435             | <b>4</b>  |
| <b>10</b> | <b>1003.509488</b> | 502.258382            | <b>985.498923</b>    | 493.253100             | <b>L</b> | <b>359.240130</b>  | 180.123703            | 342.213581         | 171.610429             |                      |                        | <b>3</b>  |
| <b>11</b> | <b>1074.546602</b> | 537.776939            | <b>1056.536037</b>   | 528.771657             | <b>A</b> | <b>246.156066</b>  | 123.581671            | 229.129517         | 115.068397             |                      |                        | <b>2</b>  |
| <b>12</b> |                    |                       |                      |                        | <b>R</b> | 175.118952         | 88.063114             | 158.092403         | 79.549839              |                      |                        | <b>1</b>  |

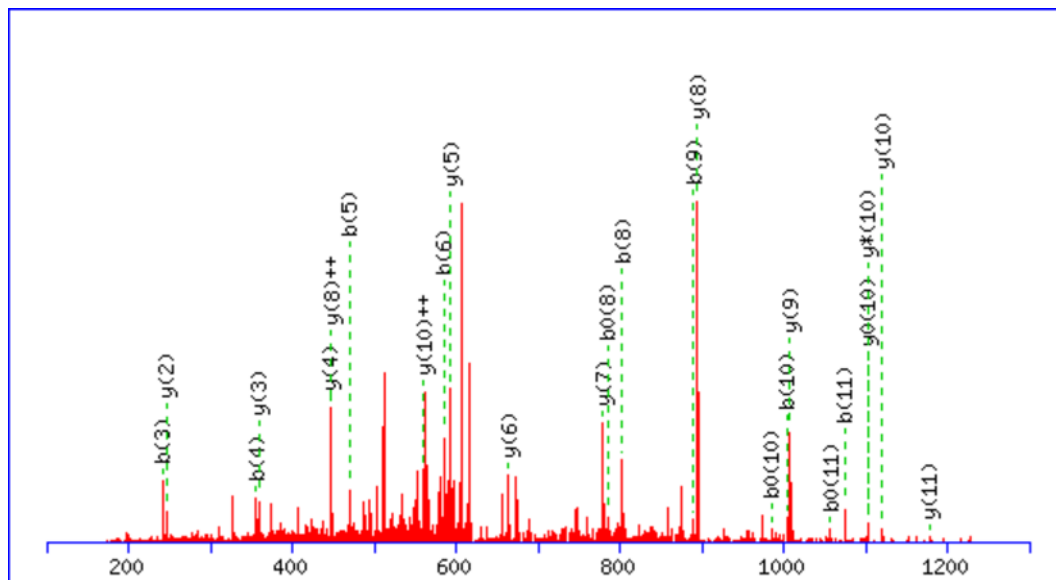

## Peptide View

MS/MS Fragmentation of **ELSELVYTDVLDLR**

Found in **IPI00102821**, Tax\_Id=9606 Gene\_Symbol=MGC29506 Isoform 1 of Proapoptotic caspase adapter protein

**Experiment:** 16 - NOPA1 **Fraction:** NOPA1

Match to Query 10441: 1550.786048 from(776.400300,2+)

Title: OECHL100310\_03.18643.18643.2.dta

Data file \\BOROMIR\Masse\Data LTQ-Orbitrap\Chrystelle Lacroix\Etude clinique sJPU\OECHL100310\_03.raw

**Monoisotopic mass of neutral peptide Mr(calc):** 1550.782791 **Fixed modifications:** Carbamidomethyl (C) (apply to specified residues or termini only) **Ions**

**Score:** 65 **Expect:** 3.1e-005 **Matches :** 27/118 fragment ions using 55 most intense peaks ([help](#))

| # | b                 | b <sup>++</sup> | b <sup>0</sup>    | b <sup>0++</sup> | Seq. | y                  | y <sup>++</sup> | y*                 | y <sup>*++</sup> | y <sup>0</sup> | y <sup>0++</sup> | #  |
|---|-------------------|-----------------|-------------------|------------------|------|--------------------|-----------------|--------------------|------------------|----------------|------------------|----|
| 1 | 130.049869        | 65.528572       | 112.039304        | 56.523290        | E    |                    |                 |                    |                  |                |                  | 13 |
| 2 | <b>243.133933</b> | 122.070605      | 225.123368        | 113.065322       | L    | <b>1422.747487</b> | 711.877382      | <b>1405.720938</b> | 703.364107       | 1404.736922    | 702.872099       | 12 |
| 3 | <b>330.165961</b> | 165.586618      | <b>312.155396</b> | 156.581336       | S    | <b>1309.663423</b> | 655.335350      | 1292.636874        | 646.822075       | 1291.652858    | 646.330067       | 11 |
| 4 | 459.208554        | 230.107915      | <b>441.197989</b> | 221.102633       | E    | <b>1222.631395</b> | 611.819336      | 1205.604846        | 603.306061       | 1204.620830    | 602.814053       | 10 |
| 5 | <b>572.292618</b> | 286.649947      | <b>554.282053</b> | 277.644665       | L    | <b>1093.588802</b> | 547.298039      | 1076.562253        | 538.784765       | 1075.578237    | 538.292757       | 9  |



|    |                    |            |                    |            |   |                   |                   |            |                   |            |            |   |
|----|--------------------|------------|--------------------|------------|---|-------------------|-------------------|------------|-------------------|------------|------------|---|
| 6  | <b>671.361032</b>  | 336.184154 | <b>653.350467</b>  | 327.178872 | V | <b>980.504738</b> | 490.756007        | 963.478189 | 482.242733        | 962.494173 | 481.750725 | 8 |
| 7  | 834.424361         | 417.715819 | 816.413796         | 408.710536 | Y | <b>881.436324</b> | <b>441.221800</b> | 864.409775 | 432.708526        | 863.425759 | 432.216518 | 7 |
| 8  | <b>935.472040</b>  | 468.239658 | <b>917.461475</b>  | 459.234376 | T | <b>718.372995</b> | 359.690136        | 701.346446 | 351.176861        | 700.362430 | 350.684853 | 6 |
| 9  | 1050.498983        | 525.753130 | 1032.488418        | 516.747847 | D | <b>617.325316</b> | 309.166296        | 600.298767 | 300.653022        | 599.314751 | 300.161014 | 5 |
| 10 | <b>1149.567397</b> | 575.287337 | <b>1131.556832</b> | 566.282054 | V | <b>502.298373</b> | 251.652824        | 485.271824 | <b>243.139550</b> | 484.287808 | 242.647542 | 4 |
| 11 | 1262.651461        | 631.829369 | 1244.640896        | 622.824086 | L | <b>403.229959</b> | 202.118617        | 386.203410 | 193.605343        | 385.219394 | 193.113335 | 3 |
| 12 | <b>1377.678404</b> | 689.342840 | 1359.667839        | 680.337558 | D | <b>290.145895</b> | 145.576585        | 273.119346 | 137.063311        | 272.135330 | 136.571303 | 2 |
| 13 |                    |            |                    |            | R | 175.118952        | 88.063114         | 158.092403 | 79.549839         |            |            | 1 |

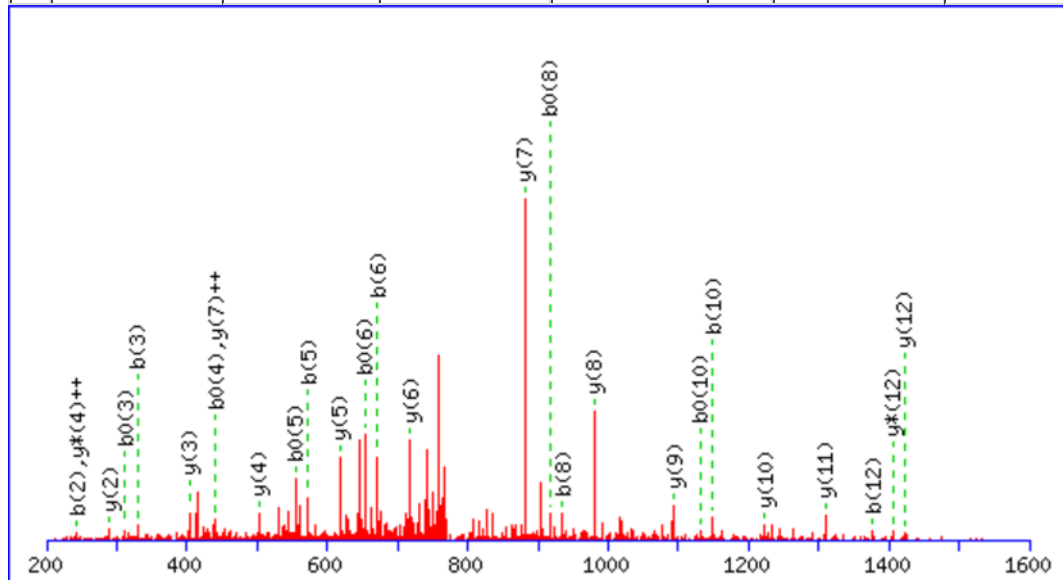

## Peptide View

MS/MS Fragmentation of **MASGAANVVGPK**

Found in **IPI00334282**, Tax\_Id=9606 Gene\_Symbol=FAM3C Protein FAM3C

**Experiment: 16 - NOPA1 Fraction: NOPA1**

Match to Query 4681: 1100.563248 from(551.288900,2+)

Title: OECHL100310\_03.5239.5239.2.dta

Data file \\BOROMIR\Masse\Data LTQ-Orbitrap\Chrystelle Lacroix\Etude clinique sJPU\OECHL100310\_03.raw

**Monoisotopic mass of neutral peptide Mr(calc):** 1100.564819**Fixed modifications:** Carbamidomethyl (C) (apply to specified residues or termini only)**Ions****Score:** 61 **Expect:** 7e-005**Matches :** 22/98 fragment ions using 37 most intense peaks ([help](#))

| #  | b                 | b <sup>++</sup> | b*                | b* <sup>++</sup> | b <sup>0</sup>    | b <sup>0++</sup> | Seq. | y                 | y <sup>++</sup>   | y*         | y* <sup>++</sup>  | y <sup>0</sup>    | y <sup>0++</sup>  | #  |
|----|-------------------|-----------------|-------------------|------------------|-------------------|------------------|------|-------------------|-------------------|------------|-------------------|-------------------|-------------------|----|
| 1  | 132.047761        | 66.527518       |                   |                  |                   |                  | M    |                   |                   |            |                   |                   |                   | 12 |
| 2  | <b>203.084875</b> | 102.046075      |                   |                  |                   |                  | A    | <b>970.531621</b> | 485.769448        | 953.505072 | 477.256174        | 952.521056        | 476.764166        | 11 |
| 3  | <b>290.116903</b> | 145.562089      |                   |                  | 272.106338        | 136.556807       | S    | <b>899.494507</b> | <b>450.250891</b> | 882.467958 | <b>441.737617</b> | <b>881.483942</b> | <b>441.245609</b> | 10 |
| 4  | 347.138367        | 174.072821      |                   |                  | 329.127802        | 165.067539       | G    | <b>812.462479</b> | 406.734877        | 795.435930 | 398.221603        |                   |                   | 9  |
| 5  | <b>418.175481</b> | 209.591378      |                   |                  | <b>400.164916</b> | 200.586096       | A    | <b>755.441015</b> | 378.224145        | 738.414466 | 369.710871        |                   |                   | 8  |
| 6  | 489.212595        | 245.109935      |                   |                  | 471.202030        | 236.104653       | A    | <b>684.403901</b> | 342.705588        | 667.377352 | 334.192314        |                   |                   | 7  |
| 7  | 603.255522        | 302.131399      | 586.228973        | 293.618124       | 585.244957        | 293.126116       | N    | <b>613.366787</b> | 307.187031        | 596.340238 | 298.673757        |                   |                   | 6  |
| 8  | <b>702.323936</b> | 351.665606      | <b>685.297387</b> | 343.152331       | <b>684.313371</b> | 342.660323       | V    | 499.323860        | 250.165568        | 482.297311 | 241.652293        |                   |                   | 5  |
| 9  | <b>801.392350</b> | 401.199813      | 784.365801        | 392.686538       | 783.381785        | 392.194530       | V    | <b>400.255446</b> | 200.631361        | 383.228897 | 192.118086        |                   |                   | 4  |
| 10 | <b>858.413814</b> | 429.710545      | 841.387265        | 421.197270       | 840.403249        | 420.705262       | G    | <b>301.187032</b> | 151.097154        | 284.160483 | 142.583879        |                   |                   | 3  |
| 11 | 955.466578        | 478.236927      | 938.440029        | 469.723652       | 937.456013        | 469.231644       | P    | <b>244.165568</b> | 122.586422        | 227.139019 | 114.073147        |                   |                   | 2  |
| 12 |                   |                 |                   |                  |                   |                  | K    | 147.112804        | 74.060040         | 130.086255 | 65.546765         |                   |                   | 1  |

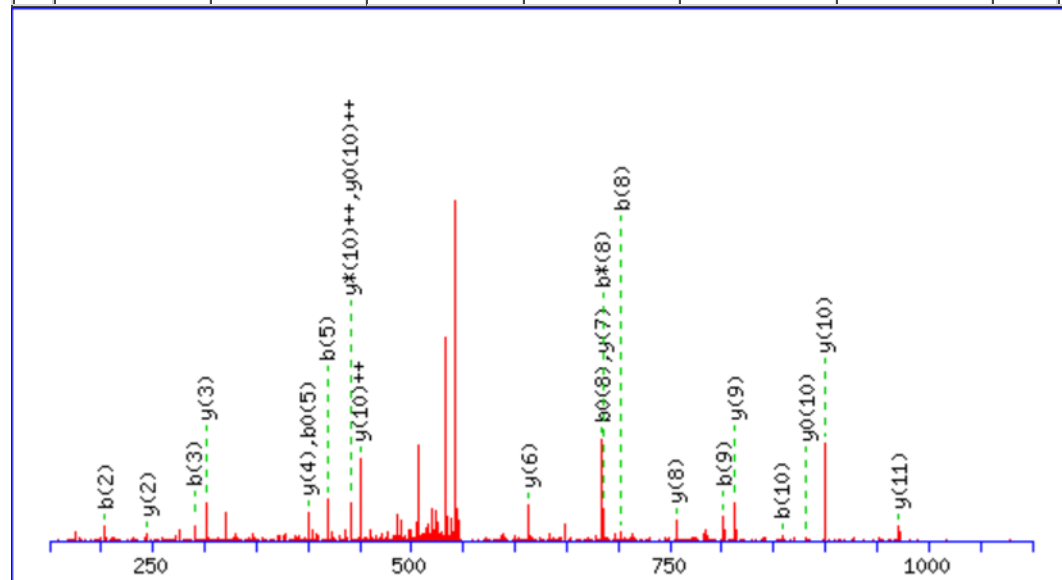

## Peptide View

MS/MS Fragmentation of **LFIGGLSFETTEESLR**

Found in **IPI00396378**, Tax\_Id=9606 Gene\_Symbol=HNRNPA2B1 Isoform B1 of Heterogeneous nuclear ribonucleoproteins A2/B1

**Experiment:** 16 - NOPA1 **Fraction:** NOPA1

Match to Query 12770: 1797.914848 from(899.964700,2+)

Title: OECHL100310\_03.19925.19925.2.dta

Data file \\BOROMIR\Masse\Data LTQ-Orbitrap\Chrystelle Lacroix\Etude clinique sJPU\OECHL100310\_03.raw

**Monoisotopic mass of neutral peptide Mr(calc):** 1797.914871 **Fixed modifications:** Carbamidomethyl (C) (apply to specified residues or termini only) **Ions**

**Score:** 55 **Expect:** 0.00045 **Matches :** 21/134 fragment ions using 48 most intense peaks ([help](#))

| #  | b                  | b <sup>++</sup> | b <sup>0</sup> | b <sup>0++</sup> | Seq. | y                  | y <sup>++</sup>   | y*          | y <sup>*++</sup>  | y <sup>0</sup> | y <sup>0++</sup>  | #  |
|----|--------------------|-----------------|----------------|------------------|------|--------------------|-------------------|-------------|-------------------|----------------|-------------------|----|
| 1  | 114.091340         | 57.549308       |                |                  | L    |                    |                   |             |                   |                |                   | 16 |
| 2  | <b>261.159754</b>  | 131.083515      |                |                  | F    | 1685.838093        | 843.422685        | 1668.811544 | 834.909410        | 1667.827528    | 834.417402        | 15 |
| 3  | 374.243818         | 187.625547      |                |                  | I    | 1538.769679        | <b>769.888478</b> | 1521.743130 | 761.375203        | 1520.759114    | 760.883195        | 14 |
| 4  | <b>431.265282</b>  | 216.136279      |                |                  | G    | <b>1425.685615</b> | 713.346446        | 1408.659066 | <b>704.833171</b> | 1407.675050    | <b>704.341163</b> | 13 |
| 5  | <b>488.286746</b>  | 244.647011      |                |                  | G    | <b>1368.664151</b> | 684.835714        | 1351.637602 | 676.322439        | 1350.653586    | 675.830431        | 12 |
| 6  | <b>601.370810</b>  | 301.189043      |                |                  | L    | <b>1311.642687</b> | 656.324982        | 1294.616138 | 647.811707        | 1293.632122    | 647.319699        | 11 |
| 7  | 688.402838         | 344.705057      | 670.392273     | 335.699774       | S    | <b>1198.558623</b> | 599.782950        | 1181.532074 | 591.269675        | 1180.548058    | 590.777667        | 10 |
| 8  | <b>835.471252</b>  | 418.239264      | 817.460687     | 409.233981       | F    | <b>1111.526595</b> | 556.266936        | 1094.500046 | 547.753661        | 1093.516030    | 547.261653        | 9  |
| 9  | <b>964.513845</b>  | 482.760561      | 946.503280     | 473.755278       | E    | <b>964.458181</b>  | 482.732729        | 947.431632  | 474.219454        | 946.447616     | 473.727446        | 8  |
| 10 | 1065.561524        | 533.284400      | 1047.550959    | 524.279117       | T    | <b>835.415588</b>  | 418.211432        | 818.389039  | 409.698158        | 817.405023     | 409.206150        | 7  |
| 11 | 1166.609203        | 583.808240      | 1148.598638    | 574.802957       | T    | <b>734.367909</b>  | 367.687593        | 717.341360  | 359.174318        | 716.357344     | 358.682310        | 6  |
| 12 | 1295.651796        | 648.329536      | 1277.641231    | 639.324253       | E    | <b>633.320230</b>  | 317.163753        | 616.293681  | 308.650479        | 615.309665     | 308.158471        | 5  |
| 13 | 1424.694389        | 712.850833      | 1406.683824    | 703.845550       | E    | <b>504.277637</b>  | 252.642457        | 487.251088  | 244.129182        | 486.267072     | 243.637174        | 4  |
| 14 | 1511.726417        | 756.366847      | 1493.715852    | 747.361564       | S    | <b>375.235044</b>  | 188.121160        | 358.208495  | 179.607885        | 357.224479     | 179.115877        | 3  |
| 15 | <b>1624.810481</b> | 812.908879      | 1606.799916    | 803.903596       | L    | 288.203016         | 144.605146        | 271.176467  | 136.091871        |                |                   | 2  |
| 16 |                    |                 |                |                  | R    | 175.118952         | 88.063114         | 158.092403  | 79.549839         |                |                   | 1  |

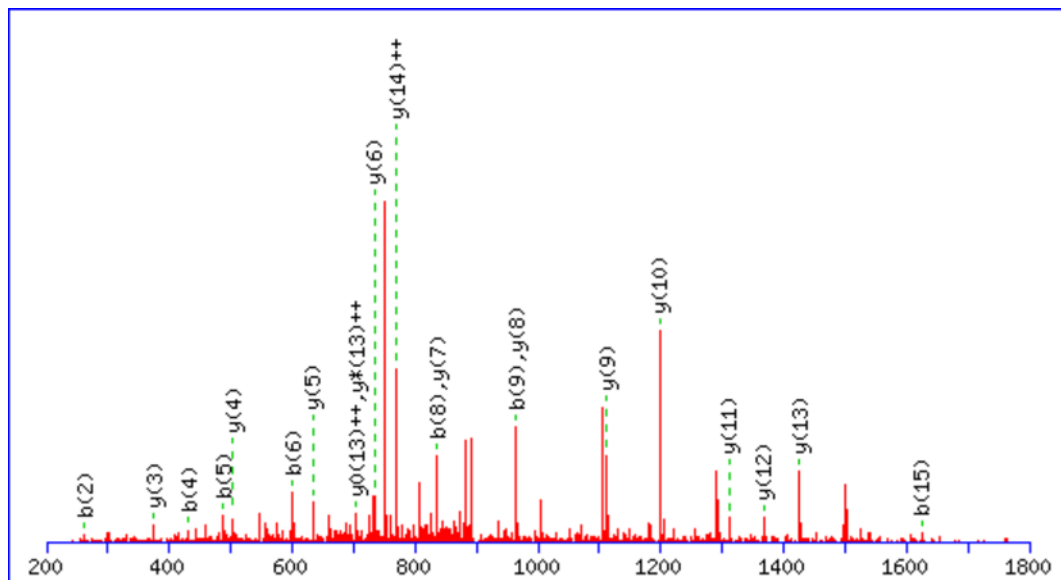

## Peptide View

MS/MS Fragmentation of **STVGFDAIR**

Found in **IPI00012842**, Tax\_Id=9606 Gene\_Symbol=SLC26A4 Pendrin

**Experiment:** 16 - NOPA1 **Fraction:** NOPA1

Match to Query 2497: 964.496648 from(483.255600,2+)

Title: OECHL100310\_03.11502.11502.2.dta

Data file \\BOROMIR\Masse\Data LTQ-Orbitrap\Chrystelle Lacroix\Etude clinique sJPU\OECHL100310\_03.raw

**Monoisotopic mass of neutral peptide Mr(calc):** 964.497803 **Fixed modifications:** Carbamidomethyl (C) (apply to specified residues or termini only) **Ions Score:**

49 **Expect:** 0.00077 **Matches :** 19/74 fragment ions using 27 most intense peaks ([help](#))

| # | b                 | b <sup>++</sup> | b <sup>0</sup>    | b <sup>0++</sup> | Seq. | y                 | y <sup>++</sup>   | y <sup>*</sup> | y <sup>*++</sup> | y <sup>0</sup>    | y <sup>0++</sup> | # |
|---|-------------------|-----------------|-------------------|------------------|------|-------------------|-------------------|----------------|------------------|-------------------|------------------|---|
| 1 | 88.039304         | 44.523290       | 70.028739         | 35.518008        | S    |                   |                   |                |                  |                   |                  | 9 |
| 2 | <b>189.086983</b> | 95.047129       | 171.076418        | 86.041847        | T    | <b>878.473044</b> | <b>439.740160</b> | 861.446495     | 431.226885       | 860.462479        | 430.734877       | 8 |
| 3 | <b>288.155397</b> | 144.581336      | <b>270.144832</b> | 135.576054       | V    | <b>777.425365</b> | <b>389.216320</b> | 760.398816     | 380.703046       | 759.414800        | 380.211038       | 7 |
| 4 | <b>345.176861</b> | 173.092068      | <b>327.166296</b> | 164.086786       | G    | <b>678.356951</b> | 339.682114        | 661.330402     | 331.168839       | <b>660.346386</b> | 330.676831       | 6 |
| 5 | 492.245275        | 246.626275      | <b>474.234710</b> | 237.620993       | F    | <b>621.335487</b> | 311.171382        | 604.308938     | 302.658107       | 603.324922        | 302.166099       | 5 |

|   |                   |            |                   |            |   |                   |            |            |            |            |            |   |
|---|-------------------|------------|-------------------|------------|---|-------------------|------------|------------|------------|------------|------------|---|
| 6 | 607.272218        | 304.139747 | 589.261653        | 295.134464 | D | <b>474.267073</b> | 237.637174 | 457.240524 | 229.123900 | 456.256508 | 228.631892 | 4 |
| 7 | <b>678.309332</b> | 339.658304 | <b>660.298767</b> | 330.653021 | A | 359.240130        | 180.123703 | 342.213581 | 171.610428 |            |            | 3 |
| 8 | <b>791.393396</b> | 396.200336 | 773.382831        | 387.195053 | I | <b>288.203016</b> | 144.605146 | 271.176467 | 136.091871 |            |            | 2 |
| 9 |                   |            |                   |            | R | <b>175.118952</b> | 88.063114  | 158.092403 | 79.549839  |            |            | 1 |

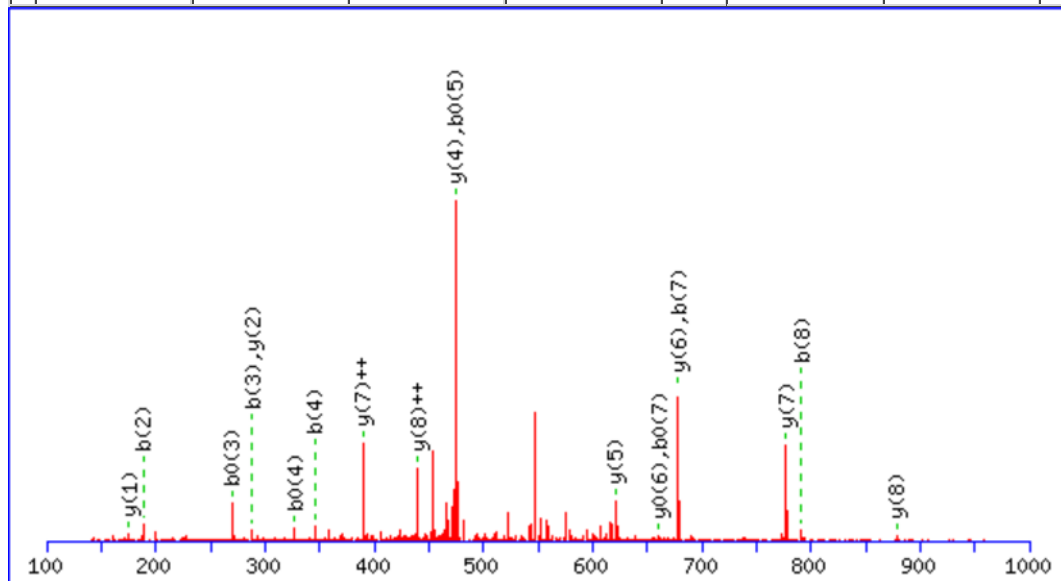

## Peptide View

MS/MS Fragmentation of **ASLQHGQAAEKGP~~HR~~**

Found in **IP100165044**, Tax\_Id=9606 Gene\_Symbol=FAM198B Isoform 2 of Protein ENED

**Experiment:** 25 - NOPD1 **Fraction:** NOPD1

Match to Query 10909: 1585.809248 from(793.911900,2+)

Title: OECHL100310\_33.1719.1719.2.dta

Data file \\BOROMIR\Masse\Data LTQ-Orbitrap\Chrystelle Lacroix\Etude clinique sJPU\OECHL100310\_33.raw

**Monoisotopic mass of neutral peptide Mr(calc):** 1585.807312**Fixed modifications:** Carbamidomethyl (C) (apply to specified residues or termini only)**Ions Score:** 71

**Expect:** 1e-005**Matches :** 14/150 fragment ions using 13 most intense peaks ([help](#))

| #  | b                  | b <sup>++</sup> | b*          | b <sup>*++</sup> | b <sup>0</sup> | b <sup>0++</sup> | Seq. | y                  | y <sup>++</sup>   | y*          | y <sup>*++</sup>  | y <sup>0</sup> | y <sup>0++</sup>  | #  |
|----|--------------------|-----------------|-------------|------------------|----------------|------------------|------|--------------------|-------------------|-------------|-------------------|----------------|-------------------|----|
| 1  | 72.044390          | 36.525833       |             |                  |                |                  | A    |                    |                   |             |                   |                |                   | 15 |
| 2  | 159.076418         | 80.041847       |             |                  | 141.065853     | 71.036564        | S    | 1515.777500        | 758.392388        | 1498.750951 | 749.879114        | 1497.766935    | 749.387106        | 14 |
| 3  | 272.160482         | 136.583879      |             |                  | 254.149917     | 127.578597       | L    | 1428.745472        | 714.876374        | 1411.718923 | 706.363100        | 1410.734907    | 705.871092        | 13 |
| 4  | 400.219060         | 200.613168      | 383.192511  | 192.099894       | 382.208495     | 191.607886       | Q    | <b>1315.661408</b> | 658.334342        | 1298.634859 | <b>649.821068</b> | 1297.650843    | <b>649.329060</b> | 12 |
| 5  | 537.277972         | 269.142624      | 520.251423  | 260.629350       | 519.267407     | 260.137342       | H    | <b>1187.602830</b> | <b>594.305053</b> | 1170.576281 | 585.791779        | 1169.592265    | 585.299771        | 11 |
| 6  | <b>594.299436</b>  | 297.653356      | 577.272887  | 289.140082       | 576.288871     | 288.648074       | G    | <b>1050.543918</b> | 525.775597        | 1033.517369 | 517.262323        | 1032.533353    | 516.770315        | 10 |
| 7  | 722.358014         | 361.682645      | 705.331465  | 353.169371       | 704.347449     | 352.677363       | Q    | <b>993.522454</b>  | 497.264865        | 976.495905  | 488.751591        | 975.511889     | 488.259583        | 9  |
| 8  | 793.395128         | 397.201202      | 776.368579  | 388.687928       | 775.384563     | 388.195920       | A    | <b>865.463876</b>  | 433.235576        | 848.437327  | 424.722302        | 847.453311     | 424.230294        | 8  |
| 9  | 864.432242         | 432.719759      | 847.405693  | 424.206485       | 846.421677     | 423.714477       | A    | 794.426762         | 397.717019        | 777.400213  | 389.203745        | 776.416197     | 388.711737        | 7  |
| 10 | <b>993.474835</b>  | 497.241056      | 976.448286  | 488.727781       | 975.464270     | 488.235773       | E    | 723.389648         | 362.198462        | 706.363099  | 353.685188        | 705.379083     | 353.193180        | 6  |
| 11 | 1121.569798        | 561.288537      | 1104.543249 | 552.775263       | 1103.559233    | 552.283255       | K    | <b>594.347055</b>  | 297.677166        | 577.320506  | 289.163891        |                |                   | 5  |
| 12 | 1178.591262        | 589.799269      | 1161.564713 | 581.285995       | 1160.580697    | 580.793987       | G    | <b>466.252092</b>  | 233.629684        | 449.225543  | 225.116409        |                |                   | 4  |
| 13 | 1275.644026        | 638.325651      | 1258.617477 | 629.812377       | 1257.633461    | 629.320369       | P    | <b>409.230628</b>  | 205.118952        | 392.204079  | 196.605677        |                |                   | 3  |
| 14 | <b>1412.702938</b> | 706.855107      | 1395.676389 | 698.341833       | 1394.692373    | 697.849825       | H    | 312.177864         | 156.592570        | 295.151315  | 148.079295        |                |                   | 2  |
| 15 |                    |                 |             |                  |                |                  | R    | 175.118952         | 88.063114         | 158.092403  | 79.549839         |                |                   | 1  |

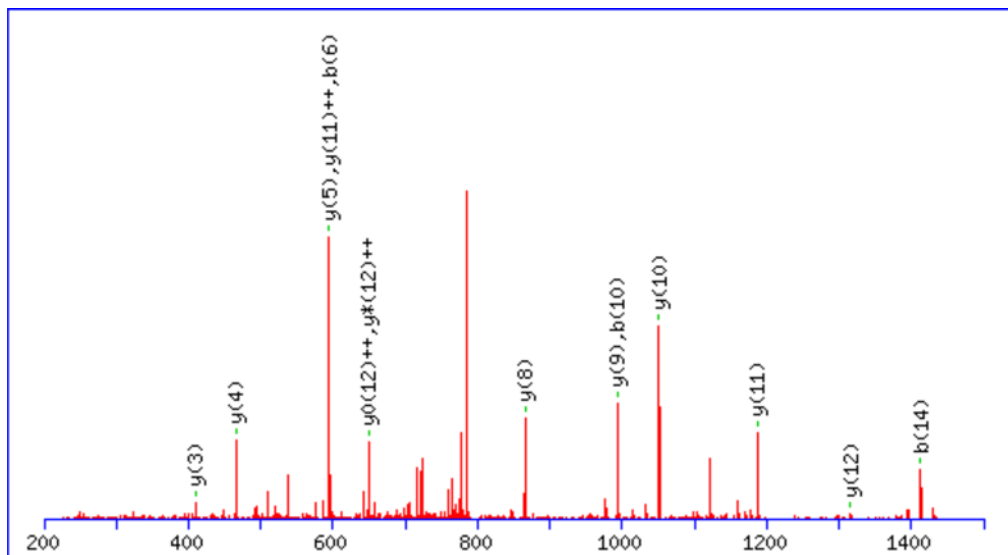

## Peptide View

MS/MS Fragmentation of **IQEVAGSLIFR**

Found in **IPI00006988**, Tax\_Id=9606 Gene\_Symbol=RETN Resistin

**Experiment:** 25 - NOPD1 **Fraction:** NOPD1

Match to Query 6507: 1231.692248 from(616.853400,2+)

Title: OECHL100310\_33.16799.16799.2.dta

Data file \\BOROMIR\Masse\Data LTQ-Orbitrap\Chrystelle Lacroix\Etude clinique sJPU\OECHL100310\_33.raw

**Monoisotopic mass of neutral peptide Mr(calc):** 1231.692459 **Fixed modifications:** Carbamidomethyl (C) (apply to specified residues or termini only) **Ions Score:** 54

**Expect:** 0.00017 **Matches :** 18/106 fragment ions using 33 most intense peaks ([help](#))

| # | b                 | b <sup>++</sup> | b*                | b* <sup>++</sup> | b <sup>0</sup> | b <sup>0++</sup> | Seq. | y                 | y <sup>++</sup> | y*                 | y* <sup>++</sup> | y <sup>0</sup>    | y <sup>0++</sup> | #  |
|---|-------------------|-----------------|-------------------|------------------|----------------|------------------|------|-------------------|-----------------|--------------------|------------------|-------------------|------------------|----|
| 1 | 114.091340        | 57.549308       |                   |                  |                |                  | I    |                   |                 |                    |                  |                   |                  | 11 |
| 2 | <b>242.149918</b> | 121.578597      | <b>225.123369</b> | 113.065323       |                |                  | Q    | 1119.615685       | 560.311481      | <b>1102.589136</b> | 551.798206       | 1101.605120       | 551.306198       | 10 |
| 3 | <b>371.192511</b> | 186.099894      | 354.165962        | 177.586619       | 353.181946     | 177.094611       | E    | <b>991.557107</b> | 496.282192      | 974.530558         | 487.768917       | <b>973.546542</b> | 487.276909       | 9  |
| 4 | <b>470.260925</b> | 235.634101      | 453.234376        | 227.120826       | 452.250360     | 226.628818       | V    | <b>862.514514</b> | 431.760895      | 845.487965         | 423.247621       | 844.503949        | 422.755613       | 8  |
| 5 | <b>541.298039</b> | 271.152658      | 524.271490        | 262.639383       | 523.287474     | 262.147375       | A    | <b>763.446100</b> | 382.226688      | 746.419551         | 373.713414       | 745.435535        | 373.221406       | 7  |
| 6 | <b>598.319503</b> | 299.663390      | 581.292954        | 291.150115       | 580.308938     | 290.658107       | G    | <b>692.408986</b> | 346.708131      | 675.382437         | 338.194857       | 674.398421        | 337.702849       | 6  |

|    |                    |            |             |            |                   |            |   |                   |            |            |            |            |            |   |
|----|--------------------|------------|-------------|------------|-------------------|------------|---|-------------------|------------|------------|------------|------------|------------|---|
| 7  | 685.351531         | 343.179404 | 668.324982  | 334.666129 | 667.340966        | 334.174121 | S | 635.387522        | 318.197399 | 618.360973 | 309.684125 | 617.376957 | 309.192117 | 5 |
| 8  | <b>798.435595</b>  | 399.721436 | 781.409046  | 391.208161 | 780.425030        | 390.716153 | L | 548.355494        | 274.681385 | 531.328945 | 266.168111 |            |            | 4 |
| 9  | <b>911.519659</b>  | 456.263468 | 894.493110  | 447.750193 | <b>893.509094</b> | 447.258185 | I | <b>435.271430</b> | 218.139353 | 418.244881 | 209.626078 |            |            | 3 |
| 10 | <b>1058.588073</b> | 529.797675 | 1041.561524 | 521.284400 | 1040.577508       | 520.792392 | F | <b>322.187366</b> | 161.597321 | 305.160817 | 153.084046 |            |            | 2 |
| 11 |                    |            |             |            |                   |            | R | 175.118952        | 88.063114  | 158.092403 | 79.549839  |            |            | 1 |

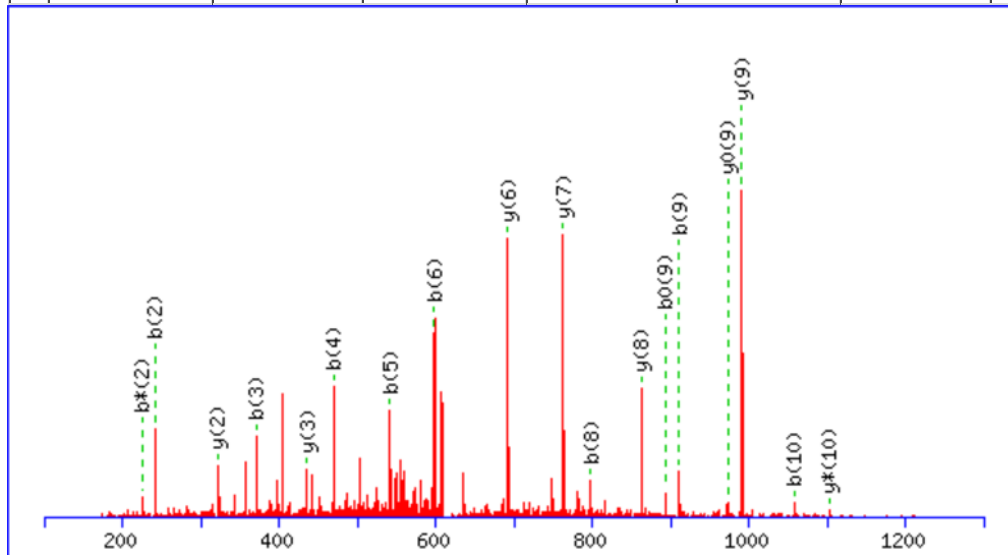

## Peptide View

MS/MS Fragmentation of **SKEDSNSTESKSSSEEDGQLK**

Found in **IPI00012734**, Tax\_Id=9606 Gene\_Symbol=DMP1 Isoform 1 of Dentin matrix acidic phosphoprotein 1

**Experiment:** 25 - NOPD1 **Fraction:** NOPD1

Match to Query 15123: 2271.001448 from(1136.508000,2+)

Title: OECHL100310\_33.2137.2137.2.dta

Data file \\BOROMIR\Masse\Data LTQ-Orbitrap\Chrystelle Lacroix\Etude clinique sJPU\OECHL100310\_33.raw

**Monoisotopic mass of neutral peptide Mr(calc):** 2270.998581 **Fixed modifications:** Carbamidomethyl (C) (apply to specified residues or termini only) **Ions Score:** 79

**Expect:** 1.2e-006 **Matches :** 41/230 fragment ions using 85 most intense peaks ([help](#))

| # | b         | b <sup>++</sup> | b* | b <sup>*++</sup> | b <sup>0</sup> | b <sup>0++</sup> | Seq. | y | y <sup>++</sup> | y* | y <sup>*++</sup> | y <sup>0</sup> | y <sup>0++</sup> |
|---|-----------|-----------------|----|------------------|----------------|------------------|------|---|-----------------|----|------------------|----------------|------------------|
| 1 | 88.039304 | 44.523290       |    |                  | 70.028739      | 35.518008        | S    |   |                 |    |                  |                |                  |



|           |                    |                    |                    |                   |                    |                   |          |                    |                   |             |                   |                   |           |
|-----------|--------------------|--------------------|--------------------|-------------------|--------------------|-------------------|----------|--------------------|-------------------|-------------|-------------------|-------------------|-----------|
| <b>2</b>  | 216.134267         | 108.570771         | 199.107718         | 100.057497        | 198.123702         | 99.565489         | <b>K</b> | 2184.973868        | 1092.990572       | 2167.947319 | 1084.477297       | 2166.963303       | 1083.9852 |
| <b>3</b>  | 345.176860         | 173.092068         | 328.150311         | 164.578793        | 327.166295         | 164.086785        | <b>E</b> | 2056.878905        | 1028.943090       | 2039.852356 | 1020.429816       | 2038.868340       | 1019.9378 |
| <b>4</b>  | <b>460.203803</b>  | 230.605539         | 443.177254         | 222.092265        | 442.193238         | 221.600257        | <b>D</b> | <b>1927.836312</b> | <b>964.421794</b> | 1910.809763 | 955.908520        | 1909.825747       | 955.4165  |
| <b>5</b>  | <b>547.235831</b>  | 274.121554         | 530.209282         | 265.608279        | 529.225266         | 265.116271        | <b>S</b> | <b>1812.809369</b> | <b>906.908323</b> | 1795.782820 | <b>898.395048</b> | 1794.798804       | 897.9030  |
| <b>6</b>  | <b>661.278758</b>  | 331.143017         | 644.252209         | 322.629743        | 643.268193         | 322.137735        | <b>N</b> | <b>1725.777341</b> | 863.392309        | 1708.750792 | 854.879034        | 1707.766776       | 854.3870  |
| <b>7</b>  | <b>748.310786</b>  | 374.659031         | 731.284237         | 366.145757        | 730.300221         | <b>365.653749</b> | <b>S</b> | <b>1611.734414</b> | <b>806.370845</b> | 1594.707865 | 797.857571        | 1593.723849       | 797.3655  |
| <b>8</b>  | 849.358465         | 425.182871         | 832.331916         | 416.669596        | 831.347900         | <b>416.177588</b> | <b>T</b> | <b>1524.702386</b> | 762.854831        | 1507.675837 | 754.341557        | 1506.691821       | 753.8495  |
| <b>9</b>  | <b>978.401058</b>  | 489.704167         | 961.374509         | 481.190893        | 960.390493         | 480.698885        | <b>E</b> | <b>1423.654707</b> | 712.330992        | 1406.628158 | 703.817717        | 1405.644142       | 703.3257  |
| <b>10</b> | 1065.433086        | 533.220181         | 1048.406537        | 524.706907        | 1047.422521        | 524.214899        | <b>S</b> | <b>1294.612114</b> | 647.809695        | 1277.585565 | 639.296421        | 1276.601549       | 638.8044  |
| <b>11</b> | <b>1193.528049</b> | 597.267663         | 1176.501500        | 588.754388        | 1175.517484        | 588.262380        | <b>K</b> | <b>1207.580086</b> | 604.293681        | 1190.553537 | 595.780407        | 1189.569521       | 595.2883  |
| <b>12</b> | 1280.560077        | 640.783677         | 1263.533528        | 632.270402        | 1262.549512        | 631.778394        | <b>S</b> | <b>1079.485123</b> | 540.246200        | 1062.458574 | 531.732925        | 1061.474558       | 531.2409  |
| <b>13</b> | <b>1367.592105</b> | 684.299691         | <b>1350.565556</b> | 675.786416        | 1349.581540        | 675.294408        | <b>S</b> | <b>992.453095</b>  | 496.730186        | 975.426546  | 488.216911        | 974.442530        | 487.7249  |
| <b>14</b> | <b>1454.624133</b> | 727.815705         | 1437.597584        | 719.302430        | 1436.613568        | 718.810422        | <b>S</b> | <b>905.421067</b>  | 453.214172        | 888.394518  | 444.700897        | 887.410502        | 444.2088  |
| <b>15</b> | <b>1583.666726</b> | 792.337001         | 1566.640177        | 783.823727        | 1565.656161        | 783.331719        | <b>E</b> | <b>818.389039</b>  | 409.698158        | 801.362490  | 401.184883        | 800.378474        | 400.6928  |
| <b>16</b> | <b>1712.709319</b> | 856.858298         | 1695.682770        | 848.345023        | 1694.698754        | 847.853015        | <b>E</b> | <b>689.346446</b>  | 345.176861        | 672.319897  | 336.663587        | <b>671.335881</b> | 336.1715  |
| <b>17</b> | <b>1827.736262</b> | <b>914.371769</b>  | <b>1810.709713</b> | <b>905.858495</b> | <b>1809.725697</b> | <b>905.366487</b> | <b>D</b> | <b>560.303853</b>  | 280.655565        | 543.277304  | 272.142290        | 542.293288        | 271.6502  |
| <b>18</b> | 1884.757726        | 942.882501         | 1867.731177        | 934.369227        | 1866.747161        | 933.877219        | <b>G</b> | <b>445.276910</b>  | 223.142093        | 428.250361  | 214.628818        |                   |           |
| <b>19</b> | 2012.816304        | 1006.911790        | <b>1995.789755</b> | 998.398516        | 1994.805739        | 997.906508        | <b>Q</b> | 388.255446         | 194.631361        | 371.228897  | 186.118087        |                   |           |
| <b>20</b> | 2125.900368        | <b>1063.453822</b> | 2108.873819        | 1054.940547       | 2107.889803        | 1054.448539       | <b>L</b> | 260.196868         | 130.602072        | 243.170319  | 122.088798        |                   |           |
| <b>21</b> |                    |                    |                    |                   |                    |                   | <b>K</b> | 147.112804         | 74.060040         | 130.086255  | 65.546765         |                   |           |

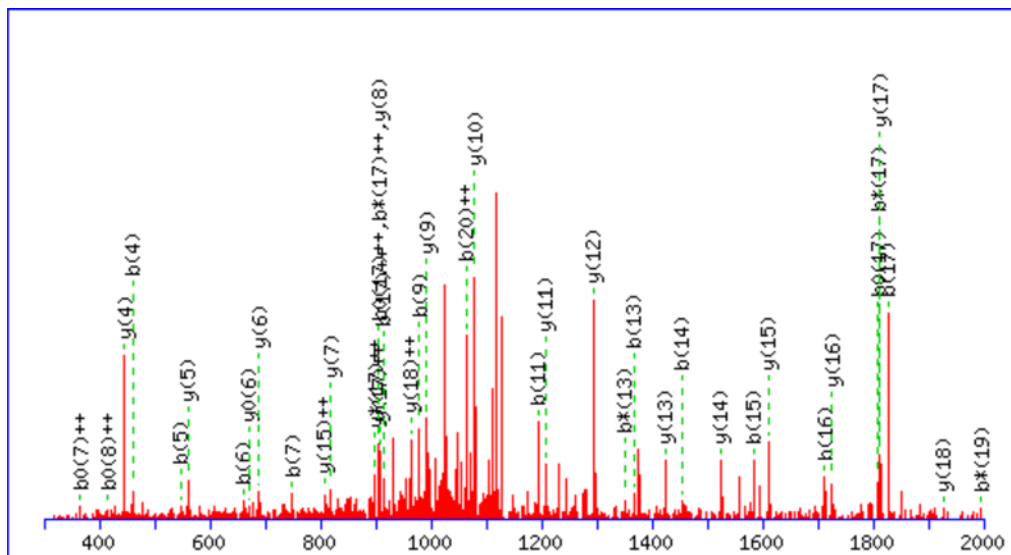

## Peptide View

MS/MS Fragmentation of **CQCPAGAALQADGR**

Found in **IPI00010737**, Tax\_Id=9606 Gene\_Symbol=THBD Thrombomodulin

**Experiment:** 25 - NOPD1 **Fraction:** NOPD1

Match to Query 9666: 1473.646048 from(737.830300,2+)

Title: OECHL100310\_33.7572.7572.2.dta

Data file \\BOROMIR\Masse\Data LTQ-Orbitrap\Chrystelle Lacroix\Etude clinique sJPU\OECHL100310\_33.raw

**Monoisotopic mass of neutral peptide Mr(calc):** 1473.645279 **Fixed modifications:** Carbamidomethyl (C) (apply to specified residues or termini only) **Ions Score:** 80

**Expect:** 4.6e-007 **Matches :** 32/128 fragment ions using 49 most intense peaks ([help](#))

| # | b                 | b <sup>++</sup> | b*                | b* <sup>++</sup>  | b <sup>0</sup> | b <sup>0++</sup> | Seq. | y                  | y <sup>++</sup>   | y*                 | y* <sup>++</sup> | y <sup>0</sup>     | y <sup>0++</sup> | #  |
|---|-------------------|-----------------|-------------------|-------------------|----------------|------------------|------|--------------------|-------------------|--------------------|------------------|--------------------|------------------|----|
| 1 | 161.037925        | 81.022600       |                   |                   |                |                  | C    |                    |                   |                    |                  |                    |                  | 14 |
| 2 | <b>289.096503</b> | 145.051890      | <b>272.069954</b> | 136.538615        |                |                  | Q    | 1314.621912        | 657.814594        | 1297.595363        | 649.301320       | 1296.611347        | 648.809312       | 13 |
| 3 | <b>449.127152</b> | 225.067214      | <b>432.100603</b> | 216.553940        |                |                  | C    | <b>1186.563334</b> | <b>593.785305</b> | 1169.536785        | 585.272031       | 1168.552769        | 584.780023       | 12 |
| 4 | <b>546.179916</b> | 273.593596      | 529.153367        | 265.080322        |                |                  | P    | <b>1026.532685</b> | 513.769981        | <b>1009.506136</b> | 505.256706       | <b>1008.522120</b> | 504.764698       | 11 |
| 5 | <b>617.217030</b> | 309.112153      | <b>600.190481</b> | 300.598879        |                |                  | A    | <b>929.479921</b>  | 465.243599        | <b>912.453372</b>  | 456.730324       | 911.469356         | 456.238316       | 10 |
| 6 | <b>674.238494</b> | 337.622885      | 657.211945        | <b>329.109611</b> |                |                  | G    | <b>858.442807</b>  | 429.725042        | 841.416258         | 421.211767       | 840.432242         | 420.719759       | 9  |

|    |                    |            |                   |            |                    |            |   |                   |            |            |            |                   |            |   |
|----|--------------------|------------|-------------------|------------|--------------------|------------|---|-------------------|------------|------------|------------|-------------------|------------|---|
| 7  | 745.275608         | 373.141442 | 728.249059        | 364.628168 |                    |            | A | 801.421343        | 401.214310 | 784.394794 | 392.701035 | 783.410778        | 392.209027 | 8 |
| 8  | <b>816.312722</b>  | 408.659999 | 799.286173        | 400.146725 |                    |            | A | <b>730.384229</b> | 365.695753 | 713.357680 | 357.182478 | 712.373664        | 356.690470 | 7 |
| 9  | <b>929.396786</b>  | 465.202031 | <b>912.370237</b> | 456.688757 |                    |            | L | <b>659.347115</b> | 330.177196 | 642.320566 | 321.663921 | 641.336550        | 321.171913 | 6 |
| 10 | <b>1057.455364</b> | 529.231320 | 1040.428815       | 520.718046 |                    |            | Q | <b>546.263051</b> | 273.635164 | 529.236502 | 265.121889 | 528.252486        | 264.629881 | 5 |
| 11 | <b>1128.492478</b> | 564.749877 | 1111.465929       | 556.236603 |                    |            | A | <b>418.204473</b> | 209.605874 | 401.177924 | 201.092600 | 400.193908        | 200.600592 | 4 |
| 12 | <b>1243.519421</b> | 622.263349 | 1226.492872       | 613.750074 | <b>1225.508856</b> | 613.258066 | D | <b>347.167359</b> | 174.087317 | 330.140810 | 165.574043 | <b>329.156794</b> | 165.082035 | 3 |
| 13 | <b>1300.540885</b> | 650.774081 | 1283.514336       | 642.260806 | 1282.530320        | 641.768798 | G | <b>232.140416</b> | 116.573846 | 215.113867 | 108.060571 |                   |            | 2 |
| 14 |                    |            |                   |            |                    |            | R | 175.118952        | 88.063114  | 158.092403 | 79.549839  |                   |            | 1 |

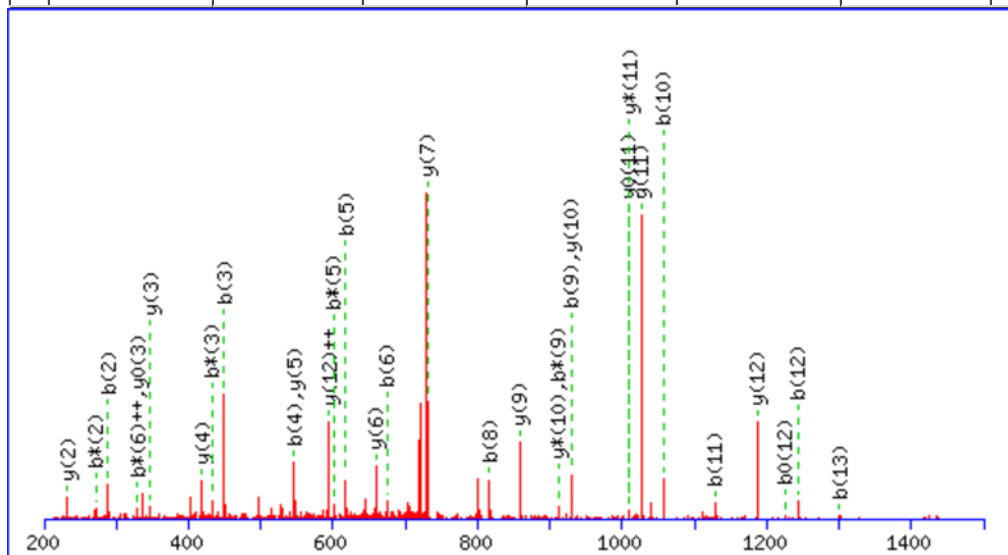

## Peptide View

MS/MS Fragmentation of **LLETECPQYIR**

Found in **IP100007047**, Tax\_Id=9606 Gene\_Symbol=S100A8 Protein S100-A8

**Experiment:** 25 - NOPD1 **Fraction:** NOPD1

Match to Query 9007: 1420.703448 from(711.359000,2+)

Title: OECHL100310\_33.12328.12328.2.dta

Data file \\BOROMIR\Masse\Data LTQ-Orbitrap\Chrystelle Lacroix\Etude clinique sJPU\OECHL100310\_33.raw

**Monoisotopic mass of neutral peptide Mr(calc):** 1420.702026 **Fixed modifications:** Carbamidomethyl (C) (apply to specified residues or termini only) **Ions Score:** 79

**Expect:** 1.4e-006**Matches :** 11/90 fragment ions using 12 most intense peaks ([help](#))

| #  | b                  | b <sup>++</sup> | b*          | b <sup>*++</sup> | b <sup>0</sup> | b <sup>0++</sup> | Seq. | y                  | y <sup>++</sup>   | y*          | y <sup>*++</sup> | y <sup>0</sup> | y <sup>0++</sup> | #  |
|----|--------------------|-----------------|-------------|------------------|----------------|------------------|------|--------------------|-------------------|-------------|------------------|----------------|------------------|----|
| 1  | 114.091340         | 57.549308       |             |                  |                |                  | L    |                    |                   |             |                  |                |                  | 11 |
| 2  | 227.175404         | 114.091340      |             |                  |                |                  | L    | <b>1308.625265</b> | 654.816271        | 1291.598716 | 646.302996       | 1290.614700    | 645.810988       | 10 |
| 3  | <b>356.217997</b>  | 178.612637      |             |                  | 338.207432     | 169.607354       | E    | <b>1195.541201</b> | <b>598.274239</b> | 1178.514652 | 589.760964       | 1177.530636    | 589.268956       | 9  |
| 4  | 457.265676         | 229.136476      |             |                  | 439.255111     | 220.131194       | T    | <b>1066.498608</b> | 533.752942        | 1049.472059 | 525.239668       | 1048.488043    | 524.747660       | 8  |
| 5  | 586.308269         | 293.657773      |             |                  | 568.297704     | 284.652490       | E    | <b>965.450929</b>  | 483.229103        | 948.424380  | 474.715828       | 947.440364     | 474.223820       | 7  |
| 6  | 746.338918         | 373.673097      |             |                  | 728.328353     | 364.667815       | C    | <b>836.408336</b>  | 418.707806        | 819.381787  | 410.194531       |                |                  | 6  |
| 7  | 843.391682         | 422.199479      |             |                  | 825.381117     | 413.194197       | P    | <b>676.377687</b>  | 338.692481        | 659.351138  | 330.179207       |                |                  | 5  |
| 8  | 971.450260         | 486.228768      | 954.423711  | 477.715494       | 953.439695     | 477.223486       | Q    | 579.324923         | 290.166099        | 562.298374  | 281.652825       |                |                  | 4  |
| 9  | 1134.513589        | 567.760433      | 1117.487040 | 559.247158       | 1116.503024    | 558.755150       | Y    | <b>451.266345</b>  | 226.136810        | 434.239796  | 217.623536       |                |                  | 3  |
| 10 | <b>1247.597653</b> | 624.302465      | 1230.571104 | 615.789190       | 1229.587088    | 615.297182       | I    | <b>288.203016</b>  | 144.605146        | 271.176467  | 136.091871       |                |                  | 2  |
| 11 |                    |                 |             |                  |                |                  | R    | 175.118952         | 88.063114         | 158.092403  | 79.549839        |                |                  | 1  |

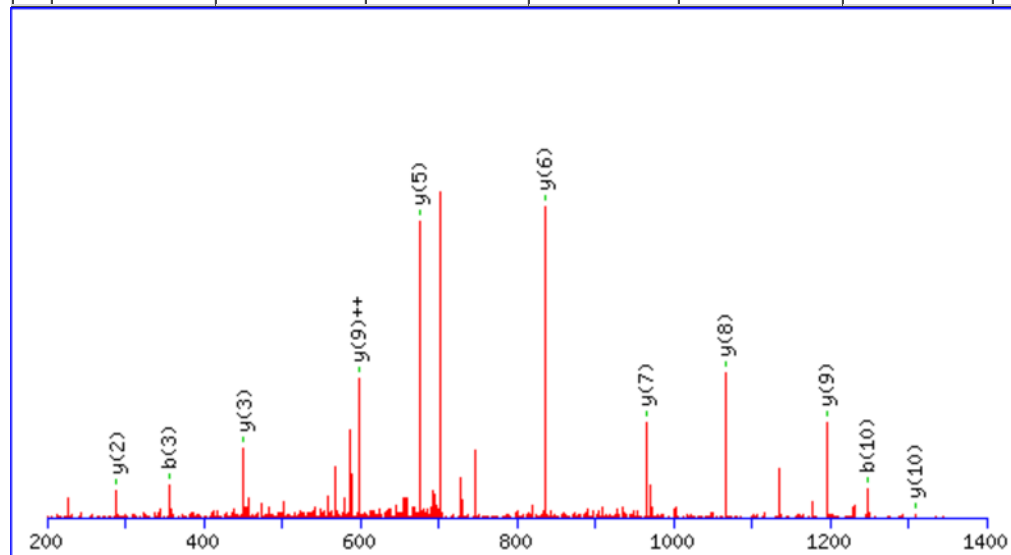

## Peptide View

MS/MS Fragmentation of **HSFKGEECPAGSHR**

Found in **IPI00021970**, Tax\_Id=9606 Gene\_Symbol=MGC31957;TNFRSF10C TNFRSF10C protein

**Experiment:** 25 - NOPD1 **Fraction:** NOPD1

Match to Query 10991: 1597.707448 from(799.861000,2+)

Title: OECHL100310\_33.2165.2165.2.dta

Data file \\BOROMIR\Masse\Data LTQ-Orbitrap\Chrystelle Lacroix\Etude clinique sJPU\OECHL100310\_33.raw

**Monoisotopic mass of neutral peptide Mr(calc):** 1597.705566**Fixed modifications:** Carbamidomethyl (C) (apply to specified residues or termini only)**Ions Score:** 69

**Expect:** 8.9e-006**Matches :** 40/144 fragment ions using 65 most intense peaks ([help](#))

| #  | b                  | b <sup>++</sup> | b <sup>*</sup>    | b <sup>*++</sup>  | b <sup>0</sup>     | b <sup>0++</sup>  | Seq. | y                  | y <sup>++</sup>   | y <sup>*</sup>     | y <sup>*++</sup>  | y <sup>0</sup>     | y <sup>0++</sup>  | #  |
|----|--------------------|-----------------|-------------------|-------------------|--------------------|-------------------|------|--------------------|-------------------|--------------------|-------------------|--------------------|-------------------|----|
| 1  | 138.066188         | 69.536732       |                   |                   |                    |                   | H    |                    |                   |                    |                   |                    |                   | 14 |
| 2  | <b>225.098216</b>  | 113.052746      |                   |                   | 207.087651         | 104.047463        | S    | <b>1461.653938</b> | <b>731.330607</b> | <b>1444.627389</b> | <b>722.817333</b> | <b>1443.643373</b> | <b>722.325325</b> | 13 |
| 3  | <b>372.166630</b>  | 186.586953      |                   |                   | <b>354.156065</b>  | 177.581671        | F    | <b>1374.621910</b> | <b>687.814593</b> | 1357.595361        | 679.301319        | 1356.611345        | 678.809311        | 12 |
| 4  | <b>500.261593</b>  | 250.634435      | <b>483.235044</b> | 242.121160        | <b>482.251028</b>  | 241.629152        | K    | <b>1227.553496</b> | <b>614.280386</b> | 1210.526947        | <b>605.767112</b> | <b>1209.542931</b> | 605.275104        | 11 |
| 5  | <b>557.283057</b>  | 279.145167      | 540.256508        | 270.631892        | <b>539.272492</b>  | 270.139884        | G    | <b>1099.458533</b> | 550.232905        | 1082.431984        | 541.719630        | 1081.447968        | 541.227622        | 10 |
| 6  | <b>686.325650</b>  | 343.666463      | 669.299101        | 335.153189        | 668.315085         | 334.661181        | E    | <b>1042.437069</b> | 521.722173        | 1025.410520        | 513.208898        | 1024.426504        | 512.716890        | 9  |
| 7  | 815.368243         | 408.187760      | 798.341694        | <b>399.674485</b> | 797.357678         | <b>399.182477</b> | E    | <b>913.394476</b>  | 457.200876        | 896.367927         | 448.687602        | 895.383911         | 448.195594        | 8  |
| 8  | <b>975.398892</b>  | 488.203084      | 958.372343        | 479.689810        | <b>957.388327</b>  | 479.197802        | C    | <b>784.351883</b>  | 392.679580        | 767.325334         | 384.166305        | 766.341318         | 383.674297        | 7  |
| 9  | 1072.451656        | 536.729466      | 1055.425107       | 528.216192        | 1054.441091        | 527.724184        | P    | <b>624.321234</b>  | <b>312.664255</b> | 607.294685         | 304.150981        | <b>606.310669</b>  | 303.658973        | 6  |
| 10 | <b>1143.488770</b> | 572.248023      | 1126.462221       | 563.734749        | 1125.478205        | 563.242741        | A    | 527.268470         | 264.137873        | 510.241921         | 255.624598        | 509.257905         | 255.132590        | 5  |
| 11 | <b>1200.510234</b> | 600.758755      | 1183.483685       | 592.245481        | 1182.499669        | 591.753473        | G    | <b>456.231356</b>  | 228.619316        | 439.204807         | 220.106041        | 438.220791         | 219.614033        | 4  |
| 12 | <b>1287.542262</b> | 644.274769      | 1270.515713       | 635.761495        | 1269.531697        | 635.269487        | S    | <b>399.209892</b>  | 200.108584        | 382.183343         | 191.595309        | 381.199327         | 191.103301        | 3  |
| 13 | <b>1424.601174</b> | 712.804225      | 1407.574625       | 704.290951        | <b>1406.590609</b> | 703.798943        | H    | <b>312.177864</b>  | 156.592570        | 295.151315         | 148.079295        |                    |                   | 2  |
| 14 |                    |                 |                   |                   |                    |                   | R    | 175.118952         | 88.063114         | 158.092403         | 79.549839         |                    |                   | 1  |

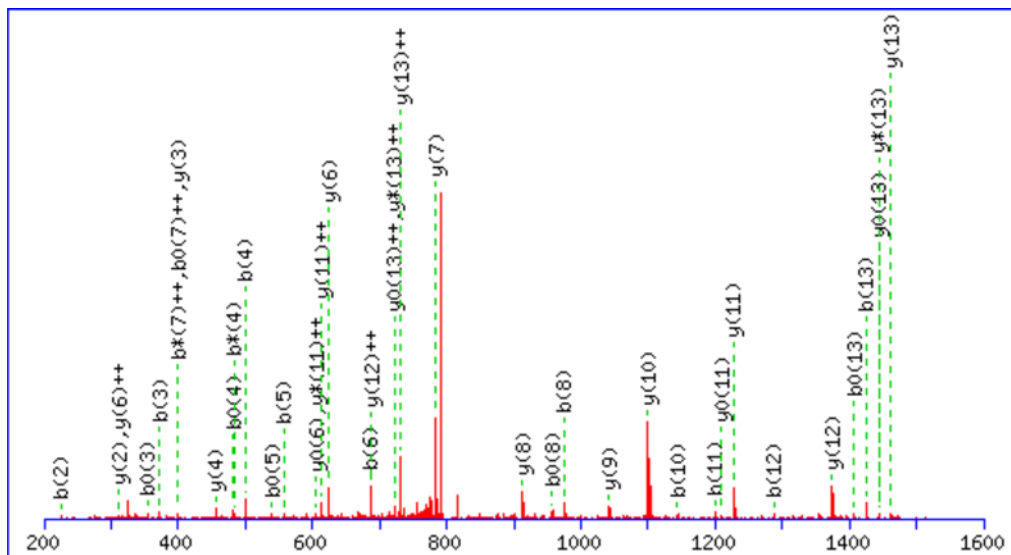

## Peptide View

MS/MS Fragmentation of **NPVLQQDAHSSVTITPQR**

Found in **IPI00410488**, Tax\_Id=9606 Gene\_Symbol=CD276 Isoform 1 of CD276 antigen

**Experiment:** 25 - NOPD1 **Fraction:** NOPD1

Match to Query 13993: 1990.024448 from(996.019500,2+)

Title: OECHL100310\_33.9859.9859.2.dta

Data file \\BOROMIR\Masse\Data LTQ-Orbitrap\Chrystelle Lacroix\Etude clinique sJPU\OECHL100310\_33.raw

**Monoisotopic mass of neutral peptide Mr(calc):** 1990.023209 **Fixed modifications:** Carbamidomethyl (C) (apply to specified residues or termini only) **Ions Score:** 77

**Expect:** 2.8e-006 **Matches :** 30/186 fragment ions using 48 most intense peaks ([help](#))

| # | b                 | b <sup>++</sup> | b*                | b* <sup>++</sup> | b <sup>0</sup> | b <sup>0++</sup> | Seq. | y                  | y <sup>++</sup>   | y*          | y* <sup>++</sup>  | y <sup>0</sup> | y <sup>0++</sup>  | #  |
|---|-------------------|-----------------|-------------------|------------------|----------------|------------------|------|--------------------|-------------------|-------------|-------------------|----------------|-------------------|----|
| 1 | 115.050203        | 58.028740       | 98.023654         | 49.515465        |                |                  | N    |                    |                   |             |                   |                |                   | 18 |
| 2 | 212.102967        | 106.555121      | 195.076418        | 98.041847        |                |                  | P    | 1876.987553        | 938.997415        | 1859.961004 | 930.484140        | 1858.976988    | 929.992132        | 17 |
| 3 | <b>311.171381</b> | 156.089328      | 294.144832        | 147.576054       |                |                  | V    | 1779.934789        | <b>890.471033</b> | 1762.908240 | 881.957758        | 1761.924224    | 881.465750        | 16 |
| 4 | <b>424.255445</b> | 212.631361      | 407.228896        | 204.118086       |                |                  | L    | <b>1680.866375</b> | <b>840.936826</b> | 1663.839826 | 832.423551        | 1662.855810    | 831.931543        | 15 |
| 5 | <b>552.314023</b> | 276.660650      | 535.287474        | 268.147375       |                |                  | Q    | <b>1567.782311</b> | 784.394794        | 1550.755762 | <b>775.881519</b> | 1549.771746    | <b>775.389511</b> | 14 |
| 6 | 680.372601        | 340.689939      | <b>663.346052</b> | 332.176664       |                |                  | Q    | <b>1439.723733</b> | 720.365505        | 1422.697184 | 711.852230        | 1421.713168    | 711.360222        | 13 |

|    |                    |                   |                    |            |                    |                   |          |                    |            |             |            |             |            |           |
|----|--------------------|-------------------|--------------------|------------|--------------------|-------------------|----------|--------------------|------------|-------------|------------|-------------|------------|-----------|
| 7  | <b>795.399544</b>  | 398.203410        | 778.372995         | 389.690136 | 777.388979         | 389.198128        | <b>D</b> | <b>1311.665155</b> | 656.336215 | 1294.638606 | 647.822941 | 1293.654590 | 647.330933 | <b>12</b> |
| 8  | 866.436658         | 433.721967        | 849.410109         | 425.208693 | 848.426093         | <b>424.716685</b> | <b>A</b> | <b>1196.638212</b> | 598.822744 | 1179.611663 | 590.309470 | 1178.627647 | 589.817462 | <b>11</b> |
| 9  | 1003.495570        | <b>502.251423</b> | 986.469021         | 493.738149 | 985.485005         | 493.246141        | <b>H</b> | <b>1125.601098</b> | 563.304187 | 1108.574549 | 554.790913 | 1107.590533 | 554.298905 | <b>10</b> |
| 10 | <b>1090.527598</b> | 545.767437        | 1073.501049        | 537.254163 | 1072.517033        | 536.762155        | <b>S</b> | <b>988.542186</b>  | 494.774731 | 971.515637  | 486.261457 | 970.531621  | 485.769449 | <b>9</b>  |
| 11 | 1177.559626        | 589.283451        | 1160.533077        | 580.770177 | 1159.549061        | 580.278169        | <b>S</b> | <b>901.510158</b>  | 451.258717 | 884.483609  | 442.745443 | 883.499593  | 442.253435 | <b>8</b>  |
| 12 | 1276.628040        | 638.817658        | 1259.601491        | 630.304384 | 1258.617475        | 629.812376        | <b>V</b> | 814.478130         | 407.742703 | 797.451581  | 399.229428 | 796.467565  | 398.737420 | <b>7</b>  |
| 13 | 1377.675719        | 689.341498        | 1360.649170        | 680.828223 | <b>1359.665154</b> | 680.336215        | <b>T</b> | <b>715.409716</b>  | 358.208496 | 698.383167  | 349.695221 | 697.399151  | 349.203213 | <b>6</b>  |
| 14 | <b>1490.759783</b> | 745.883530        | <b>1473.733234</b> | 737.370255 | <b>1472.749218</b> | 736.878247        | <b>I</b> | <b>614.362037</b>  | 307.684656 | 597.335488  | 299.171382 | 596.351472  | 298.679374 | <b>5</b>  |
| 15 | <b>1591.807462</b> | 796.407369        | 1574.780913        | 787.894095 | 1573.796897        | 787.402087        | <b>T</b> | <b>501.277973</b>  | 251.142624 | 484.251424  | 242.629350 | 483.267408  | 242.137342 | <b>4</b>  |
| 16 | 1688.860226        | 844.933751        | 1671.833677        | 836.420477 | 1670.849661        | 835.928469        | <b>P</b> | <b>400.230294</b>  | 200.618785 | 383.203745  | 192.105510 |             |            | <b>3</b>  |
| 17 | <b>1816.918804</b> | 908.963040        | 1799.892255        | 900.449766 | 1798.908239        | 899.957758        | <b>Q</b> | 303.177530         | 152.092403 | 286.150981  | 143.579128 |             |            | <b>2</b>  |
| 18 |                    |                   |                    |            |                    |                   | <b>R</b> | 175.118952         | 88.063114  | 158.092403  | 79.549839  |             |            | <b>1</b>  |

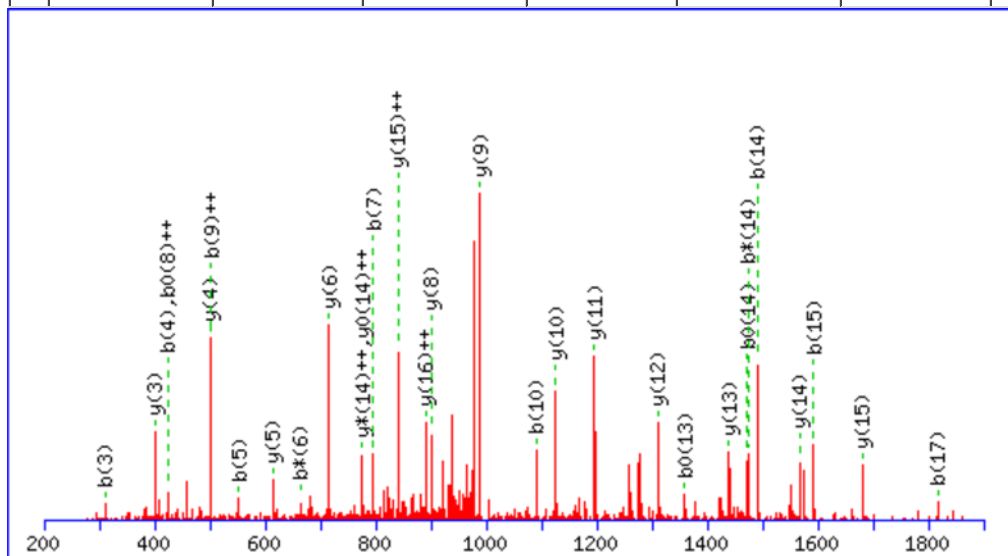

## Peptide View

MS/MS Fragmentation of **KAGPCEQAGSPCR**

Found in **IPI00028381**, Tax\_Id=9606 Gene\_Symbol=DLK2 Isoform 1 of Protein delta homolog 2

Experiment: 25 - NOPD1 Fraction: NOPD1

Match to Query 8945: 1416.624248 from(709.319400,2+)

Title: OECHL100310\_33.1970.1970.2.dta

Data file \\BOROMIR\Masse\Data LTQ-Orbitrap\Chrystelle Lacroix\Etude clinique sJPU\OECHL100310\_33.raw

**Monoisotopic mass of neutral peptide Mr(calc):** 1416.623810**Fixed modifications:** Carbamidomethyl (C) (apply to specified residues or termini only)**Ions Score:** 88**Expect:** 1.1e-007**Matches :** 22/128 fragment ions using 36 most intense peaks ([help](#))

| #  | b           | b <sup>++</sup> | b*          | b <sup>*++</sup> | b <sup>0</sup> | b <sup>0++</sup> | Seq. | y           | y <sup>++</sup> | y*          | y <sup>*++</sup> | y <sup>0</sup> | y <sup>0++</sup> | #  |
|----|-------------|-----------------|-------------|------------------|----------------|------------------|------|-------------|-----------------|-------------|------------------|----------------|------------------|----|
| 1  | 129.102239  | 65.054757       | 112.075690  | 56.541483        |                |                  | K    |             |                 |             |                  |                |                  | 13 |
| 2  | 200.139353  | 100.573315      | 183.112804  | 92.060040        |                |                  | A    | 1289.536133 | 645.271705      | 1272.509584 | 636.758430       | 1271.525568    | 636.266422       | 12 |
| 3  | 257.160817  | 129.084047      | 240.134268  | 120.570772       |                |                  | G    | 1218.499019 | 609.753148      | 1201.472470 | 601.239873       | 1200.488454    | 600.747865       | 11 |
| 4  | 354.213581  | 177.610429      | 337.187032  | 169.097154       |                |                  | P    | 1161.477555 | 581.242416      | 1144.451006 | 572.729141       | 1143.466990    | 572.237133       | 10 |
| 5  | 514.244230  | 257.625753      | 497.217681  | 249.112479       |                |                  | C    | 1064.424791 | 532.716034      | 1047.398242 | 524.202759       | 1046.414226    | 523.710751       | 9  |
| 6  | 643.286823  | 322.147050      | 626.260274  | 313.633775       | 625.276258     | 313.141767       | E    | 904.394142  | 452.700709      | 887.367593  | 444.187434       | 886.383577     | 443.695427       | 8  |
| 7  | 771.345401  | 386.176339      | 754.318852  | 377.663064       | 753.334836     | 377.171056       | Q    | 775.351549  | 388.179413      | 758.325000  | 379.666138       | 757.340984     | 379.174130       | 7  |
| 8  | 842.382515  | 421.694896      | 825.355966  | 413.181621       | 824.371950     | 412.689613       | A    | 647.292971  | 324.150124      | 630.266422  | 315.636849       | 629.282406     | 315.144841       | 6  |
| 9  | 899.403979  | 450.205628      | 882.377430  | 441.692353       | 881.393414     | 441.200345       | G    | 576.255857  | 288.631567      | 559.229308  | 280.118292       | 558.245292     | 279.626284       | 5  |
| 10 | 986.436007  | 493.721642      | 969.409458  | 485.208367       | 968.425442     | 484.716359       | S    | 519.234393  | 260.120835      | 502.207844  | 251.607560       | 501.223828     | 251.115552       | 4  |
| 11 | 1083.488771 | 542.248024      | 1066.462222 | 533.734749       | 1065.478206    | 533.242741       | P    | 432.202365  | 216.604820      | 415.175816  | 208.091546       |                |                  | 3  |
| 12 | 1243.519420 | 622.263348      | 1226.492871 | 613.750074       | 1225.508855    | 613.258066       | C    | 335.149601  | 168.078438      | 318.123052  | 159.565164       |                |                  | 2  |
| 13 |             |                 |             |                  |                |                  | R    | 175.118952  | 88.063114       | 158.092403  | 79.549839        |                |                  | 1  |

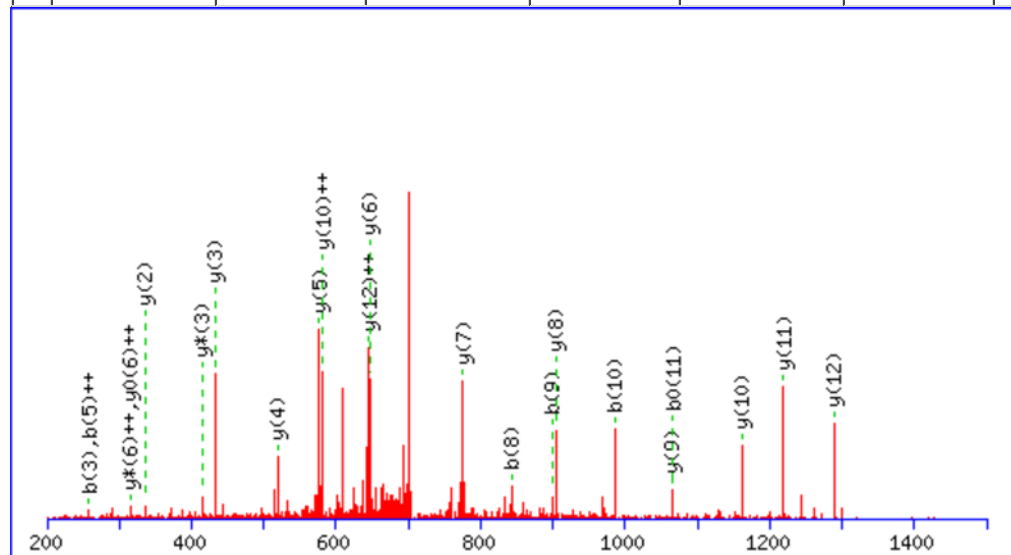



## Peptide View

MS/MS Fragmentation of **DTDTGALLFIGK**

Found in **IP100006114**, Tax\_Id=9606 Gene\_Symbol=SERPINF1 Pigment epithelium-derived factor

**Experiment:** 25 - NOPD1 **Fraction:** NOPD1

Match to Query 6757: 1249.654248 from(625.834400,2+)

Title: OECHL100310\_33.17588.17588.2.dta

Data file \\BOROMIR\Masse\Data LTQ-Orbitrap\Chrystelle Lacroix\Etude clinique sJPU\OECHL100310\_33.raw

**Monoisotopic mass of neutral peptide Mr(calc):** 1249.655426 **Fixed modifications:** Carbamidomethyl (C) (apply to specified residues or termini only) **Ions Score:** 84

**Expect:** 3.4e-007 **Matches :** 18/94 fragment ions using 22 most intense peaks ([help](#))

| #  | b                  | b <sup>++</sup>   | b <sup>0</sup> | b <sup>0++</sup>  | Seq. | y                  | y <sup>++</sup>   | y*          | y <sup>*++</sup> | y <sup>0</sup> | y <sup>0++</sup> | #  |
|----|--------------------|-------------------|----------------|-------------------|------|--------------------|-------------------|-------------|------------------|----------------|------------------|----|
| 1  | 116.034219         | 58.520748         | 98.023654      | 49.515465         | D    |                    |                   |             |                  |                |                  | 12 |
| 2  | <b>217.081898</b>  | 109.044587        | 199.071333     | 100.039304        | T    | 1135.635753        | 568.321514        | 1118.609204 | 559.808240       | 1117.625188    | 559.316232       | 11 |
| 3  | 332.108841         | 166.558058        | 314.098276     | 157.552776        | D    | <b>1034.588074</b> | 517.797675        | 1017.561525 | 509.284401       | 1016.577509    | 508.792393       | 10 |
| 4  | 433.156520         | <b>217.081898</b> | 415.145955     | 208.076616        | T    | <b>919.561131</b>  | 460.284203        | 902.534582  | 451.770929       | 901.550566     | 451.278921       | 9  |
| 5  | 490.177984         | 245.592630        | 472.167419     | 236.587347        | G    | <b>818.513452</b>  | 409.760364        | 801.486903  | 401.247089       |                |                  | 8  |
| 6  | <b>561.215098</b>  | 281.111187        | 543.204533     | 272.105905        | A    | <b>761.491988</b>  | 381.249632        | 744.465439  | 372.736357       |                |                  | 7  |
| 7  | 674.299162         | 337.653219        | 656.288597     | 328.647937        | L    | <b>690.454874</b>  | <b>345.731075</b> | 673.428325  | 337.217800       |                |                  | 6  |
| 8  | <b>787.383226</b>  | 394.195251        | 769.372661     | <b>385.189969</b> | L    | <b>577.370810</b>  | 289.189043        | 560.344261  | 280.675768       |                |                  | 5  |
| 9  | <b>934.451640</b>  | 467.729458        | 916.441075     | 458.724176        | F    | <b>464.286746</b>  | 232.647011        | 447.260197  | 224.133736       |                |                  | 4  |
| 10 | <b>1047.535704</b> | 524.271490        | 1029.525139    | 515.266207        | I    | <b>317.218332</b>  | 159.112804        | 300.191783  | 150.599529       |                |                  | 3  |
| 11 | <b>1104.557168</b> | 552.782222        | 1086.546603    | 543.776939        | G    | <b>204.134268</b>  | 102.570772        | 187.107719  | 94.057497        |                |                  | 2  |
| 12 |                    |                   |                |                   | K    | 147.112804         | 74.060040         | 130.086255  | 65.546765        |                |                  | 1  |

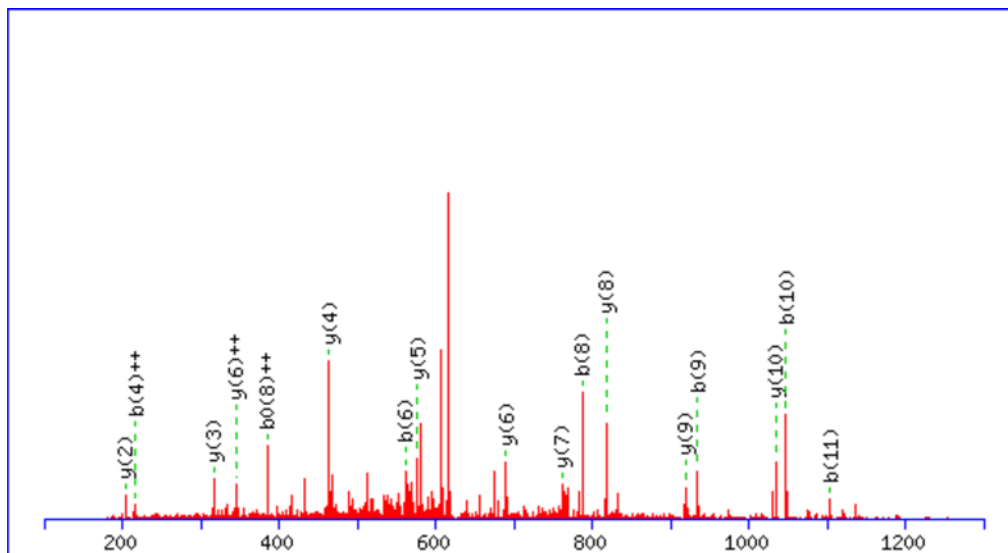

## Peptide View

MS/MS Fragmentation of **YSGSEGSTQTLTKGELK**

Found in **IPI00017526**, Tax\_Id=9606 Gene\_Symbol=S100P Protein S100-P

**Experiment:** 25 - NOPD1 **Fraction:** NOPD1

Match to Query 12757: 1784.882648 from(893.448600,2+)

Title: OECHL100310\_33.7708.7708.2.dta

Data file \\BOROMIR\Masse\Data LTQ-Orbitrap\Chrystelle Lacroix\Etude clinique sJPU\OECHL100310\_33.raw

**Monoisotopic mass of neutral peptide Mr(calc):** 1784.879211 **Fixed modifications:** Carbamidomethyl (C) (apply to specified residues or termini only) **Ions Score:** 81

**Expect:** 1.2e-006 **Matches :** 26/170 fragment ions using 45 most intense peaks ([help](#))

| # | b          | b <sup>++</sup> | b <sup>*</sup> | b <sup>*++</sup> | b <sup>0</sup> | b <sup>0++</sup> | Seq. | y                  | y <sup>++</sup>   | y <sup>*</sup> | y <sup>*++</sup> | y <sup>0</sup>     | y <sup>0++</sup> | #  |
|---|------------|-----------------|----------------|------------------|----------------|------------------|------|--------------------|-------------------|----------------|------------------|--------------------|------------------|----|
| 1 | 164.070605 | 82.538940       |                |                  |                |                  | Y    |                    |                   |                |                  |                    |                  | 17 |
| 2 | 251.102633 | 126.054954      |                |                  | 233.092068     | 117.049672       | S    | <b>1622.823172</b> | 811.915224        | 1605.796623    | 803.401950       | 1604.812607        | 802.909941       | 16 |
| 3 | 308.124097 | 154.565687      |                |                  | 290.113532     | 145.560404       | G    | <b>1535.791144</b> | <b>768.399210</b> | 1518.764595    | 759.885936       | 1517.780579        | 759.393928       | 15 |
| 4 | 395.156125 | 198.081701      |                |                  | 377.145560     | 189.076418       | S    | 1478.769680        | <b>739.888478</b> | 1461.743131    | 731.375204       | 1460.759115        | 730.883195       | 14 |
| 5 | 524.198718 | 262.602997      |                |                  | 506.188153     | 253.597715       | E    | <b>1391.737652</b> | 696.372464        | 1374.711103    | 687.859190       | 1373.727087        | 687.367182       | 13 |
| 6 | 581.220182 | 291.113729      |                |                  | 563.209617     | 282.108447       | G    | <b>1262.695059</b> | <b>631.851167</b> | 1245.668510    | 623.337893       | <b>1244.684494</b> | 622.845885       | 12 |

|    |                    |            |                    |            |             |            |   |                    |            |                    |                   |                   |                   |    |
|----|--------------------|------------|--------------------|------------|-------------|------------|---|--------------------|------------|--------------------|-------------------|-------------------|-------------------|----|
| 7  | 668.252210         | 334.629743 |                    |            | 650.241645  | 325.624461 | S | <b>1205.673595</b> | 603.340436 | 1188.647046        | 594.827161        | 1187.663030       | 594.335153        | 11 |
| 8  | 769.299889         | 385.153583 |                    |            | 751.289324  | 376.148300 | T | <b>1118.641567</b> | 559.824421 | 1101.615018        | 551.311147        | 1100.631002       | 550.819139        | 10 |
| 9  | 897.358467         | 449.182872 | 880.331918         | 440.669597 | 879.347902  | 440.177589 | Q | <b>1017.593888</b> | 509.300582 | <b>1000.567339</b> | 500.787307        | <b>999.583323</b> | 500.295299        | 9  |
| 10 | 998.406146         | 499.706711 | 981.379597         | 491.193437 | 980.395581  | 490.701429 | T | 889.535310         | 445.271293 | 872.508761         | <b>436.758018</b> | <b>871.524745</b> | <b>436.266010</b> | 8  |
| 11 | 1111.490210        | 556.248743 | 1094.463661        | 547.735469 | 1093.479645 | 547.243461 | L | <b>788.487631</b>  | 394.747453 | 771.461082         | 386.234179        | 770.477066        | 385.742171        | 7  |
| 12 | 1212.537889        | 606.772583 | 1195.511340        | 598.259308 | 1194.527324 | 597.767300 | T | <b>675.403567</b>  | 338.205421 | 658.377018         | 329.692147        | 657.393002        | 329.200139        | 6  |
| 13 | <b>1340.632852</b> | 670.820064 | 1323.606303        | 662.306790 | 1322.622287 | 661.814782 | K | <b>574.355888</b>  | 287.681582 | 557.329339         | 279.168307        | 556.345323        | 278.676299        | 5  |
| 14 | <b>1397.654316</b> | 699.330796 | 1380.627767        | 690.817522 | 1379.643751 | 690.325514 | G | <b>446.260925</b>  | 223.634100 | 429.234376         | 215.120826        | 428.250360        | 214.628818        | 4  |
| 15 | <b>1526.696909</b> | 763.852093 | 1509.670360        | 755.338818 | 1508.686344 | 754.846810 | E | 389.239461         | 195.123368 | 372.212912         | 186.610094        | 371.228896        | 186.118086        | 3  |
| 16 | <b>1639.780973</b> | 820.394124 | <b>1622.754424</b> | 811.880850 | 1621.770408 | 811.388842 | L | <b>260.196868</b>  | 130.602072 | 243.170319         | 122.088797        |                   |                   | 2  |
| 17 |                    |            |                    |            |             |            | K | 147.112804         | 74.060040  | 130.086255         | 65.546765         |                   |                   | 1  |

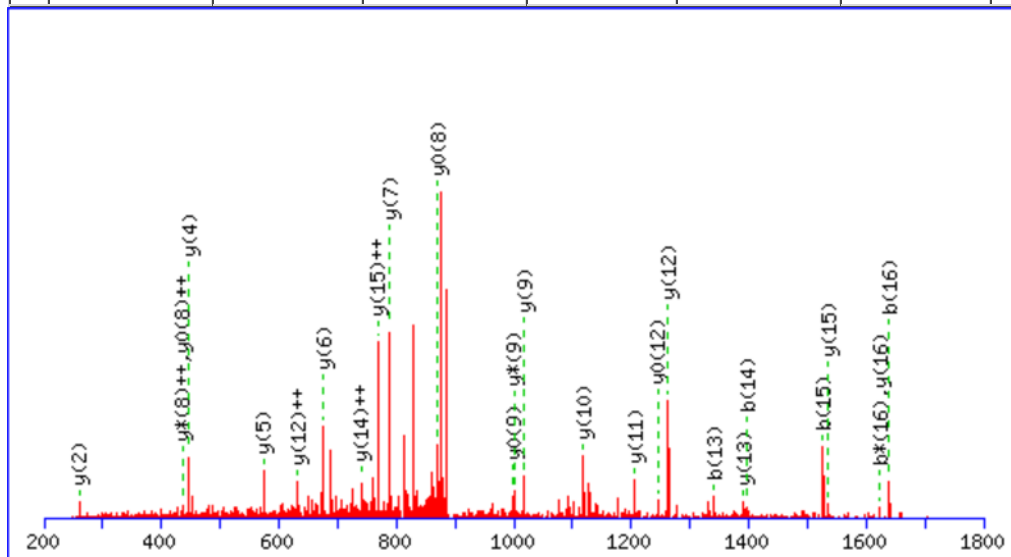

## Peptide View

MS/MS Fragmentation of **AHGQESAI FNEVAPGYFSR**

Found in **IP100170635**, Tax\_Id=9606 Gene\_Symbol=SECTM1 Secreted and transmembrane protein 1

Experiment: 25 - NOPD1 Fraction: NOPD1

Match to Query 14431: 2078.983448 from(1040.499000,2+)

Title: OECHL100310\_33.17106.17106.2.dta

Data file \\BOROMIR\Masse\Data LTQ-Orbitrap\Chrystelle Lacroix\Etude clinique sJPU\OECHL100310\_33.raw

**Monoisotopic mass of neutral peptide Mr(calc):** 2078.980988**Fixed modifications:** Carbamidomethyl (C) (apply to specified residues or termini only)**Ions Score:** 76**Expect:** 4.1e-006**Matches :** 29/200 fragment ions using 50 most intense peaks ([help](#))

| #  | b                  | b <sup>++</sup>   | b*                | b <sup>+++</sup> | b <sup>0</sup> | b <sup>0++</sup> | Seq. | y                  | y <sup>++</sup> | y*                 | y <sup>+++</sup>  | y <sup>0</sup> | y <sup>0++</sup>  | #  |
|----|--------------------|-------------------|-------------------|------------------|----------------|------------------|------|--------------------|-----------------|--------------------|-------------------|----------------|-------------------|----|
| 1  | 72.044390          | 36.525833         |                   |                  |                |                  | A    |                    |                 |                    |                   |                |                   | 19 |
| 2  | 209.103302         | 105.055289        |                   |                  |                |                  | H    | 2008.951166        | 1004.979221     | 1991.924617        | 996.465947        | 1990.940601    | 995.973939        | 18 |
| 3  | 266.124766         | 133.566021        |                   |                  |                |                  | G    | <b>1871.892254</b> | 936.449765      | 1854.865705        | 927.936491        | 1853.881689    | 927.444483        | 17 |
| 4  | 394.183344         | 197.595310        | 377.156795        | 189.082035       |                |                  | Q    | 1814.870790        | 907.939033      | 1797.844241        | 899.425759        | 1796.860225    | 898.933751        | 16 |
| 5  | <b>523.225937</b>  | 262.116607        | 506.199388        | 253.603332       | 505.215372     | 253.111324       | E    | <b>1686.812212</b> | 843.909744      | 1669.785663        | 835.396470        | 1668.801647    | 834.904462        | 15 |
| 6  | <b>610.257965</b>  | 305.632621        | <b>593.231416</b> | 297.119346       | 592.247400     | 296.627338       | S    | <b>1557.769619</b> | 779.388448      | <b>1540.743070</b> | 770.875173        | 1539.759054    | 770.383165        | 14 |
| 7  | <b>681.295079</b>  | 341.151178        | <b>664.268530</b> | 332.637903       | 663.284514     | 332.145895       | A    | <b>1470.737591</b> | 735.872434      | 1453.711042        | <b>727.359159</b> | 1452.727026    | <b>726.867151</b> | 13 |
| 8  | <b>794.379143</b>  | 397.693210        | 777.352594        | 389.179935       | 776.368578     | 388.687927       | I    | <b>1399.700477</b> | 700.353877      | 1382.673928        | 691.840602        | 1381.689912    | 691.348594        | 12 |
| 9  | <b>941.447557</b>  | 471.227417        | 924.421008        | 462.714142       | 923.436992     | 462.222134       | F    | <b>1286.616413</b> | 643.811845      | 1269.589864        | 635.298570        | 1268.605848    | 634.806562        | 11 |
| 10 | 1055.490484        | 528.248880        | 1038.463935       | 519.735606       | 1037.479919    | 519.243597       | N    | <b>1139.547999</b> | 570.277638      | 1122.521450        | 561.764363        | 1121.537434    | 561.272355        | 10 |
| 11 | 1184.533077        | <b>592.770176</b> | 1167.506528       | 584.256902       | 1166.522512    | 583.764894       | E    | 1025.505072        | 513.256174      | 1008.478523        | 504.742900        | 1007.494507    | 504.250892        | 9  |
| 12 | <b>1283.601491</b> | 642.304383        | 1266.574942       | 633.791109       | 1265.590926    | 633.299101       | V    | <b>896.462479</b>  | 448.734878      | 879.435930         | <b>440.221603</b> | 878.451914     | 439.729595        | 8  |
| 13 | <b>1354.638605</b> | 677.822940        | 1337.612056       | 669.309666       | 1336.628040    | 668.817658       | A    | <b>797.394065</b>  | 399.200671      | 780.367516         | 390.687396        | 779.383500     | 390.195388        | 7  |
| 14 | 1451.691369        | <b>726.349322</b> | 1434.664820       | 717.836048       | 1433.680804    | 717.344040       | P    | <b>726.356951</b>  | 363.682114      | 709.330402         | 355.168839        | 708.346386     | 354.676831        | 6  |
| 15 | 1508.712833        | 754.860054        | 1491.686284       | 746.346780       | 1490.702268    | 745.854772       | G    | 629.304187         | 315.155732      | 612.277638         | 306.642457        | 611.293622     | 306.150449        | 5  |
| 16 | <b>1671.776162</b> | 836.391719        | 1654.749613       | 827.878445       | 1653.765597    | 827.386436       | Y    | <b>572.282723</b>  | 286.645000      | 555.256174         | 278.131725        | 554.272158     | 277.639717        | 4  |
| 17 | 1818.844576        | 909.925926        | 1801.818027       | 901.412652       | 1800.834011    | 900.920643       | F    | <b>409.219394</b>  | 205.113335      | 392.192845         | 196.600061        | 391.208829     | 196.108053        | 3  |
| 18 | <b>1905.876604</b> | 953.441940        | 1888.850055       | 944.928666       | 1887.866039    | 944.436658       | S    | 262.150980         | 131.579128      | 245.124431         | 123.065854        | 244.140415     | 122.573846        | 2  |
| 19 |                    |                   |                   |                  |                |                  | R    | 175.118952         | 88.063114       | 158.092403         | 79.549840         |                |                   | 1  |

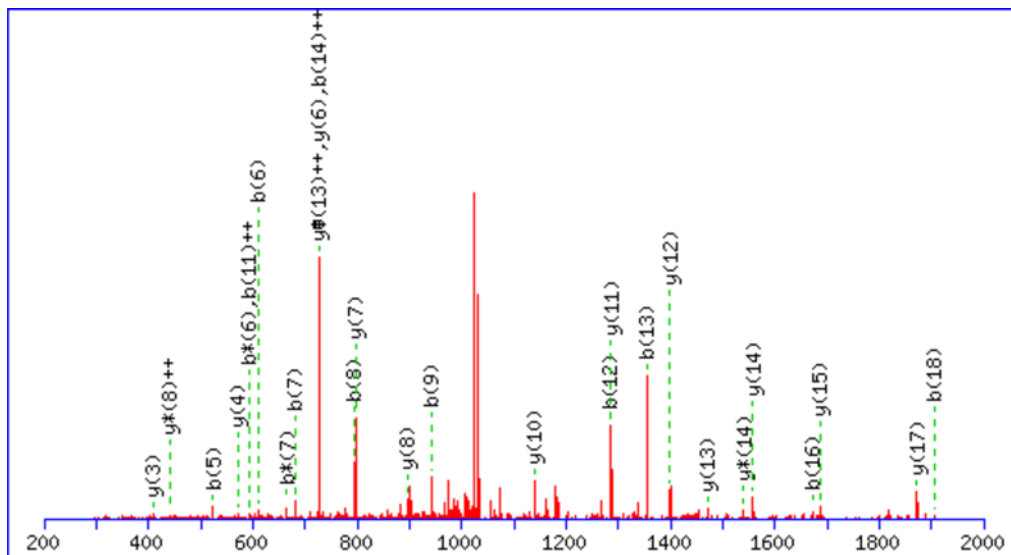

## Peptide View

MS/MS Fragmentation of **TVAGPVGGSLSVQCPYEKEHR**

Found in **IPI00414784**, Tax\_Id=9606 Gene\_Symbol=CD300A Isoform 1 of CMRF35-like molecule 8

**Experiment:** 25 - NOPD1 **Fraction:** NOPD1

Match to Query 15120: 2270.113448 from(1136.064000,2+)

Title: OECHL100310\_33.10563.10563.2.dta

Data file \\BOROMIR\Masse\Data LTQ-Orbitrap\Chrystelle Lacroix\Etude clinique sJPU\OECHL100310\_33.raw

**Monoisotopic mass of neutral peptide Mr(calc):** 2270.111374 **Fixed modifications:** Carbamidomethyl (C) (apply to specified residues or termini only) **Ions Score:** 72

**Expect:** 1.1e-005 **Matches :** 48/212 fragment ions using 102 most intense peaks ([help](#))

| # | b          | b <sup>++</sup> | b* | b* <sup>++</sup> | b <sup>0</sup> | b <sup>0</sup> <sup>++</sup> | Seq. | y           | y <sup>++</sup> | y*          | y* <sup>++</sup> | y <sup>0</sup> | y <sup>0</sup> <sup>++</sup> |
|---|------------|-----------------|----|------------------|----------------|------------------------------|------|-------------|-----------------|-------------|------------------|----------------|------------------------------|
| 1 | 102.054955 | 51.531116       |    |                  | 84.044390      | 42.525833                    | T    |             |                 |             |                  |                |                              |
| 2 | 201.123369 | 101.065322      |    |                  | 183.112804     | 92.060040                    | V    | 2170.070965 | 1085.539120     | 2153.044416 | 1077.025846      | 2152.060400    | 1076.5338                    |
| 3 | 272.160483 | 136.583879      |    |                  | 254.149918     | 127.578597                   | A    | 2071.002551 | 1036.004913     | 2053.976002 | 1027.491639      | 2052.991986    | 1026.9996                    |
| 4 | 329.181947 | 165.094611      |    |                  | 311.171382     | 156.089329                   | G    | 1999.965437 | 1000.486357     | 1982.938888 | 991.973082       | 1981.954872    | 991.4810                     |
| 5 | 426.234711 | 213.620994      |    |                  | 408.224146     | 204.615711                   | P    | 1942.943973 | 971.975625      | 1925.917424 | 963.462350       | 1924.933408    | 962.9703                     |
| 6 | 525.303125 | 263.155201      |    |                  | 507.292560     | 254.149918                   | V    | 1845.891209 | 923.449243      | 1828.864660 | 914.935968       | 1827.880644    | 914.4439                     |

|    |                    |                   |                    |             |             |             |   |             |            |             |            |             |          |
|----|--------------------|-------------------|--------------------|-------------|-------------|-------------|---|-------------|------------|-------------|------------|-------------|----------|
| 7  | 582.324589         | 291.665933        |                    |             | 564.314024  | 282.660650  | G | 1746.822795 | 873.915036 | 1729.796246 | 865.401761 | 1728.812230 | 864.9097 |
| 8  | 639.346053         | 320.176665        |                    |             | 621.335488  | 311.171382  | G | 1689.801331 | 845.404304 | 1672.774782 | 836.891029 | 1671.790766 | 836.3990 |
| 9  | <b>726.378081</b>  | 363.692679        |                    |             | 708.367516  | 354.687396  | S | 1632.779867 | 816.893572 | 1615.753318 | 808.380297 | 1614.769302 | 807.8882 |
| 10 | 839.462145         | 420.234711        |                    |             | 821.451580  | 411.229428  | L | 1545.747839 | 773.377558 | 1528.721290 | 764.864283 | 1527.737274 | 764.3722 |
| 11 | 926.494173         | 463.750725        |                    |             | 908.483608  | 454.745442  | S | 1432.663775 | 716.835526 | 1415.637226 | 708.322251 | 1414.653210 | 707.8302 |
| 12 | 1025.562587        | 513.284932        |                    |             | 1007.552022 | 504.279649  | V | 1345.631747 | 673.319512 | 1328.605198 | 664.806237 | 1327.621182 | 664.3142 |
| 13 | <b>1153.621165</b> | <b>577.314221</b> | 1136.594616        | 568.800946  | 1135.610600 | 568.308938  | Q | 1246.563333 | 623.785305 | 1229.536784 | 615.272030 | 1228.552768 | 614.7800 |
| 14 | 1313.651814        | 657.329545        | <b>1296.625265</b> | 648.816271  | 1295.641249 | 648.324263  | C | 1118.504755 | 559.756016 | 1101.478206 | 551.242741 | 1100.494190 | 550.7507 |
| 15 | 1410.704578        | 705.855927        | 1393.678029        | 697.342653  | 1392.694013 | 696.850645  | P | 958.474106  | 479.740691 | 941.447557  | 471.227417 | 940.463541  | 470.7354 |
| 16 | 1573.767907        | 787.387592        | 1556.741358        | 778.874317  | 1555.757342 | 778.382309  | Y | 861.421342  | 431.214309 | 844.394793  | 422.701035 | 843.410777  | 422.2090 |
| 17 | 1702.810500        | 851.908888        | 1685.783951        | 843.395614  | 1684.799935 | 842.903606  | E | 698.358013  | 349.682645 | 681.331464  | 341.169370 | 680.347448  | 340.6773 |
| 18 | <b>1830.905463</b> | 915.956370        | 1813.878914        | 907.443095  | 1812.894898 | 906.951087  | K | 569.315420  | 285.161348 | 552.288871  | 276.648074 | 551.304855  | 276.1560 |
| 19 | <b>1959.948056</b> | 980.477666        | 1942.921507        | 971.964392  | 1941.937491 | 971.472384  | E | 441.220457  | 221.113867 | 424.193908  | 212.600592 | 423.209892  | 212.1085 |
| 20 | 2097.006968        | 1049.007122       | 2079.980419        | 1040.493847 | 2078.996403 | 1040.001840 | H | 312.177864  | 156.592570 | 295.151315  | 148.079295 |             |          |
| 21 |                    |                   |                    |             |             |             | R | 175.118952  | 88.063114  | 158.092403  | 79.549839  |             |          |

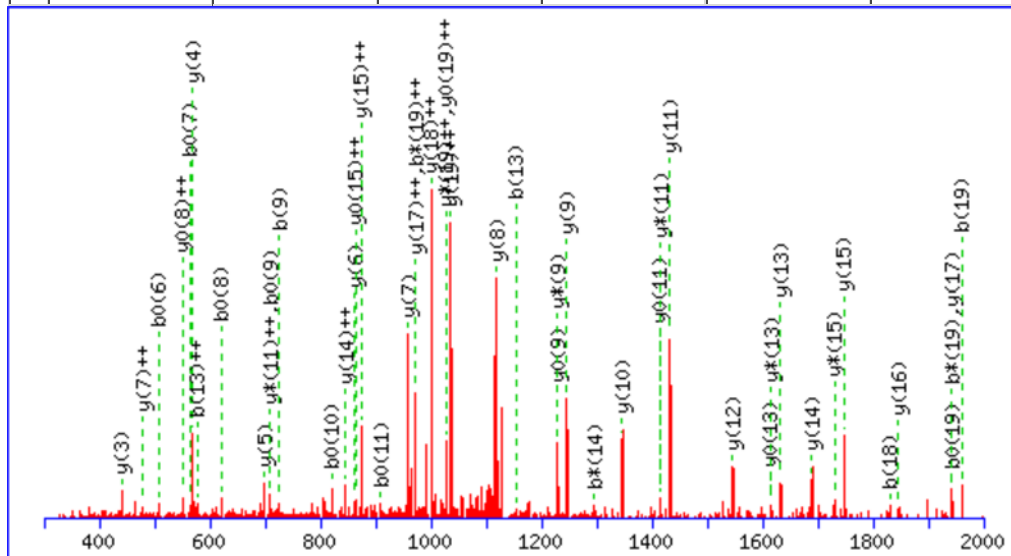

## Peptide View

MS/MS Fragmentation of **ITCAEEGWSPTPK**Found in **IPI00006154**, Tax\_Id=9606 Gene\_Symbol=CFHR2 Isoform Long of Complement factor H-related protein 2**Experiment:** 25 - NOPD1 **Fraction:** NOPD1

Match to Query 9685: 1474.676848 from(738.345700,2+)

Title: OECHL100310\_33.10337.10337.2.dta

Data file \\BOROMIR\Masse\Data LTQ-Orbitrap\Chrystelle Lacroix\Etude clinique sJPU\OECHL100310\_33.raw

**Monoisotopic mass of neutral peptide Mr(calc):** 1474.676224**Fixed modifications:** Carbamidomethyl (C) (apply to specified residues or termini only)**Ions Score:** 63**Expect:** 5e-005**Matches :** 35/114 fragment ions using 64 most intense peaks ([help](#))

| #  | b                  | b <sup>++</sup> | b <sup>0</sup>     | b <sup>0++</sup>  | Seq. | y                  | y <sup>++</sup>   | y <sup>*</sup>    | y <sup>*++</sup>  | y <sup>0</sup>     | y <sup>0++</sup>  | #  |
|----|--------------------|-----------------|--------------------|-------------------|------|--------------------|-------------------|-------------------|-------------------|--------------------|-------------------|----|
| 1  | 114.091340         | 57.549308       |                    |                   | I    |                    |                   |                   |                   |                    |                   | 13 |
| 2  | <b>215.139019</b>  | 108.073147      | 197.128454         | 99.067865         | T    | <b>1362.599444</b> | <b>681.803360</b> | 1345.572895       | 673.290086        | <b>1344.588879</b> | 672.798078        | 12 |
| 3  | 375.169668         | 188.088472      | <b>357.159103</b>  | 179.083190        | C    | <b>1261.551765</b> | <b>631.279521</b> | 1244.525216       | <b>622.766246</b> | 1243.541200        | <b>622.274238</b> | 11 |
| 4  | <b>446.206782</b>  | 223.607029      | 428.196217         | 214.601747        | A    | <b>1101.521116</b> | 551.264196        | 1084.494567       | 542.750922        | 1083.510551        | 542.258914        | 10 |
| 5  | <b>575.249375</b>  | 288.128326      | <b>557.238810</b>  | 279.123043        | E    | <b>1030.484002</b> | 515.745639        | 1013.457453       | 507.232365        | 1012.473437        | 506.740357        | 9  |
| 6  | <b>704.291968</b>  | 352.649622      | <b>686.281403</b>  | 343.644340        | E    | <b>901.441409</b>  | 451.224343        | <b>884.414860</b> | <b>442.711068</b> | 883.430844         | <b>442.219060</b> | 8  |
| 7  | 761.313432         | 381.160354      | 743.302867         | 372.155072        | G    | <b>772.398816</b>  | 386.703046        | 755.372267        | 378.189772        | 754.388251         | 377.697764        | 7  |
| 8  | <b>947.392745</b>  | 474.200011      | <b>929.382180</b>  | 465.194728        | W    | <b>715.377352</b>  | 358.192314        | 698.350803        | 349.679040        | 697.366787         | 349.187032        | 6  |
| 9  | <b>1034.424773</b> | 517.716025      | <b>1016.414208</b> | 508.710742        | S    | <b>529.298039</b>  | 265.152658        | 512.271490        | 256.639383        | 511.287474         | 256.147375        | 5  |
| 10 | 1131.477537        | 566.242407      | 1113.466972        | <b>557.237124</b> | P    | <b>442.266011</b>  | 221.636644        | 425.239462        | 213.123369        | <b>424.255446</b>  | 212.631361        | 4  |
| 11 | <b>1232.525216</b> | 616.766246      | <b>1214.514651</b> | 607.760964        | T    | <b>345.213247</b>  | 173.110262        | 328.186698        | 164.596987        | 327.202682         | 164.104979        | 3  |
| 12 | <b>1329.577980</b> | 665.292628      | 1311.567415        | 656.287346        | P    | <b>244.165568</b>  | 122.586422        | 227.139019        | 114.073148        |                    |                   | 2  |
| 13 |                    |                 |                    |                   | K    | 147.112804         | 74.060040         | 130.086255        | 65.546765         |                    |                   | 1  |

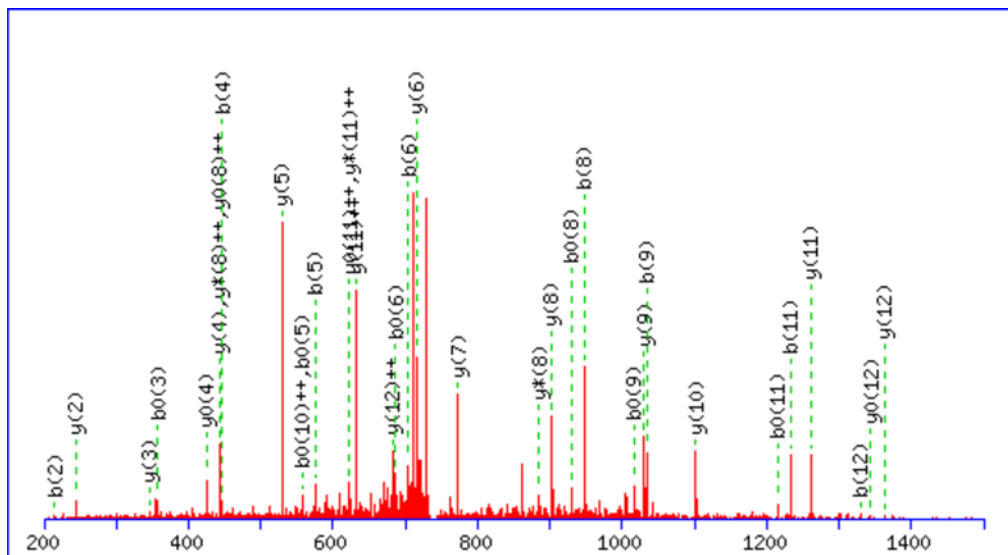

## Peptide View

MS/MS Fragmentation of **NHCGIASAASYPTV**

Found in **IPI00012887**, Tax\_Id=9606 Gene\_Symbol=CTSL1 Cathepsin L1

**Experiment:** 25 - NOPD1 **Fraction:** NOPD1

Match to Query 9301: 1446.656248 from(724.335400,2+)

Title: OECHL100310\_33.11819.11819.2.dta

Data file \\BOROMIR\Masse\Data LTQ-Orbitrap\Chrystelle Lacroix\Etude clinique sJPU\OECHL100310\_33.raw

**Monoisotopic mass of neutral peptide Mr(calc):** 1446.656158 **Fixed modifications:** Carbamidomethyl (C) (apply to specified residues or termini only) **Ions Score:** 51

**Expect:** 0.00065 **Matches :** 36/116 fragment ions using 74 most intense peaks ([help](#))

| # | b                 | b <sup>++</sup> | b*         | b* <sup>++</sup> | b <sup>0</sup> | b <sup>0++</sup> | Seq. | y                  | y <sup>++</sup> | y <sup>0</sup> | y <sup>0++</sup> | #  |
|---|-------------------|-----------------|------------|------------------|----------------|------------------|------|--------------------|-----------------|----------------|------------------|----|
| 1 | 115.050203        | 58.028740       | 98.023654  | 49.515465        |                |                  | N    |                    |                 |                |                  | 14 |
| 2 | <b>252.109115</b> | 126.558195      | 235.082566 | 118.044921       |                |                  | H    | <b>1333.620514</b> | 667.313895      | 1315.609949    | 658.308612       | 13 |
| 3 | 412.139764        | 206.573520      | 395.113215 | 198.060245       |                |                  | C    | 1196.561602        | 598.784439      | 1178.551037    | 589.779157       | 12 |
| 4 | <b>469.161228</b> | 235.084252      | 452.134679 | 226.570977       |                |                  | G    | <b>1036.530953</b> | 518.769115      | 1018.520388    | 509.763832       | 11 |
| 5 | <b>582.245292</b> | 291.626284      | 565.218743 | 283.113009       |                |                  | I    | <b>979.509489</b>  | 490.258383      | 961.498924     | 481.253100       | 10 |
| 6 | <b>653.282406</b> | 327.144841      | 636.255857 | 318.631566       |                |                  | A    | <b>866.425425</b>  | 433.716351      | 848.414860     | 424.711068       | 9  |



|    |             |            |             |            |             |            |   |            |            |            |            |   |
|----|-------------|------------|-------------|------------|-------------|------------|---|------------|------------|------------|------------|---|
| 7  | 740.314434  | 370.660855 | 723.287885  | 362.147580 | 722.303869  | 361.655572 | S | 795.388311 | 398.197794 | 777.377746 | 389.192511 | 8 |
| 8  | 811.351548  | 406.179412 | 794.324999  | 397.666137 | 793.340983  | 397.174129 | A | 708.356283 | 354.681780 | 690.345718 | 345.676497 | 7 |
| 9  | 882.388662  | 441.697969 | 865.362113  | 433.184694 | 864.378097  | 432.692686 | A | 637.319169 | 319.163223 | 619.308604 | 310.157940 | 6 |
| 10 | 969.420690  | 485.213983 | 952.394141  | 476.700708 | 951.410125  | 476.208700 | S | 566.282055 | 283.644666 | 548.271490 | 274.639383 | 5 |
| 11 | 1132.484019 | 566.745647 | 1115.457470 | 558.232373 | 1114.473454 | 557.740365 | Y | 479.250027 | 240.128652 | 461.239462 | 231.123369 | 4 |
| 12 | 1229.536783 | 615.272029 | 1212.510234 | 606.758755 | 1211.526218 | 606.266747 | P | 316.186698 | 158.596987 | 298.176133 | 149.591705 | 3 |
| 13 | 1330.584462 | 665.795869 | 1313.557913 | 657.282594 | 1312.573897 | 656.790586 | T | 219.133934 | 110.070605 | 201.123369 | 101.065323 | 2 |
| 14 |             |            |             |            |             |            | V | 118.086255 | 59.546766  |            |            | 1 |

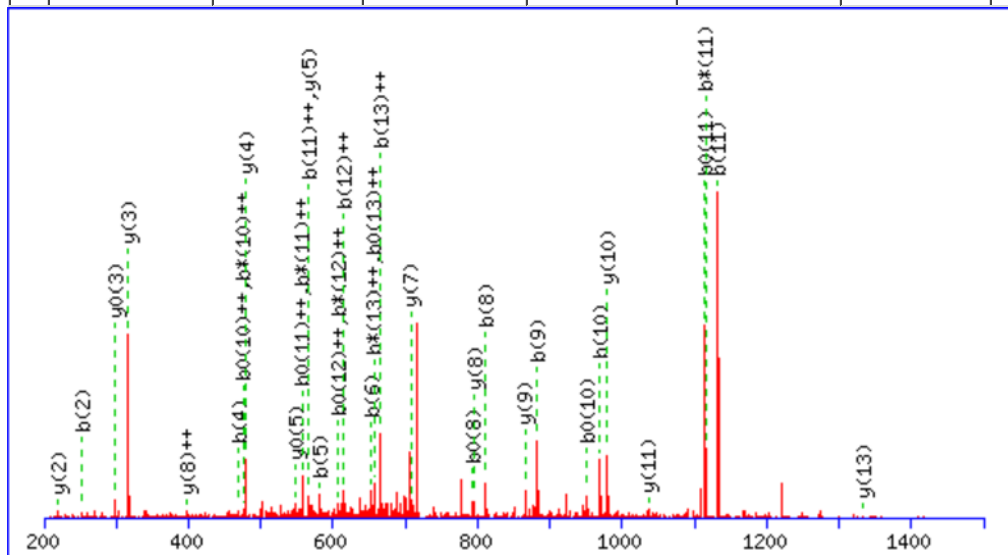

## Peptide View

MS/MS Fragmentation of **LLIYDASNLETGVPSR**

Found in **IPI00003111**, Tax\_Id=9606 Gene\_Symbol=LOC652694 Ig kappa chain V-I region AU

**Experiment:** 10 - S\_D-1 **Fraction:** S\_D-1

Match to Query 13048: 1746.916048 from(874.465300,2+)

Title: OECHL100310\_31.16933.16933.2.dta

Data file \\BOROMIR\Masse\Data LTQ-Orbitrap\Chrystelle Lacroix\Etude clinique sJPU\OECHL100310\_31.raw

**Monoisotopic mass of neutral peptide Mr(calc):** 1746.915192 **Fixed modifications:** Carbamidomethyl (C) (apply to specified residues or termini only) **Ions Score:** 79

**Expect:** 1.2e-006**Matches :** 26/156 fragment ions using 42 most intense peaks ([help](#))

| #  | b                  | b <sup>++</sup>   | b*                 | b <sup>*++</sup> | b <sup>0</sup> | b <sup>0++</sup> | Seq. | y                  | y <sup>++</sup> | y*                | y <sup>*++</sup> | y <sup>0</sup>     | y <sup>0++</sup> | #  |
|----|--------------------|-------------------|--------------------|------------------|----------------|------------------|------|--------------------|-----------------|-------------------|------------------|--------------------|------------------|----|
| 1  | 114.091340         | 57.549308         |                    |                  |                |                  | L    |                    |                 |                   |                  |                    |                  | 16 |
| 2  | 227.175404         | 114.091340        |                    |                  |                |                  | L    | 1634.838427        | 817.922852      | 1617.811878       | 809.409577       | 1616.827862        | 808.917569       | 15 |
| 3  | 340.259468         | 170.633372        |                    |                  |                |                  | I    | <b>1521.754363</b> | 761.380820      | 1504.727814       | 752.867545       | 1503.743798        | 752.375537       | 14 |
| 4  | 503.322797         | 252.165036        |                    |                  |                |                  | Y    | 1408.670299        | 704.838788      | 1391.643750       | 696.325513       | <b>1390.659734</b> | 695.833505       | 13 |
| 5  | <b>618.349740</b>  | 309.678508        |                    |                  | 600.339175     | 300.673226       | D    | 1245.606970        | 623.307123      | 1228.580421       | 614.793849       | 1227.596405        | 614.301841       | 12 |
| 6  | <b>689.386854</b>  | 345.197065        |                    |                  | 671.376289     | 336.191782       | A    | <b>1130.580027</b> | 565.793652      | 1113.553478       | 557.280377       | 1112.569462        | 556.788369       | 11 |
| 7  | 776.418882         | 388.713079        |                    |                  | 758.408317     | 379.707796       | S    | <b>1059.542913</b> | 530.275095      | 1042.516364       | 521.761820       | 1041.532348        | 521.269812       | 10 |
| 8  | 890.461809         | 445.734542        | 873.435260         | 437.221268       | 872.451244     | 436.729260       | N    | <b>972.510885</b>  | 486.759081      | 955.484336        | 478.245806       | 954.500320         | 477.753798       | 9  |
| 9  | <b>1003.545873</b> | 502.276574        | <b>986.519324</b>  | 493.763300       | 985.535308     | 493.271292       | L    | <b>858.467958</b>  | 429.737617      | 841.441409        | 421.224343       | 840.457393         | 420.732335       | 8  |
| 10 | <b>1132.588466</b> | 566.797871        | 1115.561917        | 558.284597       | 1114.577901    | 557.792588       | E    | <b>745.383894</b>  | 373.195585      | 728.357345        | 364.682311       | 727.373329         | 364.190303       | 7  |
| 11 | 1233.636145        | <b>617.321710</b> | 1216.609596        | 608.808436       | 1215.625580    | 608.316428       | T    | <b>616.341301</b>  | 308.674289      | 599.314752        | 300.161014       | 598.330736         | 299.669006       | 6  |
| 12 | <b>1290.657609</b> | 645.832442        | 1273.631060        | 637.319168       | 1272.647044    | 636.827160       | G    | <b>515.293622</b>  | 258.150449      | 498.267073        | 249.637175       | 497.283057         | 249.145167       | 5  |
| 13 | <b>1389.726023</b> | 695.366649        | <b>1372.699474</b> | 686.853375       | 1371.715458    | 686.361367       | V    | <b>458.272158</b>  | 229.639717      | 441.245609        | 221.126443       | 440.261593         | 220.634435       | 4  |
| 14 | <b>1486.778787</b> | 743.893032        | 1469.752238        | 735.379757       | 1468.768222    | 734.887749       | P    | <b>359.203744</b>  | 180.105510      | <b>342.177195</b> | 171.592236       | <b>341.193179</b>  | 171.100228       | 3  |
| 15 | <b>1573.810815</b> | 787.409046        | <b>1556.784266</b> | 778.895771       | 1555.800250    | 778.403763       | S    | <b>262.150980</b>  | 131.579128      | 245.124431        | 123.065854       | 244.140415         | 122.573846       | 2  |
| 16 |                    |                   |                    |                  |                |                  | R    | 175.118952         | 88.063114       | 158.092403        | 79.549839        |                    |                  | 1  |

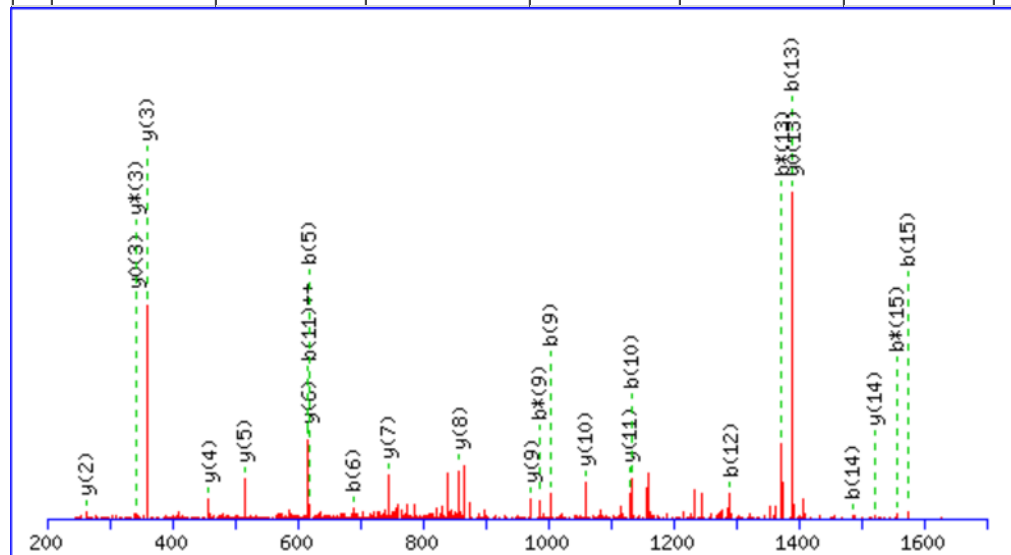

## Peptide View

MS/MS Fragmentation of **GYSTTVTGR**

Found in **IPI00029168**, Tax\_Id=9606 Gene\_Symbol=LPA Apolipoprotein(a)

**Experiment:** 10 - S\_D-1 **Fraction:** S\_D-1

Match to Query 4031: 1041.511848 from(521.763200,2+)

Title: OECHL100310\_31.4162.4162.2.dta

Data file \\BOROMIR\Masse\Data LTQ-Orbitrap\Chrystelle Lacroix\Etude clinique sJPU\OECHL100310\_31.raw

**Monoisotopic mass of neutral peptide Mr(calc):** 1041.509109 **Fixed modifications:** Carbamidomethyl (C) (apply to specified residues or termini only) **Ions Score:** 66

**Expect:** 2.1e-005 **Matches :** 16/84 fragment ions using 27 most intense peaks ([help](#))

| #  | b                 | b <sup>++</sup> | b <sup>0</sup>    | b <sup>0++</sup> | Seq.     | y                 | y <sup>++</sup> | y*         | y <sup>*++</sup> | y <sup>0</sup> | y <sup>0++</sup>  | #         |
|----|-------------------|-----------------|-------------------|------------------|----------|-------------------|-----------------|------------|------------------|----------------|-------------------|-----------|
| 1  | 58.028740         | 29.518008       |                   |                  | <b>G</b> |                   |                 |            |                  |                |                   | <b>10</b> |
| 2  | 159.076419        | 80.041847       | 141.065854        | 71.036565        | <b>T</b> | 985.494903        | 493.251090      | 968.468354 | 484.737815       | 967.484338     | 484.245807        | <b>9</b>  |
| 3  | 322.139748        | 161.573512      | <b>304.129183</b> | 152.568230       | <b>Y</b> | <b>884.447224</b> | 442.727250      | 867.420675 | 434.213976       | 866.436659     | <b>433.721968</b> | <b>8</b>  |
| 4  | <b>409.171776</b> | 205.089526      | 391.161211        | 196.084243       | <b>S</b> | <b>721.383895</b> | 361.195586      | 704.357346 | 352.682311       | 703.373330     | 352.190303        | <b>7</b>  |
| 5  | 510.219455        | 255.613365      | 492.208890        | 246.608083       | <b>T</b> | <b>634.351867</b> | 317.679572      | 617.325318 | 309.166297       | 616.341302     | 308.674289        | <b>6</b>  |
| 6  | <b>611.267134</b> | 306.137205      | 593.256569        | 297.131923       | <b>T</b> | <b>533.304188</b> | 267.155732      | 516.277639 | 258.642458       | 515.293623     | 258.150450        | <b>5</b>  |
| 7  | <b>710.335548</b> | 355.671412      | <b>692.324983</b> | 346.666130       | <b>V</b> | <b>432.256509</b> | 216.631893      | 415.229960 | 208.118618       | 414.245944     | 207.626610        | <b>4</b>  |
| 8  | <b>811.383227</b> | 406.195252      | <b>793.372662</b> | 397.189969       | <b>T</b> | <b>333.188095</b> | 167.097686      | 316.161546 | 158.584411       | 315.177530     | 158.092403        | <b>3</b>  |
| 9  | 868.404691        | 434.705984      | 850.394126        | 425.700701       | <b>G</b> | <b>232.140416</b> | 116.573846      | 215.113867 | 108.060572       |                |                   | <b>2</b>  |
| 10 |                   |                 |                   |                  | <b>R</b> | <b>175.118952</b> | 88.063114       | 158.092403 | 79.549840        |                |                   | <b>1</b>  |

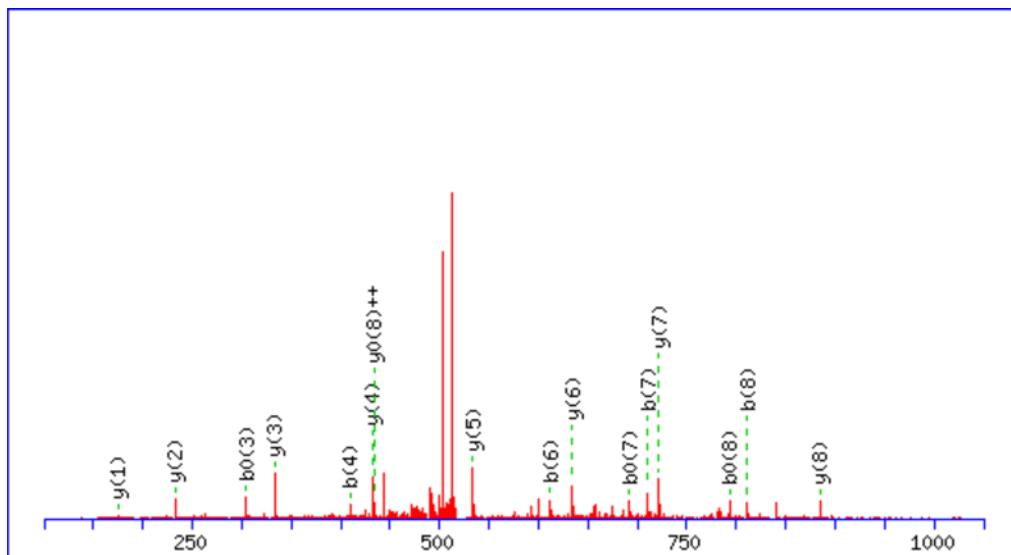

## Peptide View

MS/MS Fragmentation of **VTEIWQEVMQR**

Found in **IPI00027827**, Tax\_Id=9606 Gene\_Symbol=SOD3 Extracellular superoxide dismutase [Cu-Zn]

**Experiment:** 10 - S\_D-1 **Fraction:** S\_D-1

Match to Query 9439: 1417.701848 from(709.858200,2+)

Title: OECHL100310\_31.18497.18497.2.dta

Data file \\BOROMIR\Masse\Data LTQ-Orbitrap\Chrystelle Lacroix\Etude clinique sJPU\OECHL100310\_31.raw

**Monoisotopic mass of neutral peptide Mr(calc):** 1417.702377 **Fixed modifications:** Carbamidomethyl (C) (apply to specified residues or termini only) **Ions Score:** 83

**Expect:** 7.8e-007 **Matches :** 21/100 fragment ions using 24 most intense peaks ([help](#))

| # | b                 | b <sup>++</sup> | b*         | b <sup>*++</sup> | b <sup>0</sup>    | b <sup>0++</sup> | Seq. | y                  | y <sup>++</sup> | y*          | y <sup>*++</sup> | y <sup>0</sup> | y <sup>0++</sup> | #  |
|---|-------------------|-----------------|------------|------------------|-------------------|------------------|------|--------------------|-----------------|-------------|------------------|----------------|------------------|----|
| 1 | 100.075690        | 50.541483       |            |                  |                   |                  | V    |                    |                 |             |                  |                |                  | 11 |
| 2 | 201.123369        | 101.065322      |            |                  | 183.112804        | 92.060040        | T    | <b>1319.641249</b> | 660.324263      | 1302.614700 | 651.810988       | 1301.630684    | 651.318980       | 10 |
| 3 | <b>330.165962</b> | 165.586619      |            |                  | <b>312.155397</b> | 156.581336       | E    | <b>1218.593570</b> | 609.800423      | 1201.567021 | 601.287149       | 1200.583005    | 600.795141       | 9  |
| 4 | <b>443.250026</b> | 222.128651      |            |                  | 425.239461        | 213.123369       | I    | <b>1089.550977</b> | 545.279127      | 1072.524428 | 536.765852       | 1071.540412    | 536.273844       | 8  |
| 5 | 629.329339        | 315.168308      |            |                  | 611.318774        | 306.163025       | W    | <b>976.466913</b>  | 488.737095      | 959.440364  | 480.223820       | 958.456348     | 479.731812       | 7  |
| 6 | <b>757.387917</b> | 379.197597      | 740.361368 | 370.684322       | 739.377352        | 370.192314       | Q    | <b>790.387600</b>  | 395.697438      | 773.361051  | 387.184164       | 772.377035     | 386.692156       | 6  |

|    |             |            |             |            |             |            |   |            |            |            |            |            |            |   |
|----|-------------|------------|-------------|------------|-------------|------------|---|------------|------------|------------|------------|------------|------------|---|
| 7  | 886.430510  | 443.718893 | 869.403961  | 435.205619 | 868.419945  | 434.713611 | E | 662.329022 | 331.668149 | 645.302473 | 323.154875 | 644.318457 | 322.662867 | 5 |
| 8  | 985.498924  | 493.253100 | 968.472375  | 484.739826 | 967.488359  | 484.247818 | V | 533.286429 | 267.146853 | 516.259880 | 258.633578 |            |            | 4 |
| 9  | 1116.539409 | 558.773343 | 1099.512860 | 550.260068 | 1098.528844 | 549.768060 | M | 434.218015 | 217.612646 | 417.191466 | 209.099371 |            |            | 3 |
| 10 | 1244.597987 | 622.802632 | 1227.571438 | 614.289357 | 1226.587422 | 613.797349 | Q | 303.177530 | 152.092403 | 286.150981 | 143.579129 |            |            | 2 |
| 11 |             |            |             |            |             |            | R | 175.118952 | 88.063114  | 158.092403 | 79.549839  |            |            | 1 |

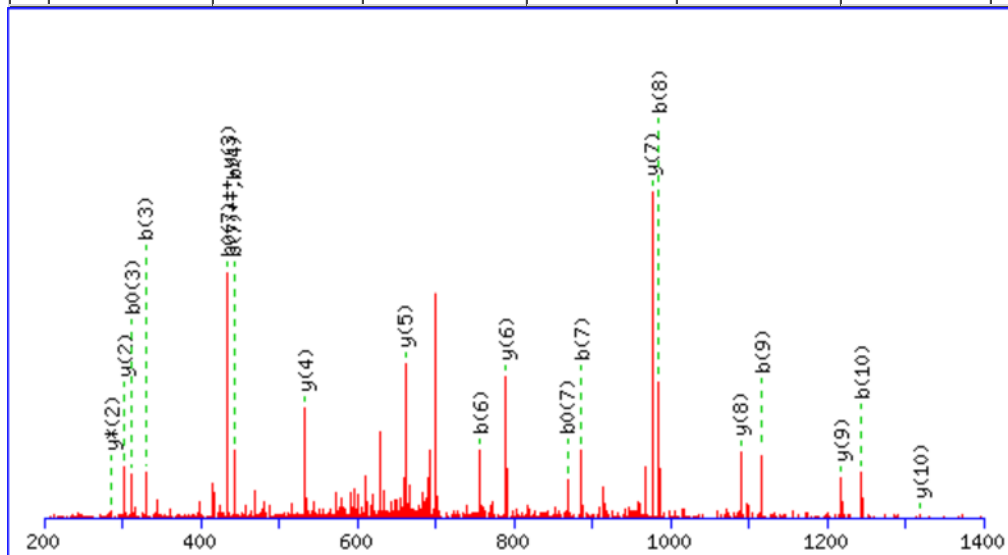

## Peptide View

MS/MS Fragmentation of **AHGQESAIFNEVAPGYFSR**

Found in **IP100170635**, Tax\_Id=9606 Gene\_Symbol=SECTM1 Secreted and transmembrane protein 1

Experiment: 10 - S\_D-1 Fraction: S\_D-1

Match to Query 15608: 2078.981448 from(1040.498000,2+)

Title: OECHL100310\_31.17174.17174.2.dta

Data file \\BOROMIR\Masse\Data LTQ-Orbitrap\Chrystelle Lacroix\Etude clinique sJPU\OECHL100310\_31.raw

**Monoisotopic mass of neutral peptide Mr(calc):** 2078.980988 **Fixed modifications:** Carbamidomethyl (C) (apply to specified residues or termini only) **Ions Score:** 83

**Expect:** 8.5e-007 **Matches :** 34/200 fragment ions using 66 most intense peaks ([help](#))

| # | b         | b <sup>++</sup> | b* | b <sup>*++</sup> | b <sup>0</sup> | b <sup>0++</sup> | Seq. | y | y <sup>++</sup> | y* | y <sup>*++</sup> | y <sup>0</sup> | y <sup>0++</sup> | #  |
|---|-----------|-----------------|----|------------------|----------------|------------------|------|---|-----------------|----|------------------|----------------|------------------|----|
| 1 | 72.044390 | 36.525833       |    |                  |                |                  | A    |   |                 |    |                  |                |                  | 19 |

|    |                    |                   |             |            |                   |                   |  |          |                    |                    |             |                   |                    |                   |           |
|----|--------------------|-------------------|-------------|------------|-------------------|-------------------|--|----------|--------------------|--------------------|-------------|-------------------|--------------------|-------------------|-----------|
| 2  | 209.103302         | 105.055289        |             |            |                   |                   |  | <b>H</b> | 2008.951166        | <b>1004.979221</b> | 1991.924617 | 996.465947        | 1990.940601        | 995.973939        | <b>18</b> |
| 3  | 266.124766         | 133.566021        |             |            |                   |                   |  | <b>G</b> | <b>1871.892254</b> | 936.449765         | 1854.865705 | <b>927.936491</b> | 1853.881689        | 927.444483        | <b>17</b> |
| 4  | <b>394.183344</b>  | 197.595310        | 377.156795  | 189.082035 |                   |                   |  | <b>Q</b> | 1814.870790        | 907.939033         | 1797.844241 | 899.425759        | <b>1796.860225</b> | 898.933751        | <b>16</b> |
| 5  | <b>523.225937</b>  | 262.116607        | 506.199388  | 253.603332 | 505.215372        | 253.111324        |  | <b>E</b> | <b>1686.812212</b> | 843.909744         | 1669.785663 | 835.396470        | 1668.801647        | 834.904462        | <b>15</b> |
| 6  | 610.257965         | 305.632621        | 593.231416  | 297.119346 | 592.247400        | 296.627338        |  | <b>S</b> | <b>1557.769619</b> | 779.388448         | 1540.743070 | 770.875173        | 1539.759054        | 770.383165        | <b>14</b> |
| 7  | <b>681.295079</b>  | 341.151178        | 664.268530  | 332.637903 | <b>663.284514</b> | 332.145895        |  | <b>A</b> | <b>1470.737591</b> | 735.872434         | 1453.711042 | <b>727.359159</b> | 1452.727026        | <b>726.867151</b> | <b>13</b> |
| 8  | <b>794.379143</b>  | 397.693210        | 777.352594  | 389.179935 | 776.368578        | 388.687927        |  | <b>I</b> | <b>1399.700477</b> | 700.353877         | 1382.673928 | 691.840602        | 1381.689912        | 691.348594        | <b>12</b> |
| 9  | <b>941.447557</b>  | 471.227417        | 924.421008  | 462.714142 | 923.436992        | <b>462.222134</b> |  | <b>F</b> | <b>1286.616413</b> | 643.811845         | 1269.589864 | 635.298570        | 1268.605848        | 634.806562        | <b>11</b> |
| 10 | 1055.490484        | 528.248880        | 1038.463935 | 519.735606 | 1037.479919       | 519.243597        |  | <b>N</b> | <b>1139.547999</b> | 570.277638         | 1122.521450 | 561.764363        | 1121.537434        | 561.272355        | <b>10</b> |
| 11 | <b>1184.533077</b> | 592.770176        | 1167.506528 | 584.256902 | 1166.522512       | 583.764894        |  | <b>E</b> | <b>1025.505072</b> | 513.256174         | 1008.478523 | 504.742900        | 1007.494507        | 504.250892        | <b>9</b>  |
| 12 | <b>1283.601491</b> | 642.304383        | 1266.574942 | 633.791109 | 1265.590926       | 633.299101        |  | <b>V</b> | <b>896.462479</b>  | 448.734878         | 879.435930  | 440.221603        | 878.451914         | 439.729595        | <b>8</b>  |
| 13 | <b>1354.638605</b> | 677.822940        | 1337.612056 | 669.309666 | 1336.628040       | 668.817658        |  | <b>A</b> | <b>797.394065</b>  | 399.200671         | 780.367516  | 390.687396        | 779.383500         | 390.195388        | <b>7</b>  |
| 14 | <b>1451.691369</b> | <b>726.349322</b> | 1434.664820 | 717.836048 | 1433.680804       | 717.344040        |  | <b>P</b> | <b>726.356951</b>  | 363.682114         | 709.330402  | 355.168839        | 708.346386         | 354.676831        | <b>6</b>  |
| 15 | <b>1508.712833</b> | 754.860054        | 1491.686284 | 746.346780 | 1490.702268       | 745.854772        |  | <b>G</b> | <b>629.304187</b>  | 315.155732         | 612.277638  | 306.642457        | 611.293622         | 306.150449        | <b>5</b>  |
| 16 | <b>1671.776162</b> | 836.391719        | 1654.749613 | 827.878445 | 1653.765597       | 827.386436        |  | <b>Y</b> | <b>572.282723</b>  | 286.645000         | 555.256174  | 278.131725        | 554.272158         | 277.639717        | <b>4</b>  |
| 17 | <b>1818.844576</b> | 909.925926        | 1801.818027 | 901.412652 | 1800.834011       | 900.920643        |  | <b>F</b> | <b>409.219394</b>  | 205.113335         | 392.192845  | 196.600061        | 391.208829         | 196.108053        | <b>3</b>  |
| 18 | 1905.876604        | 953.441940        | 1888.850055 | 944.928666 | 1887.866039       | 944.436658        |  | <b>S</b> | 262.150980         | 131.579128         | 245.124431  | 123.065854        | 244.140415         | 122.573846        | <b>2</b>  |
| 19 |                    |                   |             |            |                   |                   |  | <b>R</b> | 175.118952         | 88.063114          | 158.092403  | 79.549840         |                    |                   | <b>1</b>  |

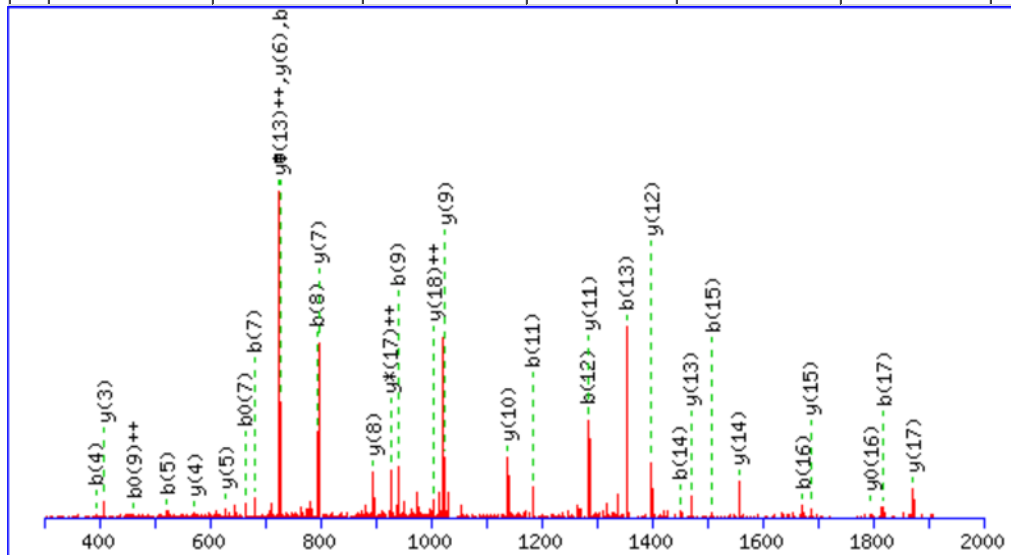

## Peptide View

MS/MS Fragmentation of **AVGLLTVISK**

Found in **IP100013446**, Tax\_Id=9606 Gene\_Symbol=PSCA Prostate stem cell antigen

**Experiment:** 10 - S\_D-1 **Fraction:** S\_D-1

Match to Query 3292: 999.633248 from(500.823900,2+)

Title: OECHL100310\_31.17092.17092.2.dta

Data file \\BOROMIR\Masse\Data LTQ-Orbitrap\Chrystelle Lacroix\Etude clinique sJPU\OECHL100310\_31.raw

**Monoisotopic mass of neutral peptide Mr(calc):** 999.632828 **Fixed modifications:** Carbamidomethyl (C) (apply to specified residues or termini only) **Ions Score:** 63

**Expect:** 5.8e-006 **Matches :** 16/78 fragment ions using 25 most intense peaks ([help](#))

| #  | b                 | b <sup>++</sup>   | b <sup>0</sup> | b <sup>0++</sup> | Seq. | y                 | y <sup>++</sup>   | y*         | y* <sup>++</sup> | y <sup>0</sup> | y <sup>0++</sup> | #  |
|----|-------------------|-------------------|----------------|------------------|------|-------------------|-------------------|------------|------------------|----------------|------------------|----|
| 1  | 72.044390         | 36.525833         |                |                  | A    |                   |                   |            |                  |                |                  | 10 |
| 2  | <b>171.112804</b> | 86.060040         |                |                  | V    | 929.602995        | 465.305136        | 912.576446 | 456.791861       | 911.592430     | 456.299853       | 9  |
| 3  | <b>228.134268</b> | 114.570772        |                |                  | G    | <b>830.534581</b> | <b>415.770929</b> | 813.508032 | 407.257654       | 812.524016     | 406.765646       | 8  |
| 4  | <b>341.218332</b> | <b>171.112804</b> |                |                  | L    | 773.513117        | 387.260197        | 756.486568 | 378.746922       | 755.502552     | 378.254914       | 7  |
| 5  | <b>454.302396</b> | 227.654836        |                |                  | L    | <b>660.429053</b> | 330.718165        | 643.402504 | 322.204890       | 642.418488     | 321.712882       | 6  |
| 6  | <b>555.350075</b> | 278.178676        | 537.339510     | 269.173393       | T    | <b>547.344989</b> | 274.176133        | 530.318440 | 265.662858       | 529.334424     | 265.170850       | 5  |
| 7  | <b>654.418489</b> | 327.712883        | 636.407924     | 318.707600       | V    | <b>446.297310</b> | 223.652293        | 429.270761 | 215.139018       | 428.286745     | 214.647010       | 4  |
| 8  | <b>767.502553</b> | 384.254915        | 749.491988     | 375.249632       | I    | <b>347.228896</b> | 174.118086        | 330.202347 | 165.604811       | 329.218331     | 165.112803       | 3  |
| 9  | <b>854.534581</b> | 427.770929        | 836.524016     | 418.765646       | S    | <b>234.144832</b> | 117.576054        | 217.118283 | 109.062779       | 216.134267     | 108.570771       | 2  |
| 10 |                   |                   |                |                  | K    | 147.112804        | 74.060040         | 130.086255 | 65.546765        |                |                  | 1  |

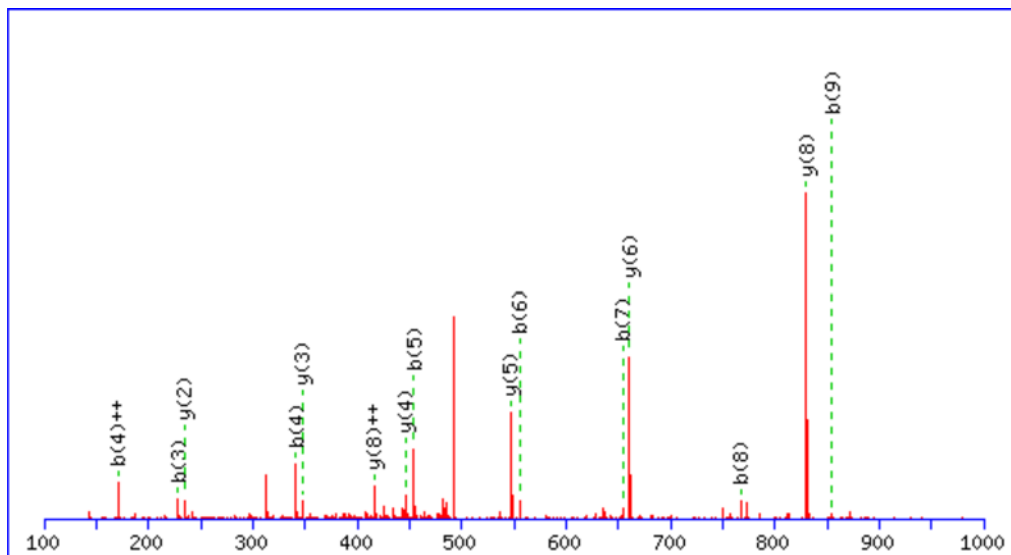

## Peptide View

MS/MS Fragmentation of **HSFKGEECPAGSHR**

Found in **IPI00021970**, Tax\_Id=9606 Gene\_Symbol=MGC31957;TNFRSF10C TNFRSF10C protein

**Experiment:** 10 - S\_D-1 **Fraction:** S\_D-1

Match to Query 11452: 1597.707248 from(799.860900,2+)

Title: OECHL100310\_31.2163.2163.2.dta

Data file \\BOROMIR\Masse\Data LTQ-Orbitrap\Chrystelle Lacroix\Etude clinique sJPU\OECHL100310\_31.raw

**Monoisotopic mass of neutral peptide Mr(calc):** 1597.705566 **Fixed modifications:** Carbamidomethyl (C) (apply to specified residues or termini only) **Ions Score:** 76

**Expect:** 1.4e-006 **Matches :** 49/144 fragment ions using 84 most intense peaks ([help](#))

| # | b                 | b <sup>++</sup> | b*                | b <sup>*++</sup> | b <sup>0</sup>    | b <sup>0++</sup> | Seq.     | y                  | y <sup>++</sup>   | y*          | y <sup>*++</sup>  | y <sup>0</sup>     | y <sup>0++</sup>  | #         |
|---|-------------------|-----------------|-------------------|------------------|-------------------|------------------|----------|--------------------|-------------------|-------------|-------------------|--------------------|-------------------|-----------|
| 1 | 138.066188        | 69.536732       |                   |                  |                   |                  | <b>H</b> |                    |                   |             |                   |                    |                   | <b>14</b> |
| 2 | <b>225.098216</b> | 113.052746      |                   |                  | 207.087651        | 104.047463       | <b>S</b> | <b>1461.653938</b> | <b>731.330607</b> | 1444.627389 | <b>722.817333</b> | <b>1443.643373</b> | <b>722.325325</b> | <b>13</b> |
| 3 | <b>372.166630</b> | 186.586953      |                   |                  | <b>354.156065</b> | 177.581671       | <b>F</b> | <b>1374.621910</b> | <b>687.814593</b> | 1357.595361 | 679.301319        | 1356.611345        | 678.809311        | <b>12</b> |
| 4 | <b>500.261593</b> | 250.634435      | <b>483.235044</b> | 242.121160       | <b>482.251028</b> | 241.629152       | <b>K</b> | <b>1227.553496</b> | <b>614.280386</b> | 1210.526947 | 605.767112        | <b>1209.542931</b> | 605.275104        | <b>11</b> |
| 5 | <b>557.283057</b> | 279.145167      | 540.256508        | 270.631892       | <b>539.272492</b> | 270.139884       | <b>G</b> | <b>1099.458533</b> | 550.232905        | 1082.431984 | 541.719630        | 1081.447968        | 541.227622        | <b>10</b> |
| 6 | <b>686.325650</b> | 343.666463      | 669.299101        | 335.153189       | <b>668.315085</b> | 334.661181       | <b>E</b> | <b>1042.437069</b> | 521.722173        | 1025.410520 | 513.208898        | 1024.426504        | 512.716890        | <b>9</b>  |



|    |                    |            |                    |                   |                    |                   |          |                   |                   |                   |            |                   |            |          |
|----|--------------------|------------|--------------------|-------------------|--------------------|-------------------|----------|-------------------|-------------------|-------------------|------------|-------------------|------------|----------|
| 7  | <b>815.368243</b>  | 408.187760 | 798.341694         | <b>399.674485</b> | 797.357678         | <b>399.182477</b> | <b>E</b> | <b>913.394476</b> | <b>457.200876</b> | <b>896.367927</b> | 448.687602 | <b>895.383911</b> | 448.195594 | <b>8</b> |
| 8  | <b>975.398892</b>  | 488.203084 | <b>958.372343</b>  | 479.689810        | <b>957.388327</b>  | 479.197802        | <b>C</b> | <b>784.351883</b> | 392.679580        | 767.325334        | 384.166305 | 766.341318        | 383.674297 | <b>7</b> |
| 9  | 1072.451656        | 536.729466 | 1055.425107        | 528.216192        | 1054.441091        | <b>527.724184</b> | <b>P</b> | <b>624.321234</b> | <b>312.664255</b> | 607.294685        | 304.150981 | <b>606.310669</b> | 303.658973 | <b>6</b> |
| 10 | <b>1143.488770</b> | 572.248023 | 1126.462221        | 563.734749        | 1125.478205        | 563.242741        | <b>A</b> | <b>527.268470</b> | 264.137873        | 510.241921        | 255.624598 | 509.257905        | 255.132590 | <b>5</b> |
| 11 | <b>1200.510234</b> | 600.758755 | 1183.483685        | 592.245481        | 1182.499669        | 591.753473        | <b>G</b> | <b>456.231356</b> | 228.619316        | 439.204807        | 220.106041 | 438.220791        | 219.614033 | <b>4</b> |
| 12 | <b>1287.542262</b> | 644.274769 | <b>1270.515713</b> | 635.761495        | <b>1269.531697</b> | 635.269487        | <b>S</b> | <b>399.209892</b> | 200.108584        | 382.183343        | 191.595309 | 381.199327        | 191.103301 | <b>3</b> |
| 13 | <b>1424.601174</b> | 712.804225 | <b>1407.574625</b> | 704.290951        | <b>1406.590609</b> | 703.798943        | <b>H</b> | <b>312.177864</b> | 156.592570        | 295.151315        | 148.079295 |                   |            | <b>2</b> |
| 14 |                    |            |                    |                   |                    |                   | <b>R</b> | 175.118952        | 88.063114         | 158.092403        | 79.549839  |                   |            | <b>1</b> |

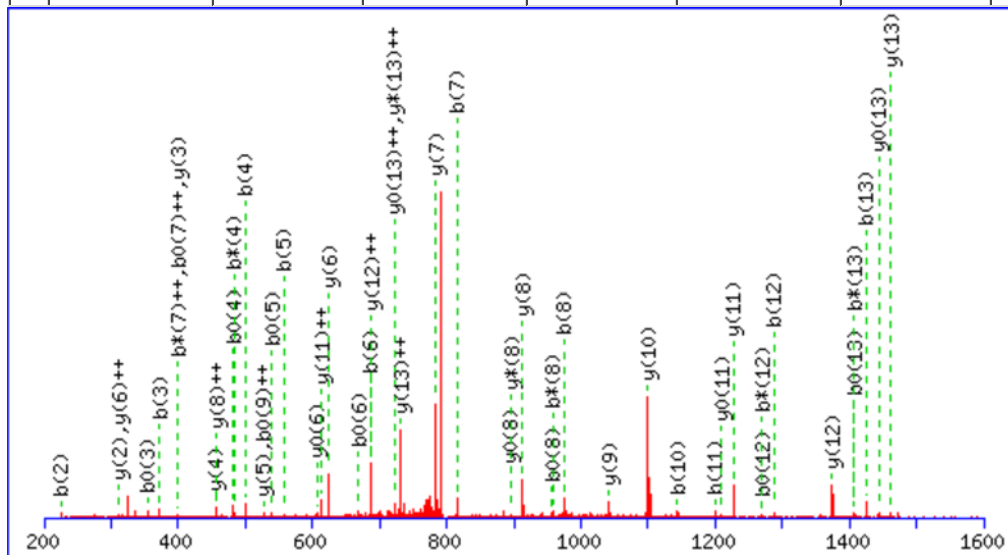

## Peptide View

MS/MS Fragmentation of **SKEDSNSTESKSSSEEDGQLK**

Found in **IP100012734**, Tax\_Id=9606 Gene\_Symbol=DMP1 Isoform 1 of Dentin matrix acidic phosphoprotein 1

**Experiment:** 10 - S\_D-1 **Fraction:** S\_D-1

Match to Query 16680: 2270.999448 from(1136.507000,2+)

Title: OECHL100310\_31.2175.2175.2.dta

Data file \\BOROMIR\Masse\Data LTQ-Orbitrap\Chrystelle Lacroix\Etude clinique sJPU\OECHL100310\_31.raw

**Monoisotopic mass of neutral peptide Mr(calc):** 2270.998581 **Fixed modifications:** Carbamidomethyl (C) (apply to specified residues or termini only) **Ions Score:** 99

**Expect:** 1.2e-008**Matches :** 34/230 fragment ions using 51 most intense peaks ([help](#))

| #  | b                  | b <sup>++</sup>   | b*          | b <sup>*++</sup>  | b <sup>0</sup>     | b <sup>0++</sup>  | Seq. | y                  | y <sup>++</sup>   | y*          | y <sup>*++</sup> | y <sup>0</sup>     | y <sup>0++</sup> |
|----|--------------------|-------------------|-------------|-------------------|--------------------|-------------------|------|--------------------|-------------------|-------------|------------------|--------------------|------------------|
| 1  | 88.039304          | 44.523290         |             |                   | 70.028739          | 35.518008         | S    |                    |                   |             |                  |                    |                  |
| 2  | 216.134267         | 108.570771        | 199.107718  | 100.057497        | 198.123702         | 99.565489         | K    | 2184.973868        | 1092.990572       | 2167.947319 | 1084.477297      | 2166.963303        | 1083.9852        |
| 3  | 345.176860         | 173.092068        | 328.150311  | 164.578793        | 327.166295         | 164.086785        | E    | 2056.878905        | 1028.943090       | 2039.852356 | 1020.429816      | 2038.868340        | 1019.9378        |
| 4  | <b>460.203803</b>  | 230.605539        | 443.177254  | 222.092265        | 442.193238         | 221.600257        | D    | <b>1927.836312</b> | <b>964.421794</b> | 1910.809763 | 955.908520       | 1909.825747        | 955.4165         |
| 5  | <b>547.235831</b>  | 274.121554        | 530.209282  | 265.608279        | 529.225266         | 265.116271        | S    | <b>1812.809369</b> | <b>906.908323</b> | 1795.782820 | 898.395048       | 1794.798804        | 897.9030         |
| 6  | <b>661.278758</b>  | 331.143017        | 644.252209  | 322.629743        | 643.268193         | 322.137735        | N    | <b>1725.777341</b> | 863.392309        | 1708.750792 | 854.879034       | 1707.766776        | 854.3870         |
| 7  | 748.310786         | 374.659031        | 731.284237  | <b>366.145757</b> | 730.300221         | 365.653749        | S    | 1611.734414        | <b>806.370845</b> | 1594.707865 | 797.857571       | <b>1593.723849</b> | 797.3655         |
| 8  | 849.358465         | <b>425.182871</b> | 832.331916  | 416.669596        | 831.347900         | 416.177588        | T    | <b>1524.702386</b> | 762.854831        | 1507.675837 | 754.341557       | 1506.691821        | 753.8495         |
| 9  | <b>978.401058</b>  | 489.704167        | 961.374509  | 481.190893        | 960.390493         | 480.698885        | E    | <b>1423.654707</b> | 712.330992        | 1406.628158 | 703.817717       | 1405.644142        | 703.3257         |
| 10 | 1065.433086        | 533.220181        | 1048.406537 | 524.706907        | 1047.422521        | 524.214899        | S    | <b>1294.612114</b> | 647.809695        | 1277.585565 | 639.296421       | 1276.601549        | 638.8044         |
| 11 | <b>1193.528049</b> | 597.267663        | 1176.501500 | 588.754388        | 1175.517484        | 588.262380        | K    | <b>1207.580086</b> | 604.293681        | 1190.553537 | 595.780407       | 1189.569521        | 595.2883         |
| 12 | <b>1280.560077</b> | 640.783677        | 1263.533528 | 632.270402        | 1262.549512        | 631.778394        | S    | <b>1079.485123</b> | 540.246200        | 1062.458574 | 531.732925       | 1061.474558        | 531.2409         |
| 13 | <b>1367.592105</b> | 684.299691        | 1350.565556 | 675.786416        | 1349.581540        | 675.294408        | S    | <b>992.453095</b>  | 496.730186        | 975.426546  | 488.216911       | 974.442530         | 487.7249         |
| 14 | <b>1454.624133</b> | 727.815705        | 1437.597584 | 719.302430        | 1436.613568        | 718.810422        | S    | <b>905.421067</b>  | 453.214172        | 888.394518  | 444.700897       | 887.410502         | 444.2088         |
| 15 | <b>1583.666726</b> | 792.337001        | 1566.640177 | 783.823727        | 1565.656161        | 783.331719        | E    | <b>818.389039</b>  | 409.698158        | 801.362490  | 401.184883       | 800.378474         | 400.6928         |
| 16 | <b>1712.709319</b> | 856.858298        | 1695.682770 | 848.345023        | 1694.698754        | 847.853015        | E    | <b>689.346446</b>  | 345.176861        | 672.319897  | 336.663587       | 671.335881         | 336.1715         |
| 17 | <b>1827.736262</b> | 914.371769        | 1810.709713 | <b>905.858495</b> | <b>1809.725697</b> | <b>905.366487</b> | D    | <b>560.303853</b>  | 280.655565        | 543.277304  | 272.142290       | 542.293288         | 271.6502         |
| 18 | 1884.757726        | 942.882501        | 1867.731177 | 934.369227        | 1866.747161        | 933.877219        | G    | <b>445.276910</b>  | 223.142093        | 428.250361  | 214.628818       |                    |                  |
| 19 | 2012.816304        | 1006.911790       | 1995.789755 | 998.398516        | 1994.805739        | 997.906508        | Q    | 388.255446         | 194.631361        | 371.228897  | 186.118087       |                    |                  |
| 20 | 2125.900368        | 1063.453822       | 2108.873819 | 1054.940547       | 2107.889803        | 1054.448539       | L    | 260.196868         | 130.602072        | 243.170319  | 122.088798       |                    |                  |
| 21 |                    |                   |             |                   |                    |                   | K    | 147.112804         | 74.060040         | 130.086255  | 65.546765        |                    |                  |

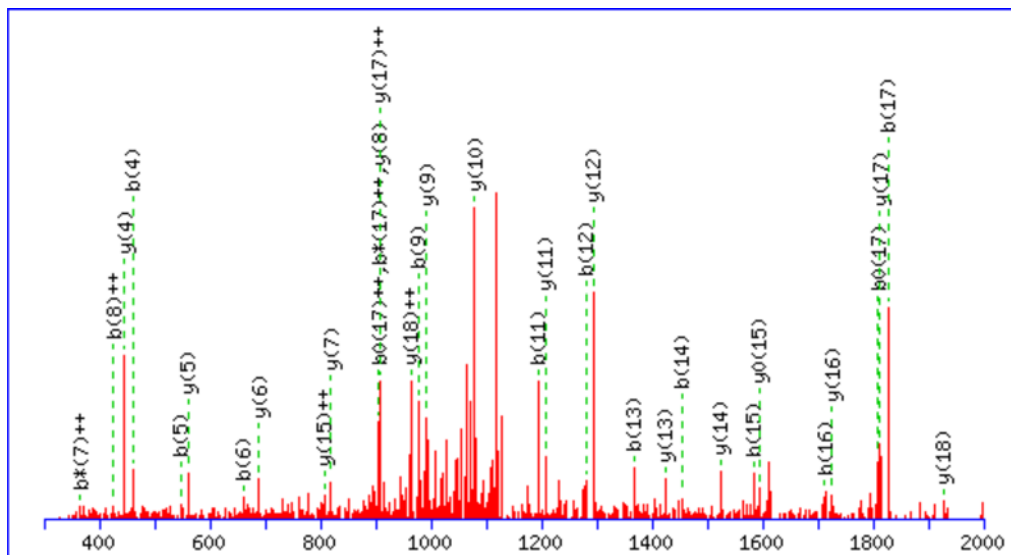

## Peptide View

MS/MS Fragmentation of **SDAAVDT SSEITTK**

Found in **IPI00412977**, Tax\_Id=9606 Gene\_Symbol=- Prothymosin alpha

**Experiment:** 10 - S\_D-1 **Fraction:** S\_D-1

Match to Query 9874: 1465.678648 from(733.846600,2+)

Title: OECHL100310\_31.9693.9693.2.dta

Data file \\BOROMIR\Masse\Data LTQ-Orbitrap\Chrystelle Lacroix\Etude clinique sJPU\OECHL100310\_31.raw

**Monoisotopic mass of neutral peptide Mr(calc):** 1465.678391 **Fixed modifications:** Carbamidomethyl (C) (apply to specified residues or termini only) **Variable modifications:** N-term : Acetyl (N-term) **Ions Score:** 64 **Expect:** 3e-005 **Matches :** 20/128 fragment ions using 26 most intense peaks ([help](#))

| # | b          | b <sup>++</sup> | b <sup>0</sup> | b <sup>0++</sup> | Seq. | y           | y <sup>++</sup> | y <sup>*</sup> | y <sup>*++</sup> | y <sup>0</sup> | y <sup>0++</sup> | #  |
|---|------------|-----------------|----------------|------------------|------|-------------|-----------------|----------------|------------------|----------------|------------------|----|
| 1 | 130.049869 | 65.528572       | 112.039304     | 56.523290        | S    |             |                 |                |                  |                |                  | 14 |
| 2 | 245.076812 | 123.042044      | 227.066247     | 114.036761       | D    | 1337.643082 | 669.325179      | 1320.616533    | 660.811905       | 1319.632517    | 660.319897       | 13 |
| 3 | 316.113926 | 158.560601      | 298.103361     | 149.555319       | A    | 1222.616139 | 611.811708      | 1205.589590    | 603.298433       | 1204.605574    | 602.806425       | 12 |
| 4 | 387.151040 | 194.079158      | 369.140475     | 185.073875       | A    | 1151.579025 | 576.293151      | 1134.552476    | 567.779876       | 1133.568460    | 567.287868       | 11 |
| 5 | 486.219454 | 243.613365      | 468.208889     | 234.608082       | V    | 1080.541911 | 540.774594      | 1063.515362    | 532.261319       | 1062.531346    | 531.769311       | 10 |
| 6 | 601.246397 | 301.126837      | 583.235832     | 292.121554       | D    | 981.473497  | 491.240387      | 964.446948     | 482.727112       | 963.462932     | 482.235104       | 9  |

|    |                    |            |                    |            |          |                   |            |            |            |            |            |          |
|----|--------------------|------------|--------------------|------------|----------|-------------------|------------|------------|------------|------------|------------|----------|
| 7  | <b>702.294076</b>  | 351.650676 | 684.283511         | 342.645394 | <b>T</b> | <b>866.446554</b> | 433.726915 | 849.420005 | 425.213641 | 848.435989 | 424.721633 | <b>8</b> |
| 8  | 789.326104         | 395.166690 | 771.315539         | 386.161408 | <b>S</b> | 765.398875        | 383.203076 | 748.372326 | 374.689801 | 747.388310 | 374.197793 | <b>7</b> |
| 9  | 876.358132         | 438.682704 | 858.347567         | 429.677421 | <b>S</b> | <b>678.366847</b> | 339.687062 | 661.340298 | 331.173787 | 660.356282 | 330.681779 | <b>6</b> |
| 10 | 1005.400725        | 503.204001 | <b>987.390160</b>  | 494.198718 | <b>E</b> | 591.334819        | 296.171048 | 574.308270 | 287.657773 | 573.324254 | 287.165765 | <b>5</b> |
| 11 | <b>1118.484789</b> | 559.746033 | 1100.474224        | 550.740750 | <b>I</b> | <b>462.292226</b> | 231.649751 | 445.265677 | 223.136477 | 444.281661 | 222.644469 | <b>4</b> |
| 12 | <b>1219.532468</b> | 610.269872 | 1201.521903        | 601.264590 | <b>T</b> | <b>349.208162</b> | 175.107719 | 332.181613 | 166.594445 | 331.197597 | 166.102437 | <b>3</b> |
| 13 | <b>1320.580147</b> | 660.793712 | <b>1302.569582</b> | 651.788429 | <b>T</b> | <b>248.160483</b> | 124.583879 | 231.133934 | 116.070605 | 230.149918 | 115.578597 | <b>2</b> |
| 14 |                    |            |                    |            | <b>K</b> | 147.112804        | 74.060040  | 130.086255 | 65.546765  |            |            | <b>1</b> |

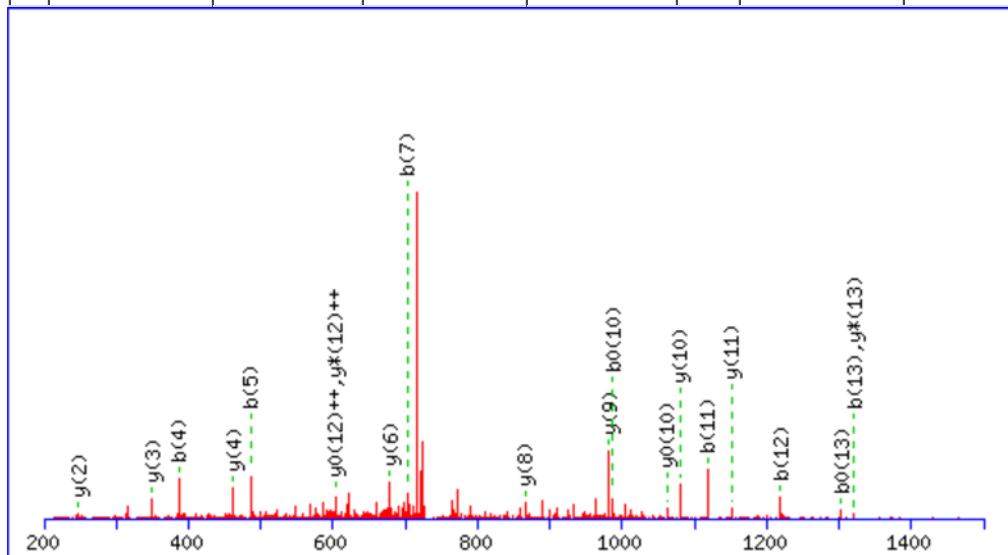

## Peptide View

MS/MS Fragmentation of **VYSTSVTGSR**

Found in **IP100010402**, Tax\_Id=9606 Gene\_Symbol=SH3BGRL3 Putative uncharacterized protein

**Experiment:** 10 - S\_D-1 **Fraction:** S\_D-1

Match to Query 4255: 1055.524448 from(528.769500,2+)

Title: OECHL100310\_31.3907.3907.2.dta

Data file \\BOROMIR\Masse\Data LTQ-Orbitrap\Chrystelle Lacroix\Etude clinique sJPU\OECHL100310\_31.raw

**Monoisotopic mass of neutral peptide Mr(calc):** 1055.524750 **Fixed modifications:** Carbamidomethyl (C) (apply to specified residues or termini only) **Ions Score:** 54

**Expect:** 0.00032**Matches :** 11/84 fragment ions using 18 most intense peaks ([help](#))

| #  | b                 | b <sup>++</sup>   | b <sup>0</sup> | b <sup>0++</sup> | Seq. | y                 | y <sup>++</sup> | y*         | y <sup>*++</sup> | y <sup>0</sup> | y <sup>0++</sup> | #  |
|----|-------------------|-------------------|----------------|------------------|------|-------------------|-----------------|------------|------------------|----------------|------------------|----|
| 1  | 100.075690        | 50.541483         |                |                  | V    |                   |                 |            |                  |                |                  | 10 |
| 2  | <b>263.139019</b> | 132.073148        |                |                  | Y    | <b>957.463601</b> | 479.235439      | 940.437052 | 470.722164       | 939.453036     | 470.230156       | 9  |
| 3  | 350.171047        | 175.589161        | 332.160482     | 166.583879       | S    | <b>794.400272</b> | 397.703774      | 777.373723 | 389.190499       | 776.389707     | 388.698491       | 8  |
| 4  | 451.218726        | 226.113001        | 433.208161     | 217.107719       | T    | <b>707.368244</b> | 354.187760      | 690.341695 | 345.674486       | 689.357679     | 345.182478       | 7  |
| 5  | 538.250754        | 269.629015        | 520.240189     | 260.623733       | S    | <b>606.320565</b> | 303.663921      | 589.294016 | 295.150646       | 588.310000     | 294.658638       | 6  |
| 6  | <b>637.319168</b> | <b>319.163222</b> | 619.308603     | 310.157940       | V    | <b>519.288537</b> | 260.147907      | 502.261988 | 251.634632       | 501.277972     | 251.142624       | 5  |
| 7  | 738.366847        | 369.687062        | 720.356282     | 360.681779       | T    | <b>420.220123</b> | 210.613699      | 403.193574 | 202.100425       | 402.209558     | 201.608417       | 4  |
| 8  | <b>795.388311</b> | 398.197794        | 777.377746     | 389.192511       | G    | <b>319.172444</b> | 160.089860      | 302.145895 | 151.576585       | 301.161879     | 151.084577       | 3  |
| 9  | 882.420339        | 441.713808        | 864.409774     | 432.708525       | S    | 262.150980        | 131.579128      | 245.124431 | 123.065853       | 244.140415     | 122.573845       | 2  |
| 10 |                   |                   |                |                  | R    | 175.118952        | 88.063114       | 158.092403 | 79.549839        |                |                  | 1  |

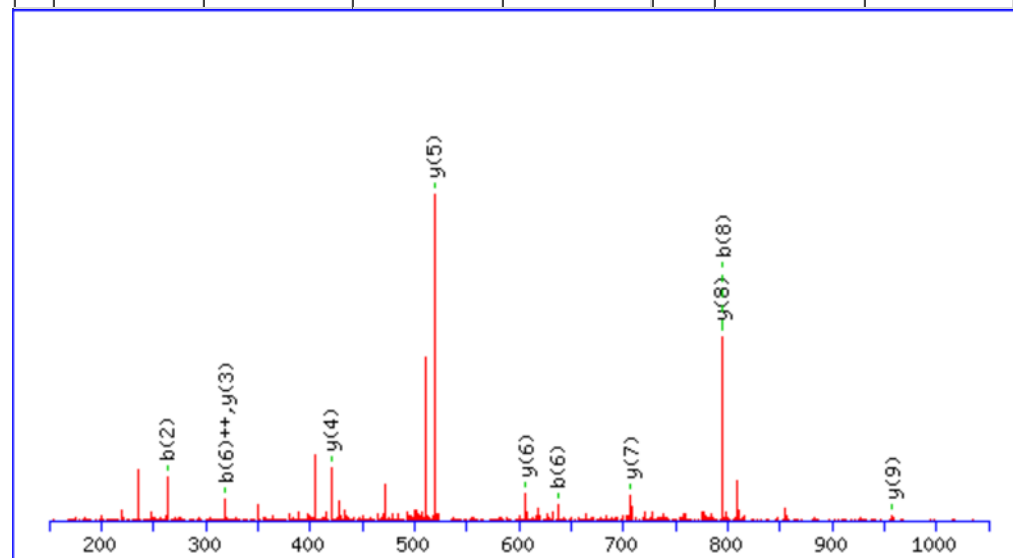

## Peptide View

MS/MS Fragmentation of **DFSLTSSSQTPGATK**

Found in **IPI00291300**, Tax\_Id=9606 Gene\_Symbol=PODXL2 Putative uncharacterized protein PODXL2

**Experiment:** 10 - S\_D-1 **Fraction:** S\_D-1

Match to Query 10726: 1525.725048 from(763.869800,2+)

Title: OECHL100310\_31.10649.10649.2.dta

Data file \\BOROMIR\Masse\Data LTQ-Orbitrap\Chrystelle Lacroix\Etude clinique sJPU\OECHL100310\_31.raw

**Monoisotopic mass of neutral peptide Mr(calc): 1525.726028**Fixed modifications: Carbamidomethyl (C) (apply to specified residues or termini only)**Ions Score: 49****Expect: 0.0013**Matches : 26/150 fragment ions using 52 most intense peaks ([help](#))

| #  | b                  | b <sup>++</sup> | b*                 | b <sup>*++</sup> | b <sup>0</sup>     | b <sup>0++</sup> | Seq. | y                  | y <sup>++</sup> | y*          | y <sup>*++</sup>  | y <sup>0</sup>    | y <sup>0++</sup>  | #  |
|----|--------------------|-----------------|--------------------|------------------|--------------------|------------------|------|--------------------|-----------------|-------------|-------------------|-------------------|-------------------|----|
| 1  | 116.034219         | 58.520748       |                    |                  | 98.023654          | 49.515465        | D    |                    |                 |             |                   |                   |                   | 15 |
| 2  | <b>263.102633</b>  | 132.054954      |                    |                  | 245.092068         | 123.049672       | F    | 1411.706351        | 706.356813      | 1394.679802 | 697.843539        | 1393.695786       | 697.351531        | 14 |
| 3  | 350.134661         | 175.570968      |                    |                  | <b>332.124096</b>  | 166.565686       | S    | 1264.637937        | 632.822607      | 1247.611388 | 624.309332        | 1246.627372       | 623.817324        | 13 |
| 4  | 463.218725         | 232.113001      |                    |                  | <b>445.208160</b>  | 223.107718       | L    | <b>1177.605909</b> | 589.306592      | 1160.579360 | 580.793318        | 1159.595344       | 580.301310        | 12 |
| 5  | <b>564.266404</b>  | 282.636840      |                    |                  | <b>546.255839</b>  | 273.631558       | T    | <b>1064.521845</b> | 532.764561      | 1047.495296 | 524.251286        | 1046.511280       | 523.759278        | 11 |
| 6  | 651.298432         | 326.152854      |                    |                  | 633.287867         | 317.147572       | S    | <b>963.474166</b>  | 482.240721      | 946.447617  | <b>473.727446</b> | <b>945.463601</b> | <b>473.235438</b> | 10 |
| 7  | 738.330460         | 369.668868      |                    |                  | 720.319895         | 360.663586       | S    | <b>876.442138</b>  | 438.724707      | 859.415589  | 430.211432        | 858.431573        | 429.719424        | 9  |
| 8  | <b>825.362488</b>  | 413.184882      |                    |                  | 807.351923         | 404.179599       | S    | 789.410110         | 395.208693      | 772.383561  | 386.695418        | 771.399545        | 386.203410        | 8  |
| 9  | <b>953.421066</b>  | 477.214171      | 936.394517         | 468.700897       | 935.410501         | 468.208889       | Q    | <b>702.378082</b>  | 351.692679      | 685.351533  | 343.179404        | 684.367517        | 342.687396        | 7  |
| 10 | <b>1054.468745</b> | 527.738010      | 1037.442196        | 519.224736       | <b>1036.458180</b> | 518.732728       | T    | <b>574.319504</b>  | 287.663390      | 557.292955  | 279.150115        | 556.308939        | 278.658107        | 6  |
| 11 | <b>1151.521509</b> | 576.264392      | 1134.494960        | 567.751118       | 1133.510944        | 567.259110       | P    | <b>473.271825</b>  | 237.139550      | 456.245276  | 228.626276        | <b>455.261260</b> | 228.134268        | 5  |
| 12 | 1208.542973        | 604.775124      | 1191.516424        | 596.261850       | 1190.532408        | 595.769842       | G    | 376.219061         | 188.613168      | 359.192512  | 180.099894        | 358.208496        | 179.607886        | 4  |
| 13 | <b>1279.580087</b> | 640.293681      | 1262.553538        | 631.780407       | <b>1261.569522</b> | 631.288399       | A    | 319.197597         | 160.102436      | 302.171048  | 151.589162        | 301.187032        | 151.097154        | 3  |
| 14 | <b>1380.627766</b> | 690.817521      | <b>1363.601217</b> | 682.304246       | 1362.617201        | 681.812238       | T    | <b>248.160483</b>  | 124.583879      | 231.133934  | 116.070605        | 230.149918        | 115.578597        | 2  |
| 15 |                    |                 |                    |                  |                    |                  | K    | 147.112804         | 74.060040       | 130.086255  | 65.546765         |                   |                   | 1  |

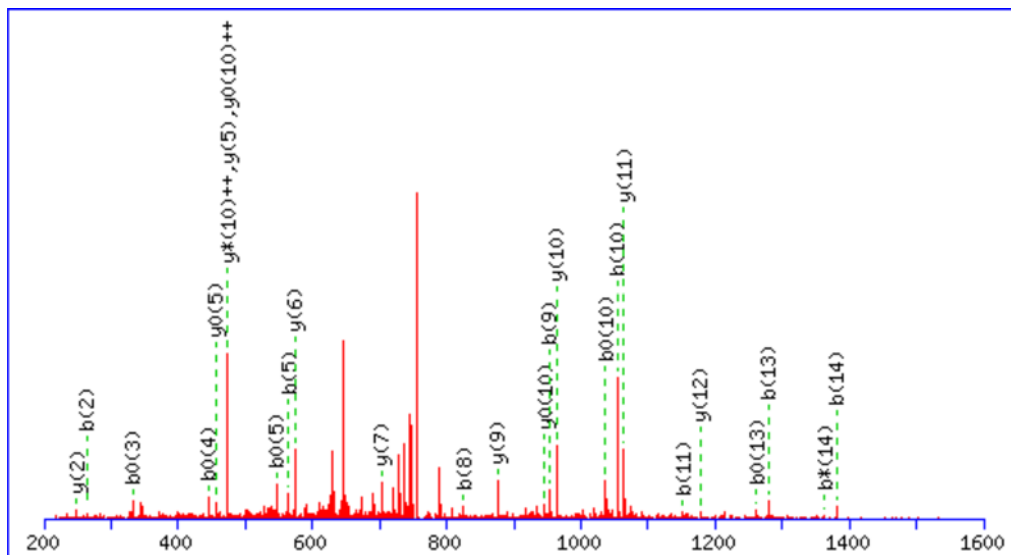

## Peptide View

MS/MS Fragmentation of **TLGDQLSLLGAR**

Found in **IPI00005707**, Tax\_Id=9606 Gene\_Symbol=MRC2 C-type mannose receptor 2

**Experiment:** 10 - S\_D-1 **Fraction:** S\_D-1

Match to Query 8796: 1355.777648 from(678.896100,2+)

Title: OECHL100310\_31.20799.20799.2.dta

Data file \\BOROMIR\Masse\Data LTQ-Orbitrap\Chrystelle Lacroix\Etude clinique sJPU\OECHL100310\_31.raw

**Monoisotopic mass of neutral peptide Mr(calc):** 1355.777252 **Fixed modifications:** Carbamidomethyl (C) (apply to specified residues or termini only) **Ions Score:** 60

**Expect:** 3.3e-005 **Matches :** 28/124 fragment ions using 60 most intense peaks ([help](#))

| # | b                 | b <sup>++</sup> | b*         | b* <sup>++</sup> | b <sup>0</sup> | b <sup>0++</sup> | Seq. | y                  | y <sup>++</sup> | y*                 | y* <sup>++</sup> | y <sup>0</sup>    | y <sup>0++</sup> | #  |
|---|-------------------|-----------------|------------|------------------|----------------|------------------|------|--------------------|-----------------|--------------------|------------------|-------------------|------------------|----|
| 1 | 102.054955        | 51.531116       |            |                  | 84.044390      | 42.525833        | T    |                    |                 |                    |                  |                   |                  | 13 |
| 2 | <b>215.139019</b> | 108.073147      |            |                  | 197.128454     | 99.067865        | L    | 1255.736863        | 628.372069      | 1238.710314        | 619.858795       | 1237.726298       | 619.366787       | 12 |
| 3 | <b>272.160483</b> | 136.583879      |            |                  | 254.149918     | 127.578597       | G    | <b>1142.652799</b> | 571.830038      | <b>1125.626250</b> | 563.316763       | 1124.642234       | 562.824755       | 11 |
| 4 | <b>387.187426</b> | 194.097351      |            |                  | 369.176861     | 185.092069       | D    | <b>1085.631335</b> | 543.319305      | 1068.604786        | 534.806031       | 1067.620770       | 534.314023       | 10 |
| 5 | 515.246004        | 258.126640      | 498.219455 | 249.613366       | 497.235439     | 249.121358       | Q    | <b>970.604392</b>  | 485.805834      | 953.577843         | 477.292559       | <b>952.593827</b> | 476.800551       | 9  |
| 6 | 628.330068        | 314.668672      | 611.303519 | 306.155398       | 610.319503     | 305.663390       | L    | <b>842.545814</b>  | 421.776545      | 825.519265         | 413.263270       | 824.535249        | 412.771262       | 8  |

|    |                    |            |                    |            |                    |            |          |                   |                   |            |            |            |            |          |
|----|--------------------|------------|--------------------|------------|--------------------|------------|----------|-------------------|-------------------|------------|------------|------------|------------|----------|
| 7  | <b>715.362096</b>  | 358.184686 | <b>698.335547</b>  | 349.671412 | <b>697.351531</b>  | 349.179404 | <b>S</b> | <b>729.461750</b> | 365.234513        | 712.435201 | 356.721238 | 711.451185 | 356.229230 | <b>7</b> |
| 8  | <b>828.446160</b>  | 414.726718 | 811.419611         | 406.213444 | <b>810.435595</b>  | 405.721436 | <b>L</b> | <b>642.429722</b> | <b>321.718499</b> | 625.403173 | 313.205224 |            |            | <b>6</b> |
| 9  | <b>941.530224</b>  | 471.268750 | <b>924.503675</b>  | 462.755476 | <b>923.519659</b>  | 462.263468 | <b>L</b> | <b>529.345658</b> | 265.176467        | 512.319109 | 256.663192 |            |            | <b>5</b> |
| 10 | <b>1054.614288</b> | 527.810782 | <b>1037.587739</b> | 519.297508 | <b>1036.603723</b> | 518.805500 | <b>L</b> | <b>416.261594</b> | 208.634435        | 399.235045 | 200.121160 |            |            | <b>4</b> |
| 11 | 1111.635752        | 556.321514 | 1094.609203        | 547.808240 | 1093.625187        | 547.316231 | <b>G</b> | <b>303.177530</b> | 152.092403        | 286.150981 | 143.579128 |            |            | <b>3</b> |
| 12 | 1182.672866        | 591.840071 | 1165.646317        | 583.326797 | <b>1164.662301</b> | 582.834788 | <b>A</b> | <b>246.156066</b> | 123.581671        | 229.129517 | 115.068396 |            |            | <b>2</b> |
| 13 |                    |            |                    |            |                    |            | <b>R</b> | 175.118952        | 88.063114         | 158.092403 | 79.549839  |            |            | <b>1</b> |

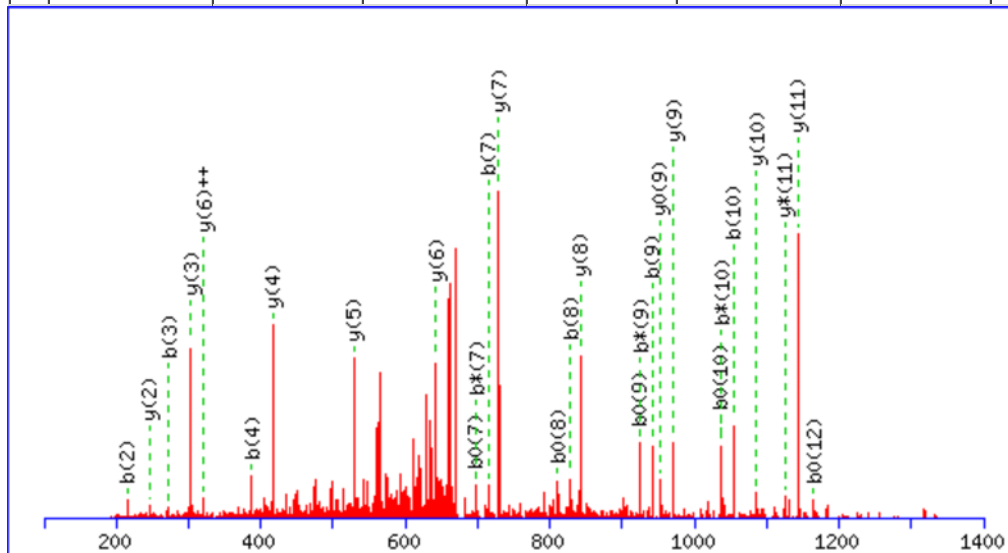

## Peptide View

MS/MS Fragmentation of **FGQGSPIVLDDVR**

Found in **IPI00418512**, Tax\_Id=9606 Gene\_Symbol=DMBT1 Isoform 4 of Deleted in malignant brain tumors 1 protein

**Experiment:** 10 - S\_D-1 **Fraction:** S\_D-1

Match to Query 9837: 1458.746248 from(730.380400,2+)

Title: OECHL100310\_31.15464.15464.2.dta

Data file \\BOROMIR\Masse\Data LTQ-Orbitrap\Chrystelle Lacroix\Etude clinique sJPU\OECHL100310\_31.raw

**Monoisotopic mass of neutral peptide Mr(calc):** 1458.746719 **Fixed modifications:** Carbamidomethyl (C) (apply to specified residues or termini only) **Ions Score:** 60

**Expect:** 0.00011 **Matches :** 17/140 fragment ions using 25 most intense peaks ([help](#))



| #  | b                  | b <sup>++</sup> | b*          | b <sup>*++</sup> | b <sup>0</sup>     | b <sup>0++</sup> | Seq. | y                  | y <sup>++</sup> | y*          | y <sup>*++</sup>  | y <sup>0</sup> | y <sup>0++</sup>  | #  |
|----|--------------------|-----------------|-------------|------------------|--------------------|------------------|------|--------------------|-----------------|-------------|-------------------|----------------|-------------------|----|
| 1  | 148.075690         | 74.541483       |             |                  |                    |                  | F    |                    |                 |             |                   |                |                   | 14 |
| 2  | 205.097154         | 103.052215      |             |                  |                    |                  | G    | 1312.685556        | 656.846416      | 1295.659007 | 648.333142        | 1294.674991    | 647.841134        | 13 |
| 3  | <b>333.155732</b>  | 167.081504      | 316.129183  | 158.568230       |                    |                  | Q    | 1255.664092        | 628.335684      | 1238.637543 | <b>619.822410</b> | 1237.653527    | <b>619.330402</b> | 12 |
| 4  | 390.177196         | 195.592236      | 373.150647  | 187.078961       |                    |                  | G    | <b>1127.605514</b> | 564.306395      | 1110.578965 | 555.793121        | 1109.594949    | 555.301113        | 11 |
| 5  | 477.209224         | 239.108250      | 460.182675  | 230.594976       | 459.198659         | 230.102968       | S    | <b>1070.584050</b> | 535.795663      | 1053.557501 | 527.282389        | 1052.573485    | 526.790381        | 10 |
| 6  | 534.230688         | 267.618982      | 517.204139  | 259.105708       | 516.220123         | 258.613700       | G    | <b>983.552022</b>  | 492.279649      | 966.525473  | 483.766375        | 965.541457     | 483.274367        | 9  |
| 7  | 631.283452         | 316.145364      | 614.256903  | 307.632090       | 613.272887         | 307.140082       | P    | <b>926.530558</b>  | 463.768917      | 909.504009  | 455.255643        | 908.519993     | 454.763635        | 8  |
| 8  | 744.367516         | 372.687396      | 727.340967  | 364.174122       | 726.356951         | 363.682114       | I    | 829.477794         | 415.242535      | 812.451245  | 406.729261        | 811.467229     | 406.237253        | 7  |
| 9  | <b>843.435930</b>  | 422.221603      | 826.409381  | 413.708329       | <b>825.425365</b>  | 413.216321       | V    | 716.393730         | 358.700503      | 699.367181  | 350.187229        | 698.383165     | 349.695221        | 6  |
| 10 | 956.519994         | 478.763635      | 939.493445  | 470.250361       | 938.509429         | 469.758353       | L    | <b>617.325316</b>  | 309.166296      | 600.298767  | 300.653022        | 599.314751     | 300.161014        | 5  |
| 11 | <b>1071.546937</b> | 536.277107      | 1054.520388 | 527.763832       | 1053.536372        | 527.271824       | D    | <b>504.241252</b>  | 252.624264      | 487.214703  | 244.110990        | 486.230687     | 243.618982        | 4  |
| 12 | <b>1186.573880</b> | 593.790578      | 1169.547331 | 585.277304       | 1168.563315        | 584.785296       | D    | <b>389.214309</b>  | 195.110793      | 372.187760  | 186.597518        | 371.203744     | 186.105510        | 3  |
| 13 | <b>1285.642294</b> | 643.324785      | 1268.615745 | 634.811511       | <b>1267.631729</b> | 634.319503       | V    | <b>274.187366</b>  | 137.597321      | 257.160817  | 129.084047        |                |                   | 2  |
| 14 |                    |                 |             |                  |                    |                  | R    | 175.118952         | 88.063114       | 158.092403  | 79.549839         |                |                   | 1  |

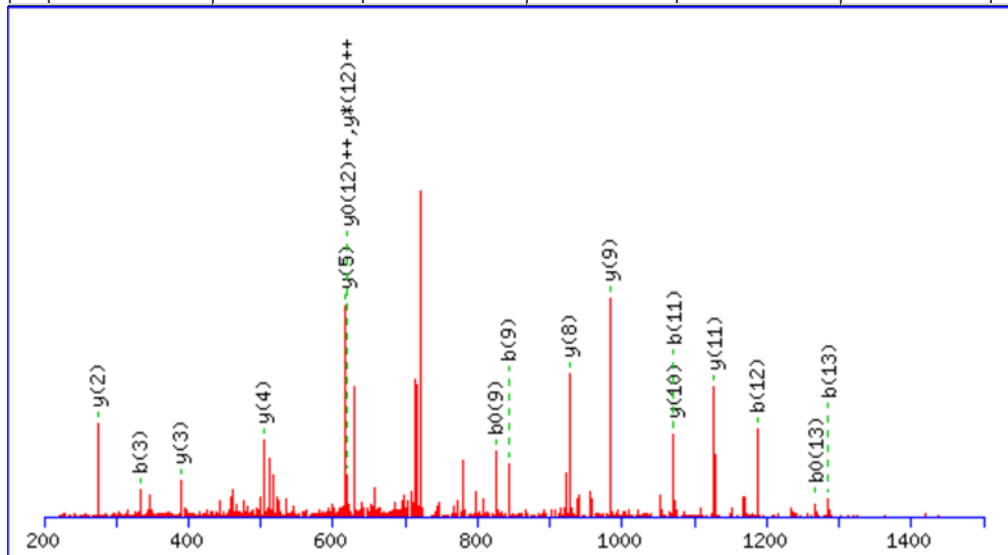

## Peptide View

MS/MS Fragmentation of **LKDDEVAQLKK**Found in **IPI00219217**, Tax\_Id=9606 Gene\_Symbol=LDHB L-lactate dehydrogenase B chain**Experiment:** 10 - S\_D-1 **Fraction:** S\_D-1

Match to Query 7784: 1285.724048 from(643.869300,2+)

Title: OECHL100310\_31.4431.4431.2.dta

Data file \\BOROMIR\Masse\Data LTQ-Orbitrap\Chrystelle Lacroix\Etude clinique sJPU\OECHL100310\_31.raw

**Monoisotopic mass of neutral peptide Mr(calc):** 1285.724136 **Fixed modifications:** Carbamidomethyl (C) (apply to specified residues or termini only) **Ions Score:** 50**Expect:** 0.00057 **Matches :** 16/102 fragment ions using 33 most intense peaks ([help](#))

| #  | b                  | b <sup>++</sup> | b <sup>*</sup> | b <sup>*++</sup> | b <sup>0</sup> | b <sup>0++</sup> | Seq. | y                  | y <sup>++</sup>   | y <sup>*</sup>    | y <sup>*++</sup> | y <sup>0</sup> | y <sup>0++</sup> | #  |
|----|--------------------|-----------------|----------------|------------------|----------------|------------------|------|--------------------|-------------------|-------------------|------------------|----------------|------------------|----|
| 1  | 114.091340         | 57.549308       |                |                  |                |                  | L    |                    |                   |                   |                  |                |                  | 11 |
| 2  | <b>242.186303</b>  | 121.596790      | 225.159754     | 113.083515       |                |                  | K    | 1173.647379        | <b>587.327328</b> | 1156.620830       | 578.814053       | 1155.636814    | 578.322045       | 10 |
| 3  | <b>357.213246</b>  | 179.110261      | 340.186697     | 170.596987       | 339.202681     | 170.104979       | D    | <b>1045.552416</b> | 523.279846        | 1028.525867       | 514.766572       | 1027.541851    | 514.274564       | 9  |
| 4  | <b>472.240189</b>  | 236.623733      | 455.213640     | 228.110458       | 454.229624     | 227.618450       | D    | <b>930.525473</b>  | 465.766375        | <b>913.498924</b> | 457.253100       | 912.514908     | 456.761092       | 8  |
| 5  | 601.282782         | 301.145029      | 584.256233     | 292.631755       | 583.272217     | 292.139747       | E    | <b>815.498530</b>  | 408.252903        | 798.471981        | 399.739629       | 797.487965     | 399.247621       | 7  |
| 6  | <b>700.351196</b>  | 350.679236      | 683.324647     | 342.165962       | 682.340631     | 341.673954       | V    | <b>686.455937</b>  | 343.731607        | 669.429388        | 335.218332       |                |                  | 6  |
| 7  | <b>771.388310</b>  | 386.197793      | 754.361761     | 377.684519       | 753.377745     | 377.192511       | A    | <b>587.387523</b>  | 294.197400        | 570.360974        | 285.684125       |                |                  | 5  |
| 8  | <b>899.446888</b>  | 450.227082      | 882.420339     | 441.713808       | 881.436323     | 441.221800       | Q    | 516.350409         | 258.678843        | 499.323860        | 250.165568       |                |                  | 4  |
| 9  | <b>1012.530952</b> | 506.769114      | 995.504403     | 498.255840       | 994.520387     | 497.763832       | L    | 388.291831         | 194.649554        | 371.265282        | 186.136279       |                |                  | 3  |
| 10 | <b>1140.625915</b> | 570.816596      | 1123.599366    | 562.303321       | 1122.615350    | 561.811313       | K    | <b>275.207767</b>  | 138.107521        | 258.181218        | 129.594247       |                |                  | 2  |
| 11 |                    |                 |                |                  |                |                  | K    | 147.112804         | 74.060040         | 130.086255        | 65.546765        |                |                  | 1  |

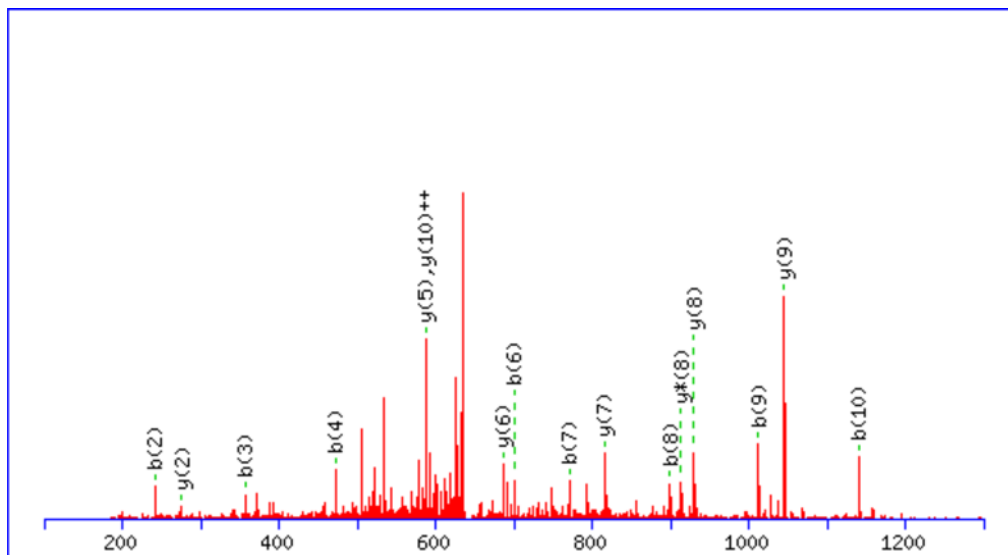

## Peptide View

MS/MS Fragmentation of **ASGVPDFRFSGSGTDFTLK**

Found in **IPI00387107**, Tax\_Id=9606 Gene\_Symbol=IGKV2-40 Ig kappa chain V-II region Cum

**Experiment:** 10 - S\_D-1 **Fraction:** S\_D-1

Match to Query 15026: 1984.949448 from(993.482000,2+)

Title: OECHL100310\_31.13595.13595.2.dta

Data file \\BOROMIR\Masse\Data LTQ-Orbitrap\Chrystelle Lacroix\Etude clinique sJPU\OECHL100310\_31.raw

**Monoisotopic mass of neutral peptide Mr(calc):** 1984.949066 **Fixed modifications:** Carbamidomethyl (C) (apply to specified residues or termini only) **Ions Score:** 57

**Expect:** 0.0003 **Matches :** 40/210 fragment ions using 81 most intense peaks ([help](#))

| # | b          | b <sup>++</sup> | b* | b <sup>*++</sup> | b <sup>0</sup> | b <sup>0++</sup> | Seq. | y           | y <sup>++</sup> | y*          | y <sup>*++</sup> | y <sup>0</sup> | y <sup>0++</sup> | #  |
|---|------------|-----------------|----|------------------|----------------|------------------|------|-------------|-----------------|-------------|------------------|----------------|------------------|----|
| 1 | 72.044390  | 36.525833       |    |                  |                |                  | A    |             |                 |             |                  |                |                  | 20 |
| 2 | 159.076418 | 80.041847       |    |                  | 141.065853     | 71.036564        | S    | 1914.919197 | 957.963236      | 1897.892648 | 949.449962       | 1896.908632    | 948.957954       | 19 |
| 3 | 216.097882 | 108.552579      |    |                  | 198.087317     | 99.547296        | G    | 1827.887169 | 914.447222      | 1810.860620 | 905.933948       | 1809.876604    | 905.441940       | 18 |
| 4 | 315.166296 | 158.086786      |    |                  | 297.155731     | 149.081504       | V    | 1770.865705 | 885.936490      | 1753.839156 | 877.423216       | 1752.855140    | 876.931208       | 17 |
| 5 | 412.219060 | 206.613168      |    |                  | 394.208495     | 197.607885       | P    | 1671.797291 | 836.402283      | 1654.770742 | 827.889009       | 1653.786726    | 827.397001       | 16 |
| 6 | 527.246003 | 264.126640      |    |                  | 509.235438     | 255.121357       | D    | 1574.744527 | 787.875902      | 1557.717978 | 779.362627       | 1556.733962    | 778.870619       | 15 |

|    |                    |            |                    |                   |                    |                   |          |                    |                   |             |                   |                   |                   |           |
|----|--------------------|------------|--------------------|-------------------|--------------------|-------------------|----------|--------------------|-------------------|-------------|-------------------|-------------------|-------------------|-----------|
| 7  | <b>683.347114</b>  | 342.177195 | 666.320565         | 333.663920        | <b>665.336549</b>  | 333.171912        | <b>R</b> | <b>1459.717584</b> | <b>730.362430</b> | 1442.691035 | <b>721.849156</b> | 1441.707019       | <b>721.357148</b> | <b>14</b> |
| 8  | <b>830.415528</b>  | 415.711402 | 813.388979         | 407.198127        | 812.404963         | 406.706119        | <b>F</b> | <b>1303.616473</b> | 652.311875        | 1286.589924 | 643.798600        | 1285.605908       | 643.306592        | <b>13</b> |
| 9  | <b>917.447556</b>  | 459.227416 | 900.421007         | 450.714141        | 899.436991         | 450.222133        | <b>S</b> | <b>1156.548059</b> | 578.777668        | 1139.521510 | 570.264393        | 1138.537494       | 569.772385        | <b>12</b> |
| 10 | 974.469020         | 487.738148 | 957.442471         | 479.224873        | 956.458455         | 478.732865        | <b>G</b> | <b>1069.516031</b> | 535.261654        | 1052.489482 | 526.748379        | 1051.505466       | 526.256371        | <b>11</b> |
| 11 | <b>1061.501048</b> | 531.254162 | 1044.474499        | 522.740887        | 1043.490483        | 522.248879        | <b>S</b> | 1012.494567        | 506.750922        | 995.468018  | 498.237647        | 994.484002        | 497.745639        | <b>10</b> |
| 12 | <b>1118.522512</b> | 559.764894 | 1101.495963        | 551.251619        | 1100.511947        | 550.759611        | <b>G</b> | 925.462539         | 463.234908        | 908.435990  | 454.721633        | 907.451974        | 454.229625        | <b>9</b>  |
| 13 | <b>1205.554540</b> | 603.280908 | 1188.527991        | 594.767633        | 1187.543975        | 594.275625        | <b>S</b> | 868.441075         | 434.724176        | 851.414526  | 426.210901        | 850.430510        | 425.718893        | <b>8</b>  |
| 14 | <b>1262.576004</b> | 631.791640 | 1245.549455        | <b>623.278365</b> | 1244.565439        | <b>622.786357</b> | <b>G</b> | 781.409047         | 391.208162        | 764.382498  | 382.694887        | <b>763.398482</b> | 382.202879        | <b>7</b>  |
| 15 | <b>1363.623683</b> | 682.315479 | 1346.597134        | 673.802205        | <b>1345.613118</b> | 673.310197        | <b>T</b> | 724.387583         | 362.697430        | 707.361034  | 354.184155        | 706.377018        | 353.692147        | <b>6</b>  |
| 16 | <b>1478.650626</b> | 739.828951 | 1461.624077        | 731.315677        | <b>1460.640061</b> | <b>730.823668</b> | <b>D</b> | <b>623.339904</b>  | 312.173590        | 606.313355  | 303.660316        | 605.329339        | 303.168308        | <b>5</b>  |
| 17 | <b>1625.719040</b> | 813.363158 | 1608.692491        | 804.849884        | 1607.708475        | 804.357875        | <b>F</b> | <b>508.312961</b>  | 254.660118        | 491.286412  | 246.146844        | <b>490.302396</b> | 245.654836        | <b>4</b>  |
| 18 | <b>1726.766719</b> | 863.886998 | 1709.740170        | <b>855.373723</b> | <b>1708.756154</b> | <b>854.881715</b> | <b>T</b> | <b>361.244547</b>  | 181.125911        | 344.217998  | 172.612637        | 343.233982        | 172.120629        | <b>3</b>  |
| 19 | <b>1839.850783</b> | 920.429029 | <b>1822.824234</b> | 911.915755        | 1821.840218        | 911.423747        | <b>L</b> | 260.196868         | 130.602072        | 243.170319  | 122.088797        |                   |                   | <b>2</b>  |
| 20 |                    |            |                    |                   |                    |                   | <b>K</b> | 147.112804         | 74.060040         | 130.086255  | 65.546765         |                   |                   | <b>1</b>  |

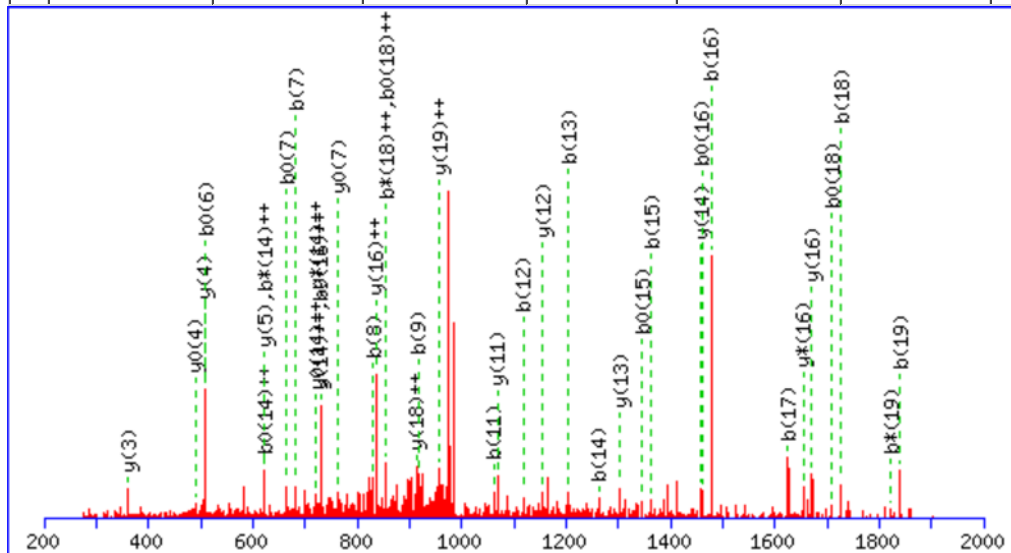

## Peptide View

MS/MS Fragmentation of **RGVSQAPTAAR**Found in **IPI00025365**, Tax\_Id=9606 Gene\_Symbol=EDN3 Isoform Long of Endothelin-3**Experiment:** 10 - S\_D-1 **Fraction:** S\_D-1

Match to Query 5196: 1112.605048 from(557.309800,2+)

Title: OECHL100310\_31.2131.2131.2.dta

Data file \\BOROMIR\Masse\Data LTQ-Orbitrap\Chrystelle Lacroix\Etude clinique sJPU\OECHL100310\_31.raw

**Monoisotopic mass of neutral peptide Mr(calc):** 1112.605042 **Fixed modifications:** Carbamidomethyl (C) (apply to specified residues or termini only) **Ions Score:** 52**Expect:** 0.00045 **Matches :** 29/108 fragment ions using 57 most intense peaks ([help](#))

| #         | b                 | b <sup>++</sup>   | b <sup>*</sup>    | b <sup>*++</sup>  | b <sup>0</sup>    | b <sup>0++</sup>  | Seq.     | y                 | y <sup>++</sup> | y <sup>*</sup>    | y <sup>*++</sup> | y <sup>0</sup>    | y <sup>0++</sup> | #         |
|-----------|-------------------|-------------------|-------------------|-------------------|-------------------|-------------------|----------|-------------------|-----------------|-------------------|------------------|-------------------|------------------|-----------|
| <b>1</b>  | 157.108387        | 79.057831         | 140.081838        | 70.544557         |                   |                   | <b>R</b> |                   |                 |                   |                  |                   |                  | <b>11</b> |
| <b>2</b>  | 214.129851        | 107.568564        | <b>197.103302</b> | 99.055289         |                   |                   | <b>G</b> | <b>957.511221</b> | 479.259249      | <b>940.484672</b> | 470.745974       | <b>939.500656</b> | 470.253966       | <b>10</b> |
| <b>3</b>  | <b>313.198265</b> | 157.102770        | 296.171716        | 148.589496        |                   |                   | <b>V</b> | <b>900.489757</b> | 450.748517      | 883.463208        | 442.235242       | 882.479192        | 441.743234       | <b>9</b>  |
| <b>4</b>  | <b>400.230293</b> | 200.618785        | 383.203744        | 192.105510        | <b>382.219728</b> | 191.613502        | <b>S</b> | <b>801.421343</b> | 401.214310      | 784.394794        | 392.701035       | 783.410778        | 392.209027       | <b>8</b>  |
| <b>5</b>  | <b>528.288871</b> | 264.648074        | 511.262322        | 256.134799        | 510.278306        | 255.642791        | <b>Q</b> | <b>714.389315</b> | 357.698296      | <b>697.362766</b> | 349.185021       | 696.378750        | 348.693013       | <b>7</b>  |
| <b>6</b>  | <b>599.325985</b> | <b>300.166631</b> | 582.299436        | 291.653356        | 581.315420        | 291.161348        | <b>A</b> | <b>586.330737</b> | 293.669007      | 569.304188        | 285.155732       | 568.320172        | 284.663724       | <b>6</b>  |
| <b>7</b>  | 696.378749        | 348.693013        | 679.352200        | 340.179738        | 678.368184        | 339.687730        | <b>P</b> | <b>515.293623</b> | 258.150450      | 498.267074        | 249.637175       | 497.283058        | 249.145167       | <b>5</b>  |
| <b>8</b>  | <b>797.426428</b> | 399.216852        | <b>780.399879</b> | 390.703578        | 779.415863        | 390.211570        | <b>T</b> | 418.240859        | 209.624068      | 401.214310        | 201.110793       | <b>400.230294</b> | 200.618785       | <b>4</b>  |
| <b>9</b>  | <b>868.463542</b> | <b>434.735409</b> | 851.436993        | <b>426.222135</b> | 850.452977        | <b>425.730127</b> | <b>A</b> | <b>317.193180</b> | 159.100228      | <b>300.166631</b> | 150.586953       |                   |                  | <b>3</b>  |
| <b>10</b> | <b>939.500656</b> | 470.253966        | 922.474107        | 461.740692        | 921.490091        | 461.248684        | <b>A</b> | <b>246.156066</b> | 123.581671      | <b>229.129517</b> | 115.068397       |                   |                  | <b>2</b>  |
| <b>11</b> |                   |                   |                   |                   |                   |                   | <b>R</b> | <b>175.118952</b> | 88.063114       | 158.092403        | 79.549840        |                   |                  | <b>1</b>  |

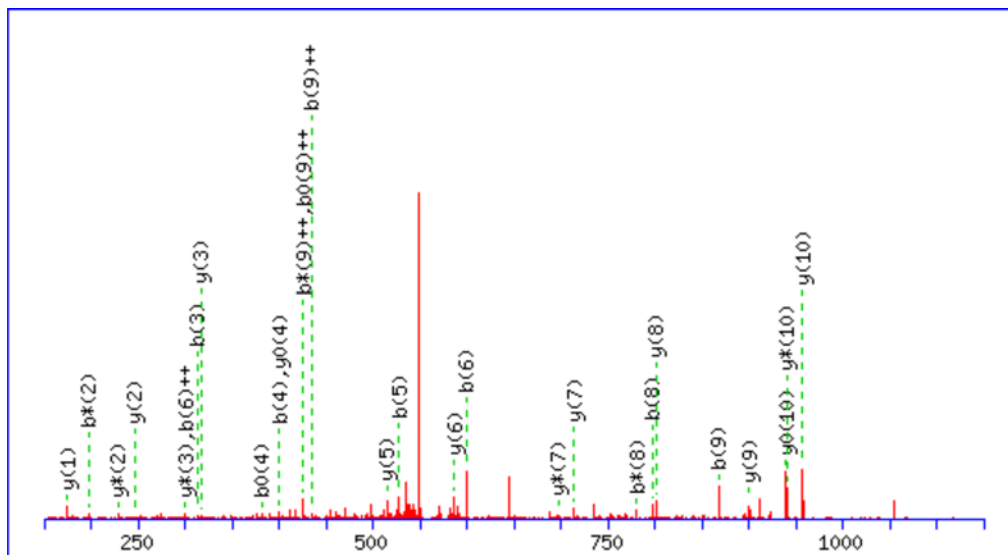

## Peptide View

MS/MS Fragmentation of **AVGLLTVISK**

Found in **IPI00013446**, Tax\_Id=9606 Gene\_Symbol=PSCA Prostate stem cell antigen

**Experiment:** 55 - PyD-1 **Fraction:** PyD-1

Match to Query 2990: 999.633648 from(500.824100,2+)

Title: OECHL100310\_29.16908.16908.2.dta

Data file \\BOROMIR\Masse\Data LTQ-Orbitrap\Chrystelle Lacroix\Etude clinique sJPU\OECHL100310\_29.raw

**Monoisotopic mass of neutral peptide Mr(calc):** 999.632828 **Fixed modifications:** Carbamidomethyl (C) (apply to specified residues or termini only) **Ions Score:** 62

**Expect:** 8e-006 **Matches :** 15/78 fragment ions using 27 most intense peaks ([help](#))

| # | b                 | b <sup>++</sup>   | b <sup>0</sup> | b <sup>0++</sup> | Seq. | y                 | y <sup>++</sup>   | y*         | y <sup>*++</sup> | y <sup>0</sup> | y <sup>0++</sup> | #  |
|---|-------------------|-------------------|----------------|------------------|------|-------------------|-------------------|------------|------------------|----------------|------------------|----|
| 1 | 72.044390         | 36.525833         |                |                  | A    |                   |                   |            |                  |                |                  | 10 |
| 2 | <b>171.112804</b> | 86.060040         |                |                  | V    | 929.602995        | 465.305136        | 912.576446 | 456.791861       | 911.592430     | 456.299853       | 9  |
| 3 | <b>228.134268</b> | 114.570772        |                |                  | G    | <b>830.534581</b> | 415.770929        | 813.508032 | 407.257654       | 812.524016     | 406.765646       | 8  |
| 4 | <b>341.218332</b> | <b>171.112804</b> |                |                  | L    | 773.513117        | <b>387.260197</b> | 756.486568 | 378.746922       | 755.502552     | 378.254914       | 7  |
| 5 | <b>454.302396</b> | 227.654836        |                |                  | L    | <b>660.429053</b> | 330.718165        | 643.402504 | 322.204890       | 642.418488     | 321.712882       | 6  |
| 6 | <b>555.350075</b> | 278.178676        | 537.339510     | 269.173393       | T    | <b>547.344989</b> | 274.176133        | 530.318440 | 265.662858       | 529.334424     | 265.170850       | 5  |

|    |            |            |            |            |   |            |            |            |            |            |            |   |
|----|------------|------------|------------|------------|---|------------|------------|------------|------------|------------|------------|---|
| 7  | 654.418489 | 327.712883 | 636.407924 | 318.707600 | V | 446.297310 | 223.652293 | 429.270761 | 215.139018 | 428.286745 | 214.647010 | 4 |
| 8  | 767.502553 | 384.254915 | 749.491988 | 375.249632 | I | 347.228896 | 174.118086 | 330.202347 | 165.604811 | 329.218331 | 165.112803 | 3 |
| 9  | 854.534581 | 427.770929 | 836.524016 | 418.765646 | S | 234.144832 | 117.576054 | 217.118283 | 109.062779 | 216.134267 | 108.570771 | 2 |
| 10 |            |            |            |            | K | 147.112804 | 74.060040  | 130.086255 | 65.546765  |            |            | 1 |

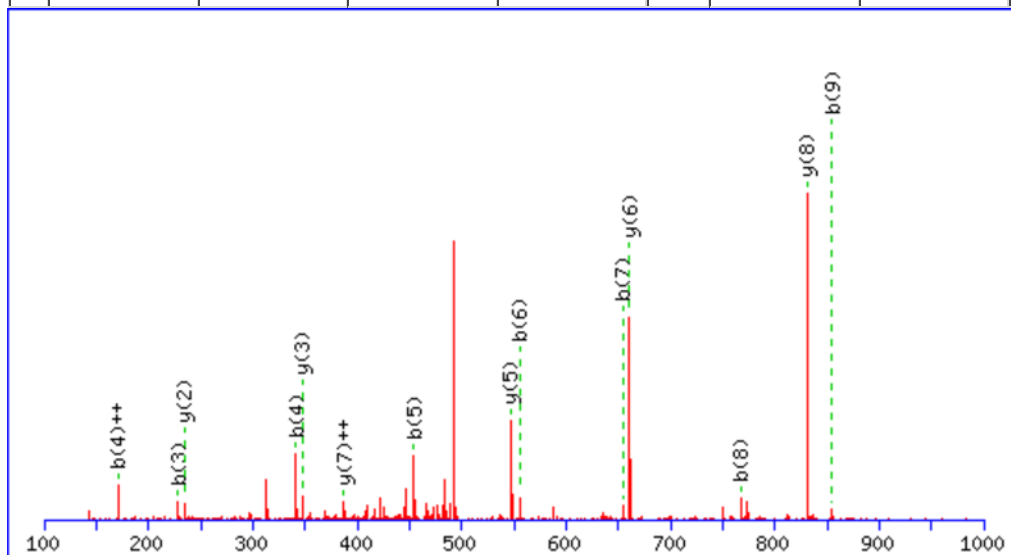

## Peptide View

MS/MS Fragmentation of **MVTAVASALSSR**

Found in **IP100220706**, Tax\_Id=9606 Gene\_Symbol=HBG2;HBG1 Hemoglobin subunit gamma-1

**Experiment:** 55 - PyD-1 **Fraction:** PyD-1

Match to Query 5920: 1207.624448 from(604.819500,2+)

Title: OECHL100310\_29.10249.10249.2.dta

Data file \\BOROMIR\Masse\Data LTQ-Orbitrap\Chrystelle Lacroix\Etude clinique sJPU\OECHL100310\_29.raw

**Monoisotopic mass of neutral peptide Mr(calc):** 1207.623062 **Fixed modifications:** Carbamidomethyl (C) (apply to specified residues or termini only) **Variable modifications:** M1 : Oxidation (M), with neutral loss 63.998285 **Ions Score:** 58 **Expect:** 0.00013 **Matches :** 9/104 fragment ions using 21 most intense peaks ([help](#))

| # | b          | b <sup>++</sup> | b <sup>0</sup> | b <sup>0++</sup> | Seq. | y           | y <sup>++</sup> | y <sup>*</sup> | y <sup>*++</sup> | y <sup>0</sup> | y <sup>0++</sup> | #  |
|---|------------|-----------------|----------------|------------------|------|-------------|-----------------|----------------|------------------|----------------|------------------|----|
| 1 | 84.044391  | 42.525833       |                |                  | M    |             |                 |                |                  |                |                  | 12 |
| 2 | 183.112805 | 92.060040       |                |                  | V    | 1061.594949 | 531.301113      | 1044.568400    | 522.787838       | 1043.584384    | 522.295830       | 11 |

|    |            |            |            |            |   |            |            |            |            |            |            |    |
|----|------------|------------|------------|------------|---|------------|------------|------------|------------|------------|------------|----|
| 3  | 284.160484 | 142.583880 | 266.149919 | 133.578598 | T | 962.526535 | 481.766906 | 945.499986 | 473.253631 | 944.515970 | 472.761623 | 10 |
| 4  | 355.197598 | 178.102437 | 337.187033 | 169.097155 | A | 861.478856 | 431.243066 | 844.452307 | 422.729791 | 843.468291 | 422.237783 | 9  |
| 5  | 454.266012 | 227.636644 | 436.255447 | 218.631362 | V | 790.441742 | 395.724509 | 773.415193 | 387.211234 | 772.431177 | 386.719226 | 8  |
| 6  | 525.303126 | 263.155201 | 507.292561 | 254.149919 | A | 691.373328 | 346.190302 | 674.346779 | 337.677028 | 673.362763 | 337.185020 | 7  |
| 7  | 612.335154 | 306.671215 | 594.324589 | 297.665933 | S | 620.336214 | 310.671745 | 603.309665 | 302.158471 | 602.325649 | 301.666463 | 6  |
| 8  | 683.372268 | 342.189772 | 665.361703 | 333.184489 | A | 533.304186 | 267.155731 | 516.277637 | 258.642457 | 515.293621 | 258.150449 | 5  |
| 9  | 796.456332 | 398.731804 | 778.445767 | 389.726521 | L | 462.267072 | 231.637174 | 445.240523 | 223.123899 | 444.256507 | 222.631891 | 4  |
| 10 | 883.488360 | 442.247818 | 865.477795 | 433.242535 | S | 349.183008 | 175.095142 | 332.156459 | 166.581867 | 331.172443 | 166.089859 | 3  |
| 11 | 970.520388 | 485.763832 | 952.509823 | 476.758549 | S | 262.150980 | 131.579128 | 245.124431 | 123.065854 | 244.140415 | 122.573846 | 2  |
| 12 |            |            |            |            | R | 175.118952 | 88.063114  | 158.092403 | 79.549839  |            |            | 1  |

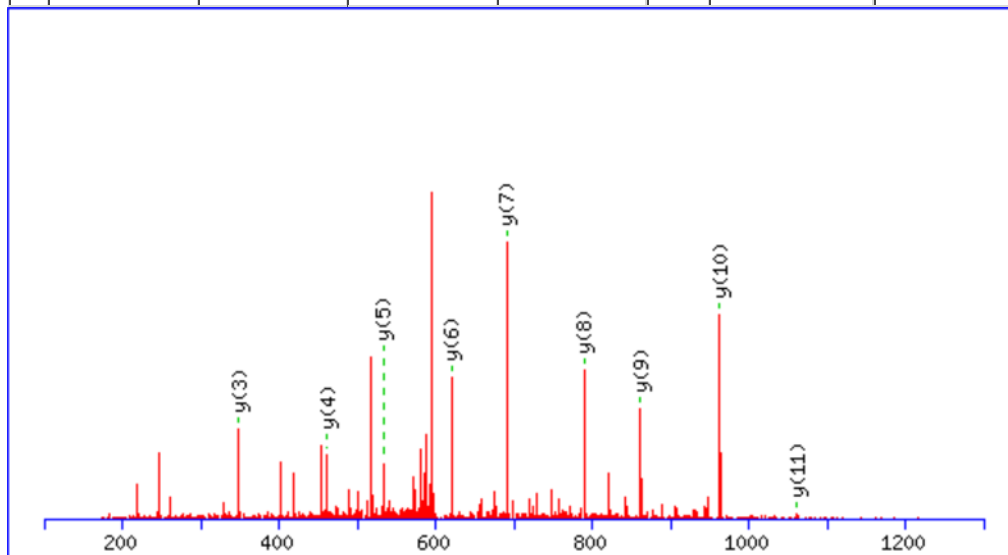

## Peptide View

MS/MS Fragmentation of **LLIYDASNLETGVPSR**

Found in **IP100003111**, Tax\_Id=9606 Gene\_Symbol=LOC652694 Ig kappa chain V-I region AU

**Experiment:** 55 - PyD-1 **Fraction:** PyD-1

Match to Query 12206: 1746.918648 from(874.466600,2+)



Title: OECHL100310\_29.16918.16918.2.dta

Data file \\BOROMIR\Masse\Data LTQ-Orbitrap\Chrystelle Lacroix\Etude clinique sJPU\OECHL100310\_29.raw

**Monoisotopic mass of neutral peptide Mr(calc):** 1746.915192**Fixed modifications:** Carbamidomethyl (C) (apply to specified residues or termini only)**Ions Score:** 84**Expect:** 4.8e-007**Matches :** 34/156 fragment ions using 57 most intense peaks ([help](#))

| #  | b                  | b <sup>++</sup>   | b*                 | b <sup>*++</sup> | b <sup>0</sup>     | b <sup>0++</sup> | Seq. | y                  | y <sup>++</sup>   | y*                | y <sup>*++</sup> | y <sup>0</sup>     | y <sup>0++</sup> | #  |
|----|--------------------|-------------------|--------------------|------------------|--------------------|------------------|------|--------------------|-------------------|-------------------|------------------|--------------------|------------------|----|
| 1  | 114.091340         | 57.549308         |                    |                  |                    |                  | L    |                    |                   |                   |                  |                    |                  | 16 |
| 2  | 227.175404         | 114.091340        |                    |                  |                    |                  | L    | 1634.838427        | 817.922852        | 1617.811878       | 809.409577       | 1616.827862        | 808.917569       | 15 |
| 3  | <b>340.259468</b>  | 170.633372        |                    |                  |                    |                  | I    | <b>1521.754363</b> | <b>761.380820</b> | 1504.727814       | 752.867545       | 1503.743798        | 752.375537       | 14 |
| 4  | <b>503.322797</b>  | 252.165036        |                    |                  |                    |                  | Y    | 1408.670299        | 704.838788        | 1391.643750       | 696.325513       | <b>1390.659734</b> | 695.833505       | 13 |
| 5  | <b>618.349740</b>  | 309.678508        |                    |                  | 600.339175         | 300.673226       | D    | <b>1245.606970</b> | 623.307123        | 1228.580421       | 614.793849       | 1227.596405        | 614.301841       | 12 |
| 6  | <b>689.386854</b>  | 345.197065        |                    |                  | 671.376289         | 336.191782       | A    | <b>1130.580027</b> | 565.793652        | 1113.553478       | 557.280377       | 1112.569462        | 556.788369       | 11 |
| 7  | 776.418882         | 388.713079        |                    |                  | 758.408317         | 379.707796       | S    | <b>1059.542913</b> | 530.275095        | 1042.516364       | 521.761820       | 1041.532348        | 521.269812       | 10 |
| 8  | 890.461809         | 445.734542        | 873.435260         | 437.221268       | 872.451244         | 436.729260       | N    | <b>972.510885</b>  | 486.759081        | 955.484336        | 478.245806       | 954.500320         | 477.753798       | 9  |
| 9  | <b>1003.545873</b> | 502.276574        | <b>986.519324</b>  | 493.763300       | 985.535308         | 493.271292       | L    | <b>858.467958</b>  | 429.737617        | 841.441409        | 421.224343       | 840.457393         | 420.732335       | 8  |
| 10 | <b>1132.588466</b> | 566.797871        | 1115.561917        | 558.284597       | 1114.577901        | 557.792588       | E    | <b>745.383894</b>  | 373.195585        | 728.357345        | 364.682311       | <b>727.373329</b>  | 364.190303       | 7  |
| 11 | <b>1233.636145</b> | <b>617.321710</b> | 1216.609596        | 608.808436       | 1215.625580        | 608.316428       | T    | <b>616.341301</b>  | 308.674289        | 599.314752        | 300.161014       | 598.330736         | 299.669006       | 6  |
| 12 | <b>1290.657609</b> | 645.832442        | 1273.631060        | 637.319168       | 1272.647044        | 636.827160       | G    | <b>515.293622</b>  | 258.150449        | 498.267073        | 249.637175       | 497.283057         | 249.145167       | 5  |
| 13 | <b>1389.726023</b> | 695.366649        | <b>1372.699474</b> | 686.853375       | <b>1371.715458</b> | 686.361367       | V    | <b>458.272158</b>  | 229.639717        | 441.245609        | 221.126443       | <b>440.261593</b>  | 220.634435       | 4  |
| 14 | <b>1486.778787</b> | 743.893032        | 1469.752238        | 735.379757       | 1468.768222        | 734.887749       | P    | <b>359.203744</b>  | 180.105510        | <b>342.177195</b> | 171.592236       | <b>341.193179</b>  | 171.100228       | 3  |
| 15 | <b>1573.810815</b> | 787.409046        | <b>1556.784266</b> | 778.895771       | <b>1555.800250</b> | 778.403763       | S    | 262.150980         | 131.579128        | 245.124431        | 123.065854       | 244.140415         | 122.573846       | 2  |
| 16 |                    |                   |                    |                  |                    |                  | R    | 175.118952         | 88.063114         | 158.092403        | 79.549839        |                    |                  | 1  |

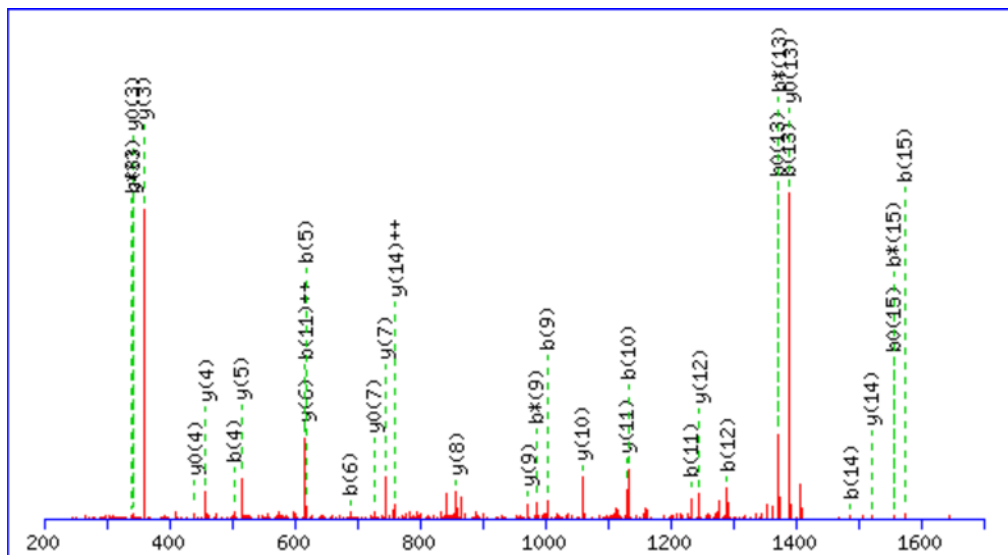

## Peptide View

MS/MS Fragmentation of **APVILGSPDDVLEFLK**

Found in **IPI00073772**, Tax\_Id=9606 Gene\_Symbol=FBP1 Fructose-1,6-bisphosphatase 1

**Experiment:** 55 - PyD-1 **Fraction:** PyD-1

Match to Query 11971: 1711.940848 from(856.977700,2+)

Title: OECHL100310\_29.22145.22145.2.dta

Data file \\BOROMIR\Masse\Data LTQ-Orbitrap\Chrystelle Lacroix\Etude clinique sJPU\OECHL100310\_29.raw

**Monoisotopic mass of neutral peptide Mr(calc):** 1711.939636 **Fixed modifications:** Carbamidomethyl (C) (apply to specified residues or termini only) **Ions Score:** 89

**Expect:** 8.8e-008 **Matches :** 27/132 fragment ions using 42 most intense peaks ([help](#))

| # | b                 | b <sup>++</sup> | b <sup>0</sup> | b <sup>0++</sup> | Seq. | y                  | y <sup>++</sup>   | y*          | y <sup>*++</sup>  | y <sup>0</sup> | y <sup>0++</sup>  | #  |
|---|-------------------|-----------------|----------------|------------------|------|--------------------|-------------------|-------------|-------------------|----------------|-------------------|----|
| 1 | 72.044390         | 36.525833       |                |                  | A    |                    |                   |             |                   |                |                   | 16 |
| 2 | 169.097154        | 85.052215       |                |                  | P    | 1641.909801        | 821.458538        | 1624.883252 | 812.945264        | 1623.899236    | 812.453256        | 15 |
| 3 | <b>268.165568</b> | 134.586422      |                |                  | V    | <b>1544.857037</b> | 772.932156        | 1527.830488 | 764.418882        | 1526.846472    | 763.926874        | 14 |
| 4 | <b>381.249632</b> | 191.128454      |                |                  | I    | <b>1445.788623</b> | <b>723.397949</b> | 1428.762074 | <b>714.884675</b> | 1427.778058    | <b>714.392667</b> | 13 |
| 5 | <b>494.333696</b> | 247.670486      |                |                  | L    | <b>1332.704559</b> | 666.855917        | 1315.678010 | 658.342643        | 1314.693994    | 657.850635        | 12 |
| 6 | <b>551.355160</b> | 276.181218      |                |                  | G    | <b>1219.620495</b> | 610.313885        | 1202.593946 | 601.800611        | 1201.609930    | 601.308603        | 11 |

|    |                    |            |                    |                   |   |                    |                   |             |            |             |            |           |
|----|--------------------|------------|--------------------|-------------------|---|--------------------|-------------------|-------------|------------|-------------|------------|-----------|
| 7  | <b>638.387188</b>  | 319.697232 | <b>620.376623</b>  | <b>310.691950</b> | S | <b>1162.599031</b> | 581.803153        | 1145.572482 | 573.289879 | 1144.588466 | 572.797871 | <b>10</b> |
| 8  | 735.439952         | 368.223614 | 717.429387         | 359.218332        | P | <b>1075.567003</b> | 538.287139        | 1058.540454 | 529.773865 | 1057.556438 | 529.281857 | <b>9</b>  |
| 9  | 850.466895         | 425.737086 | 832.456330         | 416.731803        | D | <b>978.514239</b>  | 489.760757        | 961.487690  | 481.247483 | 960.503674  | 480.755475 | <b>8</b>  |
| 10 | <b>965.493838</b>  | 483.250557 | 947.483273         | 474.245274        | D | <b>863.487296</b>  | 432.247286        | 846.460747  | 423.734011 | 845.476731  | 423.242003 | <b>7</b>  |
| 11 | <b>1064.562252</b> | 532.784764 | 1046.551687        | 523.779481        | V | 748.460353         | 374.733814        | 731.433804  | 366.220540 | 730.449788  | 365.728532 | <b>6</b>  |
| 12 | 1177.646316        | 589.326796 | 1159.635751        | 580.321513        | L | 649.391939         | 325.199607        | 632.365390  | 316.686333 | 631.381374  | 316.194325 | <b>5</b>  |
| 13 | <b>1306.688909</b> | 653.848092 | 1288.678344        | 644.842810        | E | <b>536.307875</b>  | <b>268.657576</b> | 519.281326  | 260.144301 | 518.297310  | 259.652293 | <b>4</b>  |
| 14 | <b>1453.757323</b> | 727.382299 | <b>1435.746758</b> | 718.377017        | F | <b>407.265282</b>  | 204.136279        | 390.238733  | 195.623004 |             |            | <b>3</b>  |
| 15 | <b>1566.841387</b> | 783.924331 | 1548.830822        | 774.919049        | L | 260.196868         | 130.602072        | 243.170319  | 122.088797 |             |            | <b>2</b>  |
| 16 |                    |            |                    |                   | K | 147.112804         | 74.060040         | 130.086255  | 65.546765  |             |            | <b>1</b>  |

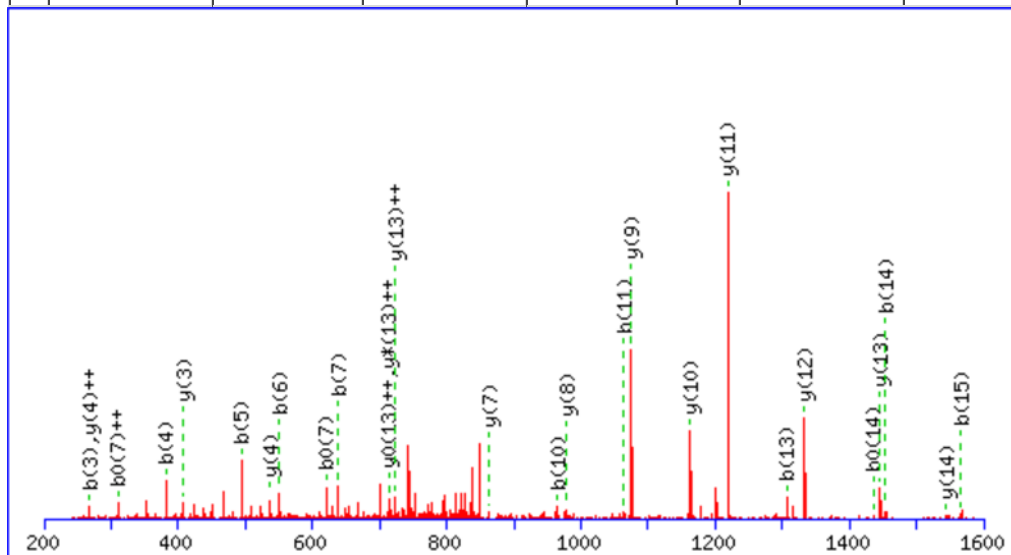

## Peptide View

MS/MS Fragmentation of **SCSSCVATDPDSIGAAHLIFCCFR**

Found in **IP100022620**, Tax\_Id=9606 Gene\_Symbol=SLURP1 Secreted Ly-6/uPAR-related protein 1

**Experiment:** 55 - PyD-1 **Fraction:** PyD-1

Match to Query 18111: 2817.203448 from(1409.609000,2+)

Title: OECHL100310\_29.19251.19251.2.dta

Data file \\BOROMIR\Masse\Data LTQ-Orbitrap\Chrystelle Lacroix\Etude clinique sJPU\OECHL100310\_29.raw

**Monoisotopic mass of neutral peptide Mr(calc):** 2817.197922**Fixed modifications:** Carbamidomethyl (C) (apply to specified residues or termini only)**Ions Score:** 54**Expect:** 0.00029**Matches :** 25/216 fragment ions using 48 most intense peaks ([help](#))

| #  | b           | b <sup>++</sup> | b <sup>0</sup> | b <sup>0++</sup> | Seq. | y           | y <sup>++</sup> | y*          | y* <sup>++</sup> | y <sup>0</sup> | y <sup>0++</sup> | #  |
|----|-------------|-----------------|----------------|------------------|------|-------------|-----------------|-------------|------------------|----------------|------------------|----|
| 1  | 88.039304   | 44.523290       | 70.028739      | 35.518008        | S    |             |                 |             |                  |                |                  | 25 |
| 2  | 248.069953  | 124.538614      | 230.059388     | 115.533332       | C    | 2731.173141 | 1366.090208     | 2714.146592 | 1357.576934      | 2713.162576    | 1357.084926      | 24 |
| 3  | 335.101981  | 168.054628      | 317.091416     | 159.049346       | S    | 2571.142492 | 1286.074884     | 2554.115943 | 1277.561609      | 2553.131927    | 1277.069601      | 23 |
| 4  | 422.134009  | 211.570642      | 404.123444     | 202.565360       | S    | 2484.110464 | 1242.558870     | 2467.083915 | 1234.045595      | 2466.099899    | 1233.553587      | 22 |
| 5  | 509.166037  | 255.086656      | 491.155472     | 246.081374       | S    | 2397.078436 | 1199.042856     | 2380.051887 | 1190.529581      | 2379.067871    | 1190.037573      | 21 |
| 6  | 669.196686  | 335.101981      | 651.186121     | 326.096699       | C    | 2310.046408 | 1155.526842     | 2293.019859 | 1147.013567      | 2292.035843    | 1146.521559      | 20 |
| 7  | 768.265100  | 384.636188      | 750.254535     | 375.630905       | V    | 2150.015759 | 1075.511517     | 2132.989210 | 1066.998243      | 2132.005194    | 1066.506235      | 19 |
| 8  | 839.302214  | 420.154745      | 821.291649     | 411.149462       | A    | 2050.947345 | 1025.977310     | 2033.920796 | 1017.464036      | 2032.936780    | 1016.972028      | 18 |
| 9  | 940.349893  | 470.678585      | 922.339328     | 461.673302       | T    | 1979.910231 | 990.458753      | 1962.883682 | 981.945479       | 1961.899666    | 981.453471       | 17 |
| 10 | 1055.376836 | 528.192056      | 1037.366271    | 519.186773       | D    | 1878.862552 | 939.934914      | 1861.836003 | 931.421639       | 1860.851987    | 930.929631       | 16 |
| 11 | 1152.429600 | 576.718438      | 1134.419035    | 567.713155       | P    | 1763.835609 | 882.421442      | 1746.809060 | 873.908168       | 1745.825044    | 873.416160       | 15 |
| 12 | 1267.456543 | 634.231910      | 1249.445978    | 625.226627       | D    | 1666.782845 | 833.895060      | 1649.756296 | 825.381786       | 1648.772280    | 824.889778       | 14 |
| 13 | 1354.488571 | 677.747924      | 1336.478006    | 668.742641       | S    | 1551.755902 | 776.381589      | 1534.729353 | 767.868314       | 1533.745337    | 767.376306       | 13 |
| 14 | 1467.572635 | 734.289956      | 1449.562070    | 725.284673       | I    | 1464.723874 | 732.865575      | 1447.697325 | 724.352300       |                |                  | 12 |
| 15 | 1524.594099 | 762.800687      | 1506.583534    | 753.795405       | G    | 1351.639810 | 676.323543      | 1334.613261 | 667.810268       |                |                  | 11 |
| 16 | 1595.631213 | 798.319244      | 1577.620648    | 789.313962       | A    | 1294.618346 | 647.812811      | 1277.591797 | 639.299536       |                |                  | 10 |
| 17 | 1666.668327 | 833.837801      | 1648.657762    | 824.832519       | A    | 1223.581232 | 612.294254      | 1206.554683 | 603.780979       |                |                  | 9  |
| 18 | 1803.727239 | 902.367257      | 1785.716674    | 893.361975       | H    | 1152.544118 | 576.775697      | 1135.517569 | 568.262422       |                |                  | 8  |
| 19 | 1916.811303 | 958.909289      | 1898.800738    | 949.904007       | L    | 1015.485206 | 508.246241      | 998.458657  | 499.732966       |                |                  | 7  |
| 20 | 2029.895367 | 1015.451321     | 2011.884802    | 1006.446039      | I    | 902.401142  | 451.704209      | 885.374593  | 443.190934       |                |                  | 6  |
| 21 | 2176.963781 | 1088.985528     | 2158.953216    | 1079.980246      | F    | 789.317078  | 395.162177      | 772.290529  | 386.648902       |                |                  | 5  |
| 22 | 2336.994430 | 1169.000853     | 2318.983865    | 1159.995570      | C    | 642.248664  | 321.627970      | 625.222115  | 313.114695       |                |                  | 4  |
| 23 | 2497.025079 | 1249.016177     | 2479.014514    | 1240.010895      | C    | 482.218015  | 241.612645      | 465.191466  | 233.099371       |                |                  | 3  |
| 24 | 2644.093493 | 1322.550384     | 2626.082928    | 1313.545102      | F    | 322.187366  | 161.597321      | 305.160817  | 153.084046       |                |                  | 2  |
| 25 |             |                 |                |                  | R    | 175.118952  | 88.063114       | 158.092403  | 79.549839        |                |                  | 1  |

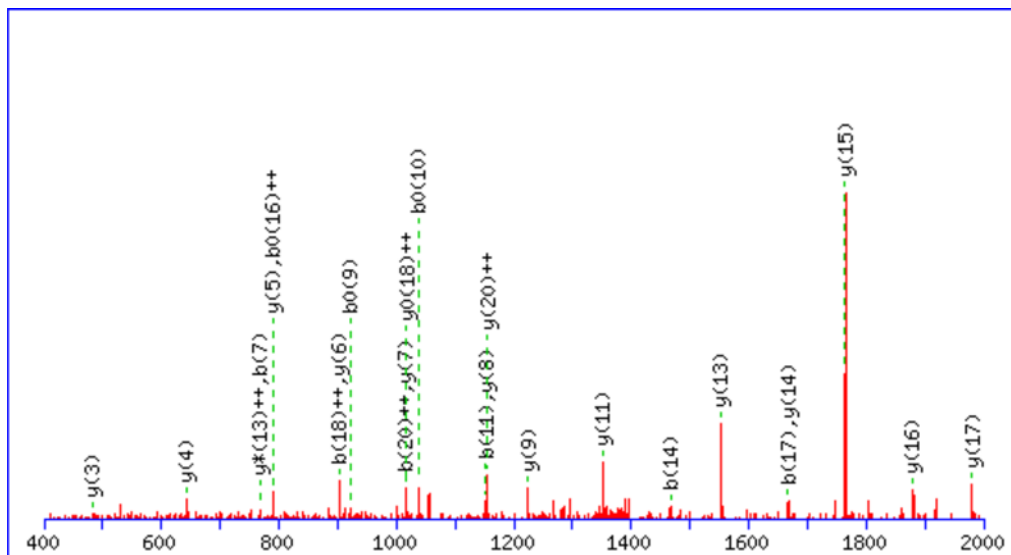

## Peptide View

MS/MS Fragmentation of **YSGSEGSTQTLTKGELK**

Found in **IPI00017526**, Tax\_Id=9606 Gene\_Symbol=S100P Protein S100-P

**Experiment:** 55 - PyD-1 **Fraction:** PyD-1

Match to Query 12616: 1784.880048 from(893.447300,2+)

Title: OECHL100310\_29.7619.7619.2.dta

Data file \\BOROMIR\Masse\Data LTQ-Orbitrap\Chrystelle Lacroix\Etude clinique sJPU\OECHL100310\_29.raw

**Monoisotopic mass of neutral peptide Mr(calc):** 1784.879211 **Fixed modifications:** Carbamidomethyl (C) (apply to specified residues or termini only) **Ions Score:** 80

**Expect:** 1.7e-006 **Matches :** 38/170 fragment ions using 60 most intense peaks ([help](#))

| # | b                 | b <sup>++</sup> | b* | b <sup>*++</sup> | b <sup>0</sup>    | b <sup>0++</sup> | Seq. | y                  | y <sup>++</sup>   | y*                 | y <sup>*++</sup>  | y <sup>0</sup> | y <sup>0++</sup>  | #  |
|---|-------------------|-----------------|----|------------------|-------------------|------------------|------|--------------------|-------------------|--------------------|-------------------|----------------|-------------------|----|
| 1 | 164.070605        | 82.538940       |    |                  |                   |                  | Y    |                    |                   |                    |                   |                |                   | 17 |
| 2 | 251.102633        | 126.054954      |    |                  | 233.092068        | 117.049672       | S    | <b>1622.823172</b> | <b>811.915224</b> | 1605.796623        | 803.401950        | 1604.812607    | 802.909941        | 16 |
| 3 | 308.124097        | 154.565687      |    |                  | <b>290.113532</b> | 145.560404       | G    | <b>1535.791144</b> | <b>768.399210</b> | 1518.764595        | 759.885936        | 1517.780579    | 759.393928        | 15 |
| 4 | 395.156125        | 198.081701      |    |                  | 377.145560        | 189.076418       | S    | 1478.769680        | <b>739.888478</b> | 1461.743131        | 731.375204        | 1460.759115    | 730.883195        | 14 |
| 5 | <b>524.198718</b> | 262.602997      |    |                  | <b>506.188153</b> | 253.597715       | E    | <b>1391.737652</b> | <b>696.372464</b> | <b>1374.711103</b> | 687.859190        | 1373.727087    | 687.367182        | 13 |
| 6 | 581.220182        | 291.113729      |    |                  | 563.209617        | 282.108447       | G    | <b>1262.695059</b> | <b>631.851167</b> | <b>1245.668510</b> | <b>623.337893</b> | 1244.684494    | <b>622.845885</b> | 12 |

|    |                    |            |                    |                   |                    |                   |   |                    |                   |                    |            |                   |                   |           |
|----|--------------------|------------|--------------------|-------------------|--------------------|-------------------|---|--------------------|-------------------|--------------------|------------|-------------------|-------------------|-----------|
| 7  | 668.252210         | 334.629743 |                    |                   | 650.241645         | 325.624461        | S | <b>1205.673595</b> | 603.340436        | 1188.647046        | 594.827161 | 1187.663030       | 594.335153        | <b>11</b> |
| 8  | 769.299889         | 385.153583 |                    |                   | 751.289324         | 376.148300        | T | <b>1118.641567</b> | 559.824421        | 1101.615018        | 551.311147 | 1100.631002       | 550.819139        | <b>10</b> |
| 9  | 897.358467         | 449.182872 | 880.331918         | 440.669597        | 879.347902         | 440.177589        | Q | <b>1017.593888</b> | 509.300582        | <b>1000.567339</b> | 500.787307 | 999.583323        | 500.295299        | <b>9</b>  |
| 10 | 998.406146         | 499.706711 | 981.379597         | 491.193437        | 980.395581         | 490.701429        | T | 889.535310         | 445.271293        | 872.508761         | 436.758018 | 871.524745        | <b>436.266010</b> | <b>8</b>  |
| 11 | 1111.490210        | 556.248743 | 1094.463661        | 547.735469        | 1093.479645        | 547.243461        | L | <b>788.487631</b>  | 394.747453        | 771.461082         | 386.234179 | 770.477066        | 385.742171        | <b>7</b>  |
| 12 | 1212.537889        | 606.772583 | 1195.511340        | 598.259308        | <b>1194.527324</b> | 597.767300        | T | <b>675.403567</b>  | <b>338.205421</b> | 658.377018         | 329.692147 | 657.393002        | 329.200139        | <b>6</b>  |
| 13 | <b>1340.632852</b> | 670.820064 | 1323.606303        | 662.306790        | 1322.622287        | 661.814782        | K | <b>574.355888</b>  | 287.681582        | 557.329339         | 279.168307 | 556.345323        | 278.676299        | <b>5</b>  |
| 14 | <b>1397.654316</b> | 699.330796 | 1380.627767        | 690.817522        | 1379.643751        | 690.325514        | G | <b>446.260925</b>  | 223.634100        | 429.234376         | 215.120826 | <b>428.250360</b> | 214.628818        | <b>4</b>  |
| 15 | <b>1526.696909</b> | 763.852093 | <b>1509.670360</b> | 755.338818        | 1508.686344        | 754.846810        | E | 389.239461         | 195.123368        | 372.212912         | 186.610094 | 371.228896        | 186.118086        | <b>3</b>  |
| 16 | <b>1639.780973</b> | 820.394124 | <b>1622.754424</b> | <b>811.880850</b> | <b>1621.770408</b> | <b>811.388842</b> | L | <b>260.196868</b>  | 130.602072        | 243.170319         | 122.088797 |                   |                   | <b>2</b>  |
| 17 |                    |            |                    |                   |                    |                   | K | 147.112804         | 74.060040         | 130.086255         | 65.546765  |                   |                   | <b>1</b>  |

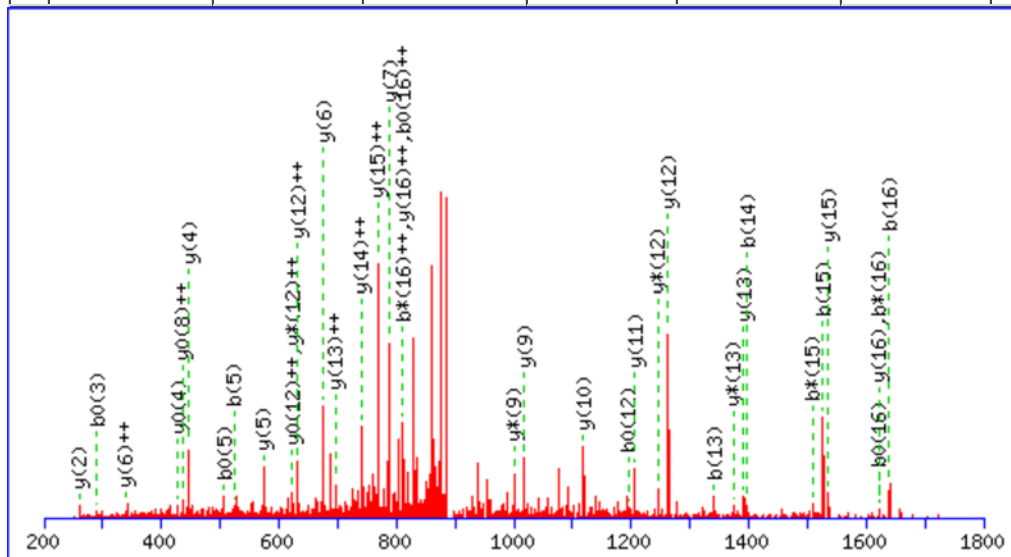

## Peptide View

MS/MS Fragmentation of **FVYHLSDLCK**

Found in **IP100178926**, Tax\_Id=9606 Gene\_Symbol=IGJ Immunoglobulin J chain

Experiment: 55 - PyD-1 Fraction: PyD-1

Match to Query 7106: 1280.622248 from(641.318400,2+)

Title: OECHL100310\_29.13863.13863.2.dta

Data file \\BOROMIR\Masse\Data LTQ-Orbitrap\Chrystelle Lacroix\Etude clinique sJPU\OECHL100310\_29.raw

**Monoisotopic mass of neutral peptide Mr(calc):** 1280.622345**Fixed modifications:** Carbamidomethyl (C) (apply to specified residues or termini only)**Ions Score:** 49**Expect:** 0.0011**Matches :** 10/74 fragment ions using 11 most intense peaks ([help](#))

| #  | b           | b <sup>++</sup> | b <sup>0</sup> | b <sup>0++</sup> | Seq. | y           | y <sup>++</sup> | y*          | y <sup>++</sup> * | y <sup>0</sup> | y <sup>0++</sup> | #  |
|----|-------------|-----------------|----------------|------------------|------|-------------|-----------------|-------------|-------------------|----------------|------------------|----|
| 1  | 148.075690  | 74.541483       |                |                  | F    |             |                 |             |                   |                |                  | 10 |
| 2  | 247.144104  | 124.075690      |                |                  | V    | 1134.561207 | 567.784242      | 1117.534658 | 559.270967        | 1116.550642    | 558.778959       | 9  |
| 3  | 410.207433  | 205.607354      |                |                  | Y    | 1035.492793 | 518.250035      | 1018.466244 | 509.736760        | 1017.482228    | 509.244752       | 8  |
| 4  | 547.266345  | 274.136811      |                |                  | H    | 872.429464  | 436.718370      | 855.402915  | 428.205096        | 854.418899     | 427.713088       | 7  |
| 5  | 660.350409  | 330.678843      |                |                  | L    | 735.370552  | 368.188914      | 718.344003  | 359.675640        | 717.359987     | 359.183632       | 6  |
| 6  | 747.382437  | 374.194857      | 729.371872     | 365.189574       | S    | 622.286488  | 311.646882      | 605.259939  | 303.133608        | 604.275923     | 302.641600       | 5  |
| 7  | 862.409380  | 431.708328      | 844.398815     | 422.703045       | D    | 535.254460  | 268.130868      | 518.227911  | 259.617594        | 517.243895     | 259.125586       | 4  |
| 8  | 975.493444  | 488.250360      | 957.482879     | 479.245077       | L    | 420.227517  | 210.617397      | 403.200968  | 202.104122        |                |                  | 3  |
| 9  | 1135.524093 | 568.265685      | 1117.513528    | 559.260402       | C    | 307.143453  | 154.075365      | 290.116904  | 145.562090        |                |                  | 2  |
| 10 |             |                 |                |                  | K    | 147.112804  | 74.060040       | 130.086255  | 65.546765         |                |                  | 1  |

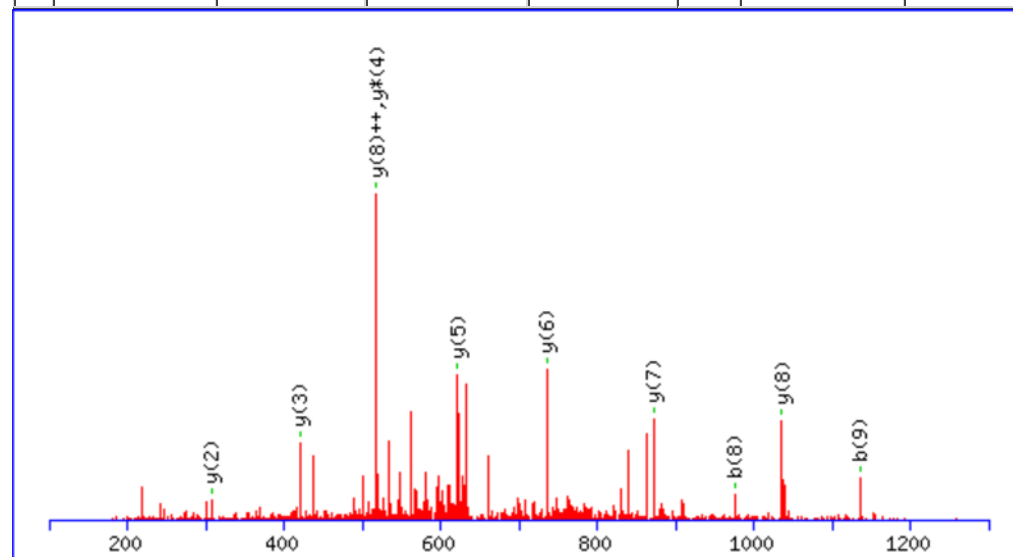

## Peptide View

MS/MS Fragmentation of **LFGGNFAHQASVAR**Found in **IPI00298237**, Tax\_Id=9606 Gene\_Symbol=TPP1 cDNA FLJ56402, highly similar to Tripeptidyl-peptidase 1**Experiment:** 55 - PyD-1 **Fraction:** PyD-1

Match to Query 9209: 1473.747848 from(737.881200,2+)

Title: OECHL100310\_29.11981.11981.2.dta

Data file \\BOROMIR\Masse\Data LTQ-Orbitrap\Chrystelle Lacroix\Etude clinique sJPU\OECHL100310\_29.raw

**Monoisotopic mass of neutral peptide Mr(calc):** 1473.747696**Fixed modifications:** Carbamidomethyl (C) (apply to specified residues or termini only)**Ions Score:** 73**Expect:** 7.1e-006**Matches :** 26/122 fragment ions using 52 most intense peaks ([help](#))

| #  | b                  | b <sup>++</sup> | b <sup>*</sup>    | b <sup>*++</sup>  | b <sup>0</sup> | b <sup>0++</sup> | Seq. | y                  | y <sup>++</sup>   | y <sup>*</sup> | y <sup>*++</sup>  | y <sup>0</sup> | y <sup>0++</sup> | #  |
|----|--------------------|-----------------|-------------------|-------------------|----------------|------------------|------|--------------------|-------------------|----------------|-------------------|----------------|------------------|----|
| 1  | 114.091340         | 57.549308       |                   |                   |                |                  | L    |                    |                   |                |                   |                |                  | 14 |
| 2  | <b>261.159754</b>  | 131.083515      |                   |                   |                |                  | F    | 1361.670909        | <b>681.339093</b> | 1344.644360    | 672.825818        | 1343.660344    | 672.333810       | 13 |
| 3  | 318.181218         | 159.594247      |                   |                   |                |                  | G    | <b>1214.602495</b> | <b>607.804886</b> | 1197.575946    | <b>599.291611</b> | 1196.591930    | 598.799603       | 12 |
| 4  | 375.202682         | 188.104979      |                   |                   |                |                  | G    | <b>1157.581031</b> | <b>579.294154</b> | 1140.554482    | 570.780879        | 1139.570466    | 570.288871       | 11 |
| 5  | 489.245609         | 245.126442      | <b>472.219060</b> | 236.613168        |                |                  | N    | <b>1100.559567</b> | <b>550.783422</b> | 1083.533018    | 542.270147        | 1082.549002    | 541.778139       | 10 |
| 6  | 636.314023         | 318.660650      | 619.287474        | 310.147375        |                |                  | F    | <b>986.516640</b>  | 493.761958        | 969.490091     | 485.248684        | 968.506075     | 484.756676       | 9  |
| 7  | 707.351137         | 354.179207      | 690.324588        | <b>345.665932</b> |                |                  | A    | <b>839.448226</b>  | 420.227751        | 822.421677     | 411.714477        | 821.437661     | 411.222469       | 8  |
| 8  | <b>844.410049</b>  | 422.708663      | 827.383500        | 414.195388        |                |                  | H    | <b>768.411112</b>  | <b>384.709194</b> | 751.384563     | <b>376.195920</b> | 750.400547     | 375.703912       | 7  |
| 9  | <b>972.468627</b>  | 486.737952      | 955.442078        | 478.224677        |                |                  | Q    | <b>631.352200</b>  | 316.179738        | 614.325651     | 307.666464        | 613.341635     | 307.174456       | 6  |
| 10 | <b>1043.505741</b> | 522.256509      | 1026.479192       | 513.743234        |                |                  | A    | <b>503.293622</b>  | 252.150449        | 486.267073     | 243.637175        | 485.283057     | 243.145167       | 5  |
| 11 | <b>1130.537769</b> | 565.772523      | 1113.511220       | 557.259248        | 1112.527204    | 556.767240       | S    | <b>432.256508</b>  | 216.631892        | 415.229959     | 208.118618        | 414.245943     | 207.626610       | 4  |
| 12 | 1229.606183        | 615.306730      | 1212.579634       | 606.793455        | 1211.595618    | 606.301447       | V    | <b>345.224480</b>  | 173.115878        | 328.197931     | 164.602603        |                |                  | 3  |
| 13 | <b>1300.643297</b> | 650.825287      | 1283.616748       | 642.312012        | 1282.632732    | 641.820004       | A    | <b>246.156066</b>  | 123.581671        | 229.129517     | 115.068396        |                |                  | 2  |
| 14 |                    |                 |                   |                   |                |                  | R    | 175.118952         | 88.063114         | 158.092403     | 79.549839         |                |                  | 1  |



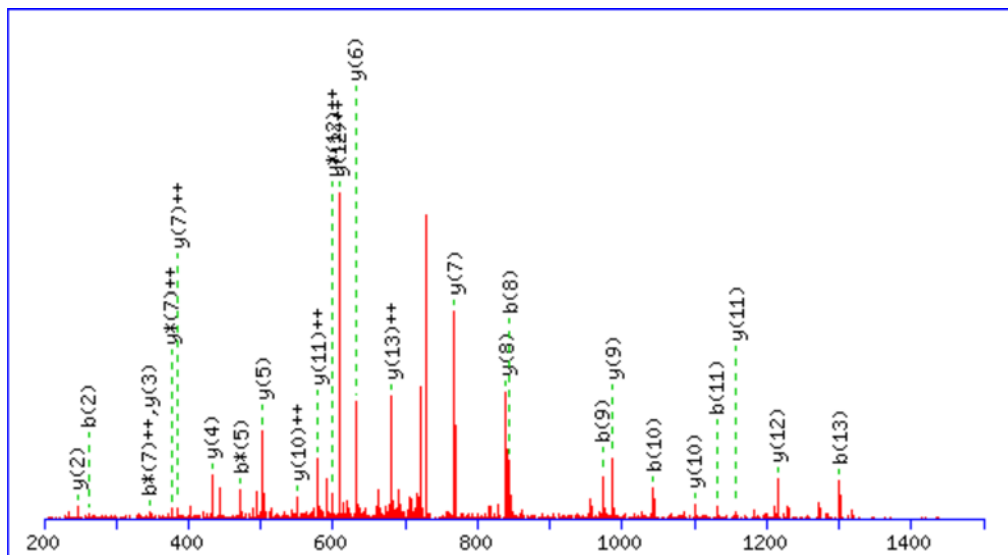

## Peptide View

MS/MS Fragmentation of **SYELTQPPSVSVSPGQ TAR**

Found in **IPI00382440**, Tax\_Id=9606 Gene\_Symbol=- Ig lambda chain V-IV region Hil

**Experiment:** 55 - PyD-1 **Fraction:** PyD-1

Match to Query 14283: 2002.995448 from(1002.505000,2+)

Title: OECHL100310\_29.13257.13257.2.dta

Data file \\BOROMIR\Masse\Data LTQ-Orbitrap\Chrystelle Lacroix\Etude clinique sJPU\OECHL100310\_29.raw

**Monoisotopic mass of neutral peptide Mr(calc):** 2002.995987 **Fixed modifications:** Carbamidomethyl (C) (apply to specified residues or termini only) **Ions Score:** 70

**Expect:** 1.8e-005 **Matches :** 27/202 fragment ions using 32 most intense peaks ([help](#))

| # | b                 | b <sup>++</sup> | b <sup>*</sup> | b <sup>*++</sup> | b <sup>0</sup>    | b <sup>0++</sup> | Seq. | y                  | y <sup>++</sup>   | y <sup>*</sup> | y <sup>*++</sup> | y <sup>0</sup> | y <sup>0++</sup> | #  |
|---|-------------------|-----------------|----------------|------------------|-------------------|------------------|------|--------------------|-------------------|----------------|------------------|----------------|------------------|----|
| 1 | 88.039304         | 44.523290       |                |                  | 70.028739         | 35.518008        | S    |                    |                   |                |                  |                |                  | 19 |
| 2 | 251.102633        | 126.054954      |                |                  | 233.092068        | 117.049672       | Y    | 1916.971234        | 958.989255        | 1899.944685    | 950.475981       | 1898.960669    | 949.983973       | 18 |
| 3 | <b>380.145226</b> | 190.576251      |                |                  | 362.134661        | 181.570969       | E    | 1753.907905        | 877.457591        | 1736.881356    | 868.944316       | 1735.897340    | 868.452308       | 17 |
| 4 | <b>493.229290</b> | 247.118283      |                |                  | <b>475.218725</b> | 238.113001       | L    | 1624.865312        | <b>812.936294</b> | 1607.838763    | 804.423020       | 1606.854747    | 803.931012       | 16 |
| 5 | 594.276969        | 297.642123      |                |                  | <b>576.266404</b> | 288.636840       | T    | <b>1511.781248</b> | 756.394262        | 1494.754699    | 747.880988       | 1493.770683    | 747.388980       | 15 |
| 6 | 722.335547        | 361.671412      | 705.308998     | 353.158137       | <b>704.324982</b> | 352.666129       | Q    | <b>1410.733569</b> | 705.870423        | 1393.707020    | 697.357148       | 1392.723004    | 696.865140       | 14 |

|    |                    |            |                    |                   |                    |                   |   |                    |                   |             |            |             |            |           |
|----|--------------------|------------|--------------------|-------------------|--------------------|-------------------|---|--------------------|-------------------|-------------|------------|-------------|------------|-----------|
| 7  | 819.388311         | 410.197794 | 802.361762         | 401.684519        | 801.377746         | 401.192511        | P | <b>1282.674991</b> | <b>641.841134</b> | 1265.648442 | 633.327859 | 1264.664426 | 632.835851 | <b>13</b> |
| 8  | 916.441075         | 458.724176 | 899.414526         | 450.210901        | 898.430510         | 449.718893        | P | <b>1185.622227</b> | 593.314752        | 1168.595678 | 584.801477 | 1167.611662 | 584.309469 | <b>12</b> |
| 9  | 1003.473103        | 502.240190 | 986.446554         | <b>493.726915</b> | 985.462538         | <b>493.234907</b> | S | 1088.569463        | 544.788370        | 1071.542914 | 536.275095 | 1070.558898 | 535.783087 | <b>11</b> |
| 10 | <b>1102.541517</b> | 551.774397 | <b>1085.514968</b> | 543.261122        | <b>1084.530952</b> | 542.769114        | V | 1001.537435        | 501.272356        | 984.510886  | 492.759081 | 983.526870  | 492.267073 | <b>10</b> |
| 11 | 1189.573545        | 595.290411 | 1172.546996        | 586.777136        | 1171.562980        | 586.285128        | S | <b>902.469021</b>  | 451.738149        | 885.442472  | 443.224874 | 884.458456  | 442.732866 | <b>9</b>  |
| 12 | <b>1288.641959</b> | 644.824618 | 1271.615410        | 636.311343        | 1270.631394        | 635.819335        | V | <b>815.436993</b>  | 408.222135        | 798.410444  | 399.708860 | 797.426428  | 399.216852 | <b>8</b>  |
| 13 | <b>1375.673987</b> | 688.340632 | 1358.647438        | 679.827357        | 1357.663422        | 679.335349        | S | <b>716.368579</b>  | 358.687928        | 699.342030  | 350.174653 | 698.358014  | 349.682645 | <b>7</b>  |
| 14 | 1472.726751        | 736.867014 | 1455.700202        | 728.353739        | 1454.716186        | 727.861731        | P | <b>629.336551</b>  | 315.171914        | 612.310002  | 306.658639 | 611.325986  | 306.166631 | <b>6</b>  |
| 15 | 1529.748215        | 765.377746 | 1512.721666        | 756.864471        | <b>1511.737650</b> | 756.372463        | G | 532.283787         | 266.645532        | 515.257238  | 258.132257 | 514.273222  | 257.640249 | <b>5</b>  |
| 16 | <b>1657.806793</b> | 829.407035 | 1640.780244        | 820.893760        | 1639.796228        | 820.401752        | Q | <b>475.262323</b>  | 238.134800        | 458.235774  | 229.621525 | 457.251758  | 229.129517 | <b>4</b>  |
| 17 | 1758.854472        | 879.930874 | 1741.827923        | 871.417600        | 1740.843907        | 870.925592        | T | 347.203745         | 174.105510        | 330.177196  | 165.592236 | 329.193180  | 165.100228 | <b>3</b>  |
| 18 | <b>1829.891586</b> | 915.449431 | <b>1812.865037</b> | 906.936157        | 1811.881021        | 906.444149        | A | 246.156066         | 123.581671        | 229.129517  | 115.068396 |             |            | <b>2</b>  |
| 19 |                    |            |                    |                   |                    |                   | R | 175.118952         | 88.063114         | 158.092403  | 79.549839  |             |            | <b>1</b>  |

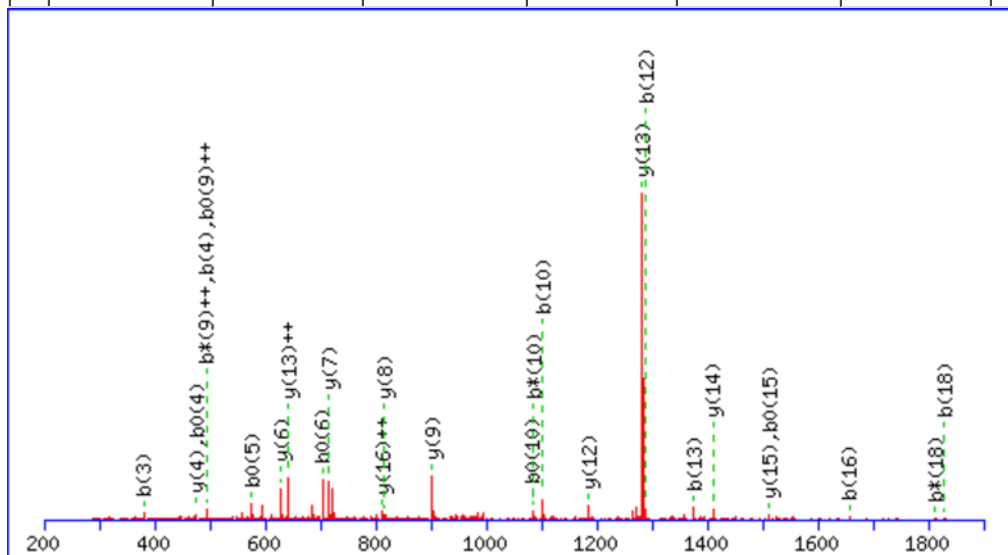

## Peptide View

MS/MS Fragmentation of **AIYKGPGEAGP**

Found in **IPI00011284**, Tax\_Id=9606 Gene\_Symbol=COMT Isoform Membrane-bound of Catechol O-methyltransferase

**Experiment:** 55 - PyD-1 **Fraction:** PyD-1

Match to Query 4931: 1145.571848 from(573.793200,2+)

Title: OECHL100310\_29.8086.8086.2.dta

Data file \\BOROMIR\Masse\Data LTQ-Orbitrap\Chrystelle Lacroix\Etude clinique sJPU\OECHL100310\_29.raw

**Monoisotopic mass of neutral peptide Mr(calc):** 1145.571671 **Fixed modifications:** Carbamidomethyl (C) (apply to specified residues or termini only) **Ions Score:** 59

**Expect:** 0.00016 **Matches :** 19/90 fragment ions using 38 most intense peaks ([help](#))

| #  | b                  | b <sup>++</sup>   | b <sup>*</sup>    | b <sup>*++</sup> | b <sup>0</sup> | b <sup>0++</sup> | Seq. | y                 | y <sup>++</sup>   | y <sup>*</sup> | y <sup>*++</sup> | y <sup>0</sup> | y <sup>0++</sup> | #  |
|----|--------------------|-------------------|-------------------|------------------|----------------|------------------|------|-------------------|-------------------|----------------|------------------|----------------|------------------|----|
| 1  | 72.044390          | 36.525833         |                   |                  |                |                  | A    |                   |                   |                |                  |                |                  | 12 |
| 2  | <b>185.128454</b>  | 93.067865         |                   |                  |                |                  | I    | 1075.541852       | 538.274564        | 1058.515303    | 529.761290       | 1057.531287    | 529.269282       | 11 |
| 3  | <b>348.191783</b>  | 174.599529        |                   |                  |                |                  | Y    | <b>962.457788</b> | <b>481.732532</b> | 945.431239     | 473.219258       | 944.447223     | 472.727250       | 10 |
| 4  | 476.286746         | 238.647011        | 459.260197        | 230.133737       |                |                  | K    | <b>799.394459</b> | 400.200868        | 782.367910     | 391.687593       | 781.383894     | 391.195585       | 9  |
| 5  | 533.308210         | 267.157743        | <b>516.281661</b> | 258.644469       |                |                  | G    | <b>671.299496</b> | 336.153386        |                |                  | 653.288931     | 327.148104       | 8  |
| 6  | 630.360974         | 315.684125        | 613.334425        | 307.170851       |                |                  | P    | <b>614.278032</b> | 307.642654        |                |                  | 596.267467     | 298.637372       | 7  |
| 7  | <b>687.382438</b>  | 344.194857        | 670.355889        | 335.681583       |                |                  | G    | <b>517.225268</b> | 259.116272        |                |                  | 499.214703     | 250.110990       | 6  |
| 8  | <b>774.414466</b>  | 387.710871        | 757.387917        | 379.197597       | 756.403901     | 378.705589       | S    | <b>460.203804</b> | 230.605540        |                |                  | 442.193239     | 221.600257       | 5  |
| 9  | <b>903.457059</b>  | 452.232168        | 886.430510        | 443.718893       | 885.446494     | 443.226885       | E    | <b>373.171776</b> | 187.089526        |                |                  | 355.161211     | 178.084243       | 4  |
| 10 | <b>974.494173</b>  | 487.750725        | 957.467624        | 479.237450       | 956.483608     | 478.745442       | A    | <b>244.129183</b> | 122.568229        |                |                  |                |                  | 3  |
| 11 | <b>1031.515637</b> | <b>516.261457</b> | 1014.489088       | 507.748182       | 1013.505072    | 507.256174       | G    | <b>173.092069</b> | 87.049672         |                |                  |                |                  | 2  |
| 12 |                    |                   |                   |                  |                |                  | P    | 116.070605        | 58.538941         |                |                  |                |                  | 1  |

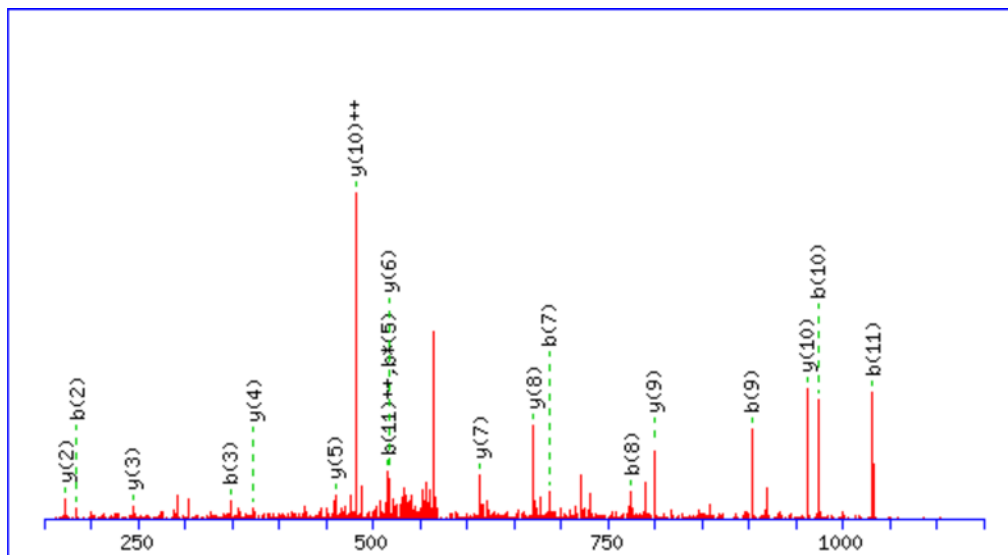

## Peptide View

MS/MS Fragmentation of **SDAAVDTSEITTKDLK**

Found in **IPI0045510**, Tax\_Id=9606 Gene\_Symbol=PTMA;PTMAP5 Isoform 2 of Prothymosin alpha

**Experiment:** 55 - PyD-1 **Fraction:** PyD-1

Match to Query 12879: 1821.886048 from(911.950300,2+)

Title: OECHL100310\_29.12093.12093.2.dta

Data file \\BOROMIR\Masse\Data LTQ-Orbitrap\Chrystelle Lacroix\Etude clinique sJPU\OECHL100310\_29.raw

**Monoisotopic mass of neutral peptide Mr(calc):** 1821.884354 **Fixed modifications:** Carbamidomethyl (C) (apply to specified residues or termini only) **Variable modifications:** N-term : Acetyl (N-term) **Ions Score:** 69 **Expect:** 1.9e-005 **Matches :** 42/162 fragment ions using 75 most intense peaks ([help](#))

| # | b                 | b <sup>++</sup> | b* | b <sup>*++</sup> | b <sup>0</sup> | b <sup>0++</sup> | Seq. | y                  | y <sup>++</sup> | y*          | y <sup>*++</sup> | y <sup>0</sup>     | y <sup>0++</sup> | #  |
|---|-------------------|-----------------|----|------------------|----------------|------------------|------|--------------------|-----------------|-------------|------------------|--------------------|------------------|----|
| 1 | 130.049869        | 65.528572       |    |                  | 112.039304     | 56.523290        | S    |                    |                 |             |                  |                    |                  | 17 |
| 2 | 245.076812        | 123.042044      |    |                  | 227.066247     | 114.036761       | D    | 1693.849052        | 847.428164      | 1676.822503 | 838.914890       | 1675.838487        | 838.422882       | 16 |
| 3 | <b>316.113926</b> | 158.560601      |    |                  | 298.103361     | 149.555319       | A    | 1578.822109        | 789.914693      | 1561.795560 | 781.401418       | 1560.811544        | 780.909410       | 15 |
| 4 | <b>387.151040</b> | 194.079158      |    |                  | 369.140475     | 185.073875       | A    | <b>1507.784995</b> | 754.396136      | 1490.758446 | 745.882861       | 1489.774430        | 745.390853       | 14 |
| 5 | <b>486.219454</b> | 243.613365      |    |                  | 468.208889     | 234.608082       | V    | <b>1436.747881</b> | 718.877579      | 1419.721332 | 710.364304       | <b>1418.737316</b> | 709.872296       | 13 |
| 6 | 601.246397        | 301.126837      |    |                  | 583.235832     | 292.121554       | D    | <b>1337.679467</b> | 669.343372      | 1320.652918 | 660.830097       | <b>1319.668902</b> | 660.338089       | 12 |

|    |                    |                   |                    |            |                    |            |          |                    |                   |                   |            |                    |            |           |
|----|--------------------|-------------------|--------------------|------------|--------------------|------------|----------|--------------------|-------------------|-------------------|------------|--------------------|------------|-----------|
| 7  | <b>702.294076</b>  | 351.650676        |                    |            | 684.283511         | 342.645394 | <b>T</b> | <b>1222.652524</b> | <b>611.829900</b> | 1205.625975       | 603.316626 | <b>1204.641959</b> | 602.824618 | <b>11</b> |
| 8  | 789.326104         | 395.166690        |                    |            | <b>771.315539</b>  | 386.161408 | <b>S</b> | <b>1121.604845</b> | 561.306061        | 1104.578296       | 552.792786 | <b>1103.594280</b> | 552.300778 | <b>10</b> |
| 9  | 876.358132         | 438.682704        |                    |            | 858.347567         | 429.677421 | <b>S</b> | <b>1034.572817</b> | 517.790047        | 1017.546268       | 509.276772 | 1016.562252        | 508.784764 | <b>9</b>  |
| 10 | 1005.400725        | <b>503.204001</b> |                    |            | <b>987.390160</b>  | 494.198718 | <b>E</b> | 947.540789         | 474.274033        | 930.514240        | 465.760758 | 929.530224         | 465.268750 | <b>8</b>  |
| 11 | 1118.484789        | 559.746033        |                    |            | <b>1100.474224</b> | 550.740750 | <b>I</b> | <b>818.498196</b>  | 409.752736        | 801.471647        | 401.239462 | 800.487631         | 400.747454 | <b>7</b>  |
| 12 | 1219.532468        | 610.269872        |                    |            | <b>1201.521903</b> | 601.264590 | <b>T</b> | <b>705.414132</b>  | 353.210704        | 688.387583        | 344.697430 | 687.403567         | 344.205422 | <b>6</b>  |
| 13 | <b>1320.580147</b> | 660.793712        |                    |            | 1302.569582        | 651.788429 | <b>T</b> | <b>604.366453</b>  | 302.686865        | 587.339904        | 294.173590 | 586.355888         | 293.681582 | <b>5</b>  |
| 14 | 1448.675110        | 724.841193        | 1431.648561        | 716.327919 | 1430.664545        | 715.835911 | <b>K</b> | <b>503.318774</b>  | 252.163025        | <b>486.292225</b> | 243.649750 | 485.308209         | 243.157742 | <b>4</b>  |
| 15 | <b>1563.702053</b> | 782.354665        | <b>1546.675504</b> | 773.841390 | <b>1545.691488</b> | 773.349382 | <b>D</b> | <b>375.223811</b>  | 188.115543        | 358.197262        | 179.602269 | 357.213246         | 179.110261 | <b>3</b>  |
| 16 | <b>1676.786117</b> | 838.896697        | 1659.759568        | 830.383422 | <b>1658.775552</b> | 829.891414 | <b>L</b> | <b>260.196868</b>  | 130.602072        | 243.170319        | 122.088797 |                    |            | <b>2</b>  |
| 17 |                    |                   |                    |            |                    |            | <b>K</b> | 147.112804         | 74.060040         | 130.086255        | 65.546765  |                    |            | <b>1</b>  |

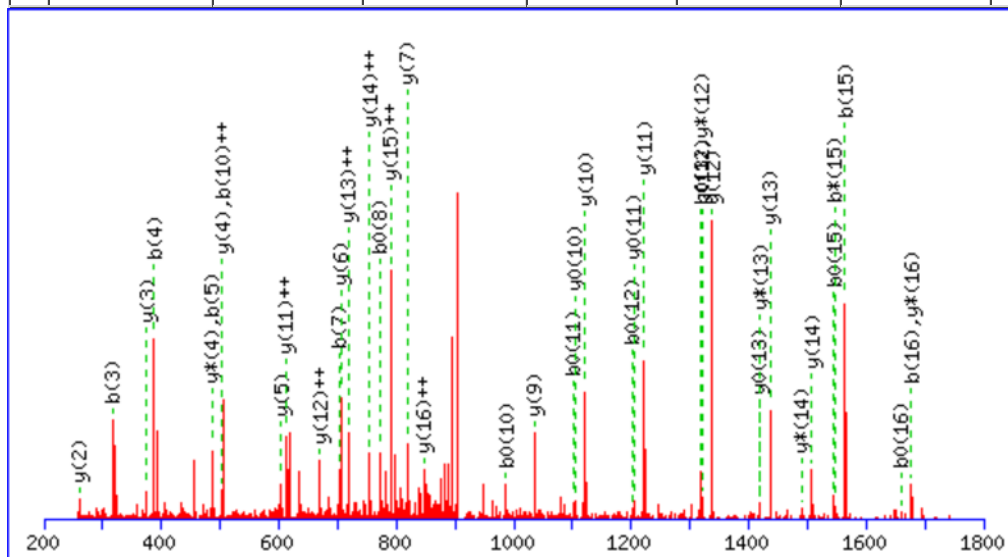

## Peptide View

MS/MS Fragmentation of **TGAVYVAEIGAK**

Found in **IP100552937**, Tax\_Id=9606 Gene\_Symbol=NHLRC3 NHL repeat-containing protein 3

Experiment: 55 - PyD-1 Fraction: PyD-1

Match to Query 5506: 1177.635448 from(589.825000,2+)

Title: OECHL100310\_29.11350.11350.2.dta

Data file \\BOROMIR\Masse\Data LTQ-Orbitrap\Chrystelle Lacroix\Etude clinique sJPU\OECHL100310\_29.raw

**Monoisotopic mass of neutral peptide Mr(calc):** 1177.634277**Fixed modifications:** Carbamidomethyl (C) (apply to specified residues or termini only)**Ions Score:** 58**Expect:** 9.9e-005**Matches :** 15/102 fragment ions using 21 most intense peaks ([help](#))

| #  | b           | b <sup>++</sup> | b <sup>0</sup> | b <sup>0++</sup> | Seq. | y           | y <sup>++</sup> | y*          | y <sup>*++</sup> | y <sup>0</sup> | y <sup>0++</sup> | #  |
|----|-------------|-----------------|----------------|------------------|------|-------------|-----------------|-------------|------------------|----------------|------------------|----|
| 1  | 102.054955  | 51.531116       | 84.044390      | 42.525833        | T    |             |                 |             |                  |                |                  | 12 |
| 2  | 159.076419  | 80.041847       | 141.065854     | 71.036565        | G    | 1077.593888 | 539.300582      | 1060.567339 | 530.787308       | 1059.583323    | 530.295300       | 11 |
| 3  | 230.113533  | 115.560404      | 212.102968     | 106.555122       | A    | 1020.572424 | 510.789850      | 1003.545875 | 502.276576       | 1002.561859    | 501.784568       | 10 |
| 4  | 329.181947  | 165.094611      | 311.171382     | 156.089329       | V    | 949.535310  | 475.271293      | 932.508761  | 466.758019       | 931.524745     | 466.266011       | 9  |
| 5  | 492.245276  | 246.626276      | 474.234711     | 237.620994       | Y    | 850.466896  | 425.737086      | 833.440347  | 417.223812       | 832.456331     | 416.731804       | 8  |
| 6  | 591.313690  | 296.160483      | 573.303125     | 287.155201       | V    | 687.403567  | 344.205422      | 670.377018  | 335.692147       | 669.393002     | 335.200139       | 7  |
| 7  | 662.350804  | 331.679040      | 644.340239     | 322.673758       | A    | 588.335153  | 294.671215      | 571.308604  | 286.157940       | 570.324588     | 285.665932       | 6  |
| 8  | 791.393397  | 396.200337      | 773.382832     | 387.195054       | E    | 517.298039  | 259.152658      | 500.271490  | 250.639383       | 499.287474     | 250.147375       | 5  |
| 9  | 904.477461  | 452.742369      | 886.466896     | 443.737086       | I    | 388.255446  | 194.631361      | 371.228897  | 186.118087       |                |                  | 4  |
| 10 | 961.498925  | 481.253101      | 943.488360     | 472.247818       | G    | 275.171382  | 138.089329      | 258.144833  | 129.576055       |                |                  | 3  |
| 11 | 1032.536039 | 516.771658      | 1014.525474    | 507.766375       | A    | 218.149918  | 109.578597      | 201.123369  | 101.065322       |                |                  | 2  |
| 12 |             |                 |                |                  | K    | 147.112804  | 74.060040       | 130.086255  | 65.546765        |                |                  | 1  |

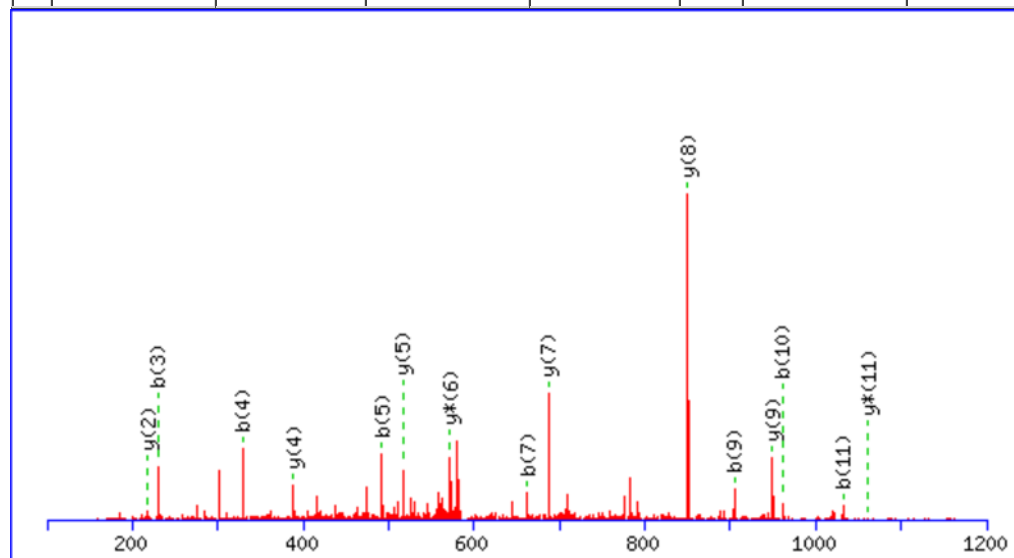

## Peptide View

MS/MS Fragmentation of **TFGQGTKLEIKR**

Found in **IPI00827643**, Tax\_Id=9606 Gene\_Symbol=- HRV Fab 027-VL (Fragment)

**Experiment:** 55 - PyD-1 **Fraction:** PyD-1

Match to Query 8199: 1376.778448 from(689.396500,2+)

Title: OECHL100310\_29.8043.8043.2.dta

Data file \\BOROMIR\Masse\Data LTQ-Orbitrap\Chrystelle Lacroix\Etude clinique sJPU\OECHL100310\_29.raw

**Monoisotopic mass of neutral peptide Mr(calc):** 1376.777588**Fixed modifications:** Carbamidomethyl (C) (apply to specified residues or termini only)**Ions Score:** 57

**Expect:** 7.3e-005**Matches :** 19/120 fragment ions using 24 most intense peaks ([help](#))

| #  | b                  | b <sup>++</sup> | b <sup>*</sup>    | b <sup>*++</sup>  | b <sup>0</sup>    | b <sup>0++</sup>  | Seq. | y                  | y <sup>++</sup>   | y <sup>*</sup> | y <sup>*++</sup> | y <sup>0</sup> | y <sup>0++</sup> | #  |
|----|--------------------|-----------------|-------------------|-------------------|-------------------|-------------------|------|--------------------|-------------------|----------------|------------------|----------------|------------------|----|
| 1  | 102.054955         | 51.531116       |                   |                   | 84.044390         | 42.525833         | T    |                    |                   |                |                  |                |                  | 12 |
| 2  | <b>249.123369</b>  | 125.065322      |                   |                   | 231.112804        | 116.060040        | F    | 1276.737198        | 638.872237        | 1259.710649    | 630.358963       | 1258.726633    | 629.866955       | 11 |
| 3  | 306.144833         | 153.576054      |                   |                   | 288.134268        | 144.570772        | G    | <b>1129.668784</b> | <b>565.338030</b> | 1112.642235    | 556.824756       | 1111.658219    | 556.332748       | 10 |
| 4  | 434.203411         | 217.605343      | 417.176862        | 209.092069        | <b>416.192846</b> | 208.600061        | Q    | 1072.647320        | 536.827298        | 1055.620771    | 528.314024       | 1054.636755    | 527.822016       | 9  |
| 5  | 491.224875         | 246.116075      | 474.198326        | 237.602801        | <b>473.214310</b> | 237.110793        | G    | <b>944.588742</b>  | <b>472.798009</b> | 927.562193     | 464.284735       | 926.578177     | 463.792727       | 8  |
| 6  | 592.272554         | 296.639915      | 575.246005        | 288.126641        | 574.261989        | 287.634633        | T    | <b>887.567278</b>  | 444.287277        | 870.540729     | 435.774003       | 869.556713     | 435.281995       | 7  |
| 7  | 720.367517         | 360.687397      | 703.340968        | 352.174122        | 702.356952        | 351.682114        | K    | <b>786.519599</b>  | 393.763438        | 769.493050     | 385.250163       | 768.509034     | 384.758155       | 6  |
| 8  | 833.451581         | 417.229429      | 816.425032        | 408.716154        | 815.441016        | 408.224146        | L    | <b>658.424636</b>  | 329.715956        | 641.398087     | 321.202682       | 640.414071     | 320.710674       | 5  |
| 9  | 962.494174         | 481.750725      | <b>945.467625</b> | <b>473.237451</b> | <b>944.483609</b> | <b>472.745443</b> | E    | <b>545.340572</b>  | 273.173924        | 528.314023     | 264.660650       | 527.330007     | 264.168642       | 4  |
| 10 | <b>1075.578238</b> | 538.292757      | 1058.551689       | 529.779483        | 1057.567673       | 529.287475        | I    | <b>416.297979</b>  | 208.652627        | 399.271430     | 200.139353       |                |                  | 3  |
| 11 | <b>1203.673201</b> | 602.340239      | 1186.646652       | 593.826964        | 1185.662636       | 593.334956        | K    | <b>303.213915</b>  | 152.110595        | 286.187366     | 143.597321       |                |                  | 2  |
| 12 |                    |                 |                   |                   |                   |                   | R    | 175.118952         | 88.063114         | 158.092403     | 79.549839        |                |                  | 1  |

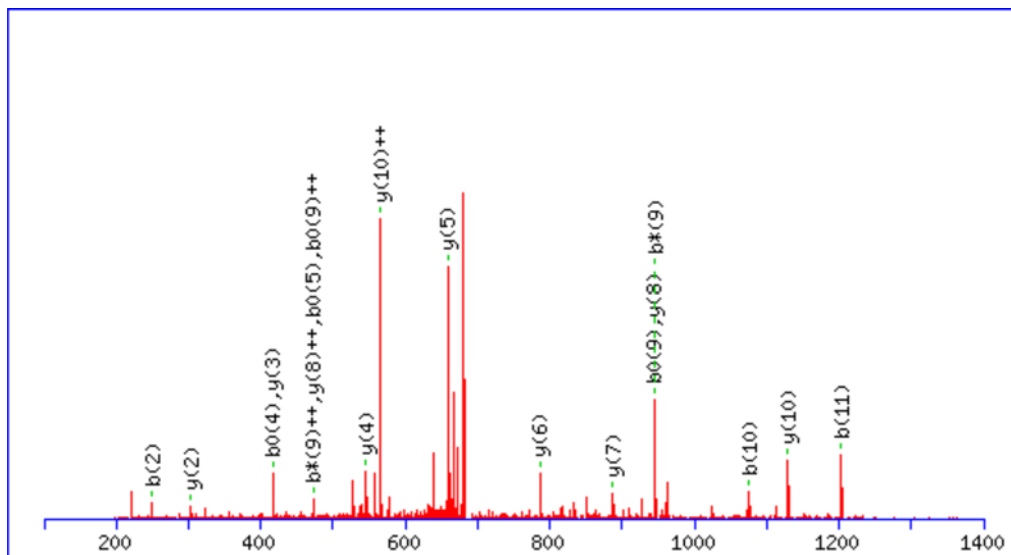

## Peptide View

MS/MS Fragmentation of **KGESGQSWPR**

Found in **IPI00015029**, Tax\_Id=9606 Gene\_Symbol=PTGES3 Prostaglandin E synthase 3

**Experiment:** 55 - PyD-1 **Fraction:** PyD-1

Match to Query 4699: 1130.544448 from(566.279500,2+)

Title: OECHL100310\_29.3933.3933.2.dta

Data file \\BOROMIR\Masse\Data LTQ-Orbitrap\Chrystelle Lacroix\Etude clinique sJPU\OECHL100310\_29.raw

**Monoisotopic mass of neutral peptide Mr(calc):** 1130.546860 **Fixed modifications:** Carbamidomethyl (C) (apply to specified residues or termini only) **Ions Score:** 56

**Expect:** 0.00028 **Matches :** 29/98 fragment ions using 58 most intense peaks ([help](#))

| # | b                 | b <sup>++</sup> | b*                | b <sup>*++</sup> | b <sup>0</sup>    | b <sup>0++</sup> | Seq.     | y                  | y <sup>++</sup> | y*                | y <sup>*++</sup> | y <sup>0</sup>    | y <sup>0++</sup> | #         |
|---|-------------------|-----------------|-------------------|------------------|-------------------|------------------|----------|--------------------|-----------------|-------------------|------------------|-------------------|------------------|-----------|
| 1 | 129.102239        | 65.054757       | 112.075690        | 56.541483        |                   |                  | <b>K</b> |                    |                 |                   |                  |                   |                  | <b>10</b> |
| 2 | <b>186.123703</b> | 93.565489       | 169.097154        | 85.052215        |                   |                  | <b>G</b> | <b>1003.459184</b> | 502.233230      | <b>986.432635</b> | 493.719956       | <b>985.448619</b> | 493.227948       | <b>9</b>  |
| 3 | <b>315.166296</b> | 158.086786      | <b>298.139747</b> | 149.573512       | <b>297.155731</b> | 149.081504       | <b>E</b> | <b>946.437720</b>  | 473.722498      | 929.411171        | 465.209224       | <b>928.427155</b> | 464.717216       | <b>8</b>  |
| 4 | 402.198324        | 201.602800      | <b>385.171775</b> | 193.089526       | <b>384.187759</b> | 192.597518       | <b>S</b> | <b>817.395127</b>  | 409.201202      | 800.368578        | 400.687927       | 799.384562        | 400.195919       | <b>7</b>  |
| 5 | <b>459.219788</b> | 230.113532      | 442.193239        | 221.600258       | 441.209223        | 221.108250       | <b>G</b> | <b>730.363099</b>  | 365.685188      | 713.336550        | 357.171913       | 712.352534        | 356.679905       | <b>6</b>  |
| 6 | 587.278366        | 294.142821      | <b>570.251817</b> | 285.629547       | 569.267801        | 285.137539       | <b>Q</b> | <b>673.341635</b>  | 337.174456      | <b>656.315086</b> | 328.661181       | <b>655.331070</b> | 328.169173       | <b>5</b>  |



|    |            |            |            |            |            |            |   |            |            |            |            |            |            |   |
|----|------------|------------|------------|------------|------------|------------|---|------------|------------|------------|------------|------------|------------|---|
| 7  | 674.310394 | 337.658835 | 657.283845 | 329.145560 | 656.299829 | 328.653552 | S | 545.283057 | 273.145167 | 528.256508 | 264.631892 | 527.272492 | 264.139884 | 4 |
| 8  | 860.389707 | 430.698492 | 843.363158 | 422.185217 | 842.379142 | 421.693209 | W | 458.251029 | 229.629153 | 441.224480 | 221.115878 |            |            | 3 |
| 9  | 957.442471 | 479.224874 | 940.415922 | 470.711599 | 939.431906 | 470.219591 | P | 272.171716 | 136.589496 | 255.145167 | 128.076221 |            |            | 2 |
| 10 |            |            |            |            |            |            | R | 175.118952 | 88.063114  | 158.092403 | 79.549839  |            |            | 1 |

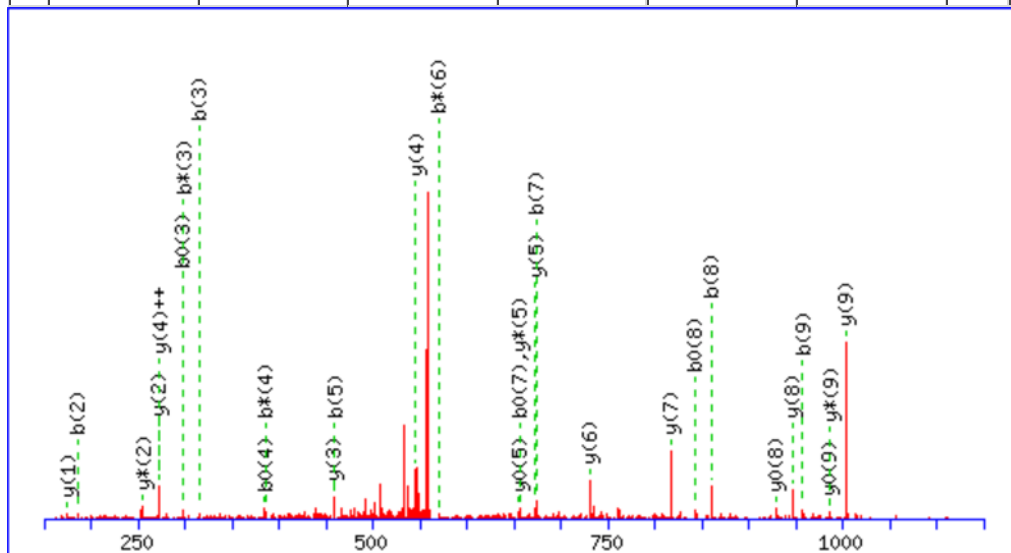

## Peptide View

MS/MS Fragmentation of **VATQEGKEITCR**

Found in **IP100031564**, Tax\_Id=9606 Gene\_Symbol=GGCT Isoform 1 of Gamma-glutamylcyclotransferase

Experiment: 55 - PyD-1 Fraction: PyD-1

Match to Query 8334: 1390.686848 from(696.350700,2+)

Title: OECHL100310\_29.3539.3539.2.dta

Data file \\BOROMIR\Masse\Data LTQ-Orbitrap\Chrystelle Lacroix\Etude clinique sJPU\OECHL100310\_29.raw

**Monoisotopic mass of neutral peptide Mr(calc): 1390.687454** Fixed modifications: Carbamidomethyl (C) (apply to specified residues or termini only) **Ions Score: 50**

**Expect: 0.0013** Matches : 17/118 fragment ions using 36 most intense peaks ([help](#))

| # | b          | b <sup>++</sup> | b <sup>*</sup> | b <sup>*++</sup> | b <sup>0</sup> | b <sup>0++</sup> | Seq. | y           | y <sup>++</sup> | y <sup>*</sup> | y <sup>*++</sup> | y <sup>0</sup> | y <sup>0++</sup> | #  |
|---|------------|-----------------|----------------|------------------|----------------|------------------|------|-------------|-----------------|----------------|------------------|----------------|------------------|----|
| 1 | 100.075690 | 50.541483       |                |                  |                |                  | V    |             |                 |                |                  |                |                  | 12 |
| 2 | 171.112804 | 86.060040       |                |                  |                |                  | A    | 1292.626328 | 646.816802      | 1275.599779    | 638.303528       | 1274.615763    | 637.811520       | 11 |

|    |             |            |             |            |             |            |   |             |            |             |            |             |            |    |
|----|-------------|------------|-------------|------------|-------------|------------|---|-------------|------------|-------------|------------|-------------|------------|----|
| 3  | 272.160483  | 136.583879 |             |            | 254.149918  | 127.578597 | T | 1221.589214 | 611.298245 | 1204.562665 | 602.784971 | 1203.578649 | 602.292963 | 10 |
| 4  | 400.219061  | 200.613169 | 383.192512  | 192.099894 | 382.208496  | 191.607886 | Q | 1120.541535 | 560.774406 | 1103.514986 | 552.261131 | 1102.530970 | 551.769123 | 9  |
| 5  | 529.261654  | 265.134465 | 512.235105  | 256.621191 | 511.251089  | 256.129183 | E | 992.482957  | 496.745117 | 975.456408  | 488.231842 | 974.472392  | 487.739834 | 8  |
| 6  | 586.283118  | 293.645197 | 569.256569  | 285.131923 | 568.272553  | 284.639915 | G | 863.440364  | 432.223820 | 846.413815  | 423.710546 | 845.429799  | 423.218538 | 7  |
| 7  | 714.378081  | 357.692679 | 697.351532  | 349.179404 | 696.367516  | 348.687396 | K | 806.418900  | 403.713088 | 789.392351  | 395.199814 | 788.408335  | 394.707806 | 6  |
| 8  | 843.420674  | 422.213975 | 826.394125  | 413.700701 | 825.410109  | 413.208693 | E | 678.323937  | 339.665607 | 661.297388  | 331.152332 | 660.313372  | 330.660324 | 5  |
| 9  | 956.504738  | 478.756007 | 939.478189  | 470.242733 | 938.494173  | 469.750725 | I | 549.281344  | 275.144310 | 532.254795  | 266.631036 | 531.270779  | 266.139028 | 4  |
| 10 | 1057.552417 | 529.279847 | 1040.525868 | 520.766572 | 1039.541852 | 520.274564 | T | 436.197280  | 218.602278 | 419.170731  | 210.089003 | 418.186715  | 209.596995 | 3  |
| 11 | 1217.583066 | 609.295171 | 1200.556517 | 600.781897 | 1199.572501 | 600.289889 | C | 335.149601  | 168.078438 | 318.123052  | 159.565164 |             |            | 2  |
| 12 |             |            |             |            |             |            | R | 175.118952  | 88.063114  | 158.092403  | 79.549839  |             |            | 1  |

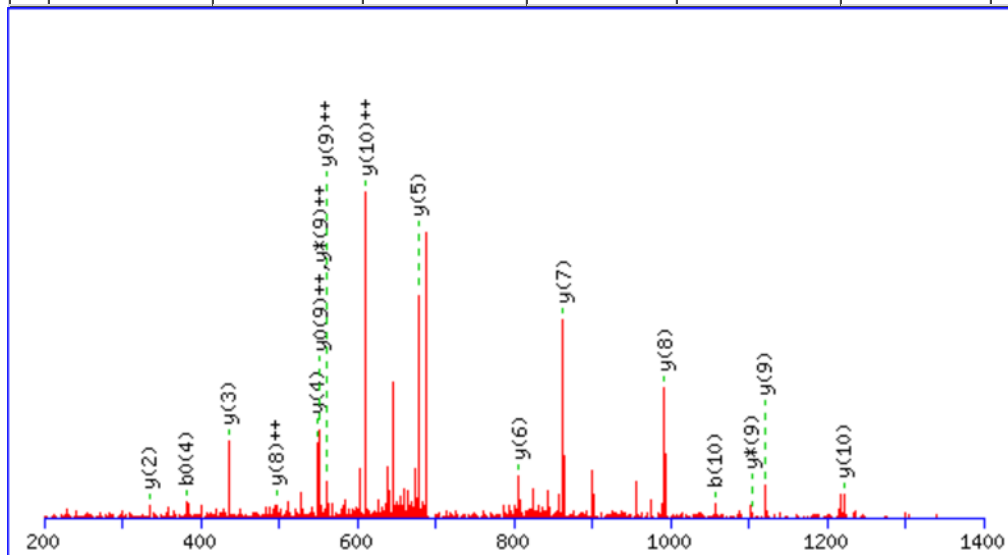

## Peptide View

MS/MS Fragmentation of **SGAPAAESKEIVR**

Found in **IP100299977**, Tax\_Id=9606 Gene\_Symbol=PHPT1 14 kDa phosphohistidine phosphatase

**Experiment:** 55 - PyD-1 **Fraction:** PyD-1

Match to Query 7670: 1313.694648 from(657.854600,2+)

Title: OECHL100310\_29.4497.4497.2.dta

Data file \\BOROMIR\Masse\Data LTQ-Orbitrap\Chrystelle Lacroix\Etude clinique sJPU\OECHL100310\_29.raw

**Monoisotopic mass of neutral peptide Mr(calc):** 1313.693893**Fixed modifications:** Carbamidomethyl (C) (apply to specified residues or termini only)**Ions Score:** 51**Expect:** 0.00086**Matches :** 27/122 fragment ions using 55 most intense peaks ([help](#))

| #  | b           | b <sup>++</sup> | b*          | b <sup>*++</sup> | b <sup>0</sup> | b <sup>0++</sup> | Seq. | y           | y <sup>++</sup> | y*          | y <sup>*++</sup> | y <sup>0</sup> | y <sup>0++</sup> | #  |
|----|-------------|-----------------|-------------|------------------|----------------|------------------|------|-------------|-----------------|-------------|------------------|----------------|------------------|----|
| 1  | 88.039304   | 44.523290       |             |                  | 70.028739      | 35.518008        | S    |             |                 |             |                  |                |                  | 13 |
| 2  | 145.060768  | 73.034022       |             |                  | 127.050203     | 64.028740        | G    | 1227.669177 | 614.338227      | 1210.642628 | 605.824952       | 1209.658612    | 605.332944       | 12 |
| 3  | 216.097882  | 108.552579      |             |                  | 198.087317     | 99.547296        | A    | 1170.647713 | 585.827495      | 1153.621164 | 577.314220       | 1152.637148    | 576.822212       | 11 |
| 4  | 313.150646  | 157.078961      |             |                  | 295.140081     | 148.073679       | P    | 1099.610599 | 550.308938      | 1082.584050 | 541.795663       | 1081.600034    | 541.303655       | 10 |
| 5  | 384.187760  | 192.597518      |             |                  | 366.177195     | 183.592235       | A    | 1002.557835 | 501.782556      | 985.531286  | 493.269281       | 984.547270     | 492.777273       | 9  |
| 6  | 455.224874  | 228.116075      |             |                  | 437.214309     | 219.110792       | A    | 931.520721  | 466.263999      | 914.494172  | 457.750724       | 913.510156     | 457.258716       | 8  |
| 7  | 584.267467  | 292.637372      |             |                  | 566.256902     | 283.632089       | E    | 860.483607  | 430.745442      | 843.457058  | 422.232167       | 842.473042     | 421.740159       | 7  |
| 8  | 671.299495  | 336.153386      |             |                  | 653.288930     | 327.148103       | S    | 731.441014  | 366.224145      | 714.414465  | 357.710871       | 713.430449     | 357.218863       | 6  |
| 9  | 799.394458  | 400.200867      | 782.367909  | 391.687592       | 781.383893     | 391.195585       | K    | 644.408986  | 322.708131      | 627.382437  | 314.194857       | 626.398421     | 313.702849       | 5  |
| 10 | 928.437051  | 464.722164      | 911.410502  | 456.208889       | 910.426486     | 455.716881       | E    | 516.314023  | 258.660650      | 499.287474  | 250.147375       | 498.303458     | 249.655367       | 4  |
| 11 | 1041.521115 | 521.264196      | 1024.494566 | 512.750921       | 1023.510550    | 512.258913       | I    | 387.271430  | 194.139353      | 370.244881  | 185.626079       |                |                  | 3  |
| 12 | 1140.589529 | 570.798403      | 1123.562980 | 562.285128       | 1122.578964    | 561.793120       | V    | 274.187366  | 137.597321      | 257.160817  | 129.084047       |                |                  | 2  |
| 13 |             |                 |             |                  |                |                  | R    | 175.118952  | 88.063114       | 158.092403  | 79.549839        |                |                  | 1  |

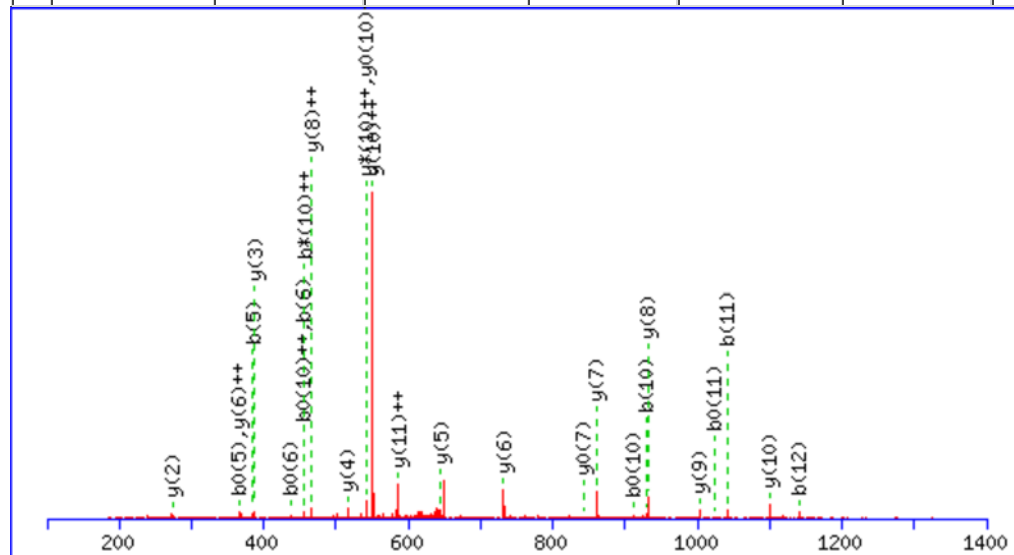

## Peptide View

MS/MS Fragmentation of **NPVLQQDAHSSVTITPQR**

Found in **IPI00410488**, Tax\_Id=9606 Gene\_Symbol=CD276 Isoform 1 of CD276 antigen

**Experiment:** 40 - OPD-1 **Fraction:** OPD-1

Match to Query 12071: 1990.022848 from(996.018700,2+)

Title: OECHL100310\_27.9367.9367.2.dta

Data file \\BOROMIR\Masse\Data LTQ-Orbitrap\Chrystelle Lacroix\Etude clinique sJPU\OECHL100310\_27.raw

**Monoisotopic mass of neutral peptide Mr(calc):** 1990.023209 **Fixed modifications:** Carbamidomethyl (C) (apply to specified residues or termini only) **Ions Score:** 84

**Expect:** 5e-007 **Matches :** 45/186 fragment ions using 81 most intense peaks ([help](#))

| #  | b                  | b <sup>++</sup>   | b*                 | b* <sup>++</sup>  | b <sup>0</sup>     | b <sup>0++</sup>  | Seq. | y                  | y <sup>++</sup>   | y*                 | y* <sup>++</sup>  | y <sup>0</sup> | y <sup>0++</sup>  | #  |
|----|--------------------|-------------------|--------------------|-------------------|--------------------|-------------------|------|--------------------|-------------------|--------------------|-------------------|----------------|-------------------|----|
| 1  | 115.050203         | 58.028740         | 98.023654          | 49.515465         |                    |                   | N    |                    |                   |                    |                   |                |                   | 18 |
| 2  | 212.102967         | 106.555121        | 195.076418         | 98.041847         |                    |                   | P    | 1876.987553        | 938.997415        | 1859.961004        | 930.484140        | 1858.976988    | 929.992132        | 17 |
| 3  | <b>311.171381</b>  | 156.089328        | <b>294.144832</b>  | 147.576054        |                    |                   | V    | <b>1779.934789</b> | <b>890.471033</b> | 1762.908240        | <b>881.957758</b> | 1761.924224    | <b>881.465750</b> | 16 |
| 4  | <b>424.255445</b>  | 212.631361        | <b>407.228896</b>  | 204.118086        |                    |                   | L    | <b>1680.866375</b> | <b>840.936826</b> | 1663.839826        | 832.423551        | 1662.855810    | 831.931543        | 15 |
| 5  | <b>552.314023</b>  | 276.660650        | <b>535.287474</b>  | 268.147375        |                    |                   | Q    | <b>1567.782311</b> | <b>784.394794</b> | 1550.755762        | 775.881519        | 1549.771746    | 775.389511        | 14 |
| 6  | <b>680.372601</b>  | 340.689939        | 663.346052         | 332.176664        |                    |                   | Q    | <b>1439.723733</b> | 720.365505        | 1422.697184        | 711.852230        | 1421.713168    | 711.360222        | 13 |
| 7  | 795.399544         | 398.203410        | 778.372995         | 389.690136        | 777.388979         | 389.198128        | D    | <b>1311.665155</b> | 656.336215        | 1294.638606        | 647.822941        | 1293.654590    | 647.330933        | 12 |
| 8  | 866.436658         | 433.721967        | 849.410109         | 425.208693        | 848.426093         | <b>424.716685</b> | A    | <b>1196.638212</b> | 598.822744        | <b>1179.611663</b> | 590.309470        | 1178.627647    | 589.817462        | 11 |
| 9  | <b>1003.495570</b> | <b>502.251423</b> | 986.469021         | 493.738149        | 985.485005         | 493.246141        | H    | <b>1125.601098</b> | 563.304187        | 1108.574549        | 554.790913        | 1107.590533    | 554.298905        | 10 |
| 10 | <b>1090.527598</b> | 545.767437        | 1073.501049        | 537.254163        | 1072.517033        | 536.762155        | S    | <b>988.542186</b>  | 494.774731        | 971.515637         | 486.261457        | 970.531621     | 485.769449        | 9  |
| 11 | <b>1177.559626</b> | 589.283451        | 1160.533077        | 580.770177        | 1159.549061        | 580.278169        | S    | <b>901.510158</b>  | 451.258717        | 884.483609         | 442.745443        | 883.499593     | 442.253435        | 8  |
| 12 | <b>1276.628040</b> | 638.817658        | 1259.601491        | 630.304384        | <b>1258.617475</b> | 629.812376        | V    | <b>814.478130</b>  | 407.742703        | 797.451581         | 399.229428        | 796.467565     | 398.737420        | 7  |
| 13 | <b>1377.675719</b> | 689.341498        | <b>1360.649170</b> | <b>680.828223</b> | 1359.665154        | <b>680.336215</b> | T    | <b>715.409716</b>  | 358.208496        | 698.383167         | 349.695221        | 697.399151     | 349.203213        | 6  |
| 14 | <b>1490.759783</b> | 745.883530        | <b>1473.733234</b> | 737.370255        | <b>1472.749218</b> | 736.878247        | I    | <b>614.362037</b>  | 307.684656        | 597.335488         | 299.171382        | 596.351472     | 298.679374        | 5  |
| 15 | <b>1591.807462</b> | 796.407369        | 1574.780913        | 787.894095        | <b>1573.796897</b> | 787.402087        | T    | <b>501.277973</b>  | 251.142624        | 484.251424         | 242.629350        | 483.267408     | 242.137342        | 4  |
| 16 | 1688.860226        | 844.933751        | 1671.833677        | 836.420477        | 1670.849661        | 835.928469        | P    | <b>400.230294</b>  | 200.618785        | <b>383.203745</b>  | 192.105510        |                |                   | 3  |
| 17 | <b>1816.918804</b> | 908.963040        | 1799.892255        | 900.449766        | 1798.908239        | 899.957758        | Q    | 303.177530         | 152.092403        | 286.150981         | 143.579128        |                |                   | 2  |
| 18 |                    |                   |                    |                   |                    |                   | R    | 175.118952         | 88.063114         | 158.092403         | 79.549839         |                |                   | 1  |

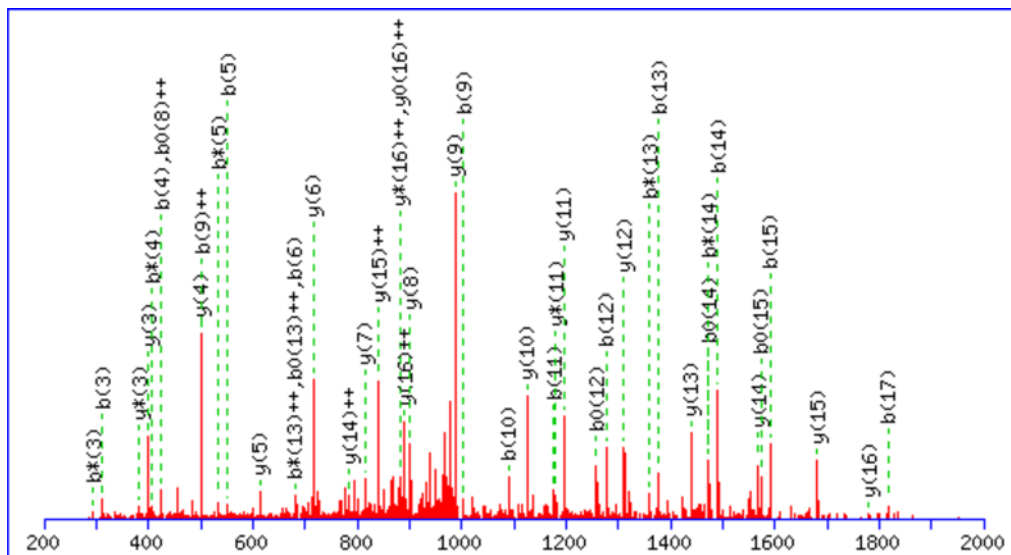

## Peptide View

MS/MS Fragmentation of **VTATGFQQCSLIDGR**

Found in **IPI00333140**, Tax\_Id=9606 Gene\_Symbol=DNER Delta and Notch-like epidermal growth factor-related receptor

**Experiment:** 40 - OPD-1 **Fraction:** OPD-1

Match to Query 9731: 1651.800848 from(826.907700,2+)

Title: OECHL100310\_27.13267.13267.2.dta

Data file \\BOROMIR\Masse\Data LTQ-Orbitrap\Chrystelle Lacroix\Etude clinique sJPU\OECHL100310\_27.raw

**Monoisotopic mass of neutral peptide Mr(calc):** 1651.798828 **Fixed modifications:** Carbamidomethyl (C) (apply to specified residues or termini only) **Ions Score:** 84

**Expect:** 4.9e-007 **Matches :** 41/150 fragment ions using 69 most intense peaks ([help](#))

| # | b                 | b <sup>++</sup> | b* | b* <sup>++</sup> | b <sup>0</sup>    | b <sup>0++</sup> | Seq. | y                  | y <sup>++</sup>   | y*                 | y* <sup>++</sup>  | y <sup>0</sup> | y <sup>0++</sup>  | #  |
|---|-------------------|-----------------|----|------------------|-------------------|------------------|------|--------------------|-------------------|--------------------|-------------------|----------------|-------------------|----|
| 1 | 100.075690        | 50.541483       |    |                  |                   |                  | V    |                    |                   |                    |                   |                |                   | 15 |
| 2 | 201.123369        | 101.065322      |    |                  | 183.112804        | 92.060040        | T    | 1553.737670        | 777.372473        | 1536.711121        | 768.859198        | 1535.727105    | 768.367190        | 14 |
| 3 | <b>272.160483</b> | 136.583879      |    |                  | 254.149918        | 127.578597       | A    | <b>1452.689991</b> | <b>726.848633</b> | 1435.663442        | <b>718.335359</b> | 1434.679426    | <b>717.843351</b> | 13 |
| 4 | <b>373.208162</b> | 187.107719      |    |                  | <b>355.197597</b> | 178.102437       | T    | <b>1381.652877</b> | <b>691.330076</b> | <b>1364.626328</b> | 682.816802        | 1363.642312    | 682.324794        | 12 |
| 5 | 430.229626        | 215.618451      |    |                  | <b>412.219061</b> | 206.613169       | G    | <b>1280.605198</b> | 640.806237        | 1263.578649        | 632.292962        | 1262.594633    | 631.800954        | 11 |
| 6 | <b>577.298040</b> | 289.152658      |    |                  | <b>559.287475</b> | 280.147376       | F    | <b>1223.583734</b> | <b>612.295505</b> | 1206.557185        | 603.782230        | 1205.573169    | 603.290222        | 10 |

|    |                    |            |                    |            |                    |                   |   |                    |            |                    |            |                   |            |   |
|----|--------------------|------------|--------------------|------------|--------------------|-------------------|---|--------------------|------------|--------------------|------------|-------------------|------------|---|
| 7  | <b>705.356618</b>  | 353.181947 | 688.330069         | 344.668673 | 687.346053         | 344.176665        | Q | <b>1076.515320</b> | 538.761298 | <b>1059.488771</b> | 530.248023 | 1058.504755       | 529.756015 | 9 |
| 8  | 833.415196         | 417.211236 | 816.388647         | 408.697962 | 815.404631         | 408.205954        | Q | <b>948.456742</b>  | 474.732009 | <b>931.430193</b>  | 466.218734 | <b>930.446177</b> | 465.726726 | 8 |
| 9  | 993.445845         | 497.226561 | 976.419296         | 488.713286 | <b>975.435280</b>  | 488.221278        | C | <b>820.398164</b>  | 410.702720 | <b>803.371615</b>  | 402.189445 | 802.387599        | 401.697437 | 7 |
| 10 | 1080.477873        | 540.742575 | 1063.451324        | 532.229300 | <b>1062.467308</b> | <b>531.737292</b> | S | <b>660.367515</b>  | 330.687395 | 643.340966         | 322.174121 | 642.356950        | 321.682113 | 6 |
| 11 | <b>1193.561937</b> | 597.284607 | 1176.535388        | 588.771332 | <b>1175.551372</b> | 588.279324        | L | <b>573.335487</b>  | 287.171381 | 556.308938         | 278.658107 | 555.324922        | 278.166099 | 5 |
| 12 | <b>1306.646001</b> | 653.826638 | 1289.619452        | 645.313364 | <b>1288.635436</b> | 644.821356        | I | <b>460.251423</b>  | 230.629349 | 443.224874         | 222.116075 | <b>442.240858</b> | 221.624067 | 4 |
| 13 | <b>1421.672944</b> | 711.340110 | 1404.646395        | 702.826836 | 1403.662379        | 702.334827        | D | <b>347.167359</b>  | 174.087317 | <b>330.140810</b>  | 165.574043 | 329.156794        | 165.082035 | 3 |
| 14 | <b>1478.694408</b> | 739.850842 | <b>1461.667859</b> | 731.337567 | 1460.683843        | 730.845559        | G | <b>232.140416</b>  | 116.573846 | 215.113867         | 108.060571 |                   |            | 2 |
| 15 |                    |            |                    |            |                    |                   | R | 175.118952         | 88.063114  | 158.092403         | 79.549839  |                   |            | 1 |

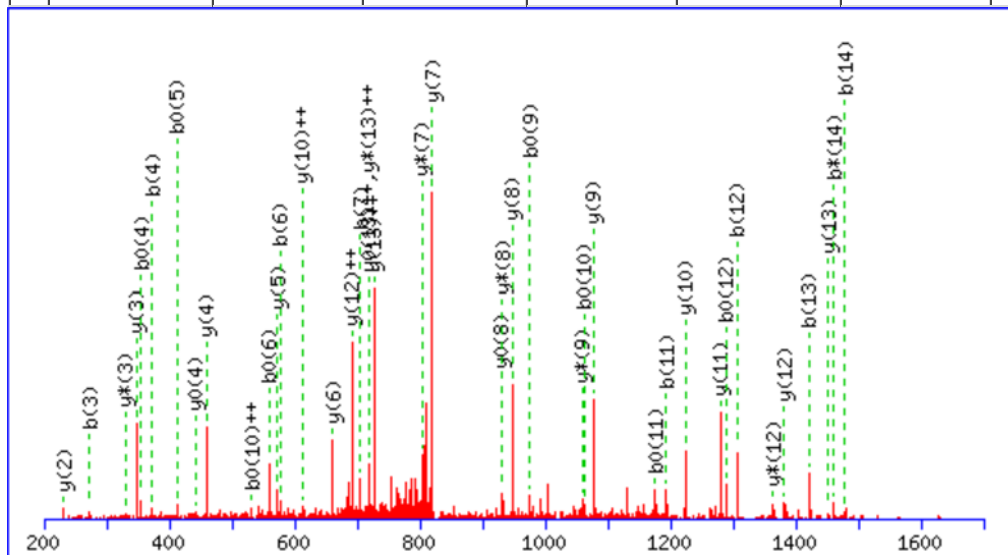

## Peptide View

MS/MS Fragmentation of **LLIYDASNLETGVPSR**

Found in **IP100003111**, Tax\_Id=9606 Gene\_Symbol=LOC652694 Ig kappa chain V-I region AU

**Experiment: 40 - OPD-1 Fraction: OPD-1**

Match to Query 10491: 1746.916848 from(874.465700,2+)

Title: OECHL100310\_27.16094.16094.2.dta

Data file \\BOROMIR\Masse\Data LTQ-Orbitrap\Chrystelle Lacroix\Etude clinique sJPU\OECHL100310\_27.raw

**Monoisotopic mass of neutral peptide Mr(calc):** 1746.915192**Fixed modifications:** Carbamidomethyl (C) (apply to specified residues or termini only)**Ions Score:** 77  
**Expect:** 2e-006**Matches :** 30/156 fragment ions using 58 most intense peaks ([help](#))

| #  | b                  | b <sup>++</sup>   | b*                 | b <sup>*++</sup> | b <sup>0</sup>     | b <sup>0++</sup> | Seq. | y                  | y <sup>++</sup>   | y*                | y <sup>*++</sup> | y <sup>0</sup>     | y <sup>0++</sup> | #  |
|----|--------------------|-------------------|--------------------|------------------|--------------------|------------------|------|--------------------|-------------------|-------------------|------------------|--------------------|------------------|----|
| 1  | 114.091340         | 57.549308         |                    |                  |                    |                  | L    |                    |                   |                   |                  |                    |                  | 16 |
| 2  | 227.175404         | 114.091340        |                    |                  |                    |                  | L    | <b>1634.838427</b> | 817.922852        | 1617.811878       | 809.409577       | 1616.827862        | 808.917569       | 15 |
| 3  | 340.259468         | 170.633372        |                    |                  |                    |                  | I    | <b>1521.754363</b> | 761.380820        | 1504.727814       | 752.867545       | 1503.743798        | 752.375537       | 14 |
| 4  | 503.322797         | 252.165036        |                    |                  |                    |                  | Y    | 1408.670299        | <b>704.838788</b> | 1391.643750       | 696.325513       | <b>1390.659734</b> | 695.833505       | 13 |
| 5  | 618.349740         | 309.678508        |                    |                  | 600.339175         | 300.673226       | D    | <b>1245.606970</b> | 623.307123        | 1228.580421       | 614.793849       | 1227.596405        | 614.301841       | 12 |
| 6  | 689.386854         | 345.197065        |                    |                  | 671.376289         | 336.191782       | A    | <b>1130.580027</b> | 565.793652        | 1113.553478       | 557.280377       | 1112.569462        | 556.788369       | 11 |
| 7  | 776.418882         | 388.713079        |                    |                  | 758.408317         | 379.707796       | S    | <b>1059.542913</b> | 530.275095        | 1042.516364       | 521.761820       | 1041.532348        | 521.269812       | 10 |
| 8  | 890.461809         | 445.734542        | <b>873.435260</b>  | 437.221268       | 872.451244         | 436.729260       | N    | <b>972.510885</b>  | 486.759081        | 955.484336        | 478.245806       | 954.500320         | 477.753798       | 9  |
| 9  | <b>1003.545873</b> | 502.276574        | <b>986.519324</b>  | 493.763300       | 985.535308         | 493.271292       | L    | <b>858.467958</b>  | 429.737617        | 841.441409        | 421.224343       | 840.457393         | 420.732335       | 8  |
| 10 | <b>1132.588466</b> | 566.797871        | 1115.561917        | 558.284597       | 1114.577901        | 557.792588       | E    | <b>745.383894</b>  | 373.195585        | 728.357345        | 364.682311       | <b>727.373329</b>  | 364.190303       | 7  |
| 11 | <b>1233.636145</b> | <b>617.321710</b> | 1216.609596        | 608.808436       | 1215.625580        | 608.316428       | T    | <b>616.341301</b>  | 308.674289        | 599.314752        | 300.161014       | 598.330736         | 299.669006       | 6  |
| 12 | <b>1290.657609</b> | 645.832442        | 1273.631060        | 637.319168       | 1272.647044        | 636.827160       | G    | <b>515.293622</b>  | 258.150449        | 498.267073        | 249.637175       | 497.283057         | 249.145167       | 5  |
| 13 | <b>1389.726023</b> | 695.366649        | <b>1372.699474</b> | 686.853375       | <b>1371.715458</b> | 686.361367       | V    | <b>458.272158</b>  | 229.639717        | 441.245609        | 221.126443       | 440.261593         | 220.634435       | 4  |
| 14 | <b>1486.778787</b> | 743.893032        | 1469.752238        | 735.379757       | 1468.768222        | 734.887749       | P    | <b>359.203744</b>  | 180.105510        | <b>342.177195</b> | 171.592236       | <b>341.193179</b>  | 171.100228       | 3  |
| 15 | <b>1573.810815</b> | 787.409046        | <b>1556.784266</b> | 778.895771       | 1555.800250        | 778.403763       | S    | 262.150980         | 131.579128        | 245.124431        | 123.065854       | 244.140415         | 122.573846       | 2  |
| 16 |                    |                   |                    |                  |                    |                  | R    | 175.118952         | 88.063114         | 158.092403        | 79.549839        |                    |                  | 1  |

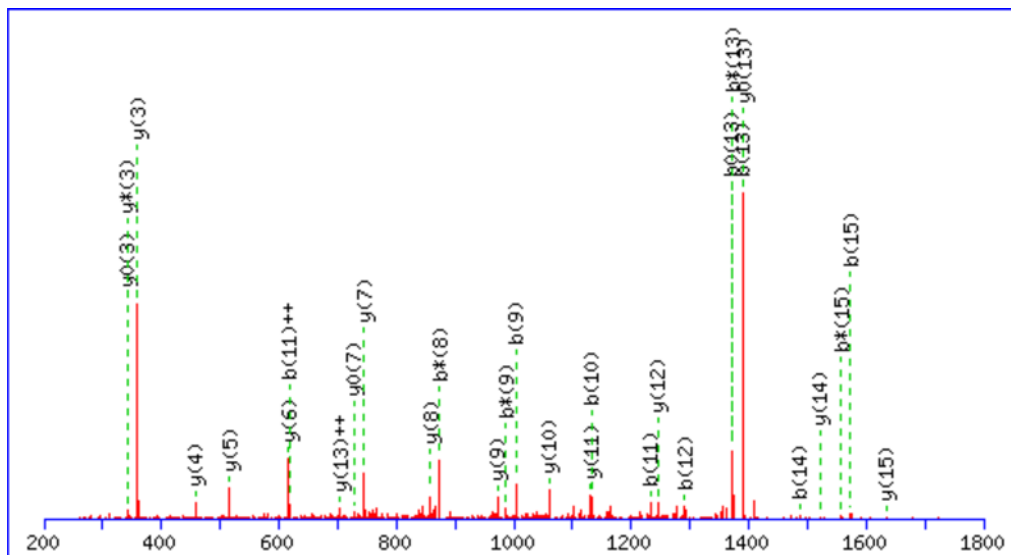

## Peptide View

MS/MS Fragmentation of **ASLQHGQAAEKGP~~H~~R**

Found in **IPI00165044**, Tax\_Id=9606 Gene\_Symbol=FAM198B Isoform 2 of Protein ENED

**Experiment:** 40 - OPD-1 **Fraction:** OPD-1

Match to Query 9224: 1585.808848 from(793.911700,2+)

Title: OECHL100310\_27.1671.1671.2.dta

Data file \\BOROMIR\Masse\Data LTQ-Orbitrap\Chrystelle Lacroix\Etude clinique sJPU\OECHL100310\_27.raw

**Monoisotopic mass of neutral peptide Mr(calc):** 1585.807312 **Fixed modifications:** Carbamidomethyl (C) (apply to specified residues or termini only) **Ions Score:** 59

**Expect:** 0.00016 **Matches :** 14/150 fragment ions using 13 most intense peaks ([help](#))

| # | b                 | b <sup>++</sup> | b*         | b <sup>*++</sup> | b <sup>0</sup>    | b <sup>0++</sup> | Seq.     | y                  | y <sup>++</sup>   | y*          | y <sup>*++</sup>  | y <sup>0</sup> | y <sup>0++</sup>  | #         |
|---|-------------------|-----------------|------------|------------------|-------------------|------------------|----------|--------------------|-------------------|-------------|-------------------|----------------|-------------------|-----------|
| 1 | 72.044390         | 36.525833       |            |                  |                   |                  | <b>A</b> |                    |                   |             |                   |                |                   | <b>15</b> |
| 2 | 159.076418        | 80.041847       |            |                  | 141.065853        | 71.036564        | <b>S</b> | 1515.777500        | 758.392388        | 1498.750951 | 749.879114        | 1497.766935    | 749.387106        | <b>14</b> |
| 3 | 272.160482        | 136.583879      |            |                  | <b>254.149917</b> | 127.578597       | <b>L</b> | 1428.745472        | 714.876374        | 1411.718923 | 706.363100        | 1410.734907    | 705.871092        | <b>13</b> |
| 4 | 400.219060        | 200.613168      | 383.192511 | 192.099894       | 382.208495        | 191.607886       | <b>Q</b> | 1315.661408        | 658.334342        | 1298.634859 | <b>649.821068</b> | 1297.650843    | <b>649.329060</b> | <b>12</b> |
| 5 | 537.277972        | 269.142624      | 520.251423 | 260.629350       | 519.267407        | 260.137342       | <b>H</b> | <b>1187.602830</b> | <b>594.305053</b> | 1170.576281 | 585.791779        | 1169.592265    | 585.299771        | <b>11</b> |
| 6 | <b>594.299436</b> | 297.653356      | 577.272887 | 289.140082       | 576.288871        | 288.648074       | <b>G</b> | <b>1050.543918</b> | 525.775597        | 1033.517369 | 517.262323        | 1032.533353    | 516.770315        | <b>10</b> |



|    |             |            |             |            |             |            |   |            |            |            |            |            |            |   |
|----|-------------|------------|-------------|------------|-------------|------------|---|------------|------------|------------|------------|------------|------------|---|
| 7  | 722.358014  | 361.682645 | 705.331465  | 353.169371 | 704.347449  | 352.677363 | Q | 993.522454 | 497.264865 | 976.495905 | 488.751591 | 975.511889 | 488.259583 | 9 |
| 8  | 793.395128  | 397.201202 | 776.368579  | 388.687928 | 775.384563  | 388.195920 | A | 865.463876 | 433.235576 | 848.437327 | 424.722302 | 847.453311 | 424.230294 | 8 |
| 9  | 864.432242  | 432.719759 | 847.405693  | 424.206485 | 846.421677  | 423.714477 | A | 794.426762 | 397.717019 | 777.400213 | 389.203745 | 776.416197 | 388.711737 | 7 |
| 10 | 993.474835  | 497.241056 | 976.448286  | 488.727781 | 975.464270  | 488.235773 | E | 723.389648 | 362.198462 | 706.363099 | 353.685188 | 705.379083 | 353.193180 | 6 |
| 11 | 1121.569798 | 561.288537 | 1104.543249 | 552.775263 | 1103.559233 | 552.283255 | K | 594.347055 | 297.677166 | 577.320506 | 289.163891 |            |            | 5 |
| 12 | 1178.591262 | 589.799269 | 1161.564713 | 581.285995 | 1160.580697 | 580.793987 | G | 466.252092 | 233.629684 | 449.225543 | 225.116409 |            |            | 4 |
| 13 | 1275.644026 | 638.325651 | 1258.617477 | 629.812377 | 1257.633461 | 629.320369 | P | 409.230628 | 205.118952 | 392.204079 | 196.605677 |            |            | 3 |
| 14 | 1412.702938 | 706.855107 | 1395.676389 | 698.341833 | 1394.692373 | 697.849825 | H | 312.177864 | 156.592570 | 295.151315 | 148.079295 |            |            | 2 |
| 15 |             |            |             |            |             |            | R | 175.118952 | 88.063114  | 158.092403 | 79.549839  |            |            | 1 |

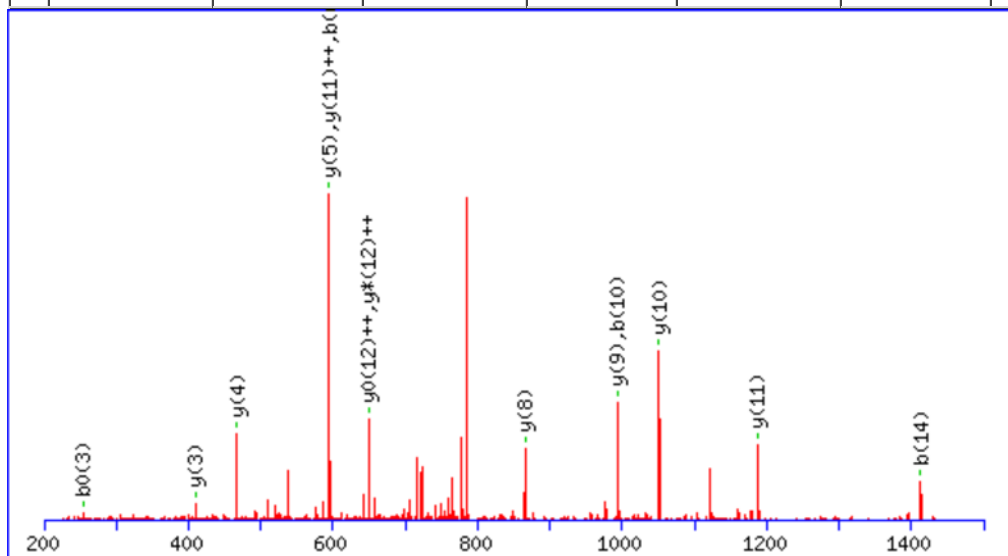

## Peptide View

MS/MS Fragmentation of **AVGLLTVISK**

Found in **IPI00013446**, Tax\_Id=9606 Gene\_Symbol=PSCA Prostate stem cell antigen

**Experiment:** 40 - OPD-1 **Fraction:** OPD-1

Match to Query 2473: 999.635448 from(500.825000,2+)

Title: OECHL100310\_27.16213.16213.2.dta

Data file \\BOROMIR\Masse\Data LTQ-Orbitrap\Chrystelle Lacroix\Etude clinique sJPU\OECHL100310\_27.raw

**Monoisotopic mass of neutral peptide Mr(calc):** 999.632828 **Fixed modifications:** Carbamidomethyl (C) (apply to specified residues or termini only) **Ions Score:** 63  
**Expect:** 5e-006 **Matches :** 16/78 fragment ions using 26 most intense peaks ([help](#))

| #  | b                 | b <sup>++</sup>   | b <sup>0</sup> | b <sup>0++</sup> | Seq. | y                 | y <sup>++</sup>   | y*         | y* <sup>++</sup> | y <sup>0</sup> | y <sup>0++</sup> | #  |
|----|-------------------|-------------------|----------------|------------------|------|-------------------|-------------------|------------|------------------|----------------|------------------|----|
| 1  | 72.044390         | 36.525833         |                |                  | A    |                   |                   |            |                  |                |                  | 10 |
| 2  | <b>171.112804</b> | 86.060040         |                |                  | V    | <b>929.602995</b> | 465.305136        | 912.576446 | 456.791861       | 911.592430     | 456.299853       | 9  |
| 3  | <b>228.134268</b> | 114.570772        |                |                  | G    | <b>830.534581</b> | <b>415.770929</b> | 813.508032 | 407.257654       | 812.524016     | 406.765646       | 8  |
| 4  | <b>341.218332</b> | <b>171.112804</b> |                |                  | L    | 773.513117        | 387.260197        | 756.486568 | 378.746922       | 755.502552     | 378.254914       | 7  |
| 5  | <b>454.302396</b> | 227.654836        |                |                  | L    | <b>660.429053</b> | 330.718165        | 643.402504 | 322.204890       | 642.418488     | 321.712882       | 6  |
| 6  | <b>555.350075</b> | 278.178676        | 537.339510     | 269.173393       | T    | <b>547.344989</b> | 274.176133        | 530.318440 | 265.662858       | 529.334424     | 265.170850       | 5  |
| 7  | <b>654.418489</b> | 327.712883        | 636.407924     | 318.707600       | V    | 446.297310        | 223.652293        | 429.270761 | 215.139018       | 428.286745     | 214.647010       | 4  |
| 8  | <b>767.502553</b> | 384.254915        | 749.491988     | 375.249632       | I    | <b>347.228896</b> | 174.118086        | 330.202347 | 165.604811       | 329.218331     | 165.112803       | 3  |
| 9  | <b>854.534581</b> | 427.770929        | 836.524016     | 418.765646       | S    | <b>234.144832</b> | 117.576054        | 217.118283 | 109.062779       | 216.134267     | 108.570771       | 2  |
| 10 |                   |                   |                |                  | K    | 147.112804        | 74.060040         | 130.086255 | 65.546765        |                |                  | 1  |

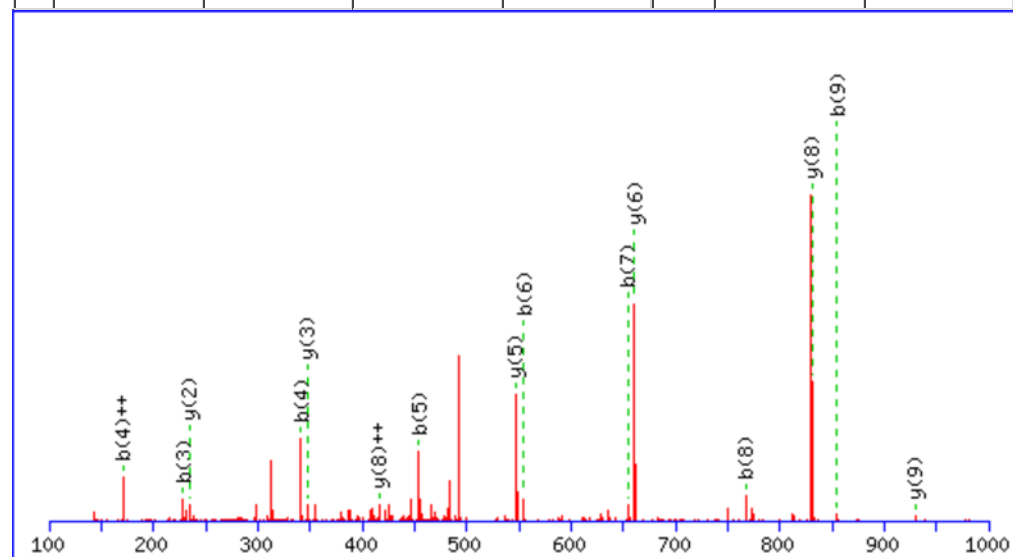

## Peptide View

MS/MS Fragmentation of **DFSLTSSSQTPGATK**

Found in **IPI00291300**, Tax\_Id=9606 Gene\_Symbol=PODXL2 Putative uncharacterized protein PODXL2

**Experiment: 40 - OPD-1 Fraction: OPD-1**

Match to Query 8676: 1525.726848 from(763.870700,2+)

Title: OECHL100310\_27.10434.10434.2.dta

Data file \\BOROMIR\Masse\Data LTQ-Orbitrap\Chrystelle Lacroix\Etude clinique sJPU\OECHL100310\_27.raw

**Monoisotopic mass of neutral peptide Mr(calc): 1525.726028**Fixed modifications: Carbamidomethyl (C) (apply to specified residues or termini only)**Ions Score: 60****Expect: 0.0001**Matches : 39/150 fragment ions using 90 most intense peaks ([help](#))

| #  | b                  | b <sup>++</sup> | b*                 | b <sup>*++</sup> | b <sup>0</sup>     | b <sup>0++</sup> | Seq. | y                  | y <sup>++</sup>   | y*                | y <sup>*++</sup>  | y <sup>0</sup>    | y <sup>0++</sup>  | #  |
|----|--------------------|-----------------|--------------------|------------------|--------------------|------------------|------|--------------------|-------------------|-------------------|-------------------|-------------------|-------------------|----|
| 1  | 116.034219         | 58.520748       |                    |                  | 98.023654          | 49.515465        | D    |                    |                   |                   |                   |                   |                   | 15 |
| 2  | <b>263.102633</b>  | 132.054954      |                    |                  | 245.092068         | 123.049672       | F    | 1411.706351        | 706.356813        | 1394.679802       | 697.843539        | 1393.695786       | 697.351531        | 14 |
| 3  | <b>350.134661</b>  | 175.570968      |                    |                  | <b>332.124096</b>  | 166.565686       | S    | <b>1264.637937</b> | <b>632.822607</b> | 1247.611388       | 624.309332        | 1246.627372       | 623.817324        | 13 |
| 4  | 463.218725         | 232.113001      |                    |                  | <b>445.208160</b>  | 223.107718       | L    | <b>1177.605909</b> | <b>589.306592</b> | 1160.579360       | 580.793318        | 1159.595344       | 580.301310        | 12 |
| 5  | <b>564.266404</b>  | 282.636840      |                    |                  | <b>546.255839</b>  | 273.631558       | T    | <b>1064.521845</b> | 532.764561        | 1047.495296       | 524.251286        | 1046.511280       | 523.759278        | 11 |
| 6  | <b>651.298432</b>  | 326.152854      |                    |                  | <b>633.287867</b>  | 317.147572       | S    | <b>963.474166</b>  | 482.240721        | 946.447617        | <b>473.727446</b> | 945.463601        | <b>473.235438</b> | 10 |
| 7  | <b>738.330460</b>  | 369.668868      |                    |                  | <b>720.319895</b>  | 360.663586       | S    | <b>876.442138</b>  | 438.724707        | 859.415589        | 430.211432        | 858.431573        | 429.719424        | 9  |
| 8  | <b>825.362488</b>  | 413.184882      |                    |                  | 807.351923         | 404.179599       | S    | <b>789.410110</b>  | 395.208693        | 772.383561        | 386.695418        | 771.399545        | 386.203410        | 8  |
| 9  | <b>953.421066</b>  | 477.214171      | 936.394517         | 468.700897       | <b>935.410501</b>  | 468.208889       | Q    | <b>702.378082</b>  | 351.692679        | <b>685.351533</b> | 343.179404        | 684.367517        | 342.687396        | 7  |
| 10 | <b>1054.468745</b> | 527.738010      | <b>1037.442196</b> | 519.224736       | <b>1036.458180</b> | 518.732728       | T    | <b>574.319504</b>  | 287.663390        | 557.292955        | 279.150115        | 556.308939        | 278.658107        | 6  |
| 11 | 1151.521509        | 576.264392      | 1134.494960        | 567.751118       | 1133.510944        | 567.259110       | P    | <b>473.271825</b>  | 237.139550        | 456.245276        | 228.626276        | <b>455.261260</b> | 228.134268        | 5  |
| 12 | 1208.542973        | 604.775124      | 1191.516424        | 596.261850       | 1190.532408        | 595.769842       | G    | <b>376.219061</b>  | 188.613168        | 359.192512        | 180.099894        | 358.208496        | 179.607886        | 4  |
| 13 | <b>1279.580087</b> | 640.293681      | 1262.553538        | 631.780407       | <b>1261.569522</b> | 631.288399       | A    | <b>319.197597</b>  | 160.102436        | 302.171048        | 151.589162        | 301.187032        | 151.097154        | 3  |
| 14 | <b>1380.627766</b> | 690.817521      | <b>1363.601217</b> | 682.304246       | <b>1362.617201</b> | 681.812238       | T    | <b>248.160483</b>  | 124.583879        | 231.133934        | 116.070605        | 230.149918        | 115.578597        | 2  |
| 15 |                    |                 |                    |                  |                    |                  | K    | 147.112804         | 74.060040         | 130.086255        | 65.546765         |                   |                   | 1  |

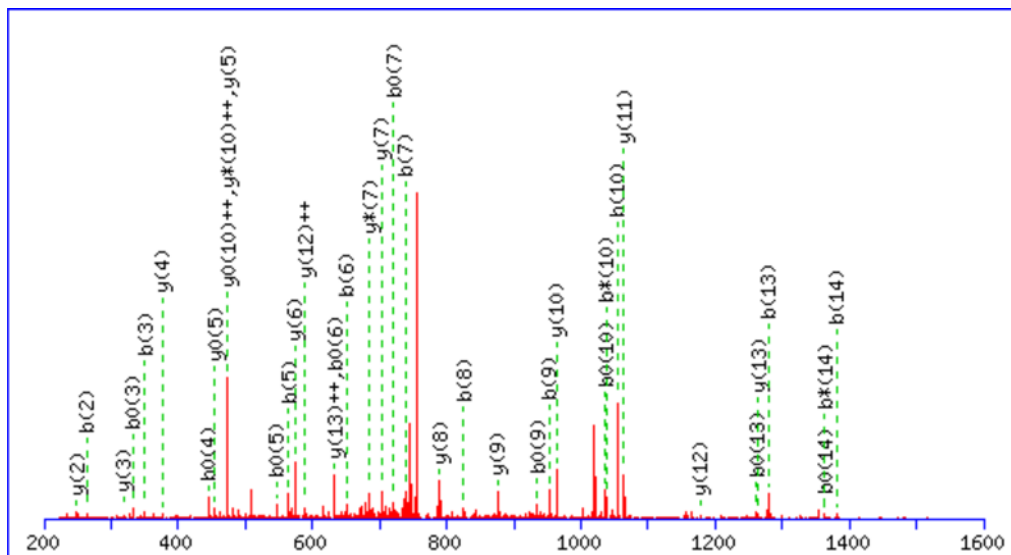

## Peptide View

MS/MS Fragmentation of **DAEEDDSLANSDDLKELLETDGDNRR**

Found in **IPI0000828**, Tax\_Id=9606 Gene\_Symbol=PENK Proenkephalin-A

Experiment: 40 - OPD-1 Fraction: OPD-1

Match to Query 15185: 3033.404172 from(1012.142000,3+)

Title: OECHL100310\_27.18231.18231.3.dta

Data file \\BOROMIR\Masse\Data LTQ-Orbitrap\Chrystelle Lacroix\Etude clinique sJPU\OECHL100310\_27.raw

**Monoisotopic mass of neutral peptide Mr(calc):** 3033.401001 **Fixed modifications:** Carbamidomethyl (C) (apply to specified residues or termini only) **Ions Score:** 92

**Expect:** 1.4e-007 **Matches :** 40/292 fragment ions using 68 most intense peaks ([help](#))

| # | b          | b <sup>++</sup> | b* | b* <sup>++</sup> | b <sup>0</sup> | b <sup>0++</sup> | Seq. | y           | y <sup>++</sup> | y*          | y* <sup>++</sup> | y <sup>0</sup> | y <sup>0++</sup> |
|---|------------|-----------------|----|------------------|----------------|------------------|------|-------------|-----------------|-------------|------------------|----------------|------------------|
| 1 | 116.034219 | 58.520748       |    |                  | 98.023654      | 49.515465        | D    |             |                 |             |                  |                |                  |
| 2 | 187.071333 | 94.039304       |    |                  | 169.060768     | 85.034022        | A    | 2919.381392 | 1460.194334     | 2902.354843 | 1451.681059      | 2901.370827    | 1451.1890        |
| 3 | 316.113926 | 158.560601      |    |                  | 298.103361     | 149.555319       | E    | 2848.344278 | 1424.675777     | 2831.317729 | 1416.162502      | 2830.333713    | 1415.6704        |
| 4 | 445.156519 | 223.081898      |    |                  | 427.145954     | 214.076615       | E    | 2719.301685 | 1360.154480     | 2702.275136 | 1351.641206      | 2701.291120    | 1351.1491        |
| 5 | 560.183462 | 280.595369      |    |                  | 542.172897     | 271.590087       | D    | 2590.259092 | 1295.633184     | 2573.232543 | 1287.119909      | 2572.248527    | 1286.6279        |
| 6 | 675.210405 | 338.108841      |    |                  | 657.199840     | 329.103558       | D    | 2475.232149 | 1238.119712     | 2458.205600 | 1229.606438      | 2457.221584    | 1229.1144        |

|    |                    |                    |             |                   |                   |                   |          |                   |                    |             |                   |             |                 |
|----|--------------------|--------------------|-------------|-------------------|-------------------|-------------------|----------|-------------------|--------------------|-------------|-------------------|-------------|-----------------|
| 7  | <b>762.242433</b>  | 381.624855         |             |                   | <b>744.231868</b> | 372.619572        | <b>S</b> | 2360.205206       | <b>1180.606241</b> | 2343.178657 | 1172.092966       | 2342.194641 | 1171.6009       |
| 8  | 875.326497         | 438.166887         |             |                   | 857.315932        | <b>429.161604</b> | <b>L</b> | 2273.173178       | <b>1137.090227</b> | 2256.146629 | 1128.576952       | 2255.162613 | 1128.0849       |
| 9  | 946.363611         | 473.685444         |             |                   | 928.353046        | 464.680161        | <b>A</b> | 2160.089114       | <b>1080.548195</b> | 2143.062565 | 1072.034920       | 2142.078549 | 1071.5429       |
| 10 | 1060.406538        | 530.706907         | 1043.379989 | 522.193633        | 1042.395973       | 521.701624        | <b>N</b> | 2089.052000       | <b>1045.029638</b> | 2072.025451 | 1036.516363       | 2071.041435 | 1036.0243       |
| 11 | 1147.438566        | <b>574.222921</b>  | 1130.412017 | 565.709647        | 1129.428001       | 565.217639        | <b>S</b> | 1975.009073       | <b>988.008174</b>  | 1957.982524 | 979.494900        | 1956.998508 | 979.0028        |
| 12 | 1234.470594        | 617.738935         | 1217.444045 | 609.225661        | 1216.460029       | 608.733653        | <b>S</b> | 1887.977045       | <b>944.492160</b>  | 1870.950496 | 935.978886        | 1869.966480 | 935.4868        |
| 13 | 1349.497537        | 675.252407         | 1332.470988 | <b>666.739132</b> | 1331.486972       | <b>666.247124</b> | <b>D</b> | 1800.945017       | 900.976146         | 1783.918468 | 892.462872        | 1782.934452 | 891.9708        |
| 14 | 1462.581601        | 731.794439         | 1445.555052 | 723.281164        | 1444.571036       | 722.789156        | <b>L</b> | 1685.918074       | <b>843.462675</b>  | 1668.891525 | 834.949400        | 1667.907509 | 834.4573        |
| 15 | <b>1575.665665</b> | 788.336471         | 1558.639116 | 779.823196        | 1557.655100       | 779.331188        | <b>L</b> | 1572.834010       | 786.920643         | 1555.807461 | 778.407368        | 1554.823445 | 777.9153        |
| 16 | 1703.760628        | 852.383952         | 1686.734079 | <b>843.870678</b> | 1685.750063       | <b>843.378670</b> | <b>K</b> | 1459.749946       | <b>730.378611</b>  | 1442.723397 | 721.865336        | 1441.739381 | 721.3733        |
| 17 | <b>1832.803221</b> | 916.905248         | 1815.776672 | 908.391974        | 1814.792656       | <b>907.899966</b> | <b>E</b> | 1331.654983       | <b>666.331129</b>  | 1314.628434 | <b>657.817855</b> | 1313.644418 | <b>657.3258</b> |
| 18 | <b>1945.887285</b> | 973.447280         | 1928.860736 | 964.934006        | 1927.876720       | 964.441998        | <b>L</b> | 1202.612390       | <b>601.809833</b>  | 1185.585841 | 593.296558        | 1184.601825 | 592.8045        |
| 19 | 2058.971349        | 1029.989312        | 2041.944800 | 1021.476038       | 2040.960784       | 1020.984030       | <b>L</b> | 1089.528326       | 545.267801         | 1072.501777 | 536.754526        | 1071.517761 | 536.2625        |
| 20 | 2188.013942        | 1094.510609        | 2170.987393 | 1085.997334       | 2170.003377       | 1085.505326       | <b>E</b> | 976.444262        | <b>488.725769</b>  | 959.417713  | 480.212494        | 958.433697  | 479.7204        |
| 21 | 2289.061621        | 1145.034448        | 2272.035072 | 1136.521174       | 2271.051056       | 1136.029166       | <b>T</b> | 847.401669        | <b>424.204472</b>  | 830.375120  | 415.691198        | 829.391104  | 415.1991        |
| 22 | 2346.083085        | 1173.545180        | 2329.056536 | 1165.031906       | 2328.072520       | 1164.539898       | <b>G</b> | 746.353990        | 373.680633         | 729.327441  | 365.167358        | 728.343425  | 364.6753        |
| 23 | 2461.110028        | <b>1231.058652</b> | 2444.083479 | 1222.545377       | 2443.099463       | 1222.053369       | <b>D</b> | 689.332526        | 345.169901         | 672.305977  | 336.656626        | 671.321961  | 336.1646        |
| 24 | 2575.152955        | <b>1288.080115</b> | 2558.126406 | 1279.566841       | 2557.142390       | 1279.074833       | <b>N</b> | <b>574.305583</b> | <b>287.656430</b>  | 557.279034  | 279.143155        | 556.295018  | 278.6511        |
| 25 | 2731.254066        | 1366.130671        | 2714.227517 | 1357.617396       | 2713.243501       | 1357.125388       | <b>R</b> | 460.262656        | 230.634966         | 443.236107  | 222.121692        | 442.252091  | 221.6296        |
| 26 | 2860.296659        | <b>1430.651967</b> | 2843.270110 | 1422.138693       | 2842.286094       | 1421.646685       | <b>E</b> | 304.161545        | 152.584411         | 287.134996  | 144.071136        | 286.150980  | 143.5791        |
| 27 |                    |                    |             |                   |                   |                   | <b>R</b> | 175.118952        | 88.063114          | 158.092403  | 79.549839         |             |                 |

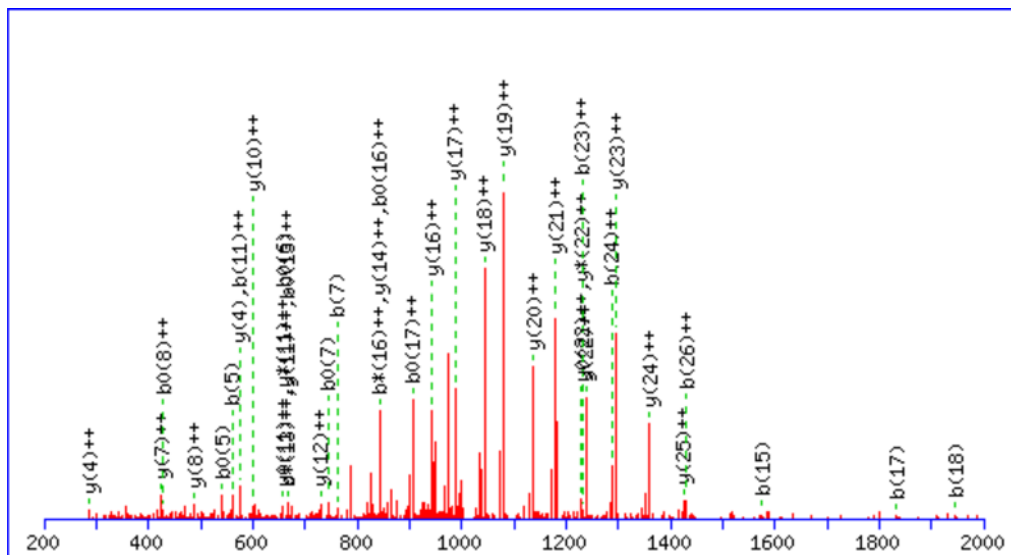

## Peptide View

MS/MS Fragmentation of **KAGPCEQAGSPCR**

Found in **IP100028381**, Tax\_Id=9606 Gene\_Symbol=DLK2 Isoform 1 of Protein delta homolog 2

**Experiment:** 40 - OPD-1 **Fraction:** OPD-1

Match to Query 7560: 1416.626048 from(709.320300,2+)

Title: OECHL100310\_27.1866.1866.2.dta

Data file \\BOROMIR\Masse\Data LTQ-Orbitrap\Chrystelle Lacroix\Etude clinique sJPU\OECHL100310\_27.raw

**Monoisotopic mass of neutral peptide Mr(calc):** 1416.623810 **Fixed modifications:** Carbamidomethyl (C) (apply to specified residues or termini only) **Ions Score:** 92

**Expect:** 4.3e-008 **Matches :** 25/128 fragment ions using 36 most intense peaks ([help](#))

| # | b          | b <sup>++</sup> | b <sup>*</sup> | b <sup>*++</sup> | b <sup>0</sup> | b <sup>0++</sup> | Seq.     | y                  | y <sup>++</sup>   | y <sup>*</sup>     | y <sup>*++</sup>  | y <sup>0</sup> | y <sup>0++</sup>  | #         |
|---|------------|-----------------|----------------|------------------|----------------|------------------|----------|--------------------|-------------------|--------------------|-------------------|----------------|-------------------|-----------|
| 1 | 129.102239 | 65.054757       | 112.075690     | 56.541483        |                |                  | <b>K</b> |                    |                   |                    |                   |                |                   | <b>13</b> |
| 2 | 200.139353 | 100.573315      | 183.112804     | 92.060040        |                |                  | <b>A</b> | <b>1289.536133</b> | <b>645.271705</b> | 1272.509584        | 636.758430        | 1271.525568    | 636.266422        | <b>12</b> |
| 3 | 257.160817 | 129.084047      | 240.134268     | 120.570772       |                |                  | <b>G</b> | <b>1218.499019</b> | <b>609.753148</b> | 1201.472470        | 601.239873        | 1200.488454    | 600.747865        | <b>11</b> |
| 4 | 354.213581 | 177.610429      | 337.187032     | 169.097154       |                |                  | <b>P</b> | <b>1161.477555</b> | <b>581.242416</b> | 1144.451006        | 572.729141        | 1143.466990    | 572.237133        | <b>10</b> |
| 5 | 514.244230 | 257.625753      | 497.217681     | 249.112479       |                |                  | <b>C</b> | <b>1064.424791</b> | 532.716034        | <b>1047.398242</b> | 524.202759        | 1046.414226    | 523.710751        | <b>9</b>  |
| 6 | 643.286823 | 322.147050      | 626.260274     | 313.633775       | 625.276258     | 313.141767       | <b>E</b> | <b>904.394142</b>  | 452.700709        | <b>887.367593</b>  | <b>444.187434</b> | 886.383577     | <b>443.695427</b> | <b>8</b>  |

|    |             |            |             |            |             |            |   |            |            |            |            |            |            |   |
|----|-------------|------------|-------------|------------|-------------|------------|---|------------|------------|------------|------------|------------|------------|---|
| 7  | 771.345401  | 386.176339 | 754.318852  | 377.663064 | 753.334836  | 377.171056 | Q | 775.351549 | 388.179413 | 758.325000 | 379.666138 | 757.340984 | 379.174130 | 7 |
| 8  | 842.382515  | 421.694896 | 825.355966  | 413.181621 | 824.371950  | 412.689613 | A | 647.292971 | 324.150124 | 630.266422 | 315.636849 | 629.282406 | 315.144841 | 6 |
| 9  | 899.403979  | 450.205628 | 882.377430  | 441.692353 | 881.393414  | 441.200345 | G | 576.255857 | 288.631567 | 559.229308 | 280.118292 | 558.245292 | 279.626284 | 5 |
| 10 | 986.436007  | 493.721642 | 969.409458  | 485.208367 | 968.425442  | 484.716359 | S | 519.234393 | 260.120835 | 502.207844 | 251.607560 | 501.223828 | 251.115552 | 4 |
| 11 | 1083.488771 | 542.248024 | 1066.462222 | 533.734749 | 1065.478206 | 533.242741 | P | 432.202365 | 216.604820 | 415.175816 | 208.091546 |            |            | 3 |
| 12 | 1243.519420 | 622.263348 | 1226.492871 | 613.750074 | 1225.508855 | 613.258066 | C | 335.149601 | 168.078438 | 318.123052 | 159.565164 |            |            | 2 |
| 13 |             |            |             |            |             |            | R | 175.118952 | 88.063114  | 158.092403 | 79.549839  |            |            | 1 |

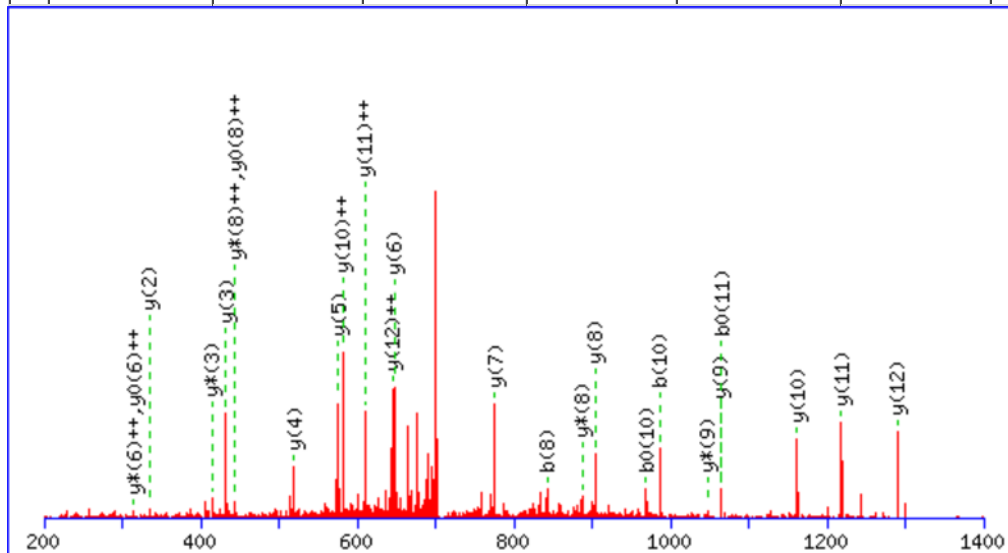

## Peptide View

MS/MS Fragmentation of **IESVLSSSGKR**

Found in **IPI00018236**, Tax\_Id=9606 Gene\_Symbol=GM2A Ganglioside GM2 activator

**Experiment:** 40 - OPD-1 **Fraction:** OPD-1

Match to Query 4581: 1161.635448 from(581.825000,2+)

Title: OECHL100310\_27.5100.5100.2.dta

Data file \\BOROMIR\Masse\Data LTQ-Orbitrap\Chrystelle Lacroix\Etude clinique sJPU\OECHL100310\_27.raw

**Monoisotopic mass of neutral peptide Mr(calc):** 1161.635330 **Fixed modifications:** Carbamidomethyl (C) (apply to specified residues or termini only) **Ions Score:** 70

**Expect:** 5.9e-006 **Matches :** 25/94 fragment ions using 40 most intense peaks ([help](#))

| #  | b                 | b <sup>++</sup>   | b*         | b <sup>*++</sup> | b <sup>0</sup>    | b <sup>0++</sup> | Seq. | y                  | y <sup>++</sup>   | y*                | y <sup>*++</sup>  | y <sup>0</sup>    | y <sup>0++</sup>  | #  |
|----|-------------------|-------------------|------------|------------------|-------------------|------------------|------|--------------------|-------------------|-------------------|-------------------|-------------------|-------------------|----|
| 1  | 114.091340        | 57.549308         |            |                  |                   |                  | I    |                    |                   |                   |                   |                   |                   | 11 |
| 2  | <b>243.133933</b> | 122.070605        |            |                  | 225.123368        | 113.065322       | E    | <b>1049.558562</b> | <b>525.282919</b> | 1032.532013       | 516.769645        | 1031.547997       | 516.277637        | 10 |
| 3  | <b>330.165961</b> | 165.586618        |            |                  | <b>312.155396</b> | 156.581336       | S    | <b>920.515969</b>  | <b>460.761623</b> | <b>903.489420</b> | 452.248348        | <b>902.505404</b> | 451.756340        | 9  |
| 4  | <b>429.234375</b> | <b>215.120826</b> |            |                  | <b>411.223810</b> | 206.115543       | V    | <b>833.483941</b>  | 417.245609        | 816.457392        | 408.732334        | 815.473376        | 408.240326        | 8  |
| 5  | 542.318439        | 271.662858        |            |                  | 524.307874        | 262.657575       | L    | <b>734.415527</b>  | <b>367.711402</b> | 717.388978        | 359.198127        | 716.404962        | 358.706119        | 7  |
| 6  | 629.350467        | 315.178872        |            |                  | 611.339902        | 306.173589       | S    | <b>621.331463</b>  | 311.169370        | 604.304914        | 302.656095        | 603.320898        | 302.164087        | 6  |
| 7  | 716.382495        | 358.694886        |            |                  | 698.371930        | 349.689603       | S    | <b>534.299435</b>  | 267.653356        | 517.272886        | 259.140081        | 516.288870        | 258.648073        | 5  |
| 8  | <b>803.414523</b> | 402.210899        |            |                  | 785.403958        | 393.205617       | S    | <b>447.267407</b>  | 224.137342        | 430.240858        | <b>215.624067</b> | <b>429.256842</b> | <b>215.132059</b> | 4  |
| 9  | 860.435987        | 430.721632        |            |                  | 842.425422        | 421.716349       | G    | <b>360.235379</b>  | 180.621328        | 343.208830        | 172.108053        |                   |                   | 3  |
| 10 | <b>988.530950</b> | 494.769113        | 971.504401 | 486.255838       | 970.520385        | 485.763830       | K    | 303.213915         | 152.110596        | 286.187366        | 143.597321        |                   |                   | 2  |
| 11 |                   |                   |            |                  |                   |                  | R    | <b>175.118952</b>  | 88.063114         | 158.092403        | 79.549840         |                   |                   | 1  |

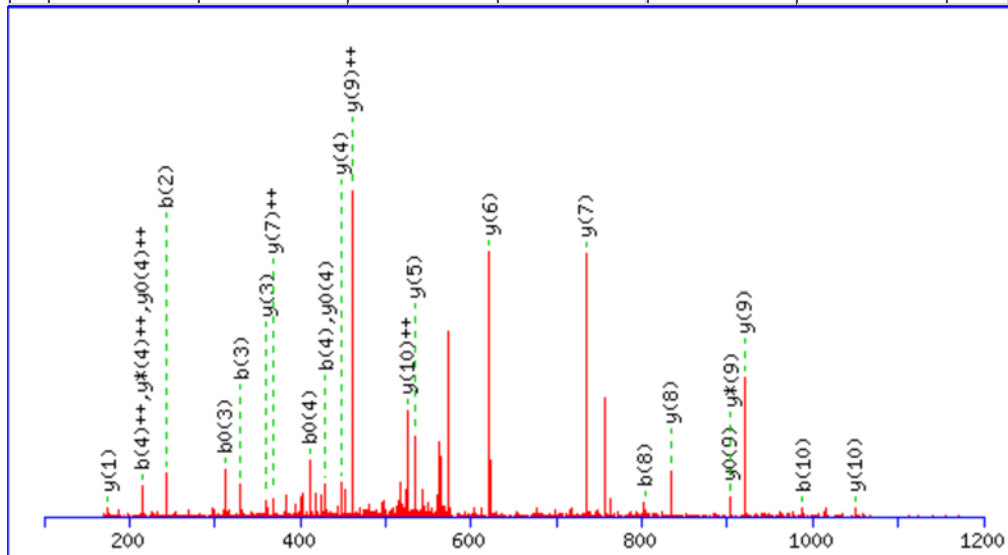

## Peptide View

MS/MS Fragmentation of **GLAEAAGPR**

Found in **IP100290826**, Tax\_Id=9606 Gene\_Symbol=FAM174A Membrane protein FAM174A



**Experiment:** 40 - OPD-1 **Fraction:** OPD-1

Match to Query 1010: 840.445248 from(421.229900,2+)

Title: OECHL100310\_27.3745.3745.2.dta

Data file \\BOROMIR\Masse\Data LTQ-Orbitrap\Chrystelle Lacroix\Etude clinique sJPU\OECHL100310\_27.raw

**Monoisotopic mass of neutral peptide Mr(calc):** 840.445343**Fixed modifications:** Carbamidomethyl (C) (apply to specified residues or termini only)**Ions Score:** 63**Expect:** 3.4e-005**Matches :** 11/64 fragment ions using 15 most intense peaks ([help](#))

| # | b                 | b <sup>++</sup> | b <sup>0</sup> | b <sup>0++</sup> | Seq. | y                 | y <sup>++</sup> | y*         | y <sup>*++</sup> | y <sup>0</sup> | y <sup>0++</sup> | # |
|---|-------------------|-----------------|----------------|------------------|------|-------------------|-----------------|------------|------------------|----------------|------------------|---|
| 1 | 58.028740         | 29.518008       |                |                  | G    |                   |                 |            |                  |                |                  | 9 |
| 2 | <b>171.112804</b> | 86.060040       |                |                  | L    | 784.431179        | 392.719228      | 767.404630 | 384.205953       | 766.420614     | 383.713945       | 8 |
| 3 | <b>242.149918</b> | 121.578597      |                |                  | A    | <b>671.347115</b> | 336.177196      | 654.320566 | 327.663921       | 653.336550     | 327.171913       | 7 |
| 4 | 371.192511        | 186.099894      | 353.181946     | 177.094611       | E    | <b>600.310001</b> | 300.658639      | 583.283452 | 292.145364       | 582.299436     | 291.653356       | 6 |
| 5 | 442.229625        | 221.618450      | 424.219060     | 212.613168       | A    | <b>471.267408</b> | 236.137342      | 454.240859 | 227.624067       |                |                  | 5 |
| 6 | <b>513.266739</b> | 257.137008      | 495.256174     | 248.131725       | A    | <b>400.230294</b> | 200.618785      | 383.203745 | 192.105510       |                |                  | 4 |
| 7 | <b>570.288203</b> | 285.647740      | 552.277638     | 276.642457       | G    | <b>329.193180</b> | 165.100228      | 312.166631 | 156.586953       |                |                  | 3 |
| 8 | 667.340967        | 334.174122      | 649.330402     | 325.168839       | P    | <b>272.171716</b> | 136.589496      | 255.145167 | 128.076221       |                |                  | 2 |
| 9 |                   |                 |                |                  | R    | <b>175.118952</b> | 88.063114       | 158.092403 | 79.549839        |                |                  | 1 |

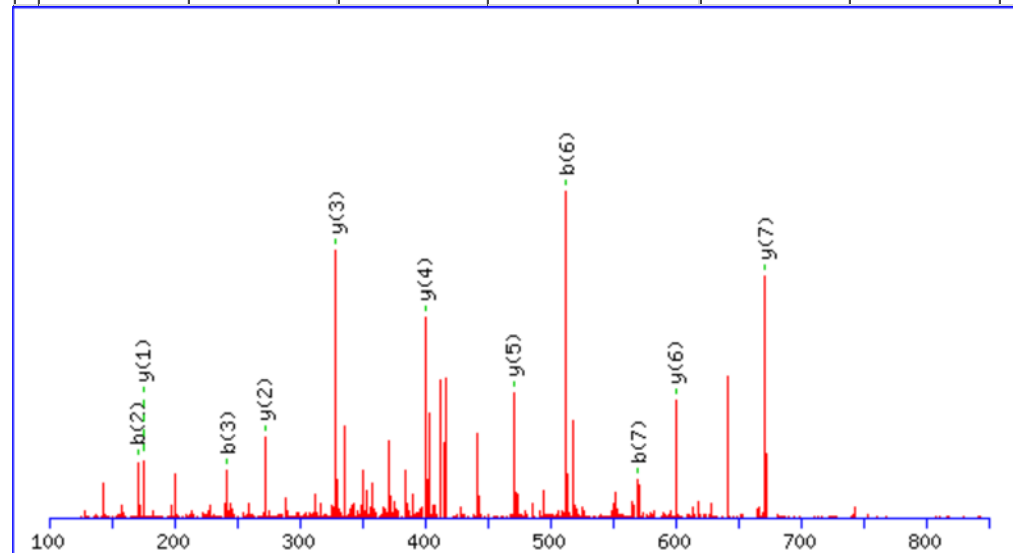

## Peptide View

MS/MS Fragmentation of **NSVNSHTIGR**

Found in **IPI00300376**, Tax\_Id=9606 Gene\_Symbol=TGM3 Protein-glutamine gamma-glutamyltransferase E

**Experiment:** 40 - OPD-1 **Fraction:** OPD-1

Match to Query 3621: 1083.542048 from(542.778300,2+)

Title: OECHL100310\_27.2386.2386.2.dta

Data file \\BOROMIR\Masse\Data LTQ-Orbitrap\Chrystelle Lacroix\Etude clinique sJPU\OECHL100310\_27.raw

**Monoisotopic mass of neutral peptide Mr(calc):** 1083.542114 **Fixed modifications:** Carbamidomethyl (C) (apply to specified residues or termini only) **Ions Score:** 60

**Expect:** 7.6e-005 **Matches :** 24/100 fragment ions using 38 most intense peaks ([help](#))

| #  | b                 | b <sup>++</sup> | b*                | b <sup>*++</sup> | b <sup>0</sup>    | b <sup>0++</sup>  | Seq. | y                 | y <sup>++</sup>   | y*         | y <sup>*++</sup>  | y <sup>0</sup>    | y <sup>0++</sup>  | #  |
|----|-------------------|-----------------|-------------------|------------------|-------------------|-------------------|------|-------------------|-------------------|------------|-------------------|-------------------|-------------------|----|
| 1  | 115.050203        | 58.028740       | 98.023654         | 49.515465        |                   |                   | N    |                   |                   |            |                   |                   |                   | 10 |
| 2  | <b>202.082231</b> | 101.544753      | 185.055682        | 93.031479        | 184.071666        | 92.539471         | S    | 970.506468        | 485.756872        | 953.479919 | 477.243598        | 952.495903        | 476.751590        | 9  |
| 3  | <b>301.150645</b> | 151.078960      | <b>284.124096</b> | 142.565686       | <b>283.140080</b> | 142.073678        | V    | <b>883.474440</b> | <b>442.240858</b> | 866.447891 | 433.727584        | 865.463875        | 433.235576        | 8  |
| 4  | 415.193572        | 208.100424      | 398.167023        | 199.587150       | 397.183007        | 199.095142        | N    | <b>784.406026</b> | <b>392.706651</b> | 767.379477 | 384.193377        | 766.395461        | 383.701369        | 7  |
| 5  | 502.225600        | 251.616438      | 485.199051        | 243.103164       | 484.215035        | 242.611156        | S    | <b>670.363099</b> | 335.685188        | 653.336550 | 327.171913        | 652.352534        | 326.679905        | 6  |
| 6  | <b>639.284512</b> | 320.145894      | <b>622.257963</b> | 311.632620       | 621.273947        | 311.140612        | H    | <b>583.331071</b> | 292.169174        | 566.304522 | <b>283.655899</b> | 565.320506        | <b>283.163891</b> | 5  |
| 7  | <b>740.332191</b> | 370.669734      | 723.305642        | 362.156459       | 722.321626        | 361.664451        | T    | <b>446.272159</b> | 223.639718        | 429.245610 | 215.126443        | <b>428.261594</b> | 214.634435        | 4  |
| 8  | 853.416255        | 427.211766      | <b>836.389706</b> | 418.698491       | <b>835.405690</b> | 418.206483        | I    | <b>345.224480</b> | 173.115878        | 328.197931 | 164.602604        |                   |                   | 3  |
| 9  | <b>910.437719</b> | 455.722498      | 893.411170        | 447.209223       | 892.427154        | <b>446.717215</b> | G    | <b>232.140416</b> | 116.573846        | 215.113867 | 108.060572        |                   |                   | 2  |
| 10 |                   |                 |                   |                  |                   |                   | R    | <b>175.118952</b> | 88.063114         | 158.092403 | 79.549840         |                   |                   | 1  |

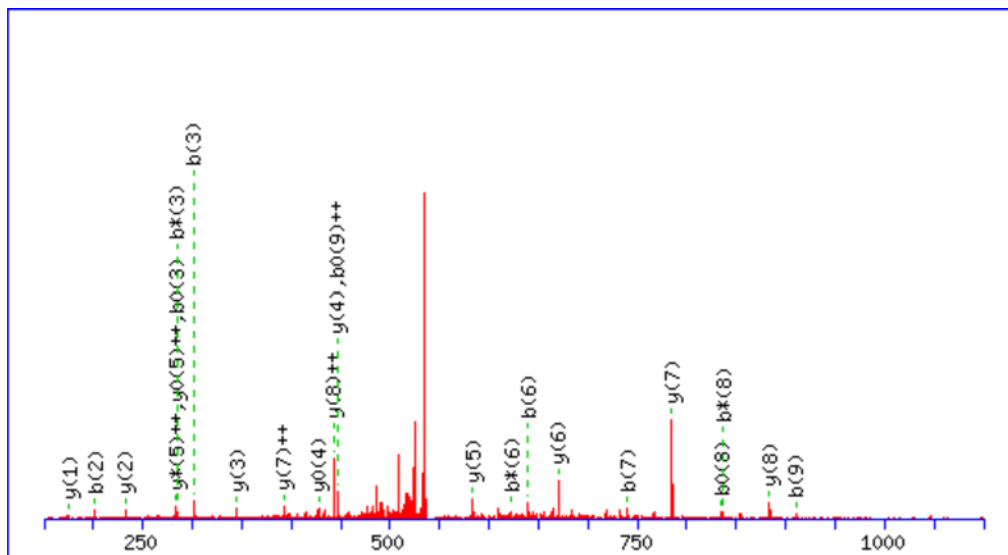

## Peptide View

MS/MS Fragmentation of **YSGSEGSTQTLTKGELK**

Found in **IPI00017526**, Tax\_Id=9606 Gene\_Symbol=S100P Protein S100-P

**Experiment:** 40 - OPD-1 **Fraction:** OPD-1

Match to Query 10843: 1784.880648 from(893.447600,2+)

Title: OECHL100310\_27.7173.7173.2.dta

Data file \\BOROMIR\Masse\Data LTQ-Orbitrap\Chrystelle Lacroix\Etude clinique sJPU\OECHL100310\_27.raw

**Monoisotopic mass of neutral peptide Mr(calc):** 1784.879211 **Fixed modifications:** Carbamidomethyl (C) (apply to specified residues or termini only) **Ions Score:** 58

**Expect:** 0.00027 **Matches :** 22/170 fragment ions using 46 most intense peaks ([help](#))

| # | b          | b <sup>++</sup> | b* | b <sup>*++</sup> | b <sup>0</sup>    | b <sup>0++</sup> | Seq.     | y                  | y <sup>++</sup>   | y*          | y <sup>*++</sup> | y <sup>0</sup> | y <sup>0++</sup> | #         |
|---|------------|-----------------|----|------------------|-------------------|------------------|----------|--------------------|-------------------|-------------|------------------|----------------|------------------|-----------|
| 1 | 164.070605 | 82.538940       |    |                  |                   |                  | <b>Y</b> |                    |                   |             |                  |                |                  | <b>17</b> |
| 2 | 251.102633 | 126.054954      |    |                  | 233.092068        | 117.049672       | <b>S</b> | 1622.823172        | 811.915224        | 1605.796623 | 803.401950       | 1604.812607    | 802.909941       | <b>16</b> |
| 3 | 308.124097 | 154.565687      |    |                  | 290.113532        | 145.560404       | <b>G</b> | 1535.791144        | <b>768.399210</b> | 1518.764595 | 759.885936       | 1517.780579    | 759.393928       | <b>15</b> |
| 4 | 395.156125 | 198.081701      |    |                  | 377.145560        | 189.076418       | <b>S</b> | 1478.769680        | <b>739.888478</b> | 1461.743131 | 731.375204       | 1460.759115    | 730.883195       | <b>14</b> |
| 5 | 524.198718 | 262.602997      |    |                  | <b>506.188153</b> | 253.597715       | <b>E</b> | <b>1391.737652</b> | 696.372464        | 1374.711103 | 687.859190       | 1373.727087    | 687.367182       | <b>13</b> |
| 6 | 581.220182 | 291.113729      |    |                  | 563.209617        | 282.108447       | <b>G</b> | <b>1262.695059</b> | <b>631.851167</b> | 1245.668510 | 623.337893       | 1244.684494    | 622.845885       | <b>12</b> |

|    |                    |            |             |            |                    |            |   |                    |            |                    |                   |             |                   |    |
|----|--------------------|------------|-------------|------------|--------------------|------------|---|--------------------|------------|--------------------|-------------------|-------------|-------------------|----|
| 7  | 668.252210         | 334.629743 |             |            | 650.241645         | 325.624461 | S | <b>1205.673595</b> | 603.340436 | 1188.647046        | 594.827161        | 1187.663030 | 594.335153        | 11 |
| 8  | 769.299889         | 385.153583 |             |            | 751.289324         | 376.148300 | T | <b>1118.641567</b> | 559.824421 | 1101.615018        | 551.311147        | 1100.631002 | 550.819139        | 10 |
| 9  | 897.358467         | 449.182872 | 880.331918  | 440.669597 | 879.347902         | 440.177589 | Q | <b>1017.593888</b> | 509.300582 | <b>1000.567339</b> | 500.787307        | 999.583323  | 500.295299        | 9  |
| 10 | 998.406146         | 499.706711 | 981.379597  | 491.193437 | <b>980.395581</b>  | 490.701429 | T | 889.535310         | 445.271293 | 872.508761         | <b>436.758018</b> | 871.524745  | <b>436.266010</b> | 8  |
| 11 | 1111.490210        | 556.248743 | 1094.463661 | 547.735469 | 1093.479645        | 547.243461 | L | <b>788.487631</b>  | 394.747453 | 771.461082         | 386.234179        | 770.477066  | 385.742171        | 7  |
| 12 | 1212.537889        | 606.772583 | 1195.511340 | 598.259308 | 1194.527324        | 597.767300 | T | <b>675.403567</b>  | 338.205421 | 658.377018         | 329.692147        | 657.393002  | 329.200139        | 6  |
| 13 | 1340.632852        | 670.820064 | 1323.606303 | 662.306790 | 1322.622287        | 661.814782 | K | <b>574.355888</b>  | 287.681582 | 557.329339         | 279.168307        | 556.345323  | 278.676299        | 5  |
| 14 | <b>1397.654316</b> | 699.330796 | 1380.627767 | 690.817522 | 1379.643751        | 690.325514 | G | <b>446.260925</b>  | 223.634100 | 429.234376         | 215.120826        | 428.250360  | 214.628818        | 4  |
| 15 | <b>1526.696909</b> | 763.852093 | 1509.670360 | 755.338818 | 1508.686344        | 754.846810 | E | 389.239461         | 195.123368 | 372.212912         | 186.610094        | 371.228896  | 186.118086        | 3  |
| 16 | <b>1639.780973</b> | 820.394124 | 1622.754424 | 811.880850 | <b>1621.770408</b> | 811.388842 | L | <b>260.196868</b>  | 130.602072 | 243.170319         | 122.088797        |             |                   | 2  |
| 17 |                    |            |             |            |                    |            | K | 147.112804         | 74.060040  | 130.086255         | 65.546765         |             |                   | 1  |

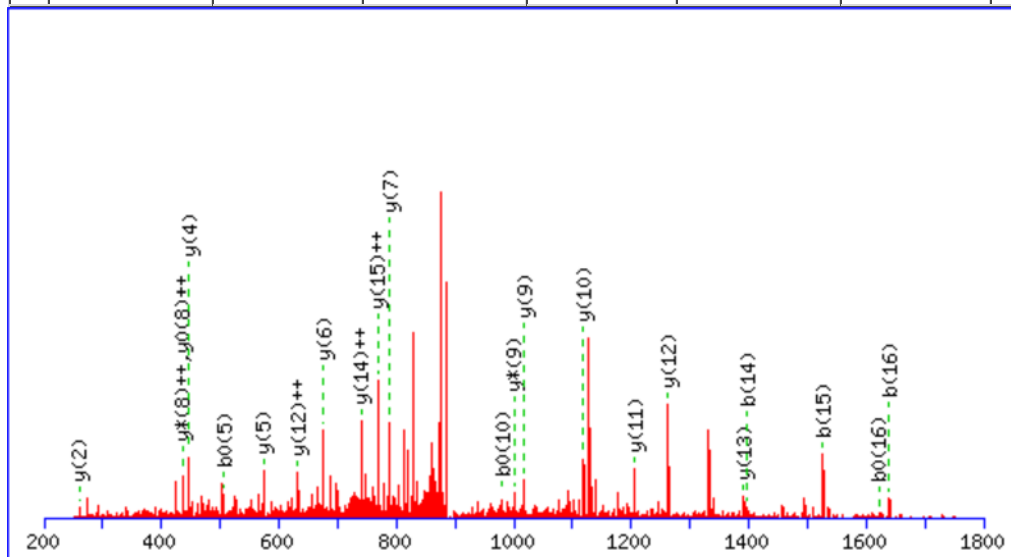

## Peptide View

MS/MS Fragmentation of **APRPAPGGAEQR**

Found in **IP100001952**, Tax\_Id=9606 Gene\_Symbol=ENDOD1 Endonuclease domain-containing 1 protein

Experiment: 40 - OPD-1 Fraction: OPD-1

Match to Query 5160: 1205.626572 from(402.882800,3+)

Title: OECHL100310\_27.1760.1760.3.dta

Data file \\BOROMIR\Masse\Data LTQ-Orbitrap\Chrystelle Lacroix\Etude clinique sJPU\OECHL100310\_27.raw

**Monoisotopic mass of neutral peptide Mr(calc):** 1205.626495**Fixed modifications:** Carbamidomethyl (C) (apply to specified residues or termini only)**Ions Score:** 54**Expect:** 0.0003**Matches :** 30/106 fragment ions using 52 most intense peaks ([help](#))

| #  | b           | b <sup>++</sup> | b*          | b <sup>*++</sup> | b <sup>0</sup> | b <sup>0++</sup> | Seq. | y           | y <sup>++</sup> | y*          | y <sup>*++</sup> | y <sup>0</sup> | y <sup>0++</sup> | #  |
|----|-------------|-----------------|-------------|------------------|----------------|------------------|------|-------------|-----------------|-------------|------------------|----------------|------------------|----|
| 1  | 72.044390   | 36.525833       |             |                  |                |                  | A    |             |                 |             |                  |                |                  | 12 |
| 2  | 169.097154  | 85.052215       |             |                  |                |                  | P    | 1135.596682 | 568.301979      | 1118.570133 | 559.788705       | 1117.586117    | 559.296697       | 11 |
| 3  | 325.198265  | 163.102770      | 308.171716  | 154.589496       |                |                  | R    | 1038.543918 | 519.775597      | 1021.517369 | 511.262323       | 1020.533353    | 510.770315       | 10 |
| 4  | 422.251029  | 211.629152      | 405.224480  | 203.115878       |                |                  | P    | 882.442807  | 441.725042      | 865.416258  | 433.211767       | 864.432242     | 432.719759       | 9  |
| 5  | 493.288143  | 247.147709      | 476.261594  | 238.634435       |                |                  | A    | 785.390043  | 393.198660      | 768.363494  | 384.685385       | 767.379478     | 384.193377       | 8  |
| 6  | 590.340907  | 295.674092      | 573.314358  | 287.160817       |                |                  | P    | 714.352929  | 357.680103      | 697.326380  | 349.166828       | 696.342364     | 348.674820       | 7  |
| 7  | 647.362371  | 324.184824      | 630.335822  | 315.671549       |                |                  | G    | 617.300165  | 309.153721      | 600.273616  | 300.640446       | 599.289600     | 300.148438       | 6  |
| 8  | 704.383835  | 352.695556      | 687.357286  | 344.182281       |                |                  | G    | 560.278701  | 280.642989      | 543.252152  | 272.129714       | 542.268136     | 271.637706       | 5  |
| 9  | 775.420949  | 388.214113      | 758.394400  | 379.700838       |                |                  | A    | 503.257237  | 252.132256      | 486.230688  | 243.618982       | 485.246672     | 243.126974       | 4  |
| 10 | 904.463542  | 452.735409      | 887.436993  | 444.222135       | 886.452977     | 443.730127       | E    | 432.220123  | 216.613699      | 415.193574  | 208.100425       | 414.209558     | 207.608417       | 3  |
| 11 | 1032.522120 | 516.764698      | 1015.495571 | 508.251424       | 1014.511555    | 507.759416       | Q    | 303.177530  | 152.092403      | 286.150981  | 143.579128       |                |                  | 2  |
| 12 |             |                 |             |                  |                |                  | R    | 175.118952  | 88.063114       | 158.092403  | 79.549839        |                |                  | 1  |

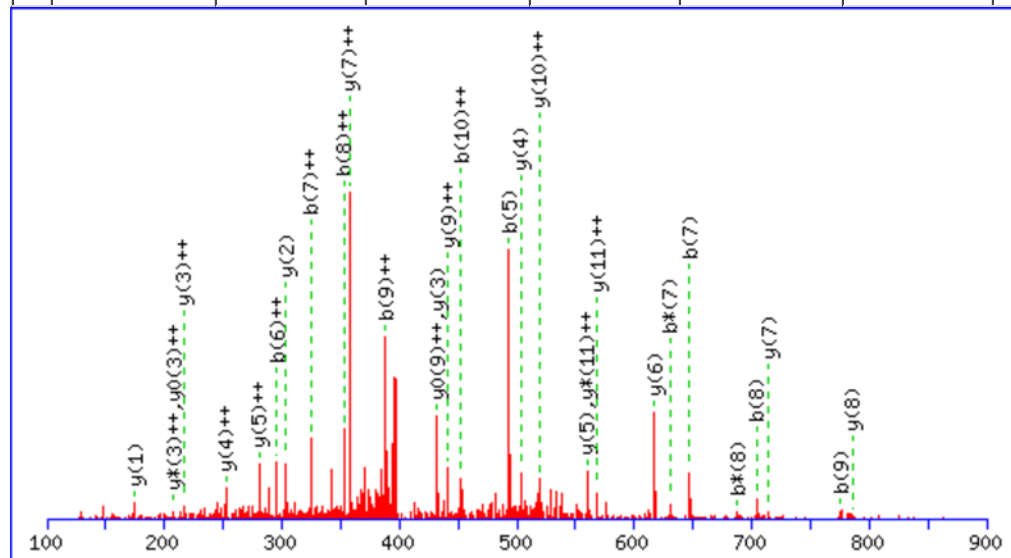

## Peptide View

MS/MS Fragmentation of **NPVLQQDAHSSVTITPQR**

Found in **IPI00410488**, Tax\_Id=9606 Gene\_Symbol=CD276 Isoform 1 of CD276 antigen

Experiment: 07 - S\_C-1 Fraction: S\_C-1

Match to Query 13185: 1990.024448 from(996.019500,2+)

Title: OECHL100310\_25.9483.9483.2.dta

Data file \\BOROMIR\Masse\Data LTQ-Orbitrap\Chrystelle Lacroix\Etude clinique sJPU\OECHL100310\_25.raw

**Monoisotopic mass of neutral peptide Mr(calc):** 1990.023209**Fixed modifications:** Carbamidomethyl (C) (apply to specified residues or termini only)**Ions Score:** 98

**Expect:** 2.3e-008**Matches :** 55/186 fragment ions using 80 most intense peaks ([help](#))

| #  | b                  | b <sup>++</sup>   | b*                 | b <sup>*++</sup>  | b <sup>0</sup>     | b <sup>0++</sup>  | Seq. | y                  | y <sup>++</sup>   | y*                 | y <sup>*++</sup>  | y <sup>0</sup>     | y <sup>0++</sup>  | #  |
|----|--------------------|-------------------|--------------------|-------------------|--------------------|-------------------|------|--------------------|-------------------|--------------------|-------------------|--------------------|-------------------|----|
| 1  | 115.050203         | 58.028740         | 98.023654          | 49.515465         |                    |                   | N    |                    |                   |                    |                   |                    |                   | 18 |
| 2  | 212.102967         | 106.555121        | 195.076418         | 98.041847         |                    |                   | P    | 1876.987553        | 938.997415        | 1859.961004        | 930.484140        | 1858.976988        | 929.992132        | 17 |
| 3  | <b>311.171381</b>  | 156.089328        | <b>294.144832</b>  | 147.576054        |                    |                   | V    | <b>1779.934789</b> | <b>890.471033</b> | 1762.908240        | 881.957758        | 1761.924224        | 881.465750        | 16 |
| 4  | <b>424.255445</b>  | 212.631361        | <b>407.228896</b>  | 204.118086        |                    |                   | L    | <b>1680.866375</b> | <b>840.936826</b> | <b>1663.839826</b> | 832.423551        | 1662.855810        | 831.931543        | 15 |
| 5  | <b>552.314023</b>  | 276.660650        | <b>535.287474</b>  | 268.147375        |                    |                   | Q    | <b>1567.782311</b> | <b>784.394794</b> | 1550.755762        | <b>775.881519</b> | 1549.771746        | <b>775.389511</b> | 14 |
| 6  | <b>680.372601</b>  | <b>340.689939</b> | <b>663.346052</b>  | 332.176664        |                    |                   | Q    | <b>1439.723733</b> | 720.365505        | <b>1422.697184</b> | 711.852230        | 1421.713168        | 711.360222        | 13 |
| 7  | <b>795.399544</b>  | 398.203410        | 778.372995         | 389.690136        | 777.388979         | 389.198128        | D    | <b>1311.665155</b> | 656.336215        | 1294.638606        | 647.822941        | 1293.654590        | 647.330933        | 12 |
| 8  | 866.436658         | 433.721967        | 849.410109         | 425.208693        | 848.426093         | <b>424.716685</b> | A    | <b>1196.638212</b> | 598.822744        | 1179.611663        | 590.309470        | <b>1178.627647</b> | 589.817462        | 11 |
| 9  | <b>1003.495570</b> | <b>502.251423</b> | 986.469021         | 493.738149        | 985.485005         | 493.246141        | H    | <b>1125.601098</b> | 563.304187        | 1108.574549        | 554.790913        | 1107.590533        | 554.298905        | 10 |
| 10 | <b>1090.527598</b> | 545.767437        | <b>1073.501049</b> | 537.254163        | 1072.517033        | 536.762155        | S    | <b>988.542186</b>  | 494.774731        | 971.515637         | 486.261457        | 970.531621         | <b>485.769449</b> | 9  |
| 11 | <b>1177.559626</b> | 589.283451        | 1160.533077        | 580.770177        | 1159.549061        | 580.278169        | S    | <b>901.510158</b>  | 451.258717        | 884.483609         | 442.745443        | 883.499593         | 442.253435        | 8  |
| 12 | <b>1276.628040</b> | 638.817658        | <b>1259.601491</b> | 630.304384        | <b>1258.617475</b> | 629.812376        | V    | <b>814.478130</b>  | <b>407.742703</b> | 797.451581         | 399.229428        | 796.467565         | 398.737420        | 7  |
| 13 | <b>1377.675719</b> | 689.341498        | 1360.649170        | <b>680.828223</b> | <b>1359.665154</b> | <b>680.336215</b> | T    | <b>715.409716</b>  | 358.208496        | 698.383167         | 349.695221        | 697.399151         | 349.203213        | 6  |
| 14 | <b>1490.759783</b> | 745.883530        | <b>1473.733234</b> | 737.370255        | <b>1472.749218</b> | 736.878247        | I    | <b>614.362037</b>  | 307.684656        | 597.335488         | 299.171382        | 596.351472         | 298.679374        | 5  |
| 15 | <b>1591.807462</b> | 796.407369        | 1574.780913        | 787.894095        | <b>1573.796897</b> | 787.402087        | T    | <b>501.277973</b>  | 251.142624        | 484.251424         | 242.629350        | 483.267408         | 242.137342        | 4  |
| 16 | 1688.860226        | 844.933751        | 1671.833677        | 836.420477        | 1670.849661        | 835.928469        | P    | <b>400.230294</b>  | 200.618785        | 383.203745         | 192.105510        |                    |                   | 3  |
| 17 | <b>1816.918804</b> | 908.963040        | <b>1799.892255</b> | 900.449766        | 1798.908239        | 899.957758        | Q    | 303.177530         | 152.092403        | 286.150981         | 143.579128        |                    |                   | 2  |
| 18 |                    |                   |                    |                   |                    |                   | R    | 175.118952         | 88.063114         | 158.092403         | 79.549839         |                    |                   | 1  |

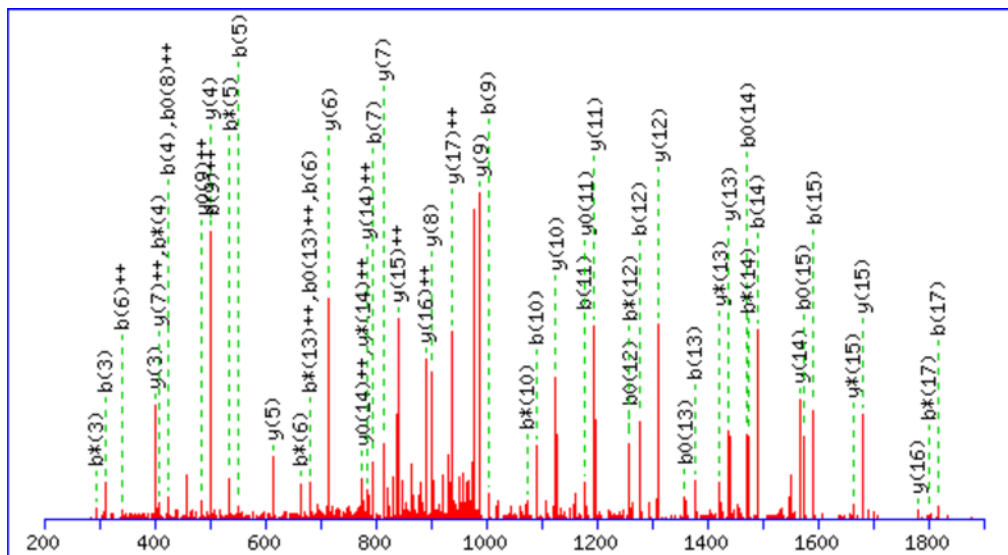

## Peptide View

MS/MS Fragmentation of **TVAGPVGGSLSVQCPYEKEHR**

Found in **IPI00414784**, Tax\_Id=9606 Gene\_Symbol=CD300A Isoform 1 of CMRF35-like molecule 8

**Experiment:** 07 - S\_C-1 **Fraction:** S\_C-1

Match to Query 14358: 2270.113448 from(1136.064000,2+)

Title: OECHL100310\_25.10250.10250.2.dta

Data file \\BOROMIR\Masse\Data LTQ-Orbitrap\Chrystelle Lacroix\Etude clinique sJPU\OECHL100310\_25.raw

**Monoisotopic mass of neutral peptide Mr(calc):** 2270.111374 **Fixed modifications:** Carbamidomethyl (C) (apply to specified residues or termini only) **Ions Score:** 82

**Expect:** 1.2e-006 **Matches :** 38/212 fragment ions using 68 most intense peaks ([help](#))

| # | b          | b <sup>++</sup> | b <sup>*</sup> | b <sup>*++</sup> | b <sup>0</sup> | b <sup>0++</sup> | Seq. | y           | y <sup>++</sup> | y <sup>*</sup> | y <sup>*++</sup> | y <sup>0</sup> | y <sup>0++</sup> |
|---|------------|-----------------|----------------|------------------|----------------|------------------|------|-------------|-----------------|----------------|------------------|----------------|------------------|
| 1 | 102.054955 | 51.531116       |                |                  | 84.044390      | 42.525833        | T    |             |                 |                |                  |                |                  |
| 2 | 201.123369 | 101.065322      |                |                  | 183.112804     | 92.060040        | V    | 2170.070965 | 1085.539120     | 2153.044416    | 1077.025846      | 2152.060400    | 1076.5338        |
| 3 | 272.160483 | 136.583879      |                |                  | 254.149918     | 127.578597       | A    | 2071.002551 | 1036.004913     | 2053.976002    | 1027.491639      | 2052.991986    | 1026.9996        |
| 4 | 329.181947 | 165.094611      |                |                  | 311.171382     | 156.089329       | G    | 1999.965437 | 1000.486357     | 1982.938888    | 991.973082       | 1981.954872    | 991.4810         |
| 5 | 426.234711 | 213.620994      |                |                  | 408.224146     | 204.615711       | P    | 1942.943973 | 971.975625      | 1925.917424    | 963.462350       | 1924.933408    | 962.9703         |
| 6 | 525.303125 | 263.155201      |                |                  | 507.292560     | 254.149918       | V    | 1845.891209 | 923.449243      | 1828.864660    | 914.935968       | 1827.880644    | 914.4439         |

|    |             |             |             |             |             |             |   |             |            |             |            |             |          |
|----|-------------|-------------|-------------|-------------|-------------|-------------|---|-------------|------------|-------------|------------|-------------|----------|
| 7  | 582.324589  | 291.665933  |             |             | 564.314024  | 282.660650  | G | 1746.822795 | 873.915036 | 1729.796246 | 865.401761 | 1728.812230 | 864.9097 |
| 8  | 639.346053  | 320.176665  |             |             | 621.335488  | 311.171382  | G | 1689.801331 | 845.404304 | 1672.774782 | 836.891029 | 1671.790766 | 836.3990 |
| 9  | 726.378081  | 363.692679  |             |             | 708.367516  | 354.687396  | S | 1632.779867 | 816.893572 | 1615.753318 | 808.380297 | 1614.769302 | 807.8882 |
| 10 | 839.462145  | 420.234711  |             |             | 821.451580  | 411.229428  | L | 1545.747839 | 773.377558 | 1528.721290 | 764.864283 | 1527.737274 | 764.3722 |
| 11 | 926.494173  | 463.750725  |             |             | 908.483608  | 454.745442  | S | 1432.663775 | 716.835526 | 1415.637226 | 708.322251 | 1414.653210 | 707.8302 |
| 12 | 1025.562587 | 513.284932  |             |             | 1007.552022 | 504.279649  | V | 1345.631747 | 673.319512 | 1328.605198 | 664.806237 | 1327.621182 | 664.3142 |
| 13 | 1153.621165 | 577.314221  | 1136.594616 | 568.800946  | 1135.610600 | 568.308938  | Q | 1246.563333 | 623.785305 | 1229.536784 | 615.272030 | 1228.552768 | 614.7800 |
| 14 | 1313.651814 | 657.329545  | 1296.625265 | 648.816271  | 1295.641249 | 648.324263  | C | 1118.504755 | 559.756016 | 1101.478206 | 551.242741 | 1100.494190 | 550.7507 |
| 15 | 1410.704578 | 705.855927  | 1393.678029 | 697.342653  | 1392.694013 | 696.850645  | P | 958.474106  | 479.740691 | 941.447557  | 471.227417 | 940.463541  | 470.7354 |
| 16 | 1573.767907 | 787.387592  | 1556.741358 | 778.874317  | 1555.757342 | 778.382309  | Y | 861.421342  | 431.214309 | 844.394793  | 422.701035 | 843.410777  | 422.2090 |
| 17 | 1702.810500 | 851.908888  | 1685.783951 | 843.395614  | 1684.799935 | 842.903606  | E | 698.358013  | 349.682645 | 681.331464  | 341.169370 | 680.347448  | 340.6773 |
| 18 | 1830.905463 | 915.956370  | 1813.878914 | 907.443095  | 1812.894898 | 906.951087  | K | 569.315420  | 285.161348 | 552.288871  | 276.648074 | 551.304855  | 276.1560 |
| 19 | 1959.948056 | 980.477666  | 1942.921507 | 971.964392  | 1941.937491 | 971.472384  | E | 441.220457  | 221.113867 | 424.193908  | 212.600592 | 423.209892  | 212.1085 |
| 20 | 2097.006968 | 1049.007122 | 2079.980419 | 1040.493847 | 2078.996403 | 1040.001840 | H | 312.177864  | 156.592570 | 295.151315  | 148.079295 |             |          |
| 21 |             |             |             |             |             |             | R | 175.118952  | 88.063114  | 158.092403  | 79.549839  |             |          |

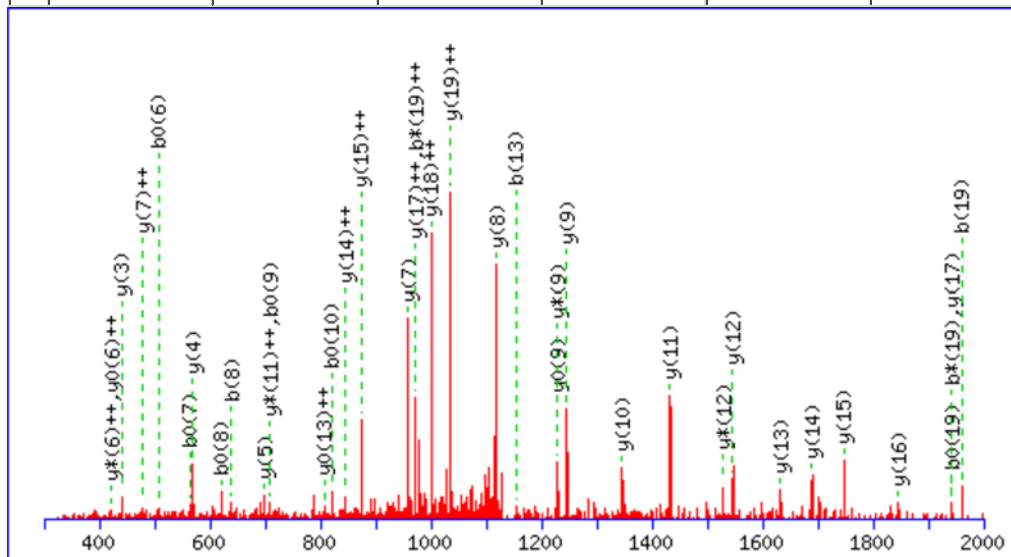

## Peptide View



MS/MS Fragmentation of **SFCDLTDEWR**Found in **IPI00010193**, Tax\_Id=9606 Gene\_Symbol=IFNAR2 Isoform 1 of Interferon-alpha/beta receptor beta chain**Experiment:** 07 - S\_C-1 **Fraction:** S\_C-1

Match to Query 7774: 1327.549248 from(664.781900,2+)

Title: OECHL100310\_25.16064.16064.2.dta

Data file \\BOROMIR\Masse\Data LTQ-Orbitrap\Chrystelle Lacroix\Etude clinique sJPU\OECHL100310\_25.raw

**Monoisotopic mass of neutral peptide Mr(calc):** 1327.550308 **Fixed modifications:** Carbamidomethyl (C) (apply to specified residues or termini only) **Ions Score:** 49**Expect:** 0.00026 **Matches :** 22/86 fragment ions using 36 most intense peaks ([help](#))

| #  | b                  | b <sup>++</sup>   | b <sup>0</sup>    | b <sup>0++</sup> | Seq. | y                  | y <sup>++</sup>   | y*                 | y <sup>*++</sup>  | y <sup>0</sup>     | y <sup>0++</sup>  | #  |
|----|--------------------|-------------------|-------------------|------------------|------|--------------------|-------------------|--------------------|-------------------|--------------------|-------------------|----|
| 1  | 88.039304          | 44.523290         | 70.028739         | 35.518008        | S    |                    |                   |                    |                   |                    |                   | 10 |
| 2  | <b>235.107718</b>  | 118.057497        | 217.097153        | 109.052214       | F    | <b>1241.525550</b> | 621.266413        | 1224.499001        | 612.753138        | 1223.514985        | 612.261130        | 9  |
| 3  | <b>395.138367</b>  | 198.072821        | 377.127802        | 189.067539       | C    | <b>1094.457136</b> | <b>547.732206</b> | <b>1077.430587</b> | <b>539.218932</b> | <b>1076.446571</b> | <b>538.726924</b> | 8  |
| 4  | 510.165310         | 255.586293        | 492.154745        | 246.581010       | D    | <b>934.426487</b>  | 467.716882        | 917.399938         | 459.203607        | 916.415922         | 458.711599        | 7  |
| 5  | 623.249374         | 312.128325        | <b>605.238809</b> | 303.123043       | L    | <b>819.399544</b>  | 410.203410        | 802.372995         | 401.690135        | 801.388979         | 401.198127        | 6  |
| 6  | <b>724.297053</b>  | <b>362.652165</b> | <b>706.286488</b> | 353.646882       | T    | <b>706.315480</b>  | 353.661378        | 689.288931         | 345.148103        | 688.304915         | 344.656095        | 5  |
| 7  | <b>839.323996</b>  | 420.165636        | 821.313431        | 411.160353       | D    | <b>605.267801</b>  | 303.137539        | 588.241252         | 294.624264        | 587.257236         | 294.132256        | 4  |
| 8  | <b>968.366589</b>  | 484.686933        | 950.356024        | 475.681650       | E    | <b>490.240858</b>  | 245.624067        | 473.214309         | 237.110792        | 472.230293         | 236.618784        | 3  |
| 9  | <b>1154.445902</b> | 577.726589        | 1136.435337       | 568.721306       | W    | <b>361.198265</b>  | 181.102770        | 344.171716         | 172.589496        |                    |                   | 2  |
| 10 |                    |                   |                   |                  | R    | 175.118952         | 88.063114         | 158.092403         | 79.549839         |                    |                   | 1  |

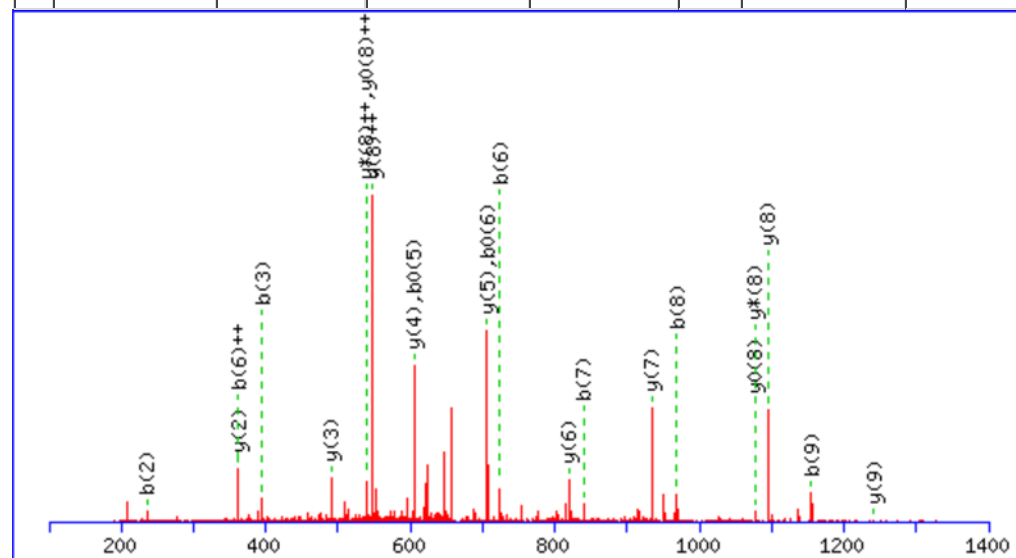

## Peptide View

MS/MS Fragmentation of **LLETECPQYIR**

Found in **IP100007047**, Tax\_Id=9606 Gene\_Symbol=S100A8 Protein S100-A8

Experiment: 07 - S\_C-1 Fraction: S\_C-1

Match to Query 8683: 1420.703848 from(711.359200,2+)

Title: OECHL100310\_25.11775.11775.2.dta

Data file \\BOROMIR\Masse\Data LTQ-Orbitrap\Chrystelle Lacroix\Etude clinique sJPU\OECHL100310\_25.raw

**Monoisotopic mass of neutral peptide Mr(calc):** 1420.702026 **Fixed modifications:** Carbamidomethyl (C) (apply to specified residues or termini only) **Ions Score:** 66

**Expect:** 3.2e-005 **Matches :** 11/90 fragment ions using 12 most intense peaks ([help](#))

| #  | b                  | b <sup>++</sup> | b*          | b* <sup>++</sup> | b <sup>0</sup> | b <sup>0++</sup> | Seq. | y                  | y <sup>++</sup>   | y*          | y* <sup>++</sup> | y <sup>0</sup> | y <sup>0++</sup> | #  |
|----|--------------------|-----------------|-------------|------------------|----------------|------------------|------|--------------------|-------------------|-------------|------------------|----------------|------------------|----|
| 1  | 114.091340         | 57.549308       |             |                  |                |                  | L    |                    |                   |             |                  |                |                  | 11 |
| 2  | 227.175404         | 114.091340      |             |                  |                |                  | L    | <b>1308.625265</b> | 654.816271        | 1291.598716 | 646.302996       | 1290.614700    | 645.810988       | 10 |
| 3  | <b>356.217997</b>  | 178.612637      |             |                  | 338.207432     | 169.607354       | E    | <b>1195.541201</b> | <b>598.274239</b> | 1178.514652 | 589.760964       | 1177.530636    | 589.268956       | 9  |
| 4  | 457.265676         | 229.136476      |             |                  | 439.255111     | 220.131194       | T    | <b>1066.498608</b> | 533.752942        | 1049.472059 | 525.239668       | 1048.488043    | 524.747660       | 8  |
| 5  | 586.308269         | 293.657773      |             |                  | 568.297704     | 284.652490       | E    | <b>965.450929</b>  | 483.229103        | 948.424380  | 474.715828       | 947.440364     | 474.223820       | 7  |
| 6  | <b>746.338918</b>  | 373.673097      |             |                  | 728.328353     | 364.667815       | C    | <b>836.408336</b>  | 418.707806        | 819.381787  | 410.194531       |                |                  | 6  |
| 7  | 843.391682         | 422.199479      |             |                  | 825.381117     | 413.194197       | P    | 676.377687         | 338.692481        | 659.351138  | 330.179207       |                |                  | 5  |
| 8  | 971.450260         | 486.228768      | 954.423711  | 477.715494       | 953.439695     | 477.223486       | Q    | 579.324923         | 290.166099        | 562.298374  | 281.652825       |                |                  | 4  |
| 9  | 1134.513589        | 567.760433      | 1117.487040 | 559.247158       | 1116.503024    | 558.755150       | Y    | <b>451.266345</b>  | 226.136810        | 434.239796  | 217.623536       |                |                  | 3  |
| 10 | <b>1247.597653</b> | 624.302465      | 1230.571104 | 615.789190       | 1229.587088    | 615.297182       | I    | <b>288.203016</b>  | 144.605146        | 271.176467  | 136.091871       |                |                  | 2  |
| 11 |                    |                 |             |                  |                |                  | R    | 175.118952         | 88.063114         | 158.092403  | 79.549839        |                |                  | 1  |

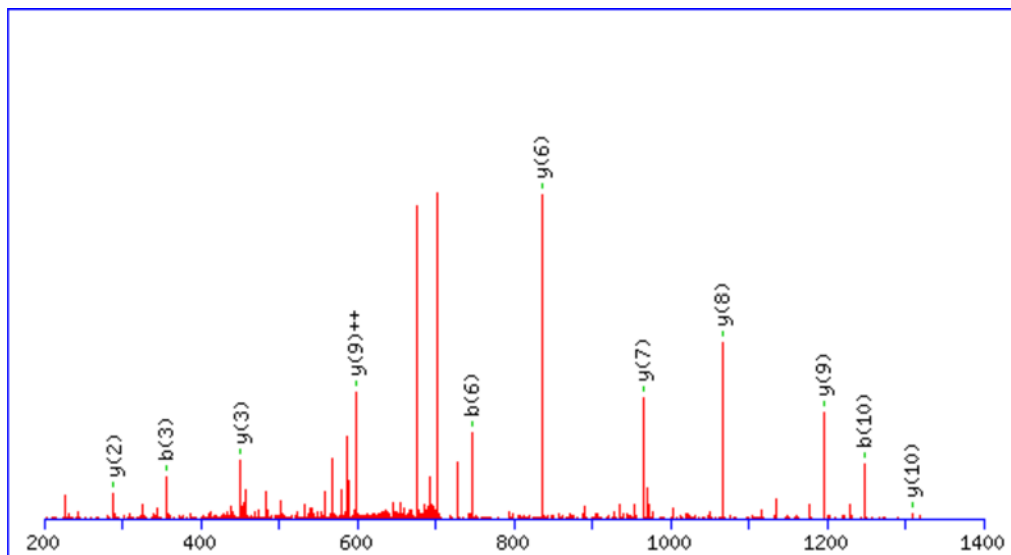

## Peptide View

MS/MS Fragmentation of **GLAEAAGPR**

Found in **IPI00290826**, Tax\_Id=9606 Gene\_Symbol=FAM174A Membrane protein FAM174A

**Experiment:** 07 - S\_C-1 **Fraction:** S\_C-1

Match to Query 1124: 840.445048 from(421.229800,2+)

Title: OECHL100310\_25.3877.3877.2.dta

Data file \\BOROMIR\Masse\Data LTQ-Orbitrap\Chrystelle Lacroix\Etude clinique sJPU\OECHL100310\_25.raw

**Monoisotopic mass of neutral peptide Mr(calc):** 840.445343 **Fixed modifications:** Carbamidomethyl (C) (apply to specified residues or termini only) **Ions Score:** 58

**Expect:** 8.1e-005 **Matches :** 13/64 fragment ions using 21 most intense peaks ([help](#))

| # | b                 | b <sup>++</sup> | b <sup>0</sup> | b <sup>0++</sup> | Seq. | y                 | y <sup>++</sup> | y*         | y <sup>*++</sup> | y <sup>0</sup> | y <sup>0++</sup> | # |
|---|-------------------|-----------------|----------------|------------------|------|-------------------|-----------------|------------|------------------|----------------|------------------|---|
| 1 | 58.028740         | 29.518008       |                |                  | G    |                   |                 |            |                  |                |                  | 9 |
| 2 | <b>171.112804</b> | 86.060040       |                |                  | L    | 784.431179        | 392.719228      | 767.404630 | 384.205953       | 766.420614     | 383.713945       | 8 |
| 3 | <b>242.149918</b> | 121.578597      |                |                  | A    | <b>671.347115</b> | 336.177196      | 654.320566 | 327.663921       | 653.336550     | 327.171913       | 7 |
| 4 | 371.192511        | 186.099894      | 353.181946     | 177.094611       | E    | <b>600.310001</b> | 300.658639      | 583.283452 | 292.145364       | 582.299436     | 291.653356       | 6 |
| 5 | <b>442.229625</b> | 221.618450      | 424.219060     | 212.613168       | A    | <b>471.267408</b> | 236.137342      | 454.240859 | 227.624067       |                |                  | 5 |
| 6 | <b>513.266739</b> | 257.137008      | 495.256174     | 248.131725       | A    | <b>400.230294</b> | 200.618785      | 383.203745 | 192.105510       |                |                  | 4 |

|   |                   |            |                   |            |          |                   |            |            |            |  |  |          |
|---|-------------------|------------|-------------------|------------|----------|-------------------|------------|------------|------------|--|--|----------|
| 7 | <b>570.288203</b> | 285.647740 | <b>552.277638</b> | 276.642457 | <b>G</b> | <b>329.193180</b> | 165.100228 | 312.166631 | 156.586953 |  |  | <b>3</b> |
| 8 | 667.340967        | 334.174122 | 649.330402        | 325.168839 | <b>P</b> | <b>272.171716</b> | 136.589496 | 255.145167 | 128.076221 |  |  | <b>2</b> |
| 9 |                   |            |                   |            | <b>R</b> | <b>175.118952</b> | 88.063114  | 158.092403 | 79.549839  |  |  | <b>1</b> |

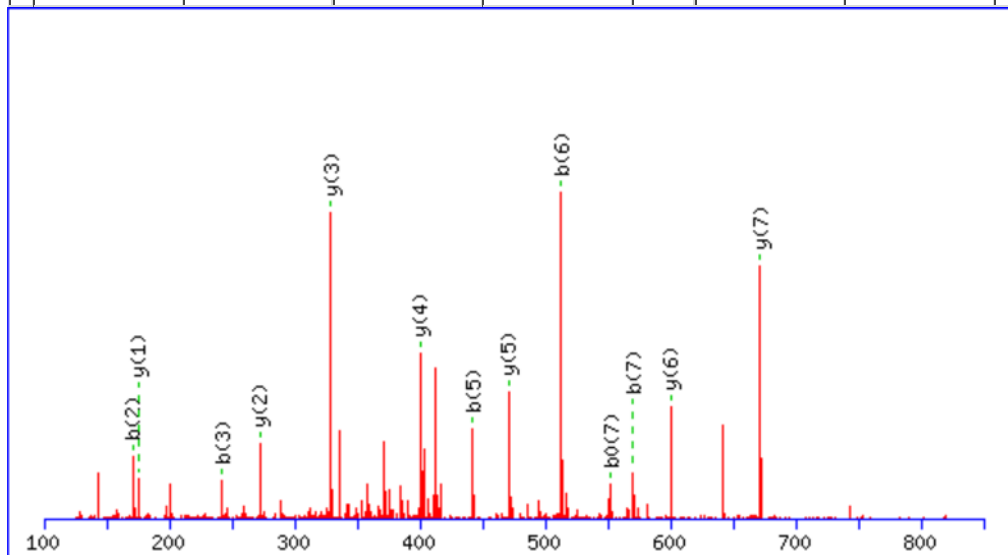

## Peptide View

MS/MS Fragmentation of **GLDTSLGAVQSDTGR**

Found in **IP100289931**, Tax\_Id=9606 Gene\_Symbol=MADCAM1 MADCAM1 protein

**Experiment:** 07 - S\_C-1 **Fraction:** S\_C-1

Match to Query 9338: 1475.722048 from(738.868300,2+)

Title: OECHL100310\_25.10938.10938.2.dta

Data file \\BOROMIR\Masse\Data LTQ-Orbitrap\Chrystelle Lacroix\Etude clinique sJPU\OECHL100310\_25.raw

**Monoisotopic mass of neutral peptide Mr(calc):** 1475.721619 **Fixed modifications:** Carbamidomethyl (C) (apply to specified residues or termini only) **Ions Score:** 79

**Expect:** 1.9e-006 **Matches :** 29/142 fragment ions using 48 most intense peaks ([help](#))

| #        | b          | b <sup>++</sup> | b* | b <sup>*++</sup> | b <sup>0</sup> | b <sup>0++</sup> | Seq.     | y           | y <sup>++</sup> | y*          | y <sup>*++</sup> | y <sup>0</sup> | y <sup>0++</sup>  | #         |
|----------|------------|-----------------|----|------------------|----------------|------------------|----------|-------------|-----------------|-------------|------------------|----------------|-------------------|-----------|
| <b>1</b> | 58.028740  | 29.518008       |    |                  |                |                  | <b>G</b> |             |                 |             |                  |                |                   | <b>15</b> |
| <b>2</b> | 171.112804 | 86.060040       |    |                  |                |                  | <b>L</b> | 1419.707414 | 710.357345      | 1402.680865 | 701.844071       | 1401.696849    | 701.352063        | <b>14</b> |
| <b>3</b> | 286.139747 | 143.573512      |    |                  | 268.129182     | 134.568229       | <b>D</b> | 1306.623350 | 653.815313      | 1289.596801 | 645.302039       | 1288.612785    | <b>644.810031</b> | <b>13</b> |

|    |                    |            |             |            |                    |            |          |                    |            |             |            |             |                   |           |
|----|--------------------|------------|-------------|------------|--------------------|------------|----------|--------------------|------------|-------------|------------|-------------|-------------------|-----------|
| 4  | <b>387.187426</b>  | 194.097351 |             |            | 369.176861         | 185.092069 | <b>T</b> | <b>1191.596407</b> | 596.301842 | 1174.569858 | 587.788567 | 1173.585842 | <b>587.296559</b> | <b>12</b> |
| 5  | <b>474.219454</b>  | 237.613365 |             |            | <b>456.208889</b>  | 228.608082 | <b>S</b> | <b>1090.548728</b> | 545.778002 | 1073.522179 | 537.264728 | 1072.538163 | 536.772719        | <b>11</b> |
| 6  | <b>587.303518</b>  | 294.155397 |             |            | <b>569.292953</b>  | 285.150115 | <b>L</b> | <b>1003.516700</b> | 502.261988 | 986.490151  | 493.748714 | 985.506135  | 493.256706        | <b>10</b> |
| 7  | <b>644.324982</b>  | 322.666129 |             |            | 626.314417         | 313.660847 | <b>G</b> | <b>890.432636</b>  | 445.719956 | 873.406087  | 437.206682 | 872.422071  | 436.714674        | <b>9</b>  |
| 8  | <b>715.362096</b>  | 358.184686 |             |            | <b>697.351531</b>  | 349.179404 | <b>A</b> | <b>833.411172</b>  | 417.209224 | 816.384623  | 408.695950 | 815.400607  | 408.203942        | <b>8</b>  |
| 9  | <b>814.430510</b>  | 407.718893 |             |            | 796.419945         | 398.713611 | <b>V</b> | <b>762.374058</b>  | 381.690667 | 745.347509  | 373.177393 | 744.363493  | 372.685385        | <b>7</b>  |
| 10 | <b>942.489088</b>  | 471.748182 | 925.462539  | 463.234908 | 924.478523         | 462.742900 | <b>Q</b> | <b>663.305644</b>  | 332.156460 | 646.279095  | 323.643186 | 645.295079  | 323.151178        | <b>6</b>  |
| 11 | <b>1029.521116</b> | 515.264196 | 1012.494567 | 506.750922 | 1011.510551        | 506.258914 | <b>S</b> | <b>535.247066</b>  | 268.127171 | 518.220517  | 259.613897 | 517.236501  | 259.121889        | <b>5</b>  |
| 12 | <b>1144.548059</b> | 572.777668 | 1127.521510 | 564.264393 | <b>1126.537494</b> | 563.772385 | <b>D</b> | <b>448.215038</b>  | 224.611157 | 431.188489  | 216.097882 | 430.204473  | 215.605874        | <b>4</b>  |
| 13 | <b>1245.595738</b> | 623.301507 | 1228.569189 | 614.788233 | <b>1227.585173</b> | 614.296225 | <b>T</b> | <b>333.188095</b>  | 167.097685 | 316.161546  | 158.584411 | 315.177530  | 158.092403        | <b>3</b>  |
| 14 | <b>1302.617202</b> | 651.812239 | 1285.590653 | 643.298965 | 1284.606637        | 642.806957 | <b>G</b> | <b>232.140416</b>  | 116.573846 | 215.113867  | 108.060571 |             |                   | <b>2</b>  |
| 15 |                    |            |             |            |                    |            | <b>R</b> | 175.118952         | 88.063114  | 158.092403  | 79.549839  |             |                   | <b>1</b>  |

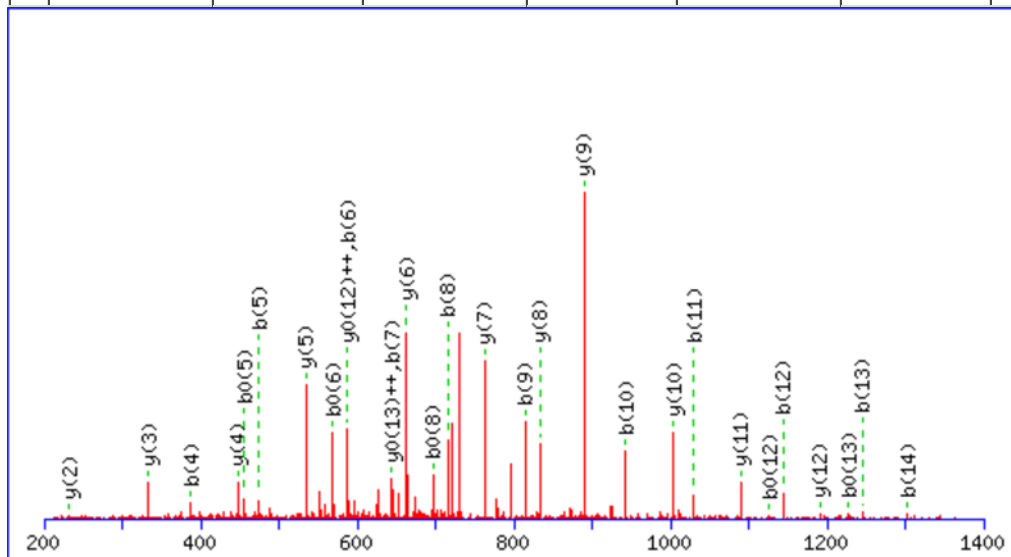

## Peptide View

MS/MS Fragmentation of **AFSMDEHNAALR**

Found in **IP100008239**, Tax\_Id=9606 Gene\_Symbol=GPRC5B cDNA FLJ55176, highly similar to G-protein coupled receptor family C group 5 member B

Experiment: 07 - S\_C-1 Fraction: S\_C-1

Match to Query 8116: 1360.620248 from(681.317400,2+)

Title: OECHL100310\_25.9338.9338.2.dta

Data file \\BOROMIR\Masse\Data LTQ-Orbitrap\Chrystelle Lacroix\Etude clinique sJPU\OECHL100310\_25.raw

**Monoisotopic mass of neutral peptide Mr(calc):** 1360.619354**Fixed modifications:** Carbamidomethyl (C) (apply to specified residues or termini only)**Ions Score:** 50**Expect:** 0.00082**Matches :** 23/102 fragment ions using 35 most intense peaks ([help](#))

| #  | b                  | b <sup>++</sup>   | b*                | b <sup>+++</sup>  | b <sup>0</sup>     | b <sup>0++</sup>  | Seq. | y                  | y <sup>++</sup>   | y*          | y <sup>+++</sup> | y <sup>0</sup> | y <sup>0++</sup> | #  |
|----|--------------------|-------------------|-------------------|-------------------|--------------------|-------------------|------|--------------------|-------------------|-------------|------------------|----------------|------------------|----|
| 1  | 72.044390          | 36.525833         |                   |                   |                    |                   | A    |                    |                   |             |                  |                |                  | 12 |
| 2  | <b>219.112804</b>  | 110.060040        |                   |                   |                    |                   | F    | 1290.589546        | 645.798411        | 1273.562997 | 637.285137       | 1272.578981    | 636.793128       | 11 |
| 3  | <b>306.144832</b>  | 153.576054        |                   |                   | 288.134267         | 144.570772        | S    | <b>1143.521132</b> | <b>572.264204</b> | 1126.494583 | 563.750929       | 1125.510567    | 563.258921       | 10 |
| 4  | 437.185317         | <b>219.096296</b> |                   |                   | 419.174752         | 210.091014        | M    | <b>1056.489104</b> | <b>528.748190</b> | 1039.462555 | 520.234916       | 1038.478539    | 519.742908       | 9  |
| 5  | 552.212260         | <b>276.609768</b> |                   |                   | 534.201695         | 267.604486        | D    | <b>925.448619</b>  | 463.227947        | 908.422070  | 454.714673       | 907.438054     | 454.222665       | 8  |
| 6  | 681.254853         | 341.131065        |                   |                   | <b>663.244288</b>  | 332.125782        | E    | <b>810.421676</b>  | 405.714476        | 793.395127  | 397.201201       | 792.411111     | 396.709193       | 7  |
| 7  | 818.313765         | 409.660521        |                   |                   | 800.303200         | 400.655238        | H    | 681.379083         | 341.193179        | 664.352534  | 332.679905       |                |                  | 6  |
| 8  | 932.356692         | 466.681984        | 915.330143        | 458.168709        | 914.346127         | 457.676701        | N    | <b>544.320171</b>  | 272.663724        | 527.293622  | 264.150449       |                |                  | 5  |
| 9  | <b>1003.393806</b> | 502.200541        | <b>986.367257</b> | 493.687266        | 985.383241         | 493.195258        | A    | <b>430.277244</b>  | 215.642260        | 413.250695  | 207.128985       |                |                  | 4  |
| 10 | <b>1074.430920</b> | 537.719098        | 1057.404371       | <b>529.205824</b> | <b>1056.420355</b> | <b>528.713816</b> | A    | <b>359.240130</b>  | 180.123703        | 342.213581  | 171.610428       |                |                  | 3  |
| 11 | <b>1187.514984</b> | 594.261130        | 1170.488435       | 585.747856        | 1169.504419        | 585.255847        | L    | <b>288.203016</b>  | 144.605146        | 271.176467  | 136.091871       |                |                  | 2  |
| 12 |                    |                   |                   |                   |                    |                   | R    | 175.118952         | 88.063114         | 158.092403  | 79.549839        |                |                  | 1  |

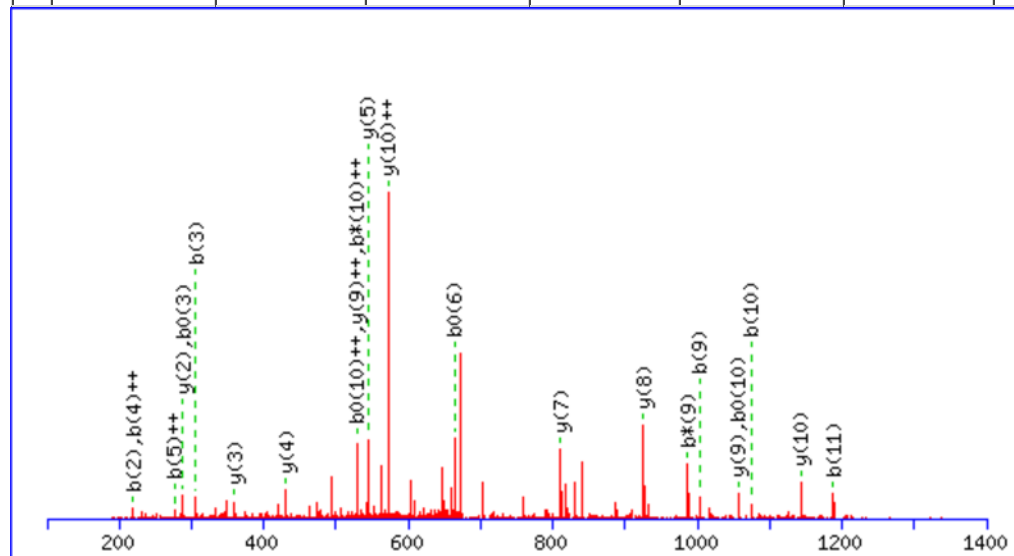

## Peptide View

MS/MS Fragmentation of **SCVACGNDIALIK**

Found in **IP100295663**, Tax\_Id=9606 Gene\_Symbol=CELA3A Chymotrypsin-like elastase family member 3A

**Experiment:** 07 - S\_C-1 **Fraction:** S\_C-1

Match to Query 8677: 1419.685048 from(710.849800,2+)

Title: OECHL100310\_25.12423.12423.2.dta

Data file \\BOROMIR\Masse\Data LTQ-Orbitrap\Chrystelle Lacroix\Etude clinique sJPU\OECHL100310\_25.raw

**Monoisotopic mass of neutral peptide Mr(calc):** 1419.685013 **Fixed modifications:** Carbamidomethyl (C) (apply to specified residues or termini only) **Ions Score:** 53

**Expect:** 0.00068 **Matches :** 32/122 fragment ions using 73 most intense peaks ([help](#))

| #  | b                  | b <sup>++</sup>   | b*                 | b <sup>*++</sup> | b <sup>0</sup>     | b <sup>0++</sup> | Seq. | y                  | y <sup>++</sup>   | y*                | y <sup>*++</sup>  | y <sup>0</sup> | y <sup>0++</sup>  | #  |
|----|--------------------|-------------------|--------------------|------------------|--------------------|------------------|------|--------------------|-------------------|-------------------|-------------------|----------------|-------------------|----|
| 1  | 88.039304          | 44.523290         |                    |                  | 70.028739          | 35.518008        | S    |                    |                   |                   |                   |                |                   | 13 |
| 2  | <b>248.069953</b>  | 124.538614        |                    |                  | 230.059388         | 115.533332       | C    | 1333.660270        | 667.333773        | 1316.633721       | 658.820498        | 1315.649705    | 658.328490        | 12 |
| 3  | <b>347.138367</b>  | 174.072822        |                    |                  | 329.127802         | 165.067539       | V    | <b>1173.629621</b> | <b>587.318448</b> | 1156.603072       | <b>578.805174</b> | 1155.619056    | <b>578.313166</b> | 11 |
| 4  | <b>418.175481</b>  | 209.591379        |                    |                  | <b>400.164916</b>  | 200.586096       | A    | <b>1074.561207</b> | 537.784242        | 1057.534658       | 529.270967        | 1056.550642    | 528.778959        | 10 |
| 5  | <b>578.206130</b>  | 289.606703        |                    |                  | <b>560.195565</b>  | 280.601421       | C    | <b>1003.524093</b> | 502.265684        | <b>986.497544</b> | 493.752410        | 985.513528     | 493.260402        | 9  |
| 6  | 635.227594         | 318.117435        |                    |                  | 617.217029         | 309.112153       | G    | <b>843.493444</b>  | 422.250360        | 826.466895        | 413.737085        | 825.482879     | 413.245077        | 8  |
| 7  | <b>749.270521</b>  | 375.138899        | 732.243972         | 366.625624       | <b>731.259956</b>  | 366.133616       | N    | <b>786.471980</b>  | 393.739628        | 769.445431        | 385.226353        | 768.461415     | 384.734345        | 7  |
| 8  | <b>864.297464</b>  | 432.652370        | 847.270915         | 424.139096       | 846.286899         | 423.647088       | D    | 672.429053         | 336.718164        | 655.402504        | 328.204890        | 654.418488     | 327.712882        | 6  |
| 9  | <b>977.381528</b>  | 489.194402        | <b>960.354979</b>  | 480.681128       | <b>959.370963</b>  | 480.189120       | I    | <b>557.402110</b>  | 279.204693        | 540.375561        | 270.691418        |                |                   | 5  |
| 10 | <b>1048.418642</b> | 524.712959        | <b>1031.392093</b> | 516.199685       | 1030.408077        | 515.707677       | A    | <b>444.318046</b>  | 222.662661        | 427.291497        | 214.149386        |                |                   | 4  |
| 11 | <b>1161.502706</b> | <b>581.254991</b> | 1144.476157        | 572.741717       | 1143.492141        | 572.249709       | L    | <b>373.280932</b>  | 187.144104        | 356.254383        | 178.630829        |                |                   | 3  |
| 12 | <b>1274.586770</b> | 637.797023        | <b>1257.560221</b> | 629.283749       | <b>1256.576205</b> | 628.791740       | I    | <b>260.196868</b>  | 130.602072        | 243.170319        | 122.088797        |                |                   | 2  |
| 13 |                    |                   |                    |                  |                    |                  | K    | 147.112804         | 74.060040         | 130.086255        | 65.546765         |                |                   | 1  |

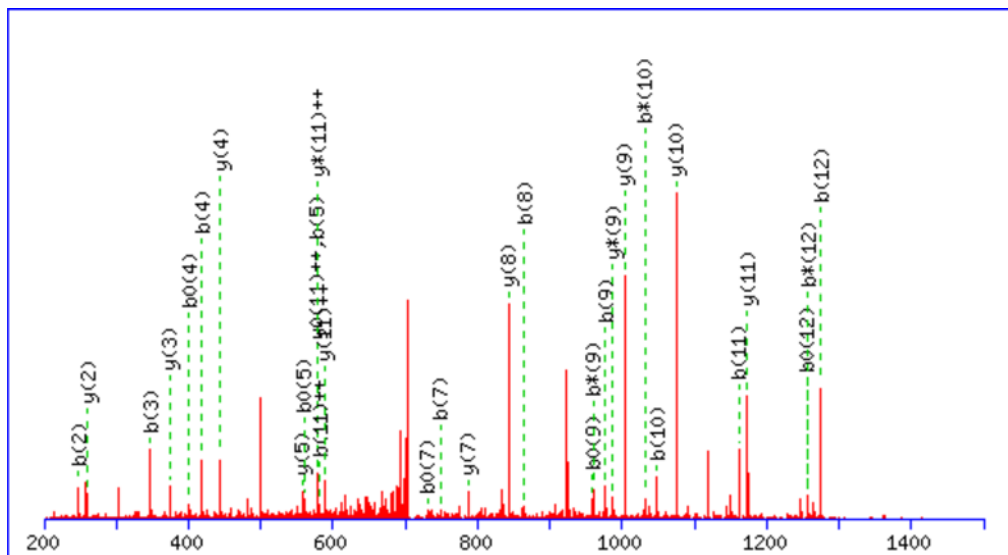

## Peptide View

MS/MS Fragmentation of **EAFQSVNPEFSPEALDNCCR**

Found in **IPI00011289**, Tax\_Id=9606 Gene\_Symbol=SLC28A1 Isoform 1 of Sodium/nucleoside cotransporter 1

**Experiment:** 07 - S\_C-1 **Fraction:** S\_C-1

Match to Query 14890: 2369.007448 from(1185.511000,2+)

Title: OECHL100310\_25.15941.15941.2.dta

Data file \\BOROMIR\Masse\Data LTQ-Orbitrap\Chrystelle Lacroix\Etude clinique sJPU\OECHL100310\_25.raw

**Monoisotopic mass of neutral peptide Mr(calc):** 2369.005234 **Fixed modifications:** Carbamidomethyl (C) (apply to specified residues or termini only) **Ions Score:** 73

**Expect:** 3e-006 **Matches :** 13/214 fragment ions using 17 most intense peaks ([help](#))

| # | b          | b <sup>++</sup> | b*         | b* <sup>++</sup> | b <sup>0</sup> | b <sup>0++</sup> | Seq.     | y                  | y <sup>++</sup> | y*          | y* <sup>++</sup> | y <sup>0</sup> | y <sup>0++</sup> |
|---|------------|-----------------|------------|------------------|----------------|------------------|----------|--------------------|-----------------|-------------|------------------|----------------|------------------|
| 1 | 130.049869 | 65.528572       |            |                  | 112.039304     | 56.523290        | <b>E</b> |                    |                 |             |                  |                |                  |
| 2 | 201.086983 | 101.047130      |            |                  | 183.076418     | 92.041847        | <b>A</b> | 2240.969929        | 1120.988602     | 2223.943380 | 1112.475328      | 2222.959364    | 1111.9833        |
| 3 | 348.155397 | 174.581336      |            |                  | 330.144832     | 165.576054       | <b>F</b> | 2169.932815        | 1085.470045     | 2152.906266 | 1076.956771      | 2151.922250    | 1076.4647        |
| 4 | 476.213975 | 238.610626      | 459.187426 | 230.097351       | 458.203410     | 229.605343       | <b>Q</b> | 2022.864401        | 1011.935838     | 2005.837852 | 1003.422564      | 2004.853836    | 1002.9305        |
| 5 | 563.246003 | 282.126640      | 546.219454 | 273.613365       | 545.235438     | 273.121357       | <b>S</b> | <b>1894.805823</b> | 947.906549      | 1877.779274 | 939.393275       | 1876.795258    | 938.9012         |
| 6 | 662.314417 | 331.660847      | 645.287868 | 323.147572       | 644.303852     | 322.655564       | <b>V</b> | <b>1807.773795</b> | 904.390535      | 1790.747246 | 895.877261       | 1789.763230    | 895.3852         |



|    |                    |             |             |             |             |                   |   |                    |            |             |            |             |          |
|----|--------------------|-------------|-------------|-------------|-------------|-------------------|---|--------------------|------------|-------------|------------|-------------|----------|
| 7  | <b>776.357344</b>  | 388.682310  | 759.330795  | 380.169036  | 758.346779  | 379.677028        | N | <b>1708.705381</b> | 854.856328 | 1691.678832 | 846.343054 | 1690.694816 | 845.8510 |
| 8  | 873.410108         | 437.208692  | 856.383559  | 428.695418  | 855.399543  | 428.203410        | P | <b>1594.662454</b> | 797.834865 | 1577.635905 | 789.321590 | 1576.651889 | 788.8295 |
| 9  | 1002.452701        | 501.729989  | 985.426152  | 493.216714  | 984.442136  | 492.724706        | E | 1497.609690        | 749.308483 | 1480.583141 | 740.795208 | 1479.599125 | 740.3032 |
| 10 | 1149.521115        | 575.264196  | 1132.494566 | 566.750921  | 1131.510550 | 566.258913        | F | <b>1368.567097</b> | 684.787186 | 1351.540548 | 676.273912 | 1350.556532 | 675.7819 |
| 11 | <b>1236.553143</b> | 618.780210  | 1219.526594 | 610.266935  | 1218.542578 | <b>609.774927</b> | S | <b>1221.498683</b> | 611.252979 | 1204.472134 | 602.739705 | 1203.488118 | 602.2476 |
| 12 | 1333.605907        | 667.306592  | 1316.579358 | 658.793317  | 1315.595342 | 658.301309        | P | <b>1134.466655</b> | 567.736965 | 1117.440106 | 559.223691 | 1116.456090 | 558.7316 |
| 13 | 1462.648500        | 731.827888  | 1445.621951 | 723.314614  | 1444.637935 | 722.822606        | E | 1037.413891        | 519.210583 | 1020.387342 | 510.697309 | 1019.403326 | 510.2053 |
| 14 | 1533.685614        | 767.346445  | 1516.659065 | 758.833171  | 1515.675049 | 758.341163        | A | 908.371298         | 454.689287 | 891.344749  | 446.176012 | 890.360733  | 445.6840 |
| 15 | 1646.769678        | 823.888477  | 1629.743129 | 815.375203  | 1628.759113 | 814.883194        | L | <b>837.334184</b>  | 419.170730 | 820.307635  | 410.657455 | 819.323619  | 410.1654 |
| 16 | 1761.796621        | 881.401949  | 1744.770072 | 872.888674  | 1743.786056 | 872.396666        | D | <b>724.250120</b>  | 362.628698 | 707.223571  | 354.115423 | 706.239555  | 353.6234 |
| 17 | 1875.839548        | 938.423412  | 1858.812999 | 929.910138  | 1857.828983 | 929.418129        | N | <b>609.223177</b>  | 305.115226 | 592.196628  | 296.601952 |             |          |
| 18 | 2035.870197        | 1018.438737 | 2018.843648 | 1009.925462 | 2017.859632 | 1009.433454       | C | 495.180250         | 248.093763 | 478.153701  | 239.580488 |             |          |
| 19 | 2195.900846        | 1098.454061 | 2178.874297 | 1089.940786 | 2177.890281 | 1089.448778       | C | 335.149601         | 168.078438 | 318.123052  | 159.565164 |             |          |
| 20 |                    |             |             |             |             |                   | R | 175.118952         | 88.063114  | 158.092403  | 79.549839  |             |          |

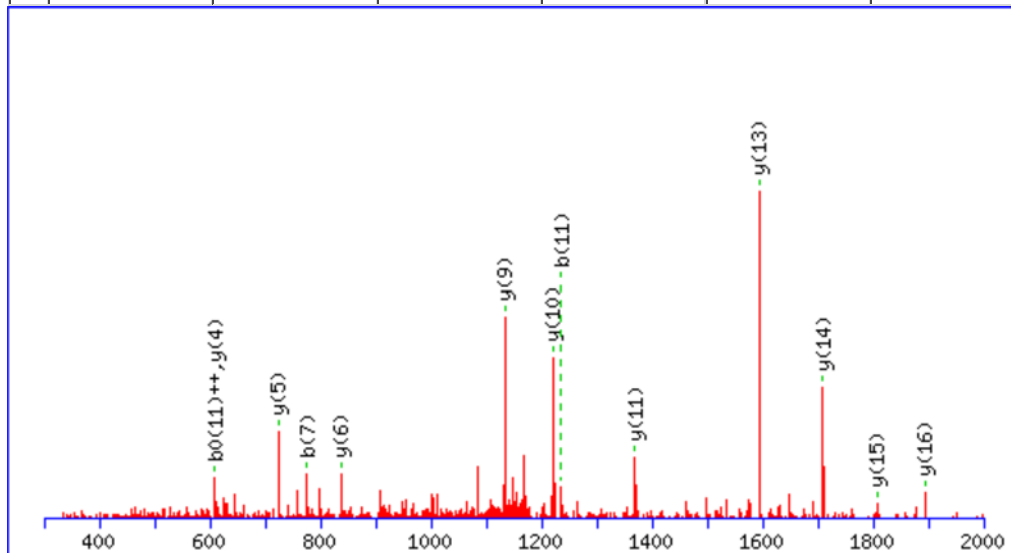

## Peptide View

MS/MS Fragmentation of **IESVLSSSGKR**Found in **IPI00018236**, Tax\_Id=9606 Gene\_Symbol=GM2A Ganglioside GM2 activator**Experiment:** 07 - S\_C-1 **Fraction:** S\_C-1

Match to Query 5295: 1161.635448 from(581.825000,2+)

Title: OECHL100310\_25.5315.5315.2.dta

Data file \\BOROMIR\Masse\Data LTQ-Orbitrap\Chrystelle Lacroix\Etude clinique sJPU\OECHL100310\_25.raw

**Monoisotopic mass of neutral peptide Mr(calc):** 1161.635330**Fixed modifications:** Carbamidomethyl (C) (apply to specified residues or termini only)**Ions Score:** 50**Expect:** 0.00064**Matches :** 23/94 fragment ions using 50 most intense peaks ([help](#))

| #         | b                 | b <sup>++</sup>   | b <sup>*</sup> | b <sup>*++</sup> | b <sup>0</sup>    | b <sup>0++</sup> | Seq.     | y                  | y <sup>++</sup>   | y <sup>*</sup>    | y <sup>*++</sup>  | y <sup>0</sup>    | y <sup>0++</sup>  | #         |
|-----------|-------------------|-------------------|----------------|------------------|-------------------|------------------|----------|--------------------|-------------------|-------------------|-------------------|-------------------|-------------------|-----------|
| <b>1</b>  | 114.091340        | 57.549308         |                |                  |                   |                  | <b>I</b> |                    |                   |                   |                   |                   |                   | <b>11</b> |
| <b>2</b>  | <b>243.133933</b> | 122.070605        |                |                  | 225.123368        | 113.065322       | <b>E</b> | <b>1049.558562</b> | <b>525.282919</b> | 1032.532013       | 516.769645        | 1031.547997       | 516.277637        | <b>10</b> |
| <b>3</b>  | <b>330.165961</b> | 165.586618        |                |                  | <b>312.155396</b> | 156.581336       | <b>S</b> | <b>920.515969</b>  | <b>460.761623</b> | <b>903.489420</b> | 452.248348        | <b>902.505404</b> | 451.756340        | <b>9</b>  |
| <b>4</b>  | <b>429.234375</b> | <b>215.120826</b> |                |                  | <b>411.223810</b> | 206.115543       | <b>V</b> | <b>833.483941</b>  | 417.245609        | 816.457392        | 408.732334        | 815.473376        | 408.240326        | <b>8</b>  |
| <b>5</b>  | 542.318439        | 271.662858        |                |                  | 524.307874        | 262.657575       | <b>L</b> | <b>734.415527</b>  | 367.711402        | 717.388978        | 359.198127        | 716.404962        | 358.706119        | <b>7</b>  |
| <b>6</b>  | 629.350467        | 315.178872        |                |                  | 611.339902        | 306.173589       | <b>S</b> | <b>621.331463</b>  | 311.169370        | 604.304914        | 302.656095        | 603.320898        | 302.164087        | <b>6</b>  |
| <b>7</b>  | 716.382495        | 358.694886        |                |                  | 698.371930        | 349.689603       | <b>S</b> | <b>534.299435</b>  | 267.653356        | 517.272886        | 259.140081        | 516.288870        | 258.648073        | <b>5</b>  |
| <b>8</b>  | 803.414523        | 402.210899        |                |                  | 785.403958        | 393.205617       | <b>S</b> | <b>447.267407</b>  | 224.137342        | 430.240858        | <b>215.624067</b> | <b>429.256842</b> | <b>215.132059</b> | <b>4</b>  |
| <b>9</b>  | 860.435987        | 430.721632        |                |                  | 842.425422        | 421.716349       | <b>G</b> | <b>360.235379</b>  | 180.621328        | 343.208830        | 172.108053        |                   |                   | <b>3</b>  |
| <b>10</b> | <b>988.530950</b> | 494.769113        | 971.504401     | 486.255838       | 970.520385        | 485.763830       | <b>K</b> | 303.213915         | 152.110596        | 286.187366        | 143.597321        |                   |                   | <b>2</b>  |
| <b>11</b> |                   |                   |                |                  |                   |                  | <b>R</b> | <b>175.118952</b>  | 88.063114         | 158.092403        | 79.549840         |                   |                   | <b>1</b>  |

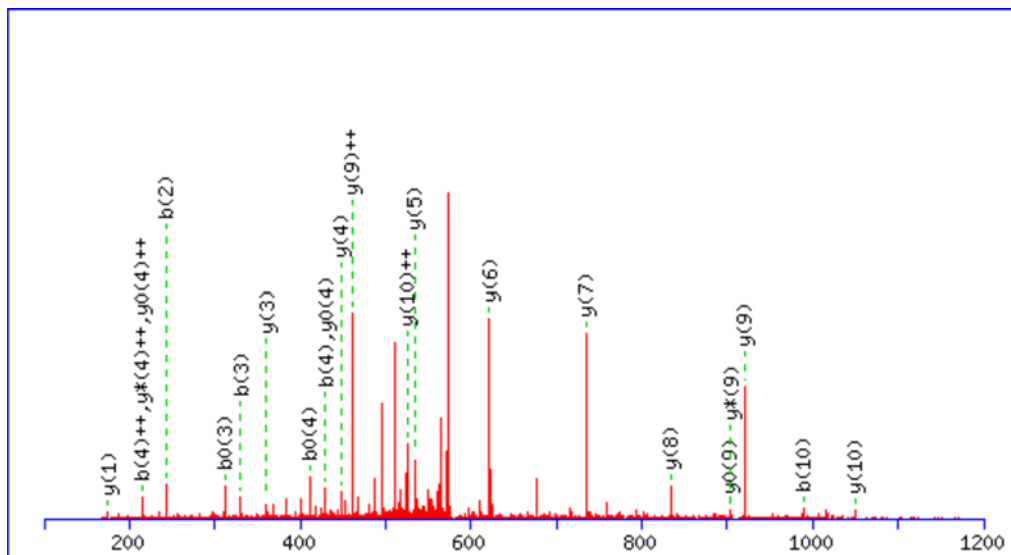

## Peptide View

MS/MS Fragmentation of **SDAAVDTSEITTK**

Found in **IPI00412977**, Tax\_Id=9606 Gene\_Symbol=- Prothymosin alpha

**Experiment:** 07 - S\_C-1 **Fraction:** S\_C-1

Match to Query 9119: 1465.679648 from(733.847100,2+)

Title: OECHL100310\_25.9372.9372.2.dta

Data file \\BOROMIR\Masse\Data LTQ-Orbitrap\Chrystelle Lacroix\Etude clinique sJPU\OECHL100310\_25.raw

**Monoisotopic mass of neutral peptide Mr(calc):** 1465.678391 **Fixed modifications:** Carbamidomethyl (C) (apply to specified residues or termini only) **Variable modifications:** N-term : Acetyl (N-term) **Ions Score:** 54 **Expect:** 0.00034 **Matches :** 26/128 fragment ions using 49 most intense peaks ([help](#))

| # | b          | b <sup>++</sup> | b <sup>0</sup> | b <sup>0++</sup> | Seq. | y           | y <sup>++</sup> | y*          | y <sup>*++</sup> | y <sup>0</sup> | y <sup>0++</sup> | #  |
|---|------------|-----------------|----------------|------------------|------|-------------|-----------------|-------------|------------------|----------------|------------------|----|
| 1 | 130.049869 | 65.528572       | 112.039304     | 56.523290        | S    |             |                 |             |                  |                |                  | 14 |
| 2 | 245.076812 | 123.042044      | 227.066247     | 114.036761       | D    | 1337.643082 | 669.325179      | 1320.616533 | 660.811905       | 1319.632517    | 660.319897       | 13 |
| 3 | 316.113926 | 158.560601      | 298.103361     | 149.555319       | A    | 1222.616139 | 611.811708      | 1205.589590 | 603.298433       | 1204.605574    | 602.806425       | 12 |
| 4 | 387.151040 | 194.079158      | 369.140475     | 185.073875       | A    | 1151.579025 | 576.293151      | 1134.552476 | 567.779876       | 1133.568460    | 567.287868       | 11 |
| 5 | 486.219454 | 243.613365      | 468.208889     | 234.608082       | V    | 1080.541911 | 540.774594      | 1063.515362 | 532.261319       | 1062.531346    | 531.769311       | 10 |
| 6 | 601.246397 | 301.126837      | 583.235832     | 292.121554       | D    | 981.473497  | 491.240387      | 964.446948  | 482.727112       | 963.462932     | 482.235104       | 9  |

|    |                    |                   |                    |            |   |                   |                   |            |            |            |            |   |
|----|--------------------|-------------------|--------------------|------------|---|-------------------|-------------------|------------|------------|------------|------------|---|
| 7  | <b>702.294076</b>  | 351.650676        | 684.283511         | 342.645394 | T | <b>866.446554</b> | 433.726915        | 849.420005 | 425.213641 | 848.435989 | 424.721633 | 8 |
| 8  | 789.326104         | 395.166690        | <b>771.315539</b>  | 386.161408 | S | 765.398875        | 383.203076        | 748.372326 | 374.689801 | 747.388310 | 374.197793 | 7 |
| 9  | 876.358132         | 438.682704        | <b>858.347567</b>  | 429.677421 | S | <b>678.366847</b> | 339.687062        | 661.340298 | 331.173787 | 660.356282 | 330.681779 | 6 |
| 10 | <b>1005.400725</b> | 503.204001        | <b>987.390160</b>  | 494.198718 | E | <b>591.334819</b> | <b>296.171048</b> | 574.308270 | 287.657773 | 573.324254 | 287.165765 | 5 |
| 11 | <b>1118.484789</b> | <b>559.746033</b> | <b>1100.474224</b> | 550.740750 | I | <b>462.292226</b> | 231.649751        | 445.265677 | 223.136477 | 444.281661 | 222.644469 | 4 |
| 12 | <b>1219.532468</b> | 610.269872        | 1201.521903        | 601.264590 | T | <b>349.208162</b> | 175.107719        | 332.181613 | 166.594445 | 331.197597 | 166.102437 | 3 |
| 13 | <b>1320.580147</b> | 660.793712        | <b>1302.569582</b> | 651.788429 | T | 248.160483        | 124.583879        | 231.133934 | 116.070605 | 230.149918 | 115.578597 | 2 |
| 14 |                    |                   |                    |            | K | 147.112804        | 74.060040         | 130.086255 | 65.546765  |            |            | 1 |

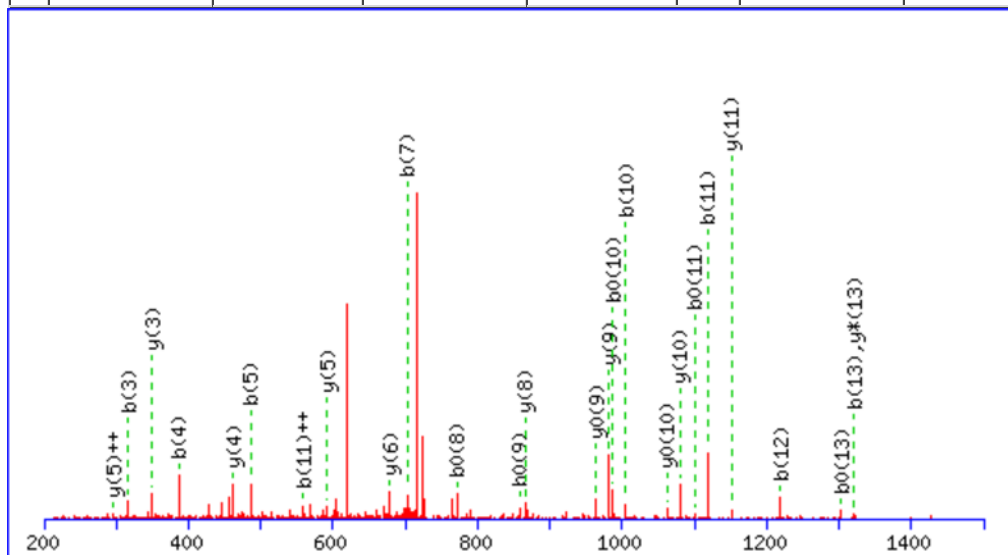

## Peptide View

MS/MS Fragmentation of **APVILGSPDDVLEFLK**

Found in **IP100073772**, Tax\_Id=9606 Gene\_Symbol=FBP1 Fructose-1,6-bisphosphatase 1

**Experiment:** 07 - S\_C-1 **Fraction:** S\_C-1

Match to Query 11325: 1711.936648 from(856.975600,2+)

Title: OECHL100310\_25.19856.19856.2.dta

Data file \\BOROMIR\Masse\Data LTQ-Orbitrap\Chrystelle Lacroix\Etude clinique sJPU\OECHL100310\_25.raw

**Monoisotopic mass of neutral peptide Mr(calc):** 1711.939636 **Fixed modifications:** Carbamidomethyl (C) (apply to specified residues or termini only) **Ions Score:** 51

**Expect:** 0.00042**Matches :** 26/132 fragment ions using 45 most intense peaks ([help](#))

| #  | b                  | b <sup>++</sup> | b <sup>0</sup>     | b <sup>0++</sup>  | Seq. | y                  | y <sup>++</sup>   | y*          | y <sup>*++</sup>  | y <sup>0</sup>     | y <sup>0++</sup>  | #  |
|----|--------------------|-----------------|--------------------|-------------------|------|--------------------|-------------------|-------------|-------------------|--------------------|-------------------|----|
| 1  | 72.044390          | 36.525833       |                    |                   | A    |                    |                   |             |                   |                    |                   | 16 |
| 2  | 169.097154         | 85.052215       |                    |                   | P    | 1641.909801        | 821.458538        | 1624.883252 | 812.945264        | 1623.899236        | 812.453256        | 15 |
| 3  | <b>268.165568</b>  | 134.586422      |                    |                   | V    | <b>1544.857037</b> | 772.932156        | 1527.830488 | 764.418882        | 1526.846472        | 763.926874        | 14 |
| 4  | <b>381.249632</b>  | 191.128454      |                    |                   | I    | <b>1445.788623</b> | <b>723.397949</b> | 1428.762074 | <b>714.884675</b> | <b>1427.778058</b> | 714.392667        | 13 |
| 5  | <b>494.333696</b>  | 247.670486      |                    |                   | L    | <b>1332.704559</b> | 666.855917        | 1315.678010 | 658.342643        | 1314.693994        | 657.850635        | 12 |
| 6  | <b>551.355160</b>  | 276.181218      |                    |                   | G    | <b>1219.620495</b> | 610.313885        | 1202.593946 | 601.800611        | 1201.609930        | 601.308603        | 11 |
| 7  | <b>638.387188</b>  | 319.697232      | <b>620.376623</b>  | <b>310.691950</b> | S    | <b>1162.599031</b> | 581.803153        | 1145.572482 | 573.289879        | 1144.588466        | 572.797871        | 10 |
| 8  | 735.439952         | 368.223614      | 717.429387         | 359.218332        | P    | <b>1075.567003</b> | 538.287139        | 1058.540454 | 529.773865        | 1057.556438        | 529.281857        | 9  |
| 9  | 850.466895         | 425.737086      | 832.456330         | 416.731803        | D    | 978.514239         | 489.760757        | 961.487690  | 481.247483        | 960.503674         | 480.755475        | 8  |
| 10 | 965.493838         | 483.250557      | 947.483273         | 474.245274        | D    | 863.487296         | 432.247286        | 846.460747  | <b>423.734011</b> | 845.476731         | <b>423.242003</b> | 7  |
| 11 | <b>1064.562252</b> | 532.784764      | 1046.551687        | <b>523.779481</b> | V    | 748.460353         | 374.733814        | 731.433804  | 366.220540        | 730.449788         | 365.728532        | 6  |
| 12 | 1177.646316        | 589.326796      | 1159.635751        | 580.321513        | L    | <b>649.391939</b>  | 325.199607        | 632.365390  | 316.686333        | 631.381374         | 316.194325        | 5  |
| 13 | <b>1306.688909</b> | 653.848092      | 1288.678344        | 644.842810        | E    | 536.307875         | <b>268.657576</b> | 519.281326  | 260.144301        | 518.297310         | 259.652293        | 4  |
| 14 | <b>1453.757323</b> | 727.382299      | <b>1435.746758</b> | 718.377017        | F    | 407.265282         | 204.136279        | 390.238733  | 195.623004        |                    |                   | 3  |
| 15 | <b>1566.841387</b> | 783.924331      | 1548.830822        | 774.919049        | L    | 260.196868         | 130.602072        | 243.170319  | 122.088797        |                    |                   | 2  |
| 16 |                    |                 |                    |                   | K    | 147.112804         | 74.060040         | 130.086255  | 65.546765         |                    |                   | 1  |

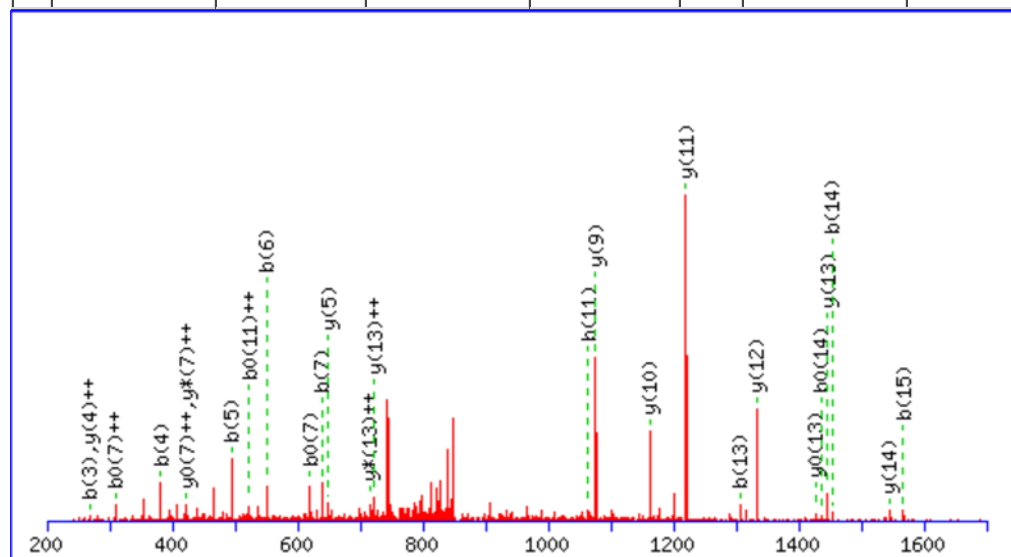

## Peptide View

MS/MS Fragmentation of **EVQLVESGGGLVKGGSRLR**

Found in **IPI00783024**, Tax\_Id=9606 Gene\_Symbol=- Myosin-reactive immunoglobulin heavy chain variable region (Fragment)

**Experiment:** 52 - PyC-1 **Fraction:** PyC-1

Match to Query 14285: 1881.034848 from(941.524700,2+)

Title: OECHL100310\_23.13104.13104.2.dta

Data file \\BOROMIR\Masse\Data LTQ-Orbitrap\Chrystelle Lacroix\Etude clinique sJPU\OECHL100310\_23.raw

**Monoisotopic mass of neutral peptide Mr(calc):** 1881.031982 **Fixed modifications:** Carbamidomethyl (C) (apply to specified residues or termini only) **Ions Score:** 79

**Expect:** 6e-007 **Matches :** 66/208 fragment ions using 122 most intense peaks ([help](#))

| #  | b           | b <sup>++</sup> | b*          | b <sup>*++</sup> | b <sup>0</sup> | b <sup>0++</sup> | Seq. | y           | y <sup>++</sup> | y*          | y <sup>*++</sup> | y <sup>0</sup> | y <sup>0++</sup> | #  |
|----|-------------|-----------------|-------------|------------------|----------------|------------------|------|-------------|-----------------|-------------|------------------|----------------|------------------|----|
| 1  | 130.049869  | 65.528572       |             |                  | 112.039304     | 56.523290        | E    |             |                 |             |                  |                |                  | 19 |
| 2  | 229.118283  | 115.062780      |             |                  | 211.107718     | 106.057497       | V    | 1752.996660 | 877.001968      | 1735.970111 | 868.488694       | 1734.986095    | 867.996686       | 18 |
| 3  | 357.176861  | 179.092069      | 340.150312  | 170.578794       | 339.166296     | 170.086786       | Q    | 1653.928246 | 827.467761      | 1636.901697 | 818.954487       | 1635.917681    | 818.462479       | 17 |
| 4  | 470.260925  | 235.634101      | 453.234376  | 227.120826       | 452.250360     | 226.628818       | L    | 1525.869668 | 763.438472      | 1508.843119 | 754.925198       | 1507.859103    | 754.433190       | 16 |
| 5  | 569.329339  | 285.168308      | 552.302790  | 276.655033       | 551.318774     | 276.163025       | V    | 1412.785604 | 706.896440      | 1395.759055 | 698.383166       | 1394.775039    | 697.891158       | 15 |
| 6  | 698.371932  | 349.689604      | 681.345383  | 341.176330       | 680.361367     | 340.684322       | E    | 1313.717190 | 657.362233      | 1296.690641 | 648.848959       | 1295.706625    | 648.356951       | 14 |
| 7  | 785.403960  | 393.205618      | 768.377411  | 384.692344       | 767.393395     | 384.200336       | S    | 1184.674597 | 592.840937      | 1167.648048 | 584.327662       | 1166.664032    | 583.835654       | 13 |
| 8  | 842.425424  | 421.716350      | 825.398875  | 413.203076       | 824.414859     | 412.711068       | G    | 1097.642569 | 549.324923      | 1080.616020 | 540.811648       | 1079.632004    | 540.319640       | 12 |
| 9  | 899.446888  | 450.227082      | 882.420339  | 441.713808       | 881.436323     | 441.221800       | G    | 1040.621105 | 520.814191      | 1023.594556 | 512.300916       | 1022.610540    | 511.808908       | 11 |
| 10 | 956.468352  | 478.737814      | 939.441803  | 470.224540       | 938.457787     | 469.732532       | G    | 983.599641  | 492.303459      | 966.573092  | 483.790184       | 965.589076     | 483.298176       | 10 |
| 11 | 1069.552416 | 535.279846      | 1052.525867 | 526.766572       | 1051.541851    | 526.274564       | L    | 926.578177  | 463.792727      | 909.551628  | 455.279452       | 908.567612     | 454.787444       | 9  |
| 12 | 1168.620830 | 584.814053      | 1151.594281 | 576.300779       | 1150.610265    | 575.808771       | V    | 813.494113  | 407.250695      | 796.467564  | 398.737420       | 795.483548     | 398.245412       | 8  |
| 13 | 1296.715793 | 648.861535      | 1279.689244 | 640.348260       | 1278.705228    | 639.856252       | K    | 714.425699  | 357.716487      | 697.399150  | 349.203213       | 696.415134     | 348.711205       | 7  |
| 14 | 1393.768557 | 697.387917      | 1376.742008 | 688.874642       | 1375.757992    | 688.382634       | P    | 586.330736  | 293.669006      | 569.304187  | 285.155731       | 568.320171     | 284.663723       | 6  |
| 15 | 1450.790021 | 725.898649      | 1433.763472 | 717.385374       | 1432.779456    | 716.893366       | G    | 489.277972  | 245.142624      | 472.251423  | 236.629349       | 471.267407     | 236.137341       | 5  |
| 16 | 1507.811485 | 754.409381      | 1490.784936 | 745.896106       | 1489.800920    | 745.404098       | G    | 432.256508  | 216.631892      | 415.229959  | 208.118617       | 414.245943     | 207.626609       | 4  |
| 17 | 1594.843513 | 797.925395      | 1577.816964 | 789.412120       | 1576.832948    | 788.920112       | S    | 375.235044  | 188.121160      | 358.208495  | 179.607885       | 357.224479     | 179.115877       | 3  |
| 18 | 1707.927577 | 854.467427      | 1690.901028 | 845.954152       | 1689.917012    | 845.462144       | L    | 288.203016  | 144.605146      | 271.176467  | 136.091871       |                |                  | 2  |
| 19 |             |                 |             |                  |                |                  | R    | 175.118952  | 88.063114       | 158.092403  | 79.549839        |                |                  | 1  |

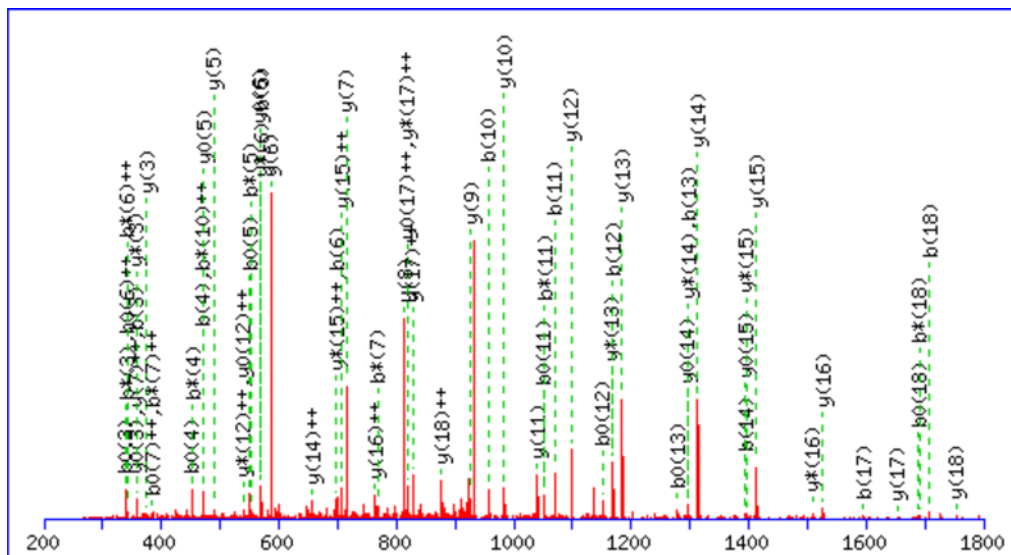

## Peptide View

MS/MS Fragmentation of **GQESSTDIKAPEGFAVR**

Found in **IPI00009793**, Tax\_Id=9606 Gene\_Symbol=C1RL Complement C1r subcomponent-like protein

**Experiment:** 52 - PyC-1 **Fraction:** PyC-1

Match to Query 13498: 1790.876248 from(896.445400,2+)

Title: OECHL100310\_23.10731.10731.2.dta

Data file \\BOROMIR\Masse\Data LTQ-Orbitrap\Chrystelle Lacroix\Etude clinique sJPU\OECHL100310\_23.raw

**Monoisotopic mass of neutral peptide Mr(calc):** 1790.879883 **Fixed modifications:** Carbamidomethyl (C) (apply to specified residues or termini only) **Ions Score:** 72

**Expect:** 1.1e-005 **Matches :** 19/176 fragment ions using 30 most intense peaks ([help](#))

| # | b                 | b <sup>++</sup> | b*         | b* <sup>++</sup> | b <sup>0</sup> | b <sup>0++</sup> | Seq.     | y                  | y <sup>++</sup>   | y*          | y* <sup>++</sup> | y <sup>0</sup> | y <sup>0++</sup> | #  |
|---|-------------------|-----------------|------------|------------------|----------------|------------------|----------|--------------------|-------------------|-------------|------------------|----------------|------------------|----|
| 1 | 58.028740         | 29.518008       |            |                  |                |                  | <b>G</b> |                    |                   |             |                  |                |                  | 17 |
| 2 | 186.087318        | 93.547297       | 169.060769 | 85.034023        |                |                  | <b>Q</b> | 1734.865705        | 867.936491        | 1717.839156 | 859.423216       | 1716.855140    | 858.931208       | 16 |
| 3 | <b>315.129911</b> | 158.068594      | 298.103362 | 149.555319       | 297.119346     | 149.063311       | <b>E</b> | 1606.807127        | 803.907202        | 1589.780578 | 795.393927       | 1588.796562    | 794.901919       | 15 |
| 4 | <b>402.161939</b> | 201.584608      | 385.135390 | 193.071333       | 384.151374     | 192.579325       | <b>S</b> | <b>1477.764534</b> | <b>739.385905</b> | 1460.737985 | 730.872631       | 1459.753969    | 730.380623       | 14 |
| 5 | 489.193967        | 245.100621      | 472.167418 | 236.587347       | 471.183402     | 236.095339       | <b>S</b> | <b>1390.732506</b> | 695.869891        | 1373.705957 | 687.356617       | 1372.721941    | 686.864609       | 13 |
| 6 | 590.241646        | 295.624461      | 573.215097 | 287.111187       | 572.231081     | 286.619179       | <b>T</b> | <b>1303.700478</b> | <b>652.353877</b> | 1286.673929 | 643.840603       | 1285.689913    | 643.348594       | 12 |

|    |                    |            |             |                   |             |            |          |                    |            |             |            |             |            |           |
|----|--------------------|------------|-------------|-------------------|-------------|------------|----------|--------------------|------------|-------------|------------|-------------|------------|-----------|
| 7  | <b>705.268589</b>  | 353.137933 | 688.242040  | 344.624658        | 687.258024  | 344.132650 | <b>D</b> | <b>1202.652799</b> | 601.830038 | 1185.626250 | 593.316763 | 1184.642234 | 592.824755 | <b>11</b> |
| 8  | 818.352653         | 409.679965 | 801.326104  | 401.166690        | 800.342088  | 400.674682 | <b>I</b> | <b>1087.625856</b> | 544.316566 | 1070.599307 | 535.803292 | 1069.615291 | 535.311284 | <b>10</b> |
| 9  | 946.447616         | 473.727446 | 929.421067  | 465.214172        | 928.437051  | 464.722164 | <b>K</b> | <b>974.541792</b>  | 487.774534 | 957.515243  | 479.261260 | 956.531227  | 478.769252 | <b>9</b>  |
| 10 | <b>1017.484730</b> | 509.246003 | 1000.458181 | 500.732729        | 999.474165  | 500.240721 | <b>A</b> | <b>846.446829</b>  | 423.727053 | 829.420280  | 415.213778 | 828.436264  | 414.721770 | <b>8</b>  |
| 11 | 1114.537494        | 557.772385 | 1097.510945 | <b>549.259111</b> | 1096.526929 | 548.767102 | <b>P</b> | <b>775.409715</b>  | 388.208496 | 758.383166  | 379.695221 | 757.399150  | 379.203213 | <b>7</b>  |
| 12 | <b>1243.580087</b> | 622.293682 | 1226.553538 | 613.780407        | 1225.569522 | 613.288399 | <b>E</b> | 678.356951         | 339.682114 | 661.330402  | 331.168839 | 660.346386  | 330.676831 | <b>6</b>  |
| 13 | 1300.601551        | 650.804414 | 1283.575002 | 642.291139        | 1282.590986 | 641.799131 | <b>G</b> | <b>549.314358</b>  | 275.160817 | 532.287809  | 266.647543 |             |            | <b>5</b>  |
| 14 | 1447.669965        | 724.338621 | 1430.643416 | 715.825346        | 1429.659400 | 715.333338 | <b>F</b> | 492.292894         | 246.650085 | 475.266345  | 238.136811 |             |            | <b>4</b>  |
| 15 | 1518.707079        | 759.857178 | 1501.680530 | 751.343903        | 1500.696514 | 750.851895 | <b>A</b> | <b>345.224480</b>  | 173.115878 | 328.197931  | 164.602603 |             |            | <b>3</b>  |
| 16 | <b>1617.775493</b> | 809.391385 | 1600.748944 | 800.878110        | 1599.764928 | 800.386102 | <b>V</b> | 274.187366         | 137.597321 | 257.160817  | 129.084047 |             |            | <b>2</b>  |
| 17 |                    |            |             |                   |             |            | <b>R</b> | 175.118952         | 88.063114  | 158.092403  | 79.549839  |             |            | <b>1</b>  |

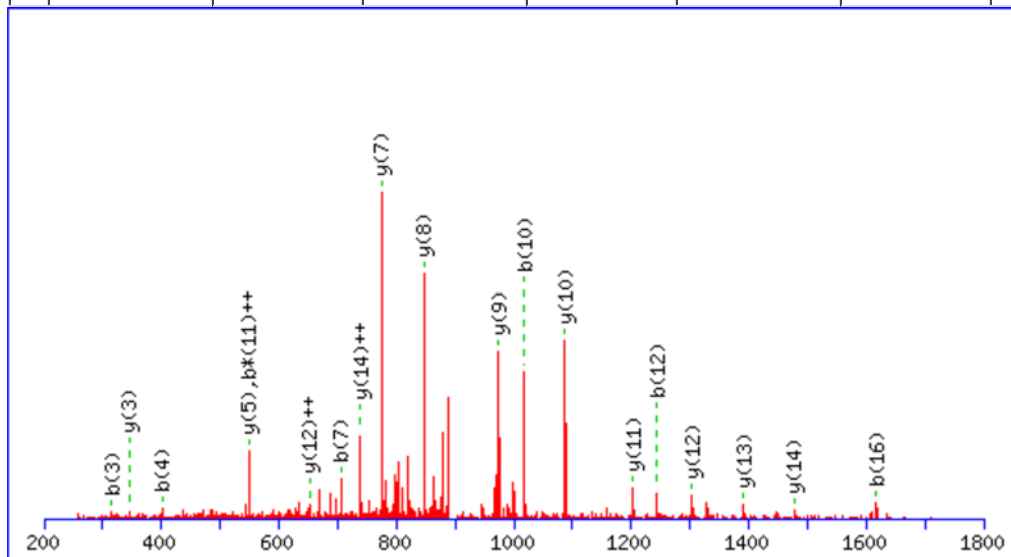

## Peptide View

MS/MS Fragmentation of **LLIYDASNLETGVPSR**

Found in **IP100003111**, Tax\_Id=9606 Gene\_Symbol=LOC652694 Ig kappa chain V-I region AU

Experiment: 52 - PyC-1 Fraction: PyC-1



Match to Query 13137: 1746.914448 from(874.464500,2+)

Title: OECHL100310\_23.16283.16283.2.dta

Data file \\BOROMIR\Masse\Data LTQ-Orbitrap\Chrystelle Lacroix\Etude clinique sJPU\OECHL100310\_23.raw

**Monoisotopic mass of neutral peptide Mr(calc):** 1746.915192**Fixed modifications:** Carbamidomethyl (C) (apply to specified residues or termini only)**Ions Score:** 82**Expect:** 6.6e-007**Matches :** 39/156 fragment ions using 87 most intense peaks ([help](#))

| #  | b                  | b <sup>++</sup>   | b*                 | b <sup>+++</sup> | b <sup>0</sup>     | b <sup>0++</sup> | Seq. | y                  | y <sup>++</sup>   | y*                 | y <sup>+++</sup> | y <sup>0</sup>     | y <sup>0++</sup>  | #  |
|----|--------------------|-------------------|--------------------|------------------|--------------------|------------------|------|--------------------|-------------------|--------------------|------------------|--------------------|-------------------|----|
| 1  | 114.091340         | 57.549308         |                    |                  |                    |                  | L    |                    |                   |                    |                  |                    |                   | 16 |
| 2  | 227.175404         | 114.091340        |                    |                  |                    |                  | L    | <b>1634.838427</b> | 817.922852        | 1617.811878        | 809.409577       | 1616.827862        | 808.917569        | 15 |
| 3  | <b>340.259468</b>  | 170.633372        |                    |                  |                    |                  | I    | <b>1521.754363</b> | <b>761.380820</b> | <b>1504.727814</b> | 752.867545       | 1503.743798        | 752.375537        | 14 |
| 4  | <b>503.322797</b>  | 252.165036        |                    |                  |                    |                  | Y    | <b>1408.670299</b> | <b>704.838788</b> | 1391.643750        | 696.325513       | <b>1390.659734</b> | 695.833505        | 13 |
| 5  | <b>618.349740</b>  | 309.678508        |                    |                  | 600.339175         | 300.673226       | D    | <b>1245.606970</b> | 623.307123        | 1228.580421        | 614.793849       | 1227.596405        | 614.301841        | 12 |
| 6  | <b>689.386854</b>  | 345.197065        |                    |                  | 671.376289         | 336.191782       | A    | <b>1130.580027</b> | 565.793652        | 1113.553478        | 557.280377       | 1112.569462        | 556.788369        | 11 |
| 7  | 776.418882         | 388.713079        |                    |                  | <b>758.408317</b>  | 379.707796       | S    | <b>1059.542913</b> | 530.275095        | 1042.516364        | 521.761820       | 1041.532348        | 521.269812        | 10 |
| 8  | 890.461809         | 445.734542        | 873.435260         | 437.221268       | 872.451244         | 436.729260       | N    | <b>972.510885</b>  | 486.759081        | <b>955.484336</b>  | 478.245806       | 954.500320         | <b>477.753798</b> | 9  |
| 9  | <b>1003.545873</b> | 502.276574        | <b>986.519324</b>  | 493.763300       | 985.535308         | 493.271292       | L    | <b>858.467958</b>  | 429.737617        | 841.441409         | 421.224343       | 840.457393         | 420.732335        | 8  |
| 10 | <b>1132.588466</b> | 566.797871        | 1115.561917        | 558.284597       | <b>1114.577901</b> | 557.792588       | E    | <b>745.383894</b>  | 373.195585        | 728.357345         | 364.682311       | 727.373329         | 364.190303        | 7  |
| 11 | <b>1233.636145</b> | <b>617.321710</b> | 1216.609596        | 608.808436       | 1215.625580        | 608.316428       | T    | <b>616.341301</b>  | 308.674289        | 599.314752         | 300.161014       | 598.330736         | 299.669006        | 6  |
| 12 | <b>1290.657609</b> | 645.832442        | 1273.631060        | 637.319168       | <b>1272.647044</b> | 636.827160       | G    | <b>515.293622</b>  | 258.150449        | 498.267073         | 249.637175       | 497.283057         | 249.145167        | 5  |
| 13 | <b>1389.726023</b> | 695.366649        | <b>1372.699474</b> | 686.853375       | <b>1371.715458</b> | 686.361367       | V    | <b>458.272158</b>  | 229.639717        | 441.245609         | 221.126443       | 440.261593         | 220.634435        | 4  |
| 14 | 1486.778787        | 743.893032        | 1469.752238        | 735.379757       | 1468.768222        | 734.887749       | P    | <b>359.203744</b>  | 180.105510        | <b>342.177195</b>  | 171.592236       | <b>341.193179</b>  | 171.100228        | 3  |
| 15 | <b>1573.810815</b> | 787.409046        | 1556.784266        | 778.895771       | 1555.800250        | 778.403763       | S    | <b>262.150980</b>  | 131.579128        | 245.124431         | 123.065854       | 244.140415         | 122.573846        | 2  |
| 16 |                    |                   |                    |                  |                    |                  | R    | 175.118952         | 88.063114         | 158.092403         | 79.549839        |                    |                   | 1  |

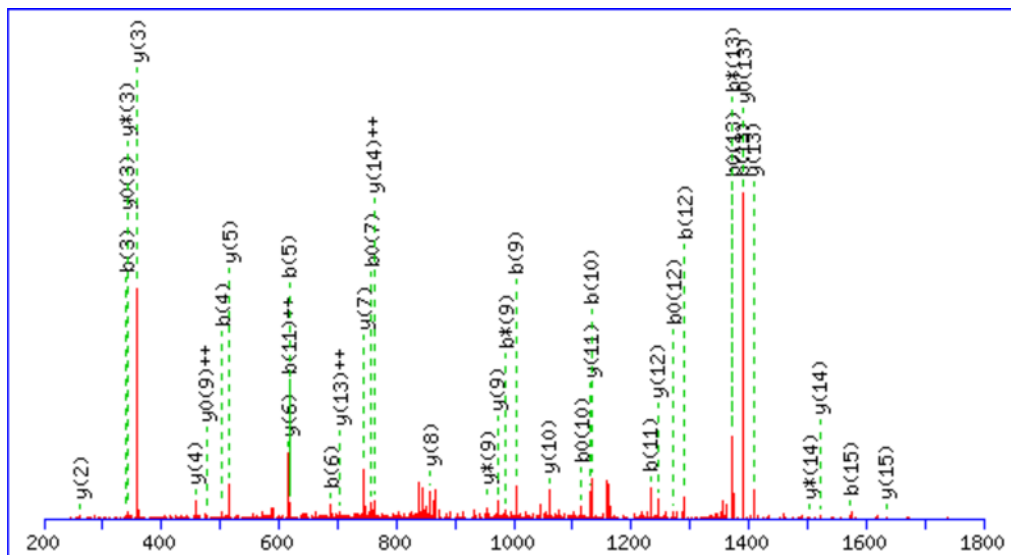

## Peptide View

MS/MS Fragmentation of **QLGPQPQDIYYEDGVVPTDRR**

Found in **IPI00015199**, Tax\_Id=9606 Gene\_Symbol=CD7 T-cell antigen CD7

**Experiment:** 52 - PyC-1 **Fraction:** PyC-1

Match to Query 18655: 2659.328172 from(887.450000,3+)

Title: OECHL100310\_23.16660.16660.3.dta

Data file \\BOROMIR\Masse\Data LTQ-Orbitrap\Chrystelle Lacroix\Etude clinique sJPU\OECHL100310\_23.raw

**Monoisotopic mass of neutral peptide Mr(calc):** 2659.324203 **Fixed modifications:** Carbamidomethyl (C) (apply to specified residues or termini only) **Ions Score:** 60

**Expect:** 0.0002 **Matches :** 57/246 fragment ions using 149 most intense peaks ([help](#))

| # | b          | b <sup>++</sup> | b*         | b <sup>*++</sup> | b <sup>0</sup> | b <sup>0++</sup> | Seq. | y           | y <sup>++</sup> | y*          | y <sup>*++</sup> | y <sup>0</sup> | y <sup>0++</sup> |
|---|------------|-----------------|------------|------------------|----------------|------------------|------|-------------|-----------------|-------------|------------------|----------------|------------------|
| 1 | 129.065854 | 65.036565       | 112.039305 | 56.523291        |                |                  | Q    |             |                 |             |                  |                |                  |
| 2 | 242.149918 | 121.578597      | 225.123369 | 113.065323       |                |                  | L    | 2532.272897 | 1266.640086     | 2515.246348 | 1258.126812      | 2514.262332    | 1257.6348        |
| 3 | 299.171382 | 150.089329      | 282.144833 | 141.576055       |                |                  | G    | 2419.188833 | 1210.098054     | 2402.162284 | 1201.584780      | 2401.178268    | 1201.0927        |
| 4 | 396.224146 | 198.615711      | 379.197597 | 190.102436       |                |                  | P    | 2362.167369 | 1181.587322     | 2345.140820 | 1173.074048      | 2344.156804    | 1172.5820        |
| 5 | 524.282724 | 262.645000      | 507.256175 | 254.131726       |                |                  | Q    | 2265.114605 | 1133.060940     | 2248.088056 | 1124.547666      | 2247.104040    | 1124.0556        |
| 6 | 621.335488 | 311.171382      | 604.308939 | 302.658108       |                |                  | P    | 2137.056027 | 1069.031651     | 2120.029478 | 1060.518377      | 2119.045462    | 1060.0263        |

|    |             |             |             |             |             |             |   |             |             |             |             |             |           |
|----|-------------|-------------|-------------|-------------|-------------|-------------|---|-------------|-------------|-------------|-------------|-------------|-----------|
| 7  | 749.394066  | 375.200671  | 732.367517  | 366.687397  |             |             | Q | 2040.003263 | 1020.505269 | 2022.976714 | 1011.991995 | 2021.992698 | 1011.4999 |
| 8  | 864.421009  | 432.714143  | 847.394460  | 424.200868  | 846.410444  | 423.708860  | D | 1911.944685 | 956.475980  | 1894.918136 | 947.962706  | 1893.934120 | 947.4706  |
| 9  | 977.505073  | 489.256175  | 960.478524  | 480.742900  | 959.494508  | 480.250892  | I | 1796.917742 | 898.962509  | 1779.891193 | 890.449234  | 1778.907177 | 889.9572  |
| 10 | 1090.589137 | 545.798206  | 1073.562588 | 537.284932  | 1072.578572 | 536.792924  | I | 1683.833678 | 842.420477  | 1666.807129 | 833.907202  | 1665.823113 | 833.4151  |
| 11 | 1253.652466 | 627.329871  | 1236.625917 | 618.816597  | 1235.641901 | 618.324589  | Y | 1570.749614 | 785.878445  | 1553.723065 | 777.365170  | 1552.739049 | 776.8731  |
| 12 | 1416.715795 | 708.861536  | 1399.689246 | 700.348261  | 1398.705230 | 699.856253  | Y | 1407.686285 | 704.346780  | 1390.659736 | 695.833506  | 1389.675720 | 695.3414  |
| 13 | 1545.758388 | 773.382832  | 1528.731839 | 764.869558  | 1527.747823 | 764.377549  | E | 1244.622956 | 622.815116  | 1227.596407 | 614.301841  | 1226.612391 | 613.8098  |
| 14 | 1660.785331 | 830.896304  | 1643.758782 | 822.383029  | 1642.774766 | 821.891021  | D | 1115.580363 | 558.293819  | 1098.553814 | 549.780545  | 1097.569798 | 549.2885  |
| 15 | 1717.806795 | 859.407036  | 1700.780246 | 850.893761  | 1699.796230 | 850.401753  | G | 1000.553420 | 500.780348  | 983.526871  | 492.267073  | 982.542855  | 491.7750  |
| 16 | 1816.875209 | 908.941243  | 1799.848660 | 900.427968  | 1798.864644 | 899.935960  | V | 943.531956  | 472.269616  | 926.505407  | 463.756341  | 925.521391  | 463.2643  |
| 17 | 1915.943623 | 958.475450  | 1898.917074 | 949.962175  | 1897.933058 | 949.470167  | V | 844.463542  | 422.735409  | 827.436993  | 414.222134  | 826.452977  | 413.7301  |
| 18 | 2012.996387 | 1007.001832 | 1995.969838 | 998.488557  | 1994.985822 | 997.996549  | P | 745.395128  | 373.201202  | 728.368579  | 364.687927  | 727.384563  | 364.1959  |
| 19 | 2114.044066 | 1057.525671 | 2097.017517 | 1049.012396 | 2096.033501 | 1048.520388 | T | 648.342364  | 324.674820  | 631.315815  | 316.161545  | 630.331799  | 315.6695  |
| 20 | 2215.091745 | 1108.049510 | 2198.065196 | 1099.536236 | 2197.081180 | 1099.044228 | T | 547.294685  | 274.150980  | 530.268136  | 265.637706  | 529.284120  | 265.1456  |
| 21 | 2330.118688 | 1165.562982 | 2313.092139 | 1157.049707 | 2312.108123 | 1156.557699 | D | 446.247006  | 223.627141  | 429.220457  | 215.113866  | 428.236441  | 214.6218  |
| 22 | 2486.219799 | 1243.613537 | 2469.193250 | 1235.100263 | 2468.209234 | 1234.608255 | R | 331.220063  | 166.113669  | 314.193514  | 157.600395  |             |           |
| 23 |             |             |             |             |             |             | R | 175.118952  | 88.063114   | 158.092403  | 79.549839   |             |           |

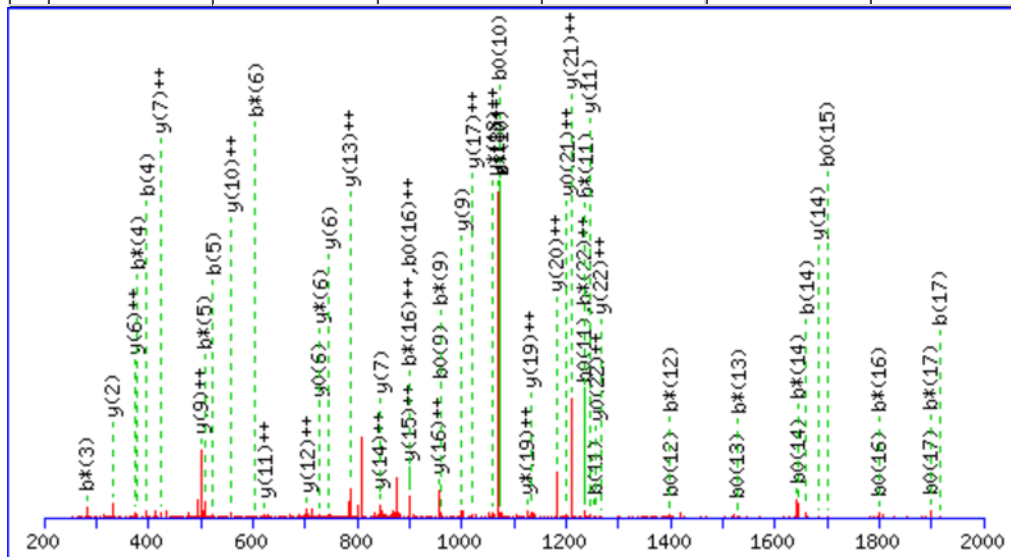

## Peptide View

MS/MS Fragmentation of **TENAVCGCSPGHFCIVQDGDHCAACR**

Found in **IPI00024331**, Tax\_Id=9606 Gene\_Symbol=TNFRSF14 Tumor necrosis factor receptor superfamily member 14

**Experiment:** 52 - PyC-1 **Fraction:** PyC-1

Match to Query 19602: 2977.181472 from(993.401100,3+)

Title: OECHL100310\_23.10262.10262.3.dta

Data file \\BOROMIR\Masse\Data LTQ-Orbitrap\Chrystelle Lacroix\Etude clinique sJPU\OECHL100310\_23.raw

**Monoisotopic mass of neutral peptide Mr(calc):** 2977.178284**Fixed modifications:** Carbamidomethyl (C) (apply to specified residues or termini only)**Ions Score:** 54

**Expect:** 4.9e-005**Matches :** 54/284 fragment ions using 120 most intense peaks ([help](#))

| #  | b                  | b <sup>++</sup>    | b*                 | b <sup>*++</sup>  | b <sup>0</sup>    | b <sup>0++</sup>  | Seq. | y                  | y <sup>++</sup>    | y*                 | y <sup>*++</sup>   | y <sup>0</sup>     | y <sup>0++</sup> |
|----|--------------------|--------------------|--------------------|-------------------|-------------------|-------------------|------|--------------------|--------------------|--------------------|--------------------|--------------------|------------------|
| 1  | 102.054955         | 51.531116          |                    |                   | 84.044390         | 42.525833         | T    |                    |                    |                    |                    |                    |                  |
| 2  | 231.097548         | 116.052412         |                    |                   | 213.086983        | 107.047130        | E    | 2877.137837        | 1439.072556        | 2860.111288        | 1430.559282        | 2859.127272        | 1430.0672        |
| 3  | <b>345.140475</b>  | 173.073876         | 328.113926         | 164.560601        | <b>327.129910</b> | 164.068593        | N    | 2748.095244        | <b>1374.551260</b> | 2731.068695        | 1366.037985        | 2730.084679        | 1365.5459        |
| 4  | <b>416.177589</b>  | 208.592433         | 399.151040         | 200.079158        | <b>398.167024</b> | 199.587150        | A    | 2634.052317        | <b>1317.529796</b> | 2617.025768        | 1309.016522        | 2616.041752        | 1308.5245        |
| 5  | <b>515.246003</b>  | 258.126640         | <b>498.219454</b>  | 249.613365        | <b>497.235438</b> | 249.121357        | V    | 2563.015203        | <b>1282.011239</b> | 2545.988654        | 1273.497965        | 2545.004638        | 1273.0059        |
| 6  | <b>675.276652</b>  | 338.141964         | 658.250103         | 329.628690        | 657.266087        | 329.136682        | C    | 2463.946789        | <b>1232.477032</b> | 2446.920240        | <b>1223.963758</b> | 2445.936224        | <b>1223.4717</b> |
| 7  | 732.298116         | 366.652696         | 715.271567         | 358.139422        | <b>714.287551</b> | 357.647414        | G    | 2303.916140        | <b>1152.461708</b> | 2286.889591        | <b>1143.948433</b> | 2285.905575        | 1143.4564        |
| 8  | 892.328765         | 446.668021         | 875.302216         | 438.154746        | 874.318200        | 437.662738        | C    | 2246.894676        | <b>1123.950976</b> | 2229.868127        | 1115.437701        | 2228.884111        | 1114.9456        |
| 9  | 979.360793         | 490.184035         | 962.334244         | 481.670760        | 961.350228        | 481.178752        | S    | 2086.864027        | <b>1043.935651</b> | 2069.837478        | 1035.422377        | 2068.853462        | 1034.9303        |
| 10 | 1076.413557        | 538.710417         | 1059.387008        | 530.197142        | 1058.402992       | 529.705134        | P    | 1999.831999        | <b>1000.419638</b> | <b>1982.805450</b> | 991.906363         | 1981.821434        | 991.4143         |
| 11 | 1133.435021        | 567.221149         | 1116.408472        | <b>558.707874</b> | 1115.424456       | <b>558.215866</b> | G    | 1902.779235        | <b>951.893256</b>  | 1885.752686        | 943.379981         | 1884.768670        | 942.8879         |
| 12 | 1270.493933        | 635.750605         | 1253.467384        | 627.237330        | 1252.483368       | 626.745322        | H    | 1845.757771        | 923.382524         | 1828.731222        | 914.869249         | <b>1827.747206</b> | 914.3772         |
| 13 | <b>1417.562347</b> | 709.284812         | 1400.535798        | 700.771537        | 1399.551782       | 700.279529        | F    | 1708.698859        | <b>854.853068</b>  | <b>1691.672310</b> | 846.339793         | <b>1690.688294</b> | 845.8477         |
| 14 | 1577.592996        | 789.300136         | 1560.566447        | 780.786862        | 1559.582431       | 780.294854        | C    | <b>1561.630445</b> | <b>781.318861</b>  | <b>1544.603896</b> | 772.805586         | 1543.619880        | 772.3135         |
| 15 | <b>1690.677060</b> | 845.842168         | <b>1673.650511</b> | 837.328894        | 1672.666495       | 836.836885        | I    | 1401.599796        | 701.303536         | 1384.573247        | 692.790262         | 1383.589231        | 692.2982         |
| 16 | 1789.745474        | 895.376375         | 1772.718925        | 886.863101        | 1771.734909       | 886.371093        | V    | <b>1288.515732</b> | <b>644.761504</b>  | 1271.489183        | 636.248230         | 1270.505167        | 635.7562         |
| 17 | 1917.804052        | 959.405664         | 1900.777503        | 950.892390        | 1899.793487       | 950.400382        | Q    | 1189.447318        | 595.227297         | 1172.420769        | <b>586.714023</b>  | <b>1171.436753</b> | <b>586.2220</b>  |
| 18 | 2032.830995        | 1016.919136        | 2015.804446        | 1008.405861       | 2014.820430       | 1007.913853       | D    | <b>1061.388740</b> | <b>531.198008</b>  | <b>1044.362191</b> | 522.684734         | 1043.378175        | 522.1927         |
| 19 | 2089.852459        | <b>1045.429868</b> | 2072.825910        | 1036.916593       | 2071.841894       | 1036.424585       | G    | <b>946.361797</b>  | <b>473.684537</b>  | 929.335248         | 465.171262         | 928.351232         | 464.6792         |
| 20 | 2204.879402        | 1102.943339        | 2187.852853        | 1094.430064       | 2186.868837       | 1093.938056       | D    | 889.340333         | 445.173804         | 872.313784         | 436.660530         | 871.329768         | 436.1685         |
| 21 | 2341.938314        | <b>1171.472795</b> | 2324.911765        | 1162.959520       | 2323.927749       | 1162.467512       | H    | <b>774.313390</b>  | <b>387.660333</b>  | <b>757.286841</b>  | 379.147059         |                    |                  |

|    |             |             |             |             |             |             |   |            |            |            |            |  |  |
|----|-------------|-------------|-------------|-------------|-------------|-------------|---|------------|------------|------------|------------|--|--|
| 22 | 2501.968963 | 1251.488119 | 2484.942414 | 1242.974845 | 2483.958398 | 1242.482837 | C | 637.254478 | 319.130877 | 620.227929 | 310.617603 |  |  |
| 23 | 2573.006077 | 1287.006676 | 2555.979528 | 1278.493402 | 2554.995512 | 1278.001394 | A | 477.223829 | 239.115553 | 460.197280 | 230.602278 |  |  |
| 24 | 2644.043191 | 1322.525234 | 2627.016642 | 1314.011959 | 2626.032626 | 1313.519951 | A | 406.186715 | 203.596995 | 389.160166 | 195.083721 |  |  |
| 25 | 2804.073840 | 1402.540558 | 2787.047291 | 1394.027283 | 2786.063275 | 1393.535275 | C | 335.149601 | 168.078438 | 318.123052 | 159.565164 |  |  |
| 26 |             |             |             |             |             |             | R | 175.118952 | 88.063114  | 158.092403 | 79.549839  |  |  |

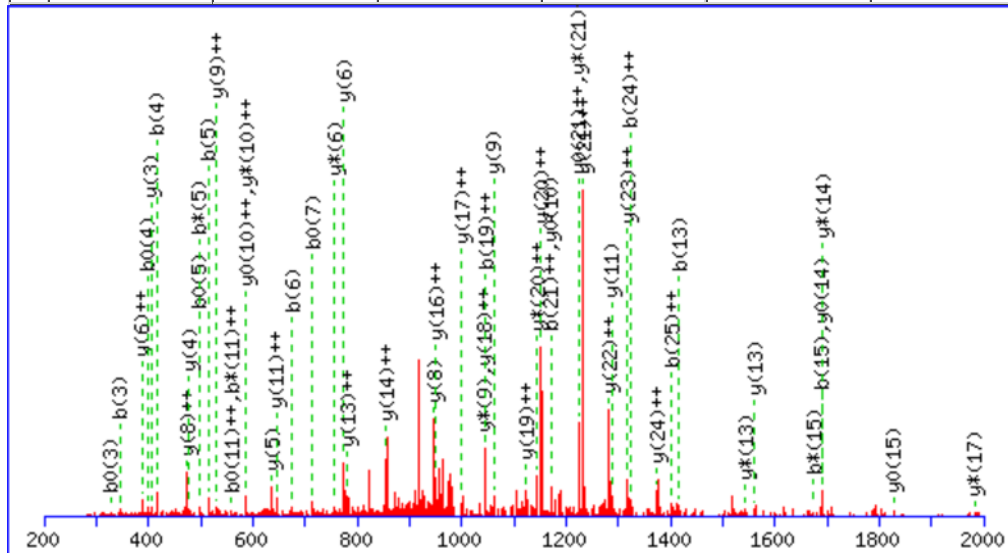

## Peptide View

MS/MS Fragmentation of **CIESLIAVFQK**

Found in **IPI00013895**, Tax\_Id=9606 Gene\_Symbol=S100A11 Protein S100-A11

**Experiment:** 52 - PyC-1 **Fraction:** PyC-1

Match to Query 8023: 1306.695248 from(654.354900,2+)

Title: OECHL100310\_23.19833.19833.2.dta

Data file \\BOROMIR\Masse\Data LTQ-Orbitrap\Chrystelle Lacroix\Etude clinique sJPU\OECHL100310\_23.raw

**Monoisotopic mass of neutral peptide Mr(calc):** 1306.695496 **Fixed modifications:** Carbamidomethyl (C) (apply to specified residues or termini only) **Ions Score:** 50

**Expect:** 0.00064 **Matches :** 22/84 fragment ions using 44 most intense peaks ([help](#))

| # | b          | b <sup>++</sup> | b <sup>*</sup> | b <sup>*++</sup> | b <sup>0</sup> | b <sup>0++</sup> | Seq. | y | y <sup>++</sup> | y <sup>*</sup> | y <sup>*++</sup> | y <sup>0</sup> | y <sup>0++</sup> | #  |
|---|------------|-----------------|----------------|------------------|----------------|------------------|------|---|-----------------|----------------|------------------|----------------|------------------|----|
| 1 | 161.037925 | 81.022600       |                |                  |                |                  | C    |   |                 |                |                  |                |                  | 11 |

|    |                    |            |                    |            |                   |            |   |                    |            |             |                   |                    |            |    |
|----|--------------------|------------|--------------------|------------|-------------------|------------|---|--------------------|------------|-------------|-------------------|--------------------|------------|----|
| 2  | <b>274.121989</b>  | 137.564632 |                    |            |                   |            | I | 1147.672137        | 574.339707 | 1130.645588 | 565.826432        | 1129.661572        | 565.334424 | 10 |
| 3  | <b>403.164582</b>  | 202.085929 |                    |            | 385.154017        | 193.080647 | E | <b>1034.588073</b> | 517.797675 | 1017.561524 | 509.284400        | <b>1016.577508</b> | 508.792392 | 9  |
| 4  | 490.196610         | 245.601943 |                    |            | 472.186045        | 236.596661 | S | <b>905.545480</b>  | 453.276378 | 888.518931  | 444.763104        | <b>887.534915</b>  | 444.271096 | 8  |
| 5  | <b>603.280674</b>  | 302.143975 |                    |            | <b>585.270109</b> | 293.138693 | L | <b>818.513452</b>  | 409.760364 | 801.486903  | 401.247090        |                    |            | 7  |
| 6  | <b>716.364738</b>  | 358.686007 |                    |            | 698.354173        | 349.680725 | I | <b>705.429388</b>  | 353.218332 | 688.402839  | <b>344.705058</b> |                    |            | 6  |
| 7  | <b>787.401852</b>  | 394.204564 |                    |            | 769.391287        | 385.199282 | A | <b>592.345324</b>  | 296.676300 | 575.318775  | 288.163026        |                    |            | 5  |
| 8  | <b>886.470266</b>  | 443.738771 |                    |            | <b>868.459701</b> | 434.733489 | V | <b>521.308210</b>  | 261.157743 | 504.281661  | 252.644469        |                    |            | 4  |
| 9  | <b>1033.538680</b> | 517.272978 |                    |            | 1015.528115       | 508.267696 | F | <b>422.239796</b>  | 211.623536 | 405.213247  | 203.110261        |                    |            | 3  |
| 10 | <b>1161.597258</b> | 581.302267 | <b>1144.570709</b> | 572.788993 | 1143.586693       | 572.296985 | Q | <b>275.171382</b>  | 138.089329 | 258.144833  | 129.576054        |                    |            | 2  |
| 11 |                    |            |                    |            |                   |            | K | 147.112804         | 74.060040  | 130.086255  | 65.546765         |                    |            | 1  |

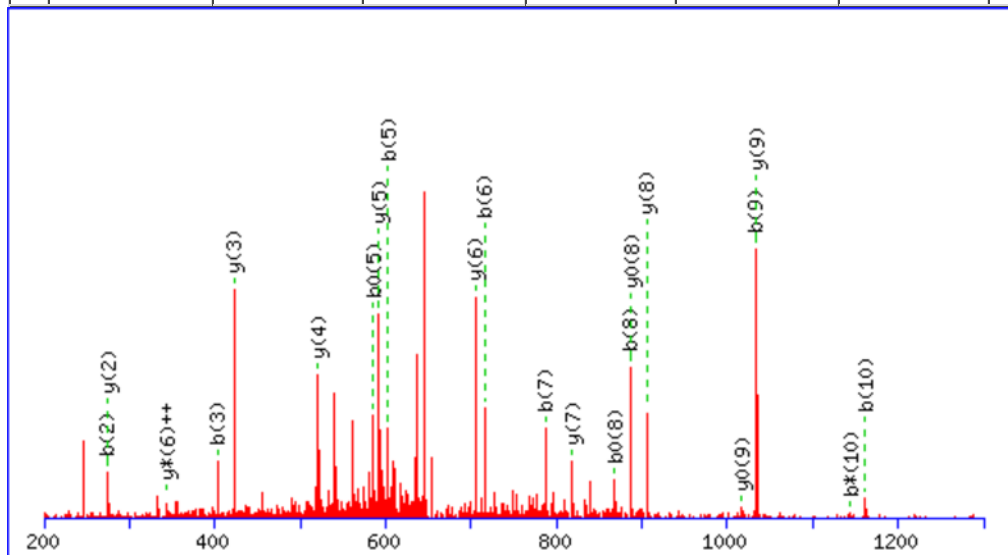

## Peptide View

MS/MS Fragmentation of **NPVLQQDAHSSVTITPQR**

Found in **IP100410488**, Tax\_Id=9606 Gene\_Symbol=CD276 Isoform 1 of CD276 antigen

**Experiment:** 52 - PyC-1 **Fraction:** PyC-1

Match to Query 15202: 1990.027048 from(996.020800,2+)

Title: OECHL100310\_23.9174.9174.2.dta

Data file \\BOROMIR\Masse\Data LTQ-Orbitrap\Chrystelle Lacroix\Etude clinique sJPU\OECHL100310\_23.raw

**Monoisotopic mass of neutral peptide Mr(calc):** 1990.023209**Fixed modifications:** Carbamidomethyl (C) (apply to specified residues or termini only)**Ions Score:** 94**Expect:** 4.7e-008**Matches :** 30/186 fragment ions using 49 most intense peaks ([help](#))

| #  | b           | b <sup>++</sup> | b*          | b <sup>*++</sup> | b <sup>0</sup> | b <sup>0++</sup> | Seq. | y           | y <sup>++</sup> | y*          | y <sup>*++</sup> | y <sup>0</sup> | y <sup>0++</sup> | #  |
|----|-------------|-----------------|-------------|------------------|----------------|------------------|------|-------------|-----------------|-------------|------------------|----------------|------------------|----|
| 1  | 115.050203  | 58.028740       | 98.023654   | 49.515465        |                |                  | N    |             |                 |             |                  |                |                  | 18 |
| 2  | 212.102967  | 106.555121      | 195.076418  | 98.041847        |                |                  | P    | 1876.987553 | 938.997415      | 1859.961004 | 930.484140       | 1858.976988    | 929.992132       | 17 |
| 3  | 311.171381  | 156.089328      | 294.144832  | 147.576054       |                |                  | V    | 1779.934789 | 890.471033      | 1762.908240 | 881.957758       | 1761.924224    | 881.465750       | 16 |
| 4  | 424.255445  | 212.631361      | 407.228896  | 204.118086       |                |                  | L    | 1680.866375 | 840.936826      | 1663.839826 | 832.423551       | 1662.855810    | 831.931543       | 15 |
| 5  | 552.314023  | 276.660650      | 535.287474  | 268.147375       |                |                  | Q    | 1567.782311 | 784.394794      | 1550.755762 | 775.881519       | 1549.771746    | 775.389511       | 14 |
| 6  | 680.372601  | 340.689939      | 663.346052  | 332.176664       |                |                  | Q    | 1439.723733 | 720.365505      | 1422.697184 | 711.852230       | 1421.713168    | 711.360222       | 13 |
| 7  | 795.399544  | 398.203410      | 778.372995  | 389.690136       | 777.388979     | 389.198128       | D    | 1311.665155 | 656.336215      | 1294.638606 | 647.822941       | 1293.654590    | 647.330933       | 12 |
| 8  | 866.436658  | 433.721967      | 849.410109  | 425.208693       | 848.426093     | 424.716685       | A    | 1196.638212 | 598.822744      | 1179.611663 | 590.309470       | 1178.627647    | 589.817462       | 11 |
| 9  | 1003.495570 | 502.251423      | 986.469021  | 493.738149       | 985.485005     | 493.246141       | H    | 1125.601098 | 563.304187      | 1108.574549 | 554.790913       | 1107.590533    | 554.298905       | 10 |
| 10 | 1090.527598 | 545.767437      | 1073.501049 | 537.254163       | 1072.517033    | 536.762155       | S    | 988.542186  | 494.774731      | 971.515637  | 486.261457       | 970.531621     | 485.769449       | 9  |
| 11 | 1177.559626 | 589.283451      | 1160.533077 | 580.770177       | 1159.549061    | 580.278169       | S    | 901.510158  | 451.258717      | 884.483609  | 442.745443       | 883.499593     | 442.253435       | 8  |
| 12 | 1276.628040 | 638.817658      | 1259.601491 | 630.304384       | 1258.617475    | 629.812376       | V    | 814.478130  | 407.742703      | 797.451581  | 399.229428       | 796.467565     | 398.737420       | 7  |
| 13 | 1377.675719 | 689.341498      | 1360.649170 | 680.828223       | 1359.665154    | 680.336215       | T    | 715.409716  | 358.208496      | 698.383167  | 349.695221       | 697.399151     | 349.203213       | 6  |
| 14 | 1490.759783 | 745.883530      | 1473.733234 | 737.370255       | 1472.749218    | 736.878247       | I    | 614.362037  | 307.684656      | 597.335488  | 299.171382       | 596.351472     | 298.679374       | 5  |
| 15 | 1591.807462 | 796.407369      | 1574.780913 | 787.894095       | 1573.796897    | 787.402087       | T    | 501.277973  | 251.142624      | 484.251424  | 242.629350       | 483.267408     | 242.137342       | 4  |
| 16 | 1688.860226 | 844.933751      | 1671.833677 | 836.420477       | 1670.849661    | 835.928469       | P    | 400.230294  | 200.618785      | 383.203745  | 192.105510       |                |                  | 3  |
| 17 | 1816.918804 | 908.963040      | 1799.892255 | 900.449766       | 1798.908239    | 899.957758       | Q    | 303.177530  | 152.092403      | 286.150981  | 143.579128       |                |                  | 2  |
| 18 |             |                 |             |                  |                |                  | R    | 175.118952  | 88.063114       | 158.092403  | 79.549839        |                |                  | 1  |

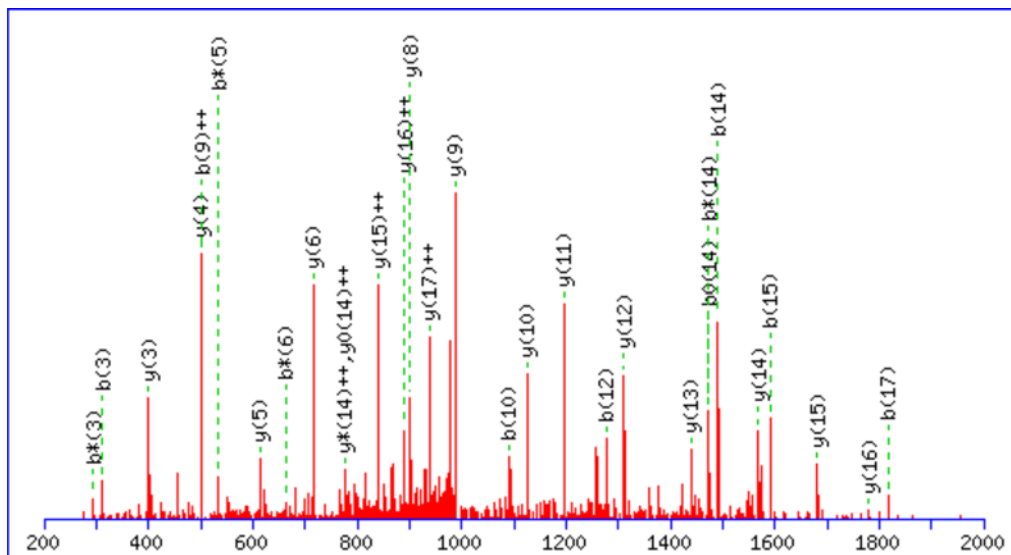

## Peptide View

### MS/MS Fragmentation of **GLGDDTALNDAR**

Found in **IPI00216914**, Tax\_Id=9606 Gene\_Symbol=VMO1 Vitelline membrane outer layer protein 1 homolog

**Experiment:** 52 - PyC-1 **Fraction:** PyC-1

Match to Query 6665: 1216.567648 from(609.291100,2+)

Title: OECHL100310\_23.8102.8102.2.dta

Data file \\BOROMIR\Masse\Data LTQ-Orbitrap\Chrystelle Lacroix\Etude clinique sJPU\OECHL100310\_23.raw

**Monoisotopic mass of neutral peptide Mr(calc):** 1216.568390 **Fixed modifications:** Carbamidomethyl (C) (apply to specified residues or termini only) **Ions Score:** 86

**Expect:** 2.3e-007 **Matches :** 27/106 fragment ions using 33 most intense peaks ([help](#))

| # | b                 | b <sup>++</sup> | b* | b <sup>*++</sup> | b <sup>0</sup>    | b <sup>0++</sup> | Seq.     | y                  | y <sup>++</sup>   | y*                | y <sup>*++</sup> | y <sup>0</sup>    | y <sup>0++</sup> | #         |
|---|-------------------|-----------------|----|------------------|-------------------|------------------|----------|--------------------|-------------------|-------------------|------------------|-------------------|------------------|-----------|
| 1 | 58.028740         | 29.518008       |    |                  |                   |                  | <b>G</b> |                    |                   |                   |                  |                   |                  | <b>12</b> |
| 2 | 171.112804        | 86.060040       |    |                  |                   |                  | <b>L</b> | 1160.554207        | 580.780742        | 1143.527658       | 572.267467       | 1142.543642       | 571.775459       | <b>11</b> |
| 3 | 228.134268        | 114.570772      |    |                  |                   |                  | <b>G</b> | <b>1047.470143</b> | <b>524.238710</b> | 1030.443594       | 515.725435       | 1029.459578       | 515.233427       | <b>10</b> |
| 4 | <b>343.161211</b> | 172.084243      |    |                  | 325.150646        | 163.078961       | <b>D</b> | <b>990.448679</b>  | 495.727978        | <b>973.422130</b> | 487.214703       | <b>972.438114</b> | 486.722695       | <b>9</b>  |
| 5 | <b>458.188154</b> | 229.597715      |    |                  | <b>440.177589</b> | 220.592433       | <b>D</b> | <b>875.421736</b>  | 438.214506        | <b>858.395187</b> | 429.701232       | <b>857.411171</b> | 429.209224       | <b>8</b>  |
| 6 | <b>559.235833</b> | 280.121555      |    |                  | 541.225268        | 271.116272       | <b>T</b> | <b>760.394793</b>  | 380.701035        | <b>743.368244</b> | 372.187760       | 742.384228        | 371.695752       | <b>7</b>  |



|    |             |            |             |            |             |            |   |            |            |            |            |            |            |   |
|----|-------------|------------|-------------|------------|-------------|------------|---|------------|------------|------------|------------|------------|------------|---|
| 7  | 630.272947  | 315.640112 |             |            | 612.262382  | 306.634829 | A | 659.347114 | 330.177195 | 642.320565 | 321.663921 | 641.336549 | 321.171913 | 6 |
| 8  | 743.357011  | 372.182144 |             |            | 725.346446  | 363.176861 | L | 588.310000 | 294.658638 | 571.283451 | 286.145364 | 570.299435 | 285.653356 | 5 |
| 9  | 857.399938  | 429.203607 | 840.373389  | 420.690333 | 839.389373  | 420.198325 | N | 475.225936 | 238.116606 | 458.199387 | 229.603331 | 457.215371 | 229.111323 | 4 |
| 10 | 972.426881  | 486.717079 | 955.400332  | 478.203804 | 954.416316  | 477.711796 | D | 361.183009 | 181.095142 | 344.156460 | 172.581868 | 343.172444 | 172.089860 | 3 |
| 11 | 1043.463995 | 522.235636 | 1026.437446 | 513.722361 | 1025.453430 | 513.230353 | A | 246.156066 | 123.581671 | 229.129517 | 115.068397 |            |            | 2 |
| 12 |             |            |             |            |             |            | R | 175.118952 | 88.063114  | 158.092403 | 79.549839  |            |            | 1 |

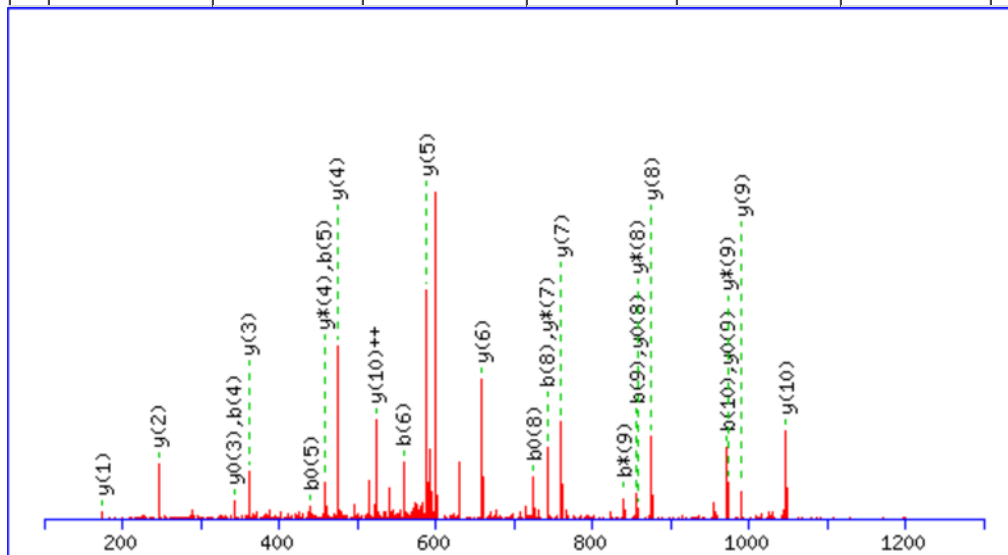

## Peptide View

MS/MS Fragmentation of **AISSIGLECQSVTSR**

Found in **IP100006988**, Tax\_Id=9606 Gene\_Symbol=RETN Resistin

Experiment: 52 - PyC-1 Fraction: PyC-1

Match to Query 11358: 1606.799448 from(804.407000,2+)

Title: OECHL100310\_23.11307.11307.2.dta

Data file \\BOROMIR\Masse\Data LTQ-Orbitrap\Chrystelle Lacroix\Etude clinique sJPU\OECHL100310\_23.raw

**Monoisotopic mass of neutral peptide Mr(calc):** 1606.798462 **Fixed modifications:** Carbamidomethyl (C) (apply to specified residues or termini only) **Ions Score:** 73

**Expect:** 6.6e-006 **Matches :** 40/144 fragment ions using 80 most intense peaks ([help](#))

| # | b | b <sup>++</sup> | b <sup>*</sup> | b <sup>*++</sup> | b <sup>0</sup> | b <sup>0++</sup> | Seq. | y | y <sup>++</sup> | y <sup>*</sup> | y <sup>*++</sup> | y <sup>0</sup> | y <sup>0++</sup> | # |
|---|---|-----------------|----------------|------------------|----------------|------------------|------|---|-----------------|----------------|------------------|----------------|------------------|---|
|---|---|-----------------|----------------|------------------|----------------|------------------|------|---|-----------------|----------------|------------------|----------------|------------------|---|

|    |                    |            |                    |            |                    |            |   |                    |                   |                    |             |                   |             |            |    |
|----|--------------------|------------|--------------------|------------|--------------------|------------|---|--------------------|-------------------|--------------------|-------------|-------------------|-------------|------------|----|
| 1  | 72.044390          | 36.525833  |                    |            |                    |            |   | A                  |                   |                    |             |                   |             |            | 15 |
| 2  | 185.128454         | 93.067865  |                    |            |                    |            |   | I                  | 1536.768633       | 768.887955         | 1519.742084 | 760.374680        | 1518.758068 | 759.882672 | 14 |
| 3  | <b>272.160482</b>  | 136.583879 |                    |            | 254.149917         | 127.578596 | S | 1423.684569        | <b>712.345923</b> | 1406.658020        | 703.832648  | 1405.674004       | 703.340640  | 13         |    |
| 4  | <b>359.192510</b>  | 180.099893 |                    |            | <b>341.181945</b>  | 171.094610 | S | 1336.652541        | <b>668.829909</b> | 1319.625992        | 660.316634  | 1318.641976       | 659.824626  | 12         |    |
| 5  | <b>472.276574</b>  | 236.641925 |                    |            | <b>454.266009</b>  | 227.636642 | I | <b>1249.620513</b> | <b>625.313895</b> | 1232.593964        | 616.800620  | 1231.609948       | 616.308612  | 11         |    |
| 6  | <b>529.298038</b>  | 265.152657 |                    |            | <b>511.287473</b>  | 256.147375 | G | <b>1136.536449</b> | 568.771863        | <b>1119.509900</b> | 560.258588  | 1118.525884       | 559.766580  | 10         |    |
| 7  | <b>642.382102</b>  | 321.694689 |                    |            | <b>624.371537</b>  | 312.689407 | L | <b>1079.514985</b> | 540.261131        | 1062.488436        | 531.747856  | 1061.504420       | 531.255848  | 9          |    |
| 8  | <b>771.424695</b>  | 386.215986 |                    |            | <b>753.414130</b>  | 377.210703 | E | <b>966.430921</b>  | 483.719099        | <b>949.404372</b>  | 475.205824  | <b>948.420356</b> | 474.713816  | 8          |    |
| 9  | <b>931.455344</b>  | 466.231310 |                    |            | 913.444779         | 457.226028 | C | <b>837.388328</b>  | 419.197802        | 820.361779         | 410.684528  | 819.377763        | 410.192520  | 7          |    |
| 10 | <b>1059.513922</b> | 530.260599 | 1042.487373        | 521.747325 | 1041.503357        | 521.255317 | Q | <b>677.357679</b>  | 339.182478        | 660.331130         | 330.669203  | 659.347114        | 330.177195  | 6          |    |
| 11 | <b>1146.545950</b> | 573.776613 | 1129.519401        | 565.263339 | <b>1128.535385</b> | 564.771331 | S | <b>549.299101</b>  | 275.153189        | 532.272552         | 266.639914  | 531.288536        | 266.147906  | 5          |    |
| 12 | <b>1245.614364</b> | 623.310820 | <b>1228.587815</b> | 614.797546 | <b>1227.603799</b> | 614.305538 | V | <b>462.267073</b>  | 231.637175        | 445.240524         | 223.123900  | <b>444.256508</b> | 222.631892  | 4          |    |
| 13 | <b>1346.662043</b> | 673.834660 | <b>1329.635494</b> | 665.321385 | <b>1328.651478</b> | 664.829377 | T | <b>363.198659</b>  | 182.102968        | 346.172110         | 173.589693  | 345.188094        | 173.097685  | 3          |    |
| 14 | <b>1433.694071</b> | 717.350674 | 1416.667522        | 708.837399 | <b>1415.683506</b> | 708.345391 | S | <b>262.150980</b>  | 131.579128        | 245.124431         | 123.065854  | 244.140415        | 122.573846  | 2          |    |
| 15 |                    |            |                    |            |                    |            | R | 175.118952         | 88.063114         | 158.092403         | 79.549839   |                   |             | 1          |    |

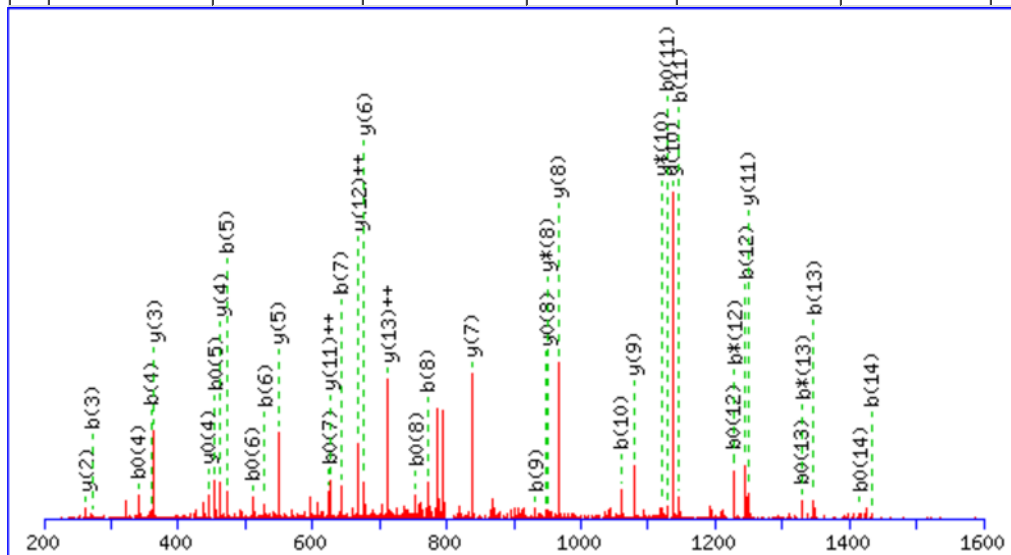

## Peptide View

MS/MS Fragmentation of **LCCQMCEPGTFLVK**Found in **IPI00002435**, Tax\_Id=9606 Gene\_Symbol=CD27 CD27 antigen**Experiment:** 52 - PyC-1 **Fraction:** PyC-1

Match to Query 13121: 1741.767048 from(871.890800,2+)

Title: OECHL100310\_23.15292.15292.2.dta

Data file \\BOROMIR\Masse\Data LTQ-Orbitrap\Chrystelle Lacroix\Etude clinique sJPU\OECHL100310\_23.raw

**Monoisotopic mass of neutral peptide Mr(calc):** 1741.766006**Fixed modifications:** Carbamidomethyl (C) (apply to specified residues or termini only)**Ions Score:** 72**Expect:** 4.4e-006**Matches :** 14/130 fragment ions using 15 most intense peaks ([help](#))

| #  | b                  | b <sup>++</sup> | b <sup>*</sup> | b <sup>*++</sup> | b <sup>0</sup> | b <sup>0++</sup> | Seq. | y                  | y <sup>++</sup>   | y <sup>*</sup> | y <sup>*++</sup> | y <sup>0</sup> | y <sup>0++</sup> | #  |
|----|--------------------|-----------------|----------------|------------------|----------------|------------------|------|--------------------|-------------------|----------------|------------------|----------------|------------------|----|
| 1  | 114.091340         | 57.549308       |                |                  |                |                  | L    |                    |                   |                |                  |                |                  | 14 |
| 2  | <b>274.121989</b>  | 137.564632      |                |                  |                |                  | C    | 1629.689206        | 815.348241        | 1612.662657    | 806.834967       | 1611.678641    | 806.342959       | 13 |
| 3  | <b>434.152638</b>  | 217.579957      |                |                  |                |                  | C    | <b>1469.658557</b> | <b>735.332917</b> | 1452.632008    | 726.819642       | 1451.647992    | 726.327634       | 12 |
| 4  | <b>562.211216</b>  | 281.609246      | 545.184667     | 273.095972       |                |                  | Q    | <b>1309.627908</b> | 655.317592        | 1292.601359    | 646.804318       | 1291.617343    | 646.312310       | 11 |
| 5  | 693.251701         | 347.129489      | 676.225152     | 338.616214       |                |                  | M    | <b>1181.569330</b> | 591.288303        | 1164.542781    | 582.775029       | 1163.558765    | 582.283021       | 10 |
| 6  | 853.282350         | 427.144813      | 836.255801     | 418.631539       |                |                  | C    | <b>1050.528845</b> | 525.768061        | 1033.502296    | 517.254786       | 1032.518280    | 516.762778       | 9  |
| 7  | <b>982.324943</b>  | 491.666110      | 965.298394     | 483.152835       | 964.314378     | 482.660827       | E    | <b>890.498196</b>  | 445.752736        | 873.471647     | 437.239462       | 872.487631     | 436.747454       | 8  |
| 8  | 1079.377707        | 540.192492      | 1062.351158    | 531.679217       | 1061.367142    | 531.187209       | P    | <b>761.455603</b>  | 381.231440        | 744.429054     | 372.718165       | 743.445038     | 372.226157       | 7  |
| 9  | 1136.399171        | 568.703224      | 1119.372622    | 560.189949       | 1118.388606    | 559.697941       | G    | 664.402839         | 332.705058        | 647.376290     | 324.191783       | 646.392274     | 323.699775       | 6  |
| 10 | 1237.446850        | 619.227063      | 1220.420301    | 610.713789       | 1219.436285    | 610.221781       | T    | 607.381375         | 304.194326        | 590.354826     | 295.681051       | 589.370810     | 295.189043       | 5  |
| 11 | <b>1384.515264</b> | 692.761270      | 1367.488715    | 684.247996       | 1366.504699    | 683.755988       | F    | <b>506.333696</b>  | 253.670486        | 489.307147     | 245.157212       |                |                  | 4  |
| 12 | 1497.599328        | 749.303302      | 1480.572779    | 740.790028       | 1479.588763    | 740.298020       | L    | 359.265282         | 180.136279        | 342.238733     | 171.623004       |                |                  | 3  |
| 13 | <b>1596.667742</b> | 798.837509      | 1579.641193    | 790.324235       | 1578.657177    | 789.832227       | V    | 246.181218         | 123.594247        | 229.154669     | 115.080973       |                |                  | 2  |
| 14 |                    |                 |                |                  |                |                  | K    | 147.112804         | 74.060040         | 130.086255     | 65.546765        |                |                  | 1  |

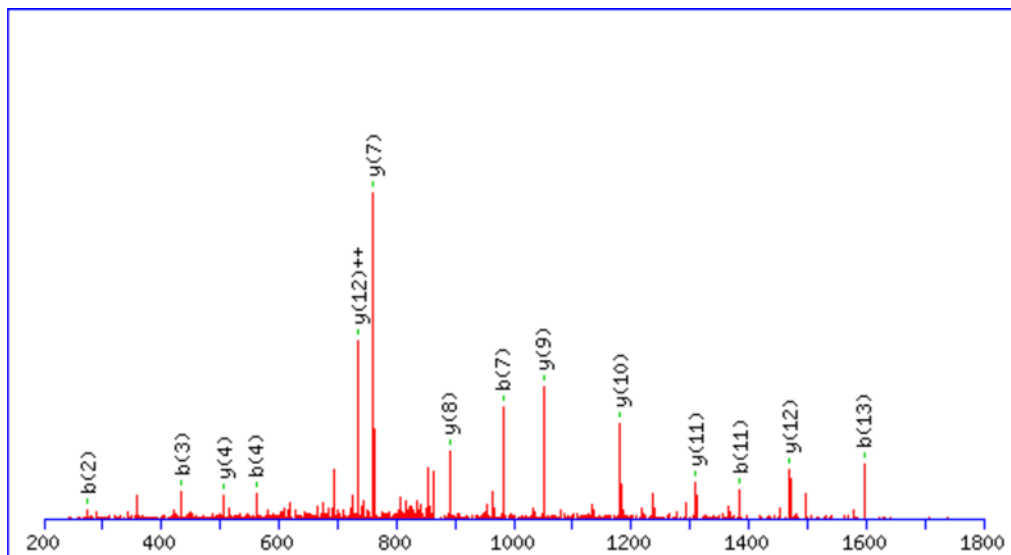

## Peptide View

MS/MS Fragmentation of **DTDTGALLFIGK**

Found in **IPI00006114**, Tax\_Id=9606 Gene\_Symbol=SERPINF1 Pigment epithelium-derived factor

**Experiment:** 52 - PyC-1 **Fraction:** PyC-1

Match to Query 7350: 1249.656248 from(625.835400,2+)

Title: OECHL100310\_23.17104.17104.2.dta

Data file \\BOROMIR\Masse\Data LTQ-Orbitrap\Chrystelle Lacroix\Etude clinique sJPU\OECHL100310\_23.raw

**Monoisotopic mass of neutral peptide Mr(calc):** 1249.655426 **Fixed modifications:** Carbamidomethyl (C) (apply to specified residues or termini only) **Ions Score:** 70

**Expect:** 8e-006 **Matches :** 21/94 fragment ions using 33 most intense peaks ([help](#))

| # | b                 | b <sup>++</sup>   | b <sup>0</sup>    | b <sup>0++</sup> | Seq.     | y                  | y <sup>++</sup> | y <sup>*</sup> | y <sup>*++</sup> | y <sup>0</sup> | y <sup>0++</sup> | #         |
|---|-------------------|-------------------|-------------------|------------------|----------|--------------------|-----------------|----------------|------------------|----------------|------------------|-----------|
| 1 | 116.034219        | 58.520748         | 98.023654         | 49.515465        | <b>D</b> |                    |                 |                |                  |                |                  | <b>12</b> |
| 2 | <b>217.081898</b> | 109.044587        | <b>199.071333</b> | 100.039304       | <b>T</b> | 1135.635753        | 568.321514      | 1118.609204    | 559.808240       | 1117.625188    | 559.316232       | <b>11</b> |
| 3 | 332.108841        | 166.558058        | 314.098276        | 157.552776       | <b>D</b> | <b>1034.588074</b> | 517.797675      | 1017.561525    | 509.284401       | 1016.577509    | 508.792393       | <b>10</b> |
| 4 | <b>433.156520</b> | <b>217.081898</b> | 415.145955        | 208.076616       | <b>T</b> | <b>919.561131</b>  | 460.284203      | 902.534582     | 451.770929       | 901.550566     | 451.278921       | <b>9</b>  |
| 5 | 490.177984        | 245.592630        | 472.167419        | 236.587347       | <b>G</b> | <b>818.513452</b>  | 409.760364      | 801.486903     | 401.247089       |                |                  | <b>8</b>  |
| 6 | <b>561.215098</b> | 281.111187        | 543.204533        | 272.105905       | <b>A</b> | <b>761.491988</b>  | 381.249632      | 744.465439     | 372.736357       |                |                  | <b>7</b>  |

|    |             |            |             |            |   |            |            |            |            |  |  |   |
|----|-------------|------------|-------------|------------|---|------------|------------|------------|------------|--|--|---|
| 7  | 674.299162  | 337.653219 | 656.288597  | 328.647937 | L | 690.454874 | 345.731075 | 673.428325 | 337.217800 |  |  | 6 |
| 8  | 787.383226  | 394.195251 | 769.372661  | 385.189969 | L | 577.370810 | 289.189043 | 560.344261 | 280.675768 |  |  | 5 |
| 9  | 934.451640  | 467.729458 | 916.441075  | 458.724176 | F | 464.286746 | 232.647011 | 447.260197 | 224.133736 |  |  | 4 |
| 10 | 1047.535704 | 524.271490 | 1029.525139 | 515.266207 | I | 317.218332 | 159.112804 | 300.191783 | 150.599529 |  |  | 3 |
| 11 | 1104.557168 | 552.782222 | 1086.546603 | 543.776939 | G | 204.134268 | 102.570772 | 187.107719 | 94.057497  |  |  | 2 |
| 12 |             |            |             |            | K | 147.112804 | 74.060040  | 130.086255 | 65.546765  |  |  | 1 |

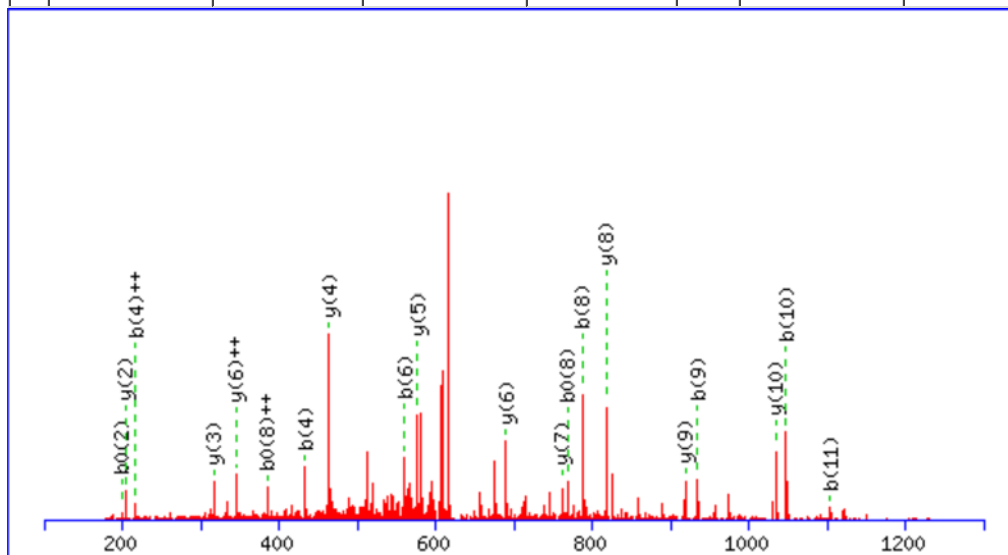

## Peptide View

MS/MS Fragmentation of **WADAECEEIPGR**

Found in **IP100027436**, Tax\_Id=9606 Gene\_Symbol=NGFR Tumor necrosis factor receptor superfamily member 16

Experiment: 52 - PyC-1 Fraction: PyC-1

Match to Query 9228: 1431.610248 from(716.812400,2+)

Title: OECHL100310\_23.10332.10332.2.dta

Data file \\BOROMIR\Masse\Data LTQ-Orbitrap\Chrystelle Lacroix\Etude clinique sJPU\OECHL100310\_23.raw

**Monoisotopic mass of neutral peptide Mr(calc):** 1431.608856 **Fixed modifications:** Carbamidomethyl (C) (apply to specified residues or termini only) **Ions Score:** 57

**Expect:** 5.4e-005 **Matches :** 20/98 fragment ions using 50 most intense peaks ([help](#))

| # | b | b <sup>++</sup> | b <sup>0</sup> | b <sup>0++</sup> | Seq. | y | y <sup>++</sup> | y* | y <sup>*++</sup> | y <sup>0</sup> | y <sup>0++</sup> | # |
|---|---|-----------------|----------------|------------------|------|---|-----------------|----|------------------|----------------|------------------|---|
|---|---|-----------------|----------------|------------------|------|---|-----------------|----|------------------|----------------|------------------|---|

|    |                    |            |                    |            |   |                    |                   |             |            |             |            |    |
|----|--------------------|------------|--------------------|------------|---|--------------------|-------------------|-------------|------------|-------------|------------|----|
| 1  | 187.086589         | 94.046932  |                    |            | W |                    |                   |             |            |             |            | 12 |
| 2  | <b>258.123703</b>  | 129.565490 |                    |            | A | <b>1246.536843</b> | 623.772060        | 1229.510294 | 615.258785 | 1228.526278 | 614.766777 | 11 |
| 3  | <b>373.150646</b>  | 187.078961 | 355.140081         | 178.073679 | D | <b>1175.499729</b> | <b>588.253502</b> | 1158.473180 | 579.740228 | 1157.489164 | 579.248220 | 10 |
| 4  | <b>444.187760</b>  | 222.597518 | 426.177195         | 213.592236 | A | 1060.472786        | 530.740031        | 1043.446237 | 522.226757 | 1042.462221 | 521.734749 | 9  |
| 5  | <b>573.230353</b>  | 287.118815 | 555.219788         | 278.113532 | E | <b>989.435672</b>  | 495.221474        | 972.409123  | 486.708199 | 971.425107  | 486.216191 | 8  |
| 6  | <b>733.261002</b>  | 367.134139 | 715.250437         | 358.128857 | C | <b>860.393079</b>  | 430.700178        | 843.366530  | 422.186903 | 842.382514  | 421.694895 | 7  |
| 7  | <b>862.303595</b>  | 431.655436 | 844.293030         | 422.650153 | E | <b>700.362430</b>  | 350.684853        | 683.335881  | 342.171578 | 682.351865  | 341.679570 | 6  |
| 8  | <b>991.346188</b>  | 496.176732 | 973.335623         | 487.171450 | E | <b>571.319837</b>  | 286.163556        | 554.293288  | 277.650282 | 553.309272  | 277.158274 | 5  |
| 9  | <b>1104.430252</b> | 552.718764 | <b>1086.419687</b> | 543.713482 | I | <b>442.277244</b>  | 221.642260        | 425.250695  | 213.128985 |             |            | 4  |
| 10 | <b>1201.483016</b> | 601.245146 | 1183.472451        | 592.239864 | P | <b>329.193180</b>  | 165.100228        | 312.166631  | 156.586953 |             |            | 3  |
| 11 | <b>1258.504480</b> | 629.755878 | 1240.493915        | 620.750596 | G | 232.140416         | 116.573846        | 215.113867  | 108.060571 |             |            | 2  |
| 12 |                    |            |                    |            | R | 175.118952         | 88.063114         | 158.092403  | 79.549839  |             |            | 1  |

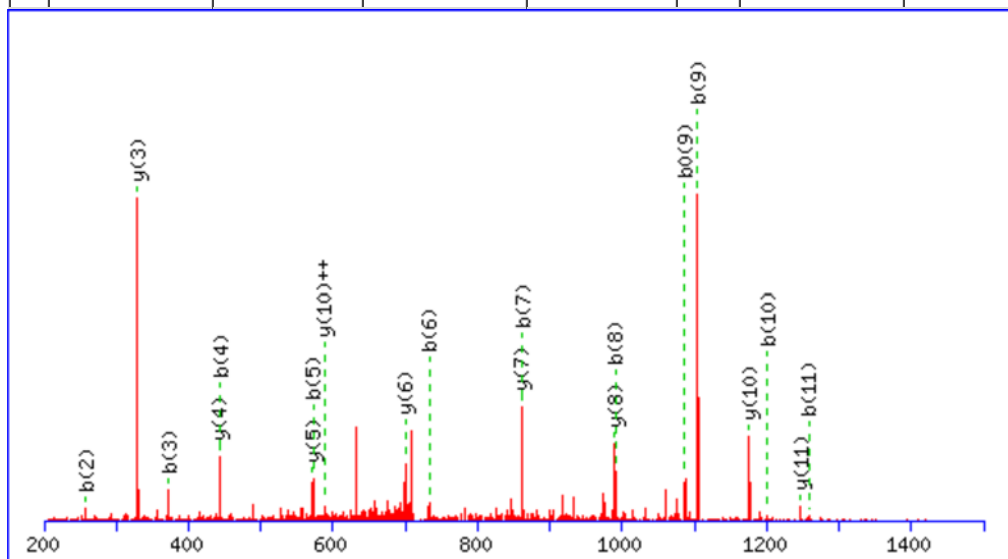

## Peptide View

MS/MS Fragmentation of **AVGLLTVISK**

Found in **IPI00013446**, Tax\_Id=9606 Gene\_Symbol=PSCA Prostate stem cell antigen

Experiment: 22 - NOPC1 Fraction: NOPC1

Match to Query 2694: 999.634248 from(500.824400,2+)

Title: OECHL100310\_21.17386.17386.2.dta

Data file \\BOROMIR\Masse\Data LTQ-Orbitrap\Chrystelle Lacroix\Etude clinique sJPU\OECHL100310\_21.raw

**Monoisotopic mass of neutral peptide Mr(calc):** 999.632828**Fixed modifications:** Carbamidomethyl (C) (apply to specified residues or termini only)**Ions Score:** 65**Expect:** 4e-006**Matches :** 14/78 fragment ions using 24 most intense peaks ([help](#))

| #  | b                 | b <sup>++</sup>   | b <sup>0</sup> | b <sup>0++</sup> | Seq. | y                 | y <sup>++</sup> | y*         | y <sup>*++</sup> | y <sup>0</sup> | y <sup>0++</sup> | #  |
|----|-------------------|-------------------|----------------|------------------|------|-------------------|-----------------|------------|------------------|----------------|------------------|----|
| 1  | 72.044390         | 36.525833         |                |                  | A    |                   |                 |            |                  |                |                  | 10 |
| 2  | <b>171.112804</b> | 86.060040         |                |                  | V    | 929.602995        | 465.305136      | 912.576446 | 456.791861       | 911.592430     | 456.299853       | 9  |
| 3  | <b>228.134268</b> | 114.570772        |                |                  | G    | <b>830.534581</b> | 415.770929      | 813.508032 | 407.257654       | 812.524016     | 406.765646       | 8  |
| 4  | <b>341.218332</b> | <b>171.112804</b> |                |                  | L    | 773.513117        | 387.260197      | 756.486568 | 378.746922       | 755.502552     | 378.254914       | 7  |
| 5  | <b>454.302396</b> | 227.654836        |                |                  | L    | <b>660.429053</b> | 330.718165      | 643.402504 | 322.204890       | 642.418488     | 321.712882       | 6  |
| 6  | <b>555.350075</b> | 278.178676        | 537.339510     | 269.173393       | T    | <b>547.344989</b> | 274.176133      | 530.318440 | 265.662858       | 529.334424     | 265.170850       | 5  |
| 7  | <b>654.418489</b> | 327.712883        | 636.407924     | 318.707600       | V    | 446.297310        | 223.652293      | 429.270761 | 215.139018       | 428.286745     | 214.647010       | 4  |
| 8  | <b>767.502553</b> | 384.254915        | 749.491988     | 375.249632       | I    | <b>347.228896</b> | 174.118086      | 330.202347 | 165.604811       | 329.218331     | 165.112803       | 3  |
| 9  | <b>854.534581</b> | 427.770929        | 836.524016     | 418.765646       | S    | <b>234.144832</b> | 117.576054      | 217.118283 | 109.062779       | 216.134267     | 108.570771       | 2  |
| 10 |                   |                   |                |                  | K    | 147.112804        | 74.060040       | 130.086255 | 65.546765        |                |                  | 1  |

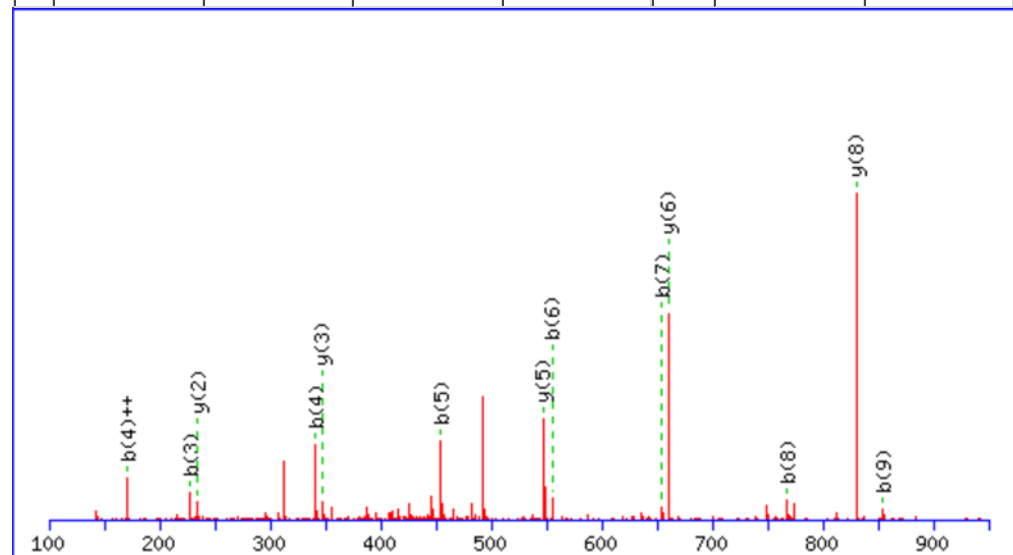

## Peptide View

MS/MS Fragmentation of **SRCPDGSTCCELPSGK**Found in **IPI00182138**, Tax\_Id=9606 Gene\_Symbol=GRN Isoform 2 of Granulins**Experiment:** 22 - NOPC1 **Fraction:** NOPC1

Match to Query 11970: 1809.745048 from(905.879800,2+)

Title: OECHL100310\_21.5076.5076.2.dta

Data file \\BOROMIR\Masse\Data LTQ-Orbitrap\Chrystelle Lacroix\Etude clinique sJPU\OECHL100310\_21.raw

**Monoisotopic mass of neutral peptide Mr(calc):** 1809.744415 **Fixed modifications:** Carbamidomethyl (C) (apply to specified residues or termini only) **Ions Score:** 63**Expect:** 1.5e-005 **Matches :** 44/174 fragment ions using 94 most intense peaks ([help](#))

| #  | b                  | b <sup>++</sup>   | b*                 | b <sup>*++</sup>  | b <sup>0</sup>     | b <sup>0++</sup>  | Seq. | y                  | y <sup>++</sup>   | y*          | y <sup>*++</sup> | y <sup>0</sup>     | y <sup>0++</sup> | #  |
|----|--------------------|-------------------|--------------------|-------------------|--------------------|-------------------|------|--------------------|-------------------|-------------|------------------|--------------------|------------------|----|
| 1  | 88.039304          | 44.523290         |                    |                   | 70.028739          | 35.518008         | S    |                    |                   |             |                  |                    |                  | 16 |
| 2  | 244.140415         | 122.573845        | 227.113866         | 114.060571        | 226.129850         | 113.568563        | R    | 1723.719653        | 862.363465        | 1706.693104 | 853.850190       | 1705.709088        | 853.358182       | 15 |
| 3  | <b>404.171064</b>  | 202.589170        | 387.144515         | 194.075896        | 386.160499         | 193.583888        | C    | <b>1567.618542</b> | 784.312909        | 1550.591993 | 775.799635       | 1549.607977        | 775.307627       | 14 |
| 4  | <b>501.223828</b>  | 251.115552        | 484.197279         | 242.602277        | <b>483.213263</b>  | 242.110269        | P    | <b>1407.587893</b> | <b>704.297585</b> | 1390.561344 | 695.784310       | 1389.577328        | 695.292302       | 13 |
| 5  | <b>616.250771</b>  | 308.629024        | 599.224222         | 300.115749        | 598.240206         | 299.623741        | D    | <b>1310.535129</b> | <b>655.771203</b> | 1293.508580 | 647.257928       | <b>1292.524564</b> | 646.765920       | 12 |
| 6  | <b>673.272235</b>  | 337.139756        | <b>656.245686</b>  | 328.626481        | 655.261670         | 328.134473        | G    | <b>1195.508186</b> | 598.257731        | 1178.481637 | 589.744457       | <b>1177.497621</b> | 589.252449       | 11 |
| 7  | <b>760.304263</b>  | 380.655770        | 743.277714         | 372.142495        | 742.293698         | 371.650487        | S    | <b>1138.486722</b> | 569.746999        | 1121.460173 | 561.233725       | 1120.476157        | 560.741717       | 10 |
| 8  | <b>861.351942</b>  | 431.179609        | 844.325393         | 422.666335        | 843.341377         | 422.174327        | T    | <b>1051.454694</b> | 526.230985        | 1034.428145 | 517.717711       | <b>1033.444129</b> | 517.225703       | 9  |
| 9  | <b>1021.382591</b> | 511.194934        | 1004.356042        | <b>502.681659</b> | 1003.372026        | <b>502.189651</b> | C    | 950.407015         | 475.707146        | 933.380466  | 467.193871       | 932.396450         | 466.701863       | 8  |
| 10 | <b>1181.413240</b> | 591.210258        | 1164.386691        | 582.696984        | 1163.402675        | 582.204976        | C    | <b>790.376366</b>  | 395.691821        | 773.349817  | 387.178547       | 772.365801         | 386.686539       | 7  |
| 11 | <b>1310.455833</b> | <b>655.731555</b> | 1293.429284        | 647.218280        | <b>1292.445268</b> | 646.726272        | E    | <b>630.345717</b>  | 315.676497        | 613.319168  | 307.163222       | 612.335152         | 306.671214       | 6  |
| 12 | <b>1423.539897</b> | <b>712.273587</b> | 1406.513348        | <b>703.760312</b> | 1405.529332        | <b>703.268304</b> | L    | <b>501.303124</b>  | 251.155200        | 484.276575  | 242.641925       | <b>483.292559</b>  | 242.149917       | 5  |
| 13 | <b>1520.592661</b> | <b>760.799969</b> | 1503.566112        | 752.286694        | 1502.582096        | 751.794686        | P    | <b>388.219060</b>  | 194.613168        | 371.192511  | 186.099894       | <b>370.208495</b>  | 185.607886       | 4  |
| 14 | <b>1607.624689</b> | 804.315983        | <b>1590.598140</b> | <b>795.802708</b> | 1589.614124        | <b>795.310700</b> | S    | <b>291.166296</b>  | 146.086786        | 274.139747  | 137.573512       | 273.155731         | 137.081504       | 3  |
| 15 | <b>1664.646153</b> | 832.826715        | 1647.619604        | 824.313440        | 1646.635588        | 823.821432        | G    | 204.134268         | 102.570772        | 187.107719  | 94.057497        |                    |                  | 2  |
| 16 |                    |                   |                    |                   |                    |                   | K    | 147.112804         | 74.060040         | 130.086255  | 65.546765        |                    |                  | 1  |



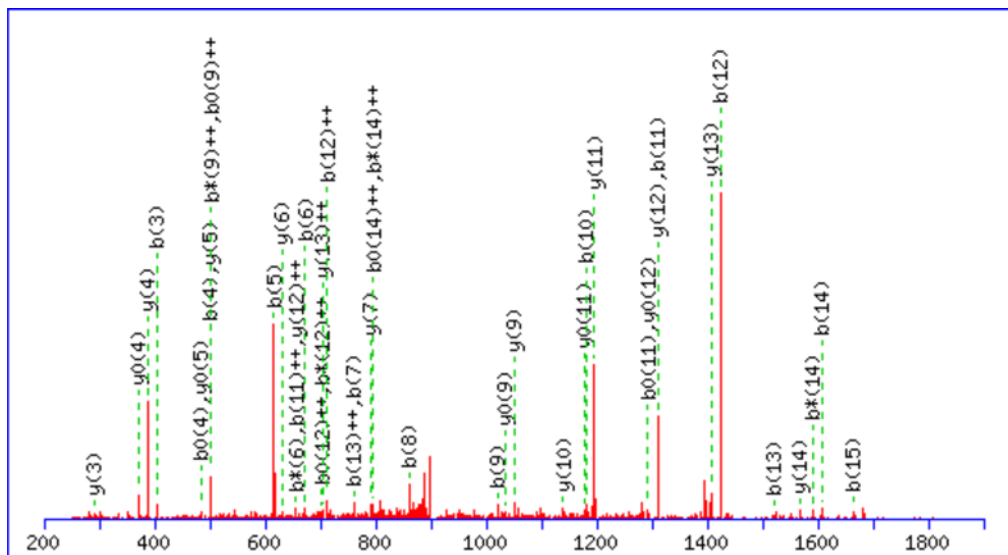

## Peptide View

### MS/MS Fragmentation of **KAGPCEQAGSPCR**

Found in **IP100028381**, Tax\_Id=9606 Gene\_Symbol=DLK2 Isoform 1 of Protein delta homolog 2

**Experiment:** 22 - NOPC1 **Fraction:** NOPC1

Match to Query 7898: 1416.624648 from(709.319600,2+)

Title: OECHL100310\_21.2090.2090.2.dta

Data file \\BOROMIR\Masse\Data LTQ-Orbitrap\Chrystelle Lacroix\Etude clinique sJPU\OECHL100310\_21.raw

**Monoisotopic mass of neutral peptide Mr(calc):** 1416.623810 **Fixed modifications:** Carbamidomethyl (C) (apply to specified residues or termini only) **Ions Score:** 87

**Expect:** 1.1e-007 **Matches :** 20/128 fragment ions using 36 most intense peaks ([help](#))

| # | b          | b <sup>++</sup> | b <sup>*</sup> | b <sup>*++</sup> | b <sup>0</sup> | b <sup>0++</sup> | Seq.     | y                  | y <sup>++</sup>   | y <sup>*</sup> | y <sup>*++</sup>  | y <sup>0</sup> | y <sup>0++</sup> | #         |
|---|------------|-----------------|----------------|------------------|----------------|------------------|----------|--------------------|-------------------|----------------|-------------------|----------------|------------------|-----------|
| 1 | 129.102239 | 65.054757       | 112.075690     | 56.541483        |                |                  | <b>K</b> |                    |                   |                |                   |                |                  | <b>13</b> |
| 2 | 200.139353 | 100.573315      | 183.112804     | 92.060040        |                |                  | <b>A</b> | <b>1289.536133</b> | <b>645.271705</b> | 1272.509584    | 636.758430        | 1271.525568    | 636.266422       | <b>12</b> |
| 3 | 257.160817 | 129.084047      | 240.134268     | 120.570772       |                |                  | <b>G</b> | <b>1218.499019</b> | <b>609.753148</b> | 1201.472470    | 601.239873        | 1200.488454    | 600.747865       | <b>11</b> |
| 4 | 354.213581 | 177.610429      | 337.187032     | 169.097154       |                |                  | <b>P</b> | <b>1161.477555</b> | <b>581.242416</b> | 1144.451006    | 572.729141        | 1143.466990    | 572.237133       | <b>10</b> |
| 5 | 514.244230 | 257.625753      | 497.217681     | 249.112479       |                |                  | <b>C</b> | <b>1064.424791</b> | 532.716034        | 1047.398242    | 524.202759        | 1046.414226    | 523.710751       | <b>9</b>  |
| 6 | 643.286823 | 322.147050      | 626.260274     | 313.633775       | 625.276258     | 313.141767       | <b>E</b> | <b>904.394142</b>  | 452.700709        | 887.367593     | <b>444.187434</b> | 886.383577     | 443.695427       | <b>8</b>  |

|    |             |            |             |            |             |            |   |            |            |            |            |            |            |   |
|----|-------------|------------|-------------|------------|-------------|------------|---|------------|------------|------------|------------|------------|------------|---|
| 7  | 771.345401  | 386.176339 | 754.318852  | 377.663064 | 753.334836  | 377.171056 | Q | 775.351549 | 388.179413 | 758.325000 | 379.666138 | 757.340984 | 379.174130 | 7 |
| 8  | 842.382515  | 421.694896 | 825.355966  | 413.181621 | 824.371950  | 412.689613 | A | 647.292971 | 324.150124 | 630.266422 | 315.636849 | 629.282406 | 315.144841 | 6 |
| 9  | 899.403979  | 450.205628 | 882.377430  | 441.692353 | 881.393414  | 441.200345 | G | 576.255857 | 288.631567 | 559.229308 | 280.118292 | 558.245292 | 279.626284 | 5 |
| 10 | 986.436007  | 493.721642 | 969.409458  | 485.208367 | 968.425442  | 484.716359 | S | 519.234393 | 260.120835 | 502.207844 | 251.607560 | 501.223828 | 251.115552 | 4 |
| 11 | 1083.488771 | 542.248024 | 1066.462222 | 533.734749 | 1065.478206 | 533.242741 | P | 432.202365 | 216.604820 | 415.175816 | 208.091546 |            |            | 3 |
| 12 | 1243.519420 | 622.263348 | 1226.492871 | 613.750074 | 1225.508855 | 613.258066 | C | 335.149601 | 168.078438 | 318.123052 | 159.565164 |            |            | 2 |
| 13 |             |            |             |            |             |            | R | 175.118952 | 88.063114  | 158.092403 | 79.549839  |            |            | 1 |

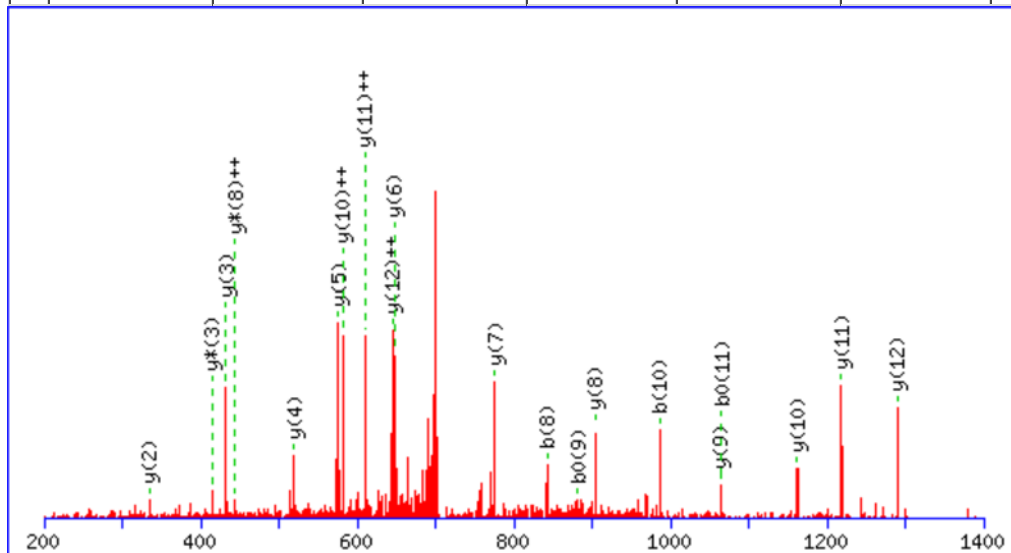

## Peptide View

MS/MS Fragmentation of **LLIYDASNLETGVPSR**

Found in **IPI00003111**, Tax\_Id=9606 Gene\_Symbol=LOC652694 Ig kappa chain V-I region AU

**Experiment:** 22 - NOPC1 **Fraction:** NOPC1

Match to Query 11389: 1746.917248 from(874.465900,2+)

Title: OECHL100310\_21.17095.17095.2.dta

Data file \\BOROMIR\Masse\Data LTQ-Orbitrap\Chrystelle Lacroix\Etude clinique sJPU\OECHL100310\_21.raw

**Monoisotopic mass of neutral peptide Mr(calc):** 1746.915192 **Fixed modifications:** Carbamidomethyl (C) (apply to specified residues or termini only) **Ions Score:** 78

**Expect:** 1.8e-006 **Matches :** 27/156 fragment ions using 45 most intense peaks ([help](#))

| #  | <b>b</b>           | <b>b<sup>++</sup></b> | <b>b<sup>*</sup></b> | <b>b<sup>*++</sup></b> | <b>b<sup>0</sup></b> | <b>b<sup>0++</sup></b> | Seq.     | <b>y</b>           | <b>y<sup>++</sup></b> | <b>y<sup>*</sup></b> | <b>y<sup>*++</sup></b> | <b>y<sup>0</sup></b> | <b>y<sup>0++</sup></b> | #         |
|----|--------------------|-----------------------|----------------------|------------------------|----------------------|------------------------|----------|--------------------|-----------------------|----------------------|------------------------|----------------------|------------------------|-----------|
| 1  | 114.091340         | 57.549308             |                      |                        |                      |                        | <b>L</b> |                    |                       |                      |                        |                      |                        | <b>16</b> |
| 2  | 227.175404         | 114.091340            |                      |                        |                      |                        | <b>L</b> | 1634.838427        | 817.922852            | 1617.811878          | 809.409577             | 1616.827862          | 808.917569             | <b>15</b> |
| 3  | <b>340.259468</b>  | 170.633372            |                      |                        |                      |                        | <b>I</b> | <b>1521.754363</b> | 761.380820            | 1504.727814          | 752.867545             | 1503.743798          | 752.375537             | <b>14</b> |
| 4  | 503.322797         | 252.165036            |                      |                        |                      |                        | <b>Y</b> | 1408.670299        | <b>704.838788</b>     | 1391.643750          | 696.325513             | <b>1390.659734</b>   | 695.833505             | <b>13</b> |
| 5  | <b>618.349740</b>  | 309.678508            |                      |                        | 600.339175           | 300.673226             | <b>D</b> | <b>1245.606970</b> | 623.307123            | 1228.580421          | 614.793849             | 1227.596405          | 614.301841             | <b>12</b> |
| 6  | 689.386854         | 345.197065            |                      |                        | 671.376289           | 336.191782             | <b>A</b> | 1130.580027        | 565.793652            | 1113.553478          | 557.280377             | 1112.569462          | 556.788369             | <b>11</b> |
| 7  | 776.418882         | 388.713079            |                      |                        | 758.408317           | 379.707796             | <b>S</b> | <b>1059.542913</b> | 530.275095            | 1042.516364          | 521.761820             | 1041.532348          | 521.269812             | <b>10</b> |
| 8  | 890.461809         | 445.734542            | 873.435260           | 437.221268             | 872.451244           | 436.729260             | <b>N</b> | <b>972.510885</b>  | 486.759081            | 955.484336           | 478.245806             | 954.500320           | 477.753798             | <b>9</b>  |
| 9  | <b>1003.545873</b> | 502.276574            | 986.519324           | 493.763300             | 985.535308           | 493.271292             | <b>L</b> | <b>858.467958</b>  | 429.737617            | <b>841.441409</b>    | 421.224343             | 840.457393           | 420.732335             | <b>8</b>  |
| 10 | <b>1132.588466</b> | 566.797871            | 1115.561917          | 558.284597             | 1114.577901          | 557.792588             | <b>E</b> | <b>745.383894</b>  | <b>373.195585</b>     | 728.357345           | 364.682311             | 727.373329           | 364.190303             | <b>7</b>  |
| 11 | <b>1233.636145</b> | <b>617.321710</b>     | 1216.609596          | 608.808436             | 1215.625580          | 608.316428             | <b>T</b> | <b>616.341301</b>  | 308.674289            | 599.314752           | 300.161014             | 598.330736           | 299.669006             | <b>6</b>  |
| 12 | <b>1290.657609</b> | 645.832442            | 1273.631060          | 637.319168             | 1272.647044          | 636.827160             | <b>G</b> | <b>515.293622</b>  | 258.150449            | 498.267073           | 249.637175             | 497.283057           | 249.145167             | <b>5</b>  |
| 13 | <b>1389.726023</b> | 695.366649            | <b>1372.699474</b>   | 686.853375             | 1371.715458          | 686.361367             | <b>V</b> | <b>458.272158</b>  | 229.639717            | 441.245609           | 221.126443             | 440.261593           | 220.634435             | <b>4</b>  |
| 14 | <b>1486.778787</b> | 743.893032            | 1469.752238          | 735.379757             | 1468.768222          | 734.887749             | <b>P</b> | <b>359.203744</b>  | 180.105510            | 342.177195           | 171.592236             | <b>341.193179</b>    | 171.100228             | <b>3</b>  |
| 15 | <b>1573.810815</b> | 787.409046            | 1556.784266          | 778.895771             | <b>1555.800250</b>   | 778.403763             | <b>S</b> | 262.150980         | 131.579128            | 245.124431           | 123.065854             | 244.140415           | 122.573846             | <b>2</b>  |
| 16 |                    |                       |                      |                        |                      |                        | <b>R</b> | 175.118952         | 88.063114             | 158.092403           | 79.549839              |                      |                        | <b>1</b>  |

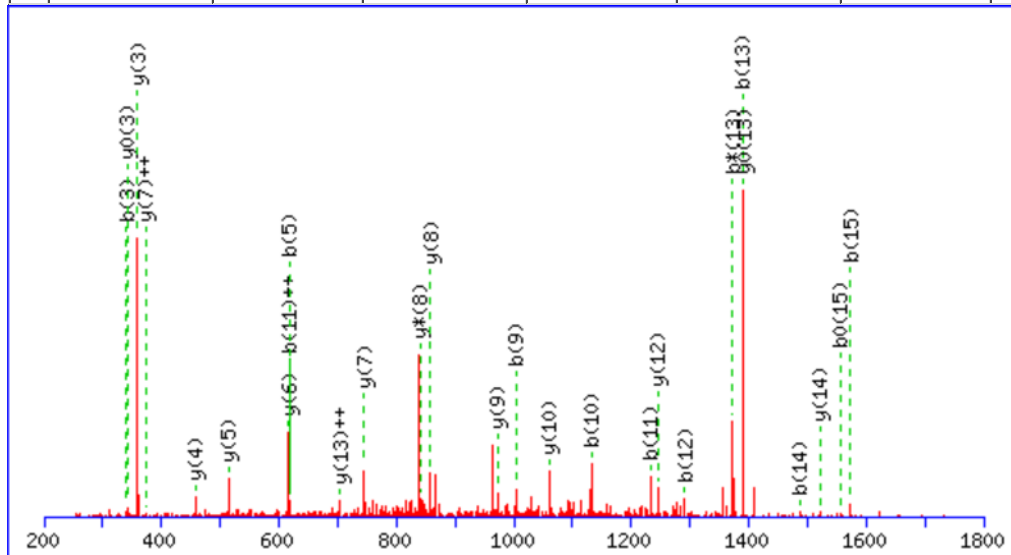

## Peptide View

MS/MS Fragmentation of **TGAVYVAEIGAK**

Found in **IPI00552937**, Tax\_Id=9606 Gene\_Symbol=NHLRC3 NHL repeat-containing protein 3

**Experiment:** 22 - NOPC1 **Fraction:** NOPC1

Match to Query 4972: 1177.632848 from(589.823700,2+)

Title: OECHL100310\_21.11361.11361.2.dta

Data file \\BOROMIR\Masse\Data LTQ-Orbitrap\Chrystelle Lacroix\Etude clinique sJPU\OECHL100310\_21.raw

**Monoisotopic mass of neutral peptide Mr(calc):** 1177.634277 **Fixed modifications:** Carbamidomethyl (C) (apply to specified residues or termini only) **Ions Score:** 64

**Expect:** 2.9e-005 **Matches :** 18/102 fragment ions using 30 most intense peaks ([help](#))

| #  | b                  | b <sup>++</sup>   | b <sup>0</sup>    | b <sup>0++</sup> | Seq.     | y                  | y <sup>++</sup> | y*          | y <sup>*++</sup> | y <sup>0</sup> | y <sup>0++</sup> | #         |
|----|--------------------|-------------------|-------------------|------------------|----------|--------------------|-----------------|-------------|------------------|----------------|------------------|-----------|
| 1  | 102.054955         | 51.531116         | 84.044390         | 42.525833        | <b>T</b> |                    |                 |             |                  |                |                  | <b>12</b> |
| 2  | 159.076419         | 80.041847         | 141.065854        | 71.036565        | <b>G</b> | <b>1077.593888</b> | 539.300582      | 1060.567339 | 530.787308       | 1059.583323    | 530.295300       | <b>11</b> |
| 3  | <b>230.113533</b>  | 115.560404        | 212.102968        | 106.555122       | <b>A</b> | <b>1020.572424</b> | 510.789850      | 1003.545875 | 502.276576       | 1002.561859    | 501.784568       | <b>10</b> |
| 4  | <b>329.181947</b>  | 165.094611        | 311.171382        | 156.089329       | <b>V</b> | <b>949.535310</b>  | 475.271293      | 932.508761  | 466.758019       | 931.524745     | 466.266011       | <b>9</b>  |
| 5  | <b>492.245276</b>  | 246.626276        | 474.234711        | 237.620994       | <b>Y</b> | <b>850.466896</b>  | 425.737086      | 833.440347  | 417.223812       | 832.456331     | 416.731804       | <b>8</b>  |
| 6  | 591.313690         | 296.160483        | <b>573.303125</b> | 287.155201       | <b>V</b> | <b>687.403567</b>  | 344.205422      | 670.377018  | 335.692147       | 669.393002     | 335.200139       | <b>7</b>  |
| 7  | <b>662.350804</b>  | 331.679040        | 644.340239        | 322.673758       | <b>A</b> | 588.335153         | 294.671215      | 571.308604  | 286.157940       | 570.324588     | 285.665932       | <b>6</b>  |
| 8  | <b>791.393397</b>  | 396.200337        | 773.382832        | 387.195054       | <b>E</b> | <b>517.298039</b>  | 259.152658      | 500.271490  | 250.639383       | 499.287474     | 250.147375       | <b>5</b>  |
| 9  | <b>904.477461</b>  | 452.742369        | 886.466896        | 443.737086       | <b>I</b> | <b>388.255446</b>  | 194.631361      | 371.228897  | 186.118087       |                |                  | <b>4</b>  |
| 10 | <b>961.498925</b>  | 481.253101        | 943.488360        | 472.247818       | <b>G</b> | <b>275.171382</b>  | 138.089329      | 258.144833  | 129.576055       |                |                  | <b>3</b>  |
| 11 | <b>1032.536039</b> | <b>516.771658</b> | 1014.525474       | 507.766375       | <b>A</b> | 218.149918         | 109.578597      | 201.123369  | 101.065322       |                |                  | <b>2</b>  |
| 12 |                    |                   |                   |                  | <b>K</b> | 147.112804         | 74.060040       | 130.086255  | 65.546765        |                |                  | <b>1</b>  |

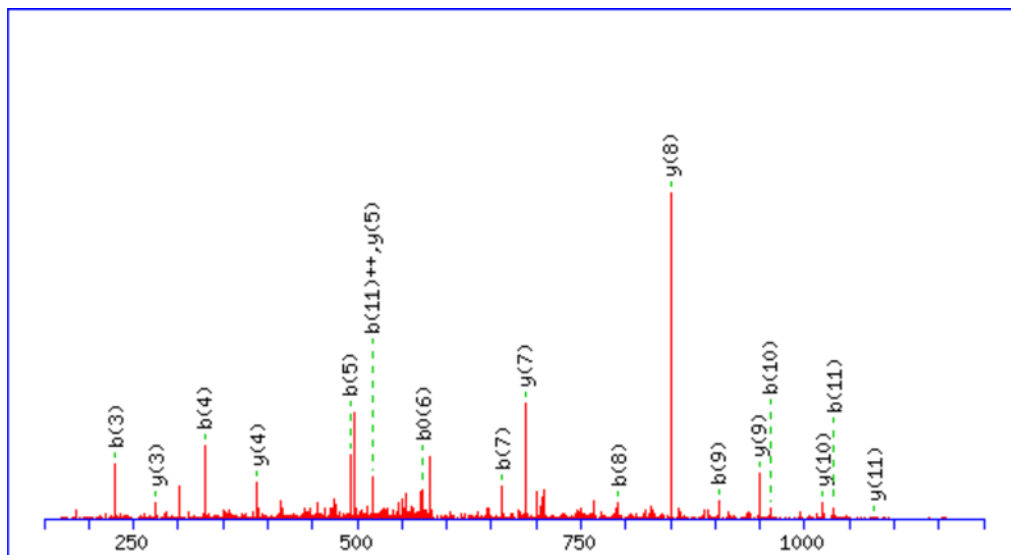

## Peptide View

### MS/MS Fragmentation of **LEDLENQLANQK**

Found in **IPI00012325**, Tax\_Id=9606 Gene\_Symbol=MATN4 matrilin 4 isoform 3 precursor

**Experiment:** 22 - NOPC1 **Fraction:** NOPC1

Match to Query 7872: 1413.709248 from(707.861900,2+)

Title: OECHL100310\_21.11795.11795.2.dta

Data file \\BOROMIR\Masse\Data LTQ-Orbitrap\Chrystelle Lacroix\Etude clinique sJPU\OECHL100310\_21.raw

**Monoisotopic mass of neutral peptide Mr(calc):** 1413.709930 **Fixed modifications:** Carbamidomethyl (C) (apply to specified residues or termini only) **Ions Score:** 62

**Expect:** 7.2e-005 **Matches :** 17/106 fragment ions using 25 most intense peaks ([help](#))

| # | b                 | b <sup>++</sup> | b*         | b* <sup>++</sup> | b <sup>0</sup> | b <sup>0++</sup> | Seq.     | y                  | y <sup>++</sup> | y*          | y* <sup>++</sup> | y <sup>0</sup> | y <sup>0++</sup> | #         |
|---|-------------------|-----------------|------------|------------------|----------------|------------------|----------|--------------------|-----------------|-------------|------------------|----------------|------------------|-----------|
| 1 | 114.091340        | 57.549308       |            |                  |                |                  | <b>L</b> |                    |                 |             |                  |                |                  | <b>12</b> |
| 2 | <b>243.133933</b> | 122.070605      |            |                  | 225.123368     | 113.065322       | <b>E</b> | 1301.633185        | 651.320231      | 1284.606636 | 642.806956       | 1283.622620    | 642.314948       | <b>11</b> |
| 3 | <b>358.160876</b> | 179.584076      |            |                  | 340.150311     | 170.578794       | <b>D</b> | <b>1172.590592</b> | 586.798934      | 1155.564043 | 578.285660       | 1154.580027    | 577.793652       | <b>10</b> |
| 4 | 471.244940        | 236.126108      |            |                  | 453.234375     | 227.120826       | <b>L</b> | 1057.563649        | 529.285462      | 1040.537100 | 520.772188       | 1039.553084    | 520.280180       | <b>9</b>  |
| 5 | <b>600.287533</b> | 300.647405      |            |                  | 582.276968     | 291.642122       | <b>E</b> | <b>944.479585</b>  | 472.743431      | 927.453036  | 464.230156       | 926.469020     | 463.738148       | <b>8</b>  |
| 6 | 714.330460        | 357.668868      | 697.303911 | 349.155594       | 696.319895     | 348.663586       | <b>N</b> | <b>815.436992</b>  | 408.222134      | 798.410443  | 399.708859       |                |                  | <b>7</b>  |

|    |                    |            |                    |            |             |            |   |                   |            |                   |            |  |  |   |
|----|--------------------|------------|--------------------|------------|-------------|------------|---|-------------------|------------|-------------------|------------|--|--|---|
| 7  | <b>842.389038</b>  | 421.698157 | 825.362489         | 413.184883 | 824.378473  | 412.692875 | Q | 701.394065        | 351.200671 | 684.367516        | 342.687396 |  |  | 6 |
| 8  | <b>955.473102</b>  | 478.240189 | 938.446553         | 469.726915 | 937.462537  | 469.234907 | L | <b>573.335487</b> | 287.171382 | 556.308938        | 278.658107 |  |  | 5 |
| 9  | <b>1026.510216</b> | 513.758746 | <b>1009.483667</b> | 505.245472 | 1008.499651 | 504.753464 | A | <b>460.251423</b> | 230.629349 | 443.224874        | 222.116075 |  |  | 4 |
| 10 | 1140.553143        | 570.780210 | 1123.526594        | 562.266935 | 1122.542578 | 561.774927 | N | <b>389.214309</b> | 195.110792 | <b>372.187760</b> | 186.597518 |  |  | 3 |
| 11 | <b>1268.611721</b> | 634.809499 | <b>1251.585172</b> | 626.296224 | 1250.601156 | 625.804216 | Q | <b>275.171382</b> | 138.089329 | 258.144833        | 129.576054 |  |  | 2 |
| 12 |                    |            |                    |            |             |            | K | 147.112804        | 74.060040  | 130.086255        | 65.546765  |  |  | 1 |

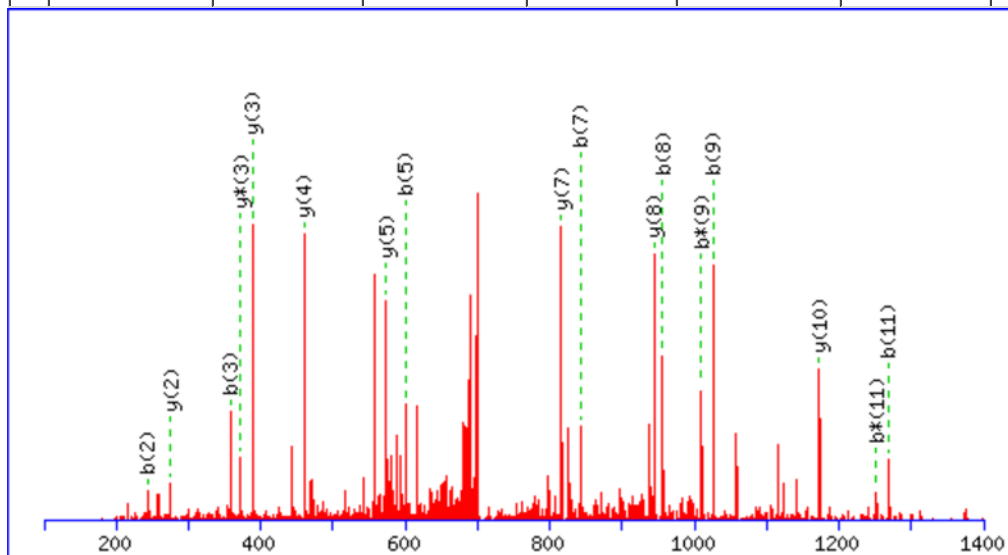

## Peptide View

MS/MS Fragmentation of **SFCDLTDEWR**

Found in **IPI00010193**, Tax\_Id=9606 Gene\_Symbol=IFNAR2 Isoform 1 of Interferon-alpha/beta receptor beta chain

**Experiment:** 22 - NOPC1 **Fraction:** NOPC1

Match to Query 7166: 1327.551648 from(664.783100,2+)

Title: OECHL100310\_21.17075.17075.2.dta

Data file \\BOROMIR\Masse\Data LTQ-Orbitrap\Chrystelle Lacroix\Etude clinique sJPU\OECHL100310\_21.raw

**Monoisotopic mass of neutral peptide Mr(calc):** 1327.550308 **Fixed modifications:** Carbamidomethyl (C) (apply to specified residues or termini only) **Ions Score:** 59

**Expect:** 3.1e-005 **Matches :** 12/86 fragment ions using 12 most intense peaks ([help](#))

| # | b | b <sup>++</sup> | b <sup>0</sup> | b <sup>0++</sup> | Seq. | y | y <sup>++</sup> | y* | y <sup>*++</sup> | y <sup>0</sup> | y <sup>0++</sup> | # |
|---|---|-----------------|----------------|------------------|------|---|-----------------|----|------------------|----------------|------------------|---|
|---|---|-----------------|----------------|------------------|------|---|-----------------|----|------------------|----------------|------------------|---|

|    |                    |            |                   |            |   |                    |                   |             |            |             |            |    |
|----|--------------------|------------|-------------------|------------|---|--------------------|-------------------|-------------|------------|-------------|------------|----|
| 1  | 88.039304          | 44.523290  | 70.028739         | 35.518008  | S |                    |                   |             |            |             |            | 10 |
| 2  | <b>235.107718</b>  | 118.057497 | 217.097153        | 109.052214 | F | 1241.525550        | 621.266413        | 1224.499001 | 612.753138 | 1223.514985 | 612.261130 | 9  |
| 3  | 395.138367         | 198.072821 | 377.127802        | 189.067539 | C | <b>1094.457136</b> | <b>547.732206</b> | 1077.430587 | 539.218932 | 1076.446571 | 538.726924 | 8  |
| 4  | 510.165310         | 255.586293 | 492.154745        | 246.581010 | D | <b>934.426487</b>  | 467.716882        | 917.399938  | 459.203607 | 916.415922  | 458.711599 | 7  |
| 5  | 623.249374         | 312.128325 | <b>605.238809</b> | 303.123043 | L | <b>819.399544</b>  | 410.203410        | 802.372995  | 401.690135 | 801.388979  | 401.198127 | 6  |
| 6  | 724.297053         | 362.652165 | <b>706.286488</b> | 353.646882 | T | <b>706.315480</b>  | 353.661378        | 689.288931  | 345.148103 | 688.304915  | 344.656095 | 5  |
| 7  | 839.323996         | 420.165636 | 821.313431        | 411.160353 | D | <b>605.267801</b>  | 303.137539        | 588.241252  | 294.624264 | 587.257236  | 294.132256 | 4  |
| 8  | 968.366589         | 484.686933 | 950.356024        | 475.681650 | E | <b>490.240858</b>  | 245.624067        | 473.214309  | 237.110792 | 472.230293  | 236.618784 | 3  |
| 9  | <b>1154.445902</b> | 577.726589 | 1136.435337       | 568.721306 | W | <b>361.198265</b>  | 181.102770        | 344.171716  | 172.589496 |             |            | 2  |
| 10 |                    |            |                   |            | R | 175.118952         | 88.063114         | 158.092403  | 79.549839  |             |            | 1  |

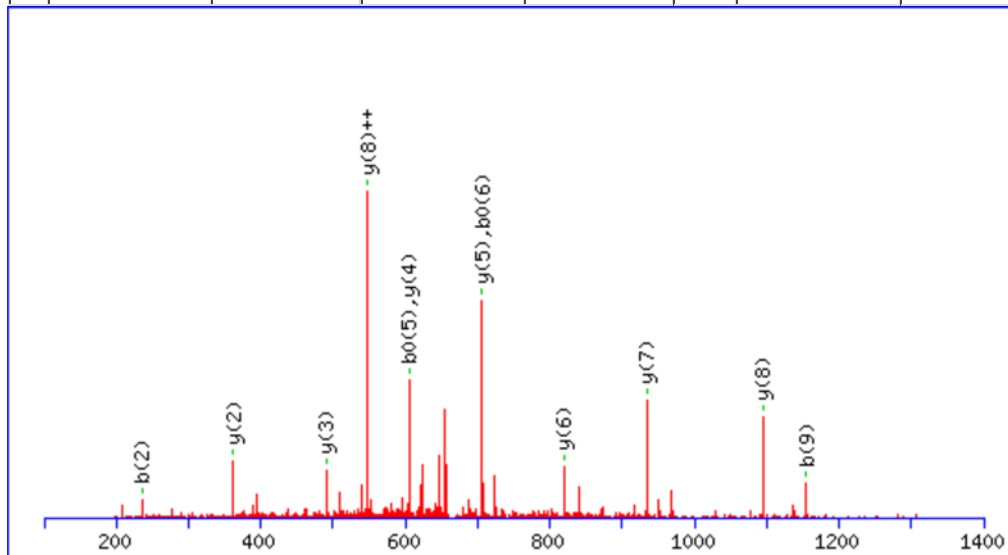

## Peptide View

MS/MS Fragmentation of **RGVSQAPTAAR**

Found in **IP100025365**, Tax\_Id=9606 Gene\_Symbol=EDN3 Isoform Long of Endothelin-3

**Experiment:** 22 - NOPC1 **Fraction:** NOPC1

Match to Query 4118: 1112.605248 from(557.309900,2+)

Title: OECHL100310\_21.2225.2225.2.dta

Data file \\BOROMIR\Masse\Data LTQ-Orbitrap\Chrystelle Lacroix\Etude clinique sJPU\OECHL100310\_21.raw

**Monoisotopic mass of neutral peptide Mr(calc):** 1112.605042**Fixed modifications:** Carbamidomethyl (C) (apply to specified residues or termini only)**Ions Score:** 56**Expect:** 0.00021**Matches :** 36/108 fragment ions using 55 most intense peaks ([help](#))

| #  | b          | b <sup>++</sup> | b*         | b* <sup>++</sup> | b <sup>0</sup> | b <sup>0++</sup> | Seq. | y          | y <sup>++</sup> | y*         | y* <sup>++</sup> | y <sup>0</sup> | y <sup>0++</sup> | #  |
|----|------------|-----------------|------------|------------------|----------------|------------------|------|------------|-----------------|------------|------------------|----------------|------------------|----|
| 1  | 157.108387 | 79.057831       | 140.081838 | 70.544557        |                |                  | R    |            |                 |            |                  |                |                  | 11 |
| 2  | 214.129851 | 107.568564      | 197.103302 | 99.055289        |                |                  | G    | 957.511221 | 479.259249      | 940.484672 | 470.745974       | 939.500656     | 470.253966       | 10 |
| 3  | 313.198265 | 157.102770      | 296.171716 | 148.589496       |                |                  | V    | 900.489757 | 450.748517      | 883.463208 | 442.235242       | 882.479192     | 441.743234       | 9  |
| 4  | 400.230293 | 200.618785      | 383.203744 | 192.105510       | 382.219728     | 191.613502       | S    | 801.421343 | 401.214310      | 784.394794 | 392.701035       | 783.410778     | 392.209027       | 8  |
| 5  | 528.288871 | 264.648074      | 511.262322 | 256.134799       | 510.278306     | 255.642791       | Q    | 714.389315 | 357.698296      | 697.362766 | 349.185021       | 696.378750     | 348.693013       | 7  |
| 6  | 599.325985 | 300.166631      | 582.299436 | 291.653356       | 581.315420     | 291.161348       | A    | 586.330737 | 293.669007      | 569.304188 | 285.155732       | 568.320172     | 284.663724       | 6  |
| 7  | 696.378749 | 348.693013      | 679.352200 | 340.179738       | 678.368184     | 339.687730       | P    | 515.293623 | 258.150450      | 498.267074 | 249.637175       | 497.283058     | 249.145167       | 5  |
| 8  | 797.426428 | 399.216852      | 780.399879 | 390.703578       | 779.415863     | 390.211570       | T    | 418.240859 | 209.624068      | 401.214310 | 201.110793       | 400.230294     | 200.618785       | 4  |
| 9  | 868.463542 | 434.735409      | 851.436993 | 426.222135       | 850.452977     | 425.730127       | A    | 317.193180 | 159.100228      | 300.166631 | 150.586953       |                |                  | 3  |
| 10 | 939.500656 | 470.253966      | 922.474107 | 461.740692       | 921.490091     | 461.248684       | A    | 246.156066 | 123.581671      | 229.129517 | 115.068397       |                |                  | 2  |
| 11 |            |                 |            |                  |                |                  | R    | 175.118952 | 88.063114       | 158.092403 | 79.549840        |                |                  | 1  |

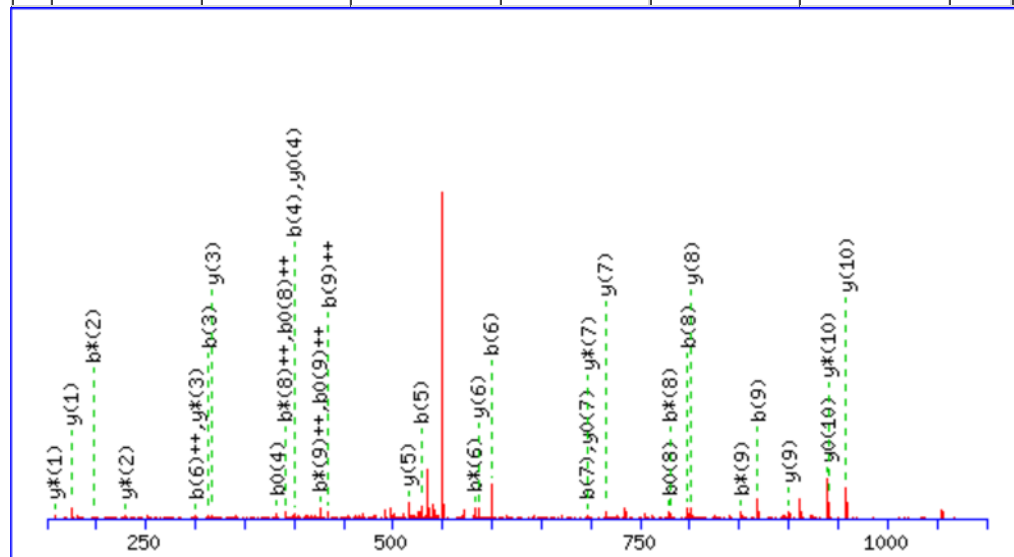



## Peptide View

MS/MS Fragmentation of **AGLIDDAFSLAR**

Found in **IPI00007798**, Tax\_Id=9606 Gene\_Symbol=TRHDE Thyrotropin-releasing hormone-degrading ectoenzyme

**Experiment:** 22 - NOPC1 **Fraction:** NOPC1

Match to Query 6051: 1247.651448 from(624.833000,2+)

Title: OECHL100310\_21.19486.19486.2.dta

Data file \\BOROMIR\Masse\Data LTQ-Orbitrap\Chrystelle Lacroix\Etude clinique sJPU\OECHL100310\_21.raw

**Monoisotopic mass of neutral peptide Mr(calc):** 1247.650986**Fixed modifications:** Carbamidomethyl (C) (apply to specified residues or termini only)**Ions Score:** 50

**Expect:** 0.00089**Matches :** 16/96 fragment ions using 33 most intense peaks ([help](#))

| #  | b                 | b <sup>++</sup> | b <sup>0</sup>    | b <sup>0++</sup> | Seq. | y                  | y <sup>++</sup>   | y*          | y <sup>*++</sup> | y <sup>0</sup> | y <sup>0++</sup> | #  |
|----|-------------------|-----------------|-------------------|------------------|------|--------------------|-------------------|-------------|------------------|----------------|------------------|----|
| 1  | 72.044390         | 36.525833       |                   |                  | A    |                    |                   |             |                  |                |                  | 12 |
| 2  | 129.065854        | 65.036565       |                   |                  | G    | 1177.621164        | 589.314220        | 1160.594615 | 580.800946       | 1159.610599    | 580.308938       | 11 |
| 3  | <b>242.149918</b> | 121.578597      |                   |                  | L    | <b>1120.599700</b> | <b>560.803488</b> | 1103.573151 | 552.290214       | 1102.589135    | 551.798205       | 10 |
| 4  | <b>355.233982</b> | 178.120629      |                   |                  | I    | <b>1007.515636</b> | <b>504.261456</b> | 990.489087  | 495.748182       | 989.505071     | 495.256174       | 9  |
| 5  | <b>470.260925</b> | 235.634101      | 452.250360        | 226.628818       | D    | <b>894.431572</b>  | <b>447.719424</b> | 877.405023  | 439.206150       | 876.421007     | 438.714142       | 8  |
| 6  | 585.287868        | 293.147572      | 567.277303        | 284.142290       | D    | <b>779.404629</b>  | 390.205953        | 762.378080  | 381.692678       | 761.394064     | 381.200670       | 7  |
| 7  | 656.324982        | 328.666129      | 638.314417        | 319.660847       | A    | 664.377686         | 332.692481        | 647.351137  | 324.179207       | 646.367121     | 323.687199       | 6  |
| 8  | <b>803.393396</b> | 402.200336      | 785.382831        | 393.195054       | F    | <b>593.340572</b>  | 297.173924        | 576.314023  | 288.660650       | 575.330007     | 288.168642       | 5  |
| 9  | 890.425424        | 445.716350      | 872.414859        | 436.711068       | S    | <b>446.272158</b>  | 223.639717        | 429.245609  | 215.126443       | 428.261593     | 214.634435       | 4  |
| 10 | 1003.509488       | 502.258382      | <b>985.498923</b> | 493.253100       | L    | <b>359.240130</b>  | 180.123703        | 342.213581  | 171.610429       |                |                  | 3  |
| 11 | 1074.546602       | 537.776939      | 1056.536037       | 528.771657       | A    | <b>246.156066</b>  | 123.581671        | 229.129517  | 115.068397       |                |                  | 2  |
| 12 |                   |                 |                   |                  | R    | 175.118952         | 88.063114         | 158.092403  | 79.549839        |                |                  | 1  |

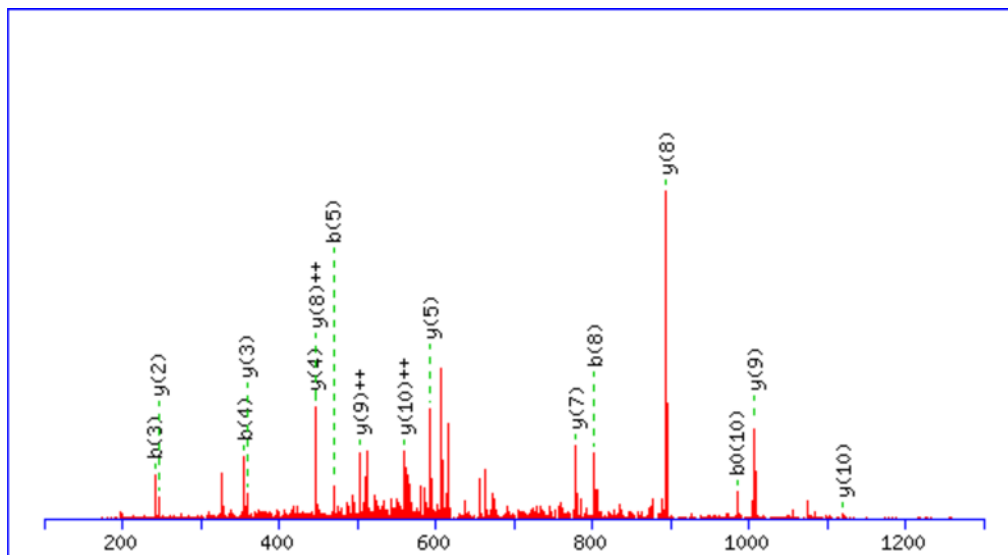

## Peptide View

MS/MS Fragmentation of **VSDATGQMNLTK**

Found in **IPI00027341**, Tax\_Id=9606 Gene\_Symbol=CAPG Macrophage-capping protein

**Experiment:** 37 - OPC-1 **Fraction:** OPC-1

Match to Query 6516: 1263.613048 from(632.813800,2+)

Title: OECHL100310\_19.7235.7235.2.dta

Data file \\BOROMIR\Masse\Data LTQ-Orbitrap\Chrystelle Lacroix\Etude clinique sJPU\OECHL100310\_19.raw

**Monoisotopic mass of neutral peptide Mr(calc):** 1263.612900 **Fixed modifications:** Carbamidomethyl (C) (apply to specified residues or termini only) **Ions Score:** 79

**Expect:** 1.5e-006 **Matches :** 31/116 fragment ions using 44 most intense peaks ([help](#))

| # | b                 | b <sup>++</sup>   | b <sup>*</sup> | b <sup>*++</sup> | b <sup>0</sup>    | b <sup>0++</sup> | Seq. | y                  | y <sup>++</sup>   | y <sup>*</sup>    | y <sup>*++</sup>  | y <sup>0</sup> | y <sup>0++</sup>  | #  |
|---|-------------------|-------------------|----------------|------------------|-------------------|------------------|------|--------------------|-------------------|-------------------|-------------------|----------------|-------------------|----|
| 1 | 100.075690        | 50.541483         |                |                  |                   |                  | V    |                    |                   |                   |                   |                |                   | 12 |
| 2 | <b>187.107718</b> | 94.057497         |                |                  | 169.097153        | 85.052214        | S    | <b>1165.551765</b> | 583.279520        | 1148.525216       | <b>574.766246</b> | 1147.541200    | <b>574.274238</b> | 11 |
| 3 | <b>302.134661</b> | 151.570968        |                |                  | <b>284.124096</b> | 142.565686       | D    | <b>1078.519737</b> | <b>539.763507</b> | 1061.493188       | <b>531.250232</b> | 1060.509172    | <b>530.758224</b> | 10 |
| 4 | <b>373.171775</b> | <b>187.089525</b> |                |                  | 355.161210        | 178.084243       | A    | <b>963.492794</b>  | 482.250035        | 946.466245        | 473.736761        | 945.482229     | 473.244753        | 9  |
| 5 | <b>474.219454</b> | 237.613365        |                |                  | <b>456.208889</b> | 228.608082       | T    | <b>892.455680</b>  | <b>446.731478</b> | 875.429131        | 438.218204        | 874.445115     | 437.726196        | 8  |
| 6 | <b>531.240918</b> | 266.124097        |                |                  | 513.230353        | 257.118815       | G    | <b>791.408001</b>  | 396.207639        | <b>774.381452</b> | 387.694364        | 773.397436     | 387.202356        | 7  |

|    |             |            |             |            |             |            |   |            |            |            |            |            |            |   |
|----|-------------|------------|-------------|------------|-------------|------------|---|------------|------------|------------|------------|------------|------------|---|
| 7  | 659.299496  | 330.153386 | 642.272947  | 321.640112 | 641.288931  | 321.148104 | Q | 734.386537 | 367.696907 | 717.359988 | 359.183632 | 716.375972 | 358.691624 | 6 |
| 8  | 790.339981  | 395.673629 | 773.313432  | 387.160354 | 772.329416  | 386.668346 | M | 606.327959 | 303.667618 | 589.301410 | 295.154343 | 588.317394 | 294.662335 | 5 |
| 9  | 904.382908  | 452.695092 | 887.356359  | 444.181818 | 886.372343  | 443.689810 | N | 475.287474 | 238.147375 | 458.260925 | 229.634100 | 457.276909 | 229.142092 | 4 |
| 10 | 1017.466972 | 509.237124 | 1000.440423 | 500.723850 | 999.456407  | 500.231842 | L | 361.244547 | 181.125911 | 344.217998 | 172.612637 | 343.233982 | 172.120629 | 3 |
| 11 | 1118.514651 | 559.760964 | 1101.488102 | 551.247689 | 1100.504086 | 550.755681 | T | 248.160483 | 124.583879 | 231.133934 | 116.070605 | 230.149918 | 115.578597 | 2 |
| 12 |             |            |             |            |             |            | K | 147.112804 | 74.060040  | 130.086255 | 65.546765  |            |            | 1 |

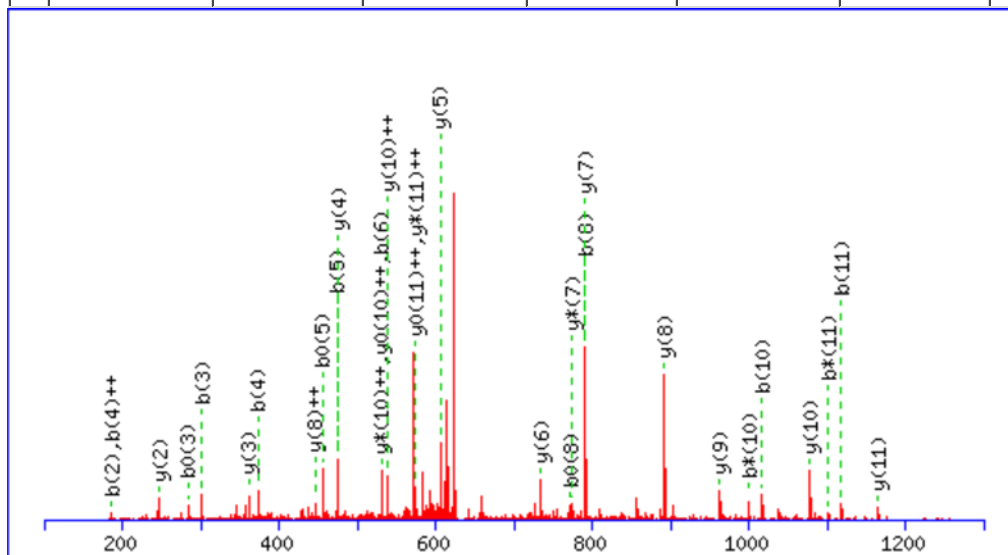

## Peptide View

MS/MS Fragmentation of **KAGPCEQAGSPCR**

Found in **IPI00028381**, Tax\_Id=9606 Gene\_Symbol=DLK2 Isoform 1 of Protein delta homolog 2

Experiment: 37 - OPC-1 Fraction: OPC-1

Match to Query 8167: 1416.625048 from(709.319800,2+)

Title: OECHL100310\_19.2085.2085.2.dta

Data file \\BOROMIR\Masse\Data LTQ-Orbitrap\Chrystelle Lacroix\Etude clinique sJPU\OECHL100310\_19.raw

**Monoisotopic mass of neutral peptide Mr(calc):** 1416.623810 **Fixed modifications:** Carbamidomethyl (C) (apply to specified residues or termini only) **Ions Score:** 76

**Expect:** 1.6e-006 **Matches :** 22/128 fragment ions using 37 most intense peaks ([help](#))

| # | b | b <sup>++</sup> | b <sup>*</sup> | b <sup>*++</sup> | b <sup>0</sup> | b <sup>0++</sup> | Seq. | y | y <sup>++</sup> | y <sup>*</sup> | y <sup>*++</sup> | y <sup>0</sup> | y <sup>0++</sup> | # |
|---|---|-----------------|----------------|------------------|----------------|------------------|------|---|-----------------|----------------|------------------|----------------|------------------|---|
|---|---|-----------------|----------------|------------------|----------------|------------------|------|---|-----------------|----------------|------------------|----------------|------------------|---|

|    |             |            |             |            |             |            |   |             |            |             |            |             |            |  |    |
|----|-------------|------------|-------------|------------|-------------|------------|---|-------------|------------|-------------|------------|-------------|------------|--|----|
| 1  | 129.102239  | 65.054757  | 112.075690  | 56.541483  |             |            | K |             |            |             |            |             |            |  | 13 |
| 2  | 200.139353  | 100.573315 | 183.112804  | 92.060040  |             |            | A | 1289.536133 | 645.271705 | 1272.509584 | 636.758430 | 1271.525568 | 636.266422 |  | 12 |
| 3  | 257.160817  | 129.084047 | 240.134268  | 120.570772 |             |            | G | 1218.499019 | 609.753148 | 1201.472470 | 601.239873 | 1200.488454 | 600.747865 |  | 11 |
| 4  | 354.213581  | 177.610429 | 337.187032  | 169.097154 |             |            | P | 1161.477555 | 581.242416 | 1144.451006 | 572.729141 | 1143.466990 | 572.237133 |  | 10 |
| 5  | 514.244230  | 257.625753 | 497.217681  | 249.112479 |             |            | C | 1064.424791 | 532.716034 | 1047.398242 | 524.202759 | 1046.414226 | 523.710751 |  | 9  |
| 6  | 643.286823  | 322.147050 | 626.260274  | 313.633775 | 625.276258  | 313.141767 | E | 904.394142  | 452.700709 | 887.367593  | 444.187434 | 886.383577  | 443.695427 |  | 8  |
| 7  | 771.345401  | 386.176339 | 754.318852  | 377.663064 | 753.334836  | 377.171056 | Q | 775.351549  | 388.179413 | 758.325000  | 379.666138 | 757.340984  | 379.174130 |  | 7  |
| 8  | 842.382515  | 421.694896 | 825.355966  | 413.181621 | 824.371950  | 412.689613 | A | 647.292971  | 324.150124 | 630.266422  | 315.636849 | 629.282406  | 315.144841 |  | 6  |
| 9  | 899.403979  | 450.205628 | 882.377430  | 441.692353 | 881.393414  | 441.200345 | G | 576.255857  | 288.631567 | 559.229308  | 280.118292 | 558.245292  | 279.626284 |  | 5  |
| 10 | 986.436007  | 493.721642 | 969.409458  | 485.208367 | 968.425442  | 484.716359 | S | 519.234393  | 260.120835 | 502.207844  | 251.607560 | 501.223828  | 251.115552 |  | 4  |
| 11 | 1083.488771 | 542.248024 | 1066.462222 | 533.734749 | 1065.478206 | 533.242741 | P | 432.202365  | 216.604820 | 415.175816  | 208.091546 |             |            |  | 3  |
| 12 | 1243.519420 | 622.263348 | 1226.492871 | 613.750074 | 1225.508855 | 613.258066 | C | 335.149601  | 168.078438 | 318.123052  | 159.565164 |             |            |  | 2  |
| 13 |             |            |             |            |             |            | R | 175.118952  | 88.063114  | 158.092403  | 79.549839  |             |            |  | 1  |

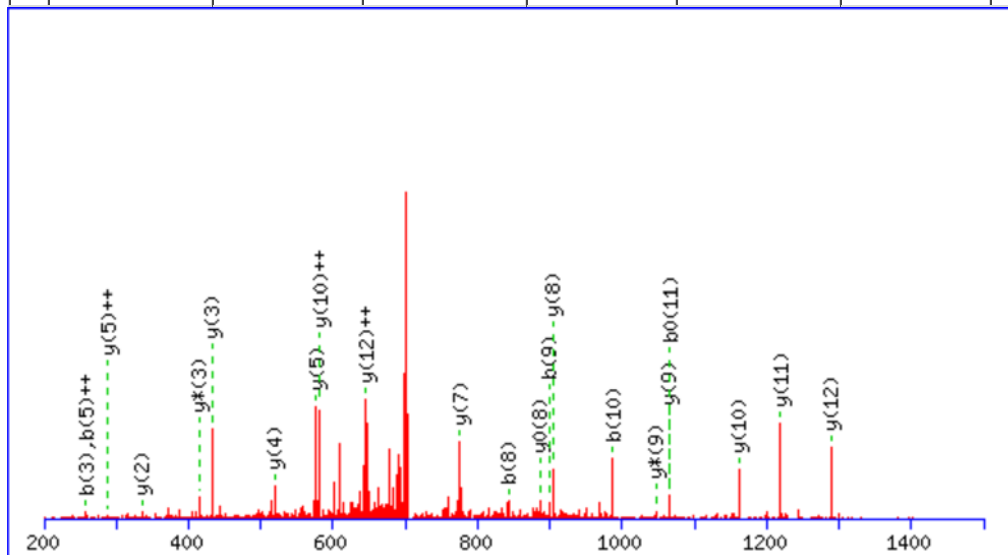

## Peptide View

MS/MS Fragmentation of **AVGLLTVISK**

Found in **IPI00013446**, Tax\_Id=9606 Gene\_Symbol=PSCA Prostate stem cell antigen

**Experiment:** 37 - OPC-1 **Fraction:** OPC-1

Match to Query 2694: 999.633448 from(500.824000,2+)

Title: OECHL100310\_19.16482.16482.2.dta

Data file \\BOROMIR\Masse\Data LTQ-Orbitrap\Chrystelle Lacroix\Etude clinique sJPU\OECHL100310\_19.raw

**Monoisotopic mass of neutral peptide Mr(calc):** 999.632828**Fixed modifications:** Carbamidomethyl (C) (apply to specified residues or termini only)**Ions Score:** 67

**Expect:** 2.3e-006**Matches :** 17/78 fragment ions using 24 most intense peaks ([help](#))

| #  | b                 | b <sup>++</sup>   | b <sup>0</sup> | b <sup>0++</sup> | Seq. | y                 | y <sup>++</sup> | y*         | y <sup>*++</sup> | y <sup>0</sup> | y <sup>0++</sup> | #  |
|----|-------------------|-------------------|----------------|------------------|------|-------------------|-----------------|------------|------------------|----------------|------------------|----|
| 1  | 72.044390         | 36.525833         |                |                  | A    |                   |                 |            |                  |                |                  | 10 |
| 2  | <b>171.112804</b> | 86.060040         |                |                  | V    | <b>929.602995</b> | 465.305136      | 912.576446 | 456.791861       | 911.592430     | 456.299853       | 9  |
| 3  | <b>228.134268</b> | 114.570772        |                |                  | G    | <b>830.534581</b> | 415.770929      | 813.508032 | 407.257654       | 812.524016     | 406.765646       | 8  |
| 4  | <b>341.218332</b> | <b>171.112804</b> |                |                  | L    | 773.513117        | 387.260197      | 756.486568 | 378.746922       | 755.502552     | 378.254914       | 7  |
| 5  | <b>454.302396</b> | <b>227.654836</b> |                |                  | L    | <b>660.429053</b> | 330.718165      | 643.402504 | 322.204890       | 642.418488     | 321.712882       | 6  |
| 6  | <b>555.350075</b> | 278.178676        | 537.339510     | 269.173393       | T    | <b>547.344989</b> | 274.176133      | 530.318440 | 265.662858       | 529.334424     | 265.170850       | 5  |
| 7  | <b>654.418489</b> | 327.712883        | 636.407924     | 318.707600       | V    | <b>446.297310</b> | 223.652293      | 429.270761 | 215.139018       | 428.286745     | 214.647010       | 4  |
| 8  | <b>767.502553</b> | 384.254915        | 749.491988     | 375.249632       | I    | <b>347.228896</b> | 174.118086      | 330.202347 | 165.604811       | 329.218331     | 165.112803       | 3  |
| 9  | <b>854.534581</b> | 427.770929        | 836.524016     | 418.765646       | S    | <b>234.144832</b> | 117.576054      | 217.118283 | 109.062779       | 216.134267     | 108.570771       | 2  |
| 10 |                   |                   |                |                  | K    | 147.112804        | 74.060040       | 130.086255 | 65.546765        |                |                  | 1  |

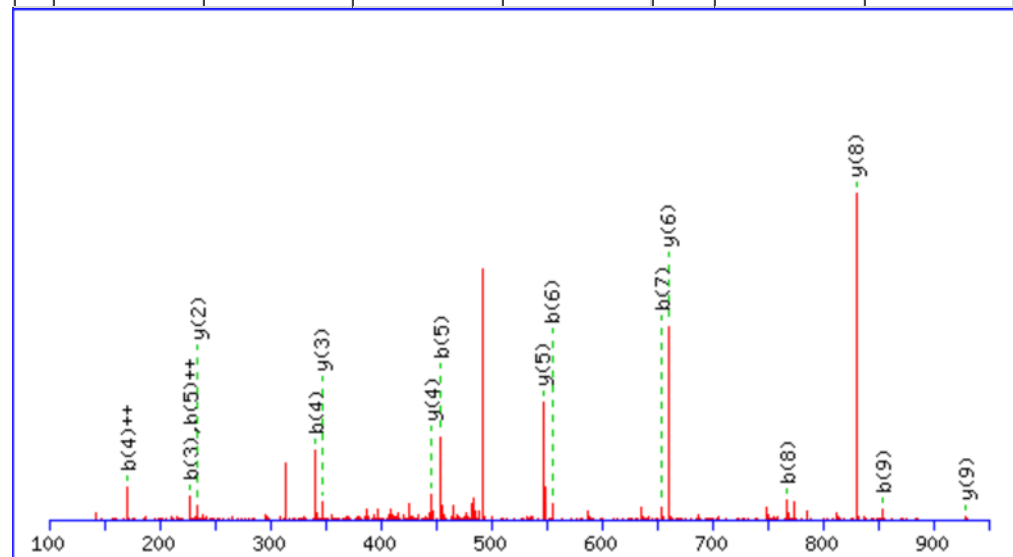

## Peptide View

MS/MS Fragmentation of **ASLQHGQAAEKGP~~HR~~**

Found in **IPI00165044**, Tax\_Id=9606 Gene\_Symbol=FAM198B Isoform 2 of Protein ENED

**Experiment:** 37 - OPC-1 **Fraction:** OPC-1

Match to Query 10073: 1585.807848 from(793.911200,2+)

Title: OECHL100310\_19.1907.1907.2.dta

Data file \\BOROMIR\Masse\Data LTQ-Orbitrap\Chrystelle Lacroix\Etude clinique sJPU\OECHL100310\_19.raw

**Monoisotopic mass of neutral peptide Mr(calc):** 1585.807312 **Fixed modifications:** Carbamidomethyl (C) (apply to specified residues or termini only) **Ions Score:** 51

**Expect:** 0.0011 **Matches :** 11/150 fragment ions using 13 most intense peaks ([help](#))

| #  | b                  | b <sup>++</sup> | b*          | b <sup>*++</sup> | b <sup>0</sup> | b <sup>0++</sup> | Seq. | y                  | y <sup>++</sup>   | y*          | y <sup>*++</sup> | y <sup>0</sup> | y <sup>0++</sup> | #  |
|----|--------------------|-----------------|-------------|------------------|----------------|------------------|------|--------------------|-------------------|-------------|------------------|----------------|------------------|----|
| 1  | 72.044390          | 36.525833       |             |                  |                |                  | A    |                    |                   |             |                  |                |                  | 15 |
| 2  | 159.076418         | 80.041847       |             |                  | 141.065853     | 71.036564        | S    | 1515.777500        | 758.392388        | 1498.750951 | 749.879114       | 1497.766935    | 749.387106       | 14 |
| 3  | 272.160482         | 136.583879      |             |                  | 254.149917     | 127.578597       | L    | 1428.745472        | 714.876374        | 1411.718923 | 706.363100       | 1410.734907    | 705.871092       | 13 |
| 4  | 400.219060         | 200.613168      | 383.192511  | 192.099894       | 382.208495     | 191.607886       | Q    | 1315.661408        | 658.334342        | 1298.634859 | 649.821068       | 1297.650843    | 649.329060       | 12 |
| 5  | 537.277972         | 269.142624      | 520.251423  | 260.629350       | 519.267407     | 260.137342       | H    | <b>1187.602830</b> | <b>594.305053</b> | 1170.576281 | 585.791779       | 1169.592265    | 585.299771       | 11 |
| 6  | <b>594.299436</b>  | 297.653356      | 577.272887  | 289.140082       | 576.288871     | 288.648074       | G    | <b>1050.543918</b> | 525.775597        | 1033.517369 | 517.262323       | 1032.533353    | 516.770315       | 10 |
| 7  | 722.358014         | 361.682645      | 705.331465  | 353.169371       | 704.347449     | 352.677363       | Q    | <b>993.522454</b>  | 497.264865        | 976.495905  | 488.751591       | 975.511889     | 488.259583       | 9  |
| 8  | 793.395128         | 397.201202      | 776.368579  | 388.687928       | 775.384563     | 388.195920       | A    | <b>865.463876</b>  | 433.235576        | 848.437327  | 424.722302       | 847.453311     | 424.230294       | 8  |
| 9  | 864.432242         | 432.719759      | 847.405693  | 424.206485       | 846.421677     | 423.714477       | A    | 794.426762         | 397.717019        | 777.400213  | 389.203745       | 776.416197     | 388.711737       | 7  |
| 10 | <b>993.474835</b>  | 497.241056      | 976.448286  | 488.727781       | 975.464270     | 488.235773       | E    | 723.389648         | 362.198462        | 706.363099  | 353.685188       | 705.379083     | 353.193180       | 6  |
| 11 | 1121.569798        | 561.288537      | 1104.543249 | 552.775263       | 1103.559233    | 552.283255       | K    | <b>594.347055</b>  | 297.677166        | 577.320506  | 289.163891       |                |                  | 5  |
| 12 | 1178.591262        | 589.799269      | 1161.564713 | 581.285995       | 1160.580697    | 580.793987       | G    | <b>466.252092</b>  | 233.629684        | 449.225543  | 225.116409       |                |                  | 4  |
| 13 | 1275.644026        | 638.325651      | 1258.617477 | 629.812377       | 1257.633461    | 629.320369       | P    | <b>409.230628</b>  | 205.118952        | 392.204079  | 196.605677       |                |                  | 3  |
| 14 | <b>1412.702938</b> | 706.855107      | 1395.676389 | 698.341833       | 1394.692373    | 697.849825       | H    | 312.177864         | 156.592570        | 295.151315  | 148.079295       |                |                  | 2  |
| 15 |                    |                 |             |                  |                |                  | R    | 175.118952         | 88.063114         | 158.092403  | 79.549839        |                |                  | 1  |

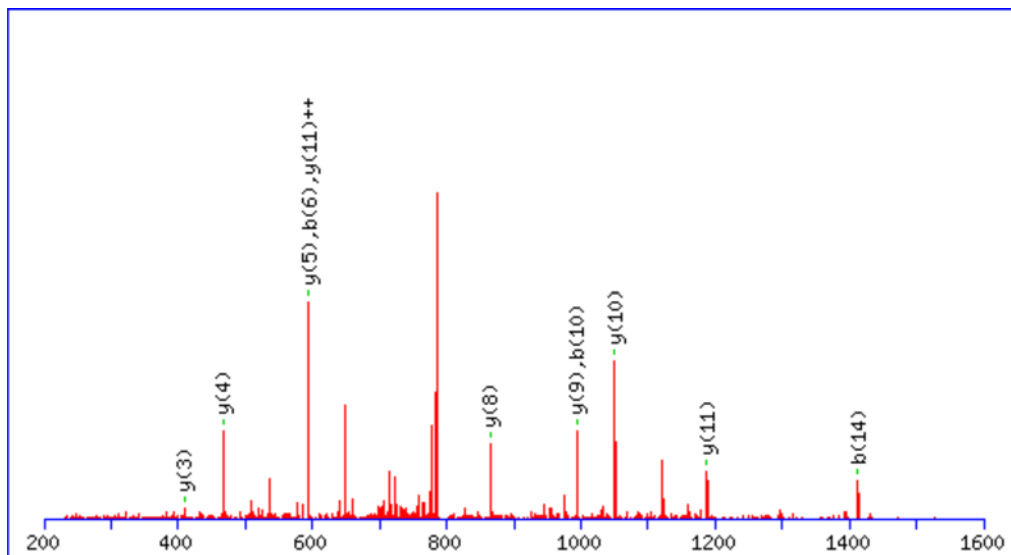

## Peptide View

MS/MS Fragmentation of **AFPALTSLDLSDNPGLGER**

Found in **IPI00029260**, Tax\_Id=9606 Gene\_Symbol=CD14 Monocyte differentiation antigen CD14

**Experiment:** 37 - OPC-1 **Fraction:** OPC-1

Match to Query 13759: 1971.990848 from(987.002700,2+)

Title: OECHL100310\_19.18714.18714.2.dta

Data file \\BOROMIR\Masse\Data LTQ-Orbitrap\Chrystelle Lacroix\Etude clinique sJPU\OECHL100310\_19.raw

**Monoisotopic mass of neutral peptide Mr(calc):** 1971.990158 **Fixed modifications:** Carbamidomethyl (C) (apply to specified residues or termini only) **Ions Score:** 77

**Expect:** 2.8e-006 **Matches :** 40/180 fragment ions using 95 most intense peaks ([help](#))

| # | b                 | b <sup>++</sup> | b* | b* <sup>++</sup> | b <sup>0</sup> | b <sup>0++</sup> | Seq. | y                  | y <sup>++</sup>   | y*          | y* <sup>++</sup>  | y <sup>0</sup>     | y <sup>0++</sup>  | #  |
|---|-------------------|-----------------|----|------------------|----------------|------------------|------|--------------------|-------------------|-------------|-------------------|--------------------|-------------------|----|
| 1 | 72.044390         | 36.525833       |    |                  |                |                  | A    |                    |                   |             |                   |                    |                   | 19 |
| 2 | 219.112804        | 110.060040      |    |                  |                |                  | F    | 1901.960333        | 951.483805        | 1884.933784 | 942.970530        | 1883.949768        | 942.478522        | 18 |
| 3 | 316.165568        | 158.586422      |    |                  |                |                  | P    | <b>1754.891919</b> | <b>877.949597</b> | 1737.865370 | <b>869.436323</b> | 1736.881354        | <b>868.944315</b> | 17 |
| 4 | <b>387.202682</b> | 194.104979      |    |                  |                |                  | A    | 1657.839155        | 829.423215        | 1640.812606 | 820.909941        | 1639.828590        | 820.417933        | 16 |
| 5 | <b>500.286746</b> | 250.647011      |    |                  |                |                  | L    | <b>1586.802041</b> | 793.904659        | 1569.775492 | 785.391384        | 1568.791476        | 784.899376        | 15 |
| 6 | <b>601.334425</b> | 301.170851      |    |                  | 583.323860     | 292.165568       | T    | <b>1473.717977</b> | 737.362627        | 1456.691428 | 728.849352        | <b>1455.707412</b> | 728.357344        | 14 |

|    |                    |            |                    |            |                    |            |          |                    |                   |             |            |                    |                   |           |
|----|--------------------|------------|--------------------|------------|--------------------|------------|----------|--------------------|-------------------|-------------|------------|--------------------|-------------------|-----------|
| 7  | 688.366453         | 344.686865 |                    |            | <b>670.355888</b>  | 335.681582 | <b>S</b> | <b>1372.670298</b> | 686.838787        | 1355.643749 | 678.325513 | 1354.659733        | 677.833505        | <b>13</b> |
| 8  | 801.450517         | 401.228897 |                    |            | 783.439952         | 392.223614 | <b>L</b> | <b>1285.638270</b> | 643.322773        | 1268.611721 | 634.809499 | <b>1267.627705</b> | 634.317491        | <b>12</b> |
| 9  | <b>916.477460</b>  | 458.742368 |                    |            | 898.466895         | 449.737085 | <b>D</b> | <b>1172.554206</b> | 586.780741        | 1155.527657 | 578.267467 | 1154.543641        | 577.775459        | <b>11</b> |
| 10 | <b>1029.561524</b> | 515.284400 |                    |            | <b>1011.550959</b> | 506.279117 | <b>L</b> | <b>1057.527263</b> | 529.267270        | 1040.500714 | 520.753995 | 1039.516698        | 520.261987        | <b>10</b> |
| 11 | <b>1116.593552</b> | 558.800414 |                    |            | <b>1098.582987</b> | 549.795132 | <b>S</b> | <b>944.443199</b>  | <b>472.725238</b> | 927.416650  | 464.211963 | 926.432634         | 463.719955        | <b>9</b>  |
| 12 | <b>1231.620495</b> | 616.313886 |                    |            | <b>1213.609930</b> | 607.308603 | <b>D</b> | <b>857.411171</b>  | 429.209224        | 840.384622  | 420.695949 | 839.400606         | 420.203941        | <b>8</b>  |
| 13 | <b>1345.663422</b> | 673.335349 | 1328.636873        | 664.822075 | 1327.652857        | 664.330067 | <b>N</b> | <b>742.384228</b>  | 371.695752        | 725.357679  | 363.182477 | 724.373663         | <b>362.690469</b> | <b>7</b>  |
| 14 | <b>1442.716186</b> | 721.861731 | 1425.689637        | 713.348457 | 1424.705621        | 712.856449 | <b>P</b> | <b>628.341301</b>  | 314.674288        | 611.314752  | 306.161014 | 610.330736         | 305.669006        | <b>6</b>  |
| 15 | <b>1499.737650</b> | 750.372463 | 1482.711101        | 741.859189 | 1481.727085        | 741.367181 | <b>G</b> | <b>531.288537</b>  | 266.147906        | 514.261988  | 257.634632 | 513.277972         | 257.142624        | <b>5</b>  |
| 16 | <b>1612.821714</b> | 806.914495 | <b>1595.795165</b> | 798.401221 | 1594.811149        | 797.909212 | <b>L</b> | <b>474.267073</b>  | 237.637174        | 457.240524  | 229.123900 | 456.256508         | 228.631892        | <b>4</b>  |
| 17 | 1669.843178        | 835.425227 | 1652.816629        | 826.911952 | 1651.832613        | 826.419944 | <b>G</b> | <b>361.183009</b>  | 181.095142        | 344.156460  | 172.581868 | 343.172444         | 172.089860        | <b>3</b>  |
| 18 | <b>1798.885771</b> | 899.946524 | <b>1781.859222</b> | 891.433249 | 1780.875206        | 890.941241 | <b>E</b> | <b>304.161545</b>  | 152.584411        | 287.134996  | 144.071136 | 286.150980         | 143.579128        | <b>2</b>  |
| 19 |                    |            |                    |            |                    |            | <b>R</b> | 175.118952         | 88.063114         | 158.092403  | 79.549839  |                    |                   | <b>1</b>  |

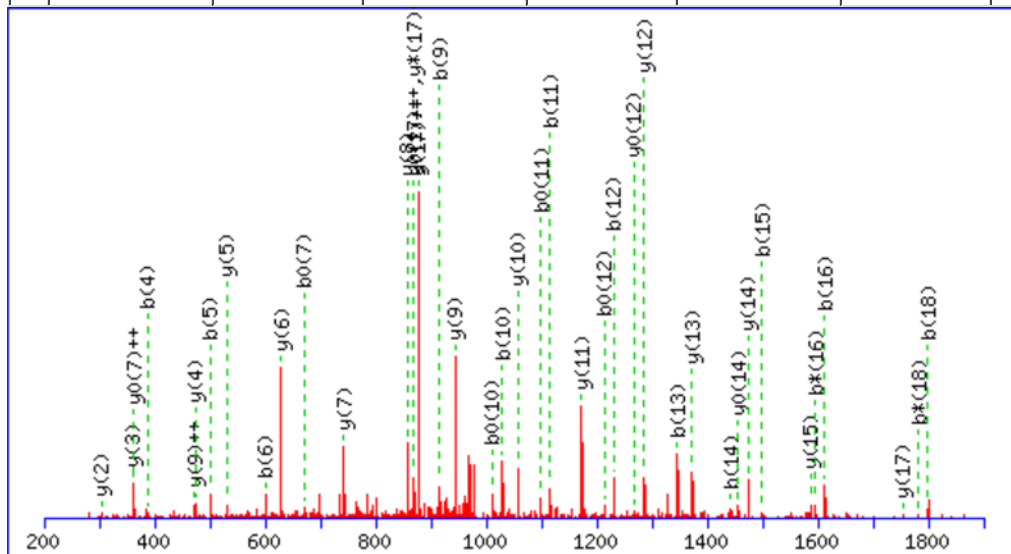

## Peptide View

MS/MS Fragmentation of **QLGPQPQDIYYEDGVVPTDRR**



Found in **IPI00015199**, Tax\_Id=9606 Gene\_Symbol=CD7 T-cell antigen CD7

**Experiment:** 37 - OPC-1 **Fraction:** OPC-1

Match to Query 16688: 2659.329372 from(887.450400,3+)

Title: OECHL100310\_19.16683.16683.3.dta

Data file \\BOROMIR\Masse\Data LTQ-Orbitrap\Chrystelle Lacroix\Etude clinique sJPU\OECHL100310\_19.raw

**Monoisotopic mass of neutral peptide Mr(calc):** 2659.324203**Fixed modifications:** Carbamidomethyl (C) (apply to specified residues or termini only)**Ions Score:** 71

**Expect:** 1.7e-005**Matches :** 58/246 fragment ions using 145 most intense peaks ([help](#))

| #  | b                  | b <sup>++</sup>   | b*                 | b <sup>*++</sup>   | b <sup>0</sup>     | b <sup>0++</sup>   | Seq. | y                  | y <sup>++</sup>    | y*                | y <sup>*++</sup>   | y <sup>0</sup>     | y <sup>0++</sup> |
|----|--------------------|-------------------|--------------------|--------------------|--------------------|--------------------|------|--------------------|--------------------|-------------------|--------------------|--------------------|------------------|
| 1  | 129.065854         | 65.036565         | 112.039305         | 56.523291          |                    |                    | Q    |                    |                    |                   |                    |                    |                  |
| 2  | 242.149918         | 121.578597        | 225.123369         | 113.065323         |                    |                    | L    | 2532.272897        | 1266.640086        | 2515.246348       | 1258.126812        | 2514.262332        | 1257.6348        |
| 3  | <b>299.171382</b>  | 150.089329        | <b>282.144833</b>  | 141.576055         |                    |                    | G    | 2419.188833        | <b>1210.098054</b> | 2402.162284       | <b>1201.584780</b> | 2401.178268        | 1201.0927        |
| 4  | <b>396.224146</b>  | 198.615711        | <b>379.197597</b>  | 190.102436         |                    |                    | P    | 2362.167369        | <b>1181.587322</b> | 2345.140820       | 1173.074048        | 2344.156804        | 1172.5820        |
| 5  | 524.282724         | 262.645000        | <b>507.256175</b>  | 254.131726         |                    |                    | Q    | 2265.114605        | <b>1133.060940</b> | 2248.088056       | <b>1124.547666</b> | 2247.104040        | 1124.0556        |
| 6  | 621.335488         | 311.171382        | 604.308939         | 302.658108         |                    |                    | P    | 2137.056027        | <b>1069.031651</b> | 2120.029478       | <b>1060.518377</b> | 2119.045462        | <b>1060.0263</b> |
| 7  | 749.394066         | 375.200671        | 732.367517         | 366.687397         |                    |                    | Q    | 2040.003263        | <b>1020.505269</b> | 2022.976714       | 1011.991995        | 2021.992698        | 1011.4999        |
| 8  | 864.421009         | 432.714143        | 847.394460         | 424.200868         | <b>846.410444</b>  | 423.708860         | D    | 1911.944685        | <b>956.475980</b>  | 1894.918136       | 947.962706         | 1893.934120        | 947.4706         |
| 9  | 977.505073         | <b>489.256175</b> | 960.478524         | 480.742900         | 959.494508         | 480.250892         | I    | 1796.917742        | <b>898.962509</b>  | 1779.891193       | 890.449234         | 1778.907177        | 889.9572         |
| 10 | 1090.589137        | 545.798206        | <b>1073.562588</b> | 537.284932         | <b>1072.578572</b> | 536.792924         | I    | 1683.833678        | <b>842.420477</b>  | 1666.807129       | 833.907202         | 1665.823113        | 833.4151         |
| 11 | 1253.652466        | 627.329871        | 1236.625917        | 618.816597         | 1235.641901        | 618.324589         | Y    | 1570.749614        | <b>785.878445</b>  | 1553.723065       | 777.365170         | 1552.739049        | 776.8731         |
| 12 | <b>1416.715795</b> | 708.861536        | <b>1399.689246</b> | 700.348261         | <b>1398.705230</b> | 699.856253         | Y    | 1407.686285        | <b>704.346780</b>  | 1390.659736       | 695.833506         | <b>1389.675720</b> | 695.3414         |
| 13 | <b>1545.758388</b> | 773.382832        | <b>1528.731839</b> | 764.869558         | <b>1527.747823</b> | 764.377549         | E    | <b>1244.622956</b> | <b>622.815116</b>  | 1227.596407       | 614.301841         | 1226.612391        | <b>613.8098</b>  |
| 14 | <b>1660.785331</b> | 830.896304        | <b>1643.758782</b> | 822.383029         | <b>1642.774766</b> | 821.891021         | D    | 1115.580363        | <b>558.293819</b>  | 1098.553814       | 549.780545         | 1097.569798        | 549.2885         |
| 15 | 1717.806795        | 859.407036        | 1700.780246        | 850.893761         | <b>1699.796230</b> | 850.401753         | G    | <b>1000.553420</b> | <b>500.780348</b>  | <b>983.526871</b> | 492.267073         | 982.542855         | 491.7750         |
| 16 | 1816.875209        | 908.941243        | <b>1799.848660</b> | <b>900.427968</b>  | <b>1798.864644</b> | <b>899.935960</b>  | V    | 943.531956         | 472.269616         | 926.505407        | 463.756341         | 925.521391         | 463.2643         |
| 17 | 1915.943623        | 958.475450        | <b>1898.917074</b> | 949.962175         | <b>1897.933058</b> | 949.470167         | V    | 844.463542         | <b>422.735409</b>  | 827.436993        | 414.222134         | 826.452977         | 413.7301         |
| 18 | 2012.996387        | 1007.001832       | 1995.969838        | 998.488557         | 1994.985822        | 997.996549         | P    | <b>745.395128</b>  | <b>373.201202</b>  | <b>728.368579</b> | 364.687927         | <b>727.384563</b>  | 364.1959         |
| 19 | 2114.044066        | 1057.525671       | 2097.017517        | 1049.012396        | 2096.033501        | 1048.520388        | T    | 648.342364         | 324.674820         | 631.315815        | 316.161545         | 630.331799         | 315.6695         |
| 20 | 2215.091745        | 1108.049510       | 2198.065196        | 1099.536236        | 2197.081180        | 1099.044228        | T    | 547.294685         | <b>274.150980</b>  | 530.268136        | 265.637706         | 529.284120         | 265.1456         |
| 21 | 2330.118688        | 1165.562982       | 2313.092139        | 1157.049707        | 2312.108123        | 1156.557699        | D    | 446.247006         | 223.627141         | 429.220457        | 215.113866         | 428.236441         | 214.6218         |
| 22 | 2486.219799        | 1243.613537       | 2469.193250        | <b>1235.100263</b> | 2468.209234        | <b>1234.608255</b> | R    | <b>331.220063</b>  | 166.113669         | <b>314.193514</b> | 157.600395         |                    |                  |
| 23 |                    |                   |                    |                    |                    |                    | R    | 175.118952         | 88.063114          | 158.092403        | 79.549839          |                    |                  |

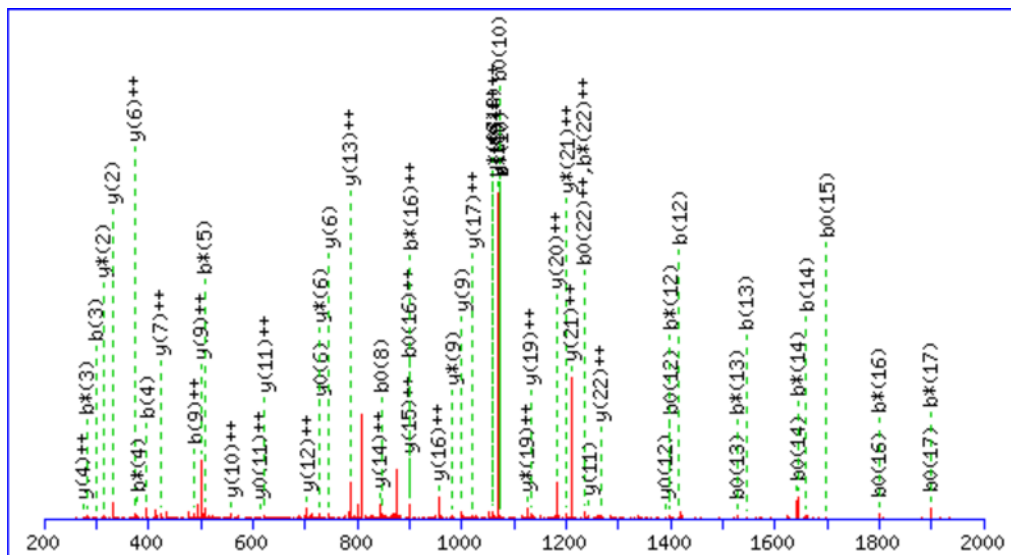

## Peptide View

MS/MS Fragmentation of **DFSLTSSSQTPGATK**

Found in **IPI00291300**, Tax\_Id=9606 Gene\_Symbol=PODXL2 Putative uncharacterized protein PODXL2

**Experiment:** 37 - OPC-1 **Fraction:** OPC-1

Match to Query 9434: 1525.727048 from(763.870800,2+)

Title: OECHL100310\_19.10377.10377.2.dta

Data file \\BOROMIR\Masse\Data LTQ-Orbitrap\Chrystelle Lacroix\Etude clinique sJPU\OECHL100310\_19.raw

**Monoisotopic mass of neutral peptide Mr(calc):** 1525.726028 **Fixed modifications:** Carbamidomethyl (C) (apply to specified residues or termini only) **Ions Score:** 70

**Expect:** 1.2e-005 **Matches :** 19/150 fragment ions using 26 most intense peaks ([help](#))

| # | b                 | b <sup>++</sup> | b <sup>*</sup> | b <sup>*++</sup> | b <sup>0</sup>    | b <sup>0++</sup> | Seq.     | y                  | y <sup>++</sup> | y <sup>*</sup> | y <sup>*++</sup>  | y <sup>0</sup> | y <sup>0++</sup>  | #         |
|---|-------------------|-----------------|----------------|------------------|-------------------|------------------|----------|--------------------|-----------------|----------------|-------------------|----------------|-------------------|-----------|
| 1 | 116.034219        | 58.520748       |                |                  | 98.023654         | 49.515465        | <b>D</b> |                    |                 |                |                   |                |                   | <b>15</b> |
| 2 | 263.102633        | 132.054954      |                |                  | 245.092068        | 123.049672       | <b>F</b> | 1411.706351        | 706.356813      | 1394.679802    | 697.843539        | 1393.695786    | 697.351531        | <b>14</b> |
| 3 | 350.134661        | 175.570968      |                |                  | <b>332.124096</b> | 166.565686       | <b>S</b> | 1264.637937        | 632.822607      | 1247.611388    | 624.309332        | 1246.627372    | 623.817324        | <b>13</b> |
| 4 | 463.218725        | 232.113001      |                |                  | <b>445.208160</b> | 223.107718       | <b>L</b> | <b>1177.605909</b> | 589.306592      | 1160.579360    | 580.793318        | 1159.595344    | 580.301310        | <b>12</b> |
| 5 | <b>564.266404</b> | 282.636840      |                |                  | 546.255839        | 273.631558       | <b>T</b> | <b>1064.521845</b> | 532.764561      | 1047.495296    | 524.251286        | 1046.511280    | 523.759278        | <b>11</b> |
| 6 | 651.298432        | 326.152854      |                |                  | 633.287867        | 317.147572       | <b>S</b> | <b>963.474166</b>  | 482.240721      | 946.447617     | <b>473.727446</b> | 945.463601     | <b>473.235438</b> | <b>10</b> |

|    |             |            |             |            |             |            |   |            |            |            |            |            |            |   |
|----|-------------|------------|-------------|------------|-------------|------------|---|------------|------------|------------|------------|------------|------------|---|
| 7  | 738.330460  | 369.668868 |             |            | 720.319895  | 360.663586 | S | 876.442138 | 438.724707 | 859.415589 | 430.211432 | 858.431573 | 429.719424 | 9 |
| 8  | 825.362488  | 413.184882 |             |            | 807.351923  | 404.179599 | S | 789.410110 | 395.208693 | 772.383561 | 386.695418 | 771.399545 | 386.203410 | 8 |
| 9  | 953.421066  | 477.214171 | 936.394517  | 468.700897 | 935.410501  | 468.208889 | Q | 702.378082 | 351.692679 | 685.351533 | 343.179404 | 684.367517 | 342.687396 | 7 |
| 10 | 1054.468745 | 527.738010 | 1037.442196 | 519.224736 | 1036.458180 | 518.732728 | T | 574.319504 | 287.663390 | 557.292955 | 279.150115 | 556.308939 | 278.658107 | 6 |
| 11 | 1151.521509 | 576.264392 | 1134.494960 | 567.751118 | 1133.510944 | 567.259110 | P | 473.271825 | 237.139550 | 456.245276 | 228.626276 | 455.261260 | 228.134268 | 5 |
| 12 | 1208.542973 | 604.775124 | 1191.516424 | 596.261850 | 1190.532408 | 595.769842 | G | 376.219061 | 188.613168 | 359.192512 | 180.099894 | 358.208496 | 179.607886 | 4 |
| 13 | 1279.580087 | 640.293681 | 1262.553538 | 631.780407 | 1261.569522 | 631.288399 | A | 319.197597 | 160.102436 | 302.171048 | 151.589162 | 301.187032 | 151.097154 | 3 |
| 14 | 1380.627766 | 690.817521 | 1363.601217 | 682.304246 | 1362.617201 | 681.812238 | T | 248.160483 | 124.583879 | 231.133934 | 116.070605 | 230.149918 | 115.578597 | 2 |
| 15 |             |            |             |            |             |            | K | 147.112804 | 74.060040  | 130.086255 | 65.546765  |            |            | 1 |

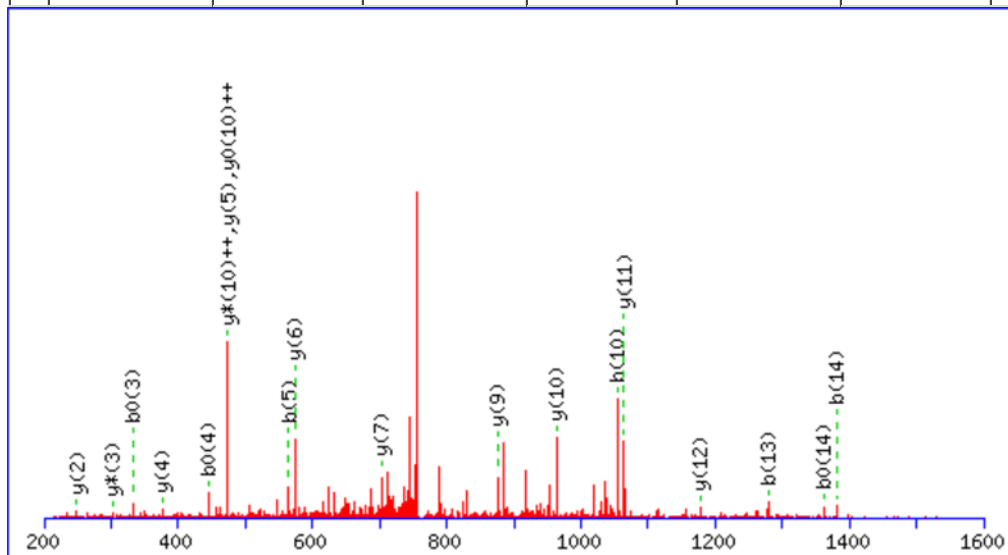

## Peptide View

MS/MS Fragmentation of **HSFKGEECPAGSHR**

Found in **IP100021970**, Tax\_Id=9606 Gene\_Symbol=MGC31957;TNFRSF10C TNFRSF10C protein

**Experiment:** 37 - OPC-1 **Fraction:** OPC-1

Match to Query 10164: 1597.706448 from(799.860500,2+)

Title: OECHL100310\_19.2243.2243.2.dta

Data file \\BOROMIR\Masse\Data LTQ-Orbitrap\Chrystelle Lacroix\Etude clinique sJPU\OECHL100310\_19.raw

**Monoisotopic mass of neutral peptide Mr(calc):** 1597.705566**Fixed modifications:** Carbamidomethyl (C) (apply to specified residues or termini only)**Ions Score:** 58  
**Expect:** 8.6e-005**Matches :** 40/144 fragment ions using 83 most intense peaks ([help](#))

| #  | b                  | b <sup>++</sup> | b*                 | b <sup>*++</sup>  | b <sup>0</sup>     | b <sup>0++</sup>  | Seq. | y                  | y <sup>++</sup>   | y*          | y <sup>*++</sup> | y <sup>0</sup>     | y <sup>0++</sup> | #  |
|----|--------------------|-----------------|--------------------|-------------------|--------------------|-------------------|------|--------------------|-------------------|-------------|------------------|--------------------|------------------|----|
| 1  | 138.066188         | 69.536732       |                    |                   |                    |                   | H    |                    |                   |             |                  |                    |                  | 14 |
| 2  | <b>225.098216</b>  | 113.052746      |                    |                   | 207.087651         | 104.047463        | S    | <b>1461.653938</b> | <b>731.330607</b> | 1444.627389 | 722.817333       | <b>1443.643373</b> | 722.325325       | 13 |
| 3  | <b>372.166630</b>  | 186.586953      |                    |                   | <b>354.156065</b>  | 177.581671        | F    | <b>1374.621910</b> | <b>687.814593</b> | 1357.595361 | 679.301319       | 1356.611345        | 678.809311       | 12 |
| 4  | <b>500.261593</b>  | 250.634435      | <b>483.235044</b>  | 242.121160        | <b>482.251028</b>  | 241.629152        | K    | <b>1227.553496</b> | <b>614.280386</b> | 1210.526947 | 605.767112       | 1209.542931        | 605.275104       | 11 |
| 5  | 557.283057         | 279.145167      | <b>540.256508</b>  | 270.631892        | <b>539.272492</b>  | 270.139884        | G    | <b>1099.458533</b> | 550.232905        | 1082.431984 | 541.719630       | 1081.447968        | 541.227622       | 10 |
| 6  | <b>686.325650</b>  | 343.666463      | 669.299101         | 335.153189        | 668.315085         | 334.661181        | E    | <b>1042.437069</b> | 521.722173        | 1025.410520 | 513.208898       | <b>1024.426504</b> | 512.716890       | 9  |
| 7  | 815.368243         | 408.187760      | 798.341694         | <b>399.674485</b> | 797.357678         | <b>399.182477</b> | E    | <b>913.394476</b>  | <b>457.200876</b> | 896.367927  | 448.687602       | <b>895.383911</b>  | 448.195594       | 8  |
| 8  | <b>975.398892</b>  | 488.203084      | 958.372343         | 479.689810        | <b>957.388327</b>  | 479.197802        | C    | <b>784.351883</b>  | 392.679580        | 767.325334  | 384.166305       | 766.341318         | 383.674297       | 7  |
| 9  | 1072.451656        | 536.729466      | 1055.425107        | 528.216192        | 1054.441091        | 527.724184        | P    | <b>624.321234</b>  | <b>312.664255</b> | 607.294685  | 304.150981       | 606.310669         | 303.658973       | 6  |
| 10 | <b>1143.488770</b> | 572.248023      | 1126.462221        | 563.734749        | <b>1125.478205</b> | 563.242741        | A    | 527.268470         | 264.137873        | 510.241921  | 255.624598       | 509.257905         | 255.132590       | 5  |
| 11 | <b>1200.510234</b> | 600.758755      | 1183.483685        | 592.245481        | <b>1182.499669</b> | 591.753473        | G    | <b>456.231356</b>  | 228.619316        | 439.204807  | 220.106041       | 438.220791         | 219.614033       | 4  |
| 12 | <b>1287.542262</b> | 644.274769      | 1270.515713        | 635.761495        | 1269.531697        | 635.269487        | S    | <b>399.209892</b>  | 200.108584        | 382.183343  | 191.595309       | 381.199327         | 191.103301       | 3  |
| 13 | <b>1424.601174</b> | 712.804225      | <b>1407.574625</b> | 704.290951        | <b>1406.590609</b> | 703.798943        | H    | <b>312.177864</b>  | 156.592570        | 295.151315  | 148.079295       |                    |                  | 2  |
| 14 |                    |                 |                    |                   |                    |                   | R    | 175.118952         | 88.063114         | 158.092403  | 79.549839        |                    |                  | 1  |

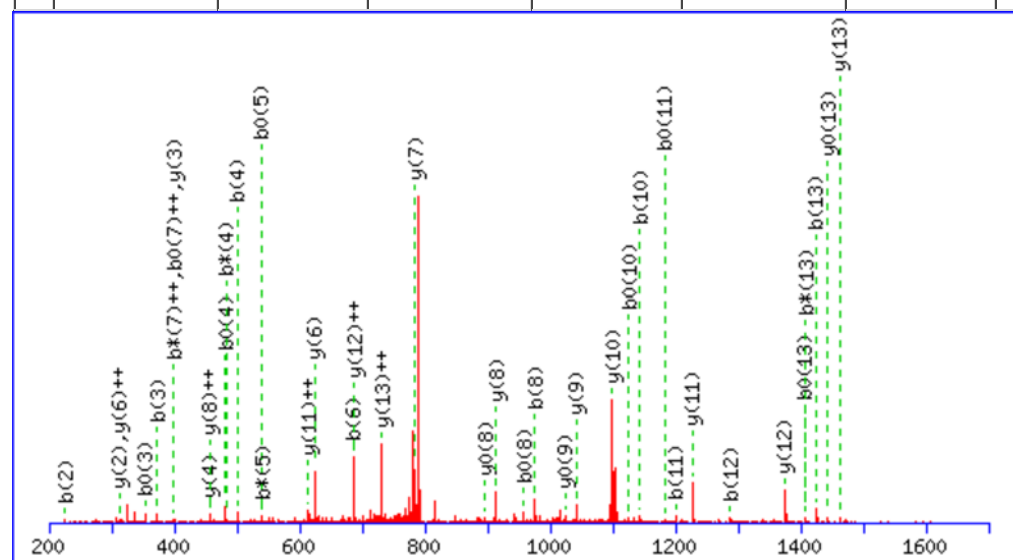

## Peptide View

MS/MS Fragmentation of **LLIYDASNLETGVPSR**

Found in **IPI00003111**, Tax\_Id=9606 Gene\_Symbol=LOC652694 Ig kappa chain V-I region AU

**Experiment:** 37 - OPC-1 **Fraction:** OPC-1

Match to Query 11997: 1746.917048 from(874.465800,2+)

Title: OECHL100310\_19.16230.16230.2.dta

Data file \\BOROMIR\Masse\Data LTQ-Orbitrap\Chrystelle Lacroix\Etude clinique sJPU\OECHL100310\_19.raw

**Monoisotopic mass of neutral peptide Mr(calc):** 1746.915192 **Fixed modifications:** Carbamidomethyl (C) (apply to specified residues or termini only) **Ions Score:** 85

**Expect:** 3.2e-007 **Matches :** 21/156 fragment ions using 28 most intense peaks ([help](#))

| #  | b                  | b <sup>++</sup> | b*                | b <sup>*++</sup> | b <sup>0</sup>    | b <sup>0++</sup> | Seq. | y                  | y <sup>++</sup> | y*          | y <sup>*++</sup> | y <sup>0</sup>     | y <sup>0++</sup> | #  |
|----|--------------------|-----------------|-------------------|------------------|-------------------|------------------|------|--------------------|-----------------|-------------|------------------|--------------------|------------------|----|
| 1  | 114.091340         | 57.549308       |                   |                  |                   |                  | L    |                    |                 |             |                  |                    |                  | 16 |
| 2  | 227.175404         | 114.091340      |                   |                  |                   |                  | L    | 1634.838427        | 817.922852      | 1617.811878 | 809.409577       | 1616.827862        | 808.917569       | 15 |
| 3  | 340.259468         | 170.633372      |                   |                  |                   |                  | I    | <b>1521.754363</b> | 761.380820      | 1504.727814 | 752.867545       | 1503.743798        | 752.375537       | 14 |
| 4  | 503.322797         | 252.165036      |                   |                  |                   |                  | Y    | 1408.670299        | 704.838788      | 1391.643750 | 696.325513       | <b>1390.659734</b> | 695.833505       | 13 |
| 5  | <b>618.349740</b>  | 309.678508      |                   |                  | 600.339175        | 300.673226       | D    | <b>1245.606970</b> | 623.307123      | 1228.580421 | 614.793849       | 1227.596405        | 614.301841       | 12 |
| 6  | 689.386854         | 345.197065      |                   |                  | <b>671.376289</b> | 336.191782       | A    | 1130.580027        | 565.793652      | 1113.553478 | 557.280377       | 1112.569462        | 556.788369       | 11 |
| 7  | 776.418882         | 388.713079      |                   |                  | 758.408317        | 379.707796       | S    | <b>1059.542913</b> | 530.275095      | 1042.516364 | 521.761820       | 1041.532348        | 521.269812       | 10 |
| 8  | 890.461809         | 445.734542      | <b>873.435260</b> | 437.221268       | 872.451244        | 436.729260       | N    | <b>972.510885</b>  | 486.759081      | 955.484336  | 478.245806       | 954.500320         | 477.753798       | 9  |
| 9  | <b>1003.545873</b> | 502.276574      | 986.519324        | 493.763300       | 985.535308        | 493.271292       | L    | 858.467958         | 429.737617      | 841.441409  | 421.224343       | 840.457393         | 420.732335       | 8  |
| 10 | <b>1132.588466</b> | 566.797871      | 1115.561917       | 558.284597       | 1114.577901       | 557.792588       | E    | <b>745.383894</b>  | 373.195585      | 728.357345  | 364.682311       | 727.373329         | 364.190303       | 7  |
| 11 | <b>1233.636145</b> | 617.321710      | 1216.609596       | 608.808436       | 1215.625580       | 608.316428       | T    | <b>616.341301</b>  | 308.674289      | 599.314752  | 300.161014       | 598.330736         | 299.669006       | 6  |
| 12 | <b>1290.657609</b> | 645.832442      | 1273.631060       | 637.319168       | 1272.647044       | 636.827160       | G    | <b>515.293622</b>  | 258.150449      | 498.267073  | 249.637175       | 497.283057         | 249.145167       | 5  |
| 13 | <b>1389.726023</b> | 695.366649      | 1372.699474       | 686.853375       | 1371.715458       | 686.361367       | V    | <b>458.272158</b>  | 229.639717      | 441.245609  | 221.126443       | 440.261593         | 220.634435       | 4  |
| 14 | <b>1486.778787</b> | 743.893032      | 1469.752238       | 735.379757       | 1468.768222       | 734.887749       | P    | <b>359.203744</b>  | 180.105510      | 342.177195  | 171.592236       | <b>341.193179</b>  | 171.100228       | 3  |
| 15 | <b>1573.810815</b> | 787.409046      | 1556.784266       | 778.895771       | 1555.800250       | 778.403763       | S    | 262.150980         | 131.579128      | 245.124431  | 123.065854       | 244.140415         | 122.573846       | 2  |
| 16 |                    |                 |                   |                  |                   |                  | R    | 175.118952         | 88.063114       | 158.092403  | 79.549839        |                    |                  | 1  |

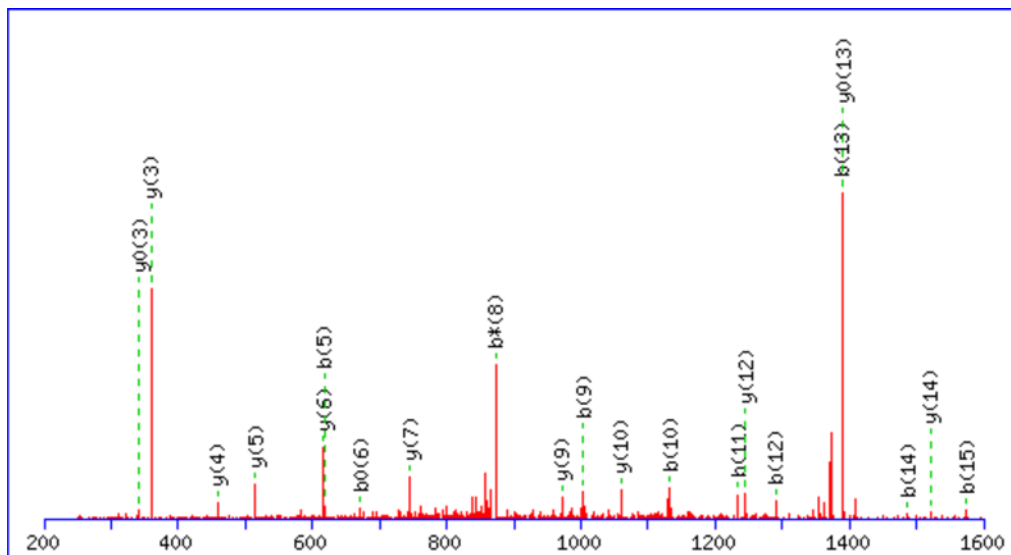

## Peptide View

MS/MS Fragmentation of **TVAGPVGGSLSVQCPYEKEHR**

Found in **IPI00414784**, Tax\_Id=9606 Gene\_Symbol=CD300A Isoform 1 of CMRF35-like molecule 8

**Experiment:** 37 - OPC-1 **Fraction:** OPC-1

Match to Query 15390: 2270.109448 from(1136.062000,2+)

Title: OECHL100310\_19.10003.10003.2.dta

Data file \\BOROMIR\Masse\Data LTQ-Orbitrap\Chrystelle Lacroix\Etude clinique sJPU\OECHL100310\_19.raw

**Monoisotopic mass of neutral peptide Mr(calc):** 2270.111374 **Fixed modifications:** Carbamidomethyl (C) (apply to specified residues or termini only) **Ions Score:** 83

**Expect:** 9.2e-007 **Matches :** 22/212 fragment ions using 34 most intense peaks ([help](#))

| # | b          | b <sup>++</sup> | b* | b* <sup>++</sup> | b <sup>0</sup> | b <sup>0++</sup> | Seq. | y           | y <sup>++</sup> | y*          | y* <sup>++</sup> | y <sup>0</sup> | y <sup>0++</sup> |
|---|------------|-----------------|----|------------------|----------------|------------------|------|-------------|-----------------|-------------|------------------|----------------|------------------|
| 1 | 102.054955 | 51.531116       |    |                  | 84.044390      | 42.525833        | T    |             |                 |             |                  |                |                  |
| 2 | 201.123369 | 101.065322      |    |                  | 183.112804     | 92.060040        | V    | 2170.070965 | 1085.539120     | 2153.044416 | 1077.025846      | 2152.060400    | 1076.5338        |
| 3 | 272.160483 | 136.583879      |    |                  | 254.149918     | 127.578597       | A    | 2071.002551 | 1036.004913     | 2053.976002 | 1027.491639      | 2052.991986    | 1026.9996        |
| 4 | 329.181947 | 165.094611      |    |                  | 311.171382     | 156.089329       | G    | 1999.965437 | 1000.486357     | 1982.938888 | 991.973082       | 1981.954872    | 991.4810         |
| 5 | 426.234711 | 213.620994      |    |                  | 408.224146     | 204.615711       | P    | 1942.943973 | 971.975625      | 1925.917424 | 963.462350       | 1924.933408    | 962.9703         |
| 6 | 525.303125 | 263.155201      |    |                  | 507.292560     | 254.149918       | V    | 1845.891209 | 923.449243      | 1828.864660 | 914.935968       | 1827.880644    | 914.4439         |

|    |             |             |             |             |             |             |   |             |            |             |            |             |          |
|----|-------------|-------------|-------------|-------------|-------------|-------------|---|-------------|------------|-------------|------------|-------------|----------|
| 7  | 582.324589  | 291.665933  |             |             | 564.314024  | 282.660650  | G | 1746.822795 | 873.915036 | 1729.796246 | 865.401761 | 1728.812230 | 864.9097 |
| 8  | 639.346053  | 320.176665  |             |             | 621.335488  | 311.171382  | G | 1689.801331 | 845.404304 | 1672.774782 | 836.891029 | 1671.790766 | 836.3990 |
| 9  | 726.378081  | 363.692679  |             |             | 708.367516  | 354.687396  | S | 1632.779867 | 816.893572 | 1615.753318 | 808.380297 | 1614.769302 | 807.8882 |
| 10 | 839.462145  | 420.234711  |             |             | 821.451580  | 411.229428  | L | 1545.747839 | 773.377558 | 1528.721290 | 764.864283 | 1527.737274 | 764.3722 |
| 11 | 926.494173  | 463.750725  |             |             | 908.483608  | 454.745442  | S | 1432.663775 | 716.835526 | 1415.637226 | 708.322251 | 1414.653210 | 707.8302 |
| 12 | 1025.562587 | 513.284932  |             |             | 1007.552022 | 504.279649  | V | 1345.631747 | 673.319512 | 1328.605198 | 664.806237 | 1327.621182 | 664.3142 |
| 13 | 1153.621165 | 577.314221  | 1136.594616 | 568.800946  | 1135.610600 | 568.308938  | Q | 1246.563333 | 623.785305 | 1229.536784 | 615.272030 | 1228.552768 | 614.7800 |
| 14 | 1313.651814 | 657.329545  | 1296.625265 | 648.816271  | 1295.641249 | 648.324263  | C | 1118.504755 | 559.756016 | 1101.478206 | 551.242741 | 1100.494190 | 550.7507 |
| 15 | 1410.704578 | 705.855927  | 1393.678029 | 697.342653  | 1392.694013 | 696.850645  | P | 958.474106  | 479.740691 | 941.447557  | 471.227417 | 940.463541  | 470.7354 |
| 16 | 1573.767907 | 787.387592  | 1556.741358 | 778.874317  | 1555.757342 | 778.382309  | Y | 861.421342  | 431.214309 | 844.394793  | 422.701035 | 843.410777  | 422.2090 |
| 17 | 1702.810500 | 851.908888  | 1685.783951 | 843.395614  | 1684.799935 | 842.903606  | E | 698.358013  | 349.682645 | 681.331464  | 341.169370 | 680.347448  | 340.6773 |
| 18 | 1830.905463 | 915.956370  | 1813.878914 | 907.443095  | 1812.894898 | 906.951087  | K | 569.315420  | 285.161348 | 552.288871  | 276.648074 | 551.304855  | 276.1560 |
| 19 | 1959.948056 | 980.477666  | 1942.921507 | 971.964392  | 1941.937491 | 971.472384  | E | 441.220457  | 221.113867 | 424.193908  | 212.600592 | 423.209892  | 212.1085 |
| 20 | 2097.006968 | 1049.007122 | 2079.980419 | 1040.493847 | 2078.996403 | 1040.001840 | H | 312.177864  | 156.592570 | 295.151315  | 148.079295 |             |          |
| 21 |             |             |             |             |             |             | R | 175.118952  | 88.063114  | 158.092403  | 79.549839  |             |          |

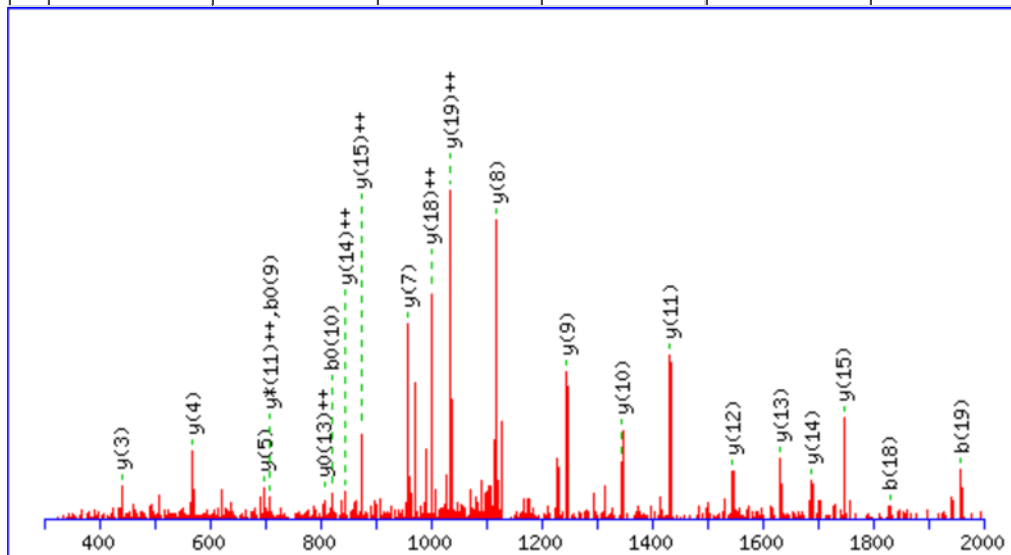

## Peptide View

MS/MS Fragmentation of **AQLDSADIPKAR**Found in **IPI00026303**, Tax\_Id=9606 Gene\_Symbol=PI15 Peptidase inhibitor 15**Experiment:** 37 - OPC-1 **Fraction:** OPC-1

Match to Query 6731: 1283.684248 from(642.849400,2+)

Title: OECHL100310\_19.7840.7840.2.dta

Data file \\BOROMIR\Masse\Data LTQ-Orbitrap\Chrystelle Lacroix\Etude clinique sJPU\OECHL100310\_19.raw

**Monoisotopic mass of neutral peptide Mr(calc):** 1283.683334**Fixed modifications:** Carbamidomethyl (C) (apply to specified residues or termini only)**Ions Score:** 71**Expect:** 5.9e-006**Matches :** 22/114 fragment ions using 44 most intense peaks ([help](#))

| #  | b                  | b <sup>++</sup> | b <sup>*</sup> | b <sup>*++</sup> | b <sup>0</sup> | b <sup>0++</sup> | Seq. | y                  | y <sup>++</sup>   | y <sup>*</sup>    | y <sup>*++</sup> | y <sup>0</sup>     | y <sup>0++</sup> | #  |
|----|--------------------|-----------------|----------------|------------------|----------------|------------------|------|--------------------|-------------------|-------------------|------------------|--------------------|------------------|----|
| 1  | 72.044390          | 36.525833       |                |                  |                |                  | A    |                    |                   |                   |                  |                    |                  | 12 |
| 2  | <b>200.102968</b>  | 100.555122      | 183.076419     | 92.041848        |                |                  | Q    | <b>1213.653527</b> | 607.330402        | 1196.626978       | 598.817127       | 1195.642962        | 598.325119       | 11 |
| 3  | <b>313.187032</b>  | 157.097154      | 296.160483     | 148.583879       |                |                  | L    | <b>1085.594949</b> | <b>543.301113</b> | 1068.568400       | 534.787838       | <b>1067.584384</b> | 534.295830       | 10 |
| 4  | <b>428.213975</b>  | 214.610626      | 411.187426     | 206.097351       | 410.203410     | 205.605343       | D    | <b>972.510885</b>  | <b>486.759081</b> | <b>955.484336</b> | 478.245806       | <b>954.500320</b>  | 477.753798       | 9  |
| 5  | 515.246003         | 258.126640      | 498.219454     | 249.613365       | 497.235438     | 249.121357       | S    | <b>857.483942</b>  | <b>429.245609</b> | 840.457393        | 420.732335       | 839.473377         | 420.240327       | 8  |
| 6  | 586.283117         | 293.645197      | 569.256568     | 285.131922       | 568.272552     | 284.639914       | A    | <b>770.451914</b>  | 385.729595        | 753.425365        | 377.216321       | 752.441349         | 376.724313       | 7  |
| 7  | <b>701.310060</b>  | 351.158668      | 684.283511     | 342.645394       | 683.299495     | 342.153386       | D    | <b>699.414800</b>  | 350.211038        | 682.388251        | 341.697764       | 681.404235         | 341.205756       | 6  |
| 8  | <b>814.394124</b>  | 407.700700      | 797.367575     | 399.187426       | 796.383559     | 398.695418       | I    | <b>584.387857</b>  | 292.697567        | 567.361308        | 284.184292       |                    |                  | 5  |
| 9  | 911.446888         | 456.227082      | 894.420339     | 447.713808       | 893.436323     | 447.221800       | P    | <b>471.303793</b>  | 236.155535        | 454.277244        | 227.642260       |                    |                  | 4  |
| 10 | 1039.541851        | 520.274564      | 1022.515302    | 511.761289       | 1021.531286    | 511.269281       | K    | <b>374.251029</b>  | 187.629153        | 357.224480        | 179.115878       |                    |                  | 3  |
| 11 | <b>1110.578965</b> | 555.793121      | 1093.552416    | 547.279846       | 1092.568400    | 546.787838       | A    | <b>246.156066</b>  | 123.581671        | 229.129517        | 115.068396       |                    |                  | 2  |
| 12 |                    |                 |                |                  |                |                  | R    | 175.118952         | 88.063114         | 158.092403        | 79.549839        |                    |                  | 1  |



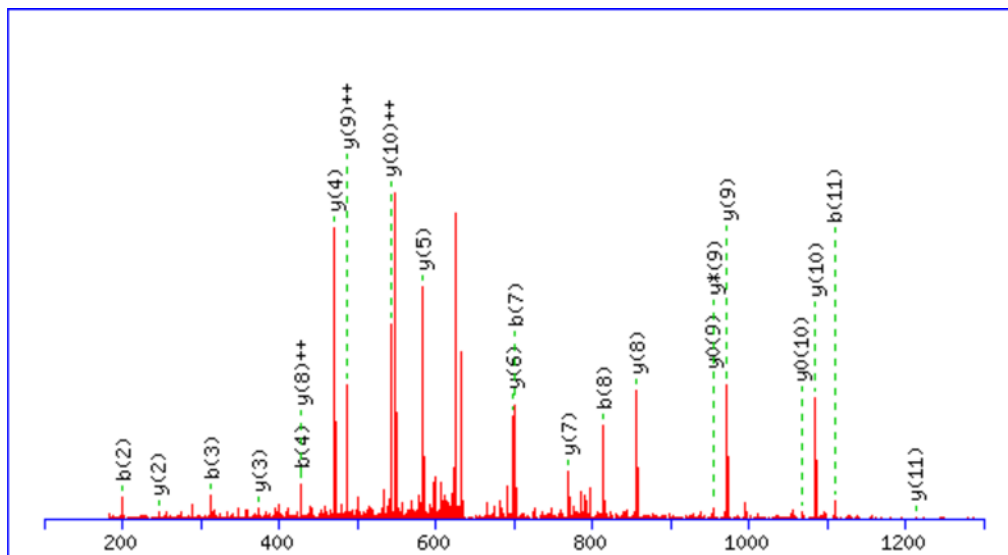

## Peptide View

MS/MS Fragmentation of **GLAEAAGPR**

Found in **IPI00290826**, Tax\_Id=9606 Gene\_Symbol=FAM174A Membrane protein FAM174A

**Experiment:** 37 - OPC-1 **Fraction:** OPC-1

Match to Query 962: 840.446048 from(421.230300,2+)

Title: OECHL100310\_19.4317.4317.2.dta

Data file \\BOROMIR\Masse\Data LTQ-Orbitrap\Chrystelle Lacroix\Etude clinique sJPU\OECHL100310\_19.raw

**Monoisotopic mass of neutral peptide Mr(calc):** 840.445343 **Fixed modifications:** Carbamidomethyl (C) (apply to specified residues or termini only) **Ions Score:** 51

**Expect:** 0.00052 **Matches :** 10/64 fragment ions using 14 most intense peaks ([help](#))

| # | b                 | b <sup>++</sup> | b <sup>0</sup> | b <sup>0++</sup> | Seq. | y                 | y <sup>++</sup> | y <sup>*</sup> | y <sup>*++</sup> | y <sup>0</sup> | y <sup>0++</sup> | # |
|---|-------------------|-----------------|----------------|------------------|------|-------------------|-----------------|----------------|------------------|----------------|------------------|---|
| 1 | 58.028740         | 29.518008       |                |                  | G    |                   |                 |                |                  |                |                  | 9 |
| 2 | <b>171.112804</b> | 86.060040       |                |                  | L    | 784.431179        | 392.719228      | 767.404630     | 384.205953       | 766.420614     | 383.713945       | 8 |
| 3 | <b>242.149918</b> | 121.578597      |                |                  | A    | <b>671.347115</b> | 336.177196      | 654.320566     | 327.663921       | 653.336550     | 327.171913       | 7 |
| 4 | 371.192511        | 186.099894      | 353.181946     | 177.094611       | E    | <b>600.310001</b> | 300.658639      | 583.283452     | 292.145364       | 582.299436     | 291.653356       | 6 |
| 5 | 442.229625        | 221.618450      | 424.219060     | 212.613168       | A    | <b>471.267408</b> | 236.137342      | 454.240859     | 227.624067       |                |                  | 5 |
| 6 | <b>513.266739</b> | 257.137008      | 495.256174     | 248.131725       | A    | <b>400.230294</b> | 200.618785      | 383.203745     | 192.105510       |                |                  | 4 |

|   |                   |            |            |            |   |                   |            |            |            |  |  |   |
|---|-------------------|------------|------------|------------|---|-------------------|------------|------------|------------|--|--|---|
| 7 | <b>570.288203</b> | 285.647740 | 552.277638 | 276.642457 | G | <b>329.193180</b> | 165.100228 | 312.166631 | 156.586953 |  |  | 3 |
| 8 | 667.340967        | 334.174122 | 649.330402 | 325.168839 | P | <b>272.171716</b> | 136.589496 | 255.145167 | 128.076221 |  |  | 2 |
| 9 |                   |            |            |            | R | 175.118952        | 88.063114  | 158.092403 | 79.549839  |  |  | 1 |

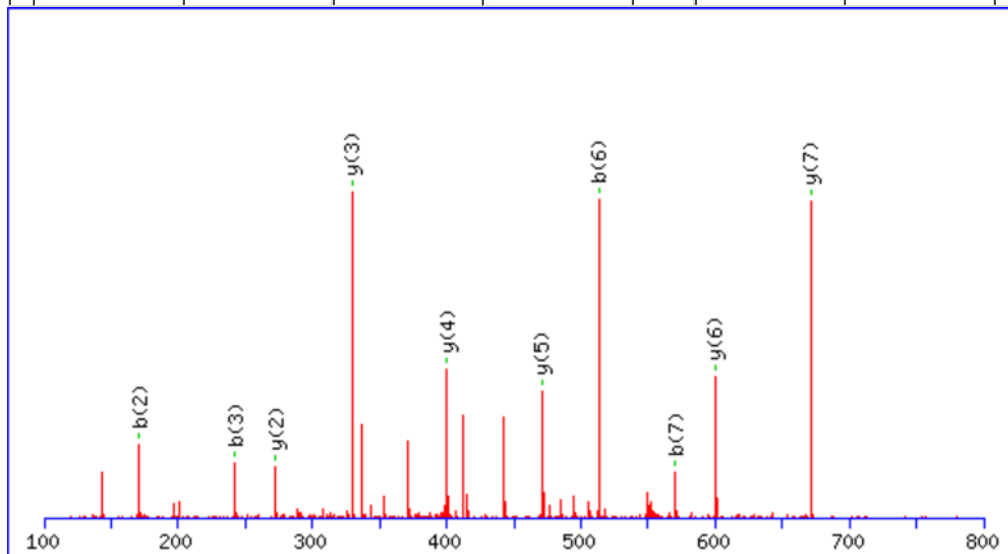

## Peptide View

MS/MS Fragmentation of **ATGDIKVTESEIK**

Found in **IPI00302614**, Tax\_Id=9606 Gene\_Symbol=VTCN1 V-set domain containing T cell activation inhibitor 1

**Experiment:** 37 - OPC-1 **Fraction:** OPC-1

Match to Query 7951: 1389.735848 from(695.875200,2+)

Title: OECHL100310\_19.8095.8095.2.dta

Data file \\BOROMIR\Masse\Data LTQ-Orbitrap\Chrystelle Lacroix\Etude clinique sJPU\OECHL100310\_19.raw

**Monoisotopic mass of neutral peptide Mr(calc):** 1389.735107**Fixed modifications:** Carbamidomethyl (C) (apply to specified residues or termini only)**Ions Score:** 58

**Expect:** 0.00016**Matches :** 12/128 fragment ions using 12 most intense peaks ([help](#))

| # | b          | b <sup>++</sup> | b* | b <sup>*++</sup> | b <sup>0</sup> | b <sup>0++</sup> | Seq. | y                  | y <sup>++</sup>   | y*          | y <sup>*++</sup> | y <sup>0</sup> | y <sup>0++</sup> | #  |
|---|------------|-----------------|----|------------------|----------------|------------------|------|--------------------|-------------------|-------------|------------------|----------------|------------------|----|
| 1 | 72.044390  | 36.525833       |    |                  |                |                  | A    |                    |                   |             |                  |                |                  | 13 |
| 2 | 173.092069 | 87.049672       |    |                  | 155.081504     | 78.044390        | T    | <b>1319.705288</b> | 660.356282        | 1302.678739 | 651.843008       | 1301.694723    | 651.350999       | 12 |
| 3 | 230.113533 | 115.560404      |    |                  | 212.102968     | 106.555122       | G    | 1218.657609        | <b>609.832442</b> | 1201.631060 | 601.319168       | 1200.647044    | 600.827160       | 11 |

|    |                    |            |             |            |             |            |          |                    |                   |             |                   |             |            |           |
|----|--------------------|------------|-------------|------------|-------------|------------|----------|--------------------|-------------------|-------------|-------------------|-------------|------------|-----------|
| 4  | <b>345.140476</b>  | 173.073876 |             |            | 327.129911  | 164.068593 | <b>D</b> | 1161.636145        | 581.321710        | 1144.609596 | 572.808436        | 1143.625580 | 572.316428 | <b>10</b> |
| 5  | 458.224540         | 229.615908 |             |            | 440.213975  | 220.610626 | <b>I</b> | <b>1046.609202</b> | <b>523.808239</b> | 1029.582653 | 515.294964        | 1028.598637 | 514.802956 | <b>9</b>  |
| 6  | 586.319503         | 293.663390 | 569.292954  | 285.150115 | 568.308938  | 284.658107 | <b>K</b> | <b>933.525138</b>  | 467.266207        | 916.498589  | 458.752932        | 915.514573  | 458.260924 | <b>8</b>  |
| 7  | 685.387917         | 343.197597 | 668.361368  | 334.684322 | 667.377352  | 334.192314 | <b>V</b> | <b>805.430175</b>  | 403.218725        | 788.403626  | 394.705451        | 787.419610  | 394.213443 | <b>7</b>  |
| 8  | 786.435596         | 393.721436 | 769.409047  | 385.208162 | 768.425031  | 384.716154 | <b>T</b> | 706.361761         | 353.684518        | 689.335212  | <b>345.171244</b> | 688.351196  | 344.679236 | <b>6</b>  |
| 9  | 915.478189         | 458.242733 | 898.451640  | 449.729458 | 897.467624  | 449.237450 | <b>E</b> | 605.314082         | 303.160679        | 588.287533  | 294.647404        | 587.303517  | 294.155396 | <b>5</b>  |
| 10 | 1002.510217        | 501.758747 | 985.483668  | 493.245472 | 984.499652  | 492.753464 | <b>S</b> | <b>476.271489</b>  | 238.639382        | 459.244940  | 230.126108        | 458.260924  | 229.634100 | <b>4</b>  |
| 11 | <b>1131.552810</b> | 566.280043 | 1114.526261 | 557.766769 | 1113.542245 | 557.274760 | <b>E</b> | 389.239461         | 195.123368        | 372.212912  | 186.610094        | 371.228896  | 186.118086 | <b>3</b>  |
| 12 | <b>1244.636874</b> | 622.822075 | 1227.610325 | 614.308800 | 1226.626309 | 613.816792 | <b>I</b> | <b>260.196868</b>  | 130.602072        | 243.170319  | 122.088797        |             |            | <b>2</b>  |
| 13 |                    |            |             |            |             |            | <b>K</b> | 147.112804         | 74.060040         | 130.086255  | 65.546765         |             |            | <b>1</b>  |

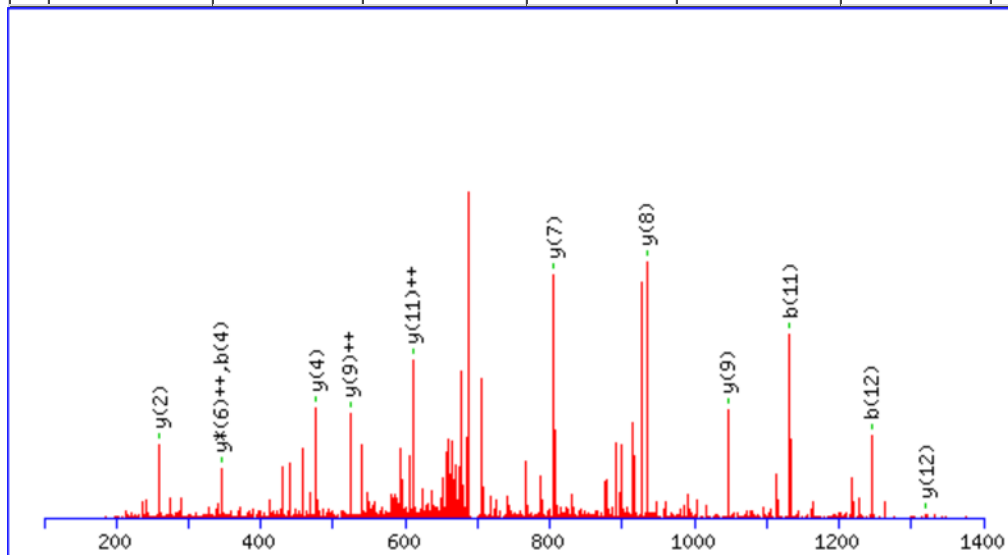

## Peptide View

MS/MS Fragmentation of **ASGVAVSDGVIKVFNDMK**

Found in **IP100012011**, Tax\_Id=9606 Gene\_Symbol=CFL1 Cofilin-1

**Experiment: 37 - OPC-1 Fraction: OPC-1**

Match to Query 13101: 1877.955448 from(939.985000,2+)

Title: OECHL100310\_19.20025.20025.2.dta

Data file \\BOROMIR\Masse\Data LTQ-Orbitrap\Chrystelle Lacroix\Etude clinique sJPU\OECHL100310\_19.raw

**Monoisotopic mass of neutral peptide Mr(calc):** 1877.955704**Fixed modifications:** Carbamidomethyl (C) (apply to specified residues or termini only)**Variable modifications:** N-term : Acetyl (N-term)**Ions Score:** 55 **Expect:** 0.00044**Matches :** 43/176 fragment ions using 91 most intense peaks ([help](#))

| #  | b           | b <sup>++</sup> | b*          | b <sup>***</sup> | b <sup>0</sup> | b <sup>0++</sup> | Seq. | y           | y <sup>++</sup> | y*          | y <sup>***</sup> | y <sup>0</sup> | y <sup>0++</sup> | #  |
|----|-------------|-----------------|-------------|------------------|----------------|------------------|------|-------------|-----------------|-------------|------------------|----------------|------------------|----|
| 1  | 114.054955  | 57.531116       |             |                  |                |                  | A    |             |                 |             |                  |                |                  | 18 |
| 2  | 201.086983  | 101.047130      |             |                  | 183.076418     | 92.041847        | S    | 1765.915297 | 883.461287      | 1748.888748 | 874.948012       | 1747.904732    | 874.456004       | 17 |
| 3  | 258.108447  | 129.557861      |             |                  | 240.097882     | 120.552579       | G    | 1678.883269 | 839.945273      | 1661.856720 | 831.431998       | 1660.872704    | 830.939990       | 16 |
| 4  | 357.176861  | 179.092068      |             |                  | 339.166296     | 170.086786       | V    | 1621.861805 | 811.434541      | 1604.835256 | 802.921266       | 1603.851240    | 802.429258       | 15 |
| 5  | 428.213975  | 214.610626      |             |                  | 410.203410     | 205.605343       | A    | 1522.793391 | 761.900334      | 1505.766842 | 753.387059       | 1504.782826    | 752.895051       | 14 |
| 6  | 527.282389  | 264.144833      |             |                  | 509.271824     | 255.139550       | V    | 1451.756277 | 726.381777      | 1434.729728 | 717.868502       | 1433.745712    | 717.376494       | 13 |
| 7  | 614.314417  | 307.660847      |             |                  | 596.303852     | 298.655564       | S    | 1352.687863 | 676.847570      | 1335.661314 | 668.334295       | 1334.677298    | 667.842287       | 12 |
| 8  | 729.341360  | 365.174318      |             |                  | 711.330795     | 356.169036       | D    | 1265.655835 | 633.331556      | 1248.629286 | 624.818281       | 1247.645270    | 624.326273       | 11 |
| 9  | 786.362824  | 393.685050      |             |                  | 768.352259     | 384.679768       | G    | 1150.628892 | 575.818084      | 1133.602343 | 567.304810       | 1132.618327    | 566.812802       | 10 |
| 10 | 885.431238  | 443.219257      |             |                  | 867.420673     | 434.213975       | V    | 1093.607428 | 547.307352      | 1076.580879 | 538.794078       | 1075.596863    | 538.302070       | 9  |
| 11 | 998.515302  | 499.761289      |             |                  | 980.504737     | 490.756007       | I    | 994.539014  | 497.773145      | 977.512465  | 489.259871       | 976.528449     | 488.767863       | 8  |
| 12 | 1126.610265 | 563.808771      | 1109.583716 | 555.295496       | 1108.599700    | 554.803488       | K    | 881.454950  | 441.231113      | 864.428401  | 432.717839       | 863.444385     | 432.225831       | 7  |
| 13 | 1225.678679 | 613.342978      | 1208.652130 | 604.829703       | 1207.668114    | 604.337695       | V    | 753.359987  | 377.183632      | 736.333438  | 368.670357       | 735.349422     | 368.178349       | 6  |
| 14 | 1372.747093 | 686.877185      | 1355.720544 | 678.363910       | 1354.736528    | 677.871902       | F    | 654.291573  | 327.649425      | 637.265024  | 319.136150       | 636.281008     | 318.644142       | 5  |
| 15 | 1486.790020 | 743.898648      | 1469.763471 | 735.385374       | 1468.779455    | 734.893366       | N    | 507.223159  | 254.115218      | 490.196610  | 245.601943       | 489.212594     | 245.109935       | 4  |
| 16 | 1601.816963 | 801.412120      | 1584.790414 | 792.898845       | 1583.806398    | 792.406837       | D    | 393.180232  | 197.093754      | 376.153683  | 188.580480       | 375.169667     | 188.088472       | 3  |
| 17 | 1732.857448 | 866.932362      | 1715.830899 | 858.419088       | 1714.846883    | 857.927080       | M    | 278.153289  | 139.580282      | 261.126740  | 131.067008       |                |                  | 2  |
| 18 |             |                 |             |                  |                |                  | K    | 147.112804  | 74.060040       | 130.086255  | 65.546765        |                |                  | 1  |

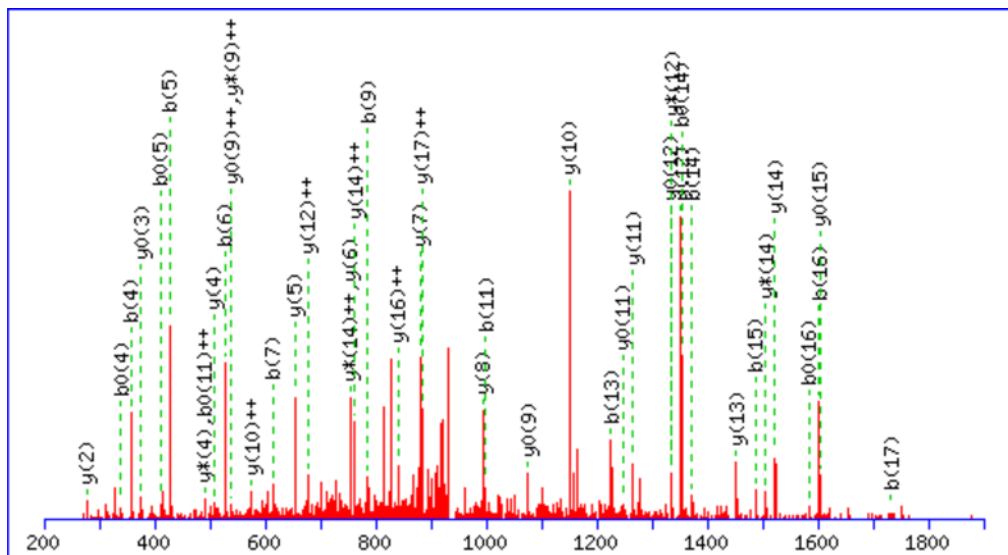

## Peptide View

MS/MS Fragmentation of **TGAVYVAEIGAK**

Found in **IPI00552937**, Tax\_Id=9606 Gene\_Symbol=NHLRC3 NHL repeat-containing protein 3

**Experiment:** 37 - OPC-1 **Fraction:** OPC-1

Match to Query 5127: 1177.632848 from(589.823700,2+)

Title: OECHL100310\_19.10879.10879.2.dta

Data file \\BOROMIR\Masse\Data LTQ-Orbitrap\Chrystelle Lacroix\Etude clinique sJPU\OECHL100310\_19.raw

**Monoisotopic mass of neutral peptide Mr(calc):** 1177.634277 **Fixed modifications:** Carbamidomethyl (C) (apply to specified residues or termini only) **Ions Score:** 53

**Expect:** 0.00035 **Matches :** 15/102 fragment ions using 30 most intense peaks ([help](#))

| # | b                 | b <sup>++</sup> | b <sup>0</sup>    | b <sup>0++</sup> | Seq. | y                  | y <sup>++</sup> | y <sup>*</sup> | y <sup>*++</sup> | y <sup>0</sup> | y <sup>0++</sup> | #  |
|---|-------------------|-----------------|-------------------|------------------|------|--------------------|-----------------|----------------|------------------|----------------|------------------|----|
| 1 | 102.054955        | 51.531116       | 84.044390         | 42.525833        | T    |                    |                 |                |                  |                |                  | 12 |
| 2 | 159.076419        | 80.041847       | 141.065854        | 71.036565        | G    | 1077.593888        | 539.300582      | 1060.567339    | 530.787308       | 1059.583323    | 530.295300       | 11 |
| 3 | <b>230.113533</b> | 115.560404      | 212.102968        | 106.555122       | A    | <b>1020.572424</b> | 510.789850      | 1003.545875    | 502.276576       | 1002.561859    | 501.784568       | 10 |
| 4 | <b>329.181947</b> | 165.094611      | 311.171382        | 156.089329       | V    | <b>949.535310</b>  | 475.271293      | 932.508761     | 466.758019       | 931.524745     | 466.266011       | 9  |
| 5 | <b>492.245276</b> | 246.626276      | <b>474.234711</b> | 237.620994       | Y    | <b>850.466896</b>  | 425.737086      | 833.440347     | 417.223812       | 832.456331     | 416.731804       | 8  |
| 6 | 591.313690        | 296.160483      | 573.303125        | 287.155201       | V    | <b>687.403567</b>  | 344.205422      | 670.377018     | 335.692147       | 669.393002     | 335.200139       | 7  |

|    |             |            |             |            |   |            |            |            |            |            |            |   |
|----|-------------|------------|-------------|------------|---|------------|------------|------------|------------|------------|------------|---|
| 7  | 662.350804  | 331.679040 | 644.340239  | 322.673758 | A | 588.335153 | 294.671215 | 571.308604 | 286.157940 | 570.324588 | 285.665932 | 6 |
| 8  | 791.393397  | 396.200337 | 773.382832  | 387.195054 | E | 517.298039 | 259.152658 | 500.271490 | 250.639383 | 499.287474 | 250.147375 | 5 |
| 9  | 904.477461  | 452.742369 | 886.466896  | 443.737086 | I | 388.255446 | 194.631361 | 371.228897 | 186.118087 |            |            | 4 |
| 10 | 961.498925  | 481.253101 | 943.488360  | 472.247818 | G | 275.171382 | 138.089329 | 258.144833 | 129.576055 |            |            | 3 |
| 11 | 1032.536039 | 516.771658 | 1014.525474 | 507.766375 | A | 218.149918 | 109.578597 | 201.123369 | 101.065322 |            |            | 2 |
| 12 |             |            |             |            | K | 147.112804 | 74.060040  | 130.086255 | 65.546765  |            |            | 1 |

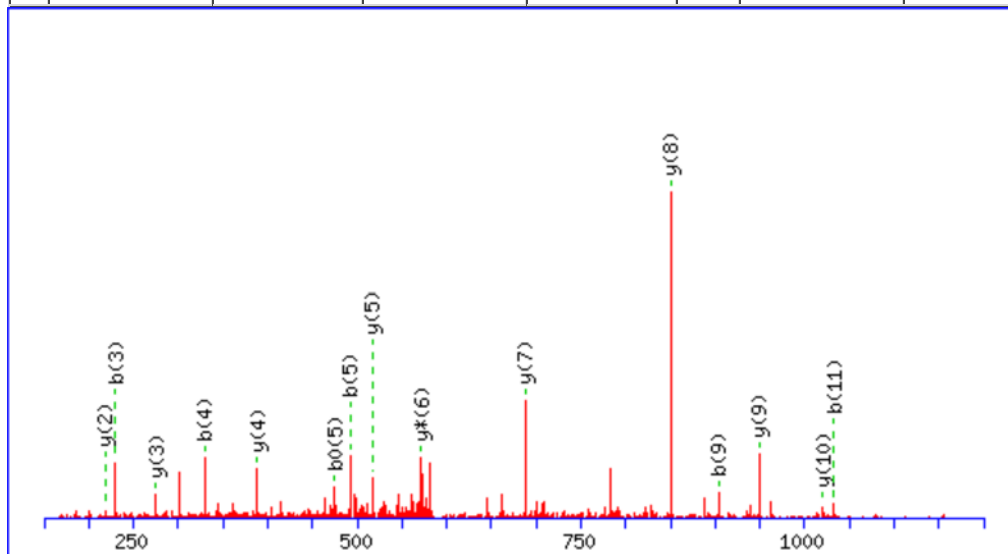

## Peptide View

MS/MS Fragmentation of **LWCATTSNFDSKK**

Found in **IP100027509**, Tax\_Id=9606 Gene\_Symbol=MMP9 Matrix metalloproteinase-9

Experiment: 37 - OPC-1 Fraction: OPC-1

Match to Query 11151: 1671.756848 from(836.885700,2+)

Title: OECHL100310\_19.10306.10306.2.dta

Data file \\BOROMIR\Masse\Data LTQ-Orbitrap\Chrystelle Lacroix\Etude clinique sJPU\OECHL100310\_19.raw

**Monoisotopic mass of neutral peptide Mr(calc):** 1671.756271 **Fixed modifications:** Carbamidomethyl (C) (apply to specified residues or termini only) **Ions Score:** 51

**Expect:** 0.00068 **Matches :** 15/130 fragment ions using 29 most intense peaks ([help](#))

| # | b | b <sup>++</sup> | b* | b <sup>*++</sup> | b <sup>0</sup> | b <sup>0++</sup> | Seq. | y | y <sup>++</sup> | y* | y <sup>*++</sup> | y <sup>0</sup> | y <sup>0++</sup> | # |
|---|---|-----------------|----|------------------|----------------|------------------|------|---|-----------------|----|------------------|----------------|------------------|---|
|---|---|-----------------|----|------------------|----------------|------------------|------|---|-----------------|----|------------------|----------------|------------------|---|

|    |                    |            |             |            |             |            |  |   |                    |                   |             |                   |             |                   |  |  |  |  |  |    |
|----|--------------------|------------|-------------|------------|-------------|------------|--|---|--------------------|-------------------|-------------|-------------------|-------------|-------------------|--|--|--|--|--|----|
| 1  | 114.091340         | 57.549308  |             |            |             |            |  | L |                    |                   |             |                   |             |                   |  |  |  |  |  | 14 |
| 2  | <b>300.170653</b>  | 150.588965 |             |            |             |            |  | W | 1559.679484        | 780.343380        | 1542.652935 | <b>771.830106</b> | 1541.668919 | 771.338098        |  |  |  |  |  | 13 |
| 3  | 460.201302         | 230.604289 |             |            |             |            |  | C | <b>1373.600171</b> | <b>687.303724</b> | 1356.573622 | <b>678.790449</b> | 1355.589606 | <b>678.298441</b> |  |  |  |  |  | 12 |
| 4  | 531.238416         | 266.122846 |             |            |             |            |  | A | <b>1213.569522</b> | 607.288399        | 1196.542973 | 598.775125        | 1195.558957 | 598.283117        |  |  |  |  |  | 11 |
| 5  | 632.286095         | 316.646686 |             |            | 614.275530  | 307.641403 |  | T | <b>1142.532408</b> | 571.769842        | 1125.505859 | 563.256568        | 1124.521843 | 562.764560        |  |  |  |  |  | 10 |
| 6  | 733.333774         | 367.170525 |             |            | 715.323209  | 358.165243 |  | T | <b>1041.484729</b> | 521.246003        | 1024.458180 | 512.732728        | 1023.474164 | 512.240720        |  |  |  |  |  | 9  |
| 7  | 820.365802         | 410.686539 |             |            | 802.355237  | 401.681257 |  | S | <b>940.437050</b>  | 470.722163        | 923.410501  | 462.208889        | 922.426485  | 461.716881        |  |  |  |  |  | 8  |
| 8  | 934.408729         | 467.708003 | 917.382180  | 459.194728 | 916.398164  | 458.702720 |  | N | <b>853.405022</b>  | 427.206149        | 836.378473  | 418.692875        | 835.394457  | 418.200867        |  |  |  |  |  | 7  |
| 9  | 1081.477143        | 541.242210 | 1064.450594 | 532.728935 | 1063.466578 | 532.236927 |  | F | 739.362095         | 370.184686        | 722.335546  | 361.671411        | 721.351530  | 361.179403        |  |  |  |  |  | 6  |
| 10 | 1196.504086        | 598.755681 | 1179.477537 | 590.242407 | 1178.493521 | 589.750399 |  | D | <b>592.293681</b>  | 296.650479        | 575.267132  | 288.137204        | 574.283116  | 287.645196        |  |  |  |  |  | 5  |
| 11 | 1283.536114        | 642.271695 | 1266.509565 | 633.758421 | 1265.525549 | 633.266413 |  | S | <b>477.266738</b>  | 239.137007        | 460.240189  | 230.623733        | 459.256173  | 230.131725        |  |  |  |  |  | 4  |
| 12 | 1398.563057        | 699.785167 | 1381.536508 | 691.271892 | 1380.552492 | 690.779884 |  | D | 390.234710         | 195.620993        | 373.208161  | 187.107719        | 372.224145  | 186.615711        |  |  |  |  |  | 3  |
| 13 | <b>1526.658020</b> | 763.832648 | 1509.631471 | 755.319374 | 1508.647455 | 754.827366 |  | K | <b>275.207767</b>  | 138.107521        | 258.181218  | 129.594247        |             |                   |  |  |  |  |  | 2  |
| 14 |                    |            |             |            |             |            |  | K | 147.112804         | 74.060040         | 130.086255  | 65.546765         |             |                   |  |  |  |  |  | 1  |

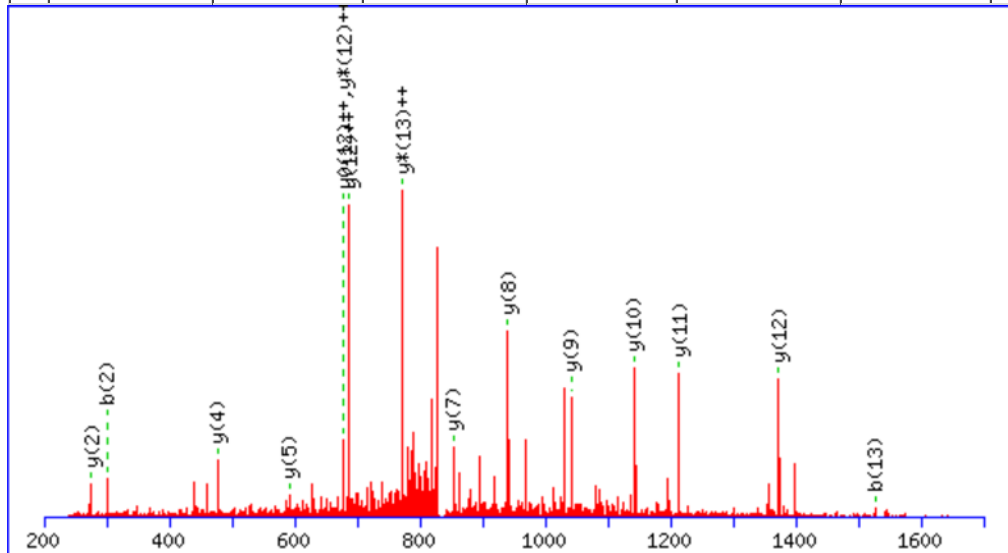

## Peptide View

MS/MS Fragmentation of **GSSWSADLDKCMDASC**RFound in **IPI00010277**, Tax\_Id=9606 Gene\_Symbol=TNFRSF12A Isoform 1 of Tumor necrosis factor receptor superfamily member 12A**Experiment:** 34 - OPB-1 **Fraction:** OPB-1

Match to Query 14582: 2104.807448 from(1053.411000,2+)

Title: OECHL100310\_17.14416.14416.2.dta

Data file \\BOROMIR\Masse\Data LTQ-Orbitrap\Chrystelle Lacroix\Etude clinique sJPU\OECHL100310\_17.raw

**Monoisotopic mass of neutral peptide Mr(calc):** 2104.807083**Fixed modifications:** Carbamidomethyl (C) (apply to specified residues or termini only)**Ions Score:** 59**Expect:** 7.4e-006**Matches :** 21/180 fragment ions using 51 most intense peaks ([help](#))

| #  | b                  | b <sup>++</sup> | b <sup>*</sup> | b <sup>*++</sup> | b <sup>0</sup>     | b <sup>0++</sup> | Seq. | y                  | y <sup>++</sup>   | y <sup>*</sup>     | y <sup>*++</sup> | y <sup>0</sup> | y <sup>0++</sup> |
|----|--------------------|-----------------|----------------|------------------|--------------------|------------------|------|--------------------|-------------------|--------------------|------------------|----------------|------------------|
| 1  | 58.028740          | 29.518008       |                |                  |                    |                  | G    |                    |                   |                    |                  |                |                  |
| 2  | 145.060768         | 73.034022       |                |                  | 127.050203         | 64.028740        | S    | 2048.792893        | 1024.900085       | 2031.766344        | 1016.386810      | 2030.782328    | 1015.894802      |
| 3  | 232.092796         | 116.550036      |                |                  | 214.082231         | 107.544753       | S    | 1961.760865        | 981.384071        | 1944.734316        | 972.870796       | 1943.750300    | 972.378788       |
| 4  | 418.172109         | 209.589693      |                |                  | 400.161544         | 200.584410       | W    | <b>1874.728837</b> | 937.868057        | 1857.702288        | 929.354782       | 1856.718272    | 928.862774       |
| 5  | 505.204137         | 253.105707      |                |                  | 487.193572         | 244.100424       | S    | <b>1688.649524</b> | <b>844.828400</b> | 1671.622975        | 836.315126       | 1670.638959    | 835.823118       |
| 6  | 576.241251         | 288.624264      |                |                  | 558.230686         | 279.618981       | A    | <b>1601.617496</b> | 801.312386        | 1584.590947        | 792.799112       | 1583.606931    | 792.307104       |
| 7  | 691.268194         | 346.137735      |                |                  | 673.257629         | 337.132453       | D    | <b>1530.580382</b> | 765.793829        | 1513.553833        | 757.280555       | 1512.569817    | 756.788547       |
| 8  | 804.352258         | 402.679767      |                |                  | <b>786.341693</b>  | 393.674485       | L    | <b>1415.553439</b> | 708.280358        | 1398.526890        | 699.767083       | 1397.542874    | 699.275075       |
| 9  | 919.379201         | 460.193239      |                |                  | 901.368636         | 451.187956       | D    | <b>1302.469375</b> | 651.738326        | <b>1285.442826</b> | 643.225051       | 1284.458810    | 642.733043       |
| 10 | 1047.474164        | 524.240720      | 1030.447615    | 515.727446       | 1029.463599        | 515.235437       | K    | <b>1187.442432</b> | 594.224854        | 1170.415883        | 585.711580       | 1169.431867    | 585.219572       |
| 11 | <b>1207.504813</b> | 604.256045      | 1190.478264    | 595.742770       | <b>1189.494248</b> | 595.250762       | C    | 1059.347469        | <b>530.177373</b> | 1042.320920        | 521.664098       | 1041.336904    | 521.172090       |
| 12 | 1338.545298        | 669.776287      | 1321.518749    | 661.263013       | 1320.534733        | 660.771005       | M    | <b>899.316820</b>  | 450.162048        | 882.290271         | 441.648774       | 881.306255     | 441.156766       |
| 13 | <b>1453.572241</b> | 727.289759      | 1436.545692    | 718.776484       | 1435.561676        | 718.284476       | D    | <b>768.276335</b>  | 384.641806        | 751.249786         | 376.128531       | 750.265770     | 375.636523       |
| 14 | 1613.602890        | 807.305083      | 1596.576341    | 798.791809       | 1595.592325        | 798.299801       | C    | <b>653.249392</b>  | 327.128334        | 636.222843         | 318.615060       | 635.238827     | 318.123052       |
| 15 | <b>1684.640004</b> | 842.823640      | 1667.613455    | 834.310366       | 1666.629439        | 833.818358       | A    | <b>493.218743</b>  | 247.113010        | 476.192194         | 238.599735       | 475.208178     | 238.107727       |
| 16 | 1771.672032        | 886.339654      | 1754.645483    | 877.826380       | 1753.661467        | 877.334372       | S    | <b>422.181629</b>  | 211.594453        | 405.155080         | 203.081178       | 404.171064     | 202.589170       |
| 17 | <b>1931.702681</b> | 966.354979      | 1914.676132    | 957.841704       | 1913.692116        | 957.349696       | C    | 335.149601         | 168.078439        | 318.123052         | 159.565164       |                |                  |
| 18 |                    |                 |                |                  |                    |                  | R    | 175.118952         | 88.063114         | 158.092403         | 79.549840        |                |                  |



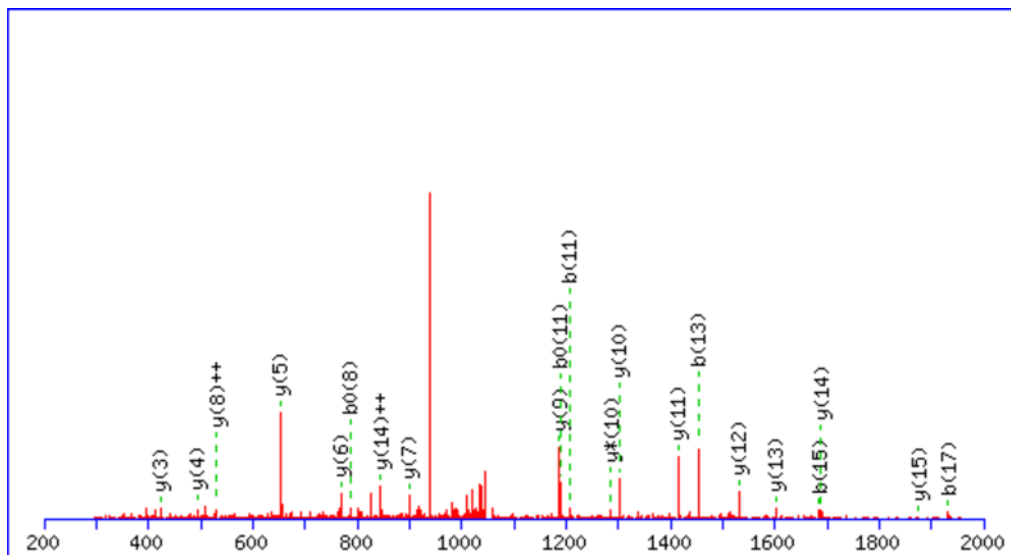

## Peptide View

MS/MS Fragmentation of **GGVVLKEDALPGQK**

Found in **IPI00019906**, Tax\_Id=9606 Gene\_Symbol=BSG Isoform 2 of Basigin

**Experiment:** 34 - OPB-1 **Fraction:** OPB-1

Match to Query 8190: 1409.787848 from(705.901200,2+)

Title: OECHL100310\_17.9813.9813.2.dta

Data file \\BOROMIR\Masse\Data LTQ-Orbitrap\Chrystelle Lacroix\Etude clinique sJPU\OECHL100310\_17.raw

**Monoisotopic mass of neutral peptide Mr(calc):** 1409.787827 **Fixed modifications:** Carbamidomethyl (C) (apply to specified residues or termini only) **Ions Score:** 71

**Expect:** 3.3e-006 **Matches :** 31/122 fragment ions using 56 most intense peaks ([help](#))

| # | b                 | b <sup>++</sup> | b*         | b <sup>*++</sup> | b <sup>0</sup> | b <sup>0++</sup> | Seq.     | y                  | y <sup>++</sup>   | y*                 | y <sup>*++</sup> | y <sup>0</sup> | y <sup>0++</sup> | #         |
|---|-------------------|-----------------|------------|------------------|----------------|------------------|----------|--------------------|-------------------|--------------------|------------------|----------------|------------------|-----------|
| 1 | 58.028740         | 29.518008       |            |                  |                |                  | <b>G</b> |                    |                   |                    |                  |                |                  | <b>14</b> |
| 2 | 115.050204        | 58.028740       |            |                  |                |                  | <b>G</b> | 1353.773643        | 677.390460        | 1336.747094        | 668.877185       | 1335.763078    | 668.385177       | <b>13</b> |
| 3 | <b>214.118618</b> | 107.562947      |            |                  |                |                  | <b>V</b> | 1296.752179        | 648.879728        | 1279.725630        | 640.366453       | 1278.741614    | 639.874445       | <b>12</b> |
| 4 | <b>313.187032</b> | 157.097154      |            |                  |                |                  | <b>V</b> | <b>1197.683765</b> | <b>599.345521</b> | 1180.657216        | 590.832246       | 1179.673200    | 590.340238       | <b>11</b> |
| 5 | <b>426.271096</b> | 213.639186      |            |                  |                |                  | <b>L</b> | <b>1098.615351</b> | <b>549.811314</b> | <b>1081.588802</b> | 541.298039       | 1080.604786    | 540.806031       | <b>10</b> |
| 6 | <b>554.366059</b> | 277.686668      | 537.339510 | 269.173393       |                |                  | <b>K</b> | <b>985.531287</b>  | <b>493.269282</b> | 968.504738         | 484.756007       | 967.520722     | 484.263999       | <b>9</b>  |

|    |                    |            |             |                   |                    |                   |          |                   |                   |            |            |                   |            |          |
|----|--------------------|------------|-------------|-------------------|--------------------|-------------------|----------|-------------------|-------------------|------------|------------|-------------------|------------|----------|
| 7  | <b>683.408652</b>  | 342.207964 | 666.382103  | 333.694690        | 665.398087         | 333.202682        | <b>E</b> | <b>857.436324</b> | <b>429.221800</b> | 840.409775 | 420.708526 | <b>839.425759</b> | 420.216518 | <b>8</b> |
| 8  | <b>798.435595</b>  | 399.721436 | 781.409046  | 391.208161        | 780.425030         | 390.716153        | <b>D</b> | <b>728.393731</b> | 364.700504        | 711.367182 | 356.187229 | 710.383166        | 355.695221 | <b>7</b> |
| 9  | <b>869.472709</b>  | 435.239993 | 852.446160  | <b>426.726718</b> | 851.462144         | <b>426.234710</b> | <b>A</b> | <b>613.366788</b> | 307.187032        | 596.340239 | 298.673758 |                   |            | <b>6</b> |
| 10 | <b>982.556773</b>  | 491.782025 | 965.530224  | 483.268750        | <b>964.546208</b>  | 482.776742        | <b>L</b> | <b>542.329674</b> | 271.668475        | 525.303125 | 263.155201 |                   |            | <b>5</b> |
| 11 | <b>1079.609537</b> | 540.308407 | 1062.582988 | 531.795132        | 1061.598972        | 531.303124        | <b>P</b> | <b>429.245610</b> | 215.126443        | 412.219061 | 206.613169 |                   |            | <b>4</b> |
| 12 | <b>1136.631001</b> | 568.819139 | 1119.604452 | 560.305864        | <b>1118.620436</b> | 559.813856        | <b>G</b> | <b>332.192846</b> | 166.600061        | 315.166297 | 158.086787 |                   |            | <b>3</b> |
| 13 | <b>1264.689579</b> | 632.848428 | 1247.663030 | 624.335153        | <b>1246.679014</b> | 623.843145        | <b>Q</b> | 275.171382        | 138.089329        | 258.144833 | 129.576055 |                   |            | <b>2</b> |
| 14 |                    |            |             |                   |                    |                   | <b>K</b> | 147.112804        | 74.060040         | 130.086255 | 65.546765  |                   |            | <b>1</b> |

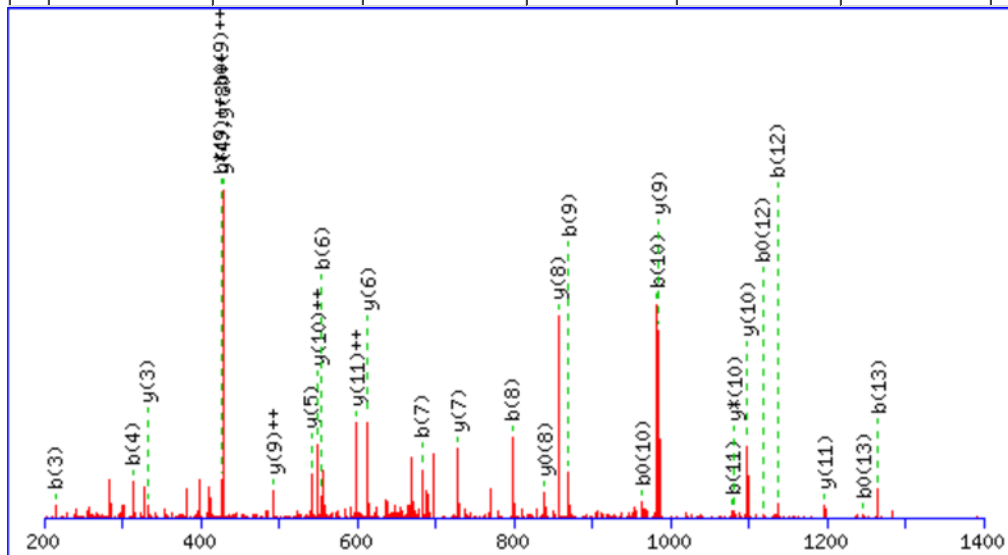

## Peptide View

MS/MS Fragmentation of **VLSNTEDLPLVTK**

Found in **IP100218851**, Tax\_Id=9606 Gene\_Symbol=LYNX1 Ly-6 neurotoxin-like protein 1 isoform a

**Experiment:** 34 - OPB-1 **Fraction:** OPB-1

Match to Query 8366: 1427.789448 from(714.902000,2+)

Title: OECHL100310\_17.14286.14286.2.dta

Data file \\BOROMIR\Masse\Data LTQ-Orbitrap\Chrystelle Lacroix\Etude clinique sJPU\OECHL100310\_17.raw

**Monoisotopic mass of neutral peptide Mr(calc):** 1427.787155 **Fixed modifications:** Carbamidomethyl (C) (apply to specified residues or termini only) **Ions Score:** 79

**Expect:** 8.2e-007**Matches :** 22/132 fragment ions using 36 most intense peaks ([help](#))

| #  | b                  | b <sup>++</sup> | b*                | b <sup>*++</sup> | b <sup>0</sup>     | b <sup>0++</sup> | Seq. | y                  | y <sup>++</sup> | y*                 | y <sup>*++</sup>  | y <sup>0</sup> | y <sup>0++</sup>  | #  |
|----|--------------------|-----------------|-------------------|------------------|--------------------|------------------|------|--------------------|-----------------|--------------------|-------------------|----------------|-------------------|----|
| 1  | 100.075690         | 50.541483       |                   |                  |                    |                  | V    |                    |                 |                    |                   |                |                   | 13 |
| 2  | <b>213.159754</b>  | 107.083515      |                   |                  |                    |                  | L    | <b>1329.726023</b> | 665.366650      | 1312.699474        | 656.853375        | 1311.715458    | 656.361367        | 12 |
| 3  | <b>300.191782</b>  | 150.599529      |                   |                  | 282.181217         | 141.594247       | S    | <b>1216.641959</b> | 608.824618      | <b>1199.615410</b> | <b>600.311343</b> | 1198.631394    | <b>599.819335</b> | 11 |
| 4  | 414.234709         | 207.620993      | 397.208160        | 199.107718       | 396.224144         | 198.615710       | N    | <b>1129.609931</b> | 565.308604      | 1112.583382        | 556.795329        | 1111.599366    | 556.303321        | 10 |
| 5  | 515.282388         | 258.144832      | 498.255839        | 249.631558       | <b>497.271823</b>  | 249.139550       | T    | <b>1015.567004</b> | 508.287140      | 998.540455         | 499.773866        | 997.556439     | 499.281858        | 9  |
| 6  | 644.324981         | 322.666129      | 627.298432        | 314.152854       | 626.314416         | 313.660846       | E    | <b>914.519325</b>  | 457.763301      | 897.492776         | 449.250026        | 896.508760     | 448.758018        | 8  |
| 7  | 759.351924         | 380.179600      | 742.325375        | 371.666326       | 741.341359         | 371.174318       | D    | <b>785.476732</b>  | 393.242004      | 768.450183         | 384.728730        | 767.466167     | 384.236722        | 7  |
| 8  | <b>872.435988</b>  | 436.721632      | <b>855.409439</b> | 428.208358       | 854.425423         | 427.716350       | L    | <b>670.449789</b>  | 335.728533      | 653.423240         | 327.215258        | 652.439224     | 326.723250        | 6  |
| 9  | <b>969.488752</b>  | 485.248014      | 952.462203        | 476.734740       | 951.478187         | 476.242732       | P    | <b>557.365725</b>  | 279.186501      | 540.339176         | 270.673226        | 539.355160     | 270.181218        | 5  |
| 10 | 1082.572816        | 541.790046      | 1065.546267       | 533.276772       | <b>1064.562251</b> | 532.784764       | L    | 460.312961         | 230.660119      | 443.286412         | 222.146844        | 442.302396     | 221.654836        | 4  |
| 11 | <b>1181.641230</b> | 591.324253      | 1164.614681       | 582.810979       | 1163.630665        | 582.318971       | V    | <b>347.228897</b>  | 174.118087      | 330.202348         | 165.604812        | 329.218332     | 165.112804        | 3  |
| 12 | <b>1282.688909</b> | 641.848093      | 1265.662360       | 633.334818       | 1264.678344        | 632.842810       | T    | <b>248.160483</b>  | 124.583879      | 231.133934         | 116.070605        | 230.149918     | 115.578597        | 2  |
| 13 |                    |                 |                   |                  |                    |                  | K    | 147.112804         | 74.060040       | 130.086255         | 65.546765         |                |                   | 1  |

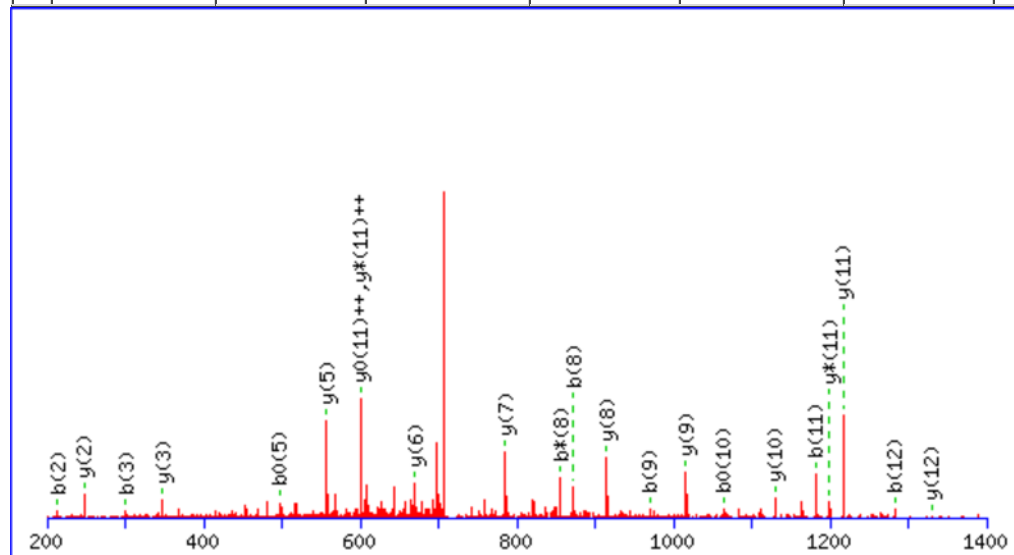

## Peptide View

MS/MS Fragmentation of **ALDFAVGEYNK**Found in **IPI00032293**, Tax\_Id=9606 Gene\_Symbol=CST3 Cystatin-C**Experiment:** 34 - OPB-1 **Fraction:** OPB-1

Match to Query 6013: 1225.598048 from(613.806300,2+)

Title: OECHL100310\_17.14766.14766.2.dta

Data file \\BOROMIR\Masse\Data LTQ-Orbitrap\Chrystelle Lacroix\Etude clinique sJPU\OECHL100310\_17.raw

**Monoisotopic mass of neutral peptide Mr(calc):** 1225.597885 **Fixed modifications:** Carbamidomethyl (C) (apply to specified residues or termini only) **Ions Score:** 56**Expect:** 0.00023 **Matches :** 15/92 fragment ions using 22 most intense peaks ([help](#))

| #  | b                  | b <sup>++</sup> | b*          | b <sup>*++</sup> | b <sup>0</sup> | b <sup>0++</sup>  | Seq. | y                  | y <sup>++</sup> | y*                | y <sup>*++</sup> | y <sup>0</sup> | y <sup>0++</sup> | #  |
|----|--------------------|-----------------|-------------|------------------|----------------|-------------------|------|--------------------|-----------------|-------------------|------------------|----------------|------------------|----|
| 1  | 72.044390          | 36.525833       |             |                  |                |                   | A    |                    |                 |                   |                  |                |                  | 11 |
| 2  | 185.128454         | 93.067865       |             |                  |                |                   | L    | 1155.568066        | 578.287671      | 1138.541517       | 569.774397       | 1137.557501    | 569.282389       | 10 |
| 3  | <b>300.155397</b>  | 150.581336      |             |                  | 282.144832     | 141.576054        | D    | <b>1042.484002</b> | 521.745639      | 1025.457453       | 513.232365       | 1024.473437    | 512.740357       | 9  |
| 4  | <b>447.223811</b>  | 224.115544      |             |                  | 429.213246     | 215.110261        | F    | <b>927.457059</b>  | 464.232168      | 910.430510        | 455.718893       | 909.446494     | 455.226885       | 8  |
| 5  | <b>518.260925</b>  | 259.634101      |             |                  | 500.250360     | 250.628818        | A    | <b>780.388645</b>  | 390.697961      | 763.362096        | 382.184686       | 762.378080     | 381.692678       | 7  |
| 6  | 617.329339         | 309.168308      |             |                  | 599.318774     | <b>300.163025</b> | V    | <b>709.351531</b>  | 355.179404      | 692.324982        | 346.666129       | 691.340966     | 346.174121       | 6  |
| 7  | <b>674.350803</b>  | 337.679040      |             |                  | 656.340238     | 328.673757        | G    | 610.283117         | 305.645197      | 593.256568        | 297.131922       | 592.272552     | 296.639914       | 5  |
| 8  | <b>803.393396</b>  | 402.200336      |             |                  | 785.382831     | 393.195054        | E    | <b>553.261653</b>  | 277.134465      | 536.235104        | 268.621190       | 535.251088     | 268.129182       | 4  |
| 9  | 966.456725         | 483.732001      |             |                  | 948.446160     | 474.726718        | Y    | <b>424.219060</b>  | 212.613168      | 407.192511        | 204.099893       |                |                  | 3  |
| 10 | <b>1080.499652</b> | 540.753464      | 1063.473103 | 532.240190       | 1062.489087    | 531.748181        | N    | <b>261.155731</b>  | 131.081503      | <b>244.129182</b> | 122.568229       |                |                  | 2  |
| 11 |                    |                 |             |                  |                |                   | K    | 147.112804         | 74.060040       | 130.086255        | 65.546765        |                |                  | 1  |

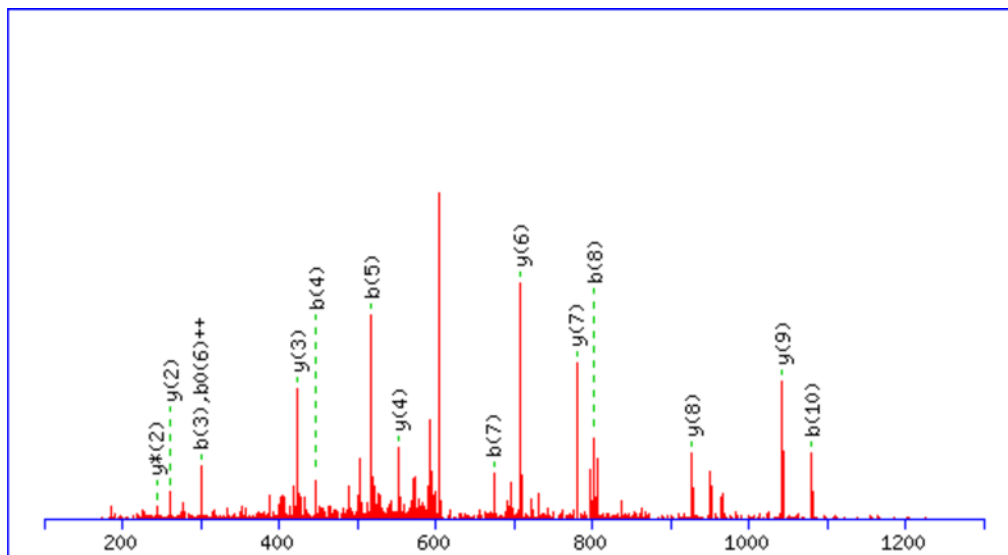

## Peptide View

MS/MS Fragmentation of **SFCDLTDEWR**

Found in **IPI00010193**, Tax\_Id=9606 Gene\_Symbol=IFNAR2 Isoform 1 of Interferon-alpha/beta receptor beta chain

**Experiment:** 34 - OPB-1 **Fraction:** OPB-1

Match to Query 7493: 1327.551248 from(664.782900,2+)

Title: OECHL100310\_17.16988.16988.2.dta

Data file \\BOROMIR\Masse\Data LTQ-Orbitrap\Chrystelle Lacroix\Etude clinique sJPU\OECHL100310\_17.raw

**Monoisotopic mass of neutral peptide Mr(calc):** 1327.550308 **Fixed modifications:** Carbamidomethyl (C) (apply to specified residues or termini only) **Ions Score:** 52

**Expect:** 0.00017 **Matches :** 11/86 fragment ions using 12 most intense peaks ([help](#))

| # | b          | b <sup>++</sup> | b <sup>0</sup>    | b <sup>0++</sup> | Seq. | y                  | y <sup>++</sup>   | y*          | y <sup>*++</sup> | y <sup>0</sup> | y <sup>0++</sup> | #  |
|---|------------|-----------------|-------------------|------------------|------|--------------------|-------------------|-------------|------------------|----------------|------------------|----|
| 1 | 88.039304  | 44.523290       | 70.028739         | 35.518008        | S    |                    |                   |             |                  |                |                  | 10 |
| 2 | 235.107718 | 118.057497      | 217.097153        | 109.052214       | F    | 1241.525550        | 621.266413        | 1224.499001 | 612.753138       | 1223.514985    | 612.261130       | 9  |
| 3 | 395.138367 | 198.072821      | 377.127802        | 189.067539       | C    | <b>1094.457136</b> | <b>547.732206</b> | 1077.430587 | 539.218932       | 1076.446571    | 538.726924       | 8  |
| 4 | 510.165310 | 255.586293      | 492.154745        | 246.581010       | D    | <b>934.426487</b>  | 467.716882        | 917.399938  | 459.203607       | 916.415922     | 458.711599       | 7  |
| 5 | 623.249374 | 312.128325      | <b>605.238809</b> | 303.123043       | L    | <b>819.399544</b>  | 410.203410        | 802.372995  | 401.690135       | 801.388979     | 401.198127       | 6  |
| 6 | 724.297053 | 362.652165      | <b>706.286488</b> | 353.646882       | T    | <b>706.315480</b>  | 353.661378        | 689.288931  | 345.148103       | 688.304915     | 344.656095       | 5  |

|    |             |            |             |            |   |            |            |            |            |            |            |   |
|----|-------------|------------|-------------|------------|---|------------|------------|------------|------------|------------|------------|---|
| 7  | 839.323996  | 420.165636 | 821.313431  | 411.160353 | D | 605.267801 | 303.137539 | 588.241252 | 294.624264 | 587.257236 | 294.132256 | 4 |
| 8  | 968.366589  | 484.686933 | 950.356024  | 475.681650 | E | 490.240858 | 245.624067 | 473.214309 | 237.110792 | 472.230293 | 236.618784 | 3 |
| 9  | 1154.445902 | 577.726589 | 1136.435337 | 568.721306 | W | 361.198265 | 181.102770 | 344.171716 | 172.589496 |            |            | 2 |
| 10 |             |            |             |            | R | 175.118952 | 88.063114  | 158.092403 | 79.549839  |            |            | 1 |

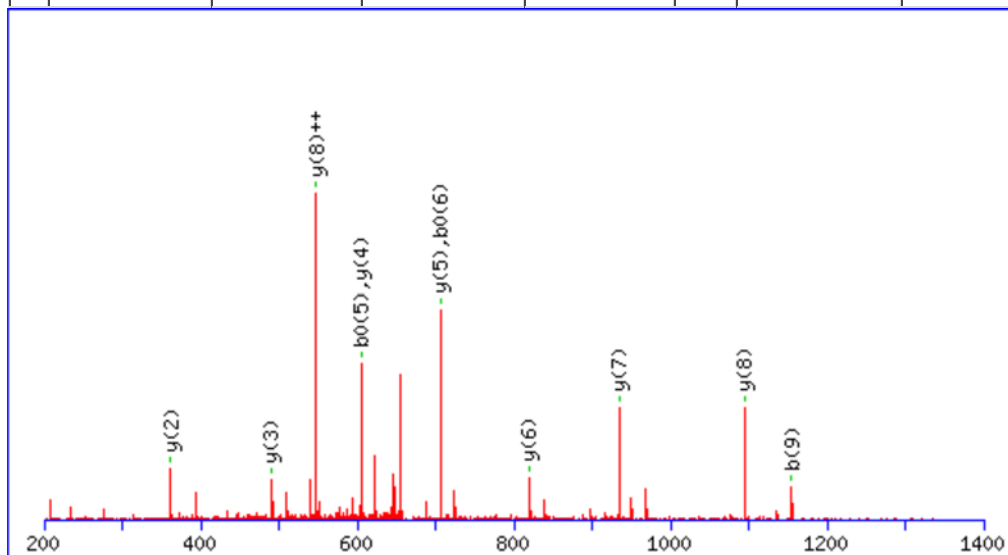

## Peptide View

MS/MS Fragmentation of **DGAPCIEGGTVYR**

Found in **IPI00020977**, Tax\_Id=9606 Gene\_Symbol=CTGF Isoform 1 of Connective tissue growth factor

**Experiment:** 34 - OPB-1 **Fraction:** OPB-1

Match to Query 8210: 1411.655848 from(706.835200,2+)

Title: OECHL100310\_17.15803.15803.2.dta

Data file \\BOROMIR\Masse\Data LTQ-Orbitrap\Chrystelle Lacroix\Etude clinique sJPU\OECHL100310\_17.raw

**Monoisotopic mass of neutral peptide Mr(calc):** 1411.655457 **Fixed modifications:** Carbamidomethyl (C) (apply to specified residues or termini only) **Ions Score:** 52

**Expect:** 0.00055 **Matches :** 21/114 fragment ions using 35 most intense peaks ([help](#))

| # | b          | b <sup>++</sup> | b <sup>0</sup> | b <sup>0++</sup> | Seq. | y           | y <sup>++</sup> | y <sup>*</sup> | y <sup>*++</sup> | y <sup>0</sup> | y <sup>0++</sup> | #  |
|---|------------|-----------------|----------------|------------------|------|-------------|-----------------|----------------|------------------|----------------|------------------|----|
| 1 | 116.034219 | 58.520748       | 98.023654      | 49.515465        | D    |             |                 |                |                  |                |                  | 13 |
| 2 | 173.055683 | 87.031479       | 155.045118     | 78.026197        | G    | 1297.635771 | 649.321524      | 1280.609222    | 640.808249       | 1279.625206    | 640.316241       | 12 |

|    |                    |                   |                    |            |   |                    |                   |             |            |             |            |           |
|----|--------------------|-------------------|--------------------|------------|---|--------------------|-------------------|-------------|------------|-------------|------------|-----------|
| 3  | <b>244.092797</b>  | 122.550036        | 226.082232         | 113.544754 | A | 1240.614307        | 620.810792        | 1223.587758 | 612.297517 | 1222.603742 | 611.805509 | <b>11</b> |
| 4  | 341.145561         | 171.076418        | 323.134996         | 162.071136 | P | <b>1169.577193</b> | <b>585.292235</b> | 1152.550644 | 576.778960 | 1151.566628 | 576.286952 | <b>10</b> |
| 5  | 501.176210         | 251.091743        | 483.165645         | 242.086461 | C | <b>1072.524429</b> | 536.765853        | 1055.497880 | 528.252578 | 1054.513864 | 527.760570 | <b>9</b>  |
| 6  | <b>614.260274</b>  | 307.633775        | 596.249709         | 298.628493 | I | <b>912.493780</b>  | 456.750528        | 895.467231  | 448.237254 | 894.483215  | 447.745246 | <b>8</b>  |
| 7  | <b>761.328688</b>  | 381.167982        | <b>743.318123</b>  | 372.162700 | F | <b>799.409716</b>  | 400.208496        | 782.383167  | 391.695222 | 781.399151  | 391.203214 | <b>7</b>  |
| 8  | <b>818.350152</b>  | 409.678714        | <b>800.339587</b>  | 400.673432 | G | <b>652.341302</b>  | 326.674289        | 635.314753  | 318.161015 | 634.330737  | 317.669007 | <b>6</b>  |
| 9  | 875.371616         | 438.189446        | 857.361051         | 429.184164 | G | <b>595.319838</b>  | 298.163557        | 578.293289  | 289.650283 | 577.309273  | 289.158275 | <b>5</b>  |
| 10 | <b>976.419295</b>  | <b>488.713286</b> | 958.408730         | 479.708003 | T | 538.298374         | 269.652825        | 521.271825  | 261.139551 | 520.287809  | 260.647543 | <b>4</b>  |
| 11 | <b>1075.487709</b> | 538.247493        | <b>1057.477144</b> | 529.242210 | V | <b>437.250695</b>  | 219.128986        | 420.224146  | 210.615711 |             |            | <b>3</b>  |
| 12 | <b>1238.551038</b> | 619.779157        | <b>1220.540473</b> | 610.773875 | Y | <b>338.182281</b>  | 169.594778        | 321.155732  | 161.081504 |             |            | <b>2</b>  |
| 13 |                    |                   |                    |            | R | 175.118952         | 88.063114         | 158.092403  | 79.549839  |             |            | <b>1</b>  |

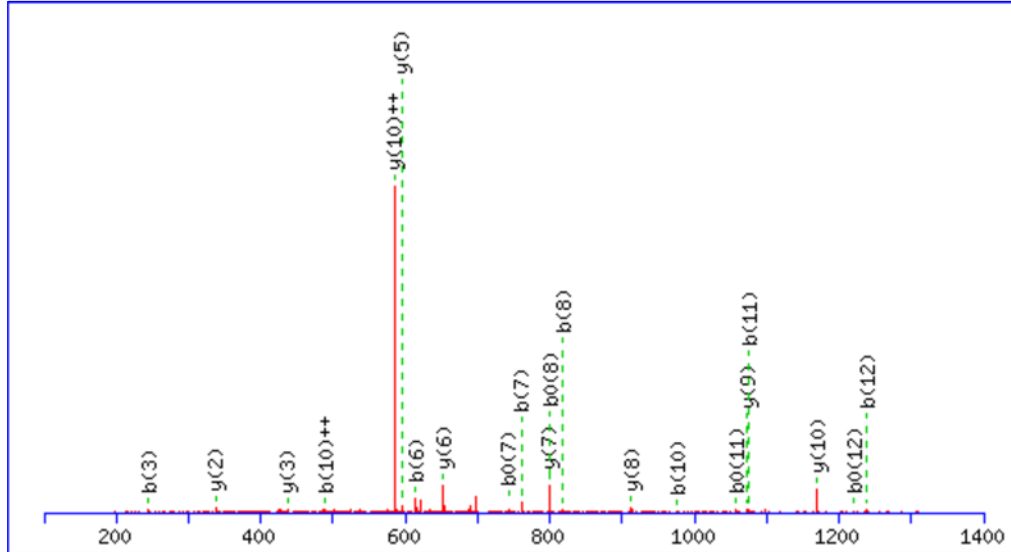

## Peptide View

MS/MS Fragmentation of **LTEPADTITDAVK**

Found in **IP100304808**, Tax\_Id=9606 Gene\_Symbol=KLK1 Isoform 1 of Kallikrein-1

Experiment: 34 - OPB-1 Fraction: OPB-1

Match to Query 7879: 1372.707648 from(687.361100,2+)

Title: OECHL100310\_17.12658.12658.2.dta

Data file \\BOROMIR\Masse\Data LTQ-Orbitrap\Chrystelle Lacroix\Etude clinique sJPU\OECHL100310\_17.raw

**Monoisotopic mass of neutral peptide Mr(calc):** 1372.708572**Fixed modifications:** Carbamidomethyl (C) (apply to specified residues or termini only)**Ions Score:** 67**Expect:** 3.1e-005**Matches :** 23/112 fragment ions using 36 most intense peaks ([help](#))

| #  | b                  | b <sup>++</sup> | b <sup>0</sup>     | b <sup>0++</sup> | Seq. | y                  | y <sup>++</sup>   | y*                | y <sup>*++</sup> | y <sup>0</sup> | y <sup>0++</sup> | #  |
|----|--------------------|-----------------|--------------------|------------------|------|--------------------|-------------------|-------------------|------------------|----------------|------------------|----|
| 1  | 114.091340         | 57.549308       |                    |                  | L    |                    |                   |                   |                  |                |                  | 13 |
| 2  | <b>215.139019</b>  | 108.073147      | <b>197.128454</b>  | 99.067865        | T    | 1260.631790        | 630.819533        | 1243.605241       | 622.306259       | 1242.621225    | 621.814251       | 12 |
| 3  | <b>344.181612</b>  | 172.594444      | <b>326.171047</b>  | 163.589162       | E    | <b>1159.584111</b> | <b>580.295694</b> | 1142.557562       | 571.782419       | 1141.573546    | 571.290411       | 11 |
| 4  | 441.234376         | 221.120826      | 423.223811         | 212.115544       | P    | <b>1030.541518</b> | <b>515.774397</b> | 1013.514969       | 507.261123       | 1012.530953    | 506.769115       | 10 |
| 5  | 512.271490         | 256.639383      | 494.260925         | 247.634101       | A    | <b>933.488754</b>  | <b>467.248015</b> | 916.462205        | 458.734741       | 915.478189     | 458.242733       | 9  |
| 6  | 627.298433         | 314.152855      | 609.287868         | 305.147572       | D    | <b>862.451640</b>  | 431.729458        | 845.425091        | 423.216184       | 844.441075     | 422.724176       | 8  |
| 7  | 728.346112         | 364.676694      | <b>710.335547</b>  | 355.671412       | T    | <b>747.424697</b>  | 374.215987        | 730.398148        | 365.702712       | 729.414132     | 365.210704       | 7  |
| 8  | 841.430176         | 421.218726      | <b>823.419611</b>  | 412.213444       | I    | <b>646.377018</b>  | 323.692147        | 629.350469        | 315.178873       | 628.366453     | 314.686865       | 6  |
| 9  | 942.477855         | 471.742566      | 924.467290         | 462.737283       | T    | <b>533.292954</b>  | 267.150115        | <b>516.266405</b> | 258.636841       | 515.282389     | 258.144833       | 5  |
| 10 | <b>1057.504798</b> | 529.256037      | 1039.494233        | 520.250755       | D    | <b>432.245275</b>  | 216.626276        | 415.218726        | 208.113001       | 414.234710     | 207.620993       | 4  |
| 11 | <b>1128.541912</b> | 564.774594      | 1110.531347        | 555.769312       | A    | <b>317.218332</b>  | 159.112804        | 300.191783        | 150.599530       |                |                  | 3  |
| 12 | <b>1227.610326</b> | 614.308801      | <b>1209.599761</b> | 605.303519       | V    | 246.181218         | 123.594247        | 229.154669        | 115.080973       |                |                  | 2  |
| 13 |                    |                 |                    |                  | K    | 147.112804         | 74.060040         | 130.086255        | 65.546765        |                |                  | 1  |

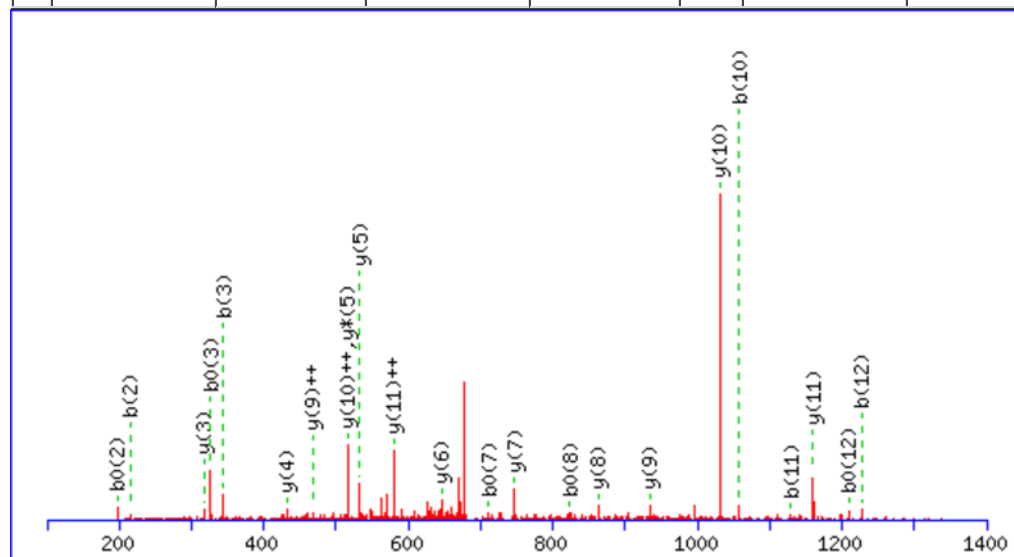



## Peptide View

MS/MS Fragmentation of **EIVLTQSPATLSLSPGER**

Found in **IP100816799**, Tax\_Id=9606 Gene\_Symbol=- Rheumatoid factor D5 light chain (Fragment)

**Experiment:** 34 - OPB-1 **Fraction:** OPB-1

Match to Query 13035: 1897.017648 from(949.516100,2+)

Title: OECHL100310\_17.16775.16775.2.dta

Data file \\BOROMIR\Masse\Data LTQ-Orbitrap\Chrystelle Lacroix\Etude clinique sJPU\OECHL100310\_17.raw

**Monoisotopic mass of neutral peptide Mr(calc):** 1897.015640 **Fixed modifications:** Carbamidomethyl (C) (apply to specified residues or termini only) **Ions Score:** 56

**Expect:** 0.00023 **Matches :** 51/192 fragment ions using 106 most intense peaks ([help](#))

| #  | b                  | b <sup>++</sup>   | b*                 | b <sup>*++</sup> | b <sup>0</sup>     | b <sup>0++</sup> | Seq.     | y                  | y <sup>++</sup>   | y*                 | y <sup>*++</sup>  | y <sup>0</sup>     | y <sup>0++</sup>  | #         |
|----|--------------------|-------------------|--------------------|------------------|--------------------|------------------|----------|--------------------|-------------------|--------------------|-------------------|--------------------|-------------------|-----------|
| 1  | 130.049869         | 65.528572         |                    |                  | 112.039304         | 56.523290        | <b>E</b> |                    |                   |                    |                   |                    |                   | <b>18</b> |
| 2  | 243.133933         | 122.070605        |                    |                  | 225.123368         | 113.065322       | <b>I</b> | 1768.980341        | 884.993808        | 1751.953792        | 876.480534        | 1750.969776        | 875.988526        | <b>17</b> |
| 3  | <b>342.202347</b>  | 171.604812        |                    |                  | 324.191782         | 162.599529       | <b>V</b> | 1655.896277        | <b>828.451776</b> | 1638.869728        | <b>819.938502</b> | 1637.885712        | 819.446494        | <b>16</b> |
| 4  | <b>455.286411</b>  | 228.146844        |                    |                  | <b>437.275846</b>  | 219.141561       | <b>L</b> | <b>1556.827863</b> | <b>778.917569</b> | <b>1539.801314</b> | <b>770.404295</b> | <b>1538.817298</b> | <b>769.912287</b> | <b>15</b> |
| 5  | <b>556.334090</b>  | 278.670683        |                    |                  | <b>538.323525</b>  | 269.665401       | <b>T</b> | <b>1443.743799</b> | 722.375537        | 1426.717250        | 713.862263        | 1425.733234        | 713.370255        | <b>14</b> |
| 6  | 684.392668         | <b>342.699972</b> | <b>667.366119</b>  | 334.186698       | <b>666.382103</b>  | 333.694690       | <b>Q</b> | <b>1342.696120</b> | <b>671.851698</b> | 1325.669571        | 663.338423        | 1324.685555        | 662.846415        | <b>13</b> |
| 7  | <b>771.424696</b>  | 386.215986        | <b>754.398147</b>  | 377.702712       | <b>753.414131</b>  | 377.210704       | <b>S</b> | <b>1214.637542</b> | 607.822409        | <b>1197.610993</b> | 599.309134        | 1196.626977        | 598.817126        | <b>12</b> |
| 8  | 868.477460         | 434.742368        | 851.450911         | 426.229094       | 850.466895         | 425.737086       | <b>P</b> | <b>1127.605514</b> | 564.306395        | 1110.578965        | 555.793120        | 1109.594949        | 555.301112        | <b>11</b> |
| 9  | 939.514574         | 470.260925        | <b>922.488025</b>  | 461.747651       | 921.504009         | 461.255643       | <b>A</b> | <b>1030.552750</b> | 515.780013        | 1013.526201        | 507.266738        | 1012.542185        | 506.774730        | <b>10</b> |
| 10 | <b>1040.562253</b> | 520.784765        | 1023.535704        | 512.271490       | <b>1022.551688</b> | 511.779482       | <b>T</b> | <b>959.515636</b>  | 480.261456        | 942.489087         | 471.748181        | <b>941.505071</b>  | 471.256173        | <b>9</b>  |
| 11 | <b>1153.646317</b> | 577.326797        | 1136.619768        | 568.813522       | <b>1135.635752</b> | 568.321514       | <b>L</b> | <b>858.467957</b>  | <b>429.737616</b> | <b>841.441408</b>  | 421.224342        | 840.457392         | 420.732334        | <b>8</b>  |
| 12 | <b>1240.678345</b> | 620.842811        | <b>1223.651796</b> | 612.329536       | 1222.667780        | 611.837528       | <b>S</b> | <b>745.383893</b>  | 373.195585        | 728.357344         | 364.682310        | 727.373328         | 364.190302        | <b>7</b>  |
| 13 | <b>1353.762409</b> | 677.384842        | <b>1336.735860</b> | 668.871568       | <b>1335.751844</b> | 668.379560       | <b>L</b> | <b>658.351865</b>  | 329.679570        | 641.325316         | 321.166296        | 640.341300         | 320.674288        | <b>6</b>  |
| 14 | <b>1440.794437</b> | 720.900857        | <b>1423.767888</b> | 712.387582       | <b>1422.783872</b> | 711.895574       | <b>S</b> | <b>545.267801</b>  | 273.137539        | 528.241252         | 264.624264        | <b>527.257236</b>  | 264.132256        | <b>5</b>  |
| 15 | 1537.847201        | 769.427239        | 1520.820652        | 760.913964       | 1519.836636        | 760.421956       | <b>P</b> | <b>458.235773</b>  | 229.621524        | <b>441.209224</b>  | 221.108250        | 440.225208         | 220.616242        | <b>4</b>  |
| 16 | 1594.868665        | 797.937971        | 1577.842116        | 789.424696       | 1576.858100        | 788.932688       | <b>G</b> | 361.183009         | 181.095142        | 344.156460         | 172.581868        | 343.172444         | 172.089860        | <b>3</b>  |
| 17 | <b>1723.911258</b> | 862.459267        | 1706.884709        | 853.945992       | 1705.900693        | 853.453984       | <b>E</b> | 304.161545         | 152.584410        | 287.134996         | 144.071136        | 286.150980         | 143.579128        | <b>2</b>  |
| 18 |                    |                   |                    |                  |                    |                  | <b>R</b> | 175.118952         | 88.063114         | 158.092403         | 79.549839         |                    |                   | <b>1</b>  |

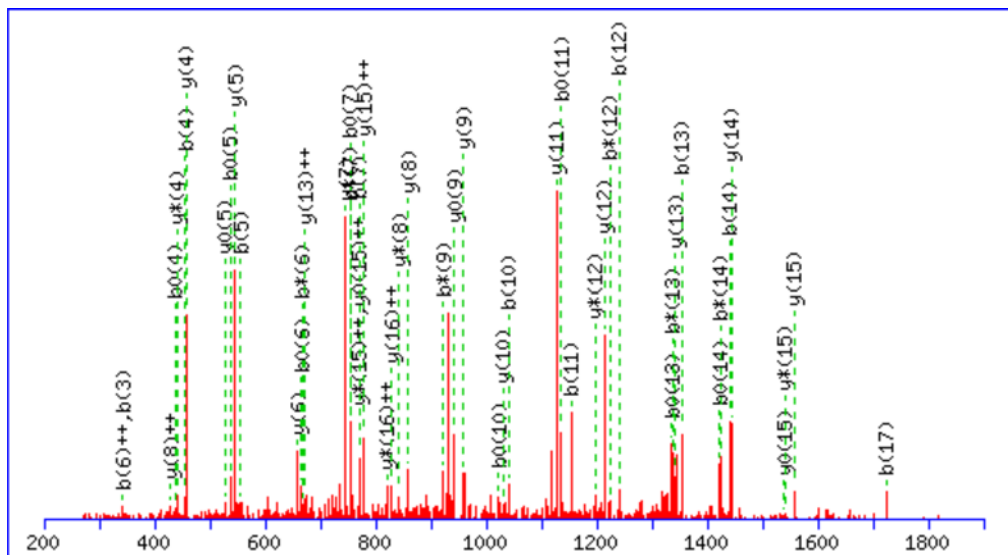

## Peptide View

MS/MS Fragmentation of **CPLQDFLR**

Found in **IPI00003807**, Tax\_Id=9606 Gene\_Symbol=ACP2 Lysosomal acid phosphatase

**Experiment:** 34 - OPB-1 **Fraction:** OPB-1

Match to Query 3576: 1047.517248 from(524.765900,2+)

Title: OECHL100310\_17.17068.17068.2.dta

Data file \\BOROMIR\Masse\Data LTQ-Orbitrap\Chrystelle Lacroix\Etude clinique sJPU\OECHL100310\_17.raw

**Monoisotopic mass of neutral peptide Mr(calc):** 1047.517151 **Fixed modifications:** Carbamidomethyl (C) (apply to specified residues or termini only) **Ions Score:** 55

**Expect:** 0.00026 **Matches :** 11/64 fragment ions using 18 most intense peaks ([help](#))

| # | b                 | b <sup>++</sup> | b*         | b <sup>*++</sup> | b <sup>0</sup> | b <sup>0++</sup> | Seq. | y                 | y <sup>++</sup> | y*         | y <sup>*++</sup> | y <sup>0</sup> | y <sup>0++</sup>  | # |
|---|-------------------|-----------------|------------|------------------|----------------|------------------|------|-------------------|-----------------|------------|------------------|----------------|-------------------|---|
| 1 | 161.037925        | 81.022600       |            |                  |                |                  | C    |                   |                 |            |                  |                |                   | 8 |
| 2 | <b>258.090689</b> | 129.548982      |            |                  |                |                  | P    | <b>888.493779</b> | 444.750528      | 871.467230 | 436.237253       | 870.483214     | <b>435.745245</b> | 7 |
| 3 | <b>371.174753</b> | 186.091015      |            |                  |                |                  | L    | <b>791.441015</b> | 396.224146      | 774.414466 | 387.710871       | 773.430450     | 387.218863        | 6 |
| 4 | 499.233331        | 250.120304      | 482.206782 | 241.607029       |                |                  | Q    | <b>678.356951</b> | 339.682114      | 661.330402 | 331.168839       | 660.346386     | 330.676831        | 5 |
| 5 | 614.260274        | 307.633775      | 597.233725 | 299.120501       | 596.249709     | 298.628493       | D    | <b>550.298373</b> | 275.652825      | 533.271824 | 267.139550       | 532.287808     | 266.647542        | 4 |
| 6 | 761.328688        | 381.167982      | 744.302139 | 372.654708       | 743.318123     | 372.162700       | F    | <b>435.271430</b> | 218.139353      | 418.244881 | 209.626079       |                |                   | 3 |

|   |            |            |            |            |            |            |   |            |            |            |            |  |  |   |
|---|------------|------------|------------|------------|------------|------------|---|------------|------------|------------|------------|--|--|---|
| 7 | 874.412752 | 437.710014 | 857.386203 | 429.196740 | 856.402187 | 428.704732 | L | 288.203016 | 144.605146 | 271.176467 | 136.091872 |  |  | 2 |
| 8 |            |            |            |            |            |            | R | 175.118952 | 88.063114  | 158.092403 | 79.549840  |  |  | 1 |

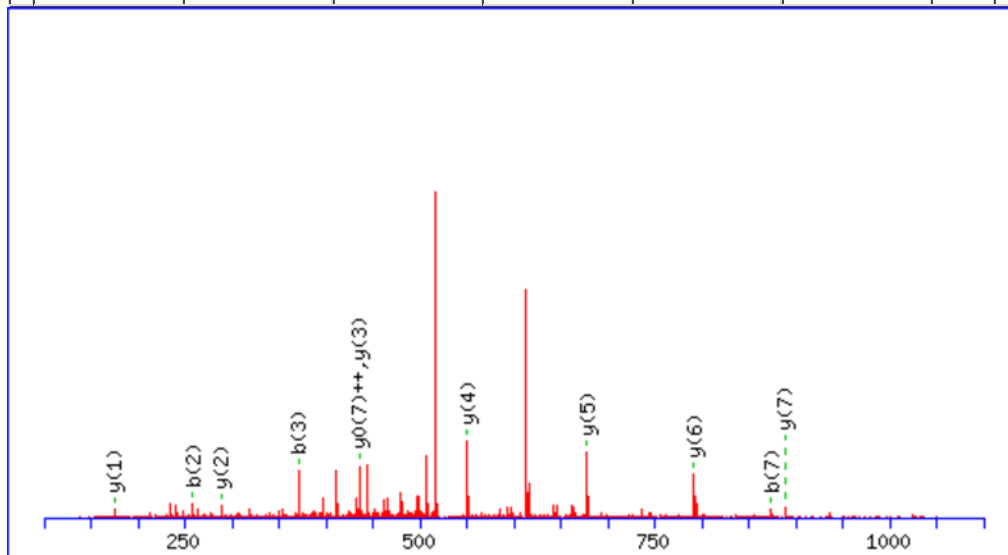

## Peptide View

MS/MS Fragmentation of **TGAVYVAEIGAK**

Found in **IPI00552937**, Tax\_Id=9606 Gene\_Symbol=NHLRC3 NHL repeat-containing protein 3

**Experiment:** 34 - OPB-1 **Fraction:** OPB-1

Match to Query 5274: 1177.635648 from(589.825100,2+)

Title: OECHL100310\_17.11474.11474.2.dta

Data file \\BOROMIR\Masse\Data LTQ-Orbitrap\Chrystelle Lacroix\Etude clinique sJPU\OECHL100310\_17.raw

**Monoisotopic mass of neutral peptide Mr(calc):** 1177.634277 **Fixed modifications:** Carbamidomethyl (C) (apply to specified residues or termini only) **Ions Score:** 55

**Expect:** 0.00021 **Matches :** 17/102 fragment ions using 40 most intense peaks ([help](#))

| # | b          | b <sup>++</sup> | b <sup>0</sup> | b <sup>0++</sup> | Seq. | y           | y <sup>++</sup> | y <sup>*</sup> | y <sup>*++</sup> | y <sup>0</sup> | y <sup>0++</sup> | #  |
|---|------------|-----------------|----------------|------------------|------|-------------|-----------------|----------------|------------------|----------------|------------------|----|
| 1 | 102.054955 | 51.531116       | 84.044390      | 42.525833        | T    |             |                 |                |                  |                |                  | 12 |
| 2 | 159.076419 | 80.041847       | 141.065854     | 71.036565        | G    | 1077.593888 | 539.300582      | 1060.567339    | 530.787308       | 1059.583323    | 530.295300       | 11 |
| 3 | 230.113533 | 115.560404      | 212.102968     | 106.555122       | A    | 1020.572424 | 510.789850      | 1003.545875    | 502.276576       | 1002.561859    | 501.784568       | 10 |
| 4 | 329.181947 | 165.094611      | 311.171382     | 156.089329       | V    | 949.535310  | 475.271293      | 932.508761     | 466.758019       | 931.524745     | 466.266011       | 9  |

|    |                    |            |                   |            |   |                   |            |                   |            |            |            |   |
|----|--------------------|------------|-------------------|------------|---|-------------------|------------|-------------------|------------|------------|------------|---|
| 5  | <b>492.245276</b>  | 246.626276 | <b>474.234711</b> | 237.620994 | Y | <b>850.466896</b> | 425.737086 | 833.440347        | 417.223812 | 832.456331 | 416.731804 | 8 |
| 6  | 591.313690         | 296.160483 | <b>573.303125</b> | 287.155201 | V | <b>687.403567</b> | 344.205422 | 670.377018        | 335.692147 | 669.393002 | 335.200139 | 7 |
| 7  | 662.350804         | 331.679040 | 644.340239        | 322.673758 | A | 588.335153        | 294.671215 | <b>571.308604</b> | 286.157940 | 570.324588 | 285.665932 | 6 |
| 8  | 791.393397         | 396.200337 | 773.382832        | 387.195054 | E | <b>517.298039</b> | 259.152658 | 500.271490        | 250.639383 | 499.287474 | 250.147375 | 5 |
| 9  | <b>904.477461</b>  | 452.742369 | 886.466896        | 443.737086 | I | <b>388.255446</b> | 194.631361 | 371.228897        | 186.118087 |            |            | 4 |
| 10 | 961.498925         | 481.253101 | 943.488360        | 472.247818 | G | <b>275.171382</b> | 138.089329 | 258.144833        | 129.576055 |            |            | 3 |
| 11 | <b>1032.536039</b> | 516.771658 | 1014.525474       | 507.766375 | A | <b>218.149918</b> | 109.578597 | 201.123369        | 101.065322 |            |            | 2 |
| 12 |                    |            |                   |            | K | 147.112804        | 74.060040  | 130.086255        | 65.546765  |            |            | 1 |

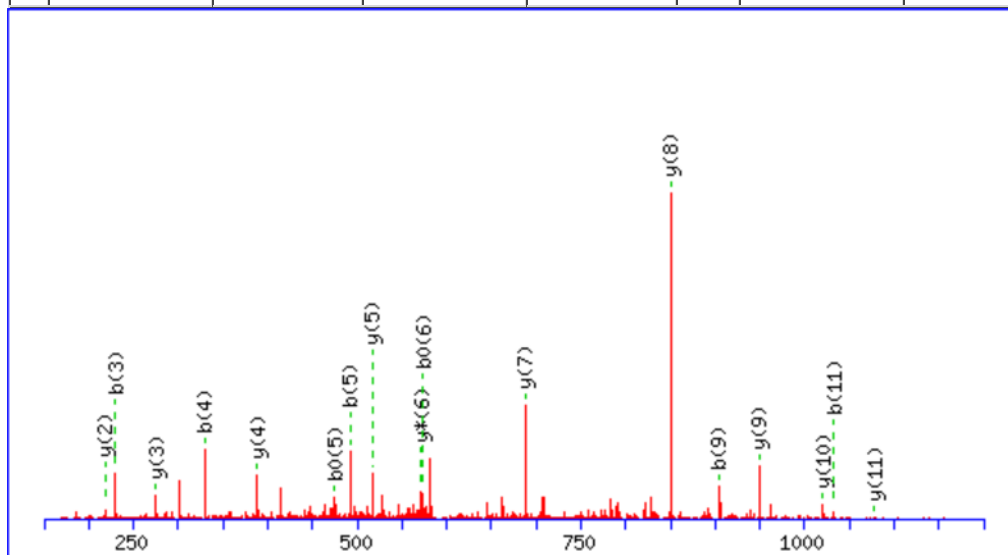

## Peptide View

MS/MS Fragmentation of **TATFAISILQQIELDLK**

Found in **IPI00025491**, Tax\_Id=9606 Gene\_Symbol=EIF4A1;SNORA67 Eukaryotic initiation factor 4A-I

**Experiment:** 34 - OPB-1 **Fraction:** OPB-1

Match to Query 13106: 1903.067848 from(952.541200,2+)

Title: OECHL100310\_17.23067.23067.2.dta

Data file \\BOROMIR\Masse\Data LTQ-Orbitrap\Chrystelle Lacroix\Etude clinique sJPU\OECHL100310\_17.raw

**Monoisotopic mass of neutral peptide Mr(calc):** 1903.066605 **Fixed modifications:** Carbamidomethyl (C) (apply to specified residues or termini only) **Ions Score:** 53

**Expect:** 0.00011**Matches :** 27/170 fragment ions using 64 most intense peaks ([help](#))

| #  | b                  | b <sup>++</sup> | b <sup>*</sup>     | b <sup>*++</sup> | b <sup>0</sup>     | b <sup>0++</sup> | Seq. | y                  | y <sup>++</sup> | y <sup>*</sup> | y <sup>*++</sup> | y <sup>0</sup>    | y <sup>0++</sup>  | #  |
|----|--------------------|-----------------|--------------------|------------------|--------------------|------------------|------|--------------------|-----------------|----------------|------------------|-------------------|-------------------|----|
| 1  | 102.054955         | 51.531116       |                    |                  | 84.044390          | 42.525833        | T    |                    |                 |                |                  |                   |                   | 17 |
| 2  | 173.092069         | 87.049672       |                    |                  | 155.081504         | 78.044390        | A    | <b>1803.026229</b> | 902.016752      | 1785.999680    | 893.503478       | 1785.015664       | 893.011470        | 16 |
| 3  | 274.139748         | 137.573512      |                    |                  | 256.129183         | 128.568230       | T    | 1731.989115        | 866.498195      | 1714.962566    | 857.984921       | 1713.978550       | 857.492913        | 15 |
| 4  | 421.208162         | 211.107719      |                    |                  | 403.197597         | 202.102436       | F    | 1630.941436        | 815.974356      | 1613.914887    | 807.461081       | 1612.930871       | 806.969073        | 14 |
| 5  | 492.245276         | 246.626276      |                    |                  | <b>474.234711</b>  | 237.620993       | A    | 1483.873022        | 742.440149      | 1466.846473    | 733.926875       | 1465.862457       | 733.434867        | 13 |
| 6  | 605.329340         | 303.168308      |                    |                  | <b>587.318775</b>  | 294.163026       | I    | <b>1412.835908</b> | 706.921592      | 1395.809359    | 698.408317       | 1394.825343       | 697.916309        | 12 |
| 7  | 692.361368         | 346.684322      |                    |                  | <b>674.350803</b>  | 337.679039       | S    | <b>1299.751844</b> | 650.379560      | 1282.725295    | 641.866286       | 1281.741279       | 641.374277        | 11 |
| 8  | 805.445432         | 403.226354      |                    |                  | <b>787.434867</b>  | 394.221071       | I    | <b>1212.719816</b> | 606.863546      | 1195.693267    | 598.350272       | 1194.709251       | 597.858264        | 10 |
| 9  | <b>918.529496</b>  | 459.768386      |                    |                  | 900.518931         | 450.763104       | L    | <b>1099.635752</b> | 550.321514      | 1082.609203    | 541.808240       | 1081.625187       | 541.316231        | 9  |
| 10 | 1046.588074        | 523.797675      | 1029.561525        | 515.284401       | 1028.577509        | 514.792393       | Q    | <b>986.551688</b>  | 493.779482      | 969.525139     | 485.266207       | 968.541123        | 484.774199        | 8  |
| 11 | <b>1174.646652</b> | 587.826964      | 1157.620103        | 579.313690       | 1156.636087        | 578.821682       | Q    | <b>858.493110</b>  | 429.750193      | 841.466561     | 421.236918       | 840.482545        | 420.744910        | 7  |
| 12 | <b>1287.730716</b> | 644.368996      | 1270.704167        | 635.855722       | 1269.720151        | 635.363714       | I    | <b>730.434532</b>  | 365.720904      | 713.407983     | 357.207629       | 712.423967        | <b>356.715621</b> | 6  |
| 13 | <b>1416.773309</b> | 708.890292      | 1399.746760        | 700.377018       | 1398.762744        | 699.885010       | E    | <b>617.350468</b>  | 309.178872      | 600.323919     | 300.665597       | <b>599.339903</b> | 300.173589        | 5  |
| 14 | <b>1529.857373</b> | 765.432324      | <b>1512.830824</b> | 756.919050       | 1511.846808        | 756.427042       | L    | <b>488.307875</b>  | 244.657575      | 471.281326     | 236.144301       | 470.297310        | 235.652293        | 4  |
| 15 | <b>1644.884316</b> | 822.945796      | 1627.857767        | 814.432522       | <b>1626.873751</b> | 813.940513       | D    | <b>375.223811</b>  | 188.115543      | 358.197262     | 179.602269       | 357.213246        | 179.110261        | 3  |
| 16 | <b>1757.968380</b> | 879.487828      | <b>1740.941831</b> | 870.974553       | 1739.957815        | 870.482545       | L    | 260.196868         | 130.602072      | 243.170319     | 122.088797       |                   |                   | 2  |
| 17 |                    |                 |                    |                  |                    |                  | K    | 147.112804         | 74.060040       | 130.086255     | 65.546765        |                   |                   | 1  |

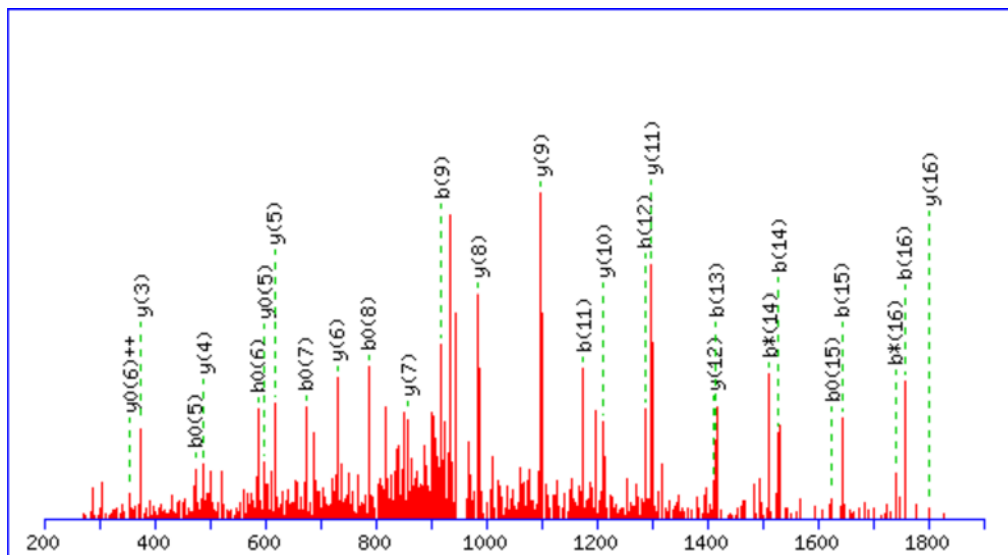

## Peptide View

MS/MS Fragmentation of **LLIYDASNLETGVPSR**

Found in **IPI00003111**, Tax\_Id=9606 Gene\_Symbol=LOC652694 Ig kappa chain V-I region AU

**Experiment:** 34 - OPB-1 **Fraction:** OPB-1

Match to Query 11754: 1746.916848 from(874.465700,2+)

Title: OECHL100310\_17.17056.17056.2.dta

Data file \\BOROMIR\Masse\Data LTQ-Orbitrap\Chrystelle Lacroix\Etude clinique sJPU\OECHL100310\_17.raw

**Monoisotopic mass of neutral peptide Mr(calc):** 1746.915192 **Fixed modifications:** Carbamidomethyl (C) (apply to specified residues or termini only) **Ions Score:** 53

**Expect:** 0.00054 **Matches :** 23/156 fragment ions using 45 most intense peaks ([help](#))

| # | b                 | b <sup>++</sup> | b* | b <sup>*++</sup> | b <sup>0</sup> | b <sup>0++</sup> | Seq. | y                  | y <sup>++</sup> | y*          | y <sup>*++</sup> | y <sup>0</sup>     | y <sup>0++</sup> | #  |
|---|-------------------|-----------------|----|------------------|----------------|------------------|------|--------------------|-----------------|-------------|------------------|--------------------|------------------|----|
| 1 | 114.091340        | 57.549308       |    |                  |                |                  | L    |                    |                 |             |                  |                    |                  | 16 |
| 2 | 227.175404        | 114.091340      |    |                  |                |                  | L    | 1634.838427        | 817.922852      | 1617.811878 | 809.409577       | 1616.827862        | 808.917569       | 15 |
| 3 | 340.259468        | 170.633372      |    |                  |                |                  | I    | <b>1521.754363</b> | 761.380820      | 1504.727814 | 752.867545       | 1503.743798        | 752.375537       | 14 |
| 4 | 503.322797        | 252.165036      |    |                  |                |                  | Y    | 1408.670299        | 704.838788      | 1391.643750 | 696.325513       | <b>1390.659734</b> | 695.833505       | 13 |
| 5 | <b>618.349740</b> | 309.678508      |    |                  | 600.339175     | 300.673226       | D    | <b>1245.606970</b> | 623.307123      | 1228.580421 | 614.793849       | 1227.596405        | 614.301841       | 12 |
| 6 | <b>689.386854</b> | 345.197065      |    |                  | 671.376289     | 336.191782       | A    | 1130.580027        | 565.793652      | 1113.553478 | 557.280377       | 1112.569462        | 556.788369       | 11 |

|    |                    |                   |                    |            |             |            |   |                    |            |                   |            |                   |            |           |
|----|--------------------|-------------------|--------------------|------------|-------------|------------|---|--------------------|------------|-------------------|------------|-------------------|------------|-----------|
| 7  | 776.418882         | 388.713079        |                    |            | 758.408317  | 379.707796 | S | <b>1059.542913</b> | 530.275095 | 1042.516364       | 521.761820 | 1041.532348       | 521.269812 | <b>10</b> |
| 8  | 890.461809         | 445.734542        | 873.435260         | 437.221268 | 872.451244  | 436.729260 | N | <b>972.510885</b>  | 486.759081 | 955.484336        | 478.245806 | 954.500320        | 477.753798 | <b>9</b>  |
| 9  | <b>1003.545873</b> | 502.276574        | 986.519324         | 493.763300 | 985.535308  | 493.271292 | L | 858.467958         | 429.737617 | 841.441409        | 421.224343 | 840.457393        | 420.732335 | <b>8</b>  |
| 10 | <b>1132.588466</b> | 566.797871        | 1115.561917        | 558.284597 | 1114.577901 | 557.792588 | E | <b>745.383894</b>  | 373.195585 | 728.357345        | 364.682311 | 727.373329        | 364.190303 | <b>7</b>  |
| 11 | <b>1233.636145</b> | <b>617.321710</b> | 1216.609596        | 608.808436 | 1215.625580 | 608.316428 | T | <b>616.341301</b>  | 308.674289 | 599.314752        | 300.161014 | 598.330736        | 299.669006 | <b>6</b>  |
| 12 | <b>1290.657609</b> | 645.832442        | 1273.631060        | 637.319168 | 1272.647044 | 636.827160 | G | <b>515.293622</b>  | 258.150449 | 498.267073        | 249.637175 | 497.283057        | 249.145167 | <b>5</b>  |
| 13 | <b>1389.726023</b> | 695.366649        | <b>1372.699474</b> | 686.853375 | 1371.715458 | 686.361367 | V | <b>458.272158</b>  | 229.639717 | 441.245609        | 221.126443 | 440.261593        | 220.634435 | <b>4</b>  |
| 14 | 1486.778787        | <b>743.893032</b> | 1469.752238        | 735.379757 | 1468.768222 | 734.887749 | P | <b>359.203744</b>  | 180.105510 | <b>342.177195</b> | 171.592236 | <b>341.193179</b> | 171.100228 | <b>3</b>  |
| 15 | <b>1573.810815</b> | 787.409046        | 1556.784266        | 778.895771 | 1555.800250 | 778.403763 | S | 262.150980         | 131.579128 | 245.124431        | 123.065854 | 244.140415        | 122.573846 | <b>2</b>  |
| 16 |                    |                   |                    |            |             |            | R | 175.118952         | 88.063114  | 158.092403        | 79.549839  |                   |            | <b>1</b>  |

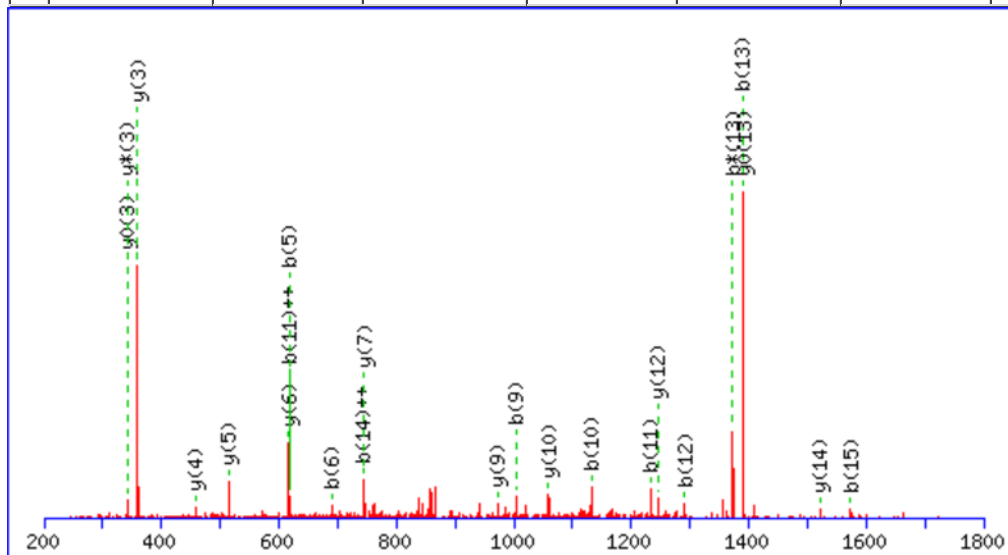

## Peptide View

MS/MS Fragmentation of **LAADDPEVR**

Found in **IPI00025840**, Tax\_Id=9606 Gene\_Symbol=EFNA1 Isoform 1 of Ephrin-A1

**Experiment:** 34 - OPB-1 **Fraction:** OPB-1

Match to Query 2630: 984.487048 from(493.250800,2+)

Title: OECHL100310\_17.5191.5191.2.dta

Data file \\BOROMIR\Masse\Data LTQ-Orbitrap\Chrystelle Lacroix\Etude clinique sJPU\OECHL100310\_17.raw

**Monoisotopic mass of neutral peptide Mr(calc):** 984.487610**Fixed modifications:** Carbamidomethyl (C) (apply to specified residues or termini only)**Ions Score:** 52**Expect:** 0.00043**Matches :** 16/70 fragment ions using 27 most intense peaks ([help](#))

| # | b          | b <sup>++</sup> | b <sup>0</sup> | b <sup>0++</sup> | Seq. | y          | y <sup>++</sup> | y*         | y <sup>*++</sup> | y <sup>0</sup> | y <sup>0++</sup> | # |
|---|------------|-----------------|----------------|------------------|------|------------|-----------------|------------|------------------|----------------|------------------|---|
| 1 | 114.091340 | 57.549308       |                |                  | L    |            |                 |            |                  |                |                  | 9 |
| 2 | 185.128454 | 93.067865       |                |                  | A    | 872.410837 | 436.709057      | 855.384288 | 428.195782       | 854.400272     | 427.703774       | 8 |
| 3 | 256.165568 | 128.586422      |                |                  | A    | 801.373723 | 401.190500      | 784.347174 | 392.677225       | 783.363158     | 392.185217       | 7 |
| 4 | 371.192511 | 186.099893      | 353.181946     | 177.094611       | D    | 730.336609 | 365.671943      | 713.310060 | 357.158668       | 712.326044     | 356.666660       | 6 |
| 5 | 486.219454 | 243.613365      | 468.208889     | 234.608082       | D    | 615.309666 | 308.158471      | 598.283117 | 299.645197       | 597.299101     | 299.153189       | 5 |
| 6 | 583.272218 | 292.139747      | 565.261653     | 283.134465       | P    | 500.282723 | 250.644999      | 483.256174 | 242.131725       | 482.272158     | 241.639717       | 4 |
| 7 | 712.314811 | 356.661044      | 694.304246     | 347.655761       | E    | 403.229959 | 202.118617      | 386.203410 | 193.605343       | 385.219394     | 193.113335       | 3 |
| 8 | 811.383225 | 406.195251      | 793.372660     | 397.189968       | V    | 274.187366 | 137.597321      | 257.160817 | 129.084046       |                |                  | 2 |
| 9 |            |                 |                |                  | R    | 175.118952 | 88.063114       | 158.092403 | 79.549839        |                |                  | 1 |

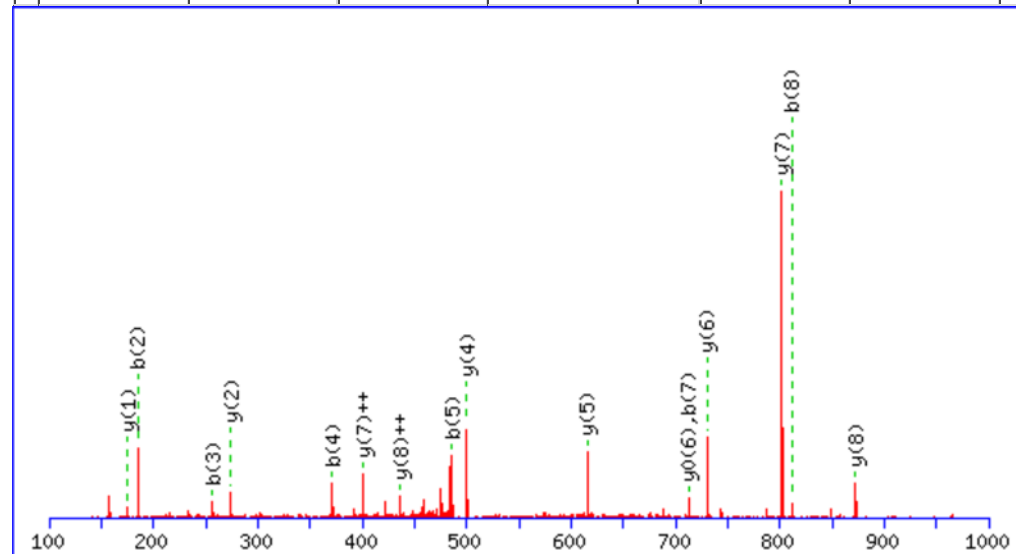

## Peptide View

MS/MS Fragmentation of **HSFKGEECPAGSHR**



Found in **IPI00021970**, Tax\_Id=9606 Gene\_Symbol=MGC31957;TNFRSF10C TNFRSF10C protein

**Experiment:** 04 - S\_B-1 **Fraction:** S\_B-1

Match to Query 9745: 1597.706248 from(799.860400,2+)

Title: OECHL100310\_15.2373.2373.2.dta

Data file \\BOROMIR\Masse\Data LTQ-Orbitrap\Chrystelle Lacroix\Etude clinique sJPU\OECHL100310\_15.raw

**Monoisotopic mass of neutral peptide Mr(calc):** 1597.705566**Fixed modifications:** Carbamidomethyl (C) (apply to specified residues or termini only)**Ions Score:** 52

**Expect:** 0.00041**Matches :** 35/144 fragment ions using 84 most intense peaks ([help](#))

| #  | b                  | b <sup>++</sup>   | b <sup>*</sup>     | b <sup>*++</sup>  | b <sup>0</sup>     | b <sup>0++</sup>  | Seq. | y                  | y <sup>++</sup>   | y <sup>*</sup> | y <sup>*++</sup> | y <sup>0</sup>     | y <sup>0++</sup> | #  |
|----|--------------------|-------------------|--------------------|-------------------|--------------------|-------------------|------|--------------------|-------------------|----------------|------------------|--------------------|------------------|----|
| 1  | 138.066188         | 69.536732         |                    |                   |                    |                   | H    |                    |                   |                |                  |                    |                  | 14 |
| 2  | 225.098216         | 113.052746        |                    |                   | 207.087651         | 104.047463        | S    | <b>1461.653938</b> | 731.330607        | 1444.627389    | 722.817333       | <b>1443.643373</b> | 722.325325       | 13 |
| 3  | <b>372.166630</b>  | 186.586953        |                    |                   | <b>354.156065</b>  | 177.581671        | F    | <b>1374.621910</b> | <b>687.814593</b> | 1357.595361    | 679.301319       | <b>1356.611345</b> | 678.809311       | 12 |
| 4  | <b>500.261593</b>  | 250.634435        | <b>483.235044</b>  | 242.121160        | <b>482.251028</b>  | 241.629152        | K    | <b>1227.553496</b> | <b>614.280386</b> | 1210.526947    | 605.767112       | 1209.542931        | 605.275104       | 11 |
| 5  | 557.283057         | 279.145167        | 540.256508         | 270.631892        | <b>539.272492</b>  | 270.139884        | G    | <b>1099.458533</b> | 550.232905        | 1082.431984    | 541.719630       | 1081.447968        | 541.227622       | 10 |
| 6  | <b>686.325650</b>  | 343.666463        | 669.299101         | 335.153189        | 668.315085         | 334.661181        | E    | 1042.437069        | 521.722173        | 1025.410520    | 513.208898       | 1024.426504        | 512.716890       | 9  |
| 7  | 815.368243         | 408.187760        | 798.341694         | <b>399.674485</b> | 797.357678         | <b>399.182477</b> | E    | <b>913.394476</b>  | 457.200876        | 896.367927     | 448.687602       | 895.383911         | 448.195594       | 8  |
| 8  | <b>975.398892</b>  | 488.203084        | <b>958.372343</b>  | 479.689810        | 957.388327         | 479.197802        | C    | <b>784.351883</b>  | 392.679580        | 767.325334     | 384.166305       | 766.341318         | 383.674297       | 7  |
| 9  | 1072.451656        | 536.729466        | 1055.425107        | 528.216192        | 1054.441091        | 527.724184        | P    | <b>624.321234</b>  | <b>312.664255</b> | 607.294685     | 304.150981       | 606.310669         | 303.658973       | 6  |
| 10 | <b>1143.488770</b> | 572.248023        | <b>1126.462221</b> | 563.734749        | 1125.478205        | 563.242741        | A    | <b>527.268470</b>  | 264.137873        | 510.241921     | 255.624598       | 509.257905         | 255.132590       | 5  |
| 11 | <b>1200.510234</b> | 600.758755        | 1183.483685        | 592.245481        | 1182.499669        | 591.753473        | G    | <b>456.231356</b>  | 228.619316        | 439.204807     | 220.106041       | 438.220791         | 219.614033       | 4  |
| 12 | <b>1287.542262</b> | 644.274769        | <b>1270.515713</b> | 635.761495        | 1269.531697        | 635.269487        | S    | <b>399.209892</b>  | 200.108584        | 382.183343     | 191.595309       | 381.199327         | 191.103301       | 3  |
| 13 | <b>1424.601174</b> | <b>712.804225</b> | 1407.574625        | 704.290951        | <b>1406.590609</b> | 703.798943        | H    | <b>312.177864</b>  | 156.592570        | 295.151315     | 148.079295       |                    |                  | 2  |
| 14 |                    |                   |                    |                   |                    |                   | R    | 175.118952         | 88.063114         | 158.092403     | 79.549839        |                    |                  | 1  |

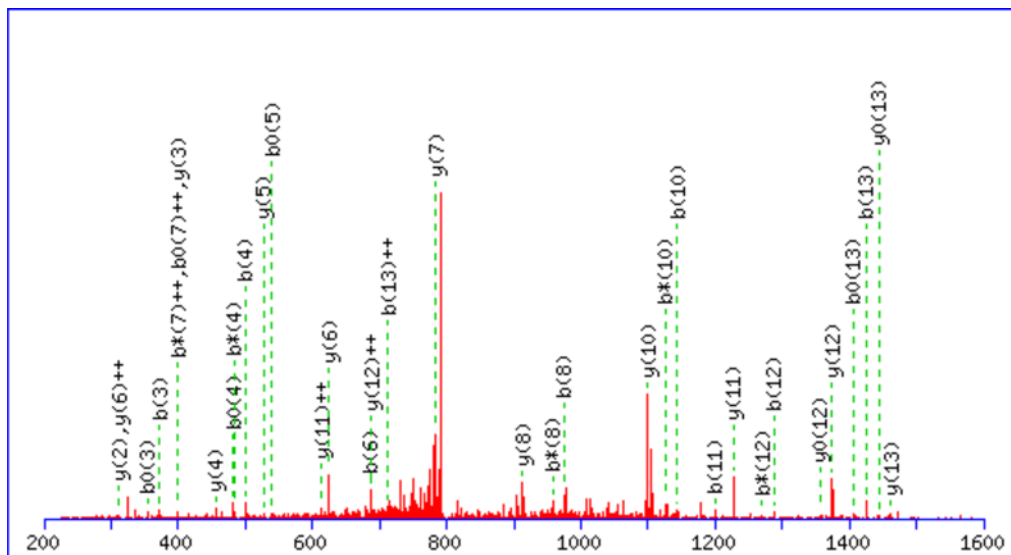

## Peptide View

MS/MS Fragmentation of **LSSGLVTAALYGR**

Found in **IPI00218413**, Tax\_Id=9606 Gene\_Symbol=BTD Biotinidase

**Experiment:** 04 - S\_B-1 **Fraction:** S\_B-1

Match to Query 6811: 1306.726248 from(654.370400,2+)

Title: OECHL100310\_15.17030.17030.2.dta

Data file \\BOROMIR\Masse\Data LTQ-Orbitrap\Chrystelle Lacroix\Etude clinique sJPU\OECHL100310\_15.raw

**Monoisotopic mass of neutral peptide Mr(calc):** 1306.724487 **Fixed modifications:** Carbamidomethyl (C) (apply to specified residues or termini only) **Ions Score:** 75

**Expect:** 1.3e-006 **Matches :** 19/106 fragment ions using 35 most intense peaks ([help](#))

| # | b                 | b <sup>++</sup> | b <sup>0</sup>    | b <sup>0++</sup> | Seq. | y                  | y <sup>++</sup> | y <sup>*</sup>     | y <sup>*++</sup> | y <sup>0</sup> | y <sup>0++</sup> | #  |
|---|-------------------|-----------------|-------------------|------------------|------|--------------------|-----------------|--------------------|------------------|----------------|------------------|----|
| 1 | 114.091340        | 57.549308       |                   |                  | L    |                    |                 |                    |                  |                |                  | 13 |
| 2 | 201.123368        | 101.065322      | 183.112803        | 92.060039        | S    | <b>1194.647714</b> | 597.827495      | <b>1177.621165</b> | 589.314221       | 1176.637149    | 588.822212       | 12 |
| 3 | 288.155396        | 144.581336      | 270.144831        | 135.576053       | S    | <b>1107.615686</b> | 554.311481      | 1090.589137        | 545.798206       | 1089.605121    | 545.306198       | 11 |
| 4 | <b>345.176860</b> | 173.092068      | <b>327.166295</b> | 164.086785       | G    | <b>1020.583658</b> | 510.795467      | 1003.557109        | 502.282192       | 1002.573093    | 501.790184       | 10 |
| 5 | <b>458.260924</b> | 229.634100      | <b>440.250359</b> | 220.628817       | L    | <b>963.562194</b>  | 482.284735      | 946.535645         | 473.771460       | 945.551629     | 473.279452       | 9  |
| 6 | <b>557.329338</b> | 279.168307      | 539.318773        | 270.163025       | V    | <b>850.478130</b>  | 425.742703      | 833.451581         | 417.229428       | 832.467565     | 416.737420       | 8  |

|    |             |            |             |            |   |            |            |            |            |            |            |   |
|----|-------------|------------|-------------|------------|---|------------|------------|------------|------------|------------|------------|---|
| 7  | 658.377017  | 329.692147 | 640.366452  | 320.686864 | T | 751.409716 | 376.208496 | 734.383167 | 367.695221 | 733.399151 | 367.203213 | 7 |
| 8  | 729.414131  | 365.210704 | 711.403566  | 356.205421 | A | 650.362037 | 325.684656 | 633.335488 | 317.171382 |            |            | 6 |
| 9  | 800.451245  | 400.729261 | 782.440680  | 391.723978 | A | 579.324923 | 290.166099 | 562.298374 | 281.652825 |            |            | 5 |
| 10 | 913.535309  | 457.271293 | 895.524744  | 448.266010 | L | 508.287809 | 254.647542 | 491.261260 | 246.134268 |            |            | 4 |
| 11 | 1076.598638 | 538.802957 | 1058.588073 | 529.797674 | Y | 395.203745 | 198.105510 | 378.177196 | 189.592236 |            |            | 3 |
| 12 | 1133.620102 | 567.313689 | 1115.609537 | 558.308406 | G | 232.140416 | 116.573846 | 215.113867 | 108.060571 |            |            | 2 |
| 13 |             |            |             |            | R | 175.118952 | 88.063114  | 158.092403 | 79.549839  |            |            | 1 |

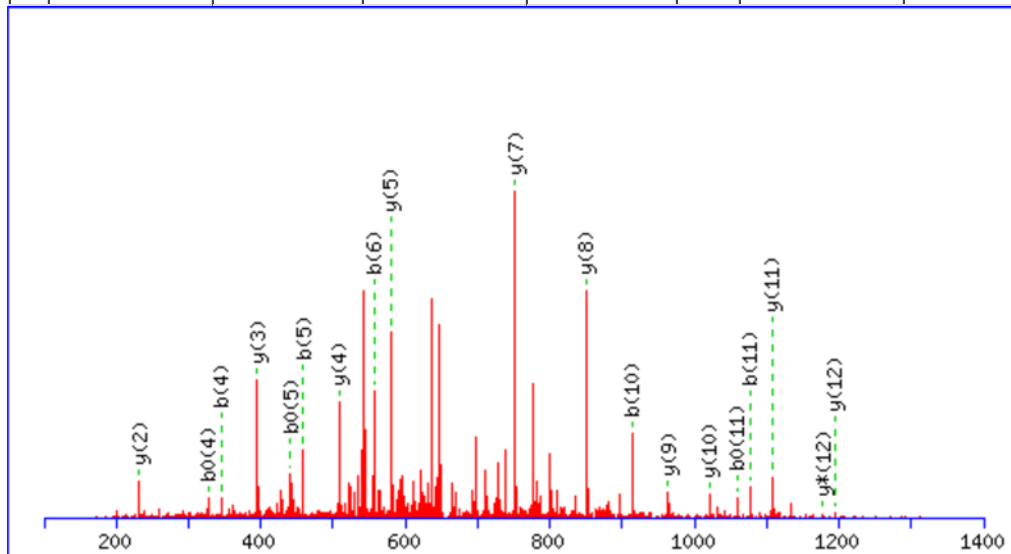

## Peptide View

MS/MS Fragmentation of **GGVVLKEDALPGQK**

Found in **IPI00019906**, Tax\_Id=9606 Gene\_Symbol=BSG Isoform 2 of Basigin

**Experiment:** 04 - S\_B-1 **Fraction:** S\_B-1

Match to Query 7908: 1409.787448 from(705.901000,2+)

Title: OECHL100310\_15.9534.9534.2.dta

Data file \\BOROMIR\Masse\Data LTQ-Orbitrap\Chrystelle Lacroix\Etude clinique sJPU\OECHL100310\_15.raw

**Monoisotopic mass of neutral peptide Mr(calc):** 1409.787827 **Fixed modifications:** Carbamidomethyl (C) (apply to specified residues or termini only) **Ions Score:** 61

**Expect:** 3.3e-005 **Matches :** 32/122 fragment ions using 70 most intense peaks ([help](#))

| #  | b                  | b <sup>++</sup> | b*          | b <sup>*++</sup>  | b <sup>0</sup> | b <sup>0++</sup>  | Seq. | y                  | y <sup>++</sup>   | y*                 | y <sup>*++</sup> | y <sup>0</sup>     | y <sup>0++</sup> | #  |
|----|--------------------|-----------------|-------------|-------------------|----------------|-------------------|------|--------------------|-------------------|--------------------|------------------|--------------------|------------------|----|
| 1  | 58.028740          | 29.518008       |             |                   |                |                   | G    |                    |                   |                    |                  |                    |                  | 14 |
| 2  | 115.050204         | 58.028740       |             |                   |                |                   | G    | 1353.773643        | 677.390460        | 1336.747094        | 668.877185       | 1335.763078        | 668.385177       | 13 |
| 3  | <b>214.118618</b>  | 107.562947      |             |                   |                |                   | V    | 1296.752179        | 648.879728        | 1279.725630        | 640.366453       | 1278.741614        | 639.874445       | 12 |
| 4  | <b>313.187032</b>  | 157.097154      |             |                   |                |                   | V    | <b>1197.683765</b> | <b>599.345521</b> | 1180.657216        | 590.832246       | 1179.673200        | 590.340238       | 11 |
| 5  | <b>426.271096</b>  | 213.639186      |             |                   |                |                   | L    | <b>1098.615351</b> | <b>549.811314</b> | <b>1081.588802</b> | 541.298039       | <b>1080.604786</b> | 540.806031       | 10 |
| 6  | <b>554.366059</b>  | 277.686668      | 537.339510  | 269.173393        |                |                   | K    | <b>985.531287</b>  | <b>493.269282</b> | 968.504738         | 484.756007       | 967.520722         | 484.263999       | 9  |
| 7  | <b>683.408652</b>  | 342.207964      | 666.382103  | 333.694690        | 665.398087     | 333.202682        | E    | <b>857.436324</b>  | <b>429.221800</b> | 840.409775         | 420.708526       | <b>839.425759</b>  | 420.216518       | 8  |
| 8  | <b>798.435595</b>  | 399.721436      | 781.409046  | 391.208161        | 780.425030     | 390.716153        | D    | <b>728.393731</b>  | 364.700504        | 711.367182         | 356.187229       | 710.383166         | 355.695221       | 7  |
| 9  | <b>869.472709</b>  | 435.239993      | 852.446160  | <b>426.726718</b> | 851.462144     | <b>426.234710</b> | A    | <b>613.366788</b>  | 307.187032        | 596.340239         | 298.673758       |                    |                  | 6  |
| 10 | <b>982.556773</b>  | 491.782025      | 965.530224  | 483.268750        | 964.546208     | 482.776742        | L    | <b>542.329674</b>  | 271.668475        | 525.303125         | 263.155201       |                    |                  | 5  |
| 11 | <b>1079.609537</b> | 540.308407      | 1062.582988 | 531.795132        | 1061.598972    | 531.303124        | P    | <b>429.245610</b>  | 215.126443        | 412.219061         | 206.613169       |                    |                  | 4  |
| 12 | <b>1136.631001</b> | 568.819139      | 1119.604452 | <b>560.305864</b> | 1118.620436    | <b>559.813856</b> | G    | <b>332.192846</b>  | 166.600061        | 315.166297         | 158.086787       |                    |                  | 3  |
| 13 | <b>1264.689579</b> | 632.848428      | 1247.663030 | 624.335153        | 1246.679014    | 623.843145        | Q    | 275.171382         | 138.089329        | <b>258.144833</b>  | 129.576055       |                    |                  | 2  |
| 14 |                    |                 |             |                   |                |                   | K    | 147.112804         | 74.060040         | 130.086255         | 65.546765        |                    |                  | 1  |

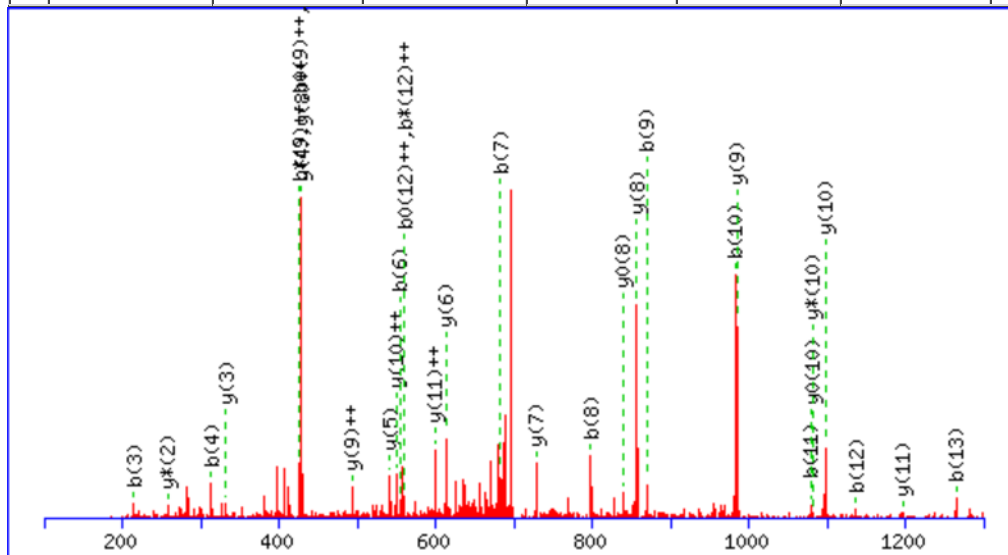

## Peptide View

MS/MS Fragmentation of **NIETIINTFHQYSVK**

Found in **IPI00027462**, Tax\_Id=9606 Gene\_Symbol=S100A9 Protein S100-A9

**Experiment:** 04 - S\_B-1 **Fraction:** S\_B-1

Match to Query 11636: 1805.931848 from(903.973200,2+)

Title: OECHL100310\_15.19344.19344.2.dta

Data file \\BOROMIR\Masse\Data LTQ-Orbitrap\Chrystelle Lacroix\Etude clinique sJPU\OECHL100310\_15.raw

**Monoisotopic mass of neutral peptide Mr(calc):** 1805.931183 **Fixed modifications:** Carbamidomethyl (C) (apply to specified residues or termini only) **Ions Score:** 76

**Expect:** 3.1e-006 **Matches :** 39/160 fragment ions using 46 most intense peaks ([help](#))

| #  | b                  | b <sup>++</sup>   | b <sup>*</sup>     | b <sup>*++</sup>  | b <sup>0</sup>    | b <sup>0++</sup>  | Seq. | y                  | y <sup>++</sup>   | y <sup>*</sup>     | y <sup>*++</sup>  | y <sup>0</sup>     | y <sup>0++</sup>  | #  |
|----|--------------------|-------------------|--------------------|-------------------|-------------------|-------------------|------|--------------------|-------------------|--------------------|-------------------|--------------------|-------------------|----|
| 1  | 115.050203         | 58.028740         | 98.023654          | 49.515465         |                   |                   | N    |                    |                   |                    |                   |                    |                   | 15 |
| 2  | 228.134267         | 114.570771        | 211.107718         | 106.057497        |                   |                   | I    | <b>1692.895549</b> | 846.951413        | 1675.869000        | 838.438138        | 1674.884984        | 837.946130        | 14 |
| 3  | <b>357.176860</b>  | 179.092068        | 340.150311         | 170.578793        | 339.166295        | 170.086785        | E    | <b>1579.811485</b> | <b>790.409381</b> | 1562.784936        | <b>781.896106</b> | <b>1561.800920</b> | <b>781.404098</b> | 13 |
| 4  | <b>458.224539</b>  | 229.615907        | <b>441.197990</b>  | 221.102633        | <b>440.213974</b> | 220.610625        | T    | <b>1450.768892</b> | <b>725.888084</b> | 1433.742343        | 717.374810        | 1432.758327        | 716.882802        | 12 |
| 5  | <b>571.308603</b>  | 286.157940        | <b>554.282054</b>  | 277.644665        | <b>553.298038</b> | 277.152657        | I    | <b>1349.721213</b> | 675.364245        | 1332.694664        | 666.850970        | 1331.710648        | 666.358962        | 11 |
| 6  | 684.392667         | 342.699972        | 667.366118         | 334.186697        | 666.382102        | <b>333.694689</b> | I    | <b>1236.637149</b> | 618.822213        | <b>1219.610600</b> | 610.308938        | 1218.626584        | 609.816930        | 10 |
| 7  | 798.435594         | 399.721435        | <b>781.409045</b>  | 391.208161        | 780.425029        | 390.716153        | N    | <b>1123.553085</b> | 562.280181        | 1106.526536        | 553.766906        | 1105.542520        | <b>553.274898</b> | 9  |
| 8  | 899.483273         | 450.245275        | 882.456724         | <b>441.732000</b> | 881.472708        | <b>441.239992</b> | T    | <b>1009.510158</b> | 505.258717        | 992.483609         | <b>496.745443</b> | 991.499593         | <b>496.253435</b> | 8  |
| 9  | 1046.551687        | 523.779482        | 1029.525138        | 515.266207        | 1028.541122       | 514.774199        | F    | 908.462479         | 454.734878        | 891.435930         | 446.221603        | 890.451914         | 445.729595        | 7  |
| 10 | 1183.610599        | 592.308938        | 1166.584050        | 583.795663        | 1165.600034       | 583.303655        | H    | <b>761.394065</b>  | 381.200671        | 744.367516         | 372.687396        | 743.383500         | 372.195388        | 6  |
| 11 | <b>1311.669177</b> | 656.338227        | 1294.642628        | 647.824952        | 1293.658612       | 647.332944        | Q    | <b>624.335153</b>  | 312.671215        | <b>607.308604</b>  | 304.157940        | 606.324588         | 303.665932        | 5  |
| 12 | <b>1474.732506</b> | 737.869891        | <b>1457.705957</b> | 729.356617        | 1456.721941       | 728.864609        | Y    | <b>496.276575</b>  | 248.641926        | 479.250026         | 240.128651        | 478.266010         | 239.636643        | 4  |
| 13 | <b>1561.764534</b> | <b>781.385905</b> | 1544.737985        | 772.872631        | 1543.753969       | 772.380623        | S    | <b>333.213246</b>  | 167.110261        | 316.186697         | 158.596987        | 315.202681         | 158.104979        | 3  |
| 14 | <b>1660.832948</b> | 830.920112        | <b>1643.806399</b> | 822.406838        | 1642.822383       | 821.914830        | V    | 246.181218         | 123.594247        | 229.154669         | 115.080973        |                    |                   | 2  |
| 15 |                    |                   |                    |                   |                   |                   | K    | 147.112804         | 74.060040         | 130.086255         | 65.546765         |                    |                   | 1  |

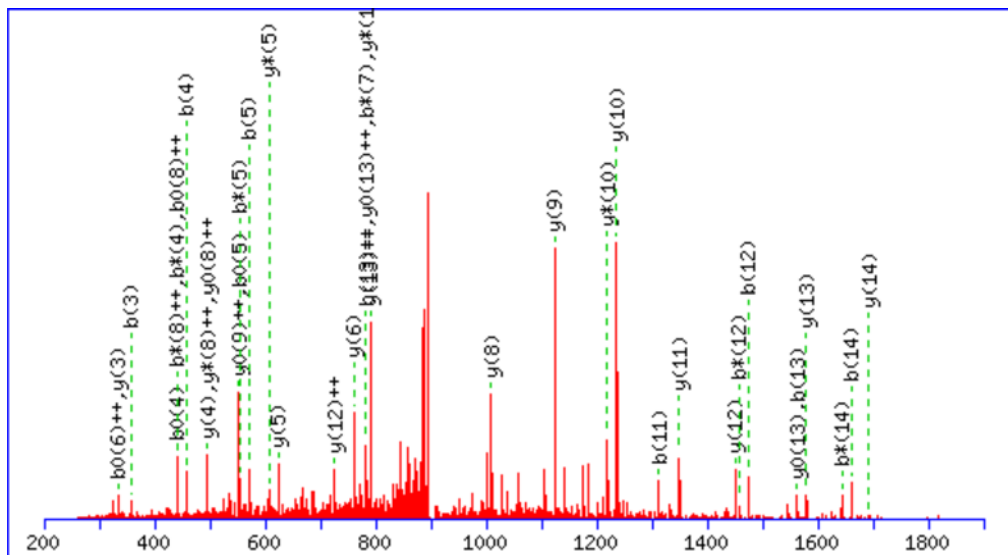

## Peptide View

MS/MS Fragmentation of **TVAGPVGGSLSVQCPYEKEHR**

Found in **IPI00414784**, Tax\_Id=9606 Gene\_Symbol=CD300A Isoform 1 of CMRF35-like molecule 8

**Experiment:** 04 - S\_B-1 **Fraction:** S\_B-1

Match to Query 14664: 2270.115448 from(1136.065000,2+)

Title: OECHL100310\_15.10236.10236.2.dta

Data file \\BOROMIR\Masse\Data LTQ-Orbitrap\Chrystelle Lacroix\Etude clinique sJPU\OECHL100310\_15.raw

**Monoisotopic mass of neutral peptide Mr(calc):** 2270.111374 **Fixed modifications:** Carbamidomethyl (C) (apply to specified residues or termini only) **Ions Score:** 71

**Expect:** 1.7e-005 **Matches :** 20/212 fragment ions using 34 most intense peaks ([help](#))

| # | b          | b <sup>++</sup> | b <sup>*</sup> | b <sup>*++</sup> | b <sup>0</sup>    | b <sup>0++</sup> | Seq.     | y           | y <sup>++</sup>    | y <sup>*</sup> | y <sup>*++</sup> | y <sup>0</sup> | y <sup>0++</sup> |
|---|------------|-----------------|----------------|------------------|-------------------|------------------|----------|-------------|--------------------|----------------|------------------|----------------|------------------|
| 1 | 102.054955 | 51.531116       |                |                  | 84.044390         | 42.525833        | <b>T</b> |             |                    |                |                  |                |                  |
| 2 | 201.123369 | 101.065322      |                |                  | 183.112804        | 92.060040        | <b>V</b> | 2170.070965 | 1085.539120        | 2153.044416    | 1077.025846      | 2152.060400    | 1076.5338        |
| 3 | 272.160483 | 136.583879      |                |                  | 254.149918        | 127.578597       | <b>A</b> | 2071.002551 | <b>1036.004913</b> | 2053.976002    | 1027.491639      | 2052.991986    | 1026.9996        |
| 4 | 329.181947 | 165.094611      |                |                  | 311.171382        | 156.089329       | <b>G</b> | 1999.965437 | <b>1000.486357</b> | 1982.938888    | 991.973082       | 1981.954872    | 991.4810         |
| 5 | 426.234711 | 213.620994      |                |                  | 408.224146        | 204.615711       | <b>P</b> | 1942.943973 | 971.975625         | 1925.917424    | 963.462350       | 1924.933408    | 962.9703         |
| 6 | 525.303125 | 263.155201      |                |                  | <b>507.292560</b> | 254.149918       | <b>V</b> | 1845.891209 | 923.449243         | 1828.864660    | 914.935968       | 1827.880644    | 914.4439         |

|    |             |             |             |             |             |             |   |             |            |             |            |             |          |
|----|-------------|-------------|-------------|-------------|-------------|-------------|---|-------------|------------|-------------|------------|-------------|----------|
| 7  | 582.324589  | 291.665933  |             |             | 564.314024  | 282.660650  | G | 1746.822795 | 873.915036 | 1729.796246 | 865.401761 | 1728.812230 | 864.9097 |
| 8  | 639.346053  | 320.176665  |             |             | 621.335488  | 311.171382  | G | 1689.801331 | 845.404304 | 1672.774782 | 836.891029 | 1671.790766 | 836.3990 |
| 9  | 726.378081  | 363.692679  |             |             | 708.367516  | 354.687396  | S | 1632.779867 | 816.893572 | 1615.753318 | 808.380297 | 1614.769302 | 807.8882 |
| 10 | 839.462145  | 420.234711  |             |             | 821.451580  | 411.229428  | L | 1545.747839 | 773.377558 | 1528.721290 | 764.864283 | 1527.737274 | 764.3722 |
| 11 | 926.494173  | 463.750725  |             |             | 908.483608  | 454.745442  | S | 1432.663775 | 716.835526 | 1415.637226 | 708.322251 | 1414.653210 | 707.8302 |
| 12 | 1025.562587 | 513.284932  |             |             | 1007.552022 | 504.279649  | V | 1345.631747 | 673.319512 | 1328.605198 | 664.806237 | 1327.621182 | 664.3142 |
| 13 | 1153.621165 | 577.314221  | 1136.594616 | 568.800946  | 1135.610600 | 568.308938  | Q | 1246.563333 | 623.785305 | 1229.536784 | 615.272030 | 1228.552768 | 614.7800 |
| 14 | 1313.651814 | 657.329545  | 1296.625265 | 648.816271  | 1295.641249 | 648.324263  | C | 1118.504755 | 559.756016 | 1101.478206 | 551.242741 | 1100.494190 | 550.7507 |
| 15 | 1410.704578 | 705.855927  | 1393.678029 | 697.342653  | 1392.694013 | 696.850645  | P | 958.474106  | 479.740691 | 941.447557  | 471.227417 | 940.463541  | 470.7354 |
| 16 | 1573.767907 | 787.387592  | 1556.741358 | 778.874317  | 1555.757342 | 778.382309  | Y | 861.421342  | 431.214309 | 844.394793  | 422.701035 | 843.410777  | 422.2090 |
| 17 | 1702.810500 | 851.908888  | 1685.783951 | 843.395614  | 1684.799935 | 842.903606  | E | 698.358013  | 349.682645 | 681.331464  | 341.169370 | 680.347448  | 340.6773 |
| 18 | 1830.905463 | 915.956370  | 1813.878914 | 907.443095  | 1812.894898 | 906.951087  | K | 569.315420  | 285.161348 | 552.288871  | 276.648074 | 551.304855  | 276.1560 |
| 19 | 1959.948056 | 980.477666  | 1942.921507 | 971.964392  | 1941.937491 | 971.472384  | E | 441.220457  | 221.113867 | 424.193908  | 212.600592 | 423.209892  | 212.1085 |
| 20 | 2097.006968 | 1049.007122 | 2079.980419 | 1040.493847 | 2078.996403 | 1040.001840 | H | 312.177864  | 156.592570 | 295.151315  | 148.079295 |             |          |
| 21 |             |             |             |             |             |             | R | 175.118952  | 88.063114  | 158.092403  | 79.549839  |             |          |

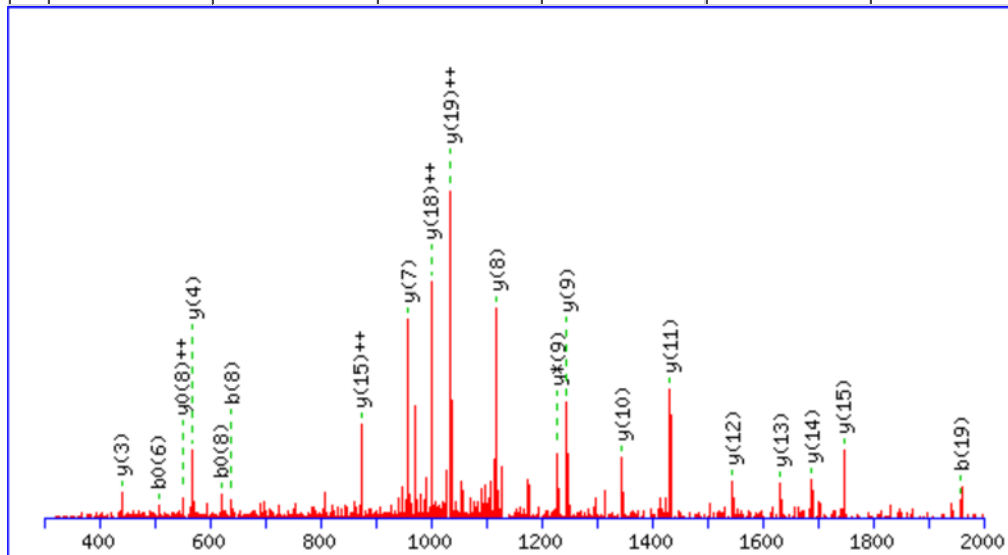

## Peptide View

MS/MS Fragmentation of **ASLQHGQAAEKGP~~HR~~**Found in **IPI00165044**, Tax\_Id=9606 Gene\_Symbol=FAM198B Isoform 2 of Protein ENED**Experiment:** 04 - S\_B-1 **Fraction:** S\_B-1

Match to Query 9652: 1585.809248 from(793.911900,2+)

Title: OECHL100310\_15.2005.2005.2.dta

Data file \\BOROMIR\Masse\Data LTQ-Orbitrap\Chrystelle Lacroix\Etude clinique sJPU\OECHL100310\_15.raw

**Monoisotopic mass of neutral peptide Mr(calc):** 1585.807312 **Fixed modifications:** Carbamidomethyl (C) (apply to specified residues or termini only) **Ions Score:** 51**Expect:** 0.0011 **Matches :** 13/150 fragment ions using 14 most intense peaks ([help](#))

| #  | b           | b <sup>++</sup> | b*          | b <sup>*++</sup> | b <sup>0</sup> | b <sup>0++</sup> | Seq. | y           | y <sup>++</sup> | y*          | y <sup>*++</sup> | y <sup>0</sup> | y <sup>0++</sup> | #  |
|----|-------------|-----------------|-------------|------------------|----------------|------------------|------|-------------|-----------------|-------------|------------------|----------------|------------------|----|
| 1  | 72.044390   | 36.525833       |             |                  |                |                  | A    |             |                 |             |                  |                |                  | 15 |
| 2  | 159.076418  | 80.041847       |             |                  | 141.065853     | 71.036564        | S    | 1515.777500 | 758.392388      | 1498.750951 | 749.879114       | 1497.766935    | 749.387106       | 14 |
| 3  | 272.160482  | 136.583879      |             |                  | 254.149917     | 127.578597       | L    | 1428.745472 | 714.876374      | 1411.718923 | 706.363100       | 1410.734907    | 705.871092       | 13 |
| 4  | 400.219060  | 200.613168      | 383.192511  | 192.099894       | 382.208495     | 191.607886       | Q    | 1315.661408 | 658.334342      | 1298.634859 | 649.821068       | 1297.650843    | 649.329060       | 12 |
| 5  | 537.277972  | 269.142624      | 520.251423  | 260.629350       | 519.267407     | 260.137342       | H    | 1187.602830 | 594.305053      | 1170.576281 | 585.791779       | 1169.592265    | 585.299771       | 11 |
| 6  | 594.299436  | 297.653356      | 577.272887  | 289.140082       | 576.288871     | 288.648074       | G    | 1050.543918 | 525.775597      | 1033.517369 | 517.262323       | 1032.533353    | 516.770315       | 10 |
| 7  | 722.358014  | 361.682645      | 705.331465  | 353.169371       | 704.347449     | 352.677363       | Q    | 993.522454  | 497.264865      | 976.495905  | 488.751591       | 975.511889     | 488.259583       | 9  |
| 8  | 793.395128  | 397.201202      | 776.368579  | 388.687928       | 775.384563     | 388.195920       | A    | 865.463876  | 433.235576      | 848.437327  | 424.722302       | 847.453311     | 424.230294       | 8  |
| 9  | 864.432242  | 432.719759      | 847.405693  | 424.206485       | 846.421677     | 423.714477       | A    | 794.426762  | 397.717019      | 777.400213  | 389.203745       | 776.416197     | 388.711737       | 7  |
| 10 | 993.474835  | 497.241056      | 976.448286  | 488.727781       | 975.464270     | 488.235773       | E    | 723.389648  | 362.198462      | 706.363099  | 353.685188       | 705.379083     | 353.193180       | 6  |
| 11 | 1121.569798 | 561.288537      | 1104.543249 | 552.775263       | 1103.559233    | 552.283255       | K    | 594.347055  | 297.677166      | 577.320506  | 289.163891       |                |                  | 5  |
| 12 | 1178.591262 | 589.799269      | 1161.564713 | 581.285995       | 1160.580697    | 580.793987       | G    | 466.252092  | 233.629684      | 449.225543  | 225.116409       |                |                  | 4  |
| 13 | 1275.644026 | 638.325651      | 1258.617477 | 629.812377       | 1257.633461    | 629.320369       | P    | 409.230628  | 205.118952      | 392.204079  | 196.605677       |                |                  | 3  |
| 14 | 1412.702938 | 706.855107      | 1395.676389 | 698.341833       | 1394.692373    | 697.849825       | H    | 312.177864  | 156.592570      | 295.151315  | 148.079295       |                |                  | 2  |
| 15 |             |                 |             |                  |                |                  | R    | 175.118952  | 88.063114       | 158.092403  | 79.549839        |                |                  | 1  |



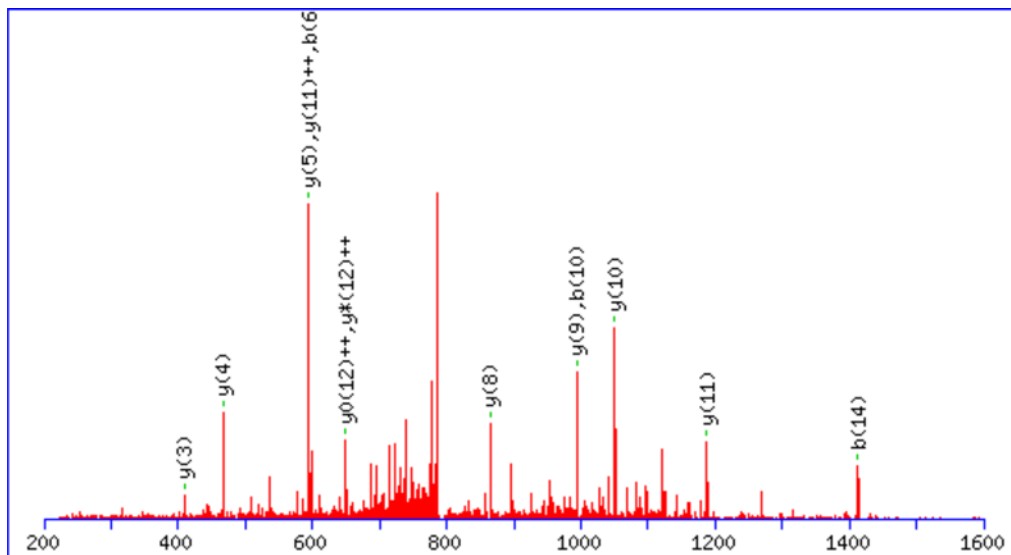

## Peptide View

MS/MS Fragmentation of **LLIYDASNLETGVPSR**

Found in **IPI00003111**, Tax\_Id=9606 Gene\_Symbol=LOC652694 Ig kappa chain V-I region AU

**Experiment:** 04 - S\_B-1 **Fraction:** S\_B-1

Match to Query 11131: 1746.917648 from(874.466100,2+)

Title: OECHL100310\_15.16887.16887.2.dta

Data file \\BOROMIR\Masse\Data LTQ-Orbitrap\Chrystelle Lacroix\Etude clinique sJPU\OECHL100310\_15.raw

**Monoisotopic mass of neutral peptide Mr(calc):** 1746.915192 **Fixed modifications:** Carbamidomethyl (C) (apply to specified residues or termini only) **Ions Score:** 76

**Expect:** 2.4e-006 **Matches :** 20/156 fragment ions using 28 most intense peaks ([help](#))

| # | b          | b <sup>++</sup> | b* | b* <sup>++</sup> | b <sup>0</sup> | b <sup>0++</sup> | Seq. | y                  | y <sup>++</sup>   | y*          | y* <sup>++</sup>  | y <sup>0</sup>     | y <sup>0++</sup>  | #  |
|---|------------|-----------------|----|------------------|----------------|------------------|------|--------------------|-------------------|-------------|-------------------|--------------------|-------------------|----|
| 1 | 114.091340 | 57.549308       |    |                  |                |                  | L    |                    |                   |             |                   |                    |                   | 16 |
| 2 | 227.175404 | 114.091340      |    |                  |                |                  | L    | 1634.838427        | 817.922852        | 1617.811878 | 809.409577        | 1616.827862        | 808.917569        | 15 |
| 3 | 340.259468 | 170.633372      |    |                  |                |                  | I    | <b>1521.754363</b> | <b>761.380820</b> | 1504.727814 | <b>752.867545</b> | 1503.743798        | <b>752.375537</b> | 14 |
| 4 | 503.322797 | 252.165036      |    |                  |                |                  | Y    | 1408.670299        | <b>704.838788</b> | 1391.643750 | 696.325513        | <b>1390.659734</b> | 695.833505        | 13 |
| 5 | 618.349740 | 309.678508      |    |                  | 600.339175     | 300.673226       | D    | <b>1245.606970</b> | 623.307123        | 1228.580421 | 614.793849        | 1227.596405        | 614.301841        | 12 |
| 6 | 689.386854 | 345.197065      |    |                  | 671.376289     | 336.191782       | A    | 1130.580027        | 565.793652        | 1113.553478 | 557.280377        | 1112.569462        | 556.788369        | 11 |

|    |                    |                   |             |            |             |            |   |                    |            |             |            |                   |            |    |
|----|--------------------|-------------------|-------------|------------|-------------|------------|---|--------------------|------------|-------------|------------|-------------------|------------|----|
| 7  | 776.418882         | 388.713079        |             |            | 758.408317  | 379.707796 | S | <b>1059.542913</b> | 530.275095 | 1042.516364 | 521.761820 | 1041.532348       | 521.269812 | 10 |
| 8  | 890.461809         | 445.734542        | 873.435260  | 437.221268 | 872.451244  | 436.729260 | N | <b>972.510885</b>  | 486.759081 | 955.484336  | 478.245806 | 954.500320        | 477.753798 | 9  |
| 9  | 1003.545873        | 502.276574        | 986.519324  | 493.763300 | 985.535308  | 493.271292 | L | <b>858.467958</b>  | 429.737617 | 841.441409  | 421.224343 | 840.457393        | 420.732335 | 8  |
| 10 | <b>1132.588466</b> | 566.797871        | 1115.561917 | 558.284597 | 1114.577901 | 557.792588 | E | <b>745.383894</b>  | 373.195585 | 728.357345  | 364.682311 | 727.373329        | 364.190303 | 7  |
| 11 | 1233.636145        | <b>617.321710</b> | 1216.609596 | 608.808436 | 1215.625580 | 608.316428 | T | <b>616.341301</b>  | 308.674289 | 599.314752  | 300.161014 | 598.330736        | 299.669006 | 6  |
| 12 | <b>1290.657609</b> | 645.832442        | 1273.631060 | 637.319168 | 1272.647044 | 636.827160 | G | <b>515.293622</b>  | 258.150449 | 498.267073  | 249.637175 | 497.283057        | 249.145167 | 5  |
| 13 | <b>1389.726023</b> | 695.366649        | 1372.699474 | 686.853375 | 1371.715458 | 686.361367 | V | <b>458.272158</b>  | 229.639717 | 441.245609  | 221.126443 | 440.261593        | 220.634435 | 4  |
| 14 | 1486.778787        | 743.893032        | 1469.752238 | 735.379757 | 1468.768222 | 734.887749 | P | <b>359.203744</b>  | 180.105510 | 342.177195  | 171.592236 | <b>341.193179</b> | 171.100228 | 3  |
| 15 | 1573.810815        | 787.409046        | 1556.784266 | 778.895771 | 1555.800250 | 778.403763 | S | 262.150980         | 131.579128 | 245.124431  | 123.065854 | 244.140415        | 122.573846 | 2  |
| 16 |                    |                   |             |            |             |            | R | 175.118952         | 88.063114  | 158.092403  | 79.549839  |                   |            | 1  |

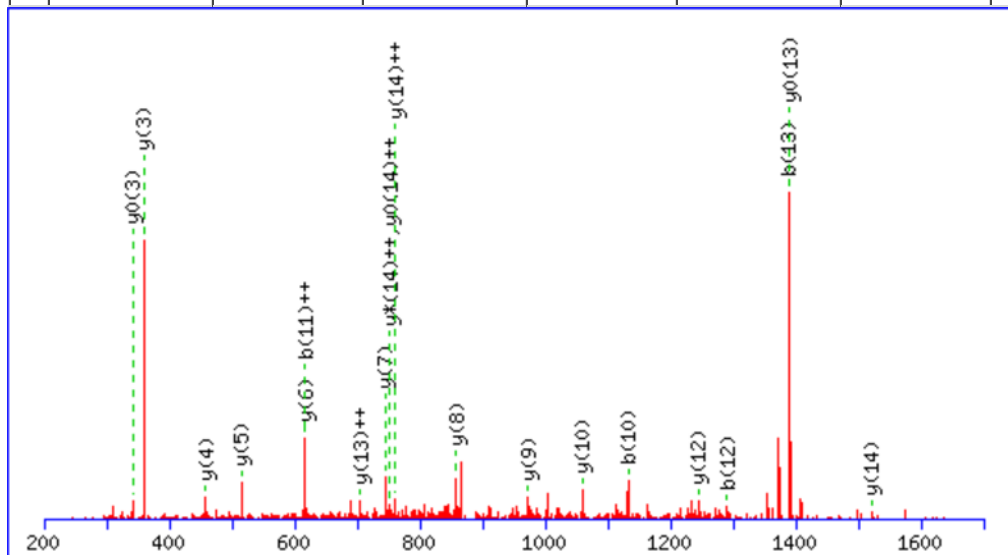

## Peptide View

MS/MS Fragmentation of **SAAVTSEFHLVPSR**

Found in **IP100043992**, Tax\_Id=9606 Gene\_Symbol=PVRL4 Poliovirus receptor-related protein 4

**Experiment:** 04 - S\_B-1 **Fraction:** S\_B-1

Match to Query 8837: 1499.775248 from(750.894900,2+)

Title: OECHL100310\_15.13488.13488.2.dta

Data file \\BOROMIR\Masse\Data LTQ-Orbitrap\Chrystelle Lacroix\Etude clinique sJPU\OECHL100310\_15.raw

**Monoisotopic mass of neutral peptide Mr(calc):** 1499.773239**Fixed modifications:** Carbamidomethyl (C) (apply to specified residues or termini only)**Ions Score:** 61**Expect:** 8.2e-005**Matches :** 25/128 fragment ions using 52 most intense peaks ([help](#))

| #  | b                  | b <sup>++</sup>   | b <sup>0</sup>    | b <sup>0++</sup> | Seq. | y                  | y <sup>++</sup>   | y*          | y* <sup>++</sup> | y <sup>0</sup>    | y <sup>0++</sup> | #  |
|----|--------------------|-------------------|-------------------|------------------|------|--------------------|-------------------|-------------|------------------|-------------------|------------------|----|
| 1  | 88.039304          | 44.523290         | 70.028739         | 35.518008        | S    |                    |                   |             |                  |                   |                  | 14 |
| 2  | 159.076418         | 80.041847         | 141.065853        | 71.036564        | A    | 1413.748490        | 707.377883        | 1396.721941 | 698.864609       | 1395.737925       | 698.372600       | 13 |
| 3  | <b>230.113532</b>  | 115.560404        | 212.102967        | 106.555121       | A    | <b>1342.711376</b> | <b>671.859326</b> | 1325.684827 | 663.346052       | 1324.700811       | 662.854043       | 12 |
| 4  | <b>329.181946</b>  | 165.094611        | <b>311.171381</b> | 156.089328       | V    | <b>1271.674262</b> | <b>636.340769</b> | 1254.647713 | 627.827495       | 1253.663697       | 627.335487       | 11 |
| 5  | 430.229625         | 215.618450        | 412.219060        | 206.613168       | T    | <b>1172.605848</b> | <b>586.806562</b> | 1155.579299 | 578.293288       | 1154.595283       | 577.801279       | 10 |
| 6  | 517.261653         | 259.134465        | 499.251088        | 250.129182       | S    | <b>1071.558169</b> | <b>536.282723</b> | 1054.531620 | 527.769448       | 1053.547604       | 527.277440       | 9  |
| 7  | 646.304246         | 323.655761        | 628.293681        | 314.650479       | E    | <b>984.526141</b>  | 492.766709        | 967.499592  | 484.253434       | 966.515576        | 483.761426       | 8  |
| 8  | 793.372660         | 397.189968        | 775.362095        | 388.184686       | F    | <b>855.483548</b>  | 428.245412        | 838.456999  | 419.732138       | <b>837.472983</b> | 419.240130       | 7  |
| 9  | <b>930.431572</b>  | 465.719424        | 912.421007        | 456.714141       | H    | <b>708.415134</b>  | 354.711205        | 691.388585  | 346.197931       | 690.404569        | 345.705923       | 6  |
| 10 | <b>1043.515636</b> | 522.261456        | 1025.505071       | 513.256173       | L    | <b>571.356222</b>  | 286.181749        | 554.329673  | 277.668475       | 553.345657        | 277.176467       | 5  |
| 11 | <b>1142.584050</b> | <b>571.795663</b> | 1124.573485       | 562.790380       | V    | <b>458.272158</b>  | 229.639717        | 441.245609  | 221.126443       | 440.261593        | 220.634435       | 4  |
| 12 | <b>1239.636814</b> | 620.322045        | 1221.626249       | 611.316762       | P    | <b>359.203744</b>  | 180.105510        | 342.177195  | 171.592236       | <b>341.193179</b> | 171.100228       | 3  |
| 13 | <b>1326.668842</b> | 663.838059        | 1308.658277       | 654.832777       | S    | 262.150980         | 131.579128        | 245.124431  | 123.065854       | 244.140415        | 122.573846       | 2  |
| 14 |                    |                   |                   |                  | R    | 175.118952         | 88.063114         | 158.092403  | 79.549839        |                   |                  | 1  |

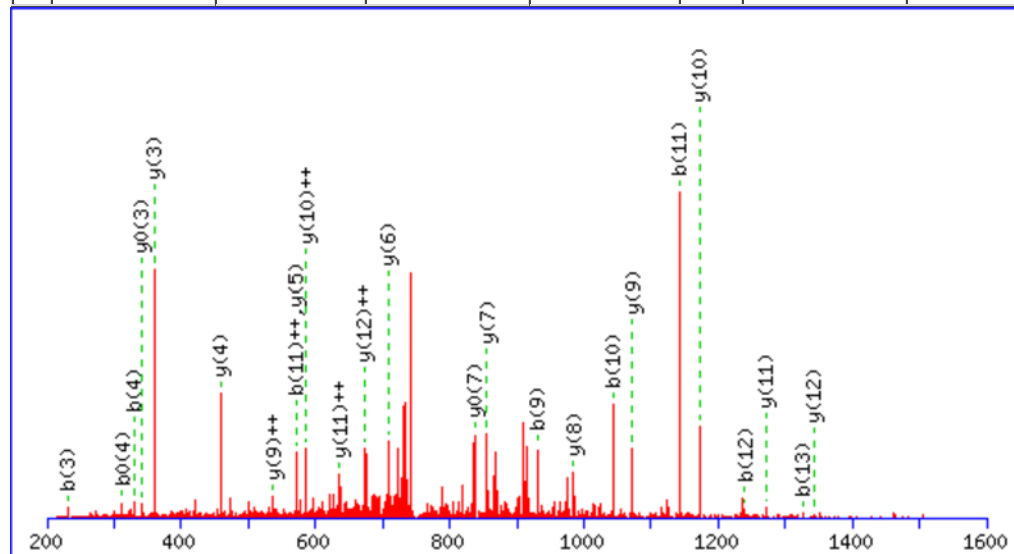

## Peptide View

MS/MS Fragmentation of **IIPSTFPQEGQPLILTCESK**

Found in **IP100293836**, Tax\_Id=9606 Gene\_Symbol=CADM2 Isoform 3 of Cell adhesion molecule 2

**Experiment:** 04 - S\_B-1 **Fraction:** S\_B-1

Match to Query 15119: 2354.213448 from(1178.114000,2+)

Title: OECHL100310\_15.18131.18131.2.dta

Data file \\BOROMIR\Masse\Data LTQ-Orbitrap\Chrystelle Lacroix\Etude clinique sJPU\OECHL100310\_15.raw

**Monoisotopic mass of neutral peptide Mr(calc):** 2354.219177 **Fixed modifications:** Carbamidomethyl (C) (apply to specified residues or termini only) **Ions Score:** 59

**Expect:** 0.00016 **Matches :** 31/216 fragment ions using 51 most intense peaks ([help](#))

| #  | <b>b</b>           | <b>b<sup>++</sup></b> | <b>b<sup>*</sup></b> | <b>b<sup>*++</sup></b> | <b>b<sup>0</sup></b> | <b>b<sup>0++</sup></b> | Seq.     | <b>y</b>           | <b>y<sup>++</sup></b> | <b>y<sup>*</sup></b> | <b>y<sup>*++</sup></b> | <b>y<sup>0</sup></b> | <b>y<sup>0++</sup></b> |
|----|--------------------|-----------------------|----------------------|------------------------|----------------------|------------------------|----------|--------------------|-----------------------|----------------------|------------------------|----------------------|------------------------|
| 1  | 114.091340         | 57.549308             |                      |                        |                      |                        | <b>I</b> |                    |                       |                      |                        |                      |                        |
| 2  | 227.175404         | 114.091340            |                      |                        |                      |                        | <b>I</b> | 2242.142399        | 1121.574837           | 2225.115850          | 1113.061563            | 2224.131834          | 1112.5695              |
| 3  | 324.228168         | 162.617722            |                      |                        |                      |                        | <b>P</b> | 2129.058335        | <b>1065.032805</b>    | 2112.031786          | 1056.519531            | 2111.047770          | 1056.0275              |
| 4  | 411.260196         | 206.133736            |                      |                        | 393.249631           | 197.128454             | <b>S</b> | 2032.005571        | 1016.506423           | 2014.979022          | 1007.993149            | 2013.995006          | 1007.5011              |
| 5  | 512.307875         | 256.657576            |                      |                        | <b>494.297310</b>    | 247.652293             | <b>T</b> | <b>1944.973543</b> | <b>972.990409</b>     | 1927.946994          | <b>964.477135</b>      | 1926.962978          | <b>963.9851</b>        |
| 6  | 609.360639         | 305.183958            |                      |                        | 591.350074           | 296.178675             | <b>P</b> | <b>1843.925864</b> | <b>922.466570</b>     | 1826.899315          | 913.953295             | 1825.915299          | 913.4612               |
| 7  | 756.429053         | 378.718165            |                      |                        | <b>738.418488</b>    | 369.712882             | <b>F</b> | <b>1746.873100</b> | 873.940188            | 1729.846551          | 865.426913             | 1728.862535          | 864.9349               |
| 8  | 853.481817         | 427.244547            |                      |                        | 835.471252           | 418.239264             | <b>P</b> | <b>1599.804686</b> | <b>800.405981</b>     | 1582.778137          | 791.892706             | 1581.794121          | 791.4006               |
| 9  | 981.540395         | 491.273836            | <b>964.513846</b>    | 482.760561             | 963.529830           | 482.268553             | <b>Q</b> | 1502.751922        | 751.879599            | 1485.725373          | 743.366324             | 1484.741357          | 742.8743               |
| 10 | 1110.582988        | 555.795132            | 1093.556439          | <b>547.281858</b>      | 1092.572423          | 546.789850             | <b>E</b> | <b>1374.693344</b> | 687.850310            | 1357.666795          | 679.337035             | 1356.682779          | 678.8450               |
| 11 | 1167.604452        | 584.305864            | 1150.577903          | 575.792590             | 1149.593887          | 575.300582             | <b>G</b> | <b>1245.650751</b> | 623.329013            | 1228.624202          | 614.815739             | 1227.640186          | 614.3237               |
| 12 | <b>1295.663030</b> | 648.335153            | 1278.636481          | 639.821879             | 1277.652465          | 639.329870             | <b>Q</b> | 1188.629287        | 594.818281            | 1171.602738          | 586.305007             | 1170.618722          | 585.8129               |
| 13 | <b>1392.715794</b> | 696.861535            | 1375.689245          | 688.348261             | <b>1374.705229</b>   | 687.856252             | <b>P</b> | <b>1060.570709</b> | 530.788992            | 1043.544160          | 522.275718             | 1042.560144          | 521.7837               |
| 14 | <b>1505.799858</b> | 753.403567            | 1488.773309          | 744.890292             | 1487.789293          | 744.398284             | <b>L</b> | 963.517945         | 482.262610            | 946.491396           | 473.749336             | 945.507380           | 473.2573               |
| 15 | <b>1618.883922</b> | 809.945599            | 1601.857373          | 801.432324             | <b>1600.873357</b>   | <b>800.940316</b>      | <b>I</b> | <b>850.433881</b>  | 425.720578            | 833.407332           | 417.207304             | 832.423316           | 416.7152               |
| 16 | <b>1731.967986</b> | 866.487631            | 1714.941437          | 857.974356             | 1713.957421          | 857.482348             | <b>L</b> | <b>737.349817</b>  | 369.178547            | <b>720.323268</b>    | 360.665272             | 719.339252           | 360.1732               |
| 17 | <b>1833.015665</b> | 917.011470            | 1815.989116          | 908.498196             | 1815.005100          | 908.006188             | <b>T</b> | <b>624.265753</b>  | 312.636515            | 607.239204           | 304.123240             | 606.255188           | 303.6312               |
| 18 | 1993.046314        | 997.026795            | 1976.019765          | 988.513520             | 1975.035749          | 988.021512             | <b>C</b> | 523.218074         | 262.112675            | 506.191525           | 253.599401             | 505.207509           | 253.1073               |
| 19 | 2122.088907        | 1061.548091           | 2105.062358          | 1053.034817            | 2104.078342          | 1052.542809            | <b>E</b> | <b>363.187425</b>  | 182.097350            | 346.160876           | 173.584076             | 345.176860           | 173.0920               |

|    |             |             |             |             |             |             |   |            |            |            |            |            |          |
|----|-------------|-------------|-------------|-------------|-------------|-------------|---|------------|------------|------------|------------|------------|----------|
| 20 | 2209.120935 | 1105.064105 | 2192.094386 | 1096.550831 | 2191.110370 | 1096.058823 | S | 234.144832 | 117.576054 | 217.118283 | 109.062780 | 216.134267 | 108.5707 |
| 21 |             |             |             |             |             |             | K | 147.112804 | 74.060040  | 130.086255 | 65.546765  |            |          |

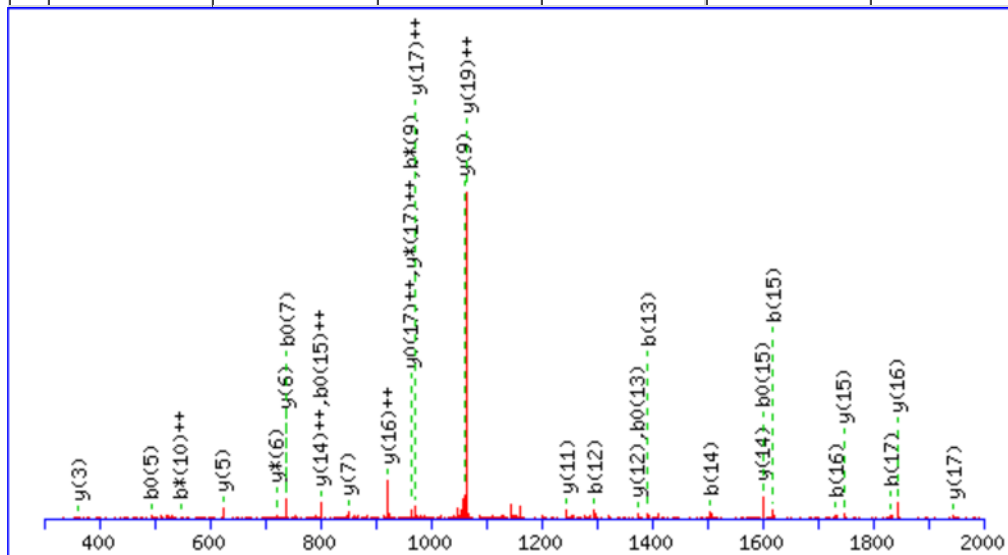

## Peptide View

MS/MS Fragmentation of **CQCPAGAALQADGR**

Found in **IP100010737**, Tax\_Id=9606 Gene\_Symbol=THBD Thrombomodulin

**Experiment:** 04 - S\_B-1 **Fraction:** S\_B-1

Match to Query 8570: 1473.645448 from(737.830000,2+)

Title: OECHL100310\_15.7378.7378.2.dta

Data file \\BOROMIR\Masse\Data LTQ-Orbitrap\Chrystelle Lacroix\Etude clinique sJPU\OECHL100310\_15.raw

**Monoisotopic mass of neutral peptide Mr(calc):** 1473.645279 **Fixed modifications:** Carbamidomethyl (C) (apply to specified residues or termini only) **Ions Score:** 55

**Expect:** 0.00015 **Matches :** 21/128 fragment ions using 39 most intense peaks ([help](#))

| # | b                 | b <sup>++</sup> | b <sup>*</sup> | b <sup>*++</sup> | b <sup>0</sup> | b <sup>0++</sup> | Seq. | y                  | y <sup>++</sup>   | y <sup>*</sup> | y <sup>*++</sup> | y <sup>0</sup> | y <sup>0++</sup> | #  |
|---|-------------------|-----------------|----------------|------------------|----------------|------------------|------|--------------------|-------------------|----------------|------------------|----------------|------------------|----|
| 1 | 161.037925        | 81.022600       |                |                  |                |                  | C    |                    |                   |                |                  |                |                  | 14 |
| 2 | <b>289.096503</b> | 145.051890      | 272.069954     | 136.538615       |                |                  | Q    | 1314.621912        | 657.814594        | 1297.595363    | 649.301320       | 1296.611347    | 648.809312       | 13 |
| 3 | <b>449.127152</b> | 225.067214      | 432.100603     | 216.553940       |                |                  | C    | <b>1186.563334</b> | <b>593.785305</b> | 1169.536785    | 585.272031       | 1168.552769    | 584.780023       | 12 |
| 4 | <b>546.179916</b> | 273.593596      | 529.153367     | 265.080322       |                |                  | P    | <b>1026.532685</b> | <b>513.769981</b> | 1009.506136    | 505.256706       | 1008.522120    | 504.764698       | 11 |

|    |                    |            |                    |            |             |            |   |                   |            |            |            |            |            |           |
|----|--------------------|------------|--------------------|------------|-------------|------------|---|-------------------|------------|------------|------------|------------|------------|-----------|
| 5  | <b>617.217030</b>  | 309.112153 | 600.190481         | 300.598879 |             |            | A | <b>929.479921</b> | 465.243599 | 912.453372 | 456.730324 | 911.469356 | 456.238316 | <b>10</b> |
| 6  | 674.238494         | 337.622885 | 657.211945         | 329.109611 |             |            | G | <b>858.442807</b> | 429.725042 | 841.416258 | 421.211767 | 840.432242 | 420.719759 | <b>9</b>  |
| 7  | 745.275608         | 373.141442 | <b>728.249059</b>  | 364.628168 |             |            | A | 801.421343        | 401.214310 | 784.394794 | 392.701035 | 783.410778 | 392.209027 | <b>8</b>  |
| 8  | <b>816.312722</b>  | 408.659999 | 799.286173         | 400.146725 |             |            | A | 730.384229        | 365.695753 | 713.357680 | 357.182478 | 712.373664 | 356.690470 | <b>7</b>  |
| 9  | <b>929.396786</b>  | 465.202031 | 912.370237         | 456.688757 |             |            | L | <b>659.347115</b> | 330.177196 | 642.320566 | 321.663921 | 641.336550 | 321.171913 | <b>6</b>  |
| 10 | <b>1057.455364</b> | 529.231320 | 1040.428815        | 520.718046 |             |            | Q | <b>546.263051</b> | 273.635164 | 529.236502 | 265.121889 | 528.252486 | 264.629881 | <b>5</b>  |
| 11 | <b>1128.492478</b> | 564.749877 | 1111.465929        | 556.236603 |             |            | A | <b>418.204473</b> | 209.605874 | 401.177924 | 201.092600 | 400.193908 | 200.600592 | <b>4</b>  |
| 12 | <b>1243.519421</b> | 622.263349 | <b>1226.492872</b> | 613.750074 | 1225.508856 | 613.258066 | D | 347.167359        | 174.087317 | 330.140810 | 165.574043 | 329.156794 | 165.082035 | <b>3</b>  |
| 13 | 1300.540885        | 650.774081 | 1283.514336        | 642.260806 | 1282.530320 | 641.768798 | G | <b>232.140416</b> | 116.573846 | 215.113867 | 108.060571 |            |            | <b>2</b>  |
| 14 |                    |            |                    |            |             |            | R | 175.118952        | 88.063114  | 158.092403 | 79.549839  |            |            | <b>1</b>  |

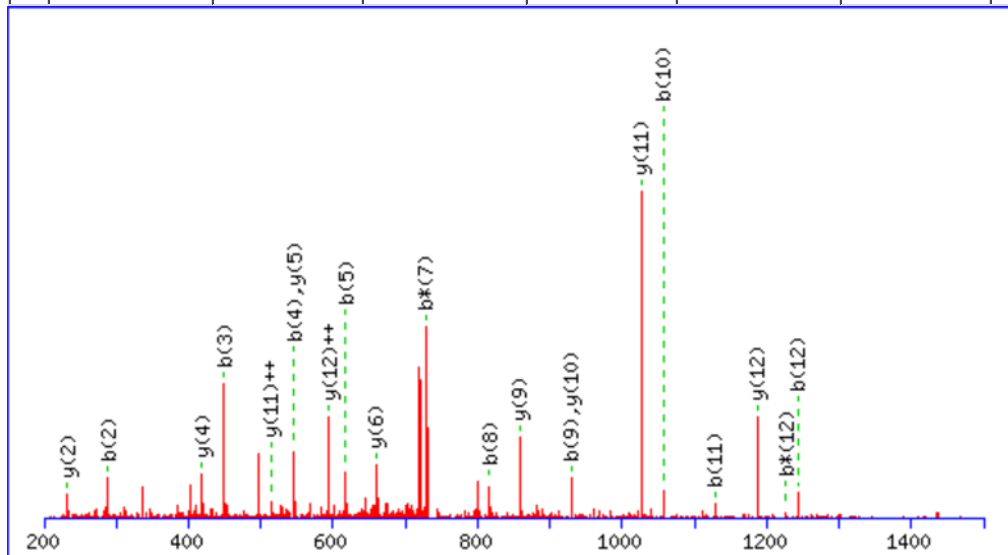

## Peptide View

MS/MS Fragmentation of **GLAEAAGPR**

Found in **IP100290826**, Tax\_Id=9606 Gene\_Symbol=FAM174A Membrane protein FAM174A

Experiment: 04 - S\_B-1 Fraction: S\_B-1

Match to Query 1156: 840.445448 from(421.230000,2+)

Title: OECHL100310\_15.4353.4353.2.dta

Data file \\BOROMIR\Masse\Data LTQ-Orbitrap\Chrystelle Lacroix\Etude clinique sJPU\OECHL100310\_15.raw

**Monoisotopic mass of neutral peptide Mr(calc):** 840.445343**Fixed modifications:** Carbamidomethyl (C) (apply to specified residues or termini only)**Ions Score:** 51**Expect:** 0.00056**Matches :** 10/64 fragment ions using 14 most intense peaks ([help](#))

| # | b          | b <sup>++</sup> | b <sup>0</sup> | b <sup>0++</sup> | Seq. | y          | y <sup>++</sup> | y*         | y* <sup>++</sup> | y <sup>0</sup> | y <sup>0++</sup> | # |
|---|------------|-----------------|----------------|------------------|------|------------|-----------------|------------|------------------|----------------|------------------|---|
| 1 | 58.028740  | 29.518008       |                |                  | G    |            |                 |            |                  |                |                  | 9 |
| 2 | 171.112804 | 86.060040       |                |                  | L    | 784.431179 | 392.719228      | 767.404630 | 384.205953       | 766.420614     | 383.713945       | 8 |
| 3 | 242.149918 | 121.578597      |                |                  | A    | 671.347115 | 336.177196      | 654.320566 | 327.663921       | 653.336550     | 327.171913       | 7 |
| 4 | 371.192511 | 186.099894      | 353.181946     | 177.094611       | E    | 600.310001 | 300.658639      | 583.283452 | 292.145364       | 582.299436     | 291.653356       | 6 |
| 5 | 442.229625 | 221.618450      | 424.219060     | 212.613168       | A    | 471.267408 | 236.137342      | 454.240859 | 227.624067       |                |                  | 5 |
| 6 | 513.266739 | 257.137008      | 495.256174     | 248.131725       | A    | 400.230294 | 200.618785      | 383.203745 | 192.105510       |                |                  | 4 |
| 7 | 570.288203 | 285.647740      | 552.277638     | 276.642457       | G    | 329.193180 | 165.100228      | 312.166631 | 156.586953       |                |                  | 3 |
| 8 | 667.340967 | 334.174122      | 649.330402     | 325.168839       | P    | 272.171716 | 136.589496      | 255.145167 | 128.076221       |                |                  | 2 |
| 9 |            |                 |                |                  | R    | 175.118952 | 88.063114       | 158.092403 | 79.549839        |                |                  | 1 |

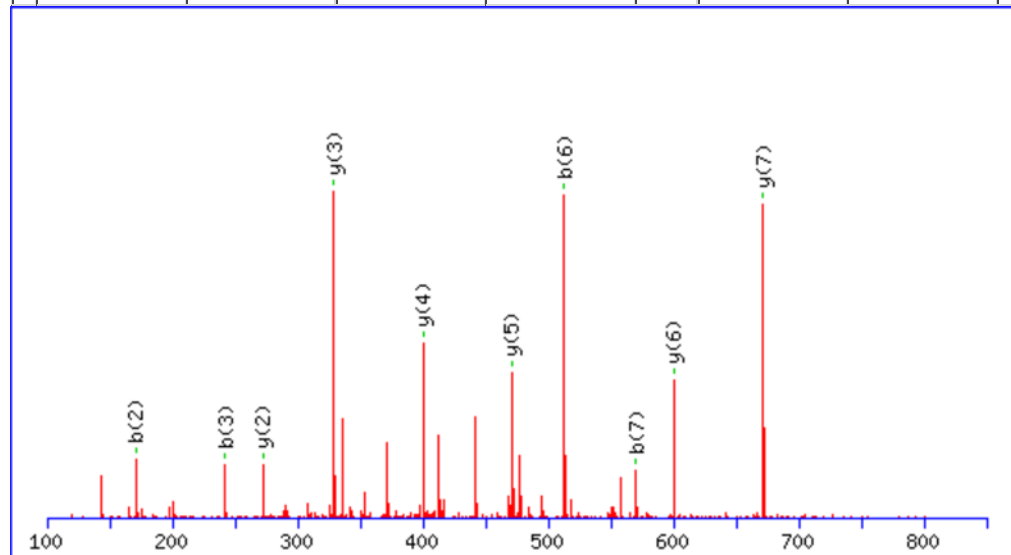

## Peptide View

MS/MS Fragmentation of **NPVLQQDAHSSVTITPQR**

Found in **IP100410488**, Tax\_Id=9606 Gene\_Symbol=CD276 Isoform 1 of CD276 antigen

**Experiment:** 26 - NOPD2 **Fraction:** NOPD2

Match to Query 14613: 1990.024248 from(996.019400,2+)

Title: OECHL100312\_22.9987.9987.2.dta

Data file \\Boromir\masse\Data LTQ-Orbitrap\Chrystelle Lacroix\Etude clinique sJPU\OECHL100312\_22.raw

**Monoisotopic mass of neutral peptide Mr(calc):** 1990.023209**Fixed modifications:** Carbamidomethyl (C) (apply to specified residues or termini only)**Ions Score:** 69

**Expect:** 1.7e-005**Matches :** 61/186 fragment ions using 128 most intense peaks ([help](#))

| #  | b                  | b <sup>++</sup>   | b*                 | b* <sup>++</sup>  | b <sup>0</sup>     | b <sup>0++</sup>  | Seq. | y                  | y <sup>++</sup>   | y*                 | y* <sup>++</sup>  | y <sup>0</sup>     | y <sup>0++</sup>  | #  |
|----|--------------------|-------------------|--------------------|-------------------|--------------------|-------------------|------|--------------------|-------------------|--------------------|-------------------|--------------------|-------------------|----|
| 1  | 115.050203         | 58.028740         | 98.023654          | 49.515465         |                    |                   | N    |                    |                   |                    |                   |                    |                   | 18 |
| 2  | 212.102967         | 106.555121        | 195.076418         | 98.041847         |                    |                   | P    | 1876.987553        | 938.997415        | 1859.961004        | 930.484140        | 1858.976988        | 929.992132        | 17 |
| 3  | <b>311.171381</b>  | 156.089328        | <b>294.144832</b>  | 147.576054        |                    |                   | V    | 1779.934789        | <b>890.471033</b> | 1762.908240        | 881.957758        | 1761.924224        | 881.465750        | 16 |
| 4  | <b>424.255445</b>  | 212.631361        | 407.228896         | 204.118086        |                    |                   | L    | <b>1680.866375</b> | <b>840.936826</b> | <b>1663.839826</b> | <b>832.423551</b> | 1662.855810        | 831.931543        | 15 |
| 5  | <b>552.314023</b>  | 276.660650        | <b>535.287474</b>  | 268.147375        |                    |                   | Q    | <b>1567.782311</b> | <b>784.394794</b> | <b>1550.755762</b> | <b>775.881519</b> | 1549.771746        | <b>775.389511</b> | 14 |
| 6  | <b>680.372601</b>  | 340.689939        | <b>663.346052</b>  | 332.176664        |                    |                   | Q    | <b>1439.723733</b> | 720.365505        | 1422.697184        | <b>711.852230</b> | 1421.713168        | 711.360222        | 13 |
| 7  | <b>795.399544</b>  | 398.203410        | <b>778.372995</b>  | 389.690136        | 777.388979         | 389.198128        | D    | <b>1311.665155</b> | 656.336215        | <b>1294.638606</b> | 647.822941        | 1293.654590        | 647.330933        | 12 |
| 8  | <b>866.436658</b>  | 433.721967        | 849.410109         | <b>425.208693</b> | 848.426093         | <b>424.716685</b> | A    | <b>1196.638212</b> | 598.822744        | 1179.611663        | 590.309470        | <b>1178.627647</b> | 589.817462        | 11 |
| 9  | <b>1003.495570</b> | <b>502.251423</b> | 986.469021         | 493.738149        | 985.485005         | 493.246141        | H    | <b>1125.601098</b> | 563.304187        | 1108.574549        | 554.790913        | 1107.590533        | 554.298905        | 10 |
| 10 | <b>1090.527598</b> | 545.767437        | 1073.501049        | 537.254163        | 1072.517033        | 536.762155        | S    | <b>988.542186</b>  | 494.774731        | 971.515637         | 486.261457        | 970.531621         | 485.769449        | 9  |
| 11 | <b>1177.559626</b> | 589.283451        | 1160.533077        | 580.770177        | <b>1159.549061</b> | 580.278169        | S    | <b>901.510158</b>  | 451.258717        | 884.483609         | 442.745443        | 883.499593         | 442.253435        | 8  |
| 12 | <b>1276.628040</b> | 638.817658        | <b>1259.601491</b> | 630.304384        | <b>1258.617475</b> | 629.812376        | V    | <b>814.478130</b>  | 407.742703        | 797.451581         | 399.229428        | 796.467565         | 398.737420        | 7  |
| 13 | <b>1377.675719</b> | 689.341498        | 1360.649170        | <b>680.828223</b> | <b>1359.665154</b> | <b>680.336215</b> | T    | <b>715.409716</b>  | 358.208496        | <b>698.383167</b>  | 349.695221        | 697.399151         | 349.203213        | 6  |
| 14 | <b>1490.759783</b> | 745.883530        | <b>1473.733234</b> | 737.370255        | <b>1472.749218</b> | 736.878247        | I    | <b>614.362037</b>  | 307.684656        | 597.335488         | 299.171382        | <b>596.351472</b>  | 298.679374        | 5  |
| 15 | <b>1591.807462</b> | 796.407369        | <b>1574.780913</b> | 787.894095        | <b>1573.796897</b> | 787.402087        | T    | <b>501.277973</b>  | 251.142624        | 484.251424         | 242.629350        | 483.267408         | 242.137342        | 4  |
| 16 | 1688.860226        | 844.933751        | <b>1671.833677</b> | 836.420477        | 1670.849661        | 835.928469        | P    | <b>400.230294</b>  | 200.618785        | <b>383.203745</b>  | 192.105510        |                    |                   | 3  |
| 17 | <b>1816.918804</b> | 908.963040        | <b>1799.892255</b> | 900.449766        | 1798.908239        | 899.957758        | Q    | 303.177530         | 152.092403        | 286.150981         | 143.579128        |                    |                   | 2  |
| 18 |                    |                   |                    |                   |                    |                   | R    | 175.118952         | 88.063114         | 158.092403         | 79.549839         |                    |                   | 1  |



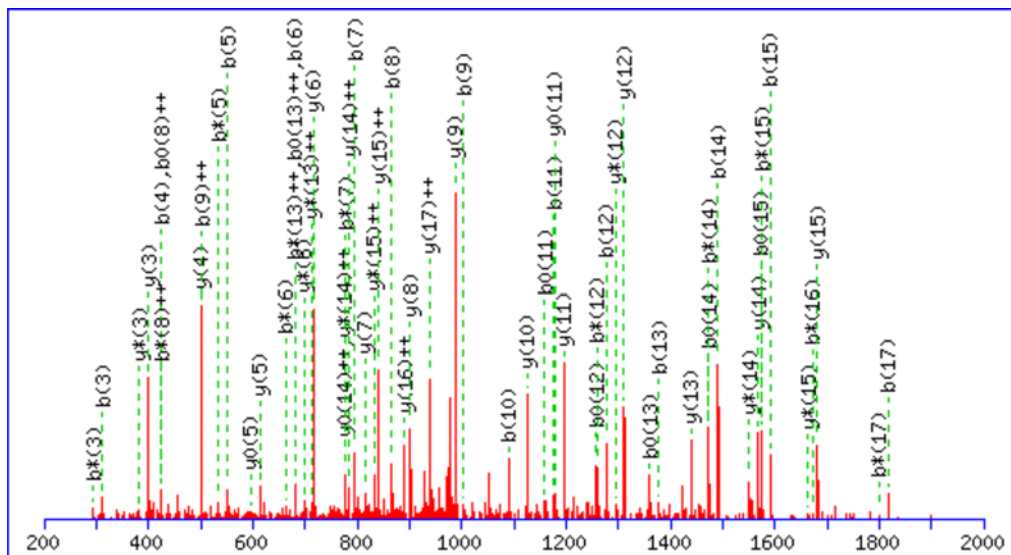

## Peptide View

MS/MS Fragmentation of **DFSLTSSSQTPGATK**

Found in **IPI00291300**, Tax\_Id=9606 Gene\_Symbol=PODXL2 Putative uncharacterized protein PODXL2

**Experiment:** 26 - NOPD2 **Fraction:** NOPD2

Match to Query 10836: 1525.726848 from(763.870700,2+)

Title: OECHL100312\_22.10965.10965.2.dta

Data file \\Boromir\masse\Data LTQ-Orbitrap\Chrystelle Lacroix\Etude clinique sJPU\OECHL100312\_22.raw

**Monoisotopic mass of neutral peptide Mr(calc):** 1525.726028 **Fixed modifications:** Carbamidomethyl (C) (apply to specified residues or termini only) **Ions Score:** 84

**Expect:** 4.8e-007 **Matches :** 37/150 fragment ions using 62 most intense peaks ([help](#))

| # | b                 | b <sup>++</sup> | b* | b <sup>*++</sup> | b <sup>0</sup>    | b <sup>0++</sup> | Seq.     | y                  | y <sup>++</sup>   | y*                | y <sup>*++</sup>  | y <sup>0</sup> | y <sup>0++</sup>  | #         |
|---|-------------------|-----------------|----|------------------|-------------------|------------------|----------|--------------------|-------------------|-------------------|-------------------|----------------|-------------------|-----------|
| 1 | 116.034219        | 58.520748       |    |                  | 98.023654         | 49.515465        | <b>D</b> |                    |                   |                   |                   |                |                   | <b>15</b> |
| 2 | <b>263.102633</b> | 132.054954      |    |                  | <b>245.092068</b> | 123.049672       | <b>F</b> | 1411.706351        | 706.356813        | 1394.679802       | 697.843539        | 1393.695786    | 697.351531        | <b>14</b> |
| 3 | <b>350.134661</b> | 175.570968      |    |                  | <b>332.124096</b> | 166.565686       | <b>S</b> | <b>1264.637937</b> | <b>632.822607</b> | 1247.611388       | 624.309332        | 1246.627372    | 623.817324        | <b>13</b> |
| 4 | 463.218725        | 232.113001      |    |                  | <b>445.208160</b> | 223.107718       | <b>L</b> | <b>1177.605909</b> | 589.306592        | 1160.579360       | 580.793318        | 1159.595344    | 580.301310        | <b>12</b> |
| 5 | <b>564.266404</b> | 282.636840      |    |                  | <b>546.255839</b> | 273.631558       | <b>T</b> | <b>1064.521845</b> | 532.764561        | 1047.495296       | 524.251286        | 1046.511280    | 523.759278        | <b>11</b> |
| 6 | 651.298432        | 326.152854      |    |                  | <b>633.287867</b> | 317.147572       | <b>S</b> | <b>963.474166</b>  | 482.240721        | <b>946.447617</b> | <b>473.727446</b> | 945.463601     | <b>473.235438</b> | <b>10</b> |

|    |             |            |             |            |             |            |   |            |            |            |            |            |            |   |
|----|-------------|------------|-------------|------------|-------------|------------|---|------------|------------|------------|------------|------------|------------|---|
| 7  | 738.330460  | 369.668868 |             |            | 720.319895  | 360.663586 | S | 876.442138 | 438.724707 | 859.415589 | 430.211432 | 858.431573 | 429.719424 | 9 |
| 8  | 825.362488  | 413.184882 |             |            | 807.351923  | 404.179599 | S | 789.410110 | 395.208693 | 772.383561 | 386.695418 | 771.399545 | 386.203410 | 8 |
| 9  | 953.421066  | 477.214171 | 936.394517  | 468.700897 | 935.410501  | 468.208889 | Q | 702.378082 | 351.692679 | 685.351533 | 343.179404 | 684.367517 | 342.687396 | 7 |
| 10 | 1054.468745 | 527.738010 | 1037.442196 | 519.224736 | 1036.458180 | 518.732728 | T | 574.319504 | 287.663390 | 557.292955 | 279.150115 | 556.308939 | 278.658107 | 6 |
| 11 | 1151.521509 | 576.264392 | 1134.494960 | 567.751118 | 1133.510944 | 567.259110 | P | 473.271825 | 237.139550 | 456.245276 | 228.626276 | 455.261260 | 228.134268 | 5 |
| 12 | 1208.542973 | 604.775124 | 1191.516424 | 596.261850 | 1190.532408 | 595.769842 | G | 376.219061 | 188.613168 | 359.192512 | 180.099894 | 358.208496 | 179.607886 | 4 |
| 13 | 1279.580087 | 640.293681 | 1262.553538 | 631.780407 | 1261.569522 | 631.288399 | A | 319.197597 | 160.102436 | 302.171048 | 151.589162 | 301.187032 | 151.097154 | 3 |
| 14 | 1380.627766 | 690.817521 | 1363.601217 | 682.304246 | 1362.617201 | 681.812238 | T | 248.160483 | 124.583879 | 231.133934 | 116.070605 | 230.149918 | 115.578597 | 2 |
| 15 |             |            |             |            |             |            | K | 147.112804 | 74.060040  | 130.086255 | 65.546765  |            |            | 1 |

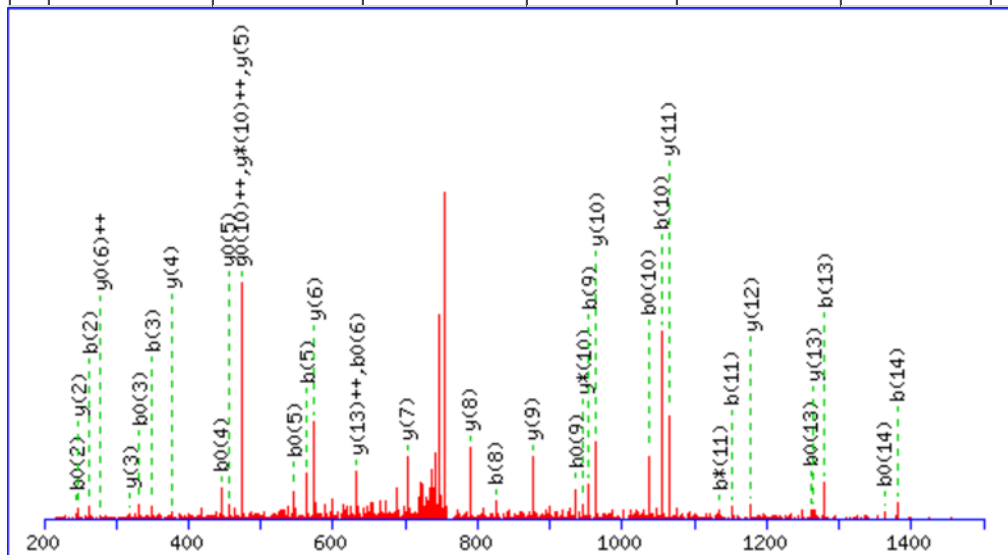

## Peptide View

MS/MS Fragmentation of **AHGQESAI FNEVAPGYFSR**

Found in **IP100170635**, Tax\_Id=9606 Gene\_Symbol=SECTM1 Secreted and transmembrane protein 1

**Experiment:** 26 - NOPD2 **Fraction:** NOPD2

Match to Query 15017: 2078.983448 from(1040.499000,2+)

Title: OECHL100312\_22.17211.17211.2.dta

Data file \\Boromir\masse\Data LTQ-Orbitrap\Chrystelle Lacroix\Etude clinique sJPU\OECHL100312\_22.raw

**Monoisotopic mass of neutral peptide Mr(calc):** 2078.980988**Fixed modifications:** Carbamidomethyl (C) (apply to specified residues or termini only)**Ions Score:** 72**Expect:** 1e-005**Matches :** 38/200 fragment ions using 84 most intense peaks ([help](#))

| #  | b           | b <sup>++</sup> | b*          | b <sup>*++</sup> | b <sup>0</sup> | b <sup>0++</sup> | Seq. | y           | y <sup>++</sup> | y*          | y <sup>*++</sup> | y <sup>0</sup> | y <sup>0++</sup> | #  |
|----|-------------|-----------------|-------------|------------------|----------------|------------------|------|-------------|-----------------|-------------|------------------|----------------|------------------|----|
| 1  | 72.044390   | 36.525833       |             |                  |                |                  | A    |             |                 |             |                  |                |                  | 19 |
| 2  | 209.103302  | 105.055289      |             |                  |                |                  | H    | 2008.951166 | 1004.979221     | 1991.924617 | 996.465947       | 1990.940601    | 995.973939       | 18 |
| 3  | 266.124766  | 133.566021      |             |                  |                |                  | G    | 1871.892254 | 936.449765      | 1854.865705 | 927.936491       | 1853.881689    | 927.444483       | 17 |
| 4  | 394.183344  | 197.595310      | 377.156795  | 189.082035       |                |                  | Q    | 1814.870790 | 907.939033      | 1797.844241 | 899.425759       | 1796.860225    | 898.933751       | 16 |
| 5  | 523.225937  | 262.116607      | 506.199388  | 253.603332       | 505.215372     | 253.111324       | E    | 1686.812212 | 843.909744      | 1669.785663 | 835.396470       | 1668.801647    | 834.904462       | 15 |
| 6  | 610.257965  | 305.632621      | 593.231416  | 297.119346       | 592.247400     | 296.627338       | S    | 1557.769619 | 779.388448      | 1540.743070 | 770.875173       | 1539.759054    | 770.383165       | 14 |
| 7  | 681.295079  | 341.151178      | 664.268530  | 332.637903       | 663.284514     | 332.145895       | A    | 1470.737591 | 735.872434      | 1453.711042 | 727.359159       | 1452.727026    | 726.867151       | 13 |
| 8  | 794.379143  | 397.693210      | 777.352594  | 389.179935       | 776.368578     | 388.687927       | I    | 1399.700477 | 700.353877      | 1382.673928 | 691.840602       | 1381.689912    | 691.348594       | 12 |
| 9  | 941.447557  | 471.227417      | 924.421008  | 462.714142       | 923.436992     | 462.222134       | F    | 1286.616413 | 643.811845      | 1269.589864 | 635.298570       | 1268.605848    | 634.806562       | 11 |
| 10 | 1055.490484 | 528.248880      | 1038.463935 | 519.735606       | 1037.479919    | 519.243597       | N    | 1139.547999 | 570.277638      | 1122.521450 | 561.764363       | 1121.537434    | 561.272355       | 10 |
| 11 | 1184.533077 | 592.770176      | 1167.506528 | 584.256902       | 1166.522512    | 583.764894       | E    | 1025.505072 | 513.256174      | 1008.478523 | 504.742900       | 1007.494507    | 504.250892       | 9  |
| 12 | 1283.601491 | 642.304383      | 1266.574942 | 633.791109       | 1265.590926    | 633.299101       | V    | 896.462479  | 448.734878      | 879.435930  | 440.221603       | 878.451914     | 439.729595       | 8  |
| 13 | 1354.638605 | 677.822940      | 1337.612056 | 669.309666       | 1336.628040    | 668.817658       | A    | 797.394065  | 399.200671      | 780.367516  | 390.687396       | 779.383500     | 390.195388       | 7  |
| 14 | 1451.691369 | 726.349322      | 1434.664820 | 717.836048       | 1433.680804    | 717.344040       | P    | 726.356951  | 363.682114      | 709.330402  | 355.168839       | 708.346386     | 354.676831       | 6  |
| 15 | 1508.712833 | 754.860054      | 1491.686284 | 746.346780       | 1490.702268    | 745.854772       | G    | 629.304187  | 315.155732      | 612.277638  | 306.642457       | 611.293622     | 306.150449       | 5  |
| 16 | 1671.776162 | 836.391719      | 1654.749613 | 827.878445       | 1653.765597    | 827.386436       | Y    | 572.282723  | 286.645000      | 555.256174  | 278.131725       | 554.272158     | 277.639717       | 4  |
| 17 | 1818.844576 | 909.925926      | 1801.818027 | 901.412652       | 1800.834011    | 900.920643       | F    | 409.219394  | 205.113335      | 392.192845  | 196.600061       | 391.208829     | 196.108053       | 3  |
| 18 | 1905.876604 | 953.441940      | 1888.850055 | 944.928666       | 1887.866039    | 944.436658       | S    | 262.150980  | 131.579128      | 245.124431  | 123.065854       | 244.140415     | 122.573846       | 2  |
| 19 |             |                 |             |                  |                |                  | R    | 175.118952  | 88.063114       | 158.092403  | 79.549840        |                |                  | 1  |

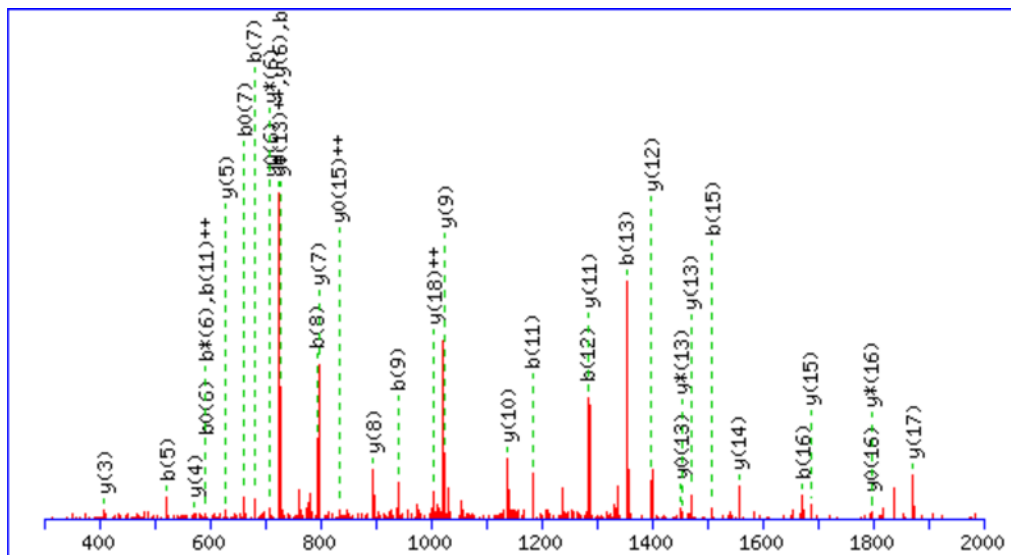

## Peptide View

MS/MS Fragmentation of **LLETECPQYIR**

Found in **IPI00007047**, Tax\_Id=9606 Gene\_Symbol=S100A8 Protein S100-A8

**Experiment:** 26 - NOPD2 **Fraction:** NOPD2

Match to Query 9650: 1420.702048 from(711.358300,2+)

Title: OECHL100312\_22.12622.12622.2.dta

Data file \\Boromir\masse\Data LTQ-Orbitrap\Chrystelle Lacroix\Etude clinique sJPU\OECHL100312\_22.raw

**Monoisotopic mass of neutral peptide Mr(calc):** 1420.702026 **Fixed modifications:** Carbamidomethyl (C) (apply to specified residues or termini only) **Ions Score:** 61

**Expect:** 9.3e-005 **Matches :** 10/90 fragment ions using 12 most intense peaks ([help](#))

| # | b                 | b <sup>++</sup> | b <sup>*</sup> | b <sup>*++</sup> | b <sup>0</sup> | b <sup>0++</sup> | Seq. | y                  | y <sup>++</sup>   | y <sup>*</sup> | y <sup>*++</sup> | y <sup>0</sup> | y <sup>0++</sup> | #  |
|---|-------------------|-----------------|----------------|------------------|----------------|------------------|------|--------------------|-------------------|----------------|------------------|----------------|------------------|----|
| 1 | 114.091340        | 57.549308       |                |                  |                |                  | L    |                    |                   |                |                  |                |                  | 11 |
| 2 | 227.175404        | 114.091340      |                |                  |                |                  | L    | 1308.625265        | 654.816271        | 1291.598716    | 646.302996       | 1290.614700    | 645.810988       | 10 |
| 3 | <b>356.217997</b> | 178.612637      |                |                  | 338.207432     | 169.607354       | E    | <b>1195.541201</b> | <b>598.274239</b> | 1178.514652    | 589.760964       | 1177.530636    | 589.268956       | 9  |
| 4 | 457.265676        | 229.136476      |                |                  | 439.255111     | 220.131194       | T    | <b>1066.498608</b> | 533.752942        | 1049.472059    | 525.239668       | 1048.488043    | 524.747660       | 8  |
| 5 | 586.308269        | 293.657773      |                |                  | 568.297704     | 284.652490       | E    | <b>965.450929</b>  | 483.229103        | 948.424380     | 474.715828       | 947.440364     | 474.223820       | 7  |
| 6 | 746.338918        | 373.673097      |                |                  | 728.328353     | 364.667815       | C    | <b>836.408336</b>  | 418.707806        | 819.381787     | 410.194531       |                |                  | 6  |

|    |             |            |             |            |             |            |   |            |            |            |            |  |  |   |
|----|-------------|------------|-------------|------------|-------------|------------|---|------------|------------|------------|------------|--|--|---|
| 7  | 843.391682  | 422.199479 |             |            | 825.381117  | 413.194197 | P | 676.377687 | 338.692481 | 659.351138 | 330.179207 |  |  | 5 |
| 8  | 971.450260  | 486.228768 | 954.423711  | 477.715494 | 953.439695  | 477.223486 | Q | 579.324923 | 290.166099 | 562.298374 | 281.652825 |  |  | 4 |
| 9  | 1134.513589 | 567.760433 | 1117.487040 | 559.247158 | 1116.503024 | 558.755150 | Y | 451.266345 | 226.136810 | 434.239796 | 217.623536 |  |  | 3 |
| 10 | 1247.597653 | 624.302465 | 1230.571104 | 615.789190 | 1229.587088 | 615.297182 | I | 288.203016 | 144.605146 | 271.176467 | 136.091871 |  |  | 2 |
| 11 |             |            |             |            |             |            | R | 175.118952 | 88.063114  | 158.092403 | 79.549839  |  |  | 1 |

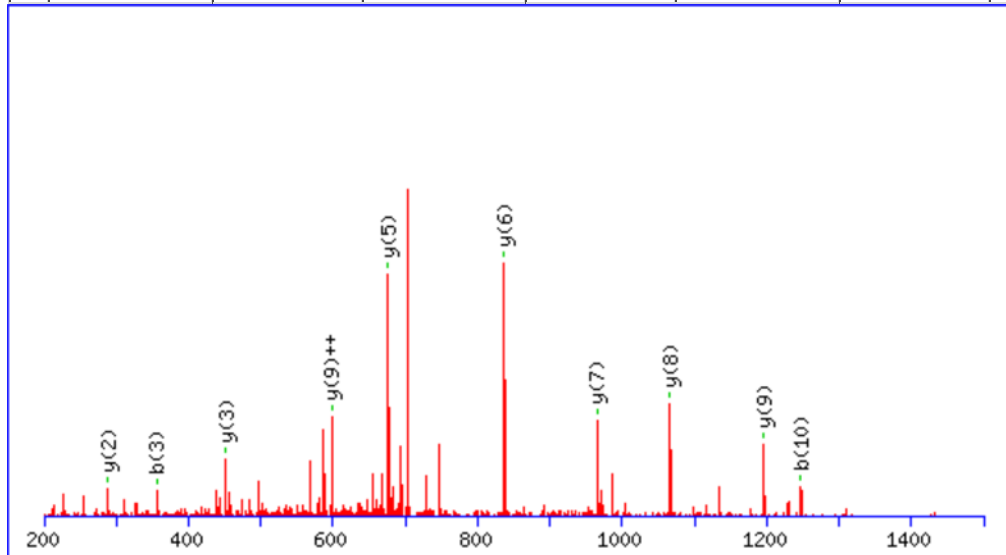

## Peptide View

MS/MS Fragmentation of **HSFKGEECPAGSHR**

Found in **IPI00021970**, Tax\_Id=9606 Gene\_Symbol=MGC31957;TNFRSF10C TNFRSF10C protein

Experiment: 26 - NOPD2 Fraction: NOPD2

Match to Query 11608: 1597.705648 from(799.860100,2+)

Title: OECHL100312\_22.2375.2375.2.dta

Data file \\Boromir\masse\Data LTQ-Orbitrap\Chrystelle Lacroix\Etude clinique sJPU\OECHL100312\_22.raw

**Monoisotopic mass of neutral peptide Mr(calc):** 1597.705566**Fixed modifications:** Carbamidomethyl (C) (apply to specified residues or termini only)**Ions Score:** 64

**Expect:** 2.5e-005**Matches :** 30/144 fragment ions using 55 most intense peaks ([help](#))

| # | b          | b <sup>++</sup> | b* | b <sup>*++</sup> | b <sup>0</sup> | b <sup>0++</sup> | Seq. | y | y <sup>++</sup> | y* | y <sup>*++</sup> | y <sup>0</sup> | y <sup>0++</sup> | #  |
|---|------------|-----------------|----|------------------|----------------|------------------|------|---|-----------------|----|------------------|----------------|------------------|----|
| 1 | 138.066188 | 69.536732       |    |                  |                |                  | H    |   |                 |    |                  |                |                  | 14 |

|    |                    |            |                    |            |                    |            |   |                    |                   |             |            |             |            |           |
|----|--------------------|------------|--------------------|------------|--------------------|------------|---|--------------------|-------------------|-------------|------------|-------------|------------|-----------|
| 2  | <b>225.098216</b>  | 113.052746 |                    |            | 207.087651         | 104.047463 | S | <b>1461.653938</b> | <b>731.330607</b> | 1444.627389 | 722.817333 | 1443.643373 | 722.325325 | <b>13</b> |
| 3  | <b>372.166630</b>  | 186.586953 |                    |            | <b>354.156065</b>  | 177.581671 | F | <b>1374.621910</b> | <b>687.814593</b> | 1357.595361 | 679.301319 | 1356.611345 | 678.809311 | <b>12</b> |
| 4  | <b>500.261593</b>  | 250.634435 | 483.235044         | 242.121160 | <b>482.251028</b>  | 241.629152 | K | <b>1227.553496</b> | <b>614.280386</b> | 1210.526947 | 605.767112 | 1209.542931 | 605.275104 | <b>11</b> |
| 5  | <b>557.283057</b>  | 279.145167 | 540.256508         | 270.631892 | <b>539.272492</b>  | 270.139884 | G | <b>1099.458533</b> | 550.232905        | 1082.431984 | 541.719630 | 1081.447968 | 541.227622 | <b>10</b> |
| 6  | <b>686.325650</b>  | 343.666463 | 669.299101         | 335.153189 | 668.315085         | 334.661181 | E | 1042.437069        | 521.722173        | 1025.410520 | 513.208898 | 1024.426504 | 512.716890 | <b>9</b>  |
| 7  | 815.368243         | 408.187760 | 798.341694         | 399.674485 | 797.357678         | 399.182477 | E | <b>913.394476</b>  | 457.200876        | 896.367927  | 448.687602 | 895.383911  | 448.195594 | <b>8</b>  |
| 8  | <b>975.398892</b>  | 488.203084 | 958.372343         | 479.689810 | 957.388327         | 479.197802 | C | <b>784.351883</b>  | 392.679580        | 767.325334  | 384.166305 | 766.341318  | 383.674297 | <b>7</b>  |
| 9  | 1072.451656        | 536.729466 | 1055.425107        | 528.216192 | 1054.441091        | 527.724184 | P | <b>624.321234</b>  | <b>312.664255</b> | 607.294685  | 304.150981 | 606.310669  | 303.658973 | <b>6</b>  |
| 10 | <b>1143.488770</b> | 572.248023 | 1126.462221        | 563.734749 | 1125.478205        | 563.242741 | A | 527.268470         | 264.137873        | 510.241921  | 255.624598 | 509.257905  | 255.132590 | <b>5</b>  |
| 11 | <b>1200.510234</b> | 600.758755 | 1183.483685        | 592.245481 | <b>1182.499669</b> | 591.753473 | G | <b>456.231356</b>  | 228.619316        | 439.204807  | 220.106041 | 438.220791  | 219.614033 | <b>4</b>  |
| 12 | <b>1287.542262</b> | 644.274769 | 1270.515713        | 635.761495 | <b>1269.531697</b> | 635.269487 | S | 399.209892         | 200.108584        | 382.183343  | 191.595309 | 381.199327  | 191.103301 | <b>3</b>  |
| 13 | <b>1424.601174</b> | 712.804225 | <b>1407.574625</b> | 704.290951 | <b>1406.590609</b> | 703.798943 | H | <b>312.177864</b>  | 156.592570        | 295.151315  | 148.079295 |             |            | <b>2</b>  |
| 14 |                    |            |                    |            |                    |            | R | 175.118952         | 88.063114         | 158.092403  | 79.549839  |             |            | <b>1</b>  |

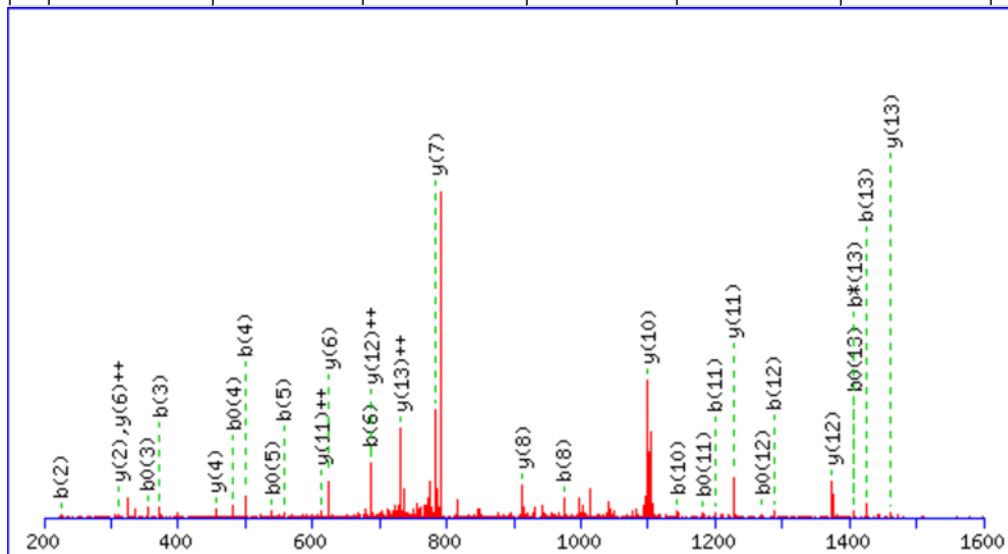

## Peptide View

MS/MS Fragmentation of **EVQLVESGGGLVKGGSRLR**

Found in **IPI00783024**, Tax\_Id=9606 Gene\_Symbol=- Myosin-reactive immunoglobulin heavy chain variable region (Fragment)

**Experiment:** 26 - NOPD2 **Fraction:** NOPD2

Match to Query 14016: 1881.032648 from(941.523600,2+)

Title: OECHL100312\_22.14159.14159.2.dta

Data file \\Boromir\masse\Data LTQ-Orbitrap\Chrystelle Lacroix\Etude clinique sJPU\OECHL100312\_22.raw

**Monoisotopic mass of neutral peptide Mr(calc):** 1881.031982**Fixed modifications:** Carbamidomethyl (C) (apply to specified residues or termini only)**Ions Score:** 76

**Expect:** 1.3e-006**Matches :** 20/208 fragment ions using 30 most intense peaks ([help](#))

| #  | b                  | b <sup>++</sup> | b*          | b <sup>*++</sup> | b <sup>0</sup>    | b <sup>0++</sup> | Seq. | y                  | y <sup>++</sup>   | y*                 | y <sup>*++</sup> | y <sup>0</sup>    | y <sup>0++</sup> | #  |
|----|--------------------|-----------------|-------------|------------------|-------------------|------------------|------|--------------------|-------------------|--------------------|------------------|-------------------|------------------|----|
| 1  | 130.049869         | 65.528572       |             |                  | 112.039304        | 56.523290        | E    |                    |                   |                    |                  |                   |                  | 19 |
| 2  | 229.118283         | 115.062780      |             |                  | 211.107718        | 106.057497       | V    | 1752.996660        | 877.001968        | 1735.970111        | 868.488694       | 1734.986095       | 867.996686       | 18 |
| 3  | <b>357.176861</b>  | 179.092069      | 340.150312  | 170.578794       | <b>339.166296</b> | 170.086786       | Q    | <b>1653.928246</b> | <b>827.467761</b> | <b>1636.901697</b> | 818.954487       | 1635.917681       | 818.462479       | 17 |
| 4  | 470.260925         | 235.634101      | 453.234376  | 227.120826       | <b>452.250360</b> | 226.628818       | L    | <b>1525.869668</b> | 763.438472        | 1508.843119        | 754.925198       | 1507.859103       | 754.433190       | 16 |
| 5  | 569.329339         | 285.168308      | 552.302790  | 276.655033       | 551.318774        | 276.163025       | V    | <b>1412.785604</b> | 706.896440        | 1395.759055        | 698.383166       | 1394.775039       | 697.891158       | 15 |
| 6  | 698.371932         | 349.689604      | 681.345383  | 341.176330       | 680.361367        | 340.684322       | E    | <b>1313.717190</b> | 657.362233        | 1296.690641        | 648.848959       | 1295.706625       | 648.356951       | 14 |
| 7  | 785.403960         | 393.205618      | 768.377411  | 384.692344       | 767.393395        | 384.200336       | S    | <b>1184.674597</b> | 592.840937        | 1167.648048        | 584.327662       | 1166.664032       | 583.835654       | 13 |
| 8  | 842.425424         | 421.716350      | 825.398875  | 413.203076       | 824.414859        | 412.711068       | G    | <b>1097.642569</b> | 549.324923        | 1080.616020        | 540.811648       | 1079.632004       | 540.319640       | 12 |
| 9  | 899.446888         | 450.227082      | 882.420339  | 441.713808       | 881.436323        | 441.221800       | G    | <b>1040.621105</b> | 520.814191        | 1023.594556        | 512.300916       | 1022.610540       | 511.808908       | 11 |
| 10 | 956.468352         | 478.737814      | 939.441803  | 470.224540       | 938.457787        | 469.732532       | G    | <b>983.599641</b>  | 492.303459        | 966.573092         | 483.790184       | 965.589076        | 483.298176       | 10 |
| 11 | 1069.552416        | 535.279846      | 1052.525867 | 526.766572       | 1051.541851       | 526.274564       | L    | 926.578177         | 463.792727        | 909.551628         | 455.279452       | 908.567612        | 454.787444       | 9  |
| 12 | 1168.620830        | 584.814053      | 1151.594281 | 576.300779       | 1150.610265       | 575.808771       | V    | <b>813.494113</b>  | 407.250695        | 796.467564         | 398.737420       | 795.483548        | 398.245412       | 8  |
| 13 | 1296.715793        | 648.861535      | 1279.689244 | 640.348260       | 1278.705228       | 639.856252       | K    | <b>714.425699</b>  | <b>357.716487</b> | 697.399150         | 349.203213       | 696.415134        | 348.711205       | 7  |
| 14 | 1393.768557        | 697.387917      | 1376.742008 | 688.874642       | 1375.757992       | 688.382634       | P    | <b>586.330736</b>  | 293.669006        | 569.304187         | 285.155731       | <b>568.320171</b> | 284.663723       | 6  |
| 15 | 1450.790021        | 725.898649      | 1433.763472 | 717.385374       | 1432.779456       | 716.893366       | G    | 489.277972         | 245.142624        | 472.251423         | 236.629349       | 471.267407        | 236.137341       | 5  |
| 16 | 1507.811485        | 754.409381      | 1490.784936 | 745.896106       | 1489.800920       | 745.404098       | G    | 432.256508         | 216.631892        | 415.229959         | 208.118617       | 414.245943        | 207.626609       | 4  |
| 17 | 1594.843513        | 797.925395      | 1577.816964 | 789.412120       | 1576.832948       | 788.920112       | S    | 375.235044         | 188.121160        | 358.208495         | 179.607885       | <b>357.224479</b> | 179.115877       | 3  |
| 18 | <b>1707.927577</b> | 854.467427      | 1690.901028 | 845.954152       | 1689.917012       | 845.462144       | L    | 288.203016         | 144.605146        | 271.176467         | 136.091871       |                   |                  | 2  |
| 19 |                    |                 |             |                  |                   |                  | R    | 175.118952         | 88.063114         | 158.092403         | 79.549839        |                   |                  | 1  |

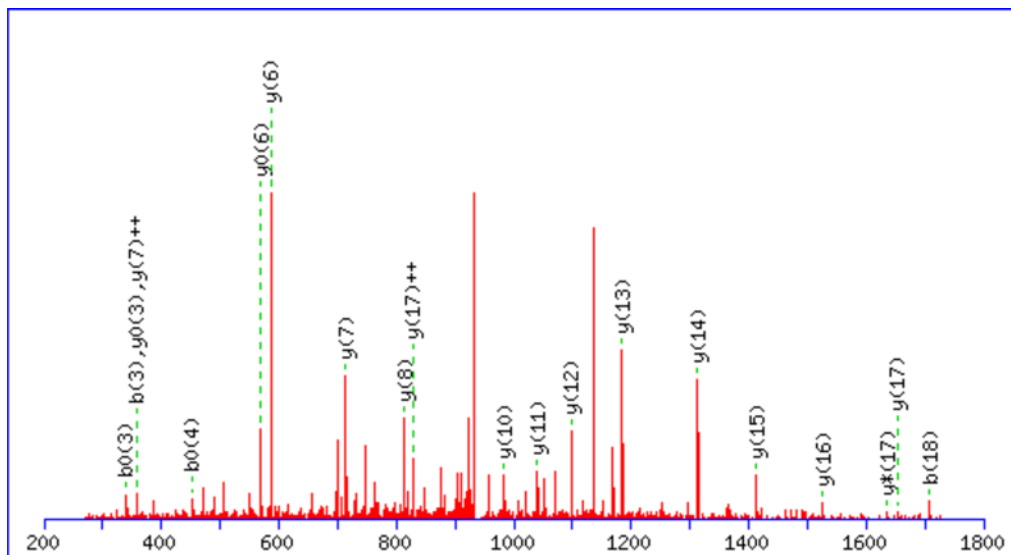

## Peptide View

### MS/MS Fragmentation of **ISGLIYEETR**

Found in **IP100453473**, Tax\_Id=9606 Gene\_Symbol=HIST1H4K;HIST1H4D;HIST4H4;HIST1H4F;HIST1H4E;HIST1H4J;HIST2H4A;HIST1H4B;HIST1H4I;HIST1H4A;HIST1H4L;HIST1H4H;HIST1H4C;HIST2H4B Histone H4

**Experiment:** 26 - NOPD2 **Fraction:** NOPD2

Match to Query 6340: 1179.615248 from(590.814900,2+)

Title: OECHL100312\_22.13004.13004.2.dta

Data file \\Boromir\masse\Data LTQ-Orbitrap\Chrystelle Lacroix\Etude clinique sJPU\OECHL100312\_22.raw

**Monoisotopic mass of neutral peptide Mr(calc):** 1179.613525 **Fixed modifications:** Carbamidomethyl (C) (apply to specified residues or termini only) **Ions Score:** 61

**Expect:** 5.1e-005 **Matches :** 22/86 fragment ions using 41 most intense peaks ([help](#))

| # | b                 | b <sup>++</sup> | b <sup>0</sup>    | b <sup>0++</sup> | Seq. | y                  | y <sup>++</sup>   | y <sup>*</sup> | y <sup>*++</sup> | y <sup>0</sup>    | y <sup>0++</sup> | #  |
|---|-------------------|-----------------|-------------------|------------------|------|--------------------|-------------------|----------------|------------------|-------------------|------------------|----|
| 1 | 114.091340        | 57.549308       |                   |                  | I    |                    |                   |                |                  |                   |                  | 10 |
| 2 | <b>201.123368</b> | 101.065322      | 183.112803        | 92.060039        | S    | <b>1067.536766</b> | <b>534.272021</b> | 1050.510217    | 525.758747       | 1049.526201       | 525.266739       | 9  |
| 3 | <b>258.144832</b> | 129.576054      | <b>240.134267</b> | 120.570771       | G    | <b>980.504738</b>  | <b>490.756007</b> | 963.478189     | 482.242733       | 962.494173        | 481.750725       | 8  |
| 4 | <b>371.228896</b> | 186.118086      | 353.218331        | 177.112803       | L    | <b>923.483274</b>  | 462.245275        | 906.456725     | 453.732001       | <b>905.472709</b> | 453.239993       | 7  |
| 5 | <b>484.312960</b> | 242.660118      | 466.302395        | 233.654835       | I    | <b>810.399210</b>  | <b>405.703243</b> | 793.372661     | 397.189969       | 792.388645        | 396.697961       | 6  |



|    |             |            |            |            |   |            |            |            |            |            |            |   |
|----|-------------|------------|------------|------------|---|------------|------------|------------|------------|------------|------------|---|
| 6  | 647.376289  | 324.191783 | 629.365724 | 315.186500 | Y | 697.315146 | 349.161211 | 680.288597 | 340.647937 | 679.304581 | 340.155929 | 5 |
| 7  | 776.418882  | 388.713079 | 758.408317 | 379.707797 | E | 534.251817 | 267.629547 | 517.225268 | 259.116272 | 516.241252 | 258.624264 | 4 |
| 8  | 905.461475  | 453.234376 | 887.450910 | 444.229093 | E | 405.209224 | 203.108250 | 388.182675 | 194.594975 | 387.198659 | 194.102967 | 3 |
| 9  | 1006.509154 | 503.758215 | 988.498589 | 494.752933 | T | 276.166631 | 138.586953 | 259.140082 | 130.073679 | 258.156066 | 129.581671 | 2 |
| 10 |             |            |            |            | R | 175.118952 | 88.063114  | 158.092403 | 79.549839  |            |            | 1 |

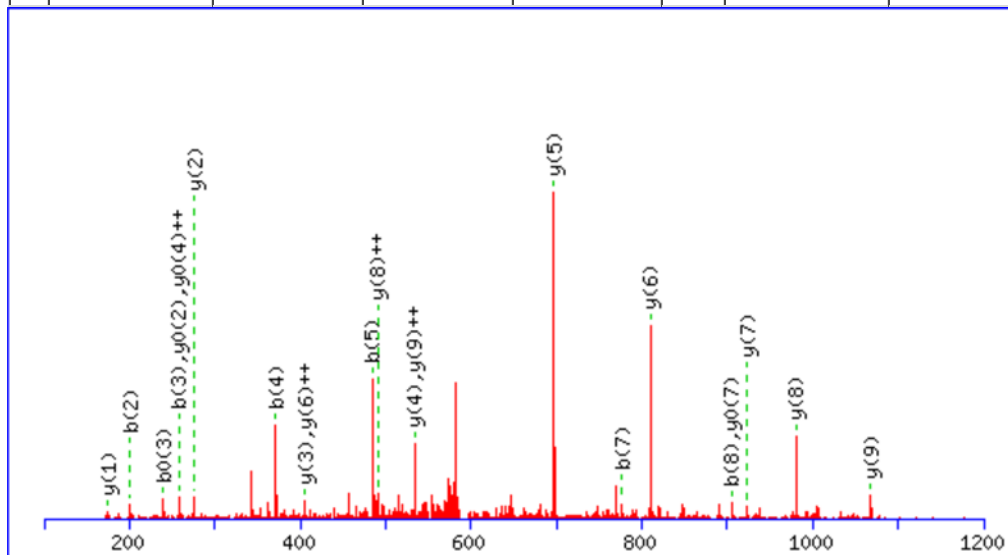

## Peptide View

MS/MS Fragmentation of **TLGDQLSLLLGAR**

Found in **IP100005707**, Tax\_Id=9606 Gene\_Symbol=MRC2 C-type mannose receptor 2

**Experiment:** 26 - NOPD2 **Fraction:** NOPD2

Match to Query 8956: 1355.778448 from(678.896500,2+)

Title: OECHL100312\_22.20007.20007.2.dta

Data file \\Boromir\masse\Data LTQ-Orbitrap\Chrystelle Lacroix\Etude clinique sJPU\OECHL100312\_22.raw

**Monoisotopic mass of neutral peptide Mr(calc):** 1355.777252 **Fixed modifications:** Carbamidomethyl (C) (apply to specified residues or termini only) **Ions Score:** 64

**Expect:** 1.6e-005 **Matches :** 20/124 fragment ions using 36 most intense peaks ([help](#))

| # | b          | b <sup>++</sup> | b* | b <sup>***</sup> | b <sup>0</sup> | b <sup>0++</sup> | Seq. | y | y <sup>++</sup> | y* | y <sup>***</sup> | y <sup>0</sup> | y <sup>0++</sup> | #  |
|---|------------|-----------------|----|------------------|----------------|------------------|------|---|-----------------|----|------------------|----------------|------------------|----|
| 1 | 102.054955 | 51.531116       |    |                  | 84.044390      | 42.525833        | T    |   |                 |    |                  |                |                  | 13 |

|    |                    |            |             |            |                    |            |   |                    |                   |             |            |             |            |           |
|----|--------------------|------------|-------------|------------|--------------------|------------|---|--------------------|-------------------|-------------|------------|-------------|------------|-----------|
| 2  | <b>215.139019</b>  | 108.073147 |             |            | 197.128454         | 99.067865  | L | 1255.736863        | 628.372069        | 1238.710314 | 619.858795 | 1237.726298 | 619.366787 | <b>12</b> |
| 3  | <b>272.160483</b>  | 136.583879 |             |            | 254.149918         | 127.578597 | G | <b>1142.652799</b> | 571.830038        | 1125.626250 | 563.316763 | 1124.642234 | 562.824755 | <b>11</b> |
| 4  | <b>387.187426</b>  | 194.097351 |             |            | 369.176861         | 185.092069 | D | <b>1085.631335</b> | 543.319305        | 1068.604786 | 534.806031 | 1067.620770 | 534.314023 | <b>10</b> |
| 5  | 515.246004         | 258.126640 | 498.219455  | 249.613366 | 497.235439         | 249.121358 | Q | <b>970.604392</b>  | 485.805834        | 953.577843  | 477.292559 | 952.593827  | 476.800551 | <b>9</b>  |
| 6  | 628.330068         | 314.668672 | 611.303519  | 306.155398 | 610.319503         | 305.663390 | L | <b>842.545814</b>  | 421.776545        | 825.519265  | 413.263270 | 824.535249  | 412.771262 | <b>8</b>  |
| 7  | 715.362096         | 358.184686 | 698.335547  | 349.671412 | <b>697.351531</b>  | 349.179404 | S | <b>729.461750</b>  | 365.234513        | 712.435201  | 356.721238 | 711.451185  | 356.229230 | <b>7</b>  |
| 8  | <b>828.446160</b>  | 414.726718 | 811.419611  | 406.213444 | 810.435595         | 405.721436 | L | 642.429722         | <b>321.718499</b> | 625.403173  | 313.205224 |             |            | <b>6</b>  |
| 9  | <b>941.530224</b>  | 471.268750 | 924.503675  | 462.755476 | <b>923.519659</b>  | 462.263468 | L | <b>529.345658</b>  | 265.176467        | 512.319109  | 256.663192 |             |            | <b>5</b>  |
| 10 | <b>1054.614288</b> | 527.810782 | 1037.587739 | 519.297508 | <b>1036.603723</b> | 518.805500 | L | <b>416.261594</b>  | 208.634435        | 399.235045  | 200.121160 |             |            | <b>4</b>  |
| 11 | 1111.635752        | 556.321514 | 1094.609203 | 547.808240 | 1093.625187        | 547.316231 | G | <b>303.177530</b>  | 152.092403        | 286.150981  | 143.579128 |             |            | <b>3</b>  |
| 12 | <b>1182.672866</b> | 591.840071 | 1165.646317 | 583.326797 | 1164.662301        | 582.834788 | A | <b>246.156066</b>  | 123.581671        | 229.129517  | 115.068396 |             |            | <b>2</b>  |
| 13 |                    |            |             |            |                    |            | R | 175.118952         | 88.063114         | 158.092403  | 79.549839  |             |            | <b>1</b>  |

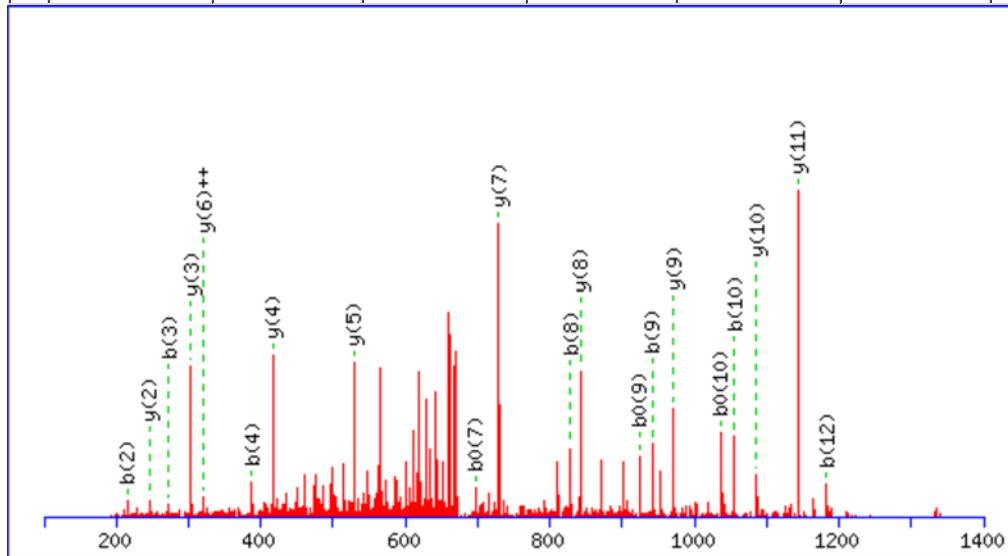

## Peptide View

MS/MS Fragmentation of **IESVLSSSGKR**

Found in **IP10018236**, Tax\_Id=9606 Gene\_Symbol=GM2A Ganglioside GM2 activator

Experiment: 26 - NOPD2 Fraction: NOPD2

Match to Query 6034: 1161.636648 from(581.825600,2+)

Title: OECHL100312\_22.5587.5587.2.dta

Data file \\Boromir\masse\Data LTQ-Orbitrap\Chrystelle Lacroix\Etude clinique sJPU\OECHL100312\_22.raw

**Monoisotopic mass of neutral peptide Mr(calc):** 1161.635330**Fixed modifications:** Carbamidomethyl (C) (apply to specified residues or termini only)**Ions Score:** 62**Expect:** 3.9e-005**Matches :** 26/94 fragment ions using 45 most intense peaks ([help](#))

| #  | b                 | b <sup>++</sup>   | b*         | b <sup>*++</sup> | b <sup>0</sup>    | b <sup>0++</sup> | Seq. | y                  | y <sup>++</sup>   | y*                | y <sup>*++</sup>  | y <sup>0</sup>    | y <sup>0++</sup>  | #  |
|----|-------------------|-------------------|------------|------------------|-------------------|------------------|------|--------------------|-------------------|-------------------|-------------------|-------------------|-------------------|----|
| 1  | 114.091340        | 57.549308         |            |                  |                   |                  | I    |                    |                   |                   |                   |                   |                   | 11 |
| 2  | <b>243.133933</b> | 122.070605        |            |                  | 225.123368        | 113.065322       | E    | <b>1049.558562</b> | <b>525.282919</b> | 1032.532013       | 516.769645        | 1031.547997       | 516.277637        | 10 |
| 3  | <b>330.165961</b> | 165.586618        |            |                  | <b>312.155396</b> | 156.581336       | S    | <b>920.515969</b>  | <b>460.761623</b> | <b>903.489420</b> | <b>452.248348</b> | <b>902.505404</b> | <b>451.756340</b> | 9  |
| 4  | <b>429.234375</b> | <b>215.120826</b> |            |                  | <b>411.223810</b> | 206.115543       | V    | <b>833.483941</b>  | 417.245609        | 816.457392        | 408.732334        | 815.473376        | 408.240326        | 8  |
| 5  | 542.318439        | 271.662858        |            |                  | 524.307874        | 262.657575       | L    | <b>734.415527</b>  | <b>367.711402</b> | 717.388978        | 359.198127        | 716.404962        | 358.706119        | 7  |
| 6  | 629.350467        | 315.178872        |            |                  | 611.339902        | 306.173589       | S    | <b>621.331463</b>  | 311.169370        | 604.304914        | 302.656095        | 603.320898        | 302.164087        | 6  |
| 7  | 716.382495        | 358.694886        |            |                  | 698.371930        | 349.689603       | S    | <b>534.299435</b>  | 267.653356        | 517.272886        | 259.140081        | 516.288870        | 258.648073        | 5  |
| 8  | 803.414523        | 402.210899        |            |                  | 785.403958        | 393.205617       | S    | <b>447.267407</b>  | 224.137342        | 430.240858        | <b>215.624067</b> | <b>429.256842</b> | <b>215.132059</b> | 4  |
| 9  | 860.435987        | 430.721632        |            |                  | 842.425422        | 421.716349       | G    | <b>360.235379</b>  | 180.621328        | 343.208830        | 172.108053        |                   |                   | 3  |
| 10 | <b>988.530950</b> | 494.769113        | 971.504401 | 486.255838       | 970.520385        | 485.763830       | K    | 303.213915         | 152.110596        | 286.187366        | 143.597321        |                   |                   | 2  |
| 11 |                   |                   |            |                  |                   |                  | R    | <b>175.118952</b>  | 88.063114         | 158.092403        | 79.549840         |                   |                   | 1  |

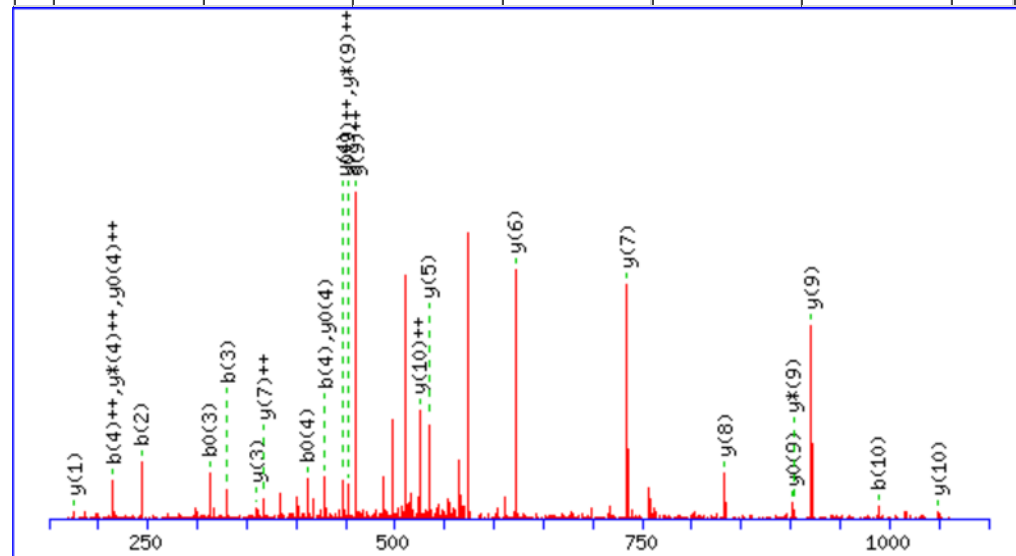

## Peptide View

MS/MS Fragmentation of **ATGDIKVTSEIK**

Found in **IPI00302614**, Tax\_Id=9606 Gene\_Symbol=VTCN1 V-set domain containing T cell activation inhibitor 1

**Experiment:** 26 - NOPD2 **Fraction:** NOPD2

Match to Query 9353: 1389.735248 from(695.874900,2+)

Title: OECHL100312\_22.8363.8363.2.dta

Data file \\Boromir\masse\Data LTQ-Orbitrap\Chrystelle Lacroix\Etude clinique sJPU\OECHL100312\_22.raw

**Monoisotopic mass of neutral peptide Mr(calc):** 1389.735107**Fixed modifications:** Carbamidomethyl (C) (apply to specified residues or termini only)**Ions Score:** 57

**Expect:** 0.00024**Matches :** 32/128 fragment ions using 58 most intense peaks ([help](#))

| #  | b                  | b <sup>++</sup>   | b*                 | b <sup>*++</sup> | b <sup>0</sup>     | b <sup>0++</sup> | Seq. | y                  | y <sup>++</sup>   | y*                | y <sup>*++</sup>  | y <sup>0</sup>    | y <sup>0++</sup>  | #  |
|----|--------------------|-------------------|--------------------|------------------|--------------------|------------------|------|--------------------|-------------------|-------------------|-------------------|-------------------|-------------------|----|
| 1  | 72.044390          | 36.525833         |                    |                  |                    |                  | A    |                    |                   |                   |                   |                   |                   | 13 |
| 2  | 173.092069         | 87.049672         |                    |                  | 155.081504         | 78.044390        | T    | <b>1319.705288</b> | 660.356282        | 1302.678739       | 651.843008        | 1301.694723       | 651.350999        | 12 |
| 3  | 230.113533         | 115.560404        |                    |                  | 212.102968         | 106.555122       | G    | <b>1218.657609</b> | <b>609.832442</b> | 1201.631060       | 601.319168        | 1200.647044       | 600.827160        | 11 |
| 4  | <b>345.140476</b>  | 173.073876        |                    |                  | <b>327.129911</b>  | 164.068593       | D    | <b>1161.636145</b> | <b>581.321710</b> | 1144.609596       | 572.808436        | 1143.625580       | 572.316428        | 10 |
| 5  | <b>458.224540</b>  | 229.615908        |                    |                  | <b>440.213975</b>  | 220.610626       | I    | <b>1046.609202</b> | <b>523.808239</b> | 1029.582653       | 515.294964        | 1028.598637       | 514.802956        | 9  |
| 6  | 586.319503         | 293.663390        | 569.292954         | 285.150115       | 568.308938         | 284.658107       | K    | <b>933.525138</b>  | 467.266207        | <b>916.498589</b> | <b>458.752932</b> | <b>915.514573</b> | <b>458.260924</b> | 8  |
| 7  | 685.387917         | 343.197597        | 668.361368         | 334.684322       | 667.377352         | 334.192314       | V    | <b>805.430175</b>  | 403.218725        | 788.403626        | 394.705451        | <b>787.419610</b> | 394.213443        | 7  |
| 8  | <b>786.435596</b>  | 393.721436        | 769.409047         | 385.208162       | 768.425031         | 384.716154       | T    | <b>706.361761</b>  | 353.684518        | 689.335212        | <b>345.171244</b> | 688.351196        | 344.679236        | 6  |
| 9  | <b>915.478189</b>  | <b>458.242733</b> | 898.451640         | 449.729458       | 897.467624         | 449.237450       | E    | 605.314082         | 303.160679        | 588.287533        | 294.647404        | 587.303517        | 294.155396        | 5  |
| 10 | <b>1002.510217</b> | 501.758747        | 985.483668         | 493.245472       | 984.499652         | 492.753464       | S    | <b>476.271489</b>  | 238.639382        | 459.244940        | 230.126108        | <b>458.260924</b> | 229.634100        | 4  |
| 11 | <b>1131.552810</b> | 566.280043        | <b>1114.526261</b> | 557.766769       | <b>1113.542245</b> | 557.274760       | E    | 389.239461         | 195.123368        | 372.212912        | 186.610094        | 371.228896        | 186.118086        | 3  |
| 12 | <b>1244.636874</b> | 622.822075        | 1227.610325        | 614.308800       | <b>1226.626309</b> | 613.816792       | I    | <b>260.196868</b>  | 130.602072        | 243.170319        | 122.088797        |                   |                   | 2  |
| 13 |                    |                   |                    |                  |                    |                  | K    | 147.112804         | 74.060040         | 130.086255        | 65.546765         |                   |                   | 1  |

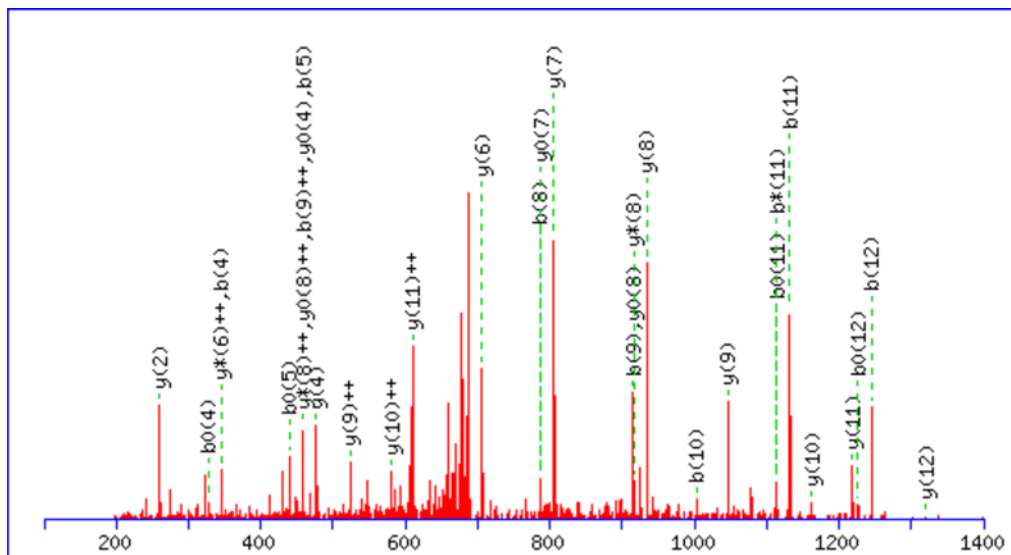

## Peptide View

MS/MS Fragmentation of **ATLLEEQLPLGK**

Found in **IPI00414542**, Tax\_Id=9606 Gene\_Symbol=PDCD1LG2 Isoform 1 of Programmed cell death 1 ligand 2

**Experiment:** 26 - NOPD2 **Fraction:** NOPD2

Match to Query 8427: 1310.744648 from(656.379600,2+)

Title: OECHL100312\_22.17080.17080.2.dta

Data file \\Boromir\masse\Data LTQ-Orbitrap\Chrystelle Lacroix\Etude clinique sJPU\OECHL100312\_22.raw

**Monoisotopic mass of neutral peptide Mr(calc):** 1310.744537 **Fixed modifications:** Carbamidomethyl (C) (apply to specified residues or termini only) **Ions Score:** 52

**Expect:** 0.00028 **Matches :** 16/106 fragment ions using 23 most intense peaks ([help](#))

| # | b                 | b <sup>++</sup> | b <sup>*</sup> | b <sup>*++</sup> | b <sup>0</sup>    | b <sup>0++</sup> | Seq. | y                  | y <sup>++</sup>   | y <sup>*</sup> | y <sup>*++</sup> | y <sup>0</sup> | y <sup>0++</sup> | #  |
|---|-------------------|-----------------|----------------|------------------|-------------------|------------------|------|--------------------|-------------------|----------------|------------------|----------------|------------------|----|
| 1 | 72.044390         | 36.525833       |                |                  |                   |                  | A    |                    |                   |                |                  |                |                  | 12 |
| 2 | 173.092069        | 87.049672       |                |                  | 155.081504        | 78.044390        | T    | 1240.714731        | 620.861004        | 1223.688182    | 612.347729       | 1222.704166    | 611.855721       | 11 |
| 3 | <b>286.176133</b> | 143.591704      |                |                  | <b>268.165568</b> | 134.586422       | L    | 1139.667052        | <b>570.337164</b> | 1122.640503    | 561.823890       | 1121.656487    | 561.331882       | 10 |
| 4 | 399.260197        | 200.133737      |                |                  | 381.249632        | 191.128454       | L    | <b>1026.582988</b> | 513.795132        | 1009.556439    | 505.281858       | 1008.572423    | 504.789850       | 9  |
| 5 | 528.302790        | 264.655033      |                |                  | 510.292225        | 255.649751       | E    | <b>913.498924</b>  | 457.253100        | 896.472375     | 448.739825       | 895.488359     | 448.247818       | 8  |
| 6 | 657.345383        | 329.176330      |                |                  | 639.334818        | 320.171047       | E    | <b>784.456331</b>  | 392.731804        | 767.429782     | 384.218529       | 766.445766     | 383.726521       | 7  |

|    |                    |            |                   |            |                   |            |          |                   |            |                   |            |  |  |          |
|----|--------------------|------------|-------------------|------------|-------------------|------------|----------|-------------------|------------|-------------------|------------|--|--|----------|
| 7  | <b>785.403961</b>  | 393.205619 | 768.377412        | 384.692344 | 767.393396        | 384.200336 | <b>Q</b> | 655.413738        | 328.210507 | <b>638.387189</b> | 319.697232 |  |  | <b>6</b> |
| 8  | <b>898.488025</b>  | 449.747651 | <b>881.461476</b> | 441.234376 | <b>880.477460</b> | 440.742368 | <b>L</b> | <b>527.355160</b> | 264.181218 | 510.328611        | 255.667943 |  |  | <b>5</b> |
| 9  | 995.540789         | 498.274033 | 978.514240        | 489.760758 | 977.530224        | 489.268750 | <b>P</b> | <b>414.271096</b> | 207.639186 | 397.244547        | 199.125911 |  |  | <b>4</b> |
| 10 | <b>1108.624853</b> | 554.816065 | 1091.598304       | 546.302790 | 1090.614288       | 545.810782 | <b>L</b> | <b>317.218332</b> | 159.112804 | 300.191783        | 150.599529 |  |  | <b>3</b> |
| 11 | 1165.646317        | 583.326797 | 1148.619768       | 574.813522 | 1147.635752       | 574.321514 | <b>G</b> | <b>204.134268</b> | 102.570772 | 187.107719        | 94.057497  |  |  | <b>2</b> |
| 12 |                    |            |                   |            |                   |            | <b>K</b> | 147.112804        | 74.060040  | 130.086255        | 65.546765  |  |  | <b>1</b> |

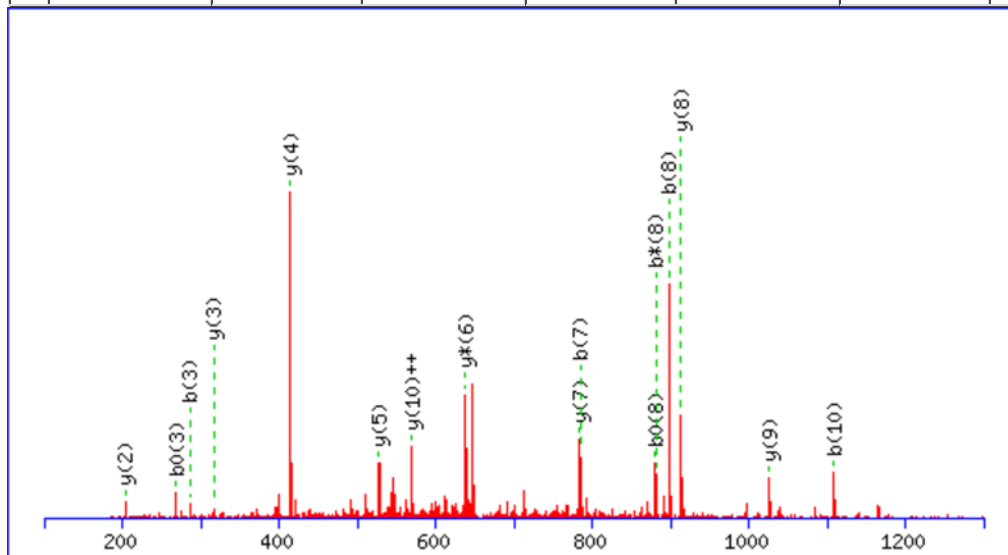

## Peptide View

MS/MS Fragmentation of **SYDLDPGAGSLEI**

Found in **IPI00299435**, Tax\_Id=9606 Gene\_Symbol=APOF apolipoprotein F precursor

**Experiment:** 26 - NOPD2 **Fraction:** NOPD2

Match to Query 8717: 1335.620648 from(668.817600,2+)

Title: OECHL100312\_22.18439.18439.2.dta

Data file \\Boromir\masse\Data LTQ-Orbitrap\Chrystelle Lacroix\Etude clinique sJPU\OECHL100312\_22.raw

**Monoisotopic mass of neutral peptide Mr(calc):** 1335.619415 **Fixed modifications:** Carbamidomethyl (C) (apply to specified residues or termini only) **Ions Score:** 50

**Expect:** 0.00071 **Matches :** 13/94 fragment ions using 22 most intense peaks ([help](#))

| # | b | b <sup>++</sup> | b <sup>0</sup> | b <sup>0++</sup> | Seq. | y | y <sup>++</sup> | y <sup>0</sup> | y <sup>0++</sup> | # |
|---|---|-----------------|----------------|------------------|------|---|-----------------|----------------|------------------|---|
|---|---|-----------------|----------------|------------------|------|---|-----------------|----------------|------------------|---|

|    |                    |            |                   |                   |   |                   |            |             |                   |    |
|----|--------------------|------------|-------------------|-------------------|---|-------------------|------------|-------------|-------------------|----|
| 1  | 88.039304          | 44.523290  | 70.028739         | 35.518008         | S |                   |            |             |                   | 13 |
| 2  | <b>251.102633</b>  | 126.054954 | 233.092068        | 117.049672        | Y | 1249.594675       | 625.300975 | 1231.584110 | 616.295693        | 12 |
| 3  | <b>366.129576</b>  | 183.568426 | 348.119011        | 174.563144        | D | 1086.531346       | 543.769311 | 1068.520781 | 534.764028        | 11 |
| 4  | <b>479.213640</b>  | 240.110458 | 461.203075        | 231.105176        | L | 971.504403        | 486.255839 | 953.493838  | 477.250557        | 10 |
| 5  | <b>594.240583</b>  | 297.623930 | 576.230018        | 288.618647        | D | <b>858.420339</b> | 429.713807 | 840.409774  | 420.708525        | 9  |
| 6  | 691.293347         | 346.150312 | 673.282782        | 337.145029        | P | <b>743.393396</b> | 372.200336 | 725.382831  | 363.195053        | 8  |
| 7  | 748.314811         | 374.661044 | 730.304246        | 365.655761        | G | 646.340632        | 323.673954 | 628.330067  | 314.668671        | 7  |
| 8  | <b>819.351925</b>  | 410.179601 | 801.341360        | 401.174318        | A | 589.319168        | 295.163222 | 571.308603  | 286.157939        | 6  |
| 9  | 876.373389         | 438.690333 | <b>858.362824</b> | 429.685050        | G | 518.282054        | 259.644665 | 500.271489  | <b>250.639382</b> | 5  |
| 10 | <b>963.405417</b>  | 482.206347 | 945.394852        | 473.201064        | S | 461.260590        | 231.133933 | 443.250025  | 222.128650        | 4  |
| 11 | <b>1076.489481</b> | 538.748379 | 1058.478916       | 529.743096        | L | 374.228562        | 187.617919 | 356.217997  | 178.612636        | 3  |
| 12 | <b>1205.532074</b> | 603.269675 | 1187.521509       | <b>594.264392</b> | E | 261.144498        | 131.075887 | 243.133933  | 122.070604        | 2  |
| 13 |                    |            |                   |                   | I | 132.101905        | 66.554590  |             |                   | 1  |

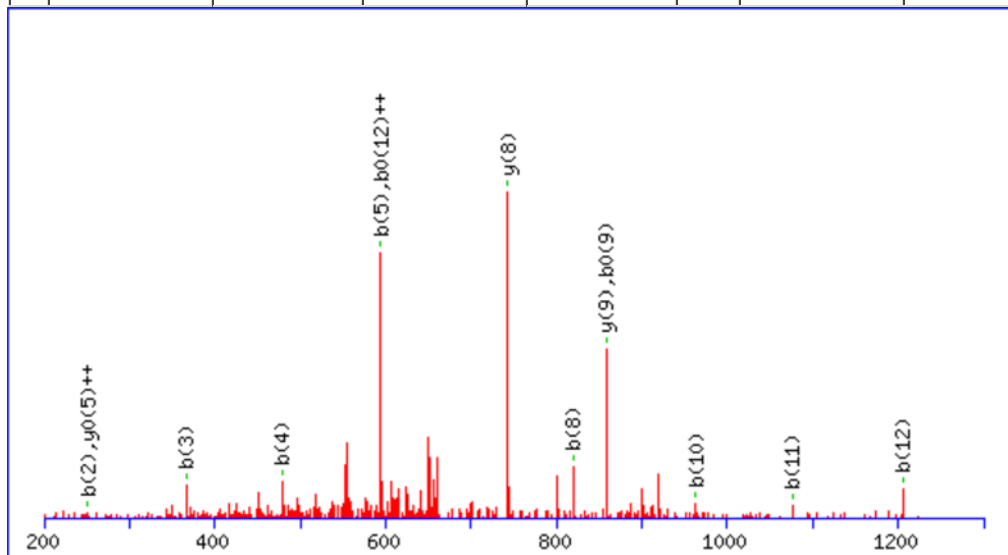

## Peptide View

MS/MS Fragmentation of **IQEVAGSLIFR**

Found in **IPI00006988**, Tax\_Id=9606 Gene\_Symbol=RETN Resistin

Experiment: 26 - NOPD2 Fraction: NOPD2

Match to Query 7270: 1231.693448 from(616.854000,2+)

Title: OECHL100312\_22.17087.17087.2.dta

Data file \\Boromir\masse\Data LTQ-Orbitrap\Chrystelle Lacroix\Etude clinique sJPU\OECHL100312\_22.raw

**Monoisotopic mass of neutral peptide Mr(calc):** 1231.692459**Fixed modifications:** Carbamidomethyl (C) (apply to specified residues or termini only)**Ions Score:** 49

**Expect:** 0.00057**Matches :** 15/106 fragment ions using 33 most intense peaks ([help](#))

| #  | b                  | b <sup>++</sup> | b*                | b <sup>*++</sup> | b <sup>0</sup> | b <sup>0++</sup> | Seq. | y                 | y <sup>++</sup> | y*          | y <sup>*++</sup>  | y <sup>0</sup> | y <sup>0++</sup> | #  |
|----|--------------------|-----------------|-------------------|------------------|----------------|------------------|------|-------------------|-----------------|-------------|-------------------|----------------|------------------|----|
| 1  | 114.091340         | 57.549308       |                   |                  |                |                  | I    |                   |                 |             |                   |                |                  | 11 |
| 2  | <b>242.149918</b>  | 121.578597      | <b>225.123369</b> | 113.065323       |                |                  | Q    | 1119.615685       | 560.311481      | 1102.589136 | 551.798206        | 1101.605120    | 551.306198       | 10 |
| 3  | <b>371.192511</b>  | 186.099894      | 354.165962        | 177.586619       | 353.181946     | 177.094611       | E    | <b>991.557107</b> | 496.282192      | 974.530558  | 487.768917        | 973.546542     | 487.276909       | 9  |
| 4  | <b>470.260925</b>  | 235.634101      | 453.234376        | 227.120826       | 452.250360     | 226.628818       | V    | <b>862.514514</b> | 431.760895      | 845.487965  | 423.247621        | 844.503949     | 422.755613       | 8  |
| 5  | <b>541.298039</b>  | 271.152658      | 524.271490        | 262.639383       | 523.287474     | 262.147375       | A    | <b>763.446100</b> | 382.226688      | 746.419551  | 373.713414        | 745.435535     | 373.221406       | 7  |
| 6  | <b>598.319503</b>  | 299.663390      | 581.292954        | 291.150115       | 580.308938     | 290.658107       | G    | <b>692.408986</b> | 346.708131      | 675.382437  | 338.194857        | 674.398421     | 337.702849       | 6  |
| 7  | 685.351531         | 343.179404      | 668.324982        | 334.666129       | 667.340966     | 334.174121       | S    | 635.387522        | 318.197399      | 618.360973  | 309.684125        | 617.376957     | 309.192117       | 5  |
| 8  | <b>798.435595</b>  | 399.721436      | 781.409046        | 391.208161       | 780.425030     | 390.716153       | L    | 548.355494        | 274.681385      | 531.328945  | <b>266.168111</b> |                |                  | 4  |
| 9  | <b>911.519659</b>  | 456.263468      | 894.493110        | 447.750193       | 893.509094     | 447.258185       | I    | 435.271430        | 218.139353      | 418.244881  | 209.626078        |                |                  | 3  |
| 10 | <b>1058.588073</b> | 529.797675      | 1041.561524       | 521.284400       | 1040.577508    | 520.792392       | F    | <b>322.187366</b> | 161.597321      | 305.160817  | 153.084046        |                |                  | 2  |
| 11 |                    |                 |                   |                  |                |                  | R    | 175.118952        | 88.063114       | 158.092403  | 79.549839         |                |                  | 1  |

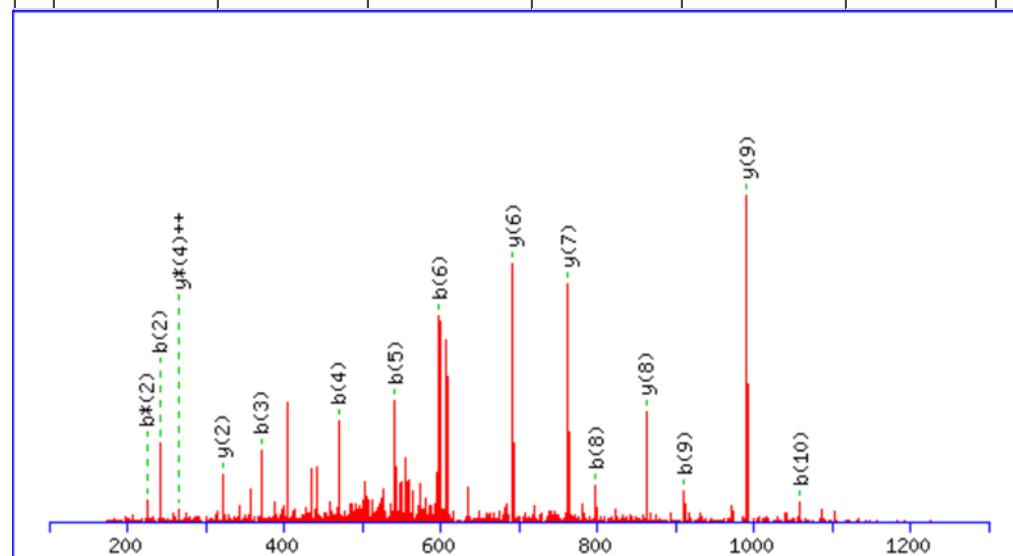



## Peptide View

MS/MS Fragmentation of **CQCPAGAALQADGR**

Found in **IP100010737**, Tax\_Id=9606 Gene\_Symbol=THBD Thrombomodulin

Experiment: S\_B-2 Fraction: S\_B-2

Match to Query 10302: 1473.645648 from(737.830100,2+)

Title: OECHL100312\_19.9139.9139.2.dta

Data file \\Boromir\masse\Data LTQ-Orbitrap\Chrystelle Lacroix\Etude clinique sJPU\OECHL100312\_19.raw

**Monoisotopic mass of neutral peptide Mr(calc):** 1473.645279**Fixed modifications:** Carbamidomethyl (C) (apply to specified residues or termini only)**Ions Score:** 76

**Expect:** 1.3e-006**Matches :** 27/128 fragment ions using 47 most intense peaks ([help](#))

| #  | b                  | b <sup>++</sup> | b*                | b <sup>*++</sup> | b <sup>0</sup>     | b <sup>0++</sup> | Seq. | y                  | y <sup>++</sup>   | y*                 | y <sup>*++</sup> | y <sup>0</sup> | y <sup>0++</sup> | #  |
|----|--------------------|-----------------|-------------------|------------------|--------------------|------------------|------|--------------------|-------------------|--------------------|------------------|----------------|------------------|----|
| 1  | 161.037925         | 81.022600       |                   |                  |                    |                  | C    |                    |                   |                    |                  |                |                  | 14 |
| 2  | <b>289.096503</b>  | 145.051890      | <b>272.069954</b> | 136.538615       |                    |                  | Q    | 1314.621912        | 657.814594        | 1297.595363        | 649.301320       | 1296.611347    | 648.809312       | 13 |
| 3  | <b>449.127152</b>  | 225.067214      | 432.100603        | 216.553940       |                    |                  | C    | <b>1186.563334</b> | <b>593.785305</b> | 1169.536785        | 585.272031       | 1168.552769    | 584.780023       | 12 |
| 4  | <b>546.179916</b>  | 273.593596      | 529.153367        | 265.080322       |                    |                  | P    | <b>1026.532685</b> | 513.769981        | <b>1009.506136</b> | 505.256706       | 1008.522120    | 504.764698       | 11 |
| 5  | <b>617.217030</b>  | 309.112153      | 600.190481        | 300.598879       |                    |                  | A    | <b>929.479921</b>  | 465.243599        | <b>912.453372</b>  | 456.730324       | 911.469356     | 456.238316       | 10 |
| 6  | <b>674.238494</b>  | 337.622885      | 657.211945        | 329.109611       |                    |                  | G    | <b>858.442807</b>  | 429.725042        | 841.416258         | 421.211767       | 840.432242     | 420.719759       | 9  |
| 7  | 745.275608         | 373.141442      | 728.249059        | 364.628168       |                    |                  | A    | 801.421343         | 401.214310        | 784.394794         | 392.701035       | 783.410778     | 392.209027       | 8  |
| 8  | <b>816.312722</b>  | 408.659999      | 799.286173        | 400.146725       |                    |                  | A    | <b>730.384229</b>  | 365.695753        | 713.357680         | 357.182478       | 712.373664     | 356.690470       | 7  |
| 9  | <b>929.396786</b>  | 465.202031      | <b>912.370237</b> | 456.688757       |                    |                  | L    | <b>659.347115</b>  | 330.177196        | 642.320566         | 321.663921       | 641.336550     | 321.171913       | 6  |
| 10 | <b>1057.455364</b> | 529.231320      | 1040.428815       | 520.718046       |                    |                  | Q    | <b>546.263051</b>  | 273.635164        | 529.236502         | 265.121889       | 528.252486     | 264.629881       | 5  |
| 11 | <b>1128.492478</b> | 564.749877      | 1111.465929       | 556.236603       |                    |                  | A    | <b>418.204473</b>  | 209.605874        | 401.177924         | 201.092600       | 400.193908     | 200.600592       | 4  |
| 12 | <b>1243.519421</b> | 622.263349      | 1226.492872       | 613.750074       | <b>1225.508856</b> | 613.258066       | D    | <b>347.167359</b>  | 174.087317        | 330.140810         | 165.574043       | 329.156794     | 165.082035       | 3  |
| 13 | <b>1300.540885</b> | 650.774081      | 1283.514336       | 642.260806       | 1282.530320        | 641.768798       | G    | <b>232.140416</b>  | 116.573846        | 215.113867         | 108.060571       |                |                  | 2  |
| 14 |                    |                 |                   |                  |                    |                  | R    | 175.118952         | 88.063114         | 158.092403         | 79.549839        |                |                  | 1  |

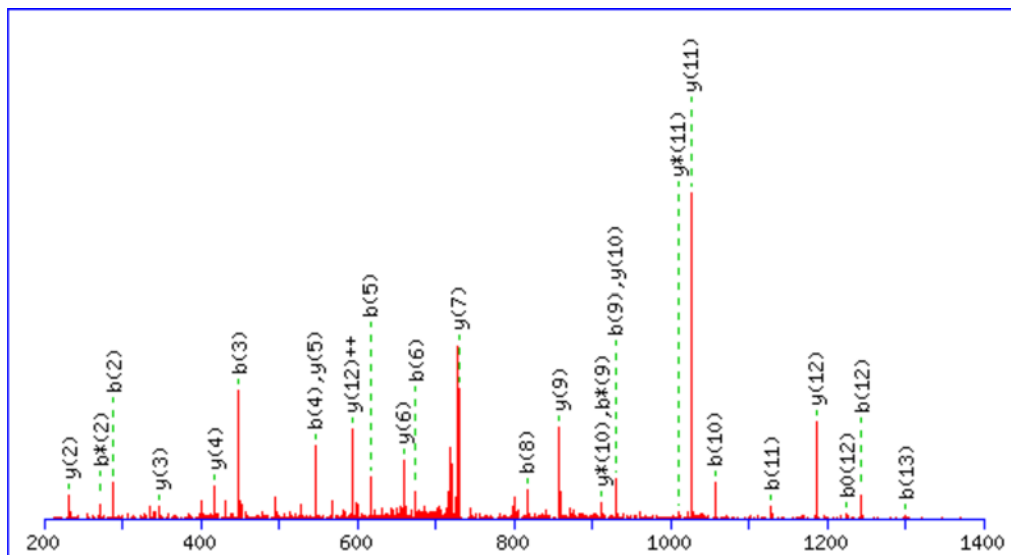

## Peptide View

MS/MS Fragmentation of **NPVLQQDAHSSVTITPQR**

Found in **IPI00410488**, Tax\_Id=9606 Gene\_Symbol=CD276 Isoform 1 of CD276 antigen

Experiment: S\_B-2 Fraction: S\_B-2

Match to Query 14570: 1990.026048 from(996.020300,2+)

Title: OECHL100312\_19.11409.11409.2.dta

Data file \\Boromir\masse\Data LTQ-Orbitrap\Chrystelle Lacroix\Etude clinique sJPU\OECHL100312\_19.raw

**Monoisotopic mass of neutral peptide Mr(calc):** 1990.023209 **Fixed modifications:** Carbamidomethyl (C) (apply to specified residues or termini only) **Ions Score:** 95

**Expect:** 3.7e-008 **Matches :** 15/186 fragment ions using 16 most intense peaks ([help](#))

| # | b                 | b <sup>++</sup> | b <sup>*</sup> | b <sup>*++</sup> | b <sup>0</sup> | b <sup>0++</sup> | Seq. | y                  | y <sup>++</sup>   | y <sup>*</sup> | y <sup>*++</sup> | y <sup>0</sup> | y <sup>0++</sup> | #  |
|---|-------------------|-----------------|----------------|------------------|----------------|------------------|------|--------------------|-------------------|----------------|------------------|----------------|------------------|----|
| 1 | 115.050203        | 58.028740       | 98.023654      | 49.515465        |                |                  | N    |                    |                   |                |                  |                |                  | 18 |
| 2 | 212.102967        | 106.555121      | 195.076418     | 98.041847        |                |                  | P    | 1876.987553        | 938.997415        | 1859.961004    | 930.484140       | 1858.976988    | 929.992132       | 17 |
| 3 | <b>311.171381</b> | 156.089328      | 294.144832     | 147.576054       |                |                  | V    | <b>1779.934789</b> | 890.471033        | 1762.908240    | 881.957758       | 1761.924224    | 881.465750       | 16 |
| 4 | 424.255445        | 212.631361      | 407.228896     | 204.118086       |                |                  | L    | <b>1680.866375</b> | <b>840.936826</b> | 1663.839826    | 832.423551       | 1662.855810    | 831.931543       | 15 |
| 5 | 552.314023        | 276.660650      | 535.287474     | 268.147375       |                |                  | Q    | 1567.782311        | 784.394794        | 1550.755762    | 775.881519       | 1549.771746    | 775.389511       | 14 |
| 6 | 680.372601        | 340.689939      | 663.346052     | 332.176664       |                |                  | Q    | 1439.723733        | 720.365505        | 1422.697184    | 711.852230       | 1421.713168    | 711.360222       | 13 |

|    |                    |            |             |            |                    |            |   |                    |            |             |            |             |            |    |
|----|--------------------|------------|-------------|------------|--------------------|------------|---|--------------------|------------|-------------|------------|-------------|------------|----|
| 7  | 795.399544         | 398.203410 | 778.372995  | 389.690136 | 777.388979         | 389.198128 | D | <b>1311.665155</b> | 656.336215 | 1294.638606 | 647.822941 | 1293.654590 | 647.330933 | 12 |
| 8  | 866.436658         | 433.721967 | 849.410109  | 425.208693 | 848.426093         | 424.716685 | A | <b>1196.638212</b> | 598.822744 | 1179.611663 | 590.309470 | 1178.627647 | 589.817462 | 11 |
| 9  | 1003.495570        | 502.251423 | 986.469021  | 493.738149 | 985.485005         | 493.246141 | H | <b>1125.601098</b> | 563.304187 | 1108.574549 | 554.790913 | 1107.590533 | 554.298905 | 10 |
| 10 | 1090.527598        | 545.767437 | 1073.501049 | 537.254163 | 1072.517033        | 536.762155 | S | <b>988.542186</b>  | 494.774731 | 971.515637  | 486.261457 | 970.531621  | 485.769449 | 9  |
| 11 | 1177.559626        | 589.283451 | 1160.533077 | 580.770177 | 1159.549061        | 580.278169 | S | 901.510158         | 451.258717 | 884.483609  | 442.745443 | 883.499593  | 442.253435 | 8  |
| 12 | 1276.628040        | 638.817658 | 1259.601491 | 630.304384 | 1258.617475        | 629.812376 | V | 814.478130         | 407.742703 | 797.451581  | 399.229428 | 796.467565  | 398.737420 | 7  |
| 13 | 1377.675719        | 689.341498 | 1360.649170 | 680.828223 | 1359.665154        | 680.336215 | T | <b>715.409716</b>  | 358.208496 | 698.383167  | 349.695221 | 697.399151  | 349.203213 | 6  |
| 14 | <b>1490.759783</b> | 745.883530 | 1473.733234 | 737.370255 | <b>1472.749218</b> | 736.878247 | I | <b>614.362037</b>  | 307.684656 | 597.335488  | 299.171382 | 596.351472  | 298.679374 | 5  |
| 15 | 1591.807462        | 796.407369 | 1574.780913 | 787.894095 | 1573.796897        | 787.402087 | T | <b>501.277973</b>  | 251.142624 | 484.251424  | 242.629350 | 483.267408  | 242.137342 | 4  |
| 16 | 1688.860226        | 844.933751 | 1671.833677 | 836.420477 | 1670.849661        | 835.928469 | P | <b>400.230294</b>  | 200.618785 | 383.203745  | 192.105510 |             |            | 3  |
| 17 | 1816.918804        | 908.963040 | 1799.892255 | 900.449766 | 1798.908239        | 899.957758 | Q | 303.177530         | 152.092403 | 286.150981  | 143.579128 |             |            | 2  |
| 18 |                    |            |             |            |                    |            | R | 175.118952         | 88.063114  | 158.092403  | 79.549839  |             |            | 1  |

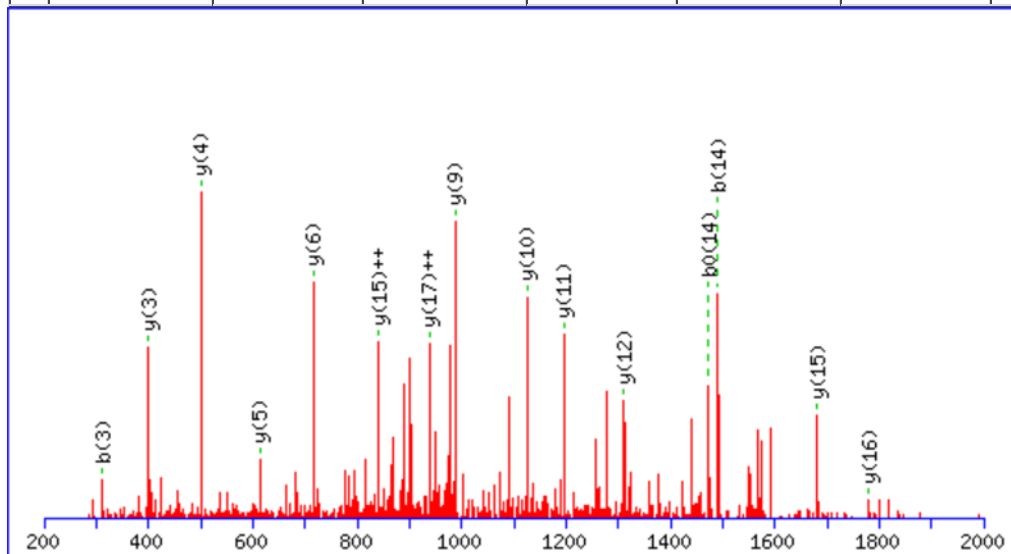

## Peptide View

MS/MS Fragmentation of **CPLQDFLR**

Found in **IPI00003807**, Tax\_Id=9606 Gene\_Symbol=ACP2 Lysosomal acid phosphatase

Experiment: S\_B-2 Fraction: S\_B-2

Match to Query 4655: 1047.516848 from(524.765700,2+)

Title: OECHL100312\_19.17455.17455.2.dta

Data file \\Boromir\masse\Data LTQ-Orbitrap\Chrystelle Lacroix\Etude clinique sJPU\OECHL100312\_19.raw

**Monoisotopic mass of neutral peptide Mr(calc):** 1047.517151**Fixed modifications:** Carbamidomethyl (C) (apply to specified residues or termini only)**Ions Score:** 53**Expect:** 0.00046**Matches :** 11/64 fragment ions using 18 most intense peaks ([help](#))

| # | b                 | b <sup>++</sup> | b*         | b <sup>*++</sup>  | b <sup>0</sup> | b <sup>0++</sup> | Seq. | y                 | y <sup>++</sup> | y*         | y <sup>*++</sup> | y <sup>0</sup> | y <sup>0++</sup>  | # |
|---|-------------------|-----------------|------------|-------------------|----------------|------------------|------|-------------------|-----------------|------------|------------------|----------------|-------------------|---|
| 1 | 161.037925        | 81.022600       |            |                   |                |                  | C    |                   |                 |            |                  |                |                   | 8 |
| 2 | <b>258.090689</b> | 129.548982      |            |                   |                |                  | P    | <b>888.493779</b> | 444.750528      | 871.467230 | 436.237253       | 870.483214     | <b>435.745245</b> | 7 |
| 3 | <b>371.174753</b> | 186.091015      |            |                   |                |                  | L    | <b>791.441015</b> | 396.224146      | 774.414466 | 387.710871       | 773.430450     | 387.218863        | 6 |
| 4 | 499.233331        | 250.120304      | 482.206782 | <b>241.607029</b> |                |                  | Q    | <b>678.356951</b> | 339.682114      | 661.330402 | 331.168839       | 660.346386     | 330.676831        | 5 |
| 5 | 614.260274        | 307.633775      | 597.233725 | 299.120501        | 596.249709     | 298.628493       | D    | <b>550.298373</b> | 275.652825      | 533.271824 | 267.139550       | 532.287808     | 266.647542        | 4 |
| 6 | 761.328688        | 381.167982      | 744.302139 | 372.654708        | 743.318123     | 372.162700       | F    | <b>435.271430</b> | 218.139353      | 418.244881 | 209.626079       |                |                   | 3 |
| 7 | 874.412752        | 437.710014      | 857.386203 | 429.196740        | 856.402187     | 428.704732       | L    | <b>288.203016</b> | 144.605146      | 271.176467 | 136.091872       |                |                   | 2 |
| 8 |                   |                 |            |                   |                |                  | R    | <b>175.118952</b> | 88.063114       | 158.092403 | 79.549840        |                |                   | 1 |

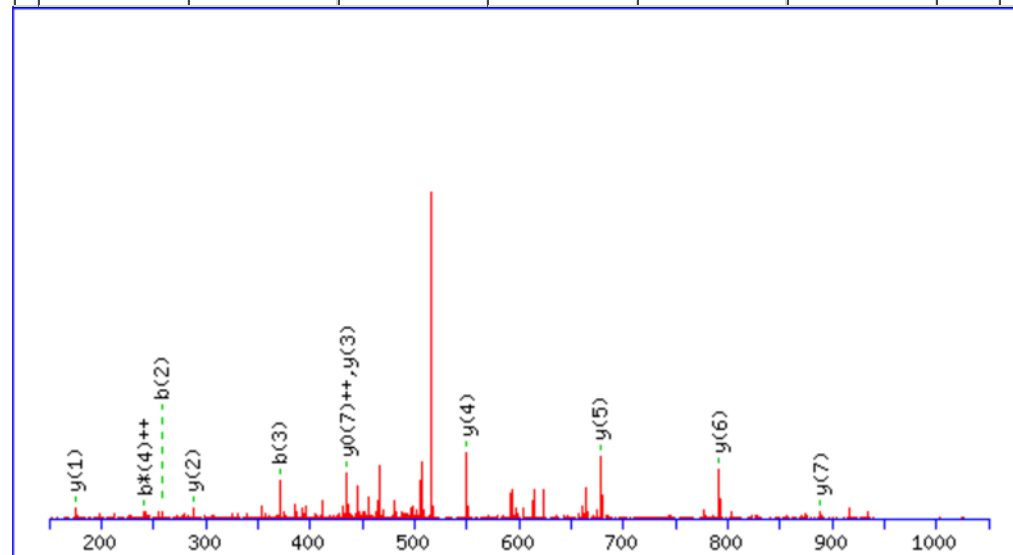

## Peptide View

MS/MS Fragmentation of **EVQLVESGGGLVKGPSLR**

Found in **IPI00783024**, Tax\_Id=9606 Gene\_Symbol=- Myosin-reactive immunoglobulin heavy chain variable region (Fragment)

Experiment: S\_B-2 Fraction: S\_B-2

Match to Query 13925: 1881.032048 from(941.523300,2+)

Title: OECHL100312\_19.14400.14400.2.dta

Data file \\Boromir\masse\Data LTQ-Orbitrap\Chrystelle Lacroix\Etude clinique sJPU\OECHL100312\_19.raw

**Monoisotopic mass of neutral peptide Mr(calc):** 1881.031982**Fixed modifications:** Carbamidomethyl (C) (apply to specified residues or termini only)**Ions Score:** 77

**Expect:** 1.2e-006**Matches :** 50/208 fragment ions using 75 most intense peaks ([help](#))

| #  | b                  | b <sup>++</sup> | b*                 | b <sup>*++</sup>  | b <sup>0</sup>     | b <sup>0++</sup>  | Seq. | y                  | y <sup>++</sup>   | y*                 | y <sup>*++</sup>  | y <sup>0</sup>     | y <sup>0++</sup>  | #  |
|----|--------------------|-----------------|--------------------|-------------------|--------------------|-------------------|------|--------------------|-------------------|--------------------|-------------------|--------------------|-------------------|----|
| 1  | 130.049869         | 65.528572       |                    |                   | 112.039304         | 56.523290         | E    |                    |                   |                    |                   |                    |                   | 19 |
| 2  | 229.118283         | 115.062780      |                    |                   | 211.107718         | 106.057497        | V    | 1752.996660        | 877.001968        | 1735.970111        | 868.488694        | 1734.986095        | 867.996686        | 18 |
| 3  | <b>357.176861</b>  | 179.092069      | <b>340.150312</b>  | 170.578794        | <b>339.166296</b>  | 170.086786        | Q    | <b>1653.928246</b> | <b>827.467761</b> | 1636.901697        | <b>818.954487</b> | 1635.917681        | <b>818.462479</b> | 17 |
| 4  | <b>470.260925</b>  | 235.634101      | <b>453.234376</b>  | 227.120826        | <b>452.250360</b>  | 226.628818        | L    | <b>1525.869668</b> | <b>763.438472</b> | 1508.843119        | 754.925198        | 1507.859103        | 754.433190        | 16 |
| 5  | <b>569.329339</b>  | 285.168308      | <b>552.302790</b>  | 276.655033        | <b>551.318774</b>  | 276.163025        | V    | <b>1412.785604</b> | 706.896440        | 1395.759055        | <b>698.383166</b> | <b>1394.775039</b> | 697.891158        | 15 |
| 6  | <b>698.371932</b>  | 349.689604      | 681.345383         | <b>341.176330</b> | 680.361367         | <b>340.684322</b> | E    | <b>1313.717190</b> | <b>657.362233</b> | <b>1296.690641</b> | 648.848959        | <b>1295.706625</b> | 648.356951        | 14 |
| 7  | 785.403960         | 393.205618      | 768.377411         | 384.692344        | 767.393395         | 384.200336        | S    | <b>1184.674597</b> | 592.840937        | 1167.648048        | 584.327662        | 1166.664032        | 583.835654        | 13 |
| 8  | 842.425424         | 421.716350      | 825.398875         | 413.203076        | 824.414859         | 412.711068        | G    | <b>1097.642569</b> | 549.324923        | 1080.616020        | 540.811648        | 1079.632004        | 540.319640        | 12 |
| 9  | 899.446888         | 450.227082      | 882.420339         | 441.713808        | 881.436323         | 441.221800        | G    | <b>1040.621105</b> | 520.814191        | 1023.594556        | 512.300916        | 1022.610540        | 511.808908        | 11 |
| 10 | <b>956.468352</b>  | 478.737814      | 939.441803         | <b>470.224540</b> | 938.457787         | 469.732532        | G    | <b>983.599641</b>  | 492.303459        | 966.573092         | 483.790184        | 965.589076         | 483.298176        | 10 |
| 11 | <b>1069.552416</b> | 535.279846      | <b>1052.525867</b> | 526.766572        | <b>1051.541851</b> | 526.274564        | L    | 926.578177         | 463.792727        | 909.551628         | 455.279452        | 908.567612         | 454.787444        | 9  |
| 12 | <b>1168.620830</b> | 584.814053      | 1151.594281        | 576.300779        | <b>1150.610265</b> | 575.808771        | V    | <b>813.494113</b>  | 407.250695        | 796.467564         | 398.737420        | 795.483548         | 398.245412        | 8  |
| 13 | <b>1296.715793</b> | 648.861535      | 1279.689244        | 640.348260        | 1278.705228        | 639.856252        | K    | <b>714.425699</b>  | <b>357.716487</b> | 697.399150         | 349.203213        | <b>696.415134</b>  | 348.711205        | 7  |
| 14 | 1393.768557        | 697.387917      | 1376.742008        | 688.874642        | 1375.757992        | 688.382634        | P    | <b>586.330736</b>  | 293.669006        | <b>569.304187</b>  | 285.155731        | <b>568.320171</b>  | 284.663723        | 6  |
| 15 | 1450.790021        | 725.898649      | 1433.763472        | 717.385374        | 1432.779456        | 716.893366        | G    | <b>489.277972</b>  | 245.142624        | 472.251423         | 236.629349        | 471.267407         | 236.137341        | 5  |
| 16 | 1507.811485        | 754.409381      | 1490.784936        | 745.896106        | 1489.800920        | 745.404098        | G    | 432.256508         | 216.631892        | 415.229959         | 208.118617        | 414.245943         | 207.626609        | 4  |
| 17 | <b>1594.843513</b> | 797.925395      | 1577.816964        | 789.412120        | 1576.832948        | 788.920112        | S    | 375.235044         | 188.121160        | <b>358.208495</b>  | 179.607885        | <b>357.224479</b>  | 179.115877        | 3  |
| 18 | <b>1707.927577</b> | 854.467427      | 1690.901028        | 845.954152        | 1689.917012        | 845.462144        | L    | 288.203016         | 144.605146        | 271.176467         | 136.091871        |                    |                   | 2  |
| 19 |                    |                 |                    |                   |                    |                   | R    | 175.118952         | 88.063114         | 158.092403         | 79.549839         |                    |                   | 1  |

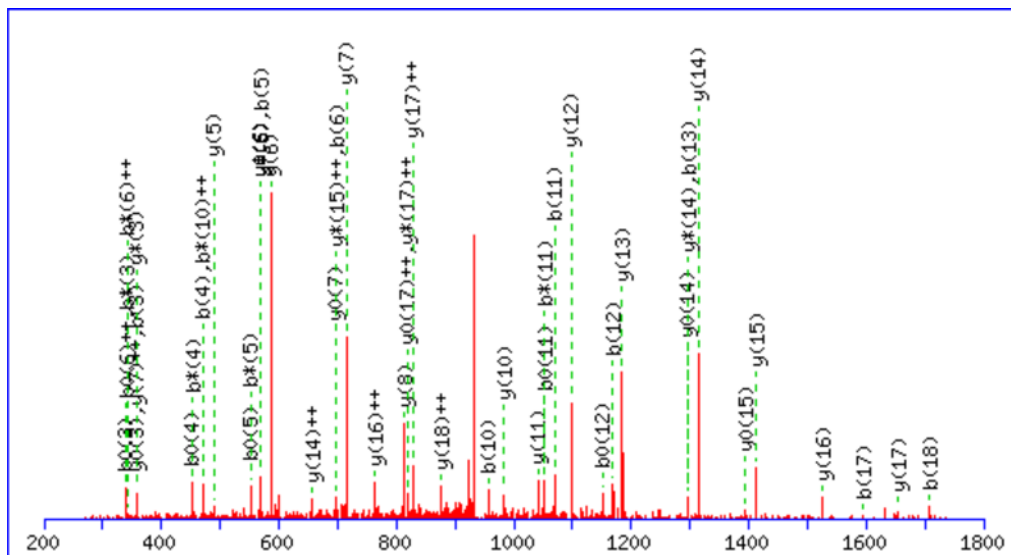

## Peptide View

MS/MS Fragmentation of **LLIYDASNLETGVPSR**

Found in **IP100003111**, Tax\_Id=9606 Gene\_Symbol=LOC652694 Ig kappa chain V-I region AU

Experiment: S\_B-2 Fraction: S\_B-2

Match to Query 12801: 1746.917048 from(874.465800,2+)

Title: OECHL100312\_19.17548.17548.2.dta

Data file \\Boromir\masse\Data LTQ-Orbitrap\Chrystelle Lacroix\Etude clinique sJPU\OECHL100312\_19.raw

**Monoisotopic mass of neutral peptide Mr(calc):** 1746.915192 **Fixed modifications:** Carbamidomethyl (C) (apply to specified residues or termini only) **Ions Score:** 81

**Expect:** 9e-007 **Matches :** 30/156 fragment ions using 44 most intense peaks ([help](#))

| # | b                 | b <sup>++</sup> | b* | b* <sup>++</sup> | b <sup>0</sup> | b <sup>0++</sup> | Seq. | y                  | y <sup>++</sup>   | y*          | y* <sup>++</sup>  | y <sup>0</sup>     | y <sup>0++</sup>  | #  |
|---|-------------------|-----------------|----|------------------|----------------|------------------|------|--------------------|-------------------|-------------|-------------------|--------------------|-------------------|----|
| 1 | 114.091340        | 57.549308       |    |                  |                |                  | L    |                    |                   |             |                   |                    |                   | 16 |
| 2 | 227.175404        | 114.091340      |    |                  |                |                  | L    | 1634.838427        | 817.922852        | 1617.811878 | 809.409577        | 1616.827862        | 808.917569        | 15 |
| 3 | <b>340.259468</b> | 170.633372      |    |                  |                |                  | I    | <b>1521.754363</b> | 761.380820        | 1504.727814 | <b>752.867545</b> | 1503.743798        | <b>752.375537</b> | 14 |
| 4 | 503.322797        | 252.165036      |    |                  |                |                  | Y    | 1408.670299        | <b>704.838788</b> | 1391.643750 | 696.325513        | <b>1390.659734</b> | 695.833505        | 13 |
| 5 | 618.349740        | 309.678508      |    |                  | 600.339175     | 300.673226       | D    | <b>1245.606970</b> | 623.307123        | 1228.580421 | 614.793849        | 1227.596405        | 614.301841        | 12 |
| 6 | 689.386854        | 345.197065      |    |                  | 671.376289     | 336.191782       | A    | <b>1130.580027</b> | 565.793652        | 1113.553478 | 557.280377        | 1112.569462        | 556.788369        | 11 |

|    |                    |                   |                    |                   |                    |                   |   |                    |            |             |            |                   |            |    |
|----|--------------------|-------------------|--------------------|-------------------|--------------------|-------------------|---|--------------------|------------|-------------|------------|-------------------|------------|----|
| 7  | 776.418882         | 388.713079        |                    |                   | 758.408317         | 379.707796        | S | <b>1059.542913</b> | 530.275095 | 1042.516364 | 521.761820 | 1041.532348       | 521.269812 | 10 |
| 8  | 890.461809         | 445.734542        | <b>873.435260</b>  | 437.221268        | 872.451244         | 436.729260        | N | <b>972.510885</b>  | 486.759081 | 955.484336  | 478.245806 | 954.500320        | 477.753798 | 9  |
| 9  | <b>1003.545873</b> | 502.276574        | 986.519324         | 493.763300        | 985.535308         | 493.271292        | L | <b>858.467958</b>  | 429.737617 | 841.441409  | 421.224343 | 840.457393        | 420.732335 | 8  |
| 10 | <b>1132.588466</b> | 566.797871        | 1115.561917        | <b>558.284597</b> | 1114.577901        | <b>557.792588</b> | E | <b>745.383894</b>  | 373.195585 | 728.357345  | 364.682311 | 727.373329        | 364.190303 | 7  |
| 11 | <b>1233.636145</b> | <b>617.321710</b> | 1216.609596        | 608.808436        | 1215.625580        | 608.316428        | T | <b>616.341301</b>  | 308.674289 | 599.314752  | 300.161014 | 598.330736        | 299.669006 | 6  |
| 12 | <b>1290.657609</b> | 645.832442        | 1273.631060        | 637.319168        | <b>1272.647044</b> | 636.827160        | G | <b>515.293622</b>  | 258.150449 | 498.267073  | 249.637175 | 497.283057        | 249.145167 | 5  |
| 13 | <b>1389.726023</b> | 695.366649        | <b>1372.699474</b> | 686.853375        | 1371.715458        | 686.361367        | V | <b>458.272158</b>  | 229.639717 | 441.245609  | 221.126443 | 440.261593        | 220.634435 | 4  |
| 14 | 1486.778787        | 743.893032        | 1469.752238        | 735.379757        | 1468.768222        | 734.887749        | P | <b>359.203744</b>  | 180.105510 | 342.177195  | 171.592236 | <b>341.193179</b> | 171.100228 | 3  |
| 15 | <b>1573.810815</b> | 787.409046        | 1556.784266        | 778.895771        | <b>1555.800250</b> | 778.403763        | S | 262.150980         | 131.579128 | 245.124431  | 123.065854 | 244.140415        | 122.573846 | 2  |
| 16 |                    |                   |                    |                   |                    |                   | R | 175.118952         | 88.063114  | 158.092403  | 79.549839  |                   |            | 1  |

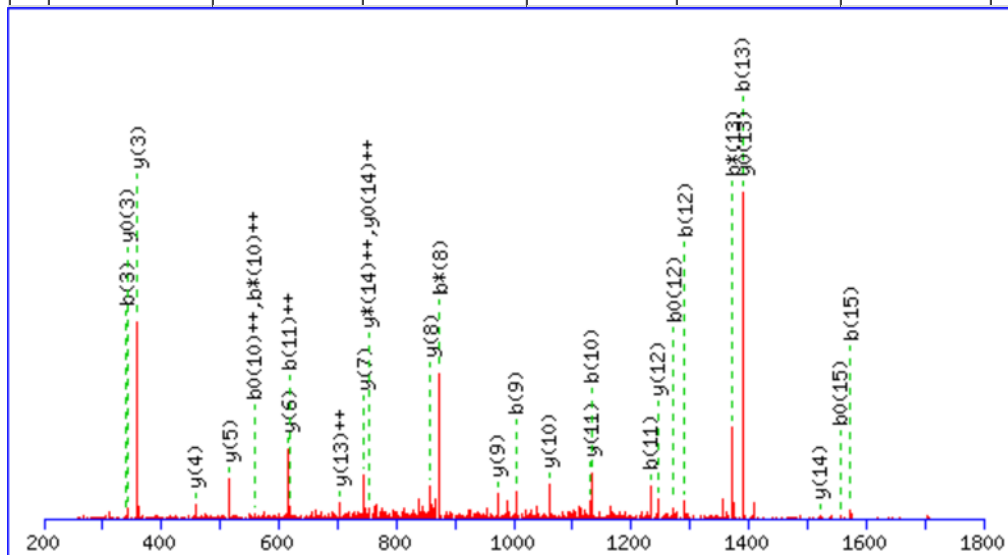

## Peptide View

MS/MS Fragmentation of **AAQGLLACGVAQGALR**

Found in **IP100021085**, Tax\_Id=9606 Gene\_Symbol=PGLYRP1 Peptidoglycan recognition protein

Experiment: S\_B-2 Fraction: S\_B-2

Match to Query 11169: 1554.830448 from(778.422500,2+)

Title: OECHL100312\_19.15886.15886.2.dta

Data file \\Boromir\masse\Data LTQ-Orbitrap\Chrystelle Lacroix\Etude clinique sJPU\OECHL100312\_19.raw

**Monoisotopic mass of neutral peptide Mr(calc):** 1554.830032**Fixed modifications:** Carbamidomethyl (C) (apply to specified residues or termini only)**Ions Score:** 60**Expect:** 0.00012**Matches :** 16/116 fragment ions using 27 most intense peaks ([help](#))

| #  | b                  | b <sup>++</sup> | b*          | b <sup>*++</sup> | Seq. | y                  | y <sup>++</sup>   | y*          | y <sup>*++</sup> | #  |
|----|--------------------|-----------------|-------------|------------------|------|--------------------|-------------------|-------------|------------------|----|
| 1  | 72.044390          | 36.525833       |             |                  | A    |                    |                   |             |                  | 16 |
| 2  | 143.081504         | 72.044390       |             |                  | A    | 1484.800211        | 742.903743        | 1467.773662 | 734.390469       | 15 |
| 3  | 271.140082         | 136.073679      | 254.113533  | 127.560405       | Q    | 1413.763097        | 707.385186        | 1396.736548 | 698.871912       | 14 |
| 4  | 328.161546         | 164.584411      | 311.134997  | 156.071136       | G    | <b>1285.704519</b> | 643.355897        | 1268.677970 | 634.842623       | 13 |
| 5  | <b>441.245610</b>  | 221.126443      | 424.219061  | 212.613169       | L    | 1228.683055        | 614.845165        | 1211.656506 | 606.331891       | 12 |
| 6  | 554.329674         | 277.668475      | 537.303125  | 269.155201       | L    | <b>1115.598991</b> | 558.303133        | 1098.572442 | 549.789859       | 11 |
| 7  | <b>625.366788</b>  | 313.187032      | 608.340239  | 304.673758       | A    | <b>1002.514927</b> | 501.761101        | 985.488378  | 493.247827       | 10 |
| 8  | 785.397437         | 393.202357      | 768.370888  | 384.689082       | C    | <b>931.477813</b>  | <b>466.242544</b> | 914.451264  | 457.729270       | 9  |
| 9  | <b>842.418901</b>  | 421.713089      | 825.392352  | 413.199814       | G    | <b>771.447164</b>  | 386.227220        | 754.420615  | 377.713945       | 8  |
| 10 | 941.487315         | 471.247296      | 924.460766  | 462.734021       | V    | 714.425700         | 357.716488        | 697.399151  | 349.203213       | 7  |
| 11 | 1012.524429        | 506.765853      | 995.497880  | 498.252578       | A    | <b>615.357286</b>  | 308.182281        | 598.330737  | 299.669006       | 6  |
| 12 | <b>1140.583007</b> | 570.795142      | 1123.556458 | 562.281867       | Q    | <b>544.320172</b>  | <b>272.663724</b> | 527.293623  | 264.150449       | 5  |
| 13 | 1197.604471        | 599.305873      | 1180.577922 | 590.792599       | G    | <b>416.261594</b>  | 208.634435        | 399.235045  | 200.121160       | 4  |
| 14 | 1268.641585        | 634.824430      | 1251.615036 | 626.311156       | A    | 359.240130         | 180.123703        | 342.213581  | 171.610428       | 3  |
| 15 | <b>1381.725649</b> | 691.366462      | 1364.699100 | 682.853188       | L    | <b>288.203016</b>  | 144.605146        | 271.176467  | 136.091871       | 2  |
| 16 |                    |                 |             |                  | R    | 175.118952         | 88.063114         | 158.092403  | 79.549839        | 1  |



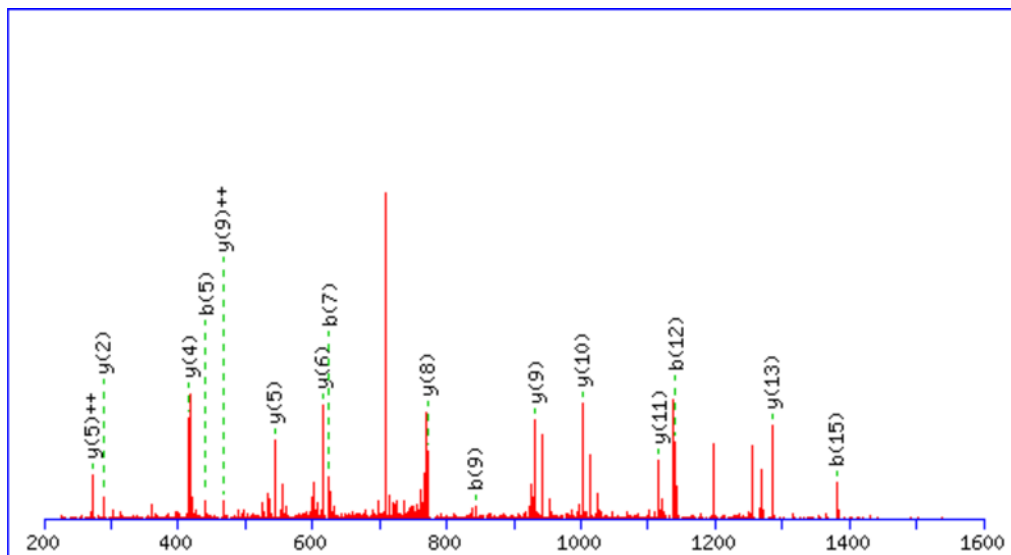

## Peptide View

MS/MS Fragmentation of **INQDPLGIQGR**

Found in **IPI00414909**, Tax\_Id=9606 Gene\_Symbol=NAGA Alpha-N-acetylgalactosaminidase

Experiment: S\_B-2 Fraction: S\_B-2

Match to Query 7014: 1209.645248 from(605.829900,2+)

Title: OECHL100312\_19.12329.12329.2.dta

Data file \\Boromir\masse\Data LTQ-Orbitrap\Chrystelle Lacroix\Etude clinique sJPU\OECHL100312\_19.raw

**Monoisotopic mass of neutral peptide Mr(calc):** 1209.646576 **Fixed modifications:** Carbamidomethyl (C) (apply to specified residues or termini only) **Ions Score:** 57

**Expect:** 0.00018 **Matches :** 19/98 fragment ions using 30 most intense peaks ([help](#))

| # | b                 | b <sup>++</sup> | b*         | b* <sup>++</sup> | b <sup>0</sup> | b <sup>0++</sup> | Seq. | y                  | y <sup>++</sup>   | y*                | y* <sup>++</sup> | y <sup>0</sup> | y <sup>0++</sup> | #  |
|---|-------------------|-----------------|------------|------------------|----------------|------------------|------|--------------------|-------------------|-------------------|------------------|----------------|------------------|----|
| 1 | 114.091340        | 57.549308       |            |                  |                |                  | I    |                    |                   |                   |                  |                |                  | 11 |
| 2 | <b>228.134267</b> | 114.570771      | 211.107718 | 106.057497       |                |                  | N    | <b>1097.569798</b> | <b>549.288537</b> | 1080.543249       | 540.775263       | 1079.559233    | 540.283255       | 10 |
| 3 | <b>356.192845</b> | 178.600060      | 339.166296 | 170.086786       |                |                  | Q    | <b>983.526871</b>  | <b>492.267074</b> | <b>966.500322</b> | 483.753799       | 965.516306     | 483.261791       | 9  |
| 4 | <b>471.219788</b> | 236.113532      | 454.193239 | 227.600258       | 453.209223     | 227.108250       | D    | <b>855.468293</b>  | 428.237785        | 838.441744        | 419.724510       | 837.457728     | 419.232502       | 8  |
| 5 | 568.272552        | 284.639914      | 551.246003 | 276.126640       | 550.261987     | 275.634632       | P    | <b>740.441350</b>  | 370.724313        | 723.414801        | 362.211039       |                |                  | 7  |
| 6 | <b>681.356616</b> | 341.181946      | 664.330067 | 332.668672       | 663.346051     | 332.176664       | L    | 643.388586         | 322.197931        | 626.362037        | 313.684657       |                |                  | 6  |

|    |             |            |             |            |             |            |   |            |            |            |            |  |  |   |
|----|-------------|------------|-------------|------------|-------------|------------|---|------------|------------|------------|------------|--|--|---|
| 7  | 738.378080  | 369.692678 | 721.351531  | 361.179404 | 720.367515  | 360.687396 | G | 530.304522 | 265.655899 | 513.277973 | 257.142625 |  |  | 5 |
| 8  | 851.462144  | 426.234710 | 834.435595  | 417.721436 | 833.451579  | 417.229428 | I | 473.283058 | 237.145167 | 456.256509 | 228.631892 |  |  | 4 |
| 9  | 979.520722  | 490.263999 | 962.494173  | 481.750725 | 961.510157  | 481.258717 | Q | 360.198994 | 180.603135 | 343.172445 | 172.089860 |  |  | 3 |
| 10 | 1036.542186 | 518.774731 | 1019.515637 | 510.261457 | 1018.531621 | 509.769449 | G | 232.140416 | 116.573846 | 215.113867 | 108.060571 |  |  | 2 |
| 11 |             |            |             |            |             |            | R | 175.118952 | 88.063114  | 158.092403 | 79.549839  |  |  | 1 |

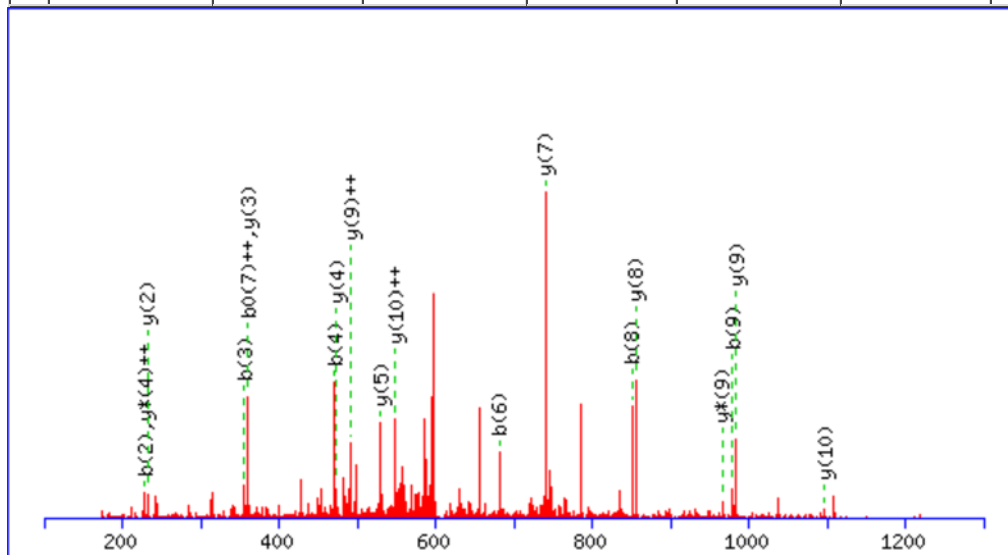

## Peptide View

MS/MS Fragmentation of **IESVLSSSGKR**

Found in **IP100018236**, Tax\_Id=9606 Gene\_Symbol=GM2A Ganglioside GM2 activator

Experiment: S\_B-2 Fraction: S\_B-2

Match to Query 6341: 1161.635648 from(581.825100,2+)

Title: OECHL100312\_19.6624.6624.2.dta

Data file \\Boromir\masse\Data LTQ-Orbitrap\Chrystelle Lacroix\Etude clinique sJPU\OECHL100312\_19.raw

**Monoisotopic mass of neutral peptide Mr(calc):** 1161.635330 **Fixed modifications:** Carbamidomethyl (C) (apply to specified residues or termini only) **Ions Score:** 55

**Expect:** 0.00018 **Matches :** 22/94 fragment ions using 37 most intense peaks ([help](#))

| # | b          | b <sup>++</sup> | b* | b* <sup>++</sup> | b <sup>0</sup> | b <sup>0++</sup> | Seq. | y | y <sup>++</sup> | y* | y* <sup>++</sup> | y <sup>0</sup> | y <sup>0++</sup> | #  |
|---|------------|-----------------|----|------------------|----------------|------------------|------|---|-----------------|----|------------------|----------------|------------------|----|
| 1 | 114.091340 | 57.549308       |    |                  |                |                  | I    |   |                 |    |                  |                |                  | 11 |

|    |                   |                   |            |            |                   |            |          |                    |                   |             |                   |             |                   |           |
|----|-------------------|-------------------|------------|------------|-------------------|------------|----------|--------------------|-------------------|-------------|-------------------|-------------|-------------------|-----------|
| 2  | <b>243.133933</b> | 122.070605        |            |            | 225.123368        | 113.065322 | <b>E</b> | <b>1049.558562</b> | <b>525.282919</b> | 1032.532013 | 516.769645        | 1031.547997 | 516.277637        | <b>10</b> |
| 3  | <b>330.165961</b> | 165.586618        |            |            | <b>312.155396</b> | 156.581336 | <b>S</b> | <b>920.515969</b>  | <b>460.761623</b> | 903.489420  | <b>452.248348</b> | 902.505404  | <b>451.756340</b> | <b>9</b>  |
| 4  | 429.234375        | <b>215.120826</b> |            |            | <b>411.223810</b> | 206.115543 | <b>V</b> | <b>833.483941</b>  | 417.245609        | 816.457392  | 408.732334        | 815.473376  | 408.240326        | <b>8</b>  |
| 5  | 542.318439        | 271.662858        |            |            | 524.307874        | 262.657575 | <b>L</b> | <b>734.415527</b>  | <b>367.711402</b> | 717.388978  | 359.198127        | 716.404962  | 358.706119        | <b>7</b>  |
| 6  | 629.350467        | 315.178872        |            |            | 611.339902        | 306.173589 | <b>S</b> | <b>621.331463</b>  | 311.169370        | 604.304914  | 302.656095        | 603.320898  | 302.164087        | <b>6</b>  |
| 7  | 716.382495        | 358.694886        |            |            | 698.371930        | 349.689603 | <b>S</b> | <b>534.299435</b>  | 267.653356        | 517.272886  | 259.140081        | 516.288870  | 258.648073        | <b>5</b>  |
| 8  | <b>803.414523</b> | 402.210899        |            |            | 785.403958        | 393.205617 | <b>S</b> | 447.267407         | 224.137342        | 430.240858  | <b>215.624067</b> | 429.256842  | <b>215.132059</b> | <b>4</b>  |
| 9  | 860.435987        | 430.721632        |            |            | 842.425422        | 421.716349 | <b>G</b> | <b>360.235379</b>  | 180.621328        | 343.208830  | 172.108053        |             |                   | <b>3</b>  |
| 10 | <b>988.530950</b> | 494.769113        | 971.504401 | 486.255838 | 970.520385        | 485.763830 | <b>K</b> | 303.213915         | 152.110596        | 286.187366  | 143.597321        |             |                   | <b>2</b>  |
| 11 |                   |                   |            |            |                   |            | <b>R</b> | <b>175.118952</b>  | 88.063114         | 158.092403  | 79.549840         |             |                   | <b>1</b>  |

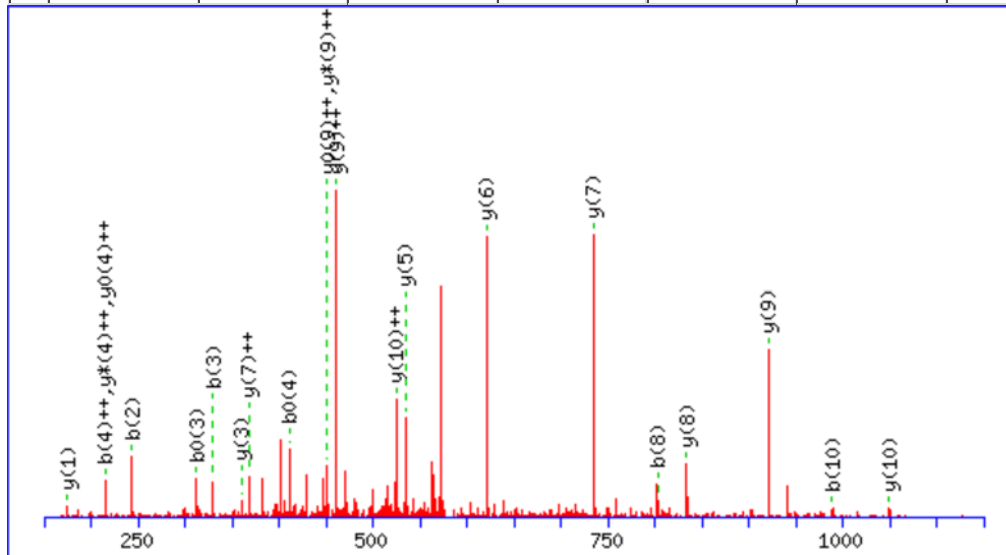

## Peptide View

MS/MS Fragmentation of **ATLLEEQLPLGK**

Found in **IP100414542**, Tax\_Id=9606 Gene\_Symbol=PDCD1LG2 Isoform 1 of Programmed cell death 1 ligand 2

**Experiment: S\_B-2 Fraction: S\_B-2**

Match to Query 8625: 1310.747248 from(656.380900,2+)

Title: OECHL100312\_19.17470.17470.2.dta

Data file \\Boromir\masse\Data LTQ-Orbitrap\Chrystelle Lacroix\Etude clinique sJPU\OECHL100312\_19.raw

**Monoisotopic mass of neutral peptide Mr(calc):** 1310.744537**Fixed modifications:** Carbamidomethyl (C) (apply to specified residues or termini only)**Ions Score:** 49**Expect:** 0.00056**Matches :** 16/106 fragment ions using 24 most intense peaks ([help](#))

| #  | b                  | b <sup>++</sup> | b*          | b <sup>*++</sup> | b <sup>0</sup>    | b <sup>0++</sup> | Seq. | y                  | y <sup>++</sup>   | y*                | y <sup>*++</sup> | y <sup>0</sup> | y <sup>0++</sup> | #  |
|----|--------------------|-----------------|-------------|------------------|-------------------|------------------|------|--------------------|-------------------|-------------------|------------------|----------------|------------------|----|
| 1  | 72.044390          | 36.525833       |             |                  |                   |                  | A    |                    |                   |                   |                  |                |                  | 12 |
| 2  | 173.092069         | 87.049672       |             |                  | 155.081504        | 78.044390        | T    | 1240.714731        | 620.861004        | 1223.688182       | 612.347729       | 1222.704166    | 611.855721       | 11 |
| 3  | <b>286.176133</b>  | 143.591704      |             |                  | <b>268.165568</b> | 134.586422       | L    | 1139.667052        | <b>570.337164</b> | 1122.640503       | 561.823890       | 1121.656487    | 561.331882       | 10 |
| 4  | 399.260197         | 200.133737      |             |                  | 381.249632        | 191.128454       | L    | <b>1026.582988</b> | 513.795132        | 1009.556439       | 505.281858       | 1008.572423    | 504.789850       | 9  |
| 5  | 528.302790         | 264.655033      |             |                  | 510.292225        | 255.649751       | E    | <b>913.498924</b>  | 457.253100        | 896.472375        | 448.739825       | 895.488359     | 448.247818       | 8  |
| 6  | 657.345383         | 329.176330      |             |                  | 639.334818        | 320.171047       | E    | <b>784.456331</b>  | 392.731804        | 767.429782        | 384.218529       | 766.445766     | 383.726521       | 7  |
| 7  | <b>785.403961</b>  | 393.205619      | 768.377412  | 384.692344       | 767.393396        | 384.200336       | Q    | 655.413738         | 328.210507        | <b>638.387189</b> | 319.697232       |                |                  | 6  |
| 8  | <b>898.488025</b>  | 449.747651      | 881.461476  | 441.234376       | <b>880.477460</b> | 440.742368       | L    | <b>527.355160</b>  | 264.181218        | 510.328611        | 255.667943       |                |                  | 5  |
| 9  | 995.540789         | 498.274033      | 978.514240  | 489.760758       | 977.530224        | 489.268750       | P    | <b>414.271096</b>  | 207.639186        | 397.244547        | 199.125911       |                |                  | 4  |
| 10 | <b>1108.624853</b> | 554.816065      | 1091.598304 | 546.302790       | 1090.614288       | 545.810782       | L    | <b>317.218332</b>  | 159.112804        | 300.191783        | 150.599529       |                |                  | 3  |
| 11 | <b>1165.646317</b> | 583.326797      | 1148.619768 | 574.813522       | 1147.635752       | 574.321514       | G    | <b>204.134268</b>  | 102.570772        | 187.107719        | 94.057497        |                |                  | 2  |
| 12 |                    |                 |             |                  |                   |                  | K    | 147.112804         | 74.060040         | 130.086255        | 65.546765        |                |                  | 1  |

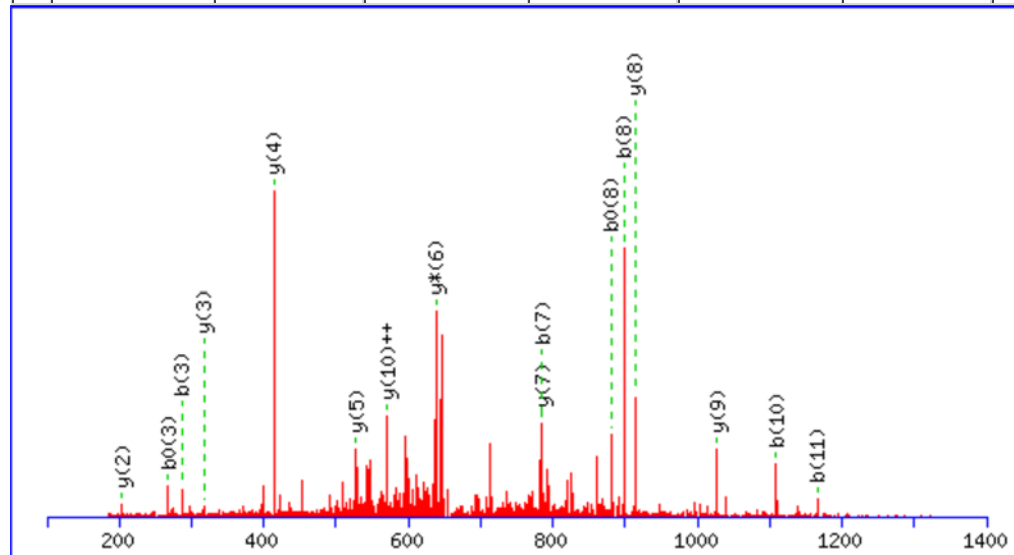

## Peptide View

MS/MS Fragmentation of **EVQLVESGGGLVKGK**

Found in **IPI00783024**, Tax\_Id=9606 Gene\_Symbol=- Myosin-reactive immunoglobulin heavy chain variable region (Fragment)

**Experiment:** 53 - PyC-2 **Fraction:** PyC-2

Match to Query 14931: 1881.032648 from(941.523600,2+)

Title: OECHL100312\_17.14043.14043.2.dta

Data file \\Boromir\masse\Data LTQ-Orbitrap\Chrystelle Lacroix\Etude clinique sJPU\OECHL100312\_17.raw

**Monoisotopic mass of neutral peptide Mr(calc):** 1881.031982 **Fixed modifications:** Carbamidomethyl (C) (apply to specified residues or termini only) **Ions Score:** 108

**Expect:** 7.6e-010 **Matches :** 50/208 fragment ions using 59 most intense peaks ([help](#))

| #  | b           | b <sup>++</sup> | b*          | b <sup>*++</sup> | b <sup>0</sup> | b <sup>0++</sup> | Seq. | y           | y <sup>++</sup> | y*          | y <sup>*++</sup> | y <sup>0</sup> | y <sup>0++</sup> | #  |
|----|-------------|-----------------|-------------|------------------|----------------|------------------|------|-------------|-----------------|-------------|------------------|----------------|------------------|----|
| 1  | 130.049869  | 65.528572       |             |                  | 112.039304     | 56.523290        | E    |             |                 |             |                  |                |                  | 19 |
| 2  | 229.118283  | 115.062780      |             |                  | 211.107718     | 106.057497       | V    | 1752.996660 | 877.001968      | 1735.970111 | 868.488694       | 1734.986095    | 867.996686       | 18 |
| 3  | 357.176861  | 179.092069      | 340.150312  | 170.578794       | 339.166296     | 170.086786       | Q    | 1653.928246 | 827.467761      | 1636.901697 | 818.954487       | 1635.917681    | 818.462479       | 17 |
| 4  | 470.260925  | 235.634101      | 453.234376  | 227.120826       | 452.250360     | 226.628818       | L    | 1525.869668 | 763.438472      | 1508.843119 | 754.925198       | 1507.859103    | 754.433190       | 16 |
| 5  | 569.329339  | 285.168308      | 552.302790  | 276.655033       | 551.318774     | 276.163025       | V    | 1412.785604 | 706.896440      | 1395.759055 | 698.383166       | 1394.775039    | 697.891158       | 15 |
| 6  | 698.371932  | 349.689604      | 681.345383  | 341.176330       | 680.361367     | 340.684322       | E    | 1313.717190 | 657.362233      | 1296.690641 | 648.848959       | 1295.706625    | 648.356951       | 14 |
| 7  | 785.403960  | 393.205618      | 768.377411  | 384.692344       | 767.393395     | 384.200336       | S    | 1184.674597 | 592.840937      | 1167.648048 | 584.327662       | 1166.664032    | 583.835654       | 13 |
| 8  | 842.425424  | 421.716350      | 825.398875  | 413.203076       | 824.414859     | 412.711068       | G    | 1097.642569 | 549.324923      | 1080.616020 | 540.811648       | 1079.632004    | 540.319640       | 12 |
| 9  | 899.446888  | 450.227082      | 882.420339  | 441.713808       | 881.436323     | 441.221800       | G    | 1040.621105 | 520.814191      | 1023.594556 | 512.300916       | 1022.610540    | 511.808908       | 11 |
| 10 | 956.468352  | 478.737814      | 939.441803  | 470.224540       | 938.457787     | 469.732532       | G    | 983.599641  | 492.303459      | 966.573092  | 483.790184       | 965.589076     | 483.298176       | 10 |
| 11 | 1069.552416 | 535.279846      | 1052.525867 | 526.766572       | 1051.541851    | 526.274564       | L    | 926.578177  | 463.792727      | 909.551628  | 455.279452       | 908.567612     | 454.787444       | 9  |
| 12 | 1168.620830 | 584.814053      | 1151.594281 | 576.300779       | 1150.610265    | 575.808771       | V    | 813.494113  | 407.250695      | 796.467564  | 398.737420       | 795.483548     | 398.245412       | 8  |
| 13 | 1296.715793 | 648.861535      | 1279.689244 | 640.348260       | 1278.705228    | 639.856252       | K    | 714.425699  | 357.716487      | 697.399150  | 349.203213       | 696.415134     | 348.711205       | 7  |
| 14 | 1393.768557 | 697.387917      | 1376.742008 | 688.874642       | 1375.757992    | 688.382634       | P    | 586.330736  | 293.669006      | 569.304187  | 285.155731       | 568.320171     | 284.663723       | 6  |
| 15 | 1450.790021 | 725.898649      | 1433.763472 | 717.385374       | 1432.779456    | 716.893366       | G    | 489.277972  | 245.142624      | 472.251423  | 236.629349       | 471.267407     | 236.137341       | 5  |
| 16 | 1507.811485 | 754.409381      | 1490.784936 | 745.896106       | 1489.800920    | 745.404098       | G    | 432.256508  | 216.631892      | 415.229959  | 208.118617       | 414.245943     | 207.626609       | 4  |
| 17 | 1594.843513 | 797.925395      | 1577.816964 | 789.412120       | 1576.832948    | 788.920112       | S    | 375.235044  | 188.121160      | 358.208495  | 179.607885       | 357.224479     | 179.115877       | 3  |
| 18 | 1707.927577 | 854.467427      | 1690.901028 | 845.954152       | 1689.917012    | 845.462144       | L    | 288.203016  | 144.605146      | 271.176467  | 136.091871       |                |                  | 2  |
| 19 |             |                 |             |                  |                |                  | R    | 175.118952  | 88.063114       | 158.092403  | 79.549839        |                |                  | 1  |

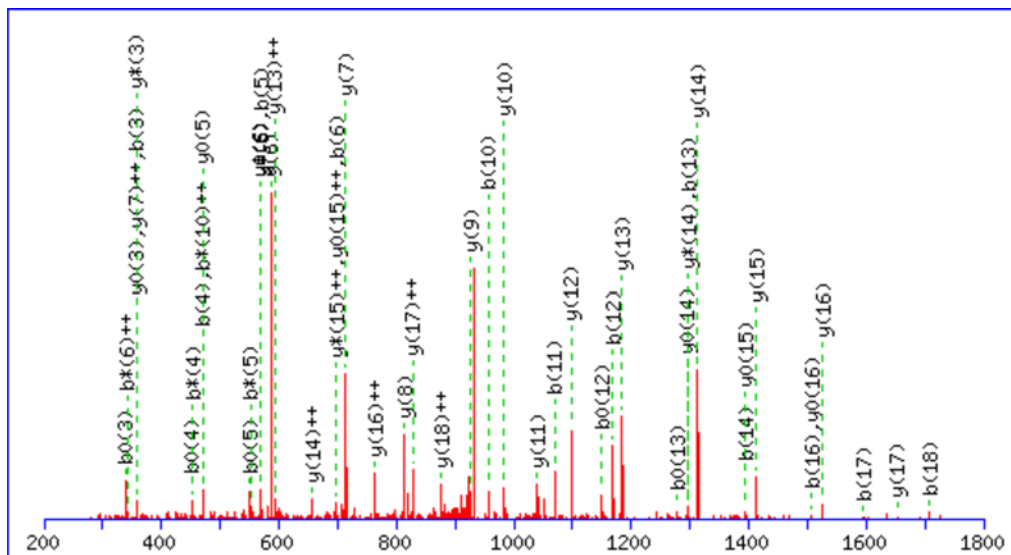

## Peptide View

MS/MS Fragmentation of **SYELTQPPSVSVSPGQTAR**

Found in **IPI00382440**, Tax\_Id=9606 Gene\_Symbol=- Ig lambda chain V-IV region Hil

**Experiment:** 53 - PyC-2 **Fraction:** PyC-2

Match to Query 15603: 2002.997448 from(1002.506000,2+)

Title: OECHL100312\_17.13507.13507.2.dta

Data file \\Boromir\masse\Data LTQ-Orbitrap\Chrystelle Lacroix\Etude clinique sJPU\OECHL100312\_17.raw

**Monoisotopic mass of neutral peptide Mr(calc):** 2002.995987 **Fixed modifications:** Carbamidomethyl (C) (apply to specified residues or termini only) **Ions Score:** 70

**Expect:** 1.9e-005 **Matches :** 36/202 fragment ions using 50 most intense peaks ([help](#))

| # | b                 | b <sup>++</sup> | b*         | b* <sup>++</sup> | b <sup>0</sup>    | b <sup>0++</sup> | Seq. | y                  | y <sup>++</sup>   | y*                 | y* <sup>++</sup> | y <sup>0</sup> | y <sup>0++</sup> | #  |
|---|-------------------|-----------------|------------|------------------|-------------------|------------------|------|--------------------|-------------------|--------------------|------------------|----------------|------------------|----|
| 1 | 88.039304         | 44.523290       |            |                  | 70.028739         | 35.518008        | S    |                    |                   |                    |                  |                |                  | 19 |
| 2 | 251.102633        | 126.054954      |            |                  | 233.092068        | 117.049672       | Y    | 1916.971234        | 958.989255        | 1899.944685        | 950.475981       | 1898.960669    | 949.983973       | 18 |
| 3 | <b>380.145226</b> | 190.576251      |            |                  | <b>362.134661</b> | 181.570969       | E    | 1753.907905        | 877.457591        | 1736.881356        | 868.944316       | 1735.897340    | 868.452308       | 17 |
| 4 | <b>493.229290</b> | 247.118283      |            |                  | <b>475.218725</b> | 238.113001       | L    | 1624.865312        | <b>812.936294</b> | 1607.838763        | 804.423020       | 1606.854747    | 803.931012       | 16 |
| 5 | <b>594.276969</b> | 297.642123      |            |                  | <b>576.266404</b> | 288.636840       | T    | <b>1511.781248</b> | 756.394262        | 1494.754699        | 747.880988       | 1493.770683    | 747.388980       | 15 |
| 6 | <b>722.335547</b> | 361.671412      | 705.308998 | 353.158137       | <b>704.324982</b> | 352.666129       | Q    | <b>1410.733569</b> | 705.870423        | <b>1393.707020</b> | 697.357148       | 1392.723004    | 696.865140       | 14 |

|    |             |            |             |            |             |            |   |             |            |             |            |             |            |    |
|----|-------------|------------|-------------|------------|-------------|------------|---|-------------|------------|-------------|------------|-------------|------------|----|
| 7  | 819.388311  | 410.197794 | 802.361762  | 401.684519 | 801.377746  | 401.192511 | P | 1282.674991 | 641.841134 | 1265.648442 | 633.327859 | 1264.664426 | 632.835851 | 13 |
| 8  | 916.441075  | 458.724176 | 899.414526  | 450.210901 | 898.430510  | 449.718893 | P | 1185.622227 | 593.314752 | 1168.595678 | 584.801477 | 1167.611662 | 584.309469 | 12 |
| 9  | 1003.473103 | 502.240190 | 986.446554  | 493.726915 | 985.462538  | 493.234907 | S | 1088.569463 | 544.788370 | 1071.542914 | 536.275095 | 1070.558898 | 535.783087 | 11 |
| 10 | 1102.541517 | 551.774397 | 1085.514968 | 543.261122 | 1084.530952 | 542.769114 | V | 1001.537435 | 501.272356 | 984.510886  | 492.759081 | 983.526870  | 492.267073 | 10 |
| 11 | 1189.573545 | 595.290411 | 1172.546996 | 586.777136 | 1171.562980 | 586.285128 | S | 902.469021  | 451.738149 | 885.442472  | 443.224874 | 884.458456  | 442.732866 | 9  |
| 12 | 1288.641959 | 644.824618 | 1271.615410 | 636.311343 | 1270.631394 | 635.819335 | V | 815.436993  | 408.222135 | 798.410444  | 399.708860 | 797.426428  | 399.216852 | 8  |
| 13 | 1375.673987 | 688.340632 | 1358.647438 | 679.827357 | 1357.663422 | 679.335349 | S | 716.368579  | 358.687928 | 699.342030  | 350.174653 | 698.358014  | 349.682645 | 7  |
| 14 | 1472.726751 | 736.867014 | 1455.700202 | 728.353739 | 1454.716186 | 727.861731 | P | 629.336551  | 315.171914 | 612.310002  | 306.658639 | 611.325986  | 306.166631 | 6  |
| 15 | 1529.748215 | 765.377746 | 1512.721666 | 756.864471 | 1511.737650 | 756.372463 | G | 532.283787  | 266.645532 | 515.257238  | 258.132257 | 514.273222  | 257.640249 | 5  |
| 16 | 1657.806793 | 829.407035 | 1640.780244 | 820.893760 | 1639.796228 | 820.401752 | Q | 475.262323  | 238.134800 | 458.235774  | 229.621525 | 457.251758  | 229.129517 | 4  |
| 17 | 1758.854472 | 879.930874 | 1741.827923 | 871.417600 | 1740.843907 | 870.925592 | T | 347.203745  | 174.105510 | 330.177196  | 165.592236 | 329.193180  | 165.100228 | 3  |
| 18 | 1829.891586 | 915.449431 | 1812.865037 | 906.936157 | 1811.881021 | 906.444149 | A | 246.156066  | 123.581671 | 229.129517  | 115.068396 |             |            | 2  |
| 19 |             |            |             |            |             |            | R | 175.118952  | 88.063114  | 158.092403  | 79.549839  |             |            | 1  |

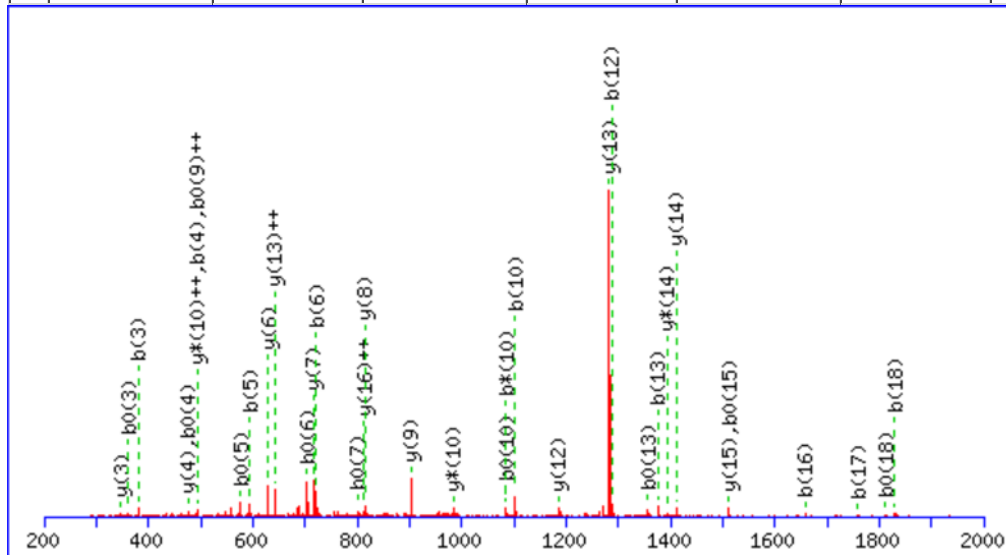

## Peptide View

MS/MS Fragmentation of **EIVLTQSPATLSLSPGER**

Found in **IPI00816799**, Tax\_Id=9606 Gene\_Symbol=- Rheumatoid factor D5 light chain (Fragment)

**Experiment:** 53 - PyC-2 **Fraction:** PyC-2

Match to Query 15027: 1897.016448 from(949.515500,2+)

Title: OECHL100312\_17.17260.17260.2.dta

Data file \\Boromir\masse\Data LTQ-Orbitrap\Chrystelle Lacroix\Etude clinique sJPU\OECHL100312\_17.raw

**Monoisotopic mass of neutral peptide Mr(calc):** 1897.015640**Fixed modifications:** Carbamidomethyl (C) (apply to specified residues or termini only)**Ions Score:** 96

**Expect:** 2.1e-008**Matches :** 26/192 fragment ions using 30 most intense peaks ([help](#))

| #  | b                  | b <sup>++</sup>   | b <sup>*</sup>     | b <sup>*++</sup> | b <sup>0</sup>     | b <sup>0++</sup> | Seq. | y                  | y <sup>++</sup>   | y <sup>*</sup>     | y <sup>*++</sup> | y <sup>0</sup> | y <sup>0++</sup> | #  |
|----|--------------------|-------------------|--------------------|------------------|--------------------|------------------|------|--------------------|-------------------|--------------------|------------------|----------------|------------------|----|
| 1  | 130.049869         | 65.528572         |                    |                  | 112.039304         | 56.523290        | E    |                    |                   |                    |                  |                |                  | 18 |
| 2  | 243.133933         | 122.070605        |                    |                  | 225.123368         | 113.065322       | I    | 1768.980341        | 884.993808        | 1751.953792        | 876.480534       | 1750.969776    | 875.988526       | 17 |
| 3  | <b>342.202347</b>  | 171.604812        |                    |                  | 324.191782         | 162.599529       | V    | 1655.896277        | 828.451776        | 1638.869728        | 819.938502       | 1637.885712    | 819.446494       | 16 |
| 4  | <b>455.286411</b>  | 228.146844        |                    |                  | 437.275846         | 219.141561       | L    | <b>1556.827863</b> | <b>778.917569</b> | <b>1539.801314</b> | 770.404295       | 1538.817298    | 769.912287       | 15 |
| 5  | 556.334090         | 278.670683        |                    |                  | <b>538.323525</b>  | 269.665401       | T    | <b>1443.743799</b> | 722.375537        | 1426.717250        | 713.862263       | 1425.733234    | 713.370255       | 14 |
| 6  | 684.392668         | <b>342.699972</b> | 667.366119         | 334.186698       | <b>666.382103</b>  | 333.694690       | Q    | 1342.696120        | 671.851698        | 1325.669571        | 663.338423       | 1324.685555    | 662.846415       | 13 |
| 7  | <b>771.424696</b>  | 386.215986        | 754.398147         | 377.702712       | 753.414131         | 377.210704       | S    | <b>1214.637542</b> | 607.822409        | 1197.610993        | 599.309134       | 1196.626977    | 598.817126       | 12 |
| 8  | 868.477460         | 434.742368        | 851.450911         | 426.229094       | 850.466895         | 425.737086       | P    | <b>1127.605514</b> | 564.306395        | 1110.578965        | 555.793120       | 1109.594949    | 555.301112       | 11 |
| 9  | 939.514574         | 470.260925        | 922.488025         | 461.747651       | 921.504009         | 461.255643       | A    | <b>1030.552750</b> | 515.780013        | 1013.526201        | 507.266738       | 1012.542185    | 506.774730       | 10 |
| 10 | <b>1040.562253</b> | 520.784765        | 1023.535704        | 512.271490       | 1022.551688        | 511.779482       | T    | <b>959.515636</b>  | 480.261456        | 942.489087         | 471.748181       | 941.505071     | 471.256173       | 9  |
| 11 | <b>1153.646317</b> | 577.326797        | 1136.619768        | 568.813522       | 1135.635752        | 568.321514       | L    | <b>858.467957</b>  | 429.737616        | 841.441408         | 421.224342       | 840.457392     | 420.732334       | 8  |
| 12 | 1240.678345        | 620.842811        | 1223.651796        | 612.329536       | 1222.667780        | 611.837528       | S    | <b>745.383893</b>  | 373.195585        | 728.357344         | 364.682310       | 727.373328     | 364.190302       | 7  |
| 13 | <b>1353.762409</b> | 677.384842        | 1336.735860        | 668.871568       | <b>1335.751844</b> | 668.379560       | L    | <b>658.351865</b>  | 329.679570        | 641.325316         | 321.166296       | 640.341300     | 320.674288       | 6  |
| 14 | <b>1440.794437</b> | 720.900857        | 1423.767888        | 712.387582       | 1422.783872        | 711.895574       | S    | <b>545.267801</b>  | 273.137539        | 528.241252         | 264.624264       | 527.257236     | 264.132256       | 5  |
| 15 | 1537.847201        | 769.427239        | 1520.820652        | 760.913964       | 1519.836636        | 760.421956       | P    | <b>458.235773</b>  | 229.621524        | 441.209224         | 221.108250       | 440.225208     | 220.616242       | 4  |
| 16 | 1594.868665        | 797.937971        | 1577.842116        | 789.424696       | 1576.858100        | 788.932688       | G    | 361.183009         | 181.095142        | 344.156460         | 172.581868       | 343.172444     | 172.089860       | 3  |
| 17 | <b>1723.911258</b> | 862.459267        | <b>1706.884709</b> | 853.945992       | 1705.900693        | 853.453984       | E    | 304.161545         | 152.584410        | 287.134996         | 144.071136       | 286.150980     | 143.579128       | 2  |
| 18 |                    |                   |                    |                  |                    |                  | R    | 175.118952         | 88.063114         | 158.092403         | 79.549839        |                |                  | 1  |



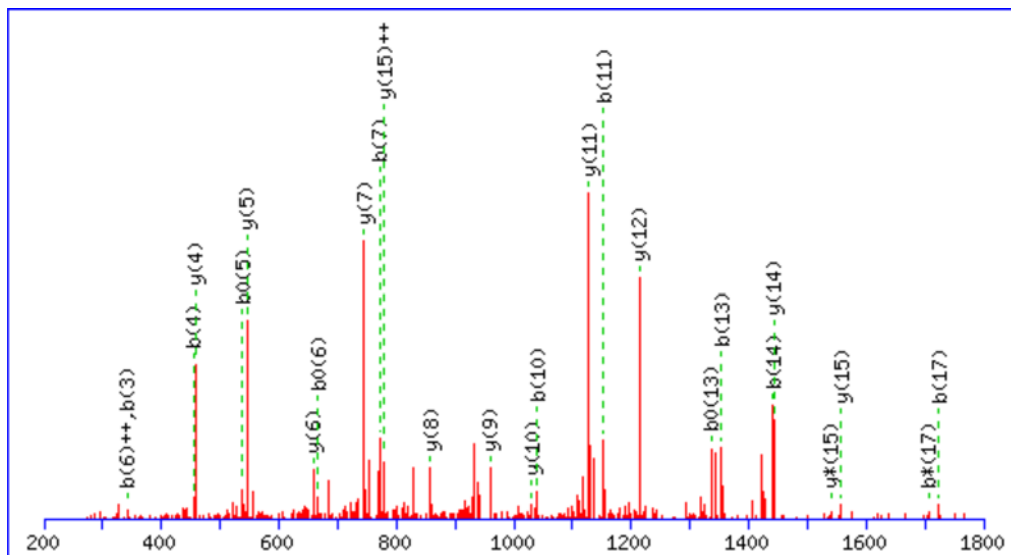

## Peptide View

MS/MS Fragmentation of **WDAECEEIPGR**

Found in **IPI00027436**, Tax\_Id=9606 Gene\_Symbol=NGFR Tumor necrosis factor receptor superfamily member 16

**Experiment:** 53 - PyC-2 **Fraction:** PyC-2

Match to Query 10298: 1431.608848 from(716.811700,2+)

Title: OECHL100312\_17.11280.11280.2.dta

Data file \\Boromir\masse\Data LTQ-Orbitrap\Chrystelle Lacroix\Etude clinique sJPU\OECHL100312\_17.raw

**Monoisotopic mass of neutral peptide Mr(calc):** 1431.608856 **Fixed modifications:** Carbamidomethyl (C) (apply to specified residues or termini only) **Ions Score:** 74

**Expect:** 9.2e-007 **Matches :** 19/98 fragment ions using 36 most intense peaks ([help](#))

| # | b                 | b <sup>++</sup> | b <sup>0</sup> | b <sup>0++</sup> | Seq. | y                  | y <sup>++</sup> | y <sup>*</sup> | y <sup>*++</sup> | y <sup>0</sup> | y <sup>0++</sup> | #  |
|---|-------------------|-----------------|----------------|------------------|------|--------------------|-----------------|----------------|------------------|----------------|------------------|----|
| 1 | 187.086589        | 94.046932       |                |                  | W    |                    |                 |                |                  |                |                  | 12 |
| 2 | <b>258.123703</b> | 129.565490      |                |                  | A    | <b>1246.536843</b> | 623.772060      | 1229.510294    | 615.258785       | 1228.526278    | 614.766777       | 11 |
| 3 | <b>373.150646</b> | 187.078961      | 355.140081     | 178.073679       | D    | <b>1175.499729</b> | 588.253502      | 1158.473180    | 579.740228       | 1157.489164    | 579.248220       | 10 |
| 4 | <b>444.187760</b> | 222.597518      | 426.177195     | 213.592236       | A    | <b>1060.472786</b> | 530.740031      | 1043.446237    | 522.226757       | 1042.462221    | 521.734749       | 9  |
| 5 | <b>573.230353</b> | 287.118815      | 555.219788     | 278.113532       | E    | <b>989.435672</b>  | 495.221474      | 972.409123     | 486.708199       | 971.425107     | 486.216191       | 8  |
| 6 | 733.261002        | 367.134139      | 715.250437     | 358.128857       | C    | <b>860.393079</b>  | 430.700178      | 843.366530     | 422.186903       | 842.382514     | 421.694895       | 7  |

|    |                    |            |                    |            |          |                   |            |            |            |            |            |          |
|----|--------------------|------------|--------------------|------------|----------|-------------------|------------|------------|------------|------------|------------|----------|
| 7  | <b>862.303595</b>  | 431.655436 | 844.293030         | 422.650153 | <b>E</b> | <b>700.362430</b> | 350.684853 | 683.335881 | 342.171578 | 682.351865 | 341.679570 | <b>6</b> |
| 8  | <b>991.346188</b>  | 496.176732 | 973.335623         | 487.171450 | <b>E</b> | <b>571.319837</b> | 286.163556 | 554.293288 | 277.650282 | 553.309272 | 277.158274 | <b>5</b> |
| 9  | <b>1104.430252</b> | 552.718764 | <b>1086.419687</b> | 543.713482 | <b>I</b> | <b>442.277244</b> | 221.642260 | 425.250695 | 213.128985 |            |            | <b>4</b> |
| 10 | 1201.483016        | 601.245146 | 1183.472451        | 592.239864 | <b>P</b> | <b>329.193180</b> | 165.100228 | 312.166631 | 156.586953 |            |            | <b>3</b> |
| 11 | <b>1258.504480</b> | 629.755878 | 1240.493915        | 620.750596 | <b>G</b> | <b>232.140416</b> | 116.573846 | 215.113867 | 108.060571 |            |            | <b>2</b> |
| 12 |                    |            |                    |            | <b>R</b> | 175.118952        | 88.063114  | 158.092403 | 79.549839  |            |            | <b>1</b> |

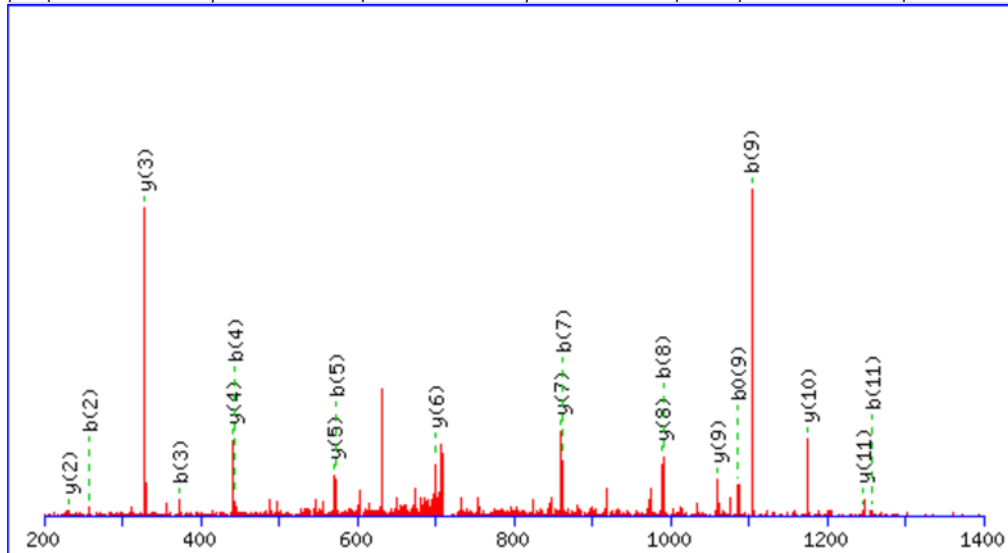

## Peptide View

MS/MS Fragmentation of **SCSSCVATDPDSIGAAHLIFCCFR**

Found in **IP100022620**, Tax\_Id=9606 Gene\_Symbol=SLURP1 Secreted Ly-6/uPAR-related protein 1

**Experiment:** 53 - PyC-2 **Fraction:** PyC-2

Match to Query 18984: 2817.204372 from(940.075400,3+)

Title: OECHL100312\_17.20065.20065.3.dta

Data file \\Boromir\masse\Data LTQ-Orbitrap\Chrystelle Lacroix\Etude clinique sJPU\OECHL100312\_17.raw

**Monoisotopic mass of neutral peptide Mr(calc):** 2817.197922 **Fixed modifications:** Carbamidomethyl (C) (apply to specified residues or termini only) **Ions Score:** 58

**Expect:** 9.7e-005 **Matches :** 23/216 fragment ions using 34 most intense peaks ([help](#))

| # | b | b <sup>++</sup> | b <sup>0</sup> | b <sup>0++</sup> | Seq. | y | y <sup>++</sup> | y <sup>*</sup> | y <sup>*++</sup> | y <sup>0</sup> | y <sup>0++</sup> | # |
|---|---|-----------------|----------------|------------------|------|---|-----------------|----------------|------------------|----------------|------------------|---|
|---|---|-----------------|----------------|------------------|------|---|-----------------|----------------|------------------|----------------|------------------|---|

|    |                    |                   |                   |             |   |                    |                    |                    |                   |                    |             |    |
|----|--------------------|-------------------|-------------------|-------------|---|--------------------|--------------------|--------------------|-------------------|--------------------|-------------|----|
| 1  | 88.039304          | 44.523290         | 70.028739         | 35.518008   | S |                    |                    |                    |                   |                    |             | 25 |
| 2  | 248.069953         | 124.538614        | 230.059388        | 115.533332  | C | 2731.173141        | 1366.090208        | 2714.146592        | 1357.576934       | 2713.162576        | 1357.084926 | 24 |
| 3  | <b>335.101981</b>  | 168.054628        | <b>317.091416</b> | 159.049346  | S | 2571.142492        | <b>1286.074884</b> | 2554.115943        | 1277.561609       | 2553.131927        | 1277.069601 | 23 |
| 4  | 422.134009         | 211.570642        | <b>404.123444</b> | 202.565360  | S | 2484.110464        | <b>1242.558870</b> | 2467.083915        | 1234.045595       | 2466.099899        | 1233.553587 | 22 |
| 5  | 509.166037         | 255.086656        | 491.155472        | 246.081374  | S | 2397.078436        | <b>1199.042856</b> | 2380.051887        | 1190.529581       | 2379.067871        | 1190.037573 | 21 |
| 6  | 669.196686         | <b>335.101981</b> | 651.186121        | 326.096699  | C | 2310.046408        | <b>1155.526842</b> | 2293.019859        | 1147.013567       | 2292.035843        | 1146.521559 | 20 |
| 7  | <b>768.265100</b>  | 384.636188        | 750.254535        | 375.630905  | V | 2150.015759        | <b>1075.511517</b> | 2132.989210        | 1066.998243       | 2132.005194        | 1066.506235 | 19 |
| 8  | 839.302214         | 420.154745        | 821.291649        | 411.149462  | A | 2050.947345        | <b>1025.977310</b> | 2033.920796        | 1017.464036       | 2032.936780        | 1016.972028 | 18 |
| 9  | 940.349893         | 470.678585        | 922.339328        | 461.673302  | T | <b>1979.910231</b> | <b>990.458753</b>  | 1962.883682        | 981.945479        | 1961.899666        | 981.453471  | 17 |
| 10 | 1055.376836        | 528.192056        | 1037.366271       | 519.186773  | D | <b>1878.862552</b> | 939.934914         | <b>1861.836003</b> | 931.421639        | <b>1860.851987</b> | 930.929631  | 16 |
| 11 | 1152.429600        | 576.718438        | 1134.419035       | 567.713155  | P | <b>1763.835609</b> | <b>882.421442</b>  | 1746.809060        | 873.908168        | 1745.825044        | 873.416160  | 15 |
| 12 | 1267.456543        | 634.231910        | 1249.445978       | 625.226627  | D | 1666.782845        | 833.895060         | 1649.756296        | 825.381786        | 1648.772280        | 824.889778  | 14 |
| 13 | 1354.488571        | 677.747924        | 1336.478006       | 668.742641  | S | 1551.755902        | <b>776.381589</b>  | 1534.729353        | 767.868314        | 1533.745337        | 767.376306  | 13 |
| 14 | 1467.572635        | 734.289956        | 1449.562070       | 725.284673  | I | 1464.723874        | 732.865575         | 1447.697325        | 724.352300        |                    |             | 12 |
| 15 | 1524.594099        | 762.800687        | 1506.583534       | 753.795405  | G | 1351.639810        | <b>676.323543</b>  | 1334.613261        | 667.810268        |                    |             | 11 |
| 16 | <b>1595.631213</b> | 798.319244        | 1577.620648       | 789.313962  | A | 1294.618346        | 647.812811         | 1277.591797        | 639.299536        |                    |             | 10 |
| 17 | 1666.668327        | 833.837801        | 1648.657762       | 824.832519  | A | 1223.581232        | 612.294254         | 1206.554683        | 603.780979        |                    |             | 9  |
| 18 | 1803.727239        | 902.367257        | 1785.716674       | 893.361975  | H | 1152.544118        | 576.775697         | 1135.517569        | 568.262422        |                    |             | 8  |
| 19 | 1916.811303        | 958.909289        | 1898.800738       | 949.904007  | L | 1015.485206        | 508.246241         | 998.458657         | 499.732966        |                    |             | 7  |
| 20 | 2029.895367        | 1015.451321       | 2011.884802       | 1006.446039 | I | 902.401142         | 451.704209         | 885.374593         | 443.190934        |                    |             | 6  |
| 21 | 2176.963781        | 1088.985528       | 2158.953216       | 1079.980246 | F | 789.317078         | 395.162177         | 772.290529         | <b>386.648902</b> |                    |             | 5  |
| 22 | 2336.994430        | 1169.000853       | 2318.983865       | 1159.995570 | C | 642.248664         | 321.627970         | 625.222115         | 313.114695        |                    |             | 4  |
| 23 | 2497.025079        | 1249.016177       | 2479.014514       | 1240.010895 | C | <b>482.218015</b>  | 241.612645         | 465.191466         | 233.099371        |                    |             | 3  |
| 24 | 2644.093493        | 1322.550384       | 2626.082928       | 1313.545102 | F | 322.187366         | 161.597321         | 305.160817         | 153.084046        |                    |             | 2  |
| 25 |                    |                   |                   |             | R | 175.118952         | 88.063114          | 158.092403         | 79.549839         |                    |             | 1  |

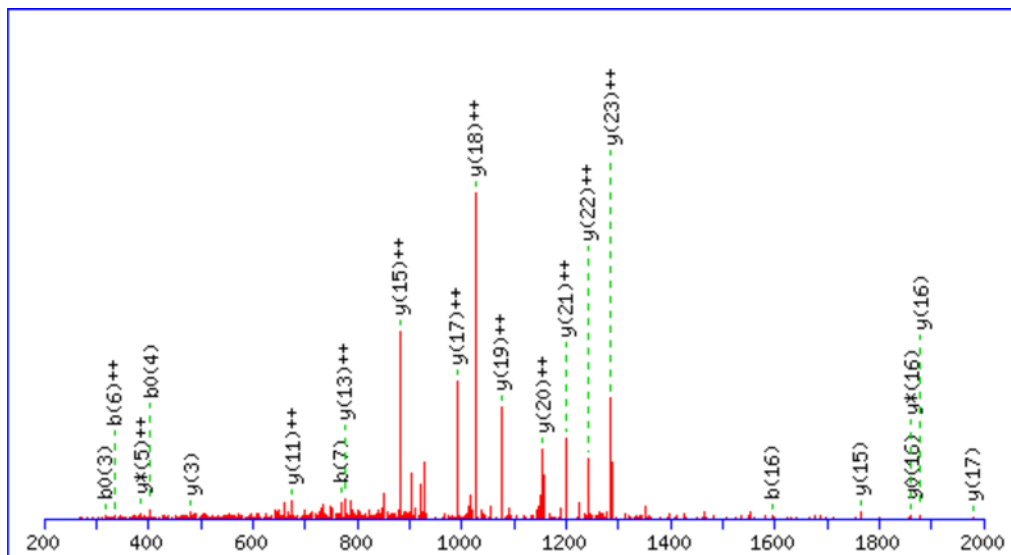

## Peptide View

MS/MS Fragmentation of **AISSIGLECQSVTSR**

Found in **IPI00006988**, Tax\_Id=9606 Gene\_Symbol=RETN Resistin

**Experiment:** 53 - PyC-2 **Fraction:** PyC-2

Match to Query 12515: 1606.799448 from(804.407000,2+)

Title: OECHL100312\_17.12166.12166.2.dta

Data file \\Boromir\masse\Data LTQ-Orbitrap\Chrystelle Lacroix\Etude clinique sJPU\OECHL100312\_17.raw

**Monoisotopic mass of neutral peptide Mr(calc):** 1606.798462 **Fixed modifications:** Carbamidomethyl (C) (apply to specified residues or termini only) **Ions Score:** 96

**Expect:** 3.7e-008 **Matches :** 34/144 fragment ions using 54 most intense peaks ([help](#))

| # | b                 | b <sup>++</sup> | b* | b <sup>*++</sup> | b <sup>0</sup>    | b <sup>0++</sup> | Seq. | y                  | y <sup>++</sup>   | y*                 | y <sup>*++</sup> | y <sup>0</sup> | y <sup>0++</sup> | #  |
|---|-------------------|-----------------|----|------------------|-------------------|------------------|------|--------------------|-------------------|--------------------|------------------|----------------|------------------|----|
| 1 | 72.044390         | 36.525833       |    |                  |                   |                  | A    |                    |                   |                    |                  |                |                  | 15 |
| 2 | 185.128454        | 93.067865       |    |                  |                   |                  | I    | 1536.768633        | 768.887955        | 1519.742084        | 760.374680       | 1518.758068    | 759.882672       | 14 |
| 3 | 272.160482        | 136.583879      |    |                  | 254.149917        | 127.578596       | S    | <b>1423.684569</b> | <b>712.345923</b> | 1406.658020        | 703.832648       | 1405.674004    | 703.340640       | 13 |
| 4 | <b>359.192510</b> | 180.099893      |    |                  | <b>341.181945</b> | 171.094610       | S    | <b>1336.652541</b> | <b>668.829909</b> | 1319.625992        | 660.316634       | 1318.641976    | 659.824626       | 12 |
| 5 | 472.276574        | 236.641925      |    |                  | <b>454.266009</b> | 227.636642       | I    | <b>1249.620513</b> | <b>625.313895</b> | 1232.593964        | 616.800620       | 1231.609948    | 616.308612       | 11 |
| 6 | 529.298038        | 265.152657      |    |                  | <b>511.287473</b> | 256.147375       | G    | <b>1136.536449</b> | 568.771863        | <b>1119.509900</b> | 560.258588       | 1118.525884    | 559.766580       | 10 |

|    |                    |            |             |            |                    |                   |          |                    |            |                   |            |                   |            |          |
|----|--------------------|------------|-------------|------------|--------------------|-------------------|----------|--------------------|------------|-------------------|------------|-------------------|------------|----------|
| 7  | <b>642.382102</b>  | 321.694689 |             |            | <b>624.371537</b>  | <b>312.689407</b> | <b>L</b> | <b>1079.514985</b> | 540.261131 | 1062.488436       | 531.747856 | 1061.504420       | 531.255848 | <b>9</b> |
| 8  | <b>771.424695</b>  | 386.215986 |             |            | 753.414130         | 377.210703        | <b>E</b> | <b>966.430921</b>  | 483.719099 | <b>949.404372</b> | 475.205824 | 948.420356        | 474.713816 | <b>8</b> |
| 9  | <b>931.455344</b>  | 466.231310 |             |            | 913.444779         | 457.226028        | <b>C</b> | <b>837.388328</b>  | 419.197802 | 820.361779        | 410.684528 | 819.377763        | 410.192520 | <b>7</b> |
| 10 | <b>1059.513922</b> | 530.260599 | 1042.487373 | 521.747325 | 1041.503357        | 521.255317        | <b>Q</b> | <b>677.357679</b>  | 339.182478 | 660.331130        | 330.669203 | 659.347114        | 330.177195 | <b>6</b> |
| 11 | <b>1146.545950</b> | 573.776613 | 1129.519401 | 565.263339 | 1128.535385        | 564.771331        | <b>S</b> | <b>549.299101</b>  | 275.153189 | 532.272552        | 266.639914 | 531.288536        | 266.147906 | <b>5</b> |
| 12 | <b>1245.614364</b> | 623.310820 | 1228.587815 | 614.797546 | <b>1227.603799</b> | 614.305538        | <b>V</b> | <b>462.267073</b>  | 231.637175 | 445.240524        | 223.123900 | <b>444.256508</b> | 222.631892 | <b>4</b> |
| 13 | <b>1346.662043</b> | 673.834660 | 1329.635494 | 665.321385 | <b>1328.651478</b> | 664.829377        | <b>T</b> | <b>363.198659</b>  | 182.102968 | 346.172110        | 173.589693 | 345.188094        | 173.097685 | <b>3</b> |
| 14 | <b>1433.694071</b> | 717.350674 | 1416.667522 | 708.837399 | 1415.683506        | 708.345391        | <b>S</b> | <b>262.150980</b>  | 131.579128 | 245.124431        | 123.065854 | 244.140415        | 122.573846 | <b>2</b> |
| 15 |                    |            |             |            |                    |                   | <b>R</b> | 175.118952         | 88.063114  | 158.092403        | 79.549839  |                   |            | <b>1</b> |

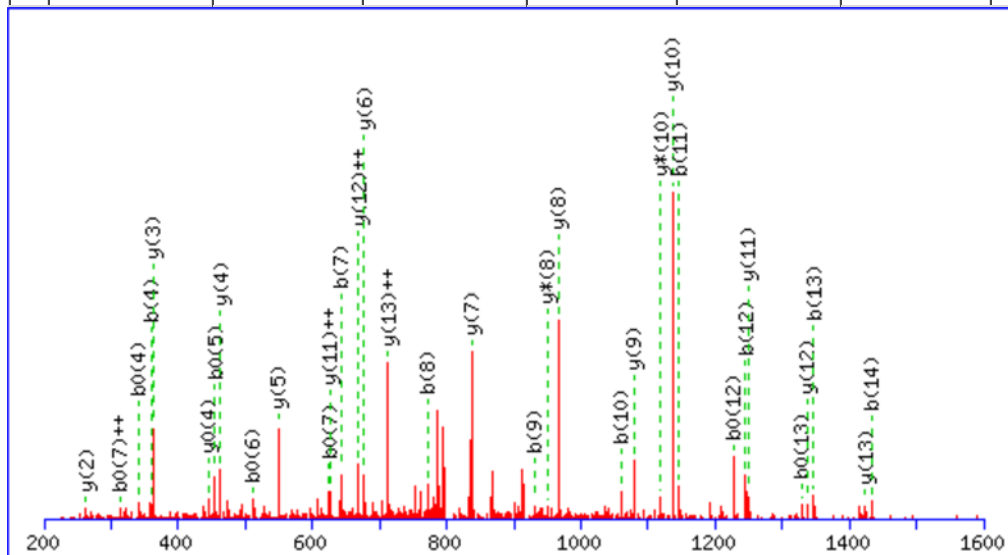

## Peptide View

MS/MS Fragmentation of **VFDKDGNGYISAAELR**

Found in **IP100075248**, Tax\_Id=9606 Gene\_Symbol=CALM3;CALM2;CALM1 Calmodulin

**Experiment:** 53 - PyC-2 **Fraction:** PyC-2

Match to Query 14160: 1753.864448 from(877.939500,2+)

Title: OECHL100312\_17.13880.13880.2.dta

Data file \\Boromir\masse\Data LTQ-Orbitrap\Chrystelle Lacroix\Etude clinique sJPU\OECHL100312\_17.raw

**Monoisotopic mass of neutral peptide Mr(calc):** 1753.863495**Fixed modifications:** Carbamidomethyl (C) (apply to specified residues or termini only)**Ions Score:** 81  
**Expect:** 1.1e-006**Matches :** 40/166 fragment ions using 73 most intense peaks ([help](#))

| #  | b           | b <sup>++</sup> | b*          | b <sup>*++</sup> | b <sup>0</sup> | b <sup>0++</sup> | Seq. | y           | y <sup>++</sup> | y*          | y <sup>*++</sup> | y <sup>0</sup> | y <sup>0++</sup> | #  |
|----|-------------|-----------------|-------------|------------------|----------------|------------------|------|-------------|-----------------|-------------|------------------|----------------|------------------|----|
| 1  | 100.075690  | 50.541483       |             |                  |                |                  | V    |             |                 |             |                  |                |                  | 16 |
| 2  | 247.144104  | 124.075690      |             |                  |                |                  | F    | 1655.802376 | 828.404826      | 1638.775827 | 819.891551       | 1637.791811    | 819.399543       | 15 |
| 3  | 362.171047  | 181.589161      |             |                  | 344.160482     | 172.583879       | D    | 1508.733962 | 754.870619      | 1491.707413 | 746.357345       | 1490.723397    | 745.865337       | 14 |
| 4  | 490.266010  | 245.636643      | 473.239461  | 237.123369       | 472.255445     | 236.631361       | K    | 1393.707019 | 697.357148      | 1376.680470 | 688.843873       | 1375.696454    | 688.351865       | 13 |
| 5  | 605.292953  | 303.150115      | 588.266404  | 294.636840       | 587.282388     | 294.144832       | D    | 1265.612056 | 633.309666      | 1248.585507 | 624.796392       | 1247.601491    | 624.304383       | 12 |
| 6  | 662.314417  | 331.660847      | 645.287868  | 323.147572       | 644.303852     | 322.655564       | G    | 1150.585113 | 575.796194      | 1133.558564 | 567.282920       | 1132.574548    | 566.790912       | 11 |
| 7  | 776.357344  | 388.682310      | 759.330795  | 380.169036       | 758.346779     | 379.677028       | N    | 1093.563649 | 547.285462      | 1076.537100 | 538.772188       | 1075.553084    | 538.280180       | 10 |
| 8  | 833.378808  | 417.193042      | 816.352259  | 408.679768       | 815.368243     | 408.187760       | G    | 979.520722  | 490.263999      | 962.494173  | 481.750724       | 961.510157     | 481.258716       | 9  |
| 9  | 996.442137  | 498.724707      | 979.415588  | 490.211432       | 978.431572     | 489.719424       | Y    | 922.499258  | 461.753267      | 905.472709  | 453.239992       | 904.488693     | 452.747984       | 8  |
| 10 | 1109.526201 | 555.266738      | 1092.499652 | 546.753464       | 1091.515636    | 546.261456       | I    | 759.435929  | 380.221603      | 742.409380  | 371.708328       | 741.425364     | 371.216320       | 7  |
| 11 | 1196.558229 | 598.782753      | 1179.531680 | 590.269478       | 1178.547664    | 589.777470       | S    | 646.351865  | 323.679571      | 629.325316  | 315.166296       | 628.341300     | 314.674288       | 6  |
| 12 | 1267.595343 | 634.301310      | 1250.568794 | 625.788035       | 1249.584778    | 625.296027       | A    | 559.319837  | 280.163557      | 542.293288  | 271.650282       | 541.309272     | 271.158274       | 5  |
| 13 | 1338.632457 | 669.819866      | 1321.605908 | 661.306592       | 1320.621892    | 660.814584       | A    | 488.282723  | 244.644999      | 471.256174  | 236.131725       | 470.272158     | 235.639717       | 4  |
| 14 | 1467.675050 | 734.341163      | 1450.648501 | 725.827889       | 1449.664485    | 725.335881       | E    | 417.245609  | 209.126442      | 400.219060  | 200.613168       | 399.235044     | 200.121160       | 3  |
| 15 | 1580.759114 | 790.883195      | 1563.732565 | 782.369921       | 1562.748549    | 781.877912       | L    | 288.203016  | 144.605146      | 271.176467  | 136.091871       |                |                  | 2  |
| 16 |             |                 |             |                  |                |                  | R    | 175.118952  | 88.063114       | 158.092403  | 79.549839        |                |                  | 1  |

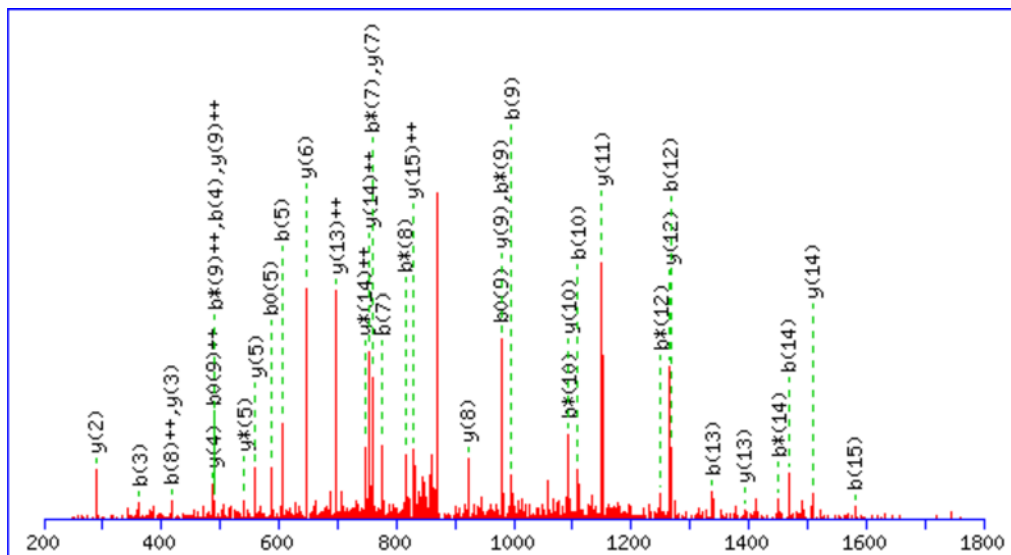

## Peptide View

MS/MS Fragmentation of **YSGSEGSTQTLTKGELK**

Found in **IP100017526**, Tax\_Id=9606 Gene\_Symbol=S100P Protein S100-P

**Experiment:** 53 - PyC-2 **Fraction:** PyC-2

Match to Query 14318: 1784.879848 from(893.447200,2+)

Title: OECHL100312\_17.7854.7854.2.dta

Data file \\Boromir\masse\Data LTQ-Orbitrap\Chrystelle Lacroix\Etude clinique sJPU\OECHL100312\_17.raw

**Monoisotopic mass of neutral peptide Mr(calc):** 1784.879211 **Fixed modifications:** Carbamidomethyl (C) (apply to specified residues or termini only) **Ions Score:** 73

**Expect:** 8.7e-006 **Matches :** 34/170 fragment ions using 60 most intense peaks ([help](#))

| # | b                 | b <sup>++</sup> | b* | b <sup>*++</sup> | b <sup>0</sup>    | b <sup>0++</sup> | Seq. | y                  | y <sup>++</sup>   | y*          | y <sup>*++</sup> | y <sup>0</sup> | y <sup>0++</sup> | #  |
|---|-------------------|-----------------|----|------------------|-------------------|------------------|------|--------------------|-------------------|-------------|------------------|----------------|------------------|----|
| 1 | 164.070605        | 82.538940       |    |                  |                   |                  | Y    |                    |                   |             |                  |                |                  | 17 |
| 2 | 251.102633        | 126.054954      |    |                  | 233.092068        | 117.049672       | S    | <b>1622.823172</b> | <b>811.915224</b> | 1605.796623 | 803.401950       | 1604.812607    | 802.909941       | 16 |
| 3 | 308.124097        | 154.565687      |    |                  | <b>290.113532</b> | 145.560404       | G    | <b>1535.791144</b> | <b>768.399210</b> | 1518.764595 | 759.885936       | 1517.780579    | 759.393928       | 15 |
| 4 | 395.156125        | 198.081701      |    |                  | 377.145560        | 189.076418       | S    | 1478.769680        | <b>739.888478</b> | 1461.743131 | 731.375204       | 1460.759115    | 730.883195       | 14 |
| 5 | <b>524.198718</b> | 262.602997      |    |                  | <b>506.188153</b> | 253.597715       | E    | <b>1391.737652</b> | <b>696.372464</b> | 1374.711103 | 687.859190       | 1373.727087    | 687.367182       | 13 |
| 6 | 581.220182        | 291.113729      |    |                  | 563.209617        | 282.108447       | G    | <b>1262.695059</b> | <b>631.851167</b> | 1245.668510 | 623.337893       | 1244.684494    | 622.845885       | 12 |

|    |                    |                   |                    |                   |                    |                   |   |                    |            |                    |            |                   |            |    |
|----|--------------------|-------------------|--------------------|-------------------|--------------------|-------------------|---|--------------------|------------|--------------------|------------|-------------------|------------|----|
| 7  | 668.252210         | 334.629743        |                    |                   | 650.241645         | 325.624461        | S | <b>1205.673595</b> | 603.340436 | 1188.647046        | 594.827161 | 1187.663030       | 594.335153 | 11 |
| 8  | 769.299889         | 385.153583        |                    |                   | 751.289324         | 376.148300        | T | <b>1118.641567</b> | 559.824421 | 1101.615018        | 551.311147 | 1100.631002       | 550.819139 | 10 |
| 9  | 897.358467         | 449.182872        | 880.331918         | 440.669597        | 879.347902         | 440.177589        | Q | <b>1017.593888</b> | 509.300582 | <b>1000.567339</b> | 500.787307 | 999.583323        | 500.295299 | 9  |
| 10 | 998.406146         | 499.706711        | 981.379597         | 491.193437        | <b>980.395581</b>  | 490.701429        | T | 889.535310         | 445.271293 | 872.508761         | 436.758018 | 871.524745        | 436.266010 | 8  |
| 11 | 1111.490210        | 556.248743        | 1094.463661        | 547.735469        | 1093.479645        | 547.243461        | L | <b>788.487631</b>  | 394.747453 | 771.461082         | 386.234179 | 770.477066        | 385.742171 | 7  |
| 12 | 1212.537889        | 606.772583        | <b>1195.511340</b> | <b>598.259308</b> | 1194.527324        | <b>597.767300</b> | T | <b>675.403567</b>  | 338.205421 | 658.377018         | 329.692147 | 657.393002        | 329.200139 | 6  |
| 13 | <b>1340.632852</b> | 670.820064        | 1323.606303        | 662.306790        | 1322.622287        | 661.814782        | K | <b>574.355888</b>  | 287.681582 | 557.329339         | 279.168307 | 556.345323        | 278.676299 | 5  |
| 14 | 1397.654316        | 699.330796        | 1380.627767        | 690.817522        | 1379.643751        | 690.325514        | G | <b>446.260925</b>  | 223.634100 | 429.234376         | 215.120826 | <b>428.250360</b> | 214.628818 | 4  |
| 15 | <b>1526.696909</b> | 763.852093        | 1509.670360        | 755.338818        | <b>1508.686344</b> | 754.846810        | E | 389.239461         | 195.123368 | 372.212912         | 186.610094 | 371.228896        | 186.118086 | 3  |
| 16 | <b>1639.780973</b> | <b>820.394124</b> | <b>1622.754424</b> | <b>811.880850</b> | 1621.770408        | <b>811.388842</b> | L | <b>260.196868</b>  | 130.602072 | 243.170319         | 122.088797 |                   |            | 2  |
| 17 |                    |                   |                    |                   |                    |                   | K | 147.112804         | 74.060040  | 130.086255         | 65.546765  |                   |            | 1  |

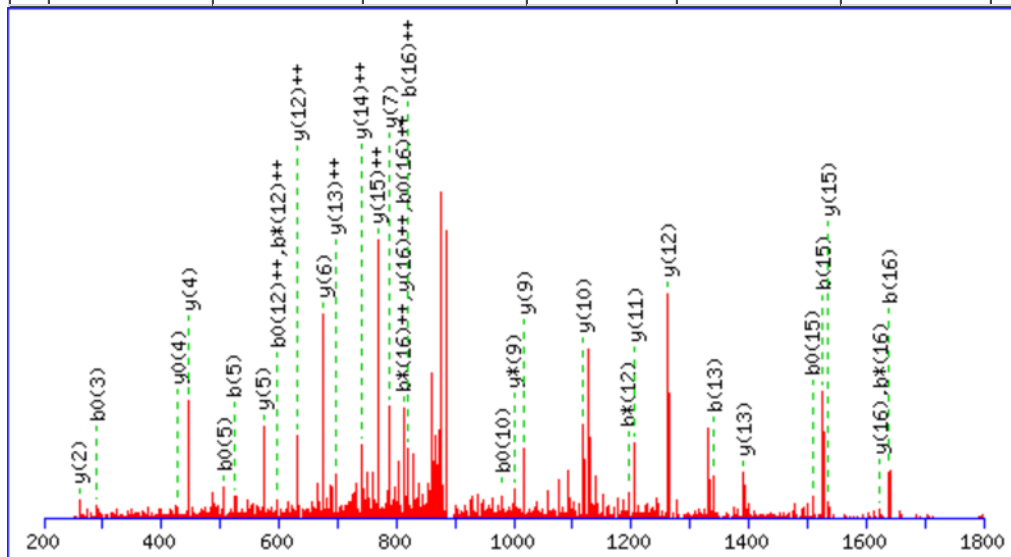

## Peptide View

MS/MS Fragmentation of **AVFVDLEPTVIDEVR**

Found in **IP100166768**, Tax\_Id=9606 Gene\_Symbol=TUBA1C TUBA1C protein

Experiment: 53 - PyC-2 Fraction: PyC-2



Match to Query 13751: 1700.900448 from(851.457500,2+)

Title: OECHL100312\_17.20296.20296.2.dta

Data file \\Boromir\masse\Data LTQ-Orbitrap\Chrystelle Lacroix\Etude clinique sJPU\OECHL100312\_17.raw

**Monoisotopic mass of neutral peptide Mr(calc):** 1700.898514**Fixed modifications:** Carbamidomethyl (C) (apply to specified residues or termini only)**Ions Score:** 51**Expect:** 0.001**Matches :** 11/128 fragment ions using 15 most intense peaks ([help](#))

| #  | b                  | b <sup>++</sup> | b <sup>0</sup> | b <sup>0++</sup> | Seq. | y                  | y <sup>++</sup> | y <sup>*</sup> | y <sup>*++</sup> | y <sup>0</sup> | y <sup>0++</sup> | #  |
|----|--------------------|-----------------|----------------|------------------|------|--------------------|-----------------|----------------|------------------|----------------|------------------|----|
| 1  | 72.044390          | 36.525833       |                |                  | A    |                    |                 |                |                  |                |                  | 15 |
| 2  | 171.112804         | 86.060040       |                |                  | V    | <b>1630.868665</b> | 815.937971      | 1613.842116    | 807.424696       | 1612.858100    | 806.932688       | 14 |
| 3  | <b>318.181218</b>  | 159.594247      |                |                  | F    | 1531.800251        | 766.403764      | 1514.773702    | 757.890489       | 1513.789686    | 757.398481       | 13 |
| 4  | 417.249632         | 209.128454      |                |                  | V    | <b>1384.731837</b> | 692.869557      | 1367.705288    | 684.356282       | 1366.721272    | 683.864274       | 12 |
| 5  | 532.276575         | 266.641926      | 514.266010     | 257.636643       | D    | <b>1285.663423</b> | 643.335350      | 1268.636874    | 634.822075       | 1267.652858    | 634.330067       | 11 |
| 6  | <b>645.360639</b>  | 323.183958      | 627.350074     | 314.178675       | L    | <b>1170.636480</b> | 585.821878      | 1153.609931    | 577.308604       | 1152.625915    | 576.816596       | 10 |
| 7  | <b>774.403232</b>  | 387.705254      | 756.392667     | 378.699972       | E    | <b>1057.552416</b> | 529.279846      | 1040.525867    | 520.766572       | 1039.541851    | 520.274564       | 9  |
| 8  | 871.455996         | 436.231636      | 853.445431     | 427.226354       | P    | <b>928.509823</b>  | 464.758550      | 911.483274     | 456.245275       | 910.499258     | 455.753267       | 8  |
| 9  | 972.503675         | 486.755476      | 954.493110     | 477.750193       | T    | 831.457059         | 416.232168      | 814.430510     | 407.718893       | 813.446494     | 407.226885       | 7  |
| 10 | 1071.572089        | 536.289683      | 1053.561524    | 527.284400       | V    | 730.409380         | 365.708328      | 713.382831     | 357.195054       | 712.398815     | 356.703046       | 6  |
| 11 | 1184.656153        | 592.831715      | 1166.645588    | 583.826432       | I    | 631.340966         | 316.174121      | 614.314417     | 307.660846       | 613.330401     | 307.168838       | 5  |
| 12 | 1299.683096        | 650.345186      | 1281.672531    | 641.339904       | D    | <b>518.256902</b>  | 259.632089      | 501.230353     | 251.118815       | 500.246337     | 250.626807       | 4  |
| 13 | 1428.725689        | 714.866483      | 1410.715124    | 705.861200       | E    | 403.229959         | 202.118617      | 386.203410     | 193.605343       | 385.219394     | 193.113335       | 3  |
| 14 | <b>1527.794103</b> | 764.400690      | 1509.783538    | 755.395407       | V    | 274.187366         | 137.597321      | 257.160817     | 129.084047       |                |                  | 2  |
| 15 |                    |                 |                |                  | R    | 175.118952         | 88.063114       | 158.092403     | 79.549839        |                |                  | 1  |

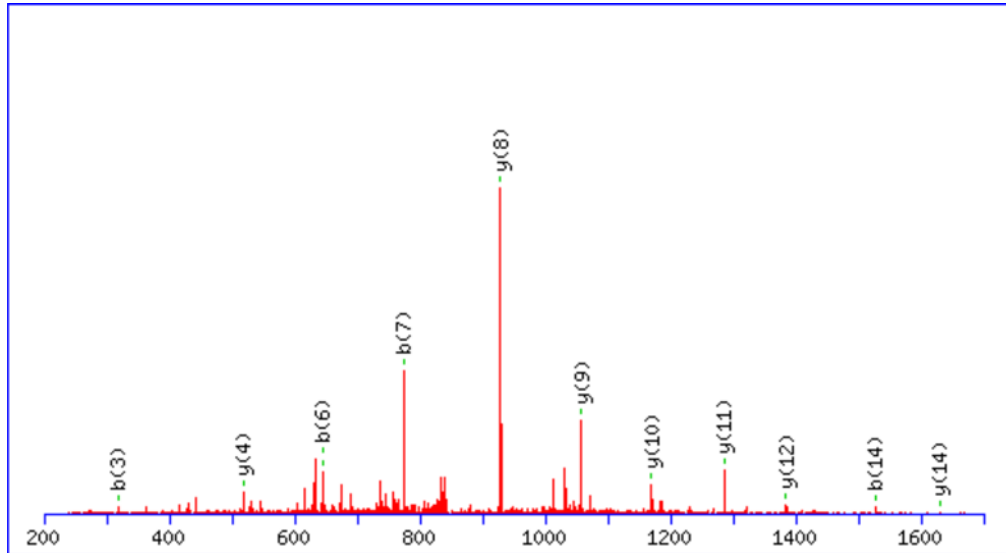

## Peptide View

MS/MS Fragmentation of **AGLQFPVGR**

Found in **IPI00018278**, Tax\_Id=9606 Gene\_Symbol=H2AFV Histone H2A.V

**Experiment:** 53 - PyC-2 **Fraction:** PyC-2

Match to Query 2886: 943.523648 from(472.769100,2+)

Title: OECHL100312\_17.13788.13788.2.dta

Data file \\Boromir\masse\Data LTQ-Orbitrap\Chrystelle Lacroix\Etude clinique sJPU\OECHL100312\_17.raw

**Monoisotopic mass of neutral peptide Mr(calc):** 943.523956 **Fixed modifications:** Carbamidomethyl (C) (apply to specified residues or termini only) **Ions Score:** 52

**Expect:** 0.00062 **Matches :** 17/58 fragment ions using 27 most intense peaks ([help](#))

| # | b          | b <sup>++</sup> | b*         | b <sup>*++</sup> | Seq. | y          | y <sup>++</sup> | y*         | y <sup>*++</sup> | # |
|---|------------|-----------------|------------|------------------|------|------------|-----------------|------------|------------------|---|
| 1 | 72.044390  | 36.525833       |            |                  | A    |            |                 |            |                  | 9 |
| 2 | 129.065854 | 65.036565       |            |                  | G    | 873.494114 | 437.250695      | 856.467565 | 428.737421       | 8 |
| 3 | 242.149918 | 121.578597      |            |                  | L    | 816.472650 | 408.739963      | 799.446101 | 400.226689       | 7 |
| 4 | 370.208496 | 185.607886      | 353.181947 | 177.094612       | Q    | 703.388586 | 352.197931      | 686.362037 | 343.684657       | 6 |
| 5 | 517.276910 | 259.142093      | 500.250361 | 250.628819       | F    | 575.330008 | 288.168642      | 558.303459 | 279.655368       | 5 |
| 6 | 614.329674 | 307.668475      | 597.303125 | 299.155201       | P    | 428.261594 | 214.634435      | 411.235045 | 206.121160       | 4 |

|   |                   |            |            |            |   |                   |            |                   |            |   |
|---|-------------------|------------|------------|------------|---|-------------------|------------|-------------------|------------|---|
| 7 | <b>713.398088</b> | 357.202682 | 696.371539 | 348.689408 | V | 331.208830        | 166.108053 | 314.182281        | 157.594778 | 3 |
| 8 | 770.419552        | 385.713414 | 753.393003 | 377.200140 | G | <b>232.140416</b> | 116.573846 | <b>215.113867</b> | 108.060571 | 2 |
| 9 |                   |            |            |            | R | <b>175.118952</b> | 88.063114  | 158.092403        | 79.549839  | 1 |

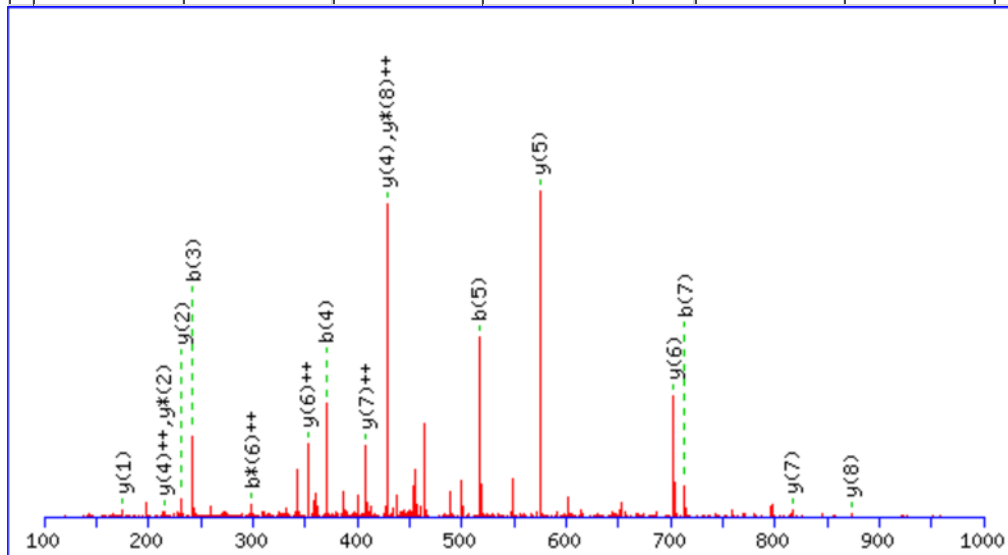

## Peptide View

MS/MS Fragmentation of **NPVLQQDAHSSVTITPQR**

Found in **IP100410488**, Tax\_Id=9606 Gene\_Symbol=CD276 Isoform 1 of CD276 antigen

**Experiment:** 53 - PyC-2 **Fraction:** PyC-2

Match to Query 15557: 1990.020972 from(664.347600,3+)

Title: OECHL100312\_17.9937.9937.3.dta

Data file \\Boromir\masse\Data LTQ-Orbitrap\Chrystelle Lacroix\Etude clinique sJPU\OECHL100312\_17.raw

**Monoisotopic mass of neutral peptide Mr(calc):** 1990.023209**Fixed modifications:** Carbamidomethyl (C) (apply to specified residues or termini only)**Ions Score:** 54

**Expect:** 0.0007**Matches :** 56/186 fragment ions using 92 most intense peaks ([help](#))

| # | b                 | b <sup>++</sup> | b <sup>*</sup>    | b <sup>*++</sup> | b <sup>0</sup> | b <sup>0++</sup> | Seq. | y           | y <sup>++</sup>   | y <sup>*</sup> | y <sup>*++</sup> | y <sup>0</sup> | y <sup>0++</sup> | #  |
|---|-------------------|-----------------|-------------------|------------------|----------------|------------------|------|-------------|-------------------|----------------|------------------|----------------|------------------|----|
| 1 | 115.050203        | 58.028740       | 98.023654         | 49.515465        |                |                  | N    |             |                   |                |                  |                |                  | 18 |
| 2 | <b>212.102967</b> | 106.555121      | <b>195.076418</b> | 98.041847        |                |                  | P    | 1876.987553 | 938.997415        | 1859.961004    | 930.484140       | 1858.976988    | 929.992132       | 17 |
| 3 | <b>311.171381</b> | 156.089328      | <b>294.144832</b> | 147.576054       |                |                  | V    | 1779.934789 | <b>890.471033</b> | 1762.908240    | 881.957758       | 1761.924224    | 881.465750       | 16 |

|    |                    |                   |                    |                   |                    |                   |          |                    |                   |             |                   |                    |                   |           |
|----|--------------------|-------------------|--------------------|-------------------|--------------------|-------------------|----------|--------------------|-------------------|-------------|-------------------|--------------------|-------------------|-----------|
| 4  | <b>424.255445</b>  | <b>212.631361</b> | <b>407.228896</b>  | 204.118086        |                    |                   | <b>L</b> | 1680.866375        | <b>840.936826</b> | 1663.839826 | <b>832.423551</b> | 1662.855810        | <b>831.931543</b> | <b>15</b> |
| 5  | <b>552.314023</b>  | 276.660650        | 535.287474         | 268.147375        |                    |                   | <b>Q</b> | 1567.782311        | <b>784.394794</b> | 1550.755762 | <b>775.881519</b> | 1549.771746        | <b>775.389511</b> | <b>14</b> |
| 6  | <b>680.372601</b>  | 340.689939        | 663.346052         | 332.176664        |                    |                   | <b>Q</b> | <b>1439.723733</b> | <b>720.365505</b> | 1422.697184 | 711.852230        | 1421.713168        | 711.360222        | <b>13</b> |
| 7  | <b>795.399544</b>  | 398.203410        | 778.372995         | 389.690136        | 777.388979         | 389.198128        | <b>D</b> | 1311.665155        | 656.336215        | 1294.638606 | 647.822941        | 1293.654590        | 647.330933        | <b>12</b> |
| 8  | 866.436658         | 433.721967        | 849.410109         | <b>425.208693</b> | 848.426093         | <b>424.716685</b> | <b>A</b> | 1196.638212        | <b>598.822744</b> | 1179.611663 | 590.309470        | <b>1178.627647</b> | 589.817462        | <b>11</b> |
| 9  | 1003.495570        | <b>502.251423</b> | 986.469021         | 493.738149        | 985.485005         | 493.246141        | <b>H</b> | <b>1125.601098</b> | <b>563.304187</b> | 1108.574549 | <b>554.790913</b> | 1107.590533        | 554.298905        | <b>10</b> |
| 10 | 1090.527598        | <b>545.767437</b> | 1073.501049        | 537.254163        | 1072.517033        | 536.762155        | <b>S</b> | <b>988.542186</b>  | 494.774731        | 971.515637  | 486.261457        | 970.531621         | 485.769449        | <b>9</b>  |
| 11 | <b>1177.559626</b> | 589.283451        | 1160.533077        | <b>580.770177</b> | <b>1159.549061</b> | <b>580.278169</b> | <b>S</b> | <b>901.510158</b>  | 451.258717        | 884.483609  | 442.745443        | 883.499593         | 442.253435        | <b>8</b>  |
| 12 | <b>1276.628040</b> | 638.817658        | <b>1259.601491</b> | <b>630.304384</b> | 1258.617475        | <b>629.812376</b> | <b>V</b> | <b>814.478130</b>  | <b>407.742703</b> | 797.451581  | 399.229428        | <b>796.467565</b>  | 398.737420        | <b>7</b>  |
| 13 | <b>1377.675719</b> | <b>689.341498</b> | <b>1360.649170</b> | <b>680.828223</b> | <b>1359.665154</b> | <b>680.336215</b> | <b>T</b> | <b>715.409716</b>  | <b>358.208496</b> | 698.383167  | 349.695221        | 697.399151         | 349.203213        | <b>6</b>  |
| 14 | <b>1490.759783</b> | 745.883530        | 1473.733234        | <b>737.370255</b> | 1472.749218        | <b>736.878247</b> | <b>I</b> | <b>614.362037</b>  | 307.684656        | 597.335488  | 299.171382        | 596.351472         | 298.679374        | <b>5</b>  |
| 15 | 1591.807462        | <b>796.407369</b> | 1574.780913        | 787.894095        | 1573.796897        | 787.402087        | <b>T</b> | <b>501.277973</b>  | 251.142624        | 484.251424  | 242.629350        | 483.267408         | 242.137342        | <b>4</b>  |
| 16 | 1688.860226        | 844.933751        | 1671.833677        | 836.420477        | 1670.849661        | 835.928469        | <b>P</b> | <b>400.230294</b>  | 200.618785        | 383.203745  | 192.105510        |                    |                   | <b>3</b>  |
| 17 | 1816.918804        | 908.963040        | 1799.892255        | 900.449766        | 1798.908239        | 899.957758        | <b>Q</b> | 303.177530         | 152.092403        | 286.150981  | 143.579128        |                    |                   | <b>2</b>  |
| 18 |                    |                   |                    |                   |                    |                   | <b>R</b> | 175.118952         | 88.063114         | 158.092403  | 79.549839         |                    |                   | <b>1</b>  |

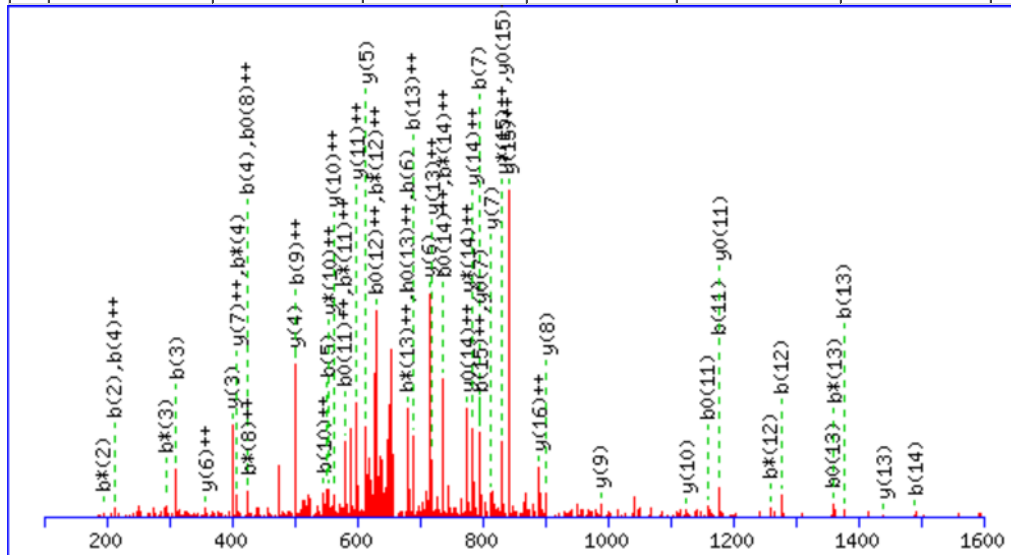

## Peptide View

MS/MS Fragmentation of **YSGSEGSTQTLTKGELK**Found in **IPI00017526**, Tax\_Id=9606 Gene\_Symbol=S100P Protein S100-P**Experiment:** 20 - NOPB2 **Fraction:** NOPB2

Match to Query 10924: 1784.880648 from(893.447600,2+)

Title: OECHL100312\_09.7129.7129.2.dta

Data file \\BOROMIR\Masse\Data LTQ-Orbitrap\Chrystelle Lacroix\Etude clinique sJPU\OECHL100312\_09.raw

**Monoisotopic mass of neutral peptide Mr(calc):** 1784.879211 **Fixed modifications:** Carbamidomethyl (C) (apply to specified residues or termini only) **Ions Score:** 79**Expect:** 1.8e-006 **Matches :** 13/170 fragment ions using 15 most intense peaks ([help](#))

| #  | b           | b <sup>++</sup> | b <sup>*</sup> | b <sup>*++</sup> | b <sup>0</sup> | b <sup>0++</sup> | Seq. | y           | y <sup>++</sup> | y <sup>*</sup> | y <sup>*++</sup> | y <sup>0</sup> | y <sup>0++</sup> | #  |
|----|-------------|-----------------|----------------|------------------|----------------|------------------|------|-------------|-----------------|----------------|------------------|----------------|------------------|----|
| 1  | 164.070605  | 82.538940       |                |                  |                |                  | Y    |             |                 |                |                  |                |                  | 17 |
| 2  | 251.102633  | 126.054954      |                |                  | 233.092068     | 117.049672       | S    | 1622.823172 | 811.915224      | 1605.796623    | 803.401950       | 1604.812607    | 802.909941       | 16 |
| 3  | 308.124097  | 154.565687      |                |                  | 290.113532     | 145.560404       | G    | 1535.791144 | 768.399210      | 1518.764595    | 759.885936       | 1517.780579    | 759.393928       | 15 |
| 4  | 395.156125  | 198.081701      |                |                  | 377.145560     | 189.076418       | S    | 1478.769680 | 739.888478      | 1461.743131    | 731.375204       | 1460.759115    | 730.883195       | 14 |
| 5  | 524.198718  | 262.602997      |                |                  | 506.188153     | 253.597715       | E    | 1391.737652 | 696.372464      | 1374.711103    | 687.859190       | 1373.727087    | 687.367182       | 13 |
| 6  | 581.220182  | 291.113729      |                |                  | 563.209617     | 282.108447       | G    | 1262.695059 | 631.851167      | 1245.668510    | 623.337893       | 1244.684494    | 622.845885       | 12 |
| 7  | 668.252210  | 334.629743      |                |                  | 650.241645     | 325.624461       | S    | 1205.673595 | 603.340436      | 1188.647046    | 594.827161       | 1187.663030    | 594.335153       | 11 |
| 8  | 769.299889  | 385.153583      |                |                  | 751.289324     | 376.148300       | T    | 1118.641567 | 559.824421      | 1101.615018    | 551.311147       | 1100.631002    | 550.819139       | 10 |
| 9  | 897.358467  | 449.182872      | 880.331918     | 440.669597       | 879.347902     | 440.177589       | Q    | 1017.593888 | 509.300582      | 1000.567339    | 500.787307       | 999.583323     | 500.295299       | 9  |
| 10 | 998.406146  | 499.706711      | 981.379597     | 491.193437       | 980.395581     | 490.701429       | T    | 889.535310  | 445.271293      | 872.508761     | 436.758018       | 871.524745     | 436.266010       | 8  |
| 11 | 1111.490210 | 556.248743      | 1094.463661    | 547.735469       | 1093.479645    | 547.243461       | L    | 788.487631  | 394.747453      | 771.461082     | 386.234179       | 770.477066     | 385.742171       | 7  |
| 12 | 1212.537889 | 606.772583      | 1195.511340    | 598.259308       | 1194.527324    | 597.767300       | T    | 675.403567  | 338.205421      | 658.377018     | 329.692147       | 657.393002     | 329.200139       | 6  |
| 13 | 1340.632852 | 670.820064      | 1323.606303    | 662.306790       | 1322.622287    | 661.814782       | K    | 574.355888  | 287.681582      | 557.329339     | 279.168307       | 556.345323     | 278.676299       | 5  |
| 14 | 1397.654316 | 699.330796      | 1380.627767    | 690.817522       | 1379.643751    | 690.325514       | G    | 446.260925  | 223.634100      | 429.234376     | 215.120826       | 428.250360     | 214.628818       | 4  |
| 15 | 1526.696909 | 763.852093      | 1509.670360    | 755.338818       | 1508.686344    | 754.846810       | E    | 389.239461  | 195.123368      | 372.212912     | 186.610094       | 371.228896     | 186.118086       | 3  |
| 16 | 1639.780973 | 820.394124      | 1622.754424    | 811.880850       | 1621.770408    | 811.388842       | L    | 260.196868  | 130.602072      | 243.170319     | 122.088797       |                |                  | 2  |
| 17 |             |                 |                |                  |                |                  | K    | 147.112804  | 74.060040       | 130.086255     | 65.546765        |                |                  | 1  |

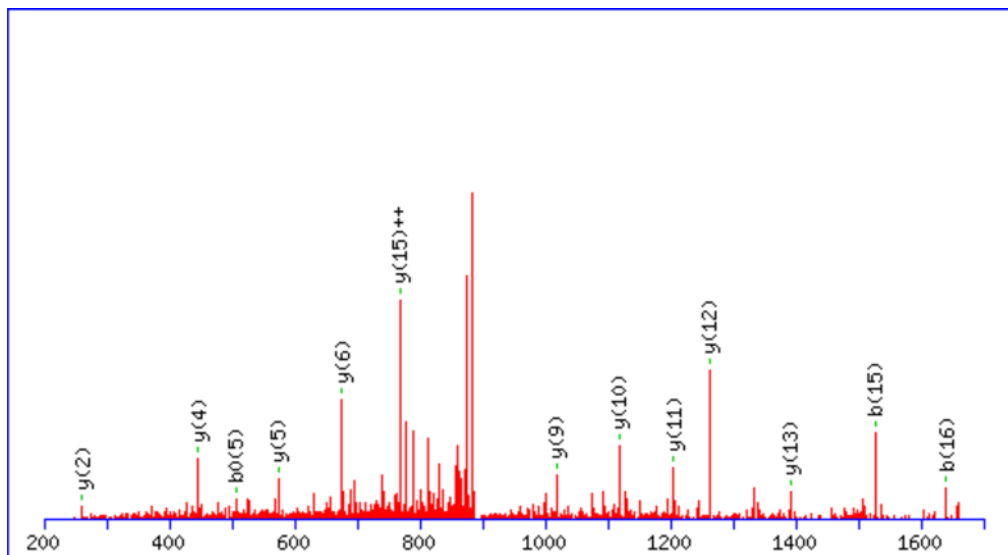

## Peptide View

MS/MS Fragmentation of **NPVLQQDAHSSVTITPQR**

Found in **IPI00410488**, Tax\_Id=9606 Gene\_Symbol=CD276 Isoform 1 of CD276 antigen

**Experiment:** 20 - NOPB2 **Fraction:** NOPB2

Match to Query 11930: 1990.025048 from(996.019800,2+)

Title: OECHL100312\_09.9245.9245.2.dta

Data file \\BOROMIR\Masse\Data LTQ-Orbitrap\Chrystelle Lacroix\Etude clinique sJPU\OECHL100312\_09.raw

**Monoisotopic mass of neutral peptide Mr(calc):** 1990.023209 **Fixed modifications:** Carbamidomethyl (C) (apply to specified residues or termini only) **Ions Score:** 72

**Expect:** 8.2e-006 **Matches :** 46/186 fragment ions using 96 most intense peaks ([help](#))

| # | b          | b <sup>++</sup> | b*         | b* <sup>++</sup> | b <sup>0</sup> | b <sup>0++</sup> | Seq. | y           | y <sup>++</sup> | y*          | y* <sup>++</sup> | y <sup>0</sup> | y <sup>0++</sup> | #  |
|---|------------|-----------------|------------|------------------|----------------|------------------|------|-------------|-----------------|-------------|------------------|----------------|------------------|----|
| 1 | 115.050203 | 58.028740       | 98.023654  | 49.515465        |                |                  | N    |             |                 |             |                  |                |                  | 18 |
| 2 | 212.102967 | 106.555121      | 195.076418 | 98.041847        |                |                  | P    | 1876.987553 | 938.997415      | 1859.961004 | 930.484140       | 1858.976988    | 929.992132       | 17 |
| 3 | 311.171381 | 156.089328      | 294.144832 | 147.576054       |                |                  | V    | 1779.934789 | 890.471033      | 1762.908240 | 881.957758       | 1761.924224    | 881.465750       | 16 |
| 4 | 424.255445 | 212.631361      | 407.228896 | 204.118086       |                |                  | L    | 1680.866375 | 840.936826      | 1663.839826 | 832.423551       | 1662.855810    | 831.931543       | 15 |
| 5 | 552.314023 | 276.660650      | 535.287474 | 268.147375       |                |                  | Q    | 1567.782311 | 784.394794      | 1550.755762 | 775.881519       | 1549.771746    | 775.389511       | 14 |
| 6 | 680.372601 | 340.689939      | 663.346052 | 332.176664       |                |                  | Q    | 1439.723733 | 720.365505      | 1422.697184 | 711.852230       | 1421.713168    | 711.360222       | 13 |

|    |                    |                   |                    |                   |                    |                   |   |                    |            |                    |                   |                   |                   |           |
|----|--------------------|-------------------|--------------------|-------------------|--------------------|-------------------|---|--------------------|------------|--------------------|-------------------|-------------------|-------------------|-----------|
| 7  | 795.399544         | 398.203410        | 778.372995         | 389.690136        | 777.388979         | 389.198128        | D | <b>1311.665155</b> | 656.336215 | <b>1294.638606</b> | <b>647.822941</b> | 1293.654590       | <b>647.330933</b> | <b>12</b> |
| 8  | 866.436658         | 433.721967        | 849.410109         | 425.208693        | 848.426093         | <b>424.716685</b> | A | <b>1196.638212</b> | 598.822744 | 1179.611663        | 590.309470        | 1178.627647       | 589.817462        | <b>11</b> |
| 9  | 1003.495570        | <b>502.251423</b> | 986.469021         | 493.738149        | 985.485005         | 493.246141        | H | <b>1125.601098</b> | 563.304187 | 1108.574549        | 554.790913        | 1107.590533       | 554.298905        | <b>10</b> |
| 10 | <b>1090.527598</b> | 545.767437        | 1073.501049        | 537.254163        | 1072.517033        | 536.762155        | S | <b>988.542186</b>  | 494.774731 | 971.515637         | 486.261457        | 970.531621        | 485.769449        | <b>9</b>  |
| 11 | 1177.559626        | 589.283451        | 1160.533077        | 580.770177        | 1159.549061        | 580.278169        | S | <b>901.510158</b>  | 451.258717 | 884.483609         | 442.745443        | <b>883.499593</b> | 442.253435        | <b>8</b>  |
| 12 | <b>1276.628040</b> | 638.817658        | <b>1259.601491</b> | 630.304384        | <b>1258.617475</b> | 629.812376        | V | <b>814.478130</b>  | 407.742703 | 797.451581         | 399.229428        | 796.467565        | 398.737420        | <b>7</b>  |
| 13 | <b>1377.675719</b> | 689.341498        | 1360.649170        | <b>680.828223</b> | 1359.665154        | <b>680.336215</b> | T | <b>715.409716</b>  | 358.208496 | 698.383167         | 349.695221        | 697.399151        | 349.203213        | <b>6</b>  |
| 14 | <b>1490.759783</b> | 745.883530        | <b>1473.733234</b> | 737.370255        | <b>1472.749218</b> | 736.878247        | I | <b>614.362037</b>  | 307.684656 | 597.335488         | 299.171382        | 596.351472        | 298.679374        | <b>5</b>  |
| 15 | <b>1591.807462</b> | 796.407369        | <b>1574.780913</b> | 787.894095        | <b>1573.796897</b> | 787.402087        | T | <b>501.277973</b>  | 251.142624 | <b>484.251424</b>  | 242.629350        | 483.267408        | 242.137342        | <b>4</b>  |
| 16 | 1688.860226        | 844.933751        | 1671.833677        | 836.420477        | 1670.849661        | 835.928469        | P | <b>400.230294</b>  | 200.618785 | 383.203745         | 192.105510        |                   |                   | <b>3</b>  |
| 17 | <b>1816.918804</b> | 908.963040        | 1799.892255        | 900.449766        | 1798.908239        | 899.957758        | Q | 303.177530         | 152.092403 | 286.150981         | 143.579128        |                   |                   | <b>2</b>  |
| 18 |                    |                   |                    |                   |                    |                   | R | 175.118952         | 88.063114  | 158.092403         | 79.549839         |                   |                   | <b>1</b>  |

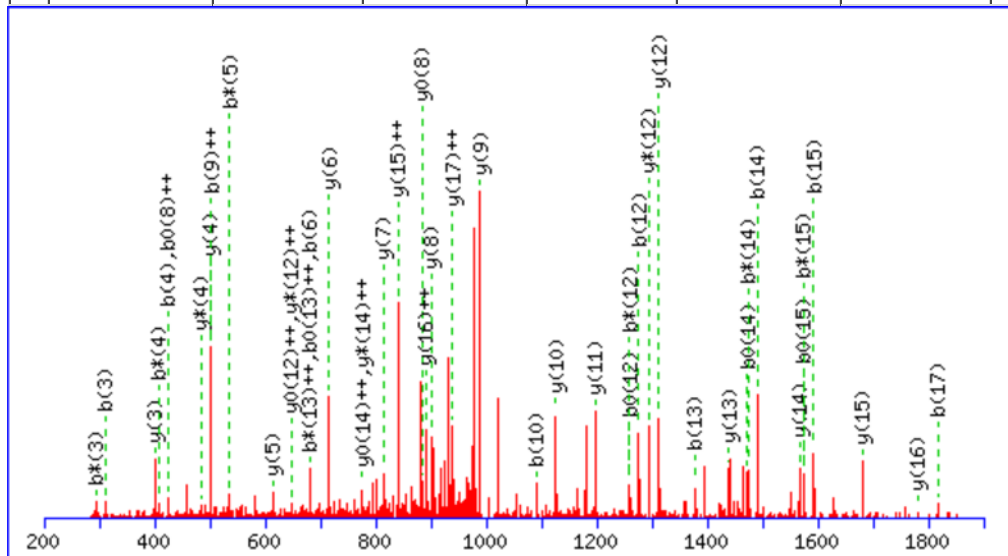

## Peptide View

MS/MS Fragmentation of **AHGQESAI FNEVAPGYFSR**

Found in **IP100170635**, Tax\_Id=9606 Gene\_Symbol=SECTM1 Secreted and transmembrane protein 1

Experiment: 20 - NOPB2 Fraction: NOPB2

Match to Query 12260: 2078.985448 from(1040.500000,2+)

Title: OECHL100312\_09.15719.15719.2.dta

Data file \\BOROMIR\Masse\Data LTQ-Orbitrap\Chrystelle Lacroix\Etude clinique sJPU\OECHL100312\_09.raw

**Monoisotopic mass of neutral peptide Mr(calc):** 2078.980988**Fixed modifications:** Carbamidomethyl (C) (apply to specified residues or termini only)**Ions Score:** 77**Expect:** 3.9e-006**Matches :** 23/200 fragment ions using 34 most intense peaks ([help](#))

| #  | b                  | b <sup>++</sup>   | b*          | b <sup>*++</sup> | b <sup>0</sup>    | b <sup>0++</sup> | Seq. | y                  | y <sup>++</sup> | y*                 | y <sup>*++</sup> | y <sup>0</sup> | y <sup>0++</sup>  | #  |
|----|--------------------|-------------------|-------------|------------------|-------------------|------------------|------|--------------------|-----------------|--------------------|------------------|----------------|-------------------|----|
| 1  | 72.044390          | 36.525833         |             |                  |                   |                  | A    |                    |                 |                    |                  |                |                   | 19 |
| 2  | 209.103302         | 105.055289        |             |                  |                   |                  | H    | 2008.951166        | 1004.979221     | 1991.924617        | 996.465947       | 1990.940601    | 995.973939        | 18 |
| 3  | 266.124766         | 133.566021        |             |                  |                   |                  | G    | <b>1871.892254</b> | 936.449765      | 1854.865705        | 927.936491       | 1853.881689    | 927.444483        | 17 |
| 4  | <b>394.183344</b>  | 197.595310        | 377.156795  | 189.082035       |                   |                  | Q    | 1814.870790        | 907.939033      | <b>1797.844241</b> | 899.425759       | 1796.860225    | 898.933751        | 16 |
| 5  | <b>523.225937</b>  | 262.116607        | 506.199388  | 253.603332       | 505.215372        | 253.111324       | E    | 1686.812212        | 843.909744      | 1669.785663        | 835.396470       | 1668.801647    | 834.904462        | 15 |
| 6  | 610.257965         | 305.632621        | 593.231416  | 297.119346       | 592.247400        | 296.627338       | S    | <b>1557.769619</b> | 779.388448      | 1540.743070        | 770.875173       | 1539.759054    | 770.383165        | 14 |
| 7  | <b>681.295079</b>  | 341.151178        | 664.268530  | 332.637903       | <b>663.284514</b> | 332.145895       | A    | <b>1470.737591</b> | 735.872434      | 1453.711042        | 727.359159       | 1452.727026    | <b>726.867151</b> | 13 |
| 8  | 794.379143         | 397.693210        | 777.352594  | 389.179935       | 776.368578        | 388.687927       | I    | 1399.700477        | 700.353877      | 1382.673928        | 691.840602       | 1381.689912    | 691.348594        | 12 |
| 9  | <b>941.447557</b>  | 471.227417        | 924.421008  | 462.714142       | 923.436992        | 462.222134       | F    | <b>1286.616413</b> | 643.811845      | 1269.589864        | 635.298570       | 1268.605848    | 634.806562        | 11 |
| 10 | 1055.490484        | 528.248880        | 1038.463935 | 519.735606       | 1037.479919       | 519.243597       | N    | <b>1139.547999</b> | 570.277638      | 1122.521450        | 561.764363       | 1121.537434    | 561.272355        | 10 |
| 11 | <b>1184.533077</b> | 592.770176        | 1167.506528 | 584.256902       | 1166.522512       | 583.764894       | E    | 1025.505072        | 513.256174      | 1008.478523        | 504.742900       | 1007.494507    | 504.250892        | 9  |
| 12 | <b>1283.601491</b> | 642.304383        | 1266.574942 | 633.791109       | 1265.590926       | 633.299101       | V    | <b>896.462479</b>  | 448.734878      | 879.435930         | 440.221603       | 878.451914     | 439.729595        | 8  |
| 13 | <b>1354.638605</b> | 677.822940        | 1337.612056 | 669.309666       | 1336.628040       | 668.817658       | A    | <b>797.394065</b>  | 399.200671      | 780.367516         | 390.687396       | 779.383500     | 390.195388        | 7  |
| 14 | 1451.691369        | <b>726.349322</b> | 1434.664820 | 717.836048       | 1433.680804       | 717.344040       | P    | <b>726.356951</b>  | 363.682114      | 709.330402         | 355.168839       | 708.346386     | 354.676831        | 6  |
| 15 | 1508.712833        | 754.860054        | 1491.686284 | 746.346780       | 1490.702268       | 745.854772       | G    | 629.304187         | 315.155732      | 612.277638         | 306.642457       | 611.293622     | 306.150449        | 5  |
| 16 | <b>1671.776162</b> | 836.391719        | 1654.749613 | 827.878445       | 1653.765597       | 827.386436       | Y    | <b>572.282723</b>  | 286.645000      | 555.256174         | 278.131725       | 554.272158     | 277.639717        | 4  |
| 17 | 1818.844576        | 909.925926        | 1801.818027 | 901.412652       | 1800.834011       | 900.920643       | F    | <b>409.219394</b>  | 205.113335      | 392.192845         | 196.600061       | 391.208829     | 196.108053        | 3  |
| 18 | <b>1905.876604</b> | 953.441940        | 1888.850055 | 944.928666       | 1887.866039       | 944.436658       | S    | 262.150980         | 131.579128      | 245.124431         | 123.065854       | 244.140415     | 122.573846        | 2  |
| 19 |                    |                   |             |                  |                   |                  | R    | 175.118952         | 88.063114       | 158.092403         | 79.549840        |                |                   | 1  |



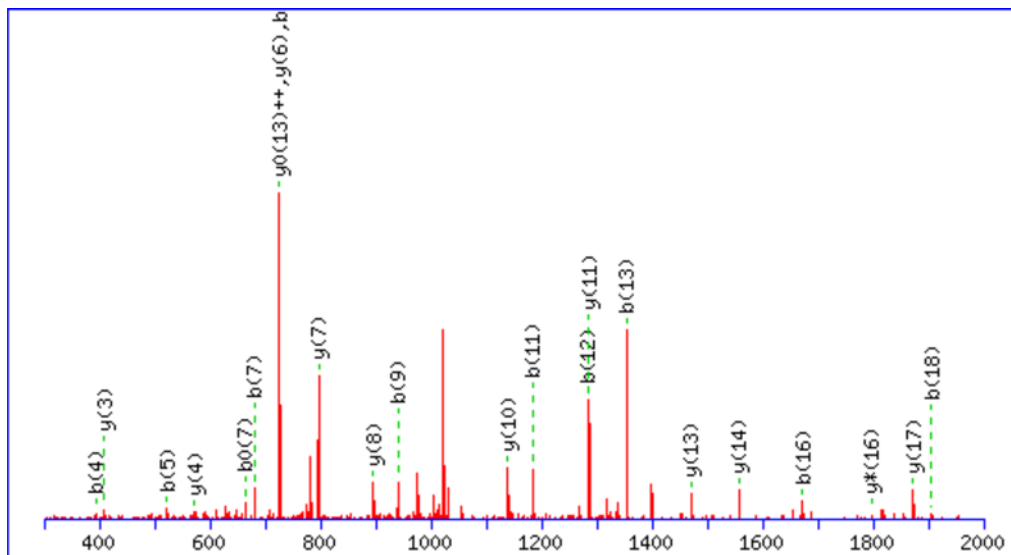

## Peptide View

MS/MS Fragmentation of **ITCAEEGWSPTPK**

Found in **IPI00006154**, Tax\_Id=9606 Gene\_Symbol=CFHR2 Isoform Long of Complement factor H-related protein 2

**Experiment:** 20 - NOPB2 **Fraction:** NOPB2

Match to Query 8433: 1474.677248 from(738.345900,2+)

Title: OECHL100312\_09.9707.9707.2.dta

Data file \\BOROMIR\Masse\Data LTQ-Orbitrap\Chrystelle Lacroix\Etude clinique sJPU\OECHL100312\_09.raw

**Monoisotopic mass of neutral peptide Mr(calc):** 1474.676224 **Fixed modifications:** Carbamidomethyl (C) (apply to specified residues or termini only) **Ions Score:** 70

**Expect:** 1.2e-005 **Matches :** 23/114 fragment ions using 39 most intense peaks ([help](#))

| # | b          | b <sup>++</sup> | b <sup>0</sup> | b <sup>0++</sup> | Seq. | y           | y <sup>++</sup> | y*          | y <sup>*++</sup> | y <sup>0</sup> | y <sup>0++</sup> | #  |
|---|------------|-----------------|----------------|------------------|------|-------------|-----------------|-------------|------------------|----------------|------------------|----|
| 1 | 114.091340 | 57.549308       |                |                  | I    |             |                 |             |                  |                |                  | 13 |
| 2 | 215.139019 | 108.073147      | 197.128454     | 99.067865        | T    | 1362.599444 | 681.803360      | 1345.572895 | 673.290086       | 1344.588879    | 672.798078       | 12 |
| 3 | 375.169668 | 188.088472      | 357.159103     | 179.083190       | C    | 1261.551765 | 631.279521      | 1244.525216 | 622.766246       | 1243.541200    | 622.274238       | 11 |
| 4 | 446.206782 | 223.607029      | 428.196217     | 214.601747       | A    | 1101.521116 | 551.264196      | 1084.494567 | 542.750922       | 1083.510551    | 542.258914       | 10 |
| 5 | 575.249375 | 288.128326      | 557.238810     | 279.123043       | E    | 1030.484002 | 515.745639      | 1013.457453 | 507.232365       | 1012.473437    | 506.740357       | 9  |
| 6 | 704.291968 | 352.649622      | 686.281403     | 343.644340       | E    | 901.441409  | 451.224343      | 884.414860  | 442.711068       | 883.430844     | 442.219060       | 8  |

|    |             |            |             |            |   |            |            |            |            |            |            |   |
|----|-------------|------------|-------------|------------|---|------------|------------|------------|------------|------------|------------|---|
| 7  | 761.313432  | 381.160354 | 743.302867  | 372.155072 | G | 772.398816 | 386.703046 | 755.372267 | 378.189772 | 754.388251 | 377.697764 | 7 |
| 8  | 947.392745  | 474.200011 | 929.382180  | 465.194728 | W | 715.377352 | 358.192314 | 698.350803 | 349.679040 | 697.366787 | 349.187032 | 6 |
| 9  | 1034.424773 | 517.716025 | 1016.414208 | 508.710742 | S | 529.298039 | 265.152658 | 512.271490 | 256.639383 | 511.287474 | 256.147375 | 5 |
| 10 | 1131.477537 | 566.242407 | 1113.466972 | 557.237124 | P | 442.266011 | 221.636644 | 425.239462 | 213.123369 | 424.255446 | 212.631361 | 4 |
| 11 | 1232.525216 | 616.766246 | 1214.514651 | 607.760964 | T | 345.213247 | 173.110262 | 328.186698 | 164.596987 | 327.202682 | 164.104979 | 3 |
| 12 | 1329.577980 | 665.292628 | 1311.567415 | 656.287346 | P | 244.165568 | 122.586422 | 227.139019 | 114.073148 |            |            | 2 |
| 13 |             |            |             |            | K | 147.112804 | 74.060040  | 130.086255 | 65.546765  |            |            | 1 |

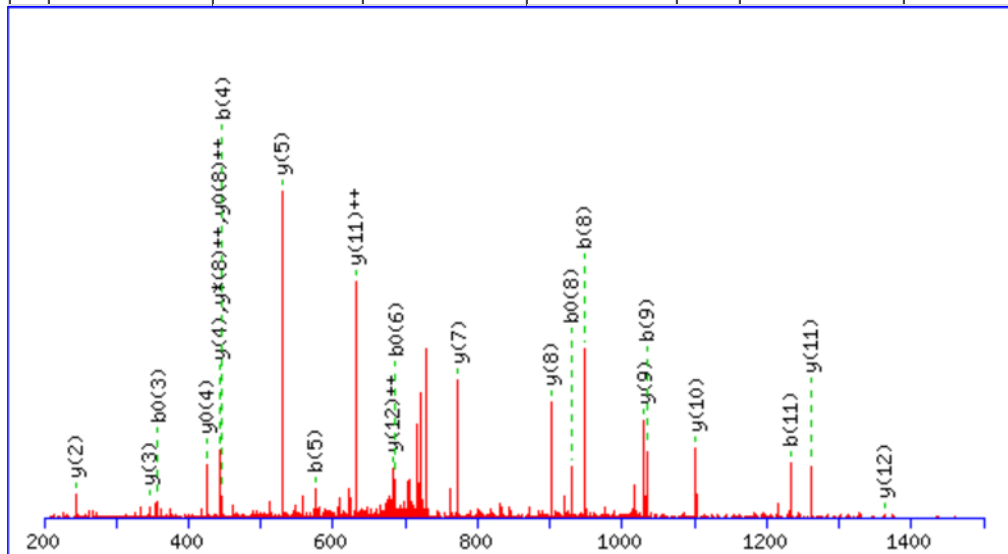

## Peptide View

MS/MS Fragmentation of **ANAGKPKDPTFIPAPIQAK**

Found in **IPI00032220**, Tax\_Id=9606 Gene\_Symbol=AGT Angiotensinogen

**Experiment:** 20 - NOPB2 **Fraction:** NOPB2

Match to Query 11800: 1963.088448 from(982.551500,2+)

Title: OECHL100312\_09.10861.10861.2.dta

Data file \\BOROMIR\Masse\Data LTQ-Orbitrap\Chrystelle Lacroix\Etude clinique sJPU\OECHL100312\_09.raw

**Monoisotopic mass of neutral peptide Mr(calc):** 1963.089066 **Fixed modifications:** Carbamidomethyl (C) (apply to specified residues or termini only) **Ions Score:** 53

**Expect:** 0.00019 **Matches :** 27/182 fragment ions using 46 most intense peaks ([help](#))

| #         | <b>b</b>           | <b>b<sup>++</sup></b> | <b>b<sup>*</sup></b> | <b>b<sup>*++</sup></b> | <b>b<sup>0</sup></b> | <b>b<sup>0++</sup></b> | Seq.     | <b>y</b>           | <b>y<sup>++</sup></b> | <b>y<sup>*</sup></b> | <b>y<sup>*++</sup></b> | <b>y<sup>0</sup></b> | <b>y<sup>0++</sup></b> | #         |
|-----------|--------------------|-----------------------|----------------------|------------------------|----------------------|------------------------|----------|--------------------|-----------------------|----------------------|------------------------|----------------------|------------------------|-----------|
| <b>1</b>  | 72.044390          | 36.525833             |                      |                        |                      |                        | <b>A</b> |                    |                       |                      |                        |                      |                        | <b>19</b> |
| <b>2</b>  | 186.087317         | 93.547296             | 169.060768           | 85.034022              |                      |                        | <b>N</b> | 1893.059261        | 947.033269            | 1876.032712          | 938.519994             | 1875.048696          | 938.027986             | <b>18</b> |
| <b>3</b>  | 257.124431         | 129.065854            | 240.097882           | 120.552579             |                      |                        | <b>A</b> | 1779.016334        | 890.011805            | 1761.989785          | 881.498531             | 1761.005769          | 881.006523             | <b>17</b> |
| <b>4</b>  | <b>314.145895</b>  | 157.576585            | 297.119346           | 149.063311             |                      |                        | <b>G</b> | 1707.979220        | 854.493248            | 1690.952671          | 845.979974             | 1689.968655          | 845.487965             | <b>16</b> |
| <b>5</b>  | <b>442.240858</b>  | 221.624067            | 425.214309           | 213.110793             |                      |                        | <b>K</b> | 1650.957756        | 825.982516            | 1633.931207          | 817.469242             | 1632.947191          | 816.977234             | <b>15</b> |
| <b>6</b>  | 539.293622         | 270.150449            | 522.267073           | 261.637175             |                      |                        | <b>P</b> | <b>1522.862793</b> | 761.935035            | <b>1505.836244</b>   | 753.421760             | 1504.852228          | 752.929752             | <b>14</b> |
| <b>7</b>  | <b>667.388585</b>  | 334.197931            | 650.362036           | 325.684656             |                      |                        | <b>K</b> | 1425.810029        | 713.408653            | <b>1408.783480</b>   | 704.895378             | 1407.799464          | 704.403370             | <b>13</b> |
| <b>8</b>  | <b>782.415528</b>  | 391.711402            | 765.388979           | 383.198128             | 764.404963           | 382.706120             | <b>D</b> | <b>1297.715066</b> | 649.361171            | 1280.688517          | 640.847897             | 1279.704501          | 640.355888             | <b>12</b> |
| <b>9</b>  | 879.468292         | 440.237784            | 862.441743           | 431.724510             | 861.457727           | 431.232502             | <b>P</b> | <b>1182.688123</b> | 591.847700            | 1165.661574          | <b>583.334425</b>      | 1164.677558          | <b>582.842417</b>      | <b>11</b> |
| <b>10</b> | 980.515971         | 490.761624            | 963.489422           | 482.248349             | 962.505406           | 481.756341             | <b>T</b> | 1085.635359        | 543.321318            | 1068.608810          | 534.808043             | 1067.624794          | 534.316035             | <b>10</b> |
| <b>11</b> | <b>1127.584385</b> | 564.295831            | 1110.557836          | 555.782556             | 1109.573820          | 555.290548             | <b>F</b> | 984.587680         | 492.797478            | 967.561131           | 484.284204             |                      |                        | <b>9</b>  |
| <b>12</b> | <b>1240.668449</b> | 620.837863            | <b>1223.641900</b>   | 612.324588             | 1222.657884          | 611.832580             | <b>I</b> | <b>837.519266</b>  | 419.263271            | 820.492717           | 410.749997             |                      |                        | <b>8</b>  |
| <b>13</b> | 1337.721213        | 669.364245            | 1320.694664          | 660.850970             | 1319.710648          | 660.358962             | <b>P</b> | <b>724.435202</b>  | 362.721239            | 707.408653           | 354.207965             |                      |                        | <b>7</b>  |
| <b>14</b> | <b>1408.758327</b> | 704.882802            | <b>1391.731778</b>   | 696.369527             | 1390.747762          | 695.877519             | <b>A</b> | <b>627.382438</b>  | <b>314.194857</b>     | 610.355889           | 305.681583             |                      |                        | <b>6</b>  |
| <b>15</b> | <b>1505.811091</b> | 753.409184            | 1488.784542          | 744.895909             | 1487.800526          | 744.403901             | <b>P</b> | <b>556.345324</b>  | 278.676300            | 539.318775           | 270.163026             |                      |                        | <b>5</b>  |
| <b>16</b> | <b>1618.895155</b> | 809.951215            | <b>1601.868606</b>   | 801.437941             | 1600.884590          | 800.945933             | <b>I</b> | 459.292560         | 230.149918            | <b>442.266011</b>    | 221.636643             |                      |                        | <b>4</b>  |
| <b>17</b> | <b>1746.953733</b> | 873.980505            | 1729.927184          | 865.467230             | 1728.943168          | 864.975222             | <b>Q</b> | 346.208496         | 173.607886            | <b>329.181947</b>    | 165.094612             |                      |                        | <b>3</b>  |
| <b>18</b> | 1817.990847        | 909.499062            | 1800.964298          | 900.985787             | 1799.980282          | 900.493779             | <b>A</b> | 218.149918         | 109.578597            | 201.123369           | 101.065322             |                      |                        | <b>2</b>  |
| <b>19</b> |                    |                       |                      |                        |                      |                        | <b>K</b> | 147.112804         | 74.060040             | 130.086255           | 65.546765              |                      |                        | <b>1</b>  |

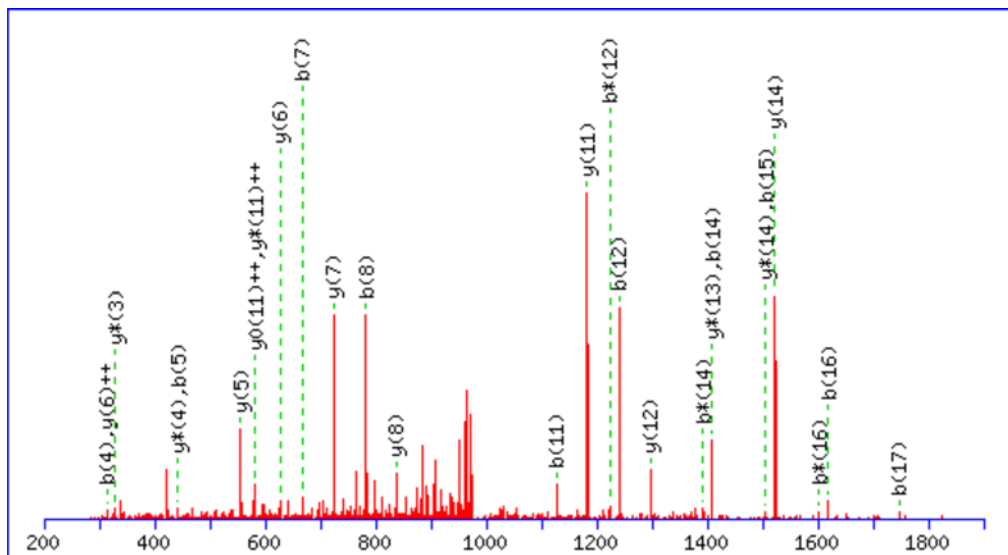

## Peptide View

MS/MS Fragmentation of **IESVLSSSGKR**

Found in **IPI00018236**, Tax\_Id=9606 Gene\_Symbol=GM2A Ganglioside GM2 activator

**Experiment:** 20 - NOPB2 **Fraction:** NOPB2

Match to Query 4715: 1161.635048 from(581.824800,2+)

Title: OECHL100312\_09.5136.5136.2.dta

Data file \\BOROMIR\Masse\Data LTQ-Orbitrap\Chrystelle Lacroix\Etude clinique sJPU\OECHL100312\_09.raw

**Monoisotopic mass of neutral peptide Mr(calc):** 1161.635330 **Fixed modifications:** Carbamidomethyl (C) (apply to specified residues or termini only) **Ions Score:** 51

**Expect:** 0.00049 **Matches :** 24/94 fragment ions using 50 most intense peaks ([help](#))

| # | b                 | b <sup>++</sup>   | b* | b <sup>*++</sup> | b <sup>0</sup>    | b <sup>0++</sup> | Seq. | y                  | y <sup>++</sup>   | y*          | y <sup>*++</sup>  | y <sup>0</sup>    | y <sup>0++</sup>  | #  |
|---|-------------------|-------------------|----|------------------|-------------------|------------------|------|--------------------|-------------------|-------------|-------------------|-------------------|-------------------|----|
| 1 | 114.091340        | 57.549308         |    |                  |                   |                  | I    |                    |                   |             |                   |                   |                   | 11 |
| 2 | <b>243.133933</b> | 122.070605        |    |                  | 225.123368        | 113.065322       | E    | <b>1049.558562</b> | <b>525.282919</b> | 1032.532013 | 516.769645        | 1031.547997       | 516.277637        | 10 |
| 3 | <b>330.165961</b> | 165.586618        |    |                  | <b>312.155396</b> | 156.581336       | S    | <b>920.515969</b>  | <b>460.761623</b> | 903.489420  | <b>452.248348</b> | <b>902.505404</b> | <b>451.756340</b> | 9  |
| 4 | <b>429.234375</b> | <b>215.120826</b> |    |                  | <b>411.223810</b> | 206.115543       | V    | <b>833.483941</b>  | 417.245609        | 816.457392  | 408.732334        | 815.473376        | 408.240326        | 8  |
| 5 | 542.318439        | 271.662858        |    |                  | 524.307874        | 262.657575       | L    | <b>734.415527</b>  | 367.711402        | 717.388978  | 359.198127        | 716.404962        | 358.706119        | 7  |
| 6 | 629.350467        | 315.178872        |    |                  | 611.339902        | 306.173589       | S    | <b>621.331463</b>  | 311.169370        | 604.304914  | 302.656095        | 603.320898        | 302.164087        | 6  |

|    |            |            |            |            |            |            |   |            |            |            |            |            |            |   |
|----|------------|------------|------------|------------|------------|------------|---|------------|------------|------------|------------|------------|------------|---|
| 7  | 716.382495 | 358.694886 |            |            | 698.371930 | 349.689603 | S | 534.299435 | 267.653356 | 517.272886 | 259.140081 | 516.288870 | 258.648073 | 5 |
| 8  | 803.414523 | 402.210899 |            |            | 785.403958 | 393.205617 | S | 447.267407 | 224.137342 | 430.240858 | 215.624067 | 429.256842 | 215.132059 | 4 |
| 9  | 860.435987 | 430.721632 |            |            | 842.425422 | 421.716349 | G | 360.235379 | 180.621328 | 343.208830 | 172.108053 |            |            | 3 |
| 10 | 988.530950 | 494.769113 | 971.504401 | 486.255838 | 970.520385 | 485.763830 | K | 303.213915 | 152.110596 | 286.187366 | 143.597321 |            |            | 2 |
| 11 |            |            |            |            |            |            | R | 175.118952 | 88.063114  | 158.092403 | 79.549840  |            |            | 1 |

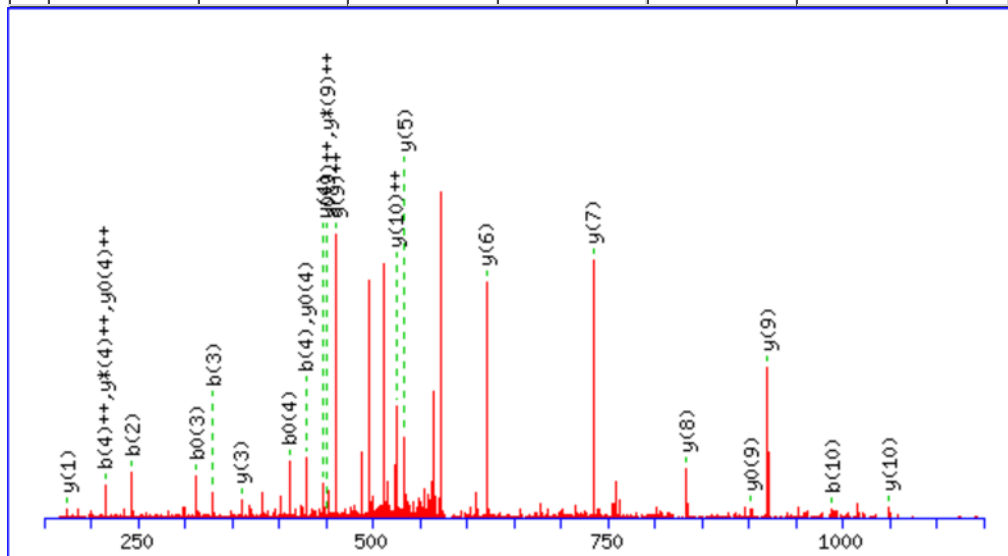

## Peptide View

MS/MS Fragmentation of **CQCPAGAALQADGR**

Found in **IP100010737**, Tax\_Id=9606 Gene\_Symbol=THBD Thrombomodulin

Experiment: 20 - NOPB2 Fraction: NOPB2

Match to Query 8420: 1473.646048 from(737.830300,2+)

Title: OECHL100312\_09.7040.7040.2.dta

Data file \\BOROMIR\Masse\Data LTQ-Orbitrap\Chrystelle Lacroix\Etude clinique sJPU\OECHL100312\_09.raw

**Monoisotopic mass of neutral peptide Mr(calc):** 1473.645279 **Fixed modifications:** Carbamidomethyl (C) (apply to specified residues or termini only) **Ions Score:** 74

**Expect:** 1.8e-006 **Matches :** 33/128 fragment ions using 51 most intense peaks ([help](#))

| # | b          | b <sup>++</sup> | b <sup>*</sup> | b <sup>*++</sup> | b <sup>0</sup> | b <sup>0++</sup> | Seq. | y | y <sup>++</sup> | y <sup>*</sup> | y <sup>*++</sup> | y <sup>0</sup> | y <sup>0++</sup> | #  |
|---|------------|-----------------|----------------|------------------|----------------|------------------|------|---|-----------------|----------------|------------------|----------------|------------------|----|
| 1 | 161.037925 | 81.022600       |                |                  |                |                  | C    |   |                 |                |                  |                |                  | 14 |

|    |                    |                   |                    |                   |             |            |   |                    |                   |                    |            |                   |            |           |
|----|--------------------|-------------------|--------------------|-------------------|-------------|------------|---|--------------------|-------------------|--------------------|------------|-------------------|------------|-----------|
| 2  | <b>289.096503</b>  | 145.051890        | <b>272.069954</b>  | 136.538615        |             |            | Q | 1314.621912        | 657.814594        | 1297.595363        | 649.301320 | 1296.611347       | 648.809312 | <b>13</b> |
| 3  | <b>449.127152</b>  | 225.067214        | 432.100603         | 216.553940        |             |            | C | <b>1186.563334</b> | <b>593.785305</b> | <b>1169.536785</b> | 585.272031 | 1168.552769       | 584.780023 | <b>12</b> |
| 4  | <b>546.179916</b>  | 273.593596        | <b>529.153367</b>  | 265.080322        |             |            | P | <b>1026.532685</b> | 513.769981        | 1009.506136        | 505.256706 | 1008.522120       | 504.764698 | <b>11</b> |
| 5  | <b>617.217030</b>  | 309.112153        | 600.190481         | 300.598879        |             |            | A | <b>929.479921</b>  | 465.243599        | <b>912.453372</b>  | 456.730324 | 911.469356        | 456.238316 | <b>10</b> |
| 6  | <b>674.238494</b>  | 337.622885        | 657.211945         | <b>329.109611</b> |             |            | G | <b>858.442807</b>  | 429.725042        | 841.416258         | 421.211767 | 840.432242        | 420.719759 | <b>9</b>  |
| 7  | 745.275608         | 373.141442        | <b>728.249059</b>  | 364.628168        |             |            | A | 801.421343         | 401.214310        | 784.394794         | 392.701035 | 783.410778        | 392.209027 | <b>8</b>  |
| 8  | <b>816.312722</b>  | 408.659999        | 799.286173         | 400.146725        |             |            | A | <b>730.384229</b>  | 365.695753        | 713.357680         | 357.182478 | 712.373664        | 356.690470 | <b>7</b>  |
| 9  | <b>929.396786</b>  | 465.202031        | <b>912.370237</b>  | 456.688757        |             |            | L | <b>659.347115</b>  | 330.177196        | 642.320566         | 321.663921 | 641.336550        | 321.171913 | <b>6</b>  |
| 10 | <b>1057.455364</b> | <b>529.231320</b> | 1040.428815        | 520.718046        |             |            | Q | <b>546.263051</b>  | 273.635164        | <b>529.236502</b>  | 265.121889 | 528.252486        | 264.629881 | <b>5</b>  |
| 11 | <b>1128.492478</b> | 564.749877        | 1111.465929        | 556.236603        |             |            | A | <b>418.204473</b>  | 209.605874        | 401.177924         | 201.092600 | 400.193908        | 200.600592 | <b>4</b>  |
| 12 | <b>1243.519421</b> | 622.263349        | <b>1226.492872</b> | 613.750074        | 1225.508856 | 613.258066 | D | <b>347.167359</b>  | 174.087317        | 330.140810         | 165.574043 | <b>329.156794</b> | 165.082035 | <b>3</b>  |
| 13 | <b>1300.540885</b> | 650.774081        | 1283.514336        | 642.260806        | 1282.530320 | 641.768798 | G | <b>232.140416</b>  | 116.573846        | 215.113867         | 108.060571 |                   |            | <b>2</b>  |
| 14 |                    |                   |                    |                   |             |            | R | 175.118952         | 88.063114         | 158.092403         | 79.549839  |                   |            | <b>1</b>  |

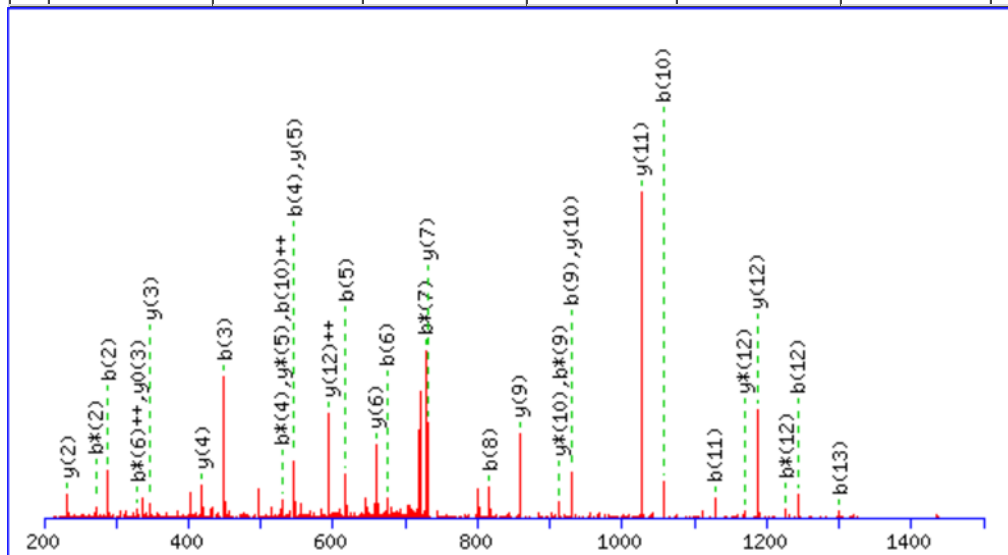

## Peptide View

MS/MS Fragmentation of **TELLNVCMNAK**

Found in **IPI00441498**, Tax\_Id=9606 Gene\_Symbol=FOLR1 Folate receptor alpha

**Experiment:** 20 - NOPB2 **Fraction:** NOPB2

Match to Query 6597: 1291.627048 from(646.820800,2+)

Title: OECHL100312\_09.13253.13253.2.dta

Data file \\BOROMIR\Masse\Data LTQ-Orbitrap\Chrystelle Lacroix\Etude clinique sJPU\OECHL100312\_09.raw

**Monoisotopic mass of neutral peptide Mr(calc):** 1291.626419 **Fixed modifications:** Carbamidomethyl (C) (apply to specified residues or termini only) **Ions Score:** 50

**Expect:** 0.0011 **Matches :** 17/94 fragment ions using 34 most intense peaks ([help](#))

| #  | b                  | b <sup>++</sup> | b*                | b <sup>*++</sup> | b <sup>0</sup> | b <sup>0++</sup> | Seq. | y                  | y <sup>++</sup>   | y*          | y <sup>*++</sup> | y <sup>0</sup> | y <sup>0++</sup> | #  |
|----|--------------------|-----------------|-------------------|------------------|----------------|------------------|------|--------------------|-------------------|-------------|------------------|----------------|------------------|----|
| 1  | 102.054955         | 51.531116       |                   |                  | 84.044390      | 42.525833        | T    |                    |                   |             |                  |                |                  | 11 |
| 2  | <b>231.097548</b>  | 116.052412      |                   |                  | 213.086983     | 107.047130       | E    | 1191.586041        | 596.296659        | 1174.559492 | 587.783384       | 1173.575476    | 587.291376       | 10 |
| 3  | <b>344.181612</b>  | 172.594444      |                   |                  | 326.171047     | 163.589162       | L    | <b>1062.543448</b> | <b>531.775362</b> | 1045.516899 | 523.262088       |                |                  | 9  |
| 4  | <b>457.265676</b>  | 229.136476      |                   |                  | 439.255111     | 220.131194       | L    | <b>949.459384</b>  | 475.233330        | 932.432835  | 466.720056       |                |                  | 8  |
| 5  | 571.308603         | 286.157940      | <b>554.282054</b> | 277.644665       | 553.298038     | 277.152657       | N    | <b>836.375320</b>  | 418.691298        | 819.348771  | 410.178023       |                |                  | 7  |
| 6  | 670.377017         | 335.692147      | 653.350468        | 327.178872       | 652.366452     | 326.686864       | V    | <b>722.332393</b>  | 361.669835        | 705.305844  | 353.156560       |                |                  | 6  |
| 7  | <b>830.407666</b>  | 415.707471      | 813.381117        | 407.194197       | 812.397101     | 406.702189       | C    | <b>623.263979</b>  | 312.135628        | 606.237430  | 303.622353       |                |                  | 5  |
| 8  | <b>961.448151</b>  | 481.227714      | 944.421602        | 472.714439       | 943.437586     | 472.222431       | M    | <b>463.233330</b>  | 232.120303        | 446.206781  | 223.607028       |                |                  | 4  |
| 9  | <b>1075.491078</b> | 538.249177      | 1058.464529       | 529.735903       | 1057.480513    | 529.243895       | N    | <b>332.192845</b>  | 166.600060        | 315.166296  | 158.086786       |                |                  | 3  |
| 10 | <b>1146.528192</b> | 573.767734      | 1129.501643       | 565.254460       | 1128.517627    | 564.762452       | A    | <b>218.149918</b>  | 109.578597        | 201.123369  | 101.065322       |                |                  | 2  |
| 11 |                    |                 |                   |                  |                |                  | K    | 147.112804         | 74.060040         | 130.086255  | 65.546765        |                |                  | 1  |

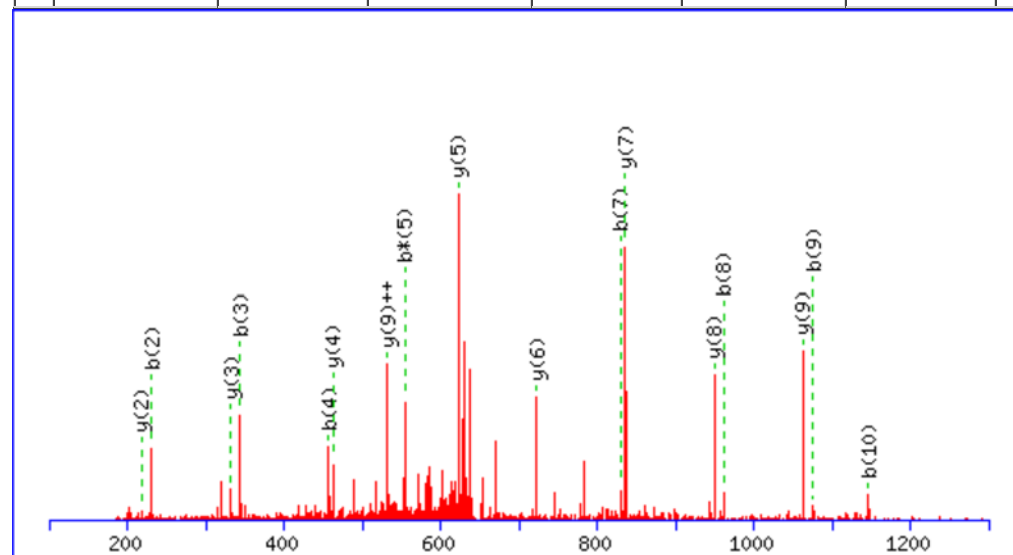

## Peptide View

MS/MS Fragmentation of **IVTSTYKDGKGAR**

Found in **IP100002745**, Tax\_Id=9606 Gene\_Symbol=CTSZ Cathepsin Z

**Experiment: 20 - NOPB2 Fraction: NOPB2**

Match to Query 7716: 1394.752448 from(698.383500,2+)

Title: OECHL100312\_09.2294.2294.2.dta

Data file \\BOROMIR\Masse\Data LTQ-Orbitrap\Chrystelle Lacroix\Etude clinique sJPU\OECHL100312\_09.raw

**Monoisotopic mass of neutral peptide Mr(calc): 1394.751770** **Fixed modifications:** Carbamidomethyl (C) (apply to specified residues or termini only) **Ions Score: 61**

**Expect: 5.4e-005** **Matches : 16/118** fragment ions using 24 most intense peaks ([help](#))

| #         | <b>b</b>           | <b>b<sup>++</sup></b> | <b>b*</b>   | <b>b<sup>*++</sup></b> | <b>b<sup>0</sup></b> | <b>b<sup>0++</sup></b> | Seq.     | <b>y</b>           | <b>y<sup>++</sup></b> | <b>y*</b>   | <b>y<sup>*++</sup></b> | <b>y<sup>0</sup></b> | <b>y<sup>0++</sup></b> | #         |
|-----------|--------------------|-----------------------|-------------|------------------------|----------------------|------------------------|----------|--------------------|-----------------------|-------------|------------------------|----------------------|------------------------|-----------|
| <b>1</b>  | 114.091340         | 57.549308             |             |                        |                      |                        | <b>I</b> |                    |                       |             |                        |                      |                        | <b>13</b> |
| <b>2</b>  | <b>213.159754</b>  | 107.083515            |             |                        |                      |                        | <b>V</b> | 1282.674992        | 641.841134            | 1265.648443 | 633.327860             | 1264.664427          | 632.835851             | <b>12</b> |
| <b>3</b>  | <b>314.207433</b>  | 157.607354            |             |                        | 296.196868           | 148.602072             | <b>T</b> | <b>1183.606578</b> | <b>592.306927</b>     | 1166.580029 | 583.793653             | 1165.596013          | 583.301644             | <b>11</b> |
| <b>4</b>  | 401.239461         | 201.123368            |             |                        | 383.228896           | 192.118086             | <b>S</b> | <b>1082.558899</b> | <b>541.783087</b>     | 1065.532350 | 533.269813             | 1064.548334          | 532.777805             | <b>10</b> |
| <b>5</b>  | 502.287140         | 251.647208            |             |                        | 484.276575           | 242.641925             | <b>T</b> | <b>995.526871</b>  | 498.267073            | 978.500322  | <b>489.753799</b>      | 977.516306           | <b>489.261791</b>      | <b>9</b>  |
| <b>6</b>  | 665.350469         | 333.178873            |             |                        | 647.339904           | 324.173590             | <b>Y</b> | <b>894.479192</b>  | 447.743234            | 877.452643  | 439.229959             | 876.468627           | 438.737951             | <b>8</b>  |
| <b>7</b>  | 793.445432         | 397.226354            | 776.418883  | 388.713079             | 775.434867           | 388.221071             | <b>K</b> | <b>731.415863</b>  | 366.211570            | 714.389314  | 357.698295             | 713.405298           | 357.206287             | <b>7</b>  |
| <b>8</b>  | <b>908.472375</b>  | 454.739825            | 891.445826  | 446.226551             | 890.461810           | 445.734543             | <b>D</b> | 603.320900         | 302.164088            | 586.294351  | 293.650813             | 585.310335           | 293.158805             | <b>6</b>  |
| <b>9</b>  | 965.493839         | 483.250558            | 948.467290  | 474.737283             | 947.483274           | 474.245275             | <b>G</b> | <b>488.293957</b>  | 244.650616            | 471.267408  | 236.137342             |                      |                        | <b>5</b>  |
| <b>10</b> | 1093.588802        | 547.298039            | 1076.562253 | 538.784765             | 1075.578237          | 538.292757             | <b>K</b> | 431.272493         | 216.139884            | 414.245944  | 207.626610             |                      |                        | <b>4</b>  |
| <b>11</b> | 1150.610266        | 575.808771            | 1133.583717 | 567.295497             | 1132.599701          | 566.803488             | <b>G</b> | <b>303.177530</b>  | 152.092403            | 286.150981  | 143.579128             |                      |                        | <b>3</b>  |
| <b>12</b> | <b>1221.647380</b> | 611.327328            | 1204.620831 | 602.814054             | 1203.636815          | 602.322045             | <b>A</b> | <b>246.156066</b>  | 123.581671            | 229.129517  | 115.068396             |                      |                        | <b>2</b>  |
| <b>13</b> |                    |                       |             |                        |                      |                        | <b>R</b> | 175.118952         | 88.063114             | 158.092403  | 79.549839              |                      |                        | <b>1</b>  |



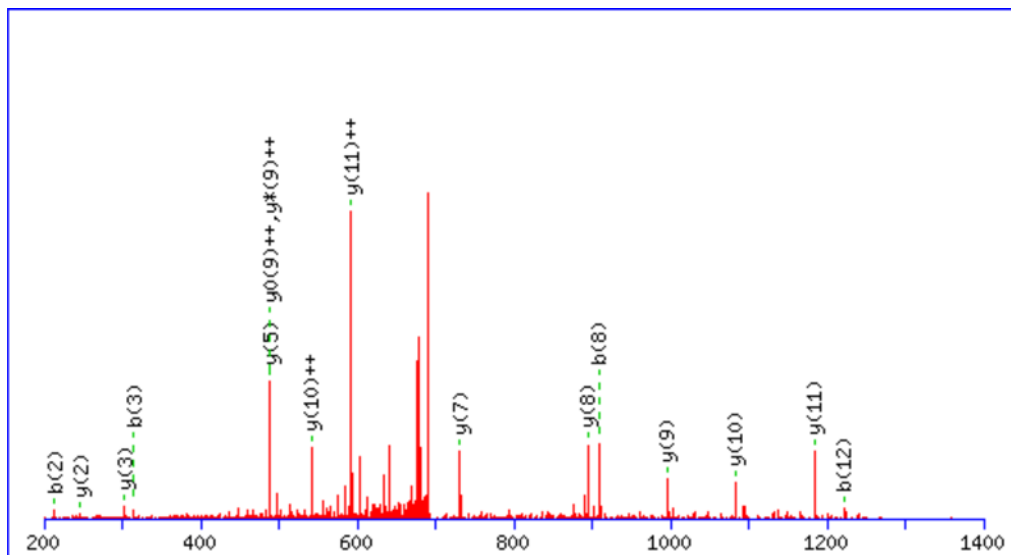

## Peptide View

MS/MS Fragmentation of **SSAGNAPCSPCAR**

Found in **IPI00005222**, Tax\_Id=9606 Gene\_Symbol=EPHB6 ephrin receptor EphB6 precursor

**Experiment:** 20 - NOPB2 **Fraction:** NOPB2

Match to Query 8033: 1430.604048 from(716.309300,2+)

Title: OECHL100312\_09.2963.2963.2.dta

Data file \\BOROMIR\Masse\Data LTQ-Orbitrap\Chrystelle Lacroix\Etude clinique sJPU\OECHL100312\_09.raw

**Monoisotopic mass of neutral peptide Mr(calc):** 1430.603073 **Fixed modifications:** Carbamidomethyl (C) (apply to specified residues or termini only) **Ions Score:** 61

**Expect:** 2.2e-005 **Matches :** 23/138 fragment ions using 36 most intense peaks ([help](#))

| # | b                 | b <sup>++</sup> | b <sup>*</sup>    | b <sup>*++</sup> | b <sup>0</sup> | b <sup>0++</sup> | Seq. | y                  | y <sup>++</sup>   | y <sup>*</sup> | y <sup>*++</sup> | y <sup>0</sup>    | y <sup>0++</sup> | #  |
|---|-------------------|-----------------|-------------------|------------------|----------------|------------------|------|--------------------|-------------------|----------------|------------------|-------------------|------------------|----|
| 1 | 88.039304         | 44.523290       |                   |                  | 70.028739      | 35.518008        | S    |                    |                   |                |                  |                   |                  | 14 |
| 2 | 175.071332        | 88.039304       |                   |                  | 157.060767     | 79.034021        | S    | 1344.578331        | 672.792803        | 1327.551782    | 664.279529       | 1326.567766       | 663.787521       | 13 |
| 3 | 246.108446        | 123.557861      |                   |                  | 228.097881     | 114.552578       | A    | <b>1257.546303</b> | <b>629.276790</b> | 1240.519754    | 620.763515       | 1239.535738       | 620.271507       | 12 |
| 4 | 303.129910        | 152.068593      |                   |                  | 285.119345     | 143.063311       | G    | <b>1186.509189</b> | <b>593.758233</b> | 1169.482640    | 585.244958       | 1168.498624       | 584.752950       | 11 |
| 5 | 417.172837        | 209.090057      | <b>400.146288</b> | 200.576782       | 399.162272     | 200.084774       | N    | <b>1129.487725</b> | 565.247501        | 1112.461176    | 556.734226       | 1111.477160       | 556.242218       | 10 |
| 6 | <b>488.209951</b> | 244.608613      | <b>471.183402</b> | 236.095339       | 470.199386     | 235.603331       | A    | <b>1015.444798</b> | 508.226037        | 998.418249     | 499.712763       | <b>997.434233</b> | 499.220755       | 9  |

|    |             |            |             |            |             |            |   |            |            |            |            |            |            |   |
|----|-------------|------------|-------------|------------|-------------|------------|---|------------|------------|------------|------------|------------|------------|---|
| 7  | 585.262715  | 293.134996 | 568.236166  | 284.621721 | 567.252150  | 284.129713 | P | 944.407684 | 472.707480 | 927.381135 | 464.194206 | 926.397119 | 463.702198 | 8 |
| 8  | 745.293364  | 373.150320 | 728.266815  | 364.637046 | 727.282799  | 364.145038 | C | 847.354920 | 424.181098 | 830.328371 | 415.667824 | 829.344355 | 415.175816 | 7 |
| 9  | 832.325392  | 416.666334 | 815.298843  | 408.153060 | 814.314827  | 407.661052 | S | 687.324271 | 344.165774 | 670.297722 | 335.652499 | 669.313706 | 335.160491 | 6 |
| 10 | 929.378156  | 465.192716 | 912.351607  | 456.679442 | 911.367591  | 456.187434 | P | 600.292243 | 300.649760 | 583.265694 | 292.136485 |            |            | 5 |
| 11 | 1089.408805 | 545.208041 | 1072.382256 | 536.694766 | 1071.398240 | 536.202758 | C | 503.239479 | 252.123377 | 486.212930 | 243.610103 |            |            | 4 |
| 12 | 1186.461569 | 593.734423 | 1169.435020 | 585.221148 | 1168.451004 | 584.729140 | P | 343.208830 | 172.108053 | 326.182281 | 163.594778 |            |            | 3 |
| 13 | 1257.498683 | 629.252980 | 1240.472134 | 620.739705 | 1239.488118 | 620.247697 | A | 246.156066 | 123.581671 | 229.129517 | 115.068396 |            |            | 2 |
| 14 |             |            |             |            |             |            | R | 175.118952 | 88.063114  | 158.092403 | 79.549839  |            |            | 1 |

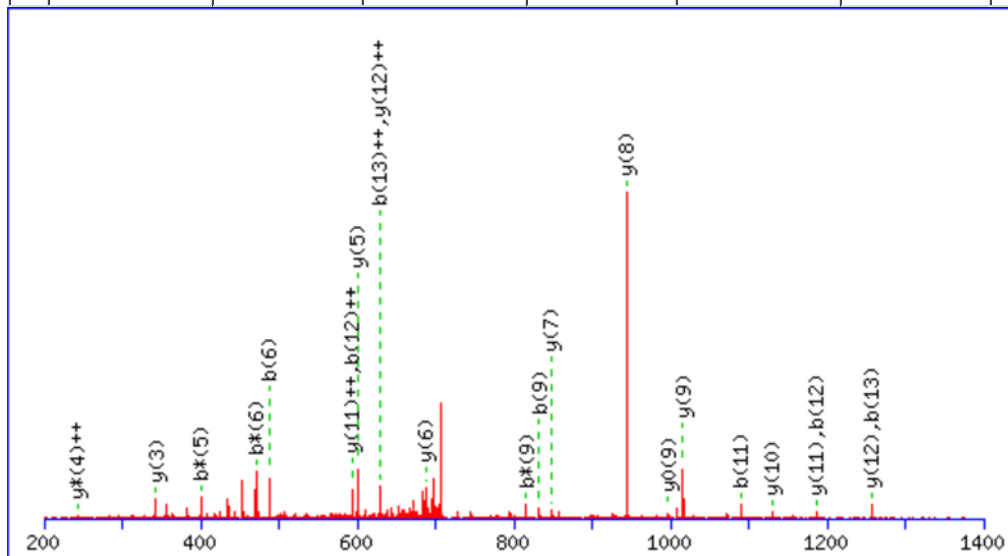

## Peptide View

MS/MS Fragmentation of **ARDDCEPLMK**

Found in **IP100017557**, Tax\_Id=9606 Gene\_Symbol=SFRP4 Secreted frizzled-related protein 4

**Experiment:** 20 - NOPB2 **Fraction:** NOPB2

Match to Query 5826: 1233.548848 from(617.781700,2+)

Title: OECHL100312\_09.5001.5001.2.dta

Data file \\BOROMIR\Masse\Data LTQ-Orbitrap\Chrystelle Lacroix\Etude clinique sJPU\OECHL100312\_09.raw

**Monoisotopic mass of neutral peptide Mr(calc):** 1233.548172 **Fixed modifications:** Carbamidomethyl (C) (apply to specified residues or termini only) **Ions Score:** 54

**Expect:** 0.00026**Matches :** 9/94 fragment ions using 11 most intense peaks ([help](#))

| #  | b                  | b <sup>++</sup> | b*          | b <sup>*++</sup> | b <sup>0</sup> | b <sup>0++</sup> | Seq. | y                  | y <sup>++</sup> | y*          | y <sup>*++</sup> | y <sup>0</sup> | y <sup>0++</sup> | #  |
|----|--------------------|-----------------|-------------|------------------|----------------|------------------|------|--------------------|-----------------|-------------|------------------|----------------|------------------|----|
| 1  | 72.044390          | 36.525833       |             |                  |                |                  | A    |                    |                 |             |                  |                |                  | 10 |
| 2  | 228.145501         | 114.576388      | 211.118952  | 106.063114       |                |                  | R    | 1163.518356        | 582.262816      | 1146.491807 | 573.749542       | 1145.507791    | 573.257534       | 9  |
| 3  | <b>343.172444</b>  | 172.089860      | 326.145895  | 163.576585       | 325.161879     | 163.084577       | D    | <b>1007.417245</b> | 504.212261      | 990.390696  | 495.698986       | 989.406680     | 495.206978       | 8  |
| 4  | <b>458.199387</b>  | 229.603332      | 441.172838  | 221.090057       | 440.188822     | 220.598049       | D    | 892.390302         | 446.698789      | 875.363753  | 438.185515       | 874.379737     | 437.693507       | 7  |
| 5  | 618.230036         | 309.618656      | 601.203487  | 301.105382       | 600.219471     | 300.613374       | C    | 777.363359         | 389.185318      | 760.336810  | 380.672043       | 759.352794     | 380.180035       | 6  |
| 6  | <b>747.272629</b>  | 374.139953      | 730.246080  | 365.626678       | 729.262064     | 365.134670       | E    | 617.332710         | 309.169993      | 600.306161  | 300.656719       | 599.322145     | 300.164711       | 5  |
| 7  | <b>844.325393</b>  | 422.666335      | 827.298844  | 414.153060       | 826.314828     | 413.661052       | P    | <b>488.290117</b>  | 244.648696      | 471.263568  | 236.135422       |                |                  | 4  |
| 8  | <b>957.409457</b>  | 479.208367      | 940.382908  | 470.695092       | 939.398892     | 470.203084       | L    | 391.237353         | 196.122314      | 374.210804  | 187.609040       |                |                  | 3  |
| 9  | <b>1088.449942</b> | 544.728609      | 1071.423393 | 536.215335       | 1070.439377    | 535.723326       | M    | <b>278.153289</b>  | 139.580282      | 261.126740  | 131.067008       |                |                  | 2  |
| 10 |                    |                 |             |                  |                |                  | K    | 147.112804         | 74.060040       | 130.086255  | 65.546765        |                |                  | 1  |

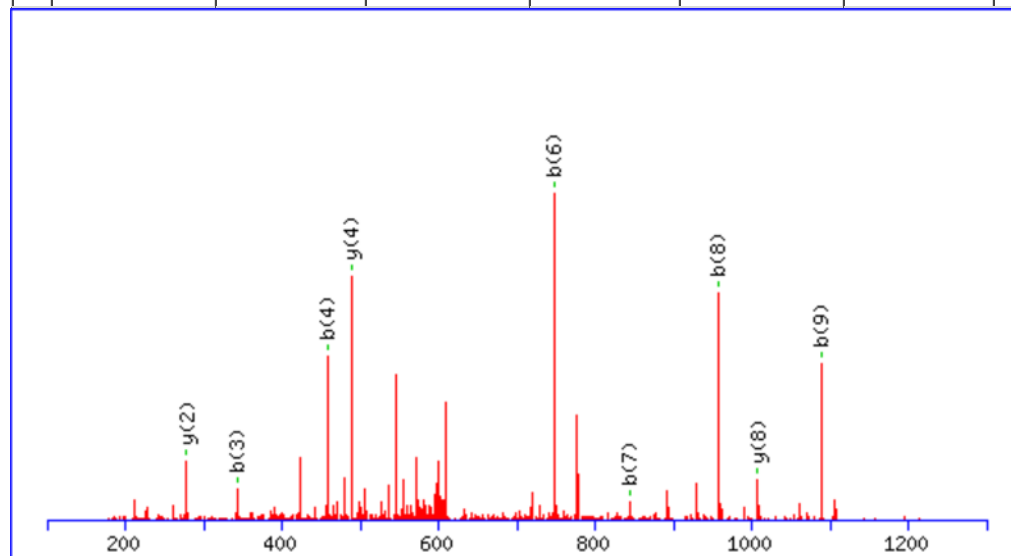

## Peptide View

MS/MS Fragmentation of **DFSLTSSSQTPGATK**

Found in **IPI00291300**, Tax\_Id=9606 Gene\_Symbol=PODXL2 Putative uncharacterized protein PODXL2

**Experiment:** 20 - NOPB2 **Fraction:** NOPB2

Match to Query 8895: 1525.726448 from(763.870500,2+)

Title: OECHL100312\_09.10382.10382.2.dta

Data file \\BOROMIR\Masse\Data LTQ-Orbitrap\Chrystelle Lacroix\Etude clinique sJPU\OECHL100312\_09.raw

**Monoisotopic mass of neutral peptide Mr(calc): 1525.726028**Fixed modifications: Carbamidomethyl (C) (apply to specified residues or termini only)**Ions Score: 57****Expect: 0.00025**Matches : 34/150 fragment ions using 63 most intense peaks ([help](#))

| #  | b                  | b <sup>++</sup> | b*                 | b <sup>***</sup> | b <sup>0</sup>     | b <sup>0++</sup> | Seq. | y                  | y <sup>++</sup>   | y*                | y <sup>***</sup>  | y <sup>0</sup>    | y <sup>0++</sup>  | #  |
|----|--------------------|-----------------|--------------------|------------------|--------------------|------------------|------|--------------------|-------------------|-------------------|-------------------|-------------------|-------------------|----|
| 1  | 116.034219         | 58.520748       |                    |                  | 98.023654          | 49.515465        | D    |                    |                   |                   |                   |                   |                   | 15 |
| 2  | <b>263.102633</b>  | 132.054954      |                    |                  | 245.092068         | 123.049672       | F    | 1411.706351        | 706.356813        | 1394.679802       | 697.843539        | 1393.695786       | 697.351531        | 14 |
| 3  | <b>350.134661</b>  | 175.570968      |                    |                  | <b>332.124096</b>  | 166.565686       | S    | 1264.637937        | <b>632.822607</b> | 1247.611388       | <b>624.309332</b> | 1246.627372       | <b>623.817324</b> | 13 |
| 4  | 463.218725         | 232.113001      |                    |                  | <b>445.208160</b>  | 223.107718       | L    | <b>1177.605909</b> | <b>589.306592</b> | 1160.579360       | 580.793318        | 1159.595344       | 580.301310        | 12 |
| 5  | <b>564.266404</b>  | 282.636840      |                    |                  | <b>546.255839</b>  | 273.631558       | T    | <b>1064.521845</b> | 532.764561        | 1047.495296       | 524.251286        | 1046.511280       | 523.759278        | 11 |
| 6  | 651.298432         | 326.152854      |                    |                  | <b>633.287867</b>  | 317.147572       | S    | <b>963.474166</b>  | 482.240721        | 946.447617        | <b>473.727446</b> | 945.463601        | <b>473.235438</b> | 10 |
| 7  | 738.330460         | 369.668868      |                    |                  | <b>720.319895</b>  | 360.663586       | S    | <b>876.442138</b>  | 438.724707        | 859.415589        | 430.211432        | 858.431573        | 429.719424        | 9  |
| 8  | 825.362488         | 413.184882      |                    |                  | 807.351923         | 404.179599       | S    | <b>789.410110</b>  | 395.208693        | 772.383561        | 386.695418        | 771.399545        | 386.203410        | 8  |
| 9  | <b>953.421066</b>  | 477.214171      | 936.394517         | 468.700897       | 935.410501         | 468.208889       | Q    | <b>702.378082</b>  | 351.692679        | <b>685.351533</b> | 343.179404        | 684.367517        | 342.687396        | 7  |
| 10 | <b>1054.468745</b> | 527.738010      | 1037.442196        | 519.224736       | <b>1036.458180</b> | 518.732728       | T    | <b>574.319504</b>  | 287.663390        | 557.292955        | 279.150115        | 556.308939        | 278.658107        | 6  |
| 11 | 1151.521509        | 576.264392      | 1134.494960        | 567.751118       | 1133.510944        | 567.259110       | P    | <b>473.271825</b>  | 237.139550        | 456.245276        | 228.626276        | <b>455.261260</b> | 228.134268        | 5  |
| 12 | <b>1208.542973</b> | 604.775124      | 1191.516424        | 596.261850       | 1190.532408        | 595.769842       | G    | 376.219061         | 188.613168        | 359.192512        | 180.099894        | 358.208496        | 179.607886        | 4  |
| 13 | <b>1279.580087</b> | 640.293681      | <b>1262.553538</b> | 631.780407       | 1261.569522        | 631.288399       | A    | <b>319.197597</b>  | 160.102436        | 302.171048        | 151.589162        | 301.187032        | 151.097154        | 3  |
| 14 | <b>1380.627766</b> | 690.817521      | 1363.601217        | 682.304246       | <b>1362.617201</b> | 681.812238       | T    | <b>248.160483</b>  | 124.583879        | 231.133934        | 116.070605        | 230.149918        | 115.578597        | 2  |
| 15 |                    |                 |                    |                  |                    |                  | K    | 147.112804         | 74.060040         | 130.086255        | 65.546765         |                   |                   | 1  |

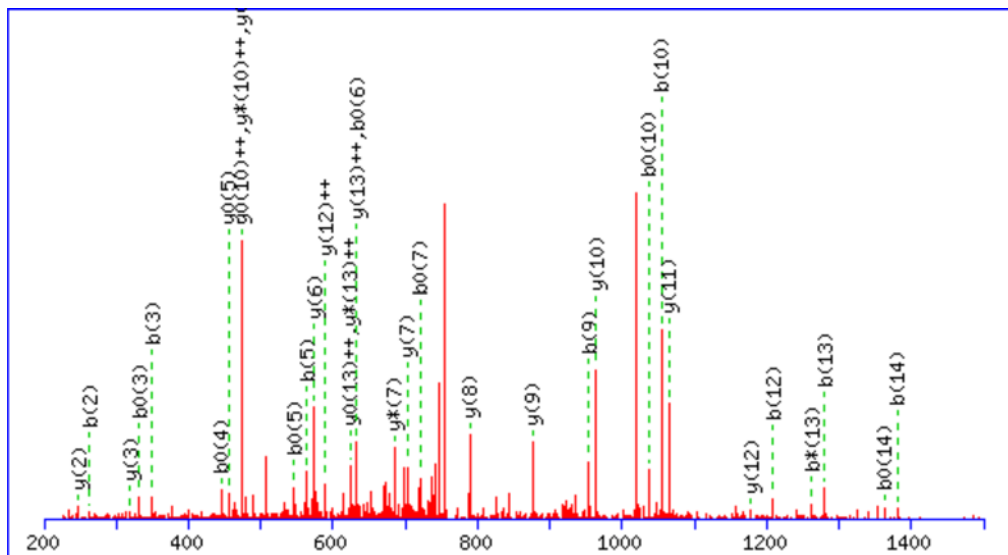

## Peptide View

MS/MS Fragmentation of **ALVQIVK**

Found in **IPI00216569**, Tax\_Id=9606 Gene\_Symbol=CST7 Cystatin-F precursor

**Experiment:** 20 - NOPB2 **Fraction:** NOPB2

Match to Query 575: 770.489648 from(386.252100,2+)

Title: OECHL100312\_09.11311.11311.2.dta

Data file \\BOROMIR\Masse\Data LTQ-Orbitrap\Chrystelle Lacroix\Etude clinique sJPU\OECHL100312\_09.raw

**Monoisotopic mass of neutral peptide Mr(calc):** 770.490173 **Fixed modifications:** Carbamidomethyl (C) (apply to specified residues or termini only) **Variable modifications:** Q4 : Deamidated (NQ) **Ions Score:** 53 **Expect:** 0.00021 **Matches :** 12/42 fragment ions using 19 most intense peaks ([help](#))

| # | b                 | b <sup>++</sup> | b*         | b <sup>*++</sup> | Seq. | y                 | y <sup>++</sup>   | y*         | y <sup>*++</sup> | # |
|---|-------------------|-----------------|------------|------------------|------|-------------------|-------------------|------------|------------------|---|
| 1 | 72.044390         | 36.525833       |            |                  | A    |                   |                   |            |                  | 7 |
| 2 | <b>185.128454</b> | 93.067865       |            |                  | L    | <b>700.460354</b> | <b>350.733815</b> | 683.433805 | 342.220541       | 6 |
| 3 | <b>284.196868</b> | 142.602072      |            |                  | V    | <b>587.376290</b> | <b>294.191783</b> | 570.349741 | 285.678509       | 5 |
| 4 | 413.239462        | 207.123369      | 396.212913 | 198.610095       | Q    | <b>488.307876</b> | 244.657576        | 471.281327 | 236.144301       | 4 |
| 5 | <b>526.323526</b> | 263.665401      | 509.296977 | 255.152127       | I    | <b>359.265282</b> | 180.136279        | 342.238733 | 171.623004       | 3 |
| 6 | <b>625.391940</b> | 313.199608      | 608.365391 | 304.686333       | V    | <b>246.181218</b> | 123.594247        | 229.154669 | 115.080972       | 2 |

|   |  |  |  |  |          |                   |           |            |           |          |
|---|--|--|--|--|----------|-------------------|-----------|------------|-----------|----------|
| 7 |  |  |  |  | <b>K</b> | <b>147.112804</b> | 74.060040 | 130.086255 | 65.546765 | <b>1</b> |
|---|--|--|--|--|----------|-------------------|-----------|------------|-----------|----------|

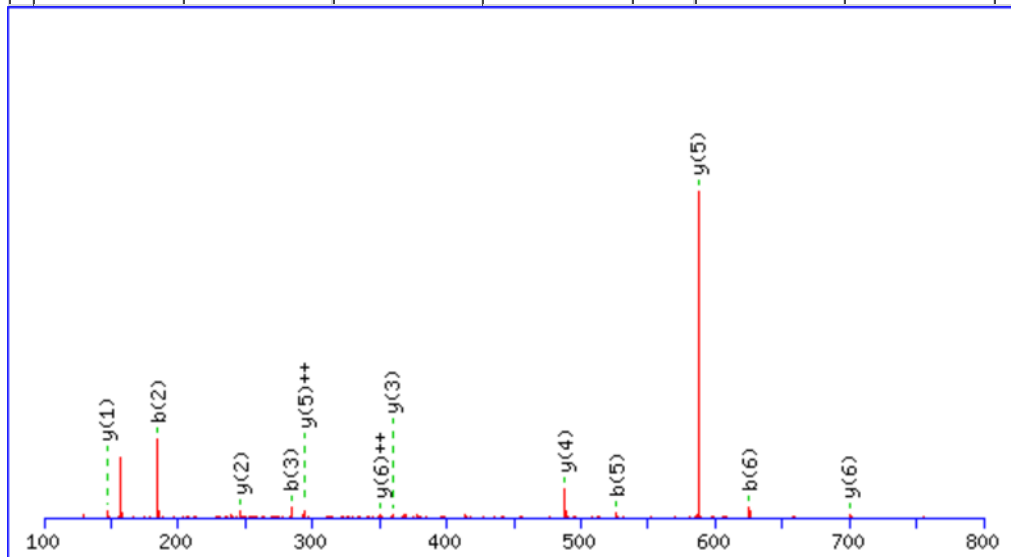

## Peptide View

MS/MS Fragmentation of **AHGQESAI FNEVAPGYFSR**

Found in **IPI00170635**, Tax\_Id=9606 Gene\_Symbol=SECTM1 Secreted and transmembrane protein 1

**Experiment:** 08 - S\_C-2 **Fraction:** S\_C-2

Match to Query 12536: 2078.983448 from(1040.499000,2+)

Title: OECHL100312\_05.15741.15741.2.dta

Data file \\BOROMIR\Masse\Data LTQ-Orbitrap\Chrystelle Lacroix\Etude clinique sJPU\OECHL100312\_05.raw

**Monoisotopic mass of neutral peptide Mr(calc):** 2078.980988 **Fixed modifications:** Carbamidomethyl (C) (apply to specified residues or termini only) **Ions Score:** 95

**Expect:** 5.2e-008 **Matches :** 30/200 fragment ions using 51 most intense peaks ([help](#))

| #        | b                 | b <sup>++</sup> | b <sup>*</sup> | b <sup>*++</sup> | b <sup>0</sup> | b <sup>0++</sup> | Seq.     | y                  | y <sup>++</sup> | y <sup>*</sup> | y <sup>*++</sup> | y <sup>0</sup> | y <sup>0++</sup> | #         |
|----------|-------------------|-----------------|----------------|------------------|----------------|------------------|----------|--------------------|-----------------|----------------|------------------|----------------|------------------|-----------|
| <b>1</b> | 72.044390         | 36.525833       |                |                  |                |                  | <b>A</b> |                    |                 |                |                  |                |                  | <b>19</b> |
| <b>2</b> | 209.103302        | 105.055289      |                |                  |                |                  | <b>H</b> | 2008.951166        | 1004.979221     | 1991.924617    | 996.465947       | 1990.940601    | 995.973939       | <b>18</b> |
| <b>3</b> | 266.124766        | 133.566021      |                |                  |                |                  | <b>G</b> | <b>1871.892254</b> | 936.449765      | 1854.865705    | 927.936491       | 1853.881689    | 927.444483       | <b>17</b> |
| <b>4</b> | <b>394.183344</b> | 197.595310      | 377.156795     | 189.082035       |                |                  | <b>Q</b> | 1814.870790        | 907.939033      | 1797.844241    | 899.425759       | 1796.860225    | 898.933751       | <b>16</b> |
| <b>5</b> | <b>523.225937</b> | 262.116607      | 506.199388     | 253.603332       | 505.215372     | 253.111324       | <b>E</b> | <b>1686.812212</b> | 843.909744      | 1669.785663    | 835.396470       | 1668.801647    | 834.904462       | <b>15</b> |

|    |                    |                   |                    |            |             |            |   |                    |            |             |                   |             |                   |    |
|----|--------------------|-------------------|--------------------|------------|-------------|------------|---|--------------------|------------|-------------|-------------------|-------------|-------------------|----|
| 6  | <b>610.257965</b>  | 305.632621        | 593.231416         | 297.119346 | 592.247400  | 296.627338 | S | <b>1557.769619</b> | 779.388448 | 1540.743070 | 770.875173        | 1539.759054 | 770.383165        | 14 |
| 7  | <b>681.295079</b>  | <b>341.151178</b> | 664.268530         | 332.637903 | 663.284514  | 332.145895 | A | <b>1470.737591</b> | 735.872434 | 1453.711042 | <b>727.359159</b> | 1452.727026 | <b>726.867151</b> | 13 |
| 8  | <b>794.379143</b>  | 397.693210        | 777.352594         | 389.179935 | 776.368578  | 388.687927 | I | <b>1399.700477</b> | 700.353877 | 1382.673928 | 691.840602        | 1381.689912 | 691.348594        | 12 |
| 9  | <b>941.447557</b>  | 471.227417        | 924.421008         | 462.714142 | 923.436992  | 462.222134 | F | <b>1286.616413</b> | 643.811845 | 1269.589864 | 635.298570        | 1268.605848 | 634.806562        | 11 |
| 10 | 1055.490484        | 528.248880        | 1038.463935        | 519.735606 | 1037.479919 | 519.243597 | N | <b>1139.547999</b> | 570.277638 | 1122.521450 | 561.764363        | 1121.537434 | 561.272355        | 10 |
| 11 | <b>1184.533077</b> | 592.770176        | 1167.506528        | 584.256902 | 1166.522512 | 583.764894 | E | <b>1025.505072</b> | 513.256174 | 1008.478523 | 504.742900        | 1007.494507 | 504.250892        | 9  |
| 12 | <b>1283.601491</b> | 642.304383        | 1266.574942        | 633.791109 | 1265.590926 | 633.299101 | V | <b>896.462479</b>  | 448.734878 | 879.435930  | 440.221603        | 878.451914  | 439.729595        | 8  |
| 13 | <b>1354.638605</b> | 677.822940        | <b>1337.612056</b> | 669.309666 | 1336.628040 | 668.817658 | A | <b>797.394065</b>  | 399.200671 | 780.367516  | 390.687396        | 779.383500  | 390.195388        | 7  |
| 14 | 1451.691369        | <b>726.349322</b> | 1434.664820        | 717.836048 | 1433.680804 | 717.344040 | P | <b>726.356951</b>  | 363.682114 | 709.330402  | 355.168839        | 708.346386  | 354.676831        | 6  |
| 15 | 1508.712833        | 754.860054        | 1491.686284        | 746.346780 | 1490.702268 | 745.854772 | G | <b>629.304187</b>  | 315.155732 | 612.277638  | 306.642457        | 611.293622  | 306.150449        | 5  |
| 16 | <b>1671.776162</b> | 836.391719        | 1654.749613        | 827.878445 | 1653.765597 | 827.386436 | Y | <b>572.282723</b>  | 286.645000 | 555.256174  | 278.131725        | 554.272158  | 277.639717        | 4  |
| 17 | 1818.844576        | 909.925926        | 1801.818027        | 901.412652 | 1800.834011 | 900.920643 | F | <b>409.219394</b>  | 205.113335 | 392.192845  | 196.600061        | 391.208829  | 196.108053        | 3  |
| 18 | <b>1905.876604</b> | 953.441940        | 1888.850055        | 944.928666 | 1887.866039 | 944.436658 | S | 262.150980         | 131.579128 | 245.124431  | 123.065854        | 244.140415  | 122.573846        | 2  |
| 19 |                    |                   |                    |            |             |            | R | 175.118952         | 88.063114  | 158.092403  | 79.549840         |             |                   | 1  |

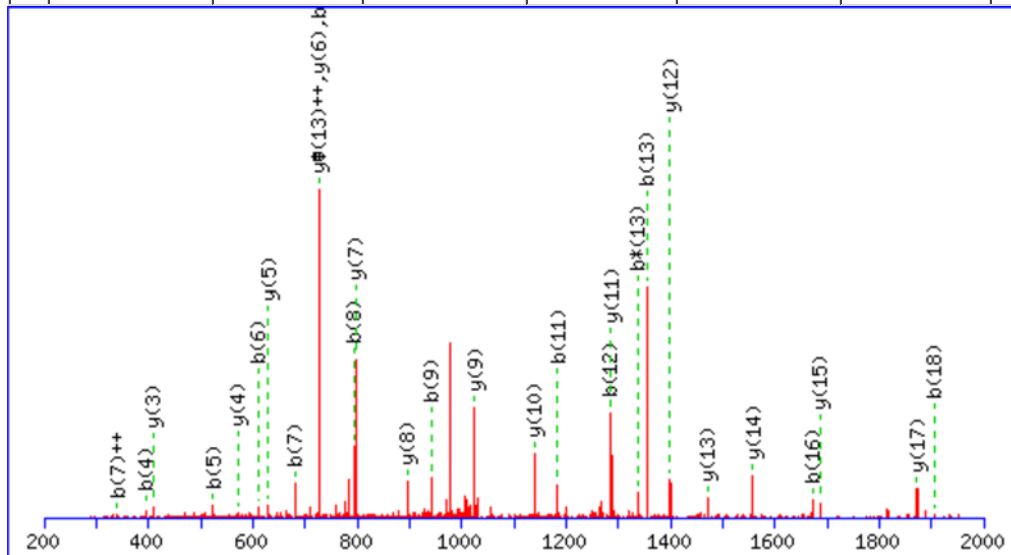

## Peptide View

MS/MS Fragmentation of **LLETECPQYIR**Found in **IPI00007047**, Tax\_Id=9606 Gene\_Symbol=S100A8 Protein S100-A8**Experiment:** 08 - S\_C-2 **Fraction:** S\_C-2

Match to Query 8250: 1420.701448 from(711.358000,2+)

Title: OECHL100312\_05.11194.11194.2.dta

Data file \\BOROMIR\Masse\Data LTQ-Orbitrap\Chrystelle Lacroix\Etude clinique sJPU\OECHL100312\_05.raw

**Monoisotopic mass of neutral peptide Mr(calc):** 1420.702026**Fixed modifications:** Carbamidomethyl (C) (apply to specified residues or termini only)**Ions Score:** 70**Expect:** 1.4e-005**Matches :** 17/90 fragment ions using 24 most intense peaks ([help](#))

| #  | b                  | b <sup>++</sup> | b <sup>*</sup> | b <sup>*++</sup> | b <sup>0</sup> | b <sup>0++</sup> | Seq. | y                  | y <sup>++</sup>   | y <sup>*</sup> | y <sup>*++</sup> | y <sup>0</sup> | y <sup>0++</sup> | #  |
|----|--------------------|-----------------|----------------|------------------|----------------|------------------|------|--------------------|-------------------|----------------|------------------|----------------|------------------|----|
| 1  | 114.091340         | 57.549308       |                |                  |                |                  | L    |                    |                   |                |                  |                |                  | 11 |
| 2  | <b>227.175404</b>  | 114.091340      |                |                  |                |                  | L    | <b>1308.625265</b> | 654.816271        | 1291.598716    | 646.302996       | 1290.614700    | 645.810988       | 10 |
| 3  | <b>356.217997</b>  | 178.612637      |                |                  | 338.207432     | 169.607354       | E    | <b>1195.541201</b> | <b>598.274239</b> | 1178.514652    | 589.760964       | 1177.530636    | 589.268956       | 9  |
| 4  | <b>457.265676</b>  | 229.136476      |                |                  | 439.255111     | 220.131194       | T    | <b>1066.498608</b> | 533.752942        | 1049.472059    | 525.239668       | 1048.488043    | 524.747660       | 8  |
| 5  | <b>586.308269</b>  | 293.657773      |                |                  | 568.297704     | 284.652490       | E    | <b>965.450929</b>  | 483.229103        | 948.424380     | 474.715828       | 947.440364     | 474.223820       | 7  |
| 6  | <b>746.338918</b>  | 373.673097      |                |                  | 728.328353     | 364.667815       | C    | <b>836.408336</b>  | 418.707806        | 819.381787     | 410.194531       |                |                  | 6  |
| 7  | 843.391682         | 422.199479      |                |                  | 825.381117     | 413.194197       | P    | <b>676.377687</b>  | 338.692481        | 659.351138     | 330.179207       |                |                  | 5  |
| 8  | <b>971.450260</b>  | 486.228768      | 954.423711     | 477.715494       | 953.439695     | 477.223486       | Q    | 579.324923         | 290.166099        | 562.298374     | 281.652825       |                |                  | 4  |
| 9  | <b>1134.513589</b> | 567.760433      | 1117.487040    | 559.247158       | 1116.503024    | 558.755150       | Y    | <b>451.266345</b>  | 226.136810        | 434.239796     | 217.623536       |                |                  | 3  |
| 10 | <b>1247.597653</b> | 624.302465      | 1230.571104    | 615.789190       | 1229.587088    | 615.297182       | I    | <b>288.203016</b>  | 144.605146        | 271.176467     | 136.091871       |                |                  | 2  |
| 11 |                    |                 |                |                  |                |                  | R    | 175.118952         | 88.063114         | 158.092403     | 79.549839        |                |                  | 1  |



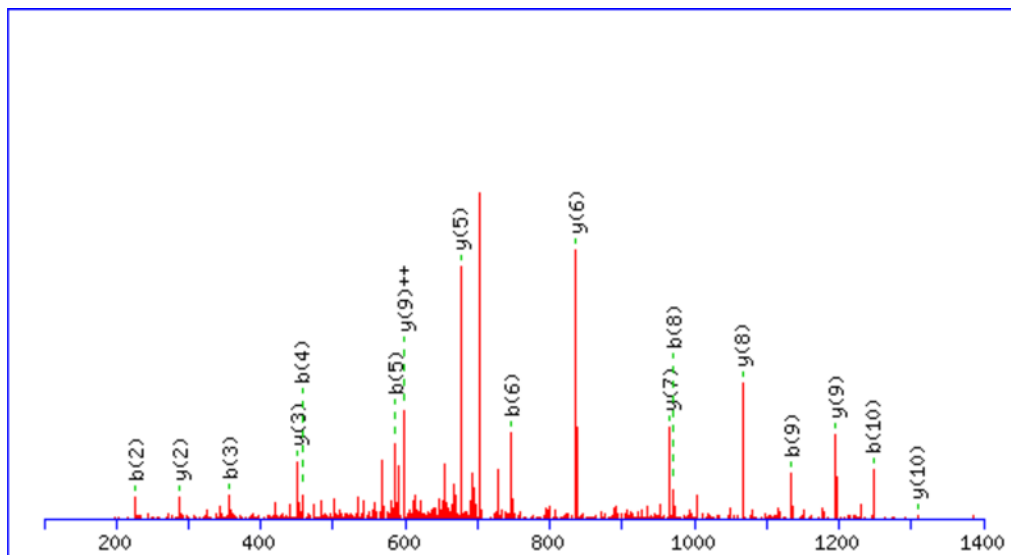

## Peptide View

MS/MS Fragmentation of **NPVLQQDAHSSVTITPQR**

Found in **IPI00410488**, Tax\_Id=9606 Gene\_Symbol=CD276 Isoform 1 of CD276 antigen

**Experiment:** 08 - S\_C-2 **Fraction:** S\_C-2

Match to Query 12196: 1990.024048 from(996.019300,2+)

Title: OECHL100312\_05.8946.8946.2.dta

Data file \\BOROMIR\Masse\Data LTQ-Orbitrap\Chrystelle Lacroix\Etude clinique sJPU\OECHL100312\_05.raw

**Monoisotopic mass of neutral peptide Mr(calc):** 1990.023209 **Fixed modifications:** Carbamidomethyl (C) (apply to specified residues or termini only) **Ions Score:** 86

**Expect:** 3.4e-007 **Matches :** 59/186 fragment ions using 112 most intense peaks ([help](#))

| # | b                 | b <sup>++</sup> | b*                | b* <sup>++</sup> | b <sup>0</sup> | b <sup>0++</sup> | Seq. | y                  | y <sup>++</sup>   | y*                 | y* <sup>++</sup>  | y <sup>0</sup> | y <sup>0++</sup> | #  |
|---|-------------------|-----------------|-------------------|------------------|----------------|------------------|------|--------------------|-------------------|--------------------|-------------------|----------------|------------------|----|
| 1 | 115.050203        | 58.028740       | 98.023654         | 49.515465        |                |                  | N    |                    |                   |                    |                   |                |                  | 18 |
| 2 | 212.102967        | 106.555121      | 195.076418        | 98.041847        |                |                  | P    | 1876.987553        | 938.997415        | 1859.961004        | 930.484140        | 1858.976988    | 929.992132       | 17 |
| 3 | <b>311.171381</b> | 156.089328      | <b>294.144832</b> | 147.576054       |                |                  | V    | <b>1779.934789</b> | <b>890.471033</b> | 1762.908240        | 881.957758        | 1761.924224    | 881.465750       | 16 |
| 4 | <b>424.255445</b> | 212.631361      | <b>407.228896</b> | 204.118086       |                |                  | L    | <b>1680.866375</b> | <b>840.936826</b> | <b>1663.839826</b> | 832.423551        | 1662.855810    | 831.931543       | 15 |
| 5 | <b>552.314023</b> | 276.660650      | <b>535.287474</b> | 268.147375       |                |                  | Q    | <b>1567.782311</b> | <b>784.394794</b> | 1550.755762        | <b>775.881519</b> | 1549.771746    | 775.389511       | 14 |
| 6 | <b>680.372601</b> | 340.689939      | <b>663.346052</b> | 332.176664       |                |                  | Q    | <b>1439.723733</b> | 720.365505        | 1422.697184        | 711.852230        | 1421.713168    | 711.360222       | 13 |

|    |                    |                   |                    |                   |                    |                   |          |                    |                   |                   |                   |                    |                   |           |
|----|--------------------|-------------------|--------------------|-------------------|--------------------|-------------------|----------|--------------------|-------------------|-------------------|-------------------|--------------------|-------------------|-----------|
| 7  | <b>795.399544</b>  | 398.203410        | 778.372995         | 389.690136        | 777.388979         | 389.198128        | <b>D</b> | <b>1311.665155</b> | 656.336215        | 1294.638606       | <b>647.822941</b> | 1293.654590        | <b>647.330933</b> | <b>12</b> |
| 8  | 866.436658         | 433.721967        | 849.410109         | 425.208693        | 848.426093         | <b>424.716685</b> | <b>A</b> | <b>1196.638212</b> | 598.822744        | 1179.611663       | 590.309470        | <b>1178.627647</b> | 589.817462        | <b>11</b> |
| 9  | <b>1003.495570</b> | <b>502.251423</b> | 986.469021         | 493.738149        | 985.485005         | 493.246141        | <b>H</b> | <b>1125.601098</b> | 563.304187        | 1108.574549       | 554.790913        | 1107.590533        | 554.298905        | <b>10</b> |
| 10 | <b>1090.527598</b> | 545.767437        | <b>1073.501049</b> | 537.254163        | <b>1072.517033</b> | 536.762155        | <b>S</b> | <b>988.542186</b>  | 494.774731        | 971.515637        | 486.261457        | 970.531621         | <b>485.769449</b> | <b>9</b>  |
| 11 | <b>1177.559626</b> | 589.283451        | 1160.533077        | 580.770177        | <b>1159.549061</b> | 580.278169        | <b>S</b> | <b>901.510158</b>  | 451.258717        | 884.483609        | 442.745443        | 883.499593         | 442.253435        | <b>8</b>  |
| 12 | <b>1276.628040</b> | 638.817658        | <b>1259.601491</b> | 630.304384        | <b>1258.617475</b> | 629.812376        | <b>V</b> | <b>814.478130</b>  | <b>407.742703</b> | 797.451581        | 399.229428        | 796.467565         | 398.737420        | <b>7</b>  |
| 13 | <b>1377.675719</b> | 689.341498        | <b>1360.649170</b> | <b>680.828223</b> | 1359.665154        | <b>680.336215</b> | <b>T</b> | <b>715.409716</b>  | 358.208496        | 698.383167        | 349.695221        | 697.399151         | 349.203213        | <b>6</b>  |
| 14 | <b>1490.759783</b> | 745.883530        | <b>1473.733234</b> | 737.370255        | <b>1472.749218</b> | 736.878247        | <b>I</b> | <b>614.362037</b>  | 307.684656        | 597.335488        | 299.171382        | 596.351472         | 298.679374        | <b>5</b>  |
| 15 | <b>1591.807462</b> | 796.407369        | <b>1574.780913</b> | <b>787.894095</b> | <b>1573.796897</b> | 787.402087        | <b>T</b> | <b>501.277973</b>  | 251.142624        | 484.251424        | 242.629350        | 483.267408         | 242.137342        | <b>4</b>  |
| 16 | 1688.860226        | 844.933751        | 1671.833677        | 836.420477        | 1670.849661        | 835.928469        | <b>P</b> | <b>400.230294</b>  | 200.618785        | <b>383.203745</b> | 192.105510        |                    |                   | <b>3</b>  |
| 17 | <b>1816.918804</b> | 908.963040        | 1799.892255        | 900.449766        | 1798.908239        | 899.957758        | <b>Q</b> | <b>303.177530</b>  | 152.092403        | 286.150981        | 143.579128        |                    |                   | <b>2</b>  |
| 18 |                    |                   |                    |                   |                    |                   | <b>R</b> | 175.118952         | 88.063114         | 158.092403        | 79.549839         |                    |                   | <b>1</b>  |

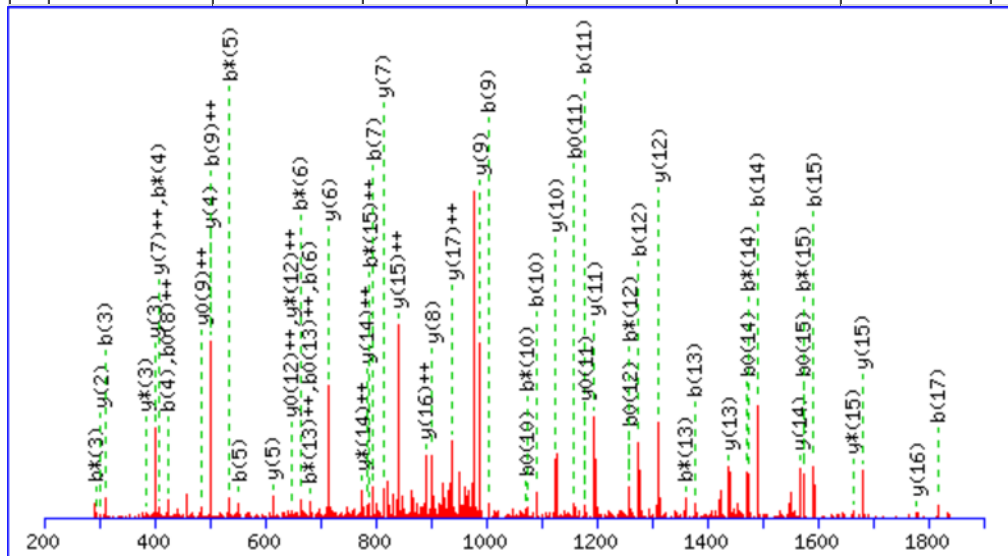

## Peptide View

MS/MS Fragmentation of **DFSLTSSSQTPGATK**

Found in **IP100291300**, Tax\_Id=9606 Gene\_Symbol=PODXL2 Putative uncharacterized protein PODXL2

Experiment: 08 - S\_C-2 Fraction: S\_C-2

Match to Query 9232: 1525.727448 from(763.871000,2+)

Title: OECHL100312\_05.10003.10003.2.dta

Data file \\BOROMIR\Masse\Data LTQ-Orbitrap\Chrystelle Lacroix\Etude clinique sJPU\OECHL100312\_05.raw

**Monoisotopic mass of neutral peptide Mr(calc):** 1525.726028**Fixed modifications:** Carbamidomethyl (C) (apply to specified residues or termini only)**Ions Score:** 58**Expect:** 0.00016**Matches :** 35/150 fragment ions using 73 most intense peaks ([help](#))

| #  | b                  | b <sup>++</sup> | b*                 | b <sup>+++</sup> | b <sup>0</sup>     | b <sup>0++</sup> | Seq. | y                  | y <sup>++</sup>   | y*                | y <sup>+++</sup>  | y <sup>0</sup>    | y <sup>0++</sup>  | #  |
|----|--------------------|-----------------|--------------------|------------------|--------------------|------------------|------|--------------------|-------------------|-------------------|-------------------|-------------------|-------------------|----|
| 1  | 116.034219         | 58.520748       |                    |                  | 98.023654          | 49.515465        | D    |                    |                   |                   |                   |                   |                   | 15 |
| 2  | <b>263.102633</b>  | 132.054954      |                    |                  | 245.092068         | 123.049672       | F    | 1411.706351        | 706.356813        | 1394.679802       | 697.843539        | 1393.695786       | 697.351531        | 14 |
| 3  | 350.134661         | 175.570968      |                    |                  | <b>332.124096</b>  | 166.565686       | S    | 1264.637937        | <b>632.822607</b> | 1247.611388       | 624.309332        | 1246.627372       | 623.817324        | 13 |
| 4  | 463.218725         | 232.113001      |                    |                  | <b>445.208160</b>  | 223.107718       | L    | <b>1177.605909</b> | 589.306592        | 1160.579360       | 580.793318        | 1159.595344       | 580.301310        | 12 |
| 5  | <b>564.266404</b>  | 282.636840      |                    |                  | <b>546.255839</b>  | 273.631558       | T    | <b>1064.521845</b> | 532.764561        | 1047.495296       | 524.251286        | 1046.511280       | 523.759278        | 11 |
| 6  | 651.298432         | 326.152854      |                    |                  | <b>633.287867</b>  | 317.147572       | S    | <b>963.474166</b>  | 482.240721        | 946.447617        | <b>473.727446</b> | 945.463601        | <b>473.235438</b> | 10 |
| 7  | 738.330460         | 369.668868      |                    |                  | 720.319895         | 360.663586       | S    | <b>876.442138</b>  | 438.724707        | 859.415589        | 430.211432        | <b>858.431573</b> | 429.719424        | 9  |
| 8  | <b>825.362488</b>  | 413.184882      |                    |                  | 807.351923         | 404.179599       | S    | <b>789.410110</b>  | 395.208693        | 772.383561        | 386.695418        | 771.399545        | 386.203410        | 8  |
| 9  | <b>953.421066</b>  | 477.214171      | 936.394517         | 468.700897       | <b>935.410501</b>  | 468.208889       | Q    | <b>702.378082</b>  | 351.692679        | 685.351533        | 343.179404        | 684.367517        | 342.687396        | 7  |
| 10 | <b>1054.468745</b> | 527.738010      | 1037.442196        | 519.224736       | <b>1036.458180</b> | 518.732728       | T    | <b>574.319504</b>  | 287.663390        | 557.292955        | 279.150115        | 556.308939        | 278.658107        | 6  |
| 11 | 1151.521509        | 576.264392      | 1134.494960        | 567.751118       | 1133.510944        | 567.259110       | P    | <b>473.271825</b>  | 237.139550        | 456.245276        | 228.626276        | <b>455.261260</b> | 228.134268        | 5  |
| 12 | <b>1208.542973</b> | 604.775124      | 1191.516424        | 596.261850       | 1190.532408        | 595.769842       | G    | <b>376.219061</b>  | 188.613168        | 359.192512        | 180.099894        | 358.208496        | 179.607886        | 4  |
| 13 | <b>1279.580087</b> | 640.293681      | <b>1262.553538</b> | 631.780407       | <b>1261.569522</b> | 631.288399       | A    | <b>319.197597</b>  | 160.102436        | <b>302.171048</b> | 151.589162        | 301.187032        | 151.097154        | 3  |
| 14 | <b>1380.627766</b> | 690.817521      | <b>1363.601217</b> | 682.304246       | <b>1362.617201</b> | 681.812238       | T    | <b>248.160483</b>  | 124.583879        | 231.133934        | 116.070605        | 230.149918        | 115.578597        | 2  |
| 15 |                    |                 |                    |                  |                    |                  | K    | 147.112804         | 74.060040         | 130.086255        | 65.546765         |                   |                   | 1  |

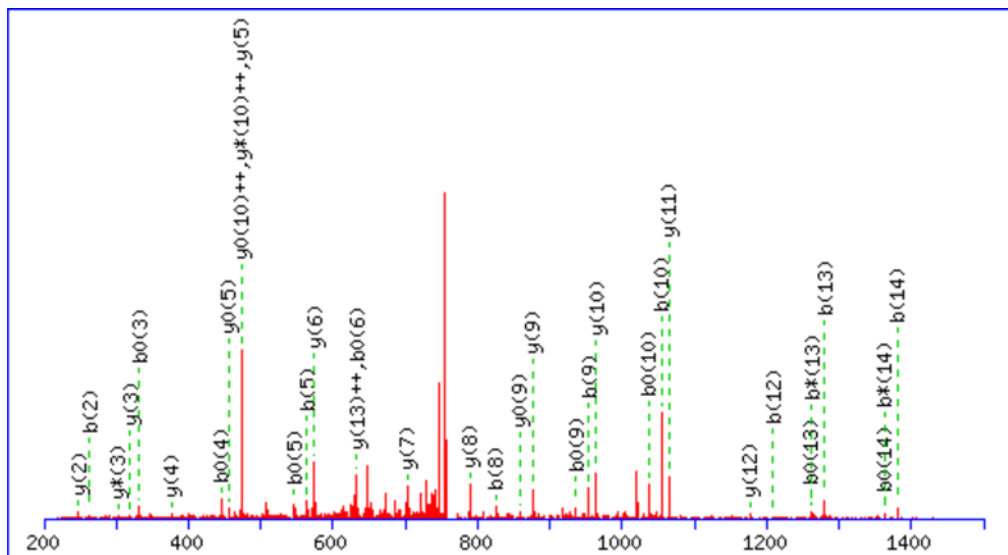

## Peptide View

MS/MS Fragmentation of **IESVLSSSGKR**

Found in **IPI00018236**, Tax\_Id=9606 Gene\_Symbol=GM2A Ganglioside GM2 activator

**Experiment:** 08 - S\_C-2 **Fraction:** S\_C-2

Match to Query 4941: 1161.635048 from(581.824800,2+)

Title: OECHL100312\_05.4843.4843.2.dta

Data file \\BOROMIR\Masse\Data LTQ-Orbitrap\Chrystelle Lacroix\Etude clinique sJPU\OECHL100312\_05.raw

**Monoisotopic mass of neutral peptide Mr(calc):** 1161.635330 **Fixed modifications:** Carbamidomethyl (C) (apply to specified residues or termini only) **Ions Score:** 65

**Expect:** 2.3e-005 **Matches :** 24/94 fragment ions using 40 most intense peaks ([help](#))

| # | b                 | b <sup>++</sup>   | b* | b* <sup>++</sup> | b <sup>0</sup>    | b <sup>0++</sup> | Seq. | y                  | y <sup>++</sup>   | y*                | y* <sup>++</sup> | y <sup>0</sup>    | y <sup>0++</sup> | #  |
|---|-------------------|-------------------|----|------------------|-------------------|------------------|------|--------------------|-------------------|-------------------|------------------|-------------------|------------------|----|
| 1 | 114.091340        | 57.549308         |    |                  |                   |                  | I    |                    |                   |                   |                  |                   |                  | 11 |
| 2 | <b>243.133933</b> | 122.070605        |    |                  | 225.123368        | 113.065322       | E    | <b>1049.558562</b> | <b>525.282919</b> | 1032.532013       | 516.769645       | 1031.547997       | 516.277637       | 10 |
| 3 | <b>330.165961</b> | 165.586618        |    |                  | <b>312.155396</b> | 156.581336       | S    | <b>920.515969</b>  | <b>460.761623</b> | <b>903.489420</b> | 452.248348       | <b>902.505404</b> | 451.756340       | 9  |
| 4 | <b>429.234375</b> | <b>215.120826</b> |    |                  | <b>411.223810</b> | 206.115543       | V    | <b>833.483941</b>  | 417.245609        | 816.457392        | 408.732334       | 815.473376        | 408.240326       | 8  |
| 5 | 542.318439        | 271.662858        |    |                  | 524.307874        | 262.657575       | L    | <b>734.415527</b>  | <b>367.711402</b> | 717.388978        | 359.198127       | 716.404962        | 358.706119       | 7  |
| 6 | 629.350467        | 315.178872        |    |                  | 611.339902        | 306.173589       | S    | <b>621.331463</b>  | 311.169370        | 604.304914        | 302.656095       | 603.320898        | 302.164087       | 6  |

|    |            |            |            |            |            |            |   |            |            |            |            |            |            |   |
|----|------------|------------|------------|------------|------------|------------|---|------------|------------|------------|------------|------------|------------|---|
| 7  | 716.382495 | 358.694886 |            |            | 698.371930 | 349.689603 | S | 534.299435 | 267.653356 | 517.272886 | 259.140081 | 516.288870 | 258.648073 | 5 |
| 8  | 803.414523 | 402.210899 |            |            | 785.403958 | 393.205617 | S | 447.267407 | 224.137342 | 430.240858 | 215.624067 | 429.256842 | 215.132059 | 4 |
| 9  | 860.435987 | 430.721632 |            |            | 842.425422 | 421.716349 | G | 360.235379 | 180.621328 | 343.208830 | 172.108053 |            |            | 3 |
| 10 | 988.530950 | 494.769113 | 971.504401 | 486.255838 | 970.520385 | 485.763830 | K | 303.213915 | 152.110596 | 286.187366 | 143.597321 |            |            | 2 |
| 11 |            |            |            |            |            |            | R | 175.118952 | 88.063114  | 158.092403 | 79.549840  |            |            | 1 |

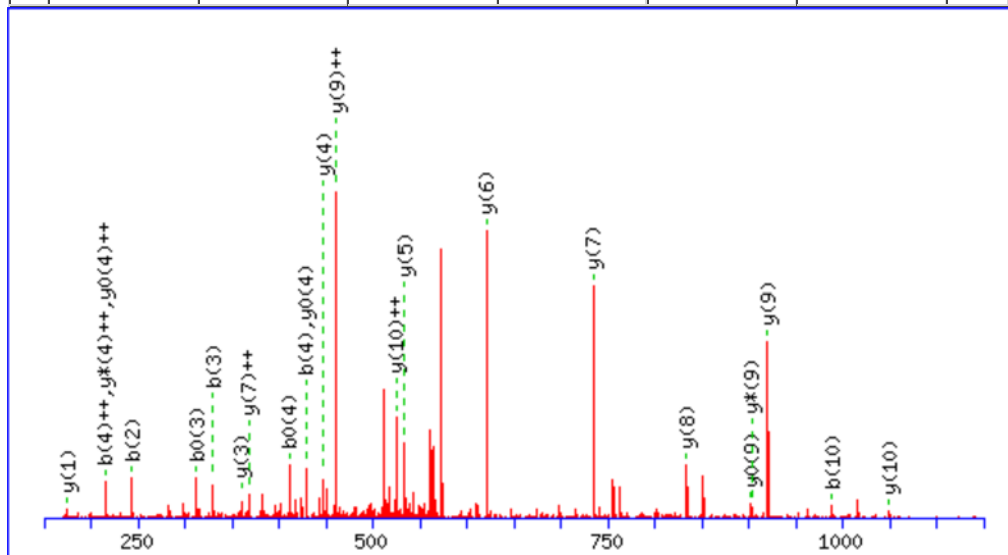

## Peptide View

MS/MS Fragmentation of **KAGPCEQAGSPCR**

Found in **IP100028381**, Tax\_Id=9606 Gene\_Symbol=DLK2 Isoform 1 of Protein delta homolog 2

Experiment: 08 - S\_C-2 Fraction: S\_C-2

Match to Query 8209: 1416.624048 from(709.319300,2+)

Title: OECHL100312\_05.1658.1658.2.dta

Data file \\BOROMIR\Masse\Data LTQ-Orbitrap\Chrystelle Lacroix\Etude clinique sJPU\OECHL100312\_05.raw

**Monoisotopic mass of neutral peptide Mr(calc):** 1416.623810 **Fixed modifications:** Carbamidomethyl (C) (apply to specified residues or termini only) **Ions Score:** 87

**Expect:** 1.1e-007 **Matches :** 22/128 fragment ions using 36 most intense peaks ([help](#))

| # | b          | b <sup>++</sup> | b <sup>*</sup> | b <sup>*++</sup> | b <sup>0</sup> | b <sup>0++</sup> | Seq. | y | y <sup>++</sup> | y <sup>*</sup> | y <sup>*++</sup> | y <sup>0</sup> | y <sup>0++</sup> | #  |
|---|------------|-----------------|----------------|------------------|----------------|------------------|------|---|-----------------|----------------|------------------|----------------|------------------|----|
| 1 | 129.102239 | 65.054757       | 112.075690     | 56.541483        |                |                  | K    |   |                 |                |                  |                |                  | 13 |

|    |                   |                   |             |            |                    |            |   |                    |                   |                    |                   |             |                   |    |
|----|-------------------|-------------------|-------------|------------|--------------------|------------|---|--------------------|-------------------|--------------------|-------------------|-------------|-------------------|----|
| 2  | 200.139353        | 100.573315        | 183.112804  | 92.060040  |                    |            | A | <b>1289.536133</b> | <b>645.271705</b> | 1272.509584        | 636.758430        | 1271.525568 | 636.266422        | 12 |
| 3  | <b>257.160817</b> | 129.084047        | 240.134268  | 120.570772 |                    |            | G | <b>1218.499019</b> | 609.753148        | 1201.472470        | 601.239873        | 1200.488454 | 600.747865        | 11 |
| 4  | 354.213581        | 177.610429        | 337.187032  | 169.097154 |                    |            | P | <b>1161.477555</b> | <b>581.242416</b> | 1144.451006        | 572.729141        | 1143.466990 | 572.237133        | 10 |
| 5  | 514.244230        | <b>257.625753</b> | 497.217681  | 249.112479 |                    |            | C | <b>1064.424791</b> | 532.716034        | <b>1047.398242</b> | 524.202759        | 1046.414226 | 523.710751        | 9  |
| 6  | 643.286823        | 322.147050        | 626.260274  | 313.633775 | 625.276258         | 313.141767 | E | <b>904.394142</b>  | 452.700709        | 887.367593         | 444.187434        | 886.383577  | 443.695427        | 8  |
| 7  | 771.345401        | 386.176339        | 754.318852  | 377.663064 | 753.334836         | 377.171056 | Q | <b>775.351549</b>  | 388.179413        | 758.325000         | 379.666138        | 757.340984  | 379.174130        | 7  |
| 8  | <b>842.382515</b> | 421.694896        | 825.355966  | 413.181621 | 824.371950         | 412.689613 | A | <b>647.292971</b>  | 324.150124        | 630.266422         | <b>315.636849</b> | 629.282406  | <b>315.144841</b> | 6  |
| 9  | 899.403979        | 450.205628        | 882.377430  | 441.692353 | 881.393414         | 441.200345 | G | <b>576.255857</b>  | 288.631567        | 559.229308         | 280.118292        | 558.245292  | 279.626284        | 5  |
| 10 | <b>986.436007</b> | 493.721642        | 969.409458  | 485.208367 | 968.425442         | 484.716359 | S | <b>519.234393</b>  | 260.120835        | 502.207844         | 251.607560        | 501.223828  | 251.115552        | 4  |
| 11 | 1083.488771       | 542.248024        | 1066.462222 | 533.734749 | <b>1065.478206</b> | 533.242741 | P | <b>432.202365</b>  | 216.604820        | <b>415.175816</b>  | 208.091546        |             |                   | 3  |
| 12 | 1243.519420       | 622.263348        | 1226.492871 | 613.750074 | 1225.508855        | 613.258066 | C | <b>335.149601</b>  | 168.078438        | 318.123052         | 159.565164        |             |                   | 2  |
| 13 |                   |                   |             |            |                    |            | R | 175.118952         | 88.063114         | 158.092403         | 79.549839         |             |                   | 1  |

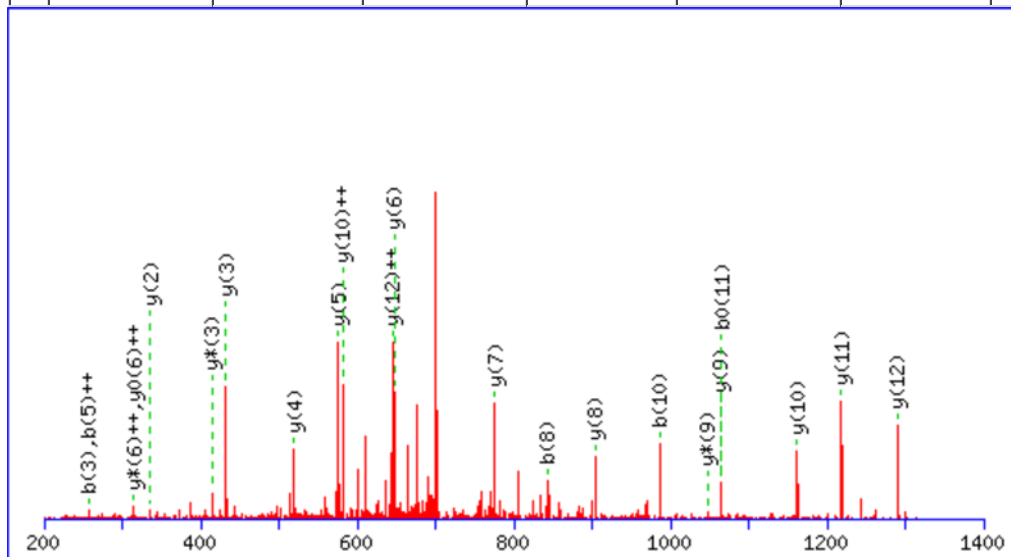

## Peptide View

MS/MS Fragmentation of **YDIALVQEV**R

Found in **IP100031065**, Tax\_Id=9606 Gene\_Symbol=DNASE1 Deoxyribonuclease-1

Experiment: 08 - S\_C-2 Fraction: S\_C-2

Match to Query 5583: 1204.645248 from(603.329900,2+)

Title: OECHL100312\_05.14199.14199.2.dta

Data file \\BOROMIR\Masse\Data LTQ-Orbitrap\Chrystelle Lacroix\Etude clinique sJPU\OECHL100312\_05.raw

**Monoisotopic mass of neutral peptide Mr(calc):** 1204.645172**Fixed modifications:** Carbamidomethyl (C) (apply to specified residues or termini only)**Ions Score:** 55**Expect:** 0.00024**Matches :** 9/90 fragment ions using 11 most intense peaks ([help](#))

| #  | b                  | b <sup>++</sup> | b*          | b <sup>+++</sup> | b <sup>0</sup> | b <sup>0++</sup> | Seq. | y                 | y <sup>++</sup>   | y*          | y <sup>+++</sup> | y <sup>0</sup> | y <sup>0++</sup> | #  |
|----|--------------------|-----------------|-------------|------------------|----------------|------------------|------|-------------------|-------------------|-------------|------------------|----------------|------------------|----|
| 1  | 164.070605         | 82.538940       |             |                  |                |                  | Y    |                   |                   |             |                  |                |                  | 10 |
| 2  | 279.097548         | 140.052412      |             |                  | 261.086983     | 131.047130       | D    | 1042.589136       | 521.798206        | 1025.562587 | 513.284932       | 1024.578571    | 512.792924       | 9  |
| 3  | 392.181612         | 196.594444      |             |                  | 374.171047     | 187.589162       | I    | <b>927.562193</b> | <b>464.284735</b> | 910.535644  | 455.771460       | 909.551628     | 455.279452       | 8  |
| 4  | 463.218726         | 232.113001      |             |                  | 445.208161     | 223.107719       | A    | <b>814.478129</b> | 407.742703        | 797.451580  | 399.229428       | 796.467564     | 398.737420       | 7  |
| 5  | 576.302790         | 288.655033      |             |                  | 558.292225     | 279.649751       | L    | <b>743.441015</b> | 372.224146        | 726.414466  | 363.710871       | 725.430450     | 363.218863       | 6  |
| 6  | 675.371204         | 338.189240      |             |                  | 657.360639     | 329.183958       | V    | <b>630.356951</b> | 315.682114        | 613.330402  | 307.168839       | 612.346386     | 306.676831       | 5  |
| 7  | 803.429782         | 402.218529      | 786.403233  | 393.705255       | 785.419217     | 393.213247       | Q    | <b>531.288537</b> | 266.147907        | 514.261988  | 257.634632       | 513.277972     | 257.142624       | 4  |
| 8  | 932.472375         | 466.739826      | 915.445826  | 458.226551       | 914.461810     | 457.734543       | E    | 403.229959        | 202.118618        | 386.203410  | 193.605343       | 385.219394     | 193.113335       | 3  |
| 9  | <b>1031.540789</b> | 516.274033      | 1014.514240 | 507.760758       | 1013.530224    | 507.268750       | V    | <b>274.187366</b> | 137.597321        | 257.160817  | 129.084047       |                |                  | 2  |
| 10 |                    |                 |             |                  |                |                  | R    | <b>175.118952</b> | 88.063114         | 158.092403  | 79.549839        |                |                  | 1  |

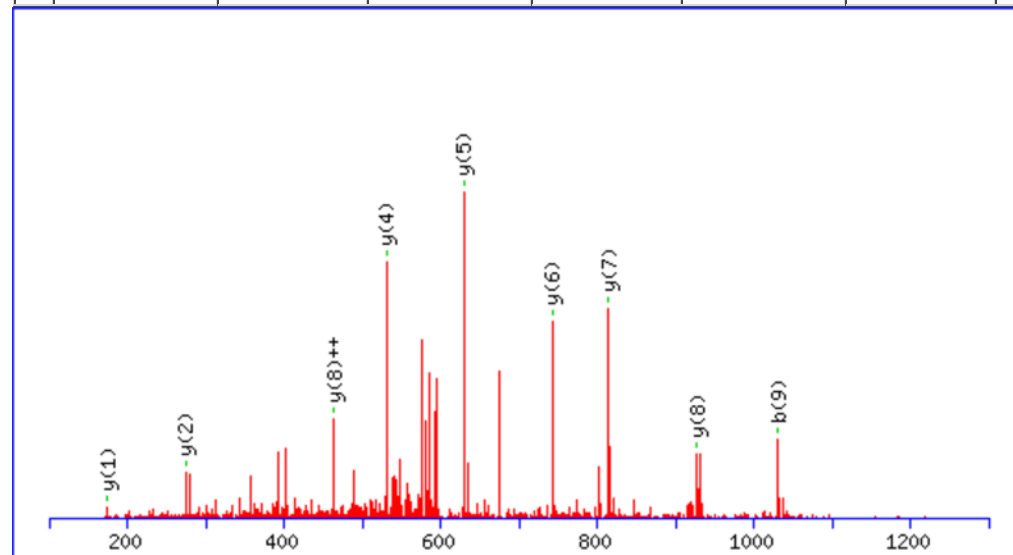

## Peptide View

MS/MS Fragmentation of **TVAGPVGGSLSVQCPYEKEHR**Found in **IPI00414784**, Tax\_Id=9606 Gene\_Symbol=CD300A Isoform 1 of CMRF35-like molecule 8

Experiment: 08 - S\_C-2 Fraction: S\_C-2

Match to Query 13200: 2270.113448 from(1136.064000,2+)

Title: OECHL100312\_05.9667.9667.2.dta

Data file \\BOROMIR\Masse\Data LTQ-Orbitrap\Chrystelle Lacroix\Etude clinique sJPU\OECHL100312\_05.raw

**Monoisotopic mass of neutral peptide Mr(calc):** 2270.11374**Fixed modifications:** Carbamidomethyl (C) (apply to specified residues or termini only)**Ions Score:** 87**Expect:** 4.1e-007**Matches :** 28/212 fragment ions using 51 most intense peaks ([help](#))

| #  | b           | b <sup>++</sup> | b <sup>*</sup> | b <sup>*++</sup> | b <sup>0</sup> | b <sup>0++</sup> | Seq. | y           | y <sup>++</sup> | y <sup>*</sup> | y <sup>*++</sup> | y <sup>0</sup> | y <sup>0++</sup> |
|----|-------------|-----------------|----------------|------------------|----------------|------------------|------|-------------|-----------------|----------------|------------------|----------------|------------------|
| 1  | 102.054955  | 51.531116       |                |                  | 84.044390      | 42.525833        | T    |             |                 |                |                  |                |                  |
| 2  | 201.123369  | 101.065322      |                |                  | 183.112804     | 92.060040        | V    | 2170.070965 | 1085.539120     | 2153.044416    | 1077.025846      | 2152.060400    | 1076.5338        |
| 3  | 272.160483  | 136.583879      |                |                  | 254.149918     | 127.578597       | A    | 2071.002551 | 1036.004913     | 2053.976002    | 1027.491639      | 2052.991986    | 1026.9996        |
| 4  | 329.181947  | 165.094611      |                |                  | 311.171382     | 156.089329       | G    | 1999.965437 | 1000.486357     | 1982.938888    | 991.973082       | 1981.954872    | 991.4810         |
| 5  | 426.234711  | 213.620994      |                |                  | 408.224146     | 204.615711       | P    | 1942.943973 | 971.975625      | 1925.917424    | 963.462350       | 1924.933408    | 962.9703         |
| 6  | 525.303125  | 263.155201      |                |                  | 507.292560     | 254.149918       | V    | 1845.891209 | 923.449243      | 1828.864660    | 914.935968       | 1827.880644    | 914.4439         |
| 7  | 582.324589  | 291.665933      |                |                  | 564.314024     | 282.660650       | G    | 1746.822795 | 873.915036      | 1729.796246    | 865.401761       | 1728.812230    | 864.9097         |
| 8  | 639.346053  | 320.176665      |                |                  | 621.335488     | 311.171382       | G    | 1689.801331 | 845.404304      | 1672.774782    | 836.891029       | 1671.790766    | 836.3990         |
| 9  | 726.378081  | 363.692679      |                |                  | 708.367516     | 354.687396       | S    | 1632.779867 | 816.893572      | 1615.753318    | 808.380297       | 1614.769302    | 807.8882         |
| 10 | 839.462145  | 420.234711      |                |                  | 821.451580     | 411.229428       | L    | 1545.747839 | 773.377558      | 1528.721290    | 764.864283       | 1527.737274    | 764.3722         |
| 11 | 926.494173  | 463.750725      |                |                  | 908.483608     | 454.745442       | S    | 1432.663775 | 716.835526      | 1415.637226    | 708.322251       | 1414.653210    | 707.8302         |
| 12 | 1025.562587 | 513.284932      |                |                  | 1007.552022    | 504.279649       | V    | 1345.631747 | 673.319512      | 1328.605198    | 664.806237       | 1327.621182    | 664.3142         |
| 13 | 1153.621165 | 577.314221      | 1136.594616    | 568.800946       | 1135.610600    | 568.308938       | Q    | 1246.563333 | 623.785305      | 1229.536784    | 615.272030       | 1228.552768    | 614.7800         |
| 14 | 1313.651814 | 657.329545      | 1296.625265    | 648.816271       | 1295.641249    | 648.324263       | C    | 1118.504755 | 559.756016      | 1101.478206    | 551.242741       | 1100.494190    | 550.7507         |
| 15 | 1410.704578 | 705.855927      | 1393.678029    | 697.342653       | 1392.694013    | 696.850645       | P    | 958.474106  | 479.740691      | 941.447557     | 471.227417       | 940.463541     | 470.7354         |
| 16 | 1573.767907 | 787.387592      | 1556.741358    | 778.874317       | 1555.757342    | 778.382309       | Y    | 861.421342  | 431.214309      | 844.394793     | 422.701035       | 843.410777     | 422.2090         |
| 17 | 1702.810500 | 851.908888      | 1685.783951    | 843.395614       | 1684.799935    | 842.903606       | E    | 698.358013  | 349.682645      | 681.331464     | 341.169370       | 680.347448     | 340.6773         |
| 18 | 1830.905463 | 915.956370      | 1813.878914    | 907.443095       | 1812.894898    | 906.951087       | K    | 569.315420  | 285.161348      | 552.288871     | 276.648074       | 551.304855     | 276.1560         |
| 19 | 1959.948056 | 980.477666      | 1942.921507    | 971.964392       | 1941.937491    | 971.472384       | E    | 441.220457  | 221.113867      | 424.193908     | 212.600592       | 423.209892     | 212.1085         |
| 20 | 2097.006968 | 1049.007122     | 2079.980419    | 1040.493847      | 2078.996403    | 1040.001840      | H    | 312.177864  | 156.592570      | 295.151315     | 148.079295       |                |                  |
| 21 |             |                 |                |                  |                |                  | R    | 175.118952  | 88.063114       | 158.092403     | 79.549839        |                |                  |



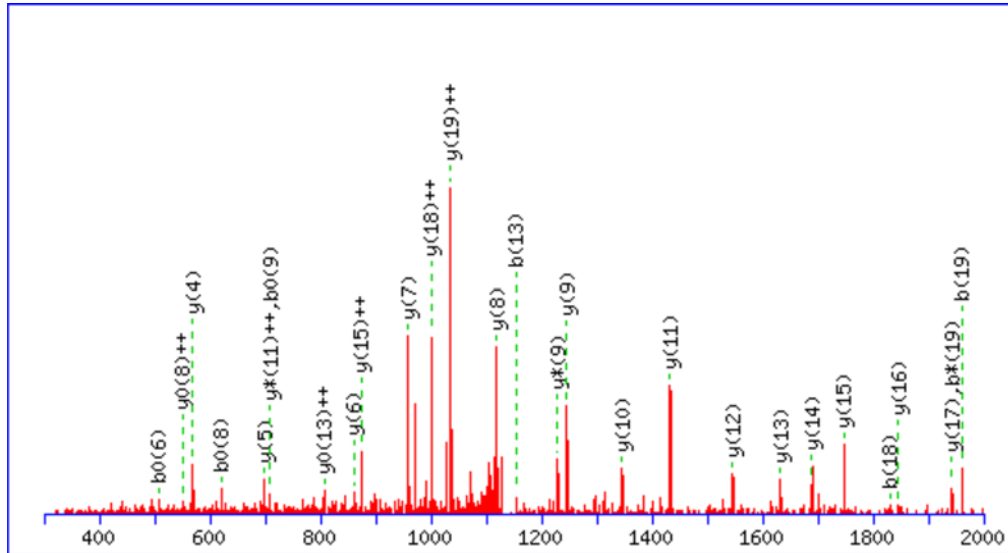

## Peptide View

MS/MS Fragmentation of **TDCPGDALFDLLR**

Found in **IPI00163207**, Tax\_Id=9606 Gene\_Symbol=PGLYRP2 Isoform 1 of N-acetylmuramoyl-L-alanine amidase

**Experiment:** 08 - S\_C-2 **Fraction:** S\_C-2

Match to Query 8901: 1491.701448 from(746.858000,2+)

Title: OECHL100312\_05.18109.18109.2.dta

Data file \\BOROMIR\Masse\Data LTQ-Orbitrap\Chrystelle Lacroix\Etude clinique sJPU\OECHL100312\_05.raw

**Monoisotopic mass of neutral peptide Mr(calc):** 1491.702789 **Fixed modifications:** Carbamidomethyl (C) (apply to specified residues or termini only) **Ions Score:** 68

**Expect:** 1.5e-005 **Matches :** 20/114 fragment ions using 37 most intense peaks ([help](#))

| # | b                 | b <sup>++</sup> | b <sup>0</sup> | b <sup>0++</sup> | Seq. | y                  | y <sup>++</sup>   | y*          | y <sup>*++</sup> | y <sup>0</sup> | y <sup>0++</sup> | #  |
|---|-------------------|-----------------|----------------|------------------|------|--------------------|-------------------|-------------|------------------|----------------|------------------|----|
| 1 | 102.054955        | 51.531116       | 84.044390      | 42.525833        | T    |                    |                   |             |                  |                |                  | 13 |
| 2 | 217.081898        | 109.044587      | 199.071333     | 100.039304       | D    | 1391.662378        | 696.334827        | 1374.635829 | 687.821552       | 1373.651813    | 687.329544       | 12 |
| 3 | <b>377.112547</b> | 189.059912      | 359.101982     | 180.054629       | C    | <b>1276.635435</b> | <b>638.821355</b> | 1259.608886 | 630.308081       | 1258.624870    | 629.816073       | 11 |
| 4 | 474.165311        | 237.586294      | 456.154746     | 228.581011       | P    | <b>1116.604786</b> | <b>558.806031</b> | 1099.578237 | 550.292756       | 1098.594221    | 549.800748       | 10 |
| 5 | 531.186775        | 266.097026      | 513.176210     | 257.091743       | G    | <b>1019.552022</b> | 510.279649        | 1002.525473 | 501.766374       | 1001.541457    | 501.274366       | 9  |
| 6 | 646.213718        | 323.610497      | 628.203153     | 314.605215       | D    | <b>962.530558</b>  | 481.768917        | 945.504009  | 473.255642       | 944.519993     | 472.763634       | 8  |

|    |             |            |             |            |   |            |            |            |            |            |            |   |
|----|-------------|------------|-------------|------------|---|------------|------------|------------|------------|------------|------------|---|
| 7  | 717.250832  | 359.129054 | 699.240267  | 350.123772 | A | 847.503615 | 424.255445 | 830.477066 | 415.742171 | 829.493050 | 415.250163 | 7 |
| 8  | 830.334896  | 415.671086 | 812.324331  | 406.665804 | L | 776.466501 | 388.736888 | 759.439952 | 380.223614 | 758.455936 | 379.731606 | 6 |
| 9  | 977.403310  | 489.205293 | 959.392745  | 480.200011 | F | 663.382437 | 332.194856 | 646.355888 | 323.681582 | 645.371872 | 323.189574 | 5 |
| 10 | 1092.430253 | 546.718765 | 1074.419688 | 537.713482 | D | 516.314023 | 258.660649 | 499.287474 | 250.147375 | 498.303458 | 249.655367 | 4 |
| 11 | 1205.514317 | 603.260796 | 1187.503752 | 594.255514 | L | 401.287080 | 201.147178 | 384.260531 | 192.633903 |            |            | 3 |
| 12 | 1318.598381 | 659.802828 | 1300.587816 | 650.797546 | L | 288.203016 | 144.605146 | 271.176467 | 136.091871 |            |            | 2 |
| 13 |             |            |             |            | R | 175.118952 | 88.063114  | 158.092403 | 79.549839  |            |            | 1 |

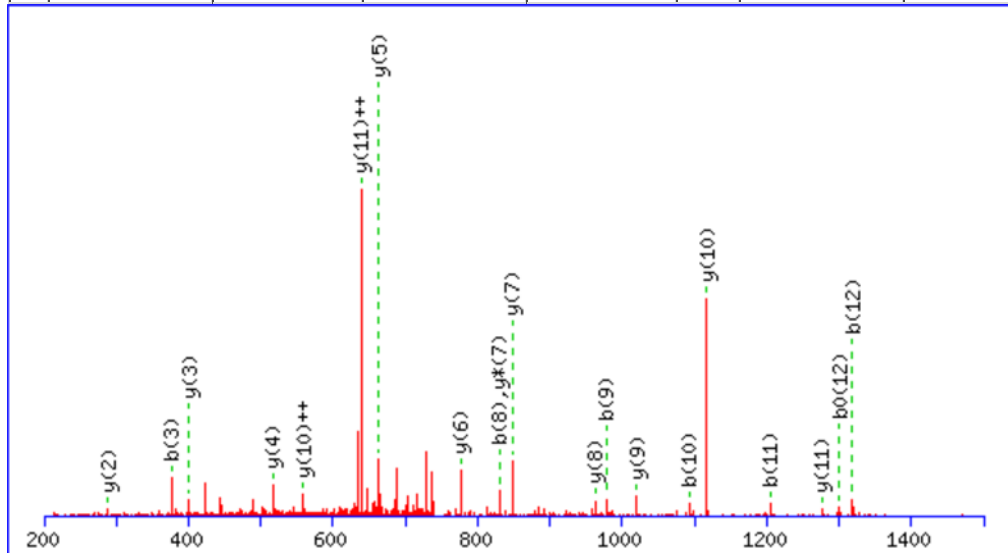

## Peptide View

MS/MS Fragmentation of **DISEMFLQIYK**

Found in **IPI00385161**, Tax\_Id=9606 Gene\_Symbol=MUC1 Mucin short variant SV10

Experiment: 08 - S\_C-2 Fraction: S\_C-2

Match to Query 7940: 1385.689648 from(693.852100,2+)

Title: OECHL100312\_05.17946.17946.2.dta

Data file \\BOROMIR\Masse\Data LTQ-Orbitrap\Chrystelle Lacroix\Etude clinique sJPU\OECHL100312\_05.raw

**Monoisotopic mass of neutral peptide Mr(calc):** 1385.690063 **Fixed modifications:** Carbamidomethyl (C) (apply to specified residues or termini only) **Ions Score:** 54

**Expect:** 0.00045 **Matches :** 14/92 fragment ions using 24 most intense peaks ([help](#))

| #  | b                  | b <sup>++</sup> | b*          | b <sup>*++</sup> | b <sup>0</sup>    | b <sup>0++</sup> | Seq.     | y                  | y <sup>++</sup> | y*          | y <sup>*++</sup> | y <sup>0</sup> | y <sup>0++</sup> | #         |
|----|--------------------|-----------------|-------------|------------------|-------------------|------------------|----------|--------------------|-----------------|-------------|------------------|----------------|------------------|-----------|
| 1  | 116.034219         | 58.520748       |             |                  | 98.023654         | 49.515465        | <b>D</b> |                    |                 |             |                  |                |                  | <b>11</b> |
| 2  | <b>229.118283</b>  | 115.062779      |             |                  | 211.107718        | 106.057497       | <b>I</b> | 1271.670423        | 636.338850      | 1254.643874 | 627.825575       | 1253.659858    | 627.333567       | <b>10</b> |
| 3  | 316.150311         | 158.578793      |             |                  | 298.139746        | 149.573511       | <b>S</b> | <b>1158.586359</b> | 579.796818      | 1141.559810 | 571.283543       | 1140.575794    | 570.791535       | <b>9</b>  |
| 4  | 445.192904         | 223.100090      |             |                  | 427.182339        | 214.094808       | <b>E</b> | <b>1071.554331</b> | 536.280804      | 1054.527782 | 527.767529       | 1053.543766    | 527.275521       | <b>8</b>  |
| 5  | 576.233389         | 288.620333      |             |                  | 558.222824        | 279.615050       | <b>M</b> | <b>942.511738</b>  | 471.759507      | 925.485189  | 463.246233       |                |                  | <b>7</b>  |
| 6  | <b>723.301803</b>  | 362.154540      |             |                  | <b>705.291238</b> | 353.149257       | <b>F</b> | <b>811.471253</b>  | 406.239265      | 794.444704  | 397.725990       |                |                  | <b>6</b>  |
| 7  | <b>836.385867</b>  | 418.696572      |             |                  | 818.375302        | 409.691289       | <b>L</b> | 664.402839         | 332.705058      | 647.376290  | 324.191783       |                |                  | <b>5</b>  |
| 8  | <b>964.444445</b>  | 482.725861      | 947.417896  | 474.212586       | 946.433880        | 473.720578       | <b>Q</b> | <b>551.318775</b>  | 276.163026      | 534.292226  | 267.649751       |                |                  | <b>4</b>  |
| 9  | <b>1077.528509</b> | 539.267893      | 1060.501960 | 530.754618       | 1059.517944       | 530.262610       | <b>I</b> | <b>423.260197</b>  | 212.133737      | 406.233648  | 203.620462       |                |                  | <b>3</b>  |
| 10 | <b>1240.591838</b> | 620.799557      | 1223.565289 | 612.286283       | 1222.581273       | 611.794275       | <b>Y</b> | <b>310.176133</b>  | 155.591705      | 293.149584  | 147.078430       |                |                  | <b>2</b>  |
| 11 |                    |                 |             |                  |                   |                  | <b>K</b> | 147.112804         | 74.060040       | 130.086255  | 65.546765        |                |                  | <b>1</b>  |

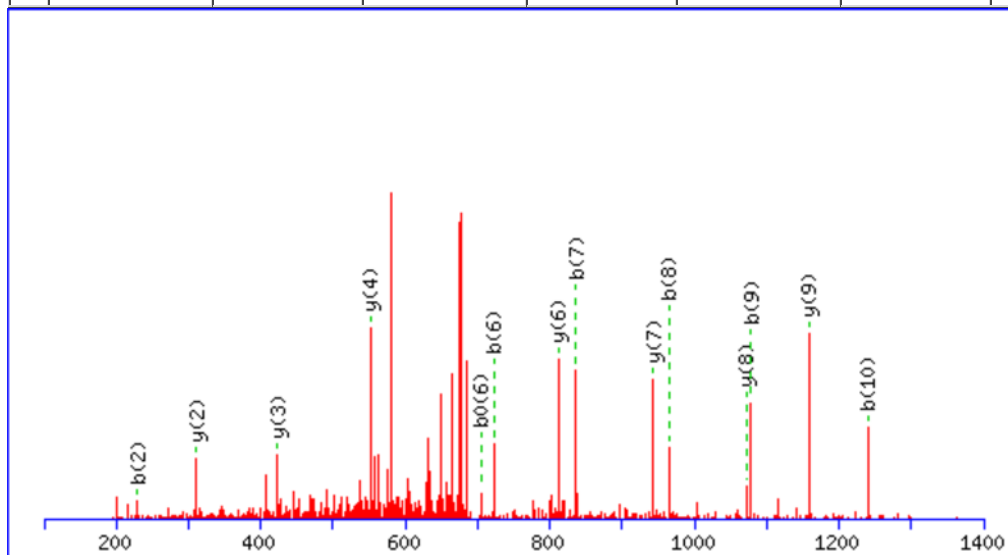

## Peptide View

MS/MS Fragmentation of **ATGDIKVTSEIK**

Found in **IP100302614**, Tax\_Id=9606 Gene\_Symbol=VTCN1 V-set domain containing T cell activation inhibitor 1

**Experiment: 08 - S\_C-2 Fraction: S\_C-2**

Match to Query 7980: 1389.735248 from(695.874900,2+)

Title: OECHL100312\_05.7177.7177.2.dta

Data file \\BOROMIR\Masse\Data LTQ-Orbitrap\Chrystelle Lacroix\Etude clinique sJPU\OECHL100312\_05.raw

**Monoisotopic mass of neutral peptide Mr(calc): 1389.735107**Fixed modifications: Carbamidomethyl (C) (apply to specified residues or termini only)**Ions Score: 56****Expect: 0.0003**Matches : 33/128 fragment ions using 48 most intense peaks ([help](#))

| #         | <b>b</b>           | <b>b<sup>++</sup></b> | <b>b*</b>          | <b>b<sup>*++</sup></b> | <b>b<sup>0</sup></b> | <b>b<sup>0++</sup></b> | Seq.     | <b>y</b>           | <b>y<sup>++</sup></b> | <b>y*</b>         | <b>y<sup>*++</sup></b> | <b>y<sup>0</sup></b> | <b>y<sup>0++</sup></b> | #         |
|-----------|--------------------|-----------------------|--------------------|------------------------|----------------------|------------------------|----------|--------------------|-----------------------|-------------------|------------------------|----------------------|------------------------|-----------|
| <b>1</b>  | 72.044390          | 36.525833             |                    |                        |                      |                        | <b>A</b> |                    |                       |                   |                        |                      |                        | <b>13</b> |
| <b>2</b>  | 173.092069         | 87.049672             |                    |                        | 155.081504           | 78.044390              | <b>T</b> | <b>1319.705288</b> | 660.356282            | 1302.678739       | 651.843008             | 1301.694723          | 651.350999             | <b>12</b> |
| <b>3</b>  | 230.113533         | 115.560404            |                    |                        | 212.102968           | 106.555122             | <b>G</b> | <b>1218.657609</b> | 609.832442            | 1201.631060       | 601.319168             | 1200.647044          | 600.827160             | <b>11</b> |
| <b>4</b>  | <b>345.140476</b>  | 173.073876            |                    |                        | <b>327.129911</b>    | 164.068593             | <b>D</b> | 1161.636145        | <b>581.321710</b>     | 1144.609596       | 572.808436             | 1143.625580          | 572.316428             | <b>10</b> |
| <b>5</b>  | <b>458.224540</b>  | 229.615908            |                    |                        | <b>440.213975</b>    | 220.610626             | <b>I</b> | <b>1046.609202</b> | <b>523.808239</b>     | 1029.582653       | 515.294964             | 1028.598637          | 514.802956             | <b>9</b>  |
| <b>6</b>  | 586.319503         | 293.663390            | 569.292954         | 285.150115             | 568.308938           | 284.658107             | <b>K</b> | <b>933.525138</b>  | 467.266207            | <b>916.498589</b> | 458.752932             | <b>915.514573</b>    | <b>458.260924</b>      | <b>8</b>  |
| <b>7</b>  | 685.387917         | 343.197597            | 668.361368         | 334.684322             | 667.377352           | 334.192314             | <b>V</b> | <b>805.430175</b>  | 403.218725            | 788.403626        | 394.705451             | <b>787.419610</b>    | 394.213443             | <b>7</b>  |
| <b>8</b>  | <b>786.435596</b>  | 393.721436            | 769.409047         | 385.208162             | 768.425031           | 384.716154             | <b>T</b> | <b>706.361761</b>  | 353.684518            | 689.335212        | <b>345.171244</b>      | 688.351196           | 344.679236             | <b>6</b>  |
| <b>9</b>  | <b>915.478189</b>  | <b>458.242733</b>     | 898.451640         | 449.729458             | <b>897.467624</b>    | 449.237450             | <b>E</b> | 605.314082         | 303.160679            | 588.287533        | 294.647404             | 587.303517           | 294.155396             | <b>5</b>  |
| <b>10</b> | <b>1002.510217</b> | 501.758747            | 985.483668         | 493.245472             | 984.499652           | 492.753464             | <b>S</b> | <b>476.271489</b>  | 238.639382            | 459.244940        | 230.126108             | <b>458.260924</b>    | 229.634100             | <b>4</b>  |
| <b>11</b> | <b>1131.552810</b> | <b>566.280043</b>     | <b>1114.526261</b> | <b>557.766769</b>      | <b>1113.542245</b>   | <b>557.274760</b>      | <b>E</b> | 389.239461         | 195.123368            | 372.212912        | 186.610094             | 371.228896           | 186.118086             | <b>3</b>  |
| <b>12</b> | <b>1244.636874</b> | 622.822075            | <b>1227.610325</b> | 614.308800             | 1226.626309          | 613.816792             | <b>I</b> | <b>260.196868</b>  | 130.602072            | 243.170319        | 122.088797             |                      |                        | <b>2</b>  |
| <b>13</b> |                    |                       |                    |                        |                      |                        | <b>K</b> | 147.112804         | 74.060040             | 130.086255        | 65.546765              |                      |                        | <b>1</b>  |

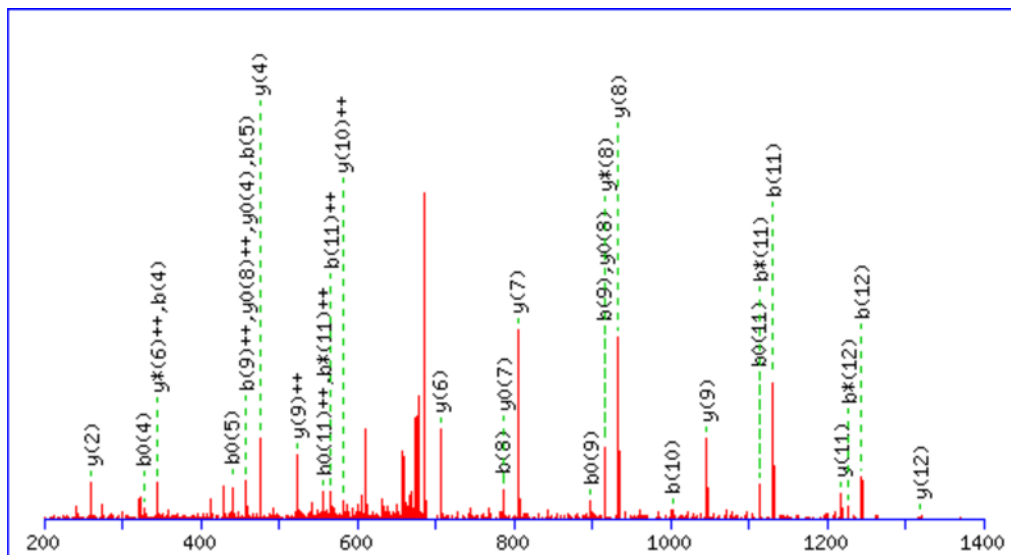

## Peptide View

MS/MS Fragmentation of **NPVLQQDAHSSVTITPQR**

Found in **IPI00410488**, Tax\_Id=9606 Gene\_Symbol=CD276 Isoform 1 of CD276 antigen

**Experiment:** 35 - OPB-2 **Fraction:** OPB-2

Match to Query 13354: 1990.027048 from(996.020800,2+)

Title: OECHL100312\_03.9929.9929.2.dta

Data file \\BOROMIR\Masse\Data LTQ-Orbitrap\Chrystelle Lacroix\Etude clinique sJPU\OECHL100312\_03.raw

**Monoisotopic mass of neutral peptide Mr(calc):** 1990.023209 **Fixed modifications:** Carbamidomethyl (C) (apply to specified residues or termini only) **Ions Score:** 86

**Expect:** 3.1e-007 **Matches :** 40/186 fragment ions using 65 most intense peaks ([help](#))

| # | b                 | b <sup>++</sup> | b*                | b* <sup>++</sup> | b <sup>0</sup> | b <sup>0++</sup> | Seq. | y                  | y <sup>++</sup>   | y*          | y* <sup>++</sup> | y <sup>0</sup> | y <sup>0++</sup> | #  |
|---|-------------------|-----------------|-------------------|------------------|----------------|------------------|------|--------------------|-------------------|-------------|------------------|----------------|------------------|----|
| 1 | 115.050203        | 58.028740       | 98.023654         | 49.515465        |                |                  | N    |                    |                   |             |                  |                |                  | 18 |
| 2 | 212.102967        | 106.555121      | 195.076418        | 98.041847        |                |                  | P    | 1876.987553        | 938.997415        | 1859.961004 | 930.484140       | 1858.976988    | 929.992132       | 17 |
| 3 | <b>311.171381</b> | 156.089328      | <b>294.144832</b> | 147.576054       |                |                  | V    | <b>1779.934789</b> | <b>890.471033</b> | 1762.908240 | 881.957758       | 1761.924224    | 881.465750       | 16 |
| 4 | <b>424.255445</b> | 212.631361      | 407.228896        | 204.118086       |                |                  | L    | <b>1680.866375</b> | <b>840.936826</b> | 1663.839826 | 832.423551       | 1662.855810    | 831.931543       | 15 |
| 5 | 552.314023        | 276.660650      | <b>535.287474</b> | 268.147375       |                |                  | Q    | <b>1567.782311</b> | 784.394794        | 1550.755762 | 775.881519       | 1549.771746    | 775.389511       | 14 |
| 6 | <b>680.372601</b> | 340.689939      | <b>663.346052</b> | 332.176664       |                |                  | Q    | <b>1439.723733</b> | 720.365505        | 1422.697184 | 711.852230       | 1421.713168    | 711.360222       | 13 |

|    |                    |                   |                    |                   |                    |                   |          |                    |            |             |            |             |                   |           |
|----|--------------------|-------------------|--------------------|-------------------|--------------------|-------------------|----------|--------------------|------------|-------------|------------|-------------|-------------------|-----------|
| 7  | 795.399544         | 398.203410        | 778.372995         | 389.690136        | 777.388979         | 389.198128        | <b>D</b> | <b>1311.665155</b> | 656.336215 | 1294.638606 | 647.822941 | 1293.654590 | 647.330933        | <b>12</b> |
| 8  | 866.436658         | 433.721967        | <b>849.410109</b>  | 425.208693        | 848.426093         | 424.716685        | <b>A</b> | <b>1196.638212</b> | 598.822744 | 1179.611663 | 590.309470 | 1178.627647 | 589.817462        | <b>11</b> |
| 9  | 1003.495570        | <b>502.251423</b> | <b>986.469021</b>  | 493.738149        | 985.485005         | 493.246141        | <b>H</b> | <b>1125.601098</b> | 563.304187 | 1108.574549 | 554.790913 | 1107.590533 | 554.298905        | <b>10</b> |
| 10 | <b>1090.527598</b> | 545.767437        | 1073.501049        | 537.254163        | 1072.517033        | 536.762155        | <b>S</b> | <b>988.542186</b>  | 494.774731 | 971.515637  | 486.261457 | 970.531621  | <b>485.769449</b> | <b>9</b>  |
| 11 | 1177.559626        | 589.283451        | 1160.533077        | 580.770177        | 1159.549061        | 580.278169        | <b>S</b> | <b>901.510158</b>  | 451.258717 | 884.483609  | 442.745443 | 883.499593  | 442.253435        | <b>8</b>  |
| 12 | <b>1276.628040</b> | 638.817658        | <b>1259.601491</b> | 630.304384        | <b>1258.617475</b> | 629.812376        | <b>V</b> | 814.478130         | 407.742703 | 797.451581  | 399.229428 | 796.467565  | 398.737420        | <b>7</b>  |
| 13 | <b>1377.675719</b> | 689.341498        | 1360.649170        | <b>680.828223</b> | 1359.665154        | <b>680.336215</b> | <b>T</b> | <b>715.409716</b>  | 358.208496 | 698.383167  | 349.695221 | 697.399151  | 349.203213        | <b>6</b>  |
| 14 | <b>1490.759783</b> | 745.883530        | <b>1473.733234</b> | 737.370255        | <b>1472.749218</b> | 736.878247        | <b>I</b> | <b>614.362037</b>  | 307.684656 | 597.335488  | 299.171382 | 596.351472  | 298.679374        | <b>5</b>  |
| 15 | <b>1591.807462</b> | 796.407369        | 1574.780913        | 787.894095        | <b>1573.796897</b> | 787.402087        | <b>T</b> | <b>501.277973</b>  | 251.142624 | 484.251424  | 242.629350 | 483.267408  | 242.137342        | <b>4</b>  |
| 16 | 1688.860226        | 844.933751        | 1671.833677        | 836.420477        | 1670.849661        | 835.928469        | <b>P</b> | <b>400.230294</b>  | 200.618785 | 383.203745  | 192.105510 |             |                   | <b>3</b>  |
| 17 | <b>1816.918804</b> | 908.963040        | <b>1799.892255</b> | 900.449766        | 1798.908239        | 899.957758        | <b>Q</b> | 303.177530         | 152.092403 | 286.150981  | 143.579128 |             |                   | <b>2</b>  |
| 18 |                    |                   |                    |                   |                    |                   | <b>R</b> | 175.118952         | 88.063114  | 158.092403  | 79.549839  |             |                   | <b>1</b>  |

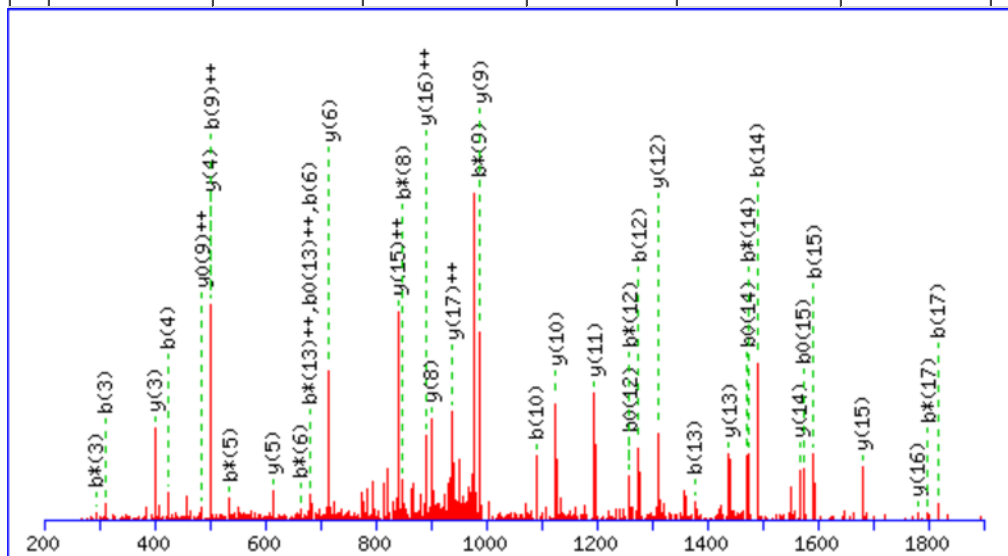

## Peptide View

MS/MS Fragmentation of **AHGQESAI FNEVAPGYFSR**

Found in **IP100170635**, Tax\_Id=9606 Gene\_Symbol=SECTM1 Secreted and transmembrane protein 1

Experiment: 35 - OPB-2 Fraction: OPB-2

Match to Query 13928: 2078.983448 from(1040.499000,2+)

Title: OECHL100312\_03.17266.17266.2.dta

Data file \\BOROMIR\Masse\Data LTQ-Orbitrap\Chrystelle Lacroix\Etude clinique sJPU\OECHL100312\_03.raw

**Monoisotopic mass of neutral peptide Mr(calc):** 2078.980988**Fixed modifications:** Carbamidomethyl (C) (apply to specified residues or termini only)**Ions Score:** 70**Expect:** 1.5e-005**Matches :** 35/200 fragment ions using 80 most intense peaks ([help](#))

| #  | b                  | b <sup>++</sup>   | b*                 | b <sup>*++</sup>  | b <sup>0</sup>    | b <sup>0++</sup>  | Seq. | y                  | y <sup>++</sup> | y*                 | y <sup>*++</sup>  | y <sup>0</sup>    | y <sup>0++</sup>  | #  |
|----|--------------------|-------------------|--------------------|-------------------|-------------------|-------------------|------|--------------------|-----------------|--------------------|-------------------|-------------------|-------------------|----|
| 1  | 72.044390          | 36.525833         |                    |                   |                   |                   | A    |                    |                 |                    |                   |                   |                   | 19 |
| 2  | 209.103302         | 105.055289        |                    |                   |                   |                   | H    | 2008.951166        | 1004.979221     | 1991.924617        | 996.465947        | 1990.940601       | 995.973939        | 18 |
| 3  | 266.124766         | 133.566021        |                    |                   |                   |                   | G    | <b>1871.892254</b> | 936.449765      | 1854.865705        | 927.936491        | 1853.881689       | 927.444483        | 17 |
| 4  | 394.183344         | 197.595310        | 377.156795         | 189.082035        |                   |                   | Q    | 1814.870790        | 907.939033      | 1797.844241        | 899.425759        | 1796.860225       | 898.933751        | 16 |
| 5  | <b>523.225937</b>  | 262.116607        | 506.199388         | 253.603332        | 505.215372        | 253.111324        | E    | <b>1686.812212</b> | 843.909744      | 1669.785663        | 835.396470        | 1668.801647       | 834.904462        | 15 |
| 6  | <b>610.257965</b>  | 305.632621        | 593.231416         | 297.119346        | <b>592.247400</b> | 296.627338        | S    | <b>1557.769619</b> | 779.388448      | <b>1540.743070</b> | 770.875173        | 1539.759054       | 770.383165        | 14 |
| 7  | <b>681.295079</b>  | 341.151178        | 664.268530         | 332.637903        | <b>663.284514</b> | 332.145895        | A    | <b>1470.737591</b> | 735.872434      | 1453.711042        | <b>727.359159</b> | 1452.727026       | <b>726.867151</b> | 13 |
| 8  | <b>794.379143</b>  | 397.693210        | 777.352594         | 389.179935        | 776.368578        | 388.687927        | I    | <b>1399.700477</b> | 700.353877      | 1382.673928        | 691.840602        | 1381.689912       | 691.348594        | 12 |
| 9  | <b>941.447557</b>  | 471.227417        | 924.421008         | 462.714142        | 923.436992        | 462.222134        | F    | <b>1286.616413</b> | 643.811845      | 1269.589864        | 635.298570        | 1268.605848       | 634.806562        | 11 |
| 10 | 1055.490484        | 528.248880        | 1038.463935        | 519.735606        | 1037.479919       | 519.243597        | N    | <b>1139.547999</b> | 570.277638      | 1122.521450        | 561.764363        | 1121.537434       | 561.272355        | 10 |
| 11 | <b>1184.533077</b> | 592.770176        | 1167.506528        | 584.256902        | 1166.522512       | 583.764894        | E    | <b>1025.505072</b> | 513.256174      | 1008.478523        | 504.742900        | 1007.494507       | 504.250892        | 9  |
| 12 | <b>1283.601491</b> | 642.304383        | 1266.574942        | 633.791109        | 1265.590926       | 633.299101        | V    | <b>896.462479</b>  | 448.734878      | 879.435930         | 440.221603        | 878.451914        | 439.729595        | 8  |
| 13 | <b>1354.638605</b> | 677.822940        | <b>1337.612056</b> | 669.309666        | 1336.628040       | 668.817658        | A    | <b>797.394065</b>  | 399.200671      | 780.367516         | 390.687396        | 779.383500        | 390.195388        | 7  |
| 14 | 1451.691369        | <b>726.349322</b> | 1434.664820        | 717.836048        | 1433.680804       | 717.344040        | P    | <b>726.356951</b>  | 363.682114      | 709.330402         | 355.168839        | 708.346386        | 354.676831        | 6  |
| 15 | <b>1508.712833</b> | 754.860054        | 1491.686284        | 746.346780        | 1490.702268       | 745.854772        | G    | <b>629.304187</b>  | 315.155732      | 612.277638         | 306.642457        | 611.293622        | 306.150449        | 5  |
| 16 | <b>1671.776162</b> | 836.391719        | 1654.749613        | 827.878445        | 1653.765597       | 827.386436        | Y    | 572.282723         | 286.645000      | 555.256174         | 278.131725        | 554.272158        | 277.639717        | 4  |
| 17 | <b>1818.844576</b> | 909.925926        | 1801.818027        | <b>901.412652</b> | 1800.834011       | <b>900.920643</b> | F    | <b>409.219394</b>  | 205.113335      | 392.192845         | 196.600061        | <b>391.208829</b> | 196.108053        | 3  |
| 18 | <b>1905.876604</b> | 953.441940        | 1888.850055        | 944.928666        | 1887.866039       | 944.436658        | S    | 262.150980         | 131.579128      | 245.124431         | 123.065854        | 244.140415        | 122.573846        | 2  |
| 19 |                    |                   |                    |                   |                   |                   | R    | 175.118952         | 88.063114       | 158.092403         | 79.549840         |                   |                   | 1  |

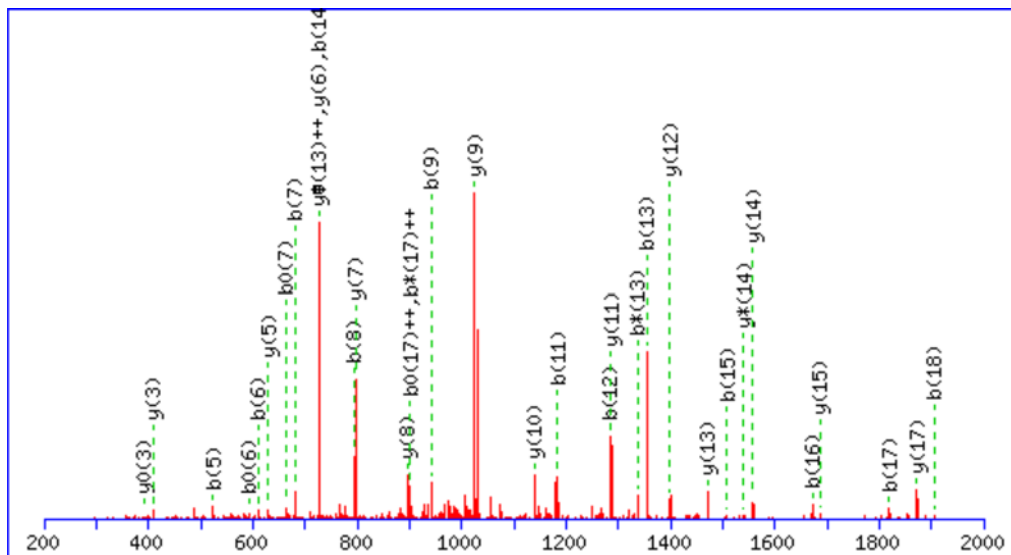

## Peptide View

MS/MS Fragmentation of **TGAVYVAEIGAK**

Found in **IPI00552937**, Tax\_Id=9606 Gene\_Symbol=NHLRC3 NHL repeat-containing protein 3

**Experiment:** 35 - OPB-2 **Fraction:** OPB-2

Match to Query 5046: 1177.636048 from(589.825300,2+)

Title: OECHL100312\_03.11508.11508.2.dta

Data file \\BOROMIR\Masse\Data LTQ-Orbitrap\Chrystelle Lacroix\Etude clinique sJPU\OECHL100312\_03.raw

**Monoisotopic mass of neutral peptide Mr(calc):** 1177.634277 **Fixed modifications:** Carbamidomethyl (C) (apply to specified residues or termini only) **Ions Score:** 73

**Expect:** 3.6e-006 **Matches :** 9/102 fragment ions using 10 most intense peaks ([help](#))

| # | b                 | b <sup>++</sup> | b <sup>0</sup> | b <sup>0++</sup> | Seq. | y                  | y <sup>++</sup> | y*          | y <sup>*++</sup> | y <sup>0</sup> | y <sup>0++</sup> | #  |
|---|-------------------|-----------------|----------------|------------------|------|--------------------|-----------------|-------------|------------------|----------------|------------------|----|
| 1 | 102.054955        | 51.531116       | 84.044390      | 42.525833        | T    |                    |                 |             |                  |                |                  | 12 |
| 2 | 159.076419        | 80.041847       | 141.065854     | 71.036565        | G    | <b>1077.593888</b> | 539.300582      | 1060.567339 | 530.787308       | 1059.583323    | 530.295300       | 11 |
| 3 | <b>230.113533</b> | 115.560404      | 212.102968     | 106.555122       | A    | <b>1020.572424</b> | 510.789850      | 1003.545875 | 502.276576       | 1002.561859    | 501.784568       | 10 |
| 4 | <b>329.181947</b> | 165.094611      | 311.171382     | 156.089329       | V    | <b>949.535310</b>  | 475.271293      | 932.508761  | 466.758019       | 931.524745     | 466.266011       | 9  |
| 5 | 492.245276        | 246.626276      | 474.234711     | 237.620994       | Y    | <b>850.466896</b>  | 425.737086      | 833.440347  | 417.223812       | 832.456331     | 416.731804       | 8  |
| 6 | 591.313690        | 296.160483      | 573.303125     | 287.155201       | V    | <b>687.403567</b>  | 344.205422      | 670.377018  | 335.692147       | 669.393002     | 335.200139       | 7  |



|    |             |            |             |            |   |            |            |            |            |            |            |   |
|----|-------------|------------|-------------|------------|---|------------|------------|------------|------------|------------|------------|---|
| 7  | 662.350804  | 331.679040 | 644.340239  | 322.673758 | A | 588.335153 | 294.671215 | 571.308604 | 286.157940 | 570.324588 | 285.665932 | 6 |
| 8  | 791.393397  | 396.200337 | 773.382832  | 387.195054 | E | 517.298039 | 259.152658 | 500.271490 | 250.639383 | 499.287474 | 250.147375 | 5 |
| 9  | 904.477461  | 452.742369 | 886.466896  | 443.737086 | I | 388.255446 | 194.631361 | 371.228897 | 186.118087 |            |            | 4 |
| 10 | 961.498925  | 481.253101 | 943.488360  | 472.247818 | G | 275.171382 | 138.089329 | 258.144833 | 129.576055 |            |            | 3 |
| 11 | 1032.536039 | 516.771658 | 1014.525474 | 507.766375 | A | 218.149918 | 109.578597 | 201.123369 | 101.065322 |            |            | 2 |
| 12 |             |            |             |            | K | 147.112804 | 74.060040  | 130.086255 | 65.546765  |            |            | 1 |

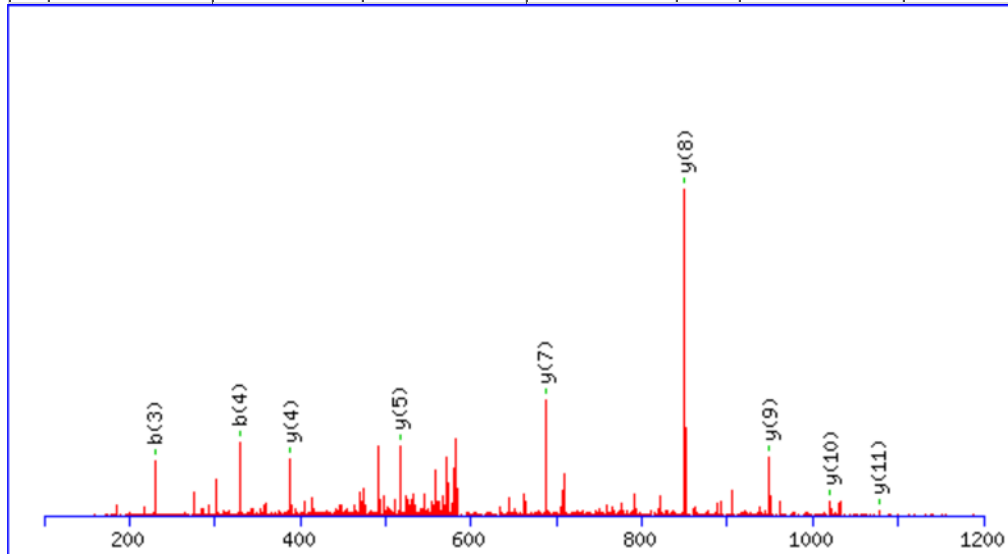

## Peptide View

MS/MS Fragmentation of **HSFKGEECPAGSHR**

Found in **IPI00021970**, Tax\_Id=9606 Gene\_Symbol=MGC31957;TNFRSF10C TNFRSF10C protein

Experiment: 35 - OPB-2 Fraction: OPB-2

Match to Query 9882: 1597.706248 from(799.860400,2+)

Title: OECHL100312\_03.2259.2259.2.dta

Data file \\BOROMIR\Masse\Data LTQ-Orbitrap\Chrystelle Lacroix\Etude clinique sJPU\OECHL100312\_03.raw

**Monoisotopic mass of neutral peptide Mr(calc): 1597.705566** Fixed modifications: Carbamidomethyl (C) (apply to specified residues or termini only) **Ions Score: 54**

**Expect: 0.00024** Matches : 22/144 fragment ions using 42 most intense peaks ([help](#))

| # | b | b <sup>++</sup> | b <sup>*</sup> | b <sup>*++</sup> | b <sup>0</sup> | b <sup>0++</sup> | Seq. | y | y <sup>++</sup> | y <sup>*</sup> | y <sup>*++</sup> | y <sup>0</sup> | y <sup>0++</sup> | # |
|---|---|-----------------|----------------|------------------|----------------|------------------|------|---|-----------------|----------------|------------------|----------------|------------------|---|
|---|---|-----------------|----------------|------------------|----------------|------------------|------|---|-----------------|----------------|------------------|----------------|------------------|---|

|    |                    |            |                    |            |                   |            |   |                    |                   |             |            |             |            |  |    |
|----|--------------------|------------|--------------------|------------|-------------------|------------|---|--------------------|-------------------|-------------|------------|-------------|------------|--|----|
| 1  | 138.066188         | 69.536732  |                    |            |                   |            | H |                    |                   |             |            |             |            |  | 14 |
| 2  | <b>225.098216</b>  | 113.052746 |                    |            | 207.087651        | 104.047463 | S | <b>1461.653938</b> | <b>731.330607</b> | 1444.627389 | 722.817333 | 1443.643373 | 722.325325 |  | 13 |
| 3  | <b>372.166630</b>  | 186.586953 |                    |            | <b>354.156065</b> | 177.581671 | F | <b>1374.621910</b> | <b>687.814593</b> | 1357.595361 | 679.301319 | 1356.611345 | 678.809311 |  | 12 |
| 4  | <b>500.261593</b>  | 250.634435 | 483.235044         | 242.121160 | <b>482.251028</b> | 241.629152 | K | <b>1227.553496</b> | <b>614.280386</b> | 1210.526947 | 605.767112 | 1209.542931 | 605.275104 |  | 11 |
| 5  | <b>557.283057</b>  | 279.145167 | 540.256508         | 270.631892 | 539.272492        | 270.139884 | G | <b>1099.458533</b> | 550.232905        | 1082.431984 | 541.719630 | 1081.447968 | 541.227622 |  | 10 |
| 6  | <b>686.325650</b>  | 343.666463 | 669.299101         | 335.153189 | 668.315085        | 334.661181 | E | 1042.437069        | 521.722173        | 1025.410520 | 513.208898 | 1024.426504 | 512.716890 |  | 9  |
| 7  | 815.368243         | 408.187760 | 798.341694         | 399.674485 | 797.357678        | 399.182477 | E | <b>913.394476</b>  | 457.200876        | 896.367927  | 448.687602 | 895.383911  | 448.195594 |  | 8  |
| 8  | <b>975.398892</b>  | 488.203084 | 958.372343         | 479.689810 | 957.388327        | 479.197802 | C | 784.351883         | 392.679580        | 767.325334  | 384.166305 | 766.341318  | 383.674297 |  | 7  |
| 9  | 1072.451656        | 536.729466 | 1055.425107        | 528.216192 | 1054.441091       | 527.724184 | P | <b>624.321234</b>  | 312.664255        | 607.294685  | 304.150981 | 606.310669  | 303.658973 |  | 6  |
| 10 | <b>1143.488770</b> | 572.248023 | <b>1126.462221</b> | 563.734749 | 1125.478205       | 563.242741 | A | 527.268470         | 264.137873        | 510.241921  | 255.624598 | 509.257905  | 255.132590 |  | 5  |
| 11 | 1200.510234        | 600.758755 | 1183.483685        | 592.245481 | 1182.499669       | 591.753473 | G | <b>456.231356</b>  | 228.619316        | 439.204807  | 220.106041 | 438.220791  | 219.614033 |  | 4  |
| 12 | <b>1287.542262</b> | 644.274769 | 1270.515713        | 635.761495 | 1269.531697       | 635.269487 | S | 399.209892         | 200.108584        | 382.183343  | 191.595309 | 381.199327  | 191.103301 |  | 3  |
| 13 | <b>1424.601174</b> | 712.804225 | 1407.574625        | 704.290951 | 1406.590609       | 703.798943 | H | 312.177864         | 156.592570        | 295.151315  | 148.079295 |             |            |  | 2  |
| 14 |                    |            |                    |            |                   |            | R | 175.118952         | 88.063114         | 158.092403  | 79.549839  |             |            |  | 1  |

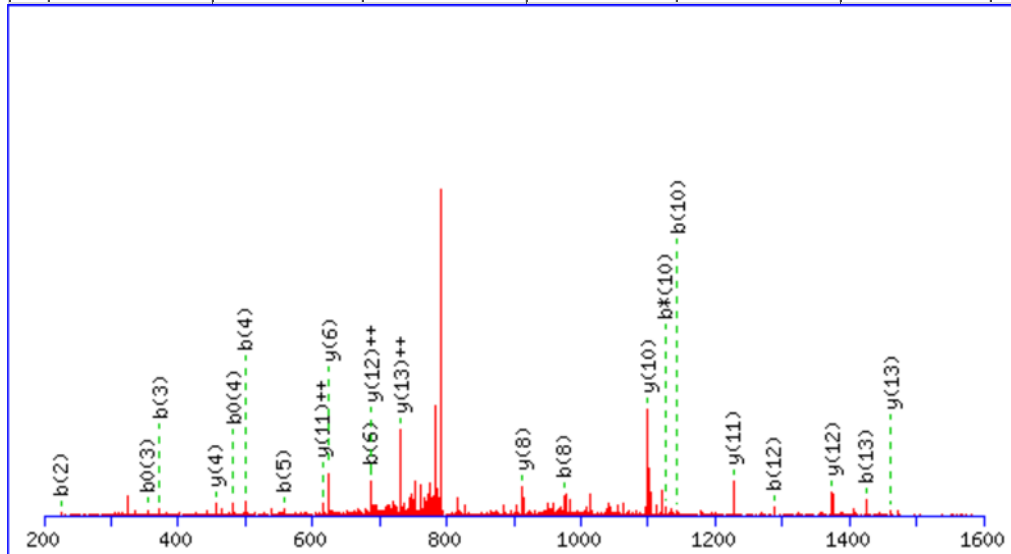

## Peptide View

MS/MS Fragmentation of **LWCATTSNFDSKK**Found in **IPI00027509**, Tax\_Id=9606 Gene\_Symbol=MMP9 Matrix metalloproteinase-9**Experiment:** 35 - OPB-2 **Fraction:** OPB-2

Match to Query 10686: 1671.757448 from(836.886000,2+)

Title: OECHL100312\_03.10825.10825.2.dta

Data file \\BOROMIR\Masse\Data LTQ-Orbitrap\Chrystelle Lacroix\Etude clinique sJPU\OECHL100312\_03.raw

**Monoisotopic mass of neutral peptide Mr(calc):** 1671.756271 **Fixed modifications:** Carbamidomethyl (C) (apply to specified residues or termini only) **Ions Score:** 58**Expect:** 0.00011 **Matches :** 23/130 fragment ions using 42 most intense peaks ([help](#))

| #  | b                  | b <sup>++</sup> | b*          | b <sup>*++</sup> | b <sup>0</sup> | b <sup>0++</sup> | Seq. | y                  | y <sup>++</sup>   | y*                | y <sup>*++</sup>  | y <sup>0</sup>     | y <sup>0++</sup>  | #  |
|----|--------------------|-----------------|-------------|------------------|----------------|------------------|------|--------------------|-------------------|-------------------|-------------------|--------------------|-------------------|----|
| 1  | 114.091340         | 57.549308       |             |                  |                |                  | L    |                    |                   |                   |                   |                    |                   | 14 |
| 2  | <b>300.170653</b>  | 150.588965      |             |                  |                |                  | W    | 1559.679484        | <b>780.343380</b> | 1542.652935       | <b>771.830106</b> | 1541.668919        | 771.338098        | 13 |
| 3  | <b>460.201302</b>  | 230.604289      |             |                  |                |                  | C    | <b>1373.600171</b> | <b>687.303724</b> | 1356.573622       | <b>678.790449</b> | 1355.589606        | <b>678.298441</b> | 12 |
| 4  | 531.238416         | 266.122846      |             |                  |                |                  | A    | <b>1213.569522</b> | 607.288399        | 1196.542973       | 598.775125        | 1195.558957        | 598.283117        | 11 |
| 5  | 632.286095         | 316.646686      |             |                  | 614.275530     | 307.641403       | T    | <b>1142.532408</b> | 571.769842        | 1125.505859       | 563.256568        | <b>1124.521843</b> | 562.764560        | 10 |
| 6  | 733.333774         | 367.170525      |             |                  | 715.323209     | 358.165243       | T    | <b>1041.484729</b> | 521.246003        | 1024.458180       | 512.732728        | 1023.474164        | 512.240720        | 9  |
| 7  | 820.365802         | 410.686539      |             |                  | 802.355237     | 401.681257       | S    | <b>940.437050</b>  | 470.722163        | 923.410501        | 462.208889        | <b>922.426485</b>  | 461.716881        | 8  |
| 8  | 934.408729         | 467.708003      | 917.382180  | 459.194728       | 916.398164     | 458.702720       | N    | <b>853.405022</b>  | 427.206149        | 836.378473        | 418.692875        | 835.394457         | 418.200867        | 7  |
| 9  | 1081.477143        | 541.242210      | 1064.450594 | 532.728935       | 1063.466578    | 532.236927       | F    | 739.362095         | 370.184686        | 722.335546        | 361.671411        | 721.351530         | 361.179403        | 6  |
| 10 | 1196.504086        | 598.755681      | 1179.477537 | 590.242407       | 1178.493521    | 589.750399       | D    | <b>592.293681</b>  | 296.650479        | 575.267132        | 288.137204        | <b>574.283116</b>  | 287.645196        | 5  |
| 11 | 1283.536114        | 642.271695      | 1266.509565 | 633.758421       | 1265.525549    | 633.266413       | S    | <b>477.266738</b>  | 239.137007        | <b>460.240189</b> | 230.623733        | 459.256173         | 230.131725        | 4  |
| 12 | <b>1398.563057</b> | 699.785167      | 1381.536508 | 691.271892       | 1380.552492    | 690.779884       | D    | <b>390.234710</b>  | 195.620993        | 373.208161        | 187.107719        | 372.224145         | 186.615711        | 3  |
| 13 | <b>1526.658020</b> | 763.832648      | 1509.631471 | 755.319374       | 1508.647455    | 754.827366       | K    | <b>275.207767</b>  | 138.107521        | 258.181218        | 129.594247        |                    |                   | 2  |
| 14 |                    |                 |             |                  |                |                  | K    | 147.112804         | 74.060040         | 130.086255        | 65.546765         |                    |                   | 1  |

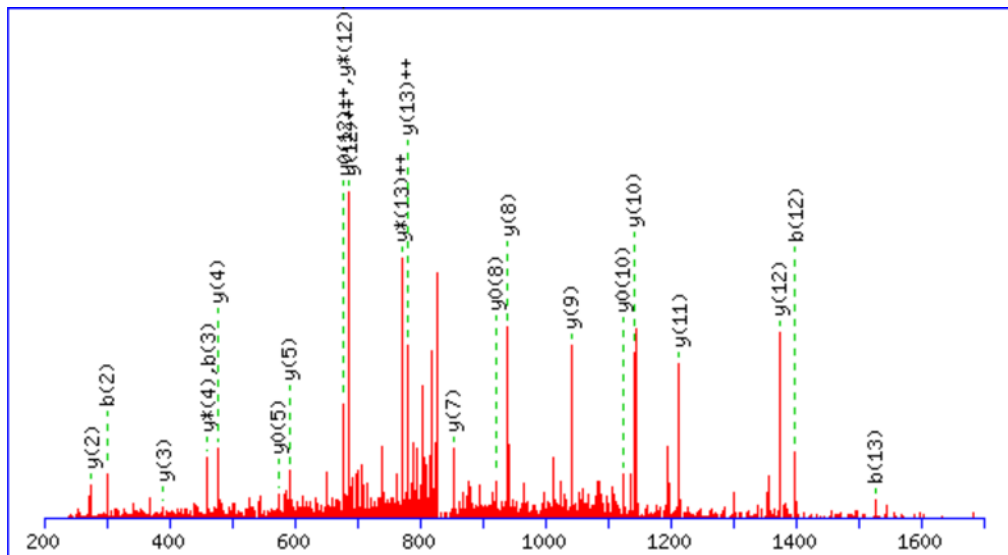

## Peptide View

MS/MS Fragmentation of **AADHDVGSELPPEGVLGALLR**

Found in **IPI00002280**, Tax\_Id=9606 Gene\_Symbol=PCSK1N ProSAAS

**Experiment:** 35 - OPB-2 **Fraction:** OPB-2

Match to Query 14156: 2115.095448 from(1058.555000,2+)

Title: OECHL100312\_03.20256.20256.2.dta

Data file \\BOROMIR\Masse\Data LTQ-Orbitrap\Chrystelle Lacroix\Etude clinique sJPU\OECHL100312\_03.raw

**Monoisotopic mass of neutral peptide Mr(calc):** 2115.096024 **Fixed modifications:** Carbamidomethyl (C) (apply to specified residues or termini only) **Ions Score:** 77

**Expect:** 2.8e-006 **Matches :** 38/180 fragment ions using 68 most intense peaks ([help](#))

| # | b                 | b <sup>++</sup> | b <sup>0</sup>    | b <sup>0++</sup> | Seq. | y                  | y <sup>++</sup>   | y <sup>*</sup> | y <sup>*++</sup> | y <sup>0</sup> | y <sup>0++</sup> | #  |
|---|-------------------|-----------------|-------------------|------------------|------|--------------------|-------------------|----------------|------------------|----------------|------------------|----|
| 1 | 72.044390         | 36.525833       |                   |                  | A    |                    |                   |                |                  |                |                  | 21 |
| 2 | 143.081504        | 72.044390       |                   |                  | A    | 2045.066196        | 1023.036736       | 2028.039647    | 1014.523461      | 2027.055631    | 1014.031453      | 20 |
| 3 | 258.108447        | 129.557862      | 240.097882        | 120.552579       | D    | 1974.029082        | 987.518179        | 1957.002533    | 979.004904       | 1956.018517    | 978.512896       | 19 |
| 4 | <b>395.167359</b> | 198.087317      | 377.156794        | 189.082035       | H    | 1859.002139        | <b>930.004707</b> | 1841.975590    | 921.491433       | 1840.991574    | 920.999425       | 18 |
| 5 | <b>510.194302</b> | 255.600789      | 492.183737        | 246.595507       | D    | <b>1721.943227</b> | 861.475251        | 1704.916678    | 852.961977       | 1703.932662    | 852.469969       | 17 |
| 6 | <b>609.262716</b> | 305.134996      | <b>591.252151</b> | 296.129714       | V    | <b>1606.916284</b> | 803.961780        | 1589.889735    | 795.448505       | 1588.905719    | 794.956497       | 16 |

|    |                    |                   |                    |                   |   |                    |                   |                    |                   |             |                   |           |
|----|--------------------|-------------------|--------------------|-------------------|---|--------------------|-------------------|--------------------|-------------------|-------------|-------------------|-----------|
| 7  | <b>666.284180</b>  | 333.645728        | 648.273615         | 324.640446        | G | <b>1507.847870</b> | 754.427573        | 1490.821321        | 745.914298        | 1489.837305 | 745.422290        | <b>15</b> |
| 8  | <b>753.316208</b>  | 377.161742        | <b>735.305643</b>  | <b>368.156460</b> | S | <b>1450.826406</b> | 725.916841        | 1433.799857        | 717.403566        | 1432.815841 | 716.911558        | <b>14</b> |
| 9  | <b>882.358801</b>  | 441.683039        | <b>864.348236</b>  | 432.677756        | E | <b>1363.794378</b> | 682.400827        | 1346.767829        | 673.887552        | 1345.783813 | 673.395544        | <b>13</b> |
| 10 | <b>995.442865</b>  | 498.225071        | <b>977.432300</b>  | 489.219788        | L | <b>1234.751785</b> | 617.879530        | 1217.725236        | <b>609.366256</b> | 1216.741220 | <b>608.874248</b> | <b>12</b> |
| 11 | 1092.495629        | 546.751453        | 1074.485064        | 537.746170        | P | <b>1121.667721</b> | <b>561.337498</b> | <b>1104.641172</b> | 552.824224        | 1103.657156 | 552.332216        | <b>11</b> |
| 12 | 1189.548393        | 595.277835        | 1171.537828        | 586.272552        | P | <b>1024.614957</b> | 512.811116        | 1007.588408        | 504.297842        | 1006.604392 | 503.805834        | <b>10</b> |
| 13 | <b>1318.590986</b> | 659.799131        | 1300.580421        | 650.793848        | E | 927.562193         | 464.284734        | 910.535644         | 455.771460        | 909.551628  | 455.279452        | <b>9</b>  |
| 14 | 1375.612450        | 688.309863        | 1357.601885        | 679.304580        | G | <b>798.519600</b>  | 399.763438        | 781.493051         | 391.250163        |             |                   | <b>8</b>  |
| 15 | <b>1474.680864</b> | <b>737.844070</b> | 1456.670299        | 728.838787        | V | 741.498136         | 371.252706        | 724.471587         | 362.739431        |             |                   | <b>7</b>  |
| 16 | <b>1587.764928</b> | 794.386102        | 1569.754363        | 785.380819        | L | <b>642.429722</b>  | 321.718499        | 625.403173         | 313.205224        |             |                   | <b>6</b>  |
| 17 | <b>1644.786392</b> | 822.896834        | 1626.775827        | 813.891551        | G | <b>529.345658</b>  | 265.176467        | 512.319109         | 256.663192        |             |                   | <b>5</b>  |
| 18 | 1715.823506        | 858.415391        | 1697.812941        | 849.410108        | A | <b>472.324194</b>  | 236.665735        | 455.297645         | 228.152460        |             |                   | <b>4</b>  |
| 19 | <b>1828.907570</b> | 914.957423        | <b>1810.897005</b> | 905.952140        | L | <b>401.287080</b>  | 201.147178        | 384.260531         | 192.633903        |             |                   | <b>3</b>  |
| 20 | <b>1941.991634</b> | 971.499455        | 1923.981069        | 962.494172        | L | 288.203016         | 144.605146        | 271.176467         | 136.091872        |             |                   | <b>2</b>  |
| 21 |                    |                   |                    |                   | R | 175.118952         | 88.063114         | 158.092403         | 79.549840         |             |                   | <b>1</b>  |

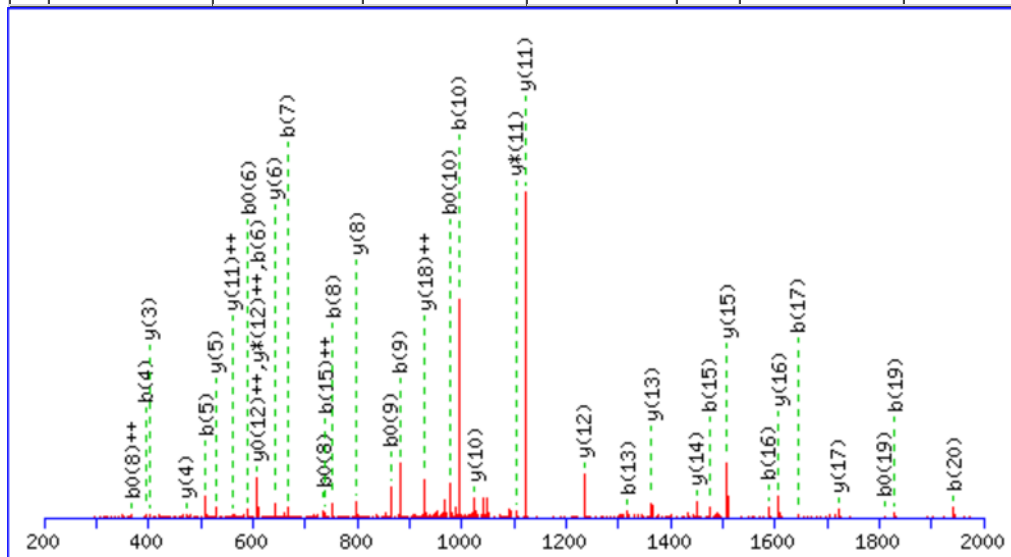

## Peptide View

MS/MS Fragmentation of **EIVLTQSPATLSLSPGER**Found in **IPI00816799**, Tax\_Id=9606 Gene\_Symbol=- Rheumatoid factor D5 light chain (Fragment)**Experiment:** 35 - OPB-2 **Fraction:** OPB-2

Match to Query 12650: 1897.017848 from(949.516200,2+)

Title: OECHL100312\_03.16697.16697.2.dta

Data file \\BOROMIR\Masse\Data LTQ-Orbitrap\Chrystelle Lacroix\Etude clinique sJPU\OECHL100312\_03.raw

**Monoisotopic mass of neutral peptide Mr(calc):** 1897.015640**Fixed modifications:** Carbamidomethyl (C) (apply to specified residues or termini only)**Ions Score:** 82**Expect:** 6.3e-007**Matches :** 42/192 fragment ions using 81 most intense peaks ([help](#))

| #  | b                  | b <sup>++</sup>   | b <sup>*</sup> | b <sup>*++</sup>  | b <sup>0</sup>     | b <sup>0++</sup>  | Seq.     | y                  | y <sup>++</sup>   | y <sup>*</sup>     | y <sup>*++</sup>  | y <sup>0</sup>     | y <sup>0++</sup>  | #         |
|----|--------------------|-------------------|----------------|-------------------|--------------------|-------------------|----------|--------------------|-------------------|--------------------|-------------------|--------------------|-------------------|-----------|
| 1  | 130.049869         | 65.528572         |                |                   | 112.039304         | 56.523290         | <b>E</b> |                    |                   |                    |                   |                    |                   | <b>18</b> |
| 2  | 243.133933         | 122.070605        |                |                   | 225.123368         | 113.065322        | <b>I</b> | 1768.980341        | 884.993808        | 1751.953792        | 876.480534        | 1750.969776        | 875.988526        | <b>17</b> |
| 3  | <b>342.202347</b>  | 171.604812        |                |                   | 324.191782         | 162.599529        | <b>V</b> | <b>1655.896277</b> | 828.451776        | 1638.869728        | <b>819.938502</b> | 1637.885712        | <b>819.446494</b> | <b>16</b> |
| 4  | <b>455.286411</b>  | 228.146844        |                |                   | 437.275846         | 219.141561        | <b>L</b> | <b>1556.827863</b> | <b>778.917569</b> | 1539.801314        | 770.404295        | 1538.817298        | 769.912287        | <b>15</b> |
| 5  | <b>556.334090</b>  | 278.670683        |                |                   | <b>538.323525</b>  | 269.665401        | <b>T</b> | <b>1443.743799</b> | 722.375537        | 1426.717250        | 713.862263        | 1425.733234        | 713.370255        | <b>14</b> |
| 6  | 684.392668         | <b>342.699972</b> | 667.366119     | 334.186698        | <b>666.382103</b>  | 333.694690        | <b>Q</b> | <b>1342.696120</b> | 671.851698        | 1325.669571        | 663.338423        | 1324.685555        | 662.846415        | <b>13</b> |
| 7  | <b>771.424696</b>  | 386.215986        | 754.398147     | 377.702712        | <b>753.414131</b>  | 377.210704        | <b>S</b> | <b>1214.637542</b> | 607.822409        | <b>1197.610993</b> | 599.309134        | <b>1196.626977</b> | 598.817126        | <b>12</b> |
| 8  | 868.477460         | 434.742368        | 851.450911     | 426.229094        | 850.466895         | 425.737086        | <b>P</b> | <b>1127.605514</b> | 564.306395        | 1110.578965        | <b>555.793120</b> | 1109.594949        | 555.301112        | <b>11</b> |
| 9  | 939.514574         | 470.260925        | 922.488025     | 461.747651        | 921.504009         | 461.255643        | <b>A</b> | <b>1030.552750</b> | 515.780013        | 1013.526201        | 507.266738        | 1012.542185        | 506.774730        | <b>10</b> |
| 10 | <b>1040.562253</b> | 520.784765        | 1023.535704    | 512.271490        | <b>1022.551688</b> | 511.779482        | <b>T</b> | <b>959.515636</b>  | 480.261456        | 942.489087         | 471.748181        | 941.505071         | 471.256173        | <b>9</b>  |
| 11 | <b>1153.646317</b> | 577.326797        | 1136.619768    | 568.813522        | <b>1135.635752</b> | 568.321514        | <b>L</b> | <b>858.467957</b>  | 429.737616        | 841.441408         | 421.224342        | 840.457392         | 420.732334        | <b>8</b>  |
| 12 | 1240.678345        | 620.842811        | 1223.651796    | 612.329536        | 1222.667780        | 611.837528        | <b>S</b> | <b>745.383893</b>  | 373.195585        | 728.357344         | 364.682310        | 727.373328         | 364.190302        | <b>7</b>  |
| 13 | <b>1353.762409</b> | 677.384842        | 1336.735860    | 668.871568        | <b>1335.751844</b> | 668.379560        | <b>L</b> | <b>658.351865</b>  | 329.679570        | 641.325316         | 321.166296        | 640.341300         | 320.674288        | <b>6</b>  |
| 14 | <b>1440.794437</b> | 720.900857        | 1423.767888    | 712.387582        | <b>1422.783872</b> | 711.895574        | <b>S</b> | <b>545.267801</b>  | 273.137539        | 528.241252         | 264.624264        | 527.257236         | 264.132256        | <b>5</b>  |
| 15 | 1537.847201        | 769.427239        | 1520.820652    | <b>760.913964</b> | 1519.836636        | <b>760.421956</b> | <b>P</b> | <b>458.235773</b>  | 229.621524        | 441.209224         | 221.108250        | 440.225208         | 220.616242        | <b>4</b>  |
| 16 | <b>1594.868665</b> | 797.937971        | 1577.842116    | 789.424696        | 1576.858100        | 788.932688        | <b>G</b> | <b>361.183009</b>  | 181.095142        | 344.156460         | 172.581868        | <b>343.172444</b>  | 172.089860        | <b>3</b>  |
| 17 | <b>1723.911258</b> | 862.459267        | 1706.884709    | 853.945992        | <b>1705.900693</b> | 853.453984        | <b>E</b> | 304.161545         | 152.584410        | 287.134996         | 144.071136        | 286.150980         | 143.579128        | <b>2</b>  |
| 18 |                    |                   |                |                   |                    |                   | <b>R</b> | 175.118952         | 88.063114         | 158.092403         | 79.549839         |                    |                   | <b>1</b>  |

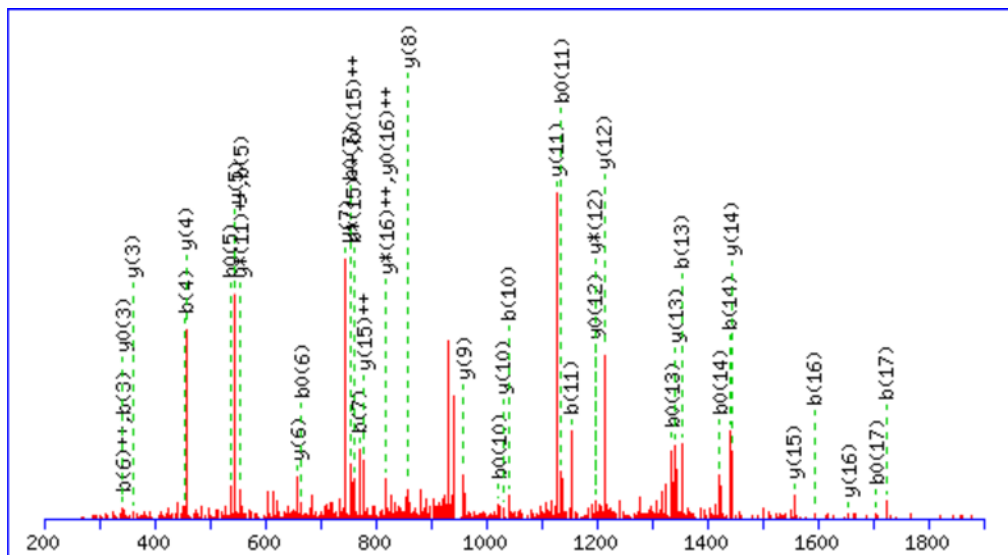

## Peptide View

MS/MS Fragmentation of **DFSLTSSSQTPGATK**

Found in **IPI00291300**, Tax\_Id=9606 Gene\_Symbol=PODXL2 Putative uncharacterized protein PODXL2

**Experiment:** 35 - OPB-2 **Fraction:** OPB-2

Match to Query 9188: 1525.727448 from(763.871000,2+)

Title: OECHL100312\_03.11010.11010.2.dta

Data file \\BOROMIR\Masse\Data LTQ-Orbitrap\Chrystelle Lacroix\Etude clinique sJPU\OECHL100312\_03.raw

**Monoisotopic mass of neutral peptide Mr(calc):** 1525.726028 **Fixed modifications:** Carbamidomethyl (C) (apply to specified residues or termini only) **Ions Score:** 57

**Expect:** 0.00022 **Matches :** 17/150 fragment ions using 26 most intense peaks ([help](#))

| # | b                 | b <sup>++</sup> | b <sup>*</sup> | b <sup>*++</sup> | b <sup>0</sup>    | b <sup>0++</sup> | Seq.     | y                  | y <sup>++</sup> | y <sup>*</sup> | y <sup>*++</sup>  | y <sup>0</sup> | y <sup>0++</sup>  | #         |
|---|-------------------|-----------------|----------------|------------------|-------------------|------------------|----------|--------------------|-----------------|----------------|-------------------|----------------|-------------------|-----------|
| 1 | 116.034219        | 58.520748       |                |                  | 98.023654         | 49.515465        | <b>D</b> |                    |                 |                |                   |                |                   | <b>15</b> |
| 2 | <b>263.102633</b> | 132.054954      |                |                  | 245.092068        | 123.049672       | <b>F</b> | 1411.706351        | 706.356813      | 1394.679802    | 697.843539        | 1393.695786    | 697.351531        | <b>14</b> |
| 3 | 350.134661        | 175.570968      |                |                  | <b>332.124096</b> | 166.565686       | <b>S</b> | 1264.637937        | 632.822607      | 1247.611388    | 624.309332        | 1246.627372    | 623.817324        | <b>13</b> |
| 4 | 463.218725        | 232.113001      |                |                  | 445.208160        | 223.107718       | <b>L</b> | 1177.605909        | 589.306592      | 1160.579360    | 580.793318        | 1159.595344    | 580.301310        | <b>12</b> |
| 5 | <b>564.266404</b> | 282.636840      |                |                  | 546.255839        | 273.631558       | <b>T</b> | <b>1064.521845</b> | 532.764561      | 1047.495296    | 524.251286        | 1046.511280    | 523.759278        | <b>11</b> |
| 6 | 651.298432        | 326.152854      |                |                  | 633.287867        | 317.147572       | <b>S</b> | <b>963.474166</b>  | 482.240721      | 946.447617     | <b>473.727446</b> | 945.463601     | <b>473.235438</b> | <b>10</b> |

|    |             |            |             |            |             |            |   |            |            |            |            |            |            |   |
|----|-------------|------------|-------------|------------|-------------|------------|---|------------|------------|------------|------------|------------|------------|---|
| 7  | 738.330460  | 369.668868 |             |            | 720.319895  | 360.663586 | S | 876.442138 | 438.724707 | 859.415589 | 430.211432 | 858.431573 | 429.719424 | 9 |
| 8  | 825.362488  | 413.184882 |             |            | 807.351923  | 404.179599 | S | 789.410110 | 395.208693 | 772.383561 | 386.695418 | 771.399545 | 386.203410 | 8 |
| 9  | 953.421066  | 477.214171 | 936.394517  | 468.700897 | 935.410501  | 468.208889 | Q | 702.378082 | 351.692679 | 685.351533 | 343.179404 | 684.367517 | 342.687396 | 7 |
| 10 | 1054.468745 | 527.738010 | 1037.442196 | 519.224736 | 1036.458180 | 518.732728 | T | 574.319504 | 287.663390 | 557.292955 | 279.150115 | 556.308939 | 278.658107 | 6 |
| 11 | 1151.521509 | 576.264392 | 1134.494960 | 567.751118 | 1133.510944 | 567.259110 | P | 473.271825 | 237.139550 | 456.245276 | 228.626276 | 455.261260 | 228.134268 | 5 |
| 12 | 1208.542973 | 604.775124 | 1191.516424 | 596.261850 | 1190.532408 | 595.769842 | G | 376.219061 | 188.613168 | 359.192512 | 180.099894 | 358.208496 | 179.607886 | 4 |
| 13 | 1279.580087 | 640.293681 | 1262.553538 | 631.780407 | 1261.569522 | 631.288399 | A | 319.197597 | 160.102436 | 302.171048 | 151.589162 | 301.187032 | 151.097154 | 3 |
| 14 | 1380.627766 | 690.817521 | 1363.601217 | 682.304246 | 1362.617201 | 681.812238 | T | 248.160483 | 124.583879 | 231.133934 | 116.070605 | 230.149918 | 115.578597 | 2 |
| 15 |             |            |             |            |             |            | K | 147.112804 | 74.060040  | 130.086255 | 65.546765  |            |            | 1 |

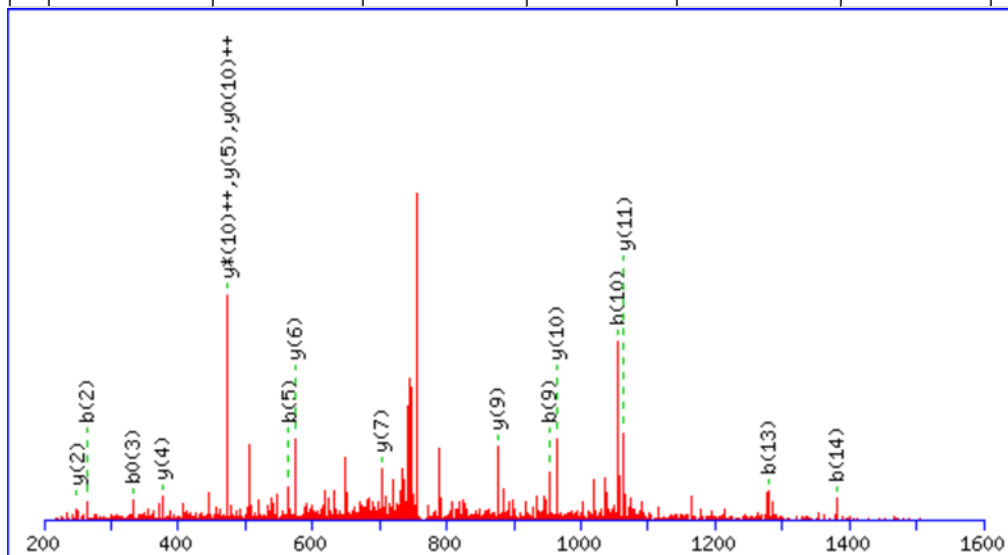

## Peptide View

MS/MS Fragmentation of **GLDTSLGAVQSDTGR**

Found in **IP100289931**, Tax\_Id=9606 Gene\_Symbol=MADCAM1 MADCAM1 protein

**Experiment:** 35 - OPB-2 **Fraction:** OPB-2

Match to Query 8684: 1475.721848 from(738.868200,2+)

Title: OECHL100312\_03.11438.11438.2.dta

Data file \\BOROMIR\Masse\Data LTQ-Orbitrap\Chrystelle Lacroix\Etude clinique sJPU\OECHL100312\_03.raw



**Monoisotopic mass of neutral peptide Mr(calc):** 1475.721619**Fixed modifications:** Carbamidomethyl (C) (apply to specified residues or termini only)**Ions Score:** 71  
**Expect:** 1.1e-005**Matches :** 30/142 fragment ions using 52 most intense peaks ([help](#))

| #  | b                  | b <sup>++</sup> | b*          | b <sup>*++</sup> | b <sup>0</sup>     | b <sup>0++</sup> | Seq. | y                  | y <sup>++</sup> | y*          | y <sup>*++</sup>  | y <sup>0</sup> | y <sup>0++</sup>  | #  |
|----|--------------------|-----------------|-------------|------------------|--------------------|------------------|------|--------------------|-----------------|-------------|-------------------|----------------|-------------------|----|
| 1  | 58.028740          | 29.518008       |             |                  |                    |                  | G    |                    |                 |             |                   |                |                   | 15 |
| 2  | 171.112804         | 86.060040       |             |                  |                    |                  | L    | 1419.707414        | 710.357345      | 1402.680865 | 701.844071        | 1401.696849    | 701.352063        | 14 |
| 3  | <b>286.139747</b>  | 143.573512      |             |                  | 268.129182         | 134.568229       | D    | 1306.623350        | 653.815313      | 1289.596801 | 645.302039        | 1288.612785    | <b>644.810031</b> | 13 |
| 4  | <b>387.187426</b>  | 194.097351      |             |                  | 369.176861         | 185.092069       | T    | <b>1191.596407</b> | 596.301842      | 1174.569858 | <b>587.788567</b> | 1173.585842    | <b>587.296559</b> | 12 |
| 5  | <b>474.219454</b>  | 237.613365      |             |                  | <b>456.208889</b>  | 228.608082       | S    | <b>1090.548728</b> | 545.778002      | 1073.522179 | 537.264728        | 1072.538163    | 536.772719        | 11 |
| 6  | <b>587.303518</b>  | 294.155397      |             |                  | <b>569.292953</b>  | 285.150115       | L    | <b>1003.516700</b> | 502.261988      | 986.490151  | 493.748714        | 985.506135     | 493.256706        | 10 |
| 7  | <b>644.324982</b>  | 322.666129      |             |                  | 626.314417         | 313.660847       | G    | <b>890.432636</b>  | 445.719956      | 873.406087  | 437.206682        | 872.422071     | 436.714674        | 9  |
| 8  | <b>715.362096</b>  | 358.184686      |             |                  | <b>697.351531</b>  | 349.179404       | A    | <b>833.411172</b>  | 417.209224      | 816.384623  | 408.695950        | 815.400607     | 408.203942        | 8  |
| 9  | <b>814.430510</b>  | 407.718893      |             |                  | 796.419945         | 398.713611       | V    | <b>762.374058</b>  | 381.690667      | 745.347509  | 373.177393        | 744.363493     | 372.685385        | 7  |
| 10 | <b>942.489088</b>  | 471.748182      | 925.462539  | 463.234908       | <b>924.478523</b>  | 462.742900       | Q    | <b>663.305644</b>  | 332.156460      | 646.279095  | 323.643186        | 645.295079     | 323.151178        | 6  |
| 11 | <b>1029.521116</b> | 515.264196      | 1012.494567 | 506.750922       | 1011.510551        | 506.258914       | S    | <b>535.247066</b>  | 268.127171      | 518.220517  | 259.613897        | 517.236501     | 259.121889        | 5  |
| 12 | <b>1144.548059</b> | 572.777668      | 1127.521510 | 564.264393       | 1126.537494        | 563.772385       | D    | <b>448.215038</b>  | 224.611157      | 431.188489  | 216.097882        | 430.204473     | 215.605874        | 4  |
| 13 | <b>1245.595738</b> | 623.301507      | 1228.569189 | 614.788233       | <b>1227.585173</b> | 614.296225       | T    | <b>333.188095</b>  | 167.097685      | 316.161546  | 158.584411        | 315.177530     | 158.092403        | 3  |
| 14 | 1302.617202        | 651.812239      | 1285.590653 | 643.298965       | 1284.606637        | 642.806957       | G    | <b>232.140416</b>  | 116.573846      | 215.113867  | 108.060571        |                |                   | 2  |
| 15 |                    |                 |             |                  |                    |                  | R    | 175.118952         | 88.063114       | 158.092403  | 79.549839         |                |                   | 1  |

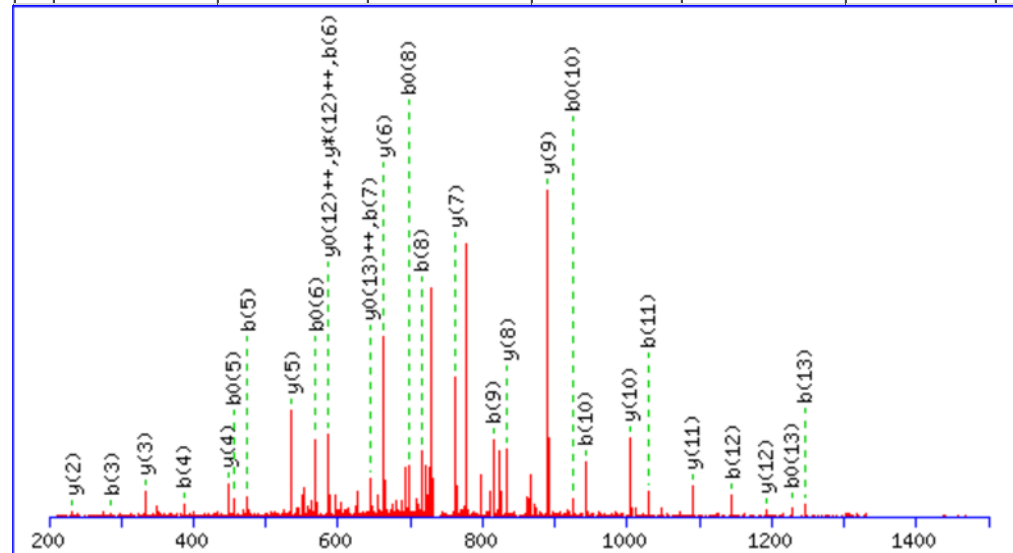

## Peptide View

MS/MS Fragmentation of **LLIYDASNLETGVPSR**

Found in **IPI00003111**, Tax\_Id=9606 Gene\_Symbol=LOC652694 Ig kappa chain V-I region AU

**Experiment:** 35 - OPB-2 **Fraction:** OPB-2

Match to Query 11449: 1746.913848 from(874.464200,2+)

Title: OECHL100312\_03.16952.16952.2.dta

Data file \\BOROMIR\Masse\Data LTQ-Orbitrap\Chrystelle Lacroix\Etude clinique sJPU\OECHL100312\_03.raw

**Monoisotopic mass of neutral peptide Mr(calc):** 1746.915192**Fixed modifications:** Carbamidomethyl (C) (apply to specified residues or termini only)**Ions Score:** 68

**Expect:** 1.8e-005**Matches :** 43/156 fragment ions using 86 most intense peaks ([help](#))

| #  | b                  | b <sup>++</sup>   | b*                 | b <sup>*++</sup> | b <sup>0</sup>     | b <sup>0++</sup> | Seq. | y                  | y <sup>++</sup>   | y*                | y <sup>*++</sup>  | y <sup>0</sup>     | y <sup>0++</sup>  | #  |
|----|--------------------|-------------------|--------------------|------------------|--------------------|------------------|------|--------------------|-------------------|-------------------|-------------------|--------------------|-------------------|----|
| 1  | 114.091340         | 57.549308         |                    |                  |                    |                  | L    |                    |                   |                   |                   |                    |                   | 16 |
| 2  | 227.175404         | 114.091340        |                    |                  |                    |                  | L    | 1634.838427        | 817.922852        | 1617.811878       | 809.409577        | 1616.827862        | 808.917569        | 15 |
| 3  | <b>340.259468</b>  | 170.633372        |                    |                  |                    |                  | I    | <b>1521.754363</b> | <b>761.380820</b> | 1504.727814       | 752.867545        | 1503.743798        | 752.375537        | 14 |
| 4  | <b>503.322797</b>  | 252.165036        |                    |                  |                    |                  | Y    | <b>1408.670299</b> | <b>704.838788</b> | 1391.643750       | <b>696.325513</b> | <b>1390.659734</b> | <b>695.833505</b> | 13 |
| 5  | <b>618.349740</b>  | 309.678508        |                    |                  | 600.339175         | 300.673226       | D    | <b>1245.606970</b> | 623.307123        | 1228.580421       | 614.793849        | 1227.596405        | 614.301841        | 12 |
| 6  | <b>689.386854</b>  | <b>345.197065</b> |                    |                  | 671.376289         | 336.191782       | A    | <b>1130.580027</b> | 565.793652        | 1113.553478       | 557.280377        | 1112.569462        | 556.788369        | 11 |
| 7  | <b>776.418882</b>  | <b>388.713079</b> |                    |                  | 758.408317         | 379.707796       | S    | <b>1059.542913</b> | <b>530.275095</b> | 1042.516364       | 521.761820        | 1041.532348        | 521.269812        | 10 |
| 8  | 890.461809         | 445.734542        | <b>873.435260</b>  | 437.221268       | 872.451244         | 436.729260       | N    | <b>972.510885</b>  | 486.759081        | 955.484336        | 478.245806        | 954.500320         | 477.753798        | 9  |
| 9  | <b>1003.545873</b> | 502.276574        | <b>986.519324</b>  | 493.763300       | <b>985.535308</b>  | 493.271292       | L    | <b>858.467958</b>  | 429.737617        | 841.441409        | 421.224343        | 840.457393         | 420.732335        | 8  |
| 10 | <b>1132.588466</b> | 566.797871        | 1115.561917        | 558.284597       | 1114.577901        | 557.792588       | E    | <b>745.383894</b>  | 373.195585        | 728.357345        | 364.682311        | 727.373329         | 364.190303        | 7  |
| 11 | <b>1233.636145</b> | <b>617.321710</b> | <b>1216.609596</b> | 608.808436       | 1215.625580        | 608.316428       | T    | <b>616.341301</b>  | 308.674289        | 599.314752        | 300.161014        | 598.330736         | 299.669006        | 6  |
| 12 | <b>1290.657609</b> | 645.832442        | <b>1273.631060</b> | 637.319168       | <b>1272.647044</b> | 636.827160       | G    | <b>515.293622</b>  | 258.150449        | 498.267073        | 249.637175        | 497.283057         | 249.145167        | 5  |
| 13 | <b>1389.726023</b> | 695.366649        | <b>1372.699474</b> | 686.853375       | <b>1371.715458</b> | 686.361367       | V    | <b>458.272158</b>  | 229.639717        | <b>441.245609</b> | 221.126443        | 440.261593         | 220.634435        | 4  |
| 14 | 1486.778787        | 743.893032        | 1469.752238        | 735.379757       | 1468.768222        | 734.887749       | P    | <b>359.203744</b>  | 180.105510        | <b>342.177195</b> | 171.592236        | <b>341.193179</b>  | 171.100228        | 3  |
| 15 | <b>1573.810815</b> | 787.409046        | 1556.784266        | 778.895771       | 1555.800250        | 778.403763       | S    | 262.150980         | 131.579128        | 245.124431        | 123.065854        | 244.140415         | 122.573846        | 2  |
| 16 |                    |                   |                    |                  |                    |                  | R    | 175.118952         | 88.063114         | 158.092403        | 79.549839         |                    |                   | 1  |

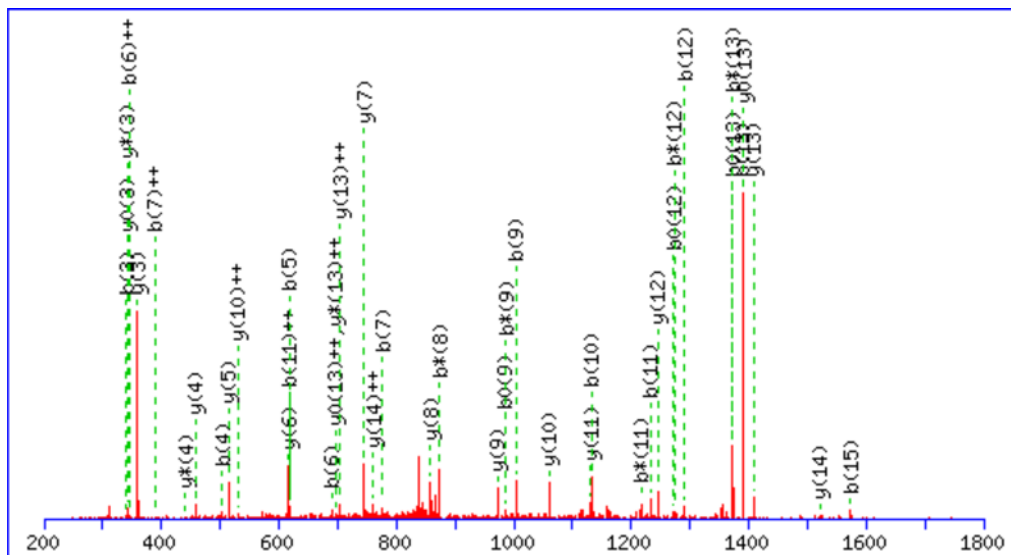

## Peptide View

MS/MS Fragmentation of **GLAEAAGPR**

Found in **IPI00290826**, Tax\_Id=9606 Gene\_Symbol=FAM174A Membrane protein FAM174A

**Experiment:** 35 - OPB-2 **Fraction:** OPB-2

Match to Query 1086: 840.446648 from(421.230600,2+)

Title: OECHL100312\_03.4180.4180.2.dta

Data file \\BOROMIR\Masse\Data LTQ-Orbitrap\Chrystelle Lacroix\Etude clinique sJPU\OECHL100312\_03.raw

**Monoisotopic mass of neutral peptide Mr(calc):** 840.445343 **Fixed modifications:** Carbamidomethyl (C) (apply to specified residues or termini only) **Ions Score:** 51

**Expect:** 0.00053 **Matches :** 10/64 fragment ions using 14 most intense peaks ([help](#))

| # | b                 | b <sup>++</sup> | b <sup>0</sup> | b <sup>0++</sup> | Seq. | y                 | y <sup>++</sup> | y <sup>*</sup> | y <sup>*++</sup> | y <sup>0</sup> | y <sup>0++</sup> | # |
|---|-------------------|-----------------|----------------|------------------|------|-------------------|-----------------|----------------|------------------|----------------|------------------|---|
| 1 | 58.028740         | 29.518008       |                |                  | G    |                   |                 |                |                  |                |                  | 9 |
| 2 | <b>171.112804</b> | 86.060040       |                |                  | L    | 784.431179        | 392.719228      | 767.404630     | 384.205953       | 766.420614     | 383.713945       | 8 |
| 3 | <b>242.149918</b> | 121.578597      |                |                  | A    | <b>671.347115</b> | 336.177196      | 654.320566     | 327.663921       | 653.336550     | 327.171913       | 7 |
| 4 | 371.192511        | 186.099894      | 353.181946     | 177.094611       | E    | <b>600.310001</b> | 300.658639      | 583.283452     | 292.145364       | 582.299436     | 291.653356       | 6 |
| 5 | 442.229625        | 221.618450      | 424.219060     | 212.613168       | A    | <b>471.267408</b> | 236.137342      | 454.240859     | 227.624067       |                |                  | 5 |
| 6 | <b>513.266739</b> | 257.137008      | 495.256174     | 248.131725       | A    | <b>400.230294</b> | 200.618785      | 383.203745     | 192.105510       |                |                  | 4 |

|   |                   |            |            |            |   |                   |            |            |            |  |  |   |
|---|-------------------|------------|------------|------------|---|-------------------|------------|------------|------------|--|--|---|
| 7 | <b>570.288203</b> | 285.647740 | 552.277638 | 276.642457 | G | <b>329.193180</b> | 165.100228 | 312.166631 | 156.586953 |  |  | 3 |
| 8 | 667.340967        | 334.174122 | 649.330402 | 325.168839 | P | <b>272.171716</b> | 136.589496 | 255.145167 | 128.076221 |  |  | 2 |
| 9 |                   |            |            |            | R | 175.118952        | 88.063114  | 158.092403 | 79.549839  |  |  | 1 |

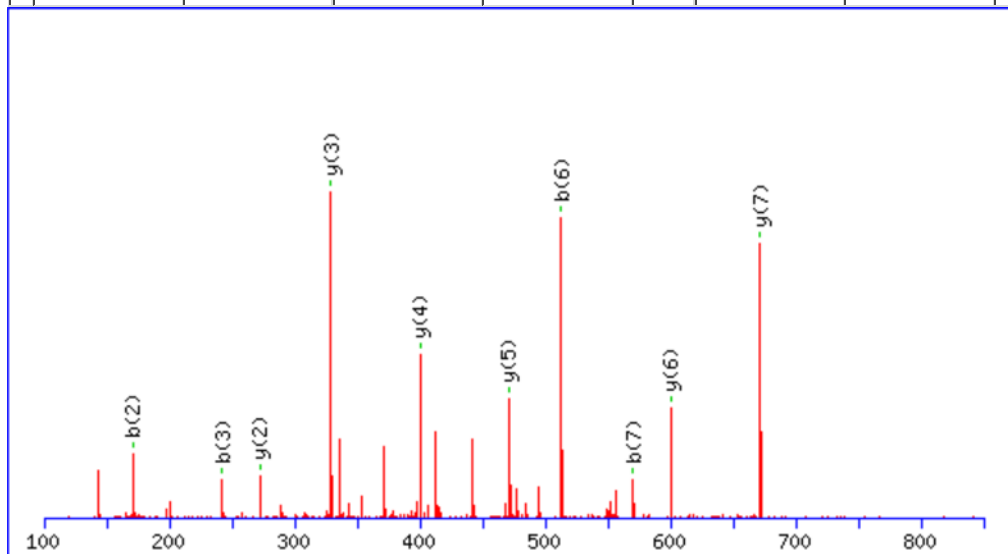

## Peptide View

MS/MS Fragmentation of **SDAAVDTSEITTK**

Found in **IPI00412977**, Tax\_Id=9606 Gene\_Symbol=- Prothymosin alpha

**Experiment:** 35 - OPB-2 **Fraction:** OPB-2

Match to Query 8538: 1465.680448 from(733.847500,2+)

Title: OECHL100312\_03.9908.9908.2.dta

Data file \\BOROMIR\Masse\Data LTQ-Orbitrap\Chrystelle Lacroix\Etude clinique sJPU\OECHL100312\_03.raw

**Monoisotopic mass of neutral peptide Mr(calc):** 1465.678391 **Fixed modifications:** Carbamidomethyl (C) (apply to specified residues or termini only) **Variable modifications:** N-term : Acetyl (N-term) **Ions Score:** 56 **Expect:** 0.00024 **Matches :** 24/128 fragment ions using 50 most intense peaks ([help](#))

| # | b                 | b <sup>++</sup> | b <sup>0</sup> | b <sup>0++</sup> | Seq. | y                  | y <sup>++</sup> | y*                 | y <sup>*++</sup> | y <sup>0</sup>     | y <sup>0++</sup> | #  |
|---|-------------------|-----------------|----------------|------------------|------|--------------------|-----------------|--------------------|------------------|--------------------|------------------|----|
| 1 | 130.049869        | 65.528572       | 112.039304     | 56.523290        | S    |                    |                 |                    |                  |                    |                  | 14 |
| 2 | 245.076812        | 123.042044      | 227.066247     | 114.036761       | D    | <b>1337.643082</b> | 669.325179      | <b>1320.616533</b> | 660.811905       | <b>1319.632517</b> | 660.319897       | 13 |
| 3 | <b>316.113926</b> | 158.560601      | 298.103361     | 149.555319       | A    | 1222.616139        | 611.811708      | 1205.589590        | 603.298433       | 1204.605574        | 602.806425       | 12 |

|    |                    |                   |                    |            |   |                    |                   |             |                   |                   |            |           |
|----|--------------------|-------------------|--------------------|------------|---|--------------------|-------------------|-------------|-------------------|-------------------|------------|-----------|
| 4  | <b>387.151040</b>  | 194.079158        | 369.140475         | 185.073875 | A | <b>1151.579025</b> | 576.293151        | 1134.552476 | 567.779876        | 1133.568460       | 567.287868 | <b>11</b> |
| 5  | <b>486.219454</b>  | 243.613365        | 468.208889         | 234.608082 | V | <b>1080.541911</b> | 540.774594        | 1063.515362 | 532.261319        | 1062.531346       | 531.769311 | <b>10</b> |
| 6  | 601.246397         | 301.126837        | 583.235832         | 292.121554 | D | <b>981.473497</b>  | 491.240387        | 964.446948  | 482.727112        | <b>963.462932</b> | 482.235104 | <b>9</b>  |
| 7  | 702.294076         | 351.650676        | 684.283511         | 342.645394 | T | <b>866.446554</b>  | 433.726915        | 849.420005  | 425.213641        | 848.435989        | 424.721633 | <b>8</b>  |
| 8  | 789.326104         | 395.166690        | 771.315539         | 386.161408 | S | 765.398875         | 383.203076        | 748.372326  | 374.689801        | 747.388310        | 374.197793 | <b>7</b>  |
| 9  | 876.358132         | 438.682704        | 858.347567         | 429.677421 | S | <b>678.366847</b>  | 339.687062        | 661.340298  | 331.173787        | 660.356282        | 330.681779 | <b>6</b>  |
| 10 | 1005.400725        | 503.204001        | <b>987.390160</b>  | 494.198718 | E | <b>591.334819</b>  | <b>296.171048</b> | 574.308270  | <b>287.657773</b> | 573.324254        | 287.165765 | <b>5</b>  |
| 11 | <b>1118.484789</b> | <b>559.746033</b> | 1100.474224        | 550.740750 | I | <b>462.292226</b>  | 231.649751        | 445.265677  | 223.136477        | 444.281661        | 222.644469 | <b>4</b>  |
| 12 | <b>1219.532468</b> | 610.269872        | 1201.521903        | 601.264590 | T | <b>349.208162</b>  | 175.107719        | 332.181613  | 166.594445        | 331.197597        | 166.102437 | <b>3</b>  |
| 13 | <b>1320.580147</b> | 660.793712        | <b>1302.569582</b> | 651.788429 | T | <b>248.160483</b>  | 124.583879        | 231.133934  | 116.070605        | 230.149918        | 115.578597 | <b>2</b>  |
| 14 |                    |                   |                    |            | K | 147.112804         | 74.060040         | 130.086255  | 65.546765         |                   |            | <b>1</b>  |

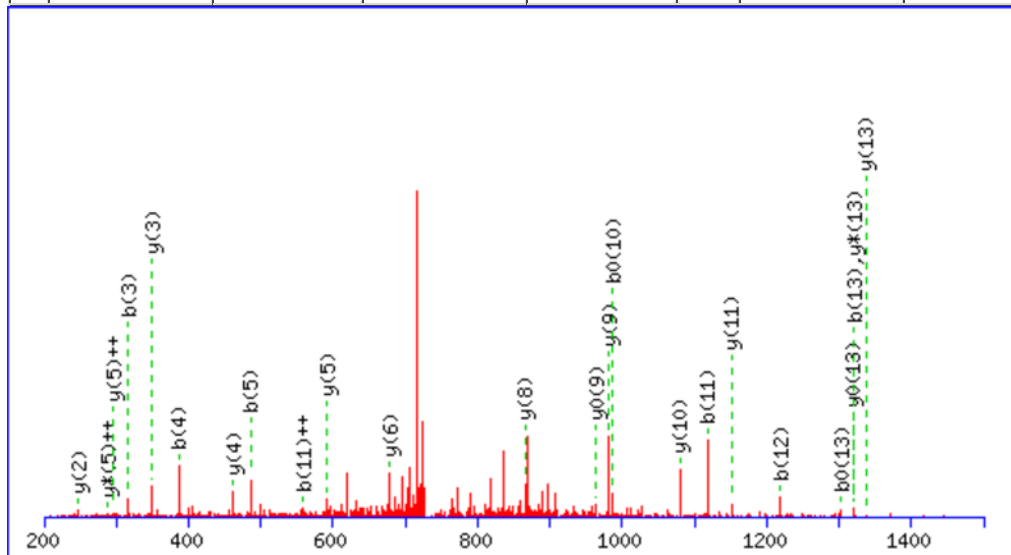

## Peptide View

MS/MS Fragmentation of **ATKIDKEACR**

Found in **IP100017704**, Tax\_Id=9606 Gene\_Symbol=COTL1 Coactosin-like protein

**Experiment:** 35 - OPB-2 **Fraction:** OPB-2

Match to Query 5881: 1232.618172 from(411.880000,3+)

Title: OECHL100312\_03.3912.3912.3.dta

Data file \\BOROMIR\Masse\Data LTQ-Orbitrap\Chrystelle Lacroix\Etude clinique sJPU\OECHL100312\_03.raw

**Monoisotopic mass of neutral peptide Mr(calc):** 1232.618286**Fixed modifications:** Carbamidomethyl (C) (apply to specified residues or termini only)**Variable****modifications:** N-term : Acetyl (N-term)**Ions Score:** 50 **Expect:** 0.0011**Matches :** 20/96 fragment ions using 27 most intense peaks ([help](#))

| #  | b                 | b <sup>++</sup> | b*          | b <sup>*++</sup>  | b <sup>0</sup>    | b <sup>0++</sup>  | Seq. | y                  | y <sup>++</sup>   | y*          | y <sup>*++</sup>  | y <sup>0</sup>    | y <sup>0++</sup> | #  |
|----|-------------------|-----------------|-------------|-------------------|-------------------|-------------------|------|--------------------|-------------------|-------------|-------------------|-------------------|------------------|----|
| 1  | 114.054955        | 57.531116       |             |                   |                   |                   | A    |                    |                   |             |                   |                   |                  | 10 |
| 2  | <b>215.102634</b> | 108.054955      |             |                   | 197.092069        | 99.049672         | T    | 1120.577920        | <b>560.792598</b> | 1103.551371 | 552.279324        | 1102.567355       | 551.787316       | 9  |
| 3  | 343.197597        | 172.102436      | 326.171048  | 163.589162        | <b>325.187032</b> | 163.097154        | K    | <b>1019.530241</b> | <b>510.268759</b> | 1002.503692 | 501.755484        | 1001.519676       | 501.263476       | 8  |
| 4  | 456.281661        | 228.644468      | 439.255112  | 220.131194        | 438.271096        | 219.639186        | I    | <b>891.435278</b>  | <b>446.221277</b> | 874.408729  | 437.708003        | <b>873.424713</b> | 437.215995       | 7  |
| 5  | <b>571.308604</b> | 286.157940      | 554.282055  | 277.644665        | 553.298039        | 277.152657        | D    | <b>778.351214</b>  | 389.679245        | 761.324665  | 381.165971        | <b>760.340649</b> | 380.673963       | 6  |
| 6  | <b>699.403567</b> | 350.205422      | 682.377018  | 341.692147        | 681.393002        | 341.200139        | K    | <b>663.324271</b>  | <b>332.165774</b> | 646.297722  | <b>323.652499</b> | 645.313706        | 323.160491       | 5  |
| 7  | 828.446160        | 414.726718      | 811.419611  | <b>406.213443</b> | 810.435595        | <b>405.721435</b> | E    | <b>535.229308</b>  | 268.118292        | 518.202759  | 259.605018        | 517.218743        | 259.113010       | 4  |
| 8  | 899.483274        | 450.245275      | 882.456725  | 441.732000        | 881.472709        | 441.239992        | A    | <b>406.186715</b>  | 203.596996        | 389.160166  | 195.083721        |                   |                  | 3  |
| 9  | 1059.513923       | 530.260600      | 1042.487374 | 521.747325        | 1041.503358       | 521.255317        | C    | 335.149601         | 168.078439        | 318.123052  | 159.565164        |                   |                  | 2  |
| 10 |                   |                 |             |                   |                   |                   | R    | <b>175.118952</b>  | 88.063114         | 158.092403  | 79.549840         |                   |                  | 1  |

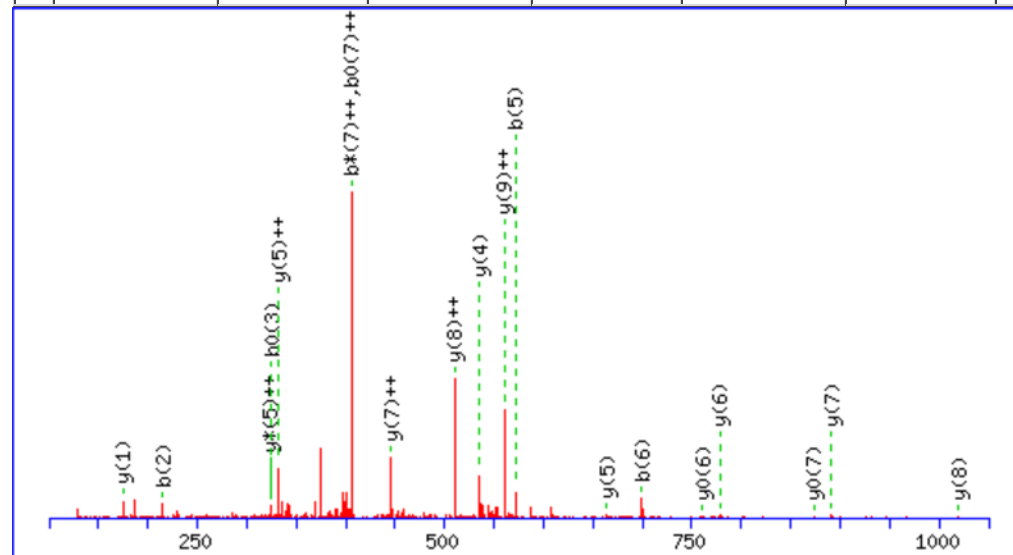

## Peptide View

MS/MS Fragmentation of **VYIASSSGSTAIK**Found in **IPI00025318**, Tax\_Id=9606 Gene\_Symbol=SH3BGRL SH3 domain-binding glutamic acid-rich-like protein**Experiment:** 35 - OPB-2 **Fraction:** OPB-2

Match to Query 6718: 1282.676648 from(642.345600,2+)

Title: OECHL100312\_03.8004.8004.2.dta

Data file \\BOROMIR\Masse\Data LTQ-Orbitrap\Chrystelle Lacroix\Etude clinique sJPU\OECHL100312\_03.raw

**Monoisotopic mass of neutral peptide Mr(calc):** 1282.676865 **Fixed modifications:** Carbamidomethyl (C) (apply to specified residues or termini only) **Ions Score:** 55**Expect:** 0.00025 **Matches :** 28/106 fragment ions using 64 most intense peaks ([help](#))

| #  | b                  | b <sup>++</sup> | b <sup>0</sup>     | b <sup>0++</sup>  | Seq. | y                  | y <sup>++</sup>   | y <sup>*</sup>    | y <sup>*++</sup> | y <sup>0</sup>     | y <sup>0++</sup> | #  |
|----|--------------------|-----------------|--------------------|-------------------|------|--------------------|-------------------|-------------------|------------------|--------------------|------------------|----|
| 1  | 100.075690         | 50.541483       |                    |                   | V    |                    |                   |                   |                  |                    |                  | 13 |
| 2  | <b>263.139019</b>  | 132.073148      |                    |                   | Y    | <b>1184.615744</b> | 592.811510        | 1167.589195       | 584.298236       | 1166.605179        | 583.806227       | 12 |
| 3  | <b>376.223083</b>  | 188.615180      |                    |                   | I    | <b>1021.552415</b> | <b>511.279846</b> | 1004.525866       | 502.766571       | <b>1003.541850</b> | 502.274563       | 11 |
| 4  | <b>447.260197</b>  | 224.133737      |                    |                   | A    | <b>908.468351</b>  | 454.737814        | <b>891.441802</b> | 446.224539       | <b>890.457786</b>  | 445.732531       | 10 |
| 5  | <b>534.292225</b>  | 267.649751      | 516.281660         | 258.644468        | S    | <b>837.431237</b>  | <b>419.219257</b> | 820.404688        | 410.705982       | 819.420672         | 410.213974       | 9  |
| 6  | <b>621.324253</b>  | 311.165765      | 603.313688         | 302.160482        | S    | <b>750.399209</b>  | 375.703243        | 733.372660        | 367.189968       | 732.388644         | 366.697960       | 8  |
| 7  | 708.356281         | 354.681779      | <b>690.345716</b>  | 345.676496        | S    | <b>663.367181</b>  | 332.187229        | 646.340632        | 323.673954       | 645.356616         | 323.181946       | 7  |
| 8  | 765.377745         | 383.192511      | 747.367180         | 374.187228        | G    | <b>576.335153</b>  | 288.671215        | 559.308604        | 280.157940       | 558.324588         | 279.665932       | 6  |
| 9  | <b>852.409773</b>  | 426.708525      | 834.399208         | 417.703242        | S    | 519.313689         | <b>260.160483</b> | 502.287140        | 251.647208       | 501.303124         | 251.155200       | 5  |
| 10 | 953.457452         | 477.232364      | 935.446887         | <b>468.227082</b> | T    | <b>432.281661</b>  | 216.644468        | 415.255112        | 208.131194       | 414.271096         | 207.639186       | 4  |
| 11 | <b>1024.494566</b> | 512.750921      | <b>1006.484001</b> | 503.745638        | A    | <b>331.233982</b>  | 166.120629        | 314.207433        | 157.607354       |                    |                  | 3  |
| 12 | <b>1137.578630</b> | 569.292953      | <b>1119.568065</b> | 560.287670        | I    | <b>260.196868</b>  | 130.602072        | 243.170319        | 122.088798       |                    |                  | 2  |
| 13 |                    |                 |                    |                   | K    | 147.112804         | 74.060040         | 130.086255        | 65.546765        |                    |                  | 1  |

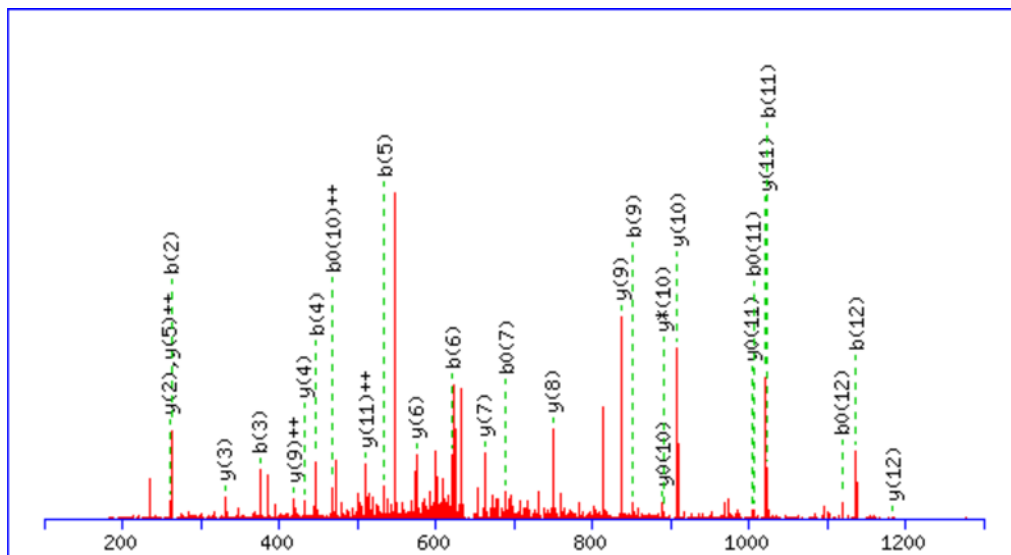

## Peptide View

MS/MS Fragmentation of **LAADDPEVR**

Found in **IPI00025840**, Tax\_Id=9606 Gene\_Symbol=EFNA1 Isoform 1 of Ephrin-A1

**Experiment:** 35 - OPB-2 **Fraction:** OPB-2

Match to Query 2515: 984.488248 from(493.251400,2+)

Title: OECHL100312\_03.5059.5059.2.dta

Data file \\BOROMIR\Masse\Data LTQ-Orbitrap\Chrystelle Lacroix\Etude clinique sJPU\OECHL100312\_03.raw

**Monoisotopic mass of neutral peptide Mr(calc):** 984.487610 **Fixed modifications:** Carbamidomethyl (C) (apply to specified residues or termini only) **Ions Score:** 52

**Expect:** 0.00051 **Matches :** 16/70 fragment ions using 27 most intense peaks ([help](#))

| # | b                 | b <sup>++</sup> | b <sup>0</sup> | b <sup>0++</sup> | Seq. | y                 | y <sup>++</sup>   | y*         | y <sup>*++</sup> | y <sup>0</sup>    | y <sup>0++</sup> | # |
|---|-------------------|-----------------|----------------|------------------|------|-------------------|-------------------|------------|------------------|-------------------|------------------|---|
| 1 | 114.091340        | 57.549308       |                |                  | L    |                   |                   |            |                  |                   |                  | 9 |
| 2 | <b>185.128454</b> | 93.067865       |                |                  | A    | <b>872.410837</b> | <b>436.709057</b> | 855.384288 | 428.195782       | 854.400272        | 427.703774       | 8 |
| 3 | <b>256.165568</b> | 128.586422      |                |                  | A    | <b>801.373723</b> | <b>401.190500</b> | 784.347174 | 392.677225       | 783.363158        | 392.185217       | 7 |
| 4 | <b>371.192511</b> | 186.099893      | 353.181946     | 177.094611       | D    | <b>730.336609</b> | 365.671943        | 713.310060 | 357.158668       | <b>712.326044</b> | 356.666660       | 6 |
| 5 | <b>486.219454</b> | 243.613365      | 468.208889     | 234.608082       | D    | <b>615.309666</b> | 308.158471        | 598.283117 | 299.645197       | 597.299101        | 299.153189       | 5 |
| 6 | 583.272218        | 292.139747      | 565.261653     | 283.134465       | P    | <b>500.282723</b> | 250.644999        | 483.256174 | 242.131725       | 482.272158        | 241.639717       | 4 |



|   |                   |            |            |            |   |                   |            |            |            |            |            |   |
|---|-------------------|------------|------------|------------|---|-------------------|------------|------------|------------|------------|------------|---|
| 7 | <b>712.314811</b> | 356.661044 | 694.304246 | 347.655761 | E | 403.229959        | 202.118617 | 386.203410 | 193.605343 | 385.219394 | 193.113335 | 3 |
| 8 | <b>811.383225</b> | 406.195251 | 793.372660 | 397.189968 | V | <b>274.187366</b> | 137.597321 | 257.160817 | 129.084046 |            |            | 2 |
| 9 |                   |            |            |            | R | <b>175.118952</b> | 88.063114  | 158.092403 | 79.549839  |            |            | 1 |

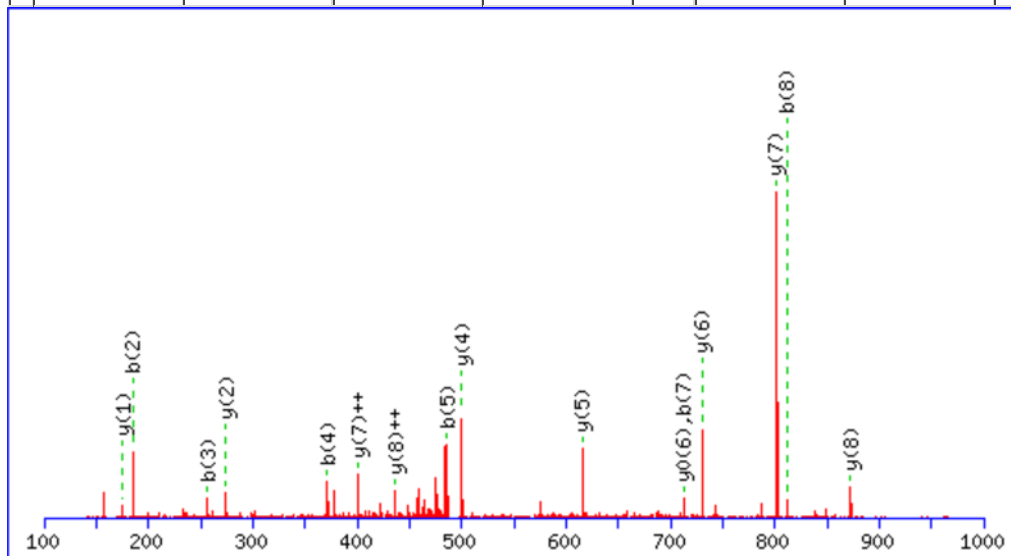

## Peptide View

MS/MS Fragmentation of **ATGDIKVTESEIK**

Found in **IPI00302614**, Tax\_Id=9606 Gene\_Symbol=VTCN1 V-set domain containing T cell activation inhibitor 1

**Experiment:** 35 - OPB-2 **Fraction:** OPB-2

Match to Query 7845: 1389.736048 from(695.875300,2+)

Title: OECHL100312\_03.8213.8213.2.dta

Data file \\BOROMIR\Masse\Data LTQ-Orbitrap\Chrystelle Lacroix\Etude clinique sJPU\OECHL100312\_03.raw

**Monoisotopic mass of neutral peptide Mr(calc):** 1389.735107 **Fixed modifications:** Carbamidomethyl (C) (apply to specified residues or termini only) **Ions Score:** 51

**Expect:** 0.00065 **Matches :** 24/128 fragment ions using 36 most intense peaks ([help](#))

| # | b          | b <sup>++</sup> | b* | b <sup>*++</sup> | b <sup>0</sup> | b <sup>0++</sup> | Seq. | y                  | y <sup>++</sup>   | y*          | y <sup>*++</sup> | y <sup>0</sup> | y <sup>0++</sup> | #  |
|---|------------|-----------------|----|------------------|----------------|------------------|------|--------------------|-------------------|-------------|------------------|----------------|------------------|----|
| 1 | 72.044390  | 36.525833       |    |                  |                |                  | A    |                    |                   |             |                  |                |                  | 13 |
| 2 | 173.092069 | 87.049672       |    |                  | 155.081504     | 78.044390        | T    | <b>1319.705288</b> | 660.356282        | 1302.678739 | 651.843008       | 1301.694723    | 651.350999       | 12 |
| 3 | 230.113533 | 115.560404      |    |                  | 212.102968     | 106.555122       | G    | <b>1218.657609</b> | <b>609.832442</b> | 1201.631060 | 601.319168       | 1200.647044    | 600.827160       | 11 |

|    |                    |                   |             |            |                    |            |          |                    |                   |             |                   |                   |                   |           |
|----|--------------------|-------------------|-------------|------------|--------------------|------------|----------|--------------------|-------------------|-------------|-------------------|-------------------|-------------------|-----------|
| 4  | <b>345.140476</b>  | 173.073876        |             |            | 327.129911         | 164.068593 | <b>D</b> | 1161.636145        | <b>581.321710</b> | 1144.609596 | 572.808436        | 1143.625580       | 572.316428        | <b>10</b> |
| 5  | <b>458.224540</b>  | 229.615908        |             |            | <b>440.213975</b>  | 220.610626 | <b>I</b> | <b>1046.609202</b> | <b>523.808239</b> | 1029.582653 | 515.294964        | 1028.598637       | 514.802956        | <b>9</b>  |
| 6  | 586.319503         | 293.663390        | 569.292954  | 285.150115 | 568.308938         | 284.658107 | <b>K</b> | <b>933.525138</b>  | 467.266207        | 916.498589  | 458.752932        | 915.514573        | <b>458.260924</b> | <b>8</b>  |
| 7  | 685.387917         | 343.197597        | 668.361368  | 334.684322 | 667.377352         | 334.192314 | <b>V</b> | <b>805.430175</b>  | 403.218725        | 788.403626  | 394.705451        | <b>787.419610</b> | 394.213443        | <b>7</b>  |
| 8  | 786.435596         | 393.721436        | 769.409047  | 385.208162 | 768.425031         | 384.716154 | <b>T</b> | <b>706.361761</b>  | 353.684518        | 689.335212  | <b>345.171244</b> | 688.351196        | 344.679236        | <b>6</b>  |
| 9  | 915.478189         | <b>458.242733</b> | 898.451640  | 449.729458 | 897.467624         | 449.237450 | <b>E</b> | 605.314082         | 303.160679        | 588.287533  | 294.647404        | 587.303517        | 294.155396        | <b>5</b>  |
| 10 | <b>1002.510217</b> | 501.758747        | 985.483668  | 493.245472 | 984.499652         | 492.753464 | <b>S</b> | <b>476.271489</b>  | 238.639382        | 459.244940  | 230.126108        | <b>458.260924</b> | 229.634100        | <b>4</b>  |
| 11 | <b>1131.552810</b> | 566.280043        | 1114.526261 | 557.766769 | <b>1113.542245</b> | 557.274760 | <b>E</b> | 389.239461         | 195.123368        | 372.212912  | 186.610094        | <b>371.228896</b> | 186.118086        | <b>3</b>  |
| 12 | <b>1244.636874</b> | 622.822075        | 1227.610325 | 614.308800 | 1226.626309        | 613.816792 | <b>I</b> | <b>260.196868</b>  | 130.602072        | 243.170319  | 122.088797        |                   |                   | <b>2</b>  |
| 13 |                    |                   |             |            |                    |            | <b>K</b> | 147.112804         | 74.060040         | 130.086255  | 65.546765         |                   |                   | <b>1</b>  |

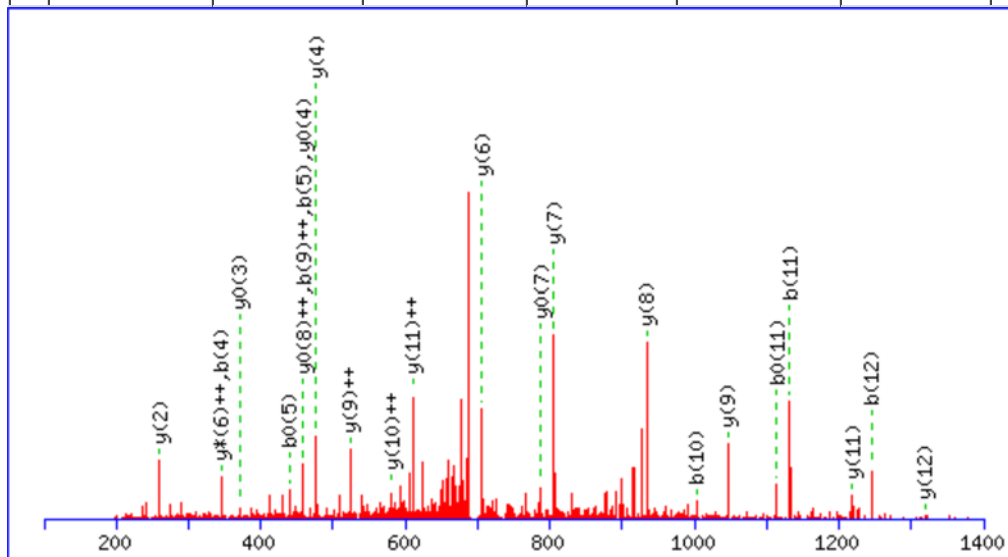

## Peptide View

MS/MS Fragmentation of **YDIALVQEV**R

Found in **IP100031065**, Tax\_Id=9606 Gene\_Symbol=DNASE1 Deoxyribonuclease-1

**Experiment: 35 - OPB-2 Fraction: OPB-2**

Match to Query 5397: 1204.646248 from(603.330400,2+)

Title: OECHL100312\_03.15537.15537.2.dta

Data file \\BOROMIR\Masse\Data LTQ-Orbitrap\Chrystelle Lacroix\Etude clinique sJPU\OECHL100312\_03.raw

**Monoisotopic mass of neutral peptide Mr(calc):** 1204.645172**Fixed modifications:** Carbamidomethyl (C) (apply to specified residues or termini only)**Ions Score:** 51**Expect:** 0.0006**Matches :** 21/90 fragment ions using 51 most intense peaks ([help](#))

| #  | b                  | b <sup>++</sup> | b*                 | b <sup>*++</sup> | b <sup>0</sup> | b <sup>0++</sup>  | Seq. | y                  | y <sup>++</sup>   | y*          | y <sup>*++</sup> | y <sup>0</sup> | y <sup>0++</sup> | #  |
|----|--------------------|-----------------|--------------------|------------------|----------------|-------------------|------|--------------------|-------------------|-------------|------------------|----------------|------------------|----|
| 1  | 164.070605         | 82.538940       |                    |                  |                |                   | Y    |                    |                   |             |                  |                |                  | 10 |
| 2  | <b>279.097548</b>  | 140.052412      |                    |                  | 261.086983     | 131.047130        | D    | <b>1042.589136</b> | 521.798206        | 1025.562587 | 513.284932       | 1024.578571    | 512.792924       | 9  |
| 3  | <b>392.181612</b>  | 196.594444      |                    |                  | 374.171047     | 187.589162        | I    | <b>927.562193</b>  | <b>464.284735</b> | 910.535644  | 455.771460       | 909.551628     | 455.279452       | 8  |
| 4  | <b>463.218726</b>  | 232.113001      |                    |                  | 445.208161     | 223.107719        | A    | <b>814.478129</b>  | 407.742703        | 797.451580  | 399.229428       | 796.467564     | 398.737420       | 7  |
| 5  | <b>576.302790</b>  | 288.655033      |                    |                  | 558.292225     | <b>279.649751</b> | L    | <b>743.441015</b>  | 372.224146        | 726.414466  | 363.710871       | 725.430450     | 363.218863       | 6  |
| 6  | <b>675.371204</b>  | 338.189240      |                    |                  | 657.360639     | 329.183958        | V    | <b>630.356951</b>  | 315.682114        | 613.330402  | 307.168839       | 612.346386     | 306.676831       | 5  |
| 7  | <b>803.429782</b>  | 402.218529      | <b>786.403233</b>  | 393.705255       | 785.419217     | 393.213247        | Q    | <b>531.288537</b>  | 266.147907        | 514.261988  | 257.634632       | 513.277972     | 257.142624       | 4  |
| 8  | <b>932.472375</b>  | 466.739826      | 915.445826         | 458.226551       | 914.461810     | 457.734543        | E    | <b>403.229959</b>  | 202.118618        | 386.203410  | 193.605343       | 385.219394     | 193.113335       | 3  |
| 9  | <b>1031.540789</b> | 516.274033      | <b>1014.514240</b> | 507.760758       | 1013.530224    | 507.268750        | V    | <b>274.187366</b>  | 137.597321        | 257.160817  | 129.084047       |                |                  | 2  |
| 10 |                    |                 |                    |                  |                |                   | R    | <b>175.118952</b>  | 88.063114         | 158.092403  | 79.549839        |                |                  | 1  |

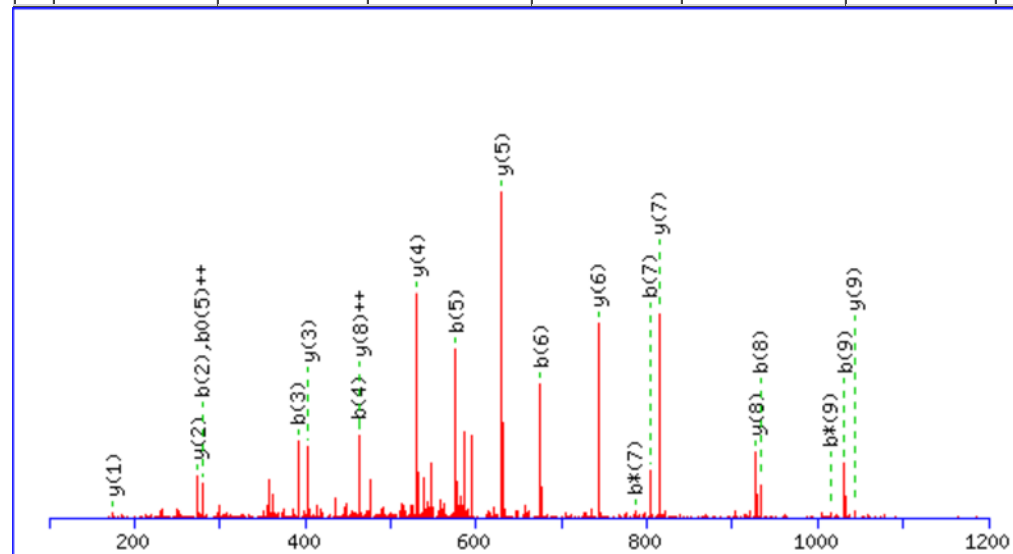

## Peptide View

MS/MS Fragmentation of **EVQLVESGGGLVKGSLR**Found in **IPI00783024**, Tax\_Id=9606 Gene\_Symbol=- Myosin-reactive immunoglobulin heavy chain variable region (Fragment)**Experiment:** 13 - S\_E-1 **Fraction:** S\_E-1

Match to Query 13042: 1881.032048 from(941.523300,2+)

Title: OECHL100310\_41.13600.13600.2.dta

Data file \\BOROMIR\Masse\Data LTQ-Orbitrap\Chrystelle Lacroix\Etude clinique sJPU\OECHL100310\_41.raw

**Monoisotopic mass of neutral peptide Mr(calc):** 1881.031982**Fixed modifications:** Carbamidomethyl (C) (apply to specified residues or termini only)**Ions Score:** 83**Expect:** 2.6e-007**Matches :** 15/208 fragment ions using 16 most intense peaks ([help](#))

| #  | b           | b <sup>++</sup> | b*          | b <sup>*++</sup> | b <sup>0</sup> | b <sup>0++</sup> | Seq. | y           | y <sup>++</sup> | y*          | y <sup>*++</sup> | y <sup>0</sup> | y <sup>0++</sup> | #  |
|----|-------------|-----------------|-------------|------------------|----------------|------------------|------|-------------|-----------------|-------------|------------------|----------------|------------------|----|
| 1  | 130.049869  | 65.528572       |             |                  | 112.039304     | 56.523290        | E    |             |                 |             |                  |                |                  | 19 |
| 2  | 229.118283  | 115.062780      |             |                  | 211.107718     | 106.057497       | V    | 1752.996660 | 877.001968      | 1735.970111 | 868.488694       | 1734.986095    | 867.996686       | 18 |
| 3  | 357.176861  | 179.092069      | 340.150312  | 170.578794       | 339.166296     | 170.086786       | Q    | 1653.928246 | 827.467761      | 1636.901697 | 818.954487       | 1635.917681    | 818.462479       | 17 |
| 4  | 470.260925  | 235.634101      | 453.234376  | 227.120826       | 452.250360     | 226.628818       | L    | 1525.869668 | 763.438472      | 1508.843119 | 754.925198       | 1507.859103    | 754.433190       | 16 |
| 5  | 569.329339  | 285.168308      | 552.302790  | 276.655033       | 551.318774     | 276.163025       | V    | 1412.785604 | 706.896440      | 1395.759055 | 698.383166       | 1394.775039    | 697.891158       | 15 |
| 6  | 698.371932  | 349.689604      | 681.345383  | 341.176330       | 680.361367     | 340.684322       | E    | 1313.717190 | 657.362233      | 1296.690641 | 648.848959       | 1295.706625    | 648.356951       | 14 |
| 7  | 785.403960  | 393.205618      | 768.377411  | 384.692344       | 767.393395     | 384.200336       | S    | 1184.674597 | 592.840937      | 1167.648048 | 584.327662       | 1166.664032    | 583.835654       | 13 |
| 8  | 842.425424  | 421.716350      | 825.398875  | 413.203076       | 824.414859     | 412.711068       | G    | 1097.642569 | 549.324923      | 1080.616020 | 540.811648       | 1079.632004    | 540.319640       | 12 |
| 9  | 899.446888  | 450.227082      | 882.420339  | 441.713808       | 881.436323     | 441.221800       | G    | 1040.621105 | 520.814191      | 1023.594556 | 512.300916       | 1022.610540    | 511.808908       | 11 |
| 10 | 956.468352  | 478.737814      | 939.441803  | 470.224540       | 938.457787     | 469.732532       | G    | 983.599641  | 492.303459      | 966.573092  | 483.790184       | 965.589076     | 483.298176       | 10 |
| 11 | 1069.552416 | 535.279846      | 1052.525867 | 526.766572       | 1051.541851    | 526.274564       | L    | 926.578177  | 463.792727      | 909.551628  | 455.279452       | 908.567612     | 454.787444       | 9  |
| 12 | 1168.620830 | 584.814053      | 1151.594281 | 576.300779       | 1150.610265    | 575.808771       | V    | 813.494113  | 407.250695      | 796.467564  | 398.737420       | 795.483548     | 398.245412       | 8  |
| 13 | 1296.715793 | 648.861535      | 1279.689244 | 640.348260       | 1278.705228    | 639.856252       | K    | 714.425699  | 357.716487      | 697.399150  | 349.203213       | 696.415134     | 348.711205       | 7  |
| 14 | 1393.768557 | 697.387917      | 1376.742008 | 688.874642       | 1375.757992    | 688.382634       | P    | 586.330736  | 293.669006      | 569.304187  | 285.155731       | 568.320171     | 284.663723       | 6  |
| 15 | 1450.790021 | 725.898649      | 1433.763472 | 717.385374       | 1432.779456    | 716.893366       | G    | 489.277972  | 245.142624      | 472.251423  | 236.629349       | 471.267407     | 236.137341       | 5  |
| 16 | 1507.811485 | 754.409381      | 1490.784936 | 745.896106       | 1489.800920    | 745.404098       | G    | 432.256508  | 216.631892      | 415.229959  | 208.118617       | 414.245943     | 207.626609       | 4  |
| 17 | 1594.843513 | 797.925395      | 1577.816964 | 789.412120       | 1576.832948    | 788.920112       | S    | 375.235044  | 188.121160      | 358.208495  | 179.607885       | 357.224479     | 179.115877       | 3  |
| 18 | 1707.927577 | 854.467427      | 1690.901028 | 845.954152       | 1689.917012    | 845.462144       | L    | 288.203016  | 144.605146      | 271.176467  | 136.091871       |                |                  | 2  |
| 19 |             |                 |             |                  |                |                  | R    | 175.118952  | 88.063114       | 158.092403  | 79.549839        |                |                  | 1  |

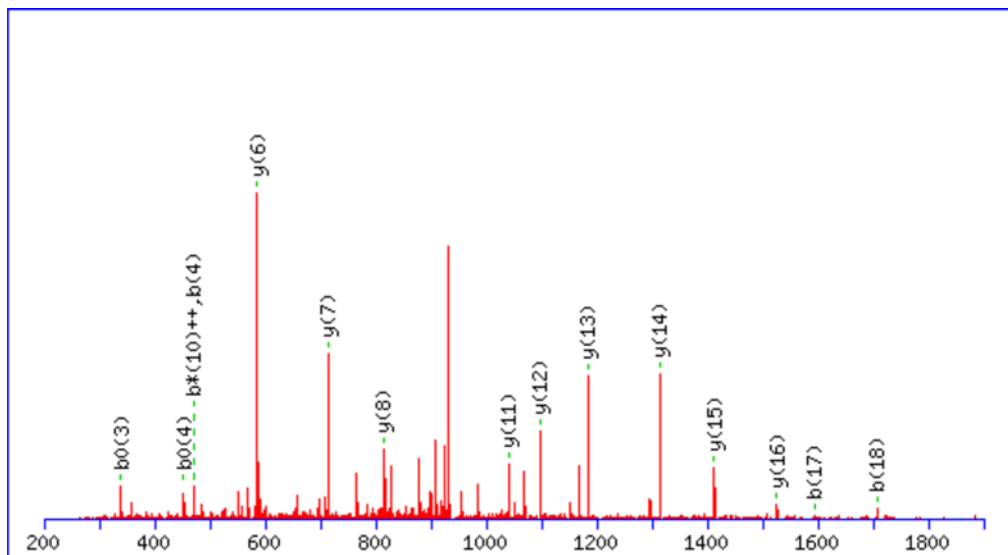

## Peptide View

MS/MS Fragmentation of **AADDTWEPFASGK**

Found in **IPI00022432**, Tax\_Id=9606 Gene\_Symbol=TTR Transthyretin

**Experiment:** 13 - S\_E-1 **Fraction:** S\_E-1

Match to Query 8714: 1393.616048 from(697.815300,2+)

Title: OECHL100310\_41.15146.15146.2.dta

Data file \\BOROMIR\Masse\Data LTQ-Orbitrap\Chrystelle Lacroix\Etude clinique sJPU\OECHL100310\_41.raw

**Monoisotopic mass of neutral peptide Mr(calc):** 1393.615005 **Fixed modifications:** Carbamidomethyl (C) (apply to specified residues or termini only) **Ions Score:** 64

**Expect:** 2.5e-005 **Matches :** 21/112 fragment ions using 36 most intense peaks ([help](#))

| # | b                 | b <sup>++</sup> | b <sup>0</sup>    | b <sup>0++</sup> | Seq. | y                  | y <sup>++</sup> | y <sup>*</sup> | y <sup>*++</sup> | y <sup>0</sup> | y <sup>0++</sup> | #  |
|---|-------------------|-----------------|-------------------|------------------|------|--------------------|-----------------|----------------|------------------|----------------|------------------|----|
| 1 | 72.044390         | 36.525833       |                   |                  | A    |                    |                 |                |                  |                |                  | 13 |
| 2 | 143.081504        | 72.044390       |                   |                  | A    | 1323.585173        | 662.296225      | 1306.558624    | 653.782950       | 1305.574608    | 653.290942       | 12 |
| 3 | <b>258.108447</b> | 129.557862      | 240.097882        | 120.552579       | D    | <b>1252.548059</b> | 626.777668      | 1235.521510    | 618.264393       | 1234.537494    | 617.772385       | 11 |
| 4 | <b>373.135390</b> | 187.071333      | 355.124825        | 178.066051       | D    | 1137.521116        | 569.264196      | 1120.494567    | 560.750922       | 1119.510551    | 560.258914       | 10 |
| 5 | <b>474.183069</b> | 237.595173      | <b>456.172504</b> | 228.589890       | T    | <b>1022.494173</b> | 511.750725      | 1005.467624    | 503.237450       | 1004.483608    | 502.745442       | 9  |
| 6 | <b>660.262382</b> | 330.634829      | 642.251817        | 321.629547       | W    | <b>921.446494</b>  | 461.226885      | 904.419945     | 452.713611       | 903.435929     | 452.221603       | 8  |

|    |                    |            |                   |            |          |                   |            |                   |            |                   |            |          |
|----|--------------------|------------|-------------------|------------|----------|-------------------|------------|-------------------|------------|-------------------|------------|----------|
| 7  | <b>789.304975</b>  | 395.156126 | <b>771.294410</b> | 386.150843 | <b>E</b> | <b>735.367181</b> | 368.187229 | 718.340632        | 359.673954 | 717.356616        | 359.181946 | <b>7</b> |
| 8  | 886.357739         | 443.682508 | 868.347174        | 434.677225 | <b>P</b> | <b>606.324588</b> | 303.665932 | <b>589.298039</b> | 295.152658 | <b>588.314023</b> | 294.660650 | <b>6</b> |
| 9  | <b>1033.426153</b> | 517.216715 | 1015.415588       | 508.211432 | <b>F</b> | 509.271824        | 255.139550 | 492.245275        | 246.626275 | 491.261259        | 246.134267 | <b>5</b> |
| 10 | <b>1104.463267</b> | 552.735272 | 1086.452702       | 543.729989 | <b>A</b> | <b>362.203410</b> | 181.605343 | 345.176861        | 173.092068 | 344.192845        | 172.600060 | <b>4</b> |
| 11 | <b>1191.495295</b> | 596.251286 | 1173.484730       | 587.246003 | <b>S</b> | <b>291.166296</b> | 146.086786 | 274.139747        | 137.573512 | 273.155731        | 137.081504 | <b>3</b> |
| 12 | <b>1248.516759</b> | 624.762018 | 1230.506194       | 615.756735 | <b>G</b> | <b>204.134268</b> | 102.570772 | 187.107719        | 94.057497  |                   |            | <b>2</b> |
| 13 |                    |            |                   |            | <b>K</b> | 147.112804        | 74.060040  | 130.086255        | 65.546765  |                   |            | <b>1</b> |

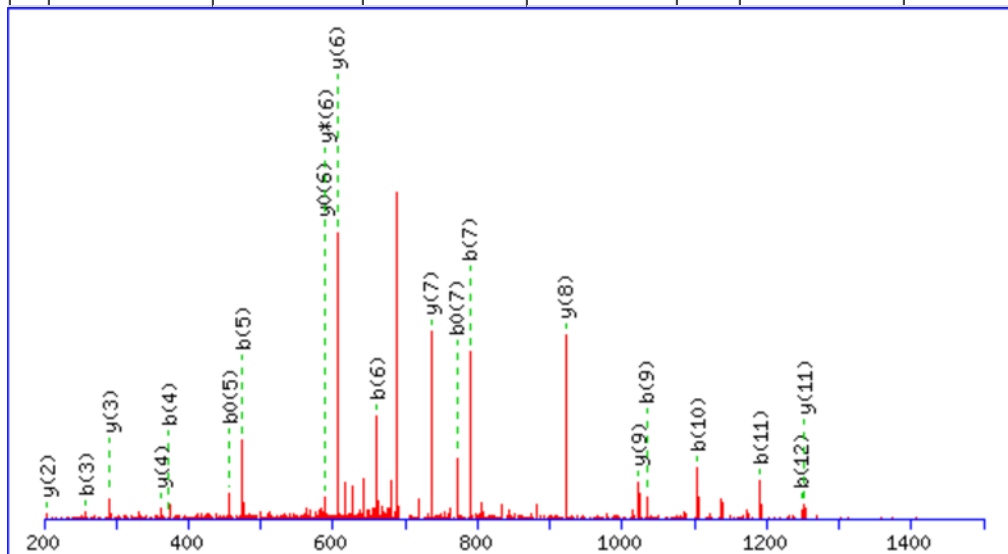

## Peptide View

MS/MS Fragmentation of **TVAGPVGGSLSVQCPYEKEHR**

Found in **IPI00414784**, Tax\_Id=9606 Gene\_Symbol=CD300A Isoform 1 of CMRF35-like molecule 8

**Experiment:** 13 - S\_E-1 **Fraction:** S\_E-1

Match to Query 14814: 2270.113448 from(1136.064000,2+)

Title: OECHL100310\_41.10579.10579.2.dta

Data file \\BOROMIR\Masse\Data LTQ-Orbitrap\Chrystelle Lacroix\Etude clinique sJPU\OECHL100310\_41.raw

**Monoisotopic mass of neutral peptide Mr(calc):** 2270.111374 **Fixed modifications:** Carbamidomethyl (C) (apply to specified residues or termini only) **Ions Score:** 78

**Expect:** 2.8e-006 **Matches :** 21/212 fragment ions using 34 most intense peaks ([help](#))

| #  | <b>b</b>           | <b>b<sup>++</sup></b> | <b>b*</b>   | <b>b<sup>*++</sup></b> | <b>b<sup>0</sup></b> | <b>b<sup>0++</sup></b> | Seq.     | <b>y</b>           | <b>y<sup>++</sup></b> | <b>y*</b>   | <b>y<sup>*++</sup></b> | <b>y<sup>0</sup></b> | <b>y<sup>0++</sup></b> |
|----|--------------------|-----------------------|-------------|------------------------|----------------------|------------------------|----------|--------------------|-----------------------|-------------|------------------------|----------------------|------------------------|
| 1  | 102.054955         | 51.531116             |             |                        | 84.044390            | 42.525833              | <b>T</b> |                    |                       |             |                        |                      |                        |
| 2  | 201.123369         | 101.065322            |             |                        | 183.112804           | 92.060040              | <b>V</b> | 2170.070965        | 1085.539120           | 2153.044416 | 1077.025846            | 2152.060400          | 1076.5338              |
| 3  | 272.160483         | 136.583879            |             |                        | 254.149918           | 127.578597             | <b>A</b> | 2071.002551        | <b>1036.004913</b>    | 2053.976002 | 1027.491639            | 2052.991986          | 1026.9996              |
| 4  | 329.181947         | 165.094611            |             |                        | 311.171382           | 156.089329             | <b>G</b> | 1999.965437        | <b>1000.486357</b>    | 1982.938888 | 991.973082             | 1981.954872          | 991.4810               |
| 5  | 426.234711         | 213.620994            |             |                        | 408.224146           | 204.615711             | <b>P</b> | 1942.943973        | 971.975625            | 1925.917424 | 963.462350             | 1924.933408          | 962.9703               |
| 6  | 525.303125         | 263.155201            |             |                        | <b>507.292560</b>    | 254.149918             | <b>V</b> | <b>1845.891209</b> | 923.449243            | 1828.864660 | 914.935968             | 1827.880644          | 914.4439               |
| 7  | 582.324589         | 291.665933            |             |                        | 564.314024           | 282.660650             | <b>G</b> | <b>1746.822795</b> | <b>873.915036</b>     | 1729.796246 | 865.401761             | 1728.812230          | 864.9097               |
| 8  | <b>639.346053</b>  | 320.176665            |             |                        | 621.335488           | 311.171382             | <b>G</b> | <b>1689.801331</b> | 845.404304            | 1672.774782 | 836.891029             | 1671.790766          | 836.3990               |
| 9  | 726.378081         | 363.692679            |             |                        | 708.367516           | 354.687396             | <b>S</b> | 1632.779867        | 816.893572            | 1615.753318 | <b>808.380297</b>      | 1614.769302          | 807.8882               |
| 10 | 839.462145         | <b>420.234711</b>     |             |                        | 821.451580           | 411.229428             | <b>L</b> | <b>1545.747839</b> | 773.377558            | 1528.721290 | 764.864283             | 1527.737274          | 764.3722               |
| 11 | 926.494173         | 463.750725            |             |                        | 908.483608           | 454.745442             | <b>S</b> | <b>1432.663775</b> | 716.835526            | 1415.637226 | 708.322251             | 1414.653210          | 707.8302               |
| 12 | 1025.562587        | 513.284932            |             |                        | 1007.552022          | 504.279649             | <b>V</b> | <b>1345.631747</b> | 673.319512            | 1328.605198 | 664.806237             | 1327.621182          | 664.3142               |
| 13 | 1153.621165        | 577.314221            | 1136.594616 | <b>568.800946</b>      | 1135.610600          | 568.308938             | <b>Q</b> | <b>1246.563333</b> | 623.785305            | 1229.536784 | 615.272030             | 1228.552768          | 614.7800               |
| 14 | 1313.651814        | 657.329545            | 1296.625265 | 648.816271             | 1295.641249          | 648.324263             | <b>C</b> | <b>1118.504755</b> | 559.756016            | 1101.478206 | 551.242741             | 1100.494190          | 550.7507               |
| 15 | 1410.704578        | 705.855927            | 1393.678029 | 697.342653             | 1392.694013          | 696.850645             | <b>P</b> | <b>958.474106</b>  | 479.740691            | 941.447557  | 471.227417             | 940.463541           | 470.7354               |
| 16 | 1573.767907        | 787.387592            | 1556.741358 | 778.874317             | 1555.757342          | 778.382309             | <b>Y</b> | 861.421342         | 431.214309            | 844.394793  | 422.701035             | 843.410777           | 422.2090               |
| 17 | 1702.810500        | 851.908888            | 1685.783951 | 843.395614             | 1684.799935          | 842.903606             | <b>E</b> | <b>698.358013</b>  | 349.682645            | 681.331464  | 341.169370             | 680.347448           | 340.6773               |
| 18 | 1830.905463        | 915.956370            | 1813.878914 | 907.443095             | 1812.894898          | 906.951087             | <b>K</b> | <b>569.315420</b>  | 285.161348            | 552.288871  | 276.648074             | 551.304855           | 276.1560               |
| 19 | <b>1959.948056</b> | 980.477666            | 1942.921507 | 971.964392             | 1941.937491          | 971.472384             | <b>E</b> | <b>441.220457</b>  | 221.113867            | 424.193908  | 212.600592             | 423.209892           | 212.1085               |
| 20 | 2097.006968        | 1049.007122           | 2079.980419 | 1040.493847            | 2078.996403          | 1040.001840            | <b>H</b> | 312.177864         | 156.592570            | 295.151315  | 148.079295             |                      |                        |
| 21 |                    |                       |             |                        |                      |                        | <b>R</b> | 175.118952         | 88.063114             | 158.092403  | 79.549839              |                      |                        |

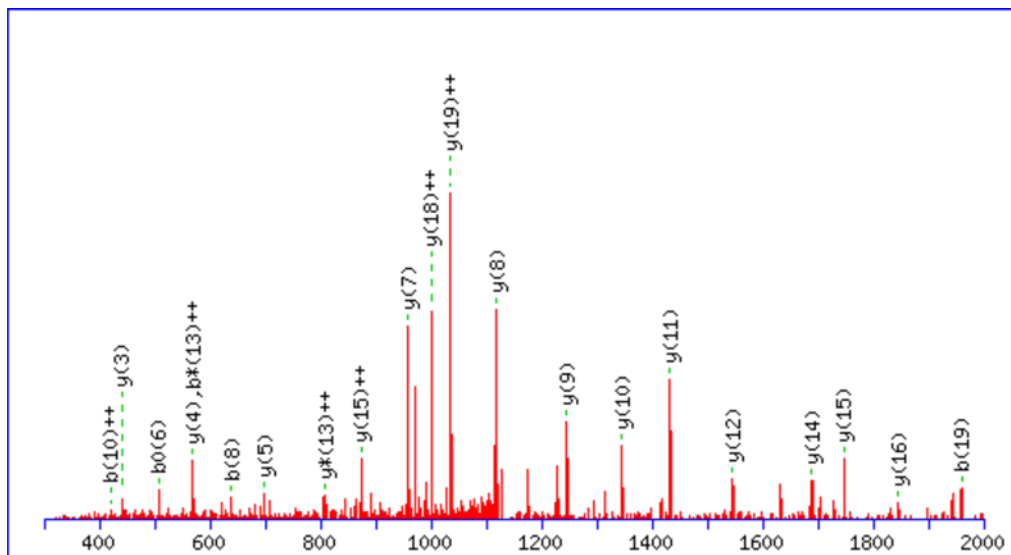

## Peptide View

MS/MS Fragmentation of **KAGPCEQAGSPCR**

Found in **IPI00028381**, Tax\_Id=9606 Gene\_Symbol=DLK2 Isoform 1 of Protein delta homolog 2

**Experiment:** 13 - S\_E-1 **Fraction:** S\_E-1

Match to Query 8909: 1416.624248 from(709.319400,2+)

Title: OECHL100310\_41.1923.1923.2.dta

Data file \\BOROMIR\Masse\Data LTQ-Orbitrap\Chrystelle Lacroix\Etude clinique sJPU\OECHL100310\_41.raw

**Monoisotopic mass of neutral peptide Mr(calc):** 1416.623810 **Fixed modifications:** Carbamidomethyl (C) (apply to specified residues or termini only) **Ions Score:** 86

**Expect:** 1.5e-007 **Matches :** 16/128 fragment ions using 24 most intense peaks ([help](#))

| # | b          | b <sup>++</sup> | b <sup>*</sup> | b <sup>*++</sup> | b <sup>0</sup> | b <sup>0++</sup> | Seq.     | y                  | y <sup>++</sup>   | y <sup>*</sup> | y <sup>*++</sup> | y <sup>0</sup> | y <sup>0++</sup> | #         |
|---|------------|-----------------|----------------|------------------|----------------|------------------|----------|--------------------|-------------------|----------------|------------------|----------------|------------------|-----------|
| 1 | 129.102239 | 65.054757       | 112.075690     | 56.541483        |                |                  | <b>K</b> |                    |                   |                |                  |                |                  | <b>13</b> |
| 2 | 200.139353 | 100.573315      | 183.112804     | 92.060040        |                |                  | <b>A</b> | <b>1289.536133</b> | <b>645.271705</b> | 1272.509584    | 636.758430       | 1271.525568    | 636.266422       | <b>12</b> |
| 3 | 257.160817 | 129.084047      | 240.134268     | 120.570772       |                |                  | <b>G</b> | <b>1218.499019</b> | 609.753148        | 1201.472470    | 601.239873       | 1200.488454    | 600.747865       | <b>11</b> |
| 4 | 354.213581 | 177.610429      | 337.187032     | 169.097154       |                |                  | <b>P</b> | <b>1161.477555</b> | <b>581.242416</b> | 1144.451006    | 572.729141       | 1143.466990    | 572.237133       | <b>10</b> |
| 5 | 514.244230 | 257.625753      | 497.217681     | 249.112479       |                |                  | <b>C</b> | <b>1064.424791</b> | 532.716034        | 1047.398242    | 524.202759       | 1046.414226    | 523.710751       | <b>9</b>  |
| 6 | 643.286823 | 322.147050      | 626.260274     | 313.633775       | 625.276258     | 313.141767       | <b>E</b> | <b>904.394142</b>  | 452.700709        | 887.367593     | 444.187434       | 886.383577     | 443.695427       | <b>8</b>  |



|    |             |            |             |            |             |            |   |            |            |            |            |            |            |   |
|----|-------------|------------|-------------|------------|-------------|------------|---|------------|------------|------------|------------|------------|------------|---|
| 7  | 771.345401  | 386.176339 | 754.318852  | 377.663064 | 753.334836  | 377.171056 | Q | 775.351549 | 388.179413 | 758.325000 | 379.666138 | 757.340984 | 379.174130 | 7 |
| 8  | 842.382515  | 421.694896 | 825.355966  | 413.181621 | 824.371950  | 412.689613 | A | 647.292971 | 324.150124 | 630.266422 | 315.636849 | 629.282406 | 315.144841 | 6 |
| 9  | 899.403979  | 450.205628 | 882.377430  | 441.692353 | 881.393414  | 441.200345 | G | 576.255857 | 288.631567 | 559.229308 | 280.118292 | 558.245292 | 279.626284 | 5 |
| 10 | 986.436007  | 493.721642 | 969.409458  | 485.208367 | 968.425442  | 484.716359 | S | 519.234393 | 260.120835 | 502.207844 | 251.607560 | 501.223828 | 251.115552 | 4 |
| 11 | 1083.488771 | 542.248024 | 1066.462222 | 533.734749 | 1065.478206 | 533.242741 | P | 432.202365 | 216.604820 | 415.175816 | 208.091546 |            |            | 3 |
| 12 | 1243.519420 | 622.263348 | 1226.492871 | 613.750074 | 1225.508855 | 613.258066 | C | 335.149601 | 168.078438 | 318.123052 | 159.565164 |            |            | 2 |
| 13 |             |            |             |            |             |            | R | 175.118952 | 88.063114  | 158.092403 | 79.549839  |            |            | 1 |

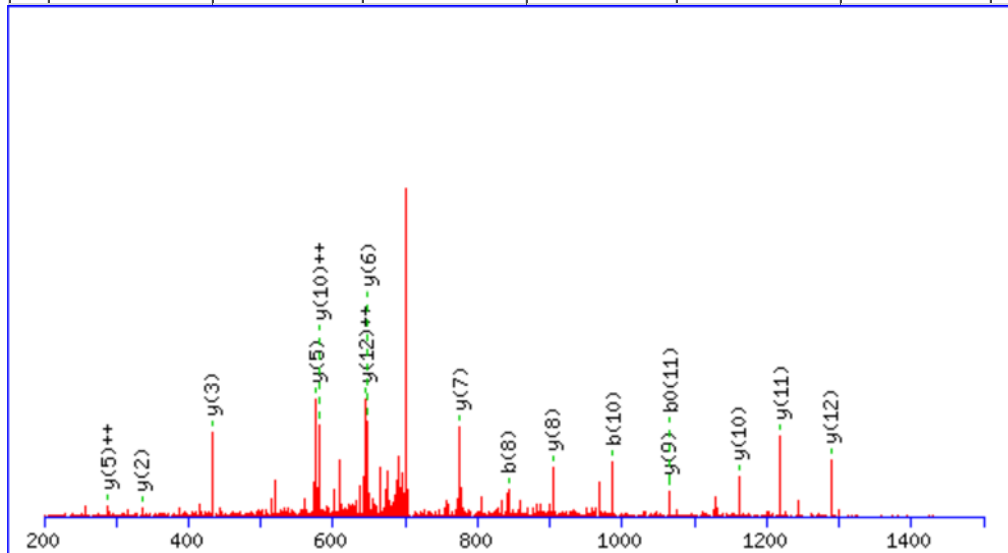

## Peptide View

MS/MS Fragmentation of **HSFKGEECPAGSHR**

Found in **IPI00021970**, Tax\_Id=9606 Gene\_Symbol=MGC31957;TNFRSF10C TNFRSF10C protein

Experiment: 13 - S\_E-1 Fraction: S\_E-1

Match to Query 10755: 1597.707648 from(799.861100,2+)

Title: OECHL100310\_41.2182.2182.2.dta

Data file \\BOROMIR\Masse\Data LTQ-Orbitrap\Chrystelle Lacroix\Etude clinique sJPU\OECHL100310\_41.raw

**Monoisotopic mass of neutral peptide Mr(calc):** 1597.705566**Fixed modifications:** Carbamidomethyl (C) (apply to specified residues or termini only)**Ions Score:** 62

**Expect:** 4.7e-005**Matches :** 33/144 fragment ions using 54 most intense peaks ([help](#))

| #  | b                  | b <sup>++</sup>   | b*          | b <sup>*++</sup>  | b <sup>0</sup>     | b <sup>0++</sup>  | Seq. | y                  | y <sup>++</sup>   | y*          | y <sup>*++</sup>  | y <sup>0</sup>     | y <sup>0++</sup>  | #  |
|----|--------------------|-------------------|-------------|-------------------|--------------------|-------------------|------|--------------------|-------------------|-------------|-------------------|--------------------|-------------------|----|
| 1  | 138.066188         | 69.536732         |             |                   |                    |                   | H    |                    |                   |             |                   |                    |                   | 14 |
| 2  | <b>225.098216</b>  | 113.052746        |             |                   | 207.087651         | 104.047463        | S    | <b>1461.653938</b> | <b>731.330607</b> | 1444.627389 | 722.817333        | <b>1443.643373</b> | <b>722.325325</b> | 13 |
| 3  | <b>372.166630</b>  | 186.586953        |             |                   | 354.156065         | 177.581671        | F    | <b>1374.621910</b> | <b>687.814593</b> | 1357.595361 | 679.301319        | 1356.611345        | 678.809311        | 12 |
| 4  | <b>500.261593</b>  | 250.634435        | 483.235044  | 242.121160        | <b>482.251028</b>  | 241.629152        | K    | <b>1227.553496</b> | <b>614.280386</b> | 1210.526947 | <b>605.767112</b> | 1209.542931        | <b>605.275104</b> | 11 |
| 5  | 557.283057         | <b>279.145167</b> | 540.256508  | 270.631892        | 539.272492         | 270.139884        | G    | <b>1099.458533</b> | 550.232905        | 1082.431984 | 541.719630        | 1081.447968        | 541.227622        | 10 |
| 6  | <b>686.325650</b>  | 343.666463        | 669.299101  | 335.153189        | 668.315085         | 334.661181        | E    | <b>1042.437069</b> | 521.722173        | 1025.410520 | 513.208898        | 1024.426504        | 512.716890        | 9  |
| 7  | 815.368243         | 408.187760        | 798.341694  | <b>399.674485</b> | 797.357678         | <b>399.182477</b> | E    | <b>913.394476</b>  | <b>457.200876</b> | 896.367927  | 448.687602        | <b>895.383911</b>  | 448.195594        | 8  |
| 8  | <b>975.398892</b>  | 488.203084        | 958.372343  | 479.689810        | 957.388327         | 479.197802        | C    | <b>784.351883</b>  | 392.679580        | 767.325334  | 384.166305        | 766.341318         | 383.674297        | 7  |
| 9  | 1072.451656        | 536.729466        | 1055.425107 | 528.216192        | 1054.441091        | 527.724184        | P    | <b>624.321234</b>  | 312.664255        | 607.294685  | 304.150981        | <b>606.310669</b>  | 303.658973        | 6  |
| 10 | <b>1143.488770</b> | 572.248023        | 1126.462221 | 563.734749        | 1125.478205        | 563.242741        | A    | 527.268470         | 264.137873        | 510.241921  | 255.624598        | 509.257905         | 255.132590        | 5  |
| 11 | <b>1200.510234</b> | 600.758755        | 1183.483685 | 592.245481        | 1182.499669        | 591.753473        | G    | <b>456.231356</b>  | 228.619316        | 439.204807  | 220.106041        | 438.220791         | 219.614033        | 4  |
| 12 | 1287.542262        | 644.274769        | 1270.515713 | 635.761495        | <b>1269.531697</b> | 635.269487        | S    | <b>399.209892</b>  | 200.108584        | 382.183343  | 191.595309        | 381.199327         | 191.103301        | 3  |
| 13 | <b>1424.601174</b> | 712.804225        | 1407.574625 | 704.290951        | 1406.590609        | 703.798943        | H    | 312.177864         | 156.592570        | 295.151315  | 148.079295        |                    |                   | 2  |
| 14 |                    |                   |             |                   |                    |                   | R    | 175.118952         | 88.063114         | 158.092403  | 79.549839         |                    |                   | 1  |

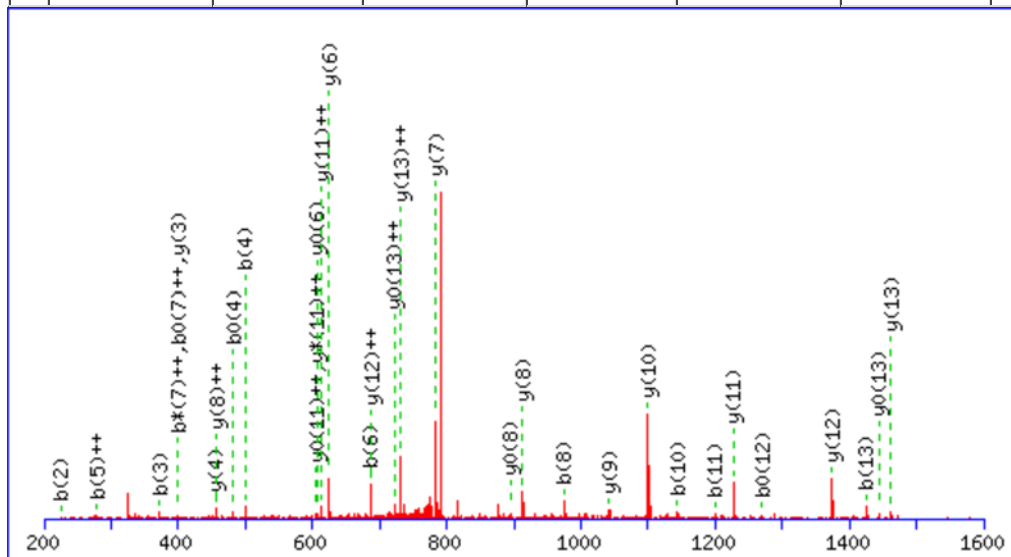

## Peptide View

MS/MS Fragmentation of **AHGQESAIFNEVAPGYFSR**Found in **IPI00170635**, Tax\_Id=9606 Gene\_Symbol=SECTM1 Secreted and transmembrane protein 1**Experiment:** 13 - S\_E-1 **Fraction:** S\_E-1

Match to Query 14028: 2078.983448 from(1040.499000,2+)

Title: OECHL100310\_41.16963.16963.2.dta

Data file \\BOROMIR\Masse\Data LTQ-Orbitrap\Chrystelle Lacroix\Etude clinique sJPU\OECHL100310\_41.raw

**Monoisotopic mass of neutral peptide Mr(calc):** 2078.980988**Fixed modifications:** Carbamidomethyl (C) (apply to specified residues or termini only)**Ions Score:** 71**Expect:** 1.2e-005**Matches :** 30/200 fragment ions using 51 most intense peaks ([help](#))

| #  | b           | b <sup>++</sup> | b*          | b <sup>*++</sup> | b <sup>0</sup> | b <sup>0++</sup> | Seq. | y           | y <sup>++</sup> | y*          | y <sup>*++</sup> | y <sup>0</sup> | y <sup>0++</sup> | #  |
|----|-------------|-----------------|-------------|------------------|----------------|------------------|------|-------------|-----------------|-------------|------------------|----------------|------------------|----|
| 1  | 72.044390   | 36.525833       |             |                  |                |                  | A    |             |                 |             |                  |                |                  | 19 |
| 2  | 209.103302  | 105.055289      |             |                  |                |                  | H    | 2008.951166 | 1004.979221     | 1991.924617 | 996.465947       | 1990.940601    | 995.973939       | 18 |
| 3  | 266.124766  | 133.566021      |             |                  |                |                  | G    | 1871.892254 | 936.449765      | 1854.865705 | 927.936491       | 1853.881689    | 927.444483       | 17 |
| 4  | 394.183344  | 197.595310      | 377.156795  | 189.082035       |                |                  | Q    | 1814.870790 | 907.939033      | 1797.844241 | 899.425759       | 1796.860225    | 898.933751       | 16 |
| 5  | 523.225937  | 262.116607      | 506.199388  | 253.603332       | 505.215372     | 253.111324       | E    | 1686.812212 | 843.909744      | 1669.785663 | 835.396470       | 1668.801647    | 834.904462       | 15 |
| 6  | 610.257965  | 305.632621      | 593.231416  | 297.119346       | 592.247400     | 296.627338       | S    | 1557.769619 | 779.388448      | 1540.743070 | 770.875173       | 1539.759054    | 770.383165       | 14 |
| 7  | 681.295079  | 341.151178      | 664.268530  | 332.637903       | 663.284514     | 332.145895       | A    | 1470.737591 | 735.872434      | 1453.711042 | 727.359159       | 1452.727026    | 726.867151       | 13 |
| 8  | 794.379143  | 397.693210      | 777.352594  | 389.179935       | 776.368578     | 388.687927       | I    | 1399.700477 | 700.353877      | 1382.673928 | 691.840602       | 1381.689912    | 691.348594       | 12 |
| 9  | 941.447557  | 471.227417      | 924.421008  | 462.714142       | 923.436992     | 462.222134       | F    | 1286.616413 | 643.811845      | 1269.589864 | 635.298570       | 1268.605848    | 634.806562       | 11 |
| 10 | 1055.490484 | 528.248880      | 1038.463935 | 519.735606       | 1037.479919    | 519.243597       | N    | 1139.547999 | 570.277638      | 1122.521450 | 561.764363       | 1121.537434    | 561.272355       | 10 |
| 11 | 1184.533077 | 592.770176      | 1167.506528 | 584.256902       | 1166.522512    | 583.764894       | E    | 1025.505072 | 513.256174      | 1008.478523 | 504.742900       | 1007.494507    | 504.250892       | 9  |
| 12 | 1283.601491 | 642.304383      | 1266.574942 | 633.791109       | 1265.590926    | 633.299101       | V    | 896.462479  | 448.734878      | 879.435930  | 440.221603       | 878.451914     | 439.729595       | 8  |
| 13 | 1354.638605 | 677.822940      | 1337.612056 | 669.309666       | 1336.628040    | 668.817658       | A    | 797.394065  | 399.200671      | 780.367516  | 390.687396       | 779.383500     | 390.195388       | 7  |
| 14 | 1451.691369 | 726.349322      | 1434.664820 | 717.836048       | 1433.680804    | 717.344040       | P    | 726.356951  | 363.682114      | 709.330402  | 355.168839       | 708.346386     | 354.676831       | 6  |
| 15 | 1508.712833 | 754.860054      | 1491.686284 | 746.346780       | 1490.702268    | 745.854772       | G    | 629.304187  | 315.155732      | 612.277638  | 306.642457       | 611.293622     | 306.150449       | 5  |
| 16 | 1671.776162 | 836.391719      | 1654.749613 | 827.878445       | 1653.765597    | 827.386436       | Y    | 572.282723  | 286.645000      | 555.256174  | 278.131725       | 554.272158     | 277.639717       | 4  |
| 17 | 1818.844576 | 909.925926      | 1801.818027 | 901.412652       | 1800.834011    | 900.920643       | F    | 409.219394  | 205.113335      | 392.192845  | 196.600061       | 391.208829     | 196.108053       | 3  |
| 18 | 1905.876604 | 953.441940      | 1888.850055 | 944.928666       | 1887.866039    | 944.436658       | S    | 262.150980  | 131.579128      | 245.124431  | 123.065854       | 244.140415     | 122.573846       | 2  |
| 19 |             |                 |             |                  |                |                  | R    | 175.118952  | 88.063114       | 158.092403  | 79.549840        |                |                  | 1  |

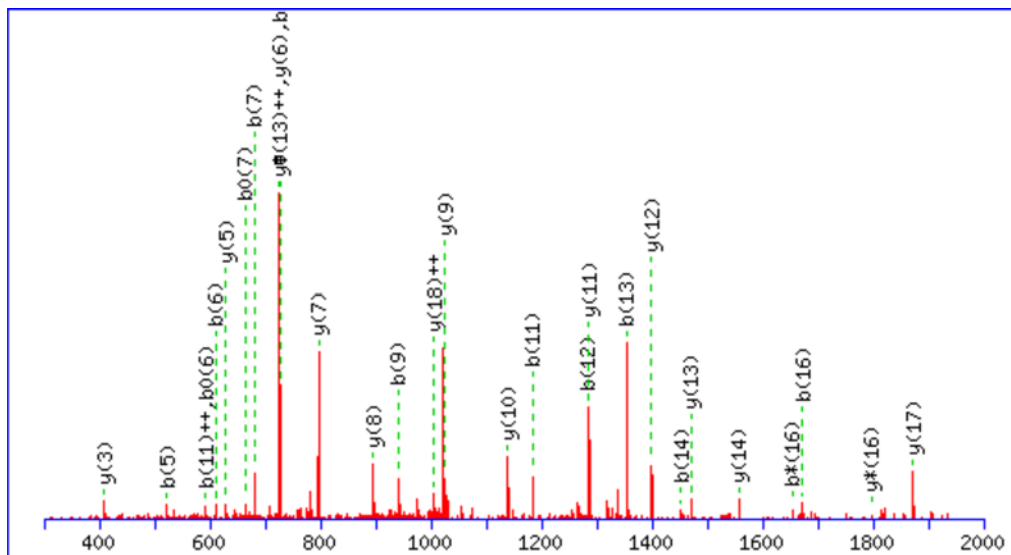

## Peptide View

MS/MS Fragmentation of **DFSLTSSSQTPGATK**

Found in **IPI00291300**, Tax\_Id=9606 Gene\_Symbol=PODXL2 Putative uncharacterized protein PODXL2

**Experiment:** 13 - S\_E-1 **Fraction:** S\_E-1

Match to Query 10031: 1525.728448 from(763.871500,2+)

Title: OECHL100310\_41.10895.10895.2.dta

Data file \\BOROMIR\Masse\Data LTQ-Orbitrap\Chrystelle Lacroix\Etude clinique sJPU\OECHL100310\_41.raw

**Monoisotopic mass of neutral peptide Mr(calc):** 1525.726028 **Fixed modifications:** Carbamidomethyl (C) (apply to specified residues or termini only) **Ions Score:** 69

**Expect:** 1.4e-005 **Matches :** 24/150 fragment ions using 39 most intense peaks ([help](#))

| # | b                 | b <sup>++</sup> | b* | b <sup>*++</sup> | b <sup>0</sup>    | b <sup>0++</sup> | Seq.     | y                  | y <sup>++</sup>   | y*          | y <sup>*++</sup>  | y <sup>0</sup> | y <sup>0++</sup>  | #         |
|---|-------------------|-----------------|----|------------------|-------------------|------------------|----------|--------------------|-------------------|-------------|-------------------|----------------|-------------------|-----------|
| 1 | 116.034219        | 58.520748       |    |                  | 98.023654         | 49.515465        | <b>D</b> |                    |                   |             |                   |                |                   | <b>15</b> |
| 2 | 263.102633        | 132.054954      |    |                  | 245.092068        | 123.049672       | <b>F</b> | 1411.706351        | 706.356813        | 1394.679802 | 697.843539        | 1393.695786    | 697.351531        | <b>14</b> |
| 3 | <b>350.134661</b> | 175.570968      |    |                  | <b>332.124096</b> | 166.565686       | <b>S</b> | <b>1264.637937</b> | <b>632.822607</b> | 1247.611388 | 624.309332        | 1246.627372    | 623.817324        | <b>13</b> |
| 4 | 463.218725        | 232.113001      |    |                  | <b>445.208160</b> | 223.107718       | <b>L</b> | <b>1177.605909</b> | 589.306592        | 1160.579360 | 580.793318        | 1159.595344    | 580.301310        | <b>12</b> |
| 5 | <b>564.266404</b> | 282.636840      |    |                  | <b>546.255839</b> | 273.631558       | <b>T</b> | <b>1064.521845</b> | 532.764561        | 1047.495296 | 524.251286        | 1046.511280    | 523.759278        | <b>11</b> |
| 6 | 651.298432        | 326.152854      |    |                  | 633.287867        | 317.147572       | <b>S</b> | <b>963.474166</b>  | 482.240721        | 946.447617  | <b>473.727446</b> | 945.463601     | <b>473.235438</b> | <b>10</b> |

|    |             |            |             |            |             |            |   |            |            |            |            |            |            |   |
|----|-------------|------------|-------------|------------|-------------|------------|---|------------|------------|------------|------------|------------|------------|---|
| 7  | 738.330460  | 369.668868 |             |            | 720.319895  | 360.663586 | S | 876.442138 | 438.724707 | 859.415589 | 430.211432 | 858.431573 | 429.719424 | 9 |
| 8  | 825.362488  | 413.184882 |             |            | 807.351923  | 404.179599 | S | 789.410110 | 395.208693 | 772.383561 | 386.695418 | 771.399545 | 386.203410 | 8 |
| 9  | 953.421066  | 477.214171 | 936.394517  | 468.700897 | 935.410501  | 468.208889 | Q | 702.378082 | 351.692679 | 685.351533 | 343.179404 | 684.367517 | 342.687396 | 7 |
| 10 | 1054.468745 | 527.738010 | 1037.442196 | 519.224736 | 1036.458180 | 518.732728 | T | 574.319504 | 287.663390 | 557.292955 | 279.150115 | 556.308939 | 278.658107 | 6 |
| 11 | 1151.521509 | 576.264392 | 1134.494960 | 567.751118 | 1133.510944 | 567.259110 | P | 473.271825 | 237.139550 | 456.245276 | 228.626276 | 455.261260 | 228.134268 | 5 |
| 12 | 1208.542973 | 604.775124 | 1191.516424 | 596.261850 | 1190.532408 | 595.769842 | G | 376.219061 | 188.613168 | 359.192512 | 180.099894 | 358.208496 | 179.607886 | 4 |
| 13 | 1279.580087 | 640.293681 | 1262.553538 | 631.780407 | 1261.569522 | 631.288399 | A | 319.197597 | 160.102436 | 302.171048 | 151.589162 | 301.187032 | 151.097154 | 3 |
| 14 | 1380.627766 | 690.817521 | 1363.601217 | 682.304246 | 1362.617201 | 681.812238 | T | 248.160483 | 124.583879 | 231.133934 | 116.070605 | 230.149918 | 115.578597 | 2 |
| 15 |             |            |             |            |             |            | K | 147.112804 | 74.060040  | 130.086255 | 65.546765  |            |            | 1 |

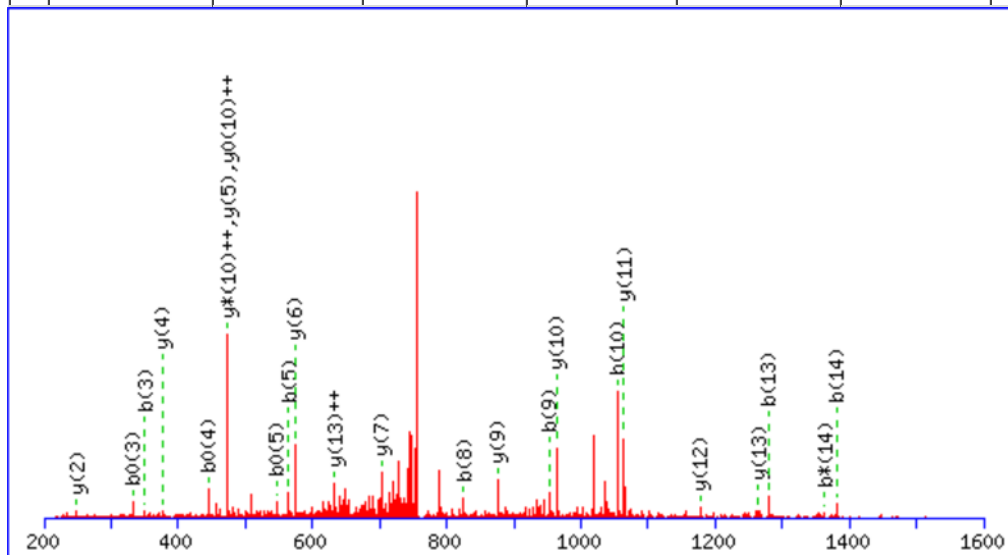

## Peptide View

MS/MS Fragmentation of **NIETIINTFHQYSVK**

Found in **IP100027462**, Tax\_Id=9606 Gene\_Symbol=S100A9 Protein S100-A9

**Experiment:** 13 - S\_E-1 **Fraction:** S\_E-1

Match to Query 12546: 1805.931848 from(903.973200,2+)

Title: OECHL100310\_41.18853.18853.2.dta

Data file \\BOROMIR\Masse\Data LTQ-Orbitrap\Chrystelle Lacroix\Etude clinique sJPU\OECHL100310\_41.raw

**Monoisotopic mass of neutral peptide Mr(calc):** 1805.931183**Fixed modifications:** Carbamidomethyl (C) (apply to specified residues or termini only)**Ions Score:** 72

**Expect:** 7.3e-006**Matches :** 17/160 fragment ions using 16 most intense peaks ([help](#))

| #  | b                  | b <sup>++</sup> | b*          | b <sup>*++</sup> | b <sup>0</sup>    | b <sup>0++</sup>  | Seq. | y                  | y <sup>++</sup>   | y*          | y <sup>*++</sup>  | y <sup>0</sup> | y <sup>0++</sup>  | #  |
|----|--------------------|-----------------|-------------|------------------|-------------------|-------------------|------|--------------------|-------------------|-------------|-------------------|----------------|-------------------|----|
| 1  | 115.050203         | 58.028740       | 98.023654   | 49.515465        |                   |                   | N    |                    |                   |             |                   |                |                   | 15 |
| 2  | 228.134267         | 114.570771      | 211.107718  | 106.057497       |                   |                   | I    | 1692.895549        | 846.951413        | 1675.869000 | 838.438138        | 1674.884984    | 837.946130        | 14 |
| 3  | 357.176860         | 179.092068      | 340.150311  | 170.578793       | 339.166295        | 170.086785        | E    | <b>1579.811485</b> | <b>790.409381</b> | 1562.784936 | 781.896106        | 1561.800920    | 781.404098        | 13 |
| 4  | 458.224539         | 229.615907      | 441.197990  | 221.102633       | <b>440.213974</b> | 220.610625        | T    | <b>1450.768892</b> | <b>725.888084</b> | 1433.742343 | 717.374810        | 1432.758327    | 716.882802        | 12 |
| 5  | 571.308603         | 286.157940      | 554.282054  | 277.644665       | <b>553.298038</b> | 277.152657        | I    | <b>1349.721213</b> | 675.364245        | 1332.694664 | 666.850970        | 1331.710648    | 666.358962        | 11 |
| 6  | 684.392667         | 342.699972      | 667.366118  | 334.186697       | 666.382102        | <b>333.694689</b> | I    | <b>1236.637149</b> | 618.822213        | 1219.610600 | 610.308938        | 1218.626584    | 609.816930        | 10 |
| 7  | 798.435594         | 399.721435      | 781.409045  | 391.208161       | 780.425029        | 390.716153        | N    | <b>1123.553085</b> | 562.280181        | 1106.526536 | <b>553.766906</b> | 1105.542520    | <b>553.274898</b> | 9  |
| 8  | 899.483273         | 450.245275      | 882.456724  | 441.732000       | 881.472708        | 441.239992        | T    | <b>1009.510158</b> | 505.258717        | 992.483609  | 496.745443        | 991.499593     | 496.253435        | 8  |
| 9  | 1046.551687        | 523.779482      | 1029.525138 | 515.266207       | 1028.541122       | 514.774199        | F    | 908.462479         | 454.734878        | 891.435930  | 446.221603        | 890.451914     | 445.729595        | 7  |
| 10 | 1183.610599        | 592.308938      | 1166.584050 | 583.795663       | 1165.600034       | 583.303655        | H    | 761.394065         | 381.200671        | 744.367516  | 372.687396        | 743.383500     | 372.195388        | 6  |
| 11 | 1311.669177        | 656.338227      | 1294.642628 | 647.824952       | 1293.658612       | 647.332944        | Q    | <b>624.335153</b>  | 312.671215        | 607.308604  | 304.157940        | 606.324588     | 303.665932        | 5  |
| 12 | <b>1474.732506</b> | 737.869891      | 1457.705957 | 729.356617       | 1456.721941       | 728.864609        | Y    | 496.276575         | 248.641926        | 479.250026  | 240.128651        | 478.266010     | 239.636643        | 4  |
| 13 | 1561.764534        | 781.385905      | 1544.737985 | 772.872631       | 1543.753969       | 772.380623        | S    | <b>333.213246</b>  | 167.110261        | 316.186697  | 158.596987        | 315.202681     | 158.104979        | 3  |
| 14 | <b>1660.832948</b> | 830.920112      | 1643.806399 | 822.406838       | 1642.822383       | 821.914830        | V    | 246.181218         | 123.594247        | 229.154669  | 115.080973        |                |                   | 2  |
| 15 |                    |                 |             |                  |                   |                   | K    | 147.112804         | 74.060040         | 130.086255  | 65.546765         |                |                   | 1  |

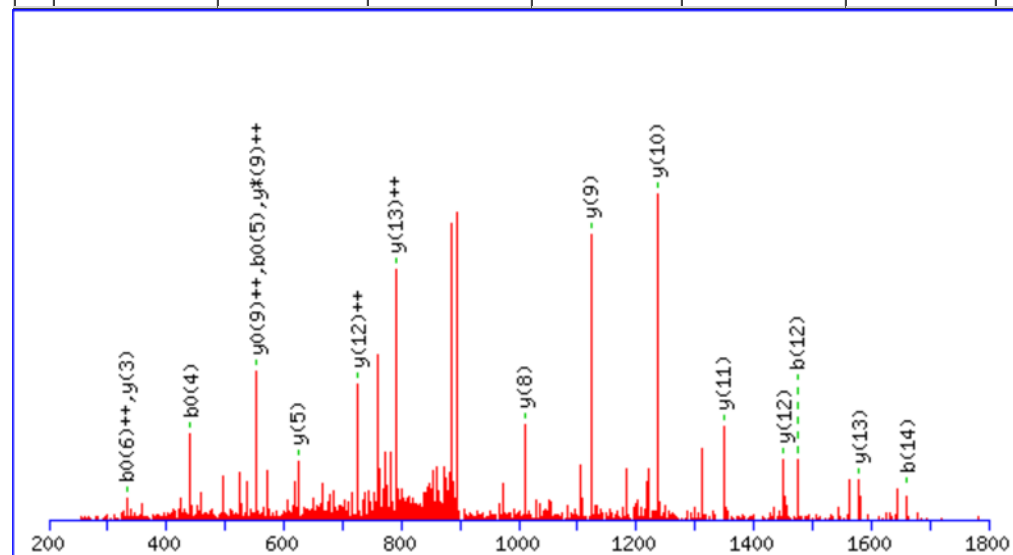

## Peptide View

MS/MS Fragmentation of **TGESAEFVCKR**

Found in **IPI00011264**, Tax\_Id=9606 Gene\_Symbol=CFHR1;LOC100293069 Complement factor H-related protein 1

**Experiment:** 13 - S\_E-1 **Fraction:** S\_E-1

Match to Query 7355: 1282.599248 from(642.306900,2+)

Title: OECHL100310\_41.5324.5324.2.dta

Data file \\BOROMIR\Masse\Data LTQ-Orbitrap\Chrystelle Lacroix\Etude clinique sJPU\OECHL100310\_41.raw

**Monoisotopic mass of neutral peptide Mr(calc):** 1282.597580**Fixed modifications:** Carbamidomethyl (C) (apply to specified residues or termini only)**Ions Score:** 50

**Expect:** 0.00071**Matches :** 9/92 fragment ions using 11 most intense peaks ([help](#))

| #  | b           | b <sup>++</sup> | b*          | b <sup>*++</sup> | b <sup>0</sup>    | b <sup>0++</sup> | Seq. | y                  | y <sup>++</sup>   | y*          | y <sup>*++</sup> | y <sup>0</sup> | y <sup>0++</sup> | #  |
|----|-------------|-----------------|-------------|------------------|-------------------|------------------|------|--------------------|-------------------|-------------|------------------|----------------|------------------|----|
| 1  | 102.054955  | 51.531116       |             |                  | 84.044390         | 42.525833        | T    |                    |                   |             |                  |                |                  | 11 |
| 2  | 159.076419  | 80.041847       |             |                  | 141.065854        | 71.036565        | G    | <b>1182.557184</b> | 591.782230        | 1165.530635 | 583.268956       | 1164.546619    | 582.776948       | 10 |
| 3  | 288.119012  | 144.563144      |             |                  | <b>270.108447</b> | 135.557862       | E    | <b>1125.535720</b> | 563.271498        | 1108.509171 | 554.758224       | 1107.525155    | 554.266216       | 9  |
| 4  | 375.151040  | 188.079158      |             |                  | 357.140475        | 179.073876       | S    | <b>996.493127</b>  | <b>498.750202</b> | 979.466578  | 490.236927       | 978.482562     | 489.744919       | 8  |
| 5  | 446.188154  | 223.597715      |             |                  | 428.177589        | 214.592433       | A    | <b>909.461099</b>  | 455.234188        | 892.434550  | 446.720913       | 891.450534     | 446.228905       | 7  |
| 6  | 575.230747  | 288.119012      |             |                  | 557.220182        | 279.113729       | E    | <b>838.423985</b>  | 419.715631        | 821.397436  | 411.202356       | 820.413420     | 410.710348       | 6  |
| 7  | 722.299161  | 361.653219      |             |                  | 704.288596        | 352.647936       | F    | <b>709.381392</b>  | 355.194334        | 692.354843  | 346.681060       |                |                  | 5  |
| 8  | 821.367575  | 411.187426      |             |                  | 803.357010        | 402.182143       | V    | 562.312978         | 281.660127        | 545.286429  | 273.146853       |                |                  | 4  |
| 9  | 981.398224  | 491.202750      |             |                  | 963.387659        | 482.197468       | C    | <b>463.244564</b>  | 232.125920        | 446.218015  | 223.612645       |                |                  | 3  |
| 10 | 1109.493187 | 555.250232      | 1092.466638 | 546.736957       | 1091.482622       | 546.244949       | K    | 303.213915         | 152.110595        | 286.187366  | 143.597321       |                |                  | 2  |
| 11 |             |                 |             |                  |                   |                  | R    | 175.118952         | 88.063114         | 158.092403  | 79.549839        |                |                  | 1  |

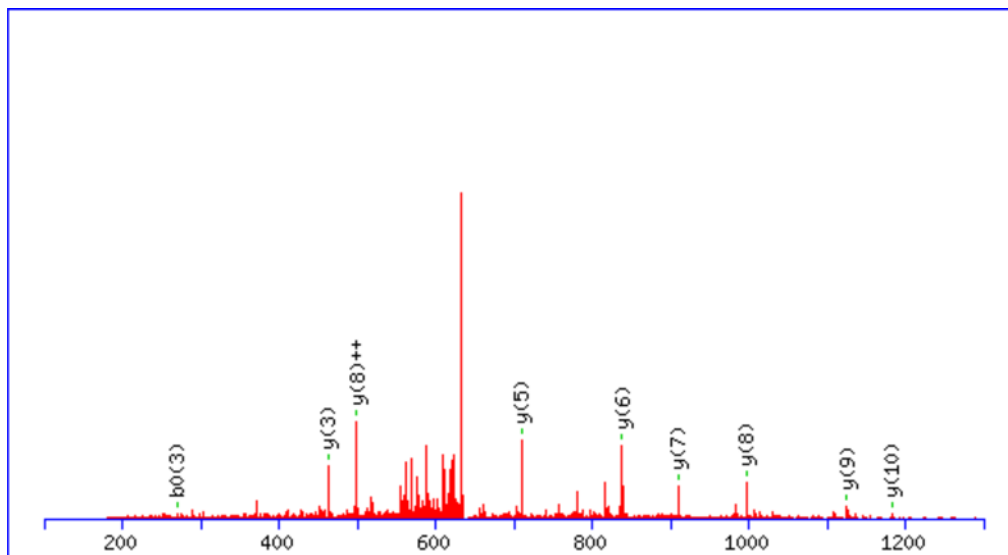

## Peptide View

MS/MS Fragmentation of **LLIYDASNLETGVPSR**

Found in **IPI00003111**, Tax\_Id=9606 Gene\_Symbol=LOC652694 Ig kappa chain V-I region AU

**Experiment:** 13 - S\_E-1 **Fraction:** S\_E-1

Match to Query 12120: 1746.916848 from(874.465700,2+)

Title: OECHL100310\_41.16869.16869.2.dta

Data file \\BOROMIR\Masse\Data LTQ-Orbitrap\Chrystelle Lacroix\Etude clinique sJPU\OECHL100310\_41.raw

**Monoisotopic mass of neutral peptide Mr(calc):** 1746.915192 **Fixed modifications:** Carbamidomethyl (C) (apply to specified residues or termini only) **Ions Score:** 82

**Expect:** 6.7e-007 **Matches :** 28/156 fragment ions using 43 most intense peaks ([help](#))

| # | b                 | b <sup>++</sup> | b* | b <sup>*++</sup> | b <sup>0</sup>    | b <sup>0++</sup> | Seq. | y                  | y <sup>++</sup> | y*          | y <sup>*++</sup> | y <sup>0</sup>     | y <sup>0++</sup> | #  |
|---|-------------------|-----------------|----|------------------|-------------------|------------------|------|--------------------|-----------------|-------------|------------------|--------------------|------------------|----|
| 1 | 114.091340        | 57.549308       |    |                  |                   |                  | L    |                    |                 |             |                  |                    |                  | 16 |
| 2 | 227.175404        | 114.091340      |    |                  |                   |                  | L    | 1634.838427        | 817.922852      | 1617.811878 | 809.409577       | 1616.827862        | 808.917569       | 15 |
| 3 | 340.259468        | 170.633372      |    |                  |                   |                  | I    | <b>1521.754363</b> | 761.380820      | 1504.727814 | 752.867545       | <b>1503.743798</b> | 752.375537       | 14 |
| 4 | 503.322797        | 252.165036      |    |                  |                   |                  | Y    | 1408.670299        | 704.838788      | 1391.643750 | 696.325513       | <b>1390.659734</b> | 695.833505       | 13 |
| 5 | 618.349740        | 309.678508      |    |                  | <b>600.339175</b> | 300.673226       | D    | <b>1245.606970</b> | 623.307123      | 1228.580421 | 614.793849       | 1227.596405        | 614.301841       | 12 |
| 6 | <b>689.386854</b> | 345.197065      |    |                  | 671.376289        | 336.191782       | A    | <b>1130.580027</b> | 565.793652      | 1113.553478 | 557.280377       | 1112.569462        | 556.788369       | 11 |



|    |             |            |             |            |             |            |   |             |            |             |            |             |            |    |
|----|-------------|------------|-------------|------------|-------------|------------|---|-------------|------------|-------------|------------|-------------|------------|----|
| 7  | 776.418882  | 388.713079 |             |            | 758.408317  | 379.707796 | S | 1059.542913 | 530.275095 | 1042.516364 | 521.761820 | 1041.532348 | 521.269812 | 10 |
| 8  | 890.461809  | 445.734542 | 873.435260  | 437.221268 | 872.451244  | 436.729260 | N | 972.510885  | 486.759081 | 955.484336  | 478.245806 | 954.500320  | 477.753798 | 9  |
| 9  | 1003.545873 | 502.276574 | 986.519324  | 493.763300 | 985.535308  | 493.271292 | L | 858.467958  | 429.737617 | 841.441409  | 421.224343 | 840.457393  | 420.732335 | 8  |
| 10 | 1132.588466 | 566.797871 | 1115.561917 | 558.284597 | 1114.577901 | 557.792588 | E | 745.383894  | 373.195585 | 728.357345  | 364.682311 | 727.373329  | 364.190303 | 7  |
| 11 | 1233.636145 | 617.321710 | 1216.609596 | 608.808436 | 1215.625580 | 608.316428 | T | 616.341301  | 308.674289 | 599.314752  | 300.161014 | 598.330736  | 299.669006 | 6  |
| 12 | 1290.657609 | 645.832442 | 1273.631060 | 637.319168 | 1272.647044 | 636.827160 | G | 515.293622  | 258.150449 | 498.267073  | 249.637175 | 497.283057  | 249.145167 | 5  |
| 13 | 1389.726023 | 695.366649 | 1372.699474 | 686.853375 | 1371.715458 | 686.361367 | V | 458.272158  | 229.639717 | 441.245609  | 221.126443 | 440.261593  | 220.634435 | 4  |
| 14 | 1486.778787 | 743.893032 | 1469.752238 | 735.379757 | 1468.768222 | 734.887749 | P | 359.203744  | 180.105510 | 342.177195  | 171.592236 | 341.193179  | 171.100228 | 3  |
| 15 | 1573.810815 | 787.409046 | 1556.784266 | 778.895771 | 1555.800250 | 778.403763 | S | 262.150980  | 131.579128 | 245.124431  | 123.065854 | 244.140415  | 122.573846 | 2  |
| 16 |             |            |             |            |             |            | R | 175.118952  | 88.063114  | 158.092403  | 79.549839  |             |            | 1  |

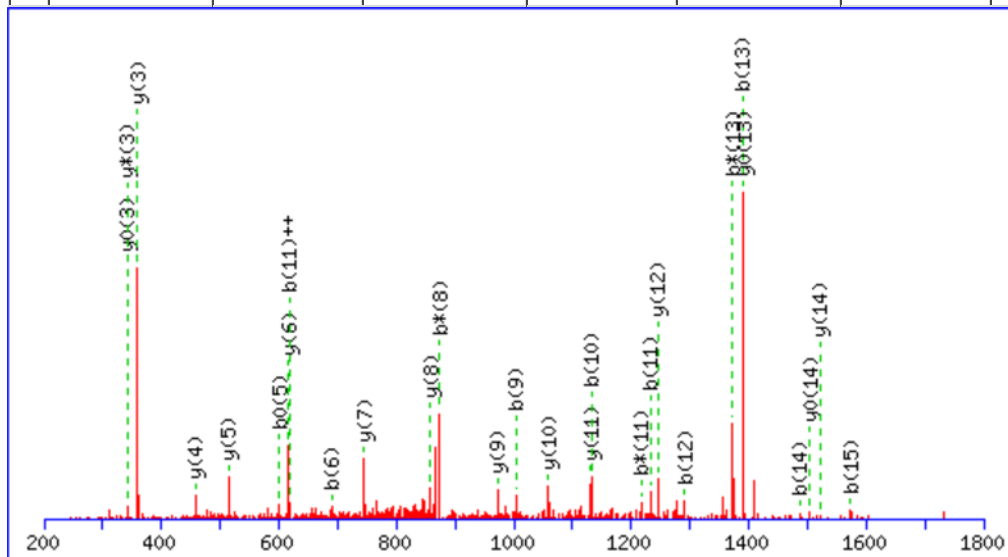

## Peptide View

MS/MS Fragmentation of **AVGLLTVISK**

Found in **IP100013446**, Tax\_Id=9606 Gene\_Symbol=PSCA Prostate stem cell antigen

**Experiment:** 13 - S\_E-1 **Fraction:** S\_E-1

Match to Query 3026: 999.633048 from(500.823800,2+)

Title: OECHL100310\_41.16988.16988.2.dta

Data file \\BOROMIR\Masse\Data LTQ-Orbitrap\Chrystelle Lacroix\Etude clinique sJPU\OECHL100310\_41.raw

**Monoisotopic mass of neutral peptide Mr(calc):** 999.632828**Fixed modifications:** Carbamidomethyl (C) (apply to specified residues or termini only)**Ions Score:** 67**Expect:** 2.3e-006**Matches :** 16/78 fragment ions using 24 most intense peaks ([help](#))

| #  | b                 | b <sup>++</sup>   | b <sup>0</sup> | b <sup>0++</sup> | Seq. | y                 | y <sup>++</sup>   | y*         | y* <sup>++</sup> | y <sup>0</sup> | y <sup>0++</sup> | #  |
|----|-------------------|-------------------|----------------|------------------|------|-------------------|-------------------|------------|------------------|----------------|------------------|----|
| 1  | 72.044390         | 36.525833         |                |                  | A    |                   |                   |            |                  |                |                  | 10 |
| 2  | <b>171.112804</b> | 86.060040         |                |                  | V    | <b>929.602995</b> | 465.305136        | 912.576446 | 456.791861       | 911.592430     | 456.299853       | 9  |
| 3  | <b>228.134268</b> | 114.570772        |                |                  | G    | <b>830.534581</b> | <b>415.770929</b> | 813.508032 | 407.257654       | 812.524016     | 406.765646       | 8  |
| 4  | <b>341.218332</b> | <b>171.112804</b> |                |                  | L    | 773.513117        | 387.260197        | 756.486568 | 378.746922       | 755.502552     | 378.254914       | 7  |
| 5  | <b>454.302396</b> | 227.654836        |                |                  | L    | <b>660.429053</b> | 330.718165        | 643.402504 | 322.204890       | 642.418488     | 321.712882       | 6  |
| 6  | <b>555.350075</b> | 278.178676        | 537.339510     | 269.173393       | T    | <b>547.344989</b> | 274.176133        | 530.318440 | 265.662858       | 529.334424     | 265.170850       | 5  |
| 7  | <b>654.418489</b> | 327.712883        | 636.407924     | 318.707600       | V    | 446.297310        | 223.652293        | 429.270761 | 215.139018       | 428.286745     | 214.647010       | 4  |
| 8  | <b>767.502553</b> | 384.254915        | 749.491988     | 375.249632       | I    | <b>347.228896</b> | 174.118086        | 330.202347 | 165.604811       | 329.218331     | 165.112803       | 3  |
| 9  | <b>854.534581</b> | 427.770929        | 836.524016     | 418.765646       | S    | <b>234.144832</b> | 117.576054        | 217.118283 | 109.062779       | 216.134267     | 108.570771       | 2  |
| 10 |                   |                   |                |                  | K    | 147.112804        | 74.060040         | 130.086255 | 65.546765        |                |                  | 1  |

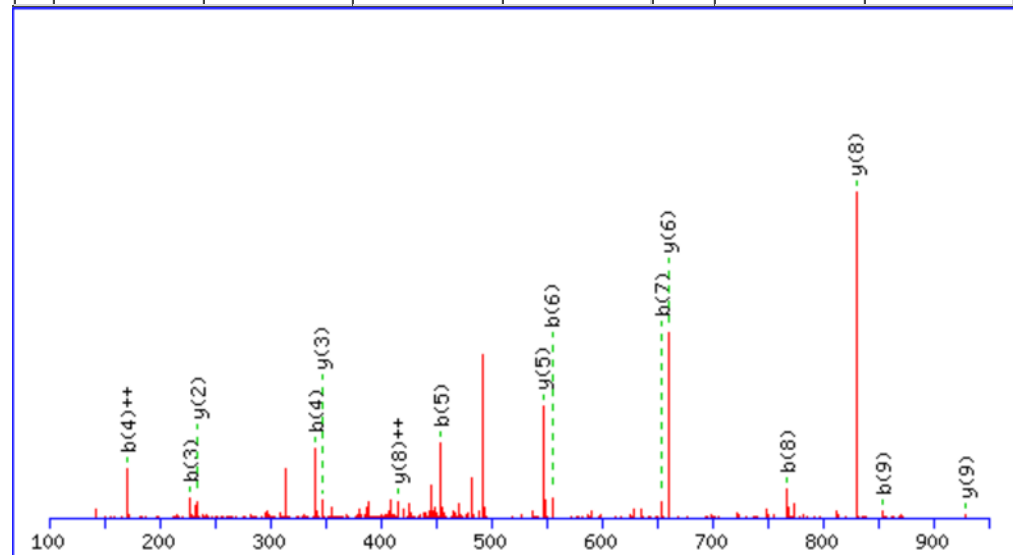

## Peptide View

MS/MS Fragmentation of **AGLEDLQVAFR**Found in **IPI00021536**, Tax\_Id=9606 Gene\_Symbol=CALML5 Calmodulin-like protein 5**Experiment:** 13 - S\_E-1 **Fraction:** S\_E-1

Match to Query 6301: 1217.640648 from(609.827600,2+)

Title: OECHL100310\_41.17471.17471.2.dta

Data file \\BOROMIR\Masse\Data LTQ-Orbitrap\Chrystelle Lacroix\Etude clinique sJPU\OECHL100310\_41.raw

**Monoisotopic mass of neutral peptide Mr(calc):** 1217.640427**Fixed modifications:** Carbamidomethyl (C) (apply to specified residues or termini only)**Ions Score:** 62**Expect:** 5.5e-005**Matches :** 17/90 fragment ions using 21 most intense peaks ([help](#))

| #  | b                  | b <sup>++</sup>   | b <sup>*</sup> | b <sup>*++</sup>  | b <sup>0</sup>    | b <sup>0++</sup>  | Seq. | y                  | y <sup>++</sup> | y <sup>*</sup> | y <sup>*++</sup> | y <sup>0</sup> | y <sup>0++</sup> | #  |
|----|--------------------|-------------------|----------------|-------------------|-------------------|-------------------|------|--------------------|-----------------|----------------|------------------|----------------|------------------|----|
| 1  | 72.044390          | 36.525833         |                |                   |                   |                   | A    |                    |                 |                |                  |                |                  | 11 |
| 2  | 129.065854         | 65.036565         |                |                   |                   |                   | G    | 1147.610600        | 574.308938      | 1130.584051    | 565.795664       | 1129.600035    | 565.303655       | 10 |
| 3  | <b>242.149918</b>  | 121.578597        |                |                   |                   |                   | L    | <b>1090.589136</b> | 545.798206      | 1073.562587    | 537.284931       | 1072.578571    | 536.792923       | 9  |
| 4  | 371.192511         | 186.099894        |                |                   | 353.181946        | 177.094611        | E    | <b>977.505072</b>  | 489.256174      | 960.478523     | 480.742899       | 959.494507     | 480.250891       | 8  |
| 5  | <b>486.219454</b>  | <b>243.613365</b> |                |                   | <b>468.208889</b> | 234.608083        | D    | <b>848.462479</b>  | 424.734877      | 831.435930     | 416.221603       | 830.451914     | 415.729595       | 7  |
| 6  | 599.303518         | 300.155397        |                |                   | 581.292953        | 291.150115        | L    | <b>733.435536</b>  | 367.221406      | 716.408987     | 358.708131       |                |                  | 6  |
| 7  | <b>727.362096</b>  | 364.184686        | 710.335547     | <b>355.671412</b> | 709.351531        | <b>355.179404</b> | Q    | 620.351472         | 310.679374      | 603.324923     | 302.166099       |                |                  | 5  |
| 8  | <b>826.430510</b>  | 413.718893        | 809.403961     | 405.205619        | 808.419945        | 404.713611        | V    | <b>492.292894</b>  | 246.650085      | 475.266345     | 238.136810       |                |                  | 4  |
| 9  | <b>897.467624</b>  | 449.237450        | 880.441075     | 440.724176        | 879.457059        | 440.232168        | A    | <b>393.224480</b>  | 197.115878      | 376.197931     | 188.602603       |                |                  | 3  |
| 10 | <b>1044.536038</b> | 522.771657        | 1027.509489    | 514.258383        | 1026.525473       | 513.766374        | F    | <b>322.187366</b>  | 161.597321      | 305.160817     | 153.084046       |                |                  | 2  |
| 11 |                    |                   |                |                   |                   |                   | R    | 175.118952         | 88.063114       | 158.092403     | 79.549839        |                |                  | 1  |

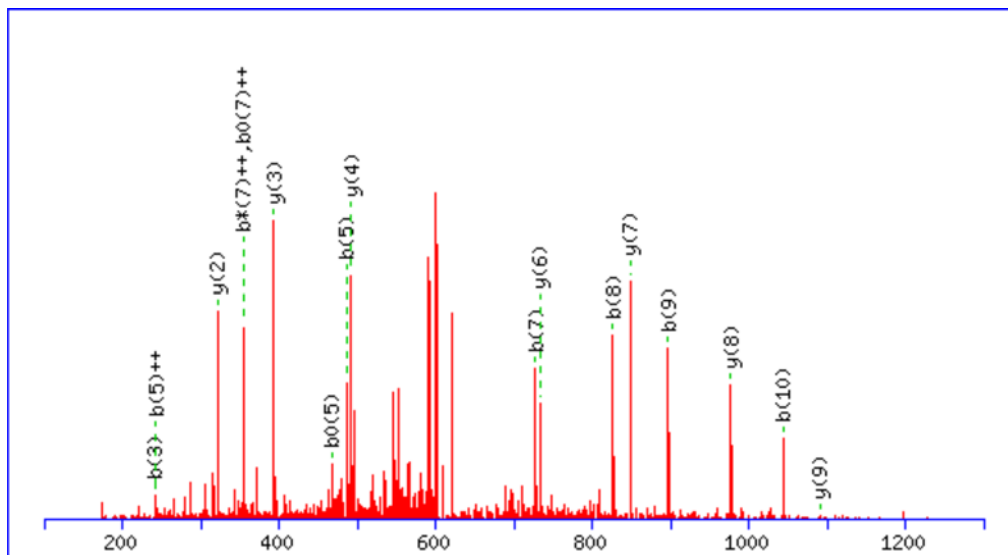

## Peptide View

MS/MS Fragmentation of **TCECRPGMICATSATNSCAR**

Found in **IPI00006073**, Tax\_Id=9606 Gene\_Symbol=TNFRSF8 Isoform Long of Tumor necrosis factor receptor superfamily member 8

**Experiment:** 13 - S\_E-1 **Fraction:** S\_E-1

Match to Query 14955: 2301.937872 from(768.319900,3+)

Title: OECHL100310\_41.7587.7587.3.dta

Data file \\BOROMIR\Masse\Data LTQ-Orbitrap\Chrystelle Lacroix\Etude clinique sJPU\OECHL100310\_41.raw

**Monoisotopic mass of neutral peptide Mr(calc):** 2301.938110 **Fixed modifications:** Carbamidomethyl (C) (apply to specified residues or termini only) **Ions Score:** 62

**Expect:** 1.5e-005 **Matches :** 38/214 fragment ions using 55 most intense peaks ([help](#))

| # | b                 | b <sup>++</sup> | b <sup>*</sup> | b <sup>*++</sup> | b <sup>0</sup> | b <sup>0++</sup> | Seq. | y                  | y <sup>++</sup>    | y <sup>*</sup> | y <sup>*++</sup>   | y <sup>0</sup> | y <sup>0++</sup> |
|---|-------------------|-----------------|----------------|------------------|----------------|------------------|------|--------------------|--------------------|----------------|--------------------|----------------|------------------|
| 1 | 102.054955        | 51.531116       |                |                  | 84.044390      | 42.525833        | T    |                    |                    |                |                    |                |                  |
| 2 | <b>262.085604</b> | 131.546440      |                |                  | 244.075039     | 122.541158       | C    | 2201.897712        | 1101.452494        | 2184.871163    | 1092.939219        | 2183.887147    | 1092.4472        |
| 3 | 391.128197        | 196.067737      |                |                  | 373.117632     | 187.062454       | E    | 2041.867063        | <b>1021.437170</b> | 2024.840514    | <b>1012.923895</b> | 2023.856498    | <b>1012.4318</b> |
| 4 | 551.158846        | 276.083061      |                |                  | 533.148281     | 267.077779       | C    | 1912.824470        | 956.915873         | 1895.797921    | 948.402599         | 1894.813905    | 947.9105         |
| 5 | 707.259957        | 354.133617      | 690.233408     | 345.620342       | 689.249392     | 345.128334       | R    | 1752.793821        | 876.900549         | 1735.767272    | 868.387274         | 1734.783256    | 867.8952         |
| 6 | 804.312721        | 402.659999      | 787.286172     | 394.146724       | 786.302156     | 393.654716       | P    | <b>1596.692710</b> | <b>798.849993</b>  | 1579.666161    | 790.336719         | 1578.682145    | 789.8447         |

|    |                    |                    |                    |                   |             |                   |          |                    |                   |                    |            |                    |                 |
|----|--------------------|--------------------|--------------------|-------------------|-------------|-------------------|----------|--------------------|-------------------|--------------------|------------|--------------------|-----------------|
| 7  | 861.334185         | 431.170731         | 844.307636         | 422.657456        | 843.323620  | 422.165448        | <b>G</b> | 1499.639946        | 750.323611        | 1482.613397        | 741.810337 | 1481.629381        | 741.3183        |
| 8  | 992.374670         | <b>496.690973</b>  | 975.348121         | 488.177699        | 974.364105  | 487.685691        | <b>M</b> | 1442.618482        | 721.812879        | 1425.591933        | 713.299605 | <b>1424.607917</b> | 712.8075        |
| 9  | <b>1105.458734</b> | <b>553.233005</b>  | 1088.432185        | 544.719731        | 1087.448169 | 544.227723        | <b>I</b> | <b>1311.577997</b> | 656.292637        | 1294.551448        | 647.779362 | 1293.567432        | 647.2873        |
| 10 | <b>1265.489383</b> | 633.248330         | <b>1248.462834</b> | 624.735055        | 1247.478818 | 624.243047        | <b>C</b> | <b>1198.493933</b> | <b>599.750605</b> | <b>1181.467384</b> | 591.237330 | 1180.483368        | <b>590.7453</b> |
| 11 | 1336.526497        | <b>668.766887</b>  | <b>1319.499948</b> | 660.253612        | 1318.515932 | 659.761604        | <b>A</b> | <b>1038.463284</b> | 519.735280        | <b>1021.436735</b> | 511.222006 | 1020.452719        | 510.7299        |
| 12 | 1437.574176        | <b>719.290726</b>  | 1420.547627        | 710.777452        | 1419.563611 | 710.285444        | <b>T</b> | <b>967.426170</b>  | 484.216723        | <b>950.399621</b>  | 475.703449 | 949.415605         | 475.2114        |
| 13 | 1524.606204        | 762.806740         | 1507.579655        | <b>754.293466</b> | 1506.595639 | <b>753.801458</b> | <b>S</b> | <b>866.378491</b>  | 433.692884        | 849.351942         | 425.179609 | <b>848.367926</b>  | 424.6876        |
| 14 | 1595.643318        | <b>798.325297</b>  | 1578.616769        | 789.812023        | 1577.632753 | 789.320015        | <b>A</b> | <b>779.346463</b>  | 390.176870        | 762.319914         | 381.663595 | 761.335898         | 381.1715        |
| 15 | 1696.690997        | <b>848.849137</b>  | 1679.664448        | 840.335862        | 1678.680432 | 839.843854        | <b>T</b> | <b>708.309349</b>  | 354.658313        | 691.282800         | 346.145038 | 690.298784         | 345.6530        |
| 16 | 1810.733924        | <b>905.870600</b>  | 1793.707375        | 897.357326        | 1792.723359 | 896.865318        | <b>N</b> | <b>607.261670</b>  | 304.134473        | <b>590.235121</b>  | 295.621199 | 589.251105         | 295.1291        |
| 17 | 1897.765952        | 949.386614         | 1880.739403        | 940.873340        | 1879.755387 | 940.381332        | <b>S</b> | <b>493.218743</b>  | 247.113010        | 476.192194         | 238.599735 | 475.208178         | 238.1077        |
| 18 | 2057.796601        | 1029.401938        | 2040.770052        | 1020.888664       | 2039.786036 | 1020.396656       | <b>C</b> | <b>406.186715</b>  | 203.596996        | 389.160166         | 195.083721 |                    |                 |
| 19 | 2128.833715        | <b>1064.920496</b> | 2111.807166        | 1056.407221       | 2110.823150 | 1055.915213       | <b>A</b> | 246.156066         | 123.581671        | 229.129517         | 115.068397 |                    |                 |
| 20 |                    |                    |                    |                   |             |                   | <b>R</b> | 175.118952         | 88.063114         | 158.092403         | 79.549839  |                    |                 |

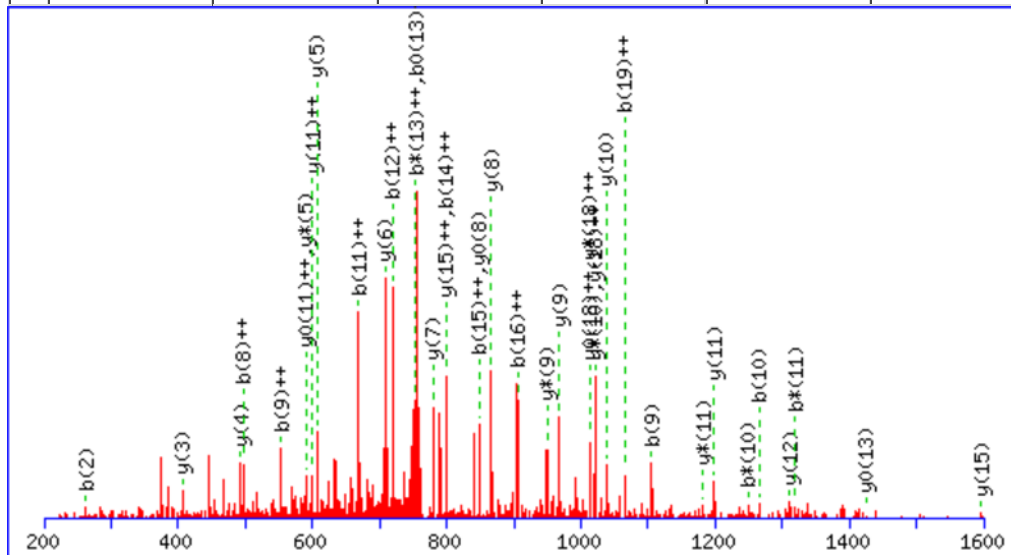

## Peptide View

MS/MS Fragmentation of **RGVSQAPTAAR**Found in **IPI00025365**, Tax\_Id=9606 Gene\_Symbol=EDN3 Isoform Long of Endothelin-3**Experiment:** 13 - S\_E-1 **Fraction:** S\_E-1

Match to Query 4648: 1112.605448 from(557.310000,2+)

Title: OECHL100310\_41.2024.2024.2.dta

Data file \\BOROMIR\Masse\Data LTQ-Orbitrap\Chrystelle Lacroix\Etude clinique sJPU\OECHL100310\_41.raw

**Monoisotopic mass of neutral peptide Mr(calc):** 1112.605042**Fixed modifications:** Carbamidomethyl (C) (apply to specified residues or termini only)**Ions Score:** 50**Expect:** 0.00086**Matches :** 21/108 fragment ions using 30 most intense peaks ([help](#))

| #  | b          | b <sup>++</sup> | b*         | b <sup>*++</sup> | b <sup>0</sup> | b <sup>0++</sup> | Seq. | y          | y <sup>++</sup> | y*         | y <sup>*++</sup> | y <sup>0</sup> | y <sup>0++</sup> | #  |
|----|------------|-----------------|------------|------------------|----------------|------------------|------|------------|-----------------|------------|------------------|----------------|------------------|----|
| 1  | 157.108387 | 79.057831       | 140.081838 | 70.544557        |                |                  | R    |            |                 |            |                  |                |                  | 11 |
| 2  | 214.129851 | 107.568564      | 197.103302 | 99.055289        |                |                  | G    | 957.511221 | 479.259249      | 940.484672 | 470.745974       | 939.500656     | 470.253966       | 10 |
| 3  | 313.198265 | 157.102770      | 296.171716 | 148.589496       |                |                  | V    | 900.489757 | 450.748517      | 883.463208 | 442.235242       | 882.479192     | 441.743234       | 9  |
| 4  | 400.230293 | 200.618785      | 383.203744 | 192.105510       | 382.219728     | 191.613502       | S    | 801.421343 | 401.214310      | 784.394794 | 392.701035       | 783.410778     | 392.209027       | 8  |
| 5  | 528.288871 | 264.648074      | 511.262322 | 256.134799       | 510.278306     | 255.642791       | Q    | 714.389315 | 357.698296      | 697.362766 | 349.185021       | 696.378750     | 348.693013       | 7  |
| 6  | 599.325985 | 300.166631      | 582.299436 | 291.653356       | 581.315420     | 291.161348       | A    | 586.330737 | 293.669007      | 569.304188 | 285.155732       | 568.320172     | 284.663724       | 6  |
| 7  | 696.378749 | 348.693013      | 679.352200 | 340.179738       | 678.368184     | 339.687730       | P    | 515.293623 | 258.150450      | 498.267074 | 249.637175       | 497.283058     | 249.145167       | 5  |
| 8  | 797.426428 | 399.216852      | 780.399879 | 390.703578       | 779.415863     | 390.211570       | T    | 418.240859 | 209.624068      | 401.214310 | 201.110793       | 400.230294     | 200.618785       | 4  |
| 9  | 868.463542 | 434.735409      | 851.436993 | 426.222135       | 850.452977     | 425.730127       | A    | 317.193180 | 159.100228      | 300.166631 | 150.586953       |                |                  | 3  |
| 10 | 939.500656 | 470.253966      | 922.474107 | 461.740692       | 921.490091     | 461.248684       | A    | 246.156066 | 123.581671      | 229.129517 | 115.068397       |                |                  | 2  |
| 11 |            |                 |            |                  |                |                  | R    | 175.118952 | 88.063114       | 158.092403 | 79.549840        |                |                  | 1  |

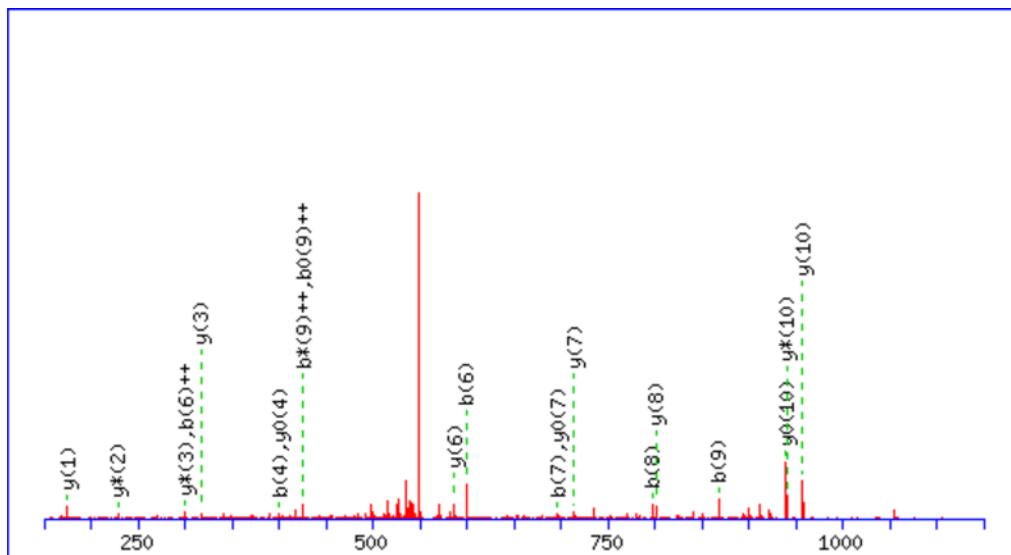

## Peptide View

MS/MS Fragmentation of **AHGQESAIFNEVAPGYFSR**

Found in **IPI00170635**, Tax\_Id=9606 Gene\_Symbol=SECTM1 Secreted and transmembrane protein 1

**Experiment:** 43 - OPE-1 **Fraction:** OPE-1

Match to Query 14166: 2078.981448 from(1040.498000,2+)

Title: OECHL100310\_39.16491.16491.2.dta

Data file \\BOROMIR\Masse\Data LTQ-Orbitrap\Chrystelle Lacroix\Etude clinique sJPU\OECHL100310\_39.raw

**Monoisotopic mass of neutral peptide Mr(calc):** 2078.980988**Fixed modifications:** Carbamidomethyl (C) (apply to specified residues or termini only)**Ions Score:** 82

**Expect:** 9.7e-007**Matches :** 33/200 fragment ions using 48 most intense peaks ([help](#))

| # | b          | b <sup>++</sup> | b*         | b* <sup>++</sup> | b <sup>0</sup> | b <sup>0++</sup> | Seq. | y           | y <sup>++</sup> | y*          | y* <sup>++</sup> | y <sup>0</sup> | y <sup>0++</sup> | #  |
|---|------------|-----------------|------------|------------------|----------------|------------------|------|-------------|-----------------|-------------|------------------|----------------|------------------|----|
| 1 | 72.044390  | 36.525833       |            |                  |                |                  | A    |             |                 |             |                  |                |                  | 19 |
| 2 | 209.103302 | 105.055289      |            |                  |                |                  | H    | 2008.951166 | 1004.979221     | 1991.924617 | 996.465947       | 1990.940601    | 995.973939       | 18 |
| 3 | 266.124766 | 133.566021      |            |                  |                |                  | G    | 1871.892254 | 936.449765      | 1854.865705 | 927.936491       | 1853.881689    | 927.444483       | 17 |
| 4 | 394.183344 | 197.595310      | 377.156795 | 189.082035       |                |                  | Q    | 1814.870790 | 907.939033      | 1797.844241 | 899.425759       | 1796.860225    | 898.933751       | 16 |
| 5 | 523.225937 | 262.116607      | 506.199388 | 253.603332       | 505.215372     | 253.111324       | E    | 1686.812212 | 843.909744      | 1669.785663 | 835.396470       | 1668.801647    | 834.904462       | 15 |
| 6 | 610.257965 | 305.632621      | 593.231416 | 297.119346       | 592.247400     | 296.627338       | S    | 1557.769619 | 779.388448      | 1540.743070 | 770.875173       | 1539.759054    | 770.383165       | 14 |

|    |                    |                   |                    |            |                    |            |   |                    |            |                   |                   |             |                   |    |
|----|--------------------|-------------------|--------------------|------------|--------------------|------------|---|--------------------|------------|-------------------|-------------------|-------------|-------------------|----|
| 7  | <b>681.295079</b>  | 341.151178        | 664.268530         | 332.637903 | <b>663.284514</b>  | 332.145895 | A | <b>1470.737591</b> | 735.872434 | 1453.711042       | <b>727.359159</b> | 1452.727026 | <b>726.867151</b> | 13 |
| 8  | 794.379143         | 397.693210        | 777.352594         | 389.179935 | 776.368578         | 388.687927 | I | <b>1399.700477</b> | 700.353877 | 1382.673928       | 691.840602        | 1381.689912 | 691.348594        | 12 |
| 9  | <b>941.447557</b>  | 471.227417        | 924.421008         | 462.714142 | 923.436992         | 462.222134 | F | <b>1286.616413</b> | 643.811845 | 1269.589864       | 635.298570        | 1268.605848 | 634.806562        | 11 |
| 10 | 1055.490484        | 528.248880        | 1038.463935        | 519.735606 | 1037.479919        | 519.243597 | N | <b>1139.547999</b> | 570.277638 | 1122.521450       | 561.764363        | 1121.537434 | 561.272355        | 10 |
| 11 | <b>1184.533077</b> | 592.770176        | 1167.506528        | 584.256902 | 1166.522512        | 583.764894 | E | <b>1025.505072</b> | 513.256174 | 1008.478523       | 504.742900        | 1007.494507 | 504.250892        | 9  |
| 12 | <b>1283.601491</b> | 642.304383        | 1266.574942        | 633.791109 | 1265.590926        | 633.299101 | V | <b>896.462479</b>  | 448.734878 | 879.435930        | 440.221603        | 878.451914  | 439.729595        | 8  |
| 13 | <b>1354.638605</b> | 677.822940        | 1337.612056        | 669.309666 | 1336.628040        | 668.817658 | A | <b>797.394065</b>  | 399.200671 | 780.367516        | 390.687396        | 779.383500  | 390.195388        | 7  |
| 14 | 1451.691369        | <b>726.349322</b> | 1434.664820        | 717.836048 | 1433.680804        | 717.344040 | P | <b>726.356951</b>  | 363.682114 | <b>709.330402</b> | 355.168839        | 708.346386  | 354.676831        | 6  |
| 15 | 1508.712833        | 754.860054        | 1491.686284        | 746.346780 | 1490.702268        | 745.854772 | G | 629.304187         | 315.155732 | 612.277638        | 306.642457        | 611.293622  | 306.150449        | 5  |
| 16 | <b>1671.776162</b> | 836.391719        | <b>1654.749613</b> | 827.878445 | 1653.765597        | 827.386436 | Y | 572.282723         | 286.645000 | 555.256174        | 278.131725        | 554.272158  | 277.639717        | 4  |
| 17 | 1818.844576        | 909.925926        | 1801.818027        | 901.412652 | <b>1800.834011</b> | 900.920643 | F | <b>409.219394</b>  | 205.113335 | 392.192845        | 196.600061        | 391.208829  | 196.108053        | 3  |
| 18 | 1905.876604        | 953.441940        | 1888.850055        | 944.928666 | 1887.866039        | 944.436658 | S | 262.150980         | 131.579128 | 245.124431        | 123.065854        | 244.140415  | 122.573846        | 2  |
| 19 |                    |                   |                    |            |                    |            | R | 175.118952         | 88.063114  | 158.092403        | 79.549840         |             |                   | 1  |

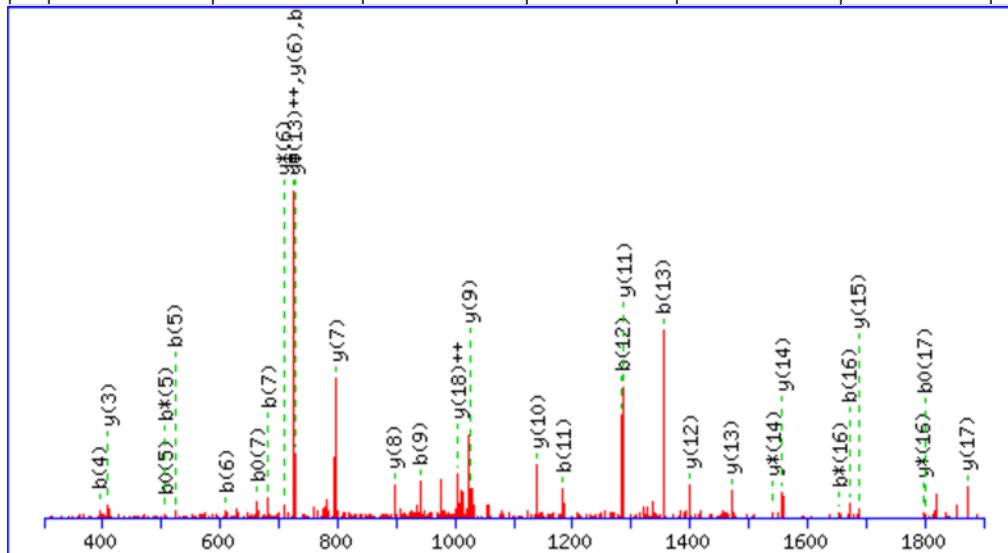

## Peptide View

MS/MS Fragmentation of **GLDTSLGAVQSDTGR**



Found in **IPI00289931**, Tax\_Id=9606 Gene\_Symbol=MADCAM1 MADCAM1 protein

**Experiment:** 43 - OPE-1 **Fraction:** OPE-1

Match to Query 9341: 1475.721448 from(738.868000,2+)

Title: OECHL100310\_39.10951.10951.2.dta

Data file \\BOROMIR\Masse\Data LTQ-Orbitrap\Chrystelle Lacroix\Etude clinique sJPU\OECHL100310\_39.raw

**Monoisotopic mass of neutral peptide Mr(calc):** 1475.721619 **Fixed modifications:** Carbamidomethyl (C) (apply to specified residues or termini only) **Ions Score:** 90

**Expect:** 1.2e-007 **Matches :** 27/142 fragment ions using 38 most intense peaks ([help](#))

| #  | b                  | b <sup>++</sup> | b <sup>*</sup> | b <sup>*++</sup> | b <sup>0</sup>    | b <sup>0++</sup> | Seq. | y                  | y <sup>++</sup> | y <sup>*</sup> | y <sup>*++</sup>  | y <sup>0</sup> | y <sup>0++</sup>  | #  |
|----|--------------------|-----------------|----------------|------------------|-------------------|------------------|------|--------------------|-----------------|----------------|-------------------|----------------|-------------------|----|
| 1  | 58.028740          | 29.518008       |                |                  |                   |                  | G    |                    |                 |                |                   |                |                   | 15 |
| 2  | 171.112804         | 86.060040       |                |                  |                   |                  | L    | 1419.707414        | 710.357345      | 1402.680865    | 701.844071        | 1401.696849    | 701.352063        | 14 |
| 3  | <b>286.139747</b>  | 143.573512      |                |                  | 268.129182        | 134.568229       | D    | 1306.623350        | 653.815313      | 1289.596801    | 645.302039        | 1288.612785    | 644.810031        | 13 |
| 4  | <b>387.187426</b>  | 194.097351      |                |                  | 369.176861        | 185.092069       | T    | <b>1191.596407</b> | 596.301842      | 1174.569858    | <b>587.788567</b> | 1173.585842    | <b>587.296559</b> | 12 |
| 5  | <b>474.219454</b>  | 237.613365      |                |                  | <b>456.208889</b> | 228.608082       | S    | <b>1090.548728</b> | 545.778002      | 1073.522179    | 537.264728        | 1072.538163    | 536.772719        | 11 |
| 6  | <b>587.303518</b>  | 294.155397      |                |                  | <b>569.292953</b> | 285.150115       | L    | <b>1003.516700</b> | 502.261988      | 986.490151     | 493.748714        | 985.506135     | 493.256706        | 10 |
| 7  | 644.324982         | 322.666129      |                |                  | 626.314417        | 313.660847       | G    | <b>890.432636</b>  | 445.719956      | 873.406087     | 437.206682        | 872.422071     | 436.714674        | 9  |
| 8  | <b>715.362096</b>  | 358.184686      |                |                  | <b>697.351531</b> | 349.179404       | A    | <b>833.411172</b>  | 417.209224      | 816.384623     | 408.695950        | 815.400607     | 408.203942        | 8  |
| 9  | <b>814.430510</b>  | 407.718893      |                |                  | 796.419945        | 398.713611       | V    | <b>762.374058</b>  | 381.690667      | 745.347509     | 373.177393        | 744.363493     | 372.685385        | 7  |
| 10 | <b>942.489088</b>  | 471.748182      | 925.462539     | 463.234908       | 924.478523        | 462.742900       | Q    | <b>663.305644</b>  | 332.156460      | 646.279095     | 323.643186        | 645.295079     | 323.151178        | 6  |
| 11 | <b>1029.521116</b> | 515.264196      | 1012.494567    | 506.750922       | 1011.510551       | 506.258914       | S    | <b>535.247066</b>  | 268.127171      | 518.220517     | 259.613897        | 517.236501     | 259.121889        | 5  |
| 12 | <b>1144.548059</b> | 572.777668      | 1127.521510    | 564.264393       | 1126.537494       | 563.772385       | D    | <b>448.215038</b>  | 224.611157      | 431.188489     | 216.097882        | 430.204473     | 215.605874        | 4  |
| 13 | <b>1245.595738</b> | 623.301507      | 1228.569189    | 614.788233       | 1227.585173       | 614.296225       | T    | <b>333.188095</b>  | 167.097685      | 316.161546     | 158.584411        | 315.177530     | 158.092403        | 3  |
| 14 | <b>1302.617202</b> | 651.812239      | 1285.590653    | 643.298965       | 1284.606637       | 642.806957       | G    | <b>232.140416</b>  | 116.573846      | 215.113867     | 108.060571        |                |                   | 2  |
| 15 |                    |                 |                |                  |                   |                  | R    | 175.118952         | 88.063114       | 158.092403     | 79.549839         |                |                   | 1  |

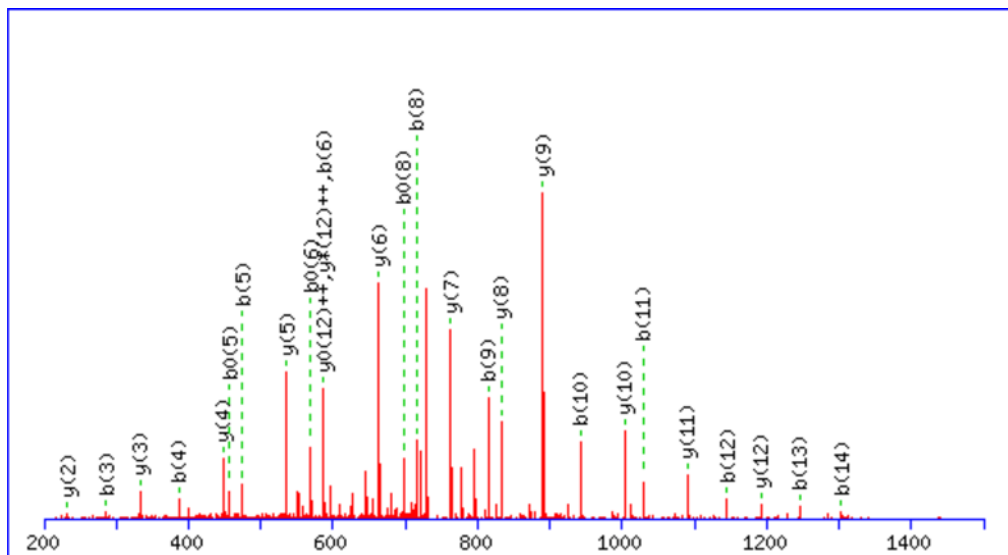

## Peptide View

MS/MS Fragmentation of **EVQLVESGGGLVKPGGSLR**

Found in **IPI00783024**, Tax\_Id=9606 Gene\_Symbol=- Myosin-reactive immunoglobulin heavy chain variable region (Fragment)

**Experiment:** 43 - OPE-1 **Fraction:** OPE-1

Match to Query 13148: 1881.032648 from(941.523600,2+)

Title: OECHL100310\_39.13360.13360.2.dta

Data file \\BOROMIR\Masse\Data LTQ-Orbitrap\Chrystelle Lacroix\Etude clinique sJPU\OECHL100310\_39.raw

**Monoisotopic mass of neutral peptide Mr(calc):** 1881.031982 **Fixed modifications:** Carbamidomethyl (C) (apply to specified residues or termini only) **Ions Score:** 98

**Expect:** 7.6e-009 **Matches :** 61/208 fragment ions using 92 most intense peaks ([help](#))

| # | b                 | b <sup>++</sup> | b*                | b* <sup>++</sup>  | b <sup>0</sup>    | b <sup>0++</sup>  | Seq.     | y                  | y <sup>++</sup>   | y*                 | y* <sup>++</sup>  | y <sup>0</sup>     | y <sup>0++</sup>  | #         |
|---|-------------------|-----------------|-------------------|-------------------|-------------------|-------------------|----------|--------------------|-------------------|--------------------|-------------------|--------------------|-------------------|-----------|
| 1 | 130.049869        | 65.528572       |                   |                   | 112.039304        | 56.523290         | <b>E</b> |                    |                   |                    |                   |                    |                   | <b>19</b> |
| 2 | 229.118283        | 115.062780      |                   |                   | 211.107718        | 106.057497        | <b>V</b> | 1752.996660        | <b>877.001968</b> | 1735.970111        | 868.488694        | 1734.986095        | 867.996686        | <b>18</b> |
| 3 | <b>357.176861</b> | 179.092069      | <b>340.150312</b> | 170.578794        | <b>339.166296</b> | 170.086786        | <b>Q</b> | <b>1653.928246</b> | <b>827.467761</b> | 1636.901697        | <b>818.954487</b> | 1635.917681        | <b>818.462479</b> | <b>17</b> |
| 4 | <b>470.260925</b> | 235.634101      | <b>453.234376</b> | 227.120826        | <b>452.250360</b> | 226.628818        | <b>L</b> | <b>1525.869668</b> | <b>763.438472</b> | 1508.843119        | 754.925198        | 1507.859103        | 754.433190        | <b>16</b> |
| 5 | <b>569.329339</b> | 285.168308      | <b>552.302790</b> | 276.655033        | <b>551.318774</b> | 276.163025        | <b>V</b> | <b>1412.785604</b> | <b>706.896440</b> | 1395.759055        | <b>698.383166</b> | <b>1394.775039</b> | <b>697.891158</b> | <b>15</b> |
| 6 | <b>698.371932</b> | 349.689604      | 681.345383        | <b>341.176330</b> | 680.361367        | <b>340.684322</b> | <b>E</b> | <b>1313.717190</b> | <b>657.362233</b> | <b>1296.690641</b> | 648.848959        | <b>1295.706625</b> | 648.356951        | <b>14</b> |

|    |                    |                   |                    |                   |                    |            |   |                    |                   |                   |            |                   |            |           |
|----|--------------------|-------------------|--------------------|-------------------|--------------------|------------|---|--------------------|-------------------|-------------------|------------|-------------------|------------|-----------|
| 7  | 785.403960         | 393.205618        | 768.377411         | 384.692344        | 767.393395         | 384.200336 | S | <b>1184.674597</b> | <b>592.840937</b> | 1167.648048       | 584.327662 | 1166.664032       | 583.835654 | <b>13</b> |
| 8  | 842.425424         | 421.716350        | 825.398875         | 413.203076        | 824.414859         | 412.711068 | G | <b>1097.642569</b> | 549.324923        | 1080.616020       | 540.811648 | 1079.632004       | 540.319640 | <b>12</b> |
| 9  | 899.446888         | 450.227082        | 882.420339         | 441.713808        | 881.436323         | 441.221800 | G | <b>1040.621105</b> | 520.814191        | 1023.594556       | 512.300916 | 1022.610540       | 511.808908 | <b>11</b> |
| 10 | <b>956.468352</b>  | 478.737814        | 939.441803         | <b>470.224540</b> | 938.457787         | 469.732532 | G | <b>983.599641</b>  | 492.303459        | 966.573092        | 483.790184 | 965.589076        | 483.298176 | <b>10</b> |
| 11 | <b>1069.552416</b> | 535.279846        | <b>1052.525867</b> | 526.766572        | <b>1051.541851</b> | 526.274564 | L | <b>926.578177</b>  | 463.792727        | 909.551628        | 455.279452 | 908.567612        | 454.787444 | <b>9</b>  |
| 12 | <b>1168.620830</b> | 584.814053        | <b>1151.594281</b> | 576.300779        | <b>1150.610265</b> | 575.808771 | V | <b>813.494113</b>  | 407.250695        | 796.467564        | 398.737420 | 795.483548        | 398.245412 | <b>8</b>  |
| 13 | <b>1296.715793</b> | 648.861535        | 1279.689244        | 640.348260        | <b>1278.705228</b> | 639.856252 | K | <b>714.425699</b>  | <b>357.716487</b> | <b>697.399150</b> | 349.203213 | 696.415134        | 348.711205 | <b>7</b>  |
| 14 | <b>1393.768557</b> | <b>697.387917</b> | <b>1376.742008</b> | 688.874642        | 1375.757992        | 688.382634 | P | <b>586.330736</b>  | 293.669006        | <b>569.304187</b> | 285.155731 | <b>568.320171</b> | 284.663723 | <b>6</b>  |
| 15 | 1450.790021        | 725.898649        | 1433.763472        | 717.385374        | <b>1432.779456</b> | 716.893366 | G | <b>489.277972</b>  | 245.142624        | 472.251423        | 236.629349 | 471.267407        | 236.137341 | <b>5</b>  |
| 16 | 1507.811485        | 754.409381        | 1490.784936        | 745.896106        | 1489.800920        | 745.404098 | G | <b>432.256508</b>  | 216.631892        | 415.229959        | 208.118617 | 414.245943        | 207.626609 | <b>4</b>  |
| 17 | 1594.843513        | 797.925395        | 1577.816964        | 789.412120        | 1576.832948        | 788.920112 | S | <b>375.235044</b>  | 188.121160        | 358.208495        | 179.607885 | <b>357.224479</b> | 179.115877 | <b>3</b>  |
| 18 | <b>1707.927577</b> | 854.467427        | 1690.901028        | 845.954152        | <b>1689.917012</b> | 845.462144 | L | 288.203016         | 144.605146        | 271.176467        | 136.091871 |                   |            | <b>2</b>  |
| 19 |                    |                   |                    |                   |                    |            | R | 175.118952         | 88.063114         | 158.092403        | 79.549839  |                   |            | <b>1</b>  |

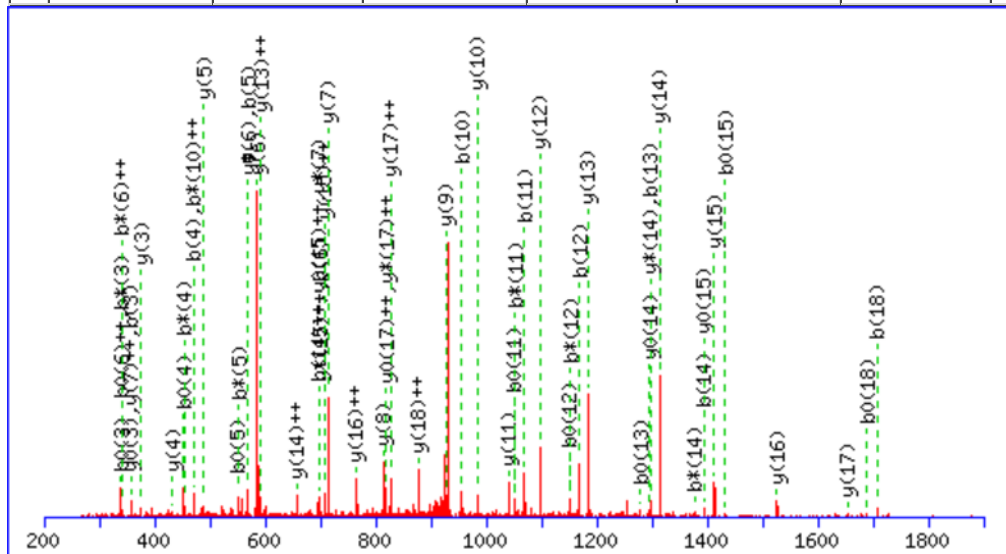

## Peptide View

MS/MS Fragmentation of **AADDTWEPFASGK**

Found in **IPI00022432**, Tax\_Id=9606 Gene\_Symbol=TTR Transthyretin

**Experiment:** 43 - OPE-1 **Fraction:** OPE-1

Match to Query 8410: 1393.615048 from(697.814800,2+)

Title: OECHL100310\_39.14738.14738.2.dta

Data file \\BOROMIR\Masse\Data LTQ-Orbitrap\Chrystelle Lacroix\Etude clinique sJPU\OECHL100310\_39.raw

**Monoisotopic mass of neutral peptide Mr(calc):** 1393.615005 **Fixed modifications:** Carbamidomethyl (C) (apply to specified residues or termini only) **Ions Score:** 67

**Expect:** 1.1e-005 **Matches :** 25/112 fragment ions using 47 most intense peaks ([help](#))

| #  | b                  | b <sup>++</sup> | b <sup>0</sup>     | b <sup>0++</sup> | Seq. | y                  | y <sup>++</sup> | y*                | y <sup>*++</sup> | y <sup>0</sup>    | y <sup>0++</sup> | #  |
|----|--------------------|-----------------|--------------------|------------------|------|--------------------|-----------------|-------------------|------------------|-------------------|------------------|----|
| 1  | 72.044390          | 36.525833       |                    |                  | A    |                    |                 |                   |                  |                   |                  | 13 |
| 2  | 143.081504         | 72.044390       |                    |                  | A    | 1323.585173        | 662.296225      | 1306.558624       | 653.782950       | 1305.574608       | 653.290942       | 12 |
| 3  | <b>258.108447</b>  | 129.557862      | 240.097882         | 120.552579       | D    | <b>1252.548059</b> | 626.777668      | 1235.521510       | 618.264393       | 1234.537494       | 617.772385       | 11 |
| 4  | <b>373.135390</b>  | 187.071333      | 355.124825         | 178.066051       | D    | <b>1137.521116</b> | 569.264196      | 1120.494567       | 560.750922       | 1119.510551       | 560.258914       | 10 |
| 5  | <b>474.183069</b>  | 237.595173      | <b>456.172504</b>  | 228.589890       | T    | <b>1022.494173</b> | 511.750725      | 1005.467624       | 503.237450       | 1004.483608       | 502.745442       | 9  |
| 6  | <b>660.262382</b>  | 330.634829      | 642.251817         | 321.629547       | W    | <b>921.446494</b>  | 461.226885      | 904.419945        | 452.713611       | 903.435929        | 452.221603       | 8  |
| 7  | <b>789.304975</b>  | 395.156126      | <b>771.294410</b>  | 386.150843       | E    | <b>735.367181</b>  | 368.187229      | 718.340632        | 359.673954       | 717.356616        | 359.181946       | 7  |
| 8  | 886.357739         | 443.682508      | 868.347174         | 434.677225       | P    | <b>606.324588</b>  | 303.665932      | <b>589.298039</b> | 295.152658       | <b>588.314023</b> | 294.660650       | 6  |
| 9  | <b>1033.426153</b> | 517.216715      | 1015.415588        | 508.211432       | F    | <b>509.271824</b>  | 255.139550      | 492.245275        | 246.626275       | 491.261259        | 246.134267       | 5  |
| 10 | <b>1104.463267</b> | 552.735272      | <b>1086.452702</b> | 543.729989       | A    | <b>362.203410</b>  | 181.605343      | 345.176861        | 173.092068       | 344.192845        | 172.600060       | 4  |
| 11 | <b>1191.495295</b> | 596.251286      | 1173.484730        | 587.246003       | S    | <b>291.166296</b>  | 146.086786      | 274.139747        | 137.573512       | 273.155731        | 137.081504       | 3  |
| 12 | <b>1248.516759</b> | 624.762018      | <b>1230.506194</b> | 615.756735       | G    | <b>204.134268</b>  | 102.570772      | 187.107719        | 94.057497        |                   |                  | 2  |
| 13 |                    |                 |                    |                  | K    | 147.112804         | 74.060040       | 130.086255        | 65.546765        |                   |                  | 1  |

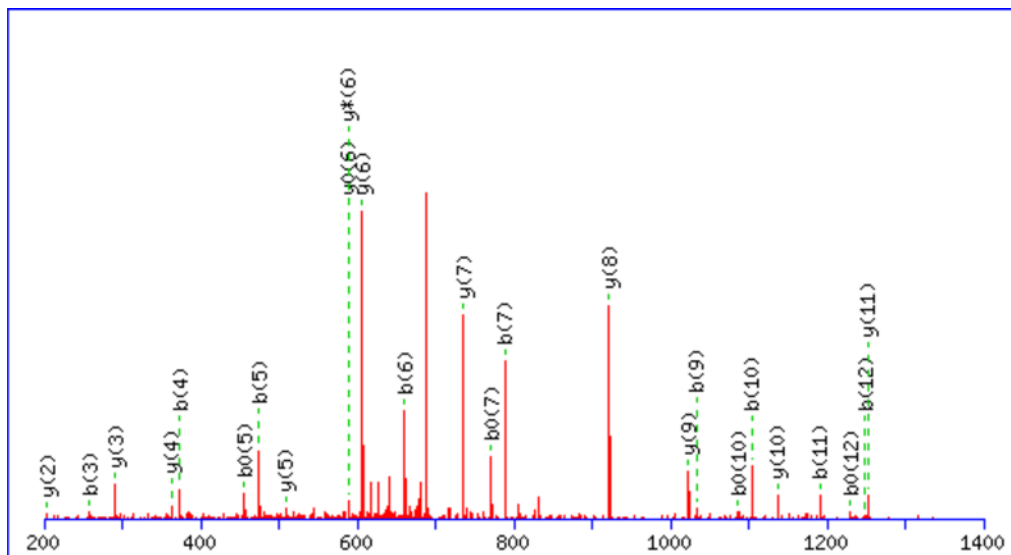

## Peptide View

MS/MS Fragmentation of **SKEDSNSTESKSSSEEDGQLK**

Found in **IPI00012734**, Tax\_Id=9606 Gene\_Symbol=DMP1 Isoform 1 of Dentin matrix acidic phosphoprotein 1

**Experiment:** 43 - OPE-1 **Fraction:** OPE-1

Match to Query 14950: 2271.001448 from(1136.508000,2+)

Title: OECHL100310\_39.2158.2158.2.dta

Data file \\BOROMIR\Masse\Data LTQ-Orbitrap\Chrystelle Lacroix\Etude clinique sJPU\OECHL100310\_39.raw

**Monoisotopic mass of neutral peptide Mr(calc):** 2270.998581 **Fixed modifications:** Carbamidomethyl (C) (apply to specified residues or termini only) **Ions Score:** 60

**Expect:** 8e-005 **Matches :** 39/230 fragment ions using 85 most intense peaks ([help](#))

| # | b                 | b <sup>++</sup> | b*                | b <sup>*++</sup> | b <sup>0</sup> | b <sup>0++</sup> | Seq. | y           | y <sup>++</sup> | y*          | y <sup>*++</sup> | y <sup>0</sup> | y <sup>0++</sup> |
|---|-------------------|-----------------|-------------------|------------------|----------------|------------------|------|-------------|-----------------|-------------|------------------|----------------|------------------|
| 1 | 88.039304         | 44.523290       |                   |                  | 70.028739      | 35.518008        | S    |             |                 |             |                  |                |                  |
| 2 | 216.134267        | 108.570771      | 199.107718        | 100.057497       | 198.123702     | 99.565489        | K    | 2184.973868 | 1092.990572     | 2167.947319 | 1084.477297      | 2166.963303    | 1083.9852        |
| 3 | 345.176860        | 173.092068      | 328.150311        | 164.578793       | 327.166295     | 164.086785       | E    | 2056.878905 | 1028.943090     | 2039.852356 | 1020.429816      | 2038.868340    | 1019.9378        |
| 4 | <b>460.203803</b> | 230.605539      | 443.177254        | 222.092265       | 442.193238     | 221.600257       | D    | 1927.836312 | 964.421794      | 1910.809763 | 955.908520       | 1909.825747    | 955.4165         |
| 5 | 547.235831        | 274.121554      | 530.209282        | 265.608279       | 529.225266     | 265.116271       | S    | 1812.809369 | 906.908323      | 1795.782820 | 898.395048       | 1794.798804    | 897.9030         |
| 6 | <b>661.278758</b> | 331.143017      | <b>644.252209</b> | 322.629743       | 643.268193     | 322.137735       | N    | 1725.777341 | 863.392309      | 1708.750792 | 854.879034       | 1707.766776    | 854.3870         |

|    |             |             |             |             |             |             |   |             |            |             |            |             |          |
|----|-------------|-------------|-------------|-------------|-------------|-------------|---|-------------|------------|-------------|------------|-------------|----------|
| 7  | 748.310786  | 374.659031  | 731.284237  | 366.145757  | 730.300221  | 365.653749  | S | 1611.734414 | 806.370845 | 1594.707865 | 797.857571 | 1593.723849 | 797.3655 |
| 8  | 849.358465  | 425.182871  | 832.331916  | 416.669596  | 831.347900  | 416.177588  | T | 1524.702386 | 762.854831 | 1507.675837 | 754.341557 | 1506.691821 | 753.8495 |
| 9  | 978.401058  | 489.704167  | 961.374509  | 481.190893  | 960.390493  | 480.698885  | E | 1423.654707 | 712.330992 | 1406.628158 | 703.817717 | 1405.644142 | 703.3257 |
| 10 | 1065.433086 | 533.220181  | 1048.406537 | 524.706907  | 1047.422521 | 524.214899  | S | 1294.612114 | 647.809695 | 1277.585565 | 639.296421 | 1276.601549 | 638.8044 |
| 11 | 1193.528049 | 597.267663  | 1176.501500 | 588.754388  | 1175.517484 | 588.262380  | K | 1207.580086 | 604.293681 | 1190.553537 | 595.780407 | 1189.569521 | 595.2883 |
| 12 | 1280.560077 | 640.783677  | 1263.533528 | 632.270402  | 1262.549512 | 631.778394  | S | 1079.485123 | 540.246200 | 1062.458574 | 531.732925 | 1061.474558 | 531.2409 |
| 13 | 1367.592105 | 684.299691  | 1350.565556 | 675.786416  | 1349.581540 | 675.294408  | S | 992.453095  | 496.730186 | 975.426546  | 488.216911 | 974.442530  | 487.7249 |
| 14 | 1454.624133 | 727.815705  | 1437.597584 | 719.302430  | 1436.613568 | 718.810422  | S | 905.421067  | 453.214172 | 888.394518  | 444.700897 | 887.410502  | 444.2088 |
| 15 | 1583.666726 | 792.337001  | 1566.640177 | 783.823727  | 1565.656161 | 783.331719  | E | 818.389039  | 409.698158 | 801.362490  | 401.184883 | 800.378474  | 400.6928 |
| 16 | 1712.709319 | 856.858298  | 1695.682770 | 848.345023  | 1694.698754 | 847.853015  | E | 689.346446  | 345.176861 | 672.319897  | 336.663587 | 671.335881  | 336.1715 |
| 17 | 1827.736262 | 914.371769  | 1810.709713 | 905.858495  | 1809.725697 | 905.366487  | D | 560.303853  | 280.655565 | 543.277304  | 272.142290 | 542.293288  | 271.6502 |
| 18 | 1884.757726 | 942.882501  | 1867.731177 | 934.369227  | 1866.747161 | 933.877219  | G | 445.276910  | 223.142093 | 428.250361  | 214.628818 |             |          |
| 19 | 2012.816304 | 1006.911790 | 1995.789755 | 998.398516  | 1994.805739 | 997.906508  | Q | 388.255446  | 194.631361 | 371.228897  | 186.118087 |             |          |
| 20 | 2125.900368 | 1063.453822 | 2108.873819 | 1054.940547 | 2107.889803 | 1054.448539 | L | 260.196868  | 130.602072 | 243.170319  | 122.088798 |             |          |
| 21 |             |             |             |             |             |             | K | 147.112804  | 74.060040  | 130.086255  | 65.546765  |             |          |

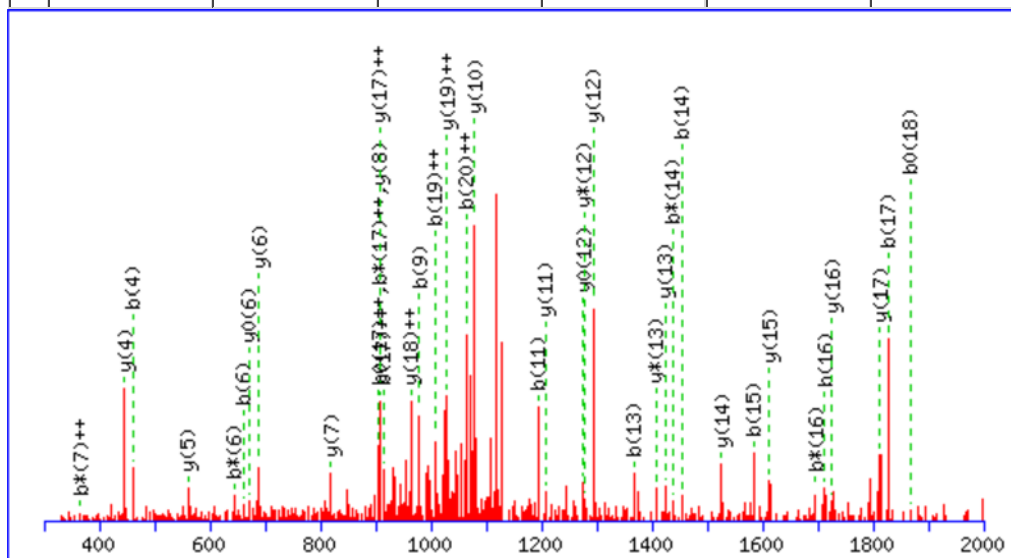

## Peptide View

MS/MS Fragmentation of **LLIYDASNLETGVPSR**Found in **IPI00003111**, Tax\_Id=9606 Gene\_Symbol=LOC652694 Ig kappa chain V-I region AU**Experiment:** 43 - OPE-1 **Fraction:** OPE-1

Match to Query 12169: 1746.917648 from(874.466100,2+)

Title: OECHL100310\_39.16395.16395.2.dta

Data file \\BOROMIR\Masse\Data LTQ-Orbitrap\Chrystelle Lacroix\Etude clinique sJPU\OECHL100310\_39.raw

**Monoisotopic mass of neutral peptide Mr(calc):** 1746.915192**Fixed modifications:** Carbamidomethyl (C) (apply to specified residues or termini only)**Ions Score:** 72**Expect:** 5.6e-006**Matches :** 21/156 fragment ions using 30 most intense peaks ([help](#))

| #  | b                  | b <sup>++</sup>   | b*                | b <sup>*++</sup> | b <sup>0</sup> | b <sup>0++</sup> | Seq. | y                  | y <sup>++</sup> | y*                | y <sup>*++</sup> | y <sup>0</sup>     | y <sup>0++</sup> | #  |
|----|--------------------|-------------------|-------------------|------------------|----------------|------------------|------|--------------------|-----------------|-------------------|------------------|--------------------|------------------|----|
| 1  | 114.091340         | 57.549308         |                   |                  |                |                  | L    |                    |                 |                   |                  |                    |                  | 16 |
| 2  | 227.175404         | 114.091340        |                   |                  |                |                  | L    | 1634.838427        | 817.922852      | 1617.811878       | 809.409577       | 1616.827862        | 808.917569       | 15 |
| 3  | 340.259468         | 170.633372        |                   |                  |                |                  | I    | <b>1521.754363</b> | 761.380820      | 1504.727814       | 752.867545       | 1503.743798        | 752.375537       | 14 |
| 4  | 503.322797         | 252.165036        |                   |                  |                |                  | Y    | 1408.670299        | 704.838788      | 1391.643750       | 696.325513       | <b>1390.659734</b> | 695.833505       | 13 |
| 5  | 618.349740         | 309.678508        |                   |                  | 600.339175     | 300.673226       | D    | <b>1245.606970</b> | 623.307123      | 1228.580421       | 614.793849       | 1227.596405        | 614.301841       | 12 |
| 6  | <b>689.386854</b>  | 345.197065        |                   |                  | 671.376289     | 336.191782       | A    | 1130.580027        | 565.793652      | 1113.553478       | 557.280377       | 1112.569462        | 556.788369       | 11 |
| 7  | 776.418882         | 388.713079        |                   |                  | 758.408317     | 379.707796       | S    | <b>1059.542913</b> | 530.275095      | 1042.516364       | 521.761820       | 1041.532348        | 521.269812       | 10 |
| 8  | 890.461809         | 445.734542        | <b>873.435260</b> | 437.221268       | 872.451244     | 436.729260       | N    | <b>972.510885</b>  | 486.759081      | 955.484336        | 478.245806       | 954.500320         | 477.753798       | 9  |
| 9  | <b>1003.545873</b> | 502.276574        | 986.519324        | 493.763300       | 985.535308     | 493.271292       | L    | 858.467958         | 429.737617      | 841.441409        | 421.224343       | 840.457393         | 420.732335       | 8  |
| 10 | <b>1132.588466</b> | 566.797871        | 1115.561917       | 558.284597       | 1114.577901    | 557.792588       | E    | <b>745.383894</b>  | 373.195585      | 728.357345        | 364.682311       | 727.373329         | 364.190303       | 7  |
| 11 | <b>1233.636145</b> | <b>617.321710</b> | 1216.609596       | 608.808436       | 1215.625580    | 608.316428       | T    | <b>616.341301</b>  | 308.674289      | 599.314752        | 300.161014       | 598.330736         | 299.669006       | 6  |
| 12 | <b>1290.657609</b> | 645.832442        | 1273.631060       | 637.319168       | 1272.647044    | 636.827160       | G    | <b>515.293622</b>  | 258.150449      | 498.267073        | 249.637175       | 497.283057         | 249.145167       | 5  |
| 13 | <b>1389.726023</b> | 695.366649        | 1372.699474       | 686.853375       | 1371.715458    | 686.361367       | V    | <b>458.272158</b>  | 229.639717      | 441.245609        | 221.126443       | 440.261593         | 220.634435       | 4  |
| 14 | <b>1486.778787</b> | 743.893032        | 1469.752238       | 735.379757       | 1468.768222    | 734.887749       | P    | <b>359.203744</b>  | 180.105510      | <b>342.177195</b> | 171.592236       | 341.193179         | 171.100228       | 3  |
| 15 | <b>1573.810815</b> | 787.409046        | 1556.784266       | 778.895771       | 1555.800250    | 778.403763       | S    | 262.150980         | 131.579128      | 245.124431        | 123.065854       | 244.140415         | 122.573846       | 2  |
| 16 |                    |                   |                   |                  |                |                  | R    | 175.118952         | 88.063114       | 158.092403        | 79.549839        |                    |                  | 1  |

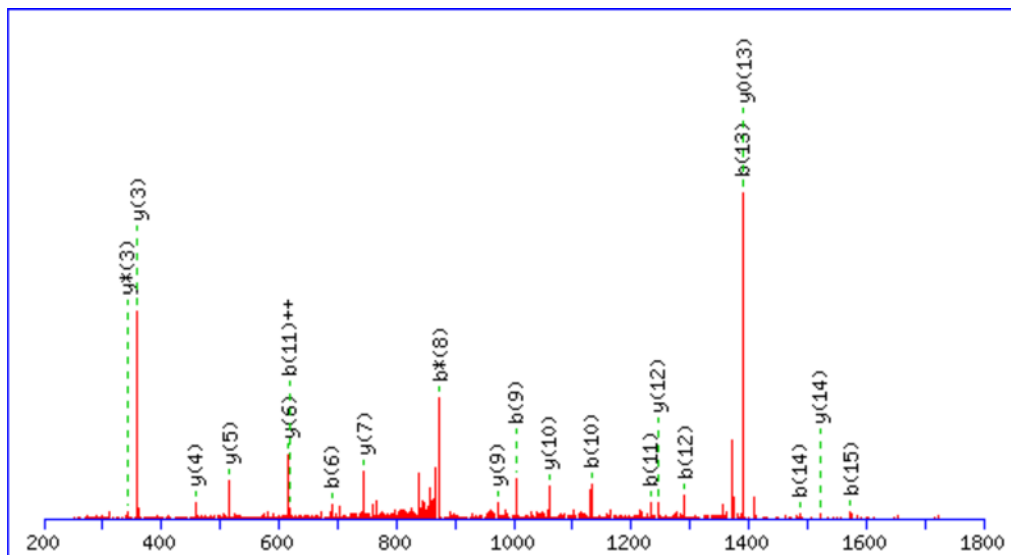

## Peptide View

MS/MS Fragmentation of **KAGPCEQAGSPCR**

Found in **IP100028381**, Tax\_Id=9606 Gene\_Symbol=DLK2 Isoform 1 of Protein delta homolog 2

**Experiment:** 43 - OPE-1 **Fraction:** OPE-1

Match to Query 8600: 1416.624248 from(709.319400,2+)

Title: OECHL100310\_39.1963.1963.2.dta

Data file \\BOROMIR\Masse\Data LTQ-Orbitrap\Chrystelle Lacroix\Etude clinique sJPU\OECHL100310\_39.raw

**Monoisotopic mass of neutral peptide Mr(calc):** 1416.623810 **Fixed modifications:** Carbamidomethyl (C) (apply to specified residues or termini only) **Ions Score:** 88

**Expect:** 9.8e-008 **Matches :** 22/128 fragment ions using 37 most intense peaks ([help](#))

| # | b          | b <sup>++</sup> | b <sup>*</sup> | b <sup>*++</sup> | b <sup>0</sup> | b <sup>0++</sup> | Seq.     | y                  | y <sup>++</sup>   | y <sup>*</sup>     | y <sup>*++</sup> | y <sup>0</sup> | y <sup>0++</sup> | #         |
|---|------------|-----------------|----------------|------------------|----------------|------------------|----------|--------------------|-------------------|--------------------|------------------|----------------|------------------|-----------|
| 1 | 129.102239 | 65.054757       | 112.075690     | 56.541483        |                |                  | <b>K</b> |                    |                   |                    |                  |                |                  | <b>13</b> |
| 2 | 200.139353 | 100.573315      | 183.112804     | 92.060040        |                |                  | <b>A</b> | <b>1289.536133</b> | <b>645.271705</b> | 1272.509584        | 636.758430       | 1271.525568    | 636.266422       | <b>12</b> |
| 3 | 257.160817 | 129.084047      | 240.134268     | 120.570772       |                |                  | <b>G</b> | <b>1218.499019</b> | <b>609.753148</b> | 1201.472470        | 601.239873       | 1200.488454    | 600.747865       | <b>11</b> |
| 4 | 354.213581 | 177.610429      | 337.187032     | 169.097154       |                |                  | <b>P</b> | <b>1161.477555</b> | <b>581.242416</b> | 1144.451006        | 572.729141       | 1143.466990    | 572.237133       | <b>10</b> |
| 5 | 514.244230 | 257.625753      | 497.217681     | 249.112479       |                |                  | <b>C</b> | <b>1064.424791</b> | 532.716034        | <b>1047.398242</b> | 524.202759       | 1046.414226    | 523.710751       | <b>9</b>  |
| 6 | 643.286823 | 322.147050      | 626.260274     | 313.633775       | 625.276258     | 313.141767       | <b>E</b> | <b>904.394142</b>  | 452.700709        | 887.367593         | 444.187434       | 886.383577     | 443.695427       | <b>8</b>  |



|    |             |            |             |            |             |            |   |            |            |            |            |            |            |   |
|----|-------------|------------|-------------|------------|-------------|------------|---|------------|------------|------------|------------|------------|------------|---|
| 7  | 771.345401  | 386.176339 | 754.318852  | 377.663064 | 753.334836  | 377.171056 | Q | 775.351549 | 388.179413 | 758.325000 | 379.666138 | 757.340984 | 379.174130 | 7 |
| 8  | 842.382515  | 421.694896 | 825.355966  | 413.181621 | 824.371950  | 412.689613 | A | 647.292971 | 324.150124 | 630.266422 | 315.636849 | 629.282406 | 315.144841 | 6 |
| 9  | 899.403979  | 450.205628 | 882.377430  | 441.692353 | 881.393414  | 441.200345 | G | 576.255857 | 288.631567 | 559.229308 | 280.118292 | 558.245292 | 279.626284 | 5 |
| 10 | 986.436007  | 493.721642 | 969.409458  | 485.208367 | 968.425442  | 484.716359 | S | 519.234393 | 260.120835 | 502.207844 | 251.607560 | 501.223828 | 251.115552 | 4 |
| 11 | 1083.488771 | 542.248024 | 1066.462222 | 533.734749 | 1065.478206 | 533.242741 | P | 432.202365 | 216.604820 | 415.175816 | 208.091546 |            |            | 3 |
| 12 | 1243.519420 | 622.263348 | 1226.492871 | 613.750074 | 1225.508855 | 613.258066 | C | 335.149601 | 168.078438 | 318.123052 | 159.565164 |            |            | 2 |
| 13 |             |            |             |            |             |            | R | 175.118952 | 88.063114  | 158.092403 | 79.549839  |            |            | 1 |

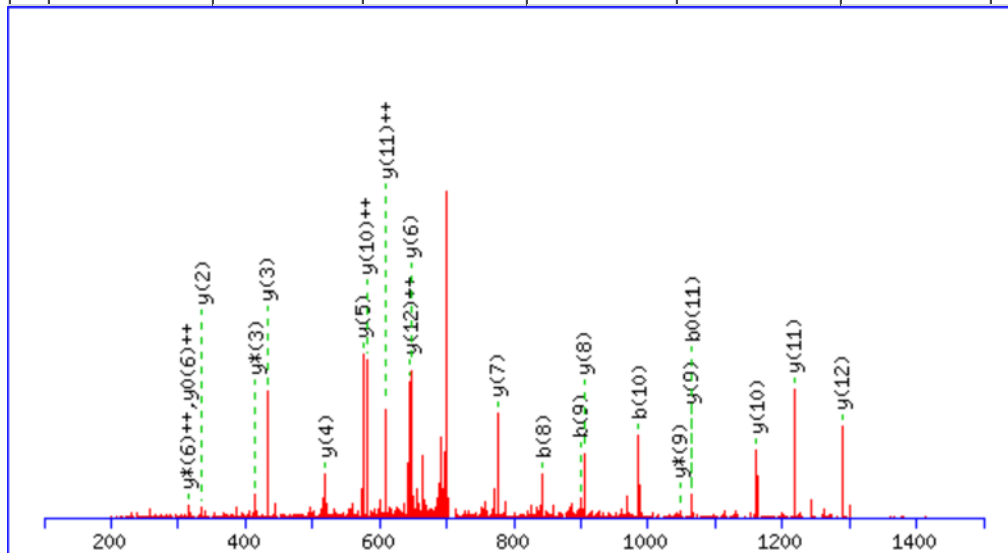

## Peptide View

MS/MS Fragmentation of **YSGSEGSTQTLTKGELK**

Found in **IPI00017526**, Tax\_Id=9606 Gene\_Symbol=S100P Protein S100-P

**Experiment:** 43 - OPE-1 **Fraction:** OPE-1

Match to Query 12510: 1784.879448 from(893.447000,2+)

Title: OECHL100310\_39.7441.7441.2.dta

Data file \\BOROMIR\Masse\Data LTQ-Orbitrap\Chrystelle Lacroix\Etude clinique sJPU\OECHL100310\_39.raw

**Monoisotopic mass of neutral peptide Mr(calc):** 1784.879211 **Fixed modifications:** Carbamidomethyl (C) (apply to specified residues or termini only) **Ions Score:** 67

**Expect:** 3.1e-005 **Matches :** 17/170 fragment ions using 31 most intense peaks ([help](#))

| #  | <b>b</b>           | <b>b<sup>++</sup></b> | <b>b*</b>   | <b>b<sup>*++</sup></b> | <b>b<sup>0</sup></b> | <b>b<sup>0++</sup></b> | Seq.     | <b>y</b>           | <b>y<sup>++</sup></b> | <b>y*</b>          | <b>y<sup>*++</sup></b> | <b>y<sup>0</sup></b> | <b>y<sup>0++</sup></b> | #  |
|----|--------------------|-----------------------|-------------|------------------------|----------------------|------------------------|----------|--------------------|-----------------------|--------------------|------------------------|----------------------|------------------------|----|
| 1  | 164.070605         | 82.538940             |             |                        |                      |                        | <b>Y</b> |                    |                       |                    |                        |                      |                        | 17 |
| 2  | 251.102633         | 126.054954            |             |                        | 233.092068           | 117.049672             | <b>S</b> | 1622.823172        | 811.915224            | 1605.796623        | 803.401950             | 1604.812607          | 802.909941             | 16 |
| 3  | 308.124097         | 154.565687            |             |                        | 290.113532           | 145.560404             | <b>G</b> | 1535.791144        | <b>768.399210</b>     | 1518.764595        | 759.885936             | 1517.780579          | 759.393928             | 15 |
| 4  | 395.156125         | 198.081701            |             |                        | 377.145560           | 189.076418             | <b>S</b> | 1478.769680        | 739.888478            | 1461.743131        | 731.375204             | 1460.759115          | 730.883195             | 14 |
| 5  | 524.198718         | 262.602997            |             |                        | 506.188153           | 253.597715             | <b>E</b> | <b>1391.737652</b> | 696.372464            | 1374.711103        | 687.859190             | 1373.727087          | 687.367182             | 13 |
| 6  | 581.220182         | 291.113729            |             |                        | 563.209617           | 282.108447             | <b>G</b> | <b>1262.695059</b> | <b>631.851167</b>     | 1245.668510        | 623.337893             | 1244.684494          | 622.845885             | 12 |
| 7  | 668.252210         | 334.629743            |             |                        | 650.241645           | 325.624461             | <b>S</b> | <b>1205.673595</b> | 603.340436            | 1188.647046        | 594.827161             | 1187.663030          | 594.335153             | 11 |
| 8  | 769.299889         | 385.153583            |             |                        | 751.289324           | 376.148300             | <b>T</b> | <b>1118.641567</b> | 559.824421            | 1101.615018        | 551.311147             | 1100.631002          | 550.819139             | 10 |
| 9  | 897.358467         | 449.182872            | 880.331918  | 440.669597             | 879.347902           | 440.177589             | <b>Q</b> | <b>1017.593888</b> | 509.300582            | <b>1000.567339</b> | 500.787307             | 999.583323           | 500.295299             | 9  |
| 10 | 998.406146         | 499.706711            | 981.379597  | 491.193437             | 980.395581           | 490.701429             | <b>T</b> | 889.535310         | 445.271293            | 872.508761         | 436.758018             | 871.524745           | <b>436.266010</b>      | 8  |
| 11 | 1111.490210        | 556.248743            | 1094.463661 | 547.735469             | 1093.479645          | 547.243461             | <b>L</b> | <b>788.487631</b>  | 394.747453            | 771.461082         | 386.234179             | 770.477066           | 385.742171             | 7  |
| 12 | 1212.537889        | 606.772583            | 1195.511340 | 598.259308             | 1194.527324          | 597.767300             | <b>T</b> | <b>675.403567</b>  | 338.205421            | 658.377018         | 329.692147             | 657.393002           | 329.200139             | 6  |
| 13 | 1340.632852        | 670.820064            | 1323.606303 | 662.306790             | 1322.622287          | 661.814782             | <b>K</b> | <b>574.355888</b>  | 287.681582            | 557.329339         | 279.168307             | 556.345323           | 278.676299             | 5  |
| 14 | <b>1397.654316</b> | 699.330796            | 1380.627767 | 690.817522             | 1379.643751          | 690.325514             | <b>G</b> | <b>446.260925</b>  | 223.634100            | 429.234376         | 215.120826             | 428.250360           | 214.628818             | 4  |
| 15 | <b>1526.696909</b> | 763.852093            | 1509.670360 | 755.338818             | 1508.686344          | 754.846810             | <b>E</b> | 389.239461         | 195.123368            | 372.212912         | 186.610094             | 371.228896           | 186.118086             | 3  |
| 16 | <b>1639.780973</b> | 820.394124            | 1622.754424 | 811.880850             | 1621.770408          | 811.388842             | <b>L</b> | <b>260.196868</b>  | 130.602072            | 243.170319         | 122.088797             |                      |                        | 2  |
| 17 |                    |                       |             |                        |                      |                        | <b>K</b> | 147.112804         | 74.060040             | 130.086255         | 65.546765              |                      |                        | 1  |

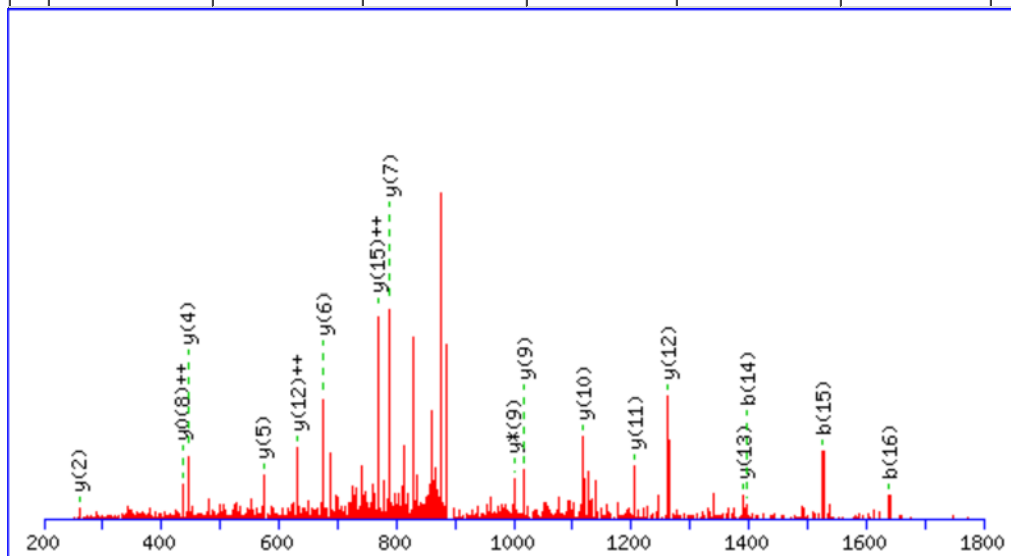

## Peptide View

MS/MS Fragmentation of **ATGDIKVTSEIK**

Found in **IP100302614**, Tax\_Id=9606 Gene\_Symbol=VTCN1 V-set domain containing T cell activation inhibitor 1

**Experiment:** 43 - OPE-1 **Fraction:** OPE-1

Match to Query 8385: 1389.735648 from(695.875100,2+)

Title: OECHL100310\_39.8000.8000.2.dta

Data file \\BOROMIR\Masse\Data LTQ-Orbitrap\Chrystelle Lacroix\Etude clinique sJPU\OECHL100310\_39.raw

**Monoisotopic mass of neutral peptide Mr(calc):** 1389.735107 **Fixed modifications:** Carbamidomethyl (C) (apply to specified residues or termini only) **Ions Score:** 54

**Expect:** 0.0004 **Matches :** 39/128 fragment ions using 69 most intense peaks ([help](#))

| #  | b           | b <sup>++</sup> | b <sup>*</sup> | b <sup>*++</sup> | b <sup>0</sup> | b <sup>0++</sup> | Seq. | y           | y <sup>++</sup> | y <sup>*</sup> | y <sup>*++</sup> | y <sup>0</sup> | y <sup>0++</sup> | #  |
|----|-------------|-----------------|----------------|------------------|----------------|------------------|------|-------------|-----------------|----------------|------------------|----------------|------------------|----|
| 1  | 72.044390   | 36.525833       |                |                  |                |                  | A    |             |                 |                |                  |                |                  | 13 |
| 2  | 173.092069  | 87.049672       |                |                  | 155.081504     | 78.044390        | T    | 1319.705288 | 660.356282      | 1302.678739    | 651.843008       | 1301.694723    | 651.350999       | 12 |
| 3  | 230.113533  | 115.560404      |                |                  | 212.102968     | 106.555122       | G    | 1218.657609 | 609.832442      | 1201.631060    | 601.319168       | 1200.647044    | 600.827160       | 11 |
| 4  | 345.140476  | 173.073876      |                |                  | 327.129911     | 164.068593       | D    | 1161.636145 | 581.321710      | 1144.609596    | 572.808436       | 1143.625580    | 572.316428       | 10 |
| 5  | 458.224540  | 229.615908      |                |                  | 440.213975     | 220.610626       | I    | 1046.609202 | 523.808239      | 1029.582653    | 515.294964       | 1028.598637    | 514.802956       | 9  |
| 6  | 586.319503  | 293.663390      | 569.292954     | 285.150115       | 568.308938     | 284.658107       | K    | 933.525138  | 467.266207      | 916.498589     | 458.752932       | 915.514573     | 458.260924       | 8  |
| 7  | 685.387917  | 343.197597      | 668.361368     | 334.684322       | 667.377352     | 334.192314       | V    | 805.430175  | 403.218725      | 788.403626     | 394.705451       | 787.419610     | 394.213443       | 7  |
| 8  | 786.435596  | 393.721436      | 769.409047     | 385.208162       | 768.425031     | 384.716154       | T    | 706.361761  | 353.684518      | 689.335212     | 345.171244       | 688.351196     | 344.679236       | 6  |
| 9  | 915.478189  | 458.242733      | 898.451640     | 449.729458       | 897.467624     | 449.237450       | E    | 605.314082  | 303.160679      | 588.287533     | 294.647404       | 587.303517     | 294.155396       | 5  |
| 10 | 1002.510217 | 501.758747      | 985.483668     | 493.245472       | 984.499652     | 492.753464       | S    | 476.271489  | 238.639382      | 459.244940     | 230.126108       | 458.260924     | 229.634100       | 4  |
| 11 | 1131.552810 | 566.280043      | 1114.526261    | 557.766769       | 1113.542245    | 557.274760       | E    | 389.239461  | 195.123368      | 372.212912     | 186.610094       | 371.228896     | 186.118086       | 3  |
| 12 | 1244.636874 | 622.822075      | 1227.610325    | 614.308800       | 1226.626309    | 613.816792       | I    | 260.196868  | 130.602072      | 243.170319     | 122.088797       |                |                  | 2  |
| 13 |             |                 |                |                  |                |                  | K    | 147.112804  | 74.060040       | 130.086255     | 65.546765        |                |                  | 1  |

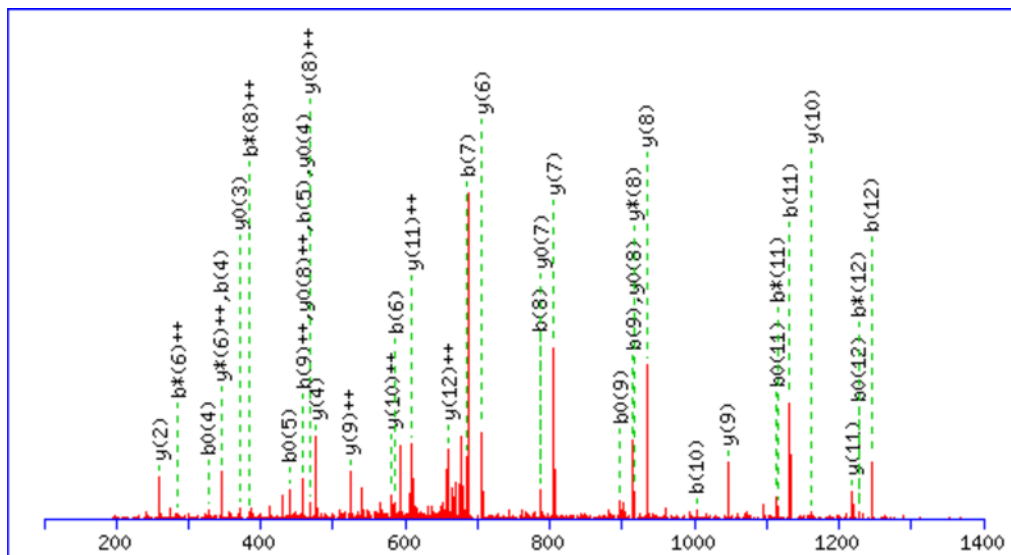

## Peptide View

MS/MS Fragmentation of **LYQQHGAGLFDVTR**

Found in **IPI00554538**, Tax\_Id=9606 Gene\_Symbol=TPP1 Putative uncharacterized protein TPP1

**Experiment:** 43 - OPE-1 **Fraction:** OPE-1

Match to Query 10745: 1603.810648 from(802.912600,2+)

Title: OECHL100310\_39.13413.13413.2.dta

Data file \\BOROMIR\Masse\Data LTQ-Orbitrap\Chrystelle Lacroix\Etude clinique sJPU\OECHL100310\_39.raw

**Monoisotopic mass of neutral peptide Mr(calc):** 1603.810699 **Fixed modifications:** Carbamidomethyl (C) (apply to specified residues or termini only) **Ions Score:** 52

**Expect:** 0.00093 **Matches :** 24/130 fragment ions using 42 most intense peaks ([help](#))

| # | b                 | b <sup>++</sup> | b <sup>*</sup> | b <sup>*++</sup> | b <sup>0</sup> | b <sup>0++</sup> | Seq.     | y                  | y <sup>++</sup>   | y <sup>*</sup>     | y <sup>*++</sup>  | y <sup>0</sup> | y <sup>0++</sup>  | #         |
|---|-------------------|-----------------|----------------|------------------|----------------|------------------|----------|--------------------|-------------------|--------------------|-------------------|----------------|-------------------|-----------|
| 1 | 114.091340        | 57.549308       |                |                  |                |                  | <b>L</b> |                    |                   |                    |                   |                |                   | <b>14</b> |
| 2 | <b>277.154669</b> | 139.080973      |                |                  |                |                  | <b>Y</b> | 1491.733905        | 746.370591        | 1474.707356        | 737.857316        | 1473.723340    | 737.365308        | <b>13</b> |
| 3 | <b>405.213247</b> | 203.110262      | 388.186698     | 194.596987       |                |                  | <b>Q</b> | 1328.670576        | 664.838926        | 1311.644027        | <b>656.325652</b> | 1310.660011    | <b>655.833644</b> | <b>12</b> |
| 4 | <b>533.271825</b> | 267.139551      | 516.245276     | 258.626276       |                |                  | <b>Q</b> | <b>1200.611998</b> | 600.809637        | <b>1183.585449</b> | <b>592.296363</b> | 1182.601433    | 591.804355        | <b>11</b> |
| 5 | <b>670.330737</b> | 335.669007      | 653.304188     | 327.155732       |                |                  | <b>H</b> | <b>1072.553420</b> | <b>536.780348</b> | 1055.526871        | 528.267074        | 1054.542855    | 527.775066        | <b>10</b> |
| 6 | 727.352201        | 364.179739      | 710.325652     | 355.666464       |                |                  | <b>G</b> | <b>935.494508</b>  | 468.250892        | 918.467959         | 459.737618        | 917.483943     | 459.245610        | <b>9</b>  |

|    |                    |            |             |                   |             |                   |          |                   |                   |            |            |                   |            |          |
|----|--------------------|------------|-------------|-------------------|-------------|-------------------|----------|-------------------|-------------------|------------|------------|-------------------|------------|----------|
| 7  | 798.389315         | 399.698296 | 781.362766  | 391.185021        |             |                   | <b>A</b> | <b>878.473044</b> | 439.740160        | 861.446495 | 431.226886 | 860.462479        | 430.734878 | <b>8</b> |
| 8  | 855.410779         | 428.209028 | 838.384230  | 419.695753        |             |                   | <b>G</b> | 807.435930        | 404.221603        | 790.409381 | 395.708329 | 789.425365        | 395.216321 | <b>7</b> |
| 9  | <b>968.494843</b>  | 484.751060 | 951.468294  | 476.237785        |             |                   | <b>L</b> | 750.414466        | <b>375.710871</b> | 733.387917 | 367.197597 | 732.403901        | 366.705589 | <b>6</b> |
| 10 | <b>1115.563257</b> | 558.285267 | 1098.536708 | 549.771992        |             |                   | <b>F</b> | 637.330402        | 319.168839        | 620.303853 | 310.655565 | 619.319837        | 310.163557 | <b>5</b> |
| 11 | <b>1230.590200</b> | 615.798738 | 1213.563651 | 607.285464        | 1212.579635 | 606.793456        | <b>D</b> | <b>490.261988</b> | 245.634632        | 473.235439 | 237.121358 | <b>472.251423</b> | 236.629350 | <b>4</b> |
| 12 | <b>1329.658614</b> | 665.332945 | 1312.632065 | <b>656.819671</b> | 1311.648049 | <b>656.327663</b> | <b>V</b> | <b>375.235045</b> | 188.121161        | 358.208496 | 179.607886 | 357.224480        | 179.115878 | <b>3</b> |
| 13 | <b>1430.706293</b> | 715.856785 | 1413.679744 | 707.343510        | 1412.695728 | 706.851502        | <b>T</b> | 276.166631        | 138.586953        | 259.140082 | 130.073679 | 258.156066        | 129.581671 | <b>2</b> |
| 14 |                    |            |             |                   |             |                   | <b>R</b> | 175.118952        | 88.063114         | 158.092403 | 79.549839  |                   |            | <b>1</b> |

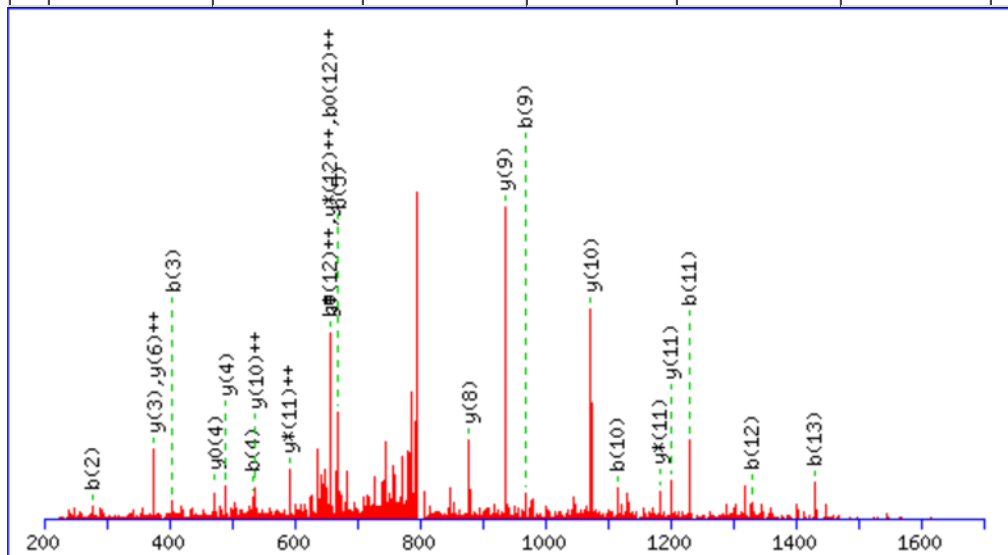

## Peptide View

MS/MS Fragmentation of **SNVSDAVAQSTR**

Found in **IP100465028**, Tax\_Id=9606 Gene\_Symbol=RCTPI1;TPI1 triosephosphate isomerase 1 isoform 2

**Experiment:** 43 - OPE-1 **Fraction:** OPE-1

Match to Query 6441: 1233.596048 from(617.805300,2+)

Title: OECHL100310\_39.5646.5646.2.dta

Data file \\BOROMIR\Masse\Data LTQ-Orbitrap\Chrystelle Lacroix\Etude clinique sJPU\OECHL100310\_39.raw

**Monoisotopic mass of neutral peptide Mr(calc):** 1233.594940 **Fixed modifications:** Carbamidomethyl (C) (apply to specified residues or termini only) **Ions Score:** 49

**Expect:** 0.0011**Matches :** 14/128 fragment ions using 31 most intense peaks ([help](#))

| #  | b                 | b <sup>++</sup> | b*          | b <sup>*++</sup> | b <sup>0</sup> | b <sup>0++</sup> | Seq. | y                  | y <sup>++</sup> | y*          | y <sup>*++</sup> | y <sup>0</sup> | y <sup>0++</sup> | #  |
|----|-------------------|-----------------|-------------|------------------|----------------|------------------|------|--------------------|-----------------|-------------|------------------|----------------|------------------|----|
| 1  | 88.039304         | 44.523290       |             |                  | 70.028739      | 35.518008        | S    |                    |                 |             |                  |                |                  | 12 |
| 2  | <b>202.082231</b> | 101.544753      | 185.055682  | 93.031479        | 184.071666     | 92.539471        | N    | 1147.570191        | 574.288733      | 1130.543642 | 565.775459       | 1129.559626    | 565.283451       | 11 |
| 3  | <b>301.150645</b> | 151.078960      | 284.124096  | 142.565686       | 283.140080     | 142.073678       | V    | <b>1033.527264</b> | 517.267270      | 1016.500715 | 508.753995       | 1015.516699    | 508.261987       | 10 |
| 4  | 388.182673        | 194.594974      | 371.156124  | 186.081700       | 370.172108     | 185.589692       | S    | <b>934.458850</b>  | 467.733063      | 917.432301  | 459.219788       | 916.448285     | 458.727780       | 9  |
| 5  | 503.209616        | 252.108446      | 486.183067  | 243.595171       | 485.199051     | 243.103163       | D    | <b>847.426822</b>  | 424.217049      | 830.400273  | 415.703774       | 829.416257     | 415.211766       | 8  |
| 6  | 574.246730        | 287.627003      | 557.220181  | 279.113729       | 556.236165     | 278.621721       | A    | <b>732.399879</b>  | 366.703577      | 715.373330  | 358.190303       | 714.389314     | 357.698295       | 7  |
| 7  | <b>673.315144</b> | 337.161210      | 656.288595  | 328.647936       | 655.304579     | 328.155928       | V    | 661.362765         | 331.185020      | 644.336216  | 322.671746       | 643.352200     | 322.179738       | 6  |
| 8  | <b>744.352258</b> | 372.679767      | 727.325709  | 364.166493       | 726.341693     | 363.674485       | A    | <b>562.294351</b>  | 281.650813      | 545.267802  | 273.137539       | 544.283786     | 272.645531       | 5  |
| 9  | <b>872.410836</b> | 436.709056      | 855.384287  | 428.195782       | 854.400271     | 427.703774       | Q    | <b>491.257237</b>  | 246.132256      | 474.230688  | 237.618982       | 473.246672     | 237.126974       | 4  |
| 10 | 959.442864        | 480.225070      | 942.416315  | 471.711795       | 941.432299     | 471.219788       | S    | <b>363.198659</b>  | 182.102967      | 346.172110  | 173.589693       | 345.188094     | 173.097685       | 3  |
| 11 | 1060.490543       | 530.748909      | 1043.463994 | 522.235635       | 1042.479978    | 521.743627       | T    | <b>276.166631</b>  | 138.586953      | 259.140082  | 130.073679       | 258.156066     | 129.581671       | 2  |
| 12 |                   |                 |             |                  |                |                  | R    | 175.118952         | 88.063114       | 158.092403  | 79.549839        |                |                  | 1  |

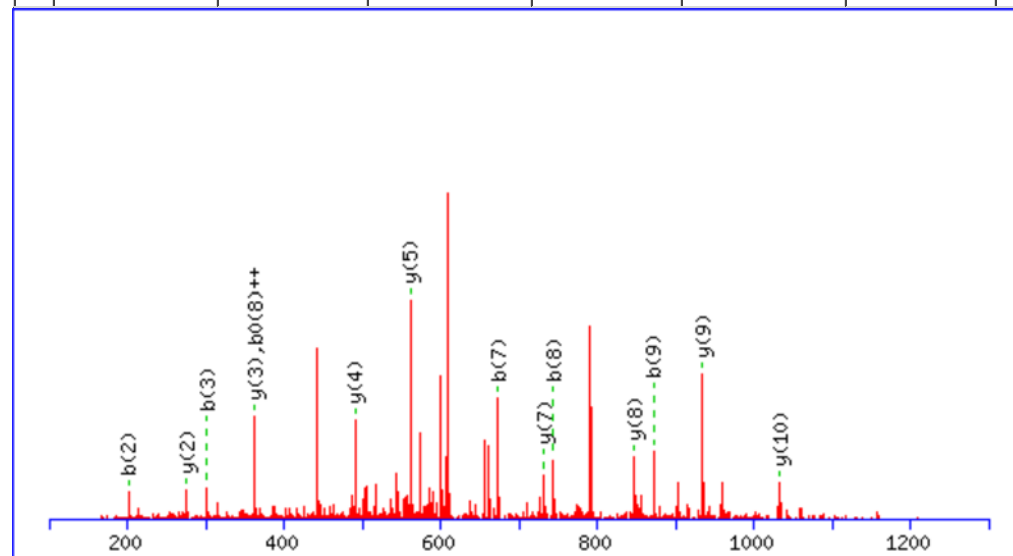

## Peptide View

MS/MS Fragmentation of **NPVLQQDAHSSVTTPQR**Found in **IPI00410488**, Tax\_Id=9606 Gene\_Symbol=CD276 Isoform 1 of CD276 antigen**Experiment:** 43 - OPE-1 **Fraction:** OPE-1

Match to Query 13725: 1990.027848 from(996.021200,2+)

Title: OECHL100310\_39.9430.9430.2.dta

Data file \\BOROMIR\Masse\Data LTQ-Orbitrap\Chrystelle Lacroix\Etude clinique sJPU\OECHL100310\_39.raw

**Monoisotopic mass of neutral peptide Mr(calc):** 1990.023209**Fixed modifications:** Carbamidomethyl (C) (apply to specified residues or termini only)**Ions Score:** 67**Expect:** 3e-005**Matches :** 31/186 fragment ions using 48 most intense peaks ([help](#))

| #  | b                  | b <sup>++</sup>   | b <sup>*</sup>     | b <sup>*++</sup>  | b <sup>0</sup>     | b <sup>0++</sup>  | Seq. | y                  | y <sup>++</sup>   | y <sup>*</sup>     | y <sup>*++</sup>  | y <sup>0</sup> | y <sup>0++</sup>  | #  |
|----|--------------------|-------------------|--------------------|-------------------|--------------------|-------------------|------|--------------------|-------------------|--------------------|-------------------|----------------|-------------------|----|
| 1  | 115.050203         | 58.028740         | 98.023654          | 49.515465         |                    |                   | N    |                    |                   |                    |                   |                |                   | 18 |
| 2  | 212.102967         | 106.555121        | 195.076418         | 98.041847         |                    |                   | P    | 1876.987553        | 938.997415        | 1859.961004        | 930.484140        | 1858.976988    | 929.992132        | 17 |
| 3  | <b>311.171381</b>  | 156.089328        | 294.144832         | 147.576054        |                    |                   | V    | <b>1779.934789</b> | 890.471033        | 1762.908240        | 881.957758        | 1761.924224    | 881.465750        | 16 |
| 4  | <b>424.255445</b>  | 212.631361        | 407.228896         | 204.118086        |                    |                   | L    | <b>1680.866375</b> | <b>840.936826</b> | 1663.839826        | 832.423551        | 1662.855810    | 831.931543        | 15 |
| 5  | 552.314023         | 276.660650        | <b>535.287474</b>  | 268.147375        |                    |                   | Q    | <b>1567.782311</b> | 784.394794        | 1550.755762        | <b>775.881519</b> | 1549.771746    | <b>775.389511</b> | 14 |
| 6  | <b>680.372601</b>  | 340.689939        | <b>663.346052</b>  | 332.176664        |                    |                   | Q    | <b>1439.723733</b> | 720.365505        | 1422.697184        | 711.852230        | 1421.713168    | 711.360222        | 13 |
| 7  | 795.399544         | 398.203410        | 778.372995         | 389.690136        | 777.388979         | 389.198128        | D    | <b>1311.665155</b> | 656.336215        | <b>1294.638606</b> | 647.822941        | 1293.654590    | 647.330933        | 12 |
| 8  | 866.436658         | 433.721967        | 849.410109         | 425.208693        | 848.426093         | <b>424.716685</b> | A    | <b>1196.638212</b> | 598.822744        | 1179.611663        | 590.309470        | 1178.627647    | 589.817462        | 11 |
| 9  | 1003.495570        | <b>502.251423</b> | 986.469021         | 493.738149        | 985.485005         | 493.246141        | H    | <b>1125.601098</b> | 563.304187        | 1108.574549        | 554.790913        | 1107.590533    | 554.298905        | 10 |
| 10 | <b>1090.527598</b> | 545.767437        | 1073.501049        | 537.254163        | 1072.517033        | 536.762155        | S    | <b>988.542186</b>  | 494.774731        | 971.515637         | 486.261457        | 970.531621     | 485.769449        | 9  |
| 11 | 1177.559626        | 589.283451        | 1160.533077        | 580.770177        | 1159.549061        | 580.278169        | S    | 901.510158         | 451.258717        | 884.483609         | 442.745443        | 883.499593     | 442.253435        | 8  |
| 12 | <b>1276.628040</b> | 638.817658        | 1259.601491        | 630.304384        | 1258.617475        | 629.812376        | V    | 814.478130         | 407.742703        | 797.451581         | 399.229428        | 796.467565     | 398.737420        | 7  |
| 13 | 1377.675719        | 689.341498        | 1360.649170        | <b>680.828223</b> | 1359.665154        | <b>680.336215</b> | T    | <b>715.409716</b>  | 358.208496        | 698.383167         | 349.695221        | 697.399151     | 349.203213        | 6  |
| 14 | <b>1490.759783</b> | 745.883530        | <b>1473.733234</b> | 737.370255        | <b>1472.749218</b> | 736.878247        | I    | 614.362037         | 307.684656        | 597.335488         | 299.171382        | 596.351472     | 298.679374        | 5  |
| 15 | <b>1591.807462</b> | 796.407369        | 1574.780913        | 787.894095        | 1573.796897        | 787.402087        | T    | <b>501.277973</b>  | 251.142624        | 484.251424         | 242.629350        | 483.267408     | 242.137342        | 4  |
| 16 | 1688.860226        | 844.933751        | 1671.833677        | 836.420477        | 1670.849661        | 835.928469        | P    | <b>400.230294</b>  | 200.618785        | 383.203745         | 192.105510        |                |                   | 3  |
| 17 | <b>1816.918804</b> | 908.963040        | 1799.892255        | 900.449766        | 1798.908239        | 899.957758        | Q    | 303.177530         | 152.092403        | 286.150981         | 143.579128        |                |                   | 2  |
| 18 |                    |                   |                    |                   |                    |                   | R    | 175.118952         | 88.063114         | 158.092403         | 79.549839         |                |                   | 1  |

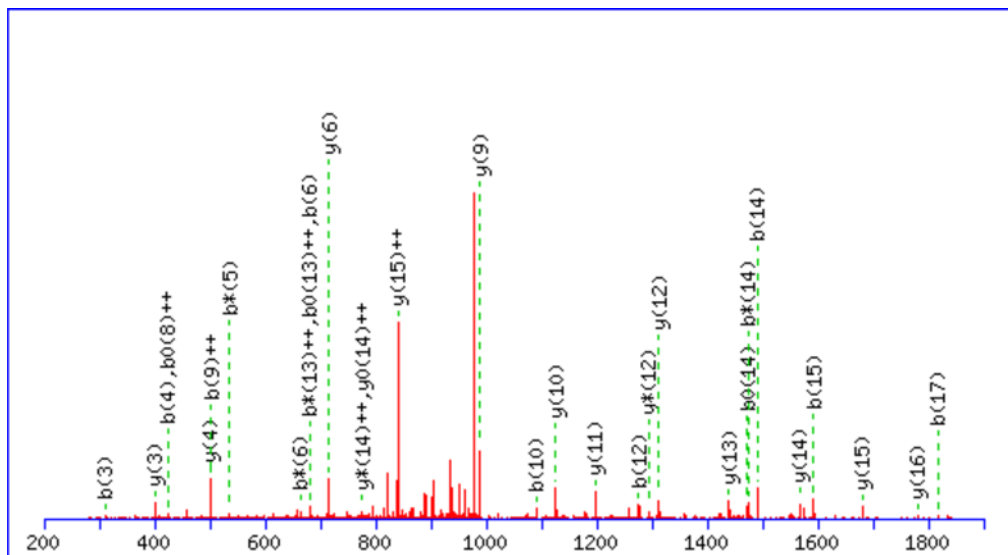

## Peptide View

MS/MS Fragmentation of **NIETIINTFHQYSVK**

Found in **IPI00027462**, Tax\_Id=9606 Gene\_Symbol=S100A9 Protein S100-A9

**Experiment:** 43 - OPE-1 **Fraction:** OPE-1

Match to Query 12630: 1805.932448 from(903.973500,2+)

Title: OECHL100310\_39.18847.18847.2.dta

Data file \\BOROMIR\Masse\Data LTQ-Orbitrap\Chrystelle Lacroix\Etude clinique sJPU\OECHL100310\_39.raw

**Monoisotopic mass of neutral peptide Mr(calc):** 1805.931183 **Fixed modifications:** Carbamidomethyl (C) (apply to specified residues or termini only) **Ions Score:** 63

**Expect:** 5.8e-005 **Matches :** 33/160 fragment ions using 46 most intense peaks ([help](#))

| # | b                 | b <sup>++</sup> | b*                | b <sup>*++</sup> | b <sup>0</sup>    | b <sup>0++</sup>  | Seq. | y                  | y <sup>++</sup>   | y*                 | y <sup>*++</sup> | y <sup>0</sup>     | y <sup>0++</sup> | #  |
|---|-------------------|-----------------|-------------------|------------------|-------------------|-------------------|------|--------------------|-------------------|--------------------|------------------|--------------------|------------------|----|
| 1 | 115.050203        | 58.028740       | 98.023654         | 49.515465        |                   |                   | N    |                    |                   |                    |                  |                    |                  | 15 |
| 2 | 228.134267        | 114.570771      | 211.107718        | 106.057497       |                   |                   | I    | 1692.895549        | 846.951413        | 1675.869000        | 838.438138       | 1674.884984        | 837.946130       | 14 |
| 3 | <b>357.176860</b> | 179.092068      | <b>340.150311</b> | 170.578793       | 339.166295        | 170.086785        | E    | <b>1579.811485</b> | <b>790.409381</b> | 1562.784936        | 781.896106       | <b>1561.800920</b> | 781.404098       | 13 |
| 4 | 458.224539        | 229.615907      | 441.197990        | 221.102633       | <b>440.213974</b> | 220.610625        | T    | <b>1450.768892</b> | <b>725.888084</b> | <b>1433.742343</b> | 717.374810       | 1432.758327        | 716.882802       | 12 |
| 5 | <b>571.308603</b> | 286.157940      | <b>554.282054</b> | 277.644665       | <b>553.298038</b> | 277.152657        | I    | <b>1349.721213</b> | 675.364245        | 1332.694664        | 666.850970       | 1331.710648        | 666.358962       | 11 |
| 6 | <b>684.392667</b> | 342.699972      | <b>667.366118</b> | 334.186697       | 666.382102        | <b>333.694689</b> | I    | <b>1236.637149</b> | 618.822213        | <b>1219.610600</b> | 610.308938       | 1218.626584        | 609.816930       | 10 |



|    |                    |            |             |            |             |            |   |                    |            |                    |                   |             |                   |   |
|----|--------------------|------------|-------------|------------|-------------|------------|---|--------------------|------------|--------------------|-------------------|-------------|-------------------|---|
| 7  | 798.435594         | 399.721435 | 781.409045  | 391.208161 | 780.425029  | 390.716153 | N | <b>1123.553085</b> | 562.280181 | <b>1106.526536</b> | 553.766906        | 1105.542520 | <b>553.274898</b> | 9 |
| 8  | 899.483273         | 450.245275 | 882.456724  | 441.732000 | 881.472708  | 441.239992 | T | <b>1009.510158</b> | 505.258717 | 992.483609         | <b>496.745443</b> | 991.499593  | <b>496.253435</b> | 8 |
| 9  | 1046.551687        | 523.779482 | 1029.525138 | 515.266207 | 1028.541122 | 514.774199 | F | 908.462479         | 454.734878 | 891.435930         | 446.221603        | 890.451914  | 445.729595        | 7 |
| 10 | 1183.610599        | 592.308938 | 1166.584050 | 583.795663 | 1165.600034 | 583.303655 | H | <b>761.394065</b>  | 381.200671 | 744.367516         | 372.687396        | 743.383500  | 372.195388        | 6 |
| 11 | <b>1311.669177</b> | 656.338227 | 1294.642628 | 647.824952 | 1293.658612 | 647.332944 | Q | <b>624.335153</b>  | 312.671215 | <b>607.308604</b>  | 304.157940        | 606.324588  | 303.665932        | 5 |
| 12 | <b>1474.732506</b> | 737.869891 | 1457.705957 | 729.356617 | 1456.721941 | 728.864609 | Y | <b>496.276575</b>  | 248.641926 | 479.250026         | 240.128651        | 478.266010  | 239.636643        | 4 |
| 13 | <b>1561.764534</b> | 781.385905 | 1544.737985 | 772.872631 | 1543.753969 | 772.380623 | S | <b>333.213246</b>  | 167.110261 | 316.186697         | 158.596987        | 315.202681  | 158.104979        | 3 |
| 14 | <b>1660.832948</b> | 830.920112 | 1643.806399 | 822.406838 | 1642.822383 | 821.914830 | V | 246.181218         | 123.594247 | 229.154669         | 115.080973        |             |                   | 2 |
| 15 |                    |            |             |            |             |            | K | 147.112804         | 74.060040  | 130.086255         | 65.546765         |             |                   | 1 |

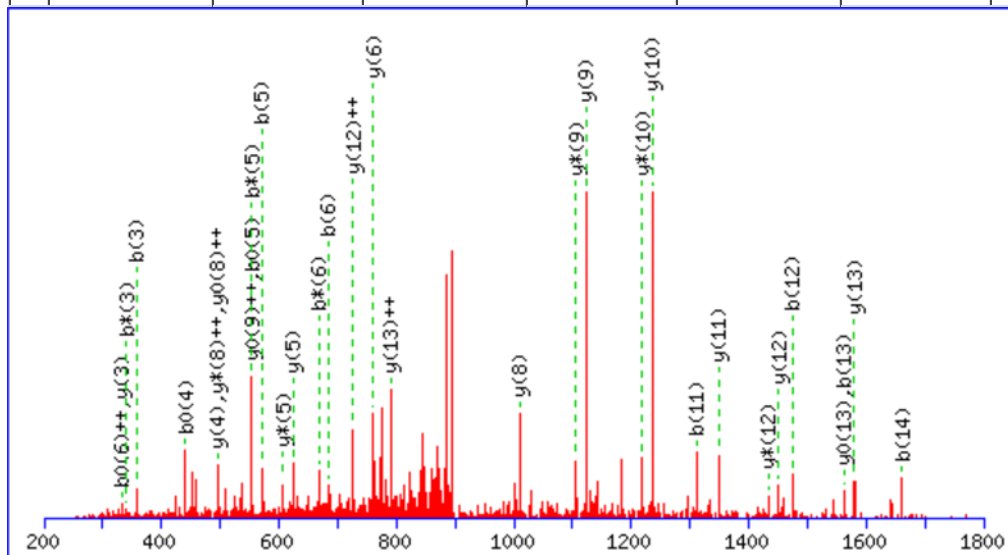

## Peptide View

MS/MS Fragmentation of **FSQEPADQTVVAGQR**

Found in **IP100470360**, Tax\_Id=9606 Gene\_Symbol=KIRREL Isoform 1 of Kin of IRRE-like protein 1

**Experiment:** 43 - OPE-1 **Fraction:** OPE-1

Match to Query 11001: 1631.789648 from(816.902100,2+)

Title: OECHL100310\_39.7824.7824.2.dta

Data file \\BOROMIR\Masse\Data LTQ-Orbitrap\Chrystelle Lacroix\Etude clinique sJPU\OECHL100310\_39.raw

**Monoisotopic mass of neutral peptide Mr(calc):** 1631.790359**Fixed modifications:** Carbamidomethyl (C) (apply to specified residues or termini only)**Ions Score:** 52

**Expect:** 0.00099**Matches :** 42/150 fragment ions using 112 most intense peaks ([help](#))

| #  | b           | b <sup>++</sup> | b*          | b <sup>*++</sup> | b <sup>0</sup> | b <sup>0++</sup> | Seq. | y           | y <sup>++</sup> | y*          | y <sup>*++</sup> | y <sup>0</sup> | y <sup>0++</sup> | #  |
|----|-------------|-----------------|-------------|------------------|----------------|------------------|------|-------------|-----------------|-------------|------------------|----------------|------------------|----|
| 1  | 148.075690  | 74.541483       |             |                  |                |                  | F    |             |                 |             |                  |                |                  | 15 |
| 2  | 235.107718  | 118.057497      |             |                  | 217.097153     | 109.052214       | S    | 1485.729213 | 743.368245      | 1468.702664 | 734.854970       | 1467.718648    | 734.362962       | 14 |
| 3  | 363.166296  | 182.086786      | 346.139747  | 173.573512       | 345.155731     | 173.081504       | Q    | 1398.697185 | 699.852231      | 1381.670636 | 691.338956       | 1380.686620    | 690.846948       | 13 |
| 4  | 492.208889  | 246.608082      | 475.182340  | 238.094808       | 474.198324     | 237.602800       | E    | 1270.638607 | 635.822942      | 1253.612058 | 627.309667       | 1252.628042    | 626.817659       | 12 |
| 5  | 589.261653  | 295.134465      | 572.235104  | 286.621190       | 571.251088     | 286.129182       | P    | 1141.596014 | 571.301645      | 1124.569465 | 562.788371       | 1123.585449    | 562.296363       | 11 |
| 6  | 660.298767  | 330.653022      | 643.272218  | 322.139747       | 642.288202     | 321.647739       | A    | 1044.543250 | 522.775263      | 1027.516701 | 514.261989       | 1026.532685    | 513.769981       | 10 |
| 7  | 775.325710  | 388.166493      | 758.299161  | 379.653218       | 757.315145     | 379.161210       | D    | 973.506136  | 487.256706      | 956.479587  | 478.743432       | 955.495571     | 478.251424       | 9  |
| 8  | 903.384288  | 452.195782      | 886.357739  | 443.682507       | 885.373723     | 443.190499       | Q    | 858.479193  | 429.743235      | 841.452644  | 421.229960       | 840.468628     | 420.737952       | 8  |
| 9  | 1004.431967 | 502.719622      | 987.405418  | 494.206347       | 986.421402     | 493.714339       | T    | 730.420615  | 365.713946      | 713.394066  | 357.200671       | 712.410050     | 356.708663       | 7  |
| 10 | 1103.500381 | 552.253829      | 1086.473832 | 543.740554       | 1085.489816    | 543.248546       | V    | 629.372936  | 315.190106      | 612.346387  | 306.676832       |                |                  | 6  |
| 11 | 1202.568795 | 601.788036      | 1185.542246 | 593.274761       | 1184.558230    | 592.782753       | V    | 530.304522  | 265.655899      | 513.277973  | 257.142625       |                |                  | 5  |
| 12 | 1273.605909 | 637.306593      | 1256.579360 | 628.793318       | 1255.595344    | 628.301310       | A    | 431.236108  | 216.121692      | 414.209559  | 207.608417       |                |                  | 4  |
| 13 | 1330.627373 | 665.817325      | 1313.600824 | 657.304050       | 1312.616808    | 656.812042       | G    | 360.198994  | 180.603135      | 343.172445  | 172.089860       |                |                  | 3  |
| 14 | 1458.685951 | 729.846614      | 1441.659402 | 721.333339       | 1440.675386    | 720.841331       | Q    | 303.177530  | 152.092403      | 286.150981  | 143.579129       |                |                  | 2  |
| 15 |             |                 |             |                  |                |                  | R    | 175.118952  | 88.063114       | 158.092403  | 79.549839        |                |                  | 1  |

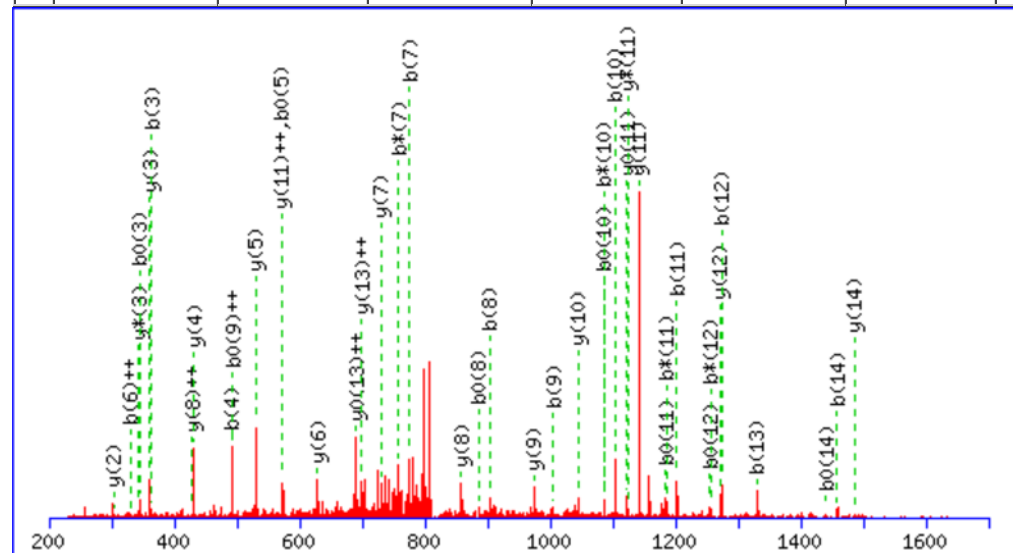

## Peptide View

MS/MS Fragmentation of **ALVFVDNHDNQR**

Found in **IPI00021447**, Tax\_Id=9606 Gene\_Symbol=AMY2B Alpha-amylase 2B

**Experiment:** 43 - OPE-1 **Fraction:** OPE-1

Match to Query 8704: 1426.696848 from(714.355700,2+)

Title: OECHL100310\_39.9138.9138.2.dta

Data file \\BOROMIR\Masse\Data LTQ-Orbitrap\Chrystelle Lacroix\Etude clinique sJPU\OECHL100310\_39.raw

**Monoisotopic mass of neutral peptide Mr(calc):** 1426.695328**Fixed modifications:** Carbamidomethyl (C) (apply to specified residues or termini only)**Ions Score:** 49

**Expect:** 0.0013**Matches :** 26/104 fragment ions using 59 most intense peaks ([help](#))

| #  | b                  | b <sup>++</sup> | b*          | b <sup>*++</sup> | b <sup>0</sup> | b <sup>0++</sup> | Seq. | y                  | y <sup>++</sup>   | y*                 | y <sup>*++</sup>  | y <sup>0</sup>     | y <sup>0++</sup> | #  |
|----|--------------------|-----------------|-------------|------------------|----------------|------------------|------|--------------------|-------------------|--------------------|-------------------|--------------------|------------------|----|
| 1  | 72.044390          | 36.525833       |             |                  |                |                  | A    |                    |                   |                    |                   |                    |                  | 12 |
| 2  | 185.128454         | 93.067865       |             |                  |                |                  | L    | 1356.665488        | 678.836382        | 1339.638939        | 670.323108        | 1338.654923        | 669.831100       | 11 |
| 3  | <b>284.196868</b>  | 142.602072      |             |                  |                |                  | V    | <b>1243.581424</b> | <b>622.294350</b> | 1226.554875        | 613.781076        | 1225.570859        | 613.289068       | 10 |
| 4  | <b>431.265282</b>  | 216.136279      |             |                  |                |                  | F    | <b>1144.513010</b> | <b>572.760143</b> | <b>1127.486461</b> | <b>564.246869</b> | <b>1126.502445</b> | 563.754861       | 9  |
| 5  | <b>530.333696</b>  | 265.670486      |             |                  |                |                  | V    | <b>997.444596</b>  | <b>499.225936</b> | <b>980.418047</b>  | 490.712662        | 979.434031         | 490.220654       | 8  |
| 6  | 645.360639         | 323.183958      |             |                  | 627.350074     | 314.178675       | D    | <b>898.376182</b>  | 449.691729        | <b>881.349633</b>  | 441.178455        | 880.365617         | 440.686447       | 7  |
| 7  | <b>759.403566</b>  | 380.205421      | 742.377017  | 371.692146       | 741.393001     | 371.200138       | N    | <b>783.349239</b>  | <b>392.178258</b> | 766.322690         | 383.664983        | 765.338674         | 383.172975       | 6  |
| 8  | <b>896.462478</b>  | 448.734877      | 879.435929  | 440.221602       | 878.451913     | 439.729594       | H    | <b>669.306312</b>  | 335.156794        | 652.279763         | 326.643520        | 651.295747         | 326.151512       | 5  |
| 9  | <b>1011.489421</b> | 506.248348      | 994.462872  | 497.735074       | 993.478856     | 497.243066       | D    | <b>532.247400</b>  | 266.627338        | 515.220851         | 258.114064        | 514.236835         | 257.622056       | 4  |
| 10 | <b>1125.532348</b> | 563.269812      | 1108.505799 | 554.756538       | 1107.521783    | 554.264529       | N    | <b>417.220457</b>  | 209.113867        | 400.193908         | 200.600592        |                    |                  | 3  |
| 11 | <b>1253.590926</b> | 627.299101      | 1236.564377 | 618.785827       | 1235.580361    | 618.293819       | Q    | <b>303.177530</b>  | 152.092403        | 286.150981         | 143.579129        |                    |                  | 2  |
| 12 |                    |                 |             |                  |                |                  | R    | 175.118952         | 88.063114         | 158.092403         | 79.549839         |                    |                  | 1  |

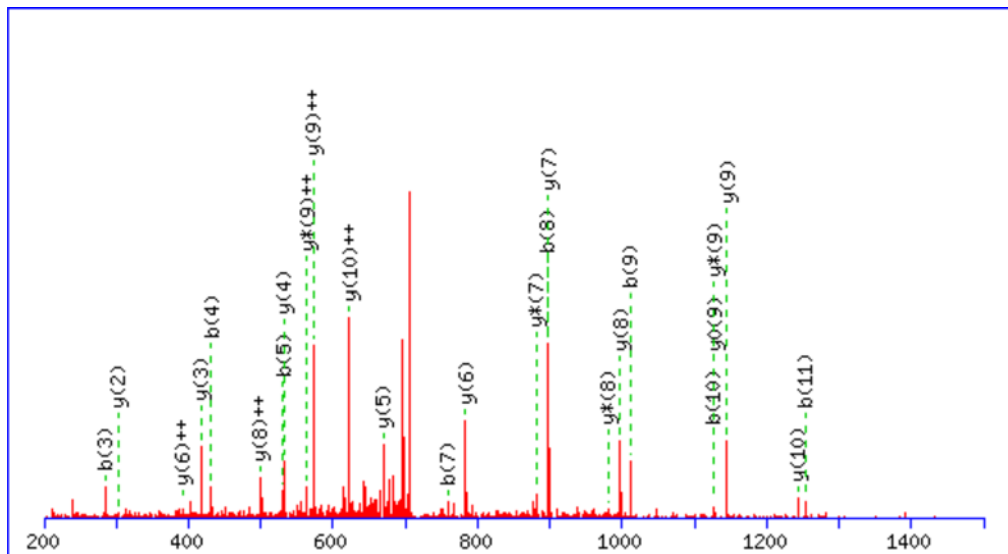

## Peptide View

MS/MS Fragmentation of **AADDTWEPFASGK**

Found in **IPI00022432**, Tax\_Id=9606 Gene\_Symbol=TTR Transthyretin

**Experiment:** 28 - NOPE1 **Fraction:** NOPE1

Match to Query 8043: 1393.615248 from(697.814900,2+)

Title: OECHL100310\_37.15266.15266.2.dta

Data file \\BOROMIR\Masse\Data LTQ-Orbitrap\Chrystelle Lacroix\Etude clinique sJPU\OECHL100310\_37.raw

**Monoisotopic mass of neutral peptide Mr(calc):** 1393.615005 **Fixed modifications:** Carbamidomethyl (C) (apply to specified residues or termini only) **Ions Score:** 58

**Expect:** 0.0001 **Matches :** 15/112 fragment ions using 24 most intense peaks ([help](#))

| # | b                 | b <sup>++</sup> | b <sup>0</sup>    | b <sup>0++</sup> | Seq.     | y                  | y <sup>++</sup> | y <sup>*</sup> | y <sup>*++</sup> | y <sup>0</sup> | y <sup>0++</sup> | #         |
|---|-------------------|-----------------|-------------------|------------------|----------|--------------------|-----------------|----------------|------------------|----------------|------------------|-----------|
| 1 | 72.044390         | 36.525833       |                   |                  | <b>A</b> |                    |                 |                |                  |                |                  | <b>13</b> |
| 2 | 143.081504        | 72.044390       |                   |                  | <b>A</b> | 1323.585173        | 662.296225      | 1306.558624    | 653.782950       | 1305.574608    | 653.290942       | <b>12</b> |
| 3 | <b>258.108447</b> | 129.557862      | 240.097882        | 120.552579       | <b>D</b> | <b>1252.548059</b> | 626.777668      | 1235.521510    | 618.264393       | 1234.537494    | 617.772385       | <b>11</b> |
| 4 | <b>373.135390</b> | 187.071333      | 355.124825        | 178.066051       | <b>D</b> | 1137.521116        | 569.264196      | 1120.494567    | 560.750922       | 1119.510551    | 560.258914       | <b>10</b> |
| 5 | <b>474.183069</b> | 237.595173      | <b>456.172504</b> | 228.589890       | <b>T</b> | <b>1022.494173</b> | 511.750725      | 1005.467624    | 503.237450       | 1004.483608    | 502.745442       | <b>9</b>  |
| 6 | 660.262382        | 330.634829      | 642.251817        | 321.629547       | <b>W</b> | <b>921.446494</b>  | 461.226885      | 904.419945     | 452.713611       | 903.435929     | 452.221603       | <b>8</b>  |

|    |                    |            |             |            |          |                   |            |            |            |            |            |          |
|----|--------------------|------------|-------------|------------|----------|-------------------|------------|------------|------------|------------|------------|----------|
| 7  | <b>789.304975</b>  | 395.156126 | 771.294410  | 386.150843 | <b>E</b> | <b>735.367181</b> | 368.187229 | 718.340632 | 359.673954 | 717.356616 | 359.181946 | <b>7</b> |
| 8  | 886.357739         | 443.682508 | 868.347174  | 434.677225 | <b>P</b> | <b>606.324588</b> | 303.665932 | 589.298039 | 295.152658 | 588.314023 | 294.660650 | <b>6</b> |
| 9  | <b>1033.426153</b> | 517.216715 | 1015.415588 | 508.211432 | <b>F</b> | 509.271824        | 255.139550 | 492.245275 | 246.626275 | 491.261259 | 246.134267 | <b>5</b> |
| 10 | <b>1104.463267</b> | 552.735272 | 1086.452702 | 543.729989 | <b>A</b> | <b>362.203410</b> | 181.605343 | 345.176861 | 173.092068 | 344.192845 | 172.600060 | <b>4</b> |
| 11 | <b>1191.495295</b> | 596.251286 | 1173.484730 | 587.246003 | <b>S</b> | <b>291.166296</b> | 146.086786 | 274.139747 | 137.573512 | 273.155731 | 137.081504 | <b>3</b> |
| 12 | 1248.516759        | 624.762018 | 1230.506194 | 615.756735 | <b>G</b> | 204.134268        | 102.570772 | 187.107719 | 94.057497  |            |            | <b>2</b> |
| 13 |                    |            |             |            | <b>K</b> | 147.112804        | 74.060040  | 130.086255 | 65.546765  |            |            | <b>1</b> |

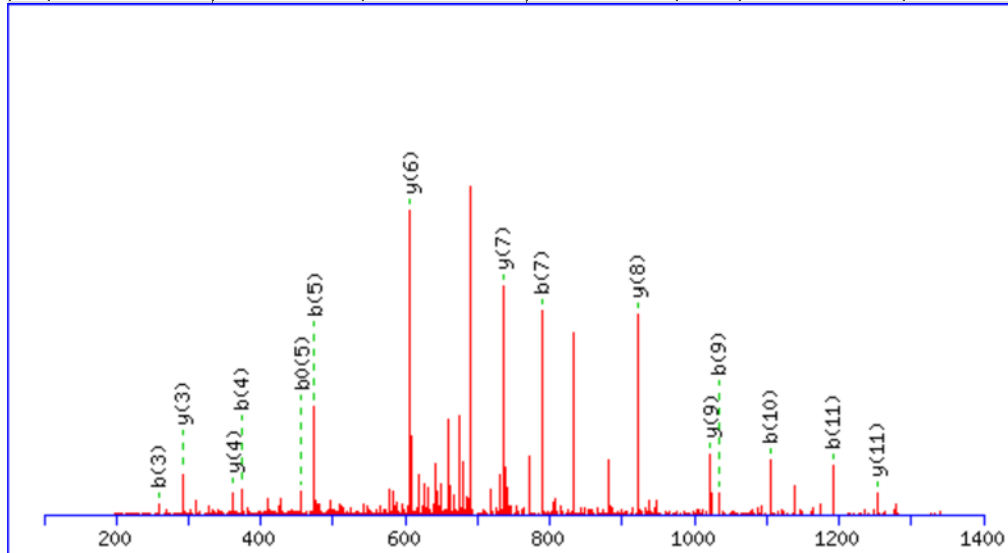

## Peptide View

MS/MS Fragmentation of **SDAAVDTSEITTK**

Found in **IPI00412977**, Tax\_Id=9606 Gene\_Symbol=- Prothymosin alpha

**Experiment:** 28 - NOPE1 **Fraction:** NOPE1

Match to Query 8814: 1465.679248 from(733.846900,2+)

Title: OECHL100310\_37.9995.9995.2.dta

Data file \\BOROMIR\Masse\Data LTQ-Orbitrap\Chrystelle Lacroix\Etude clinique sJPU\OECHL100310\_37.raw

**Monoisotopic mass of neutral peptide Mr(calc):** 1465.678391 **Fixed modifications:** Carbamidomethyl (C) (apply to specified residues or termini only) **Variable modifications:** N-term : Acetyl (N-term) **Ions Score:** 79 **Expect:** 1.1e-006 **Matches :** 29/128 fragment ions using 48 most intense peaks ([help](#))

| #  | <b>b</b>    | <b>b<sup>++</sup></b> | <b>b<sup>0</sup></b> | <b>b<sup>0++</sup></b> | Seq. | <b>y</b>    | <b>y<sup>++</sup></b> | <b>y<sup>*</sup></b> | <b>y<sup>*++</sup></b> | <b>y<sup>0</sup></b> | <b>y<sup>0++</sup></b> | #  |
|----|-------------|-----------------------|----------------------|------------------------|------|-------------|-----------------------|----------------------|------------------------|----------------------|------------------------|----|
| 1  | 130.049869  | 65.528572             | 112.039304           | 56.523290              | S    |             |                       |                      |                        |                      |                        | 14 |
| 2  | 245.076812  | 123.042044            | 227.066247           | 114.036761             | D    | 1337.643082 | 669.325179            | 1320.616533          | 660.811905             | 1319.632517          | 660.319897             | 13 |
| 3  | 316.113926  | 158.560601            | 298.103361           | 149.555319             | A    | 1222.616139 | 611.811708            | 1205.589590          | 603.298433             | 1204.605574          | 602.806425             | 12 |
| 4  | 387.151040  | 194.079158            | 369.140475           | 185.073875             | A    | 1151.579025 | 576.293151            | 1134.552476          | 567.779876             | 1133.568460          | 567.287868             | 11 |
| 5  | 486.219454  | 243.613365            | 468.208889           | 234.608082             | V    | 1080.541911 | 540.774594            | 1063.515362          | 532.261319             | 1062.531346          | 531.769311             | 10 |
| 6  | 601.246397  | 301.126837            | 583.235832           | 292.121554             | D    | 981.473497  | 491.240387            | 964.446948           | 482.727112             | 963.462932           | 482.235104             | 9  |
| 7  | 702.294076  | 351.650676            | 684.283511           | 342.645394             | T    | 866.446554  | 433.726915            | 849.420005           | 425.213641             | 848.435989           | 424.721633             | 8  |
| 8  | 789.326104  | 395.166690            | 771.315539           | 386.161408             | S    | 765.398875  | 383.203076            | 748.372326           | 374.689801             | 747.388310           | 374.197793             | 7  |
| 9  | 876.358132  | 438.682704            | 858.347567           | 429.677421             | S    | 678.366847  | 339.687062            | 661.340298           | 331.173787             | 660.356282           | 330.681779             | 6  |
| 10 | 1005.400725 | 503.204001            | 987.390160           | 494.198718             | E    | 591.334819  | 296.171048            | 574.308270           | 287.657773             | 573.324254           | 287.165765             | 5  |
| 11 | 1118.484789 | 559.746033            | 1100.474224          | 550.740750             | I    | 462.292226  | 231.649751            | 445.265677           | 223.136477             | 444.281661           | 222.644469             | 4  |
| 12 | 1219.532468 | 610.269872            | 1201.521903          | 601.264590             | T    | 349.208162  | 175.107719            | 332.181613           | 166.594445             | 331.197597           | 166.102437             | 3  |
| 13 | 1320.580147 | 660.793712            | 1302.569582          | 651.788429             | T    | 248.160483  | 124.583879            | 231.133934           | 116.070605             | 230.149918           | 115.578597             | 2  |
| 14 |             |                       |                      |                        | K    | 147.112804  | 74.060040             | 130.086255           | 65.546765              |                      |                        | 1  |

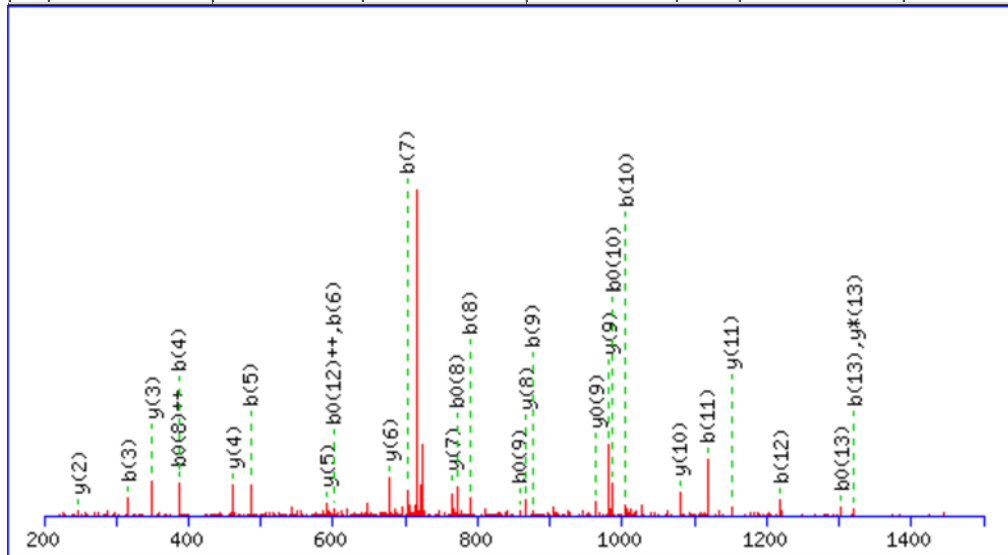

## Peptide View

MS/MS Fragmentation of **LLIYDASNLETGVPSR**

Found in **IPI00003111**, Tax\_Id=9606 Gene\_Symbol=LOC652694 Ig kappa chain V-I region AU

**Experiment:** 28 - NOPE1 **Fraction:** NOPE1

Match to Query 11940: 1746.917248 from(874.465900,2+)

Title: OECHL100310\_37.17246.17246.2.dta

Data file \\BOROMIR\Masse\Data LTQ-Orbitrap\Chrystelle Lacroix\Etude clinique sJPU\OECHL100310\_37.raw

**Monoisotopic mass of neutral peptide Mr(calc):** 1746.915192**Fixed modifications:** Carbamidomethyl (C) (apply to specified residues or termini only)**Ions Score:** 82

**Expect:** 7.2e-007**Matches :** 28/156 fragment ions using 42 most intense peaks ([help](#))

| #  | b                  | b <sup>++</sup>   | b*                 | b <sup>*++</sup> | b <sup>0</sup> | b <sup>0++</sup>  | Seq. | y                  | y <sup>++</sup>   | y*          | y <sup>*++</sup> | y <sup>0</sup>     | y <sup>0++</sup> | #  |
|----|--------------------|-------------------|--------------------|------------------|----------------|-------------------|------|--------------------|-------------------|-------------|------------------|--------------------|------------------|----|
| 1  | 114.091340         | 57.549308         |                    |                  |                |                   | L    |                    |                   |             |                  |                    |                  | 16 |
| 2  | 227.175404         | 114.091340        |                    |                  |                |                   | L    | 1634.838427        | 817.922852        | 1617.811878 | 809.409577       | 1616.827862        | 808.917569       | 15 |
| 3  | 340.259468         | 170.633372        |                    |                  |                |                   | I    | <b>1521.754363</b> | <b>761.380820</b> | 1504.727814 | 752.867545       | 1503.743798        | 752.375537       | 14 |
| 4  | <b>503.322797</b>  | 252.165036        |                    |                  |                |                   | Y    | 1408.670299        | 704.838788        | 1391.643750 | 696.325513       | <b>1390.659734</b> | 695.833505       | 13 |
| 5  | <b>618.349740</b>  | 309.678508        |                    |                  | 600.339175     | 300.673226        | D    | <b>1245.606970</b> | 623.307123        | 1228.580421 | 614.793849       | 1227.596405        | 614.301841       | 12 |
| 6  | 689.386854         | 345.197065        |                    |                  | 671.376289     | 336.191782        | A    | 1130.580027        | 565.793652        | 1113.553478 | 557.280377       | 1112.569462        | 556.788369       | 11 |
| 7  | 776.418882         | 388.713079        |                    |                  | 758.408317     | 379.707796        | S    | <b>1059.542913</b> | 530.275095        | 1042.516364 | 521.761820       | 1041.532348        | 521.269812       | 10 |
| 8  | <b>890.461809</b>  | 445.734542        | <b>873.435260</b>  | 437.221268       | 872.451244     | 436.729260        | N    | <b>972.510885</b>  | 486.759081        | 955.484336  | 478.245806       | 954.500320         | 477.753798       | 9  |
| 9  | <b>1003.545873</b> | 502.276574        | 986.519324         | 493.763300       | 985.535308     | 493.271292        | L    | <b>858.467958</b>  | 429.737617        | 841.441409  | 421.224343       | 840.457393         | 420.732335       | 8  |
| 10 | <b>1132.588466</b> | 566.797871        | 1115.561917        | 558.284597       | 1114.577901    | 557.792588        | E    | <b>745.383894</b>  | 373.195585        | 728.357345  | 364.682311       | 727.373329         | 364.190303       | 7  |
| 11 | <b>1233.636145</b> | <b>617.321710</b> | 1216.609596        | 608.808436       | 1215.625580    | 608.316428        | T    | <b>616.341301</b>  | 308.674289        | 599.314752  | 300.161014       | 598.330736         | 299.669006       | 6  |
| 12 | <b>1290.657609</b> | 645.832442        | 1273.631060        | 637.319168       | 1272.647044    | 636.827160        | G    | <b>515.293622</b>  | 258.150449        | 498.267073  | 249.637175       | 497.283057         | 249.145167       | 5  |
| 13 | <b>1389.726023</b> | 695.366649        | <b>1372.699474</b> | 686.853375       | 1371.715458    | 686.361367        | V    | <b>458.272158</b>  | 229.639717        | 441.245609  | 221.126443       | 440.261593         | 220.634435       | 4  |
| 14 | <b>1486.778787</b> | 743.893032        | 1469.752238        | 735.379757       | 1468.768222    | <b>734.887749</b> | P    | <b>359.203744</b>  | 180.105510        | 342.177195  | 171.592236       | <b>341.193179</b>  | 171.100228       | 3  |
| 15 | <b>1573.810815</b> | 787.409046        | <b>1556.784266</b> | 778.895771       | 1555.800250    | 778.403763        | S    | 262.150980         | 131.579128        | 245.124431  | 123.065854       | 244.140415         | 122.573846       | 2  |
| 16 |                    |                   |                    |                  |                |                   | R    | 175.118952         | 88.063114         | 158.092403  | 79.549839        |                    |                  | 1  |

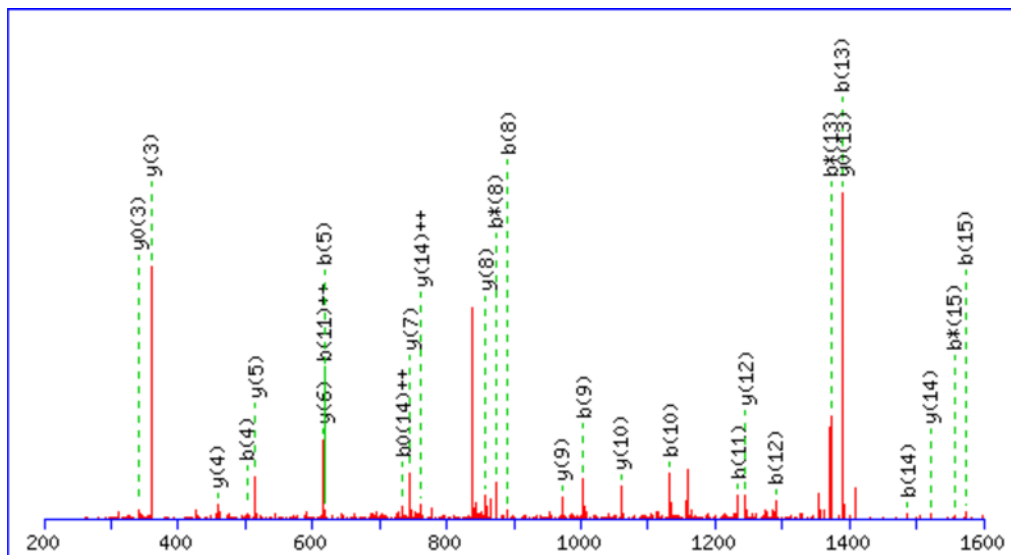

## Peptide View

MS/MS Fragmentation of **QLTSGPNQEQVSPLTLK**

Found in **IPI00029863**, Tax\_Id=9606 Gene\_Symbol=- 55 kDa protein

**Experiment:** 28 - NOPE1 **Fraction:** NOPE1

Match to Query 13717: 1952.058848 from(977.036700,2+)

Title: OECHL100310\_37.18607.18607.2.dta

Data file \\BOROMIR\Masse\Data LTQ-Orbitrap\Chrystelle Lacroix\Etude clinique sJPU\OECHL100310\_37.raw

**Monoisotopic mass of neutral peptide Mr(calc):** 1952.057846 **Fixed modifications:** Carbamidomethyl (C) (apply to specified residues or termini only) **Ions Score:** 97

**Expect:** 1.1e-008 **Matches :** 22/194 fragment ions using 32 most intense peaks ([help](#))

| # | b          | b <sup>++</sup> | b*         | b* <sup>++</sup> | b <sup>0</sup> | b <sup>0++</sup> | Seq.     | y           | y <sup>++</sup> | y*          | y* <sup>++</sup> | y <sup>0</sup> | y <sup>0++</sup> | #         |
|---|------------|-----------------|------------|------------------|----------------|------------------|----------|-------------|-----------------|-------------|------------------|----------------|------------------|-----------|
| 1 | 129.065854 | 65.036565       | 112.039305 | 56.523291        |                |                  | <b>Q</b> |             |                 |             |                  |                |                  | <b>18</b> |
| 2 | 242.149918 | 121.578597      | 225.123369 | 113.065323       |                |                  | <b>L</b> | 1825.006556 | 913.006916      | 1807.980007 | 904.493642       | 1806.995991    | 904.001634       | <b>17</b> |
| 3 | 343.197597 | 172.102437      | 326.171048 | 163.589162       | 325.187032     | 163.097154       | <b>T</b> | 1711.922492 | 856.464884      | 1694.895943 | 847.951610       | 1693.911927    | 847.459601       | <b>16</b> |
| 4 | 430.229625 | 215.618450      | 413.203076 | 207.105176       | 412.219060     | 206.613168       | <b>S</b> | 1610.874813 | 805.941044      | 1593.848264 | 797.427770       | 1592.864248    | 796.935762       | <b>15</b> |
| 5 | 487.251089 | 244.129182      | 470.224540 | 235.615908       | 469.240524     | 235.123900       | <b>G</b> | 1523.842785 | 762.425031      | 1506.816236 | 753.911756       | 1505.832220    | 753.419748       | <b>14</b> |
| 6 | 584.303853 | 292.655565      | 567.277304 | 284.142290       | 566.293288     | 283.650282       | <b>P</b> | 1466.821321 | 733.914298      | 1449.794772 | 725.401024       | 1448.810756    | 724.909016       | <b>13</b> |



|    |             |            |             |            |             |            |   |             |            |             |            |             |            |    |
|----|-------------|------------|-------------|------------|-------------|------------|---|-------------|------------|-------------|------------|-------------|------------|----|
| 7  | 698.346780  | 349.677028 | 681.320231  | 341.163753 | 680.336215  | 340.671745 | N | 1369.768557 | 685.387917 | 1352.742008 | 676.874642 | 1351.757992 | 676.382634 | 12 |
| 8  | 826.405358  | 413.706317 | 809.378809  | 405.193042 | 808.394793  | 404.701034 | Q | 1255.725630 | 628.366453 | 1238.699081 | 619.853179 | 1237.715065 | 619.361171 | 11 |
| 9  | 955.447951  | 478.227614 | 938.421402  | 469.714339 | 937.437386  | 469.222331 | E | 1127.667052 | 564.337164 | 1110.640503 | 555.823890 | 1109.656487 | 555.331882 | 10 |
| 10 | 1083.506529 | 542.256903 | 1066.479980 | 533.743628 | 1065.495964 | 533.251620 | Q | 998.624459  | 499.815868 | 981.597910  | 491.302593 | 980.613894  | 490.810585 | 9  |
| 11 | 1182.574943 | 591.791110 | 1165.548394 | 583.277835 | 1164.564378 | 582.785827 | V | 870.565881  | 435.786579 | 853.539332  | 427.273304 | 852.555316  | 426.781296 | 8  |
| 12 | 1269.606971 | 635.307124 | 1252.580422 | 626.793849 | 1251.596406 | 626.301841 | S | 771.497467  | 386.252371 | 754.470918  | 377.739097 | 753.486902  | 377.247089 | 7  |
| 13 | 1366.659735 | 683.833506 | 1349.633186 | 675.320231 | 1348.649170 | 674.828223 | P | 684.465439  | 342.736357 | 667.438890  | 334.223083 | 666.454874  | 333.731075 | 6  |
| 14 | 1479.743799 | 740.375538 | 1462.717250 | 731.862263 | 1461.733234 | 731.370255 | L | 587.412675  | 294.209975 | 570.386126  | 285.696701 | 569.402110  | 285.204693 | 5  |
| 15 | 1580.791478 | 790.899377 | 1563.764929 | 782.386103 | 1562.780913 | 781.894095 | T | 474.328611  | 237.667943 | 457.302062  | 229.154669 | 456.318046  | 228.662661 | 4  |
| 16 | 1693.875542 | 847.441409 | 1676.848993 | 838.928135 | 1675.864977 | 838.436127 | L | 373.280932  | 187.144104 | 356.254383  | 178.630829 |             |            | 3  |
| 17 | 1806.959606 | 903.983441 | 1789.933057 | 895.470167 | 1788.949041 | 894.978158 | L | 260.196868  | 130.602072 | 243.170319  | 122.088797 |             |            | 2  |
| 18 |             |            |             |            |             |            | K | 147.112804  | 74.060040  | 130.086255  | 65.546765  |             |            | 1  |

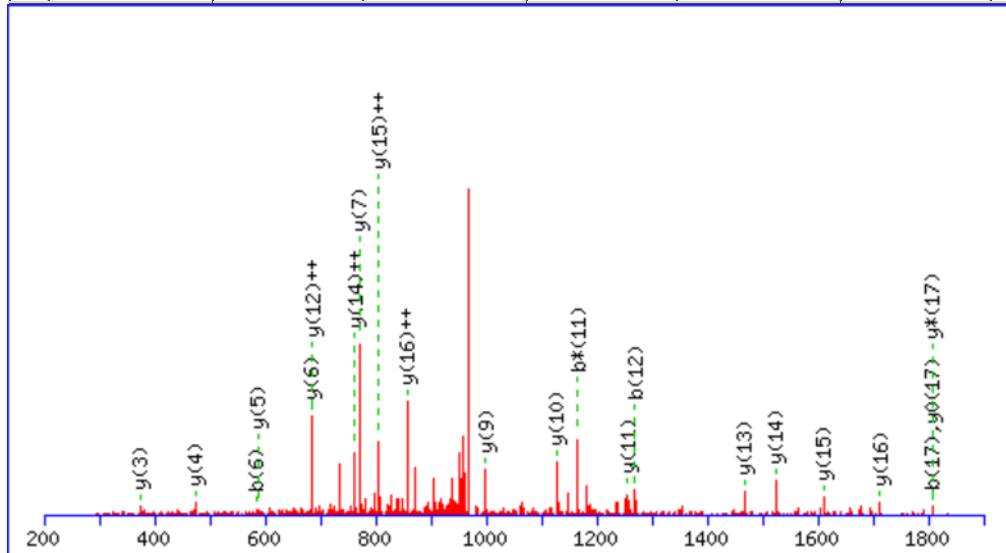

## Peptide View

MS/MS Fragmentation of **HSFKGEECPAGSHR**

Found in **IPI00021970**, Tax\_Id=9606 Gene\_Symbol=MGC31957;TNFRSF10C TNFRSF10C protein

Experiment: 28 - NOPE1 Fraction: NOPE1

Match to Query 10324: 1597.706848 from(799.860700,2+)

Title: OECHL100310\_37.2251.2251.2.dta

Data file \\BOROMIR\Masse\Data LTQ-Orbitrap\Chrystelle Lacroix\Etude clinique sJPU\OECHL100310\_37.raw

**Monoisotopic mass of neutral peptide Mr(calc): 1597.705566**Fixed modifications: Carbamidomethyl (C) (apply to specified residues or termini only)**Ions Score: 73****Expect: 3e-006**Matches : 34/144 fragment ions using 56 most intense peaks ([help](#))

| #  | b                  | b <sup>++</sup> | b*                 | b <sup>+++</sup>  | b <sup>0</sup>    | b <sup>0++</sup>  | Seq. | y                  | y <sup>++</sup>   | y*          | y <sup>+++</sup>  | y <sup>0</sup> | y <sup>0++</sup>  | #  |
|----|--------------------|-----------------|--------------------|-------------------|-------------------|-------------------|------|--------------------|-------------------|-------------|-------------------|----------------|-------------------|----|
| 1  | 138.066188         | 69.536732       |                    |                   |                   |                   | H    |                    |                   |             |                   |                |                   | 14 |
| 2  | <b>225.098216</b>  | 113.052746      |                    |                   | 207.087651        | 104.047463        | S    | <b>1461.653938</b> | <b>731.330607</b> | 1444.627389 | 722.817333        | 1443.643373    | <b>722.325325</b> | 13 |
| 3  | <b>372.166630</b>  | 186.586953      |                    |                   | <b>354.156065</b> | 177.581671        | F    | <b>1374.621910</b> | <b>687.814593</b> | 1357.595361 | 679.301319        | 1356.611345    | 678.809311        | 12 |
| 4  | <b>500.261593</b>  | 250.634435      | <b>483.235044</b>  | 242.121160        | <b>482.251028</b> | 241.629152        | K    | <b>1227.553496</b> | <b>614.280386</b> | 1210.526947 | <b>605.767112</b> | 1209.542931    | <b>605.275104</b> | 11 |
| 5  | 557.283057         | 279.145167      | 540.256508         | 270.631892        | <b>539.272492</b> | 270.139884        | G    | <b>1099.458533</b> | 550.232905        | 1082.431984 | 541.719630        | 1081.447968    | 541.227622        | 10 |
| 6  | <b>686.325650</b>  | 343.666463      | 669.299101         | 335.153189        | 668.315085        | 334.661181        | E    | <b>1042.437069</b> | 521.722173        | 1025.410520 | 513.208898        | 1024.426504    | 512.716890        | 9  |
| 7  | 815.368243         | 408.187760      | 798.341694         | <b>399.674485</b> | 797.357678        | <b>399.182477</b> | E    | <b>913.394476</b>  | 457.200876        | 896.367927  | 448.687602        | 895.383911     | 448.195594        | 8  |
| 8  | <b>975.398892</b>  | 488.203084      | 958.372343         | 479.689810        | 957.388327        | 479.197802        | C    | <b>784.351883</b>  | 392.679580        | 767.325334  | 384.166305        | 766.341318     | 383.674297        | 7  |
| 9  | 1072.451656        | 536.729466      | 1055.425107        | 528.216192        | 1054.441091       | 527.724184        | P    | <b>624.321234</b>  | <b>312.664255</b> | 607.294685  | 304.150981        | 606.310669     | 303.658973        | 6  |
| 10 | <b>1143.488770</b> | 572.248023      | 1126.462221        | 563.734749        | 1125.478205       | 563.242741        | A    | 527.268470         | 264.137873        | 510.241921  | 255.624598        | 509.257905     | 255.132590        | 5  |
| 11 | <b>1200.510234</b> | 600.758755      | 1183.483685        | 592.245481        | 1182.499669       | 591.753473        | G    | <b>456.231356</b>  | 228.619316        | 439.204807  | 220.106041        | 438.220791     | 219.614033        | 4  |
| 12 | <b>1287.542262</b> | 644.274769      | 1270.515713        | 635.761495        | 1269.531697       | 635.269487        | S    | <b>399.209892</b>  | 200.108584        | 382.183343  | 191.595309        | 381.199327     | 191.103301        | 3  |
| 13 | <b>1424.601174</b> | 712.804225      | <b>1407.574625</b> | 704.290951        | 1406.590609       | 703.798943        | H    | <b>312.177864</b>  | 156.592570        | 295.151315  | 148.079295        |                |                   | 2  |
| 14 |                    |                 |                    |                   |                   |                   | R    | 175.118952         | 88.063114         | 158.092403  | 79.549839         |                |                   | 1  |

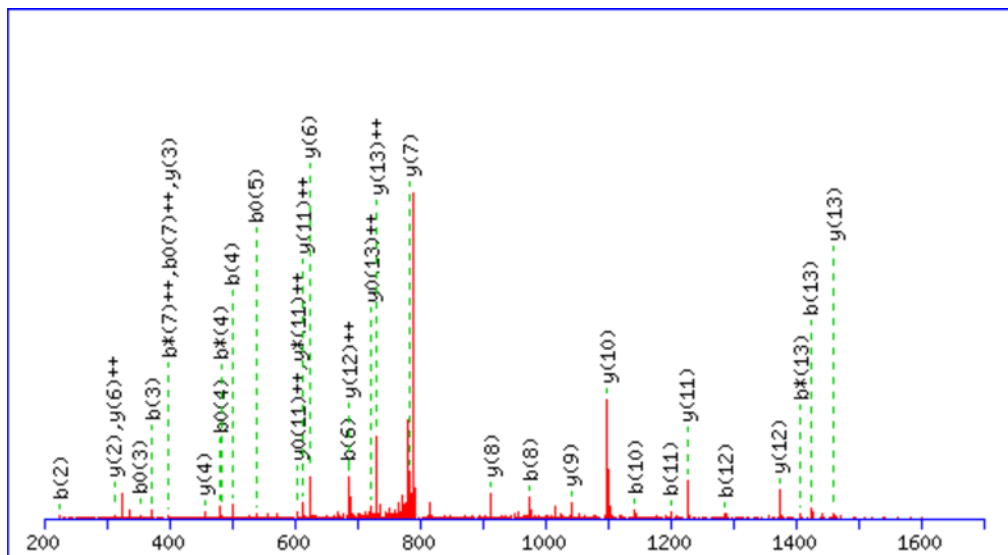

## Peptide View

MS/MS Fragmentation of **ASLQHGQAAEKGPHR**

Found in **IPI00165044**, Tax\_Id=9606 Gene\_Symbol=FAM198B Isoform 2 of Protein ENED

**Experiment:** 28 - NOPE1 **Fraction:** NOPE1

Match to Query 10227: 1585.808048 from(793.911300,2+)

Title: OECHL100310\_37.1804.1804.2.dta

Data file \\BOROMIR\Masse\Data LTQ-Orbitrap\Chrystelle Lacroix\Etude clinique sJPU\OECHL100310\_37.raw

**Monoisotopic mass of neutral peptide Mr(calc):** 1585.807312 **Fixed modifications:** Carbamidomethyl (C) (apply to specified residues or termini only) **Ions Score:** 65

**Expect:** 4e-005 **Matches :** 26/150 fragment ions using 39 most intense peaks ([help](#))

| # | b          | b <sup>++</sup> | b <sup>*</sup> | b <sup>*++</sup> | b <sup>0</sup> | b <sup>0++</sup> | Seq. | y           | y <sup>++</sup> | y <sup>*</sup> | y <sup>*++</sup> | y <sup>0</sup> | y <sup>0++</sup> | #  |
|---|------------|-----------------|----------------|------------------|----------------|------------------|------|-------------|-----------------|----------------|------------------|----------------|------------------|----|
| 1 | 72.044390  | 36.525833       |                |                  |                |                  | A    |             |                 |                |                  |                |                  | 15 |
| 2 | 159.076418 | 80.041847       |                |                  | 141.065853     | 71.036564        | S    | 1515.777500 | 758.392388      | 1498.750951    | 749.879114       | 1497.766935    | 749.387106       | 14 |
| 3 | 272.160482 | 136.583879      |                |                  | 254.149917     | 127.578597       | L    | 1428.745472 | 714.876374      | 1411.718923    | 706.363100       | 1410.734907    | 705.871092       | 13 |
| 4 | 400.219060 | 200.613168      | 383.192511     | 192.099894       | 382.208495     | 191.607886       | Q    | 1315.661408 | 658.334342      | 1298.634859    | 649.821068       | 1297.650843    | 649.329060       | 12 |
| 5 | 537.277972 | 269.142624      | 520.251423     | 260.629350       | 519.267407     | 260.137342       | H    | 1187.602830 | 594.305053      | 1170.576281    | 585.791779       | 1169.592265    | 585.299771       | 11 |
| 6 | 594.299436 | 297.653356      | 577.272887     | 289.140082       | 576.288871     | 288.648074       | G    | 1050.543918 | 525.775597      | 1033.517369    | 517.262323       | 1032.533353    | 516.770315       | 10 |

|    |             |            |             |            |             |            |   |            |            |            |            |            |            |   |
|----|-------------|------------|-------------|------------|-------------|------------|---|------------|------------|------------|------------|------------|------------|---|
| 7  | 722.358014  | 361.682645 | 705.331465  | 353.169371 | 704.347449  | 352.677363 | Q | 993.522454 | 497.264865 | 976.495905 | 488.751591 | 975.511889 | 488.259583 | 9 |
| 8  | 793.395128  | 397.201202 | 776.368579  | 388.687928 | 775.384563  | 388.195920 | A | 865.463876 | 433.235576 | 848.437327 | 424.722302 | 847.453311 | 424.230294 | 8 |
| 9  | 864.432242  | 432.719759 | 847.405693  | 424.206485 | 846.421677  | 423.714477 | A | 794.426762 | 397.717019 | 777.400213 | 389.203745 | 776.416197 | 388.711737 | 7 |
| 10 | 993.474835  | 497.241056 | 976.448286  | 488.727781 | 975.464270  | 488.235773 | E | 723.389648 | 362.198462 | 706.363099 | 353.685188 | 705.379083 | 353.193180 | 6 |
| 11 | 1121.569798 | 561.288537 | 1104.543249 | 552.775263 | 1103.559233 | 552.283255 | K | 594.347055 | 297.677166 | 577.320506 | 289.163891 |            |            | 5 |
| 12 | 1178.591262 | 589.799269 | 1161.564713 | 581.285995 | 1160.580697 | 580.793987 | G | 466.252092 | 233.629684 | 449.225543 | 225.116409 |            |            | 4 |
| 13 | 1275.644026 | 638.325651 | 1258.617477 | 629.812377 | 1257.633461 | 629.320369 | P | 409.230628 | 205.118952 | 392.204079 | 196.605677 |            |            | 3 |
| 14 | 1412.702938 | 706.855107 | 1395.676389 | 698.341833 | 1394.692373 | 697.849825 | H | 312.177864 | 156.592570 | 295.151315 | 148.079295 |            |            | 2 |
| 15 |             |            |             |            |             |            | R | 175.118952 | 88.063114  | 158.092403 | 79.549839  |            |            | 1 |

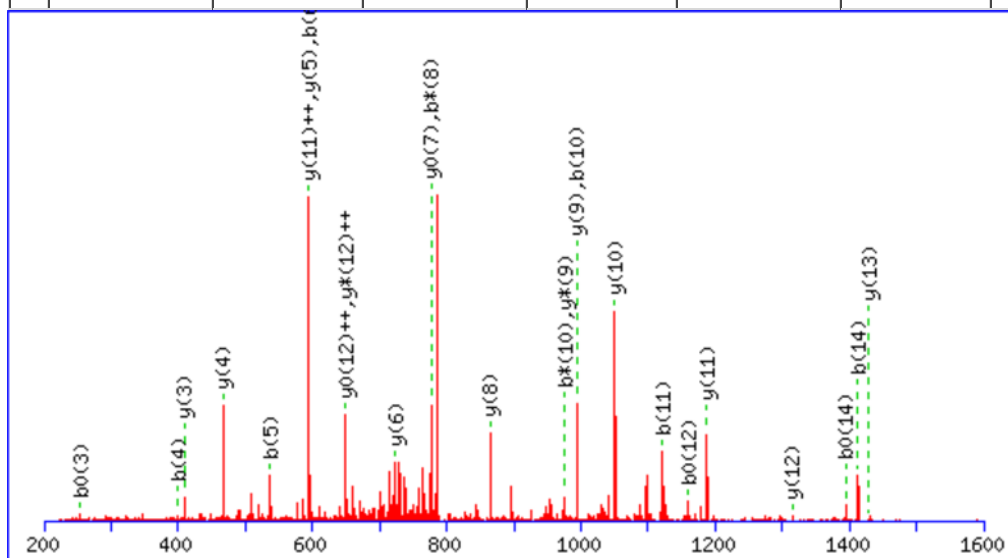

## Peptide View

MS/MS Fragmentation of **KAGPCEQAGSPCR**

Found in **IP100028381**, Tax\_Id=9606 Gene\_Symbol=DLK2 Isoform 1 of Protein delta homolog 2

**Experiment:** 28 - NOPE1 **Fraction:** NOPE1

Match to Query 8267: 1416.624648 from(709.319600,2+)

Title: OECHL100310\_37.2099.2099.2.dta

Data file \\BOROMIR\Masse\Data LTQ-Orbitrap\Chrystelle Lacroix\Etude clinique sJPU\OECHL100310\_37.raw

**Monoisotopic mass of neutral peptide Mr(calc):** 1416.623810**Fixed modifications:** Carbamidomethyl (C) (apply to specified residues or termini only)**Ions Score:** 85

**Expect:** 2.1e-007**Matches :** 20/128 fragment ions using 37 most intense peaks ([help](#))

| #  | b                 | b <sup>++</sup>   | b*          | b <sup>*++</sup> | b <sup>0</sup>     | b <sup>0++</sup> | Seq.     | y                  | y <sup>++</sup>   | y*                 | y <sup>*++</sup> | y <sup>0</sup> | y <sup>0++</sup> | #         |
|----|-------------------|-------------------|-------------|------------------|--------------------|------------------|----------|--------------------|-------------------|--------------------|------------------|----------------|------------------|-----------|
| 1  | 129.102239        | 65.054757         | 112.075690  | 56.541483        |                    |                  | <b>K</b> |                    |                   |                    |                  |                |                  | <b>13</b> |
| 2  | 200.139353        | 100.573315        | 183.112804  | 92.060040        |                    |                  | <b>A</b> | <b>1289.536133</b> | 645.271705        | 1272.509584        | 636.758430       | 1271.525568    | 636.266422       | <b>12</b> |
| 3  | 257.160817        | 129.084047        | 240.134268  | 120.570772       |                    |                  | <b>G</b> | <b>1218.499019</b> | <b>609.753148</b> | 1201.472470        | 601.239873       | 1200.488454    | 600.747865       | <b>11</b> |
| 4  | 354.213581        | 177.610429        | 337.187032  | 169.097154       |                    |                  | <b>P</b> | <b>1161.477555</b> | <b>581.242416</b> | 1144.451006        | 572.729141       | 1143.466990    | 572.237133       | <b>10</b> |
| 5  | 514.244230        | <b>257.625753</b> | 497.217681  | 249.112479       |                    |                  | <b>C</b> | <b>1064.424791</b> | 532.716034        | <b>1047.398242</b> | 524.202759       | 1046.414226    | 523.710751       | <b>9</b>  |
| 6  | 643.286823        | 322.147050        | 626.260274  | 313.633775       | 625.276258         | 313.141767       | <b>E</b> | <b>904.394142</b>  | 452.700709        | 887.367593         | 444.187434       | 886.383577     | 443.695427       | <b>8</b>  |
| 7  | 771.345401        | <b>386.176339</b> | 754.318852  | 377.663064       | 753.334836         | 377.171056       | <b>Q</b> | <b>775.351549</b>  | 388.179413        | 758.325000         | 379.666138       | 757.340984     | 379.174130       | <b>7</b>  |
| 8  | <b>842.382515</b> | 421.694896        | 825.355966  | 413.181621       | 824.371950         | 412.689613       | <b>A</b> | <b>647.292971</b>  | 324.150124        | 630.266422         | 315.636849       | 629.282406     | 315.144841       | <b>6</b>  |
| 9  | 899.403979        | 450.205628        | 882.377430  | 441.692353       | 881.393414         | 441.200345       | <b>G</b> | <b>576.255857</b>  | 288.631567        | 559.229308         | 280.118292       | 558.245292     | 279.626284       | <b>5</b>  |
| 10 | <b>986.436007</b> | 493.721642        | 969.409458  | 485.208367       | 968.425442         | 484.716359       | <b>S</b> | <b>519.234393</b>  | 260.120835        | 502.207844         | 251.607560       | 501.223828     | 251.115552       | <b>4</b>  |
| 11 | 1083.488771       | 542.248024        | 1066.462222 | 533.734749       | <b>1065.478206</b> | 533.242741       | <b>P</b> | <b>432.202365</b>  | 216.604820        | <b>415.175816</b>  | 208.091546       |                |                  | <b>3</b>  |
| 12 | 1243.519420       | 622.263348        | 1226.492871 | 613.750074       | 1225.508855        | 613.258066       | <b>C</b> | <b>335.149601</b>  | 168.078438        | 318.123052         | 159.565164       |                |                  | <b>2</b>  |
| 13 |                   |                   |             |                  |                    |                  | <b>R</b> | 175.118952         | 88.063114         | 158.092403         | 79.549839        |                |                  | <b>1</b>  |

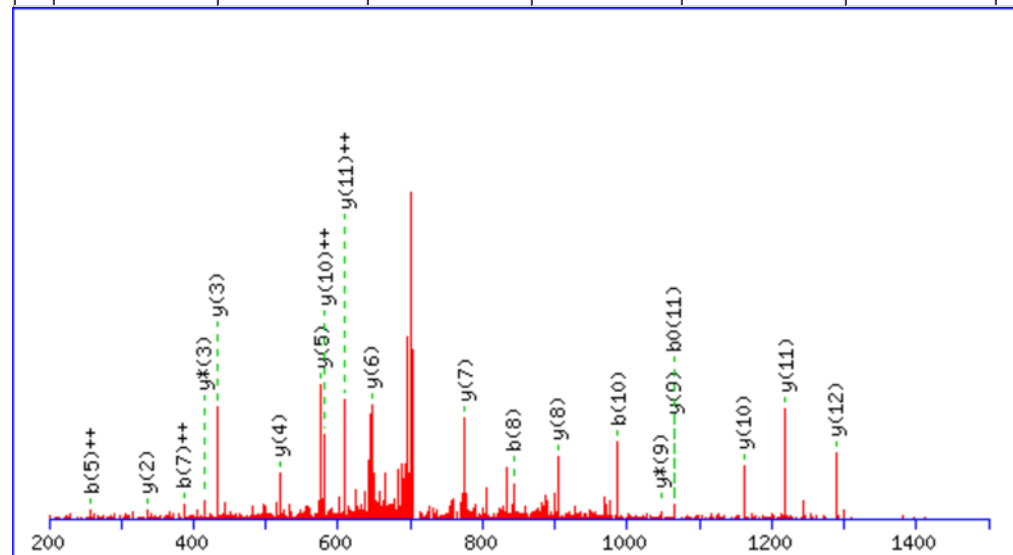

## Peptide View

MS/MS Fragmentation of **AFSMDEHNAALR**

Found in **IPI00008239**, Tax\_Id=9606 Gene\_Symbol=GPRC5B cDNA FLJ55176, highly similar to G-protein coupled receptor family C group 5 member B

**Experiment:** 28 - NOPE1 **Fraction:** NOPE1

Match to Query 7729: 1360.618648 from(681.316600,2+)

Title: OECHL100310\_37.9666.9666.2.dta

Data file \\BOROMIR\Masse\Data LTQ-Orbitrap\Chrystelle Lacroix\Etude clinique sJPU\OECHL100310\_37.raw

**Monoisotopic mass of neutral peptide Mr(calc):** 1360.619354**Fixed modifications:** Carbamidomethyl (C) (apply to specified residues or termini only)**Ions Score:** 52

**Expect:** 0.0004**Matches :** 26/102 fragment ions using 35 most intense peaks ([help](#))

| #  | b                  | b <sup>++</sup>   | b*          | b <sup>*++</sup>  | b <sup>0</sup>     | b <sup>0++</sup>  | Seq. | y                  | y <sup>++</sup>   | y*          | y <sup>*++</sup> | y <sup>0</sup> | y <sup>0++</sup> | #  |
|----|--------------------|-------------------|-------------|-------------------|--------------------|-------------------|------|--------------------|-------------------|-------------|------------------|----------------|------------------|----|
| 1  | 72.044390          | 36.525833         |             |                   |                    |                   | A    |                    |                   |             |                  |                |                  | 12 |
| 2  | <b>219.112804</b>  | 110.060040        |             |                   |                    |                   | F    | 1290.589546        | 645.798411        | 1273.562997 | 637.285137       | 1272.578981    | 636.793128       | 11 |
| 3  | <b>306.144832</b>  | 153.576054        |             |                   | <b>288.134267</b>  | 144.570772        | S    | <b>1143.521132</b> | <b>572.264204</b> | 1126.494583 | 563.750929       | 1125.510567    | 563.258921       | 10 |
| 4  | <b>437.185317</b>  | <b>219.096296</b> |             |                   | 419.174752         | 210.091014        | M    | <b>1056.489104</b> | <b>528.748190</b> | 1039.462555 | 520.234916       | 1038.478539    | 519.742908       | 9  |
| 5  | 552.212260         | 276.609768        |             |                   | 534.201695         | 267.604486        | D    | <b>925.448619</b>  | <b>463.227947</b> | 908.422070  | 454.714673       | 907.438054     | 454.222665       | 8  |
| 6  | 681.254853         | <b>341.131065</b> |             |                   | <b>663.244288</b>  | 332.125782        | E    | <b>810.421676</b>  | 405.714476        | 793.395127  | 397.201201       | 792.411111     | 396.709193       | 7  |
| 7  | <b>818.313765</b>  | 409.660521        |             |                   | 800.303200         | 400.655238        | H    | 681.379083         | <b>341.193179</b> | 664.352534  | 332.679905       |                |                  | 6  |
| 8  | <b>932.356692</b>  | 466.681984        | 915.330143  | 458.168709        | 914.346127         | 457.676701        | N    | <b>544.320171</b>  | 272.663724        | 527.293622  | 264.150449       |                |                  | 5  |
| 9  | <b>1003.393806</b> | 502.200541        | 986.367257  | 493.687266        | 985.383241         | 493.195258        | A    | <b>430.277244</b>  | 215.642260        | 413.250695  | 207.128985       |                |                  | 4  |
| 10 | 1074.430920        | 537.719098        | 1057.404371 | <b>529.205824</b> | <b>1056.420355</b> | <b>528.713816</b> | A    | <b>359.240130</b>  | 180.123703        | 342.213581  | 171.610428       |                |                  | 3  |
| 11 | <b>1187.514984</b> | 594.261130        | 1170.488435 | 585.747856        | 1169.504419        | 585.255847        | L    | <b>288.203016</b>  | 144.605146        | 271.176467  | 136.091871       |                |                  | 2  |
| 12 |                    |                   |             |                   |                    |                   | R    | 175.118952         | 88.063114         | 158.092403  | 79.549839        |                |                  | 1  |

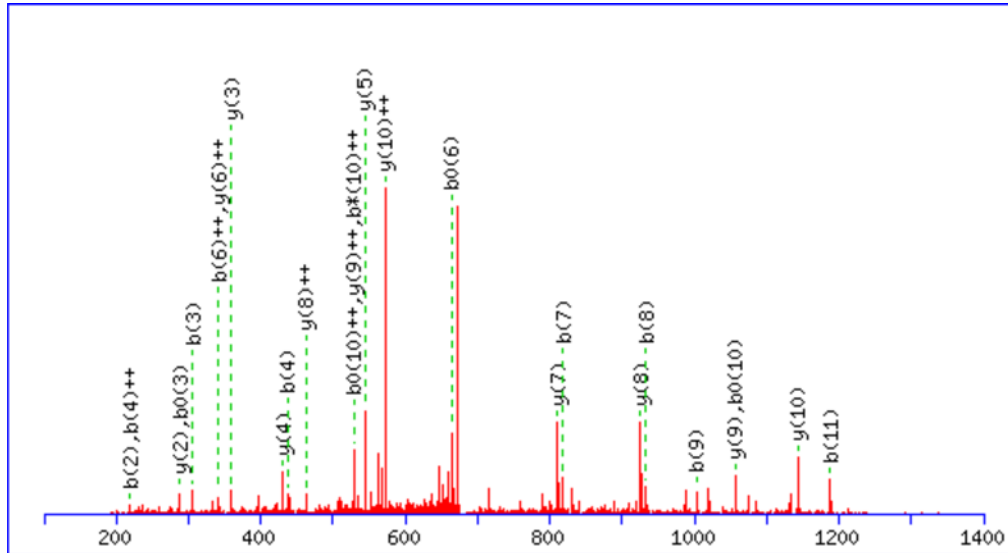

## Peptide View

MS/MS Fragmentation of **LEGEACGVYTPR**

Found in **IPI00297284**, Tax\_Id=9606 Gene\_Symbol=IGFBP2 Insulin-like growth factor-binding protein 2

**Experiment:** 28 - NOPE1 **Fraction:** NOPE1

Match to Query 7627: 1350.626048 from(676.320300,2+)

Title: OECHL100310\_37.8673.8673.2.dta

Data file \\BOROMIR\Masse\Data LTQ-Orbitrap\Chrystelle Lacroix\Etude clinique sJPU\OECHL100310\_37.raw

**Monoisotopic mass of neutral peptide Mr(calc):** 1350.623795 **Fixed modifications:** Carbamidomethyl (C) (apply to specified residues or termini only) **Ions Score:** 55

**Expect:** 0.00035 **Matches :** 14/104 fragment ions using 24 most intense peaks ([help](#))

| # | b                 | b <sup>++</sup> | b <sup>0</sup> | b <sup>0++</sup> | Seq. | y                  | y <sup>++</sup>   | y <sup>*</sup> | y <sup>*++</sup> | y <sup>0</sup> | y <sup>0++</sup> | #  |
|---|-------------------|-----------------|----------------|------------------|------|--------------------|-------------------|----------------|------------------|----------------|------------------|----|
| 1 | 114.091340        | 57.549308       |                |                  | L    |                    |                   |                |                  |                |                  | 12 |
| 2 | <b>243.133933</b> | 122.070605      | 225.123368     | 113.065322       | E    | <b>1238.547015</b> | 619.777146        | 1221.520466    | 611.263871       | 1220.536450    | 610.771863       | 11 |
| 3 | 300.155397        | 150.581336      | 282.144832     | 141.576054       | G    | <b>1109.504422</b> | <b>555.255849</b> | 1092.477873    | 546.742575       | 1091.493857    | 546.250567       | 10 |
| 4 | <b>429.197990</b> | 215.102633      | 411.187425     | 206.097351       | E    | 1052.482958        | 526.745117        | 1035.456409    | 518.231843       | 1034.472393    | 517.739835       | 9  |
| 5 | 500.235104        | 250.621190      | 482.224539     | 241.615908       | A    | <b>923.440365</b>  | 462.223821        | 906.413816     | 453.710546       | 905.429800     | 453.218538       | 8  |
| 6 | 660.265753        | 330.636515      | 642.255188     | 321.631232       | C    | <b>852.403251</b>  | 426.705264        | 835.376702     | 418.191989       | 834.392686     | 417.699981       | 7  |

|    |             |            |             |            |   |            |            |            |            |            |            |   |
|----|-------------|------------|-------------|------------|---|------------|------------|------------|------------|------------|------------|---|
| 7  | 717.287217  | 359.147247 | 699.276652  | 350.141964 | G | 692.372602 | 346.689939 | 675.346053 | 338.176665 | 674.362037 | 337.684657 | 6 |
| 8  | 816.355631  | 408.681454 | 798.345066  | 399.676171 | V | 635.351138 | 318.179207 | 618.324589 | 309.665933 | 617.340573 | 309.173925 | 5 |
| 9  | 979.418960  | 490.213118 | 961.408395  | 481.207836 | Y | 536.282724 | 268.645000 | 519.256175 | 260.131726 | 518.272159 | 259.639718 | 4 |
| 10 | 1080.466639 | 540.736958 | 1062.456074 | 531.731675 | T | 373.219395 | 187.113335 | 356.192846 | 178.600061 | 355.208830 | 178.108053 | 3 |
| 11 | 1177.519403 | 589.263340 | 1159.508838 | 580.258057 | P | 272.171716 | 136.589496 | 255.145167 | 128.076221 |            |            | 2 |
| 12 |             |            |             |            | R | 175.118952 | 88.063114  | 158.092403 | 79.549839  |            |            | 1 |

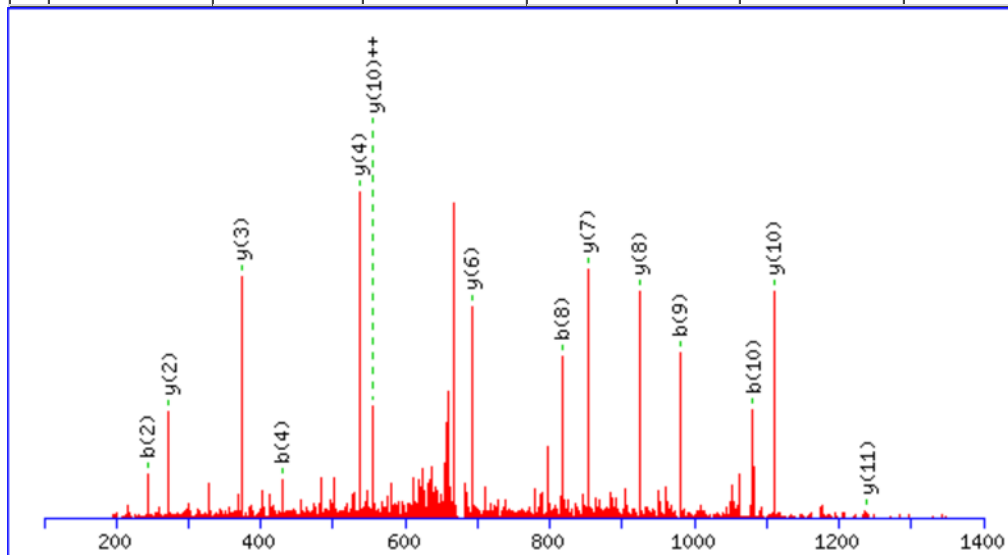

## Peptide View

MS/MS Fragmentation of **TAFYLAEFFVNEAR**

Found in **IPI00023728**, Tax\_Id=9606 Gene\_Symbol=GGH Gamma-glutamyl hydrolase

**Experiment:** 28 - NOPE1 **Fraction:** NOPE1

Match to Query 11217: 1676.813848 from(839.414200,2+)

Title: OECHL100310\_37.22010.22010.2.dta

Data file \\BOROMIR\Masse\Data LTQ-Orbitrap\Chrystelle Lacroix\Etude clinique sJPU\OECHL100310\_37.raw

**Monoisotopic mass of neutral peptide Mr(calc):** 1676.819839 **Fixed modifications:** Carbamidomethyl (C) (apply to specified residues or termini only) **Ions Score:** 71

**Expect:** 9.6e-006 **Matches :** 24/132 fragment ions using 44 most intense peaks ([help](#))

| # | b | b <sup>++</sup> | b <sup>*</sup> | b <sup>*++</sup> | b <sup>0</sup> | b <sup>0++</sup> | Seq. | y | y <sup>++</sup> | y <sup>*</sup> | y <sup>*++</sup> | y <sup>0</sup> | y <sup>0++</sup> | # |
|---|---|-----------------|----------------|------------------|----------------|------------------|------|---|-----------------|----------------|------------------|----------------|------------------|---|
|---|---|-----------------|----------------|------------------|----------------|------------------|------|---|-----------------|----------------|------------------|----------------|------------------|---|



|    |             |            |             |            |             |            |   |             |            |             |            |             |            |    |
|----|-------------|------------|-------------|------------|-------------|------------|---|-------------|------------|-------------|------------|-------------|------------|----|
| 1  | 102.054955  | 51.531116  |             |            | 84.044390   | 42.525833  | T |             |            |             |            |             |            | 14 |
| 2  | 173.092069  | 87.049672  |             |            | 155.081504  | 78.044390  | A | 1576.779456 | 788.893366 | 1559.752907 | 780.380092 | 1558.768891 | 779.888083 | 13 |
| 3  | 320.160483  | 160.583879 |             |            | 302.149918  | 151.578597 | F | 1505.742342 | 753.374809 | 1488.715793 | 744.861535 | 1487.731777 | 744.369527 | 12 |
| 4  | 483.223812  | 242.115544 |             |            | 465.213247  | 233.110261 | Y | 1358.673928 | 679.840602 | 1341.647379 | 671.327328 | 1340.663363 | 670.835319 | 11 |
| 5  | 596.307876  | 298.657576 |             |            | 578.297311  | 289.652293 | L | 1195.610599 | 598.308938 | 1178.584050 | 589.795663 | 1177.600034 | 589.303655 | 10 |
| 6  | 667.344990  | 334.176133 |             |            | 649.334425  | 325.170850 | A | 1082.526535 | 541.766906 | 1065.499986 | 533.253631 | 1064.515970 | 532.761623 | 9  |
| 7  | 796.387583  | 398.697430 |             |            | 778.377018  | 389.692147 | E | 1011.489421 | 506.248349 | 994.462872  | 497.735074 | 993.478856  | 497.243066 | 8  |
| 8  | 943.455997  | 472.231636 |             |            | 925.445432  | 463.226354 | F | 882.446828  | 441.727052 | 865.420279  | 433.213778 | 864.436263  | 432.721770 | 7  |
| 9  | 1090.524411 | 545.765843 |             |            | 1072.513846 | 536.760561 | F | 735.378414  | 368.192845 | 718.351865  | 359.679571 | 717.367849  | 359.187563 | 6  |
| 10 | 1189.592825 | 595.300051 |             |            | 1171.582260 | 586.294768 | V | 588.310000  | 294.658638 | 571.283451  | 286.145364 | 570.299435  | 285.653356 | 5  |
| 11 | 1303.635752 | 652.321514 | 1286.609203 | 643.808240 | 1285.625187 | 643.316231 | N | 489.241586  | 245.124431 | 472.215037  | 236.611156 | 471.231021  | 236.119148 | 4  |
| 12 | 1432.678345 | 716.842811 | 1415.651796 | 708.329536 | 1414.667780 | 707.837528 | E | 375.198659  | 188.102968 | 358.172110  | 179.589693 | 357.188094  | 179.097685 | 3  |
| 13 | 1503.715459 | 752.361368 | 1486.688910 | 743.848093 | 1485.704894 | 743.356085 | A | 246.156066  | 123.581671 | 229.129517  | 115.068396 |             |            | 2  |
| 14 |             |            |             |            |             |            | R | 175.118952  | 88.063114  | 158.092403  | 79.549839  |             |            | 1  |

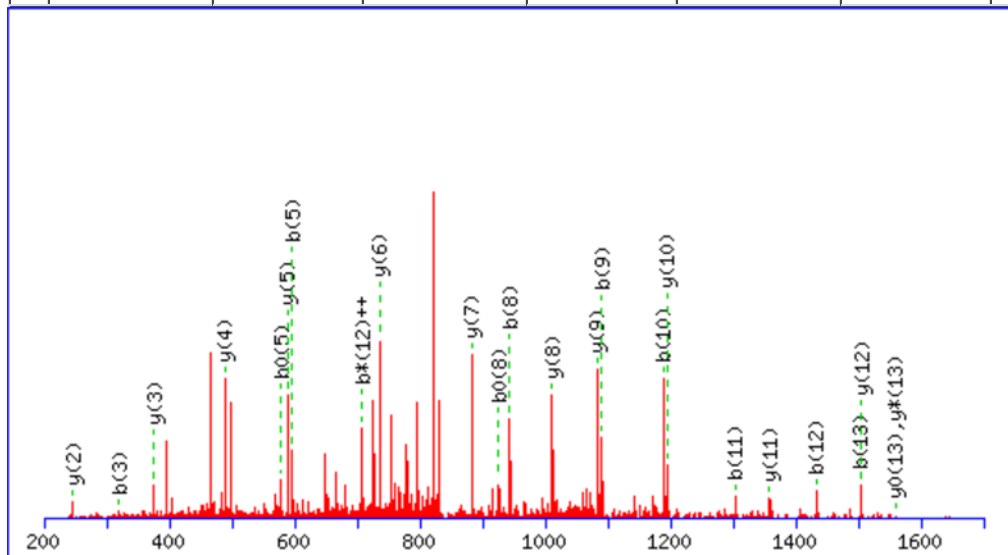

## Peptide View

MS/MS Fragmentation of **AMAGLGQPLPQEELDAMIR**Found in **IP100021536**, Tax\_Id=9606 Gene\_Symbol=CALML5 Calmodulin-like protein 5**Experiment:** 28 - NOPE1 **Fraction:** NOPE1

Match to Query 14313: 2039.019448 from(1020.517000,2+)

Title: OECHL100310\_37.20138.20138.2.dta

Data file \\BOROMIR\Masse\Data LTQ-Orbitrap\Chrystelle Lacroix\Etude clinique sJPU\OECHL100310\_37.raw

**Monoisotopic mass of neutral peptide Mr(calc):** 2039.017944**Fixed modifications:** Carbamidomethyl (C) (apply to specified residues or termini only)**Ions Score:** 66**Expect:** 4.1e-005**Matches :** 34/174 fragment ions using 67 most intense peaks ([help](#))

| #  | b           | b <sup>++</sup> | b <sup>*</sup> | b <sup>*++</sup> | b <sup>0</sup> | b <sup>0++</sup> | Seq. | y           | y <sup>++</sup> | y <sup>*</sup> | y <sup>*++</sup> | y <sup>0</sup> | y <sup>0++</sup> | #  |
|----|-------------|-----------------|----------------|------------------|----------------|------------------|------|-------------|-----------------|----------------|------------------|----------------|------------------|----|
| 1  | 72.044390   | 36.525833       |                |                  |                |                  | A    |             |                 |                |                  |                |                  | 19 |
| 2  | 203.084875  | 102.046075      |                |                  |                |                  | M    | 1968.988147 | 984.997712      | 1951.961598    | 976.484437       | 1950.977582    | 975.992429       | 18 |
| 3  | 274.121989  | 137.564632      |                |                  |                |                  | A    | 1837.947662 | 919.477469      | 1820.921113    | 910.964195       | 1819.937097    | 910.472187       | 17 |
| 4  | 331.143453  | 166.075364      |                |                  |                |                  | G    | 1766.910548 | 883.958912      | 1749.883999    | 875.445638       | 1748.899983    | 874.953630       | 16 |
| 5  | 444.227517  | 222.617396      |                |                  |                |                  | L    | 1709.889084 | 855.448180      | 1692.862535    | 846.934906       | 1691.878519    | 846.442898       | 15 |
| 6  | 501.248981  | 251.128128      |                |                  |                |                  | G    | 1596.805020 | 798.906148      | 1579.778471    | 790.392874       | 1578.794455    | 789.900866       | 14 |
| 7  | 629.307559  | 315.157418      | 612.281010     | 306.644143       |                |                  | Q    | 1539.783556 | 770.395416      | 1522.757007    | 761.882142       | 1521.772991    | 761.390134       | 13 |
| 8  | 726.360323  | 363.683800      | 709.333774     | 355.170525       |                |                  | P    | 1411.724978 | 706.366127      | 1394.698429    | 697.852853       | 1393.714413    | 697.360844       | 12 |
| 9  | 839.444387  | 420.225832      | 822.417838     | 411.712557       |                |                  | L    | 1314.672214 | 657.839745      | 1297.645665    | 649.326471       | 1296.661649    | 648.834462       | 11 |
| 10 | 936.497151  | 468.752214      | 919.470602     | 460.238939       |                |                  | P    | 1201.588150 | 601.297713      | 1184.561601    | 592.784438       | 1183.577585    | 592.292430       | 10 |
| 11 | 1064.555729 | 532.781503      | 1047.529180    | 524.268228       |                |                  | Q    | 1104.535386 | 552.771331      | 1087.508837    | 544.258056       | 1086.524821    | 543.766048       | 9  |
| 12 | 1193.598322 | 597.302799      | 1176.571773    | 588.789525       | 1175.587757    | 588.297517       | E    | 976.476808  | 488.742042      | 959.450259     | 480.228767       | 958.466243     | 479.736759       | 8  |
| 13 | 1322.640915 | 661.824096      | 1305.614366    | 653.310821       | 1304.630350    | 652.818813       | E    | 847.434215  | 424.220746      | 830.407666     | 415.707471       | 829.423650     | 415.215463       | 7  |
| 14 | 1435.724979 | 718.366128      | 1418.698430    | 709.852853       | 1417.714414    | 709.360845       | L    | 718.391622  | 359.699449      | 701.365073     | 351.186174       | 700.381057     | 350.694166       | 6  |
| 15 | 1550.751922 | 775.879599      | 1533.725373    | 767.366325       | 1532.741357    | 766.874317       | D    | 605.307558  | 303.157417      | 588.281009     | 294.644142       | 587.296993     | 294.152134       | 5  |
| 16 | 1621.789036 | 811.398156      | 1604.762487    | 802.884882       | 1603.778471    | 802.392874       | A    | 490.280615  | 245.643945      | 473.254066     | 237.130671       |                |                  | 4  |
| 17 | 1752.829521 | 876.918399      | 1735.802972    | 868.405124       | 1734.818956    | 867.913116       | M    | 419.243501  | 210.125388      | 402.216952     | 201.612114       |                |                  | 3  |
| 18 | 1865.913585 | 933.460431      | 1848.887036    | 924.947156       | 1847.903020    | 924.455148       | I    | 288.203016  | 144.605146      | 271.176467     | 136.091871       |                |                  | 2  |
| 19 |             |                 |                |                  |                |                  | R    | 175.118952  | 88.063114       | 158.092403     | 79.549839        |                |                  | 1  |

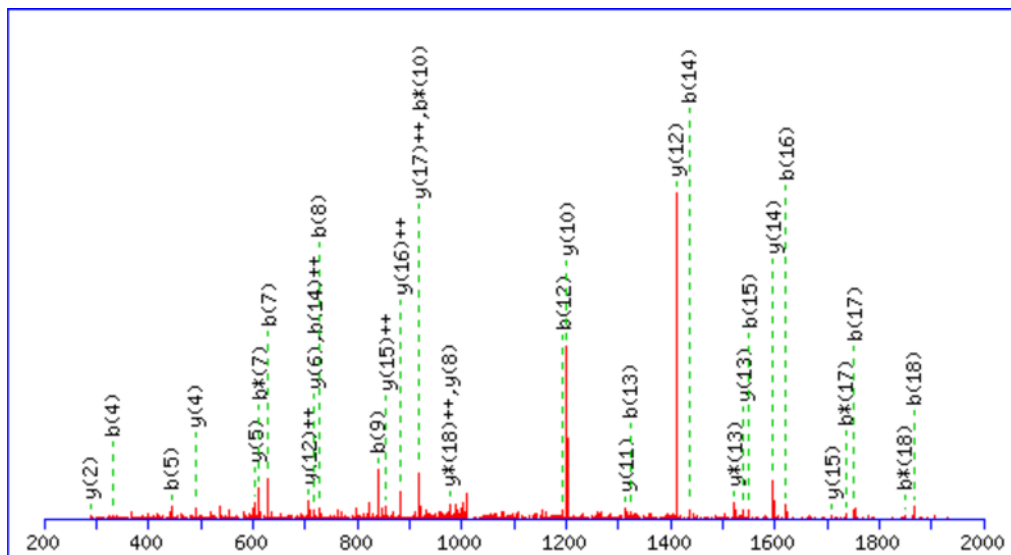

## Peptide View

MS/MS Fragmentation of **NIETIINTFHQYSVK**

Found in **IPI00027462**, Tax\_Id=9606 Gene\_Symbol=S100A9 Protein S100-A9

**Experiment:** 28 - NOPE1 **Fraction:** NOPE1

Match to Query 12536: 1805.933048 from(903.973800,2+)

Title: OECHL100310\_37.20230.20230.2.dta

Data file \\BOROMIR\Masse\Data LTQ-Orbitrap\Chrystelle Lacroix\Etude clinique sJPU\OECHL100310\_37.raw

**Monoisotopic mass of neutral peptide Mr(calc):** 1805.931183 **Fixed modifications:** Carbamidomethyl (C) (apply to specified residues or termini only) **Ions Score:** 60

**Expect:** 0.00012 **Matches :** 45/160 fragment ions using 61 most intense peaks ([help](#))

| # | b                 | b <sup>++</sup> | b <sup>*</sup>    | b <sup>*++</sup> | b <sup>0</sup>    | b <sup>0++</sup>  | Seq. | y                  | y <sup>++</sup>   | y <sup>*</sup>     | y <sup>*++</sup>  | y <sup>0</sup> | y <sup>0++</sup>  | #  |
|---|-------------------|-----------------|-------------------|------------------|-------------------|-------------------|------|--------------------|-------------------|--------------------|-------------------|----------------|-------------------|----|
| 1 | 115.050203        | 58.028740       | 98.023654         | 49.515465        |                   |                   | N    |                    |                   |                    |                   |                |                   | 15 |
| 2 | 228.134267        | 114.570771      | 211.107718        | 106.057497       |                   |                   | I    | <b>1692.895549</b> | 846.951413        | 1675.869000        | 838.438138        | 1674.884984    | 837.946130        | 14 |
| 3 | <b>357.176860</b> | 179.092068      | <b>340.150311</b> | 170.578793       | 339.166295        | 170.086785        | E    | <b>1579.811485</b> | <b>790.409381</b> | <b>1562.784936</b> | <b>781.896106</b> | 1561.800920    | <b>781.404098</b> | 13 |
| 4 | <b>458.224539</b> | 229.615907      | <b>441.197990</b> | 221.102633       | <b>440.213974</b> | 220.610625        | T    | <b>1450.768892</b> | <b>725.888084</b> | <b>1433.742343</b> | 717.374810        | 1432.758327    | 716.882802        | 12 |
| 5 | <b>571.308603</b> | 286.157940      | <b>554.282054</b> | 277.644665       | <b>553.298038</b> | 277.152657        | I    | <b>1349.721213</b> | 675.364245        | 1332.694664        | <b>666.850970</b> | 1331.710648    | <b>666.358962</b> | 11 |
| 6 | <b>684.392667</b> | 342.699972      | <b>667.366118</b> | 334.186697       | <b>666.382102</b> | <b>333.694689</b> | I    | <b>1236.637149</b> | 618.822213        | 1219.610600        | 610.308938        | 1218.626584    | 609.816930        | 10 |

|    |             |            |             |            |             |            |   |             |            |             |            |             |            |   |
|----|-------------|------------|-------------|------------|-------------|------------|---|-------------|------------|-------------|------------|-------------|------------|---|
| 7  | 798.435594  | 399.721435 | 781.409045  | 391.208161 | 780.425029  | 390.716153 | N | 1123.553085 | 562.280181 | 1106.526536 | 553.766906 | 1105.542520 | 553.274898 | 9 |
| 8  | 899.483273  | 450.245275 | 882.456724  | 441.732000 | 881.472708  | 441.239992 | T | 1009.510158 | 505.258717 | 992.483609  | 496.745443 | 991.499593  | 496.253435 | 8 |
| 9  | 1046.551687 | 523.779482 | 1029.525138 | 515.266207 | 1028.541122 | 514.774199 | F | 908.462479  | 454.734878 | 891.435930  | 446.221603 | 890.451914  | 445.729595 | 7 |
| 10 | 1183.610599 | 592.308938 | 1166.584050 | 583.795663 | 1165.600034 | 583.303655 | H | 761.394065  | 381.200671 | 744.367516  | 372.687396 | 743.383500  | 372.195388 | 6 |
| 11 | 1311.669177 | 656.338227 | 1294.642628 | 647.824952 | 1293.658612 | 647.332944 | Q | 624.335153  | 312.671215 | 607.308604  | 304.157940 | 606.324588  | 303.665932 | 5 |
| 12 | 1474.732506 | 737.869891 | 1457.705957 | 729.356617 | 1456.721941 | 728.864609 | Y | 496.276575  | 248.641926 | 479.250026  | 240.128651 | 478.266010  | 239.636643 | 4 |
| 13 | 1561.764534 | 781.385905 | 1544.737985 | 772.872631 | 1543.753969 | 772.380623 | S | 333.213246  | 167.110261 | 316.186697  | 158.596987 | 315.202681  | 158.104979 | 3 |
| 14 | 1660.832948 | 830.920112 | 1643.806399 | 822.406838 | 1642.822383 | 821.914830 | V | 246.181218  | 123.594247 | 229.154669  | 115.080973 |             |            | 2 |
| 15 |             |            |             |            |             |            | K | 147.112804  | 74.060040  | 130.086255  | 65.546765  |             |            | 1 |

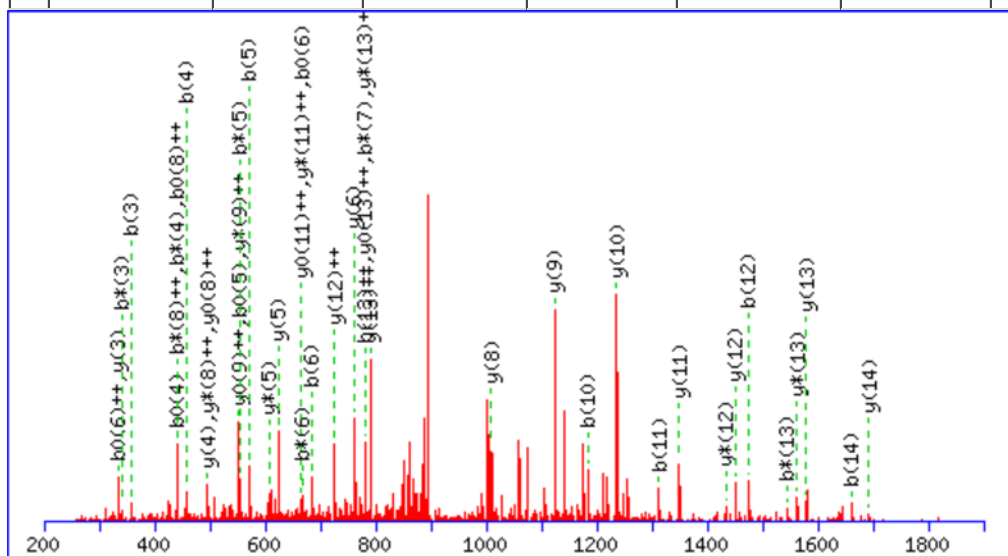

## Peptide View

MS/MS Fragmentation of **YDIALVQEV**R

Found in **IP100031065**, Tax\_Id=9606 Gene\_Symbol=DNASE1 Deoxyribonuclease-1

**Experiment:** 28 - NOPE1 **Fraction:** NOPE1

Match to Query 5550: 1204.646248 from(603.330400,2+)

Title: OECHL100310\_37.15646.15646.2.dta

Data file \\BOROMIR\Masse\Data LTQ-Orbitrap\Chrystelle Lacroix\Etude clinique sJPU\OECHL100310\_37.raw

**Monoisotopic mass of neutral peptide Mr(calc):** 1204.645172 **Fixed modifications:** Carbamidomethyl (C) (apply to specified residues or termini only) **Ions Score:** 56  
**Expect:** 0.00018 **Matches :** 18/90 fragment ions using 30 most intense peaks ([help](#))

| #  | b                  | b <sup>++</sup> | b*                 | b <sup>***</sup> | b <sup>0</sup> | b <sup>0++</sup>  | Seq. | y                 | y <sup>++</sup>   | y*          | y <sup>***</sup> | y <sup>0</sup> | y <sup>0++</sup> | #  |
|----|--------------------|-----------------|--------------------|------------------|----------------|-------------------|------|-------------------|-------------------|-------------|------------------|----------------|------------------|----|
| 1  | 164.070605         | 82.538940       |                    |                  |                |                   | Y    |                   |                   |             |                  |                |                  | 10 |
| 2  | <b>279.097548</b>  | 140.052412      |                    |                  | 261.086983     | 131.047130        | D    | 1042.589136       | 521.798206        | 1025.562587 | 513.284932       | 1024.578571    | 512.792924       | 9  |
| 3  | 392.181612         | 196.594444      |                    |                  | 374.171047     | 187.589162        | I    | <b>927.562193</b> | <b>464.284735</b> | 910.535644  | 455.771460       | 909.551628     | 455.279452       | 8  |
| 4  | <b>463.218726</b>  | 232.113001      |                    |                  | 445.208161     | 223.107719        | A    | <b>814.478129</b> | 407.742703        | 797.451580  | 399.229428       | 796.467564     | 398.737420       | 7  |
| 5  | <b>576.302790</b>  | 288.655033      |                    |                  | 558.292225     | <b>279.649751</b> | L    | <b>743.441015</b> | 372.224146        | 726.414466  | 363.710871       | 725.430450     | 363.218863       | 6  |
| 6  | <b>675.371204</b>  | 338.189240      |                    |                  | 657.360639     | 329.183958        | V    | <b>630.356951</b> | 315.682114        | 613.330402  | 307.168839       | 612.346386     | 306.676831       | 5  |
| 7  | <b>803.429782</b>  | 402.218529      | 786.403233         | 393.705255       | 785.419217     | 393.213247        | Q    | <b>531.288537</b> | 266.147907        | 514.261988  | 257.634632       | 513.277972     | 257.142624       | 4  |
| 8  | <b>932.472375</b>  | 466.739826      | 915.445826         | 458.226551       | 914.461810     | 457.734543        | E    | <b>403.229959</b> | 202.118618        | 386.203410  | 193.605343       | 385.219394     | 193.113335       | 3  |
| 9  | <b>1031.540789</b> | 516.274033      | <b>1014.514240</b> | 507.760758       | 1013.530224    | 507.268750        | V    | <b>274.187366</b> | 137.597321        | 257.160817  | 129.084047       |                |                  | 2  |
| 10 |                    |                 |                    |                  |                |                   | R    | <b>175.118952</b> | 88.063114         | 158.092403  | 79.549839        |                |                  | 1  |

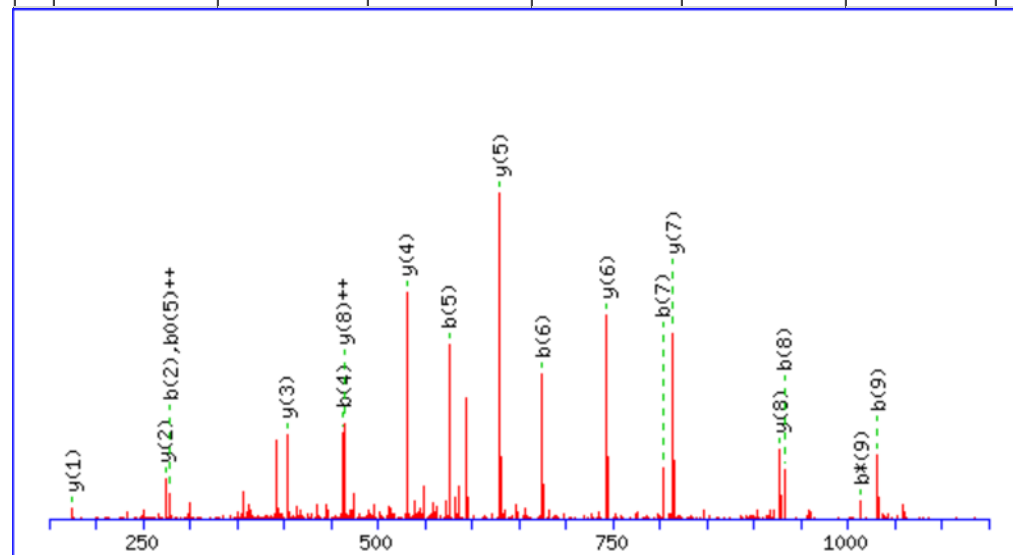

## Peptide View

MS/MS Fragmentation of **DTDTGALLFIGK**

Found in **IPI00006114**, Tax\_Id=9606 Gene\_Symbol=SERPINF1 Pigment epithelium-derived factor

**Experiment: 58 - PyE-1 Fraction: PyE-1**

Match to Query 6965: 1249.656048 from(625.835300,2+)

Title: OECHL100310\_35.17340.17340.2.dta

Data file \\BOROMIR\Masse\Data LTQ-Orbitrap\Chrystelle Lacroix\Etude clinique sJPU\OECHL100310\_35.raw

**Monoisotopic mass of neutral peptide Mr(calc): 1249.655426**Fixed modifications: Carbamidomethyl (C) (apply to specified residues or termini only)**Ions Score: 81****Expect: 6.5e-007**Matches : 18/94 fragment ions using 22 most intense peaks ([help](#))

| #  | b                  | b <sup>++</sup>   | b <sup>0</sup> | b <sup>0++</sup>  | Seq. | y                  | y <sup>++</sup>   | y*          | y* <sup>++</sup> | y <sup>0</sup> | y <sup>0++</sup> | #  |
|----|--------------------|-------------------|----------------|-------------------|------|--------------------|-------------------|-------------|------------------|----------------|------------------|----|
| 1  | 116.034219         | 58.520748         | 98.023654      | 49.515465         | D    |                    |                   |             |                  |                |                  | 12 |
| 2  | <b>217.081898</b>  | 109.044587        | 199.071333     | 100.039304        | T    | 1135.635753        | 568.321514        | 1118.609204 | 559.808240       | 1117.625188    | 559.316232       | 11 |
| 3  | 332.108841         | 166.558058        | 314.098276     | 157.552776        | D    | <b>1034.588074</b> | 517.797675        | 1017.561525 | 509.284401       | 1016.577509    | 508.792393       | 10 |
| 4  | 433.156520         | <b>217.081898</b> | 415.145955     | 208.076616        | T    | <b>919.561131</b>  | 460.284203        | 902.534582  | 451.770929       | 901.550566     | 451.278921       | 9  |
| 5  | 490.177984         | 245.592630        | 472.167419     | 236.587347        | G    | <b>818.513452</b>  | 409.760364        | 801.486903  | 401.247089       |                |                  | 8  |
| 6  | <b>561.215098</b>  | 281.111187        | 543.204533     | 272.105905        | A    | <b>761.491988</b>  | 381.249632        | 744.465439  | 372.736357       |                |                  | 7  |
| 7  | 674.299162         | 337.653219        | 656.288597     | 328.647937        | L    | <b>690.454874</b>  | <b>345.731075</b> | 673.428325  | 337.217800       |                |                  | 6  |
| 8  | <b>787.383226</b>  | 394.195251        | 769.372661     | <b>385.189969</b> | L    | <b>577.370810</b>  | 289.189043        | 560.344261  | 280.675768       |                |                  | 5  |
| 9  | <b>934.451640</b>  | 467.729458        | 916.441075     | 458.724176        | F    | <b>464.286746</b>  | 232.647011        | 447.260197  | 224.133736       |                |                  | 4  |
| 10 | <b>1047.535704</b> | 524.271490        | 1029.525139    | 515.266207        | I    | <b>317.218332</b>  | 159.112804        | 300.191783  | 150.599529       |                |                  | 3  |
| 11 | <b>1104.557168</b> | 552.782222        | 1086.546603    | 543.776939        | G    | <b>204.134268</b>  | 102.570772        | 187.107719  | 94.057497        |                |                  | 2  |
| 12 |                    |                   |                |                   | K    | 147.112804         | 74.060040         | 130.086255  | 65.546765        |                |                  | 1  |

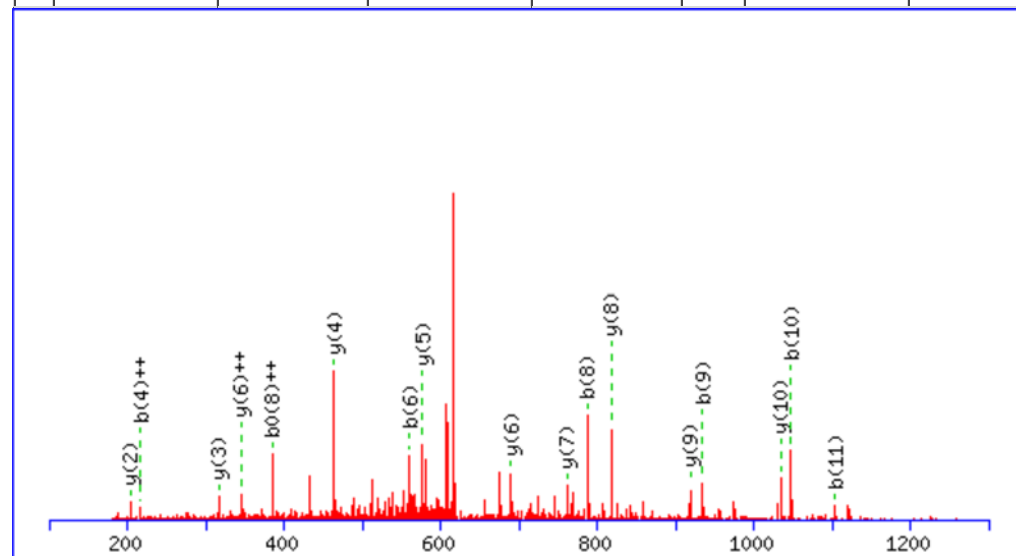

## Peptide View

MS/MS Fragmentation of **CLQCQMCDPAMGLR**

Found in **IP100024331**, Tax\_Id=9606 Gene\_Symbol=TNFRSF14 Tumor necrosis factor receptor superfamily member 14

**Experiment:** 58 - PyE-1 **Fraction:** PyE-1

Match to Query 12648: 1738.707448 from(870.361000,2+)

Title: OECHL100310\_35.13645.13645.2.dta

Data file \\BOROMIR\Masse\Data LTQ-Orbitrap\Chrystelle Lacroix\Etude clinique sJPU\OECHL100310\_35.raw

**Monoisotopic mass of neutral peptide Mr(calc):** 1738.708160 **Fixed modifications:** Carbamidomethyl (C) (apply to specified residues or termini only) **Ions Score:** 80

**Expect:** 2.1e-007 **Matches :** 32/126 fragment ions using 44 most intense peaks ([help](#))

| #  | b                  | b <sup>++</sup>   | b*                | b <sup>*++</sup>  | b <sup>0</sup>     | b <sup>0++</sup> | Seq. | y                  | y <sup>++</sup>   | y*                 | y <sup>*++</sup>  | y <sup>0</sup> | y <sup>0++</sup>  | #  |
|----|--------------------|-------------------|-------------------|-------------------|--------------------|------------------|------|--------------------|-------------------|--------------------|-------------------|----------------|-------------------|----|
| 1  | 161.037925         | 81.022600         |                   |                   |                    |                  | C    |                    |                   |                    |                   |                |                   | 14 |
| 2  | <b>274.121989</b>  | 137.564632        |                   |                   |                    |                  | L    | 1579.684789        | 790.346032        | 1562.658240        | 781.832758        | 1561.674224    | 781.340750        | 13 |
| 3  | <b>402.180567</b>  | 201.593921        | <b>385.154018</b> | 193.080647        |                    |                  | Q    | <b>1466.600725</b> | <b>733.804001</b> | 1449.574176        | <b>725.290726</b> | 1448.590160    | <b>724.798718</b> | 12 |
| 4  | <b>562.211216</b>  | 281.609246        | 545.184667        | 273.095972        |                    |                  | C    | <b>1338.542147</b> | 669.774711        | 1321.515598        | 661.261437        | 1320.531582    | 660.769429        | 11 |
| 5  | <b>690.269794</b>  | <b>345.638535</b> | 673.243245        | 337.125261        |                    |                  | Q    | <b>1178.511498</b> | 589.759387        | <b>1161.484949</b> | 581.246113        | 1160.500933    | 580.754105        | 10 |
| 6  | <b>821.310279</b>  | 411.158778        | 804.283730        | <b>402.645503</b> |                    |                  | M    | <b>1050.452920</b> | 525.730098        | 1033.426371        | 517.216824        | 1032.442355    | 516.724815        | 9  |
| 7  | <b>981.340928</b>  | 491.174102        | <b>964.314379</b> | 482.660828        |                    |                  | C    | <b>919.412435</b>  | 460.209856        | 902.385886         | 451.696581        | 901.401870     | 451.204573        | 8  |
| 8  | <b>1096.367871</b> | 548.687574        | 1079.341322       | 540.174299        | 1078.357306        | 539.682291       | D    | <b>759.381786</b>  | 380.194531        | 742.355237         | 371.681256        | 741.371221     | 371.189248        | 7  |
| 9  | 1193.420635        | 597.213956        | 1176.394086       | 588.700681        | 1175.410070        | 588.208673       | P    | <b>644.354843</b>  | 322.681059        | 627.328294         | 314.167785        |                |                   | 6  |
| 10 | <b>1264.457749</b> | 632.732513        | 1247.431200       | 624.219238        | 1246.447184        | 623.727230       | A    | 547.302079         | <b>274.154677</b> | 530.275530         | 265.641403        |                |                   | 5  |
| 11 | <b>1395.498234</b> | 698.252755        | 1378.471685       | 689.739481        | <b>1377.487669</b> | 689.247473       | M    | <b>476.264965</b>  | 238.636120        | 459.238416         | 230.122846        |                |                   | 4  |
| 12 | <b>1452.519698</b> | 726.763487        | 1435.493149       | 718.250213        | 1434.509133        | 717.758205       | G    | <b>345.224480</b>  | 173.115878        | 328.197931         | 164.602603        |                |                   | 3  |
| 13 | <b>1565.603762</b> | 783.305519        | 1548.577213       | 774.792245        | <b>1547.593197</b> | 774.300236       | L    | <b>288.203016</b>  | 144.605146        | 271.176467         | 136.091871        |                |                   | 2  |
| 14 |                    |                   |                   |                   |                    |                  | R    | 175.118952         | 88.063114         | 158.092403         | 79.549839         |                |                   | 1  |

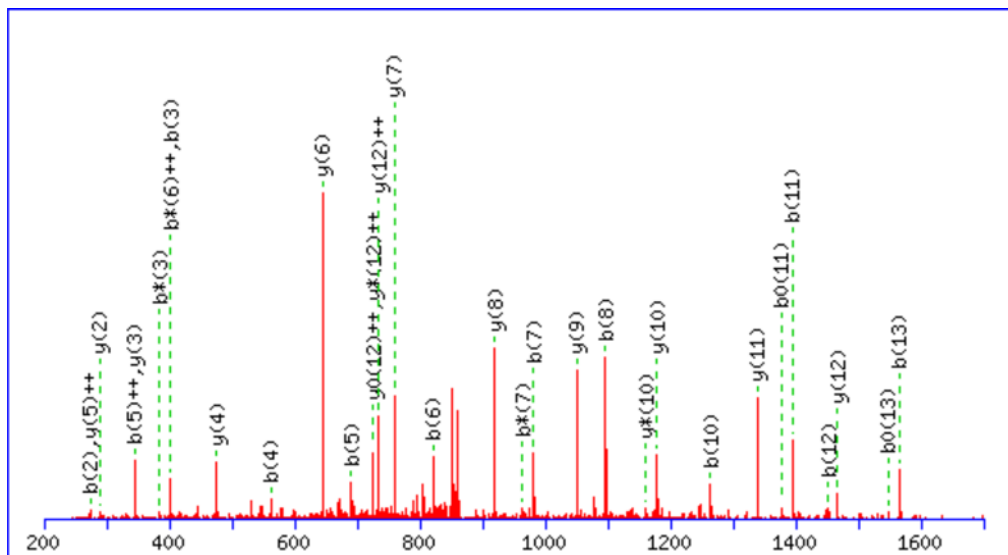

## Peptide View

MS/MS Fragmentation of **AVGLLTVISK**

Found in **IPI00013446**, Tax\_Id=9606 Gene\_Symbol=PSCA Prostate stem cell antigen

**Experiment:** 58 - PyE-1 **Fraction:** PyE-1

Match to Query 3194: 999.634048 from(500.824300,2+)

Title: OECHL100310\_35.16575.16575.2.dta

Data file \\BOROMIR\Masse\Data LTQ-Orbitrap\Chrystelle Lacroix\Etude clinique sJPU\OECHL100310\_35.raw

**Monoisotopic mass of neutral peptide Mr(calc):** 999.632828 **Fixed modifications:** Carbamidomethyl (C) (apply to specified residues or termini only) **Ions Score:** 65

**Expect:** 3.8e-006 **Matches :** 16/78 fragment ions using 24 most intense peaks ([help](#))

| # | b                 | b <sup>++</sup>   | b <sup>0</sup> | b <sup>0++</sup> | Seq. | y                 | y <sup>++</sup>   | y*         | y <sup>*++</sup> | y <sup>0</sup> | y <sup>0++</sup> | #  |
|---|-------------------|-------------------|----------------|------------------|------|-------------------|-------------------|------------|------------------|----------------|------------------|----|
| 1 | 72.044390         | 36.525833         |                |                  | A    |                   |                   |            |                  |                |                  | 10 |
| 2 | <b>171.112804</b> | 86.060040         |                |                  | V    | 929.602995        | 465.305136        | 912.576446 | 456.791861       | 911.592430     | 456.299853       | 9  |
| 3 | <b>228.134268</b> | 114.570772        |                |                  | G    | <b>830.534581</b> | <b>415.770929</b> | 813.508032 | 407.257654       | 812.524016     | 406.765646       | 8  |
| 4 | <b>341.218332</b> | <b>171.112804</b> |                |                  | L    | 773.513117        | 387.260197        | 756.486568 | 378.746922       | 755.502552     | 378.254914       | 7  |
| 5 | <b>454.302396</b> | 227.654836        |                |                  | L    | <b>660.429053</b> | 330.718165        | 643.402504 | 322.204890       | 642.418488     | 321.712882       | 6  |
| 6 | <b>555.350075</b> | 278.178676        | 537.339510     | 269.173393       | T    | <b>547.344989</b> | 274.176133        | 530.318440 | 265.662858       | 529.334424     | 265.170850       | 5  |



|    |            |            |            |            |   |            |            |            |            |            |            |   |
|----|------------|------------|------------|------------|---|------------|------------|------------|------------|------------|------------|---|
| 7  | 654.418489 | 327.712883 | 636.407924 | 318.707600 | V | 446.297310 | 223.652293 | 429.270761 | 215.139018 | 428.286745 | 214.647010 | 4 |
| 8  | 767.502553 | 384.254915 | 749.491988 | 375.249632 | I | 347.228896 | 174.118086 | 330.202347 | 165.604811 | 329.218331 | 165.112803 | 3 |
| 9  | 854.534581 | 427.770929 | 836.524016 | 418.765646 | S | 234.144832 | 117.576054 | 217.118283 | 109.062779 | 216.134267 | 108.570771 | 2 |
| 10 |            |            |            |            | K | 147.112804 | 74.060040  | 130.086255 | 65.546765  |            |            | 1 |

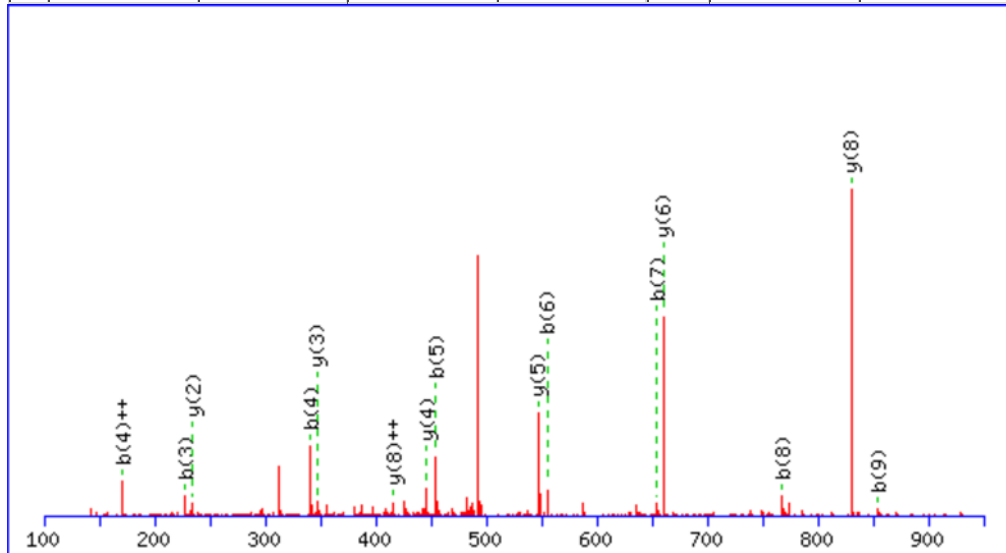

## Peptide View

MS/MS Fragmentation of **IESVLSSSGKR**

Found in **IP100018236**, Tax\_Id=9606 Gene\_Symbol=GM2A Ganglioside GM2 activator

**Experiment:** 58 - PyE-1 **Fraction:** PyE-1

Match to Query 5561: 1161.636048 from(581.825300,2+)

Title: OECHL100310\_35.4536.4536.2.dta

Data file \\BOROMIR\Masse\Data LTQ-Orbitrap\Chrystelle Lacroix\Etude clinique sJPU\OECHL100310\_35.raw

**Monoisotopic mass of neutral peptide Mr(calc):** 1161.635330 **Fixed modifications:** Carbamidomethyl (C) (apply to specified residues or termini only) **Ions Score:** 77

**Expect:** 1.3e-006 **Matches :** 27/94 fragment ions using 36 most intense peaks ([help](#))

| # | b                 | b <sup>++</sup> | b <sup>*</sup> | b <sup>*++</sup> | b <sup>0</sup> | b <sup>0++</sup> | Seq. | y                  | y <sup>++</sup>   | y <sup>*</sup> | y <sup>*++</sup> | y <sup>0</sup> | y <sup>0++</sup> | #  |
|---|-------------------|-----------------|----------------|------------------|----------------|------------------|------|--------------------|-------------------|----------------|------------------|----------------|------------------|----|
| 1 | 114.091340        | 57.549308       |                |                  |                |                  | I    |                    |                   |                |                  |                |                  | 11 |
| 2 | <b>243.133933</b> | 122.070605      |                |                  | 225.123368     | 113.065322       | E    | <b>1049.558562</b> | <b>525.282919</b> | 1032.532013    | 516.769645       | 1031.547997    | 516.277637       | 10 |

|    |                   |                   |            |            |                   |            |   |                   |                   |                   |                   |                   |                   |          |
|----|-------------------|-------------------|------------|------------|-------------------|------------|---|-------------------|-------------------|-------------------|-------------------|-------------------|-------------------|----------|
| 3  | <b>330.165961</b> | 165.586618        |            |            | <b>312.155396</b> | 156.581336 | S | <b>920.515969</b> | <b>460.761623</b> | <b>903.489420</b> | 452.248348        | <b>902.505404</b> | 451.756340        | <b>9</b> |
| 4  | <b>429.234375</b> | <b>215.120826</b> |            |            | <b>411.223810</b> | 206.115543 | V | <b>833.483941</b> | 417.245609        | 816.457392        | 408.732334        | 815.473376        | 408.240326        | <b>8</b> |
| 5  | 542.318439        | 271.662858        |            |            | 524.307874        | 262.657575 | L | <b>734.415527</b> | <b>367.711402</b> | <b>717.388978</b> | 359.198127        | 716.404962        | 358.706119        | <b>7</b> |
| 6  | 629.350467        | 315.178872        |            |            | <b>611.339902</b> | 306.173589 | S | <b>621.331463</b> | 311.169370        | 604.304914        | 302.656095        | 603.320898        | 302.164087        | <b>6</b> |
| 7  | 716.382495        | 358.694886        |            |            | 698.371930        | 349.689603 | S | <b>534.299435</b> | 267.653356        | 517.272886        | 259.140081        | 516.288870        | 258.648073        | <b>5</b> |
| 8  | 803.414523        | 402.210899        |            |            | <b>785.403958</b> | 393.205617 | S | <b>447.267407</b> | 224.137342        | 430.240858        | <b>215.624067</b> | <b>429.256842</b> | <b>215.132059</b> | <b>4</b> |
| 9  | 860.435987        | 430.721632        |            |            | 842.425422        | 421.716349 | G | <b>360.235379</b> | 180.621328        | 343.208830        | 172.108053        |                   |                   | <b>3</b> |
| 10 | <b>988.530950</b> | 494.769113        | 971.504401 | 486.255838 | 970.520385        | 485.763830 | K | 303.213915        | 152.110596        | 286.187366        | 143.597321        |                   |                   | <b>2</b> |
| 11 |                   |                   |            |            |                   |            | R | <b>175.118952</b> | 88.063114         | 158.092403        | 79.549840         |                   |                   | <b>1</b> |

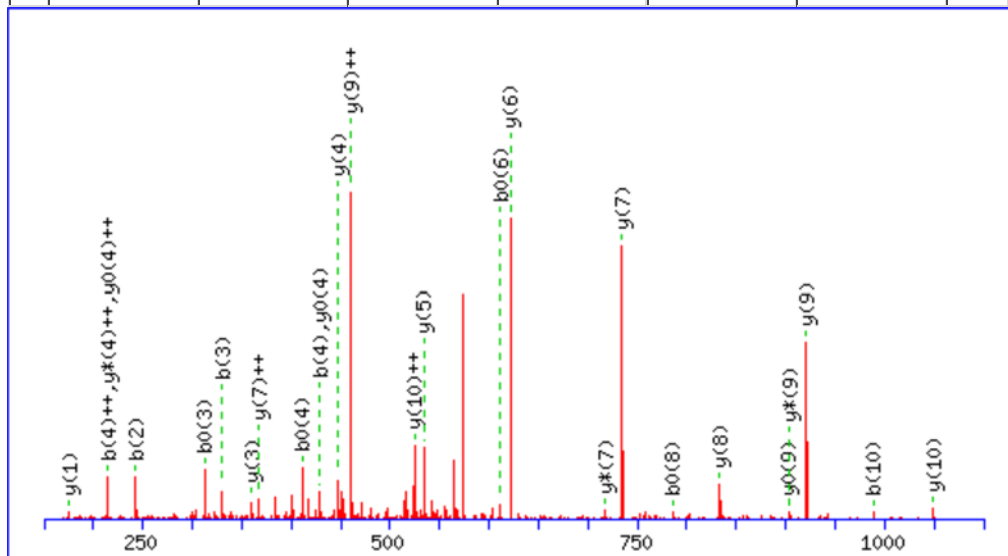

## Peptide View

MS/MS Fragmentation of **AHGQESAIFNEVAPGYFSR**

Found in **IP100170635**, Tax\_Id=9606 Gene\_Symbol=SECTM1 Secreted and transmembrane protein 1

**Experiment:** 58 - PyE-1 **Fraction:** PyE-1

Match to Query 15225: 2078.983448 from(1040.499000,2+)

Title: OECHL100310\_35.16475.16475.2.dta

Data file \\BOROMIR\Masse\Data LTQ-Orbitrap\Chrystelle Lacroix\Etude clinique sJPU\OECHL100310\_35.raw

**Monoisotopic mass of neutral peptide Mr(calc):** 2078.980988**Fixed modifications:** Carbamidomethyl (C) (apply to specified residues or termini only)**Ions Score:** 101  
**Expect:** 1.3e-008**Matches :** 32/200 fragment ions using 51 most intense peaks ([help](#))

| #  | b                  | b <sup>++</sup>   | b*                 | b <sup>*++</sup>  | b <sup>0</sup>    | b <sup>0++</sup>  | Seq. | y                  | y <sup>++</sup> | y*                 | y <sup>*++</sup>  | y <sup>0</sup>     | y <sup>0++</sup> | #  |
|----|--------------------|-------------------|--------------------|-------------------|-------------------|-------------------|------|--------------------|-----------------|--------------------|-------------------|--------------------|------------------|----|
| 1  | 72.044390          | 36.525833         |                    |                   |                   |                   | A    |                    |                 |                    |                   |                    |                  | 19 |
| 2  | 209.103302         | 105.055289        |                    |                   |                   |                   | H    | 2008.951166        | 1004.979221     | 1991.924617        | 996.465947        | 1990.940601        | 995.973939       | 18 |
| 3  | 266.124766         | 133.566021        |                    |                   |                   |                   | G    | <b>1871.892254</b> | 936.449765      | 1854.865705        | 927.936491        | 1853.881689        | 927.444483       | 17 |
| 4  | <b>394.183344</b>  | 197.595310        | 377.156795         | 189.082035        |                   |                   | Q    | <b>1814.870790</b> | 907.939033      | <b>1797.844241</b> | 899.425759        | 1796.860225        | 898.933751       | 16 |
| 5  | <b>523.225937</b>  | 262.116607        | 506.199388         | 253.603332        | 505.215372        | 253.111324        | E    | <b>1686.812212</b> | 843.909744      | 1669.785663        | 835.396470        | 1668.801647        | 834.904462       | 15 |
| 6  | 610.257965         | 305.632621        | 593.231416         | 297.119346        | 592.247400        | 296.627338        | S    | <b>1557.769619</b> | 779.388448      | 1540.743070        | 770.875173        | <b>1539.759054</b> | 770.383165       | 14 |
| 7  | <b>681.295079</b>  | 341.151178        | 664.268530         | <b>332.637903</b> | <b>663.284514</b> | <b>332.145895</b> | A    | <b>1470.737591</b> | 735.872434      | 1453.711042        | <b>727.359159</b> | 1452.727026        | 726.867151       | 13 |
| 8  | 794.379143         | 397.693210        | 777.352594         | 389.179935        | 776.368578        | 388.687927        | I    | <b>1399.700477</b> | 700.353877      | 1382.673928        | 691.840602        | 1381.689912        | 691.348594       | 12 |
| 9  | <b>941.447557</b>  | 471.227417        | 924.421008         | 462.714142        | 923.436992        | 462.222134        | F    | <b>1286.616413</b> | 643.811845      | 1269.589864        | 635.298570        | 1268.605848        | 634.806562       | 11 |
| 10 | 1055.490484        | 528.248880        | 1038.463935        | 519.735606        | 1037.479919       | 519.243597        | N    | <b>1139.547999</b> | 570.277638      | 1122.521450        | 561.764363        | 1121.537434        | 561.272355       | 10 |
| 11 | <b>1184.533077</b> | 592.770176        | 1167.506528        | 584.256902        | 1166.522512       | 583.764894        | E    | <b>1025.505072</b> | 513.256174      | 1008.478523        | 504.742900        | 1007.494507        | 504.250892       | 9  |
| 12 | <b>1283.601491</b> | 642.304383        | 1266.574942        | 633.791109        | 1265.590926       | 633.299101        | V    | <b>896.462479</b>  | 448.734878      | 879.435930         | 440.221603        | 878.451914         | 439.729595       | 8  |
| 13 | <b>1354.638605</b> | 677.822940        | 1337.612056        | 669.309666        | 1336.628040       | 668.817658        | A    | <b>797.394065</b>  | 399.200671      | 780.367516         | 390.687396        | 779.383500         | 390.195388       | 7  |
| 14 | <b>1451.691369</b> | <b>726.349322</b> | 1434.664820        | 717.836048        | 1433.680804       | 717.344040        | P    | <b>726.356951</b>  | 363.682114      | 709.330402         | 355.168839        | 708.346386         | 354.676831       | 6  |
| 15 | 1508.712833        | 754.860054        | 1491.686284        | 746.346780        | 1490.702268       | 745.854772        | G    | <b>629.304187</b>  | 315.155732      | 612.277638         | 306.642457        | 611.293622         | 306.150449       | 5  |
| 16 | <b>1671.776162</b> | 836.391719        | 1654.749613        | 827.878445        | 1653.765597       | 827.386436        | Y    | 572.282723         | 286.645000      | 555.256174         | 278.131725        | 554.272158         | 277.639717       | 4  |
| 17 | 1818.844576        | 909.925926        | <b>1801.818027</b> | 901.412652        | 1800.834011       | 900.920643        | F    | <b>409.219394</b>  | 205.113335      | 392.192845         | 196.600061        | 391.208829         | 196.108053       | 3  |
| 18 | <b>1905.876604</b> | 953.441940        | 1888.850055        | 944.928666        | 1887.866039       | 944.436658        | S    | 262.150980         | 131.579128      | 245.124431         | 123.065854        | 244.140415         | 122.573846       | 2  |
| 19 |                    |                   |                    |                   |                   |                   | R    | 175.118952         | 88.063114       | 158.092403         | 79.549840         |                    |                  | 1  |

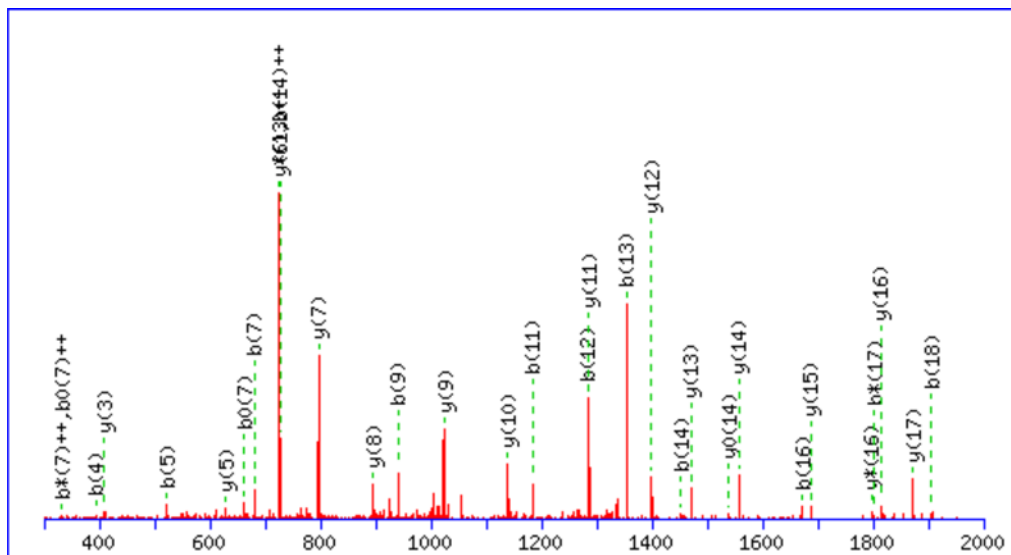

## Peptide View

MS/MS Fragmentation of **AISSIGLECQSVTSR**

Found in **IPI00006988**, Tax\_Id=9606 Gene\_Symbol=RETN Resistin

**Experiment:** 58 - PyE-1 **Fraction:** PyE-1

Match to Query 11033: 1606.801448 from(804.408000,2+)

Title: OECHL100310\_35.11799.11799.2.dta

Data file \\BOROMIR\Masse\Data LTQ-Orbitrap\Chrystelle Lacroix\Etude clinique sJPU\OECHL100310\_35.raw

**Monoisotopic mass of neutral peptide Mr(calc):** 1606.798462 **Fixed modifications:** Carbamidomethyl (C) (apply to specified residues or termini only) **Ions Score:** 80

**Expect:** 1.5e-006 **Matches :** 36/144 fragment ions using 66 most intense peaks ([help](#))

| # | b                 | b <sup>++</sup> | b* | b <sup>*++</sup> | b <sup>0</sup>    | b <sup>0++</sup> | Seq.     | y                  | y <sup>++</sup>   | y*                 | y <sup>*++</sup> | y <sup>0</sup> | y <sup>0++</sup>  | #         |
|---|-------------------|-----------------|----|------------------|-------------------|------------------|----------|--------------------|-------------------|--------------------|------------------|----------------|-------------------|-----------|
| 1 | 72.044390         | 36.525833       |    |                  |                   |                  | <b>A</b> |                    |                   |                    |                  |                |                   | <b>15</b> |
| 2 | 185.128454        | 93.067865       |    |                  |                   |                  | <b>I</b> | 1536.768633        | 768.887955        | 1519.742084        | 760.374680       | 1518.758068    | 759.882672        | <b>14</b> |
| 3 | 272.160482        | 136.583879      |    |                  | 254.149917        | 127.578596       | <b>S</b> | <b>1423.684569</b> | <b>712.345923</b> | 1406.658020        | 703.832648       | 1405.674004    | <b>703.340640</b> | <b>13</b> |
| 4 | <b>359.192510</b> | 180.099893      |    |                  | <b>341.181945</b> | 171.094610       | <b>S</b> | <b>1336.652541</b> | <b>668.829909</b> | 1319.625992        | 660.316634       | 1318.641976    | 659.824626        | <b>12</b> |
| 5 | <b>472.276574</b> | 236.641925      |    |                  | <b>454.266009</b> | 227.636642       | <b>I</b> | <b>1249.620513</b> | <b>625.313895</b> | 1232.593964        | 616.800620       | 1231.609948    | 616.308612        | <b>11</b> |
| 6 | 529.298038        | 265.152657      |    |                  | 511.287473        | 256.147375       | <b>G</b> | <b>1136.536449</b> | 568.771863        | <b>1119.509900</b> | 560.258588       | 1118.525884    | 559.766580        | <b>10</b> |

|    |                    |            |                    |            |                    |                   |            |          |                    |            |                   |            |                    |            |          |
|----|--------------------|------------|--------------------|------------|--------------------|-------------------|------------|----------|--------------------|------------|-------------------|------------|--------------------|------------|----------|
| 7  | <b>642.382102</b>  | 321.694689 |                    |            |                    | <b>624.371537</b> | 312.689407 | <b>L</b> | <b>1079.514985</b> | 540.261131 | 1062.488436       | 531.747856 | <b>1061.504420</b> | 531.255848 | <b>9</b> |
| 8  | 771.424695         | 386.215986 |                    |            |                    | 753.414130        | 377.210703 | <b>E</b> | <b>966.430921</b>  | 483.719099 | <b>949.404372</b> | 475.205824 | 948.420356         | 474.713816 | <b>8</b> |
| 9  | <b>931.455344</b>  | 466.231310 |                    |            |                    | 913.444779        | 457.226028 | <b>C</b> | <b>837.388328</b>  | 419.197802 | 820.361779        | 410.684528 | 819.377763         | 410.192520 | <b>7</b> |
| 10 | <b>1059.513922</b> | 530.260599 | 1042.487373        | 521.747325 | 1041.503357        | 521.255317        |            | <b>Q</b> | <b>677.357679</b>  | 339.182478 | 660.331130        | 330.669203 | 659.347114         | 330.177195 | <b>6</b> |
| 11 | <b>1146.545950</b> | 573.776613 | 1129.519401        | 565.263339 | <b>1128.535385</b> | 564.771331        |            | <b>S</b> | <b>549.299101</b>  | 275.153189 | 532.272552        | 266.639914 | 531.288536         | 266.147906 | <b>5</b> |
| 12 | <b>1245.614364</b> | 623.310820 | <b>1228.587815</b> | 614.797546 | <b>1227.603799</b> | 614.305538        |            | <b>V</b> | <b>462.267073</b>  | 231.637175 | 445.240524        | 223.123900 | <b>444.256508</b>  | 222.631892 | <b>4</b> |
| 13 | <b>1346.662043</b> | 673.834660 | 1329.635494        | 665.321385 | <b>1328.651478</b> | 664.829377        |            | <b>T</b> | <b>363.198659</b>  | 182.102968 | 346.172110        | 173.589693 | 345.188094         | 173.097685 | <b>3</b> |
| 14 | <b>1433.694071</b> | 717.350674 | 1416.667522        | 708.837399 | 1415.683506        | 708.345391        |            | <b>S</b> | <b>262.150980</b>  | 131.579128 | 245.124431        | 123.065854 | 244.140415         | 122.573846 | <b>2</b> |
| 15 |                    |            |                    |            |                    |                   |            | <b>R</b> | 175.118952         | 88.063114  | 158.092403        | 79.549839  |                    |            | <b>1</b> |

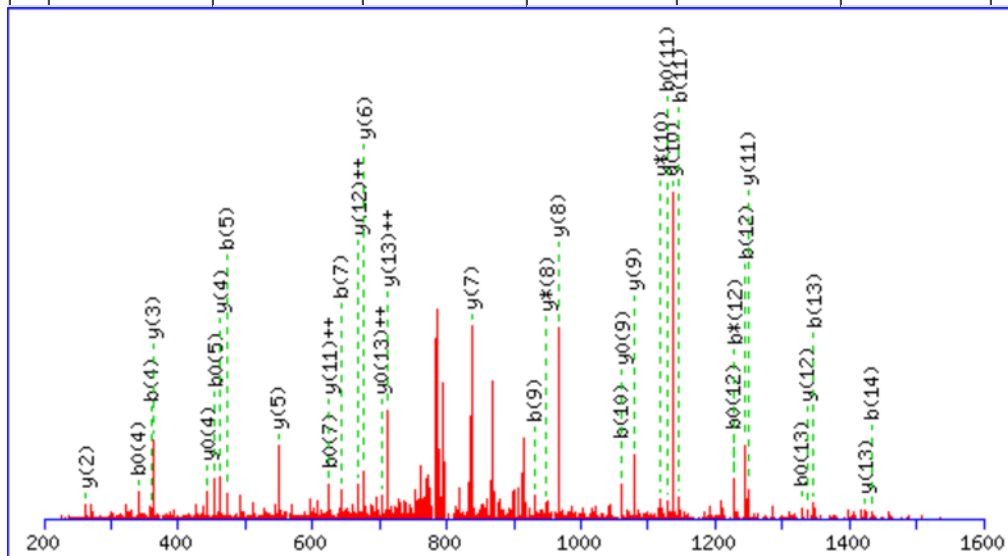

## Peptide View

MS/MS Fragmentation of **YSGSEGSTQTLTKGELK**

Found in **IP100017526**, Tax\_Id=9606 Gene\_Symbol=S100P Protein S100-P

**Experiment:** 58 - PyE-1 **Fraction:** PyE-1

Match to Query 13010: 1784.880048 from(893.447300,2+)

Title: OECHL100310\_35.7293.7293.2.dta

Data file \\BOROMIR\Masse\Data LTQ-Orbitrap\Chrystelle Lacroix\Etude clinique sJPU\OECHL100310\_35.raw

**Monoisotopic mass of neutral peptide Mr(calc):** 1784.879211 **Fixed modifications:** Carbamidomethyl (C) (apply to specified residues or termini only) **Ions Score:** 66  
**Expect:** 3.9e-005 **Matches :** 26/170 fragment ions using 45 most intense peaks ([help](#))

| #  | b                  | b <sup>++</sup> | b*          | b <sup>***</sup> | b <sup>0</sup>     | b <sup>0++</sup>  | Seq.     | y                  | y <sup>++</sup>   | y*                 | y <sup>***</sup> | y <sup>0</sup>     | y <sup>0++</sup> | #  |
|----|--------------------|-----------------|-------------|------------------|--------------------|-------------------|----------|--------------------|-------------------|--------------------|------------------|--------------------|------------------|----|
| 1  | 164.070605         | 82.538940       |             |                  |                    |                   | <b>Y</b> |                    |                   |                    |                  |                    |                  | 17 |
| 2  | 251.102633         | 126.054954      |             |                  | 233.092068         | 117.049672        | <b>S</b> | 1622.823172        | 811.915224        | 1605.796623        | 803.401950       | 1604.812607        | 802.909941       | 16 |
| 3  | 308.124097         | 154.565687      |             |                  | 290.113532         | 145.560404        | <b>G</b> | 1535.791144        | <b>768.399210</b> | 1518.764595        | 759.885936       | 1517.780579        | 759.393928       | 15 |
| 4  | 395.156125         | 198.081701      |             |                  | 377.145560         | 189.076418        | <b>S</b> | 1478.769680        | <b>739.888478</b> | 1461.743131        | 731.375204       | 1460.759115        | 730.883195       | 14 |
| 5  | <b>524.198718</b>  | 262.602997      |             |                  | <b>506.188153</b>  | 253.597715        | <b>E</b> | <b>1391.737652</b> | <b>696.372464</b> | <b>1374.711103</b> | 687.859190       | <b>1373.727087</b> | 687.367182       | 13 |
| 6  | 581.220182         | 291.113729      |             |                  | 563.209617         | 282.108447        | <b>G</b> | <b>1262.695059</b> | <b>631.851167</b> | 1245.668510        | 623.337893       | 1244.684494        | 622.845885       | 12 |
| 7  | 668.252210         | 334.629743      |             |                  | 650.241645         | <b>325.624461</b> | <b>S</b> | <b>1205.673595</b> | 603.340436        | 1188.647046        | 594.827161       | 1187.663030        | 594.335153       | 11 |
| 8  | 769.299889         | 385.153583      |             |                  | 751.289324         | 376.148300        | <b>T</b> | <b>1118.641567</b> | 559.824421        | 1101.615018        | 551.311147       | 1100.631002        | 550.819139       | 10 |
| 9  | 897.358467         | 449.182872      | 880.331918  | 440.669597       | 879.347902         | 440.177589        | <b>Q</b> | <b>1017.593888</b> | 509.300582        | <b>1000.567339</b> | 500.787307       | 999.583323         | 500.295299       | 9  |
| 10 | 998.406146         | 499.706711      | 981.379597  | 491.193437       | 980.395581         | 490.701429        | <b>T</b> | 889.535310         | 445.271293        | 872.508761         | 436.758018       | 871.524745         | 436.266010       | 8  |
| 11 | 1111.490210        | 556.248743      | 1094.463661 | 547.735469       | <b>1093.479645</b> | 547.243461        | <b>L</b> | <b>788.487631</b>  | 394.747453        | 771.461082         | 386.234179       | 770.477066         | 385.742171       | 7  |
| 12 | 1212.537889        | 606.772583      | 1195.511340 | 598.259308       | <b>1194.527324</b> | 597.767300        | <b>T</b> | <b>675.403567</b>  | 338.205421        | 658.377018         | 329.692147       | 657.393002         | 329.200139       | 6  |
| 13 | <b>1340.632852</b> | 670.820064      | 1323.606303 | 662.306790       | 1322.622287        | 661.814782        | <b>K</b> | <b>574.355888</b>  | 287.681582        | 557.329339         | 279.168307       | 556.345323         | 278.676299       | 5  |
| 14 | 1397.654316        | 699.330796      | 1380.627767 | 690.817522       | 1379.643751        | 690.325514        | <b>G</b> | <b>446.260925</b>  | 223.634100        | 429.234376         | 215.120826       | 428.250360         | 214.628818       | 4  |
| 15 | <b>1526.696909</b> | 763.852093      | 1509.670360 | 755.338818       | 1508.686344        | 754.846810        | <b>E</b> | 389.239461         | 195.123368        | 372.212912         | 186.610094       | <b>371.228896</b>  | 186.118086       | 3  |
| 16 | <b>1639.780973</b> | 820.394124      | 1622.754424 | 811.880850       | 1621.770408        | 811.388842        | <b>L</b> | <b>260.196868</b>  | 130.602072        | 243.170319         | 122.088797       |                    |                  | 2  |
| 17 |                    |                 |             |                  |                    |                   | <b>K</b> | 147.112804         | 74.060040         | 130.086255         | 65.546765        |                    |                  | 1  |

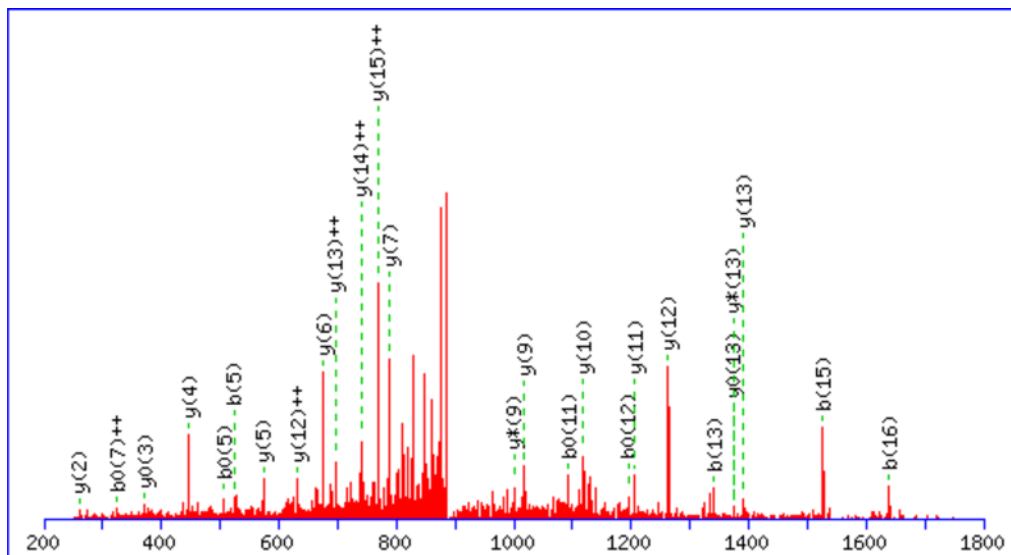

## Peptide View

MS/MS Fragmentation of **ITQDAQLKSSK**

Found in **IP100027482**, Tax\_Id=9606 Gene\_Symbol=SERPINA6 Corticosteroid-binding globulin

**Experiment:** 58 - PyE-1 **Fraction:** PyE-1

Match to Query 6283: 1217.662048 from(609.838300,2+)

Title: OECHL100310\_35.2346.2346.2.dta

Data file \\BOROMIR\Masse\Data LTQ-Orbitrap\Chrystelle Lacroix\Etude clinique sJPU\OECHL100310\_35.raw

**Monoisotopic mass of neutral peptide Mr(calc):** 1217.661545 **Fixed modifications:** Carbamidomethyl (C) (apply to specified residues or termini only) **Ions Score:** 54

**Expect:** 0.00025 **Matches :** 28/112 fragment ions using 54 most intense peaks ([help](#))

| # | b                 | b <sup>++</sup> | b*         | b* <sup>++</sup> | b <sup>0</sup>    | b <sup>0++</sup> | Seq. | y                  | y <sup>++</sup>   | y*                 | y* <sup>++</sup>  | y <sup>0</sup>    | y <sup>0++</sup>  | #  |
|---|-------------------|-----------------|------------|------------------|-------------------|------------------|------|--------------------|-------------------|--------------------|-------------------|-------------------|-------------------|----|
| 1 | 114.091340        | 57.549308       |            |                  |                   |                  | I    |                    |                   |                    |                   |                   |                   | 11 |
| 2 | <b>215.139019</b> | 108.073147      |            |                  | 197.128454        | 99.067865        | T    | <b>1105.584779</b> | <b>553.296028</b> | <b>1088.558230</b> | <b>544.782753</b> | 1087.574214       | <b>544.290745</b> | 10 |
| 3 | 343.197597        | 172.102437      | 326.171048 | 163.589162       | <b>325.187032</b> | 163.097154       | Q    | <b>1004.537100</b> | <b>502.772188</b> | <b>987.510551</b>  | <b>494.258914</b> | <b>986.526535</b> | <b>493.766906</b> | 9  |
| 4 | <b>458.224540</b> | 229.615908      | 441.197991 | 221.102634       | 440.213975        | 220.610626       | D    | <b>876.478522</b>  | 438.742899        | 859.451973         | 430.229625        | 858.467957        | 429.737617        | 8  |
| 5 | 529.261654        | 265.134465      | 512.235105 | 256.621191       | 511.251089        | 256.129183       | A    | <b>761.451579</b>  | 381.229428        | 744.425030         | 372.716153        | 743.441014        | 372.224145        | 7  |
| 6 | 657.320232        | 329.163754      | 640.293683 | 320.650480       | 639.309667        | 320.158472       | Q    | <b>690.414465</b>  | <b>345.710871</b> | 673.387916         | 337.197596        | 672.403900        | 336.705588        | 6  |

|    |                    |                   |             |            |             |            |   |                   |            |            |            |                   |            |   |
|----|--------------------|-------------------|-------------|------------|-------------|------------|---|-------------------|------------|------------|------------|-------------------|------------|---|
| 7  | <b>770.404296</b>  | 385.705786        | 753.377747  | 377.192512 | 752.393731  | 376.700504 | L | <b>562.355887</b> | 281.681582 | 545.329338 | 273.168307 | <b>544.345322</b> | 272.676299 | 5 |
| 8  | <b>898.499259</b>  | <b>449.753268</b> | 881.472710  | 441.239993 | 880.488694  | 440.747985 | K | <b>449.271823</b> | 225.139549 | 432.245274 | 216.626275 | <b>431.261258</b> | 216.134267 | 4 |
| 9  | 985.531287         | 493.269282        | 968.504738  | 484.756007 | 967.520722  | 484.263999 | S | <b>321.176860</b> | 161.092068 | 304.150311 | 152.578793 | 303.166295        | 152.086785 | 3 |
| 10 | <b>1072.563315</b> | 536.785296        | 1055.536766 | 528.272021 | 1054.552750 | 527.780013 | S | <b>234.144832</b> | 117.576054 | 217.118283 | 109.062779 | 216.134267        | 108.570771 | 2 |
| 11 |                    |                   |             |            |             |            | K | 147.112804        | 74.060040  | 130.086255 | 65.546765  |                   |            | 1 |

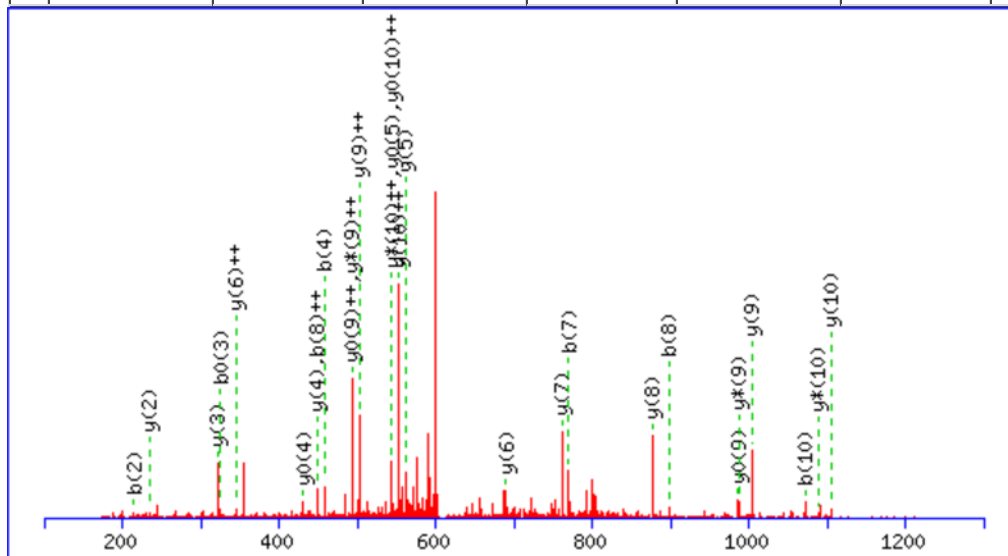

## Peptide View

MS/MS Fragmentation of **GSDPVTIFLR**

Found in **IP100027038**, Tax\_Id=9606 Gene\_Symbol=VSIG4 Isoform 1 of V-set and immunoglobulin domain-containing protein 4

**Experiment:** 58 - PyE-1 **Fraction:** PyE-1

Match to Query 4648: 1103.597248 from(552.805900,2+)

Title: OECHL100310\_35.17678.17678.2.dta

Data file \\BOROMIR\Masse\Data LTQ-Orbitrap\Chrystelle Lacroix\Etude clinique sJPU\OECHL100310\_35.raw

**Monoisotopic mass of neutral peptide Mr(calc):** 1103.597519 **Fixed modifications:** Carbamidomethyl (C) (apply to specified residues or termini only) **Ions Score:** 52

**Expect:** 0.00053 **Matches :** 18/80 fragment ions using 40 most intense peaks ([help](#))

| # | b         | b <sup>++</sup> | b <sup>0</sup> | b <sup>0++</sup> | Seq. | y | y <sup>++</sup> | y <sup>*</sup> | y <sup>*++</sup> | y <sup>0</sup> | y <sup>0++</sup> | #  |
|---|-----------|-----------------|----------------|------------------|------|---|-----------------|----------------|------------------|----------------|------------------|----|
| 1 | 58.028740 | 29.518008       |                |                  | G    |   |                 |                |                  |                |                  | 10 |



|    |            |            |            |            |   |             |            |             |            |             |            |   |
|----|------------|------------|------------|------------|---|-------------|------------|-------------|------------|-------------|------------|---|
| 2  | 145.060768 | 73.034022  | 127.050203 | 64.028740  | S | 1047.583322 | 524.295299 | 1030.556773 | 515.782025 | 1029.572757 | 515.290017 | 9 |
| 3  | 260.087711 | 130.547494 | 242.077146 | 121.542211 | D | 960.551294  | 480.779285 | 943.524745  | 472.266011 | 942.540729  | 471.774003 | 8 |
| 4  | 357.140475 | 179.073875 | 339.129910 | 170.068593 | P | 845.524351  | 423.265814 | 828.497802  | 414.752539 | 827.513786  | 414.260531 | 7 |
| 5  | 456.208889 | 228.608082 | 438.198324 | 219.602800 | V | 748.471587  | 374.739432 | 731.445038  | 366.226157 | 730.461022  | 365.734149 | 6 |
| 6  | 557.256568 | 279.131922 | 539.246003 | 270.126640 | T | 649.403173  | 325.205225 | 632.376624  | 316.691950 | 631.392608  | 316.199942 | 5 |
| 7  | 670.340632 | 335.673954 | 652.330067 | 326.668672 | I | 548.355494  | 274.681385 | 531.328945  | 266.168111 |             |            | 4 |
| 8  | 817.409046 | 409.208161 | 799.398481 | 400.202879 | F | 435.271430  | 218.139353 | 418.244881  | 209.626079 |             |            | 3 |
| 9  | 930.493110 | 465.750193 | 912.482545 | 456.744911 | L | 288.203016  | 144.605146 | 271.176467  | 136.091872 |             |            | 2 |
| 10 |            |            |            |            | R | 175.118952  | 88.063114  | 158.092403  | 79.549840  |             |            | 1 |

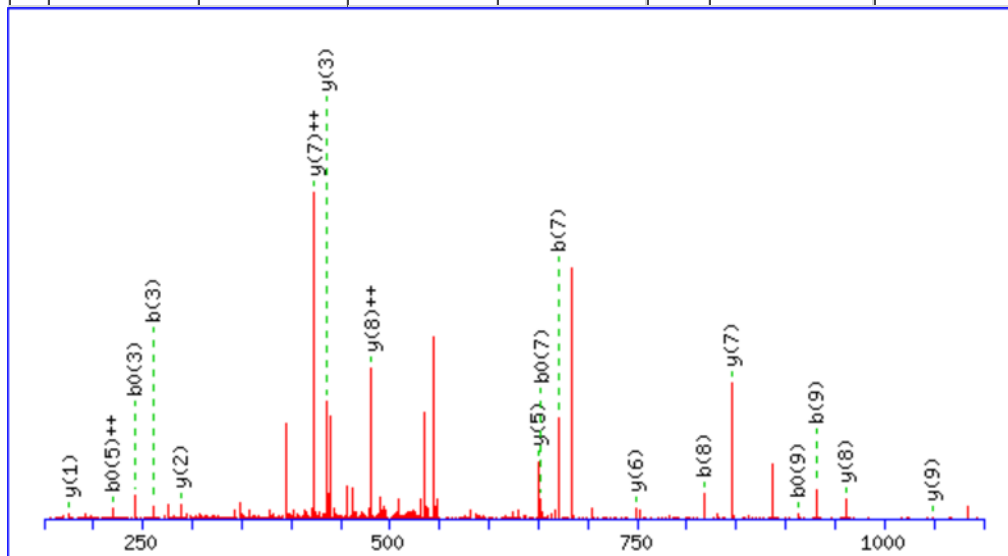

## Peptide View

MS/MS Fragmentation of **QAPGQGLEWMGR**

Found in **IPI00009792**, Tax\_Id=9606 Gene\_Symbol=IGHV1OR15-1 Ig heavy chain V-I region V35

**Experiment:** 58 - PyE-1 **Fraction:** PyE-1

Match to Query 8084: 1328.630248 from(665.322400,2+)

Title: OECHL100310\_35.14338.14338.2.dta

Data file \\BOROMIR\Masse\Data LTQ-Orbitrap\Chrystelle Lacroix\Etude clinique sJPU\OECHL100310\_35.raw

**Monoisotopic mass of neutral peptide Mr(calc):** 1328.629547**Fixed modifications:** Carbamidomethyl (C) (apply to specified residues or termini only)**Ions Score:** 50

**Expect:** 0.00095**Matches :** 26/110 fragment ions using 56 most intense peaks ([help](#))

| #  | b                  | b <sup>++</sup> | b*                 | b <sup>***</sup> | b <sup>0</sup>     | b <sup>0++</sup> | Seq. | y                  | y <sup>++</sup>   | y*          | y <sup>***</sup>  | y <sup>0</sup> | y <sup>0++</sup>  | #  |
|----|--------------------|-----------------|--------------------|------------------|--------------------|------------------|------|--------------------|-------------------|-------------|-------------------|----------------|-------------------|----|
| 1  | 129.065854         | 65.036565       | 112.039305         | 56.523291        |                    |                  | Q    |                    |                   |             |                   |                |                   | 12 |
| 2  | <b>200.102968</b>  | 100.555122      | 183.076419         | 92.041848        |                    |                  | A    | <b>1201.578255</b> | 601.292766        | 1184.551706 | 592.779491        | 1183.567690    | 592.287483        | 11 |
| 3  | 297.155732         | 149.081504      | 280.129183         | 140.568230       |                    |                  | P    | <b>1130.541141</b> | <b>565.774208</b> | 1113.514592 | <b>557.260934</b> | 1112.530576    | <b>556.768926</b> | 10 |
| 4  | <b>354.177196</b>  | 177.592236      | 337.150647         | 169.078961       |                    |                  | G    | <b>1033.488377</b> | 517.247827        | 1016.461828 | 508.734552        | 1015.477812    | 508.242544        | 9  |
| 5  | <b>482.235774</b>  | 241.621525      | <b>465.209225</b>  | 233.108251       |                    |                  | Q    | 976.466913         | <b>488.737095</b> | 959.440364  | 480.223820        | 958.456348     | 479.731812        | 8  |
| 6  | 539.257238         | 270.132257      | 522.230689         | 261.618983       |                    |                  | G    | <b>848.408335</b>  | 424.707806        | 831.381786  | 416.194531        | 830.397770     | 415.702523        | 7  |
| 7  | 652.341302         | 326.674289      | <b>635.314753</b>  | 318.161015       |                    |                  | L    | <b>791.386871</b>  | 396.197074        | 774.360322  | 387.683799        | 773.376306     | 387.191791        | 6  |
| 8  | <b>781.383895</b>  | 391.195586      | <b>764.357346</b>  | 382.682311       | 763.373330         | 382.190303       | E    | <b>678.302807</b>  | 339.655042        | 661.276258  | 331.141767        | 660.292242     | 330.649759        | 5  |
| 9  | <b>967.463208</b>  | 484.235242      | <b>950.436659</b>  | 475.721968       | 949.452643         | 475.229960       | W    | <b>549.260214</b>  | 275.133745        | 532.233665  | 266.620471        |                |                   | 4  |
| 10 | <b>1098.503693</b> | 549.755485      | <b>1081.477144</b> | 541.242210       | <b>1080.493128</b> | 540.750202       | M    | <b>363.180901</b>  | 182.094088        | 346.154352  | 173.580814        |                |                   | 3  |
| 11 | 1155.525157        | 578.266217      | <b>1138.498608</b> | 569.752942       | 1137.514592        | 569.260934       | G    | <b>232.140416</b>  | 116.573846        | 215.113867  | 108.060571        |                |                   | 2  |
| 12 |                    |                 |                    |                  |                    |                  | R    | 175.118952         | 88.063114         | 158.092403  | 79.549839         |                |                   | 1  |

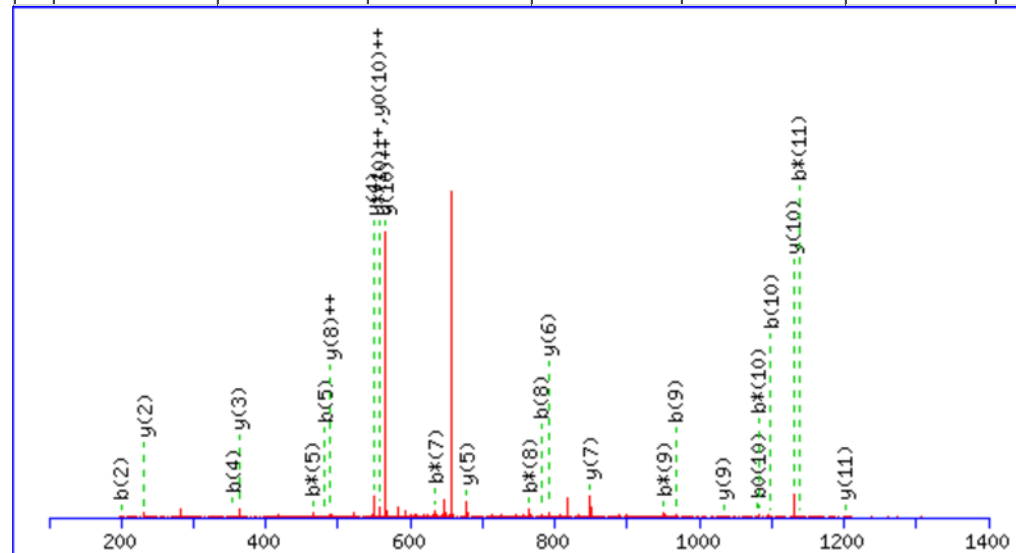

## Peptide View

MS/MS Fragmentation of **SFCDLTDEWR**

Found in **IP100010193**, Tax\_Id=9606 Gene\_Symbol=IFNAR2 Isoform 1 of Interferon-alpha/beta receptor beta chain

**Experiment:** 29 - NOPE2 **Fraction:** NOPE2

Match to Query 8055: 1327.552848 from(664.783700,2+)

Title: OECHL100312\_44.17113.17113.2.dta

Data file \\Boromir\masse\Data LTQ-Orbitrap\Chrystelle Lacroix\Etude clinique sJPU\OECHL100312\_44.raw

**Monoisotopic mass of neutral peptide Mr(calc):** 1327.550308**Fixed modifications:** Carbamidomethyl (C) (apply to specified residues or termini only)**Ions Score:** 59

**Expect:** 3e-005**Matches :** 12/86 fragment ions using 12 most intense peaks ([help](#))

| #         | b           | b <sup>++</sup> | b <sup>0</sup> | b <sup>0++</sup> | Seq.     | y           | y <sup>++</sup> | y*          | y <sup>*++</sup> | y <sup>0</sup> | y <sup>0++</sup> | #         |
|-----------|-------------|-----------------|----------------|------------------|----------|-------------|-----------------|-------------|------------------|----------------|------------------|-----------|
| <b>1</b>  | 88.039304   | 44.523290       | 70.028739      | 35.518008        | <b>S</b> |             |                 |             |                  |                |                  | <b>10</b> |
| <b>2</b>  | 235.107718  | 118.057497      | 217.097153     | 109.052214       | <b>F</b> | 1241.525550 | 621.266413      | 1224.499001 | 612.753138       | 1223.514985    | 612.261130       | <b>9</b>  |
| <b>3</b>  | 395.138367  | 198.072821      | 377.127802     | 189.067539       | <b>C</b> | 1094.457136 | 547.732206      | 1077.430587 | 539.218932       | 1076.446571    | 538.726924       | <b>8</b>  |
| <b>4</b>  | 510.165310  | 255.586293      | 492.154745     | 246.581010       | <b>D</b> | 934.426487  | 467.716882      | 917.399938  | 459.203607       | 916.415922     | 458.711599       | <b>7</b>  |
| <b>5</b>  | 623.249374  | 312.128325      | 605.238809     | 303.123043       | <b>L</b> | 819.399544  | 410.203410      | 802.372995  | 401.690135       | 801.388979     | 401.198127       | <b>6</b>  |
| <b>6</b>  | 724.297053  | 362.652165      | 706.286488     | 353.646882       | <b>T</b> | 706.315480  | 353.661378      | 689.288931  | 345.148103       | 688.304915     | 344.656095       | <b>5</b>  |
| <b>7</b>  | 839.323996  | 420.165636      | 821.313431     | 411.160353       | <b>D</b> | 605.267801  | 303.137539      | 588.241252  | 294.624264       | 587.257236     | 294.132256       | <b>4</b>  |
| <b>8</b>  | 968.366589  | 484.686933      | 950.356024     | 475.681650       | <b>E</b> | 490.240858  | 245.624067      | 473.214309  | 237.110792       | 472.230293     | 236.618784       | <b>3</b>  |
| <b>9</b>  | 1154.445902 | 577.726589      | 1136.435337    | 568.721306       | <b>W</b> | 361.198265  | 181.102770      | 344.171716  | 172.589496       |                |                  | <b>2</b>  |
| <b>10</b> |             |                 |                |                  | <b>R</b> | 175.118952  | 88.063114       | 158.092403  | 79.549839        |                |                  | <b>1</b>  |

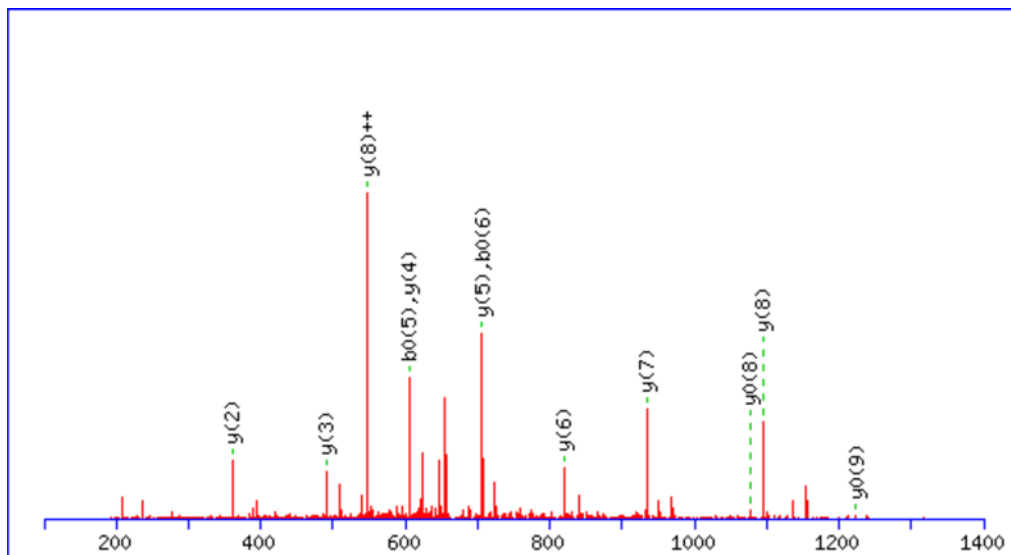

## Peptide View

MS/MS Fragmentation of **HSFKGEECPAGSHR**

Found in **IPI00021970**, Tax\_Id=9606 Gene\_Symbol=MGC31957;TNFRSF10C TNFRSF10C protein

**Experiment:** 29 - NOPE2 **Fraction:** NOPE2

Match to Query 10725: 1597.706648 from(799.860600,2+)

Title: OECHL100312\_44.2337.2337.2.dta

Data file \\Boromir\masse\Data LTQ-Orbitrap\Chrystelle Lacroix\Etude clinique sJPU\OECHL100312\_44.raw

**Monoisotopic mass of neutral peptide Mr(calc):** 1597.705566 **Fixed modifications:** Carbamidomethyl (C) (apply to specified residues or termini only) **Ions Score:** 73

**Expect:** 2.8e-006 **Matches :** 36/144 fragment ions using 68 most intense peaks ([help](#))

| # | b                 | b <sup>++</sup> | b <sup>*</sup> | b <sup>*++</sup> | b <sup>0</sup>    | b <sup>0++</sup> | Seq.     | y                  | y <sup>++</sup>   | y <sup>*</sup>     | y <sup>*++</sup>  | y <sup>0</sup> | y <sup>0++</sup>  | #         |
|---|-------------------|-----------------|----------------|------------------|-------------------|------------------|----------|--------------------|-------------------|--------------------|-------------------|----------------|-------------------|-----------|
| 1 | 138.066188        | 69.536732       |                |                  |                   |                  | <b>H</b> |                    |                   |                    |                   |                |                   | <b>14</b> |
| 2 | <b>225.098216</b> | 113.052746      |                |                  | 207.087651        | 104.047463       | <b>S</b> | <b>1461.653938</b> | <b>731.330607</b> | 1444.627389        | 722.817333        | 1443.643373    | <b>722.325325</b> | <b>13</b> |
| 3 | <b>372.166630</b> | 186.586953      |                |                  | <b>354.156065</b> | 177.581671       | <b>F</b> | <b>1374.621910</b> | <b>687.814593</b> | 1357.595361        | 679.301319        | 1356.611345    | 678.809311        | <b>12</b> |
| 4 | <b>500.261593</b> | 250.634435      | 483.235044     | 242.121160       | <b>482.251028</b> | 241.629152       | <b>K</b> | <b>1227.553496</b> | <b>614.280386</b> | <b>1210.526947</b> | <b>605.767112</b> | 1209.542931    | <b>605.275104</b> | <b>11</b> |
| 5 | 557.283057        | 279.145167      | 540.256508     | 270.631892       | 539.272492        | 270.139884       | <b>G</b> | <b>1099.458533</b> | 550.232905        | 1082.431984        | 541.719630        | 1081.447968    | 541.227622        | <b>10</b> |
| 6 | <b>686.325650</b> | 343.666463      | 669.299101     | 335.153189       | 668.315085        | 334.661181       | <b>E</b> | <b>1042.437069</b> | 521.722173        | 1025.410520        | 513.208898        | 1024.426504    | 512.716890        | <b>9</b>  |

|    |             |            |             |            |             |            |   |            |            |            |            |            |            |   |
|----|-------------|------------|-------------|------------|-------------|------------|---|------------|------------|------------|------------|------------|------------|---|
| 7  | 815.368243  | 408.187760 | 798.341694  | 399.674485 | 797.357678  | 399.182477 | E | 913.394476 | 457.200876 | 896.367927 | 448.687602 | 895.383911 | 448.195594 | 8 |
| 8  | 975.398892  | 488.203084 | 958.372343  | 479.689810 | 957.388327  | 479.197802 | C | 784.351883 | 392.679580 | 767.325334 | 384.166305 | 766.341318 | 383.674297 | 7 |
| 9  | 1072.451656 | 536.729466 | 1055.425107 | 528.216192 | 1054.441091 | 527.724184 | P | 624.321234 | 312.664255 | 607.294685 | 304.150981 | 606.310669 | 303.658973 | 6 |
| 10 | 1143.488770 | 572.248023 | 1126.462221 | 563.734749 | 1125.478205 | 563.242741 | A | 527.268470 | 264.137873 | 510.241921 | 255.624598 | 509.257905 | 255.132590 | 5 |
| 11 | 1200.510234 | 600.758755 | 1183.483685 | 592.245481 | 1182.499669 | 591.753473 | G | 456.231356 | 228.619316 | 439.204807 | 220.106041 | 438.220791 | 219.614033 | 4 |
| 12 | 1287.542262 | 644.274769 | 1270.515713 | 635.761495 | 1269.531697 | 635.269487 | S | 399.209892 | 200.108584 | 382.183343 | 191.595309 | 381.199327 | 191.103301 | 3 |
| 13 | 1424.601174 | 712.804225 | 1407.574625 | 704.290951 | 1406.590609 | 703.798943 | H | 312.177864 | 156.592570 | 295.151315 | 148.079295 |            |            | 2 |
| 14 |             |            |             |            |             |            | R | 175.118952 | 88.063114  | 158.092403 | 79.549839  |            |            | 1 |

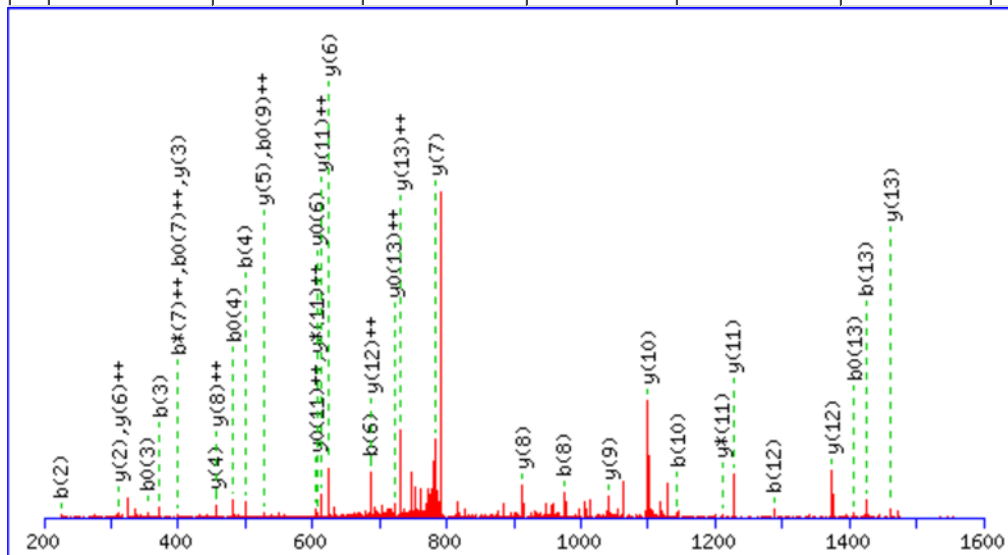

## Peptide View

MS/MS Fragmentation of **VDCGYPHVTPK**

Found in **IP100018909**, Tax\_Id=9606 Gene\_Symbol=TFF3 trefoil factor 3 precursor

**Experiment:** 29 - NOPE2 **Fraction:** NOPE2

Match to Query 7411: 1271.598048 from(636.806300,2+)

Title: OECHL100312\_44.5703.5703.2.dta

Data file \\Boromir\masse\Data LTQ-Orbitrap\Chrystelle Lacroix\Etude clinique sJPU\OECHL100312\_44.raw

**Monoisotopic mass of neutral peptide Mr(calc):** 1271.596878 **Fixed modifications:** Carbamidomethyl (C) (apply to specified residues or termini only) **Ions Score:** 53

**Expect:** 0.00044**Matches :** 20/94 fragment ions using 42 most intense peaks ([help](#))

| #  | b                  | b <sup>++</sup> | b <sup>0</sup> | b <sup>0++</sup> | Seq. | y                  | y <sup>++</sup>   | y <sup>*</sup> | y <sup>*++</sup>  | y <sup>0</sup>    | y <sup>0++</sup>  | #  |
|----|--------------------|-----------------|----------------|------------------|------|--------------------|-------------------|----------------|-------------------|-------------------|-------------------|----|
| 1  | 100.075690         | 50.541483       |                |                  | V    |                    |                   |                |                   |                   |                   | 11 |
| 2  | <b>215.102633</b>  | 108.054954      | 197.092068     | 99.049672        | D    | 1173.535722        | 587.271499        | 1156.509173    | 578.758224        | 1155.525157       | 578.266216        | 10 |
| 3  | <b>375.133282</b>  | 188.070279      | 357.122717     | 179.064997       | C    | <b>1058.508779</b> | <b>529.758028</b> | 1041.482230    | <b>521.244753</b> | 1040.498214       | <b>520.752745</b> | 9  |
| 4  | <b>432.154746</b>  | 216.581011      | 414.144181     | 207.575729       | G    | <b>898.478130</b>  | 449.742703        | 881.451581     | 441.229428        | 880.467565        | 440.737420        | 8  |
| 5  | <b>595.218075</b>  | 298.112676      | 577.207510     | 289.107393       | Y    | <b>841.456666</b>  | 421.231971        | 824.430117     | 412.718696        | 823.446101        | 412.226688        | 7  |
| 6  | <b>692.270839</b>  | 346.639058      | 674.260274     | 337.633775       | P    | <b>678.393337</b>  | 339.700307        | 661.366788     | 331.187032        | 660.382772        | 330.695024        | 6  |
| 7  | <b>829.329751</b>  | 415.168514      | 811.319186     | 406.163231       | H    | 581.340573         | 291.173925        | 564.314024     | 282.660650        | 563.330008        | 282.168642        | 5  |
| 8  | <b>928.398165</b>  | 464.702721      | 910.387600     | 455.697438       | V    | <b>444.281661</b>  | 222.644468        | 427.255112     | 214.131194        | <b>426.271096</b> | 213.639186        | 4  |
| 9  | <b>1029.445844</b> | 515.226560      | 1011.435279    | 506.221277       | T    | <b>345.213247</b>  | 173.110261        | 328.186698     | 164.596987        | 327.202682        | 164.104979        | 3  |
| 10 | <b>1126.498608</b> | 563.752942      | 1108.488043    | 554.747659       | P    | <b>244.165568</b>  | 122.586422        | 227.139019     | 114.073148        |                   |                   | 2  |
| 11 |                    |                 |                |                  | K    | 147.112804         | 74.060040         | 130.086255     | 65.546765         |                   |                   | 1  |

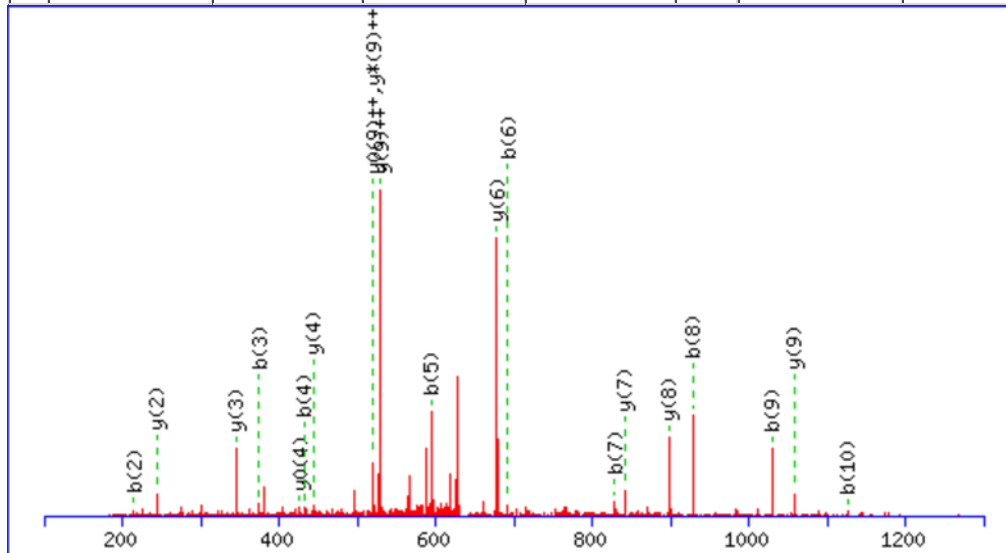

## Peptide View

MS/MS Fragmentation of **ATLLEEQLPLGK**

Found in **IPI00414542**, Tax\_Id=9606 Gene\_Symbol=PDCD1LG2 Isoform 1 of Programmed cell death 1 ligand 2

**Experiment:** 29 - NOPE2 **Fraction:** NOPE2

Match to Query 7889: 1310.746848 from(656.380700,2+)

Title: OECHL100312\_44.17062.17062.2.dta

Data file \\Boromir\masse\Data LTQ-Orbitrap\Chrystelle Lacroix\Etude clinique sJPU\OECHL100312\_44.raw

**Monoisotopic mass of neutral peptide Mr(calc):** 1310.744537 **Fixed modifications:** Carbamidomethyl (C) (apply to specified residues or termini only) **Ions Score:** 49

**Expect:** 0.00055 **Matches :** 15/106 fragment ions using 24 most intense peaks ([help](#))

| #  | b                  | b <sup>++</sup> | b <sup>*</sup> | b <sup>*++</sup> | b <sup>0</sup>    | b <sup>0++</sup> | Seq. | y                  | y <sup>++</sup>   | y <sup>*</sup>    | y <sup>*++</sup> | y <sup>0</sup> | y <sup>0++</sup> | #  |
|----|--------------------|-----------------|----------------|------------------|-------------------|------------------|------|--------------------|-------------------|-------------------|------------------|----------------|------------------|----|
| 1  | 72.044390          | 36.525833       |                |                  |                   |                  | A    |                    |                   |                   |                  |                |                  | 12 |
| 2  | 173.092069         | 87.049672       |                |                  | 155.081504        | 78.044390        | T    | <b>1240.714731</b> | 620.861004        | 1223.688182       | 612.347729       | 1222.704166    | 611.855721       | 11 |
| 3  | <b>286.176133</b>  | 143.591704      |                |                  | <b>268.165568</b> | 134.586422       | L    | 1139.667052        | <b>570.337164</b> | 1122.640503       | 561.823890       | 1121.656487    | 561.331882       | 10 |
| 4  | 399.260197         | 200.133737      |                |                  | 381.249632        | 191.128454       | L    | <b>1026.582988</b> | 513.795132        | 1009.556439       | 505.281858       | 1008.572423    | 504.789850       | 9  |
| 5  | 528.302790         | 264.655033      |                |                  | 510.292225        | 255.649751       | E    | <b>913.498924</b>  | 457.253100        | 896.472375        | 448.739825       | 895.488359     | 448.247818       | 8  |
| 6  | 657.345383         | 329.176330      |                |                  | 639.334818        | 320.171047       | E    | <b>784.456331</b>  | 392.731804        | 767.429782        | 384.218529       | 766.445766     | 383.726521       | 7  |
| 7  | <b>785.403961</b>  | 393.205619      | 768.377412     | 384.692344       | 767.393396        | 384.200336       | Q    | 655.413738         | 328.210507        | <b>638.387189</b> | 319.697232       |                |                  | 6  |
| 8  | <b>898.488025</b>  | 449.747651      | 881.461476     | 441.234376       | <b>880.477460</b> | 440.742368       | L    | <b>527.355160</b>  | 264.181218        | 510.328611        | 255.667943       |                |                  | 5  |
| 9  | 995.540789         | 498.274033      | 978.514240     | 489.760758       | 977.530224        | 489.268750       | P    | <b>414.271096</b>  | 207.639186        | 397.244547        | 199.125911       |                |                  | 4  |
| 10 | <b>1108.624853</b> | 554.816065      | 1091.598304    | 546.302790       | 1090.614288       | 545.810782       | L    | 317.218332         | 159.112804        | 300.191783        | 150.599529       |                |                  | 3  |
| 11 | 1165.646317        | 583.326797      | 1148.619768    | 574.813522       | 1147.635752       | 574.321514       | G    | <b>204.134268</b>  | 102.570772        | 187.107719        | 94.057497        |                |                  | 2  |
| 12 |                    |                 |                |                  |                   |                  | K    | 147.112804         | 74.060040         | 130.086255        | 65.546765        |                |                  | 1  |

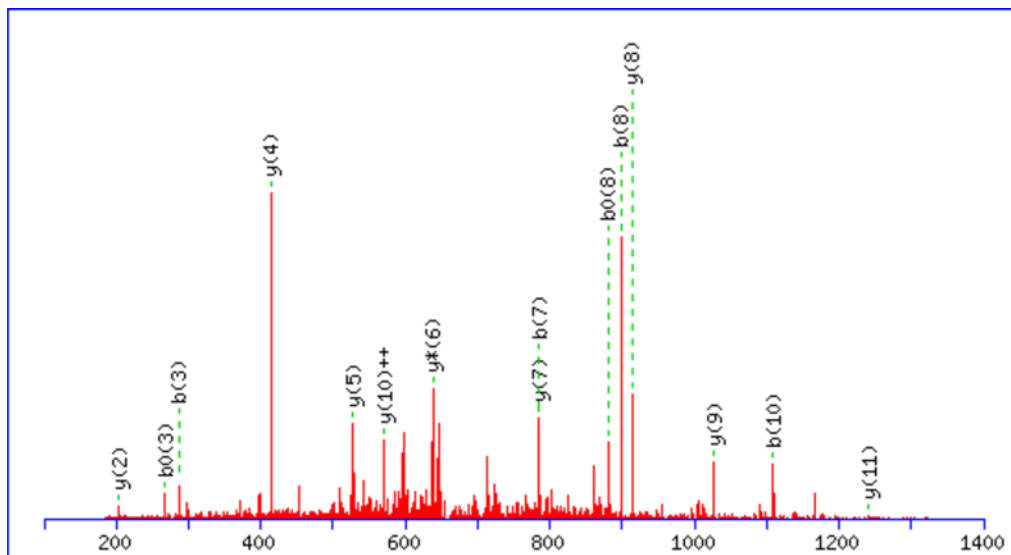

## Peptide View

MS/MS Fragmentation of **EVQLVESGGGLVQPGGSLR**

Found in **IPI00382494**, Tax\_Id=9606 Gene\_Symbol=- Ig heavy chain V-III region TEI

**Experiment:** 29 - NOPE2 **Fraction:** NOPE2

Match to Query 13578: 1880.999448 from(941.507000,2+)

Title: OECHL100312\_44.15571.15571.2.dta

Data file \\Boromir\masse\Data LTQ-Orbitrap\Chrystelle Lacroix\Etude clinique sJPU\OECHL100312\_44.raw

**Monoisotopic mass of neutral peptide Mr(calc):** 1880.995605 **Fixed modifications:** Carbamidomethyl (C) (apply to specified residues or termini only) **Ions Score:** 91

**Expect:** 6.6e-008 **Matches :** 50/208 fragment ions using 72 most intense peaks ([help](#))

| # | b                 | b <sup>++</sup> | b*                | b* <sup>++</sup> | b <sup>0</sup>    | b <sup>0++</sup> | Seq.     | y                  | y <sup>++</sup> | y*                 | y* <sup>++</sup>  | y <sup>0</sup>     | y <sup>0++</sup>  | #         |
|---|-------------------|-----------------|-------------------|------------------|-------------------|------------------|----------|--------------------|-----------------|--------------------|-------------------|--------------------|-------------------|-----------|
| 1 | 130.049869        | 65.528572       |                   |                  | 112.039304        | 56.523290        | <b>E</b> |                    |                 |                    |                   |                    |                   | <b>19</b> |
| 2 | 229.118283        | 115.062780      |                   |                  | 211.107718        | 106.057497       | <b>V</b> | 1752.960275        | 876.983776      | 1735.933726        | 868.470501        | 1734.949710        | 867.978493        | <b>18</b> |
| 3 | <b>357.176861</b> | 179.092069      | 340.150312        | 170.578794       | <b>339.166296</b> | 170.086786       | <b>Q</b> | <b>1653.891861</b> | 827.449569      | 1636.865312        | 818.936294        | 1635.881296        | 818.444286        | <b>17</b> |
| 4 | <b>470.260925</b> | 235.634101      | 453.234376        | 227.120826       | <b>452.250360</b> | 226.628818       | <b>L</b> | <b>1525.833283</b> | 763.420279      | 1508.806734        | 754.907005        | <b>1507.822718</b> | 754.414997        | <b>16</b> |
| 5 | <b>569.329339</b> | 285.168308      | <b>552.302790</b> | 276.655033       | <b>551.318774</b> | 276.163025       | <b>V</b> | <b>1412.749219</b> | 706.878248      | 1395.722670        | <b>698.364973</b> | <b>1394.738654</b> | <b>697.872965</b> | <b>15</b> |
| 6 | <b>698.371932</b> | 349.689604      | 681.345383        | 341.176330       | 680.361367        | 340.684322       | <b>E</b> | <b>1313.680805</b> | 657.344041      | <b>1296.654256</b> | 648.830766        | 1295.670240        | 648.338758        | <b>14</b> |



|    |             |            |             |            |             |            |   |             |            |             |            |             |            |    |
|----|-------------|------------|-------------|------------|-------------|------------|---|-------------|------------|-------------|------------|-------------|------------|----|
| 7  | 785.403960  | 393.205618 | 768.377411  | 384.692344 | 767.393395  | 384.200336 | S | 1184.638212 | 592.822744 | 1167.611663 | 584.309470 | 1166.627647 | 583.817462 | 13 |
| 8  | 842.425424  | 421.716350 | 825.398875  | 413.203076 | 824.414859  | 412.711068 | G | 1097.606184 | 549.306730 | 1080.579635 | 540.793456 | 1079.595619 | 540.301447 | 12 |
| 9  | 899.446888  | 450.227082 | 882.420339  | 441.713808 | 881.436323  | 441.221800 | G | 1040.584720 | 520.795998 | 1023.558171 | 512.282723 | 1022.574155 | 511.790716 | 11 |
| 10 | 956.468352  | 478.737814 | 939.441803  | 470.224540 | 938.457787  | 469.732532 | G | 983.563256  | 492.285266 | 966.536707  | 483.771991 | 965.552691  | 483.279983 | 10 |
| 11 | 1069.552416 | 535.279846 | 1052.525867 | 526.766572 | 1051.541851 | 526.274564 | L | 926.541792  | 463.774534 | 909.515243  | 455.261259 | 908.531227  | 454.769251 | 9  |
| 12 | 1168.620830 | 584.814053 | 1151.594281 | 576.300779 | 1150.610265 | 575.808771 | V | 813.457728  | 407.232502 | 796.431179  | 398.719227 | 795.447163  | 398.227219 | 8  |
| 13 | 1296.679408 | 648.843342 | 1279.652859 | 640.330068 | 1278.668843 | 639.838060 | Q | 714.389314  | 357.698295 | 697.362765  | 349.185020 | 696.378749  | 348.693012 | 7  |
| 14 | 1393.732172 | 697.369724 | 1376.705623 | 688.856450 | 1375.721607 | 688.364442 | P | 586.330736  | 293.669006 | 569.304187  | 285.155731 | 568.320171  | 284.663723 | 6  |
| 15 | 1450.753636 | 725.880456 | 1433.727087 | 717.367182 | 1432.743071 | 716.875174 | G | 489.277972  | 245.142624 | 472.251423  | 236.629349 | 471.267407  | 236.137341 | 5  |
| 16 | 1507.775100 | 754.391188 | 1490.748551 | 745.877914 | 1489.764535 | 745.385906 | G | 432.256508  | 216.631892 | 415.229959  | 208.118617 | 414.245943  | 207.626609 | 4  |
| 17 | 1594.807128 | 797.907202 | 1577.780579 | 789.393928 | 1576.796563 | 788.901920 | S | 375.235044  | 188.121160 | 358.208495  | 179.607885 | 357.224479  | 179.115877 | 3  |
| 18 | 1707.891192 | 854.449234 | 1690.864643 | 845.935960 | 1689.880627 | 845.443952 | L | 288.203016  | 144.605146 | 271.176467  | 136.091871 |             |            | 2  |
| 19 |             |            |             |            |             |            | R | 175.118952  | 88.063114  | 158.092403  | 79.549839  |             |            | 1  |

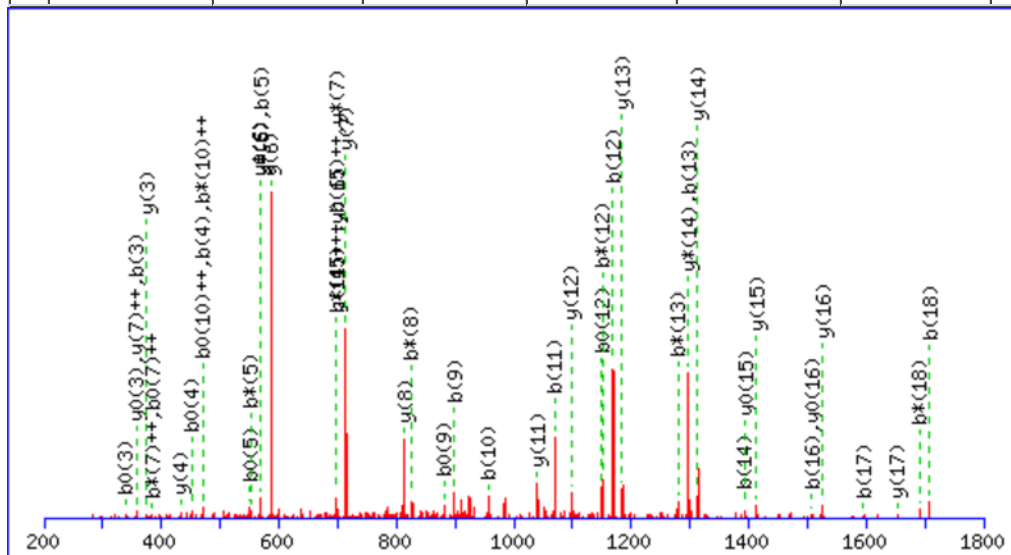

## Peptide View

MS/MS Fragmentation of **LLIYDASNLETGVPSR**

Found in **IPI00003111**, Tax\_Id=9606 Gene\_Symbol=LOC652694 Ig kappa chain V-I region AU

**Experiment:** 29 - NOPE2 **Fraction:** NOPE2

Match to Query 12397: 1746.919448 from(874.467000,2+)

Title: OECHL100312\_44.17248.17248.2.dta

Data file \\Boromir\masse\Data LTQ-Orbitrap\Chrystelle Lacroix\Etude clinique sJPU\OECHL100312\_44.raw

**Monoisotopic mass of neutral peptide Mr(calc):** 1746.915192**Fixed modifications:** Carbamidomethyl (C) (apply to specified residues or termini only)**Ions Score:** 78

**Expect:** 1.8e-006**Matches :** 25/156 fragment ions using 43 most intense peaks ([help](#))

| #  | b                  | b <sup>++</sup> | b*                 | b <sup>*++</sup> | b <sup>0</sup> | b <sup>0++</sup> | Seq. | y                  | y <sup>++</sup>   | y*          | y <sup>*++</sup> | y <sup>0</sup>     | y <sup>0++</sup> | #  |
|----|--------------------|-----------------|--------------------|------------------|----------------|------------------|------|--------------------|-------------------|-------------|------------------|--------------------|------------------|----|
| 1  | 114.091340         | 57.549308       |                    |                  |                |                  | L    |                    |                   |             |                  |                    |                  | 16 |
| 2  | 227.175404         | 114.091340      |                    |                  |                |                  | L    | 1634.838427        | 817.922852        | 1617.811878 | 809.409577       | 1616.827862        | 808.917569       | 15 |
| 3  | 340.259468         | 170.633372      |                    |                  |                |                  | I    | <b>1521.754363</b> | 761.380820        | 1504.727814 | 752.867545       | 1503.743798        | 752.375537       | 14 |
| 4  | 503.322797         | 252.165036      |                    |                  |                |                  | Y    | 1408.670299        | <b>704.838788</b> | 1391.643750 | 696.325513       | <b>1390.659734</b> | 695.833505       | 13 |
| 5  | <b>618.349740</b>  | 309.678508      |                    |                  | 600.339175     | 300.673226       | D    | <b>1245.606970</b> | 623.307123        | 1228.580421 | 614.793849       | 1227.596405        | 614.301841       | 12 |
| 6  | <b>689.386854</b>  | 345.197065      |                    |                  | 671.376289     | 336.191782       | A    | <b>1130.580027</b> | 565.793652        | 1113.553478 | 557.280377       | 1112.569462        | 556.788369       | 11 |
| 7  | 776.418882         | 388.713079      |                    |                  | 758.408317     | 379.707796       | S    | <b>1059.542913</b> | 530.275095        | 1042.516364 | 521.761820       | 1041.532348        | 521.269812       | 10 |
| 8  | 890.461809         | 445.734542      | <b>873.435260</b>  | 437.221268       | 872.451244     | 436.729260       | N    | <b>972.510885</b>  | 486.759081        | 955.484336  | 478.245806       | 954.500320         | 477.753798       | 9  |
| 9  | <b>1003.545873</b> | 502.276574      | 986.519324         | 493.763300       | 985.535308     | 493.271292       | L    | <b>858.467958</b>  | 429.737617        | 841.441409  | 421.224343       | 840.457393         | 420.732335       | 8  |
| 10 | <b>1132.588466</b> | 566.797871      | 1115.561917        | 558.284597       | 1114.577901    | 557.792588       | E    | <b>745.383894</b>  | 373.195585        | 728.357345  | 364.682311       | 727.373329         | 364.190303       | 7  |
| 11 | <b>1233.636145</b> | 617.321710      | 1216.609596        | 608.808436       | 1215.625580    | 608.316428       | T    | <b>616.341301</b>  | 308.674289        | 599.314752  | 300.161014       | 598.330736         | 299.669006       | 6  |
| 12 | <b>1290.657609</b> | 645.832442      | 1273.631060        | 637.319168       | 1272.647044    | 636.827160       | G    | <b>515.293622</b>  | 258.150449        | 498.267073  | 249.637175       | 497.283057         | 249.145167       | 5  |
| 13 | <b>1389.726023</b> | 695.366649      | <b>1372.699474</b> | 686.853375       | 1371.715458    | 686.361367       | V    | <b>458.272158</b>  | 229.639717        | 441.245609  | 221.126443       | 440.261593         | 220.634435       | 4  |
| 14 | 1486.778787        | 743.893032      | 1469.752238        | 735.379757       | 1468.768222    | 734.887749       | P    | <b>359.203744</b>  | 180.105510        | 342.177195  | 171.592236       | <b>341.193179</b>  | 171.100228       | 3  |
| 15 | <b>1573.810815</b> | 787.409046      | <b>1556.784266</b> | 778.895771       | 1555.800250    | 778.403763       | S    | 262.150980         | 131.579128        | 245.124431  | 123.065854       | 244.140415         | 122.573846       | 2  |
| 16 |                    |                 |                    |                  |                |                  | R    | 175.118952         | 88.063114         | 158.092403  | 79.549839        |                    |                  | 1  |

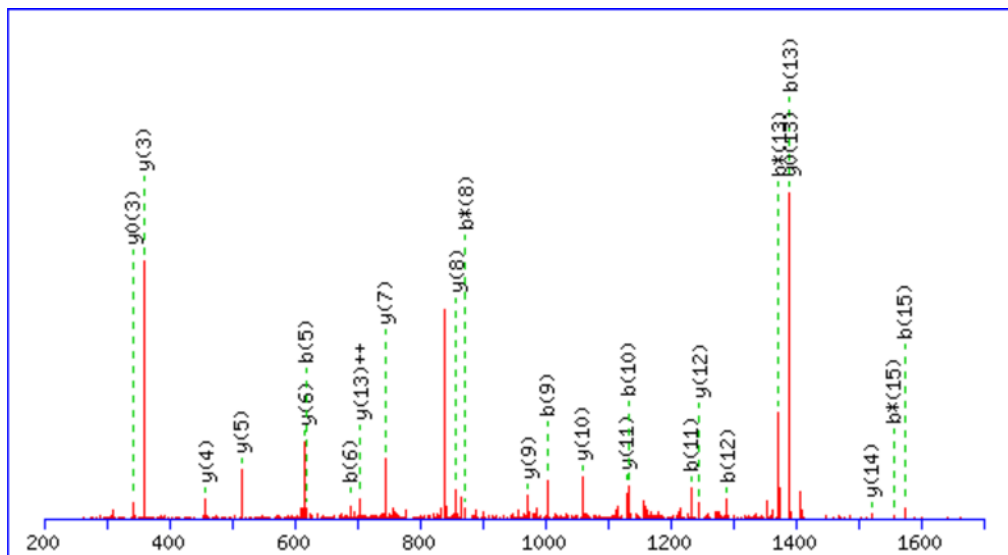

## Peptide View

MS/MS Fragmentation of **AFSMDEHNAALR**

Found in **IPI00008239**, Tax\_Id=9606 Gene\_Symbol=GPRC5B cDNA FLJ55176, highly similar to G-protein coupled receptor family C group 5 member B

**Experiment:** 29 - NOPE2 **Fraction:** NOPE2

Match to Query 8361: 1360.618448 from(681.316500,2+)

Title: OECHL100312\_44.9703.9703.2.dta

Data file \\Boromir\masse\Data LTQ-Orbitrap\Chrystelle Lacroix\Etude clinique sJPU\OECHL100312\_44.raw

**Monoisotopic mass of neutral peptide Mr(calc):** 1360.619354 **Fixed modifications:** Carbamidomethyl (C) (apply to specified residues or termini only) **Ions Score:** 56

**Expect:** 0.00014 **Matches :** 17/102 fragment ions using 24 most intense peaks ([help](#))

| # | b                 | b <sup>++</sup>   | b* | b <sup>*++</sup> | b <sup>0</sup>    | b <sup>0++</sup> | Seq. | y                  | y <sup>++</sup>   | y*          | y <sup>*++</sup> | y <sup>0</sup> | y <sup>0++</sup> | #  |
|---|-------------------|-------------------|----|------------------|-------------------|------------------|------|--------------------|-------------------|-------------|------------------|----------------|------------------|----|
| 1 | 72.044390         | 36.525833         |    |                  |                   |                  | A    |                    |                   |             |                  |                |                  | 12 |
| 2 | <b>219.112804</b> | 110.060040        |    |                  |                   |                  | F    | 1290.589546        | 645.798411        | 1273.562997 | 637.285137       | 1272.578981    | 636.793128       | 11 |
| 3 | <b>306.144832</b> | 153.576054        |    |                  | <b>288.134267</b> | 144.570772       | S    | <b>1143.521132</b> | <b>572.264204</b> | 1126.494583 | 563.750929       | 1125.510567    | 563.258921       | 10 |
| 4 | 437.185317        | <b>219.096296</b> |    |                  | 419.174752        | 210.091014       | M    | <b>1056.489104</b> | 528.748190        | 1039.462555 | 520.234916       | 1038.478539    | 519.742908       | 9  |
| 5 | 552.212260        | 276.609768        |    |                  | 534.201695        | 267.604486       | D    | <b>925.448619</b>  | <b>463.227947</b> | 908.422070  | 454.714673       | 907.438054     | 454.222665       | 8  |
| 6 | 681.254853        | 341.131065        |    |                  | <b>663.244288</b> | 332.125782       | E    | <b>810.421676</b>  | 405.714476        | 793.395127  | 397.201201       | 792.411111     | 396.709193       | 7  |

|    |             |            |             |            |             |            |   |            |            |            |            |  |  |   |
|----|-------------|------------|-------------|------------|-------------|------------|---|------------|------------|------------|------------|--|--|---|
| 7  | 818.313765  | 409.660521 |             |            | 800.303200  | 400.655238 | H | 681.379083 | 341.193179 | 664.352534 | 332.679905 |  |  | 6 |
| 8  | 932.356692  | 466.681984 | 915.330143  | 458.168709 | 914.346127  | 457.676701 | N | 544.320171 | 272.663724 | 527.293622 | 264.150449 |  |  | 5 |
| 9  | 1003.393806 | 502.200541 | 986.367257  | 493.687266 | 985.383241  | 493.195258 | A | 430.277244 | 215.642260 | 413.250695 | 207.128985 |  |  | 4 |
| 10 | 1074.430920 | 537.719098 | 1057.404371 | 529.205824 | 1056.420355 | 528.713816 | A | 359.240130 | 180.123703 | 342.213581 | 171.610428 |  |  | 3 |
| 11 | 1187.514984 | 594.261130 | 1170.488435 | 585.747856 | 1169.504419 | 585.255847 | L | 288.203016 | 144.605146 | 271.176467 | 136.091871 |  |  | 2 |
| 12 |             |            |             |            |             |            | R | 175.118952 | 88.063114  | 158.092403 | 79.549839  |  |  | 1 |

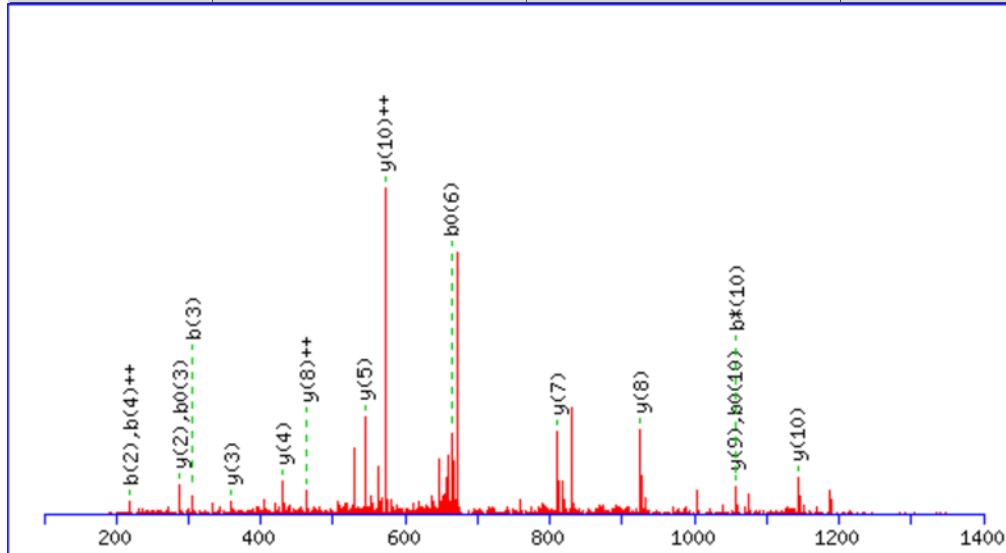

## Peptide View

MS/MS Fragmentation of **GLDTSLGAVQSDTGR**

Found in **IPI00289931**, Tax\_Id=9606 Gene\_Symbol=MADCAM1 MADCAM1 protein

Experiment: 29 - NOPE2 Fraction: NOPE2

Match to Query 9512: 1475.721448 from(738.868000,2+)

Title: OECHL100312\_44.11494.11494.2.dta

Data file \\Boromir\masse\Data LTQ-Orbitrap\Chrystelle Lacroix\Etude clinique sJPU\OECHL100312\_44.raw

**Monoisotopic mass of neutral peptide Mr(calc):** 1475.721619 **Fixed modifications:** Carbamidomethyl (C) (apply to specified residues or termini only) **Ions Score:** 78

**Expect:** 2.2e-006 **Matches :** 20/142 fragment ions using 25 most intense peaks ([help](#))

| # | b | b <sup>++</sup> | b <sup>*</sup> | b <sup>*++</sup> | b <sup>0</sup> | b <sup>0++</sup> | Seq. | y | y <sup>++</sup> | y <sup>*</sup> | y <sup>*++</sup> | y <sup>0</sup> | y <sup>0++</sup> | # |
|---|---|-----------------|----------------|------------------|----------------|------------------|------|---|-----------------|----------------|------------------|----------------|------------------|---|
|---|---|-----------------|----------------|------------------|----------------|------------------|------|---|-----------------|----------------|------------------|----------------|------------------|---|

|    |                    |            |             |            |             |            |            |          |                    |            |             |                   |             |                   |  |  |  |  |           |
|----|--------------------|------------|-------------|------------|-------------|------------|------------|----------|--------------------|------------|-------------|-------------------|-------------|-------------------|--|--|--|--|-----------|
| 1  | 58.028740          | 29.518008  |             |            |             |            |            | <b>G</b> |                    |            |             |                   |             |                   |  |  |  |  | <b>15</b> |
| 2  | 171.112804         | 86.060040  |             |            |             |            |            | <b>L</b> | 1419.707414        | 710.357345 | 1402.680865 | 701.844071        | 1401.696849 | 701.352063        |  |  |  |  | <b>14</b> |
| 3  | <b>286.139747</b>  | 143.573512 |             |            |             | 268.129182 | 134.568229 | <b>D</b> | 1306.623350        | 653.815313 | 1289.596801 | 645.302039        | 1288.612785 | 644.810031        |  |  |  |  | <b>13</b> |
| 4  | 387.187426         | 194.097351 |             |            |             | 369.176861 | 185.092069 | <b>T</b> | <b>1191.596407</b> | 596.301842 | 1174.569858 | <b>587.788567</b> | 1173.585842 | <b>587.296559</b> |  |  |  |  | <b>12</b> |
| 5  | <b>474.219454</b>  | 237.613365 |             |            |             | 456.208889 | 228.608082 | <b>S</b> | <b>1090.548728</b> | 545.778002 | 1073.522179 | 537.264728        | 1072.538163 | 536.772719        |  |  |  |  | <b>11</b> |
| 6  | <b>587.303518</b>  | 294.155397 |             |            |             | 569.292953 | 285.150115 | <b>L</b> | <b>1003.516700</b> | 502.261988 | 986.490151  | 493.748714        | 985.506135  | 493.256706        |  |  |  |  | <b>10</b> |
| 7  | 644.324982         | 322.666129 |             |            |             | 626.314417 | 313.660847 | <b>G</b> | <b>890.432636</b>  | 445.719956 | 873.406087  | 437.206682        | 872.422071  | 436.714674        |  |  |  |  | <b>9</b>  |
| 8  | 715.362096         | 358.184686 |             |            |             | 697.351531 | 349.179404 | <b>A</b> | 833.411172         | 417.209224 | 816.384623  | 408.695950        | 815.400607  | 408.203942        |  |  |  |  | <b>8</b>  |
| 9  | <b>814.430510</b>  | 407.718893 |             |            |             | 796.419945 | 398.713611 | <b>V</b> | 762.374058         | 381.690667 | 745.347509  | 373.177393        | 744.363493  | 372.685385        |  |  |  |  | <b>7</b>  |
| 10 | <b>942.489088</b>  | 471.748182 | 925.462539  | 463.234908 | 924.478523  | 462.742900 |            | <b>Q</b> | <b>663.305644</b>  | 332.156460 | 646.279095  | 323.643186        | 645.295079  | 323.151178        |  |  |  |  | <b>6</b>  |
| 11 | <b>1029.521116</b> | 515.264196 | 1012.494567 | 506.750922 | 1011.510551 | 506.258914 |            | <b>S</b> | <b>535.247066</b>  | 268.127171 | 518.220517  | 259.613897        | 517.236501  | 259.121889        |  |  |  |  | <b>5</b>  |
| 12 | <b>1144.548059</b> | 572.777668 | 1127.521510 | 564.264393 | 1126.537494 | 563.772385 |            | <b>D</b> | <b>448.215038</b>  | 224.611157 | 431.188489  | 216.097882        | 430.204473  | 215.605874        |  |  |  |  | <b>4</b>  |
| 13 | <b>1245.595738</b> | 623.301507 | 1228.569189 | 614.788233 | 1227.585173 | 614.296225 |            | <b>T</b> | <b>333.188095</b>  | 167.097685 | 316.161546  | 158.584411        | 315.177530  | 158.092403        |  |  |  |  | <b>3</b>  |
| 14 | <b>1302.617202</b> | 651.812239 | 1285.590653 | 643.298965 | 1284.606637 | 642.806957 |            | <b>G</b> | <b>232.140416</b>  | 116.573846 | 215.113867  | 108.060571        |             |                   |  |  |  |  | <b>2</b>  |
| 15 |                    |            |             |            |             |            |            | <b>R</b> | 175.118952         | 88.063114  | 158.092403  | 79.549839         |             |                   |  |  |  |  | <b>1</b>  |

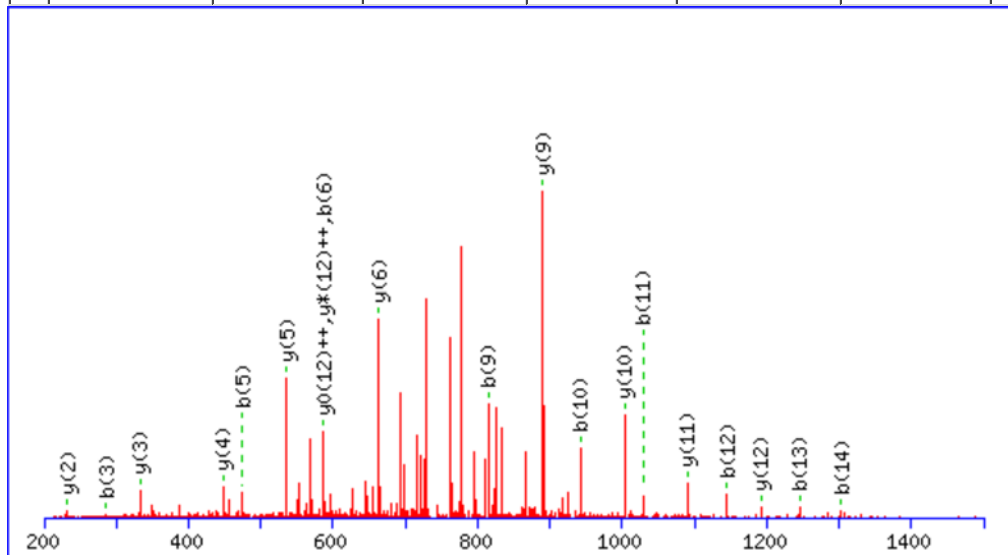

## Peptide View

MS/MS Fragmentation of **ILLDPGALPALQNPPIR**Found in **IPI00304865**, Tax\_Id=9606 Gene\_Symbol=TGFBR3 transforming growth factor, beta receptor III**Experiment:** 29 - NOPE2 **Fraction:** NOPE2

Match to Query 12900: 1797.053448 from(899.534000,2+)

Title: OECHL100312\_44.20189.20189.2.dta

Data file \\Boromir\masse\Data LTQ-Orbitrap\Chrystelle Lacroix\Etude clinique sJPU\OECHL100312\_44.raw

**Monoisotopic mass of neutral peptide Mr(calc):** 1797.051224**Fixed modifications:** Carbamidomethyl (C) (apply to specified residues or termini only)**Ions Score:** 65**Expect:** 3.1e-006**Matches :** 31/138 fragment ions using 77 most intense peaks ([help](#))

| #  | b                  | b <sup>++</sup>   | b*                 | b <sup>*++</sup> | b <sup>0</sup> | b <sup>0++</sup> | Seq. | y                  | y <sup>++</sup>   | y*          | y <sup>*++</sup> | y <sup>0</sup> | y <sup>0++</sup> | #  |
|----|--------------------|-------------------|--------------------|------------------|----------------|------------------|------|--------------------|-------------------|-------------|------------------|----------------|------------------|----|
| 1  | 114.091340         | 57.549308         |                    |                  |                |                  | I    |                    |                   |             |                  |                |                  | 17 |
| 2  | 227.175404         | 114.091340        |                    |                  |                |                  | L    | <b>1684.974468</b> | 842.990872        | 1667.947919 | 834.477598       | 1666.963903    | 833.985590       | 16 |
| 3  | <b>340.259468</b>  | 170.633372        |                    |                  |                |                  | L    | <b>1571.890404</b> | <b>786.448840</b> | 1554.863855 | 777.935566       | 1553.879839    | 777.443558       | 15 |
| 4  | <b>455.286411</b>  | 228.146843        |                    |                  | 437.275846     | 219.141561       | D    | <b>1458.806340</b> | <b>729.906808</b> | 1441.779791 | 721.393534       | 1440.795775    | 720.901526       | 14 |
| 5  | 552.339175         | 276.673226        |                    |                  | 534.328610     | 267.667943       | P    | <b>1343.779397</b> | <b>672.393337</b> | 1326.752848 | 663.880062       |                |                  | 13 |
| 6  | 609.360639         | 305.183958        |                    |                  | 591.350074     | 296.178675       | G    | <b>1246.726633</b> | 623.866955        | 1229.700084 | 615.353680       |                |                  | 12 |
| 7  | <b>680.397753</b>  | <b>340.702515</b> |                    |                  | 662.387188     | 331.697232       | A    | <b>1189.705169</b> | 595.356223        | 1172.678620 | 586.842948       |                |                  | 11 |
| 8  | <b>793.481817</b>  | 397.244547        |                    |                  | 775.471252     | 388.239264       | L    | <b>1118.668055</b> | 559.837665        | 1101.641506 | 551.324391       |                |                  | 10 |
| 9  | <b>890.534581</b>  | 445.770929        |                    |                  | 872.524016     | 436.765646       | P    | <b>1005.583991</b> | <b>503.295634</b> | 988.557442  | 494.782359       |                |                  | 9  |
| 10 | <b>961.571695</b>  | 481.289486        |                    |                  | 943.561130     | 472.284203       | A    | 908.531227         | <b>454.769252</b> | 891.504678  | 446.255977       |                |                  | 8  |
| 11 | <b>1074.655759</b> | 537.831518        |                    |                  | 1056.645194    | 528.826235       | L    | <b>837.494113</b>  | 419.250695        | 820.467564  | 410.737420       |                |                  | 7  |
| 12 | <b>1202.714337</b> | 601.860807        | 1185.687788        | 593.347532       | 1184.703772    | 592.855524       | Q    | <b>724.410049</b>  | 362.708663        | 707.383500  | 354.195388       |                |                  | 6  |
| 13 | <b>1316.757264</b> | 658.882270        | 1299.730715        | 650.368996       | 1298.746699    | 649.876988       | N    | <b>596.351471</b>  | 298.679374        | 579.324922  | 290.166099       |                |                  | 5  |
| 14 | 1413.810028        | 707.408652        | <b>1396.783479</b> | 698.895378       | 1395.799463    | 698.403370       | P    | <b>482.308544</b>  | 241.657910        | 465.281995  | 233.144635       |                |                  | 4  |
| 15 | 1510.862792        | 755.935034        | 1493.836243        | 747.421760       | 1492.852227    | 746.929752       | P    | <b>385.255780</b>  | 193.131528        | 368.229231  | 184.618253       |                |                  | 3  |
| 16 | <b>1623.946856</b> | 812.477066        | <b>1606.920307</b> | 803.963792       | 1605.936291    | 803.471784       | I    | 288.203016         | 144.605146        | 271.176467  | 136.091871       |                |                  | 2  |
| 17 |                    |                   |                    |                  |                |                  | R    | 175.118952         | 88.063114         | 158.092403  | 79.549839        |                |                  | 1  |

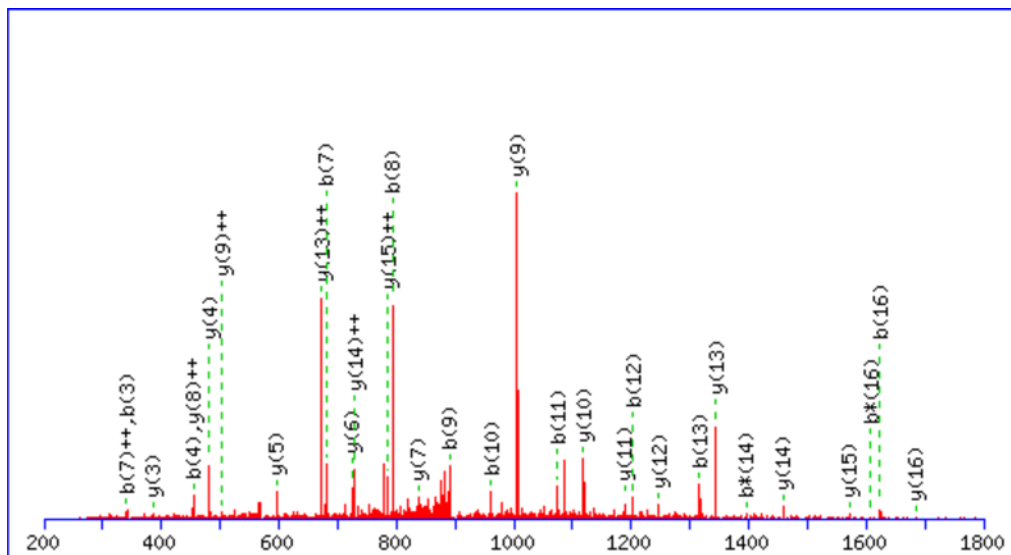

## Peptide View

MS/MS Fragmentation of **LWCATTSNFDSDKK**

Found in **IPI00027509**, Tax\_Id=9606 Gene\_Symbol=MMP9 Matrix metalloproteinase-9

**Experiment:** 29 - NOPE2 **Fraction:** NOPE2

Match to Query 11610: 1671.759648 from(836.887100,2+)

Title: OECHL100312\_44.10883.10883.2.dta

Data file \\Boromir\masse\Data LTQ-Orbitrap\Chrystelle Lacroix\Etude clinique sJPU\OECHL100312\_44.raw

**Monoisotopic mass of neutral peptide Mr(calc):** 1671.756271 **Fixed modifications:** Carbamidomethyl (C) (apply to specified residues or termini only) **Ions Score:** 61

**Expect:** 7e-005 **Matches :** 27/130 fragment ions using 56 most intense peaks ([help](#))

| # | b                 | b <sup>++</sup> | b* | b <sup>*++</sup> | b <sup>0</sup>    | b <sup>0++</sup> | Seq.     | y                  | y <sup>++</sup>   | y*                 | y <sup>*++</sup>  | y <sup>0</sup> | y <sup>0++</sup>  | #         |
|---|-------------------|-----------------|----|------------------|-------------------|------------------|----------|--------------------|-------------------|--------------------|-------------------|----------------|-------------------|-----------|
| 1 | 114.091340        | 57.549308       |    |                  |                   |                  | <b>L</b> |                    |                   |                    |                   |                |                   | <b>14</b> |
| 2 | <b>300.170653</b> | 150.588965      |    |                  |                   |                  | <b>W</b> | 1559.679484        | <b>780.343380</b> | <b>1542.652935</b> | 771.830106        | 1541.668919    | 771.338098        | <b>13</b> |
| 3 | <b>460.201302</b> | 230.604289      |    |                  |                   |                  | <b>C</b> | <b>1373.600171</b> | <b>687.303724</b> | 1356.573622        | <b>678.790449</b> | 1355.589606    | <b>678.298441</b> | <b>12</b> |
| 4 | <b>531.238416</b> | 266.122846      |    |                  |                   |                  | <b>A</b> | <b>1213.569522</b> | 607.288399        | 1196.542973        | 598.775125        | 1195.558957    | 598.283117        | <b>11</b> |
| 5 | 632.286095        | 316.646686      |    |                  | <b>614.275530</b> | 307.641403       | <b>T</b> | <b>1142.532408</b> | 571.769842        | 1125.505859        | 563.256568        | 1124.521843    | 562.764560        | <b>10</b> |
| 6 | 733.333774        | 367.170525      |    |                  | 715.323209        | 358.165243       | <b>T</b> | <b>1041.484729</b> | <b>521.246003</b> | 1024.458180        | 512.732728        | 1023.474164    | 512.240720        | <b>9</b>  |

|    |             |            |             |            |             |            |   |            |            |            |            |            |            |   |
|----|-------------|------------|-------------|------------|-------------|------------|---|------------|------------|------------|------------|------------|------------|---|
| 7  | 820.365802  | 410.686539 |             |            | 802.355237  | 401.681257 | S | 940.437050 | 470.722163 | 923.410501 | 462.208889 | 922.426485 | 461.716881 | 8 |
| 8  | 934.408729  | 467.708003 | 917.382180  | 459.194728 | 916.398164  | 458.702720 | N | 853.405022 | 427.206149 | 836.378473 | 418.692875 | 835.394457 | 418.200867 | 7 |
| 9  | 1081.477143 | 541.242210 | 1064.450594 | 532.728935 | 1063.466578 | 532.236927 | F | 739.362095 | 370.184686 | 722.335546 | 361.671411 | 721.351530 | 361.179403 | 6 |
| 10 | 1196.504086 | 598.755681 | 1179.477537 | 590.242407 | 1178.493521 | 589.750399 | D | 592.293681 | 296.650479 | 575.267132 | 288.137204 | 574.283116 | 287.645196 | 5 |
| 11 | 1283.536114 | 642.271695 | 1266.509565 | 633.758421 | 1265.525549 | 633.266413 | S | 477.266738 | 239.137007 | 460.240189 | 230.623733 | 459.256173 | 230.131725 | 4 |
| 12 | 1398.563057 | 699.785167 | 1381.536508 | 691.271892 | 1380.552492 | 690.779884 | D | 390.234710 | 195.620993 | 373.208161 | 187.107719 | 372.224145 | 186.615711 | 3 |
| 13 | 1526.658020 | 763.832648 | 1509.631471 | 755.319374 | 1508.647455 | 754.827366 | K | 275.207767 | 138.107521 | 258.181218 | 129.594247 |            |            | 2 |
| 14 |             |            |             |            |             |            | K | 147.112804 | 74.060040  | 130.086255 | 65.546765  |            |            | 1 |

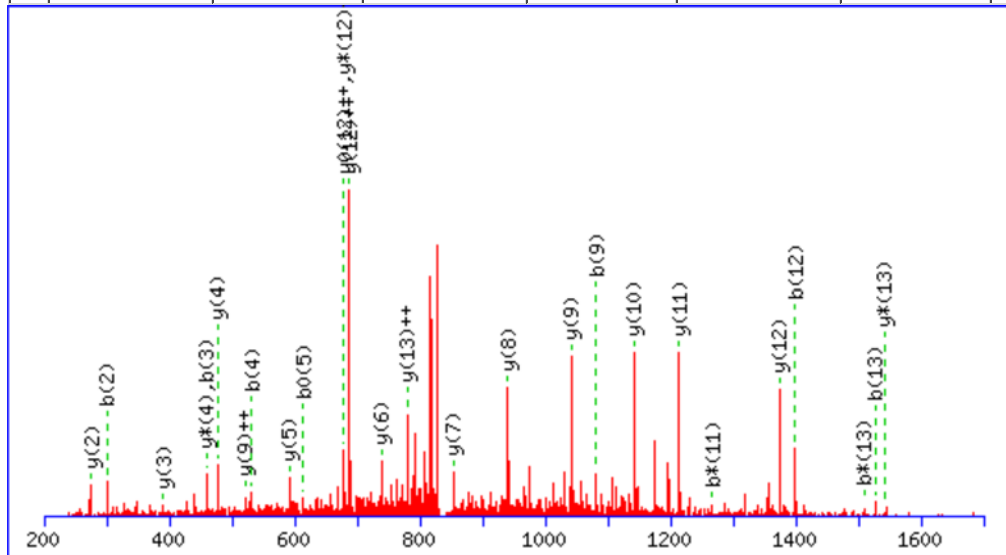

## Peptide View

MS/MS Fragmentation of **VLSNTEDLPLVTK**

Found in **IP100218851**, Tax\_Id=9606 Gene\_Symbol=LYNX1 Ly-6 neurotoxin-like protein 1 isoform a

**Experiment:** 29 - NOPE2 **Fraction:** NOPE2

Match to Query 9022: 1427.786448 from(714.900500,2+)

Title: OECHL100312\_44.14445.14445.2.dta

Data file \\Boromir\masse\Data LTQ-Orbitrap\Chrystelle Lacroix\Etude clinique sJPU\OECHL100312\_44.raw

**Monoisotopic mass of neutral peptide Mr(calc):** 1427.787155 **Fixed modifications:** Carbamidomethyl (C) (apply to specified residues or termini only) **Ions Score:** 61



**Expect:** 6.4e-005**Matches :** 23/132 fragment ions using 48 most intense peaks ([help](#))

| #  | b           | b <sup>++</sup> | b*          | b* <sup>++</sup> | b <sup>0</sup> | b <sup>0++</sup> | Seq. | y           | y <sup>++</sup> | y*          | y* <sup>++</sup> | y <sup>0</sup> | y <sup>0++</sup> | #  |
|----|-------------|-----------------|-------------|------------------|----------------|------------------|------|-------------|-----------------|-------------|------------------|----------------|------------------|----|
| 1  | 100.075690  | 50.541483       |             |                  |                |                  | V    |             |                 |             |                  |                |                  | 13 |
| 2  | 213.159754  | 107.083515      |             |                  |                |                  | L    | 1329.726023 | 665.366650      | 1312.699474 | 656.853375       | 1311.715458    | 656.361367       | 12 |
| 3  | 300.191782  | 150.599529      |             |                  | 282.181217     | 141.594247       | S    | 1216.641959 | 608.824618      | 1199.615410 | 600.311343       | 1198.631394    | 599.819335       | 11 |
| 4  | 414.234709  | 207.620993      | 397.208160  | 199.107718       | 396.224144     | 198.615710       | N    | 1129.609931 | 565.308604      | 1112.583382 | 556.795329       | 1111.599366    | 556.303321       | 10 |
| 5  | 515.282388  | 258.144832      | 498.255839  | 249.631558       | 497.271823     | 249.139550       | T    | 1015.567004 | 508.287140      | 998.540455  | 499.773866       | 997.556439     | 499.281858       | 9  |
| 6  | 644.324981  | 322.666129      | 627.298432  | 314.152854       | 626.314416     | 313.660846       | E    | 914.519325  | 457.763301      | 897.492776  | 449.250026       | 896.508760     | 448.758018       | 8  |
| 7  | 759.351924  | 380.179600      | 742.325375  | 371.666326       | 741.341359     | 371.174318       | D    | 785.476732  | 393.242004      | 768.450183  | 384.728730       | 767.466167     | 384.236722       | 7  |
| 8  | 872.435988  | 436.721632      | 855.409439  | 428.208358       | 854.425423     | 427.716350       | L    | 670.449789  | 335.728533      | 653.423240  | 327.215258       | 652.439224     | 326.723250       | 6  |
| 9  | 969.488752  | 485.248014      | 952.462203  | 476.734740       | 951.478187     | 476.242732       | P    | 557.365725  | 279.186501      | 540.339176  | 270.673226       | 539.355160     | 270.181218       | 5  |
| 10 | 1082.572816 | 541.790046      | 1065.546267 | 533.276772       | 1064.562251    | 532.784764       | L    | 460.312961  | 230.660119      | 443.286412  | 222.146844       | 442.302396     | 221.654836       | 4  |
| 11 | 1181.641230 | 591.324253      | 1164.614681 | 582.810979       | 1163.630665    | 582.318971       | V    | 347.228897  | 174.118087      | 330.202348  | 165.604812       | 329.218332     | 165.112804       | 3  |
| 12 | 1282.688909 | 641.848093      | 1265.662360 | 633.334818       | 1264.678344    | 632.842810       | T    | 248.160483  | 124.583879      | 231.133934  | 116.070605       | 230.149918     | 115.578597       | 2  |
| 13 |             |                 |             |                  |                |                  | K    | 147.112804  | 74.060040       | 130.086255  | 65.546765        |                |                  | 1  |

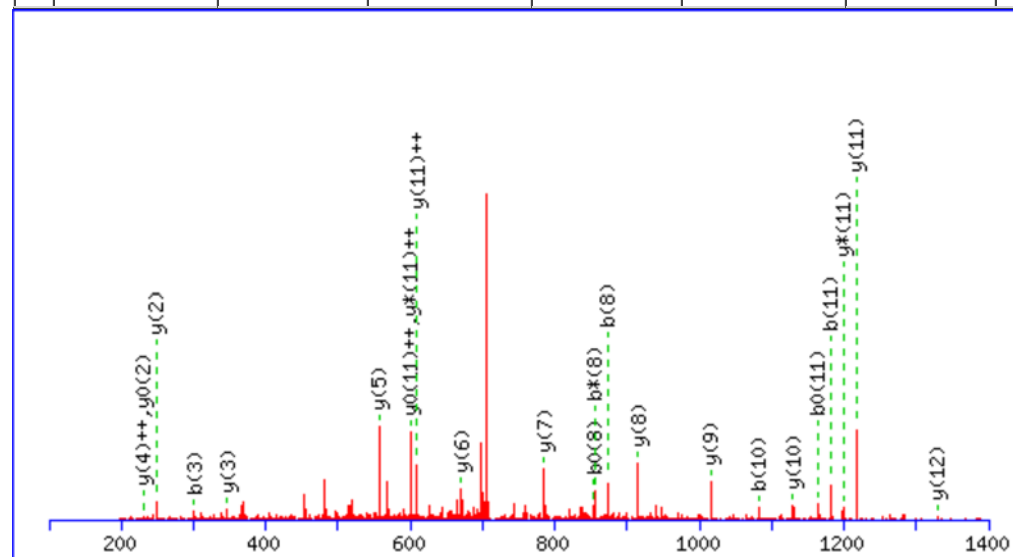

## Peptide View

MS/MS Fragmentation of **TGAVYVAEIGAK**Found in **IPI00552937**, Tax\_Id=9606 Gene\_Symbol=NHLRC3 NHL repeat-containing protein 3**Experiment:** 29 - NOPE2 **Fraction:** NOPE2

Match to Query 5951: 1177.633448 from(589.824000,2+)

Title: OECHL100312\_44.11514.11514.2.dta

Data file \\Boromir\masse\Data LTQ-Orbitrap\Chrystelle Lacroix\Etude clinique sJPU\OECHL100312\_44.raw

**Monoisotopic mass of neutral peptide Mr(calc):** 1177.634277**Fixed modifications:** Carbamidomethyl (C) (apply to specified residues or termini only)**Ions Score:** 59**Expect:** 8.8e-005**Matches :** 9/102 fragment ions using 10 most intense peaks ([help](#))

| #  | b                 | b <sup>++</sup> | b <sup>0</sup> | b <sup>0++</sup> | Seq. | y                  | y <sup>++</sup> | y <sup>*</sup> | y <sup>*++</sup> | y <sup>0</sup> | y <sup>0++</sup> | #  |
|----|-------------------|-----------------|----------------|------------------|------|--------------------|-----------------|----------------|------------------|----------------|------------------|----|
| 1  | 102.054955        | 51.531116       | 84.044390      | 42.525833        | T    |                    |                 |                |                  |                |                  | 12 |
| 2  | 159.076419        | 80.041847       | 141.065854     | 71.036565        | G    | <b>1077.593888</b> | 539.300582      | 1060.567339    | 530.787308       | 1059.583323    | 530.295300       | 11 |
| 3  | <b>230.113533</b> | 115.560404      | 212.102968     | 106.555122       | A    | <b>1020.572424</b> | 510.789850      | 1003.545875    | 502.276576       | 1002.561859    | 501.784568       | 10 |
| 4  | <b>329.181947</b> | 165.094611      | 311.171382     | 156.089329       | V    | <b>949.535310</b>  | 475.271293      | 932.508761     | 466.758019       | 931.524745     | 466.266011       | 9  |
| 5  | <b>492.245276</b> | 246.626276      | 474.234711     | 237.620994       | Y    | <b>850.466896</b>  | 425.737086      | 833.440347     | 417.223812       | 832.456331     | 416.731804       | 8  |
| 6  | 591.313690        | 296.160483      | 573.303125     | 287.155201       | V    | <b>687.403567</b>  | 344.205422      | 670.377018     | 335.692147       | 669.393002     | 335.200139       | 7  |
| 7  | 662.350804        | 331.679040      | 644.340239     | 322.673758       | A    | 588.335153         | 294.671215      | 571.308604     | 286.157940       | 570.324588     | 285.665932       | 6  |
| 8  | 791.393397        | 396.200337      | 773.382832     | 387.195054       | E    | 517.298039         | 259.152658      | 500.271490     | 250.639383       | 499.287474     | 250.147375       | 5  |
| 9  | 904.477461        | 452.742369      | 886.466896     | 443.737086       | I    | <b>388.255446</b>  | 194.631361      | 371.228897     | 186.118087       |                |                  | 4  |
| 10 | 961.498925        | 481.253101      | 943.488360     | 472.247818       | G    | 275.171382         | 138.089329      | 258.144833     | 129.576055       |                |                  | 3  |
| 11 | 1032.536039       | 516.771658      | 1014.525474    | 507.766375       | A    | 218.149918         | 109.578597      | 201.123369     | 101.065322       |                |                  | 2  |
| 12 |                   |                 |                |                  | K    | 147.112804         | 74.060040       | 130.086255     | 65.546765        |                |                  | 1  |

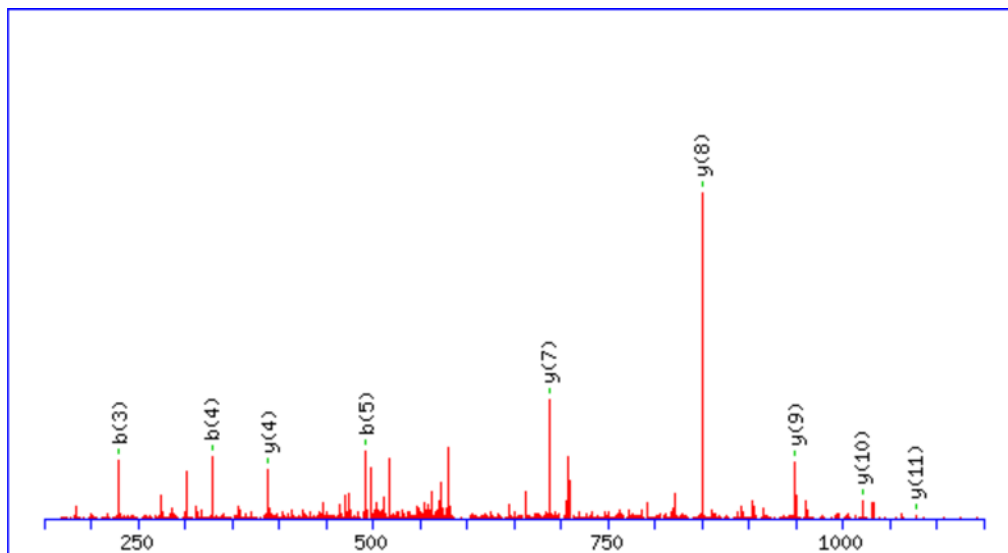

## Peptide View

MS/MS Fragmentation of **EAGSAVEAEELVK**

Found in **IPI00008586**, Tax\_Id=9606 Gene\_Symbol=CSPG5 Isoform 1 of Chondroitin sulfate proteoglycan 5

**Experiment:** 29 - NOPE2 **Fraction:** NOPE2

Match to Query 8069: 1330.661448 from(666.338000,2+)

Title: OECHL100312\_44.11549.11549.2.dta

Data file \\Boromir\masse\Data LTQ-Orbitrap\Chrystelle Lacroix\Etude clinique sJPU\OECHL100312\_44.raw

**Monoisotopic mass of neutral peptide Mr(calc):** 1330.661591 **Fixed modifications:** Carbamidomethyl (C) (apply to specified residues or termini only) **Ions Score:** 59

**Expect:** 0.00017 **Matches :** 39/114 fragment ions using 89 most intense peaks ([help](#))

| # | b                 | b <sup>++</sup>   | b <sup>0</sup>    | b <sup>0++</sup> | Seq.     | y                  | y <sup>++</sup>   | y <sup>*</sup>     | y <sup>*++</sup>  | y <sup>0</sup>     | y <sup>0++</sup>  | #         |
|---|-------------------|-------------------|-------------------|------------------|----------|--------------------|-------------------|--------------------|-------------------|--------------------|-------------------|-----------|
| 1 | 130.049869        | 65.528572         | 112.039304        | 56.523290        | <b>E</b> |                    |                   |                    |                   |                    |                   | <b>13</b> |
| 2 | <b>201.086983</b> | 101.047130        | 183.076418        | 92.041847        | <b>A</b> | <b>1202.626309</b> | 601.816793        | <b>1185.599760</b> | 593.303518        | <b>1184.615744</b> | 592.811510        | <b>12</b> |
| 3 | <b>258.108447</b> | 129.557862        | <b>240.097882</b> | 120.552579       | <b>G</b> | <b>1131.589195</b> | <b>566.298236</b> | 1114.562646        | <b>557.784961</b> | 1113.578630        | <b>557.292953</b> | <b>11</b> |
| 4 | 345.140475        | 173.073875        | <b>327.129910</b> | 164.068593       | <b>S</b> | <b>1074.567731</b> | <b>537.787504</b> | 1057.541182        | 529.274229        | 1056.557166        | 528.782221        | <b>10</b> |
| 5 | <b>416.177589</b> | 208.592432        | <b>398.167024</b> | 199.587150       | <b>A</b> | <b>987.535703</b>  | 494.271490        | 970.509154         | 485.758215        | 969.525138         | 485.266207        | <b>9</b>  |
| 6 | <b>515.246003</b> | <b>258.126640</b> | <b>497.235438</b> | 249.121357       | <b>V</b> | <b>916.498589</b>  | 458.752933        | 899.472040         | 450.239658        | 898.488024         | 449.747650        | <b>8</b>  |

|    |             |            |             |            |   |            |            |            |            |            |            |   |
|----|-------------|------------|-------------|------------|---|------------|------------|------------|------------|------------|------------|---|
| 7  | 644.288596  | 322.647936 | 626.278031  | 313.642653 | E | 817.430175 | 409.218726 | 800.403626 | 400.705451 | 799.419610 | 400.213443 | 7 |
| 8  | 715.325710  | 358.166493 | 697.315145  | 349.161210 | A | 688.387582 | 344.697429 | 671.361033 | 336.184155 | 670.377017 | 335.692147 | 6 |
| 9  | 844.368303  | 422.687790 | 826.357738  | 413.682507 | E | 617.350468 | 309.178872 | 600.323919 | 300.665598 | 599.339903 | 300.173590 | 5 |
| 10 | 973.410896  | 487.209086 | 955.400331  | 478.203803 | E | 488.307875 | 244.657576 | 471.281326 | 236.144301 | 470.297310 | 235.652293 | 4 |
| 11 | 1086.494960 | 543.751118 | 1068.484395 | 534.745836 | L | 359.265282 | 180.136279 | 342.238733 | 171.623005 |            |            | 3 |
| 12 | 1185.563374 | 593.285325 | 1167.552809 | 584.280043 | V | 246.181218 | 123.594247 | 229.154669 | 115.080973 |            |            | 2 |
| 13 |             |            |             |            | K | 147.112804 | 74.060040  | 130.086255 | 65.546765  |            |            | 1 |

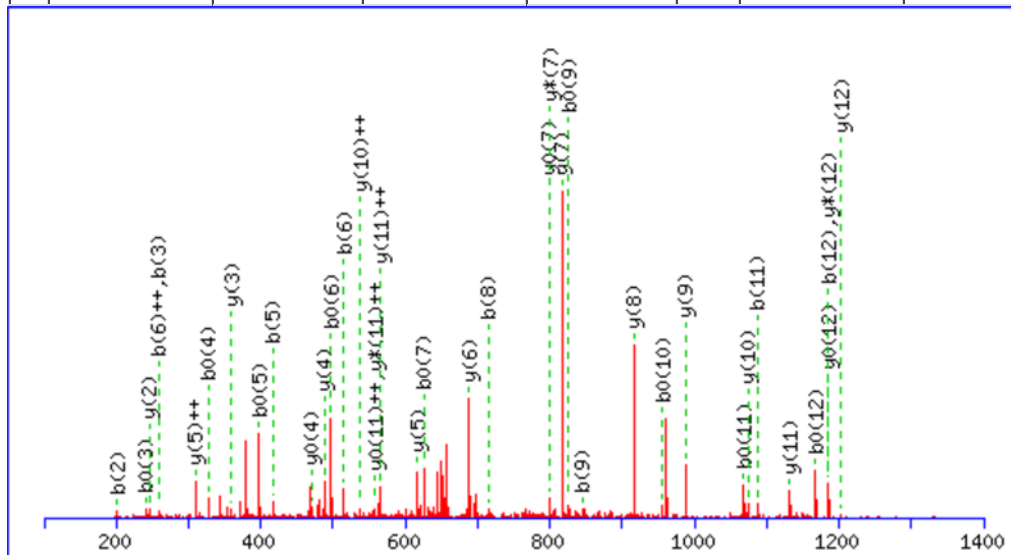

## Peptide View

MS/MS Fragmentation of **VATQEGKEITCR**

Found in **IPI00031564**, Tax\_Id=9606 Gene\_Symbol=GGCT Isoform 1 of Gamma-glutamylcyclotransferase

**Experiment:** 29 - NOPE2 **Fraction:** NOPE2

Match to Query 8636: 1390.688448 from(696.351500,2+)

Title: OECHL100312\_44.3666.3666.2.dta

Data file \\Boromir\masse\Data LTQ-Orbitrap\Chrystelle Lacroix\Etude clinique sJPU\OECHL100312\_44.raw

**Monoisotopic mass of neutral peptide Mr(calc):** 1390.687454 **Fixed modifications:** Carbamidomethyl (C) (apply to specified residues or termini only) **Ions Score:** 54

**Expect:** 0.00059 **Matches :** 19/118 fragment ions using 36 most intense peaks ([help](#))

| #  | b                  | b <sup>++</sup>   | b*                | b <sup>*++</sup> | b <sup>0</sup>    | b <sup>0++</sup> | Seq. | y                  | y <sup>++</sup>   | y*          | y <sup>*++</sup>  | y <sup>0</sup> | y <sup>0++</sup>  | #  |
|----|--------------------|-------------------|-------------------|------------------|-------------------|------------------|------|--------------------|-------------------|-------------|-------------------|----------------|-------------------|----|
| 1  | 100.075690         | 50.541483         |                   |                  |                   |                  | V    |                    |                   |             |                   |                |                   | 12 |
| 2  | 171.112804         | 86.060040         |                   |                  |                   |                  | A    | 1292.626328        | 646.816802        | 1275.599779 | 638.303528        | 1274.615763    | 637.811520        | 11 |
| 3  | 272.160483         | 136.583879        |                   |                  | 254.149918        | 127.578597       | T    | <b>1221.589214</b> | <b>611.298245</b> | 1204.562665 | 602.784971        | 1203.578649    | 602.292963        | 10 |
| 4  | 400.219061         | 200.613169        | <b>383.192512</b> | 192.099894       | <b>382.208496</b> | 191.607886       | Q    | <b>1120.541535</b> | 560.774406        | 1103.514986 | <b>552.261131</b> | 1102.530970    | <b>551.769123</b> | 9  |
| 5  | <b>529.261654</b>  | 265.134465        | 512.235105        | 256.621191       | 511.251089        | 256.129183       | E    | <b>992.482957</b>  | 496.745117        | 975.456408  | 488.231842        | 974.472392     | 487.739834        | 8  |
| 6  | 586.283118         | 293.645197        | 569.256569        | 285.131923       | 568.272553        | 284.639915       | G    | <b>863.440364</b>  | 432.223820        | 846.413815  | 423.710546        | 845.429799     | 423.218538        | 7  |
| 7  | <b>714.378081</b>  | 357.692679        | 697.351532        | 349.179404       | 696.367516        | 348.687396       | K    | <b>806.418900</b>  | 403.713088        | 789.392351  | 395.199814        | 788.408335     | 394.707806        | 6  |
| 8  | 843.420674         | 422.213975        | 826.394125        | 413.700701       | 825.410109        | 413.208693       | E    | <b>678.323937</b>  | 339.665607        | 661.297388  | 331.152332        | 660.313372     | 330.660324        | 5  |
| 9  | 956.504738         | 478.756007        | 939.478189        | 470.242733       | 938.494173        | 469.750725       | I    | <b>549.281344</b>  | 275.144310        | 532.254795  | 266.631036        | 531.270779     | 266.139028        | 4  |
| 10 | <b>1057.552417</b> | <b>529.279847</b> | 1040.525868       | 520.766572       | 1039.541852       | 520.274564       | T    | <b>436.197280</b>  | 218.602278        | 419.170731  | 210.089003        | 418.186715     | 209.596995        | 3  |
| 11 | <b>1217.583066</b> | 609.295171        | 1200.556517       | 600.781897       | 1199.572501       | 600.289889       | C    | <b>335.149601</b>  | 168.078438        | 318.123052  | 159.565164        |                |                   | 2  |
| 12 |                    |                   |                   |                  |                   |                  | R    | 175.118952         | 88.063114         | 158.092403  | 79.549839         |                |                   | 1  |

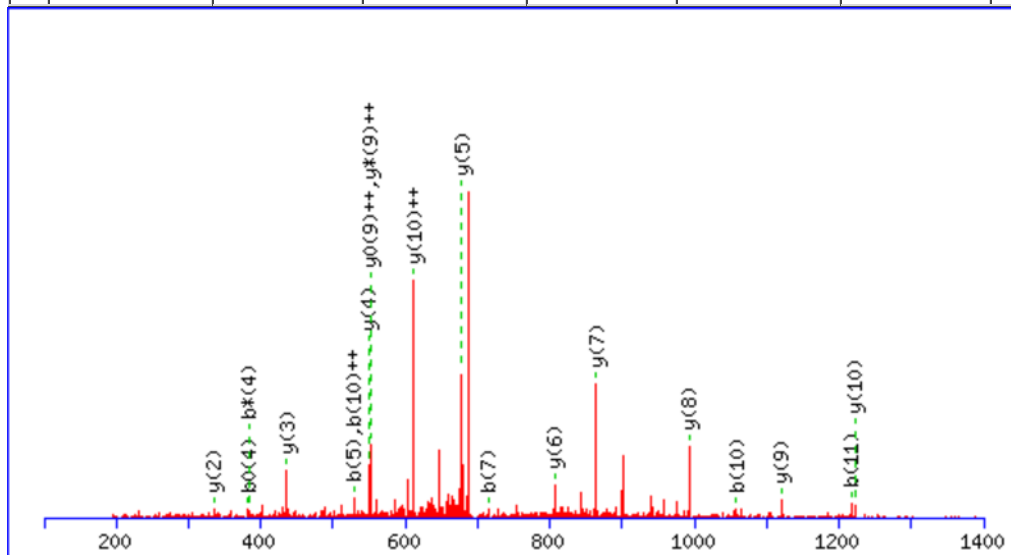

## Peptide View

MS/MS Fragmentation of **AVGLLTVISK**

Found in **IPI00013446**, Tax\_Id=9606 Gene\_Symbol=PSCA Prostate stem cell antigen

**Experiment:** 29 - NOPE2 **Fraction:** NOPE2

Match to Query 3489: 999.633248 from(500.823900,2+)

Title: OECHL100312\_44.17419.17419.2.dta

Data file \\Boromir\masse\Data LTQ-Orbitrap\Chrystelle Lacroix\Etude clinique sJPU\OECHL100312\_44.raw

**Monoisotopic mass of neutral peptide Mr(calc):** 999.632828 **Fixed modifications:** Carbamidomethyl (C) (apply to specified residues or termini only) **Ions Score:** 56

**Expect:** 3.1e-005 **Matches :** 16/78 fragment ions using 35 most intense peaks ([help](#))

| #  | b                 | b <sup>++</sup>   | b <sup>0</sup>    | b <sup>0++</sup> | Seq. | y                 | y <sup>++</sup> | y*         | y <sup>*++</sup> | y <sup>0</sup> | y <sup>0++</sup> | #  |
|----|-------------------|-------------------|-------------------|------------------|------|-------------------|-----------------|------------|------------------|----------------|------------------|----|
| 1  | 72.044390         | 36.525833         |                   |                  | A    |                   |                 |            |                  |                |                  | 10 |
| 2  | <b>171.112804</b> | 86.060040         |                   |                  | V    | 929.602995        | 465.305136      | 912.576446 | 456.791861       | 911.592430     | 456.299853       | 9  |
| 3  | <b>228.134268</b> | 114.570772        |                   |                  | G    | <b>830.534581</b> | 415.770929      | 813.508032 | 407.257654       | 812.524016     | 406.765646       | 8  |
| 4  | <b>341.218332</b> | <b>171.112804</b> |                   |                  | L    | 773.513117        | 387.260197      | 756.486568 | 378.746922       | 755.502552     | 378.254914       | 7  |
| 5  | <b>454.302396</b> | 227.654836        |                   |                  | L    | <b>660.429053</b> | 330.718165      | 643.402504 | 322.204890       | 642.418488     | 321.712882       | 6  |
| 6  | <b>555.350075</b> | <b>278.178676</b> | 537.339510        | 269.173393       | T    | <b>547.344989</b> | 274.176133      | 530.318440 | 265.662858       | 529.334424     | 265.170850       | 5  |
| 7  | <b>654.418489</b> | 327.712883        | 636.407924        | 318.707600       | V    | 446.297310        | 223.652293      | 429.270761 | 215.139018       | 428.286745     | 214.647010       | 4  |
| 8  | <b>767.502553</b> | 384.254915        | <b>749.491988</b> | 375.249632       | I    | <b>347.228896</b> | 174.118086      | 330.202347 | 165.604811       | 329.218331     | 165.112803       | 3  |
| 9  | <b>854.534581</b> | 427.770929        | 836.524016        | 418.765646       | S    | <b>234.144832</b> | 117.576054      | 217.118283 | 109.062779       | 216.134267     | 108.570771       | 2  |
| 10 |                   |                   |                   |                  | K    | 147.112804        | 74.060040       | 130.086255 | 65.546765        |                |                  | 1  |

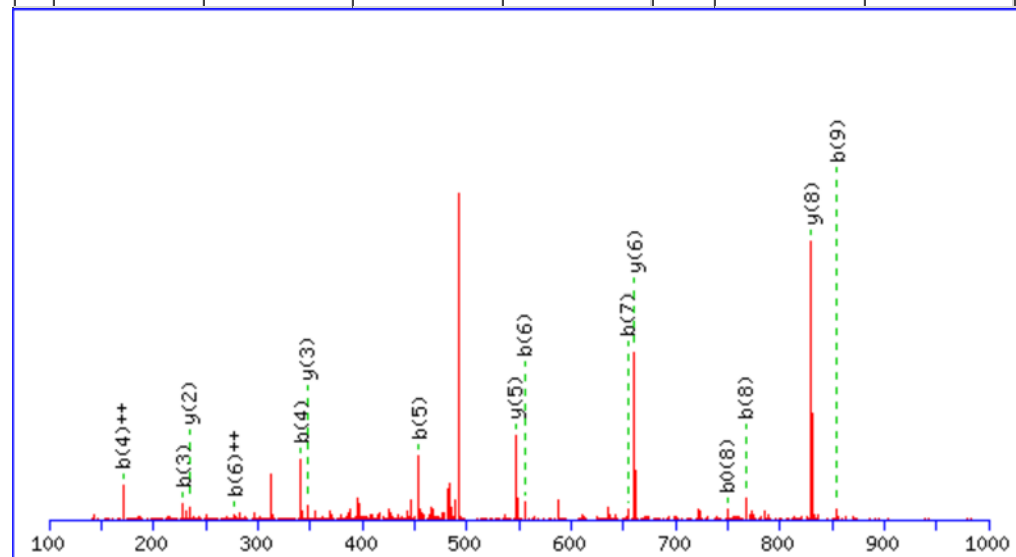

## Peptide View

MS/MS Fragmentation of **SSGLVSNAPGVQIR**

Found in **IPI00022331**, Tax\_Id=9606 Gene\_Symbol=LCAT Phosphatidylcholine-sterol acyltransferase

**Experiment:** 29 - NOPE2 **Fraction:** NOPE2

Match to Query 8588: 1383.747048 from(692.880800,2+)

Title: OECHL100312\_44.11620.11620.2.dta

Data file \\Boromir\masse\Data LTQ-Orbitrap\Chrystelle Lacroix\Etude clinique sJPU\OECHL100312\_44.raw

**Monoisotopic mass of neutral peptide Mr(calc):** 1383.747025 **Fixed modifications:** Carbamidomethyl (C) (apply to specified residues or termini only) **Ions Score:** 55

**Expect:** 0.00029 **Matches :** 15/128 fragment ions using 24 most intense peaks ([help](#))

| #  | b                  | b <sup>++</sup> | b*          | b <sup>*++</sup> | b <sup>0</sup>    | b <sup>0++</sup> | Seq. | y                  | y <sup>++</sup>   | y*          | y <sup>*++</sup> | y <sup>0</sup> | y <sup>0++</sup> | #  |
|----|--------------------|-----------------|-------------|------------------|-------------------|------------------|------|--------------------|-------------------|-------------|------------------|----------------|------------------|----|
| 1  | 88.039304          | 44.523290       |             |                  | 70.028739         | 35.518008        | S    |                    |                   |             |                  |                |                  | 14 |
| 2  | 175.071332         | 88.039304       |             |                  | 157.060767        | 79.034021        | S    | 1297.722275        | 649.364775        | 1280.695726 | 640.851501       | 1279.711710    | 640.359493       | 13 |
| 3  | 232.092796         | 116.550036      |             |                  | 214.082231        | 107.544753       | G    | <b>1210.690247</b> | 605.848762        | 1193.663698 | 597.335487       | 1192.679682    | 596.843479       | 12 |
| 4  | 345.176860         | 173.092068      |             |                  | <b>327.166295</b> | 164.086785       | L    | 1153.668783        | <b>577.338029</b> | 1136.642234 | 568.824755       | 1135.658218    | 568.332747       | 11 |
| 5  | <b>444.245274</b>  | 222.626275      |             |                  | 426.234709        | 213.620993       | V    | <b>1040.584719</b> | 520.795998        | 1023.558170 | 512.282723       | 1022.574154    | 511.790715       | 10 |
| 6  | 531.277302         | 266.142289      |             |                  | 513.266737        | 257.137007       | S    | <b>941.516305</b>  | 471.261790        | 924.489756  | 462.748516       | 923.505740     | 462.256508       | 9  |
| 7  | 645.320229         | 323.163753      | 628.293680  | 314.650478       | 627.309664        | 314.158470       | N    | <b>854.484277</b>  | 427.745776        | 837.457728  | 419.232502       |                |                  | 8  |
| 8  | <b>716.357343</b>  | 358.682310      | 699.330794  | 350.169035       | 698.346778        | 349.677027       | A    | <b>740.441350</b>  | 370.724313        | 723.414801  | 362.211038       |                |                  | 7  |
| 9  | 813.410107         | 407.208692      | 796.383558  | 398.695417       | 795.399542        | 398.203409       | P    | <b>669.404236</b>  | 335.205756        | 652.377687  | 326.692481       |                |                  | 6  |
| 10 | 870.431571         | 435.719424      | 853.405022  | 427.206149       | 852.421006        | 426.714141       | G    | 572.351472         | <b>286.679374</b> | 555.324923  | 278.166099       |                |                  | 5  |
| 11 | 969.499985         | 485.253631      | 952.473436  | 476.740356       | 951.489420        | 476.248348       | V    | 515.330008         | 258.168642        | 498.303459  | 249.655367       |                |                  | 4  |
| 12 | <b>1097.558563</b> | 549.282920      | 1080.532014 | 540.769645       | 1079.547998       | 540.277637       | Q    | <b>416.261594</b>  | 208.634435        | 399.235045  | 200.121160       |                |                  | 3  |
| 13 | <b>1210.642627</b> | 605.824952      | 1193.616078 | 597.311677       | 1192.632062       | 596.819669       | I    | <b>288.203016</b>  | 144.605146        | 271.176467  | 136.091871       |                |                  | 2  |
| 14 |                    |                 |             |                  |                   |                  | R    | 175.118952         | 88.063114         | 158.092403  | 79.549839        |                |                  | 1  |

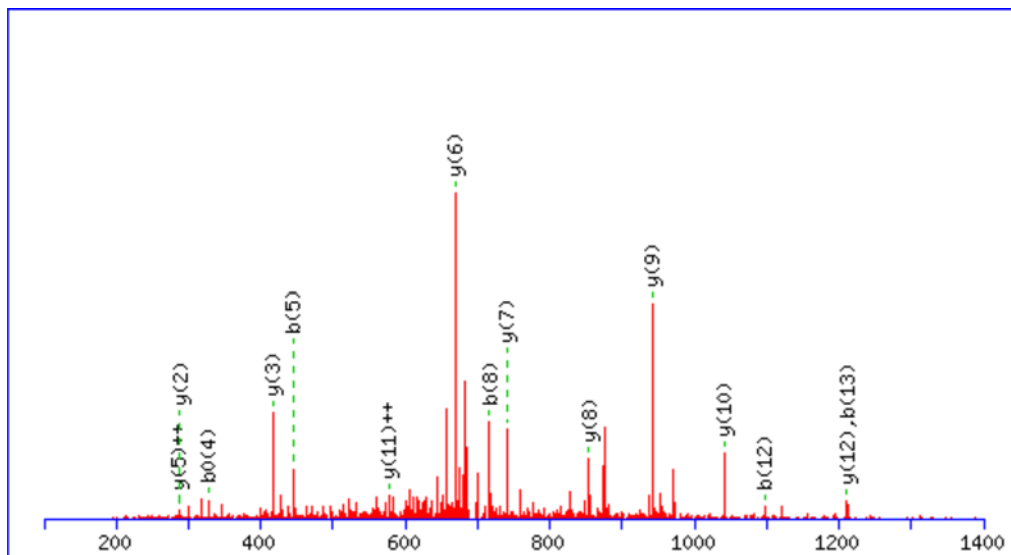

## Peptide View

MS/MS Fragmentation of **LAADDPEVR**

Found in **IPI00025840**, Tax\_Id=9606 Gene\_Symbol=EFNA1 Isoform 1 of Ephrin-A1

**Experiment:** 29 - NOPE2 **Fraction:** NOPE2

Match to Query 3251: 984.488648 from(493.251600,2+)

Title: OECHL100312\_44.5107.5107.2.dta

Data file \\Boromir\masse\Data LTQ-Orbitrap\Chrystelle Lacroix\Etude clinique sJPU\OECHL100312\_44.raw

**Monoisotopic mass of neutral peptide Mr(calc):** 984.487610 **Fixed modifications:** Carbamidomethyl (C) (apply to specified residues or termini only) **Ions Score:** 53

**Expect:** 0.0004 **Matches :** 15/70 fragment ions using 27 most intense peaks ([help](#))

| # | b                 | b <sup>++</sup> | b <sup>0</sup> | b <sup>0++</sup> | Seq. | y                 | y <sup>++</sup>   | y <sup>*</sup> | y <sup>*++</sup> | y <sup>0</sup>    | y <sup>0++</sup> | # |
|---|-------------------|-----------------|----------------|------------------|------|-------------------|-------------------|----------------|------------------|-------------------|------------------|---|
| 1 | 114.091340        | 57.549308       |                |                  | L    |                   |                   |                |                  |                   |                  | 9 |
| 2 | <b>185.128454</b> | 93.067865       |                |                  | A    | <b>872.410837</b> | <b>436.709057</b> | 855.384288     | 428.195782       | 854.400272        | 427.703774       | 8 |
| 3 | <b>256.165568</b> | 128.586422      |                |                  | A    | <b>801.373723</b> | <b>401.190500</b> | 784.347174     | 392.677225       | 783.363158        | 392.185217       | 7 |
| 4 | <b>371.192511</b> | 186.099893      | 353.181946     | 177.094611       | D    | <b>730.336609</b> | 365.671943        | 713.310060     | 357.158668       | <b>712.326044</b> | 356.666660       | 6 |
| 5 | <b>486.219454</b> | 243.613365      | 468.208889     | 234.608082       | D    | <b>615.309666</b> | 308.158471        | 598.283117     | 299.645197       | 597.299101        | 299.153189       | 5 |
| 6 | 583.272218        | 292.139747      | 565.261653     | 283.134465       | P    | <b>500.282723</b> | 250.644999        | 483.256174     | 242.131725       | 482.272158        | 241.639717       | 4 |



|   |                   |            |            |            |   |                   |            |            |            |            |            |   |
|---|-------------------|------------|------------|------------|---|-------------------|------------|------------|------------|------------|------------|---|
| 7 | <b>712.314811</b> | 356.661044 | 694.304246 | 347.655761 | E | 403.229959        | 202.118617 | 386.203410 | 193.605343 | 385.219394 | 193.113335 | 3 |
| 8 | 811.383225        | 406.195251 | 793.372660 | 397.189968 | V | <b>274.187366</b> | 137.597321 | 257.160817 | 129.084046 |            |            | 2 |
| 9 |                   |            |            |            | R | <b>175.118952</b> | 88.063114  | 158.092403 | 79.549839  |            |            | 1 |

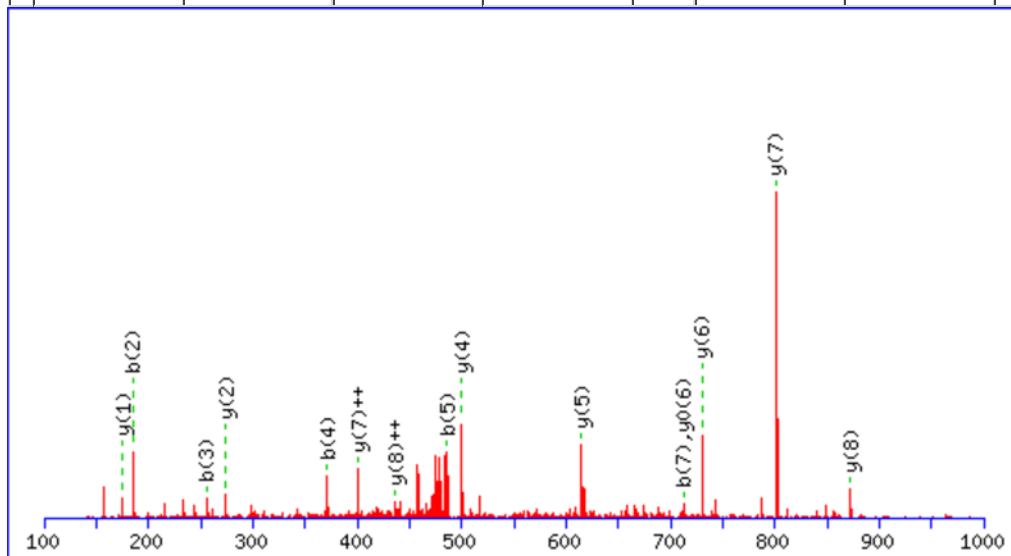

## Peptide View

MS/MS Fragmentation of **TDTCMSSNGLLCSGR**

Found in **IP100220350**, Tax\_Id=9606 Gene\_Symbol=ITGB3 Isoform Beta-3B of Integrin beta-3

**Experiment:** 29 - NOPE2 **Fraction:** NOPE2

Match to Query 11328: 1657.686248 from(829.850400,2+)

Title: OECHL100312\_44.11034.11034.2.dta

Data file \\Boromir\masse\Data LTQ-Orbitrap\Chrystelle Lacroix\Etude clinique sJPU\OECHL100312\_44.raw

**Monoisotopic mass of neutral peptide Mr(calc):** 1657.685837 **Fixed modifications:** Carbamidomethyl (C) (apply to specified residues or termini only) **Ions Score:** 51

**Expect:** 0.00018 **Matches :** 39/150 fragment ions using 68 most intense peaks ([help](#))

| # | b                 | b <sup>++</sup> | b* | b <sup>*++</sup> | b <sup>0</sup> | b <sup>0++</sup> | Seq. | y           | y <sup>++</sup>   | y*          | y <sup>*++</sup>  | y <sup>0</sup> | y <sup>0++</sup>  | #  |
|---|-------------------|-----------------|----|------------------|----------------|------------------|------|-------------|-------------------|-------------|-------------------|----------------|-------------------|----|
| 1 | 102.054955        | 51.531116       |    |                  | 84.044390      | 42.525833        | T    |             |                   |             |                   |                |                   | 15 |
| 2 | 217.081898        | 109.044587      |    |                  | 199.071333     | 100.039304       | D    | 1557.645424 | 779.326350        | 1540.618875 | 770.813075        | 1539.634859    | 770.321067        | 14 |
| 3 | <b>318.129577</b> | 159.568426      |    |                  | 300.119012     | 150.563144       | T    | 1442.618481 | <b>721.812878</b> | 1425.591932 | <b>713.299604</b> | 1424.607916    | <b>712.807596</b> | 13 |

|    |             |            |             |            |             |            |   |             |            |             |            |             |            |    |
|----|-------------|------------|-------------|------------|-------------|------------|---|-------------|------------|-------------|------------|-------------|------------|----|
| 4  | 478.160226  | 239.583751 |             |            | 460.149661  | 230.578469 | C | 1341.570802 | 671.289039 | 1324.544253 | 662.775765 | 1323.560237 | 662.283756 | 12 |
| 5  | 609.200711  | 305.103994 |             |            | 591.190146  | 296.098711 | M | 1181.540153 | 591.273714 | 1164.513604 | 582.760440 | 1163.529588 | 582.268432 | 11 |
| 6  | 696.232739  | 348.620008 |             |            | 678.222174  | 339.614725 | S | 1050.499668 | 525.753472 | 1033.473119 | 517.240197 | 1032.489103 | 516.748189 | 10 |
| 7  | 783.264767  | 392.136022 |             |            | 765.254202  | 383.130739 | S | 963.467640  | 482.237458 | 946.441091  | 473.724183 | 945.457075  | 473.232175 | 9  |
| 8  | 897.307694  | 449.157485 | 880.281145  | 440.644210 | 879.297129  | 440.152202 | N | 876.435612  | 438.721444 | 859.409063  | 430.208169 | 858.425047  | 429.716161 | 8  |
| 9  | 954.329158  | 477.668217 | 937.302609  | 469.154943 | 936.318593  | 468.662935 | G | 762.392685  | 381.699980 | 745.366136  | 373.186706 | 744.382120  | 372.694698 | 7  |
| 10 | 1067.413222 | 534.210249 | 1050.386673 | 525.696975 | 1049.402657 | 525.204966 | L | 705.371221  | 353.189248 | 688.344672  | 344.675974 | 687.360656  | 344.183966 | 6  |
| 11 | 1180.497286 | 590.752281 | 1163.470737 | 582.239006 | 1162.486721 | 581.746998 | L | 592.287157  | 296.647217 | 575.260608  | 288.133942 | 574.276592  | 287.641934 | 5  |
| 12 | 1340.527935 | 670.767605 | 1323.501386 | 662.254331 | 1322.517370 | 661.762323 | C | 479.203093  | 240.105184 | 462.176544  | 231.591910 | 461.192528  | 231.099902 | 4  |
| 13 | 1427.559963 | 714.283619 | 1410.533414 | 705.770345 | 1409.549398 | 705.278337 | S | 319.172444  | 160.089860 | 302.145895  | 151.576585 | 301.161879  | 151.084577 | 3  |
| 14 | 1484.581427 | 742.794351 | 1467.554878 | 734.281077 | 1466.570862 | 733.789069 | G | 232.140416  | 116.573846 | 215.113867  | 108.060571 |             |            | 2  |
| 15 |             |            |             |            |             |            | R | 175.118952  | 88.063114  | 158.092403  | 79.549839  |             |            | 1  |

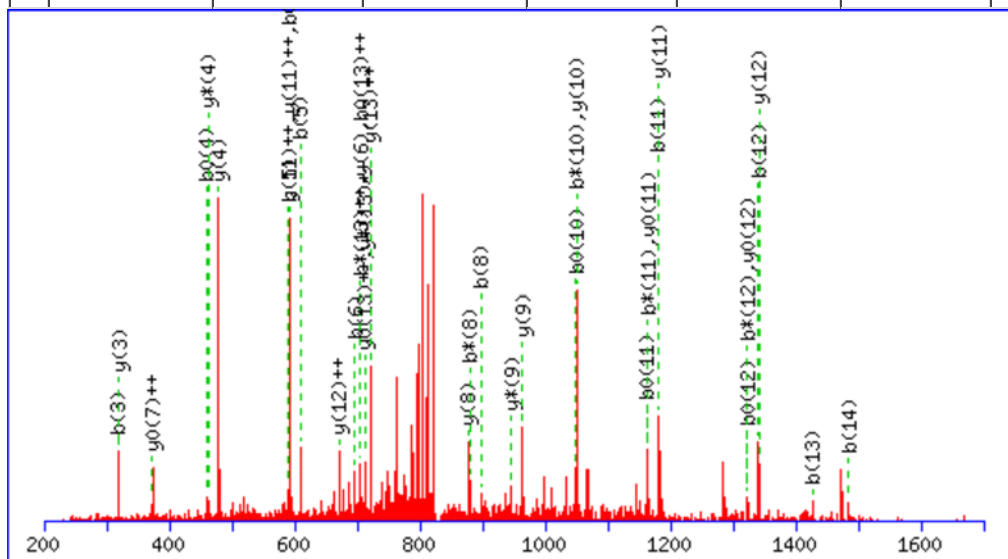

## Peptide View

MS/MS Fragmentation of **EVQLVESGGGLVKGGSRLR**

Found in **IP100783024**, Tax\_Id=9606 Gene\_Symbol=- Myosin-reactive immunoglobulin heavy chain variable region (Fragment)

Experiment: 29 - NOPE2 Fraction: NOPE2

Match to Query 13579: 1881.031248 from(941.522900,2+)

Title: OECHL100312\_44.13733.13733.2.dta

Data file \\Boromir\masse\Data LTQ-Orbitrap\Chrystelle Lacroix\Etude clinique sJPU\OECHL100312\_44.raw

**Monoisotopic mass of neutral peptide Mr(calc):** 1881.031982**Fixed modifications:** Carbamidomethyl (C) (apply to specified residues or termini only)**Ions Score:** 50**Expect:** 0.00061**Matches :** 21/208 fragment ions using 32 most intense peaks ([help](#))

| #  | b           | b <sup>++</sup> | b <sup>*</sup> | b <sup>*++</sup> | b <sup>0</sup> | b <sup>0++</sup> | Seq. | y           | y <sup>++</sup> | y <sup>*</sup> | y <sup>*++</sup> | y <sup>0</sup> | y <sup>0++</sup> | #  |
|----|-------------|-----------------|----------------|------------------|----------------|------------------|------|-------------|-----------------|----------------|------------------|----------------|------------------|----|
| 1  | 130.049869  | 65.528572       |                |                  | 112.039304     | 56.523290        | E    |             |                 |                |                  |                |                  | 19 |
| 2  | 229.118283  | 115.062780      |                |                  | 211.107718     | 106.057497       | V    | 1752.996660 | 877.001968      | 1735.970111    | 868.488694       | 1734.986095    | 867.996686       | 18 |
| 3  | 357.176861  | 179.092069      | 340.150312     | 170.578794       | 339.166296     | 170.086786       | Q    | 1653.928246 | 827.467761      | 1636.901697    | 818.954487       | 1635.917681    | 818.462479       | 17 |
| 4  | 470.260925  | 235.634101      | 453.234376     | 227.120826       | 452.250360     | 226.628818       | L    | 1525.869668 | 763.438472      | 1508.843119    | 754.925198       | 1507.859103    | 754.433190       | 16 |
| 5  | 569.329339  | 285.168308      | 552.302790     | 276.655033       | 551.318774     | 276.163025       | V    | 1412.785604 | 706.896440      | 1395.759055    | 698.383166       | 1394.775039    | 697.891158       | 15 |
| 6  | 698.371932  | 349.689604      | 681.345383     | 341.176330       | 680.361367     | 340.684322       | E    | 1313.717190 | 657.362233      | 1296.690641    | 648.848959       | 1295.706625    | 648.356951       | 14 |
| 7  | 785.403960  | 393.205618      | 768.377411     | 384.692344       | 767.393395     | 384.200336       | S    | 1184.674597 | 592.840937      | 1167.648048    | 584.327662       | 1166.664032    | 583.835654       | 13 |
| 8  | 842.425424  | 421.716350      | 825.398875     | 413.203076       | 824.414859     | 412.711068       | G    | 1097.642569 | 549.324923      | 1080.616020    | 540.811648       | 1079.632004    | 540.319640       | 12 |
| 9  | 899.446888  | 450.227082      | 882.420339     | 441.713808       | 881.436323     | 441.221800       | G    | 1040.621105 | 520.814191      | 1023.594556    | 512.300916       | 1022.610540    | 511.808908       | 11 |
| 10 | 956.468352  | 478.737814      | 939.441803     | 470.224540       | 938.457787     | 469.732532       | G    | 983.599641  | 492.303459      | 966.573092     | 483.790184       | 965.589076     | 483.298176       | 10 |
| 11 | 1069.552416 | 535.279846      | 1052.525867    | 526.766572       | 1051.541851    | 526.274564       | L    | 926.578177  | 463.792727      | 909.551628     | 455.279452       | 908.567612     | 454.787444       | 9  |
| 12 | 1168.620830 | 584.814053      | 1151.594281    | 576.300779       | 1150.610265    | 575.808771       | V    | 813.494113  | 407.250695      | 796.467564     | 398.737420       | 795.483548     | 398.245412       | 8  |
| 13 | 1296.715793 | 648.861535      | 1279.689244    | 640.348260       | 1278.705228    | 639.856252       | K    | 714.425699  | 357.716487      | 697.399150     | 349.203213       | 696.415134     | 348.711205       | 7  |
| 14 | 1393.768557 | 697.387917      | 1376.742008    | 688.874642       | 1375.757992    | 688.382634       | P    | 586.330736  | 293.669006      | 569.304187     | 285.155731       | 568.320171     | 284.663723       | 6  |
| 15 | 1450.790021 | 725.898649      | 1433.763472    | 717.385374       | 1432.779456    | 716.893366       | G    | 489.277972  | 245.142624      | 472.251423     | 236.629349       | 471.267407     | 236.137341       | 5  |
| 16 | 1507.811485 | 754.409381      | 1490.784936    | 745.896106       | 1489.800920    | 745.404098       | G    | 432.256508  | 216.631892      | 415.229959     | 208.118617       | 414.245943     | 207.626609       | 4  |
| 17 | 1594.843513 | 797.925395      | 1577.816964    | 789.412120       | 1576.832948    | 788.920112       | S    | 375.235044  | 188.121160      | 358.208495     | 179.607885       | 357.224479     | 179.115877       | 3  |
| 18 | 1707.927577 | 854.467427      | 1690.901028    | 845.954152       | 1689.917012    | 845.462144       | L    | 288.203016  | 144.605146      | 271.176467     | 136.091871       |                |                  | 2  |
| 19 |             |                 |                |                  |                |                  | R    | 175.118952  | 88.063114       | 158.092403     | 79.549839        |                |                  | 1  |

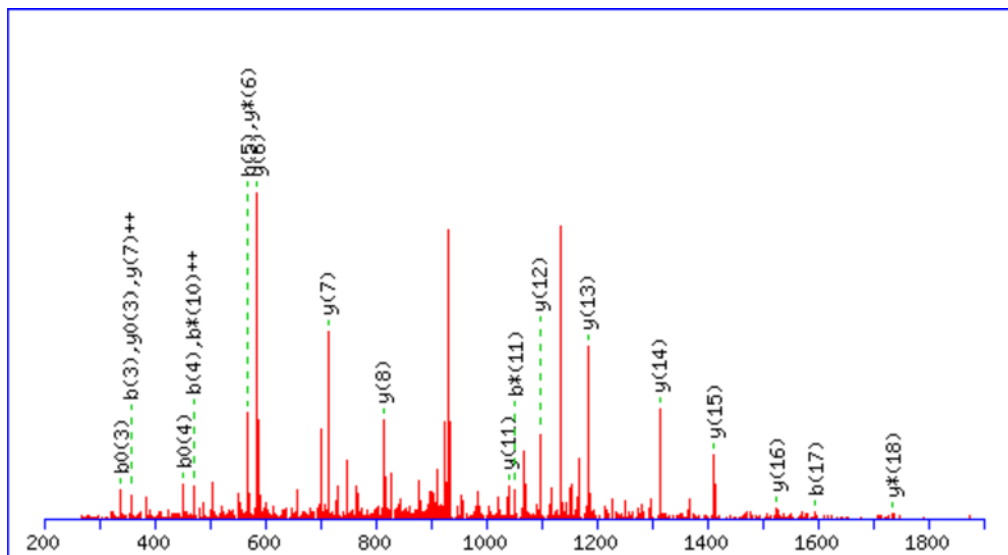

## Peptide View

MS/MS Fragmentation of **NPVLQQDAHSSVTITPQR**

Found in **IPI00410488**, Tax\_Id=9606 Gene\_Symbol=CD276 Isoform 1 of CD276 antigen

**Experiment:** 11 - S\_D-2 **Fraction:** S\_D-2

Match to Query 16309: 1990.024048 from(996.019300,2+)

Title: OECHL100312\_42.10195.10195.2.dta

Data file \\Boromir\masse\Data LTQ-Orbitrap\Chrystelle Lacroix\Etude clinique sJPU\OECHL100312\_42.raw

**Monoisotopic mass of neutral peptide Mr(calc):** 1990.023209 **Fixed modifications:** Carbamidomethyl (C) (apply to specified residues or termini only) **Ions Score:** 90

**Expect:** 1.2e-007 **Matches :** 15/186 fragment ions using 16 most intense peaks ([help](#))

| # | b                 | b <sup>++</sup> | b*         | b* <sup>++</sup> | b <sup>0</sup> | b <sup>0++</sup> | Seq. | y                  | y <sup>++</sup>   | y*          | y* <sup>++</sup> | y <sup>0</sup> | y <sup>0++</sup> | #  |
|---|-------------------|-----------------|------------|------------------|----------------|------------------|------|--------------------|-------------------|-------------|------------------|----------------|------------------|----|
| 1 | 115.050203        | 58.028740       | 98.023654  | 49.515465        |                |                  | N    |                    |                   |             |                  |                |                  | 18 |
| 2 | 212.102967        | 106.555121      | 195.076418 | 98.041847        |                |                  | P    | 1876.987553        | 938.997415        | 1859.961004 | 930.484140       | 1858.976988    | 929.992132       | 17 |
| 3 | <b>311.171381</b> | 156.089328      | 294.144832 | 147.576054       |                |                  | V    | <b>1779.934789</b> | 890.471033        | 1762.908240 | 881.957758       | 1761.924224    | 881.465750       | 16 |
| 4 | 424.255445        | 212.631361      | 407.228896 | 204.118086       |                |                  | L    | <b>1680.866375</b> | <b>840.936826</b> | 1663.839826 | 832.423551       | 1662.855810    | 831.931543       | 15 |
| 5 | 552.314023        | 276.660650      | 535.287474 | 268.147375       |                |                  | Q    | 1567.782311        | 784.394794        | 1550.755762 | 775.881519       | 1549.771746    | 775.389511       | 14 |
| 6 | 680.372601        | 340.689939      | 663.346052 | 332.176664       |                |                  | Q    | 1439.723733        | 720.365505        | 1422.697184 | 711.852230       | 1421.713168    | 711.360222       | 13 |

|    |                    |            |             |            |             |            |   |                    |            |             |            |             |            |    |
|----|--------------------|------------|-------------|------------|-------------|------------|---|--------------------|------------|-------------|------------|-------------|------------|----|
| 7  | 795.399544         | 398.203410 | 778.372995  | 389.690136 | 777.388979  | 389.198128 | D | <b>1311.665155</b> | 656.336215 | 1294.638606 | 647.822941 | 1293.654590 | 647.330933 | 12 |
| 8  | 866.436658         | 433.721967 | 849.410109  | 425.208693 | 848.426093  | 424.716685 | A | <b>1196.638212</b> | 598.822744 | 1179.611663 | 590.309470 | 1178.627647 | 589.817462 | 11 |
| 9  | 1003.495570        | 502.251423 | 986.469021  | 493.738149 | 985.485005  | 493.246141 | H | <b>1125.601098</b> | 563.304187 | 1108.574549 | 554.790913 | 1107.590533 | 554.298905 | 10 |
| 10 | <b>1090.527598</b> | 545.767437 | 1073.501049 | 537.254163 | 1072.517033 | 536.762155 | S | <b>988.542186</b>  | 494.774731 | 971.515637  | 486.261457 | 970.531621  | 485.769449 | 9  |
| 11 | 1177.559626        | 589.283451 | 1160.533077 | 580.770177 | 1159.549061 | 580.278169 | S | 901.510158         | 451.258717 | 884.483609  | 442.745443 | 883.499593  | 442.253435 | 8  |
| 12 | 1276.628040        | 638.817658 | 1259.601491 | 630.304384 | 1258.617475 | 629.812376 | V | 814.478130         | 407.742703 | 797.451581  | 399.229428 | 796.467565  | 398.737420 | 7  |
| 13 | 1377.675719        | 689.341498 | 1360.649170 | 680.828223 | 1359.665154 | 680.336215 | T | <b>715.409716</b>  | 358.208496 | 698.383167  | 349.695221 | 697.399151  | 349.203213 | 6  |
| 14 | <b>1490.759783</b> | 745.883530 | 1473.733234 | 737.370255 | 1472.749218 | 736.878247 | I | <b>614.362037</b>  | 307.684656 | 597.335488  | 299.171382 | 596.351472  | 298.679374 | 5  |
| 15 | <b>1591.807462</b> | 796.407369 | 1574.780913 | 787.894095 | 1573.796897 | 787.402087 | T | <b>501.277973</b>  | 251.142624 | 484.251424  | 242.629350 | 483.267408  | 242.137342 | 4  |
| 16 | 1688.860226        | 844.933751 | 1671.833677 | 836.420477 | 1670.849661 | 835.928469 | P | <b>400.230294</b>  | 200.618785 | 383.203745  | 192.105510 |             |            | 3  |
| 17 | 1816.918804        | 908.963040 | 1799.892255 | 900.449766 | 1798.908239 | 899.957758 | Q | 303.177530         | 152.092403 | 286.150981  | 143.579128 |             |            | 2  |
| 18 |                    |            |             |            |             |            | R | 175.118952         | 88.063114  | 158.092403  | 79.549839  |             |            | 1  |

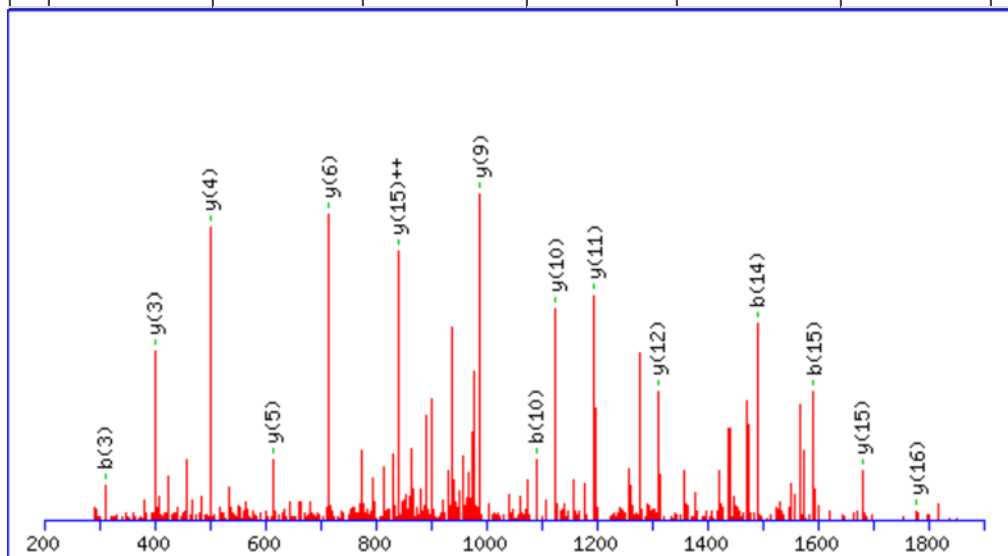

## Peptide View

MS/MS Fragmentation of **AHGQESAI FNEVAPGYFSR**

Found in **IP100170635**, Tax\_Id=9606 Gene\_Symbol=SECTM1 Secreted and transmembrane protein 1

Experiment: 11 - S\_D-2 Fraction: S\_D-2

Match to Query 16860: 2078.983448 from(1040.499000,2+)

Title: OECHL100312\_42.17986.17986.2.dta

Data file \\Boromir\masse\Data LTQ-Orbitrap\Chrystelle Lacroix\Etude clinique sJPU\OECHL100312\_42.raw

**Monoisotopic mass of neutral peptide Mr(calc):** 2078.980988**Fixed modifications:** Carbamidomethyl (C) (apply to specified residues or termini only)**Ions Score:** 87**Expect:** 3.1e-007**Matches :** 36/200 fragment ions using 62 most intense peaks ([help](#))

| #  | b           | b <sup>++</sup> | b*          | b <sup>*++</sup> | b <sup>0</sup> | b <sup>0++</sup> | Seq. | y           | y <sup>++</sup> | y*          | y <sup>*++</sup> | y <sup>0</sup> | y <sup>0++</sup> | #  |
|----|-------------|-----------------|-------------|------------------|----------------|------------------|------|-------------|-----------------|-------------|------------------|----------------|------------------|----|
| 1  | 72.044390   | 36.525833       |             |                  |                |                  | A    |             |                 |             |                  |                |                  | 19 |
| 2  | 209.103302  | 105.055289      |             |                  |                |                  | H    | 2008.951166 | 1004.979221     | 1991.924617 | 996.465947       | 1990.940601    | 995.973939       | 18 |
| 3  | 266.124766  | 133.566021      |             |                  |                |                  | G    | 1871.892254 | 936.449765      | 1854.865705 | 927.936491       | 1853.881689    | 927.444483       | 17 |
| 4  | 394.183344  | 197.595310      | 377.156795  | 189.082035       |                |                  | Q    | 1814.870790 | 907.939033      | 1797.844241 | 899.425759       | 1796.860225    | 898.933751       | 16 |
| 5  | 523.225937  | 262.116607      | 506.199388  | 253.603332       | 505.215372     | 253.111324       | E    | 1686.812212 | 843.909744      | 1669.785663 | 835.396470       | 1668.801647    | 834.904462       | 15 |
| 6  | 610.257965  | 305.632621      | 593.231416  | 297.119346       | 592.247400     | 296.627338       | S    | 1557.769619 | 779.388448      | 1540.743070 | 770.875173       | 1539.759054    | 770.383165       | 14 |
| 7  | 681.295079  | 341.151178      | 664.268530  | 332.637903       | 663.284514     | 332.145895       | A    | 1470.737591 | 735.872434      | 1453.711042 | 727.359159       | 1452.727026    | 726.867151       | 13 |
| 8  | 794.379143  | 397.693210      | 777.352594  | 389.179935       | 776.368578     | 388.687927       | I    | 1399.700477 | 700.353877      | 1382.673928 | 691.840602       | 1381.689912    | 691.348594       | 12 |
| 9  | 941.447557  | 471.227417      | 924.421008  | 462.714142       | 923.436992     | 462.222134       | F    | 1286.616413 | 643.811845      | 1269.589864 | 635.298570       | 1268.605848    | 634.806562       | 11 |
| 10 | 1055.490484 | 528.248880      | 1038.463935 | 519.735606       | 1037.479919    | 519.243597       | N    | 1139.547999 | 570.277638      | 1122.521450 | 561.764363       | 1121.537434    | 561.272355       | 10 |
| 11 | 1184.533077 | 592.770176      | 1167.506528 | 584.256902       | 1166.522512    | 583.764894       | E    | 1025.505072 | 513.256174      | 1008.478523 | 504.742900       | 1007.494507    | 504.250892       | 9  |
| 12 | 1283.601491 | 642.304383      | 1266.574942 | 633.791109       | 1265.590926    | 633.299101       | V    | 896.462479  | 448.734878      | 879.435930  | 440.221603       | 878.451914     | 439.729595       | 8  |
| 13 | 1354.638605 | 677.822940      | 1337.612056 | 669.309666       | 1336.628040    | 668.817658       | A    | 797.394065  | 399.200671      | 780.367516  | 390.687396       | 779.383500     | 390.195388       | 7  |
| 14 | 1451.691369 | 726.349322      | 1434.664820 | 717.836048       | 1433.680804    | 717.344040       | P    | 726.356951  | 363.682114      | 709.330402  | 355.168839       | 708.346386     | 354.676831       | 6  |
| 15 | 1508.712833 | 754.860054      | 1491.686284 | 746.346780       | 1490.702268    | 745.854772       | G    | 629.304187  | 315.155732      | 612.277638  | 306.642457       | 611.293622     | 306.150449       | 5  |
| 16 | 1671.776162 | 836.391719      | 1654.749613 | 827.878445       | 1653.765597    | 827.386436       | Y    | 572.282723  | 286.645000      | 555.256174  | 278.131725       | 554.272158     | 277.639717       | 4  |
| 17 | 1818.844576 | 909.925926      | 1801.818027 | 901.412652       | 1800.834011    | 900.920643       | F    | 409.219394  | 205.113335      | 392.192845  | 196.600061       | 391.208829     | 196.108053       | 3  |
| 18 | 1905.876604 | 953.441940      | 1888.850055 | 944.928666       | 1887.866039    | 944.436658       | S    | 262.150980  | 131.579128      | 245.124431  | 123.065854       | 244.140415     | 122.573846       | 2  |
| 19 |             |                 |             |                  |                |                  | R    | 175.118952  | 88.063114       | 158.092403  | 79.549840        |                |                  | 1  |

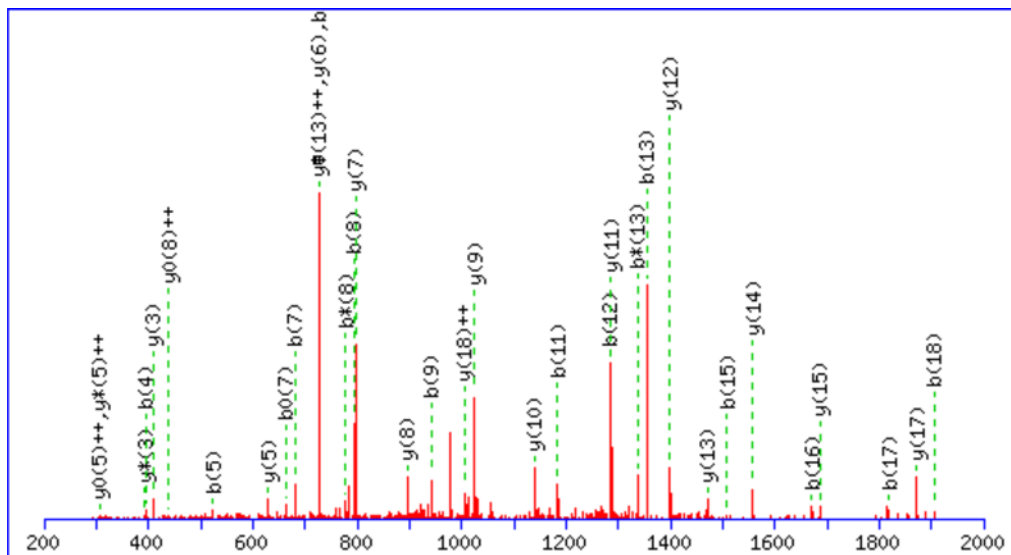

## Peptide View

MS/MS Fragmentation of **CQCPAGAALQADGR**

Found in **IPI00010737**, Tax\_Id=9606 Gene\_Symbol=THBD Thrombomodulin

**Experiment:** 11 - S\_D-2 **Fraction:** S\_D-2

Match to Query 11464: 1473.646248 from(737.830400,2+)

Title: OECHL100312\_42.7775.7775.2.dta

Data file \\Boromir\masse\Data LTQ-Orbitrap\Chrystelle Lacroix\Etude clinique sJPU\OECHL100312\_42.raw

**Monoisotopic mass of neutral peptide Mr(calc):** 1473.645279 **Fixed modifications:** Carbamidomethyl (C) (apply to specified residues or termini only) **Ions Score:** 65

**Expect:** 1.5e-005 **Matches :** 20/128 fragment ions using 38 most intense peaks ([help](#))

| # | b                 | b <sup>++</sup> | b*                | b* <sup>++</sup> | b <sup>0</sup> | b <sup>0++</sup> | Seq. | y                  | y <sup>++</sup>   | y*          | y* <sup>++</sup> | y <sup>0</sup> | y <sup>0++</sup> | #  |
|---|-------------------|-----------------|-------------------|------------------|----------------|------------------|------|--------------------|-------------------|-------------|------------------|----------------|------------------|----|
| 1 | 161.037925        | 81.022600       |                   |                  |                |                  | C    |                    |                   |             |                  |                |                  | 14 |
| 2 | <b>289.096503</b> | 145.051890      | <b>272.069954</b> | 136.538615       |                |                  | Q    | 1314.621912        | 657.814594        | 1297.595363 | 649.301320       | 1296.611347    | 648.809312       | 13 |
| 3 | <b>449.127152</b> | 225.067214      | 432.100603        | 216.553940       |                |                  | C    | <b>1186.563334</b> | <b>593.785305</b> | 1169.536785 | 585.272031       | 1168.552769    | 584.780023       | 12 |
| 4 | <b>546.179916</b> | 273.593596      | 529.153367        | 265.080322       |                |                  | P    | <b>1026.532685</b> | 513.769981        | 1009.506136 | 505.256706       | 1008.522120    | 504.764698       | 11 |
| 5 | <b>617.217030</b> | 309.112153      | 600.190481        | 300.598879       |                |                  | A    | <b>929.479921</b>  | 465.243599        | 912.453372  | 456.730324       | 911.469356     | 456.238316       | 10 |
| 6 | 674.238494        | 337.622885      | 657.211945        | 329.109611       |                |                  | G    | <b>858.442807</b>  | 429.725042        | 841.416258  | 421.211767       | 840.432242     | 420.719759       | 9  |

|    |                    |            |             |            |             |            |   |                   |            |            |            |            |            |   |
|----|--------------------|------------|-------------|------------|-------------|------------|---|-------------------|------------|------------|------------|------------|------------|---|
| 7  | 745.275608         | 373.141442 | 728.249059  | 364.628168 |             |            | A | 801.421343        | 401.214310 | 784.394794 | 392.701035 | 783.410778 | 392.209027 | 8 |
| 8  | <b>816.312722</b>  | 408.659999 | 799.286173  | 400.146725 |             |            | A | 730.384229        | 365.695753 | 713.357680 | 357.182478 | 712.373664 | 356.690470 | 7 |
| 9  | <b>929.396786</b>  | 465.202031 | 912.370237  | 456.688757 |             |            | L | <b>659.347115</b> | 330.177196 | 642.320566 | 321.663921 | 641.336550 | 321.171913 | 6 |
| 10 | <b>1057.455364</b> | 529.231320 | 1040.428815 | 520.718046 |             |            | Q | <b>546.263051</b> | 273.635164 | 529.236502 | 265.121889 | 528.252486 | 264.629881 | 5 |
| 11 | <b>1128.492478</b> | 564.749877 | 1111.465929 | 556.236603 |             |            | A | <b>418.204473</b> | 209.605874 | 401.177924 | 201.092600 | 400.193908 | 200.600592 | 4 |
| 12 | <b>1243.519421</b> | 622.263349 | 1226.492872 | 613.750074 | 1225.508856 | 613.258066 | D | 347.167359        | 174.087317 | 330.140810 | 165.574043 | 329.156794 | 165.082035 | 3 |
| 13 | <b>1300.540885</b> | 650.774081 | 1283.514336 | 642.260806 | 1282.530320 | 641.768798 | G | <b>232.140416</b> | 116.573846 | 215.113867 | 108.060571 |            |            | 2 |
| 14 |                    |            |             |            |             |            | R | 175.118952        | 88.063114  | 158.092403 | 79.549839  |            |            | 1 |

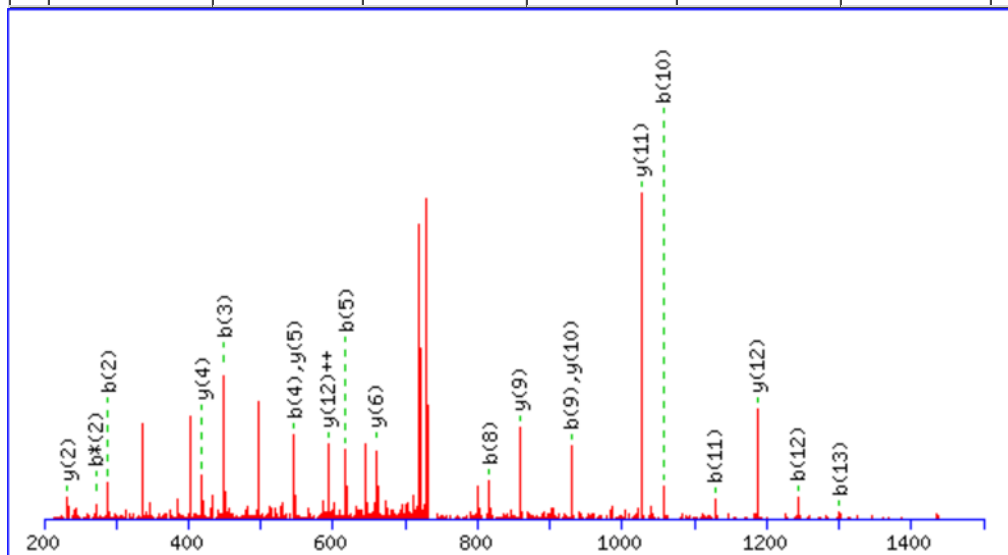

## Peptide View

MS/MS Fragmentation of **VYSTSVTGSR**

Found in **IPI00010402**, Tax\_Id=9606 Gene\_Symbol=SH3BGRL3 Putative uncharacterized protein

**Experiment:** 11 - S\_D-2 **Fraction:** S\_D-2

Match to Query 5394: 1055.524048 from(528.769300,2+)

Title: OECHL100312\_42.4711.4711.2.dta

Data file \\Boromir\masse\Data LTQ-Orbitrap\Chrystelle Lacroix\Etude clinique sJPU\OECHL100312\_42.raw

**Monoisotopic mass of neutral peptide Mr(calc):** 1055.524750 **Fixed modifications:** Carbamidomethyl (C) (apply to specified residues or termini only) **Ions Score:** 54



**Expect:** 0.00031**Matches :** 8/84 fragment ions using 9 most intense peaks ([help](#))

| #  | b          | b <sup>++</sup> | b <sup>0</sup> | b <sup>0++</sup> | Seq. | y          | y <sup>++</sup> | y*         | y <sup>*++</sup> | y <sup>0</sup> | y <sup>0++</sup> | #  |
|----|------------|-----------------|----------------|------------------|------|------------|-----------------|------------|------------------|----------------|------------------|----|
| 1  | 100.075690 | 50.541483       |                |                  | V    |            |                 |            |                  |                |                  | 10 |
| 2  | 263.139019 | 132.073148      |                |                  | Y    | 957.463601 | 479.235439      | 940.437052 | 470.722164       | 939.453036     | 470.230156       | 9  |
| 3  | 350.171047 | 175.589161      | 332.160482     | 166.583879       | S    | 794.400272 | 397.703774      | 777.373723 | 389.190499       | 776.389707     | 388.698491       | 8  |
| 4  | 451.218726 | 226.113001      | 433.208161     | 217.107719       | T    | 707.368244 | 354.187760      | 690.341695 | 345.674486       | 689.357679     | 345.182478       | 7  |
| 5  | 538.250754 | 269.629015      | 520.240189     | 260.623733       | S    | 606.320565 | 303.663921      | 589.294016 | 295.150646       | 588.310000     | 294.658638       | 6  |
| 6  | 637.319168 | 319.163222      | 619.308603     | 310.157940       | V    | 519.288537 | 260.147907      | 502.261988 | 251.634632       | 501.277972     | 251.142624       | 5  |
| 7  | 738.366847 | 369.687062      | 720.356282     | 360.681779       | T    | 420.220123 | 210.613699      | 403.193574 | 202.100425       | 402.209558     | 201.608417       | 4  |
| 8  | 795.388311 | 398.197794      | 777.377746     | 389.192511       | G    | 319.172444 | 160.089860      | 302.145895 | 151.576585       | 301.161879     | 151.084577       | 3  |
| 9  | 882.420339 | 441.713808      | 864.409774     | 432.708525       | S    | 262.150980 | 131.579128      | 245.124431 | 123.065853       | 244.140415     | 122.573845       | 2  |
| 10 |            |                 |                |                  | R    | 175.118952 | 88.063114       | 158.092403 | 79.549839        |                |                  | 1  |

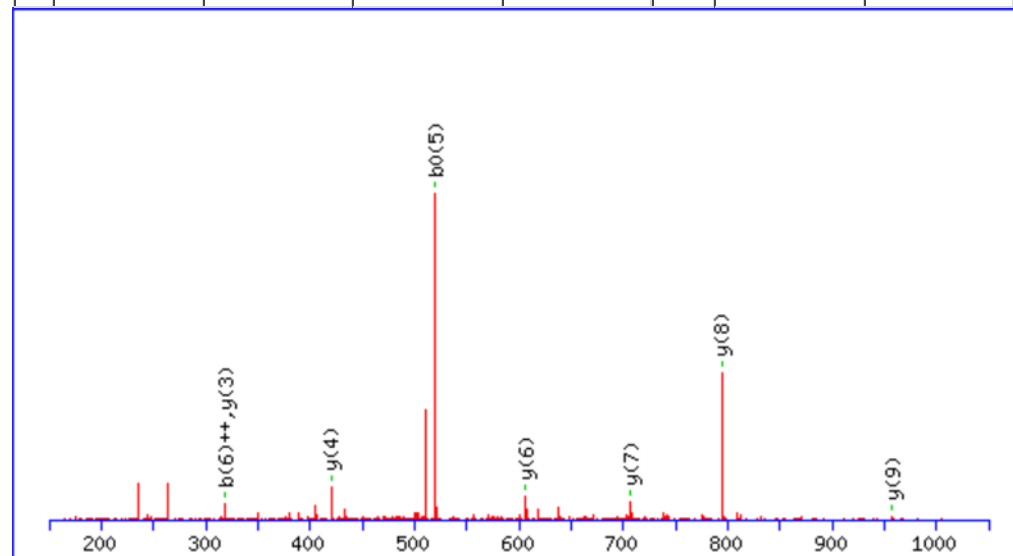

## Peptide View

MS/MS Fragmentation of **SDAAVDTSSSEITTK**

Found in **IP100412977**, Tax\_Id=9606 Gene\_Symbol=- Prothymosin alpha

**Experiment:** 11 - S\_D-2 **Fraction:** S\_D-2

Match to Query 11385: 1465.679448 from(733.847000,2+)

Title: OECHL100312\_42.10230.10230.2.dta

Data file \\Boromir\masse\Data LTQ-Orbitrap\Chrystelle Lacroix\Etude clinique sJPU\OECHL100312\_42.raw

**Monoisotopic mass of neutral peptide Mr(calc):** 1465.678391**Fixed modifications:** Carbamidomethyl (C) (apply to specified residues or termini only)**Variable modifications:** N-term : Acetyl (N-term)**Ions Score:** 65 **Expect:** 2.6e-005**Matches :** 25/128 fragment ions using 39 most intense peaks ([help](#))

| #  | b           | b <sup>++</sup> | b <sup>0</sup> | b <sup>0++</sup> | Seq. | y           | y <sup>++</sup> | y <sup>*</sup> | y <sup>*++</sup> | y <sup>0</sup> | y <sup>0++</sup> | #  |
|----|-------------|-----------------|----------------|------------------|------|-------------|-----------------|----------------|------------------|----------------|------------------|----|
| 1  | 130.049869  | 65.528572       | 112.039304     | 56.523290        | S    |             |                 |                |                  |                |                  | 14 |
| 2  | 245.076812  | 123.042044      | 227.066247     | 114.036761       | D    | 1337.643082 | 669.325179      | 1320.616533    | 660.811905       | 1319.632517    | 660.319897       | 13 |
| 3  | 316.113926  | 158.560601      | 298.103361     | 149.555319       | A    | 1222.616139 | 611.811708      | 1205.589590    | 603.298433       | 1204.605574    | 602.806425       | 12 |
| 4  | 387.151040  | 194.079158      | 369.140475     | 185.073875       | A    | 1151.579025 | 576.293151      | 1134.552476    | 567.779876       | 1133.568460    | 567.287868       | 11 |
| 5  | 486.219454  | 243.613365      | 468.208889     | 234.608082       | V    | 1080.541911 | 540.774594      | 1063.515362    | 532.261319       | 1062.531346    | 531.769311       | 10 |
| 6  | 601.246397  | 301.126837      | 583.235832     | 292.121554       | D    | 981.473497  | 491.240387      | 964.446948     | 482.727112       | 963.462932     | 482.235104       | 9  |
| 7  | 702.294076  | 351.650676      | 684.283511     | 342.645394       | T    | 866.446554  | 433.726915      | 849.420005     | 425.213641       | 848.435989     | 424.721633       | 8  |
| 8  | 789.326104  | 395.166690      | 771.315539     | 386.161408       | S    | 765.398875  | 383.203076      | 748.372326     | 374.689801       | 747.388310     | 374.197793       | 7  |
| 9  | 876.358132  | 438.682704      | 858.347567     | 429.677421       | S    | 678.366847  | 339.687062      | 661.340298     | 331.173787       | 660.356282     | 330.681779       | 6  |
| 10 | 1005.400725 | 503.204001      | 987.390160     | 494.198718       | E    | 591.334819  | 296.171048      | 574.308270     | 287.657773       | 573.324254     | 287.165765       | 5  |
| 11 | 1118.484789 | 559.746033      | 1100.474224    | 550.740750       | I    | 462.292226  | 231.649751      | 445.265677     | 223.136477       | 444.281661     | 222.644469       | 4  |
| 12 | 1219.532468 | 610.269872      | 1201.521903    | 601.264590       | T    | 349.208162  | 175.107719      | 332.181613     | 166.594445       | 331.197597     | 166.102437       | 3  |
| 13 | 1320.580147 | 660.793712      | 1302.569582    | 651.788429       | T    | 248.160483  | 124.583879      | 231.133934     | 116.070605       | 230.149918     | 115.578597       | 2  |
| 14 |             |                 |                |                  | K    | 147.112804  | 74.060040       | 130.086255     | 65.546765        |                |                  | 1  |

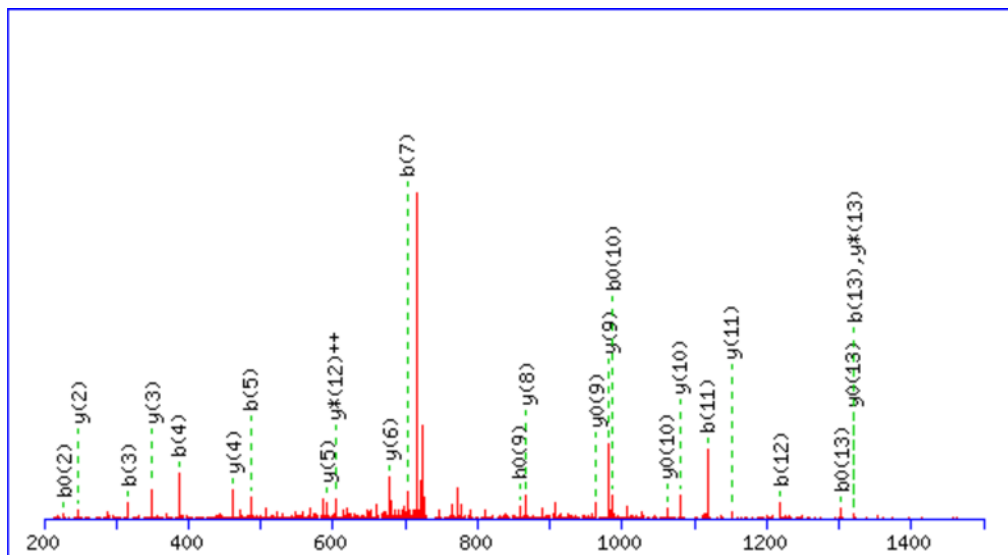

## Peptide View

MS/MS Fragmentation of **AVGLLTVISK**

Found in **IPI00013446**, Tax\_Id=9606 Gene\_Symbol=PSCA Prostate stem cell antigen

**Experiment:** 11 - S\_D-2 **Fraction:** S\_D-2

Match to Query 4276: 999.633448 from(500.824000,2+)

Title: OECHL100312\_42.17905.17905.2.dta

Data file \\Boromir\masse\Data LTQ-Orbitrap\Chrystelle Lacroix\Etude clinique sJPU\OECHL100312\_42.raw

**Monoisotopic mass of neutral peptide Mr(calc):** 999.632828 **Fixed modifications:** Carbamidomethyl (C) (apply to specified residues or termini only) **Ions Score:** 63

**Expect:** 6.1e-006 **Matches :** 14/78 fragment ions using 25 most intense peaks ([help](#))

| # | b                 | b <sup>++</sup>   | b <sup>0</sup> | b <sup>0++</sup> | Seq.     | y                 | y <sup>++</sup> | y*         | y <sup>*++</sup> | y <sup>0</sup> | y <sup>0++</sup> | #         |
|---|-------------------|-------------------|----------------|------------------|----------|-------------------|-----------------|------------|------------------|----------------|------------------|-----------|
| 1 | 72.044390         | 36.525833         |                |                  | <b>A</b> |                   |                 |            |                  |                |                  | <b>10</b> |
| 2 | <b>171.112804</b> | 86.060040         |                |                  | <b>V</b> | 929.602995        | 465.305136      | 912.576446 | 456.791861       | 911.592430     | 456.299853       | <b>9</b>  |
| 3 | <b>228.134268</b> | 114.570772        |                |                  | <b>G</b> | <b>830.534581</b> | 415.770929      | 813.508032 | 407.257654       | 812.524016     | 406.765646       | <b>8</b>  |
| 4 | <b>341.218332</b> | <b>171.112804</b> |                |                  | <b>L</b> | 773.513117        | 387.260197      | 756.486568 | 378.746922       | 755.502552     | 378.254914       | <b>7</b>  |
| 5 | <b>454.302396</b> | 227.654836        |                |                  | <b>L</b> | <b>660.429053</b> | 330.718165      | 643.402504 | 322.204890       | 642.418488     | 321.712882       | <b>6</b>  |
| 6 | <b>555.350075</b> | 278.178676        | 537.339510     | 269.173393       | <b>T</b> | <b>547.344989</b> | 274.176133      | 530.318440 | 265.662858       | 529.334424     | 265.170850       | <b>5</b>  |

|    |            |            |            |            |   |            |            |            |            |            |            |   |
|----|------------|------------|------------|------------|---|------------|------------|------------|------------|------------|------------|---|
| 7  | 654.418489 | 327.712883 | 636.407924 | 318.707600 | V | 446.297310 | 223.652293 | 429.270761 | 215.139018 | 428.286745 | 214.647010 | 4 |
| 8  | 767.502553 | 384.254915 | 749.491988 | 375.249632 | I | 347.228896 | 174.118086 | 330.202347 | 165.604811 | 329.218331 | 165.112803 | 3 |
| 9  | 854.534581 | 427.770929 | 836.524016 | 418.765646 | S | 234.144832 | 117.576054 | 217.118283 | 109.062779 | 216.134267 | 108.570771 | 2 |
| 10 |            |            |            |            | K | 147.112804 | 74.060040  | 130.086255 | 65.546765  |            |            | 1 |

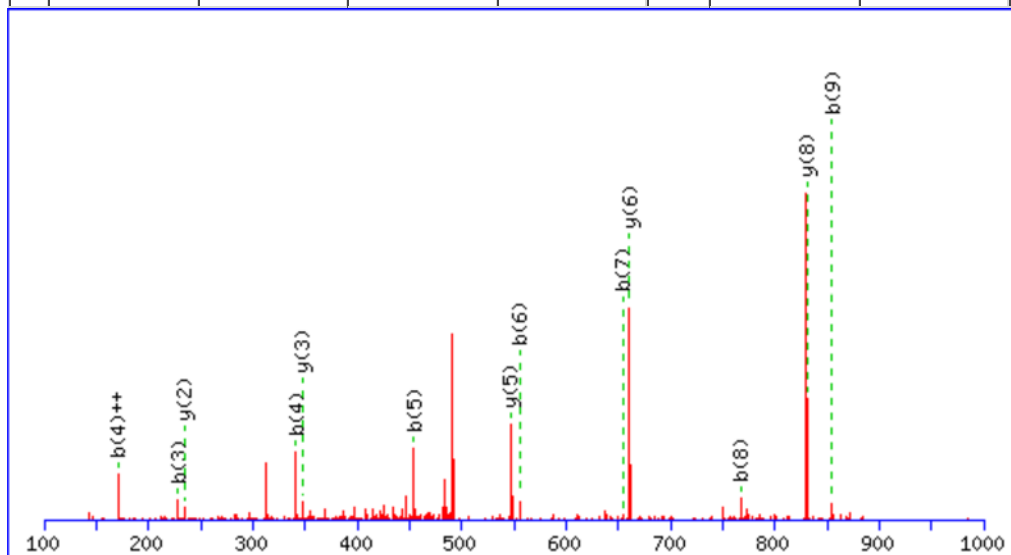

## Peptide View

MS/MS Fragmentation of **LLIYDASNLETGVPSR**

Found in **IP100003111**, Tax\_Id=9606 Gene\_Symbol=LOC652694 Ig kappa chain V-I region AU

**Experiment:** 11 - S\_D-2 **Fraction:** S\_D-2

Match to Query 14399: 1746.916448 from(874.465500,2+)

Title: OECHL100312\_42.17754.17754.2.dta

Data file \\Boromir\masse\Data LTQ-Orbitrap\Chrystelle Lacroix\Etude clinique sJPU\OECHL100312\_42.raw

**Monoisotopic mass of neutral peptide Mr(calc):** 1746.915192 **Fixed modifications:** Carbamidomethyl (C) (apply to specified residues or termini only) **Ions Score:** 70

**Expect:** 1e-005 **Matches :** 31/156 fragment ions using 60 most intense peaks ([help](#))

| # | b          | b <sup>++</sup> | b <sup>*</sup> | b <sup>***</sup> | b <sup>0</sup> | b <sup>0++</sup> | Seq. | y           | y <sup>++</sup> | y <sup>*</sup> | y <sup>***</sup> | y <sup>0</sup> | y <sup>0++</sup> | #  |
|---|------------|-----------------|----------------|------------------|----------------|------------------|------|-------------|-----------------|----------------|------------------|----------------|------------------|----|
| 1 | 114.091340 | 57.549308       |                |                  |                |                  | L    |             |                 |                |                  |                |                  | 16 |
| 2 | 227.175404 | 114.091340      |                |                  |                |                  | L    | 1634.838427 | 817.922852      | 1617.811878    | 809.409577       | 1616.827862    | 808.917569       | 15 |

|    |                    |                   |                    |            |                    |            |          |                    |            |                   |            |                    |                   |           |
|----|--------------------|-------------------|--------------------|------------|--------------------|------------|----------|--------------------|------------|-------------------|------------|--------------------|-------------------|-----------|
| 3  | <b>340.259468</b>  | 170.633372        |                    |            |                    |            | <b>I</b> | <b>1521.754363</b> | 761.380820 | 1504.727814       | 752.867545 | 1503.743798        | 752.375537        | <b>14</b> |
| 4  | <b>503.322797</b>  | 252.165036        |                    |            |                    |            | <b>Y</b> | 1408.670299        | 704.838788 | 1391.643750       | 696.325513 | <b>1390.659734</b> | <b>695.833505</b> | <b>13</b> |
| 5  | <b>618.349740</b>  | 309.678508        |                    |            | 600.339175         | 300.673226 | <b>D</b> | 1245.606970        | 623.307123 | 1228.580421       | 614.793849 | 1227.596405        | 614.301841        | <b>12</b> |
| 6  | <b>689.386854</b>  | 345.197065        |                    |            | 671.376289         | 336.191782 | <b>A</b> | <b>1130.580027</b> | 565.793652 | 1113.553478       | 557.280377 | 1112.569462        | 556.788369        | <b>11</b> |
| 7  | 776.418882         | 388.713079        |                    |            | 758.408317         | 379.707796 | <b>S</b> | <b>1059.542913</b> | 530.275095 | 1042.516364       | 521.761820 | 1041.532348        | 521.269812        | <b>10</b> |
| 8  | 890.461809         | <b>445.734542</b> | <b>873.435260</b>  | 437.221268 | 872.451244         | 436.729260 | <b>N</b> | <b>972.510885</b>  | 486.759081 | 955.484336        | 478.245806 | 954.500320         | 477.753798        | <b>9</b>  |
| 9  | <b>1003.545873</b> | 502.276574        | <b>986.519324</b>  | 493.763300 | 985.535308         | 493.271292 | <b>L</b> | <b>858.467958</b>  | 429.737617 | 841.441409        | 421.224343 | 840.457393         | 420.732335        | <b>8</b>  |
| 10 | <b>1132.588466</b> | 566.797871        | 1115.561917        | 558.284597 | 1114.577901        | 557.792588 | <b>E</b> | <b>745.383894</b>  | 373.195585 | 728.357345        | 364.682311 | 727.373329         | 364.190303        | <b>7</b>  |
| 11 | 1233.636145        | 617.321710        | 1216.609596        | 608.808436 | 1215.625580        | 608.316428 | <b>T</b> | <b>616.341301</b>  | 308.674289 | 599.314752        | 300.161014 | 598.330736         | 299.669006        | <b>6</b>  |
| 12 | <b>1290.657609</b> | 645.832442        | 1273.631060        | 637.319168 | <b>1272.647044</b> | 636.827160 | <b>G</b> | <b>515.293622</b>  | 258.150449 | 498.267073        | 249.637175 | 497.283057         | 249.145167        | <b>5</b>  |
| 13 | <b>1389.726023</b> | <b>695.366649</b> | <b>1372.699474</b> | 686.853375 | <b>1371.715458</b> | 686.361367 | <b>V</b> | <b>458.272158</b>  | 229.639717 | <b>441.245609</b> | 221.126443 | 440.261593         | 220.634435        | <b>4</b>  |
| 14 | <b>1486.778787</b> | 743.893032        | 1469.752238        | 735.379757 | 1468.768222        | 734.887749 | <b>P</b> | <b>359.203744</b>  | 180.105510 | 342.177195        | 171.592236 | <b>341.193179</b>  | 171.100228        | <b>3</b>  |
| 15 | <b>1573.810815</b> | 787.409046        | 1556.784266        | 778.895771 | 1555.800250        | 778.403763 | <b>S</b> | 262.150980         | 131.579128 | 245.124431        | 123.065854 | 244.140415         | 122.573846        | <b>2</b>  |
| 16 |                    |                   |                    |            |                    |            | <b>R</b> | 175.118952         | 88.063114  | 158.092403        | 79.549839  |                    |                   | <b>1</b>  |

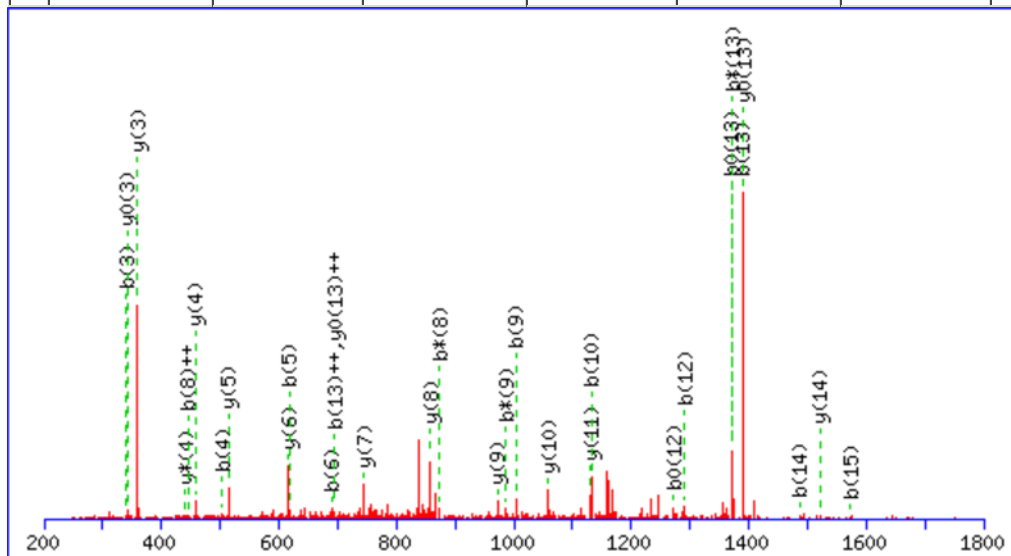

## Peptide View

MS/MS Fragmentation of **KAGPCEQAGSPCR**Found in **IPI00028381**, Tax\_Id=9606 Gene\_Symbol=DLK2 Isoform 1 of Protein delta homolog 2**Experiment:** 11 - S\_D-2 **Fraction:** S\_D-2

Match to Query 10949: 1416.625248 from(709.319900,2+)

Title: OECHL100312\_42.2294.2294.2.dta

Data file \\Boromir\masse\Data LTQ-Orbitrap\Chrystelle Lacroix\Etude clinique sJPU\OECHL100312\_42.raw

**Monoisotopic mass of neutral peptide Mr(calc):** 1416.623810 **Fixed modifications:** Carbamidomethyl (C) (apply to specified residues or termini only) **Ions Score:** 68**Expect:** 9e-006 **Matches :** 20/128 fragment ions using 37 most intense peaks ([help](#))

| #  | b           | b <sup>++</sup> | b <sup>*</sup> | b <sup>*++</sup> | b <sup>0</sup> | b <sup>0++</sup> | Seq. | y           | y <sup>++</sup> | y <sup>*</sup> | y <sup>*++</sup> | y <sup>0</sup> | y <sup>0++</sup> | #  |
|----|-------------|-----------------|----------------|------------------|----------------|------------------|------|-------------|-----------------|----------------|------------------|----------------|------------------|----|
| 1  | 129.102239  | 65.054757       | 112.075690     | 56.541483        |                |                  | K    |             |                 |                |                  |                |                  | 13 |
| 2  | 200.139353  | 100.573315      | 183.112804     | 92.060040        |                |                  | A    | 1289.536133 | 645.271705      | 1272.509584    | 636.758430       | 1271.525568    | 636.266422       | 12 |
| 3  | 257.160817  | 129.084047      | 240.134268     | 120.570772       |                |                  | G    | 1218.499019 | 609.753148      | 1201.472470    | 601.239873       | 1200.488454    | 600.747865       | 11 |
| 4  | 354.213581  | 177.610429      | 337.187032     | 169.097154       |                |                  | P    | 1161.477555 | 581.242416      | 1144.451006    | 572.729141       | 1143.466990    | 572.237133       | 10 |
| 5  | 514.244230  | 257.625753      | 497.217681     | 249.112479       |                |                  | C    | 1064.424791 | 532.716034      | 1047.398242    | 524.202759       | 1046.414226    | 523.710751       | 9  |
| 6  | 643.286823  | 322.147050      | 626.260274     | 313.633775       | 625.276258     | 313.141767       | E    | 904.394142  | 452.700709      | 887.367593     | 444.187434       | 886.383577     | 443.695427       | 8  |
| 7  | 771.345401  | 386.176339      | 754.318852     | 377.663064       | 753.334836     | 377.171056       | Q    | 775.351549  | 388.179413      | 758.325000     | 379.666138       | 757.340984     | 379.174130       | 7  |
| 8  | 842.382515  | 421.694896      | 825.355966     | 413.181621       | 824.371950     | 412.689613       | A    | 647.292971  | 324.150124      | 630.266422     | 315.636849       | 629.282406     | 315.144841       | 6  |
| 9  | 899.403979  | 450.205628      | 882.377430     | 441.692353       | 881.393414     | 441.200345       | G    | 576.255857  | 288.631567      | 559.229308     | 280.118292       | 558.245292     | 279.626284       | 5  |
| 10 | 986.436007  | 493.721642      | 969.409458     | 485.208367       | 968.425442     | 484.716359       | S    | 519.234393  | 260.120835      | 502.207844     | 251.607560       | 501.223828     | 251.115552       | 4  |
| 11 | 1083.488771 | 542.248024      | 1066.462222    | 533.734749       | 1065.478206    | 533.242741       | P    | 432.202365  | 216.604820      | 415.175816     | 208.091546       |                |                  | 3  |
| 12 | 1243.519420 | 622.263348      | 1226.492871    | 613.750074       | 1225.508855    | 613.258066       | C    | 335.149601  | 168.078438      | 318.123052     | 159.565164       |                |                  | 2  |
| 13 |             |                 |                |                  |                |                  | R    | 175.118952  | 88.063114       | 158.092403     | 79.549839        |                |                  | 1  |

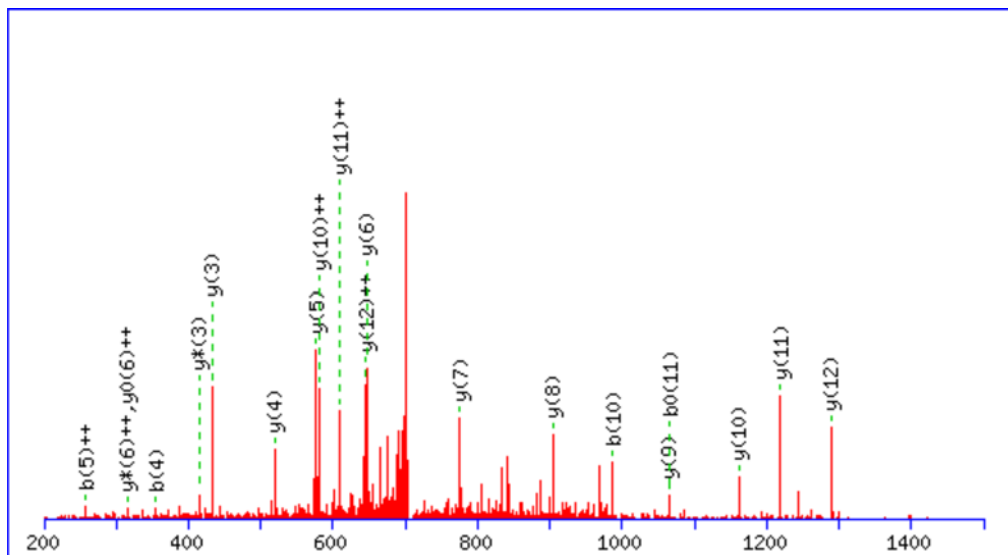

## Peptide View

MS/MS Fragmentation of **SCVACGNDIALIK**

Found in **IPI00295663**, Tax\_Id=9606 Gene\_Symbol=CELA3A Chymotrypsin-like elastase family member 3A

**Experiment:** 11 - S\_D-2 **Fraction:** S\_D-2

Match to Query 10970: 1419.685848 from(710.850200,2+)

Title: OECHL100312\_42.13479.13479.2.dta

Data file \\Boromir\masse\Data LTQ-Orbitrap\Chrystelle Lacroix\Etude clinique sJPU\OECHL100312\_42.raw

**Monoisotopic mass of neutral peptide Mr(calc):** 1419.685013 **Fixed modifications:** Carbamidomethyl (C) (apply to specified residues or termini only) **Ions Score:** 66

**Expect:** 3.6e-005 **Matches :** 18/122 fragment ions using 24 most intense peaks ([help](#))

| # | b                 | b <sup>++</sup> | b* | b <sup>*++</sup> | b <sup>0</sup> | b <sup>0++</sup> | Seq. | y                  | y <sup>++</sup>   | y*                 | y <sup>*++</sup> | y <sup>0</sup> | y <sup>0++</sup>  | #  |
|---|-------------------|-----------------|----|------------------|----------------|------------------|------|--------------------|-------------------|--------------------|------------------|----------------|-------------------|----|
| 1 | 88.039304         | 44.523290       |    |                  | 70.028739      | 35.518008        | S    |                    |                   |                    |                  |                |                   | 13 |
| 2 | <b>248.069953</b> | 124.538614      |    |                  | 230.059388     | 115.533332       | C    | 1333.660270        | 667.333773        | <b>1316.633721</b> | 658.820498       | 1315.649705    | 658.328490        | 12 |
| 3 | <b>347.138367</b> | 174.072822      |    |                  | 329.127802     | 165.067539       | V    | <b>1173.629621</b> | <b>587.318448</b> | 1156.603072        | 578.805174       | 1155.619056    | <b>578.313166</b> | 11 |
| 4 | <b>418.175481</b> | 209.591379      |    |                  | 400.164916     | 200.586096       | A    | <b>1074.561207</b> | 537.784242        | 1057.534658        | 529.270967       | 1056.550642    | 528.778959        | 10 |
| 5 | <b>578.206130</b> | 289.606703      |    |                  | 560.195565     | 280.601421       | C    | <b>1003.524093</b> | 502.265684        | 986.497544         | 493.752410       | 985.513528     | 493.260402        | 9  |
| 6 | 635.227594        | 318.117435      |    |                  | 617.217029     | 309.112153       | G    | <b>843.493444</b>  | 422.250360        | 826.466895         | 413.737085       | 825.482879     | 413.245077        | 8  |

|    |             |            |             |            |             |            |   |            |            |            |            |            |            |   |
|----|-------------|------------|-------------|------------|-------------|------------|---|------------|------------|------------|------------|------------|------------|---|
| 7  | 749.270521  | 375.138899 | 732.243972  | 366.625624 | 731.259956  | 366.133616 | N | 786.471980 | 393.739628 | 769.445431 | 385.226353 | 768.461415 | 384.734345 | 7 |
| 8  | 864.297464  | 432.652370 | 847.270915  | 424.139096 | 846.286899  | 423.647088 | D | 672.429053 | 336.718164 | 655.402504 | 328.204890 | 654.418488 | 327.712882 | 6 |
| 9  | 977.381528  | 489.194402 | 960.354979  | 480.681128 | 959.370963  | 480.189120 | I | 557.402110 | 279.204693 | 540.375561 | 270.691418 |            |            | 5 |
| 10 | 1048.418642 | 524.712959 | 1031.392093 | 516.199685 | 1030.408077 | 515.707677 | A | 444.318046 | 222.662661 | 427.291497 | 214.149386 |            |            | 4 |
| 11 | 1161.502706 | 581.254991 | 1144.476157 | 572.741717 | 1143.492141 | 572.249709 | L | 373.280932 | 187.144104 | 356.254383 | 178.630829 |            |            | 3 |
| 12 | 1274.586770 | 637.797023 | 1257.560221 | 629.283749 | 1256.576205 | 628.791740 | I | 260.196868 | 130.602072 | 243.170319 | 122.088797 |            |            | 2 |
| 13 |             |            |             |            |             |            | K | 147.112804 | 74.060040  | 130.086255 | 65.546765  |            |            | 1 |

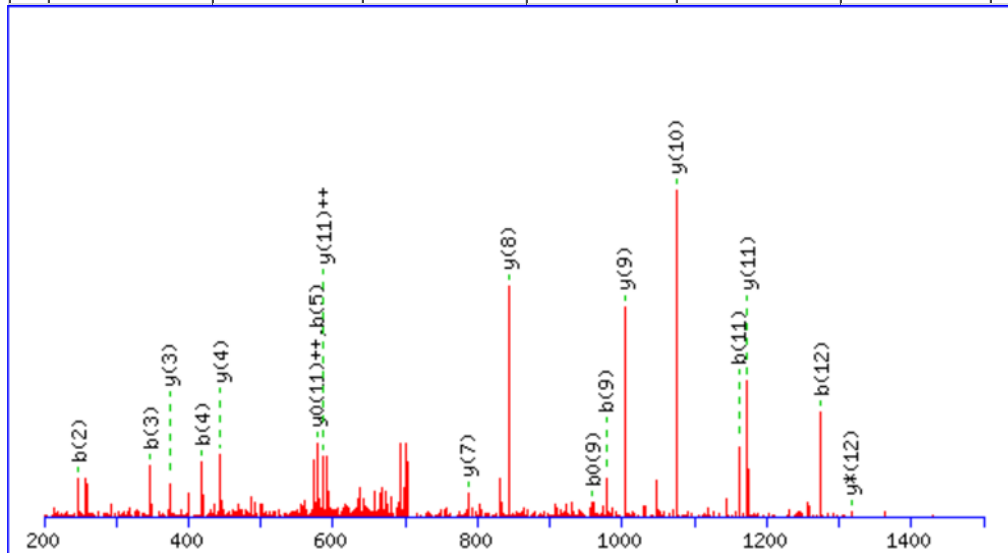

## Peptide View

MS/MS Fragmentation of **AADDTWEPFASGK**

Found in **IPI00022432**, Tax\_Id=9606 Gene\_Symbol=TTR Transthyretin

Experiment: 11 - S\_D-2 Fraction: S\_D-2

Match to Query 10704: 1393.614248 from(697.814400,2+)

Title: OECHL100312\_42.15702.15702.2.dta

Data file \\Boromir\masse\Data LTQ-Orbitrap\Chrystelle Lacroix\Etude clinique sJPU\OECHL100312\_42.raw

**Monoisotopic mass of neutral peptide Mr(calc):** 1393.615005**Fixed modifications:** Carbamidomethyl (C) (apply to specified residues or termini only)**Ions Score:** 62

**Expect:** 3.5e-005**Matches :** 16/112 fragment ions using 24 most intense peaks ([help](#))



| #  | <b>b</b>           | <b>b<sup>++</sup></b> | <b>b<sup>0</sup></b> | <b>b<sup>0++</sup></b> | Seq.     | <b>y</b>           | <b>y<sup>++</sup></b> | <b>y<sup>*</sup></b> | <b>y<sup>*++</sup></b> | <b>y<sup>0</sup></b> | <b>y<sup>0++</sup></b> | #         |
|----|--------------------|-----------------------|----------------------|------------------------|----------|--------------------|-----------------------|----------------------|------------------------|----------------------|------------------------|-----------|
| 1  | 72.044390          | 36.525833             |                      |                        | <b>A</b> |                    |                       |                      |                        |                      |                        | <b>13</b> |
| 2  | 143.081504         | 72.044390             |                      |                        | <b>A</b> | 1323.585173        | 662.296225            | 1306.558624          | 653.782950             | 1305.574608          | 653.290942             | <b>12</b> |
| 3  | <b>258.108447</b>  | 129.557862            | 240.097882           | 120.552579             | <b>D</b> | <b>1252.548059</b> | 626.777668            | 1235.521510          | 618.264393             | 1234.537494          | 617.772385             | <b>11</b> |
| 4  | <b>373.135390</b>  | 187.071333            | 355.124825           | 178.066051             | <b>D</b> | <b>1137.521116</b> | 569.264196            | 1120.494567          | 560.750922             | 1119.510551          | 560.258914             | <b>10</b> |
| 5  | <b>474.183069</b>  | 237.595173            | <b>456.172504</b>    | 228.589890             | <b>T</b> | <b>1022.494173</b> | 511.750725            | 1005.467624          | 503.237450             | 1004.483608          | 502.745442             | <b>9</b>  |
| 6  | <b>660.262382</b>  | 330.634829            | 642.251817           | 321.629547             | <b>W</b> | <b>921.446494</b>  | 461.226885            | 904.419945           | 452.713611             | 903.435929           | 452.221603             | <b>8</b>  |
| 7  | <b>789.304975</b>  | 395.156126            | 771.294410           | 386.150843             | <b>E</b> | <b>735.367181</b>  | 368.187229            | 718.340632           | 359.673954             | 717.356616           | 359.181946             | <b>7</b>  |
| 8  | 886.357739         | 443.682508            | 868.347174           | 434.677225             | <b>P</b> | <b>606.324588</b>  | 303.665932            | 589.298039           | 295.152658             | 588.314023           | 294.660650             | <b>6</b>  |
| 9  | 1033.426153        | 517.216715            | 1015.415588          | 508.211432             | <b>F</b> | 509.271824         | 255.139550            | 492.245275           | 246.626275             | 491.261259           | 246.134267             | <b>5</b>  |
| 10 | <b>1104.463267</b> | 552.735272            | 1086.452702          | 543.729989             | <b>A</b> | 362.203410         | 181.605343            | 345.176861           | 173.092068             | 344.192845           | 172.600060             | <b>4</b>  |
| 11 | <b>1191.495295</b> | 596.251286            | 1173.484730          | 587.246003             | <b>S</b> | <b>291.166296</b>  | 146.086786            | 274.139747           | 137.573512             | 273.155731           | 137.081504             | <b>3</b>  |
| 12 | 1248.516759        | 624.762018            | 1230.506194          | 615.756735             | <b>G</b> | <b>204.134268</b>  | 102.570772            | 187.107719           | 94.057497              |                      |                        | <b>2</b>  |
| 13 |                    |                       |                      |                        | <b>K</b> | 147.112804         | 74.060040             | 130.086255           | 65.546765              |                      |                        | <b>1</b>  |

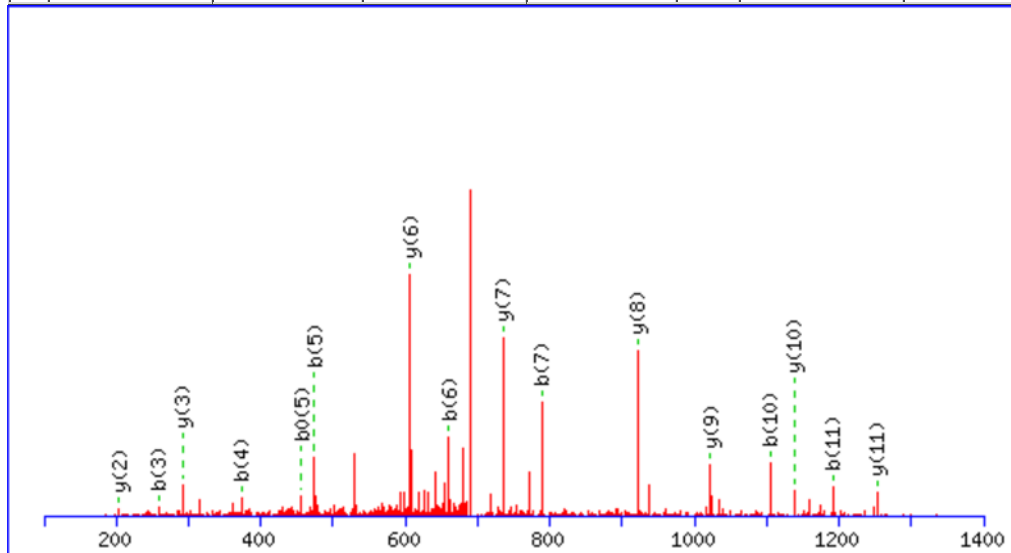

## Peptide View

MS/MS Fragmentation of **SYELTQPPSVSVSPGQTAR**Found in **IPI00382440**, Tax\_Id=9606 Gene\_Symbol=- Ig lambda chain V-IV region Hil**Experiment:** 56 - PyD-2 **Fraction:** PyD-2

Match to Query 15372: 2002.997448 from(1002.506000,2+)

Title: OECHL100312\_40.13555.13555.2.dta

Data file \\Boromir\masse\Data LTQ-Orbitrap\Chrystelle Lacroix\Etude clinique sJPU\OECHL100312\_40.raw

**Monoisotopic mass of neutral peptide Mr(calc):** 2002.995987**Fixed modifications:** Carbamidomethyl (C) (apply to specified residues or termini only)**Ions Score:** 70**Expect:** 1.9e-005**Matches :** 28/202 fragment ions using 33 most intense peaks ([help](#))

| #  | b           | b <sup>++</sup> | b <sup>*</sup> | b <sup>*++</sup> | b <sup>0</sup> | b <sup>0++</sup> | Seq. | y           | y <sup>++</sup> | y <sup>*</sup> | y <sup>*++</sup> | y <sup>0</sup> | y <sup>0++</sup> | #  |
|----|-------------|-----------------|----------------|------------------|----------------|------------------|------|-------------|-----------------|----------------|------------------|----------------|------------------|----|
| 1  | 88.039304   | 44.523290       |                |                  | 70.028739      | 35.518008        | S    |             |                 |                |                  |                |                  | 19 |
| 2  | 251.102633  | 126.054954      |                |                  | 233.092068     | 117.049672       | Y    | 1916.971234 | 958.989255      | 1899.944685    | 950.475981       | 1898.960669    | 949.983973       | 18 |
| 3  | 380.145226  | 190.576251      |                |                  | 362.134661     | 181.570969       | E    | 1753.907905 | 877.457591      | 1736.881356    | 868.944316       | 1735.897340    | 868.452308       | 17 |
| 4  | 493.229290  | 247.118283      |                |                  | 475.218725     | 238.113001       | L    | 1624.865312 | 812.936294      | 1607.838763    | 804.423020       | 1606.854747    | 803.931012       | 16 |
| 5  | 594.276969  | 297.642123      |                |                  | 576.266404     | 288.636840       | T    | 1511.781248 | 756.394262      | 1494.754699    | 747.880988       | 1493.770683    | 747.388980       | 15 |
| 6  | 722.335547  | 361.671412      | 705.308998     | 353.158137       | 704.324982     | 352.666129       | Q    | 1410.733569 | 705.870423      | 1393.707020    | 697.357148       | 1392.723004    | 696.865140       | 14 |
| 7  | 819.388311  | 410.197794      | 802.361762     | 401.684519       | 801.377746     | 401.192511       | P    | 1282.674991 | 641.841134      | 1265.648442    | 633.327859       | 1264.664426    | 632.835851       | 13 |
| 8  | 916.441075  | 458.724176      | 899.414526     | 450.210901       | 898.430510     | 449.718893       | P    | 1185.622227 | 593.314752      | 1168.595678    | 584.801477       | 1167.611662    | 584.309469       | 12 |
| 9  | 1003.473103 | 502.240190      | 986.446554     | 493.726915       | 985.462538     | 493.234907       | S    | 1088.569463 | 544.788370      | 1071.542914    | 536.275095       | 1070.558898    | 535.783087       | 11 |
| 10 | 1102.541517 | 551.774397      | 1085.514968    | 543.261122       | 1084.530952    | 542.769114       | V    | 1001.537435 | 501.272356      | 984.510886     | 492.759081       | 983.526870     | 492.267073       | 10 |
| 11 | 1189.573545 | 595.290411      | 1172.546996    | 586.777136       | 1171.562980    | 586.285128       | S    | 902.469021  | 451.738149      | 885.442472     | 443.224874       | 884.458456     | 442.732866       | 9  |
| 12 | 1288.641959 | 644.824618      | 1271.615410    | 636.311343       | 1270.631394    | 635.819335       | V    | 815.436993  | 408.222135      | 798.410444     | 399.708860       | 797.426428     | 399.216852       | 8  |
| 13 | 1375.673987 | 688.340632      | 1358.647438    | 679.827357       | 1357.663422    | 679.335349       | S    | 716.368579  | 358.687928      | 699.342030     | 350.174653       | 698.358014     | 349.682645       | 7  |
| 14 | 1472.726751 | 736.867014      | 1455.700202    | 728.353739       | 1454.716186    | 727.861731       | P    | 629.336551  | 315.171914      | 612.310002     | 306.658639       | 611.325986     | 306.166631       | 6  |
| 15 | 1529.748215 | 765.377746      | 1512.721666    | 756.864471       | 1511.737650    | 756.372463       | G    | 532.283787  | 266.645532      | 515.257238     | 258.132257       | 514.273222     | 257.640249       | 5  |
| 16 | 1657.806793 | 829.407035      | 1640.780244    | 820.893760       | 1639.796228    | 820.401752       | Q    | 475.262323  | 238.134800      | 458.235774     | 229.621525       | 457.251758     | 229.129517       | 4  |
| 17 | 1758.854472 | 879.930874      | 1741.827923    | 871.417600       | 1740.843907    | 870.925592       | T    | 347.203745  | 174.105510      | 330.177196     | 165.592236       | 329.193180     | 165.100228       | 3  |
| 18 | 1829.891586 | 915.449431      | 1812.865037    | 906.936157       | 1811.881021    | 906.444149       | A    | 246.156066  | 123.581671      | 229.129517     | 115.068396       |                |                  | 2  |
| 19 |             |                 |                |                  |                |                  | R    | 175.118952  | 88.063114       | 158.092403     | 79.549839        |                |                  | 1  |

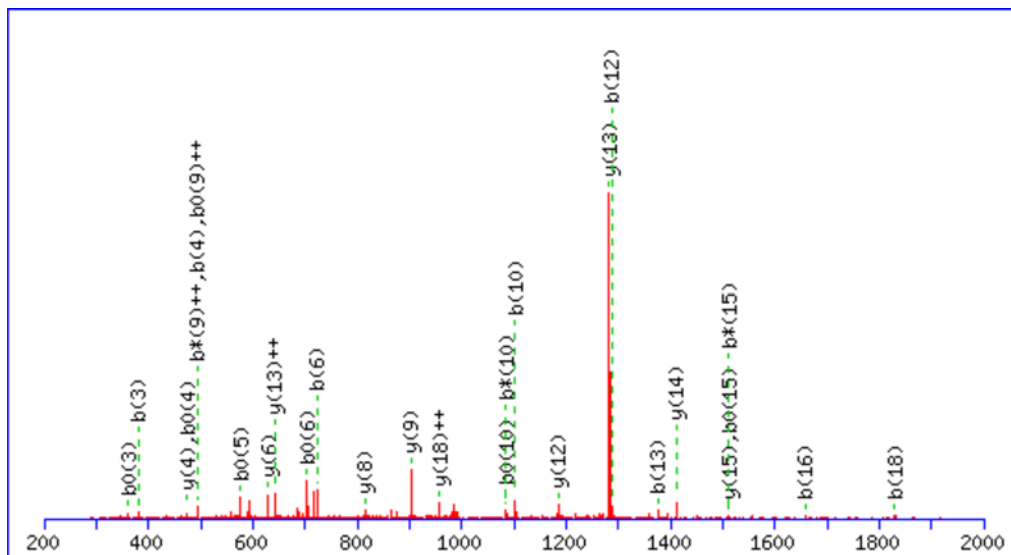

## Peptide View

MS/MS Fragmentation of **LLIYDASNLETGVPSR**

Found in **IP100003111**, Tax\_Id=9606 Gene\_Symbol=LOC652694 Ig kappa chain V-I region AU

**Experiment:** 56 - PyD-2 **Fraction:** PyD-2

Match to Query 13450: 1746.919848 from(874.467200,2+)

Title: OECHL100312\_40.17406.17406.2.dta

Data file \\Boromir\masse\Data LTQ-Orbitrap\Chrystelle Lacroix\Etude clinique sJPU\OECHL100312\_40.raw

**Monoisotopic mass of neutral peptide Mr(calc):** 1746.915192 **Fixed modifications:** Carbamidomethyl (C) (apply to specified residues or termini only) **Ions Score:** 80

**Expect:** 1.2e-006 **Matches :** 27/156 fragment ions using 42 most intense peaks ([help](#))

| # | b                 | b <sup>++</sup> | b <sup>*</sup> | b <sup>*++</sup> | b <sup>0</sup> | b <sup>0++</sup> | Seq. | y                  | y <sup>++</sup>   | y <sup>*</sup> | y <sup>*++</sup> | y <sup>0</sup>     | y <sup>0++</sup> | #  |
|---|-------------------|-----------------|----------------|------------------|----------------|------------------|------|--------------------|-------------------|----------------|------------------|--------------------|------------------|----|
| 1 | 114.091340        | 57.549308       |                |                  |                |                  | L    |                    |                   |                |                  |                    |                  | 16 |
| 2 | 227.175404        | 114.091340      |                |                  |                |                  | L    | 1634.838427        | 817.922852        | 1617.811878    | 809.409577       | 1616.827862        | 808.917569       | 15 |
| 3 | 340.259468        | 170.633372      |                |                  |                |                  | I    | <b>1521.754363</b> | <b>761.380820</b> | 1504.727814    | 752.867545       | <b>1503.743798</b> | 752.375537       | 14 |
| 4 | 503.322797        | 252.165036      |                |                  |                |                  | Y    | 1408.670299        | 704.838788        | 1391.643750    | 696.325513       | <b>1390.659734</b> | 695.833505       | 13 |
| 5 | <b>618.349740</b> | 309.678508      |                |                  | 600.339175     | 300.673226       | D    | <b>1245.606970</b> | 623.307123        | 1228.580421    | 614.793849       | 1227.596405        | 614.301841       | 12 |
| 6 | <b>689.386854</b> | 345.197065      |                |                  | 671.376289     | 336.191782       | A    | <b>1130.580027</b> | 565.793652        | 1113.553478    | 557.280377       | 1112.569462        | 556.788369       | 11 |

|    |             |            |             |            |             |            |   |             |            |             |            |             |            |    |
|----|-------------|------------|-------------|------------|-------------|------------|---|-------------|------------|-------------|------------|-------------|------------|----|
| 7  | 776.418882  | 388.713079 |             |            | 758.408317  | 379.707796 | S | 1059.542913 | 530.275095 | 1042.516364 | 521.761820 | 1041.532348 | 521.269812 | 10 |
| 8  | 890.461809  | 445.734542 | 873.435260  | 437.221268 | 872.451244  | 436.729260 | N | 972.510885  | 486.759081 | 955.484336  | 478.245806 | 954.500320  | 477.753798 | 9  |
| 9  | 1003.545873 | 502.276574 | 986.519324  | 493.763300 | 985.535308  | 493.271292 | L | 858.467958  | 429.737617 | 841.441409  | 421.224343 | 840.457393  | 420.732335 | 8  |
| 10 | 1132.588466 | 566.797871 | 1115.561917 | 558.284597 | 1114.577901 | 557.792588 | E | 745.383894  | 373.195585 | 728.357345  | 364.682311 | 727.373329  | 364.190303 | 7  |
| 11 | 1233.636145 | 617.321710 | 1216.609596 | 608.808436 | 1215.625580 | 608.316428 | T | 616.341301  | 308.674289 | 599.314752  | 300.161014 | 598.330736  | 299.669006 | 6  |
| 12 | 1290.657609 | 645.832442 | 1273.631060 | 637.319168 | 1272.647044 | 636.827160 | G | 515.293622  | 258.150449 | 498.267073  | 249.637175 | 497.283057  | 249.145167 | 5  |
| 13 | 1389.726023 | 695.366649 | 1372.699474 | 686.853375 | 1371.715458 | 686.361367 | V | 458.272158  | 229.639717 | 441.245609  | 221.126443 | 440.261593  | 220.634435 | 4  |
| 14 | 1486.778787 | 743.893032 | 1469.752238 | 735.379757 | 1468.768222 | 734.887749 | P | 359.203744  | 180.105510 | 342.177195  | 171.592236 | 341.193179  | 171.100228 | 3  |
| 15 | 1573.810815 | 787.409046 | 1556.784266 | 778.895771 | 1555.800250 | 778.403763 | S | 262.150980  | 131.579128 | 245.124431  | 123.065854 | 244.140415  | 122.573846 | 2  |
| 16 |             |            |             |            |             |            | R | 175.118952  | 88.063114  | 158.092403  | 79.549839  |             |            | 1  |

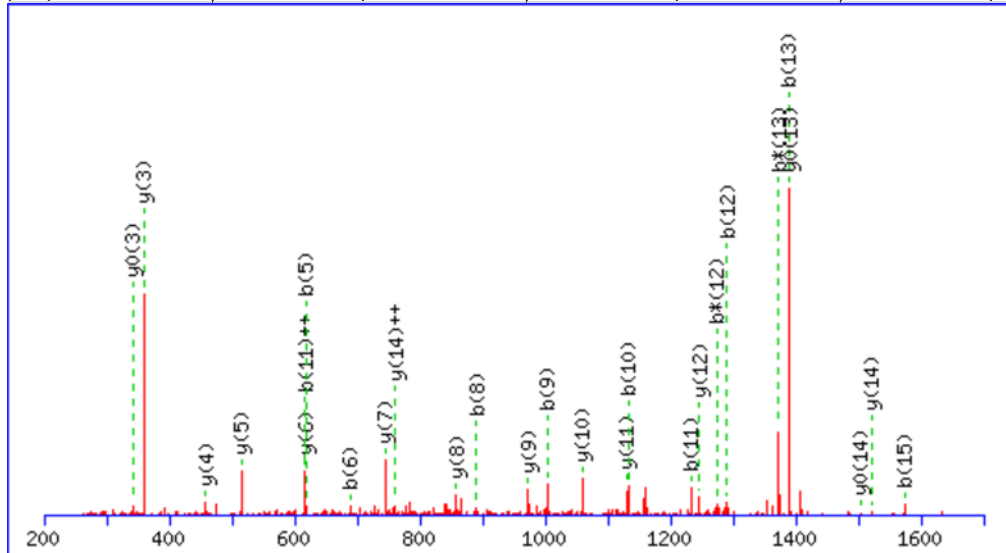

## Peptide View

MS/MS Fragmentation of **AIYKGGSEAGP**

Found in **IP100011284**, Tax\_Id=9606 Gene\_Symbol=COMT Isoform Membrane-bound of Catechol O-methyltransferase

Experiment: 56 - PyD-2 Fraction: PyD-2

Match to Query 6285: 1145.574248 from(573.794400,2+)

Title: OECHL100312\_40.7986.7986.2.dta

Data file \\Boromir\masse\Data LTQ-Orbitrap\Chrystelle Lacroix\Etude clinique sJPU\OECHL100312\_40.raw

**Monoisotopic mass of neutral peptide Mr(calc):** 1145.571671**Fixed modifications:** Carbamidomethyl (C) (apply to specified residues or termini only)**Ions Score:** 53**Expect:** 0.00062**Matches :** 14/90 fragment ions using 20 most intense peaks ([help](#))

| #  | b                  | b <sup>++</sup> | b*                | b <sup>*++</sup> | b <sup>0</sup> | b <sup>0++</sup> | Seq. | y                 | y <sup>++</sup>   | y*          | y <sup>*++</sup> | y <sup>0</sup> | y <sup>0++</sup> | #  |
|----|--------------------|-----------------|-------------------|------------------|----------------|------------------|------|-------------------|-------------------|-------------|------------------|----------------|------------------|----|
| 1  | 72.044390          | 36.525833       |                   |                  |                |                  | A    |                   |                   |             |                  |                |                  | 12 |
| 2  | 185.128454         | 93.067865       |                   |                  |                |                  | I    | 1075.541852       | 538.274564        | 1058.515303 | 529.761290       | 1057.531287    | 529.269282       | 11 |
| 3  | <b>348.191783</b>  | 174.599529      |                   |                  |                |                  | Y    | <b>962.457788</b> | <b>481.732532</b> | 945.431239  | 473.219258       | 944.447223     | 472.727250       | 10 |
| 4  | 476.286746         | 238.647011      | <b>459.260197</b> | 230.133737       |                |                  | K    | <b>799.394459</b> | 400.200868        | 782.367910  | 391.687593       | 781.383894     | 391.195585       | 9  |
| 5  | 533.308210         | 267.157743      | 516.281661        | 258.644469       |                |                  | G    | <b>671.299496</b> | 336.153386        |             |                  | 653.288931     | 327.148104       | 8  |
| 6  | 630.360974         | 315.684125      | 613.334425        | 307.170851       |                |                  | P    | <b>614.278032</b> | 307.642654        |             |                  | 596.267467     | 298.637372       | 7  |
| 7  | 687.382438         | 344.194857      | 670.355889        | 335.681583       |                |                  | G    | 517.225268        | 259.116272        |             |                  | 499.214703     | 250.110990       | 6  |
| 8  | <b>774.414466</b>  | 387.710871      | 757.387917        | 379.197597       | 756.403901     | 378.705589       | S    | 460.203804        | 230.605540        |             |                  | 442.193239     | 221.600257       | 5  |
| 9  | <b>903.457059</b>  | 452.232168      | 886.430510        | 443.718893       | 885.446494     | 443.226885       | E    | <b>373.171776</b> | 187.089526        |             |                  | 355.161211     | 178.084243       | 4  |
| 10 | <b>974.494173</b>  | 487.750725      | 957.467624        | 479.237450       | 956.483608     | 478.745442       | A    | <b>244.129183</b> | 122.568229        |             |                  |                |                  | 3  |
| 11 | <b>1031.515637</b> | 516.261457      | 1014.489088       | 507.748182       | 1013.505072    | 507.256174       | G    | <b>173.092069</b> | 87.049672         |             |                  |                |                  | 2  |
| 12 |                    |                 |                   |                  |                |                  | P    | 116.070605        | 58.538941         |             |                  |                |                  | 1  |

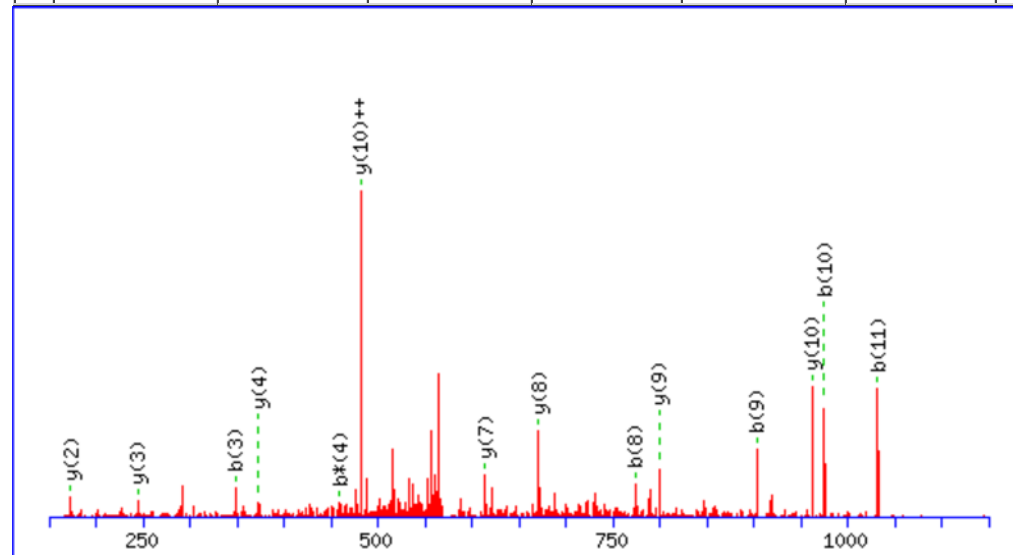

## Peptide View

MS/MS Fragmentation of **SRCPDGSTCCELPSGK**

Found in **IPI00182138**, Tax\_Id=9606 Gene\_Symbol=GRN Isoform 2 of Granulins

**Experiment:** 56 - PyD-2 **Fraction:** PyD-2

Match to Query 13888: 1809.745248 from(905.879900,2+)

Title: OECHL100312\_40.4749.4749.2.dta

Data file \\Boromir\masse\Data LTQ-Orbitrap\Chrystelle Lacroix\Etude clinique sJPU\OECHL100312\_40.raw

**Monoisotopic mass of neutral peptide Mr(calc):** 1809.744415 **Fixed modifications:** Carbamidomethyl (C) (apply to specified residues or termini only) **Ions Score:** 77

**Expect:** 5.3e-007 **Matches :** 47/174 fragment ions using 76 most intense peaks ([help](#))

| #  | b                  | b <sup>++</sup>   | b*                 | b <sup>*++</sup>  | b <sup>0</sup>    | b <sup>0++</sup>  | Seq. | y                  | y <sup>++</sup>   | y*                 | y <sup>*++</sup> | y <sup>0</sup>     | y <sup>0++</sup> | #  |
|----|--------------------|-------------------|--------------------|-------------------|-------------------|-------------------|------|--------------------|-------------------|--------------------|------------------|--------------------|------------------|----|
| 1  | 88.039304          | 44.523290         |                    |                   | 70.028739         | 35.518008         | S    |                    |                   |                    |                  |                    |                  | 16 |
| 2  | 244.140415         | 122.573845        | 227.113866         | 114.060571        | 226.129850        | 113.568563        | R    | 1723.719653        | 862.363465        | 1706.693104        | 853.850190       | 1705.709088        | 853.358182       | 15 |
| 3  | <b>404.171064</b>  | 202.589170        | 387.144515         | 194.075896        | 386.160499        | 193.583888        | C    | <b>1567.618542</b> | 784.312909        | <b>1550.591993</b> | 775.799635       | <b>1549.607977</b> | 775.307627       | 14 |
| 4  | <b>501.223828</b>  | 251.115552        | 484.197279         | 242.602277        | <b>483.213263</b> | 242.110269        | P    | <b>1407.587893</b> | 704.297585        | 1390.561344        | 695.784310       | 1389.577328        | 695.292302       | 13 |
| 5  | <b>616.250771</b>  | 308.629024        | 599.224222         | 300.115749        | 598.240206        | 299.623741        | D    | <b>1310.535129</b> | <b>655.771203</b> | 1293.508580        | 647.257928       | 1292.524564        | 646.765920       | 12 |
| 6  | <b>673.272235</b>  | 337.139756        | <b>656.245686</b>  | 328.626481        | 655.261670        | 328.134473        | G    | <b>1195.508186</b> | 598.257731        | 1178.481637        | 589.744457       | <b>1177.497621</b> | 589.252449       | 11 |
| 7  | <b>760.304263</b>  | 380.655770        | 743.277714         | 372.142495        | <b>742.293698</b> | <b>371.650487</b> | S    | <b>1138.486722</b> | 569.746999        | 1121.460173        | 561.233725       | 1120.476157        | 560.741717       | 10 |
| 8  | <b>861.351942</b>  | 431.179609        | 844.325393         | 422.666335        | 843.341377        | 422.174327        | T    | <b>1051.454694</b> | 526.230985        | 1034.428145        | 517.717711       | 1033.444129        | 517.225703       | 9  |
| 9  | <b>1021.382591</b> | 511.194934        | 1004.356042        | <b>502.681659</b> | 1003.372026       | <b>502.189651</b> | C    | 950.407015         | 475.707146        | 933.380466         | 467.193871       | 932.396450         | 466.701863       | 8  |
| 10 | <b>1181.413240</b> | 591.210258        | 1164.386691        | 582.696984        | 1163.402675       | 582.204976        | C    | <b>790.376366</b>  | 395.691821        | 773.349817         | 387.178547       | 772.365801         | 386.686539       | 7  |
| 11 | <b>1310.455833</b> | <b>655.731555</b> | 1293.429284        | 647.218280        | 1292.445268       | 646.726272        | E    | <b>630.345717</b>  | 315.676497        | 613.319168         | 307.163222       | 612.335152         | 306.671214       | 6  |
| 12 | <b>1423.539897</b> | <b>712.273587</b> | 1406.513348        | <b>703.760312</b> | 1405.529332       | <b>703.268304</b> | L    | <b>501.303124</b>  | 251.155200        | 484.276575         | 242.641925       | <b>483.292559</b>  | 242.149917       | 5  |
| 13 | <b>1520.592661</b> | <b>760.799969</b> | 1503.566112        | 752.286694        | 1502.582096       | 751.794686        | P    | <b>388.219060</b>  | 194.613168        | <b>371.192511</b>  | 186.099894       | <b>370.208495</b>  | 185.607886       | 4  |
| 14 | <b>1607.624689</b> | 804.315983        | <b>1590.598140</b> | <b>795.802708</b> | 1589.614124       | <b>795.310700</b> | S    | <b>291.166296</b>  | 146.086786        | 274.139747         | 137.573512       | 273.155731         | 137.081504       | 3  |
| 15 | <b>1664.646153</b> | 832.826715        | 1647.619604        | <b>824.313440</b> | 1646.635588       | <b>823.821432</b> | G    | 204.134268         | 102.570772        | 187.107719         | 94.057497        |                    |                  | 2  |
| 16 |                    |                   |                    |                   |                   |                   | K    | 147.112804         | 74.060040         | 130.086255         | 65.546765        |                    |                  | 1  |

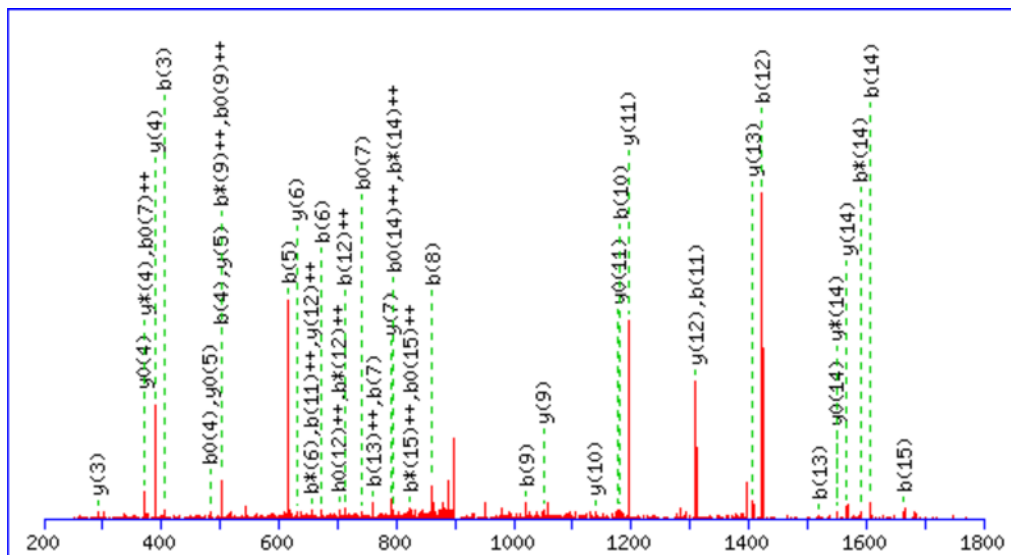

## Peptide View

MS/MS Fragmentation of **LFGGNFAHQASVAR**

Found in **IPI00298237**, Tax\_Id=9606 Gene\_Symbol=TPP1 cDNA FLJ56402, highly similar to Tripeptidyl-peptidase 1

**Experiment:** 56 - PyD-2 **Fraction:** PyD-2

Match to Query 10367: 1473.747248 from(737.880900,2+)

Title: OECHL100312\_40.12205.12205.2.dta

Data file \\Boromir\masse\Data LTQ-Orbitrap\Chrystelle Lacroix\Etude clinique sJPU\OECHL100312\_40.raw

**Monoisotopic mass of neutral peptide Mr(calc):** 1473.747696 **Fixed modifications:** Carbamidomethyl (C) (apply to specified residues or termini only) **Ions Score:** 91

**Expect:** 9.4e-008 **Matches :** 24/122 fragment ions using 36 most intense peaks ([help](#))

| # | b          | b <sup>++</sup> | b <sup>*</sup>    | b <sup>*++</sup> | b <sup>0</sup> | b <sup>0++</sup> | Seq. | y                  | y <sup>++</sup>   | y <sup>*</sup> | y <sup>*++</sup>  | y <sup>0</sup> | y <sup>0++</sup>  | #  |
|---|------------|-----------------|-------------------|------------------|----------------|------------------|------|--------------------|-------------------|----------------|-------------------|----------------|-------------------|----|
| 1 | 114.091340 | 57.549308       |                   |                  |                |                  | L    |                    |                   |                |                   |                |                   | 14 |
| 2 | 261.159754 | 131.083515      |                   |                  |                |                  | F    | <b>1361.670909</b> | <b>681.339093</b> | 1344.644360    | 672.825818        | 1343.660344    | 672.333810        | 13 |
| 3 | 318.181218 | 159.594247      |                   |                  |                |                  | G    | <b>1214.602495</b> | <b>607.804886</b> | 1197.575946    | <b>599.291611</b> | 1196.591930    | <b>598.799603</b> | 12 |
| 4 | 375.202682 | 188.104979      |                   |                  |                |                  | G    | 1157.581031        | 579.294154        | 1140.554482    | 570.780879        | 1139.570466    | 570.288871        | 11 |
| 5 | 489.245609 | 245.126442      | <b>472.219060</b> | 236.613168       |                |                  | N    | <b>1100.559567</b> | 550.783422        | 1083.533018    | 542.270147        | 1082.549002    | 541.778139        | 10 |
| 6 | 636.314023 | 318.660650      | 619.287474        | 310.147375       |                |                  | F    | <b>986.516640</b>  | 493.761958        | 969.490091     | 485.248684        | 968.506075     | 484.756676        | 9  |

|    |             |            |             |            |             |            |   |            |            |            |            |            |            |   |
|----|-------------|------------|-------------|------------|-------------|------------|---|------------|------------|------------|------------|------------|------------|---|
| 7  | 707.351137  | 354.179207 | 690.324588  | 345.665932 |             |            | A | 839.448226 | 420.227751 | 822.421677 | 411.714477 | 821.437661 | 411.222469 | 8 |
| 8  | 844.410049  | 422.708663 | 827.383500  | 414.195388 |             |            | H | 768.411112 | 384.709194 | 751.384563 | 376.195920 | 750.400547 | 375.703912 | 7 |
| 9  | 972.468627  | 486.737952 | 955.442078  | 478.224677 |             |            | Q | 631.352200 | 316.179738 | 614.325651 | 307.666464 | 613.341635 | 307.174456 | 6 |
| 10 | 1043.505741 | 522.256509 | 1026.479192 | 513.743234 |             |            | A | 503.293622 | 252.150449 | 486.267073 | 243.637175 | 485.283057 | 243.145167 | 5 |
| 11 | 1130.537769 | 565.772523 | 1113.511220 | 557.259248 | 1112.527204 | 556.767240 | S | 432.256508 | 216.631892 | 415.229959 | 208.118618 | 414.245943 | 207.626610 | 4 |
| 12 | 1229.606183 | 615.306730 | 1212.579634 | 606.793455 | 1211.595618 | 606.301447 | V | 345.224480 | 173.115878 | 328.197931 | 164.602603 |            |            | 3 |
| 13 | 1300.643297 | 650.825287 | 1283.616748 | 642.312012 | 1282.632732 | 641.820004 | A | 246.156066 | 123.581671 | 229.129517 | 115.068396 |            |            | 2 |
| 14 |             |            |             |            |             |            | R | 175.118952 | 88.063114  | 158.092403 | 79.549839  |            |            | 1 |

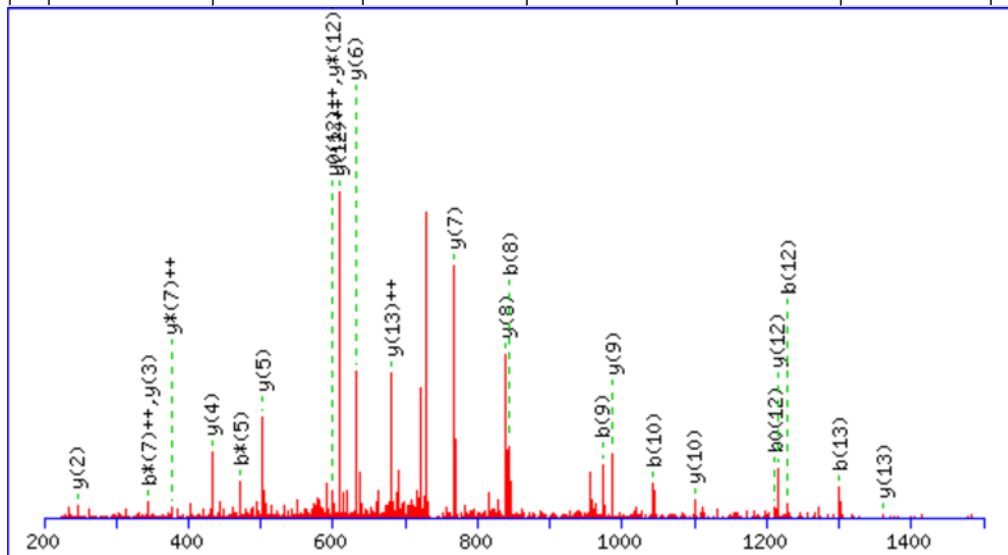

## Peptide View

MS/MS Fragmentation of **KGESGQSWPR**

Found in **IPI00015029**, Tax\_Id=9606 Gene\_Symbol=PTGES3 Prostaglandin E synthase 3

Experiment: 56 - PyD-2 Fraction: PyD-2

Match to Query 6064: 1130.545048 from(566.279800,2+)

Title: OECHL100312\_40.4156.4156.2.dta

Data file \\Boromir\masse\Data LTQ-Orbitrap\Chrystelle Lacroix\Etude clinique sJPU\OECHL100312\_40.raw

**Monoisotopic mass of neutral peptide Mr(calc): 1130.546860** Fixed modifications: Carbamidomethyl (C) (apply to specified residues or termini only) **Ions Score: 83**



**Expect:** 5.2e-007**Matches :** 20/98 fragment ions using 27 most intense peaks ([help](#))

| #  | b                 | b <sup>++</sup> | b*         | b <sup>*++</sup> | b <sup>0</sup>    | b <sup>0++</sup> | Seq. | y                  | y <sup>++</sup> | y*                | y <sup>*++</sup> | y <sup>0</sup>    | y <sup>0++</sup> | #  |
|----|-------------------|-----------------|------------|------------------|-------------------|------------------|------|--------------------|-----------------|-------------------|------------------|-------------------|------------------|----|
| 1  | 129.102239        | 65.054757       | 112.075690 | 56.541483        |                   |                  | K    |                    |                 |                   |                  |                   |                  | 10 |
| 2  | <b>186.123703</b> | 93.565489       | 169.097154 | 85.052215        |                   |                  | G    | <b>1003.459184</b> | 502.233230      | <b>986.432635</b> | 493.719956       | 985.448619        | 493.227948       | 9  |
| 3  | <b>315.166296</b> | 158.086786      | 298.139747 | 149.573512       | <b>297.155731</b> | 149.081504       | E    | <b>946.437720</b>  | 473.722498      | 929.411171        | 465.209224       | <b>928.427155</b> | 464.717216       | 8  |
| 4  | <b>402.198324</b> | 201.602800      | 385.171775 | 193.089526       | 384.187759        | 192.597518       | S    | <b>817.395127</b>  | 409.201202      | 800.368578        | 400.687927       | 799.384562        | 400.195919       | 7  |
| 5  | <b>459.219788</b> | 230.113532      | 442.193239 | 221.600258       | 441.209223        | 221.108250       | G    | <b>730.363099</b>  | 365.685188      | 713.336550        | 357.171913       | 712.352534        | 356.679905       | 6  |
| 6  | 587.278366        | 294.142821      | 570.251817 | 285.629547       | 569.267801        | 285.137539       | Q    | <b>673.341635</b>  | 337.174456      | <b>656.315086</b> | 328.661181       | 655.331070        | 328.169173       | 5  |
| 7  | 674.310394        | 337.658835      | 657.283845 | 329.145560       | <b>656.299829</b> | 328.653552       | S    | <b>545.283057</b>  | 273.145167      | 528.256508        | 264.631892       | 527.272492        | 264.139884       | 4  |
| 8  | <b>860.389707</b> | 430.698492      | 843.363158 | 422.185217       | 842.379142        | 421.693209       | W    | <b>458.251029</b>  | 229.629153      | 441.224480        | 221.115878       |                   |                  | 3  |
| 9  | 957.442471        | 479.224874      | 940.415922 | 470.711599       | 939.431906        | 470.219591       | P    | <b>272.171716</b>  | 136.589496      | <b>255.145167</b> | 128.076221       |                   |                  | 2  |
| 10 |                   |                 |            |                  |                   |                  | R    | <b>175.118952</b>  | 88.063114       | 158.092403        | 79.549839        |                   |                  | 1  |

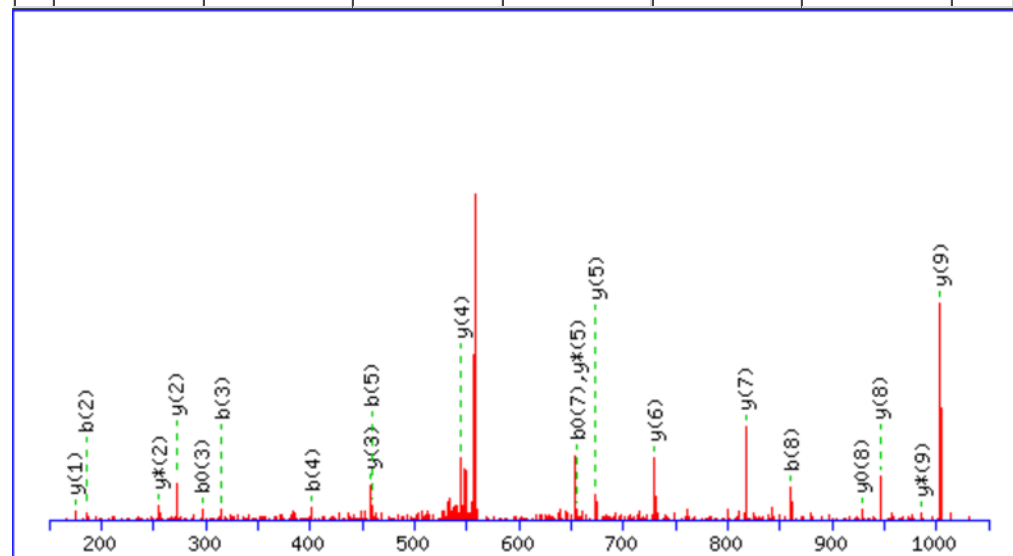

## Peptide View

MS/MS Fragmentation of **CQCPAGAALQADGR**

Found in **IPI00010737**, Tax\_Id=9606 Gene\_Symbol=THBD Thrombomodulin

**Experiment:** 56 - PyD-2 **Fraction:** PyD-2

Match to Query 10350: 1473.646248 from(737.830400,2+)

Title: OECHL100312\_40.7511.7511.2.dta

Data file \\Boromir\masse\Data LTQ-Orbitrap\Chrystelle Lacroix\Etude clinique sJPU\OECHL100312\_40.raw

**Monoisotopic mass of neutral peptide Mr(calc):** 1473.645279**Fixed modifications:** Carbamidomethyl (C) (apply to specified residues or termini only)**Ions Score:** 56**Expect:** 0.00012**Matches :** 16/128 fragment ions using 26 most intense peaks ([help](#))

| #  | b                  | b <sup>++</sup> | b*                | b <sup>+++</sup> | b <sup>0</sup> | b <sup>0++</sup> | Seq. | y                  | y <sup>++</sup>   | y*          | y <sup>+++</sup> | y <sup>0</sup> | y <sup>0++</sup> | #  |
|----|--------------------|-----------------|-------------------|------------------|----------------|------------------|------|--------------------|-------------------|-------------|------------------|----------------|------------------|----|
| 1  | 161.037925         | 81.022600       |                   |                  |                |                  | C    |                    |                   |             |                  |                |                  | 14 |
| 2  | <b>289.096503</b>  | 145.051890      | 272.069954        | 136.538615       |                |                  | Q    | 1314.621912        | 657.814594        | 1297.595363 | 649.301320       | 1296.611347    | 648.809312       | 13 |
| 3  | <b>449.127152</b>  | 225.067214      | 432.100603        | 216.553940       |                |                  | C    | <b>1186.563334</b> | <b>593.785305</b> | 1169.536785 | 585.272031       | 1168.552769    | 584.780023       | 12 |
| 4  | <b>546.179916</b>  | 273.593596      | 529.153367        | 265.080322       |                |                  | P    | <b>1026.532685</b> | 513.769981        | 1009.506136 | 505.256706       | 1008.522120    | 504.764698       | 11 |
| 5  | 617.217030         | 309.112153      | 600.190481        | 300.598879       |                |                  | A    | <b>929.479921</b>  | 465.243599        | 912.453372  | 456.730324       | 911.469356     | 456.238316       | 10 |
| 6  | 674.238494         | 337.622885      | 657.211945        | 329.109611       |                |                  | G    | <b>858.442807</b>  | 429.725042        | 841.416258  | 421.211767       | 840.432242     | 420.719759       | 9  |
| 7  | 745.275608         | 373.141442      | <b>728.249059</b> | 364.628168       |                |                  | A    | 801.421343         | 401.214310        | 784.394794  | 392.701035       | 783.410778     | 392.209027       | 8  |
| 8  | 816.312722         | 408.659999      | 799.286173        | 400.146725       |                |                  | A    | 730.384229         | 365.695753        | 713.357680  | 357.182478       | 712.373664     | 356.690470       | 7  |
| 9  | <b>929.396786</b>  | 465.202031      | 912.370237        | 456.688757       |                |                  | L    | <b>659.347115</b>  | 330.177196        | 642.320566  | 321.663921       | 641.336550     | 321.171913       | 6  |
| 10 | 1057.455364        | 529.231320      | 1040.428815       | 520.718046       |                |                  | Q    | <b>546.263051</b>  | 273.635164        | 529.236502  | 265.121889       | 528.252486     | 264.629881       | 5  |
| 11 | 1128.492478        | 564.749877      | 1111.465929       | 556.236603       |                |                  | A    | <b>418.204473</b>  | 209.605874        | 401.177924  | 201.092600       | 400.193908     | 200.600592       | 4  |
| 12 | <b>1243.519421</b> | 622.263349      | 1226.492872       | 613.750074       | 1225.508856    | 613.258066       | D    | <b>347.167359</b>  | 174.087317        | 330.140810  | 165.574043       | 329.156794     | 165.082035       | 3  |
| 13 | 1300.540885        | 650.774081      | 1283.514336       | 642.260806       | 1282.530320    | 641.768798       | G    | <b>232.140416</b>  | 116.573846        | 215.113867  | 108.060571       |                |                  | 2  |
| 14 |                    |                 |                   |                  |                |                  | R    | 175.118952         | 88.063114         | 158.092403  | 79.549839        |                |                  | 1  |

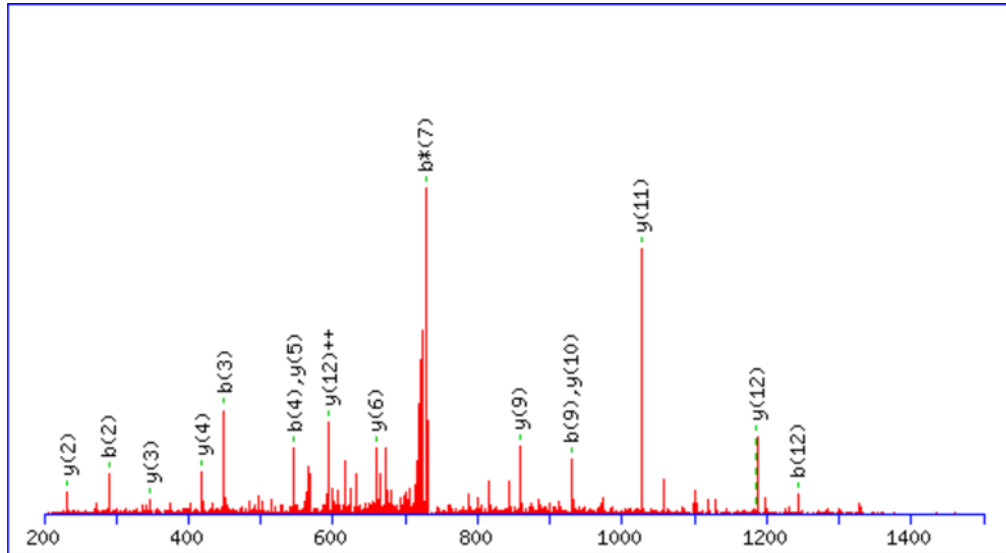

## Peptide View

MS/MS Fragmentation of **APVILGSPDDVLEFLK**

Found in **IPI00073772**, Tax\_Id=9606 Gene\_Symbol=FBP1 Fructose-1,6-bisphosphatase 1

**Experiment:** 56 - PyD-2 **Fraction:** PyD-2

Match to Query 13215: 1711.939648 from(856.977100,2+)

Title: OECHL100312\_40.22529.22529.2.dta

Data file \\Boromir\masse\Data LTQ-Orbitrap\Chrystelle Lacroix\Etude clinique sJPU\OECHL100312\_40.raw

**Monoisotopic mass of neutral peptide Mr(calc):** 1711.939636 **Fixed modifications:** Carbamidomethyl (C) (apply to specified residues or termini only) **Ions Score:** 73

**Expect:** 3.4e-006 **Matches :** 30/132 fragment ions using 58 most intense peaks ([help](#))

| # | b                 | b <sup>++</sup> | b <sup>0</sup> | b <sup>0++</sup> | Seq. | y                  | y <sup>++</sup>   | y <sup>*</sup>     | y <sup>*++</sup> | y <sup>0</sup>     | y <sup>0++</sup> | #  |
|---|-------------------|-----------------|----------------|------------------|------|--------------------|-------------------|--------------------|------------------|--------------------|------------------|----|
| 1 | 72.044390         | 36.525833       |                |                  | A    |                    |                   |                    |                  |                    |                  | 16 |
| 2 | 169.097154        | 85.052215       |                |                  | P    | 1641.909801        | 821.458538        | 1624.883252        | 812.945264       | 1623.899236        | 812.453256       | 15 |
| 3 | <b>268.165568</b> | 134.586422      |                |                  | V    | <b>1544.857037</b> | 772.932156        | 1527.830488        | 764.418882       | 1526.846472        | 763.926874       | 14 |
| 4 | <b>381.249632</b> | 191.128454      |                |                  | I    | <b>1445.788623</b> | <b>723.397949</b> | <b>1428.762074</b> | 714.884675       | <b>1427.778058</b> | 714.392667       | 13 |
| 5 | <b>494.333696</b> | 247.670486      |                |                  | L    | <b>1332.704559</b> | 666.855917        | 1315.678010        | 658.342643       | <b>1314.693994</b> | 657.850635       | 12 |
| 6 | <b>551.355160</b> | 276.181218      |                |                  | G    | <b>1219.620495</b> | 610.313885        | 1202.593946        | 601.800611       | 1201.609930        | 601.308603       | 11 |

|    |                    |            |                   |                   |   |                    |                   |             |                   |             |                   |           |
|----|--------------------|------------|-------------------|-------------------|---|--------------------|-------------------|-------------|-------------------|-------------|-------------------|-----------|
| 7  | <b>638.387188</b>  | 319.697232 | <b>620.376623</b> | <b>310.691950</b> | S | <b>1162.599031</b> | 581.803153        | 1145.572482 | 573.289879        | 1144.588466 | 572.797871        | <b>10</b> |
| 8  | 735.439952         | 368.223614 | 717.429387        | 359.218332        | P | <b>1075.567003</b> | 538.287139        | 1058.540454 | 529.773865        | 1057.556438 | 529.281857        | <b>9</b>  |
| 9  | 850.466895         | 425.737086 | 832.456330        | 416.731803        | D | <b>978.514239</b>  | 489.760757        | 961.487690  | 481.247483        | 960.503674  | 480.755475        | <b>8</b>  |
| 10 | <b>965.493838</b>  | 483.250557 | 947.483273        | 474.245274        | D | <b>863.487296</b>  | 432.247286        | 846.460747  | <b>423.734011</b> | 845.476731  | <b>423.242003</b> | <b>7</b>  |
| 11 | <b>1064.562252</b> | 532.784764 | 1046.551687       | 523.779481        | V | 748.460353         | 374.733814        | 731.433804  | 366.220540        | 730.449788  | 365.728532        | <b>6</b>  |
| 12 | 1177.646316        | 589.326796 | 1159.635751       | 580.321513        | L | <b>649.391939</b>  | 325.199607        | 632.365390  | 316.686333        | 631.381374  | 316.194325        | <b>5</b>  |
| 13 | <b>1306.688909</b> | 653.848092 | 1288.678344       | 644.842810        | E | <b>536.307875</b>  | <b>268.657576</b> | 519.281326  | 260.144301        | 518.297310  | 259.652293        | <b>4</b>  |
| 14 | <b>1453.757323</b> | 727.382299 | 1435.746758       | 718.377017        | F | <b>407.265282</b>  | 204.136279        | 390.238733  | 195.623004        |             |                   | <b>3</b>  |
| 15 | <b>1566.841387</b> | 783.924331 | 1548.830822       | 774.919049        | L | 260.196868         | 130.602072        | 243.170319  | 122.088797        |             |                   | <b>2</b>  |
| 16 |                    |            |                   |                   | K | 147.112804         | 74.060040         | 130.086255  | 65.546765         |             |                   | <b>1</b>  |

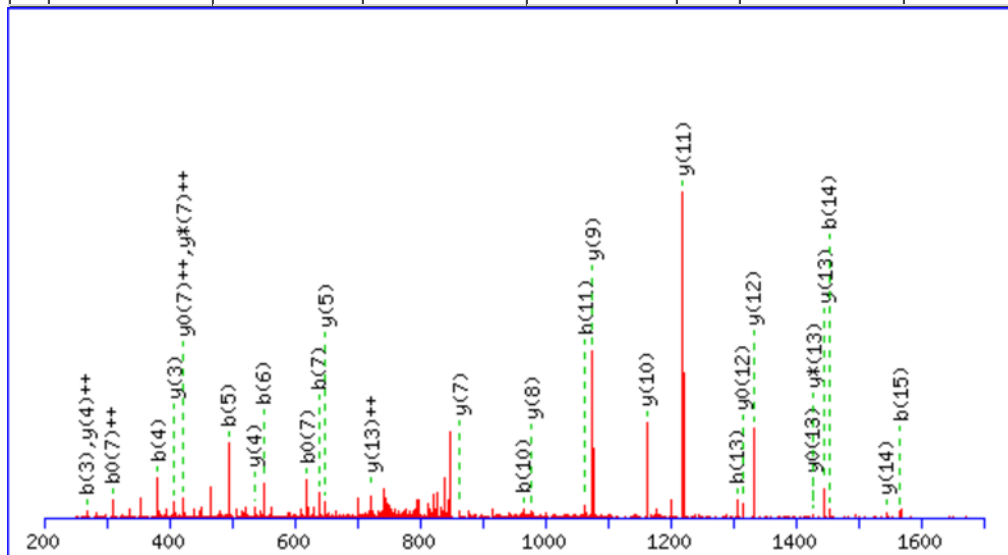

## Peptide View

MS/MS Fragmentation of **AVGLLTVISK**

Found in **IP100013446**, Tax\_Id=9606 Gene\_Symbol=PSCA Prostate stem cell antigen

**Experiment:** 56 - PyD-2 **Fraction:** PyD-2

Match to Query 4208: 999.633048 from(500.823800,2+)

Title: OECHL100312\_40.17372.17372.2.dta

Data file \\Boromir\masse\Data LTQ-Orbitrap\Chrystelle Lacroix\Etude clinique sJPU\OECHL100312\_40.raw

**Monoisotopic mass of neutral peptide Mr(calc):** 999.632828**Fixed modifications:** Carbamidomethyl (C) (apply to specified residues or termini only)**Ions Score:** 54**Expect:** 5.2e-005**Matches :** 16/78 fragment ions using 34 most intense peaks ([help](#))

| #  | b                 | b <sup>++</sup>   | b <sup>0</sup> | b <sup>0++</sup> | Seq. | y                 | y <sup>++</sup> | y*         | y* <sup>++</sup> | y <sup>0</sup> | y <sup>0++</sup> | #  |
|----|-------------------|-------------------|----------------|------------------|------|-------------------|-----------------|------------|------------------|----------------|------------------|----|
| 1  | 72.044390         | 36.525833         |                |                  | A    |                   |                 |            |                  |                |                  | 10 |
| 2  | <b>171.112804</b> | 86.060040         |                |                  | V    | 929.602995        | 465.305136      | 912.576446 | 456.791861       | 911.592430     | 456.299853       | 9  |
| 3  | <b>228.134268</b> | 114.570772        |                |                  | G    | <b>830.534581</b> | 415.770929      | 813.508032 | 407.257654       | 812.524016     | 406.765646       | 8  |
| 4  | <b>341.218332</b> | <b>171.112804</b> |                |                  | L    | <b>773.513117</b> | 387.260197      | 756.486568 | 378.746922       | 755.502552     | 378.254914       | 7  |
| 5  | <b>454.302396</b> | <b>227.654836</b> |                |                  | L    | <b>660.429053</b> | 330.718165      | 643.402504 | 322.204890       | 642.418488     | 321.712882       | 6  |
| 6  | <b>555.350075</b> | 278.178676        | 537.339510     | 269.173393       | T    | <b>547.344989</b> | 274.176133      | 530.318440 | 265.662858       | 529.334424     | 265.170850       | 5  |
| 7  | <b>654.418489</b> | 327.712883        | 636.407924     | 318.707600       | V    | 446.297310        | 223.652293      | 429.270761 | 215.139018       | 428.286745     | 214.647010       | 4  |
| 8  | <b>767.502553</b> | 384.254915        | 749.491988     | 375.249632       | I    | <b>347.228896</b> | 174.118086      | 330.202347 | 165.604811       | 329.218331     | 165.112803       | 3  |
| 9  | <b>854.534581</b> | 427.770929        | 836.524016     | 418.765646       | S    | <b>234.144832</b> | 117.576054      | 217.118283 | 109.062779       | 216.134267     | 108.570771       | 2  |
| 10 |                   |                   |                |                  | K    | 147.112804        | 74.060040       | 130.086255 | 65.546765        |                |                  | 1  |

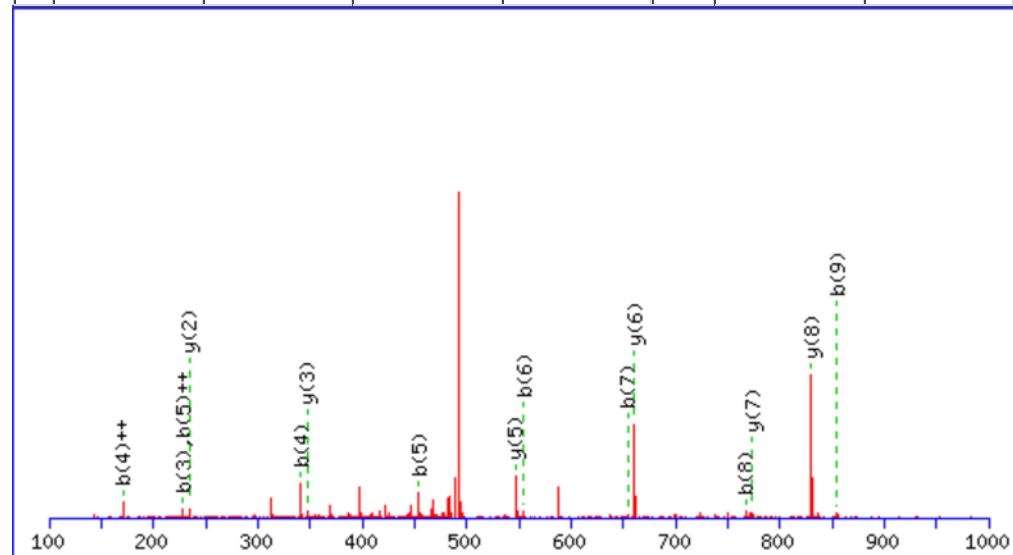

## Peptide View

MS/MS Fragmentation of **TFGQGTKLEIKR**Found in **IPI00827643**, Tax\_Id=9606 Gene\_Symbol=- HRV Fab 027-VL (Fragment)**Experiment:** 56 - PyD-2 **Fraction:** PyD-2

Match to Query 9455: 1376.781048 from(689.397800,2+)

Title: OECHL100312\_40.7976.7976.2.dta

Data file \\Boromir\masse\Data LTQ-Orbitrap\Chrystelle Lacroix\Etude clinique sJPU\OECHL100312\_40.raw

**Monoisotopic mass of neutral peptide Mr(calc):** 1376.777588**Fixed modifications:** Carbamidomethyl (C) (apply to specified residues or termini only)**Ions Score:** 57**Expect:** 6.9e-005**Matches :** 29/120 fragment ions using 33 most intense peaks ([help](#))

| #         | b                  | b <sup>++</sup>   | b <sup>*</sup>    | b <sup>*++</sup>  | b <sup>0</sup>    | b <sup>0++</sup>  | Seq.     | y                  | y <sup>++</sup>   | y <sup>*</sup>     | y <sup>*++</sup>  | y <sup>0</sup> | y <sup>0++</sup>  | #         |
|-----------|--------------------|-------------------|-------------------|-------------------|-------------------|-------------------|----------|--------------------|-------------------|--------------------|-------------------|----------------|-------------------|-----------|
| <b>1</b>  | 102.054955         | 51.531116         |                   |                   | 84.044390         | 42.525833         | <b>T</b> |                    |                   |                    |                   |                |                   | <b>12</b> |
| <b>2</b>  | <b>249.123369</b>  | 125.065322        |                   |                   | 231.112804        | 116.060040        | <b>F</b> | 1276.737198        | <b>638.872237</b> | 1259.710649        | 630.358963        | 1258.726633    | 629.866955        | <b>11</b> |
| <b>3</b>  | 306.144833         | 153.576054        |                   |                   | 288.134268        | 144.570772        | <b>G</b> | <b>1129.668784</b> | <b>565.338030</b> | <b>1112.642235</b> | 556.824756        | 1111.658219    | 556.332748        | <b>10</b> |
| <b>4</b>  | 434.203411         | 217.605343        | <b>417.176862</b> | 209.092069        | <b>416.192846</b> | 208.600061        | <b>Q</b> | 1072.647320        | 536.827298        | 1055.620771        | <b>528.314024</b> | 1054.636755    | <b>527.822016</b> | <b>9</b>  |
| <b>5</b>  | 491.224875         | 246.116075        | 474.198326        | 237.602801        | <b>473.214310</b> | 237.110793        | <b>G</b> | <b>944.588742</b>  | <b>472.798009</b> | 927.562193         | 464.284735        | 926.578177     | 463.792727        | <b>8</b>  |
| <b>6</b>  | 592.272554         | 296.639915        | 575.246005        | 288.126641        | 574.261989        | 287.634633        | <b>T</b> | <b>887.567278</b>  | 444.287277        | 870.540729         | 435.774003        | 869.556713     | 435.281995        | <b>7</b>  |
| <b>7</b>  | 720.367517         | 360.687397        | 703.340968        | 352.174122        | 702.356952        | 351.682114        | <b>K</b> | <b>786.519599</b>  | 393.763438        | 769.493050         | 385.250163        | 768.509034     | 384.758155        | <b>6</b>  |
| <b>8</b>  | <b>833.451581</b>  | <b>417.229429</b> | 816.425032        | 408.716154        | 815.441016        | 408.224146        | <b>L</b> | <b>658.424636</b>  | 329.715956        | 641.398087         | 321.202682        | 640.414071     | 320.710674        | <b>5</b>  |
| <b>9</b>  | <b>962.494174</b>  | 481.750725        | <b>945.467625</b> | <b>473.237451</b> | <b>944.483609</b> | <b>472.745443</b> | <b>E</b> | <b>545.340572</b>  | 273.173924        | <b>528.314023</b>  | 264.660650        | 527.330007     | 264.168642        | <b>4</b>  |
| <b>10</b> | <b>1075.578238</b> | 538.292757        | 1058.551689       | 529.779483        | 1057.567673       | 529.287475        | <b>I</b> | <b>416.297979</b>  | 208.652627        | <b>399.271430</b>  | 200.139353        |                |                   | <b>3</b>  |
| <b>11</b> | <b>1203.673201</b> | 602.340239        | 1186.646652       | 593.826964        | 1185.662636       | 593.334956        | <b>K</b> | <b>303.213915</b>  | 152.110595        | 286.187366         | 143.597321        |                |                   | <b>2</b>  |
| <b>12</b> |                    |                   |                   |                   |                   |                   | <b>R</b> | 175.118952         | 88.063114         | 158.092403         | 79.549839         |                |                   | <b>1</b>  |

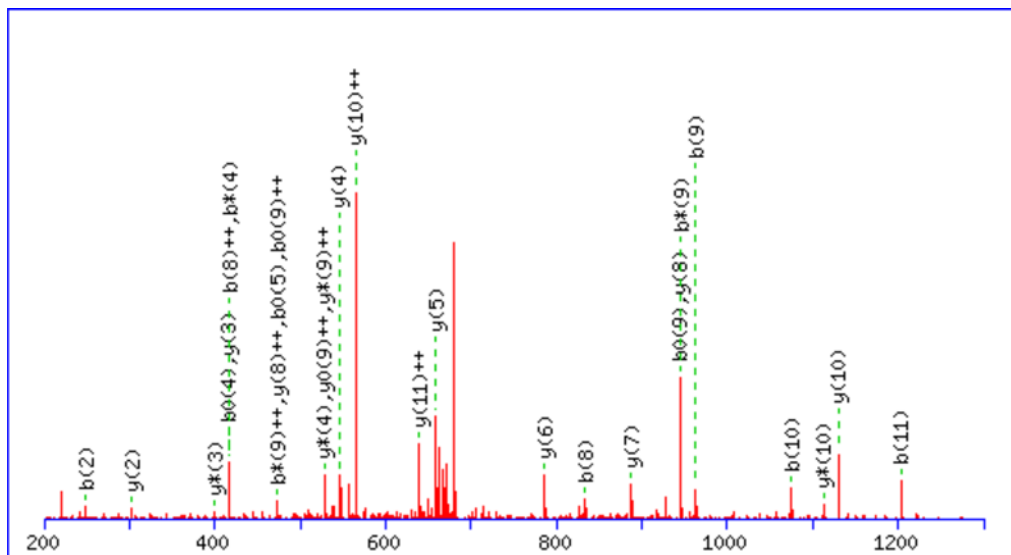

## Peptide View

MS/MS Fragmentation of **WADAECEEIPGR**

Found in **IPI00027436**, Tax\_Id=9606 Gene\_Symbol=NGFR Tumor necrosis factor receptor superfamily member 16

**Experiment:** 56 - PyD-2 **Fraction:** PyD-2

Match to Query 9819: 1431.611848 from(716.813200,2+)

Title: OECHL100312\_40.11208.11208.2.dta

Data file \\Boromir\masse\Data LTQ-Orbitrap\Chrystelle Lacroix\Etude clinique sJPU\OECHL100312\_40.raw

**Monoisotopic mass of neutral peptide Mr(calc):** 1431.608856 **Fixed modifications:** Carbamidomethyl (C) (apply to specified residues or termini only) **Ions Score:** 67

**Expect:** 7.2e-006 **Matches :** 18/98 fragment ions using 38 most intense peaks ([help](#))

| # | b                 | b <sup>++</sup> | b <sup>0</sup> | b <sup>0++</sup> | Seq. | y                  | y <sup>++</sup> | y <sup>*</sup> | y <sup>*++</sup>  | y <sup>0</sup> | y <sup>0++</sup> | #  |
|---|-------------------|-----------------|----------------|------------------|------|--------------------|-----------------|----------------|-------------------|----------------|------------------|----|
| 1 | 187.086589        | 94.046932       |                |                  | W    |                    |                 |                |                   |                |                  | 12 |
| 2 | <b>258.123703</b> | 129.565490      |                |                  | A    | <b>1246.536843</b> | 623.772060      | 1229.510294    | 615.258785        | 1228.526278    | 614.766777       | 11 |
| 3 | <b>373.150646</b> | 187.078961      | 355.140081     | 178.073679       | D    | <b>1175.499729</b> | 588.253502      | 1158.473180    | <b>579.740228</b> | 1157.489164    | 579.248220       | 10 |
| 4 | 444.187760        | 222.597518      | 426.177195     | 213.592236       | A    | <b>1060.472786</b> | 530.740031      | 1043.446237    | 522.226757        | 1042.462221    | 521.734749       | 9  |
| 5 | 573.230353        | 287.118815      | 555.219788     | 278.113532       | E    | <b>989.435672</b>  | 495.221474      | 972.409123     | 486.708199        | 971.425107     | 486.216191       | 8  |
| 6 | 733.261002        | 367.134139      | 715.250437     | 358.128857       | C    | <b>860.393079</b>  | 430.700178      | 843.366530     | 422.186903        | 842.382514     | 421.694895       | 7  |

|    |                    |            |             |            |          |                   |            |            |            |            |            |          |
|----|--------------------|------------|-------------|------------|----------|-------------------|------------|------------|------------|------------|------------|----------|
| 7  | <b>862.303595</b>  | 431.655436 | 844.293030  | 422.650153 | <b>E</b> | <b>700.362430</b> | 350.684853 | 683.335881 | 342.171578 | 682.351865 | 341.679570 | <b>6</b> |
| 8  | <b>991.346188</b>  | 496.176732 | 973.335623  | 487.171450 | <b>E</b> | <b>571.319837</b> | 286.163556 | 554.293288 | 277.650282 | 553.309272 | 277.158274 | <b>5</b> |
| 9  | <b>1104.430252</b> | 552.718764 | 1086.419687 | 543.713482 | <b>I</b> | <b>442.277244</b> | 221.642260 | 425.250695 | 213.128985 |            |            | <b>4</b> |
| 10 | <b>1201.483016</b> | 601.245146 | 1183.472451 | 592.239864 | <b>P</b> | <b>329.193180</b> | 165.100228 | 312.166631 | 156.586953 |            |            | <b>3</b> |
| 11 | <b>1258.504480</b> | 629.755878 | 1240.493915 | 620.750596 | <b>G</b> | <b>232.140416</b> | 116.573846 | 215.113867 | 108.060571 |            |            | <b>2</b> |
| 12 |                    |            |             |            | <b>R</b> | 175.118952        | 88.063114  | 158.092403 | 79.549839  |            |            | <b>1</b> |

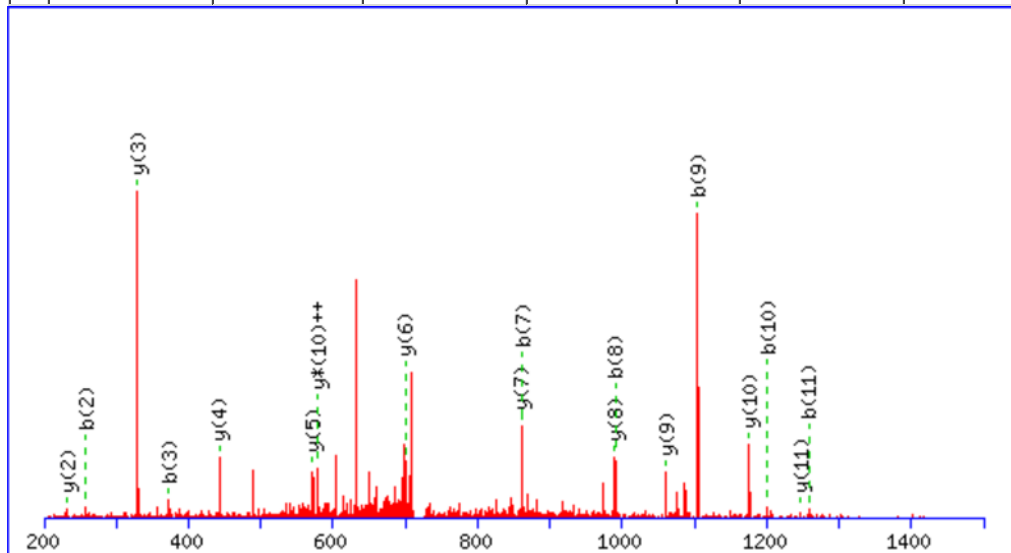

## Peptide View

MS/MS Fragmentation of **YSGSEGSTQTLTKGELK**

Found in **IP100017526**, Tax\_Id=9606 Gene\_Symbol=S100P Protein S100-P

**Experiment:** 56 - PyD-2 **Fraction:** PyD-2

Match to Query 13723: 1784.880048 from(893.447300,2+)

Title: OECHL100312\_40.7612.7612.2.dta

Data file \\Boromir\masse\Data LTQ-Orbitrap\Chrystelle Lacroix\Etude clinique sJPU\OECHL100312\_40.raw

**Monoisotopic mass of neutral peptide Mr(calc):** 1784.879211 **Fixed modifications:** Carbamidomethyl (C) (apply to specified residues or termini only) **Ions Score:** 66

**Expect:** 3.5e-005 **Matches :** 10/170 fragment ions using 15 most intense peaks ([help](#))

| # | <b>b</b> | <b>b<sup>++</sup></b> | <b>b<sup>*</sup></b> | <b>b<sup>*++</sup></b> | <b>b<sup>0</sup></b> | <b>b<sup>0++</sup></b> | Seq. | <b>y</b> | <b>y<sup>++</sup></b> | <b>y<sup>*</sup></b> | <b>y<sup>*++</sup></b> | <b>y<sup>0</sup></b> | <b>y<sup>0++</sup></b> | # |
|---|----------|-----------------------|----------------------|------------------------|----------------------|------------------------|------|----------|-----------------------|----------------------|------------------------|----------------------|------------------------|---|
|---|----------|-----------------------|----------------------|------------------------|----------------------|------------------------|------|----------|-----------------------|----------------------|------------------------|----------------------|------------------------|---|



|    |             |            |             |            |             |            |   |             |            |             |            |             |            |    |
|----|-------------|------------|-------------|------------|-------------|------------|---|-------------|------------|-------------|------------|-------------|------------|----|
| 1  | 164.070605  | 82.538940  |             |            |             |            | Y |             |            |             |            |             |            | 17 |
| 2  | 251.102633  | 126.054954 |             |            | 233.092068  | 117.049672 | S | 1622.823172 | 811.915224 | 1605.796623 | 803.401950 | 1604.812607 | 802.909941 | 16 |
| 3  | 308.124097  | 154.565687 |             |            | 290.113532  | 145.560404 | G | 1535.791144 | 768.399210 | 1518.764595 | 759.885936 | 1517.780579 | 759.393928 | 15 |
| 4  | 395.156125  | 198.081701 |             |            | 377.145560  | 189.076418 | S | 1478.769680 | 739.888478 | 1461.743131 | 731.375204 | 1460.759115 | 730.883195 | 14 |
| 5  | 524.198718  | 262.602997 |             |            | 506.188153  | 253.597715 | E | 1391.737652 | 696.372464 | 1374.711103 | 687.859190 | 1373.727087 | 687.367182 | 13 |
| 6  | 581.220182  | 291.113729 |             |            | 563.209617  | 282.108447 | G | 1262.695059 | 631.851167 | 1245.668510 | 623.337893 | 1244.684494 | 622.845885 | 12 |
| 7  | 668.252210  | 334.629743 |             |            | 650.241645  | 325.624461 | S | 1205.673595 | 603.340436 | 1188.647046 | 594.827161 | 1187.663030 | 594.335153 | 11 |
| 8  | 769.299889  | 385.153583 |             |            | 751.289324  | 376.148300 | T | 1118.641567 | 559.824421 | 1101.615018 | 551.311147 | 1100.631002 | 550.819139 | 10 |
| 9  | 897.358467  | 449.182872 | 880.331918  | 440.669597 | 879.347902  | 440.177589 | Q | 1017.593888 | 509.300582 | 1000.567339 | 500.787307 | 999.583323  | 500.295299 | 9  |
| 10 | 998.406146  | 499.706711 | 981.379597  | 491.193437 | 980.395581  | 490.701429 | T | 889.535310  | 445.271293 | 872.508761  | 436.758018 | 871.524745  | 436.266010 | 8  |
| 11 | 1111.490210 | 556.248743 | 1094.463661 | 547.735469 | 1093.479645 | 547.243461 | L | 788.487631  | 394.747453 | 771.461082  | 386.234179 | 770.477066  | 385.742171 | 7  |
| 12 | 1212.537889 | 606.772583 | 1195.511340 | 598.259308 | 1194.527324 | 597.767300 | T | 675.403567  | 338.205421 | 658.377018  | 329.692147 | 657.393002  | 329.200139 | 6  |
| 13 | 1340.632852 | 670.820064 | 1323.606303 | 662.306790 | 1322.622287 | 661.814782 | K | 574.355888  | 287.681582 | 557.329339  | 279.168307 | 556.345323  | 278.676299 | 5  |
| 14 | 1397.654316 | 699.330796 | 1380.627767 | 690.817522 | 1379.643751 | 690.325514 | G | 446.260925  | 223.634100 | 429.234376  | 215.120826 | 428.250360  | 214.628818 | 4  |
| 15 | 1526.696909 | 763.852093 | 1509.670360 | 755.338818 | 1508.686344 | 754.846810 | E | 389.239461  | 195.123368 | 372.212912  | 186.610094 | 371.228896  | 186.118086 | 3  |
| 16 | 1639.780973 | 820.394124 | 1622.754424 | 811.880850 | 1621.770408 | 811.388842 | L | 260.196868  | 130.602072 | 243.170319  | 122.088797 |             |            | 2  |
| 17 |             |            |             |            |             |            | K | 147.112804  | 74.060040  | 130.086255  | 65.546765  |             |            | 1  |

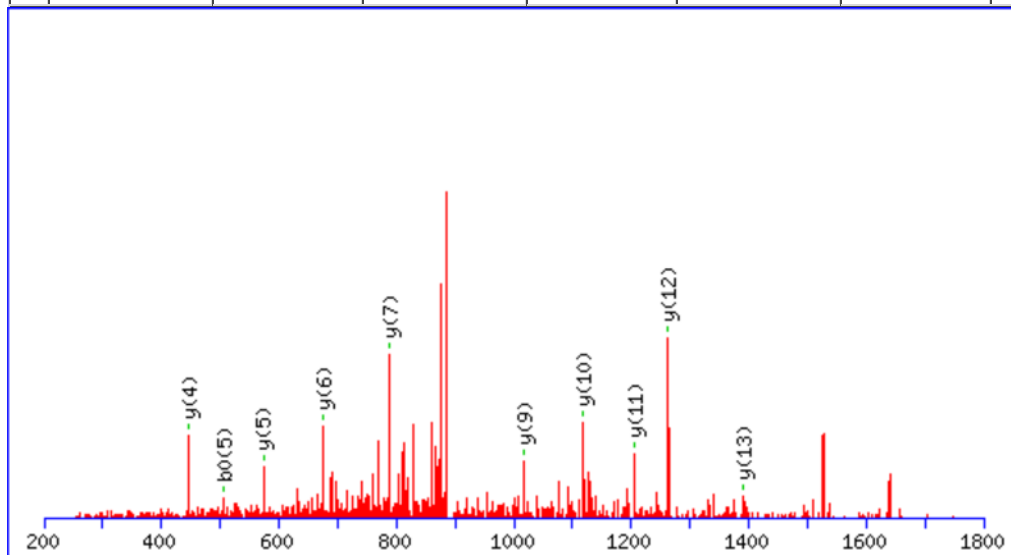

## Peptide View

MS/MS Fragmentation of **MVTAVASALSSR**

Found in **IPI00220706**, Tax\_Id=9606 Gene\_Symbol=HBG2;HBG1 Hemoglobin subunit gamma-1

**Experiment:** 56 - PyD-2 **Fraction:** PyD-2

Match to Query 7196: 1207.623248 from(604.818900,2+)

Title: OECHL100312\_40.10286.10286.2.dta

Data file \\Boromir\masse\Data LTQ-Orbitrap\Chrystelle Lacroix\Etude clinique sJPU\OECHL100312\_40.raw

**Monoisotopic mass of neutral peptide Mr(calc):** 1207.623062 **Fixed modifications:** Carbamidomethyl (C) (apply to specified residues or termini only) **Variable modifications:** **M1** : Oxidation (M), with neutral loss 63.998285 **Ions Score:** 57 **Expect:** 0.00019 **Matches :** 10/104 fragment ions using 31 most intense peaks ([help](#))

| #         | b          | b <sup>++</sup> | b <sup>0</sup> | b <sup>0++</sup> | Seq.     | y                  | y <sup>++</sup> | y*          | y* <sup>++</sup> | y <sup>0</sup> | y <sup>0++</sup> | #         |
|-----------|------------|-----------------|----------------|------------------|----------|--------------------|-----------------|-------------|------------------|----------------|------------------|-----------|
| <b>1</b>  | 84.044391  | 42.525833       |                |                  | <b>M</b> |                    |                 |             |                  |                |                  | <b>12</b> |
| <b>2</b>  | 183.112805 | 92.060040       |                |                  | <b>V</b> | <b>1061.594949</b> | 531.301113      | 1044.568400 | 522.787838       | 1043.584384    | 522.295830       | <b>11</b> |
| <b>3</b>  | 284.160484 | 142.583880      | 266.149919     | 133.578598       | <b>T</b> | <b>962.526535</b>  | 481.766906      | 945.499986  | 473.253631       | 944.515970     | 472.761623       | <b>10</b> |
| <b>4</b>  | 355.197598 | 178.102437      | 337.187033     | 169.097155       | <b>A</b> | <b>861.478856</b>  | 431.243066      | 844.452307  | 422.729791       | 843.468291     | 422.237783       | <b>9</b>  |
| <b>5</b>  | 454.266012 | 227.636644      | 436.255447     | 218.631362       | <b>V</b> | <b>790.441742</b>  | 395.724509      | 773.415193  | 387.211234       | 772.431177     | 386.719226       | <b>8</b>  |
| <b>6</b>  | 525.303126 | 263.155201      | 507.292561     | 254.149919       | <b>A</b> | <b>691.373328</b>  | 346.190302      | 674.346779  | 337.677028       | 673.362763     | 337.185020       | <b>7</b>  |
| <b>7</b>  | 612.335154 | 306.671215      | 594.324589     | 297.665933       | <b>S</b> | <b>620.336214</b>  | 310.671745      | 603.309665  | 302.158471       | 602.325649     | 301.666463       | <b>6</b>  |
| <b>8</b>  | 683.372268 | 342.189772      | 665.361703     | 333.184489       | <b>A</b> | <b>533.304186</b>  | 267.155731      | 516.277637  | 258.642457       | 515.293621     | 258.150449       | <b>5</b>  |
| <b>9</b>  | 796.456332 | 398.731804      | 778.445767     | 389.726521       | <b>L</b> | <b>462.267072</b>  | 231.637174      | 445.240523  | 223.123899       | 444.256507     | 222.631891       | <b>4</b>  |
| <b>10</b> | 883.488360 | 442.247818      | 865.477795     | 433.242535       | <b>S</b> | <b>349.183008</b>  | 175.095142      | 332.156459  | 166.581867       | 331.172443     | 166.089859       | <b>3</b>  |
| <b>11</b> | 970.520388 | 485.763832      | 952.509823     | 476.758549       | <b>S</b> | <b>262.150980</b>  | 131.579128      | 245.124431  | 123.065854       | 244.140415     | 122.573846       | <b>2</b>  |
| <b>12</b> |            |                 |                |                  | <b>R</b> | 175.118952         | 88.063114       | 158.092403  | 79.549839        |                |                  | <b>1</b>  |

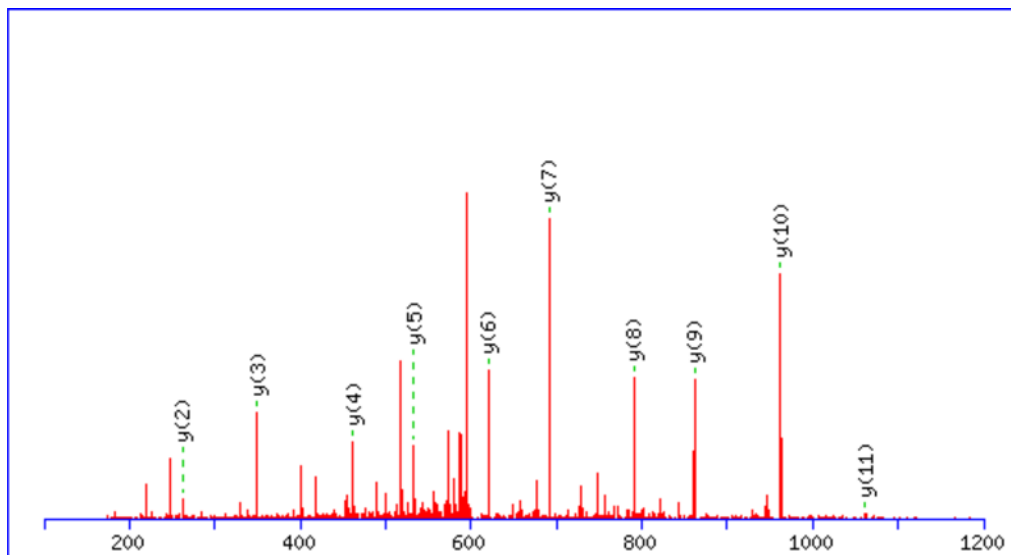

## Peptide View

MS/MS Fragmentation of **AHGQESAI FNEVAPGYFSR**

Found in **IPI00170635**, Tax\_Id=9606 Gene\_Symbol=SECTM1 Secreted and transmembrane protein 1

**Experiment:** 44 - OPE-2 **Fraction:** OPE-2

Match to Query 15511: 2078.987448 from(1040.501000,2+)

Title: OECHL100312\_38.17308.17308.2.dta

Data file \\Boromir\masse\Data LTQ-Orbitrap\Chrystelle Lacroix\Etude clinique sJPU\OECHL100312\_38.raw

**Monoisotopic mass of neutral peptide Mr(calc):** 2078.980988 **Fixed modifications:** Carbamidomethyl (C) (apply to specified residues or termini only) **Ions Score:** 73

**Expect:** 7.2e-006 **Matches :** 39/200 fragment ions using 82 most intense peaks ([help](#))

| # | b          | b <sup>++</sup> | b*         | b <sup>*++</sup> | b <sup>0</sup> | b <sup>0++</sup> | Seq. | y           | y <sup>++</sup> | y*          | y <sup>*++</sup> | y <sup>0</sup> | y <sup>0++</sup> | #  |
|---|------------|-----------------|------------|------------------|----------------|------------------|------|-------------|-----------------|-------------|------------------|----------------|------------------|----|
| 1 | 72.044390  | 36.525833       |            |                  |                |                  | A    |             |                 |             |                  |                |                  | 19 |
| 2 | 209.103302 | 105.055289      |            |                  |                |                  | H    | 2008.951166 | 1004.979221     | 1991.924617 | 996.465947       | 1990.940601    | 995.973939       | 18 |
| 3 | 266.124766 | 133.566021      |            |                  |                |                  | G    | 1871.892254 | 936.449765      | 1854.865705 | 927.936491       | 1853.881689    | 927.444483       | 17 |
| 4 | 394.183344 | 197.595310      | 377.156795 | 189.082035       |                |                  | Q    | 1814.870790 | 907.939033      | 1797.844241 | 899.425759       | 1796.860225    | 898.933751       | 16 |
| 5 | 523.225937 | 262.116607      | 506.199388 | 253.603332       | 505.215372     | 253.111324       | E    | 1686.812212 | 843.909744      | 1669.785663 | 835.396470       | 1668.801647    | 834.904462       | 15 |
| 6 | 610.257965 | 305.632621      | 593.231416 | 297.119346       | 592.247400     | 296.627338       | S    | 1557.769619 | 779.388448      | 1540.743070 | 770.875173       | 1539.759054    | 770.383165       | 14 |

|    |                    |                   |             |            |                   |            |          |                    |            |                   |                   |                   |                   |           |
|----|--------------------|-------------------|-------------|------------|-------------------|------------|----------|--------------------|------------|-------------------|-------------------|-------------------|-------------------|-----------|
| 7  | <b>681.295079</b>  | 341.151178        | 664.268530  | 332.637903 | <b>663.284514</b> | 332.145895 | <b>A</b> | <b>1470.737591</b> | 735.872434 | 1453.711042       | <b>727.359159</b> | 1452.727026       | <b>726.867151</b> | <b>13</b> |
| 8  | <b>794.379143</b>  | 397.693210        | 777.352594  | 389.179935 | 776.368578        | 388.687927 | <b>I</b> | <b>1399.700477</b> | 700.353877 | 1382.673928       | 691.840602        | 1381.689912       | 691.348594        | <b>12</b> |
| 9  | <b>941.447557</b>  | 471.227417        | 924.421008  | 462.714142 | 923.436992        | 462.222134 | <b>F</b> | <b>1286.616413</b> | 643.811845 | 1269.589864       | 635.298570        | 1268.605848       | 634.806562        | <b>11</b> |
| 10 | 1055.490484        | 528.248880        | 1038.463935 | 519.735606 | 1037.479919       | 519.243597 | <b>N</b> | <b>1139.547999</b> | 570.277638 | 1122.521450       | 561.764363        | 1121.537434       | 561.272355        | <b>10</b> |
| 11 | <b>1184.533077</b> | <b>592.770176</b> | 1167.506528 | 584.256902 | 1166.522512       | 583.764894 | <b>E</b> | <b>1025.505072</b> | 513.256174 | 1008.478523       | 504.742900        | 1007.494507       | <b>504.250892</b> | <b>9</b>  |
| 12 | <b>1283.601491</b> | 642.304383        | 1266.574942 | 633.791109 | 1265.590926       | 633.299101 | <b>V</b> | <b>896.462479</b>  | 448.734878 | 879.435930        | 440.221603        | 878.451914        | 439.729595        | <b>8</b>  |
| 13 | <b>1354.638605</b> | 677.822940        | 1337.612056 | 669.309666 | 1336.628040       | 668.817658 | <b>A</b> | <b>797.394065</b>  | 399.200671 | 780.367516        | 390.687396        | 779.383500        | 390.195388        | <b>7</b>  |
| 14 | <b>1451.691369</b> | <b>726.349322</b> | 1434.664820 | 717.836048 | 1433.680804       | 717.344040 | <b>P</b> | <b>726.356951</b>  | 363.682114 | <b>709.330402</b> | 355.168839        | <b>708.346386</b> | 354.676831        | <b>6</b>  |
| 15 | 1508.712833        | 754.860054        | 1491.686284 | 746.346780 | 1490.702268       | 745.854772 | <b>G</b> | <b>629.304187</b>  | 315.155732 | 612.277638        | 306.642457        | 611.293622        | 306.150449        | <b>5</b>  |
| 16 | <b>1671.776162</b> | 836.391719        | 1654.749613 | 827.878445 | 1653.765597       | 827.386436 | <b>Y</b> | <b>572.282723</b>  | 286.645000 | 555.256174        | 278.131725        | 554.272158        | 277.639717        | <b>4</b>  |
| 17 | <b>1818.844576</b> | 909.925926        | 1801.818027 | 901.412652 | 1800.834011       | 900.920643 | <b>F</b> | <b>409.219394</b>  | 205.113335 | 392.192845        | 196.600061        | 391.208829        | 196.108053        | <b>3</b>  |
| 18 | 1905.876604        | 953.441940        | 1888.850055 | 944.928666 | 1887.866039       | 944.436658 | <b>S</b> | 262.150980         | 131.579128 | 245.124431        | 123.065854        | 244.140415        | 122.573846        | <b>2</b>  |
| 19 |                    |                   |             |            |                   |            | <b>R</b> | 175.118952         | 88.063114  | 158.092403        | 79.549840         |                   |                   | <b>1</b>  |

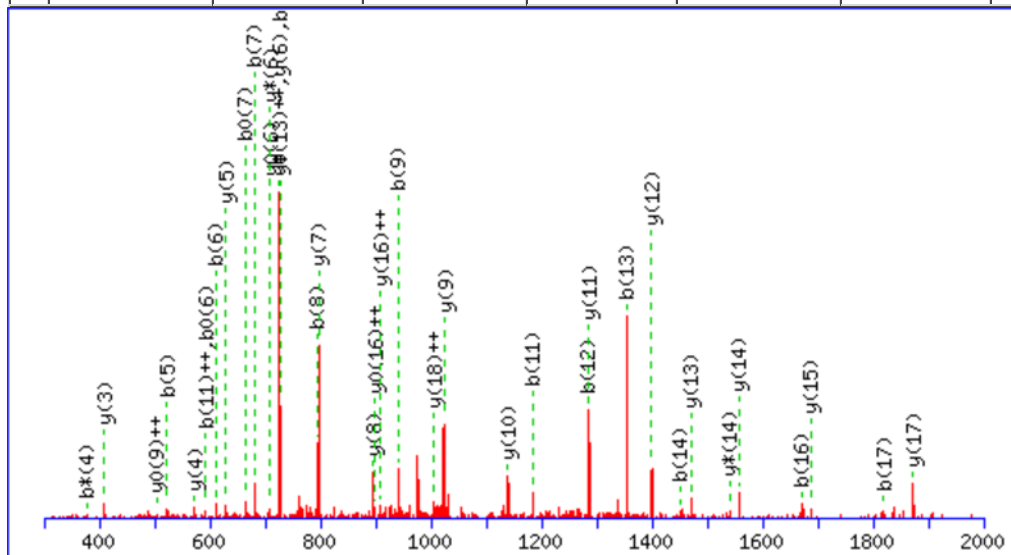

## Peptide View

MS/MS Fragmentation of **NPVLQQDAHSSVTTPQR**

Found in **IPI00410488**, Tax\_Id=9606 Gene\_Symbol=CD276 Isoform 1 of CD276 antigen

**Experiment:** 44 - OPE-2 **Fraction:** OPE-2

Match to Query 15050: 1990.024248 from(996.019400,2+)

Title: OECHL100312\_38.10225.10225.2.dta

Data file \\Boromir\masse\Data LTQ-Orbitrap\Chrystelle Lacroix\Etude clinique sJPU\OECHL100312\_38.raw

**Monoisotopic mass of neutral peptide Mr(calc):** 1990.023209**Fixed modifications:** Carbamidomethyl (C) (apply to specified residues or termini only)**Ions Score:** 77

**Expect:** 2.5e-006**Matches :** 71/186 fragment ions using 144 most intense peaks ([help](#))

| #  | b                  | b <sup>++</sup>   | b <sup>*</sup>     | b <sup>*++</sup>  | b <sup>0</sup>     | b <sup>0++</sup>  | Seq. | y                  | y <sup>++</sup>   | y <sup>*</sup>     | y <sup>*++</sup>  | y <sup>0</sup>     | y <sup>0++</sup>  | #  |
|----|--------------------|-------------------|--------------------|-------------------|--------------------|-------------------|------|--------------------|-------------------|--------------------|-------------------|--------------------|-------------------|----|
| 1  | 115.050203         | 58.028740         | 98.023654          | 49.515465         |                    |                   | N    |                    |                   |                    |                   |                    |                   | 18 |
| 2  | 212.102967         | 106.555121        | 195.076418         | 98.041847         |                    |                   | P    | 1876.987553        | 938.997415        | 1859.961004        | 930.484140        | 1858.976988        | 929.992132        | 17 |
| 3  | <b>311.171381</b>  | 156.089328        | <b>294.144832</b>  | 147.576054        |                    |                   | V    | <b>1779.934789</b> | <b>890.471033</b> | 1762.908240        | 881.957758        | <b>1761.924224</b> | 881.465750        | 16 |
| 4  | <b>424.255445</b>  | 212.631361        | <b>407.228896</b>  | 204.118086        |                    |                   | L    | <b>1680.866375</b> | <b>840.936826</b> | <b>1663.839826</b> | <b>832.423551</b> | 1662.855810        | 831.931543        | 15 |
| 5  | <b>552.314023</b>  | 276.660650        | <b>535.287474</b>  | 268.147375        |                    |                   | Q    | <b>1567.782311</b> | 784.394794        | <b>1550.755762</b> | <b>775.881519</b> | 1549.771746        | 775.389511        | 14 |
| 6  | <b>680.372601</b>  | 340.689939        | <b>663.346052</b>  | 332.176664        |                    |                   | Q    | <b>1439.723733</b> | 720.365505        | <b>1422.697184</b> | <b>711.852230</b> | 1421.713168        | <b>711.360222</b> | 13 |
| 7  | <b>795.399544</b>  | 398.203410        | 778.372995         | 389.690136        | 777.388979         | 389.198128        | D    | <b>1311.665155</b> | 656.336215        | <b>1294.638606</b> | 647.822941        | 1293.654590        | 647.330933        | 12 |
| 8  | <b>866.436658</b>  | 433.721967        | 849.410109         | <b>425.208693</b> | 848.426093         | <b>424.716685</b> | A    | <b>1196.638212</b> | 598.822744        | 1179.611663        | 590.309470        | <b>1178.627647</b> | 589.817462        | 11 |
| 9  | <b>1003.495570</b> | <b>502.251423</b> | 986.469021         | 493.738149        | <b>985.485005</b>  | 493.246141        | H    | <b>1125.601098</b> | <b>563.304187</b> | 1108.574549        | 554.790913        | 1107.590533        | 554.298905        | 10 |
| 10 | <b>1090.527598</b> | 545.767437        | <b>1073.501049</b> | 537.254163        | <b>1072.517033</b> | <b>536.762155</b> | S    | <b>988.542186</b>  | 494.774731        | 971.515637         | 486.261457        | 970.531621         | 485.769449        | 9  |
| 11 | <b>1177.559626</b> | 589.283451        | <b>1160.533077</b> | 580.770177        | 1159.549061        | 580.278169        | S    | <b>901.510158</b>  | 451.258717        | 884.483609         | 442.745443        | 883.499593         | 442.253435        | 8  |
| 12 | <b>1276.628040</b> | 638.817658        | <b>1259.601491</b> | 630.304384        | <b>1258.617475</b> | 629.812376        | V    | <b>814.478130</b>  | <b>407.742703</b> | 797.451581         | 399.229428        | 796.467565         | 398.737420        | 7  |
| 13 | <b>1377.675719</b> | 689.341498        | <b>1360.649170</b> | <b>680.828223</b> | <b>1359.665154</b> | <b>680.336215</b> | T    | <b>715.409716</b>  | 358.208496        | 698.383167         | 349.695221        | 697.399151         | 349.203213        | 6  |
| 14 | <b>1490.759783</b> | 745.883530        | <b>1473.733234</b> | 737.370255        | <b>1472.749218</b> | 736.878247        | I    | <b>614.362037</b>  | 307.684656        | 597.335488         | 299.171382        | 596.351472         | 298.679374        | 5  |
| 15 | <b>1591.807462</b> | 796.407369        | <b>1574.780913</b> | 787.894095        | <b>1573.796897</b> | 787.402087        | T    | <b>501.277973</b>  | 251.142624        | <b>484.251424</b>  | 242.629350        | 483.267408         | 242.137342        | 4  |
| 16 | <b>1688.860226</b> | 844.933751        | <b>1671.833677</b> | 836.420477        | 1670.849661        | 835.928469        | P    | <b>400.230294</b>  | 200.618785        | <b>383.203745</b>  | 192.105510        |                    |                   | 3  |
| 17 | <b>1816.918804</b> | 908.963040        | 1799.892255        | 900.449766        | 1798.908239        | 899.957758        | Q    | 303.177530         | 152.092403        | 286.150981         | 143.579128        |                    |                   | 2  |
| 18 |                    |                   |                    |                   |                    |                   | R    | 175.118952         | 88.063114         | 158.092403         | 79.549839         |                    |                   | 1  |

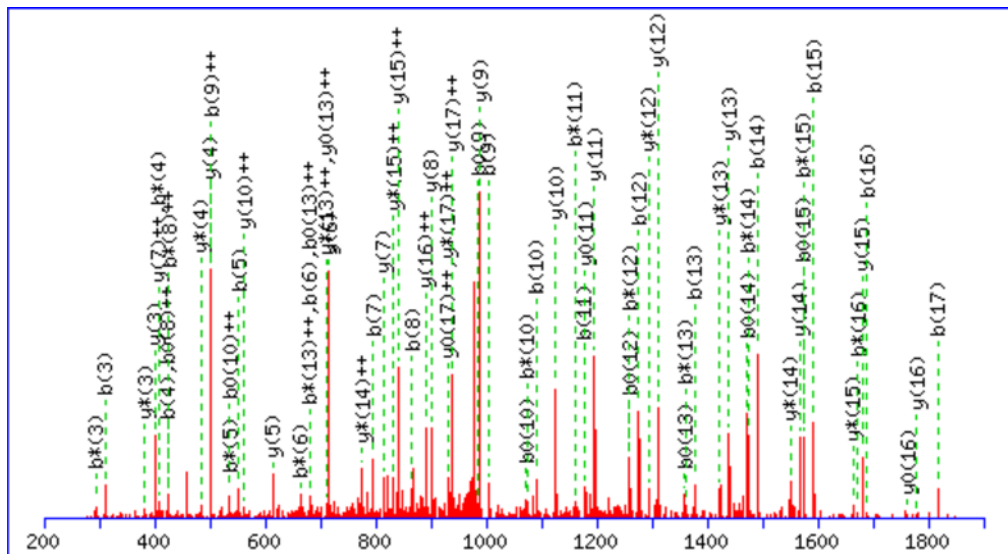

## Peptide View

MS/MS Fragmentation of **GLYDVVSVLR**

Found in **IPI00796189**, Tax\_Id=9606 Gene\_Symbol=ICOSLG Putative uncharacterized protein ICOSLG

**Experiment:** 44 - OPE-2 **Fraction:** OPE-2

Match to Query 5770: 1119.628848 from(560.821700,2+)

Title: OECHL100312\_38.18856.18856.2.dta

Data file \\Boromir\masse\Data LTQ-Orbitrap\Chrystelle Lacroix\Etude clinique sJPU\OECHL100312\_38.raw

**Monoisotopic mass of neutral peptide Mr(calc):** 1119.628815 **Fixed modifications:** Carbamidomethyl (C) (apply to specified residues or termini only) **Ions Score:** 77

**Expect:** 1e-006 **Matches :** 15/78 fragment ions using 18 most intense peaks ([help](#))

| # | b                 | b <sup>++</sup> | b <sup>0</sup> | b <sup>0++</sup> | Seq.     | y                 | y <sup>++</sup> | y*          | y* <sup>++</sup> | y <sup>0</sup> | y <sup>0++</sup> | #         |
|---|-------------------|-----------------|----------------|------------------|----------|-------------------|-----------------|-------------|------------------|----------------|------------------|-----------|
| 1 | 58.028740         | 29.518008       |                |                  | <b>G</b> |                   |                 |             |                  |                |                  | <b>10</b> |
| 2 | <b>171.112804</b> | 86.060040       |                |                  | <b>L</b> | 1063.614622       | 532.310949      | 1046.588073 | 523.797675       | 1045.604057    | 523.305667       | <b>9</b>  |
| 3 | <b>334.176133</b> | 167.591704      |                |                  | <b>Y</b> | <b>950.530558</b> | 475.768917      | 933.504009  | 467.255642       | 932.519993     | 466.763634       | <b>8</b>  |
| 4 | 449.203076        | 225.105176      | 431.192511     | 216.099894       | <b>D</b> | <b>787.467229</b> | 394.237253      | 770.440680  | 385.723978       | 769.456664     | 385.231970       | <b>7</b>  |
| 5 | <b>548.271490</b> | 274.639383      | 530.260925     | 265.634101       | <b>V</b> | <b>672.440286</b> | 336.723781      | 655.413737  | 328.210507       | 654.429721     | 327.718499       | <b>6</b>  |
| 6 | <b>647.339904</b> | 324.173590      | 629.329339     | 315.168308       | <b>V</b> | <b>573.371872</b> | 287.189574      | 556.345323  | 278.676299       | 555.361307     | 278.184291       | <b>5</b>  |

|    |                   |            |            |            |   |                   |            |            |            |            |            |   |
|----|-------------------|------------|------------|------------|---|-------------------|------------|------------|------------|------------|------------|---|
| 7  | <b>734.371932</b> | 367.689604 | 716.361367 | 358.684322 | S | <b>474.303458</b> | 237.655367 | 457.276909 | 229.142092 | 456.292893 | 228.650084 | 4 |
| 8  | <b>833.440346</b> | 417.223811 | 815.429781 | 408.218528 | V | <b>387.271430</b> | 194.139353 | 370.244881 | 185.626078 |            |            | 3 |
| 9  | <b>946.524410</b> | 473.765843 | 928.513845 | 464.760561 | L | <b>288.203016</b> | 144.605146 | 271.176467 | 136.091871 |            |            | 2 |
| 10 |                   |            |            |            | R | <b>175.118952</b> | 88.063114  | 158.092403 | 79.549839  |            |            | 1 |

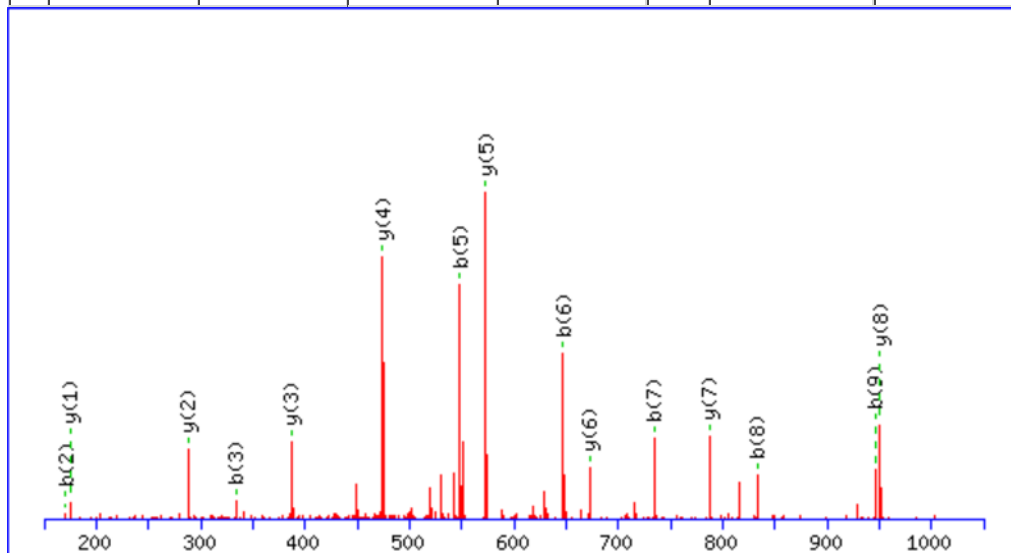

## Peptide View

MS/MS Fragmentation of **EVQLVESGGGLVKGK**

Found in **IPI00783024**, Tax\_Id=9606 Gene\_Symbol=- Myosin-reactive immunoglobulin heavy chain variable region (Fragment)

**Experiment:** 44 - OPE-2 **Fraction:** OPE-2

Match to Query 14490: 1881.033848 from(941.524200,2+)

Title: OECHL100312\_38.13957.13957.2.dta

Data file \\Boromir\masse\Data LTQ-Orbitrap\Chrystelle Lacroix\Etude clinique sJPU\OECHL100312\_38.raw

**Monoisotopic mass of neutral peptide Mr(calc):** 1881.031982 **Fixed modifications:** Carbamidomethyl (C) (apply to specified residues or termini only) **Ions Score:** 78

**Expect:** 9.3e-007 **Matches :** 14/208 fragment ions using 16 most intense peaks ([help](#))

| # | b          | b <sup>++</sup> | b <sup>*</sup> | b <sup>*++</sup> | b <sup>0</sup> | b <sup>0++</sup> | Seq. | y           | y <sup>++</sup> | y <sup>*</sup> | y <sup>*++</sup> | y <sup>0</sup> | y <sup>0++</sup> | #  |
|---|------------|-----------------|----------------|------------------|----------------|------------------|------|-------------|-----------------|----------------|------------------|----------------|------------------|----|
| 1 | 130.049869 | 65.528572       |                |                  | 112.039304     | 56.523290        | E    |             |                 |                |                  |                |                  | 19 |
| 2 | 229.118283 | 115.062780      |                |                  | 211.107718     | 106.057497       | V    | 1752.996660 | 877.001968      | 1735.970111    | 868.488694       | 1734.986095    | 867.996686       | 18 |

|    |             |            |             |            |             |            |   |             |            |             |            |             |            |    |
|----|-------------|------------|-------------|------------|-------------|------------|---|-------------|------------|-------------|------------|-------------|------------|----|
| 3  | 357.176861  | 179.092069 | 340.150312  | 170.578794 | 339.166296  | 170.086786 | Q | 1653.928246 | 827.467761 | 1636.901697 | 818.954487 | 1635.917681 | 818.462479 | 17 |
| 4  | 470.260925  | 235.634101 | 453.234376  | 227.120826 | 452.250360  | 226.628818 | L | 1525.869668 | 763.438472 | 1508.843119 | 754.925198 | 1507.859103 | 754.433190 | 16 |
| 5  | 569.329339  | 285.168308 | 552.302790  | 276.655033 | 551.318774  | 276.163025 | V | 1412.785604 | 706.896440 | 1395.759055 | 698.383166 | 1394.775039 | 697.891158 | 15 |
| 6  | 698.371932  | 349.689604 | 681.345383  | 341.176330 | 680.361367  | 340.684322 | E | 1313.717190 | 657.362233 | 1296.690641 | 648.848959 | 1295.706625 | 648.356951 | 14 |
| 7  | 785.403960  | 393.205618 | 768.377411  | 384.692344 | 767.393395  | 384.200336 | S | 1184.674597 | 592.840937 | 1167.648048 | 584.327662 | 1166.664032 | 583.835654 | 13 |
| 8  | 842.425424  | 421.716350 | 825.398875  | 413.203076 | 824.414859  | 412.711068 | G | 1097.642569 | 549.324923 | 1080.616020 | 540.811648 | 1079.632004 | 540.319640 | 12 |
| 9  | 899.446888  | 450.227082 | 882.420339  | 441.713808 | 881.436323  | 441.221800 | G | 1040.621105 | 520.814191 | 1023.594556 | 512.300916 | 1022.610540 | 511.808908 | 11 |
| 10 | 956.468352  | 478.737814 | 939.441803  | 470.224540 | 938.457787  | 469.732532 | G | 983.599641  | 492.303459 | 966.573092  | 483.790184 | 965.589076  | 483.298176 | 10 |
| 11 | 1069.552416 | 535.279846 | 1052.525867 | 526.766572 | 1051.541851 | 526.274564 | L | 926.578177  | 463.792727 | 909.551628  | 455.279452 | 908.567612  | 454.787444 | 9  |
| 12 | 1168.620830 | 584.814053 | 1151.594281 | 576.300779 | 1150.610265 | 575.808771 | V | 813.494113  | 407.250695 | 796.467564  | 398.737420 | 795.483548  | 398.245412 | 8  |
| 13 | 1296.715793 | 648.861535 | 1279.689244 | 640.348260 | 1278.705228 | 639.856252 | K | 714.425699  | 357.716487 | 697.399150  | 349.203213 | 696.415134  | 348.711205 | 7  |
| 14 | 1393.768557 | 697.387917 | 1376.742008 | 688.874642 | 1375.757992 | 688.382634 | P | 586.330736  | 293.669006 | 569.304187  | 285.155731 | 568.320171  | 284.663723 | 6  |
| 15 | 1450.790021 | 725.898649 | 1433.763472 | 717.385374 | 1432.779456 | 716.893366 | G | 489.277972  | 245.142624 | 472.251423  | 236.629349 | 471.267407  | 236.137341 | 5  |
| 16 | 1507.811485 | 754.409381 | 1490.784936 | 745.896106 | 1489.800920 | 745.404098 | G | 432.256508  | 216.631892 | 415.229959  | 208.118617 | 414.245943  | 207.626609 | 4  |
| 17 | 1594.843513 | 797.925395 | 1577.816964 | 789.412120 | 1576.832948 | 788.920112 | S | 375.235044  | 188.121160 | 358.208495  | 179.607885 | 357.224479  | 179.115877 | 3  |
| 18 | 1707.927577 | 854.467427 | 1690.901028 | 845.954152 | 1689.917012 | 845.462144 | L | 288.203016  | 144.605146 | 271.176467  | 136.091871 |             |            | 2  |
| 19 |             |            |             |            |             |            | R | 175.118952  | 88.063114  | 158.092403  | 79.549839  |             |            | 1  |

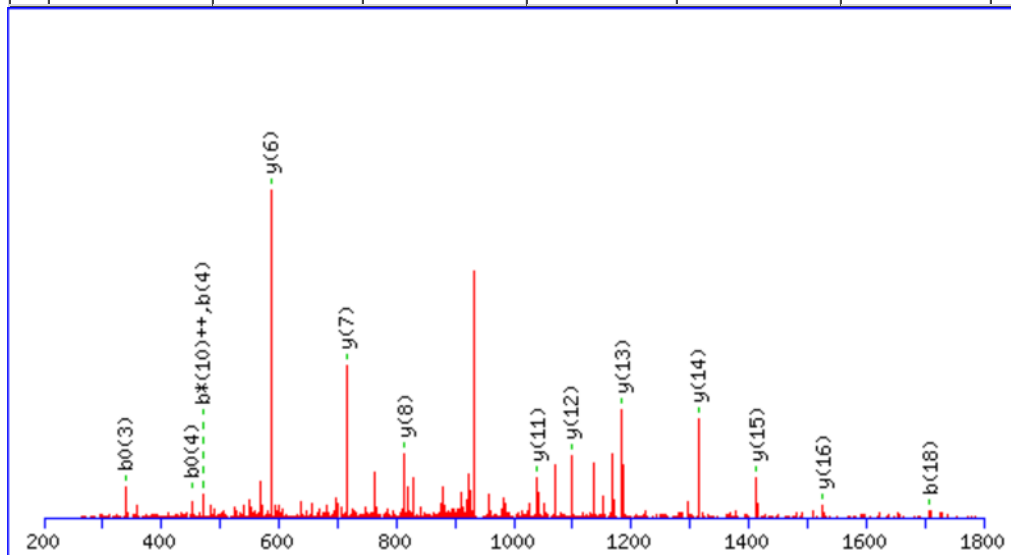



## Peptide View

MS/MS Fragmentation of **TVAGPVGGSLSVQCPYEKEHR**

Found in **IP100414784**, Tax\_Id=9606 Gene\_Symbol=CD300A Isoform 1 of CMRF35-like molecule 8

**Experiment:** 44 - OPE-2 **Fraction:** OPE-2

Match to Query 16280: 2270.111448 from(1136.063000,2+)

Title: OECHL100312\_38.10845.10845.2.dta

Data file \\Boromir\masse\Data LTQ-Orbitrap\Chrystelle Lacroix\Etude clinique sJPU\OECHL100312\_38.raw

**Monoisotopic mass of neutral peptide Mr(calc):** 2270.111374**Fixed modifications:** Carbamidomethyl (C) (apply to specified residues or termini only)**Ions Score:** 112

**Expect:** 1.2e-009**Matches :** 25/212 fragment ions using 34 most intense peaks ([help](#))

| #  | b           | b <sup>++</sup> | b*          | b <sup>*++</sup> | b <sup>0</sup> | b <sup>0++</sup> | Seq. | y           | y <sup>++</sup> | y*          | y <sup>*++</sup> | y <sup>0</sup> | y <sup>0++</sup> |
|----|-------------|-----------------|-------------|------------------|----------------|------------------|------|-------------|-----------------|-------------|------------------|----------------|------------------|
| 1  | 102.054955  | 51.531116       |             |                  | 84.044390      | 42.525833        | T    |             |                 |             |                  |                |                  |
| 2  | 201.123369  | 101.065322      |             |                  | 183.112804     | 92.060040        | V    | 2170.070965 | 1085.539120     | 2153.044416 | 1077.025846      | 2152.060400    | 1076.5338        |
| 3  | 272.160483  | 136.583879      |             |                  | 254.149918     | 127.578597       | A    | 2071.002551 | 1036.004913     | 2053.976002 | 1027.491639      | 2052.991986    | 1026.9996        |
| 4  | 329.181947  | 165.094611      |             |                  | 311.171382     | 156.089329       | G    | 1999.965437 | 1000.486357     | 1982.938888 | 991.973082       | 1981.954872    | 991.4810         |
| 5  | 426.234711  | 213.620994      |             |                  | 408.224146     | 204.615711       | P    | 1942.943973 | 971.975625      | 1925.917424 | 963.462350       | 1924.933408    | 962.9703         |
| 6  | 525.303125  | 263.155201      |             |                  | 507.292560     | 254.149918       | V    | 1845.891209 | 923.449243      | 1828.864660 | 914.935968       | 1827.880644    | 914.4439         |
| 7  | 582.324589  | 291.665933      |             |                  | 564.314024     | 282.660650       | G    | 1746.822795 | 873.915036      | 1729.796246 | 865.401761       | 1728.812230    | 864.9097         |
| 8  | 639.346053  | 320.176665      |             |                  | 621.335488     | 311.171382       | G    | 1689.801331 | 845.404304      | 1672.774782 | 836.891029       | 1671.790766    | 836.3990         |
| 9  | 726.378081  | 363.692679      |             |                  | 708.367516     | 354.687396       | S    | 1632.779867 | 816.893572      | 1615.753318 | 808.380297       | 1614.769302    | 807.8882         |
| 10 | 839.462145  | 420.234711      |             |                  | 821.451580     | 411.229428       | L    | 1545.747839 | 773.377558      | 1528.721290 | 764.864283       | 1527.737274    | 764.3722         |
| 11 | 926.494173  | 463.750725      |             |                  | 908.483608     | 454.745442       | S    | 1432.663775 | 716.835526      | 1415.637226 | 708.322251       | 1414.653210    | 707.8302         |
| 12 | 1025.562587 | 513.284932      |             |                  | 1007.552022    | 504.279649       | V    | 1345.631747 | 673.319512      | 1328.605198 | 664.806237       | 1327.621182    | 664.3142         |
| 13 | 1153.621165 | 577.314221      | 1136.594616 | 568.800946       | 1135.610600    | 568.308938       | Q    | 1246.563333 | 623.785305      | 1229.536784 | 615.272030       | 1228.552768    | 614.7800         |
| 14 | 1313.651814 | 657.329545      | 1296.625265 | 648.816271       | 1295.641249    | 648.324263       | C    | 1118.504755 | 559.756016      | 1101.478206 | 551.242741       | 1100.494190    | 550.7507         |
| 15 | 1410.704578 | 705.855927      | 1393.678029 | 697.342653       | 1392.694013    | 696.850645       | P    | 958.474106  | 479.740691      | 941.447557  | 471.227417       | 940.463541     | 470.7354         |
| 16 | 1573.767907 | 787.387592      | 1556.741358 | 778.874317       | 1555.757342    | 778.382309       | Y    | 861.421342  | 431.214309      | 844.394793  | 422.701035       | 843.410777     | 422.2090         |
| 17 | 1702.810500 | 851.908888      | 1685.783951 | 843.395614       | 1684.799935    | 842.903606       | E    | 698.358013  | 349.682645      | 681.331464  | 341.169370       | 680.347448     | 340.6773         |
| 18 | 1830.905463 | 915.956370      | 1813.878914 | 907.443095       | 1812.894898    | 906.951087       | K    | 569.315420  | 285.161348      | 552.288871  | 276.648074       | 551.304855     | 276.1560         |
| 19 | 1959.948056 | 980.477666      | 1942.921507 | 971.964392       | 1941.937491    | 971.472384       | E    | 441.220457  | 221.113867      | 424.193908  | 212.600592       | 423.209892     | 212.1085         |

|    |             |             |             |             |             |             |   |            |            |            |            |  |  |
|----|-------------|-------------|-------------|-------------|-------------|-------------|---|------------|------------|------------|------------|--|--|
| 20 | 2097.006968 | 1049.007122 | 2079.980419 | 1040.493847 | 2078.996403 | 1040.001840 | H | 312.177864 | 156.592570 | 295.151315 | 148.079295 |  |  |
| 21 |             |             |             |             |             |             | R | 175.118952 | 88.063114  | 158.092403 | 79.549839  |  |  |

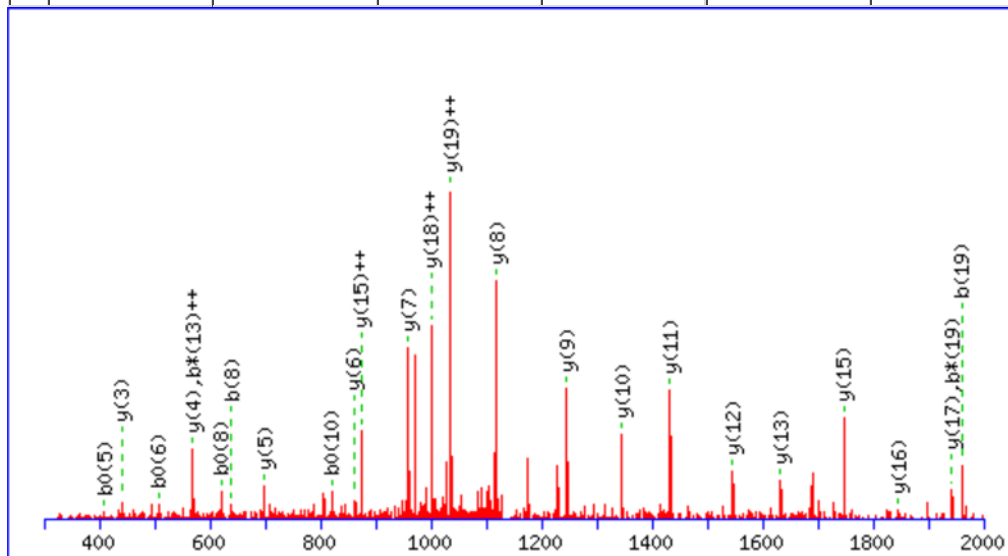

## Peptide View

MS/MS Fragmentation of **LLIYDASNLETGVPSR**

Found in **IPI00003111**, Tax\_Id=9606 Gene\_Symbol=LOC652694 Ig kappa chain V-I region AU

**Experiment:** 44 - OPE-2 **Fraction:** OPE-2

Match to Query 13534: 1746.916848 from(874.465700,2+)

Title: OECHL100312\_38.17241.17241.2.dta

Data file \\Borimir\masse\Data LTQ-Orbitrap\Chrystelle Lacroix\Etude clinique sJPU\OECHL100312\_38.raw

**Monoisotopic mass of neutral peptide Mr(calc):** 1746.915192 **Fixed modifications:** Carbamidomethyl (C) (apply to specified residues or termini only) **Ions Score:** 74

**Expect:** 4.4e-006 **Matches :** 31/156 fragment ions using 56 most intense peaks ([help](#))

| # | b                 | b <sup>++</sup> | b* | b <sup>*++</sup> | b <sup>0</sup> | b <sup>0++</sup> | Seq. | y                  | y <sup>++</sup>   | y*                 | y <sup>*++</sup> | y <sup>0</sup>     | y <sup>0++</sup> | #  |
|---|-------------------|-----------------|----|------------------|----------------|------------------|------|--------------------|-------------------|--------------------|------------------|--------------------|------------------|----|
| 1 | 114.091340        | 57.549308       |    |                  |                |                  | L    |                    |                   |                    |                  |                    |                  | 16 |
| 2 | 227.175404        | 114.091340      |    |                  |                |                  | L    | 1634.838427        | 817.922852        | 1617.811878        | 809.409577       | 1616.827862        | 808.917569       | 15 |
| 3 | <b>340.259468</b> | 170.633372      |    |                  |                |                  | I    | <b>1521.754363</b> | <b>761.380820</b> | 1504.727814        | 752.867545       | 1503.743798        | 752.375537       | 14 |
| 4 | 503.322797        | 252.165036      |    |                  |                |                  | Y    | 1408.670299        | <b>704.838788</b> | <b>1391.643750</b> | 696.325513       | <b>1390.659734</b> | 695.833505       | 13 |

|    |                    |                   |                    |            |                    |            |   |                    |            |                   |            |                   |            |           |
|----|--------------------|-------------------|--------------------|------------|--------------------|------------|---|--------------------|------------|-------------------|------------|-------------------|------------|-----------|
| 5  | 618.349740         | 309.678508        |                    |            | 600.339175         | 300.673226 | D | <b>1245.606970</b> | 623.307123 | 1228.580421       | 614.793849 | 1227.596405       | 614.301841 | <b>12</b> |
| 6  | 689.386854         | 345.197065        |                    |            | 671.376289         | 336.191782 | A | <b>1130.580027</b> | 565.793652 | 1113.553478       | 557.280377 | 1112.569462       | 556.788369 | <b>11</b> |
| 7  | <b>776.418882</b>  | 388.713079        |                    |            | 758.408317         | 379.707796 | S | <b>1059.542913</b> | 530.275095 | 1042.516364       | 521.761820 | 1041.532348       | 521.269812 | <b>10</b> |
| 8  | 890.461809         | 445.734542        | 873.435260         | 437.221268 | 872.451244         | 436.729260 | N | <b>972.510885</b>  | 486.759081 | 955.484336        | 478.245806 | 954.500320        | 477.753798 | <b>9</b>  |
| 9  | <b>1003.545873</b> | 502.276574        | <b>986.519324</b>  | 493.763300 | 985.535308         | 493.271292 | L | <b>858.467958</b>  | 429.737617 | 841.441409        | 421.224343 | 840.457393        | 420.732335 | <b>8</b>  |
| 10 | <b>1132.588466</b> | 566.797871        | 1115.561917        | 558.284597 | 1114.577901        | 557.792588 | E | <b>745.383894</b>  | 373.195585 | 728.357345        | 364.682311 | 727.373329        | 364.190303 | <b>7</b>  |
| 11 | <b>1233.636145</b> | <b>617.321710</b> | <b>1216.609596</b> | 608.808436 | 1215.625580        | 608.316428 | T | <b>616.341301</b>  | 308.674289 | 599.314752        | 300.161014 | 598.330736        | 299.669006 | <b>6</b>  |
| 12 | <b>1290.657609</b> | 645.832442        | 1273.631060        | 637.319168 | <b>1272.647044</b> | 636.827160 | G | <b>515.293622</b>  | 258.150449 | <b>498.267073</b> | 249.637175 | 497.283057        | 249.145167 | <b>5</b>  |
| 13 | <b>1389.726023</b> | 695.366649        | <b>1372.699474</b> | 686.853375 | 1371.715458        | 686.361367 | V | <b>458.272158</b>  | 229.639717 | 441.245609        | 221.126443 | 440.261593        | 220.634435 | <b>4</b>  |
| 14 | <b>1486.778787</b> | 743.893032        | 1469.752238        | 735.379757 | 1468.768222        | 734.887749 | P | <b>359.203744</b>  | 180.105510 | 342.177195        | 171.592236 | <b>341.193179</b> | 171.100228 | <b>3</b>  |
| 15 | <b>1573.810815</b> | 787.409046        | 1556.784266        | 778.895771 | 1555.800250        | 778.403763 | S | 262.150980         | 131.579128 | 245.124431        | 123.065854 | 244.140415        | 122.573846 | <b>2</b>  |
| 16 |                    |                   |                    |            |                    |            | R | 175.118952         | 88.063114  | 158.092403        | 79.549839  |                   |            | <b>1</b>  |

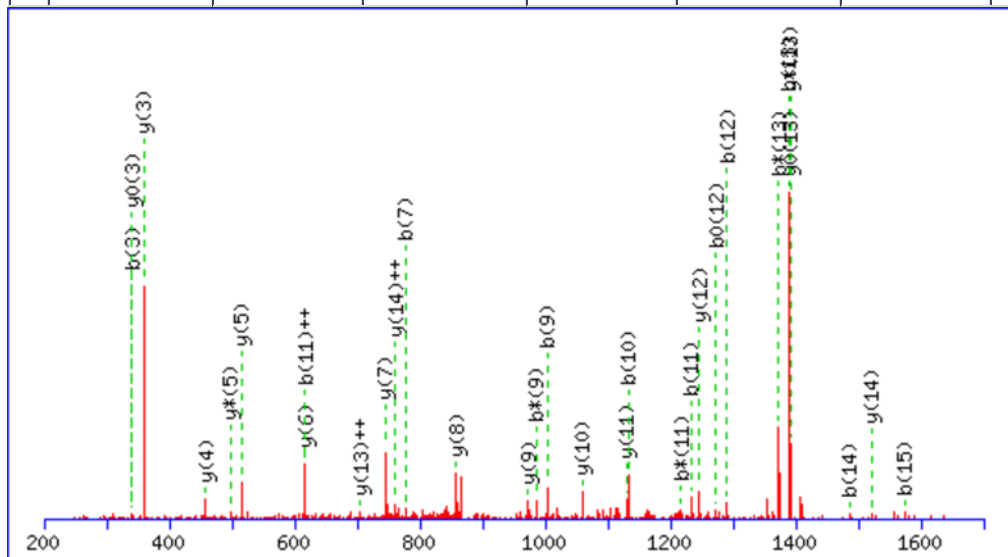

## Peptide View

MS/MS Fragmentation of **GQLPISVTCIADEIGAR**

Found in **IP100240345**, Tax\_Id=9606 Gene\_Symbol=CLEC14A C-type lectin domain family 14 member A

Experiment: 44 - OPE-2 Fraction: OPE-2

Match to Query 13931: 1798.926048 from(900.470300,2+)

Title: OECHL100312\_38.20003.20003.2.dta

Data file \\Boromir\masse\Data LTQ-Orbitrap\Chrystelle Lacroix\Etude clinique sJPU\OECHL100312\_38.raw

**Monoisotopic mass of neutral peptide Mr(calc):** 1798.924728**Fixed modifications:** Carbamidomethyl (C) (apply to specified residues or termini only)**Ions Score:** 82**Expect:** 8.5e-007**Matches :** 38/172 fragment ions using 85 most intense peaks ([help](#))

| #  | b                  | b <sup>++</sup> | b*                 | b <sup>+++</sup> | b <sup>0</sup>    | b <sup>0++</sup> | Seq. | y                  | y <sup>++</sup>   | y*                 | y <sup>+++</sup> | y <sup>0</sup> | y <sup>0++</sup> | #  |
|----|--------------------|-----------------|--------------------|------------------|-------------------|------------------|------|--------------------|-------------------|--------------------|------------------|----------------|------------------|----|
| 1  | 58.028740          | 29.518008       |                    |                  |                   |                  | G    |                    |                   |                    |                  |                |                  | 17 |
| 2  | 186.087318         | 93.547297       | 169.060769         | 85.034023        |                   |                  | Q    | 1742.910548        | 871.958912        | 1725.883999        | 863.445638       | 1724.899983    | 862.953630       | 16 |
| 3  | <b>299.171382</b>  | 150.089329      | 282.144833         | 141.576055       |                   |                  | L    | <b>1614.851970</b> | <b>807.929623</b> | 1597.825421        | 799.416349       | 1596.841405    | 798.924340       | 15 |
| 4  | <b>396.224146</b>  | 198.615711      | <b>379.197597</b>  | 190.102436       |                   |                  | P    | <b>1501.767906</b> | <b>751.387591</b> | 1484.741357        | 742.874317       | 1483.757341    | 742.382309       | 14 |
| 5  | <b>509.308210</b>  | 255.157743      | <b>492.281661</b>  | 246.644468       |                   |                  | I    | <b>1404.715142</b> | 702.861209        | 1387.688593        | 694.347935       | 1386.704577    | 693.855927       | 13 |
| 6  | <b>596.340238</b>  | 298.673757      | 579.313689         | 290.160483       | <b>578.329673</b> | 289.668475       | S    | <b>1291.631078</b> | 646.319177        | <b>1274.604529</b> | 637.805903       | 1273.620513    | 637.313895       | 12 |
| 7  | <b>695.408652</b>  | 348.207964      | 678.382103         | 339.694689       | 677.398087        | 339.202681       | V    | <b>1204.599050</b> | 602.803163        | 1187.572501        | 594.289889       | 1186.588485    | 593.797881       | 11 |
| 8  | <b>796.456331</b>  | 398.731804      | 779.429782         | 390.218529       | <b>778.445766</b> | 389.726521       | T    | <b>1105.530636</b> | 553.268956        | 1088.504087        | 544.755682       | 1087.520071    | 544.263674       | 10 |
| 9  | <b>956.486980</b>  | 478.747128      | 939.460431         | 470.233854       | 938.476415        | 469.741846       | C    | <b>1004.482957</b> | 502.745117        | 987.456408         | 494.231842       | 986.472392     | 493.739834       | 9  |
| 10 | <b>1069.571044</b> | 535.289160      | <b>1052.544495</b> | 526.775886       | 1051.560479       | 526.283878       | I    | <b>844.452308</b>  | <b>422.729792</b> | 827.425759         | 414.216518       | 826.441743     | 413.724510       | 8  |
| 11 | <b>1140.608158</b> | 570.807717      | 1123.581609        | 562.294443       | 1122.597593       | 561.802435       | A    | <b>731.368244</b>  | 366.187760        | 714.341695         | 357.674486       | 713.357679     | 357.182478       | 7  |
| 12 | <b>1255.635101</b> | 628.321189      | 1238.608552        | 619.807914       | 1237.624536       | 619.315906       | D    | <b>660.331130</b>  | 330.669203        | 643.304581         | 322.155929       | 642.320565     | 321.663921       | 6  |
| 13 | <b>1384.677694</b> | 692.842485      | <b>1367.651145</b> | 684.329211       | 1366.667129       | 683.837203       | E    | <b>545.304187</b>  | 273.155732        | 528.277638         | 264.642457       | 527.293622     | 264.150449       | 5  |
| 14 | <b>1497.761758</b> | 749.384517      | <b>1480.735209</b> | 740.871243       | 1479.751193       | 740.379235       | I    | <b>416.261594</b>  | 208.634435        | 399.235045         | 200.121160       |                |                  | 4  |
| 15 | <b>1554.783222</b> | 777.895249      | 1537.756673        | 769.381975       | 1536.772657       | 768.889967       | G    | <b>303.177530</b>  | 152.092403        | 286.150981         | 143.579128       |                |                  | 3  |
| 16 | <b>1625.820336</b> | 813.413806      | 1608.793787        | 804.900532       | 1607.809771       | 804.408524       | A    | 246.156066         | 123.581671        | 229.129517         | 115.068396       |                |                  | 2  |
| 17 |                    |                 |                    |                  |                   |                  | R    | 175.118952         | 88.063114         | 158.092403         | 79.549839        |                |                  | 1  |

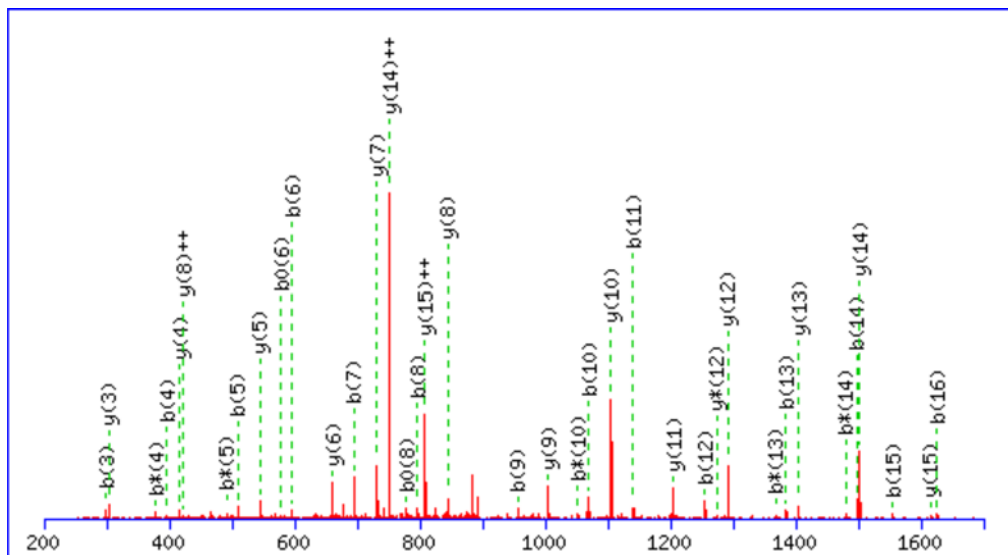

## Peptide View

MS/MS Fragmentation of **CQCPAGAALQADGR**

Found in **IPI00010737**, Tax\_Id=9606 Gene\_Symbol=THBD Thrombomodulin

**Experiment:** 44 - OPE-2 **Fraction:** OPE-2

Match to Query 10785: 1473.645648 from(737.830100,2+)

Title: OECHL100312\_38.7858.7858.2.dta

Data file \\Boromir\masse\Data LTQ-Orbitrap\Chrystelle Lacroix\Etude clinique sJPU\OECHL100312\_38.raw

**Monoisotopic mass of neutral peptide Mr(calc):** 1473.645279 **Fixed modifications:** Carbamidomethyl (C) (apply to specified residues or termini only) **Ions Score:** 63

**Expect:** 2.2e-005 **Matches :** 31/128 fragment ions using 65 most intense peaks ([help](#))

| # | b                 | b <sup>++</sup> | b*                | b* <sup>++</sup> | b <sup>0</sup> | b <sup>0++</sup> | Seq. | y                  | y <sup>++</sup>   | y*                 | y* <sup>++</sup> | y <sup>0</sup>    | y <sup>0++</sup> | #  |
|---|-------------------|-----------------|-------------------|------------------|----------------|------------------|------|--------------------|-------------------|--------------------|------------------|-------------------|------------------|----|
| 1 | 161.037925        | 81.022600       |                   |                  |                |                  | C    |                    |                   |                    |                  |                   |                  | 14 |
| 2 | <b>289.096503</b> | 145.051890      | <b>272.069954</b> | 136.538615       |                |                  | Q    | 1314.621912        | 657.814594        | 1297.595363        | 649.301320       | 1296.611347       | 648.809312       | 13 |
| 3 | <b>449.127152</b> | 225.067214      | <b>432.100603</b> | 216.553940       |                |                  | C    | <b>1186.563334</b> | <b>593.785305</b> | 1169.536785        | 585.272031       | 1168.552769       | 584.780023       | 12 |
| 4 | <b>546.179916</b> | 273.593596      | 529.153367        | 265.080322       |                |                  | P    | <b>1026.532685</b> | 513.769981        | <b>1009.506136</b> | 505.256706       | 1008.522120       | 504.764698       | 11 |
| 5 | <b>617.217030</b> | 309.112153      | 600.190481        | 300.598879       |                |                  | A    | <b>929.479921</b>  | 465.243599        | <b>912.453372</b>  | 456.730324       | <b>911.469356</b> | 456.238316       | 10 |
| 6 | <b>674.238494</b> | 337.622885      | 657.211945        | 329.109611       |                |                  | G    | <b>858.442807</b>  | 429.725042        | 841.416258         | 421.211767       | 840.432242        | 420.719759       | 9  |

|    |             |            |             |            |             |            |   |            |            |            |            |            |            |   |
|----|-------------|------------|-------------|------------|-------------|------------|---|------------|------------|------------|------------|------------|------------|---|
| 7  | 745.275608  | 373.141442 | 728.249059  | 364.628168 |             |            | A | 801.421343 | 401.214310 | 784.394794 | 392.701035 | 783.410778 | 392.209027 | 8 |
| 8  | 816.312722  | 408.659999 | 799.286173  | 400.146725 |             |            | A | 730.384229 | 365.695753 | 713.357680 | 357.182478 | 712.373664 | 356.690470 | 7 |
| 9  | 929.396786  | 465.202031 | 912.370237  | 456.688757 |             |            | L | 659.347115 | 330.177196 | 642.320566 | 321.663921 | 641.336550 | 321.171913 | 6 |
| 10 | 1057.455364 | 529.231320 | 1040.428815 | 520.718046 |             |            | Q | 546.263051 | 273.635164 | 529.236502 | 265.121889 | 528.252486 | 264.629881 | 5 |
| 11 | 1128.492478 | 564.749877 | 1111.465929 | 556.236603 |             |            | A | 418.204473 | 209.605874 | 401.177924 | 201.092600 | 400.193908 | 200.600592 | 4 |
| 12 | 1243.519421 | 622.263349 | 1226.492872 | 613.750074 | 1225.508856 | 613.258066 | D | 347.167359 | 174.087317 | 330.140810 | 165.574043 | 329.156794 | 165.082035 | 3 |
| 13 | 1300.540885 | 650.774081 | 1283.514336 | 642.260806 | 1282.530320 | 641.768798 | G | 232.140416 | 116.573846 | 215.113867 | 108.060571 |            |            | 2 |
| 14 |             |            |             |            |             |            | R | 175.118952 | 88.063114  | 158.092403 | 79.549839  |            |            | 1 |

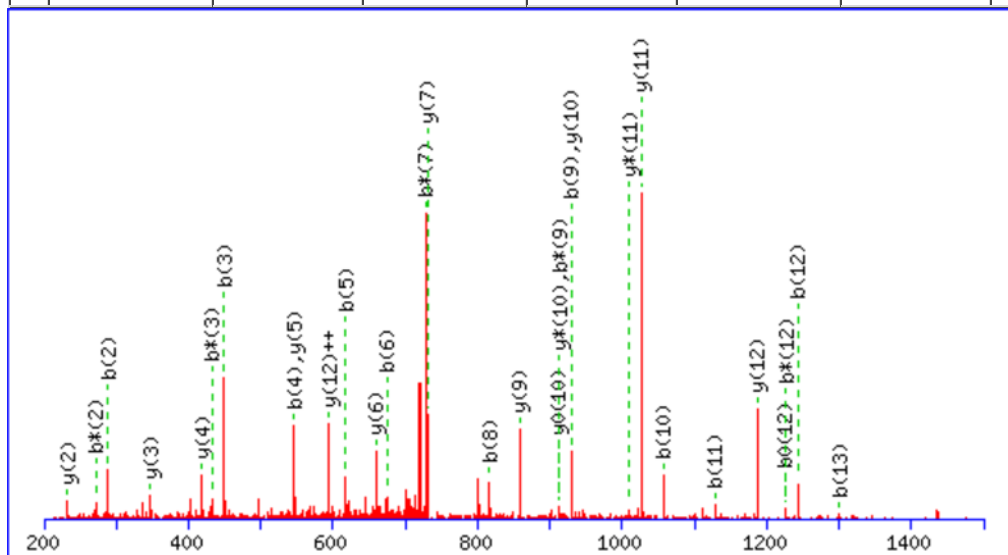

## Peptide View

MS/MS Fragmentation of **GLDTSLGAVQSDTGR**

Found in **IP100289931**, Tax\_Id=9606 Gene\_Symbol=MADCAM1 MADCAM1 protein

**Experiment:** 44 - OPE-2 **Fraction:** OPE-2

Match to Query 10814: 1475.722848 from(738.868700,2+)

Title: OECHL100312\_38.11659.11659.2.dta

Data file \\Boromir\masse\Data LTQ-Orbitrap\Chrystelle Lacroix\Etude clinique sJPU\OECHL100312\_38.raw

**Monoisotopic mass of neutral peptide Mr(calc):** 1475.721619 **Fixed modifications:** Carbamidomethyl (C) (apply to specified residues or termini only) **Ions Score:** 102

**Expect:** 9.8e-009**Matches :** 28/142 fragment ions using 37 most intense peaks ([help](#))

| #  | b                  | b <sup>++</sup> | b*          | b <sup>*++</sup> | b <sup>0</sup>    | b <sup>0++</sup> | Seq. | y                  | y <sup>++</sup> | y*          | y <sup>*++</sup>  | y <sup>0</sup> | y <sup>0++</sup>  | #  |
|----|--------------------|-----------------|-------------|------------------|-------------------|------------------|------|--------------------|-----------------|-------------|-------------------|----------------|-------------------|----|
| 1  | 58.028740          | 29.518008       |             |                  |                   |                  | G    |                    |                 |             |                   |                |                   | 15 |
| 2  | 171.112804         | 86.060040       |             |                  |                   |                  | L    | 1419.707414        | 710.357345      | 1402.680865 | 701.844071        | 1401.696849    | 701.352063        | 14 |
| 3  | <b>286.139747</b>  | 143.573512      |             |                  | 268.129182        | 134.568229       | D    | 1306.623350        | 653.815313      | 1289.596801 | 645.302039        | 1288.612785    | <b>644.810031</b> | 13 |
| 4  | <b>387.187426</b>  | 194.097351      |             |                  | 369.176861        | 185.092069       | T    | <b>1191.596407</b> | 596.301842      | 1174.569858 | <b>587.788567</b> | 1173.585842    | <b>587.296559</b> | 12 |
| 5  | <b>474.219454</b>  | 237.613365      |             |                  | <b>456.208889</b> | 228.608082       | S    | <b>1090.548728</b> | 545.778002      | 1073.522179 | 537.264728        | 1072.538163    | 536.772719        | 11 |
| 6  | <b>587.303518</b>  | 294.155397      |             |                  | <b>569.292953</b> | 285.150115       | L    | <b>1003.516700</b> | 502.261988      | 986.490151  | 493.748714        | 985.506135     | 493.256706        | 10 |
| 7  | <b>644.324982</b>  | 322.666129      |             |                  | 626.314417        | 313.660847       | G    | <b>890.432636</b>  | 445.719956      | 873.406087  | 437.206682        | 872.422071     | 436.714674        | 9  |
| 8  | <b>715.362096</b>  | 358.184686      |             |                  | <b>697.351531</b> | 349.179404       | A    | 833.411172         | 417.209224      | 816.384623  | 408.695950        | 815.400607     | 408.203942        | 8  |
| 9  | <b>814.430510</b>  | 407.718893      |             |                  | 796.419945        | 398.713611       | V    | <b>762.374058</b>  | 381.690667      | 745.347509  | 373.177393        | 744.363493     | 372.685385        | 7  |
| 10 | <b>942.489088</b>  | 471.748182      | 925.462539  | 463.234908       | 924.478523        | 462.742900       | Q    | <b>663.305644</b>  | 332.156460      | 646.279095  | 323.643186        | 645.295079     | 323.151178        | 6  |
| 11 | <b>1029.521116</b> | 515.264196      | 1012.494567 | 506.750922       | 1011.510551       | 506.258914       | S    | <b>535.247066</b>  | 268.127171      | 518.220517  | 259.613897        | 517.236501     | 259.121889        | 5  |
| 12 | <b>1144.548059</b> | 572.777668      | 1127.521510 | 564.264393       | 1126.537494       | 563.772385       | D    | <b>448.215038</b>  | 224.611157      | 431.188489  | 216.097882        | 430.204473     | 215.605874        | 4  |
| 13 | <b>1245.595738</b> | 623.301507      | 1228.569189 | 614.788233       | 1227.585173       | 614.296225       | T    | <b>333.188095</b>  | 167.097685      | 316.161546  | 158.584411        | 315.177530     | 158.092403        | 3  |
| 14 | <b>1302.617202</b> | 651.812239      | 1285.590653 | 643.298965       | 1284.606637       | 642.806957       | G    | <b>232.140416</b>  | 116.573846      | 215.113867  | 108.060571        |                |                   | 2  |
| 15 |                    |                 |             |                  |                   |                  | R    | 175.118952         | 88.063114       | 158.092403  | 79.549839         |                |                   | 1  |

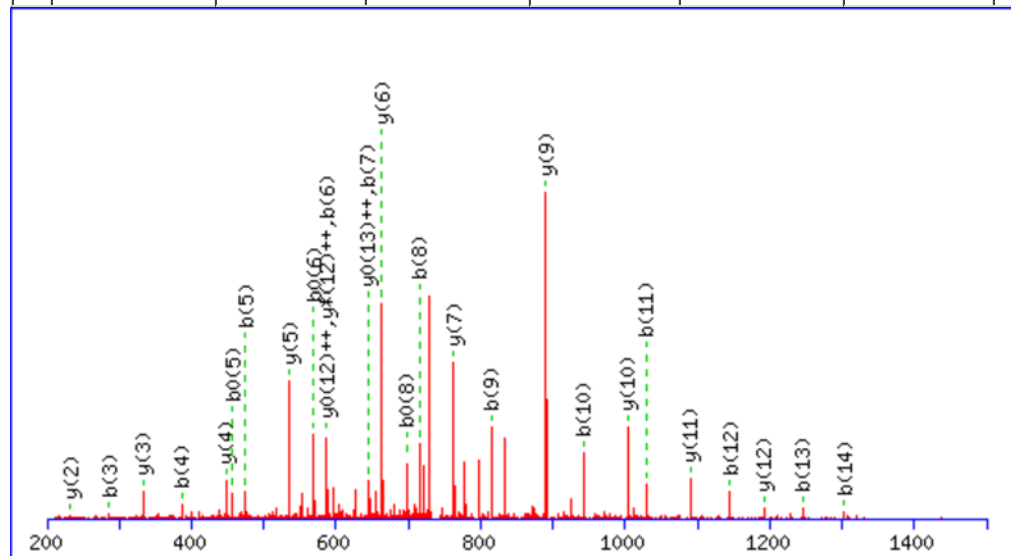

## Peptide View

MS/MS Fragmentation of **HSFKGEECPAGSHR**

Found in **IPI00021970**, Tax\_Id=9606 Gene\_Symbol=MGC31957;TNFRSF10C TNFRSF10C protein

**Experiment:** 44 - OPE-2 **Fraction:** OPE-2

Match to Query 12079: 1597.708248 from(799.861400,2+)

Title: OECHL100312\_38.2397.2397.2.dta

Data file \\Boromir\masse\Data LTQ-Orbitrap\Chrystelle Lacroix\Etude clinique sJPU\OECHL100312\_38.raw

**Monoisotopic mass of neutral peptide Mr(calc):** 1597.705566**Fixed modifications:** Carbamidomethyl (C) (apply to specified residues or termini only)**Ions Score:** 58

**Expect:** 0.0001**Matches :** 24/144 fragment ions using 40 most intense peaks ([help](#))

| #  | b                  | b <sup>++</sup> | b*          | b <sup>*++</sup> | b <sup>0</sup>    | b <sup>0++</sup> | Seq. | y                  | y <sup>++</sup>   | y*          | y <sup>*++</sup>  | y <sup>0</sup>     | y <sup>0++</sup>  | #  |
|----|--------------------|-----------------|-------------|------------------|-------------------|------------------|------|--------------------|-------------------|-------------|-------------------|--------------------|-------------------|----|
| 1  | 138.066188         | 69.536732       |             |                  |                   |                  | H    |                    |                   |             |                   |                    |                   | 14 |
| 2  | <b>225.098216</b>  | 113.052746      |             |                  | 207.087651        | 104.047463       | S    | <b>1461.653938</b> | <b>731.330607</b> | 1444.627389 | <b>722.817333</b> | <b>1443.643373</b> | <b>722.325325</b> | 13 |
| 3  | <b>372.166630</b>  | 186.586953      |             |                  | <b>354.156065</b> | 177.581671       | F    | <b>1374.621910</b> | <b>687.814593</b> | 1357.595361 | 679.301319        | 1356.611345        | 678.809311        | 12 |
| 4  | <b>500.261593</b>  | 250.634435      | 483.235044  | 242.121160       | <b>482.251028</b> | 241.629152       | K    | <b>1227.553496</b> | <b>614.280386</b> | 1210.526947 | 605.767112        | 1209.542931        | 605.275104        | 11 |
| 5  | 557.283057         | 279.145167      | 540.256508  | 270.631892       | 539.272492        | 270.139884       | G    | <b>1099.458533</b> | 550.232905        | 1082.431984 | 541.719630        | 1081.447968        | 541.227622        | 10 |
| 6  | <b>686.325650</b>  | 343.666463      | 669.299101  | 335.153189       | 668.315085        | 334.661181       | E    | 1042.437069        | 521.722173        | 1025.410520 | 513.208898        | 1024.426504        | 512.716890        | 9  |
| 7  | 815.368243         | 408.187760      | 798.341694  | 399.674485       | 797.357678        | 399.182477       | E    | <b>913.394476</b>  | 457.200876        | 896.367927  | 448.687602        | 895.383911         | 448.195594        | 8  |
| 8  | <b>975.398892</b>  | 488.203084      | 958.372343  | 479.689810       | 957.388327        | 479.197802       | C    | 784.351883         | 392.679580        | 767.325334  | 384.166305        | 766.341318         | 383.674297        | 7  |
| 9  | 1072.451656        | 536.729466      | 1055.425107 | 528.216192       | 1054.441091       | 527.724184       | P    | <b>624.321234</b>  | 312.664255        | 607.294685  | 304.150981        | 606.310669         | 303.658973        | 6  |
| 10 | <b>1143.488770</b> | 572.248023      | 1126.462221 | 563.734749       | 1125.478205       | 563.242741       | A    | 527.268470         | 264.137873        | 510.241921  | 255.624598        | 509.257905         | 255.132590        | 5  |
| 11 | <b>1200.510234</b> | 600.758755      | 1183.483685 | 592.245481       | 1182.499669       | 591.753473       | G    | <b>456.231356</b>  | 228.619316        | 439.204807  | 220.106041        | 438.220791         | 219.614033        | 4  |
| 12 | <b>1287.542262</b> | 644.274769      | 1270.515713 | 635.761495       | 1269.531697       | 635.269487       | S    | 399.209892         | 200.108584        | 382.183343  | 191.595309        | 381.199327         | 191.103301        | 3  |
| 13 | <b>1424.601174</b> | 712.804225      | 1407.574625 | 704.290951       | 1406.590609       | 703.798943       | H    | 312.177864         | 156.592570        | 295.151315  | 148.079295        |                    |                   | 2  |
| 14 |                    |                 |             |                  |                   |                  | R    | 175.118952         | 88.063114         | 158.092403  | 79.549839         |                    |                   | 1  |



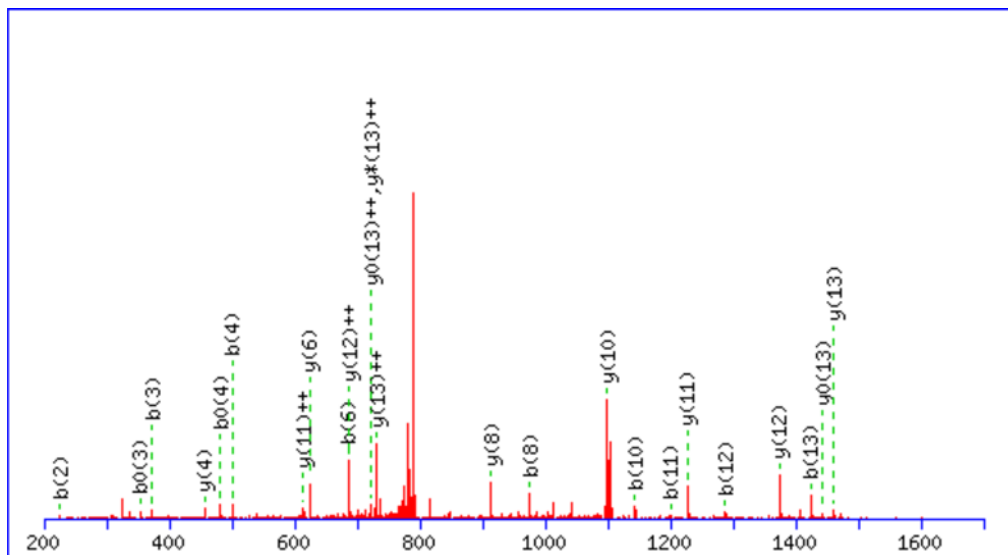

## Peptide View

MS/MS Fragmentation of **ATGDIKVTSEIK**

Found in **IPI00302614**, Tax\_Id=9606 Gene\_Symbol=VTCN1 V-set domain containing T cell activation inhibitor 1

**Experiment:** 44 - OPE-2 **Fraction:** OPE-2

Match to Query 9928: 1389.735048 from(695.874800,2+)

Title: OECHL100312\_38.8572.8572.2.dta

Data file \\Boromir\masse\Data LTQ-Orbitrap\Chrystelle Lacroix\Etude clinique sJPU\OECHL100312\_38.raw

**Monoisotopic mass of neutral peptide Mr(calc):** 1389.735107 **Fixed modifications:** Carbamidomethyl (C) (apply to specified residues or termini only) **Ions Score:** 61

**Expect:** 7.7e-005 **Matches :** 38/128 fragment ions using 56 most intense peaks ([help](#))

| # | b          | b <sup>++</sup> | b*         | b* <sup>++</sup> | b <sup>0</sup> | b <sup>0++</sup> | Seq. | y           | y <sup>++</sup> | y*          | y* <sup>++</sup> | y <sup>0</sup> | y <sup>0++</sup> | #  |
|---|------------|-----------------|------------|------------------|----------------|------------------|------|-------------|-----------------|-------------|------------------|----------------|------------------|----|
| 1 | 72.044390  | 36.525833       |            |                  |                |                  | A    |             |                 |             |                  |                |                  | 13 |
| 2 | 173.092069 | 87.049672       |            |                  | 155.081504     | 78.044390        | T    | 1319.705288 | 660.356282      | 1302.678739 | 651.843008       | 1301.694723    | 651.350999       | 12 |
| 3 | 230.113533 | 115.560404      |            |                  | 212.102968     | 106.555122       | G    | 1218.657609 | 609.832442      | 1201.631060 | 601.319168       | 1200.647044    | 600.827160       | 11 |
| 4 | 345.140476 | 173.073876      |            |                  | 327.129911     | 164.068593       | D    | 1161.636145 | 581.321710      | 1144.609596 | 572.808436       | 1143.625580    | 572.316428       | 10 |
| 5 | 458.224540 | 229.615908      |            |                  | 440.213975     | 220.610626       | I    | 1046.609202 | 523.808239      | 1029.582653 | 515.294964       | 1028.598637    | 514.802956       | 9  |
| 6 | 586.319503 | 293.663390      | 569.292954 | 285.150115       | 568.308938     | 284.658107       | K    | 933.525138  | 467.266207      | 916.498589  | 458.752932       | 915.514573     | 458.260924       | 8  |

|    |                    |                   |                    |                   |                    |                   |   |                   |            |                   |                   |                   |            |   |
|----|--------------------|-------------------|--------------------|-------------------|--------------------|-------------------|---|-------------------|------------|-------------------|-------------------|-------------------|------------|---|
| 7  | <b>685.387917</b>  | 343.197597        | 668.361368         | 334.684322        | 667.377352         | 334.192314        | V | <b>805.430175</b> | 403.218725 | <b>788.403626</b> | 394.705451        | <b>787.419610</b> | 394.213443 | 7 |
| 8  | <b>786.435596</b>  | 393.721436        | 769.409047         | 385.208162        | 768.425031         | 384.716154        | T | <b>706.361761</b> | 353.684518 | 689.335212        | <b>345.171244</b> | 688.351196        | 344.679236 | 6 |
| 9  | <b>915.478189</b>  | <b>458.242733</b> | 898.451640         | 449.729458        | <b>897.467624</b>  | 449.237450        | E | 605.314082        | 303.160679 | 588.287533        | 294.647404        | 587.303517        | 294.155396 | 5 |
| 10 | <b>1002.510217</b> | 501.758747        | 985.483668         | 493.245472        | 984.499652         | 492.753464        | S | <b>476.271489</b> | 238.639382 | 459.244940        | 230.126108        | <b>458.260924</b> | 229.634100 | 4 |
| 11 | <b>1131.552810</b> | 566.280043        | <b>1114.526261</b> | <b>557.766769</b> | <b>1113.542245</b> | <b>557.274760</b> | E | 389.239461        | 195.123368 | 372.212912        | 186.610094        | 371.228896        | 186.118086 | 3 |
| 12 | <b>1244.636874</b> | 622.822075        | 1227.610325        | 614.308800        | <b>1226.626309</b> | 613.816792        | I | <b>260.196868</b> | 130.602072 | <b>243.170319</b> | 122.088797        |                   |            | 2 |
| 13 |                    |                   |                    |                   |                    |                   | K | 147.112804        | 74.060040  | 130.086255        | 65.546765         |                   |            | 1 |

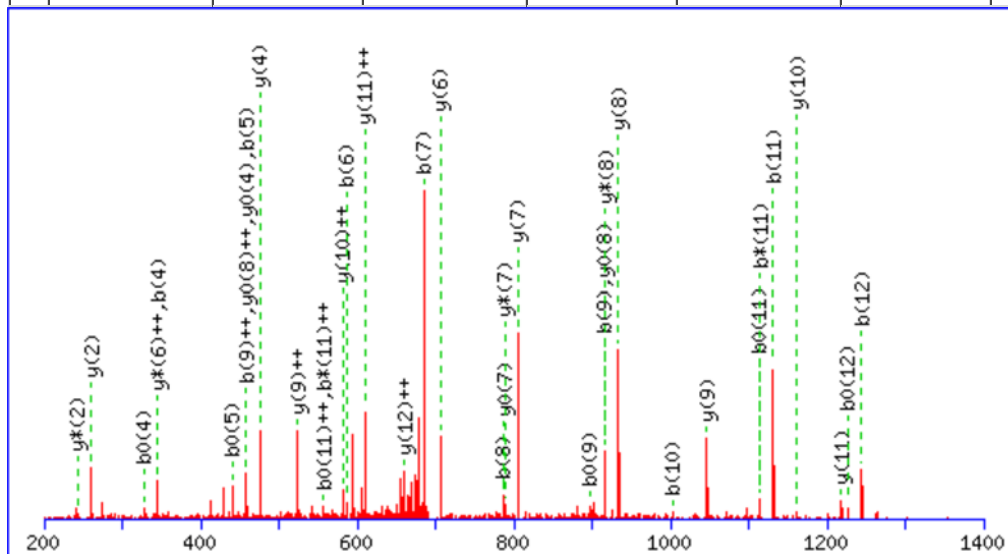

## Peptide View

MS/MS Fragmentation of **SKEDSNSTESKSSSEEDGQLK**

Found in **IPI00012734**, Tax\_Id=9606 Gene\_Symbol=DMP1 Isoform 1 of Dentin matrix acidic phosphoprotein 1

**Experiment:** 44 - OPE-2 **Fraction:** OPE-2

Match to Query 16287: 2271.000672 from(758.007500,3+)

Title: OECHL100312\_38.2390.2390.3.dta

Data file \\Boromir\masse\Data LTQ-Orbitrap\Chrystelle Lacroix\Etude clinique sJPU\OECHL100312\_38.raw

**Monoisotopic mass of neutral peptide Mr(calc):** 2270.998581 **Fixed modifications:** Carbamidomethyl (C) (apply to specified residues or termini only) **Ions Score:** 51

**Expect:** 0.00074 **Matches :** 45/230 fragment ions using 110 most intense peaks ([help](#))

| #  | <b>b</b>           | <b>b<sup>++</sup></b> | <b>b<sup>*</sup></b> | <b>b<sup>*++</sup></b> | <b>b<sup>0</sup></b> | <b>b<sup>0++</sup></b> | Seq.     | <b>y</b>           | <b>y<sup>++</sup></b> | <b>y<sup>*</sup></b> | <b>y<sup>*++</sup></b> | <b>y<sup>0</sup></b> | <b>y<sup>0++</sup></b> |
|----|--------------------|-----------------------|----------------------|------------------------|----------------------|------------------------|----------|--------------------|-----------------------|----------------------|------------------------|----------------------|------------------------|
| 1  | 88.039304          | 44.523290             |                      |                        | 70.028739            | 35.518008              | <b>S</b> |                    |                       |                      |                        |                      |                        |
| 2  | <b>216.134267</b>  | 108.570771            | 199.107718           | 100.057497             | 198.123702           | 99.565489              | <b>K</b> | 2184.973868        | 1092.990572           | 2167.947319          | 1084.477297            | 2166.963303          | 1083.9852              |
| 3  | <b>345.176860</b>  | 173.092068            | 328.150311           | 164.578793             | <b>327.166295</b>    | 164.086785             | <b>E</b> | 2056.878905        | <b>1028.943090</b>    | 2039.852356          | <b>1020.429816</b>     | 2038.868340          | <b>1019.9378</b>       |
| 4  | <b>460.203803</b>  | 230.605539            | 443.177254           | 222.092265             | 442.193238           | 221.600257             | <b>D</b> | 1927.836312        | <b>964.421794</b>     | 1910.809763          | <b>955.908520</b>      | 1909.825747          | 955.4165               |
| 5  | <b>547.235831</b>  | 274.121554            | 530.209282           | 265.608279             | 529.225266           | 265.116271             | <b>S</b> | 1812.809369        | <b>906.908323</b>     | 1795.782820          | 898.395048             | 1794.798804          | 897.9030               |
| 6  | 661.278758         | 331.143017            | 644.252209           | 322.629743             | 643.268193           | 322.137735             | <b>N</b> | 1725.777341        | <b>863.392309</b>     | 1708.750792          | 854.879034             | 1707.766776          | 854.3870               |
| 7  | 748.310786         | 374.659031            | 731.284237           | 366.145757             | 730.300221           | 365.653749             | <b>S</b> | 1611.734414        | <b>806.370845</b>     | 1594.707865          | 797.857571             | 1593.723849          | 797.3655               |
| 8  | 849.358465         | 425.182871            | 832.331916           | 416.669596             | 831.347900           | 416.177588             | <b>T</b> | <b>1524.702386</b> | 762.854831            | 1507.675837          | 754.341557             | 1506.691821          | 753.8495               |
| 9  | <b>978.401058</b>  | 489.704167            | 961.374509           | 481.190893             | 960.390493           | <b>480.698885</b>      | <b>E</b> | <b>1423.654707</b> | 712.330992            | 1406.628158          | 703.817717             | 1405.644142          | 703.3257               |
| 10 | 1065.433086        | 533.220181            | 1048.406537          | 524.706907             | 1047.422521          | 524.214899             | <b>S</b> | <b>1294.612114</b> | <b>647.809695</b>     | <b>1277.585565</b>   | 639.296421             | 1276.601549          | 638.8044               |
| 11 | <b>1193.528049</b> | <b>597.267663</b>     | 1176.501500          | <b>588.754388</b>      | 1175.517484          | 588.262380             | <b>K</b> | <b>1207.580086</b> | <b>604.293681</b>     | 1190.553537          | 595.780407             | 1189.569521          | 595.2883               |
| 12 | <b>1280.560077</b> | <b>640.783677</b>     | 1263.533528          | 632.270402             | 1262.549512          | 631.778394             | <b>S</b> | <b>1079.485123</b> | 540.246200            | 1062.458574          | 531.732925             | 1061.474558          | 531.2409               |
| 13 | <b>1367.592105</b> | <b>684.299691</b>     | <b>1350.565556</b>   | 675.786416             | 1349.581540          | 675.294408             | <b>S</b> | <b>992.453095</b>  | 496.730186            | 975.426546           | 488.216911             | 974.442530           | 487.7249               |
| 14 | 1454.624133        | 727.815705            | <b>1437.597584</b>   | 719.302430             | 1436.613568          | 718.810422             | <b>S</b> | <b>905.421067</b>  | 453.214172            | 888.394518           | 444.700897             | 887.410502           | 444.2088               |
| 15 | 1583.666726        | 792.337001            | 1566.640177          | 783.823727             | 1565.656161          | 783.331719             | <b>E</b> | <b>818.389039</b>  | 409.698158            | 801.362490           | 401.184883             | 800.378474           | 400.6928               |
| 16 | 1712.709319        | 856.858298            | 1695.682770          | 848.345023             | 1694.698754          | 847.853015             | <b>E</b> | <b>689.346446</b>  | <b>345.176861</b>     | 672.319897           | 336.663587             | 671.335881           | 336.1715               |
| 17 | 1827.736262        | <b>914.371769</b>     | 1810.709713          | <b>905.858495</b>      | 1809.725697          | <b>905.366487</b>      | <b>D</b> | <b>560.303853</b>  | 280.655565            | 543.277304           | 272.142290             | 542.293288           | 271.6502               |
| 18 | 1884.757726        | 942.882501            | 1867.731177          | 934.369227             | 1866.747161          | 933.877219             | <b>G</b> | <b>445.276910</b>  | 223.142093            | 428.250361           | 214.628818             |                      |                        |
| 19 | 2012.816304        | <b>1006.911790</b>    | 1995.789755          | 998.398516             | 1994.805739          | 997.906508             | <b>Q</b> | 388.255446         | 194.631361            | 371.228897           | 186.118087             |                      |                        |
| 20 | 2125.900368        | <b>1063.453822</b>    | 2108.873819          | 1054.940547            | 2107.889803          | 1054.448539            | <b>L</b> | <b>260.196868</b>  | 130.602072            | 243.170319           | 122.088798             |                      |                        |
| 21 |                    |                       |                      |                        |                      |                        | <b>K</b> | 147.112804         | 74.060040             | 130.086255           | 65.546765              |                      |                        |

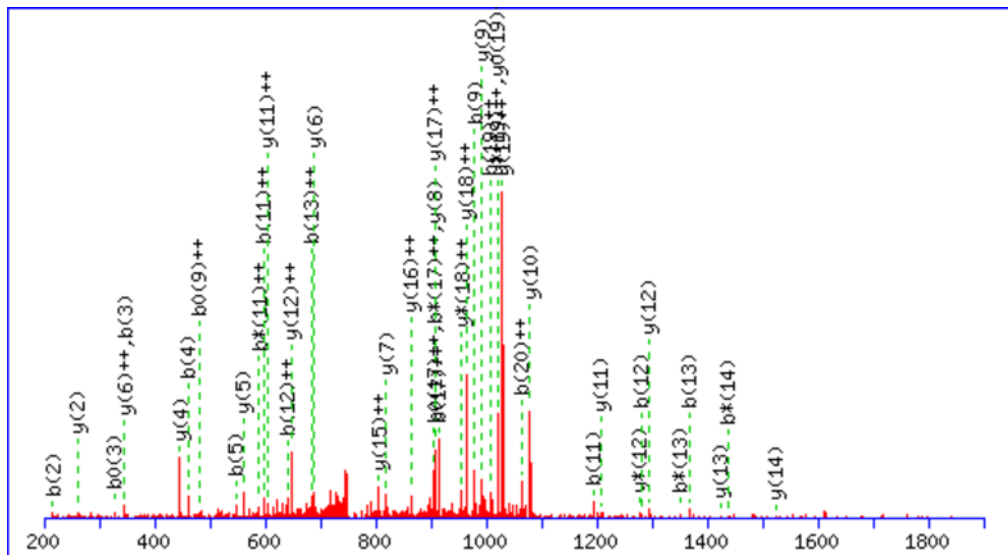

## Peptide View

MS/MS Fragmentation of **AADDTWEPFASGK**

Found in **IPI00022432**, Tax\_Id=9606 Gene\_Symbol=TTR Transthyretin

**Experiment:** 44 - OPE-2 **Fraction:** OPE-2

Match to Query 9952: 1393.616248 from(697.815400,2+)

Title: OECHL100312\_38.15347.15347.2.dta

Data file \\Boromir\masse\Data LTQ-Orbitrap\Chrystelle Lacroix\Etude clinique sJPU\OECHL100312\_38.raw

**Monoisotopic mass of neutral peptide Mr(calc):** 1393.615005 **Fixed modifications:** Carbamidomethyl (C) (apply to specified residues or termini only) **Ions Score:** 70

**Expect:** 6e-006 **Matches :** 20/112 fragment ions using 36 most intense peaks ([help](#))

| # | b                 | b <sup>++</sup> | b <sup>0</sup>    | b <sup>0++</sup> | Seq. | y                  | y <sup>++</sup> | y <sup>*</sup> | y <sup>*++</sup>  | y <sup>0</sup> | y <sup>0++</sup>  | #  |
|---|-------------------|-----------------|-------------------|------------------|------|--------------------|-----------------|----------------|-------------------|----------------|-------------------|----|
| 1 | 72.044390         | 36.525833       |                   |                  | A    |                    |                 |                |                   |                |                   | 13 |
| 2 | 143.081504        | 72.044390       |                   |                  | A    | 1323.585173        | 662.296225      | 1306.558624    | 653.782950        | 1305.574608    | 653.290942        | 12 |
| 3 | 258.108447        | 129.557862      | 240.097882        | 120.552579       | D    | <b>1252.548059</b> | 626.777668      | 1235.521510    | 618.264393        | 1234.537494    | 617.772385        | 11 |
| 4 | <b>373.135390</b> | 187.071333      | 355.124825        | 178.066051       | D    | <b>1137.521116</b> | 569.264196      | 1120.494567    | 560.750922        | 1119.510551    | 560.258914        | 10 |
| 5 | <b>474.183069</b> | 237.595173      | <b>456.172504</b> | 228.589890       | T    | <b>1022.494173</b> | 511.750725      | 1005.467624    | <b>503.237450</b> | 1004.483608    | <b>502.745442</b> | 9  |
| 6 | <b>660.262382</b> | 330.634829      | 642.251817        | 321.629547       | W    | <b>921.446494</b>  | 461.226885      | 904.419945     | 452.713611        | 903.435929     | 452.221603        | 8  |

|    |                    |            |                    |            |          |                   |            |            |            |            |            |          |
|----|--------------------|------------|--------------------|------------|----------|-------------------|------------|------------|------------|------------|------------|----------|
| 7  | <b>789.304975</b>  | 395.156126 | 771.294410         | 386.150843 | <b>E</b> | <b>735.367181</b> | 368.187229 | 718.340632 | 359.673954 | 717.356616 | 359.181946 | <b>7</b> |
| 8  | 886.357739         | 443.682508 | 868.347174         | 434.677225 | <b>P</b> | <b>606.324588</b> | 303.665932 | 589.298039 | 295.152658 | 588.314023 | 294.660650 | <b>6</b> |
| 9  | 1033.426153        | 517.216715 | 1015.415588        | 508.211432 | <b>F</b> | <b>509.271824</b> | 255.139550 | 492.245275 | 246.626275 | 491.261259 | 246.134267 | <b>5</b> |
| 10 | <b>1104.463267</b> | 552.735272 | <b>1086.452702</b> | 543.729989 | <b>A</b> | <b>362.203410</b> | 181.605343 | 345.176861 | 173.092068 | 344.192845 | 172.600060 | <b>4</b> |
| 11 | <b>1191.495295</b> | 596.251286 | 1173.484730        | 587.246003 | <b>S</b> | <b>291.166296</b> | 146.086786 | 274.139747 | 137.573512 | 273.155731 | 137.081504 | <b>3</b> |
| 12 | 1248.516759        | 624.762018 | 1230.506194        | 615.756735 | <b>G</b> | <b>204.134268</b> | 102.570772 | 187.107719 | 94.057497  |            |            | <b>2</b> |
| 13 |                    |            |                    |            | <b>K</b> | 147.112804        | 74.060040  | 130.086255 | 65.546765  |            |            | <b>1</b> |

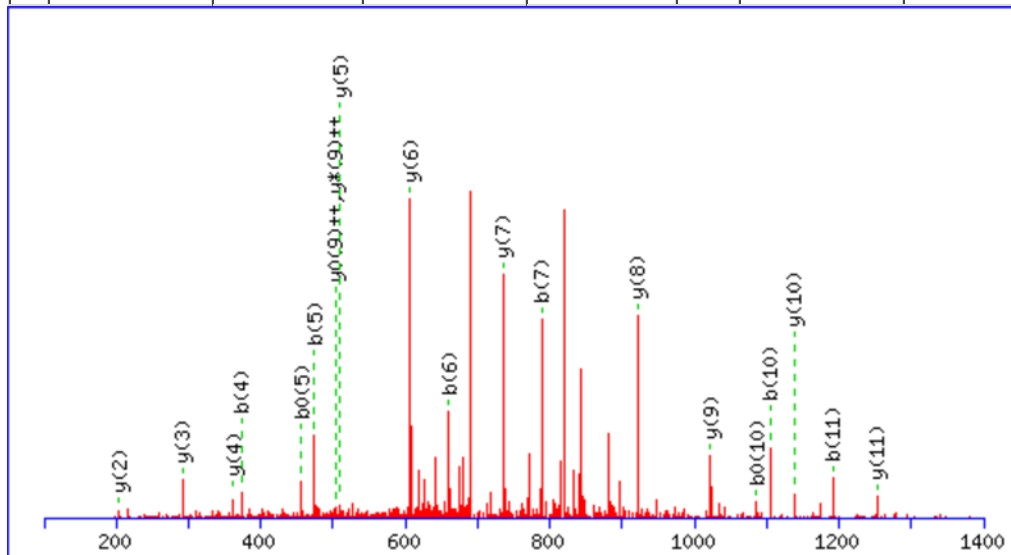

## Peptide View

MS/MS Fragmentation of **LYQQHGAGLFDVTR**

Found in **IPI00554538**, Tax\_Id=9606 Gene\_Symbol=TPP1 Putative uncharacterized protein TPP1

**Experiment:** 44 - OPE-2 **Fraction:** OPE-2

Match to Query 12136: 1603.810848 from(802.912700,2+)

Title: OECHL100312\_38.14002.14002.2.dta

Data file \\Boromir\masse\Data LTQ-Orbitrap\Chrystelle Lacroix\Etude clinique sJPU\OECHL100312\_38.raw

**Monoisotopic mass of neutral peptide Mr(calc):** 1603.810699 **Fixed modifications:** Carbamidomethyl (C) (apply to specified residues or termini only) **Ions Score:** 50

**Expect:** 0.0013 **Matches :** 23/130 fragment ions using 42 most intense peaks ([help](#))

| #  | b                  | b <sup>++</sup> | b*          | b <sup>*++</sup> | b <sup>0</sup> | b <sup>0++</sup>  | Seq. | y                  | y <sup>++</sup>   | y*                 | y <sup>*++</sup>  | y <sup>0</sup> | y <sup>0++</sup>  | #  |
|----|--------------------|-----------------|-------------|------------------|----------------|-------------------|------|--------------------|-------------------|--------------------|-------------------|----------------|-------------------|----|
| 1  | 114.091340         | 57.549308       |             |                  |                |                   | L    |                    |                   |                    |                   |                |                   | 14 |
| 2  | <b>277.154669</b>  | 139.080973      |             |                  |                |                   | Y    | 1491.733905        | 746.370591        | 1474.707356        | 737.857316        | 1473.723340    | 737.365308        | 13 |
| 3  | <b>405.213247</b>  | 203.110262      | 388.186698  | 194.596987       |                |                   | Q    | <b>1328.670576</b> | 664.838926        | 1311.644027        | <b>656.325652</b> | 1310.660011    | <b>655.833644</b> | 12 |
| 4  | 533.271825         | 267.139551      | 516.245276  | 258.626276       |                |                   | Q    | <b>1200.611998</b> | 600.809637        | <b>1183.585449</b> | <b>592.296363</b> | 1182.601433    | 591.804355        | 11 |
| 5  | <b>670.330737</b>  | 335.669007      | 653.304188  | 327.155732       |                |                   | H    | <b>1072.553420</b> | <b>536.780348</b> | 1055.526871        | 528.267074        | 1054.542855    | 527.775066        | 10 |
| 6  | 727.352201         | 364.179739      | 710.325652  | 355.666464       |                |                   | G    | <b>935.494508</b>  | 468.250892        | 918.467959         | 459.737618        | 917.483943     | 459.245610        | 9  |
| 7  | 798.389315         | 399.698296      | 781.362766  | 391.185021       |                |                   | A    | <b>878.473044</b>  | 439.740160        | 861.446495         | 431.226886        | 860.462479     | 430.734878        | 8  |
| 8  | 855.410779         | 428.209028      | 838.384230  | 419.695753       |                |                   | G    | 807.435930         | 404.221603        | 790.409381         | 395.708329        | 789.425365     | 395.216321        | 7  |
| 9  | <b>968.494843</b>  | 484.751060      | 951.468294  | 476.237785       |                |                   | L    | 750.414466         | <b>375.710871</b> | 733.387917         | 367.197597        | 732.403901     | 366.705589        | 6  |
| 10 | <b>1115.563257</b> | 558.285267      | 1098.536708 | 549.771992       |                |                   | F    | <b>637.330402</b>  | 319.168839        | 620.303853         | 310.655565        | 619.319837     | 310.163557        | 5  |
| 11 | <b>1230.590200</b> | 615.798738      | 1213.563651 | 607.285464       | 1212.579635    | 606.793456        | D    | <b>490.261988</b>  | 245.634632        | 473.235439         | 237.121358        | 472.251423     | 236.629350        | 4  |
| 12 | <b>1329.658614</b> | 665.332945      | 1312.632065 | 656.819671       | 1311.648049    | <b>656.327663</b> | V    | <b>375.235045</b>  | 188.121161        | 358.208496         | 179.607886        | 357.224480     | 179.115878        | 3  |
| 13 | <b>1430.706293</b> | 715.856785      | 1413.679744 | 707.343510       | 1412.695728    | 706.851502        | T    | 276.166631         | 138.586953        | 259.140082         | 130.073679        | 258.156066     | 129.581671        | 2  |
| 14 |                    |                 |             |                  |                |                   | R    | 175.118952         | 88.063114         | 158.092403         | 79.549839         |                |                   | 1  |

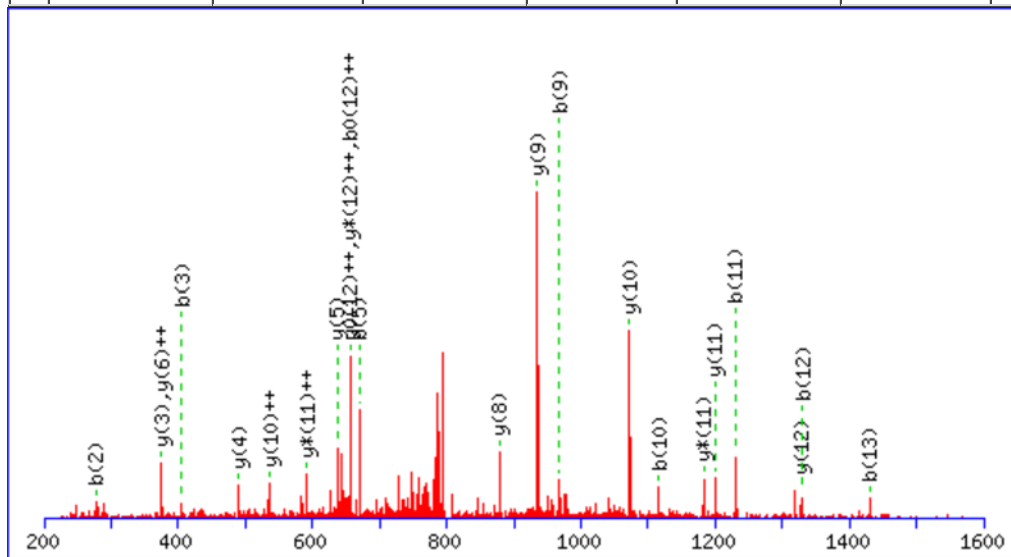

## Peptide View

MS/MS Fragmentation of **ASQILNAYLVR**Found in **IPI00289920**, Tax\_Id=9606 Gene\_Symbol=UPK3A Isoform 1 of Uroplakin-3a**Experiment:** 44 - OPE-2 **Fraction:** OPE-2

Match to Query 8252: 1246.702848 from(624.358700,2+)

Title: OECHL100312\_38.16268.16268.2.dta

Data file \\Boromir\masse\Data LTQ-Orbitrap\Chrystelle Lacroix\Etude clinique sJPU\OECHL100312\_38.raw

**Monoisotopic mass of neutral peptide Mr(calc):** 1246.703339**Fixed modifications:** Carbamidomethyl (C) (apply to specified residues or termini only)**Ions Score:** 51**Expect:** 0.00036**Matches :** 13/96 fragment ions using 22 most intense peaks ([help](#))

| #  | b                  | b <sup>++</sup> | b*          | b <sup>*++</sup> | b <sup>0</sup>    | b <sup>0++</sup> | Seq. | y                  | y <sup>++</sup> | y*          | y <sup>*++</sup> | y <sup>0</sup> | y <sup>0++</sup> | #  |
|----|--------------------|-----------------|-------------|------------------|-------------------|------------------|------|--------------------|-----------------|-------------|------------------|----------------|------------------|----|
| 1  | 72.044390          | 36.525833       |             |                  |                   |                  | A    |                    |                 |             |                  |                |                  | 11 |
| 2  | 159.076418         | 80.041847       |             |                  | 141.065853        | 71.036564        | S    | 1176.673534        | 588.840405      | 1159.646985 | 580.327131       | 1158.662969    | 579.835123       | 10 |
| 3  | <b>287.134996</b>  | 144.071136      | 270.108447  | 135.557862       | <b>269.124431</b> | 135.065854       | Q    | <b>1089.641506</b> | 545.324391      | 1072.614957 | 536.811117       |                |                  | 9  |
| 4  | <b>400.219060</b>  | 200.613168      | 383.192511  | 192.099894       | 382.208495        | 191.607886       | I    | <b>961.582928</b>  | 481.295102      | 944.556379  | 472.781828       |                |                  | 8  |
| 5  | 513.303124         | 257.155200      | 496.276575  | 248.641926       | 495.292559        | 248.149918       | L    | <b>848.498864</b>  | 424.753070      | 831.472315  | 416.239795       |                |                  | 7  |
| 6  | 627.346051         | 314.176664      | 610.319502  | 305.663389       | 609.335486        | 305.171381       | N    | <b>735.414800</b>  | 368.211038      | 718.388251  | 359.697764       |                |                  | 6  |
| 7  | <b>698.383165</b>  | 349.695221      | 681.356616  | 341.181946       | 680.372600        | 340.689938       | A    | 621.371873         | 311.189575      | 604.345324  | 302.676300       |                |                  | 5  |
| 8  | 861.446494         | 431.226885      | 844.419945  | 422.713611       | 843.435929        | 422.221603       | Y    | <b>550.334759</b>  | 275.671018      | 533.308210  | 267.157743       |                |                  | 4  |
| 9  | <b>974.530558</b>  | 487.768917      | 957.504009  | 479.255643       | 956.519993        | 478.763635       | L    | <b>387.271430</b>  | 194.139353      | 370.244881  | 185.626078       |                |                  | 3  |
| 10 | <b>1073.598972</b> | 537.303124      | 1056.572423 | 528.789850       | 1055.588407       | 528.297842       | V    | <b>274.187366</b>  | 137.597321      | 257.160817  | 129.084046       |                |                  | 2  |
| 11 |                    |                 |             |                  |                   |                  | R    | 175.118952         | 88.063114       | 158.092403  | 79.549839        |                |                  | 1  |

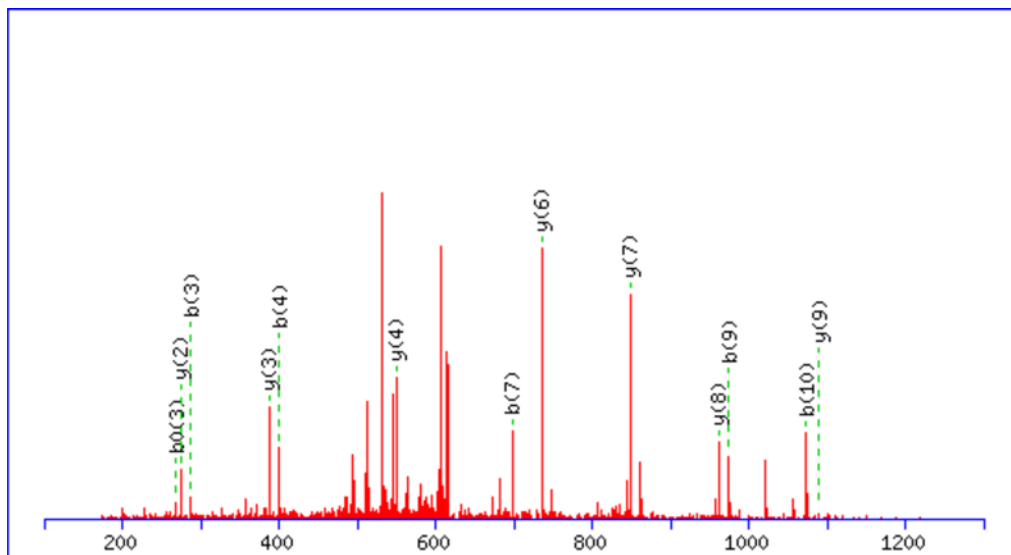

## Peptide View

MS/MS Fragmentation of **ITCAEEGWSPTPK**

Found in **IPI00006154**, Tax\_Id=9606 Gene\_Symbol=CFHR2 Isoform Long of Complement factor H-related protein 2

**Experiment:** 44 - OPE-2 **Fraction:** OPE-2

Match to Query 10803: 1474.676648 from(738.345600,2+)

Title: OECHL100312\_38.10602.10602.2.dta

Data file \\Boromir\masse\Data LTQ-Orbitrap\Chrystelle Lacroix\Etude clinique sJPU\OECHL100312\_38.raw

**Monoisotopic mass of neutral peptide Mr(calc):** 1474.676224 **Fixed modifications:** Carbamidomethyl (C) (apply to specified residues or termini only) **Ions Score:** 56

**Expect:** 0.00024 **Matches :** 22/114 fragment ions using 39 most intense peaks ([help](#))

| # | b          | b <sup>++</sup> | b <sup>0</sup> | b <sup>0++</sup> | Seq. | y           | y <sup>++</sup> | y <sup>*</sup> | y <sup>*++</sup> | y <sup>0</sup> | y <sup>0++</sup> | #  |
|---|------------|-----------------|----------------|------------------|------|-------------|-----------------|----------------|------------------|----------------|------------------|----|
| 1 | 114.091340 | 57.549308       |                |                  | I    |             |                 |                |                  |                |                  | 13 |
| 2 | 215.139019 | 108.073147      | 197.128454     | 99.067865        | T    | 1362.599444 | 681.803360      | 1345.572895    | 673.290086       | 1344.588879    | 672.798078       | 12 |
| 3 | 375.169668 | 188.088472      | 357.159103     | 179.083190       | C    | 1261.551765 | 631.279521      | 1244.525216    | 622.766246       | 1243.541200    | 622.274238       | 11 |
| 4 | 446.206782 | 223.607029      | 428.196217     | 214.601747       | A    | 1101.521116 | 551.264196      | 1084.494567    | 542.750922       | 1083.510551    | 542.258914       | 10 |
| 5 | 575.249375 | 288.128326      | 557.238810     | 279.123043       | E    | 1030.484002 | 515.745639      | 1013.457453    | 507.232365       | 1012.473437    | 506.740357       | 9  |
| 6 | 704.291968 | 352.649622      | 686.281403     | 343.644340       | E    | 901.441409  | 451.224343      | 884.414860     | 442.711068       | 883.430844     | 442.219060       | 8  |



|    |             |            |             |            |   |            |            |            |            |            |            |   |
|----|-------------|------------|-------------|------------|---|------------|------------|------------|------------|------------|------------|---|
| 7  | 761.313432  | 381.160354 | 743.302867  | 372.155072 | G | 772.398816 | 386.703046 | 755.372267 | 378.189772 | 754.388251 | 377.697764 | 7 |
| 8  | 947.392745  | 474.200011 | 929.382180  | 465.194728 | W | 715.377352 | 358.192314 | 698.350803 | 349.679040 | 697.366787 | 349.187032 | 6 |
| 9  | 1034.424773 | 517.716025 | 1016.414208 | 508.710742 | S | 529.298039 | 265.152658 | 512.271490 | 256.639383 | 511.287474 | 256.147375 | 5 |
| 10 | 1131.477537 | 566.242407 | 1113.466972 | 557.237124 | P | 442.266011 | 221.636644 | 425.239462 | 213.123369 | 424.255446 | 212.631361 | 4 |
| 11 | 1232.525216 | 616.766246 | 1214.514651 | 607.760964 | T | 345.213247 | 173.110262 | 328.186698 | 164.596987 | 327.202682 | 164.104979 | 3 |
| 12 | 1329.577980 | 665.292628 | 1311.567415 | 656.287346 | P | 244.165568 | 122.586422 | 227.139019 | 114.073148 |            |            | 2 |
| 13 |             |            |             |            | K | 147.112804 | 74.060040  | 130.086255 | 65.546765  |            |            | 1 |

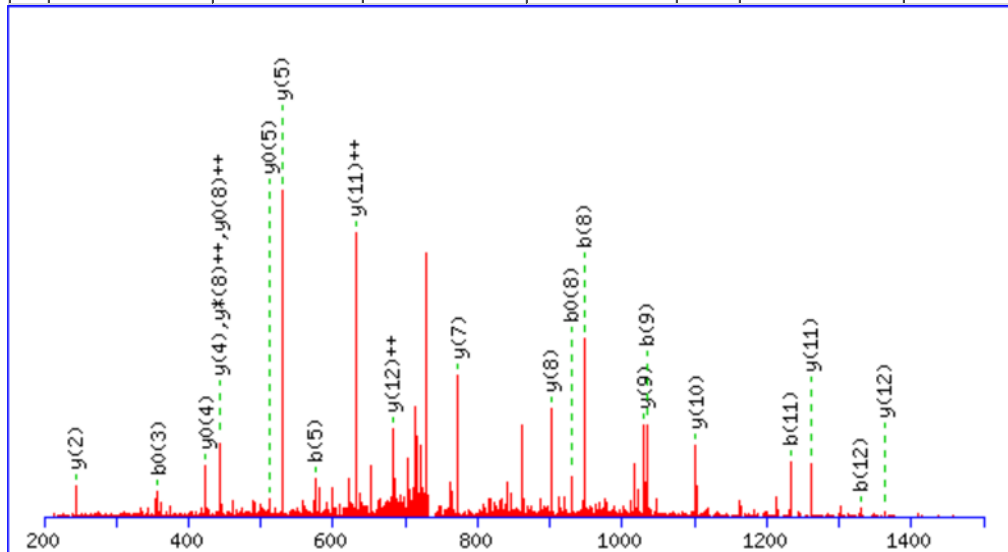

## Peptide View

MS/MS Fragmentation of **SAAVTSEFHLVPSR**

Found in **IPI00043992**, Tax\_Id=9606 Gene\_Symbol=PVRL4 Poliovirus receptor-related protein 4

**Experiment:** 44 - OPE-2 **Fraction:** OPE-2

Match to Query 11036: 1499.774048 from(750.894300,2+)

Title: OECHL100312\_38.14040.14040.2.dta

Data file \\Boromir\masse\Data LTQ-Orbitrap\Chrystelle Lacroix\Etude clinique sJPU\OECHL100312\_38.raw

**Monoisotopic mass of neutral peptide Mr(calc):** 1499.773239 **Fixed modifications:** Carbamidomethyl (C) (apply to specified residues or termini only) **Ions Score:** 56

**Expect:** 0.00029 **Matches :** 34/128 fragment ions using 100 most intense peaks ([help](#))

| #  | <b>b</b>           | <b>b<sup>++</sup></b> | <b>b<sup>0</sup></b> | <b>b<sup>0++</sup></b> | Seq. | <b>y</b>           | <b>y<sup>++</sup></b> | <b>y<sup>*</sup></b> | <b>y<sup>*++</sup></b> | <b>y<sup>0</sup></b> | <b>y<sup>0++</sup></b> | #  |
|----|--------------------|-----------------------|----------------------|------------------------|------|--------------------|-----------------------|----------------------|------------------------|----------------------|------------------------|----|
| 1  | 88.039304          | 44.523290             | 70.028739            | 35.518008              | S    |                    |                       |                      |                        |                      |                        | 14 |
| 2  | 159.076418         | 80.041847             | 141.065853           | 71.036564              | A    | <b>1413.748490</b> | 707.377883            | 1396.721941          | <b>698.864609</b>      | 1395.737925          | <b>698.372600</b>      | 13 |
| 3  | <b>230.113532</b>  | 115.560404            | 212.102967           | 106.555121             | A    | <b>1342.711376</b> | <b>671.859326</b>     | 1325.684827          | 663.346052             | 1324.700811          | 662.854043             | 12 |
| 4  | 329.181946         | 165.094611            | <b>311.171381</b>    | 156.089328             | V    | <b>1271.674262</b> | <b>636.340769</b>     | 1254.647713          | 627.827495             | 1253.663697          | 627.335487             | 11 |
| 5  | <b>430.229625</b>  | 215.618450            | 412.219060           | 206.613168             | T    | <b>1172.605848</b> | <b>586.806562</b>     | 1155.579299          | 578.293288             | 1154.595283          | 577.801279             | 10 |
| 6  | 517.261653         | 259.134465            | <b>499.251088</b>    | 250.129182             | S    | <b>1071.558169</b> | <b>536.282723</b>     | 1054.531620          | 527.769448             | 1053.547604          | 527.277440             | 9  |
| 7  | 646.304246         | 323.655761            | 628.293681           | 314.650479             | E    | <b>984.526141</b>  | 492.766709            | 967.499592           | 484.253434             | 966.515576           | 483.761426             | 8  |
| 8  | 793.372660         | 397.189968            | 775.362095           | 388.184686             | F    | <b>855.483548</b>  | <b>428.245412</b>     | 838.456999           | 419.732138             | 837.472983           | 419.240130             | 7  |
| 9  | <b>930.431572</b>  | 465.719424            | 912.421007           | 456.714141             | H    | <b>708.415134</b>  | 354.711205            | 691.388585           | 346.197931             | 690.404569           | 345.705923             | 6  |
| 10 | <b>1043.515636</b> | 522.261456            | 1025.505071          | 513.256173             | L    | <b>571.356222</b>  | 286.181749            | 554.329673           | 277.668475             | 553.345657           | 277.176467             | 5  |
| 11 | <b>1142.584050</b> | <b>571.795663</b>     | <b>1124.573485</b>   | 562.790380             | V    | <b>458.272158</b>  | <b>229.639717</b>     | 441.245609           | 221.126443             | 440.261593           | 220.634435             | 4  |
| 12 | <b>1239.636814</b> | 620.322045            | 1221.626249          | 611.316762             | P    | <b>359.203744</b>  | 180.105510            | <b>342.177195</b>    | 171.592236             | <b>341.193179</b>    | 171.100228             | 3  |
| 13 | <b>1326.668842</b> | 663.838059            | 1308.658277          | 654.832777             | S    | <b>262.150980</b>  | 131.579128            | <b>245.124431</b>    | 123.065854             | 244.140415           | 122.573846             | 2  |
| 14 |                    |                       |                      |                        | R    | 175.118952         | 88.063114             | 158.092403           | 79.549839              |                      |                        | 1  |

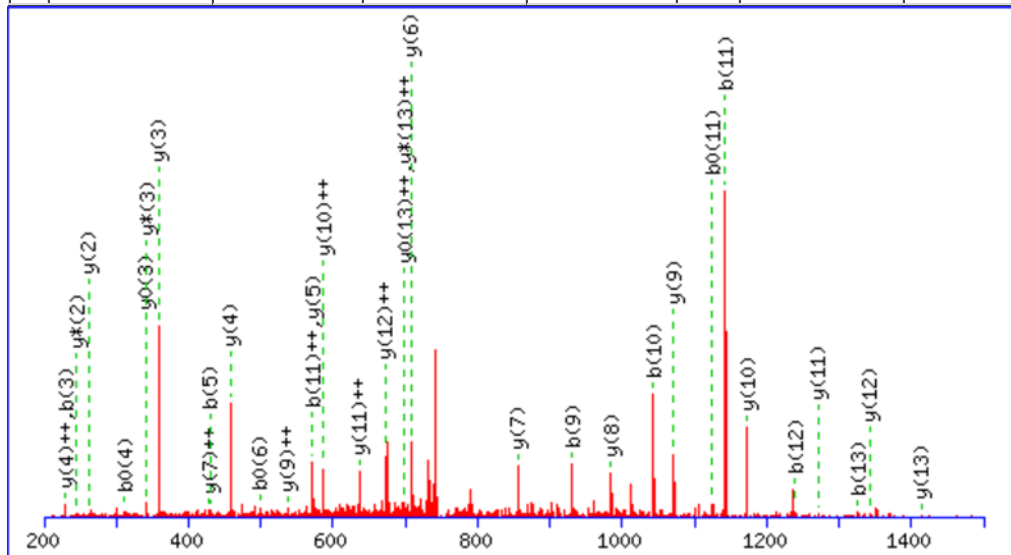

**Peptide View**MS/MS Fragmentation of **AVFVDLEPTVIDEVR**Found in **IPI00166768**, Tax\_Id=9606 Gene\_Symbol=TUBA1C TUBA1C protein**Experiment:** 44 - OPE-2 **Fraction:** OPE-2

Match to Query 13142: 1700.901248 from(851.457900,2+)

Title: OECHL100312\_38.19741.19741.2.dta

Data file \\Boromir\masse\Data LTQ-Orbitrap\Chrystelle Lacroix\Etude clinique sJPU\OECHL100312\_38.raw

**Monoisotopic mass of neutral peptide Mr(calc):** 1700.898514**Fixed modifications:** Carbamidomethyl (C) (apply to specified residues or termini only)**Ions Score:** 55**Expect:** 0.00043**Matches :** 12/128 fragment ions using 15 most intense peaks ([help](#))

| #         | b                  | b <sup>++</sup> | b <sup>0</sup> | b <sup>0++</sup> | Seq.     | y                  | y <sup>++</sup> | y*          | y <sup>*++</sup> | y <sup>0</sup>     | y <sup>0++</sup> | #         |
|-----------|--------------------|-----------------|----------------|------------------|----------|--------------------|-----------------|-------------|------------------|--------------------|------------------|-----------|
| <b>1</b>  | 72.044390          | 36.525833       |                |                  | <b>A</b> |                    |                 |             |                  |                    |                  | <b>15</b> |
| <b>2</b>  | 171.112804         | 86.060040       |                |                  | <b>V</b> | 1630.868665        | 815.937971      | 1613.842116 | 807.424696       | 1612.858100        | 806.932688       | <b>14</b> |
| <b>3</b>  | <b>318.181218</b>  | 159.594247      |                |                  | <b>F</b> | 1531.800251        | 766.403764      | 1514.773702 | 757.890489       | 1513.789686        | 757.398481       | <b>13</b> |
| <b>4</b>  | 417.249632         | 209.128454      |                |                  | <b>V</b> | <b>1384.731837</b> | 692.869557      | 1367.705288 | 684.356282       | 1366.721272        | 683.864274       | <b>12</b> |
| <b>5</b>  | 532.276575         | 266.641926      | 514.266010     | 257.636643       | <b>D</b> | <b>1285.663423</b> | 643.335350      | 1268.636874 | 634.822075       | 1267.652858        | 634.330067       | <b>11</b> |
| <b>6</b>  | <b>645.360639</b>  | 323.183958      | 627.350074     | 314.178675       | <b>L</b> | <b>1170.636480</b> | 585.821878      | 1153.609931 | 577.308604       | 1152.625915        | 576.816596       | <b>10</b> |
| <b>7</b>  | <b>774.403232</b>  | 387.705254      | 756.392667     | 378.699972       | <b>E</b> | <b>1057.552416</b> | 529.279846      | 1040.525867 | 520.766572       | <b>1039.541851</b> | 520.274564       | <b>9</b>  |
| <b>8</b>  | 871.455996         | 436.231636      | 853.445431     | 427.226354       | <b>P</b> | <b>928.509823</b>  | 464.758550      | 911.483274  | 456.245275       | 910.499258         | 455.753267       | <b>8</b>  |
| <b>9</b>  | 972.503675         | 486.755476      | 954.493110     | 477.750193       | <b>T</b> | 831.457059         | 416.232168      | 814.430510  | 407.718893       | 813.446494         | 407.226885       | <b>7</b>  |
| <b>10</b> | 1071.572089        | 536.289683      | 1053.561524    | 527.284400       | <b>V</b> | 730.409380         | 365.708328      | 713.382831  | 357.195054       | 712.398815         | 356.703046       | <b>6</b>  |
| <b>11</b> | 1184.656153        | 592.831715      | 1166.645588    | 583.826432       | <b>I</b> | <b>631.340966</b>  | 316.174121      | 614.314417  | 307.660846       | 613.330401         | 307.168838       | <b>5</b>  |
| <b>12</b> | 1299.683096        | 650.345186      | 1281.672531    | 641.339904       | <b>D</b> | <b>518.256902</b>  | 259.632089      | 501.230353  | 251.118815       | 500.246337         | 250.626807       | <b>4</b>  |
| <b>13</b> | 1428.725689        | 714.866483      | 1410.715124    | 705.861200       | <b>E</b> | 403.229959         | 202.118617      | 386.203410  | 193.605343       | 385.219394         | 193.113335       | <b>3</b>  |
| <b>14</b> | <b>1527.794103</b> | 764.400690      | 1509.783538    | 755.395407       | <b>V</b> | 274.187366         | 137.597321      | 257.160817  | 129.084047       |                    |                  | <b>2</b>  |
| <b>15</b> |                    |                 |                |                  | <b>R</b> | 175.118952         | 88.063114       | 158.092403  | 79.549839        |                    |                  | <b>1</b>  |

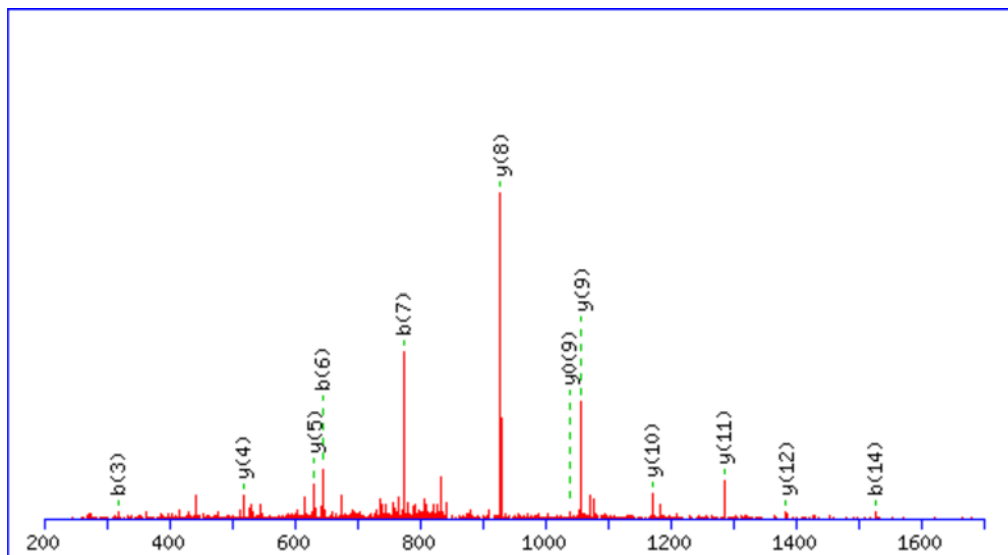

## Peptide View

MS/MS Fragmentation of **VYHVGLGDAAQPR**

Found in **IPI00297252**, Tax\_Id=9606 Gene\_Symbol=SULF2 Isoform 1 of Extracellular sulfatase Sulf-2

**Experiment:** 44 - OPE-2 **Fraction:** OPE-2

Match to Query 9862: 1381.711872 from(461.577900,3+)

Title: OECHL100312\_38.9264.9264.3.dta

Data file \\Boromir\masse\Data LTQ-Orbitrap\Chrystelle Lacroix\Etude clinique sJPU\OECHL100312\_38.raw

**Monoisotopic mass of neutral peptide Mr(calc):** 1381.710251 **Fixed modifications:** Carbamidomethyl (C) (apply to specified residues or termini only) **Ions Score:** 54

**Expect:** 0.00035 **Matches :** 21/100 fragment ions using 20 most intense peaks ([help](#))

| # | b                 | b <sup>++</sup>   | b* | b <sup>*++</sup> | b <sup>0</sup> | b <sup>0++</sup> | Seq. | y                 | y <sup>++</sup>   | y*          | y <sup>*++</sup> | y <sup>0</sup> | y <sup>0++</sup> | #  |
|---|-------------------|-------------------|----|------------------|----------------|------------------|------|-------------------|-------------------|-------------|------------------|----------------|------------------|----|
| 1 | 100.075690        | 50.541483         |    |                  |                |                  | V    |                   |                   |             |                  |                |                  | 13 |
| 2 | 263.139019        | 132.073148        |    |                  |                |                  | Y    | 1283.649112       | 642.328194        | 1266.622563 | 633.814920       | 1265.638547    | 633.322912       | 12 |
| 3 | <b>400.197931</b> | <b>200.602603</b> |    |                  |                |                  | H    | 1120.585783       | 560.796530        | 1103.559234 | 552.283255       | 1102.575218    | 551.791247       | 11 |
| 4 | 499.266345        | 250.136811        |    |                  |                |                  | V    | <b>983.526871</b> | <b>492.267074</b> | 966.500322  | 483.753799       | 965.516306     | 483.261791       | 10 |
| 5 | <b>556.287809</b> | 278.647543        |    |                  |                |                  | G    | 884.458457        | 442.732867        | 867.431908  | 434.219592       | 866.447892     | 433.727584       | 9  |
| 6 | <b>669.371873</b> | 335.189575        |    |                  |                |                  | L    | 827.436993        | 414.222135        | 810.410444  | 405.708860       | 809.426428     | 405.216852       | 8  |

|    |             |            |             |            |             |            |   |            |            |            |            |            |            |   |
|----|-------------|------------|-------------|------------|-------------|------------|---|------------|------------|------------|------------|------------|------------|---|
| 7  | 726.393337  | 363.700307 |             |            |             |            | G | 714.352929 | 357.680103 | 697.326380 | 349.166828 | 696.342364 | 348.674820 | 7 |
| 8  | 841.420280  | 421.213778 |             |            | 823.409715  | 412.208496 | D | 657.331465 | 329.169371 | 640.304916 | 320.656096 | 639.320900 | 320.164088 | 6 |
| 9  | 912.457394  | 456.732335 |             |            | 894.446829  | 447.727053 | A | 542.304522 | 271.655899 | 525.277973 | 263.142625 |            |            | 5 |
| 10 | 983.494508  | 492.250892 |             |            | 965.483943  | 483.245610 | A | 471.267408 | 236.137342 | 454.240859 | 227.624068 |            |            | 4 |
| 11 | 1111.553086 | 556.280181 | 1094.526537 | 547.766907 | 1093.542521 | 547.274899 | Q | 400.230294 | 200.618785 | 383.203745 | 192.105511 |            |            | 3 |
| 12 | 1208.605850 | 604.806563 | 1191.579301 | 596.293289 | 1190.595285 | 595.801281 | P | 272.171716 | 136.589496 | 255.145167 | 128.076221 |            |            | 2 |
| 13 |             |            |             |            |             |            | R | 175.118952 | 88.063114  | 158.092403 | 79.549839  |            |            | 1 |

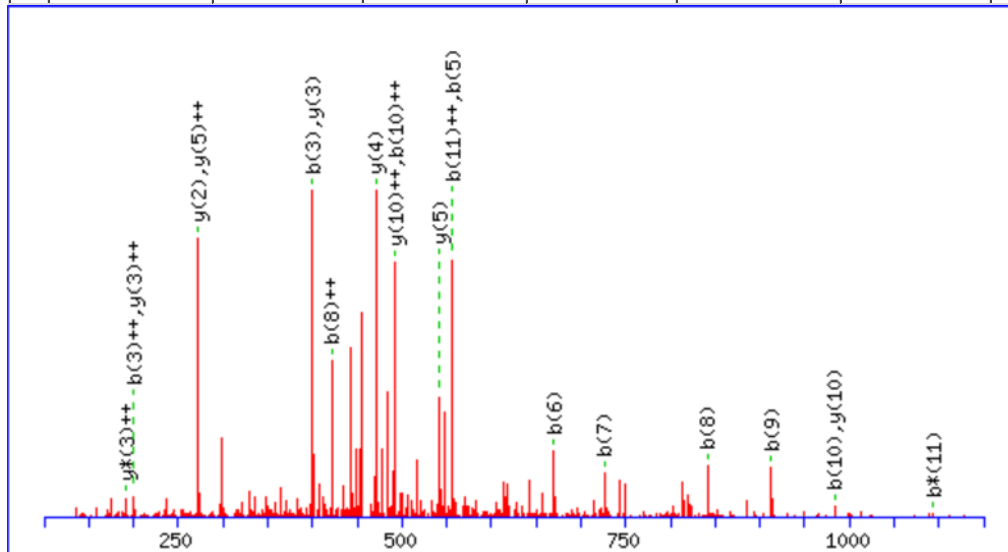

## Peptide View

MS/MS Fragmentation of **DGILFQLLR**

Found in **IPI00022371**, Tax\_Id=9606 Gene\_Symbol=HRG Histidine-rich glycoprotein

**Experiment:** 44 - OPE-2 **Fraction:** OPE-2

Match to Query 5805: 1123.602448 from(562.808500,2+)

Title: OECHL100312\_38.20519.20519.2.dta

Data file \\Boromir\masse\Data LTQ-Orbitrap\Chrystelle Lacroix\Etude clinique sJPU\OECHL100312\_38.raw

**Monoisotopic mass of neutral peptide Mr(calc):** 1123.602585 **Fixed modifications:** Carbamidomethyl (C) (apply to specified residues or termini only) **Ions Score:** 49

**Expect:** 0.00082 **Matches :** 15/70 fragment ions using 27 most intense peaks ([help](#))

| # | <b>b</b>          | <b>b<sup>++</sup></b> | <b>b*</b>         | <b>b<sup>*++</sup></b> | <b>b<sup>0</sup></b> | <b>b<sup>0++</sup></b> | Seq.     | <b>y</b>          | <b>y<sup>++</sup></b> | <b>y*</b>  | <b>y<sup>*++</sup></b> | #        |
|---|-------------------|-----------------------|-------------------|------------------------|----------------------|------------------------|----------|-------------------|-----------------------|------------|------------------------|----------|
| 1 | 116.034219        | 58.520748             |                   |                        | 98.023654            | 49.515465              | <b>D</b> |                   |                       |            |                        | <b>9</b> |
| 2 | 173.055683        | 87.031479             |                   |                        | 155.045118           | 78.026197              | <b>G</b> | 1009.582929       | 505.295103            | 992.556380 | 496.781828             | <b>8</b> |
| 3 | <b>336.119012</b> | 168.563144            |                   |                        | 318.108447           | 159.557862             | <b>Y</b> | <b>952.561465</b> | 476.784371            | 935.534916 | 468.271096             | <b>7</b> |
| 4 | <b>449.203076</b> | 225.105176            |                   |                        | <b>431.192511</b>    | 216.099894             | <b>L</b> | <b>789.498136</b> | 395.252706            | 772.471587 | 386.739432             | <b>6</b> |
| 5 | <b>596.271490</b> | 298.639383            |                   |                        | 578.260925           | 289.634101             | <b>F</b> | <b>676.414072</b> | 338.710674            | 659.387523 | 330.197400             | <b>5</b> |
| 6 | 724.330068        | 362.668672            | 707.303519        | 354.155398             | 706.319503           | 353.663390             | <b>Q</b> | <b>529.345658</b> | 265.176467            | 512.319109 | 256.663193             | <b>4</b> |
| 7 | <b>837.414132</b> | 419.210704            | 820.387583        | 410.697430             | 819.403567           | 410.205422             | <b>L</b> | <b>401.287080</b> | 201.147178            | 384.260531 | 192.633904             | <b>3</b> |
| 8 | <b>950.498196</b> | 475.752736            | <b>933.471647</b> | 467.239462             | <b>932.487631</b>    | 466.747454             | <b>L</b> | <b>288.203016</b> | 144.605146            | 271.176467 | 136.091872             | <b>2</b> |
| 9 |                   |                       |                   |                        |                      |                        | <b>R</b> | <b>175.118952</b> | 88.063114             | 158.092403 | 79.549840              | <b>1</b> |

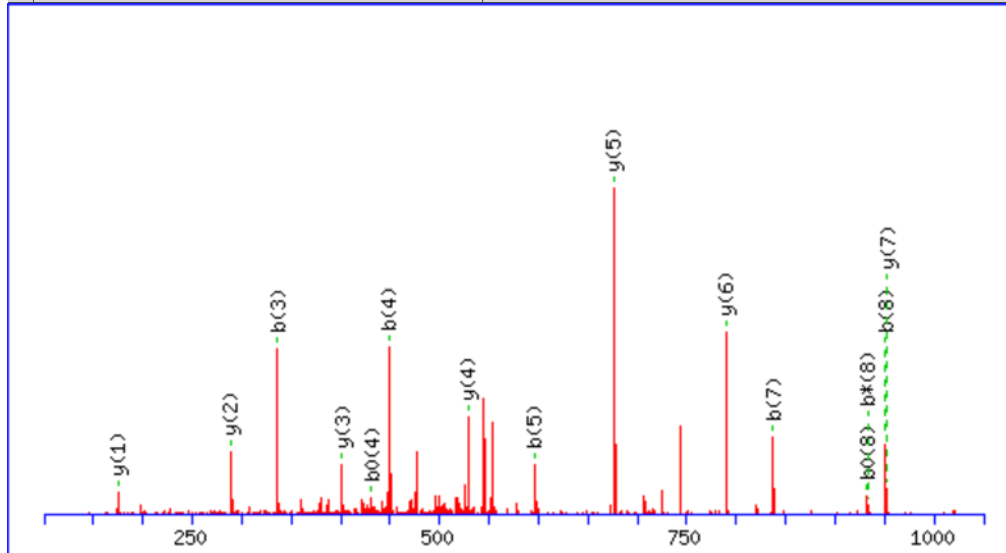

## Peptide View

MS/MS Fragmentation of **CQCPAGAALQADGR**

Found in **IPI00010737**, Tax\_Id=9606 Gene\_Symbol=THBD Thrombomodulin

**Experiment:** 14 - S\_E-2 **Fraction:** S\_E-2

Match to Query 10089: 1473.645048 from(737.829800,2+)

Title: OECHL100312\_36.7469.7469.2.dta

Data file \\Boromir\masse\Data LTQ-Orbitrap\Chrystelle Lacroix\Etude clinique sJPU\OECHL100312\_36.raw

**Monoisotopic mass of neutral peptide Mr(calc):** 1473.645279**Fixed modifications:** Carbamidomethyl (C) (apply to specified residues or termini only)**Ions Score:** 66**Expect:** 1.4e-005**Matches :** 22/128 fragment ions using 39 most intense peaks ([help](#))

| #  | b                  | b <sup>++</sup> | b*                | b* <sup>++</sup>  | b <sup>0</sup> | b <sup>0++</sup> | Seq. | y                  | y <sup>++</sup>   | y*          | y* <sup>++</sup> | y <sup>0</sup> | y <sup>0++</sup> | #  |
|----|--------------------|-----------------|-------------------|-------------------|----------------|------------------|------|--------------------|-------------------|-------------|------------------|----------------|------------------|----|
| 1  | 161.037925         | 81.022600       |                   |                   |                |                  | C    |                    |                   |             |                  |                |                  | 14 |
| 2  | <b>289.096503</b>  | 145.051890      | <b>272.069954</b> | 136.538615        |                |                  | Q    | 1314.621912        | 657.814594        | 1297.595363 | 649.301320       | 1296.611347    | 648.809312       | 13 |
| 3  | <b>449.127152</b>  | 225.067214      | 432.100603        | 216.553940        |                |                  | C    | <b>1186.563334</b> | <b>593.785305</b> | 1169.536785 | 585.272031       | 1168.552769    | 584.780023       | 12 |
| 4  | <b>546.179916</b>  | 273.593596      | 529.153367        | 265.080322        |                |                  | P    | <b>1026.532685</b> | 513.769981        | 1009.506136 | 505.256706       | 1008.522120    | 504.764698       | 11 |
| 5  | <b>617.217030</b>  | 309.112153      | 600.190481        | 300.598879        |                |                  | A    | <b>929.479921</b>  | 465.243599        | 912.453372  | 456.730324       | 911.469356     | 456.238316       | 10 |
| 6  | 674.238494         | 337.622885      | 657.211945        | 329.109611        |                |                  | G    | <b>858.442807</b>  | 429.725042        | 841.416258  | 421.211767       | 840.432242     | 420.719759       | 9  |
| 7  | 745.275608         | 373.141442      | <b>728.249059</b> | 364.628168        |                |                  | A    | 801.421343         | 401.214310        | 784.394794  | 392.701035       | 783.410778     | 392.209027       | 8  |
| 8  | <b>816.312722</b>  | 408.659999      | 799.286173        | 400.146725        |                |                  | A    | 730.384229         | 365.695753        | 713.357680  | 357.182478       | 712.373664     | 356.690470       | 7  |
| 9  | <b>929.396786</b>  | 465.202031      | 912.370237        | 456.688757        |                |                  | L    | <b>659.347115</b>  | 330.177196        | 642.320566  | 321.663921       | 641.336550     | 321.171913       | 6  |
| 10 | <b>1057.455364</b> | 529.231320      | 1040.428815       | 520.718046        |                |                  | Q    | <b>546.263051</b>  | 273.635164        | 529.236502  | 265.121889       | 528.252486     | 264.629881       | 5  |
| 11 | <b>1128.492478</b> | 564.749877      | 1111.465929       | <b>556.236603</b> |                |                  | A    | <b>418.204473</b>  | 209.605874        | 401.177924  | 201.092600       | 400.193908     | 200.600592       | 4  |
| 12 | <b>1243.519421</b> | 622.263349      | 1226.492872       | 613.750074        | 1225.508856    | 613.258066       | D    | 347.167359         | 174.087317        | 330.140810  | 165.574043       | 329.156794     | 165.082035       | 3  |
| 13 | <b>1300.540885</b> | 650.774081      | 1283.514336       | 642.260806        | 1282.530320    | 641.768798       | G    | <b>232.140416</b>  | 116.573846        | 215.113867  | 108.060571       |                |                  | 2  |
| 14 |                    |                 |                   |                   |                |                  | R    | 175.118952         | 88.063114         | 158.092403  | 79.549839        |                |                  | 1  |

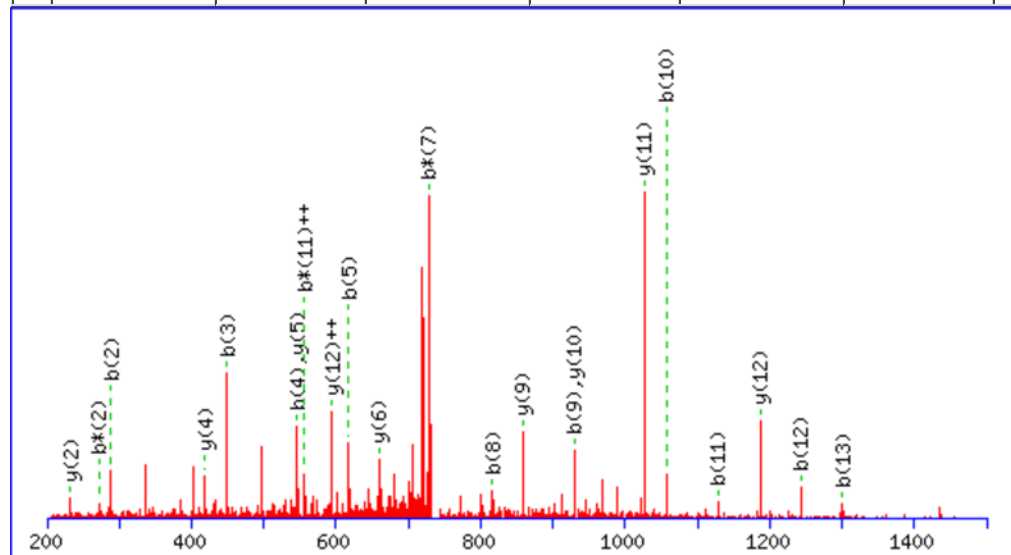

## Peptide View

MS/MS Fragmentation of **AVGLLTVISK**

Found in **IP100013446**, Tax\_Id=9606 Gene\_Symbol=PSCA Prostate stem cell antigen

**Experiment:** 14 - S\_E-2 **Fraction:** S\_E-2

Match to Query 3675: 999.635448 from(500.825000,2+)

Title: OECHL100312\_36.17303.17303.2.dta

Data file \\Boromir\masse\Data LTQ-Orbitrap\Chrystelle Lacroix\Etude clinique sJPU\OECHL100312\_36.raw

**Monoisotopic mass of neutral peptide Mr(calc):** 999.632828**Fixed modifications:** Carbamidomethyl (C) (apply to specified residues or termini only)**Ions Score:** 63

**Expect:** 5.5e-006**Matches :** 15/78 fragment ions using 25 most intense peaks ([help](#))

| #  | b                 | b <sup>++</sup>   | b <sup>0</sup> | b <sup>0++</sup> | Seq. | y                 | y <sup>++</sup> | y*         | y* <sup>++</sup> | y <sup>0</sup> | y <sup>0++</sup> | #  |
|----|-------------------|-------------------|----------------|------------------|------|-------------------|-----------------|------------|------------------|----------------|------------------|----|
| 1  | 72.044390         | 36.525833         |                |                  | A    |                   |                 |            |                  |                |                  | 10 |
| 2  | <b>171.112804</b> | 86.060040         |                |                  | V    | 929.602995        | 465.305136      | 912.576446 | 456.791861       | 911.592430     | 456.299853       | 9  |
| 3  | <b>228.134268</b> | 114.570772        |                |                  | G    | <b>830.534581</b> | 415.770929      | 813.508032 | 407.257654       | 812.524016     | 406.765646       | 8  |
| 4  | <b>341.218332</b> | <b>171.112804</b> |                |                  | L    | 773.513117        | 387.260197      | 756.486568 | 378.746922       | 755.502552     | 378.254914       | 7  |
| 5  | <b>454.302396</b> | 227.654836        |                |                  | L    | <b>660.429053</b> | 330.718165      | 643.402504 | 322.204890       | 642.418488     | 321.712882       | 6  |
| 6  | <b>555.350075</b> | 278.178676        | 537.339510     | 269.173393       | T    | <b>547.344989</b> | 274.176133      | 530.318440 | 265.662858       | 529.334424     | 265.170850       | 5  |
| 7  | <b>654.418489</b> | 327.712883        | 636.407924     | 318.707600       | V    | <b>446.297310</b> | 223.652293      | 429.270761 | 215.139018       | 428.286745     | 214.647010       | 4  |
| 8  | <b>767.502553</b> | 384.254915        | 749.491988     | 375.249632       | I    | <b>347.228896</b> | 174.118086      | 330.202347 | 165.604811       | 329.218331     | 165.112803       | 3  |
| 9  | <b>854.534581</b> | 427.770929        | 836.524016     | 418.765646       | S    | <b>234.144832</b> | 117.576054      | 217.118283 | 109.062779       | 216.134267     | 108.570771       | 2  |
| 10 |                   |                   |                |                  | K    | 147.112804        | 74.060040       | 130.086255 | 65.546765        |                |                  | 1  |



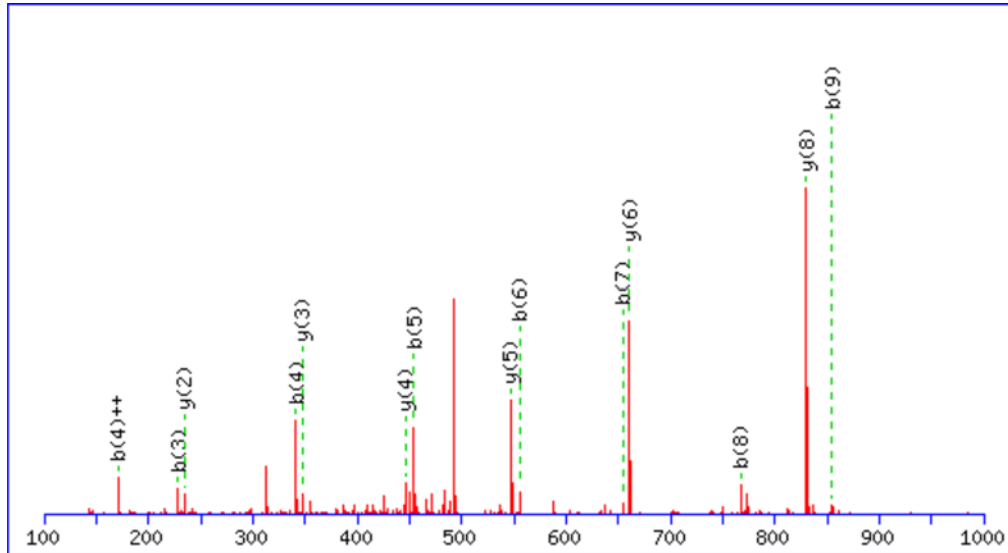

## Peptide View

MS/MS Fragmentation of **MSSPTDASVICR**

Found in **IPI00021302**, Tax\_Id=9606 Gene\_Symbol=SUSD2 Sushi domain-containing protein 2

**Experiment:** 14 - S\_E-2 **Fraction:** S\_E-2

Match to Query 8684: 1322.594248 from(662.304400,2+)

Title: OECHL100312\_36.9159.9159.2.dta

Data file \\Boromir\masse\Data LTQ-Orbitrap\Chrystelle Lacroix\Etude clinique sJPU\OECHL100312\_36.raw

**Monoisotopic mass of neutral peptide Mr(calc):** 1322.595871 **Fixed modifications:** Carbamidomethyl (C) (apply to specified residues or termini only) **Ions Score:** 62

**Expect:** 4.2e-005 **Matches :** 19/100 fragment ions using 35 most intense peaks ([help](#))

| # | b                 | b <sup>++</sup> | b <sup>0</sup>    | b <sup>0++</sup> | Seq. | y                  | y <sup>++</sup>   | y*          | y <sup>*++</sup>  | y <sup>0</sup> | y <sup>0++</sup>  | #  |
|---|-------------------|-----------------|-------------------|------------------|------|--------------------|-------------------|-------------|-------------------|----------------|-------------------|----|
| 1 | 132.047761        | 66.527518       |                   |                  | M    |                    |                   |             |                   |                |                   | 12 |
| 2 | <b>219.079789</b> | 110.043532      | 201.069224        | 101.038250       | S    | <b>1192.562663</b> | 596.784969        | 1175.536114 | 588.271695        | 1174.552098    | 587.779687        | 11 |
| 3 | <b>306.111817</b> | 153.559546      | <b>288.101252</b> | 144.554264       | S    | <b>1105.530635</b> | <b>553.268955</b> | 1088.504086 | <b>544.755681</b> | 1087.520070    | <b>544.263673</b> | 10 |
| 4 | 403.164581        | 202.085928      | 385.154016        | 193.080646       | P    | <b>1018.498607</b> | 509.752942        | 1001.472058 | 501.239667        | 1000.488042    | 500.747659        | 9  |
| 5 | 504.212260        | 252.609768      | 486.201695        | 243.604485       | T    | <b>921.445843</b>  | 461.226560        | 904.419294  | 452.713285        | 903.435278     | 452.221277        | 8  |
| 6 | 619.239203        | 310.123240      | 601.228638        | 301.117957       | D    | <b>820.398164</b>  | 410.702720        | 803.371615  | 402.189445        | 802.387599     | 401.697437        | 7  |

|    |             |            |             |            |   |            |            |            |            |            |            |   |
|----|-------------|------------|-------------|------------|---|------------|------------|------------|------------|------------|------------|---|
| 7  | 690.276317  | 345.641797 | 672.265752  | 336.636514 | A | 705.371221 | 353.189249 | 688.344672 | 344.675974 | 687.360656 | 344.183966 | 6 |
| 8  | 777.308345  | 389.157810 | 759.297780  | 380.152528 | S | 634.334107 | 317.670692 | 617.307558 | 309.157417 | 616.323542 | 308.665409 | 5 |
| 9  | 876.376759  | 438.692017 | 858.366194  | 429.686735 | V | 547.302079 | 274.154678 | 530.275530 | 265.641403 |            |            | 4 |
| 10 | 989.460823  | 495.234049 | 971.450258  | 486.228767 | I | 448.233665 | 224.620470 | 431.207116 | 216.107196 |            |            | 3 |
| 11 | 1149.491472 | 575.249374 | 1131.480907 | 566.244091 | C | 335.149601 | 168.078438 | 318.123052 | 159.565164 |            |            | 2 |
| 12 |             |            |             |            | R | 175.118952 | 88.063114  | 158.092403 | 79.549839  |            |            | 1 |

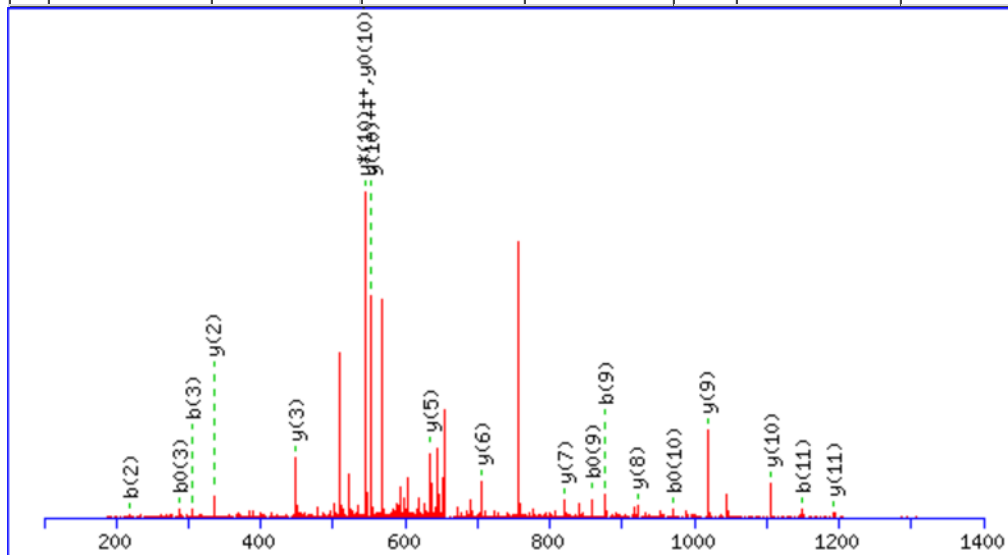

## Peptide View

MS/MS Fragmentation of **ADLAAQYTTVGR**

Found in **IP100019988**, Tax\_Id=9606 Gene\_Symbol=SGSH N-sulphoglucosamine sulphohydrolase

Experiment: 14 - S\_E-2 Fraction: S\_E-2

Match to Query 7840: 1264.641848 from(633.328200,2+)

Title: OECHL100312\_36.10733.10733.2.dta

Data file \\Boromir\masse\Data LTQ-Orbitrap\Chrystelle Lacroix\Etude clinique sJPU\OECHL100312\_36.raw

**Monoisotopic mass of neutral peptide Mr(calc):** 1264.641159 **Fixed modifications:** Carbamidomethyl (C) (apply to specified residues or termini only) **Ions Score:** 65

**Expect:** 2.6e-005 **Matches :** 17/114 fragment ions using 22 most intense peaks ([help](#))

| # | b | b <sup>++</sup> | b <sup>*</sup> | b <sup>*++</sup> | b <sup>0</sup> | b <sup>0++</sup> | Seq. | y | y <sup>++</sup> | y <sup>*</sup> | y <sup>*++</sup> | y <sup>0</sup> | y <sup>0++</sup> | # |
|---|---|-----------------|----------------|------------------|----------------|------------------|------|---|-----------------|----------------|------------------|----------------|------------------|---|
|---|---|-----------------|----------------|------------------|----------------|------------------|------|---|-----------------|----------------|------------------|----------------|------------------|---|

|    |                    |            |             |            |                    |            |   |                   |            |             |                   |             |                   |  |    |
|----|--------------------|------------|-------------|------------|--------------------|------------|---|-------------------|------------|-------------|-------------------|-------------|-------------------|--|----|
| 1  | 72.044390          | 36.525833  |             |            |                    |            | A |                   |            |             |                   |             |                   |  | 12 |
| 2  | 187.071333         | 94.039304  |             |            | 169.060768         | 85.034022  | D | 1194.611330       | 597.809303 | 1177.584781 | 589.296029        | 1176.600765 | 588.804021        |  | 11 |
| 3  | 300.155397         | 150.581336 |             |            | 282.144832         | 141.576054 | L | 1079.584387       | 540.295832 | 1062.557838 | 531.782557        | 1061.573822 | 531.290549        |  | 10 |
| 4  | <b>371.192511</b>  | 186.099894 |             |            | 353.181946         | 177.094611 | A | 966.500323        | 483.753800 | 949.473774  | 475.240525        | 948.489758  | 474.748517        |  | 9  |
| 5  | <b>442.229625</b>  | 221.618450 |             |            | 424.219060         | 212.613168 | A | <b>895.463209</b> | 448.235243 | 878.436660  | 439.721968        | 877.452644  | 439.229960        |  | 8  |
| 6  | <b>570.288203</b>  | 285.647740 | 553.261654  | 277.134465 | 552.277638         | 276.642457 | Q | <b>824.426095</b> | 412.716686 | 807.399546  | 404.203411        | 806.415530  | 403.711403        |  | 7  |
| 7  | <b>733.351532</b>  | 367.179404 | 716.324983  | 358.666130 | 715.340967         | 358.174122 | Y | <b>696.367517</b> | 348.687397 | 679.340968  | 340.174122        | 678.356952  | 339.682114        |  | 6  |
| 8  | <b>834.399211</b>  | 417.703244 | 817.372662  | 409.189969 | 816.388646         | 408.697961 | T | <b>533.304188</b> | 267.155732 | 516.277639  | <b>258.642458</b> | 515.293623  | <b>258.150450</b> |  | 5  |
| 9  | 935.446890         | 468.227083 | 918.420341  | 459.713809 | 917.436325         | 459.221801 | T | <b>432.256509</b> | 216.631892 | 415.229960  | 208.118618        | 414.245944  | 207.626610        |  | 4  |
| 10 | <b>1034.515304</b> | 517.761290 | 1017.488755 | 509.248016 | <b>1016.504739</b> | 508.756008 | V | <b>331.208830</b> | 166.108053 | 314.182281  | 157.594778        |             |                   |  | 3  |
| 11 | <b>1091.536768</b> | 546.272022 | 1074.510219 | 537.758748 | 1073.526203        | 537.266740 | G | <b>232.140416</b> | 116.573846 | 215.113867  | 108.060571        |             |                   |  | 2  |
| 12 |                    |            |             |            |                    |            | R | 175.118952        | 88.063114  | 158.092403  | 79.549839         |             |                   |  | 1  |

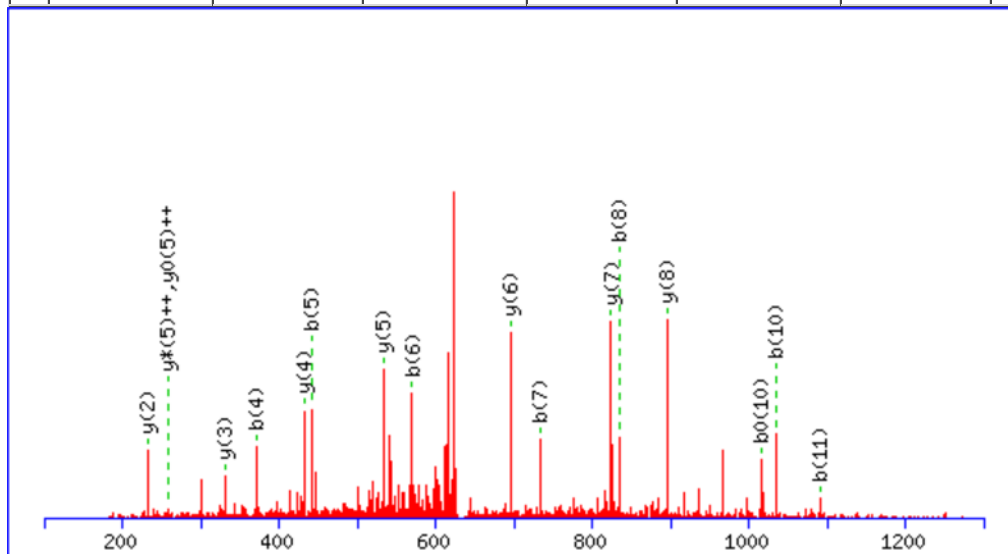

## Peptide View

MS/MS Fragmentation of **RGVSQAPTAAR**

Found in **IPI00025365**, Tax\_Id=9606 Gene\_Symbol=EDN3 Isoform Long of Endothelin-3

Experiment: 14 - S\_E-2 Fraction: S\_E-2

Match to Query 5348: 1112.605848 from(557.310200,2+)

Title: OECHL100312\_36.2297.2297.2.dta

Data file \\Boromir\masse\Data LTQ-Orbitrap\Chrystelle Lacroix\Etude clinique sJPU\OECHL100312\_36.raw

**Monoisotopic mass of neutral peptide Mr(calc):** 1112.605042**Fixed modifications:** Carbamidomethyl (C) (apply to specified residues or termini only)**Ions Score:** 55**Expect:** 0.00027**Matches :** 40/108 fragment ions using 84 most intense peaks ([help](#))

| #  | b          | b <sup>++</sup> | b*         | b <sup>*++</sup> | b <sup>0</sup> | b <sup>0++</sup> | Seq. | y          | y <sup>++</sup> | y*         | y <sup>*++</sup> | y <sup>0</sup> | y <sup>0++</sup> | #  |
|----|------------|-----------------|------------|------------------|----------------|------------------|------|------------|-----------------|------------|------------------|----------------|------------------|----|
| 1  | 157.108387 | 79.057831       | 140.081838 | 70.544557        |                |                  | R    |            |                 |            |                  |                |                  | 11 |
| 2  | 214.129851 | 107.568564      | 197.103302 | 99.055289        |                |                  | G    | 957.511221 | 479.259249      | 940.484672 | 470.745974       | 939.500656     | 470.253966       | 10 |
| 3  | 313.198265 | 157.102770      | 296.171716 | 148.589496       |                |                  | V    | 900.489757 | 450.748517      | 883.463208 | 442.235242       | 882.479192     | 441.743234       | 9  |
| 4  | 400.230293 | 200.618785      | 383.203744 | 192.105510       | 382.219728     | 191.613502       | S    | 801.421343 | 401.214310      | 784.394794 | 392.701035       | 783.410778     | 392.209027       | 8  |
| 5  | 528.288871 | 264.648074      | 511.262322 | 256.134799       | 510.278306     | 255.642791       | Q    | 714.389315 | 357.698296      | 697.362766 | 349.185021       | 696.378750     | 348.693013       | 7  |
| 6  | 599.325985 | 300.166631      | 582.299436 | 291.653356       | 581.315420     | 291.161348       | A    | 586.330737 | 293.669007      | 569.304188 | 285.155732       | 568.320172     | 284.663724       | 6  |
| 7  | 696.378749 | 348.693013      | 679.352200 | 340.179738       | 678.368184     | 339.687730       | P    | 515.293623 | 258.150450      | 498.267074 | 249.637175       | 497.283058     | 249.145167       | 5  |
| 8  | 797.426428 | 399.216852      | 780.399879 | 390.703578       | 779.415863     | 390.211570       | T    | 418.240859 | 209.624068      | 401.214310 | 201.110793       | 400.230294     | 200.618785       | 4  |
| 9  | 868.463542 | 434.735409      | 851.436993 | 426.222135       | 850.452977     | 425.730127       | A    | 317.193180 | 159.100228      | 300.166631 | 150.586953       |                |                  | 3  |
| 10 | 939.500656 | 470.253966      | 922.474107 | 461.740692       | 921.490091     | 461.248684       | A    | 246.156066 | 123.581671      | 229.129517 | 115.068397       |                |                  | 2  |
| 11 |            |                 |            |                  |                |                  | R    | 175.118952 | 88.063114       | 158.092403 | 79.549840        |                |                  | 1  |

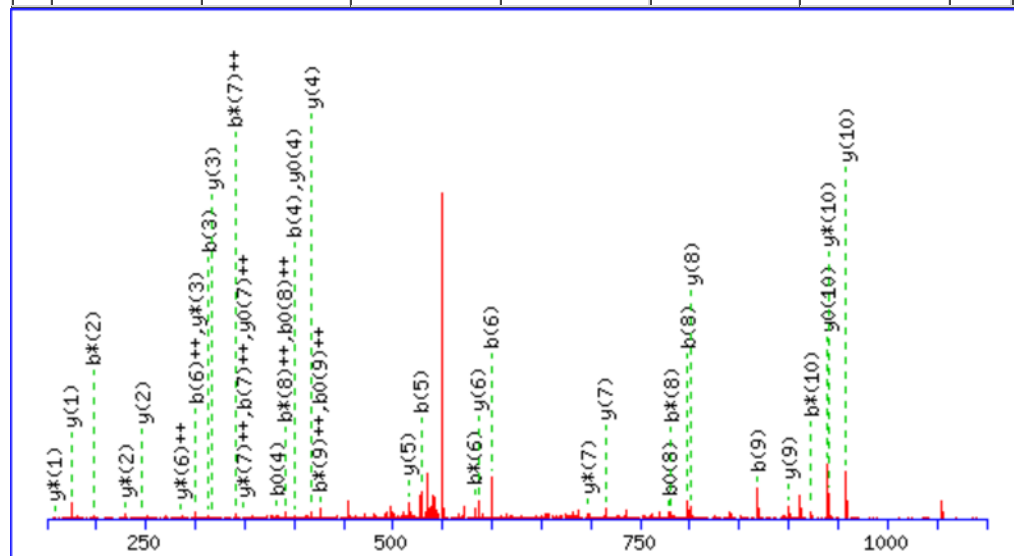

## Peptide View

MS/MS Fragmentation of **LLIYDASNLETGVPSR**

Found in **IPI00003111**, Tax\_Id=9606 Gene\_Symbol=LOC652694 Ig kappa chain V-I region AU

**Experiment:** 14 - S\_E-2 **Fraction:** S\_E-2

Match to Query 12835: 1746.916848 from(874.465700,2+)

Title: OECHL100312\_36.17047.17047.2.dta

Data file \\Boromir\masse\Data LTQ-Orbitrap\Chrystelle Lacroix\Etude clinique sJPU\OECHL100312\_36.raw

**Monoisotopic mass of neutral peptide Mr(calc):** 1746.915192**Fixed modifications:** Carbamidomethyl (C) (apply to specified residues or termini only)**Ions Score:** 63

**Expect:** 5.5e-005**Matches :** 34/156 fragment ions using 75 most intense peaks ([help](#))

| #  | b                  | b <sup>++</sup>   | b*                 | b <sup>*++</sup> | b <sup>0</sup>     | b <sup>0++</sup> | Seq. | y                  | y <sup>++</sup>   | y*                | y <sup>*++</sup> | y <sup>0</sup>     | y <sup>0++</sup> | #  |
|----|--------------------|-------------------|--------------------|------------------|--------------------|------------------|------|--------------------|-------------------|-------------------|------------------|--------------------|------------------|----|
| 1  | 114.091340         | 57.549308         |                    |                  |                    |                  | L    |                    |                   |                   |                  |                    |                  | 16 |
| 2  | 227.175404         | 114.091340        |                    |                  |                    |                  | L    | 1634.838427        | 817.922852        | 1617.811878       | 809.409577       | 1616.827862        | 808.917569       | 15 |
| 3  | 340.259468         | 170.633372        |                    |                  |                    |                  | I    | <b>1521.754363</b> | <b>761.380820</b> | 1504.727814       | 752.867545       | 1503.743798        | 752.375537       | 14 |
| 4  | <b>503.322797</b>  | 252.165036        |                    |                  |                    |                  | Y    | <b>1408.670299</b> | <b>704.838788</b> | 1391.643750       | 696.325513       | <b>1390.659734</b> | 695.833505       | 13 |
| 5  | <b>618.349740</b>  | 309.678508        |                    |                  | <b>600.339175</b>  | 300.673226       | D    | <b>1245.606970</b> | 623.307123        | 1228.580421       | 614.793849       | 1227.596405        | 614.301841       | 12 |
| 6  | 689.386854         | <b>345.197065</b> |                    |                  | 671.376289         | 336.191782       | A    | <b>1130.580027</b> | 565.793652        | 1113.553478       | 557.280377       | 1112.569462        | 556.788369       | 11 |
| 7  | 776.418882         | 388.713079        |                    |                  | 758.408317         | 379.707796       | S    | <b>1059.542913</b> | 530.275095        | 1042.516364       | 521.761820       | 1041.532348        | 521.269812       | 10 |
| 8  | 890.461809         | 445.734542        | <b>873.435260</b>  | 437.221268       | 872.451244         | 436.729260       | N    | <b>972.510885</b>  | 486.759081        | 955.484336        | 478.245806       | 954.500320         | 477.753798       | 9  |
| 9  | <b>1003.545873</b> | 502.276574        | 986.519324         | 493.763300       | 985.535308         | 493.271292       | L    | <b>858.467958</b>  | 429.737617        | 841.441409        | 421.224343       | 840.457393         | 420.732335       | 8  |
| 10 | <b>1132.588466</b> | 566.797871        | <b>1115.561917</b> | 558.284597       | 1114.577901        | 557.792588       | E    | <b>745.383894</b>  | 373.195585        | 728.357345        | 364.682311       | 727.373329         | 364.190303       | 7  |
| 11 | <b>1233.636145</b> | <b>617.321710</b> | 1216.609596        | 608.808436       | 1215.625580        | 608.316428       | T    | <b>616.341301</b>  | 308.674289        | 599.314752        | 300.161014       | 598.330736         | 299.669006       | 6  |
| 12 | <b>1290.657609</b> | 645.832442        | <b>1273.631060</b> | 637.319168       | <b>1272.647044</b> | 636.827160       | G    | <b>515.293622</b>  | 258.150449        | 498.267073        | 249.637175       | 497.283057         | 249.145167       | 5  |
| 13 | <b>1389.726023</b> | 695.366649        | <b>1372.699474</b> | 686.853375       | <b>1371.715458</b> | 686.361367       | V    | <b>458.272158</b>  | 229.639717        | 441.245609        | 221.126443       | 440.261593         | 220.634435       | 4  |
| 14 | 1486.778787        | 743.893032        | 1469.752238        | 735.379757       | 1468.768222        | 734.887749       | P    | <b>359.203744</b>  | 180.105510        | <b>342.177195</b> | 171.592236       | <b>341.193179</b>  | 171.100228       | 3  |
| 15 | <b>1573.810815</b> | 787.409046        | 1556.784266        | 778.895771       | 1555.800250        | 778.403763       | S    | 262.150980         | 131.579128        | 245.124431        | 123.065854       | 244.140415         | 122.573846       | 2  |
| 16 |                    |                   |                    |                  |                    |                  | R    | 175.118952         | 88.063114         | 158.092403        | 79.549839        |                    |                  | 1  |

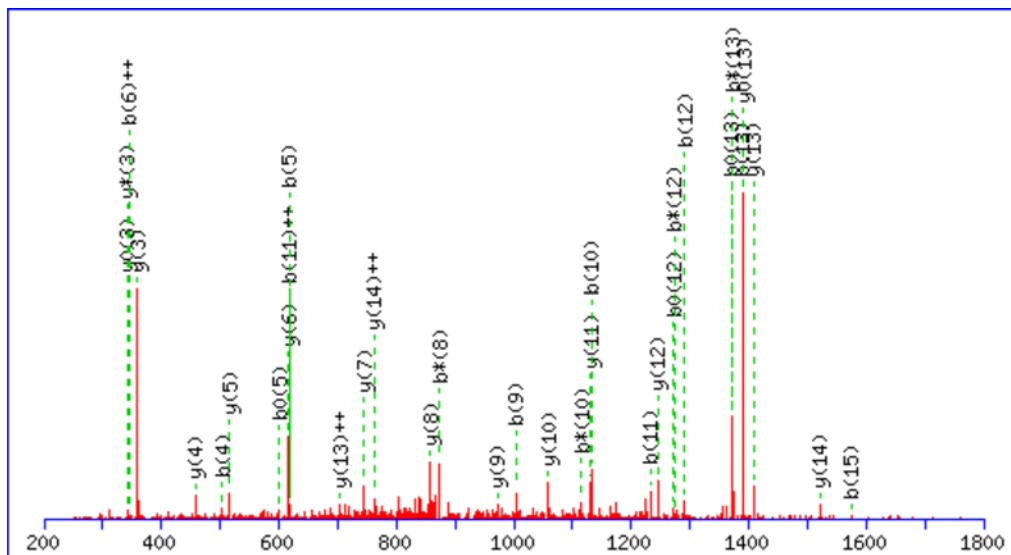

## Peptide View

MS/MS Fragmentation of **QTSILIQK**

Found in **IPI00020687**, Tax\_Id=9606 Gene\_Symbol=SPINK1 Pancreatic secretory trypsin inhibitor

**Experiment:** 14 - S\_E-2 **Fraction:** S\_E-2

Match to Query 2456: 929.555048 from(465.784800,2+)

Title: OECHL100312\_36.8243.8243.2.dta

Data file \\Boromir\masse\Data LTQ-Orbitrap\Chrystelle Lacroix\Etude clinique sJPU\OECHL100312\_36.raw

**Monoisotopic mass of neutral peptide Mr(calc):** 929.554565 **Fixed modifications:** Carbamidomethyl (C) (apply to specified residues or termini only) **Ions Score:** 55

**Expect:** 0.00012 **Matches :** 12/72 fragment ions using 16 most intense peaks ([help](#))

| # | b                 | b <sup>++</sup> | b*                | b <sup>*++</sup> | b <sup>0</sup> | b <sup>0++</sup> | Seq.     | y                 | y <sup>++</sup> | y*         | y <sup>*++</sup> | y <sup>0</sup>    | y <sup>0++</sup> | #        |
|---|-------------------|-----------------|-------------------|------------------|----------------|------------------|----------|-------------------|-----------------|------------|------------------|-------------------|------------------|----------|
| 1 | 129.065854        | 65.036565       | 112.039305        | 56.523291        |                |                  | <b>Q</b> |                   |                 |            |                  |                   |                  | <b>8</b> |
| 2 | <b>230.113533</b> | 115.560405      | 213.086984        | 107.047130       | 212.102968     | 106.555122       | <b>T</b> | <b>802.503281</b> | 401.755279      | 785.476732 | 393.242004       | <b>784.492716</b> | 392.749996       | <b>7</b> |
| 3 | 317.145561        | 159.076418      | 300.119012        | 150.563144       | 299.134996     | 150.071136       | <b>S</b> | <b>701.455602</b> | 351.231439      | 684.429053 | 342.718165       | 683.445037        | 342.226157       | <b>6</b> |
| 4 | 430.229625        | 215.618450      | <b>413.203076</b> | 207.105176       | 412.219060     | 206.613168       | <b>I</b> | 614.423574        | 307.715425      | 597.397025 | 299.202151       |                   |                  | <b>5</b> |
| 5 | 543.313689        | 272.160483      | 526.287140        | 263.647208       | 525.303124     | 263.155200       | <b>L</b> | <b>501.339510</b> | 251.173393      | 484.312961 | 242.660119       |                   |                  | <b>4</b> |
| 6 | 656.397753        | 328.702515      | <b>639.371204</b> | 320.189240       | 638.387188     | 319.697232       | <b>I</b> | <b>388.255446</b> | 194.631361      | 371.228897 | 186.118087       |                   |                  | <b>3</b> |

|   |                   |            |            |            |            |            |   |                   |            |                   |            |  |  |   |
|---|-------------------|------------|------------|------------|------------|------------|---|-------------------|------------|-------------------|------------|--|--|---|
| 7 | <b>784.456331</b> | 392.731804 | 767.429782 | 384.218529 | 766.445766 | 383.726521 | Q | <b>275.171382</b> | 138.089329 | <b>258.144833</b> | 129.576055 |  |  | 2 |
| 8 |                   |            |            |            |            |            | K | <b>147.112804</b> | 74.060040  | 130.086255        | 65.546765  |  |  | 1 |

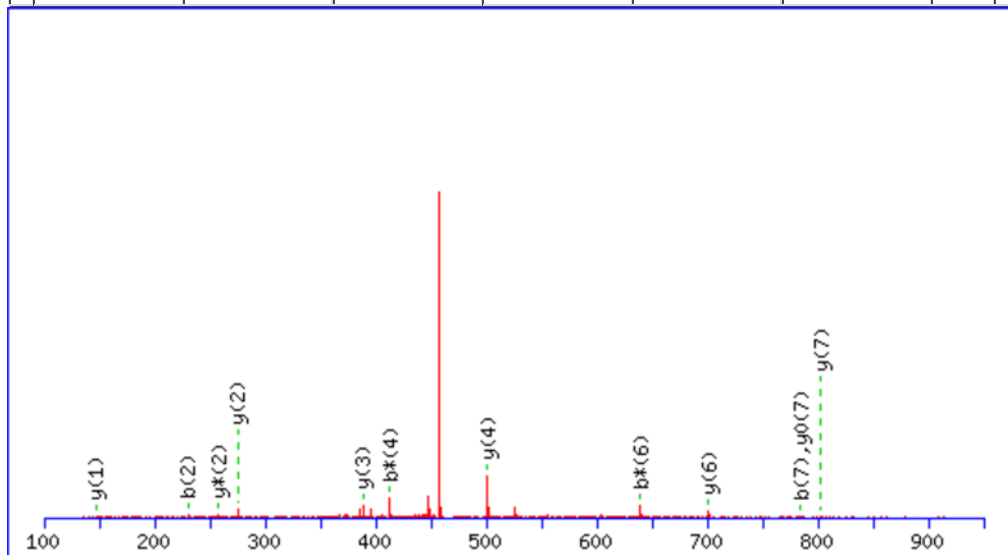

## Peptide View

MS/MS Fragmentation of **NIETIINTFHQYSVK**

Found in **IPI00027462**, Tax\_Id=9606 Gene\_Symbol=S100A9 Protein S100-A9

**Experiment:** 14 - S\_E-2 **Fraction:** S\_E-2

Match to Query 13272: 1805.931848 from(903.973200,2+)

Title: OECHL100312\_36.19507.19507.2.dta

Data file \\Boromir\masse\Data LTQ-Orbitrap\Chrystelle Lacroix\Etude clinique sJPU\OECHL100312\_36.raw

**Monoisotopic mass of neutral peptide Mr(calc):** 1805.931183 **Fixed modifications:** Carbamidomethyl (C) (apply to specified residues or termini only) **Ions Score:** 55

**Expect:** 0.00038 **Matches :** 38/160 fragment ions using 46 most intense peaks ([help](#))

| # | b                 | b <sup>++</sup> | b*         | b <sup>*++</sup> | b <sup>0</sup>    | b <sup>0++</sup> | Seq. | y                  | y <sup>++</sup>   | y*                 | y <sup>*++</sup>  | y <sup>0</sup> | y <sup>0++</sup>  | #  |
|---|-------------------|-----------------|------------|------------------|-------------------|------------------|------|--------------------|-------------------|--------------------|-------------------|----------------|-------------------|----|
| 1 | 115.050203        | 58.028740       | 98.023654  | 49.515465        |                   |                  | N    |                    |                   |                    |                   |                |                   | 15 |
| 2 | 228.134267        | 114.570771      | 211.107718 | 106.057497       |                   |                  | I    | 1692.895549        | 846.951413        | 1675.869000        | 838.438138        | 1674.884984    | 837.946130        | 14 |
| 3 | <b>357.176860</b> | 179.092068      | 340.150311 | 170.578793       | 339.166295        | 170.086785       | E    | 1579.811485        | <b>790.409381</b> | <b>1562.784936</b> | <b>781.896106</b> | 1561.800920    | <b>781.404098</b> | 13 |
| 4 | <b>458.224539</b> | 229.615907      | 441.197990 | 221.102633       | <b>440.213974</b> | 220.610625       | T    | <b>1450.768892</b> | <b>725.888084</b> | 1433.742343        | 717.374810        | 1432.758327    | 716.882802        | 12 |

|    |                    |                   |                    |            |                    |                   |          |                    |                   |                    |                   |             |                   |           |
|----|--------------------|-------------------|--------------------|------------|--------------------|-------------------|----------|--------------------|-------------------|--------------------|-------------------|-------------|-------------------|-----------|
| 5  | <b>571.308603</b>  | 286.157940        | 554.282054         | 277.644665 | <b>553.298038</b>  | 277.152657        | <b>I</b> | <b>1349.721213</b> | 675.364245        | 1332.694664        | <b>666.850970</b> | 1331.710648 | <b>666.358962</b> | <b>11</b> |
| 6  | <b>684.392667</b>  | 342.699972        | 667.366118         | 334.186697 | <b>666.382102</b>  | <b>333.694689</b> | <b>I</b> | <b>1236.637149</b> | <b>618.822213</b> | <b>1219.610600</b> | 610.308938        | 1218.626584 | 609.816930        | <b>10</b> |
| 7  | 798.435594         | 399.721435        | <b>781.409045</b>  | 391.208161 | 780.425029         | 390.716153        | <b>N</b> | <b>1123.553085</b> | 562.280181        | <b>1106.526536</b> | <b>553.766906</b> | 1105.542520 | <b>553.274898</b> | <b>9</b>  |
| 8  | 899.483273         | 450.245275        | 882.456724         | 441.732000 | 881.472708         | 441.239992        | <b>T</b> | <b>1009.510158</b> | 505.258717        | 992.483609         | <b>496.745443</b> | 991.499593  | <b>496.253435</b> | <b>8</b>  |
| 9  | 1046.551687        | 523.779482        | 1029.525138        | 515.266207 | 1028.541122        | 514.774199        | <b>F</b> | 908.462479         | 454.734878        | 891.435930         | 446.221603        | 890.451914  | 445.729595        | <b>7</b>  |
| 10 | 1183.610599        | 592.308938        | 1166.584050        | 583.795663 | 1165.600034        | 583.303655        | <b>H</b> | <b>761.394065</b>  | 381.200671        | 744.367516         | 372.687396        | 743.383500  | 372.195388        | <b>6</b>  |
| 11 | <b>1311.669177</b> | 656.338227        | 1294.642628        | 647.824952 | 1293.658612        | 647.332944        | <b>Q</b> | <b>624.335153</b>  | 312.671215        | 607.308604         | 304.157940        | 606.324588  | 303.665932        | <b>5</b>  |
| 12 | <b>1474.732506</b> | 737.869891        | <b>1457.705957</b> | 729.356617 | 1456.721941        | 728.864609        | <b>Y</b> | <b>496.276575</b>  | 248.641926        | 479.250026         | 240.128651        | 478.266010  | 239.636643        | <b>4</b>  |
| 13 | 1561.764534        | <b>781.385905</b> | 1544.737985        | 772.872631 | 1543.753969        | 772.380623        | <b>S</b> | <b>333.213246</b>  | 167.110261        | 316.186697         | 158.596987        | 315.202681  | 158.104979        | <b>3</b>  |
| 14 | <b>1660.832948</b> | 830.920112        | 1643.806399        | 822.406838 | <b>1642.822383</b> | 821.914830        | <b>V</b> | 246.181218         | 123.594247        | 229.154669         | 115.080973        |             |                   | <b>2</b>  |
| 15 |                    |                   |                    |            |                    |                   | <b>K</b> | 147.112804         | 74.060040         | 130.086255         | 65.546765         |             |                   | <b>1</b>  |

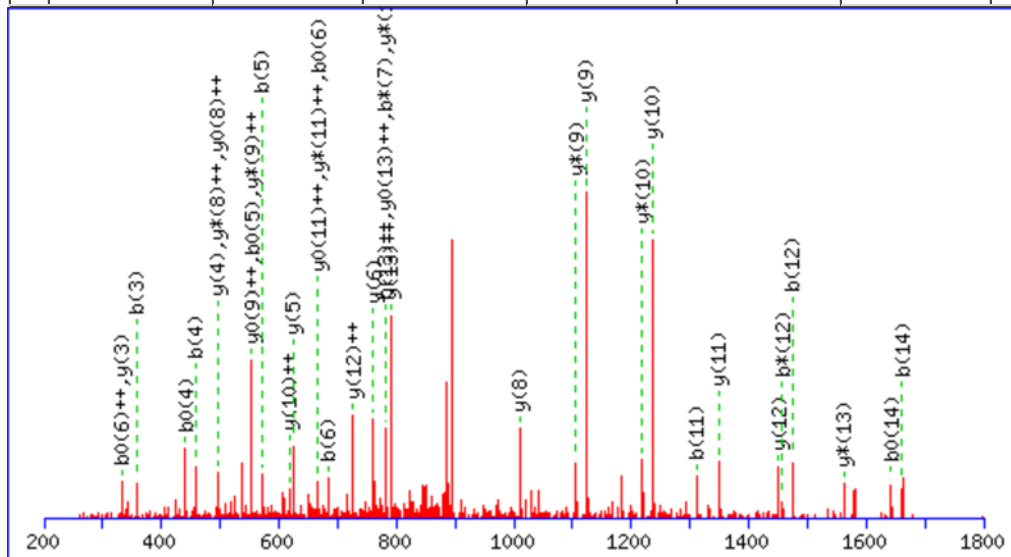

## Peptide View

MS/MS Fragmentation of **SLRSDDTAVYYCAR**

Found in **IP100829701**, Tax\_Id=9606 Gene\_Symbol=LOC100292483;LOC100290448 similar to pre-B lymphocyte gene 2

Experiment: 14 - S\_E-2 Fraction: S\_E-2



Match to Query 12124: 1675.763248 from(838.888900,2+)

Title: OECHL100312\_36.9105.9105.2.dta

Data file \\Boromir\masse\Data LTQ-Orbitrap\Chrystelle Lacroix\Etude clinique sJPU\OECHL100312\_36.raw

**Monoisotopic mass of neutral peptide Mr(calc): 1675.762405**Fixed modifications: Carbamidomethyl (C) (apply to specified residues or termini only)**Ions Score: 50****Expect: 0.00087**Matches : 11/138 fragment ions using 14 most intense peaks ([help](#))

| #  | b                  | b <sup>++</sup> | b*          | b <sup>+++</sup> | b <sup>0</sup> | b <sup>0++</sup> | Seq. | y                  | y <sup>++</sup> | y*          | y <sup>+++</sup> | y <sup>0</sup> | y <sup>0++</sup> | #  |
|----|--------------------|-----------------|-------------|------------------|----------------|------------------|------|--------------------|-----------------|-------------|------------------|----------------|------------------|----|
| 1  | 88.039304          | 44.523290       |             |                  | 70.028739      | 35.518008        | S    |                    |                 |             |                  |                |                  | 14 |
| 2  | 201.123368         | 101.065322      |             |                  | 183.112803     | 92.060039        | L    | 1589.737669        | 795.372472      | 1572.711120 | 786.859198       | 1571.727104    | 786.367190       | 13 |
| 3  | <b>357.224479</b>  | 179.115877      | 340.197930  | 170.602603       | 339.213914     | 170.110595       | R    | 1476.653605        | 738.830441      | 1459.627056 | 730.317166       | 1458.643040    | 729.825158       | 12 |
| 4  | <b>444.256507</b>  | 222.631891      | 427.229958  | 214.118617       | 426.245942     | 213.626609       | S    | <b>1320.552494</b> | 660.779885      | 1303.525945 | 652.266611       | 1302.541929    | 651.774603       | 11 |
| 5  | <b>559.283450</b>  | 280.145363      | 542.256901  | 271.632089       | 541.272885     | 271.140081       | D    | <b>1233.520466</b> | 617.263871      | 1216.493917 | 608.750597       | 1215.509901    | 608.258588       | 10 |
| 6  | <b>674.310393</b>  | 337.658835      | 657.283844  | 329.145560       | 656.299828     | 328.653552       | D    | <b>1118.493523</b> | 559.750399      | 1101.466974 | 551.237125       | 1100.482958    | 550.745117       | 9  |
| 7  | 775.358072         | 388.182674      | 758.331523  | 379.669400       | 757.347507     | 379.177392       | T    | <b>1003.466580</b> | 502.236928      | 986.440031  | 493.723654       | 985.456015     | 493.231646       | 8  |
| 8  | 846.395186         | 423.701231      | 829.368637  | 415.187956       | 828.384621     | 414.695948       | A    | <b>902.418901</b>  | 451.713089      | 885.392352  | 443.199814       |                |                  | 7  |
| 9  | 945.463600         | 473.235438      | 928.437051  | 464.722163       | 927.453035     | 464.230155       | V    | 831.381787         | 416.194532      | 814.355238  | 407.681257       |                |                  | 6  |
| 10 | 1108.526929        | 554.767102      | 1091.500380 | 546.253828       | 1090.516364    | 545.761820       | Y    | 732.313373         | 366.660325      | 715.286824  | 358.147050       |                |                  | 5  |
| 11 | 1271.590258        | 636.298767      | 1254.563709 | 627.785493       | 1253.579693    | 627.293484       | Y    | 569.250044         | 285.128660      | 552.223495  | 276.615386       |                |                  | 4  |
| 12 | <b>1431.620907</b> | 716.314092      | 1414.594358 | 707.800817       | 1413.610342    | 707.308809       | C    | 406.186715         | 203.596995      | 389.160166  | 195.083721       |                |                  | 3  |
| 13 | <b>1502.658021</b> | 751.832649      | 1485.631472 | 743.319374       | 1484.647456    | 742.827366       | A    | 246.156066         | 123.581671      | 229.129517  | 115.068396       |                |                  | 2  |
| 14 |                    |                 |             |                  |                |                  | R    | 175.118952         | 88.063114       | 158.092403  | 79.549839        |                |                  | 1  |

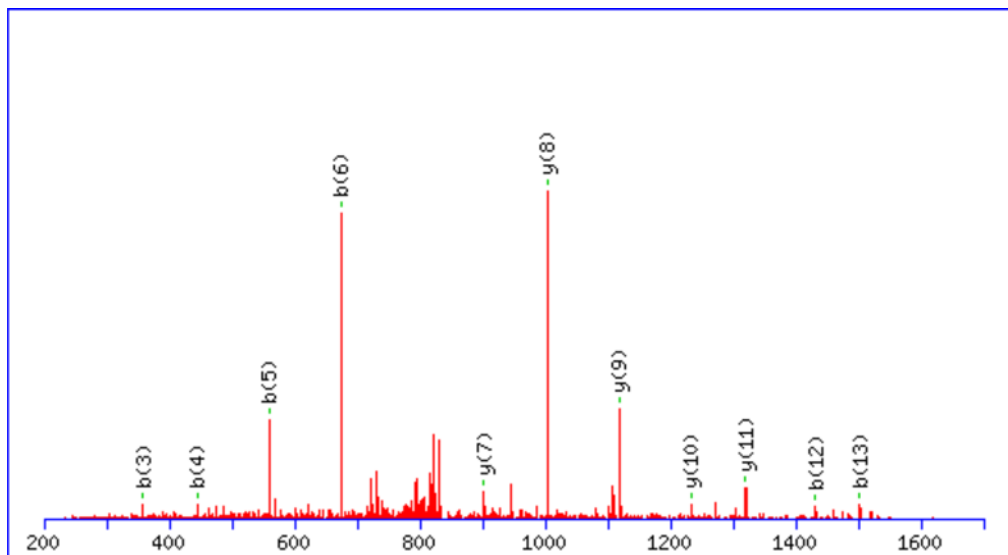

## Peptide View

MS/MS Fragmentation of **HLAQVGDSMDR**

Found in **IPI00413587**, Tax\_Id=9606 Gene\_Symbol=BID Isoform 1 of BH3-interacting domain death agonist

**Experiment:** 14 - S\_E-2 **Fraction:** S\_E-2

Match to Query 7318: 1227.567448 from(614.791000,2+)

Title: OECHL100312\_36.5548.5548.2.dta

Data file \\Boromir\masse\Data LTQ-Orbitrap\Chrystelle Lacroix\Etude clinique sJPU\OECHL100312\_36.raw

**Monoisotopic mass of neutral peptide Mr(calc):** 1227.566620 **Fixed modifications:** Carbamidomethyl (C) (apply to specified residues or termini only) **Ions Score:** 55

**Expect:** 0.00024 **Matches :** 10/100 fragment ions using 11 most intense peaks ([help](#))

| # | b                 | b <sup>++</sup> | b*         | b <sup>*++</sup> | b <sup>0</sup> | b <sup>0++</sup> | Seq. | y                  | y <sup>++</sup> | y*          | y <sup>*++</sup> | y <sup>0</sup> | y <sup>0++</sup> | #  |
|---|-------------------|-----------------|------------|------------------|----------------|------------------|------|--------------------|-----------------|-------------|------------------|----------------|------------------|----|
| 1 | 138.066188        | 69.536732       |            |                  |                |                  | H    |                    |                 |             |                  |                |                  | 11 |
| 2 | <b>251.150252</b> | 126.078764      |            |                  |                |                  | L    | <b>1091.514985</b> | 546.261131      | 1074.488436 | 537.747856       | 1073.504420    | 537.255848       | 10 |
| 3 | 322.187366        | 161.597321      |            |                  |                |                  | A    | <b>978.430921</b>  | 489.719099      | 961.404372  | 481.205824       | 960.420356     | 480.713816       | 9  |
| 4 | <b>450.245944</b> | 225.626610      | 433.219395 | 217.113335       |                |                  | Q    | <b>907.393807</b>  | 454.200542      | 890.367258  | 445.687267       | 889.383242     | 445.195259       | 8  |
| 5 | 549.314358        | 275.160817      | 532.287809 | 266.647542       |                |                  | V    | <b>779.335229</b>  | 390.171253      | 762.308680  | 381.657978       | 761.324664     | 381.165970       | 7  |
| 6 | <b>606.335822</b> | 303.671549      | 589.309273 | 295.158275       |                |                  | G    | <b>680.266815</b>  | 340.637046      | 663.240266  | 332.123771       | 662.256250     | 331.631763       | 6  |

|    |             |            |             |            |             |            |   |            |            |            |            |            |            |   |
|----|-------------|------------|-------------|------------|-------------|------------|---|------------|------------|------------|------------|------------|------------|---|
| 7  | 721.362765  | 361.185021 | 704.336216  | 352.671746 | 703.352200  | 352.179738 | D | 623.245351 | 312.126314 | 606.218802 | 303.613039 | 605.234786 | 303.121031 | 5 |
| 8  | 808.394793  | 404.701034 | 791.368244  | 396.187760 | 790.384228  | 395.695752 | S | 508.218408 | 254.612842 | 491.191859 | 246.099567 | 490.207843 | 245.607559 | 4 |
| 9  | 939.435278  | 470.221277 | 922.408729  | 461.708002 | 921.424713  | 461.215994 | M | 421.186380 | 211.096828 | 404.159831 | 202.583553 | 403.175815 | 202.091546 | 3 |
| 10 | 1054.462221 | 527.734749 | 1037.435672 | 519.221474 | 1036.451656 | 518.729466 | D | 290.145895 | 145.576585 | 273.119346 | 137.063311 | 272.135330 | 136.571303 | 2 |
| 11 |             |            |             |            |             |            | R | 175.118952 | 88.063114  | 158.092403 | 79.549839  |            |            | 1 |

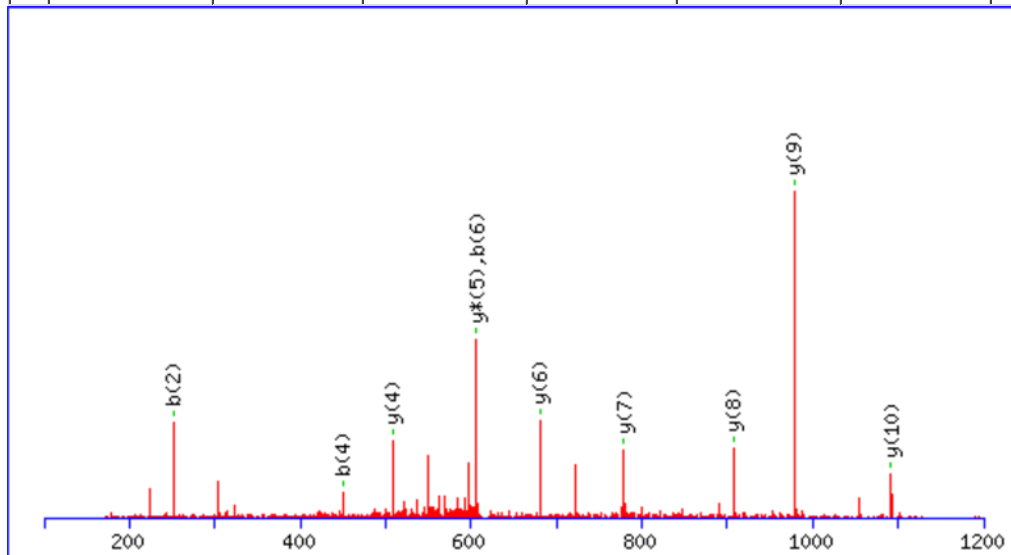

## Peptide View

MS/MS Fragmentation of **GLGDDTALNDAR**

Found in **IPI00216914**, Tax\_Id=9606 Gene\_Symbol=VMO1 Vitelline membrane outer layer protein 1 homolog

Experiment: 59 - PyE-2 Fraction: PyE-2

Match to Query 7716: 1216.568048 from(609.291300,2+)

Title: OECHL100312\_34.8866.8866.2.dta

Data file \\Boromir\masse\Data LTQ-Orbitrap\Chrystelle Lacroix\Etude clinique sJPU\OECHL100312\_34.raw

**Monoisotopic mass of neutral peptide Mr(calc):** 1216.568390 **Fixed modifications:** Carbamidomethyl (C) (apply to specified residues or termini only) **Ions Score:** 78

**Expect:** 1.1e-006 **Matches :** 33/106 fragment ions using 41 most intense peaks ([help](#))

| # | b         | b <sup>++</sup> | b* | b <sup>*++</sup> | b <sup>0</sup> | b <sup>0++</sup> | Seq. | y | y <sup>++</sup> | y* | y <sup>*++</sup> | y <sup>0</sup> | y <sup>0++</sup> | #  |
|---|-----------|-----------------|----|------------------|----------------|------------------|------|---|-----------------|----|------------------|----------------|------------------|----|
| 1 | 58.028740 | 29.518008       |    |                  |                |                  | G    |   |                 |    |                  |                |                  | 12 |

|    |                   |                   |                   |            |                   |            |   |                    |                   |                   |                   |                   |                   |    |
|----|-------------------|-------------------|-------------------|------------|-------------------|------------|---|--------------------|-------------------|-------------------|-------------------|-------------------|-------------------|----|
| 2  | 171.112804        | 86.060040         |                   |            |                   |            | L | 1160.554207        | 580.780742        | 1143.527658       | 572.267467        | 1142.543642       | 571.775459        | 11 |
| 3  | <b>228.134268</b> | 114.570772        |                   |            |                   |            | G | <b>1047.470143</b> | <b>524.238710</b> | 1030.443594       | 515.725435        | 1029.459578       | <b>515.233427</b> | 10 |
| 4  | <b>343.161211</b> | 172.084243        |                   |            | 325.150646        | 163.078961 | D | <b>990.448679</b>  | 495.727978        | <b>973.422130</b> | 487.214703        | <b>972.438114</b> | 486.722695        | 9  |
| 5  | <b>458.188154</b> | <b>229.597715</b> |                   |            | 440.177589        | 220.592433 | D | <b>875.421736</b>  | 438.214506        | 858.395187        | 429.701232        | <b>857.411171</b> | 429.209224        | 8  |
| 6  | <b>559.235833</b> | 280.121555        |                   |            | 541.225268        | 271.116272 | T | <b>760.394793</b>  | 380.701035        | <b>743.368244</b> | 372.187760        | 742.384228        | 371.695752        | 7  |
| 7  | 630.272947        | 315.640112        |                   |            | 612.262382        | 306.634829 | A | <b>659.347114</b>  | 330.177195        | 642.320565        | 321.663921        | 641.336549        | 321.171913        | 6  |
| 8  | <b>743.357011</b> | 372.182144        |                   |            | <b>725.346446</b> | 363.176861 | L | <b>588.310000</b>  | 294.658638        | 571.283451        | 286.145364        | 570.299435        | 285.653356        | 5  |
| 9  | <b>857.399938</b> | 429.203607        | <b>840.373389</b> | 420.690333 | <b>839.389373</b> | 420.198325 | N | <b>475.225936</b>  | 238.116606        | <b>458.199387</b> | <b>229.603331</b> | 457.215371        | <b>229.111323</b> | 4  |
| 10 | <b>972.426881</b> | 486.717079        | 955.400332        | 478.203804 | <b>954.416316</b> | 477.711796 | D | <b>361.183009</b>  | 181.095142        | 344.156460        | 172.581868        | <b>343.172444</b> | 172.089860        | 3  |
| 11 | 1043.463995       | 522.235636        | 1026.437446       | 513.722361 | 1025.453430       | 513.230353 | A | <b>246.156066</b>  | 123.581671        | <b>229.129517</b> | 115.068397        |                   |                   | 2  |
| 12 |                   |                   |                   |            |                   |            | R | <b>175.118952</b>  | 88.063114         | 158.092403        | 79.549839         |                   |                   | 1  |

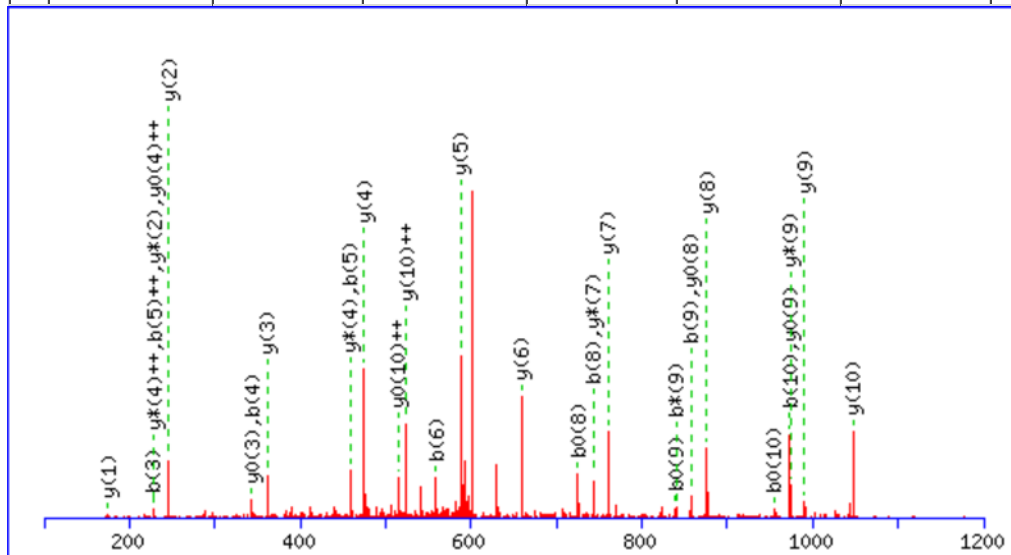

## Peptide View

MS/MS Fragmentation of **AVGLLTVISK**

Found in **IP100013446**, Tax\_Id=9606 Gene\_Symbol=PSCA Prostate stem cell antigen

Experiment: 59 - PyE-2 Fraction: PyE-2

Match to Query 4311: 999.633048 from(500.823800,2+)

Title: OECHL100312\_34.17458.17458.2.dta

Data file \\Boromir\masse\Data LTQ-Orbitrap\Chrystelle Lacroix\Etude clinique sJPU\OECHL100312\_34.raw

**Monoisotopic mass of neutral peptide Mr(calc):** 999.632828**Fixed modifications:** Carbamidomethyl (C) (apply to specified residues or termini only)**Ions Score:** 53**Expect:** 5.7e-005**Matches :** 15/78 fragment ions using 33 most intense peaks ([help](#))

| #  | b                 | b <sup>++</sup>   | b <sup>0</sup> | b <sup>0++</sup> | Seq. | y                 | y <sup>++</sup> | y*         | y* <sup>++</sup> | y <sup>0</sup> | y <sup>0++</sup> | #  |
|----|-------------------|-------------------|----------------|------------------|------|-------------------|-----------------|------------|------------------|----------------|------------------|----|
| 1  | 72.044390         | 36.525833         |                |                  | A    |                   |                 |            |                  |                |                  | 10 |
| 2  | <b>171.112804</b> | 86.060040         |                |                  | V    | 929.602995        | 465.305136      | 912.576446 | 456.791861       | 911.592430     | 456.299853       | 9  |
| 3  | <b>228.134268</b> | 114.570772        |                |                  | G    | <b>830.534581</b> | 415.770929      | 813.508032 | 407.257654       | 812.524016     | 406.765646       | 8  |
| 4  | <b>341.218332</b> | <b>171.112804</b> |                |                  | L    | <b>773.513117</b> | 387.260197      | 756.486568 | 378.746922       | 755.502552     | 378.254914       | 7  |
| 5  | <b>454.302396</b> | 227.654836        |                |                  | L    | <b>660.429053</b> | 330.718165      | 643.402504 | 322.204890       | 642.418488     | 321.712882       | 6  |
| 6  | <b>555.350075</b> | 278.178676        | 537.339510     | 269.173393       | T    | <b>547.344989</b> | 274.176133      | 530.318440 | 265.662858       | 529.334424     | 265.170850       | 5  |
| 7  | <b>654.418489</b> | 327.712883        | 636.407924     | 318.707600       | V    | 446.297310        | 223.652293      | 429.270761 | 215.139018       | 428.286745     | 214.647010       | 4  |
| 8  | <b>767.502553</b> | 384.254915        | 749.491988     | 375.249632       | I    | <b>347.228896</b> | 174.118086      | 330.202347 | 165.604811       | 329.218331     | 165.112803       | 3  |
| 9  | <b>854.534581</b> | 427.770929        | 836.524016     | 418.765646       | S    | <b>234.144832</b> | 117.576054      | 217.118283 | 109.062779       | 216.134267     | 108.570771       | 2  |
| 10 |                   |                   |                |                  | K    | 147.112804        | 74.060040       | 130.086255 | 65.546765        |                |                  | 1  |

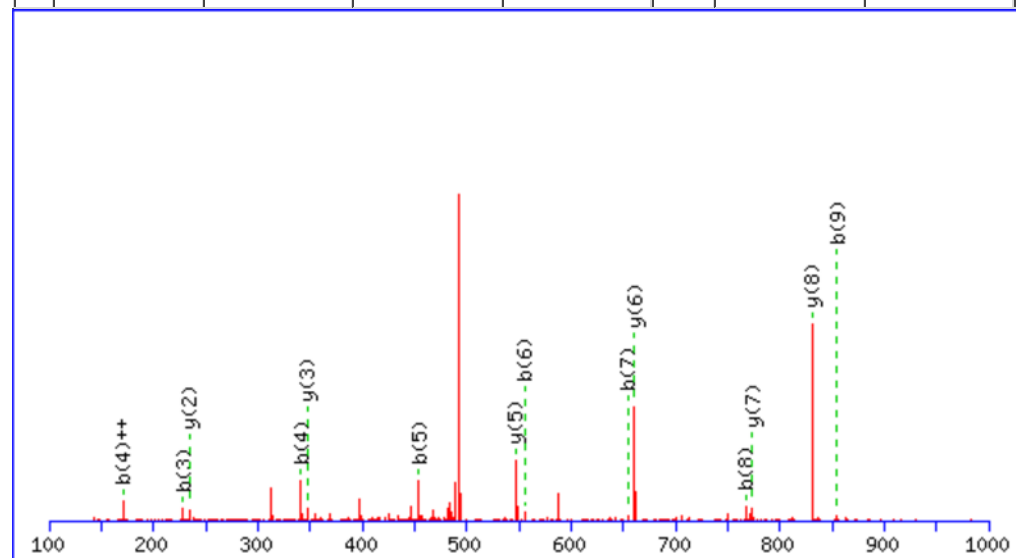

## Peptide View

MS/MS Fragmentation of **STVEELHEPIPSLFR**Found in **IPI00410487**, Tax\_Id=9606 Gene\_Symbol=TWSG1 Isoform 1 of Twisted gastrulation protein homolog 1**Experiment:** 59 - PyE-2 **Fraction:** PyE-2

Match to Query 13829: 1752.907048 from(877.460800,2+)

Title: OECHL100312\_34.17772.17772.2.dta

Data file \\Boromir\masse\Data LTQ-Orbitrap\Chrystelle Lacroix\Etude clinique sJPU\OECHL100312\_34.raw

**Monoisotopic mass of neutral peptide Mr(calc):** 1752.904633**Fixed modifications:** Carbamidomethyl (C) (apply to specified residues or termini only)**Ions Score:** 68**Expect:** 1.6e-005**Matches :** 36/134 fragment ions using 72 most intense peaks ([help](#))

| #  | b                  | b <sup>++</sup>   | b <sup>0</sup>     | b <sup>0++</sup> | Seq. | y                  | y <sup>++</sup>   | y <sup>*</sup>    | y <sup>*++</sup>  | y <sup>0</sup>     | y <sup>0++</sup>  | #  |
|----|--------------------|-------------------|--------------------|------------------|------|--------------------|-------------------|-------------------|-------------------|--------------------|-------------------|----|
| 1  | 88.039304          | 44.523290         | 70.028739          | 35.518008        | S    |                    |                   |                   |                   |                    |                   | 15 |
| 2  | 189.086983         | 95.047129         | 171.076418         | 86.041847        | T    | 1666.879898        | 833.943587        | 1649.853349       | 825.430313        | 1648.869333        | 824.938304        | 14 |
| 3  | <b>288.155397</b>  | 144.581336        | 270.144832         | 135.576054       | V    | <b>1565.832219</b> | 783.419748        | 1548.805670       | 774.906473        | 1547.821654        | 774.414465        | 13 |
| 4  | <b>417.197990</b>  | 209.102633        | <b>399.187425</b>  | 200.097351       | E    | <b>1466.763805</b> | <b>733.885541</b> | 1449.737256       | 725.372266        | 1448.753240        | 724.880258        | 12 |
| 5  | <b>546.240583</b>  | 273.623930        | <b>528.230018</b>  | 264.618647       | E    | <b>1337.721212</b> | <b>669.364244</b> | 1320.694663       | <b>660.850970</b> | <b>1319.710647</b> | <b>660.358961</b> | 11 |
| 6  | <b>659.324647</b>  | 330.165962        | <b>641.314082</b>  | 321.160679       | L    | <b>1208.678619</b> | 604.842948        | 1191.652070       | 596.329673        | 1190.668054        | 595.837665        | 10 |
| 7  | <b>796.383559</b>  | 398.695418        | 778.372994         | 389.690135       | H    | <b>1095.594555</b> | <b>548.300915</b> | 1078.568006       | 539.787641        | 1077.583990        | 539.295633        | 9  |
| 8  | <b>925.426152</b>  | 463.216714        | <b>907.415587</b>  | 454.211432       | E    | <b>958.535643</b>  | 479.771460        | 941.509094        | 471.258185        | 940.525078         | 470.766177        | 8  |
| 9  | <b>1022.478916</b> | 511.743096        | 1004.468351        | 502.737814       | P    | <b>829.493050</b>  | 415.250163        | 812.466501        | 406.736889        | 811.482485         | 406.244881        | 7  |
| 10 | <b>1135.562980</b> | 568.285128        | 1117.552415        | 559.279845       | I    | 732.440286         | 366.723781        | 715.413737        | 358.210507        | 714.429721         | 357.718499        | 6  |
| 11 | <b>1232.615744</b> | 616.811510        | 1214.605179        | 607.806227       | P    | <b>619.356222</b>  | 310.181749        | <b>602.329673</b> | 301.668475        | 601.345657         | 301.176467        | 5  |
| 12 | <b>1319.647772</b> | <b>660.327524</b> | <b>1301.637207</b> | 651.322242       | S    | 522.303458         | 261.655367        | 505.276909        | 253.142093        | 504.292893         | 252.650085        | 4  |
| 13 | <b>1432.731836</b> | 716.869556        | <b>1414.721271</b> | 707.864273       | L    | 435.271430         | 218.139353        | 418.244881        | 209.626078        |                    |                   | 3  |
| 14 | <b>1579.800250</b> | 790.403763        | <b>1561.789685</b> | 781.398481       | F    | <b>322.187366</b>  | 161.597321        | 305.160817        | 153.084047        |                    |                   | 2  |
| 15 |                    |                   |                    |                  | R    | 175.118952         | 88.063114         | 158.092403        | 79.549839         |                    |                   | 1  |

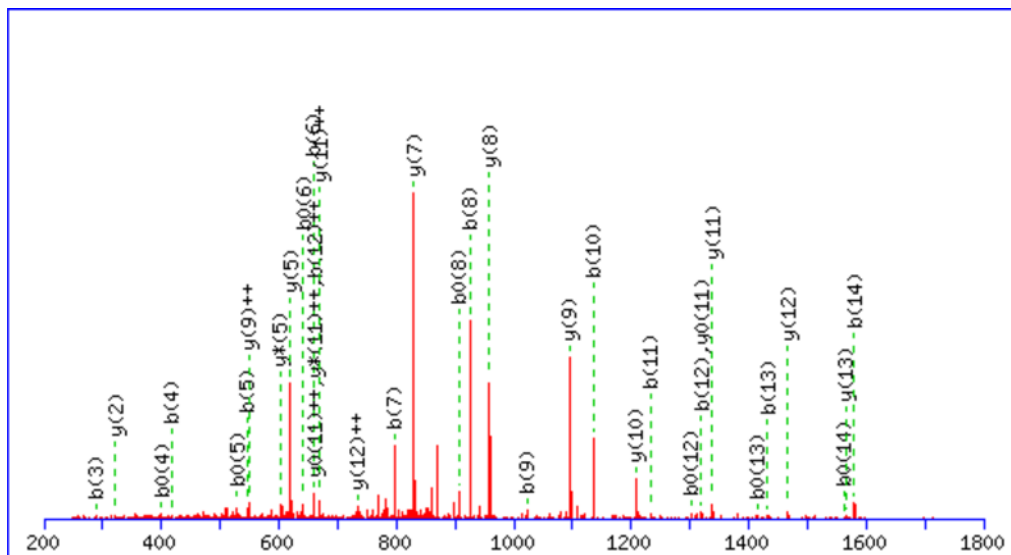

## Peptide View

MS/MS Fragmentation of **AISSIGLECQSVTSRGDLATCPR**

Found in **IPI00006988**, Tax\_Id=9606 Gene\_Symbol=RETN Resistin

**Experiment:** 59 - PyE-2 **Fraction:** PyE-2

Match to Query 17580: 2477.199372 from(826.740400,3+)

Title: OECHL100312\_34.13936.13936.3.dta

Data file \\Boromir\masse\Data LTQ-Orbitrap\Chrystelle Lacroix\Etude clinique sJPU\OECHL100312\_34.raw

**Monoisotopic mass of neutral peptide Mr(calc):** 2477.200256 **Fixed modifications:** Carbamidomethyl (C) (apply to specified residues or termini only) **Ions Score:** 66

**Expect:** 5.3e-005 **Matches :** 32/236 fragment ions using 46 most intense peaks ([help](#))

| # | b                 | b <sup>++</sup> | b* | b* <sup>++</sup> | b <sup>0</sup>    | b <sup>0</sup> <sup>++</sup> | Seq. | y           | y <sup>++</sup>    | y*          | y* <sup>++</sup>   | y <sup>0</sup> | y <sup>0</sup> <sup>++</sup> |
|---|-------------------|-----------------|----|------------------|-------------------|------------------------------|------|-------------|--------------------|-------------|--------------------|----------------|------------------------------|
| 1 | 72.044390         | 36.525833       |    |                  |                   |                              | A    |             |                    |             |                    |                |                              |
| 2 | 185.128454        | 93.067865       |    |                  |                   |                              | I    | 2407.170421 | 1204.088848        | 2390.143872 | 1195.575574        | 2389.159856    | 1195.0835                    |
| 3 | <b>272.160482</b> | 136.583879      |    |                  | 254.149917        | 127.578596                   | S    | 2294.086357 | <b>1147.546816</b> | 2277.059808 | <b>1139.033542</b> | 2276.075792    | 1138.5415                    |
| 4 | <b>359.192510</b> | 180.099893      |    |                  | <b>341.181945</b> | 171.094610                   | S    | 2207.054329 | <b>1104.030802</b> | 2190.027780 | 1095.517528        | 2189.043764    | 1095.0255                    |
| 5 | <b>472.276574</b> | 236.641925      |    |                  | <b>454.266009</b> | 227.636642                   | I    | 2120.022301 | <b>1060.514788</b> | 2102.995752 | 1052.001514        | 2102.011736    | 1051.5095                    |
| 6 | <b>529.298038</b> | 265.152657      |    |                  | 511.287473        | 256.147375                   | G    | 2006.938237 | <b>1003.972757</b> | 1989.911688 | 995.459482         | 1988.927672    | 994.9674                     |

|    |             |             |             |             |             |             |   |             |            |             |            |             |          |
|----|-------------|-------------|-------------|-------------|-------------|-------------|---|-------------|------------|-------------|------------|-------------|----------|
| 7  | 642.382102  | 321.694689  |             |             | 624.371537  | 312.689407  | L | 1949.916773 | 975.462025 | 1932.890224 | 966.948750 | 1931.906208 | 966.4567 |
| 8  | 771.424695  | 386.215986  |             |             | 753.414130  | 377.210703  | E | 1836.832709 | 918.919993 | 1819.806160 | 910.406718 | 1818.822144 | 909.9147 |
| 9  | 931.455344  | 466.231310  |             |             | 913.444779  | 457.226028  | C | 1707.790116 | 854.398696 | 1690.763567 | 845.885422 | 1689.779551 | 845.3934 |
| 10 | 1059.513922 | 530.260599  | 1042.487373 | 521.747325  | 1041.503357 | 521.255317  | Q | 1547.759467 | 774.383372 | 1530.732918 | 765.870097 | 1529.748902 | 765.3780 |
| 11 | 1146.545950 | 573.776613  | 1129.519401 | 565.263339  | 1128.535385 | 564.771331  | S | 1419.700889 | 710.354083 | 1402.674340 | 701.840808 | 1401.690324 | 701.3488 |
| 12 | 1245.614364 | 623.310820  | 1228.587815 | 614.797546  | 1227.603799 | 614.305538  | V | 1332.668861 | 666.838069 | 1315.642312 | 658.324794 | 1314.658296 | 657.8327 |
| 13 | 1346.662043 | 673.834660  | 1329.635494 | 665.321385  | 1328.651478 | 664.829377  | T | 1233.600447 | 617.303862 | 1216.573898 | 608.790587 | 1215.589882 | 608.2985 |
| 14 | 1433.694071 | 717.350674  | 1416.667522 | 708.837399  | 1415.683506 | 708.345391  | S | 1132.552768 | 566.780022 | 1115.526219 | 558.266748 | 1114.542203 | 557.7747 |
| 15 | 1589.795182 | 795.401229  | 1572.768633 | 786.887955  | 1571.784617 | 786.395947  | R | 1045.520740 | 523.264008 | 1028.494191 | 514.750734 | 1027.510175 | 514.2587 |
| 16 | 1646.816646 | 823.911961  | 1629.790097 | 815.398687  | 1628.806081 | 814.906679  | G | 889.419629  | 445.213453 | 872.393080  | 436.700178 | 871.409064  | 436.2081 |
| 17 | 1761.843589 | 881.425433  | 1744.817040 | 872.912158  | 1743.833024 | 872.420150  | D | 832.398165  | 416.702721 | 815.371616  | 408.189446 | 814.387600  | 407.6974 |
| 18 | 1874.927653 | 937.967465  | 1857.901104 | 929.454190  | 1856.917088 | 928.962182  | L | 717.371222  | 359.189249 | 700.344673  | 350.675975 | 699.360657  | 350.1839 |
| 19 | 1945.964767 | 973.486022  | 1928.938218 | 964.972747  | 1927.954202 | 964.480739  | A | 604.287158  | 302.647217 | 587.260609  | 294.133943 | 586.276593  | 293.6419 |
| 20 | 2047.012446 | 1024.009861 | 2029.985897 | 1015.496587 | 2029.001881 | 1015.004579 | T | 533.250044  | 267.128660 | 516.223495  | 258.615386 | 515.239479  | 258.1233 |
| 21 | 2207.043095 | 1104.025185 | 2190.016546 | 1095.511911 | 2189.032530 | 1095.019903 | C | 432.202365  | 216.604820 | 415.175816  | 208.091546 |             |          |
| 22 | 2304.095859 | 1152.551567 | 2287.069310 | 1144.038293 | 2286.085294 | 1143.546285 | P | 272.171716  | 136.589496 | 255.145167  | 128.076221 |             |          |
| 23 |             |             |             |             |             |             | R | 175.118952  | 88.063114  | 158.092403  | 79.549839  |             |          |

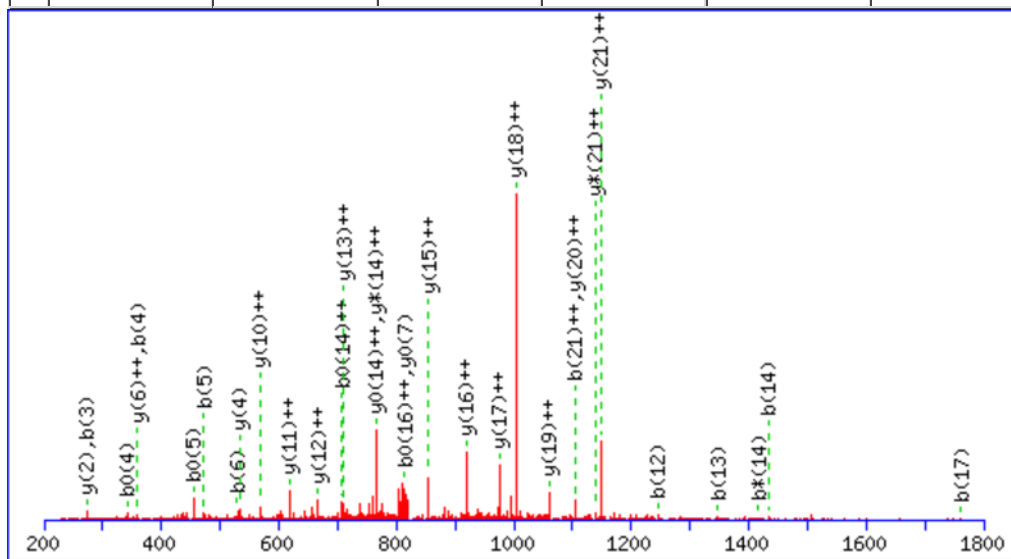



## Peptide View

MS/MS Fragmentation of **QGGFLGLSNIK**

Found in **IPI00013955**, Tax\_Id=9606 Gene\_Symbol=MUC1 Isoform 1 of Mucin-1

**Experiment:** 59 - PyE-2 **Fraction:** PyE-2

Match to Query 6518: 1132.623848 from(567.319200,2+)

Title: OECHL100312\_34.17051.17051.2.dta

Data file \\Boromir\masse\Data LTQ-Orbitrap\Chrystelle Lacroix\Etude clinique sJPU\OECHL100312\_34.raw

**Monoisotopic mass of neutral peptide Mr(calc):** 1132.624054 **Fixed modifications:** Carbamidomethyl (C) (apply to specified residues or termini only) **Ions Score:** 62

**Expect:** 4.2e-005 **Matches :** 23/100 fragment ions using 40 most intense peaks ([help](#))

| #  | b                 | b <sup>++</sup> | b*                | b* <sup>++</sup>  | b <sup>0</sup> | b <sup>0++</sup> | Seq. | y                  | y <sup>++</sup> | y*                | y* <sup>++</sup> | y <sup>0</sup>    | y <sup>0++</sup> | #  |
|----|-------------------|-----------------|-------------------|-------------------|----------------|------------------|------|--------------------|-----------------|-------------------|------------------|-------------------|------------------|----|
| 1  | 129.065854        | 65.036565       | 112.039305        | 56.523291         |                |                  | Q    |                    |                 |                   |                  |                   |                  | 11 |
| 2  | <b>186.087318</b> | 93.547297       | 169.060769        | 85.034023         |                |                  | G    | <b>1005.572757</b> | 503.290017      | 988.546208        | 494.776742       | <b>987.562192</b> | 494.284734       | 10 |
| 3  | <b>243.108782</b> | 122.058029      | 226.082233        | 113.544755        |                |                  | G    | <b>948.551293</b>  | 474.779285      | 931.524744        | 466.266010       | 930.540728        | 465.774002       | 9  |
| 4  | 390.177196        | 195.592236      | <b>373.150647</b> | 187.078962        |                |                  | F    | <b>891.529829</b>  | 446.268553      | <b>874.503280</b> | 437.755278       | 873.519264        | 437.263270       | 8  |
| 5  | 503.261260        | 252.134268      | <b>486.234711</b> | <b>243.620994</b> |                |                  | L    | <b>744.461415</b>  | 372.734346      | 727.434866        | 364.221071       | 726.450850        | 363.729063       | 7  |
| 6  | 560.282724        | 280.645000      | 543.256175        | 272.131726        |                |                  | G    | <b>631.377351</b>  | 316.192314      | 614.350802        | 307.679039       | 613.366786        | 307.187031       | 6  |
| 7  | <b>673.366788</b> | 337.187032      | <b>656.340239</b> | 328.673758        |                |                  | L    | <b>574.355887</b>  | 287.681582      | 557.329338        | 279.168307       | 556.345322        | 278.676299       | 5  |
| 8  | 760.398816        | 380.703046      | 743.372267        | 372.189772        | 742.388251     | 371.697764       | S    | <b>461.271823</b>  | 231.139550      | 444.245274        | 222.626275       | 443.261258        | 222.134267       | 4  |
| 9  | <b>874.441743</b> | 437.724510      | 857.415194        | 429.211235        | 856.431178     | 428.719227       | N    | <b>374.239795</b>  | 187.623536      | 357.213246        | 179.110261       |                   |                  | 3  |
| 10 | <b>987.525807</b> | 494.266542      | <b>970.499258</b> | <b>485.753267</b> | 969.515242     | 485.261259       | I    | <b>260.196868</b>  | 130.602072      | <b>243.170319</b> | 122.088798       |                   |                  | 2  |
| 11 |                   |                 |                   |                   |                |                  | K    | 147.112804         | 74.060040       | 130.086255        | 65.546766        |                   |                  | 1  |

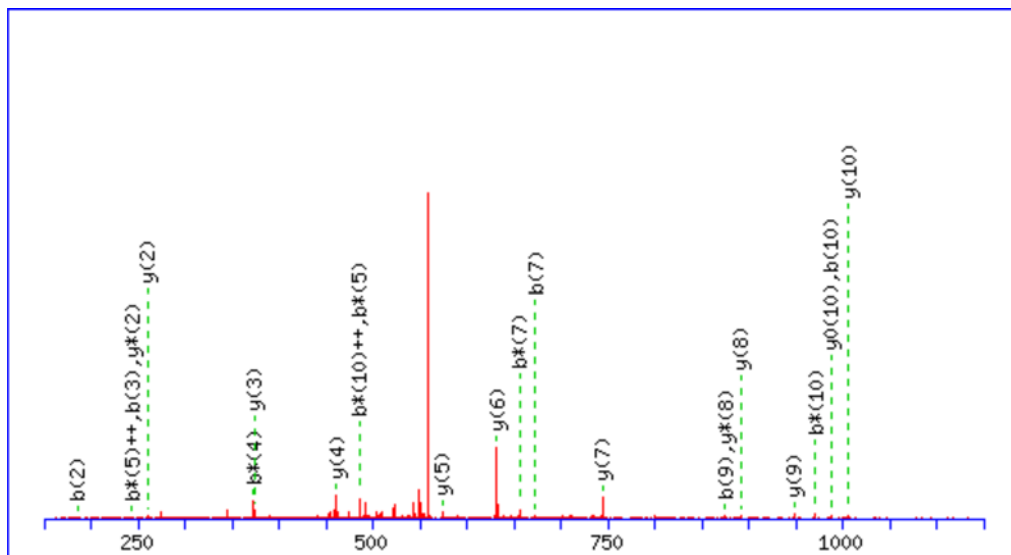

## Peptide View

MS/MS Fragmentation of **CLQCQMCDPAMGLR**

Found in **IPI00024331**, Tax\_Id=9606 Gene\_Symbol=TNFRSF14 Tumor necrosis factor receptor superfamily member 14

**Experiment:** 59 - PyE-2 **Fraction:** PyE-2

Match to Query 13750: 1738.709048 from(870.361800,2+)

Title: OECHL100312\_34.14252.14252.2.dta

Data file \\Boromir\masse\Data LTQ-Orbitrap\Chrystelle Lacroix\Etude clinique sJPU\OECHL100312\_34.raw

**Monoisotopic mass of neutral peptide Mr(calc):** 1738.708160 **Fixed modifications:** Carbamidomethyl (C) (apply to specified residues or termini only) **Ions Score:** 78

**Expect:** 3.2e-007 **Matches :** 23/126 fragment ions using 28 most intense peaks ([help](#))

| # | b                 | b <sup>++</sup>   | b*                | b <sup>*++</sup>  | b <sup>0</sup> | b <sup>0++</sup> | Seq. | y                  | y <sup>++</sup>   | y*          | y <sup>*++</sup>  | y <sup>0</sup> | y <sup>0++</sup>  | #  |
|---|-------------------|-------------------|-------------------|-------------------|----------------|------------------|------|--------------------|-------------------|-------------|-------------------|----------------|-------------------|----|
| 1 | 161.037925        | 81.022600         |                   |                   |                |                  | C    |                    |                   |             |                   |                |                   | 14 |
| 2 | 274.121989        | 137.564632        |                   |                   |                |                  | L    | 1579.684789        | 790.346032        | 1562.658240 | 781.832758        | 1561.674224    | 781.340750        | 13 |
| 3 | <b>402.180567</b> | 201.593921        | <b>385.154018</b> | 193.080647        |                |                  | Q    | <b>1466.600725</b> | <b>733.804001</b> | 1449.574176 | <b>725.290726</b> | 1448.590160    | <b>724.798718</b> | 12 |
| 4 | 562.211216        | 281.609246        | 545.184667        | 273.095972        |                |                  | C    | <b>1338.542147</b> | 669.774711        | 1321.515598 | 661.261437        | 1320.531582    | 660.769429        | 11 |
| 5 | 690.269794        | <b>345.638535</b> | 673.243245        | 337.125261        |                |                  | Q    | <b>1178.511498</b> | 589.759387        | 1161.484949 | 581.246113        | 1160.500933    | 580.754105        | 10 |
| 6 | <b>821.310279</b> | 411.158778        | 804.283730        | <b>402.645503</b> |                |                  | M    | <b>1050.452920</b> | 525.730098        | 1033.426371 | 517.216824        | 1032.442355    | 516.724815        | 9  |

|    |                    |            |                   |            |             |            |          |                   |            |            |            |            |            |          |
|----|--------------------|------------|-------------------|------------|-------------|------------|----------|-------------------|------------|------------|------------|------------|------------|----------|
| 7  | <b>981.340928</b>  | 491.174102 | <b>964.314379</b> | 482.660828 |             |            | <b>C</b> | <b>919.412435</b> | 460.209856 | 902.385886 | 451.696581 | 901.401870 | 451.204573 | <b>8</b> |
| 8  | <b>1096.367871</b> | 548.687574 | 1079.341322       | 540.174299 | 1078.357306 | 539.682291 | <b>D</b> | <b>759.381786</b> | 380.194531 | 742.355237 | 371.681256 | 741.371221 | 371.189248 | <b>7</b> |
| 9  | 1193.420635        | 597.213956 | 1176.394086       | 588.700681 | 1175.410070 | 588.208673 | <b>P</b> | <b>644.354843</b> | 322.681059 | 627.328294 | 314.167785 |            |            | <b>6</b> |
| 10 | 1264.457749        | 632.732513 | 1247.431200       | 624.219238 | 1246.447184 | 623.727230 | <b>A</b> | 547.302079        | 274.154677 | 530.275530 | 265.641403 |            |            | <b>5</b> |
| 11 | <b>1395.498234</b> | 698.252755 | 1378.471685       | 689.739481 | 1377.487669 | 689.247473 | <b>M</b> | <b>476.264965</b> | 238.636120 | 459.238416 | 230.122846 |            |            | <b>4</b> |
| 12 | 1452.519698        | 726.763487 | 1435.493149       | 718.250213 | 1434.509133 | 717.758205 | <b>G</b> | <b>345.224480</b> | 173.115878 | 328.197931 | 164.602603 |            |            | <b>3</b> |
| 13 | <b>1565.603762</b> | 783.305519 | 1548.577213       | 774.792245 | 1547.593197 | 774.300236 | <b>L</b> | <b>288.203016</b> | 144.605146 | 271.176467 | 136.091871 |            |            | <b>2</b> |
| 14 |                    |            |                   |            |             |            | <b>R</b> | 175.118952        | 88.063114  | 158.092403 | 79.549839  |            |            | <b>1</b> |

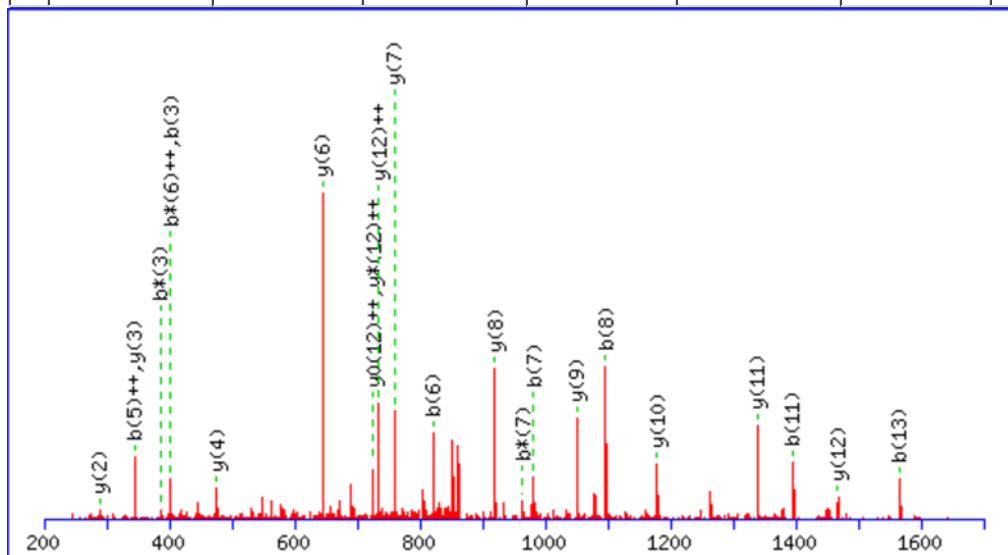

## Peptide View

MS/MS Fragmentation of **NIETIINTFHQYSVK**

Found in **IP100027462**, Tax\_Id=9606 Gene\_Symbol=S100A9 Protein S100-A9

**Experiment:** 59 - PyE-2 **Fraction:** PyE-2

Match to Query 14137: 1805.932848 from(903.973700,2+)

Title: OECHL100312\_34.20229.20229.2.dta

Data file \\Boromir\masse\Data LTQ-Orbitrap\Chrystelle Lacroix\Etude clinique sJPU\OECHL100312\_34.raw

**Monoisotopic mass of neutral peptide Mr(calc):** 1805.931183 **Fixed modifications:** Carbamidomethyl (C) (apply to specified residues or termini only) **Ions Score:** 78

**Expect:** 2e-006**Matches :** 16/160 fragment ions using 15 most intense peaks ([help](#))

| #  | b                  | b <sup>++</sup> | b*          | b <sup>*++</sup> | b <sup>0</sup>    | b <sup>0++</sup>  | Seq. | y                  | y <sup>++</sup>   | y*          | y <sup>*++</sup> | y <sup>0</sup> | y <sup>0++</sup>  | #  |
|----|--------------------|-----------------|-------------|------------------|-------------------|-------------------|------|--------------------|-------------------|-------------|------------------|----------------|-------------------|----|
| 1  | 115.050203         | 58.028740       | 98.023654   | 49.515465        |                   |                   | N    |                    |                   |             |                  |                |                   | 15 |
| 2  | 228.134267         | 114.570771      | 211.107718  | 106.057497       |                   |                   | I    | 1692.895549        | 846.951413        | 1675.869000 | 838.438138       | 1674.884984    | 837.946130        | 14 |
| 3  | 357.176860         | 179.092068      | 340.150311  | 170.578793       | 339.166295        | 170.086785        | E    | <b>1579.811485</b> | <b>790.409381</b> | 1562.784936 | 781.896106       | 1561.800920    | 781.404098        | 13 |
| 4  | 458.224539         | 229.615907      | 441.197990  | 221.102633       | <b>440.213974</b> | 220.610625        | T    | <b>1450.768892</b> | <b>725.888084</b> | 1433.742343 | 717.374810       | 1432.758327    | 716.882802        | 12 |
| 5  | 571.308603         | 286.157940      | 554.282054  | 277.644665       | <b>553.298038</b> | 277.152657        | I    | <b>1349.721213</b> | 675.364245        | 1332.694664 | 666.850970       | 1331.710648    | 666.358962        | 11 |
| 6  | 684.392667         | 342.699972      | 667.366118  | 334.186697       | 666.382102        | <b>333.694689</b> | I    | <b>1236.637149</b> | 618.822213        | 1219.610600 | 610.308938       | 1218.626584    | 609.816930        | 10 |
| 7  | 798.435594         | 399.721435      | 781.409045  | 391.208161       | 780.425029        | 390.716153        | N    | <b>1123.553085</b> | 562.280181        | 1106.526536 | 553.766906       | 1105.542520    | <b>553.274898</b> | 9  |
| 8  | 899.483273         | 450.245275      | 882.456724  | 441.732000       | 881.472708        | 441.239992        | T    | <b>1009.510158</b> | 505.258717        | 992.483609  | 496.745443       | 991.499593     | 496.253435        | 8  |
| 9  | 1046.551687        | 523.779482      | 1029.525138 | 515.266207       | 1028.541122       | 514.774199        | F    | 908.462479         | 454.734878        | 891.435930  | 446.221603       | 890.451914     | 445.729595        | 7  |
| 10 | 1183.610599        | 592.308938      | 1166.584050 | 583.795663       | 1165.600034       | 583.303655        | H    | 761.394065         | 381.200671        | 744.367516  | 372.687396       | 743.383500     | 372.195388        | 6  |
| 11 | 1311.669177        | 656.338227      | 1294.642628 | 647.824952       | 1293.658612       | 647.332944        | Q    | <b>624.335153</b>  | 312.671215        | 607.308604  | 304.157940       | 606.324588     | 303.665932        | 5  |
| 12 | <b>1474.732506</b> | 737.869891      | 1457.705957 | 729.356617       | 1456.721941       | 728.864609        | Y    | 496.276575         | 248.641926        | 479.250026  | 240.128651       | 478.266010     | 239.636643        | 4  |
| 13 | 1561.764534        | 781.385905      | 1544.737985 | 772.872631       | 1543.753969       | 772.380623        | S    | <b>333.213246</b>  | 167.110261        | 316.186697  | 158.596987       | 315.202681     | 158.104979        | 3  |
| 14 | <b>1660.832948</b> | 830.920112      | 1643.806399 | 822.406838       | 1642.822383       | 821.914830        | V    | 246.181218         | 123.594247        | 229.154669  | 115.080973       |                |                   | 2  |
| 15 |                    |                 |             |                  |                   |                   | K    | 147.112804         | 74.060040         | 130.086255  | 65.546765        |                |                   | 1  |

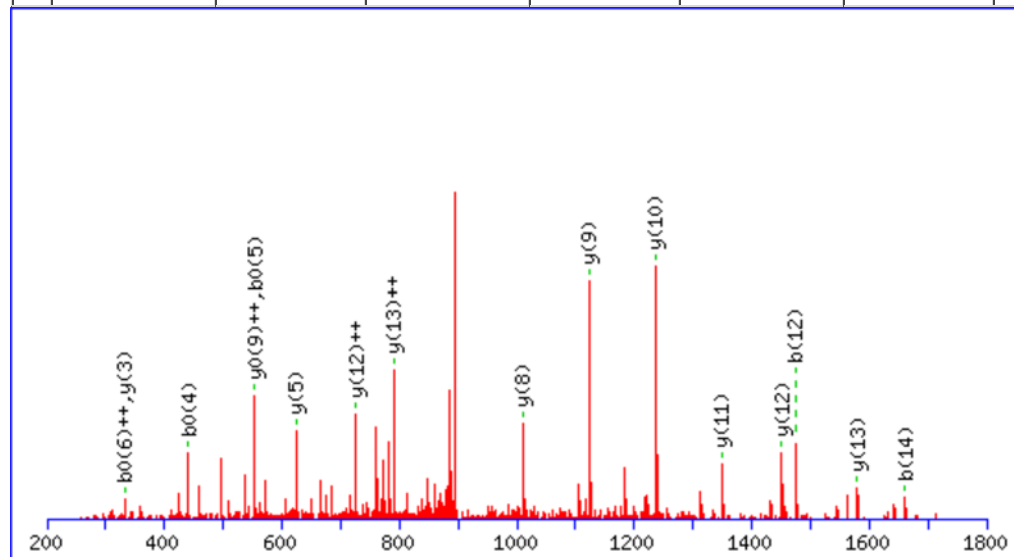

## Peptide View

MS/MS Fragmentation of **IESVLSSSGKR**

Found in **IPI00018236**, Tax\_Id=9606 Gene\_Symbol=GM2A Ganglioside GM2 activator

**Experiment:** 59 - PyE-2 **Fraction:** PyE-2

Match to Query 7018: 1161.635048 from(581.824800,2+)

Title: OECHL100312\_34.5225.5225.2.dta

Data file \\Boromir\masse\Data LTQ-Orbitrap\Chrystelle Lacroix\Etude clinique sJPU\OECHL100312\_34.raw

**Monoisotopic mass of neutral peptide Mr(calc):** 1161.635330 **Fixed modifications:** Carbamidomethyl (C) (apply to specified residues or termini only) **Ions Score:** 77

**Expect:** 1.4e-006 **Matches :** 21/94 fragment ions using 29 most intense peaks ([help](#))

| #  | b                 | b <sup>++</sup>   | b*         | b <sup>*++</sup> | b <sup>0</sup>    | b <sup>0++</sup> | Seq. | y                  | y <sup>++</sup>   | y*          | y <sup>*++</sup>  | y <sup>0</sup>    | y <sup>0++</sup>  | #  |
|----|-------------------|-------------------|------------|------------------|-------------------|------------------|------|--------------------|-------------------|-------------|-------------------|-------------------|-------------------|----|
| 1  | 114.091340        | 57.549308         |            |                  |                   |                  | I    |                    |                   |             |                   |                   |                   | 11 |
| 2  | <b>243.133933</b> | 122.070605        |            |                  | 225.123368        | 113.065322       | E    | <b>1049.558562</b> | <b>525.282919</b> | 1032.532013 | 516.769645        | 1031.547997       | 516.277637        | 10 |
| 3  | <b>330.165961</b> | 165.586618        |            |                  | <b>312.155396</b> | 156.581336       | S    | <b>920.515969</b>  | <b>460.761623</b> | 903.489420  | 452.248348        | 902.505404        | 451.756340        | 9  |
| 4  | 429.234375        | <b>215.120826</b> |            |                  | <b>411.223810</b> | 206.115543       | V    | <b>833.483941</b>  | 417.245609        | 816.457392  | 408.732334        | 815.473376        | 408.240326        | 8  |
| 5  | 542.318439        | 271.662858        |            |                  | 524.307874        | 262.657575       | L    | <b>734.415527</b>  | 367.711402        | 717.388978  | 359.198127        | <b>716.404962</b> | 358.706119        | 7  |
| 6  | 629.350467        | 315.178872        |            |                  | 611.339902        | 306.173589       | S    | <b>621.331463</b>  | 311.169370        | 604.304914  | 302.656095        | 603.320898        | 302.164087        | 6  |
| 7  | <b>716.382495</b> | 358.694886        |            |                  | 698.371930        | 349.689603       | S    | <b>534.299435</b>  | 267.653356        | 517.272886  | 259.140081        | 516.288870        | 258.648073        | 5  |
| 8  | 803.414523        | 402.210899        |            |                  | 785.403958        | 393.205617       | S    | <b>447.267407</b>  | 224.137342        | 430.240858  | <b>215.624067</b> | 429.256842        | <b>215.132059</b> | 4  |
| 9  | 860.435987        | 430.721632        |            |                  | 842.425422        | 421.716349       | G    | <b>360.235379</b>  | 180.621328        | 343.208830  | 172.108053        |                   |                   | 3  |
| 10 | <b>988.530950</b> | 494.769113        | 971.504401 | 486.255838       | 970.520385        | 485.763830       | K    | 303.213915         | 152.110596        | 286.187366  | 143.597321        |                   |                   | 2  |
| 11 |                   |                   |            |                  |                   |                  | R    | <b>175.118952</b>  | 88.063114         | 158.092403  | 79.549840         |                   |                   | 1  |

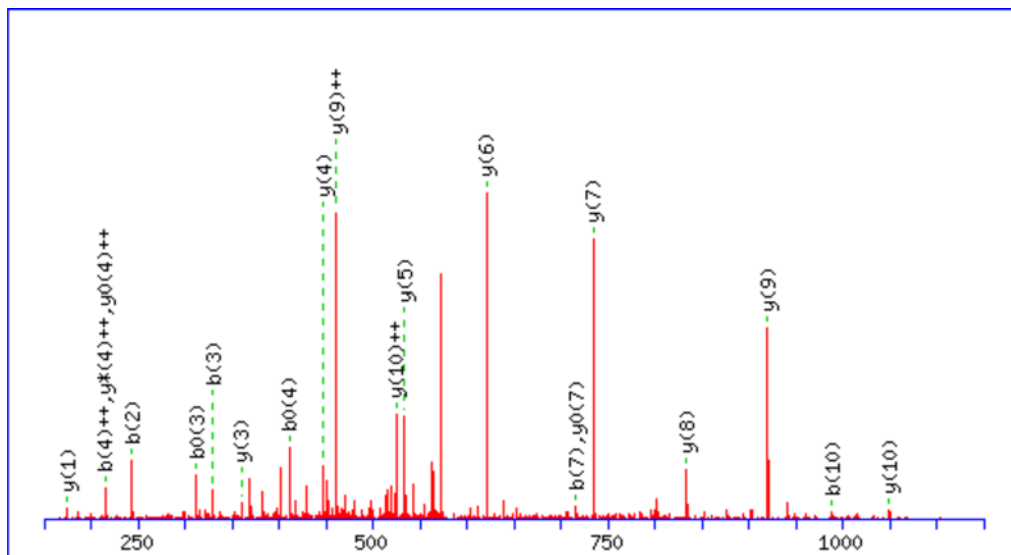

## Peptide View

MS/MS Fragmentation of **VVEQMCITQYER**

Found in **IPI00022284**, Tax\_Id=9606 Gene\_Symbol=PRNP Major prion protein

**Experiment:** 59 - PyE-2 **Fraction:** PyE-2

Match to Query 11841: 1554.718448 from(778.366500,2+)

Title: OECHL100312\_34.13386.13386.2.dta

Data file \\Boromir\masse\Data LTQ-Orbitrap\Chrystelle Lacroix\Etude clinique sJPU\OECHL100312\_34.raw

**Monoisotopic mass of neutral peptide Mr(calc):** 1554.717041 **Fixed modifications:** Carbamidomethyl (C) (apply to specified residues or termini only) **Ions Score:** 68

**Expect:** 1.6e-005 **Matches :** 18/120 fragment ions using 26 most intense peaks ([help](#))

| # | b                 | b <sup>++</sup> | b*         | b* <sup>++</sup> | b <sup>0</sup> | b <sup>0++</sup> | Seq. | y                  | y <sup>++</sup>   | y*          | y* <sup>++</sup> | y <sup>0</sup> | y <sup>0++</sup> | #  |
|---|-------------------|-----------------|------------|------------------|----------------|------------------|------|--------------------|-------------------|-------------|------------------|----------------|------------------|----|
| 1 | 100.075690        | 50.541483       |            |                  |                |                  | V    |                    |                   |             |                  |                |                  | 12 |
| 2 | 199.144104        | 100.075690      |            |                  |                |                  | V    | 1456.655914        | 728.831595        | 1439.629365 | 720.318321       | 1438.645349    | 719.826313       | 11 |
| 3 | <b>328.186697</b> | 164.596987      |            |                  | 310.176132     | 155.591704       | E    | <b>1357.587500</b> | <b>679.297388</b> | 1340.560951 | 670.784114       | 1339.576935    | 670.292106       | 10 |
| 4 | <b>456.245275</b> | 228.626276      | 439.218726 | 220.113001       | 438.234710     | 219.620993       | Q    | <b>1228.544907</b> | 614.776092        | 1211.518358 | 606.262817       | 1210.534342    | 605.770809       | 9  |
| 5 | <b>587.285760</b> | 294.146518      | 570.259211 | 285.633244       | 569.275195     | 285.141236       | M    | <b>1100.486329</b> | 550.746803        | 1083.459780 | 542.233528       | 1082.475764    | 541.741520       | 8  |
| 6 | 747.316409        | 374.161843      | 730.289860 | 365.648568       | 729.305844     | 365.156560       | C    | <b>969.445844</b>  | 485.226560        | 952.419295  | 476.713286       | 951.435279     | 476.221278       | 7  |

|    |                    |            |             |            |             |            |          |                   |            |                   |            |            |            |          |
|----|--------------------|------------|-------------|------------|-------------|------------|----------|-------------------|------------|-------------------|------------|------------|------------|----------|
| 7  | <b>860.400473</b>  | 430.703875 | 843.373924  | 422.190600 | 842.389908  | 421.698592 | <b>I</b> | <b>809.415195</b> | 405.211236 | 792.388646        | 396.697961 | 791.404630 | 396.205953 | <b>6</b> |
| 8  | 961.448152         | 481.227714 | 944.421603  | 472.714440 | 943.437587  | 472.222432 | <b>T</b> | <b>696.331131</b> | 348.669204 | <b>679.304582</b> | 340.155929 | 678.320566 | 339.663921 | <b>5</b> |
| 9  | <b>1089.506730</b> | 545.257003 | 1072.480181 | 536.743729 | 1071.496165 | 536.251721 | <b>Q</b> | <b>595.283452</b> | 298.145364 | 578.256903        | 289.632090 | 577.272887 | 289.140082 | <b>4</b> |
| 10 | <b>1252.570059</b> | 626.788668 | 1235.543510 | 618.275393 | 1234.559494 | 617.783385 | <b>Y</b> | <b>467.224874</b> | 234.116075 | 450.198325        | 225.602801 | 449.214309 | 225.110793 | <b>3</b> |
| 11 | <b>1381.612652</b> | 691.309964 | 1364.586103 | 682.796690 | 1363.602087 | 682.304682 | <b>E</b> | <b>304.161545</b> | 152.584411 | 287.134996        | 144.071136 | 286.150980 | 143.579128 | <b>2</b> |
| 12 |                    |            |             |            |             |            | <b>R</b> | 175.118952        | 88.063114  | 158.092403        | 79.549839  |            |            | <b>1</b> |

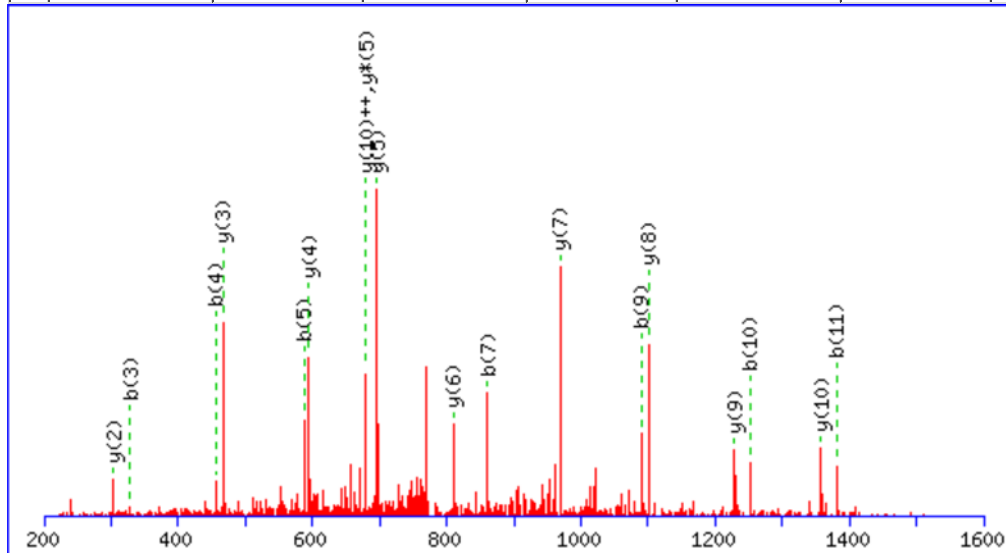

## Peptide View

MS/MS Fragmentation of **LLIYDASNLETGVPSR**

Found in **IP100003111**, Tax\_Id=9606 Gene\_Symbol=LOC652694 Ig kappa chain V-I region AU

Experiment: 59 - PyE-2 Fraction: PyE-2

Match to Query 13793: 1746.916848 from(874.465700,2+)

Title: OECHL100312\_34.17246.17246.2.dta

Data file \\Boromir\masse\Data LTQ-Orbitrap\Chrystelle Lacroix\Etude clinique sJPU\OECHL100312\_34.raw

**Monoisotopic mass of neutral peptide Mr(calc):** 1746.915192 **Fixed modifications:** Carbamidomethyl (C) (apply to specified residues or termini only) **Ions Score:** 66

**Expect:** 2.7e-005 **Matches :** 30/156 fragment ions using 58 most intense peaks ([help](#))

| # | <b>b</b> | <b>b<sup>++</sup></b> | <b>b<sup>*</sup></b> | <b>b<sup>*++</sup></b> | <b>b<sup>0</sup></b> | <b>b<sup>0++</sup></b> | Seq. | <b>y</b> | <b>y<sup>++</sup></b> | <b>y<sup>*</sup></b> | <b>y<sup>*++</sup></b> | <b>y<sup>0</sup></b> | <b>y<sup>0++</sup></b> | # |
|---|----------|-----------------------|----------------------|------------------------|----------------------|------------------------|------|----------|-----------------------|----------------------|------------------------|----------------------|------------------------|---|
|---|----------|-----------------------|----------------------|------------------------|----------------------|------------------------|------|----------|-----------------------|----------------------|------------------------|----------------------|------------------------|---|

|    |                    |                   |                    |            |             |            |  |   |                    |                   |                    |            |                    |                   |  |  |  |    |
|----|--------------------|-------------------|--------------------|------------|-------------|------------|--|---|--------------------|-------------------|--------------------|------------|--------------------|-------------------|--|--|--|----|
| 1  | 114.091340         | 57.549308         |                    |            |             |            |  | L |                    |                   |                    |            |                    |                   |  |  |  | 16 |
| 2  | 227.175404         | 114.091340        |                    |            |             |            |  | L | 1634.838427        | 817.922852        | 1617.811878        | 809.409577 | 1616.827862        | 808.917569        |  |  |  | 15 |
| 3  | 340.259468         | 170.633372        |                    |            |             |            |  | I | <b>1521.754363</b> | <b>761.380820</b> | 1504.727814        | 752.867545 | 1503.743798        | 752.375537        |  |  |  | 14 |
| 4  | 503.322797         | 252.165036        |                    |            |             |            |  | Y | 1408.670299        | <b>704.838788</b> | <b>1391.643750</b> | 696.325513 | <b>1390.659734</b> | 695.833505        |  |  |  | 13 |
| 5  | <b>618.349740</b>  | 309.678508        |                    |            | 600.339175  | 300.673226 |  | D | <b>1245.606970</b> | 623.307123        | 1228.580421        | 614.793849 | 1227.596405        | 614.301841        |  |  |  | 12 |
| 6  | 689.386854         | 345.197065        |                    |            | 671.376289  | 336.191782 |  | A | <b>1130.580027</b> | 565.793652        | 1113.553478        | 557.280377 | 1112.569462        | 556.788369        |  |  |  | 11 |
| 7  | 776.418882         | 388.713079        |                    |            | 758.408317  | 379.707796 |  | S | <b>1059.542913</b> | 530.275095        | 1042.516364        | 521.761820 | 1041.532348        | 521.269812        |  |  |  | 10 |
| 8  | 890.461809         | 445.734542        | 873.435260         | 437.221268 | 872.451244  | 436.729260 |  | N | <b>972.510885</b>  | 486.759081        | 955.484336         | 478.245806 | 954.500320         | 477.753798        |  |  |  | 9  |
| 9  | <b>1003.545873</b> | 502.276574        | <b>986.519324</b>  | 493.763300 | 985.535308  | 493.271292 |  | L | <b>858.467958</b>  | <b>429.737617</b> | 841.441409         | 421.224343 | 840.457393         | 420.732335        |  |  |  | 8  |
| 10 | <b>1132.588466</b> | 566.797871        | 1115.561917        | 558.284597 | 1114.577901 | 557.792588 |  | E | <b>745.383894</b>  | 373.195585        | 728.357345         | 364.682311 | 727.373329         | 364.190303        |  |  |  | 7  |
| 11 | <b>1233.636145</b> | <b>617.321710</b> | 1216.609596        | 608.808436 | 1215.625580 | 608.316428 |  | T | <b>616.341301</b>  | 308.674289        | 599.314752         | 300.161014 | 598.330736         | <b>299.669006</b> |  |  |  | 6  |
| 12 | <b>1290.657609</b> | 645.832442        | 1273.631060        | 637.319168 | 1272.647044 | 636.827160 |  | G | <b>515.293622</b>  | 258.150449        | 498.267073         | 249.637175 | 497.283057         | 249.145167        |  |  |  | 5  |
| 13 | <b>1389.726023</b> | 695.366649        | <b>1372.699474</b> | 686.853375 | 1371.715458 | 686.361367 |  | V | <b>458.272158</b>  | 229.639717        | 441.245609         | 221.126443 | 440.261593         | 220.634435        |  |  |  | 4  |
| 14 | <b>1486.778787</b> | 743.893032        | 1469.752238        | 735.379757 | 1468.768222 | 734.887749 |  | P | <b>359.203744</b>  | 180.105510        | <b>342.177195</b>  | 171.592236 | <b>341.193179</b>  | 171.100228        |  |  |  | 3  |
| 15 | <b>1573.810815</b> | 787.409046        | 1556.784266        | 778.895771 | 1555.800250 | 778.403763 |  | S | 262.150980         | 131.579128        | 245.124431         | 123.065854 | 244.140415         | 122.573846        |  |  |  | 2  |
| 16 |                    |                   |                    |            |             |            |  | R | 175.118952         | 88.063114         | 158.092403         | 79.549839  |                    |                   |  |  |  | 1  |

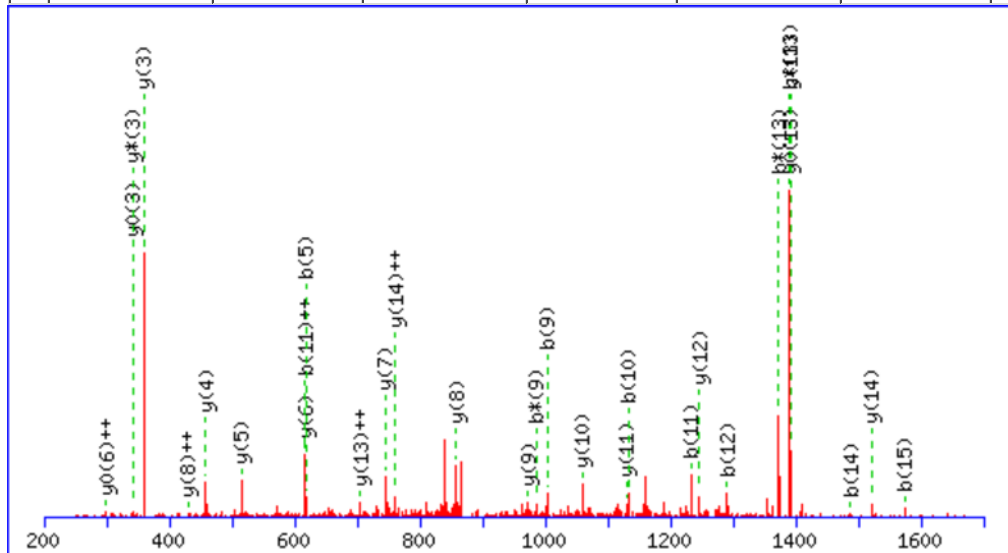



## Peptide View

MS/MS Fragmentation of **ASGVNRFSGSGTDFTLK**

Found in **IPI00387110**, Tax\_Id=9606 Gene\_Symbol=- Ig kappa chain V-II region MIL

**Experiment:** 59 - PyE-2 **Fraction:** PyE-2

Match to Query 15263: 1984.950448 from(993.482500,2+)

Title: OECHL100312\_34.13780.13780.2.dta

Data file \\Boromir\masse\Data LTQ-Orbitrap\Chrystelle Lacroix\Etude clinique sJPU\OECHL100312\_34.raw

**Monoisotopic mass of neutral peptide Mr(calc):** 1984.949051 **Fixed modifications:** Carbamidomethyl (C) (apply to specified residues or termini only) **Variable**

**modifications:** N6 : Deamidated (NQ) **Ions Score:** 51 **Expect:** 0.0013 **Matches :** 60/212 fragment ions using 145 most intense peaks ([help](#))

| #  | b           | b <sup>++</sup> | b*          | b <sup>*++</sup> | b <sup>0</sup> | b <sup>0++</sup> | Seq. | y           | y <sup>++</sup> | y*          | y <sup>*++</sup> | y <sup>0</sup> | y <sup>0++</sup> | #  |
|----|-------------|-----------------|-------------|------------------|----------------|------------------|------|-------------|-----------------|-------------|------------------|----------------|------------------|----|
| 1  | 72.044390   | 36.525833       |             |                  |                |                  | A    |             |                 |             |                  |                |                  | 20 |
| 2  | 159.076418  | 80.041847       |             |                  | 141.065853     | 71.036564        | S    | 1914.919197 | 957.963236      | 1897.892648 | 949.449962       | 1896.908632    | 948.957954       | 19 |
| 3  | 216.097882  | 108.552579      |             |                  | 198.087317     | 99.547296        | G    | 1827.887169 | 914.447222      | 1810.860620 | 905.933948       | 1809.876604    | 905.441940       | 18 |
| 4  | 315.166296  | 158.086786      |             |                  | 297.155731     | 149.081504       | V    | 1770.865705 | 885.936490      | 1753.839156 | 877.423216       | 1752.855140    | 876.931208       | 17 |
| 5  | 412.219060  | 206.613168      |             |                  | 394.208495     | 197.607885       | P    | 1671.797291 | 836.402283      | 1654.770742 | 827.889009       | 1653.786726    | 827.397001       | 16 |
| 6  | 527.246003  | 264.126640      | 510.219454  | 255.613365       | 509.235438     | 255.121357       | N    | 1574.744527 | 787.875902      | 1557.717978 | 779.362627       | 1556.733962    | 778.870619       | 15 |
| 7  | 683.347114  | 342.177195      | 666.320565  | 333.663920       | 665.336549     | 333.171912       | R    | 1459.717584 | 730.362430      | 1442.691035 | 721.849156       | 1441.707019    | 721.357148       | 14 |
| 8  | 830.415528  | 415.711402      | 813.388979  | 407.198127       | 812.404963     | 406.706119       | F    | 1303.616473 | 652.311875      | 1286.589924 | 643.798600       | 1285.605908    | 643.306592       | 13 |
| 9  | 917.447556  | 459.227416      | 900.421007  | 450.714141       | 899.436991     | 450.222133       | S    | 1156.548059 | 578.777668      | 1139.521510 | 570.264393       | 1138.537494    | 569.772385       | 12 |
| 10 | 974.469020  | 487.738148      | 957.442471  | 479.224873       | 956.458455     | 478.732865       | G    | 1069.516031 | 535.261654      | 1052.489482 | 526.748379       | 1051.505466    | 526.256371       | 11 |
| 11 | 1061.501048 | 531.254162      | 1044.474499 | 522.740887       | 1043.490483    | 522.248879       | S    | 1012.494567 | 506.750922      | 995.468018  | 498.237647       | 994.484002     | 497.745639       | 10 |
| 12 | 1118.522512 | 559.764894      | 1101.495963 | 551.251619       | 1100.511947    | 550.759611       | G    | 925.462539  | 463.234908      | 908.435990  | 454.721633       | 907.451974     | 454.229625       | 9  |
| 13 | 1205.554540 | 603.280908      | 1188.527991 | 594.767633       | 1187.543975    | 594.275625       | S    | 868.441075  | 434.724176      | 851.414526  | 426.210901       | 850.430510     | 425.718893       | 8  |
| 14 | 1262.576004 | 631.791640      | 1245.549455 | 623.278365       | 1244.565439    | 622.786357       | G    | 781.409047  | 391.208162      | 764.382498  | 382.694887       | 763.398482     | 382.202879       | 7  |
| 15 | 1363.623683 | 682.315479      | 1346.597134 | 673.802205       | 1345.613118    | 673.310197       | T    | 724.387583  | 362.697430      | 707.361034  | 354.184155       | 706.377018     | 353.692147       | 6  |
| 16 | 1478.650626 | 739.828951      | 1461.624077 | 731.315677       | 1460.640061    | 730.823668       | D    | 623.339904  | 312.173590      | 606.313355  | 303.660316       | 605.329339     | 303.168308       | 5  |
| 17 | 1625.719040 | 813.363158      | 1608.692491 | 804.849884       | 1607.708475    | 804.357875       | F    | 508.312961  | 254.660118      | 491.286412  | 246.146844       | 490.302396     | 245.654836       | 4  |
| 18 | 1726.766719 | 863.886998      | 1709.740170 | 855.373723       | 1708.756154    | 854.881715       | T    | 361.244547  | 181.125911      | 344.217998  | 172.612637       | 343.233982     | 172.120629       | 3  |
| 19 | 1839.850783 | 920.429029      | 1822.824234 | 911.915755       | 1821.840218    | 911.423747       | L    | 260.196868  | 130.602072      | 243.170319  | 122.088797       |                |                  | 2  |
| 20 |             |                 |             |                  |                |                  | K    | 147.112804  | 74.060040       | 130.086255  | 65.546765        |                |                  | 1  |

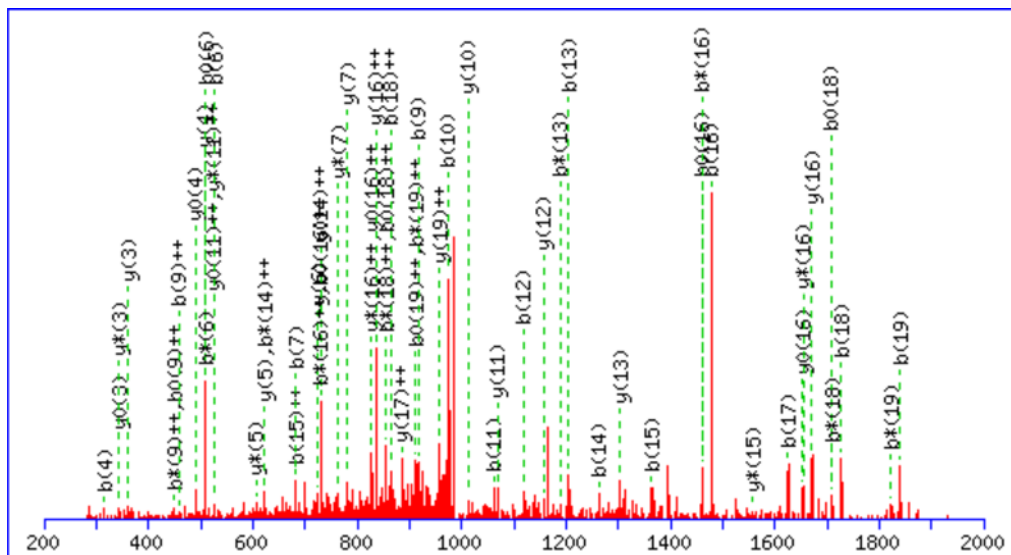

## Peptide View

MS/MS Fragmentation of **QSGQLDIDECR**

Found in **IPI00294615**, Tax\_Id=9606 Gene\_Symbol=FBLN5 Fibulin-5

**Experiment:** 59 - PyE-2 **Fraction:** PyE-2

Match to Query 10825: 1479.610248 from(740.812400,2+)

Title: OECHL100312\_34.8594.8594.2.dta

Data file \\Boromir\masse\Data LTQ-Orbitrap\Chrystelle Lacroix\Etude clinique sJPU\OECHL100312\_34.raw

**Monoisotopic mass of neutral peptide Mr(calc):** 1479.608231 **Fixed modifications:** Carbamidomethyl (C) (apply to specified residues or termini only) **Ions Score:** 52

**Expect:** 0.00015 **Matches :** 15/126 fragment ions using 26 most intense peaks ([help](#))

| # | b                 | b <sup>++</sup> | b*                | b* <sup>++</sup> | b <sup>0</sup> | b <sup>0++</sup> | Seq.     | y                  | y <sup>++</sup> | y*                 | y* <sup>++</sup> | y <sup>0</sup> | y <sup>0++</sup> | #         |
|---|-------------------|-----------------|-------------------|------------------|----------------|------------------|----------|--------------------|-----------------|--------------------|------------------|----------------|------------------|-----------|
| 1 | 129.065854        | 65.036565       | 112.039305        | 56.523291        |                |                  | <b>Q</b> |                    |                 |                    |                  |                |                  | <b>12</b> |
| 2 | 216.097882        | 108.552579      | 199.071333        | 100.039305       | 198.087317     | 99.547296        | <b>S</b> | 1352.556927        | 676.782102      | <b>1335.530378</b> | 668.268827       | 1334.546362    | 667.776819       | <b>11</b> |
| 3 | <b>273.119346</b> | 137.063311      | 256.092797        | 128.550037       | 255.108781     | 128.058029       | <b>G</b> | <b>1265.524899</b> | 633.266088      | 1248.498350        | 624.752813       | 1247.514334    | 624.260805       | <b>10</b> |
| 4 | 401.177924        | 201.092600      | <b>384.151375</b> | 192.579326       | 383.167359     | 192.087318       | <b>Q</b> | 1208.503435        | 604.755356      | 1191.476886        | 596.242081       | 1190.492870    | 595.750073       | <b>9</b>  |
| 5 | 561.208573        | 281.107925      | <b>544.182024</b> | 272.594650       | 543.198008     | 272.102642       | <b>C</b> | <b>1080.444857</b> | 540.726067      | 1063.418308        | 532.212792       | 1062.434292    | 531.720784       | <b>8</b>  |
| 6 | 674.292637        | 337.649957      | 657.266088        | 329.136682       | 656.282072     | 328.644674       | <b>L</b> | <b>920.414208</b>  | 460.710742      | 903.387659         | 452.197468       | 902.403643     | 451.705460       | <b>7</b>  |

|    |             |            |             |            |             |            |   |            |            |            |            |            |            |   |
|----|-------------|------------|-------------|------------|-------------|------------|---|------------|------------|------------|------------|------------|------------|---|
| 7  | 789.319580  | 395.163428 | 772.293031  | 386.650154 | 771.309015  | 386.158146 | D | 807.330144 | 404.168710 | 790.303595 | 395.655436 | 789.319579 | 395.163428 | 6 |
| 8  | 902.403644  | 451.705460 | 885.377095  | 443.192186 | 884.393079  | 442.700178 | I | 692.303201 | 346.655239 | 675.276652 | 338.141964 | 674.292636 | 337.649956 | 5 |
| 9  | 1017.430587 | 509.218932 | 1000.404038 | 500.705657 | 999.420022  | 500.213649 | D | 579.219137 | 290.113207 | 562.192588 | 281.599932 | 561.208572 | 281.107924 | 4 |
| 10 | 1146.473180 | 573.740228 | 1129.446631 | 565.226954 | 1128.462615 | 564.734946 | E | 464.192194 | 232.599735 | 447.165645 | 224.086461 | 446.181629 | 223.594453 | 3 |
| 11 | 1306.503829 | 653.755553 | 1289.477280 | 645.242278 | 1288.493264 | 644.750270 | C | 335.149601 | 168.078438 | 318.123052 | 159.565164 |            |            | 2 |
| 12 |             |            |             |            |             |            | R | 175.118952 | 88.063114  | 158.092403 | 79.549839  |            |            | 1 |

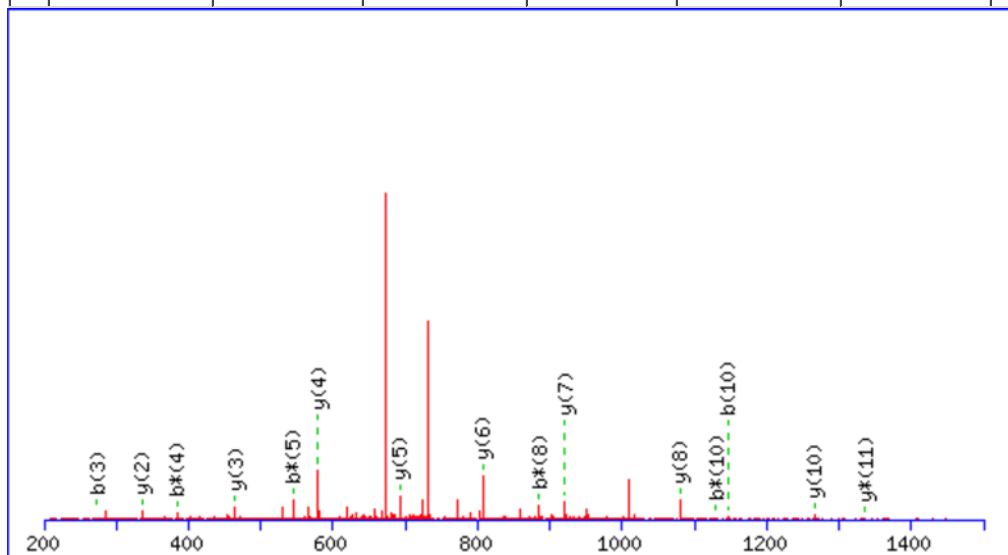

## Peptide View

MS/MS Fragmentation of **ASQILNAYLVR**

Found in **IP100289920**, Tax\_Id=9606 Gene\_Symbol=UPK3A Isoform 1 of Uroplakin-3a

Experiment: 59 - PyE-2 Fraction: PyE-2

Match to Query 8387: 1246.702848 from(624.358700,2+)

Title: OECHL100312\_34.16112.16112.2.dta

Data file \\Boromir\masse\Data LTQ-Orbitrap\Chrystelle Lacroix\Etude clinique sJPU\OECHL100312\_34.raw

**Monoisotopic mass of neutral peptide Mr(calc):** 1246.703339 **Fixed modifications:** Carbamidomethyl (C) (apply to specified residues or termini only) **Ions Score:** 49

**Expect:** 0.00049 **Matches :** 8/96 fragment ions using 11 most intense peaks ([help](#))

| # | b | b <sup>++</sup> | b <sup>*</sup> | b <sup>*++</sup> | b <sup>0</sup> | b <sup>0++</sup> | Seq. | y | y <sup>++</sup> | y <sup>*</sup> | y <sup>*++</sup> | y <sup>0</sup> | y <sup>0++</sup> | # |
|---|---|-----------------|----------------|------------------|----------------|------------------|------|---|-----------------|----------------|------------------|----------------|------------------|---|
|---|---|-----------------|----------------|------------------|----------------|------------------|------|---|-----------------|----------------|------------------|----------------|------------------|---|

|    |                    |            |             |            |             |            |   |                   |            |             |            |             |            |    |
|----|--------------------|------------|-------------|------------|-------------|------------|---|-------------------|------------|-------------|------------|-------------|------------|----|
| 1  | 72.044390          | 36.525833  |             |            |             |            | A |                   |            |             |            |             |            | 11 |
| 2  | 159.076418         | 80.041847  |             |            | 141.065853  | 71.036564  | S | 1176.673534       | 588.840405 | 1159.646985 | 580.327131 | 1158.662969 | 579.835123 | 10 |
| 3  | <b>287.134996</b>  | 144.071136 | 270.108447  | 135.557862 | 269.124431  | 135.065854 | Q | 1089.641506       | 545.324391 | 1072.614957 | 536.811117 |             |            | 9  |
| 4  | 400.219060         | 200.613168 | 383.192511  | 192.099894 | 382.208495  | 191.607886 | I | <b>961.582928</b> | 481.295102 | 944.556379  | 472.781828 |             |            | 8  |
| 5  | 513.303124         | 257.155200 | 496.276575  | 248.641926 | 495.292559  | 248.149918 | L | <b>848.498864</b> | 424.753070 | 831.472315  | 416.239795 |             |            | 7  |
| 6  | 627.346051         | 314.176664 | 610.319502  | 305.663389 | 609.335486  | 305.171381 | N | <b>735.414800</b> | 368.211038 | 718.388251  | 359.697764 |             |            | 6  |
| 7  | 698.383165         | 349.695221 | 681.356616  | 341.181946 | 680.372600  | 340.689938 | A | 621.371873        | 311.189575 | 604.345324  | 302.676300 |             |            | 5  |
| 8  | 861.446494         | 431.226885 | 844.419945  | 422.713611 | 843.435929  | 422.221603 | Y | <b>550.334759</b> | 275.671018 | 533.308210  | 267.157743 |             |            | 4  |
| 9  | 974.530558         | 487.768917 | 957.504009  | 479.255643 | 956.519993  | 478.763635 | L | <b>387.271430</b> | 194.139353 | 370.244881  | 185.626078 |             |            | 3  |
| 10 | <b>1073.598972</b> | 537.303124 | 1056.572423 | 528.789850 | 1055.588407 | 528.297842 | V | <b>274.187366</b> | 137.597321 | 257.160817  | 129.084046 |             |            | 2  |
| 11 |                    |            |             |            |             |            | R | 175.118952        | 88.063114  | 158.092403  | 79.549839  |             |            | 1  |

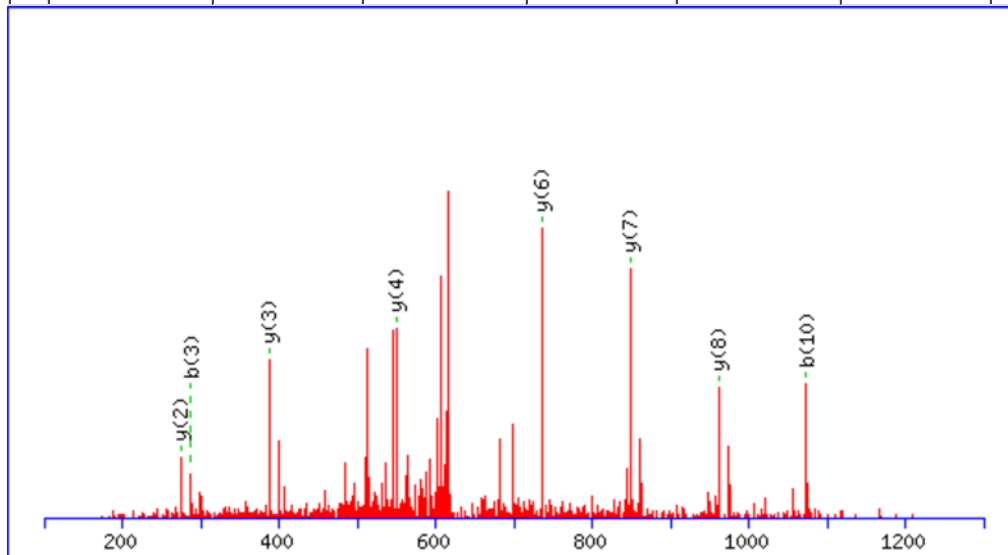

## Peptide View

MS/MS Fragmentation of **LSSGLVTAALYGR**

Found in **IPI00218413**, Tax\_Id=9606 Gene\_Symbol=BTD Biotinidase

Experiment: 23 - NOPC2 Fraction: NOPC2

Match to Query 7853: 1306.724848 from(654.369700,2+)

Title: OECHL100312\_32.17307.17307.2.dta

Data file \\Boromir\masse\Data LTQ-Orbitrap\Chrystelle Lacroix\Etude clinique sJPU\OECHL100312\_32.raw

**Monoisotopic mass of neutral peptide Mr(calc):** 1306.724487**Fixed modifications:** Carbamidomethyl (C) (apply to specified residues or termini only)**Ions Score:** 72**Expect:** 2.2e-006**Matches :** 19/106 fragment ions using 34 most intense peaks ([help](#))

| #  | b                  | b <sup>++</sup> | b <sup>0</sup>    | b <sup>0++</sup>  | Seq. | y                  | y <sup>++</sup> | y*                | y <sup>*++</sup> | y <sup>0</sup> | y <sup>0++</sup> | #  |
|----|--------------------|-----------------|-------------------|-------------------|------|--------------------|-----------------|-------------------|------------------|----------------|------------------|----|
| 1  | 114.091340         | 57.549308       |                   |                   | L    |                    |                 |                   |                  |                |                  | 13 |
| 2  | 201.123368         | 101.065322      | 183.112803        | 92.060039         | S    | <b>1194.647714</b> | 597.827495      | 1177.621165       | 589.314221       | 1176.637149    | 588.822212       | 12 |
| 3  | 288.155396         | 144.581336      | <b>270.144831</b> | 135.576053        | S    | <b>1107.615686</b> | 554.311481      | 1090.589137       | 545.798206       | 1089.605121    | 545.306198       | 11 |
| 4  | 345.176860         | 173.092068      | <b>327.166295</b> | 164.086785        | G    | <b>1020.583658</b> | 510.795467      | 1003.557109       | 502.282192       | 1002.573093    | 501.790184       | 10 |
| 5  | <b>458.260924</b>  | 229.634100      | 440.250359        | 220.628817        | L    | <b>963.562194</b>  | 482.284735      | 946.535645        | 473.771460       | 945.551629     | 473.279452       | 9  |
| 6  | 557.329338         | 279.168307      | 539.318773        | <b>270.163025</b> | V    | <b>850.478130</b>  | 425.742703      | 833.451581        | 417.229428       | 832.467565     | 416.737420       | 8  |
| 7  | 658.377017         | 329.692147      | 640.366452        | 320.686864        | T    | <b>751.409716</b>  | 376.208496      | 734.383167        | 367.695221       | 733.399151     | 367.203213       | 7  |
| 8  | 729.414131         | 365.210704      | 711.403566        | 356.205421        | A    | 650.362037         | 325.684656      | 633.335488        | 317.171382       |                |                  | 6  |
| 9  | 800.451245         | 400.729261      | 782.440680        | 391.723978        | A    | <b>579.324923</b>  | 290.166099      | 562.298374        | 281.652825       |                |                  | 5  |
| 10 | <b>913.535309</b>  | 457.271293      | <b>895.524744</b> | 448.266010        | L    | <b>508.287809</b>  | 254.647542      | 491.261260        | 246.134268       |                |                  | 4  |
| 11 | <b>1076.598638</b> | 538.802957      | 1058.588073       | 529.797674        | Y    | <b>395.203745</b>  | 198.105510      | 378.177196        | 189.592236       |                |                  | 3  |
| 12 | <b>1133.620102</b> | 567.313689      | 1115.609537       | 558.308406        | G    | <b>232.140416</b>  | 116.573846      | <b>215.113867</b> | 108.060571       |                |                  | 2  |
| 13 |                    |                 |                   |                   | R    | 175.118952         | 88.063114       | 158.092403        | 79.549839        |                |                  | 1  |

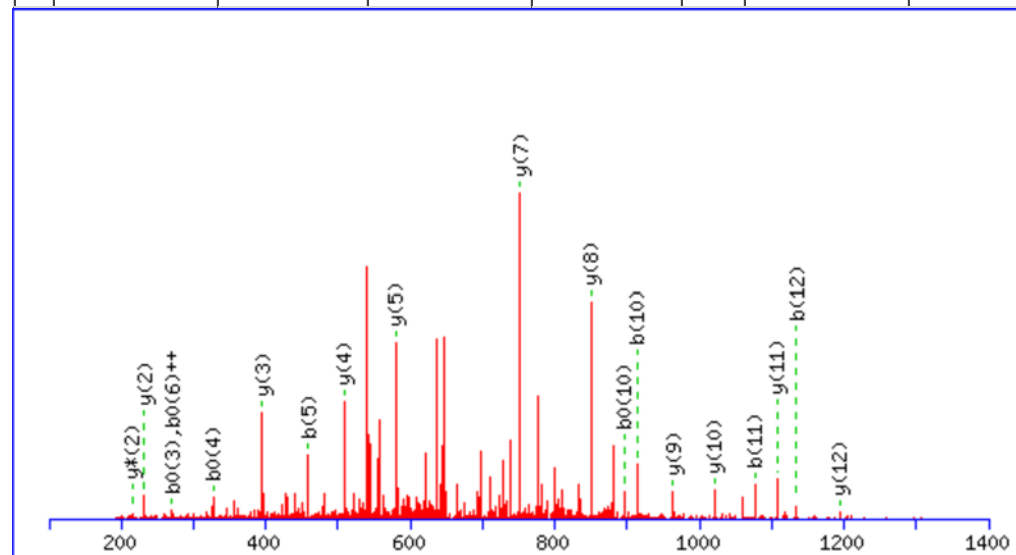

## Peptide View

MS/MS Fragmentation of **VTATGFQQCSLIDGR**

Found in **IP100333140**, Tax\_Id=9606 Gene\_Symbol=DNER Delta and Notch-like epidermal growth factor-related receptor

**Experiment:** 23 - NOPC2 **Fraction:** NOPC2

Match to Query 11071: 1651.800048 from(826.907300,2+)

Title: OECHL100312\_32.14068.14068.2.dta

Data file \\Boromir\masse\Data LTQ-Orbitrap\Chrystelle Lacroix\Etude clinique sJPU\OECHL100312\_32.raw

**Monoisotopic mass of neutral peptide Mr(calc):** 1651.798828 **Fixed modifications:** Carbamidomethyl (C) (apply to specified residues or termini only) **Ions Score:** 79

**Expect:** 1.5e-006 **Matches :** 23/150 fragment ions using 42 most intense peaks ([help](#))

| #         | <b>b</b>           | <b>b<sup>++</sup></b> | <b>b<sup>*</sup></b> | <b>b<sup>*++</sup></b> | <b>b<sup>0</sup></b> | <b>b<sup>0++</sup></b> | Seq.     | <b>y</b>           | <b>y<sup>++</sup></b> | <b>y<sup>*</sup></b> | <b>y<sup>*++</sup></b> | <b>y<sup>0</sup></b> | <b>y<sup>0++</sup></b> | #         |
|-----------|--------------------|-----------------------|----------------------|------------------------|----------------------|------------------------|----------|--------------------|-----------------------|----------------------|------------------------|----------------------|------------------------|-----------|
| <b>1</b>  | 100.075690         | 50.541483             |                      |                        |                      |                        | <b>V</b> |                    |                       |                      |                        |                      |                        | <b>15</b> |
| <b>2</b>  | 201.123369         | 101.065322            |                      |                        | 183.112804           | 92.060040              | <b>T</b> | 1553.737670        | 777.372473            | 1536.711121          | 768.859198             | 1535.727105          | 768.367190             | <b>14</b> |
| <b>3</b>  | <b>272.160483</b>  | 136.583879            |                      |                        | 254.149918           | 127.578597             | <b>A</b> | <b>1452.689991</b> | <b>726.848633</b>     | 1435.663442          | 718.335359             | 1434.679426          | 717.843351             | <b>13</b> |
| <b>4</b>  | 373.208162         | 187.107719            |                      |                        | <b>355.197597</b>    | 178.102437             | <b>T</b> | <b>1381.652877</b> | <b>691.330076</b>     | 1364.626328          | 682.816802             | 1363.642312          | 682.324794             | <b>12</b> |
| <b>5</b>  | 430.229626         | 215.618451            |                      |                        | 412.219061           | 206.613169             | <b>G</b> | <b>1280.605198</b> | 640.806237            | 1263.578649          | 632.292962             | 1262.594633          | 631.800954             | <b>11</b> |
| <b>6</b>  | 577.298040         | 289.152658            |                      |                        | <b>559.287475</b>    | 280.147376             | <b>F</b> | <b>1223.583734</b> | 612.295505            | 1206.557185          | 603.782230             | 1205.573169          | 603.290222             | <b>10</b> |
| <b>7</b>  | 705.356618         | 353.181947            | 688.330069           | 344.668673             | 687.346053           | 344.176665             | <b>Q</b> | <b>1076.515320</b> | 538.761298            | <b>1059.488771</b>   | 530.248023             | 1058.504755          | 529.756015             | <b>9</b>  |
| <b>8</b>  | 833.415196         | 417.211236            | 816.388647           | 408.697962             | 815.404631           | 408.205954             | <b>Q</b> | <b>948.456742</b>  | 474.732009            | 931.430193           | 466.218734             | 930.446177           | 465.726726             | <b>8</b>  |
| <b>9</b>  | 993.445845         | 497.226561            | 976.419296           | 488.713286             | 975.435280           | 488.221278             | <b>C</b> | 820.398164         | 410.702720            | 803.371615           | 402.189445             | 802.387599           | 401.697437             | <b>7</b>  |
| <b>10</b> | 1080.477873        | 540.742575            | 1063.451324          | 532.229300             | 1062.467308          | 531.737292             | <b>S</b> | <b>660.367515</b>  | 330.687395            | 643.340966           | 322.174121             | 642.356950           | 321.682113             | <b>6</b>  |
| <b>11</b> | <b>1193.561937</b> | 597.284607            | 1176.535388          | 588.771332             | <b>1175.551372</b>   | 588.279324             | <b>L</b> | <b>573.335487</b>  | 287.171381            | 556.308938           | 278.658107             | <b>555.324922</b>    | 278.166099             | <b>5</b>  |
| <b>12</b> | <b>1306.646001</b> | 653.826638            | 1289.619452          | 645.313364             | 1288.635436          | 644.821356             | <b>I</b> | <b>460.251423</b>  | 230.629349            | 443.224874           | 222.116075             | <b>442.240858</b>    | 221.624067             | <b>4</b>  |
| <b>13</b> | <b>1421.672944</b> | 711.340110            | 1404.646395          | 702.826836             | 1403.662379          | 702.334827             | <b>D</b> | <b>347.167359</b>  | 174.087317            | 330.140810           | 165.574043             | 329.156794           | 165.082035             | <b>3</b>  |
| <b>14</b> | 1478.694408        | 739.850842            | 1461.667859          | 731.337567             | 1460.683843          | 730.845559             | <b>G</b> | <b>232.140416</b>  | 116.573846            | 215.113867           | 108.060571             |                      |                        | <b>2</b>  |
| <b>15</b> |                    |                       |                      |                        |                      |                        | <b>R</b> | 175.118952         | 88.063114             | 158.092403           | 79.549839              |                      |                        | <b>1</b>  |

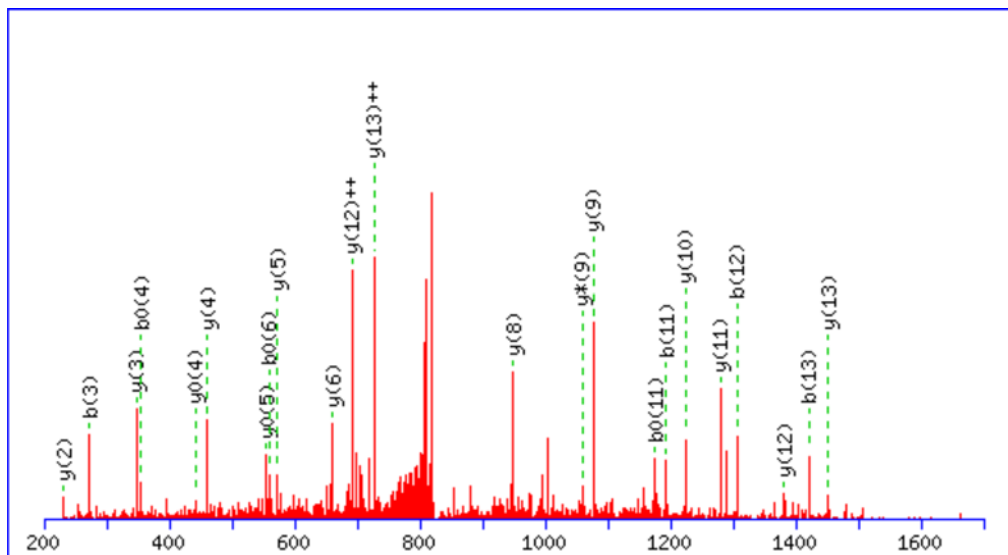

## Peptide View

MS/MS Fragmentation of **GSSWSADLDKCMDACSR**

Found in **IP100010277**, Tax\_Id=9606 Gene\_Symbol=TNFRSF12A Isoform 1 of Tumor necrosis factor receptor superfamily member 12A

**Experiment:** 23 - NOPC2 **Fraction:** NOPC2

Match to Query 14721: 2104.807448 from(1053.411000,2+)

Title: OECHL100312\_32.14613.14613.2.dta

Data file \\Boromir\masse\Data LTQ-Orbitrap\Chrystelle Lacroix\Etude clinique sJPU\OECHL100312\_32.raw

**Monoisotopic mass of neutral peptide Mr(calc):** 2104.807083 **Fixed modifications:** Carbamidomethyl (C) (apply to specified residues or termini only) **Ions Score:** 71

**Expect:** 4.2e-007 **Matches :** 20/180 fragment ions using 34 most intense peaks ([help](#))

| # | b          | b <sup>++</sup> | b <sup>*</sup> | b <sup>*++</sup> | b <sup>0</sup> | b <sup>0++</sup> | Seq.     | y                  | y <sup>++</sup>   | y <sup>*</sup> | y <sup>*++</sup> | y <sup>0</sup> | y <sup>0++</sup> |
|---|------------|-----------------|----------------|------------------|----------------|------------------|----------|--------------------|-------------------|----------------|------------------|----------------|------------------|
| 1 | 58.028740  | 29.518008       |                |                  |                |                  | <b>G</b> |                    |                   |                |                  |                |                  |
| 2 | 145.060768 | 73.034022       |                |                  | 127.050203     | 64.028740        | <b>S</b> | 2048.792893        | 1024.900085       | 2031.766344    | 1016.386810      | 2030.782328    | 1015.894802      |
| 3 | 232.092796 | 116.550036      |                |                  | 214.082231     | 107.544753       | <b>S</b> | 1961.760865        | <b>981.384071</b> | 1944.734316    | 972.870796       | 1943.750300    | 972.378788       |
| 4 | 418.172109 | 209.589693      |                |                  | 400.161544     | 200.584410       | <b>W</b> | 1874.728837        | 937.868057        | 1857.702288    | 929.354782       | 1856.718272    | 928.862774       |
| 5 | 505.204137 | 253.105707      |                |                  | 487.193572     | 244.100424       | <b>S</b> | <b>1688.649524</b> | <b>844.828400</b> | 1671.622975    | 836.315126       | 1670.638959    | 835.823118       |
| 6 | 576.241251 | 288.624264      |                |                  | 558.230686     | 279.618981       | <b>A</b> | <b>1601.617496</b> | 801.312386        | 1584.590947    | 792.799112       | 1583.606931    | 792.307104       |

|    |                    |            |             |            |                   |            |   |                    |            |                   |                   |             |                   |
|----|--------------------|------------|-------------|------------|-------------------|------------|---|--------------------|------------|-------------------|-------------------|-------------|-------------------|
| 7  | 691.268194         | 346.137735 |             |            | 673.257629        | 337.132453 | D | <b>1530.580382</b> | 765.793829 | 1513.553833       | 757.280555        | 1512.569817 | 756.788547        |
| 8  | 804.352258         | 402.679767 |             |            | <b>786.341693</b> | 393.674485 | L | <b>1415.553439</b> | 708.280358 | 1398.526890       | 699.767083        | 1397.542874 | 699.275075        |
| 9  | 919.379201         | 460.193239 |             |            | 901.368636        | 451.187956 | D | <b>1302.469375</b> | 651.738326 | 1285.442826       | 643.225051        | 1284.458810 | 642.733043        |
| 10 | 1047.474164        | 524.240720 | 1030.447615 | 515.727446 | 1029.463599       | 515.235437 | K | <b>1187.442432</b> | 594.224854 | 1170.415883       | 585.711580        | 1169.431867 | 585.219572        |
| 11 | <b>1207.504813</b> | 604.256045 | 1190.478264 | 595.742770 | 1189.494248       | 595.250762 | C | 1059.347469        | 530.177373 | 1042.320920       | 521.664098        | 1041.336904 | 521.172090        |
| 12 | 1338.545298        | 669.776287 | 1321.518749 | 661.263013 | 1320.534733       | 660.771005 | M | <b>899.316820</b>  | 450.162048 | 882.290271        | 441.648774        | 881.306255  | 441.156766        |
| 13 | <b>1453.572241</b> | 727.289759 | 1436.545692 | 718.776484 | 1435.561676       | 718.284476 | D | <b>768.276335</b>  | 384.641806 | 751.249786        | 376.128531        | 750.265770  | 375.636523        |
| 14 | 1613.602890        | 807.305083 | 1596.576341 | 798.791809 | 1595.592325       | 798.299801 | C | <b>653.249392</b>  | 327.128334 | 636.222843        | <b>318.615060</b> | 635.238827  | <b>318.123052</b> |
| 15 | 1684.640004        | 842.823640 | 1667.613455 | 834.310366 | 1666.629439       | 833.818358 | A | <b>493.218743</b>  | 247.113010 | 476.192194        | 238.599735        | 475.208178  | 238.107727        |
| 16 | <b>1771.672032</b> | 886.339654 | 1754.645483 | 877.826380 | 1753.661467       | 877.334372 | S | <b>422.181629</b>  | 211.594453 | 405.155080        | 203.081178        | 404.171064  | 202.589170        |
| 17 | 1931.702681        | 966.354979 | 1914.676132 | 957.841704 | 1913.692116       | 957.349696 | C | 335.149601         | 168.078439 | <b>318.123052</b> | 159.565164        |             |                   |
| 18 |                    |            |             |            |                   |            | R | 175.118952         | 88.063114  | 158.092403        | 79.549840         |             |                   |

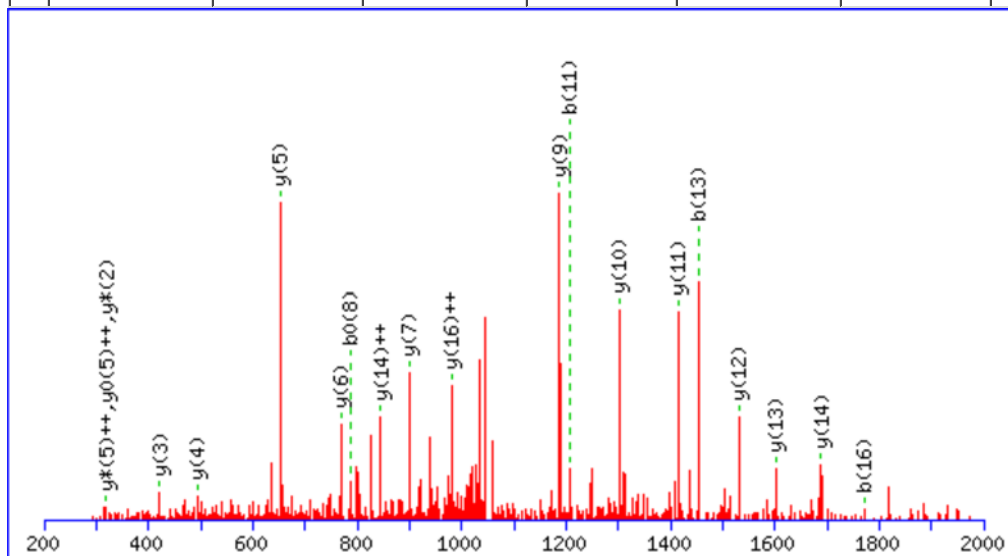

## Peptide View

MS/MS Fragmentation of **SYELTQPPSVSVSPGQ**TAR

Found in **IPI00382440**, Tax\_Id=9606 Gene\_Symbol=- Ig lambda chain V-IV region Hil

Experiment: 23 - NOPC2 Fraction: NOPC2



Match to Query 14039: 2002.995448 from(1002.505000,2+)

Title: OECHL100312\_32.13438.13438.2.dta

Data file \\Boromir\masse\Data LTQ-Orbitrap\Chrystelle Lacroix\Etude clinique sJPU\OECHL100312\_32.raw

**Monoisotopic mass of neutral peptide Mr(calc):** 2002.995987**Fixed modifications:** Carbamidomethyl (C) (apply to specified residues or termini only)**Ions Score:** 61**Expect:** 0.00013**Matches :** 38/202 fragment ions using 64 most intense peaks ([help](#))

| #  | b                  | b <sup>++</sup> | b*                 | b <sup>+++</sup>  | b <sup>0</sup>     | b <sup>0++</sup>  | Seq. | y                  | y <sup>++</sup>   | y*                 | y <sup>+++</sup> | y <sup>0</sup> | y <sup>0++</sup> | #  |
|----|--------------------|-----------------|--------------------|-------------------|--------------------|-------------------|------|--------------------|-------------------|--------------------|------------------|----------------|------------------|----|
| 1  | 88.039304          | 44.523290       |                    |                   | 70.028739          | 35.518008         | S    |                    |                   |                    |                  |                |                  | 19 |
| 2  | 251.102633         | 126.054954      |                    |                   | 233.092068         | 117.049672        | Y    | 1916.971234        | 958.989255        | 1899.944685        | 950.475981       | 1898.960669    | 949.983973       | 18 |
| 3  | <b>380.145226</b>  | 190.576251      |                    |                   | <b>362.134661</b>  | 181.570969        | E    | 1753.907905        | 877.457591        | 1736.881356        | 868.944316       | 1735.897340    | 868.452308       | 17 |
| 4  | <b>493.229290</b>  | 247.118283      |                    |                   | <b>475.218725</b>  | 238.113001        | L    | 1624.865312        | <b>812.936294</b> | 1607.838763        | 804.423020       | 1606.854747    | 803.931012       | 16 |
| 5  | <b>594.276969</b>  | 297.642123      |                    |                   | <b>576.266404</b>  | 288.636840        | T    | <b>1511.781248</b> | 756.394262        | 1494.754699        | 747.880988       | 1493.770683    | 747.388980       | 15 |
| 6  | <b>722.335547</b>  | 361.671412      | <b>705.308998</b>  | 353.158137        | <b>704.324982</b>  | 352.666129        | Q    | <b>1410.733569</b> | <b>705.870423</b> | <b>1393.707020</b> | 697.357148       | 1392.723004    | 696.865140       | 14 |
| 7  | 819.388311         | 410.197794      | 802.361762         | 401.684519        | 801.377746         | 401.192511        | P    | <b>1282.674991</b> | <b>641.841134</b> | 1265.648442        | 633.327859       | 1264.664426    | 632.835851       | 13 |
| 8  | 916.441075         | 458.724176      | 899.414526         | 450.210901        | 898.430510         | 449.718893        | P    | <b>1185.622227</b> | 593.314752        | 1168.595678        | 584.801477       | 1167.611662    | 584.309469       | 12 |
| 9  | 1003.473103        | 502.240190      | 986.446554         | <b>493.726915</b> | <b>985.462538</b>  | <b>493.234907</b> | S    | <b>1088.569463</b> | 544.788370        | 1071.542914        | 536.275095       | 1070.558898    | 535.783087       | 11 |
| 10 | <b>1102.541517</b> | 551.774397      | <b>1085.514968</b> | 543.261122        | <b>1084.530952</b> | 542.769114        | V    | 1001.537435        | 501.272356        | 984.510886         | 492.759081       | 983.526870     | 492.267073       | 10 |
| 11 | 1189.573545        | 595.290411      | 1172.546996        | 586.777136        | 1171.562980        | 586.285128        | S    | <b>902.469021</b>  | 451.738149        | 885.442472         | 443.224874       | 884.458456     | 442.732866       | 9  |
| 12 | 1288.641959        | 644.824618      | 1271.615410        | 636.311343        | <b>1270.631394</b> | 635.819335        | V    | <b>815.436993</b>  | 408.222135        | 798.410444         | 399.708860       | 797.426428     | 399.216852       | 8  |
| 13 | <b>1375.673987</b> | 688.340632      | 1358.647438        | 679.827357        | <b>1357.663422</b> | 679.335349        | S    | <b>716.368579</b>  | 358.687928        | 699.342030         | 350.174653       | 698.358014     | 349.682645       | 7  |
| 14 | 1472.726751        | 736.867014      | 1455.700202        | 728.353739        | 1454.716186        | 727.861731        | P    | <b>629.336551</b>  | 315.171914        | 612.310002         | 306.658639       | 611.325986     | 306.166631       | 6  |
| 15 | 1529.748215        | 765.377746      | <b>1512.721666</b> | 756.864471        | <b>1511.737650</b> | 756.372463        | G    | 532.283787         | 266.645532        | 515.257238         | 258.132257       | 514.273222     | 257.640249       | 5  |
| 16 | <b>1657.806793</b> | 829.407035      | 1640.780244        | 820.893760        | <b>1639.796228</b> | 820.401752        | Q    | <b>475.262323</b>  | 238.134800        | 458.235774         | 229.621525       | 457.251758     | 229.129517       | 4  |
| 17 | <b>1758.854472</b> | 879.930874      | 1741.827923        | 871.417600        | 1740.843907        | 870.925592        | T    | 347.203745         | 174.105510        | 330.177196         | 165.592236       | 329.193180     | 165.100228       | 3  |
| 18 | <b>1829.891586</b> | 915.449431      | 1812.865037        | 906.936157        | 1811.881021        | 906.444149        | A    | 246.156066         | 123.581671        | 229.129517         | 115.068396       |                |                  | 2  |
| 19 |                    |                 |                    |                   |                    |                   | R    | 175.118952         | 88.063114         | 158.092403         | 79.549839        |                |                  | 1  |

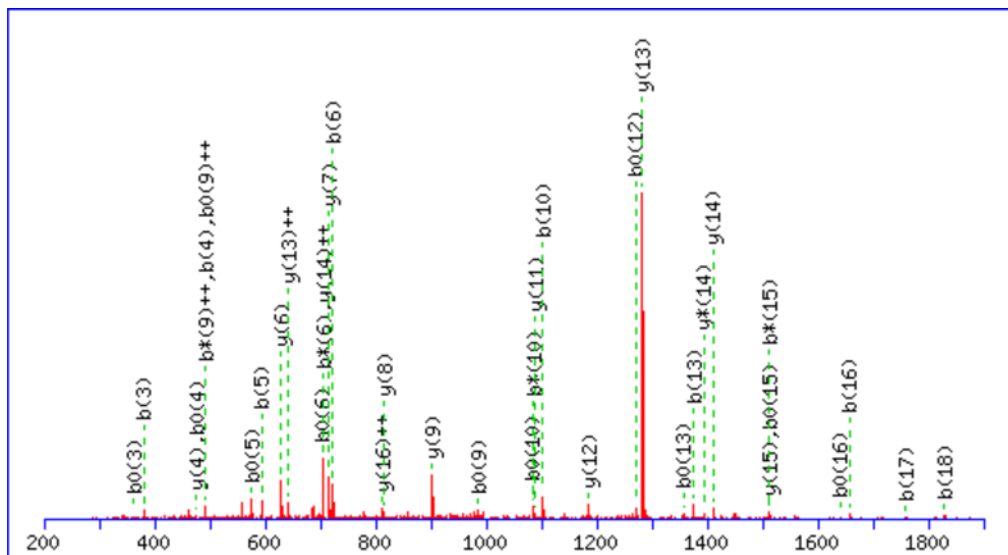

## Peptide View

MS/MS Fragmentation of **HSFKGEECPAGSHR**

Found in **IP100021970**, Tax\_Id=9606 Gene\_Symbol=MGC31957;TNFRSF10C TNFRSF10C protein

**Experiment:** 23 - NOPC2 **Fraction:** NOPC2

Match to Query 10452: 1597.705872 from(533.575900,3+)

Title: OECHL100312\_32.2471.2471.3.dta

Data file \\Boromir\masse\Data LTQ-Orbitrap\Chrystelle Lacroix\Etude clinique sJPU\OECHL100312\_32.raw

**Monoisotopic mass of neutral peptide Mr(calc):** 1597.705566**Fixed modifications:** Carbamidomethyl (C) (apply to specified residues or termini only)**Ions Score:** 64

**Expect:** 2.2e-005**Matches :** 22/144 fragment ions using 24 most intense peaks ([help](#))

| # | b                 | b <sup>++</sup>   | b <sup>*</sup> | b <sup>*++</sup> | b <sup>0</sup> | b <sup>0++</sup> | Seq.     | y                  | y <sup>++</sup>   | y <sup>*</sup> | y <sup>*++</sup> | y <sup>0</sup> | y <sup>0++</sup> | #         |
|---|-------------------|-------------------|----------------|------------------|----------------|------------------|----------|--------------------|-------------------|----------------|------------------|----------------|------------------|-----------|
| 1 | 138.066188        | 69.536732         |                |                  |                |                  | <b>H</b> |                    |                   |                |                  |                |                  | <b>14</b> |
| 2 | <b>225.098216</b> | 113.052746        |                |                  | 207.087651     | 104.047463       | <b>S</b> | 1461.653938        | <b>731.330607</b> | 1444.627389    | 722.817333       | 1443.643373    | 722.325325       | <b>13</b> |
| 3 | 372.166630        | 186.586953        |                |                  | 354.156065     | 177.581671       | <b>F</b> | 1374.621910        | <b>687.814593</b> | 1357.595361    | 679.301319       | 1356.611345    | 678.809311       | <b>12</b> |
| 4 | 500.261593        | 250.634435        | 483.235044     | 242.121160       | 482.251028     | 241.629152       | <b>K</b> | <b>1227.553496</b> | 614.280386        | 1210.526947    | 605.767112       | 1209.542931    | 605.275104       | <b>11</b> |
| 5 | 557.283057        | 279.145167        | 540.256508     | 270.631892       | 539.272492     | 270.139884       | <b>G</b> | <b>1099.458533</b> | 550.232905        | 1082.431984    | 541.719630       | 1081.447968    | 541.227622       | <b>10</b> |
| 6 | 686.325650        | <b>343.666463</b> | 669.299101     | 335.153189       | 668.315085     | 334.661181       | <b>E</b> | 1042.437069        | 521.722173        | 1025.410520    | 513.208898       | 1024.426504    | 512.716890       | <b>9</b>  |

|    |             |            |             |            |             |            |   |            |            |            |            |            |            |   |
|----|-------------|------------|-------------|------------|-------------|------------|---|------------|------------|------------|------------|------------|------------|---|
| 7  | 815.368243  | 408.187760 | 798.341694  | 399.674485 | 797.357678  | 399.182477 | E | 913.394476 | 457.200876 | 896.367927 | 448.687602 | 895.383911 | 448.195594 | 8 |
| 8  | 975.398892  | 488.203084 | 958.372343  | 479.689810 | 957.388327  | 479.197802 | C | 784.351883 | 392.679580 | 767.325334 | 384.166305 | 766.341318 | 383.674297 | 7 |
| 9  | 1072.451656 | 536.729466 | 1055.425107 | 528.216192 | 1054.441091 | 527.724184 | P | 624.321234 | 312.664255 | 607.294685 | 304.150981 | 606.310669 | 303.658973 | 6 |
| 10 | 1143.488770 | 572.248023 | 1126.462221 | 563.734749 | 1125.478205 | 563.242741 | A | 527.268470 | 264.137873 | 510.241921 | 255.624598 | 509.257905 | 255.132590 | 5 |
| 11 | 1200.510234 | 600.758755 | 1183.483685 | 592.245481 | 1182.499669 | 591.753473 | G | 456.231356 | 228.619316 | 439.204807 | 220.106041 | 438.220791 | 219.614033 | 4 |
| 12 | 1287.542262 | 644.274769 | 1270.515713 | 635.761495 | 1269.531697 | 635.269487 | S | 399.209892 | 200.108584 | 382.183343 | 191.595309 | 381.199327 | 191.103301 | 3 |
| 13 | 1424.601174 | 712.804225 | 1407.574625 | 704.290951 | 1406.590609 | 703.798943 | H | 312.177864 | 156.592570 | 295.151315 | 148.079295 |            |            | 2 |
| 14 |             |            |             |            |             |            | R | 175.118952 | 88.063114  | 158.092403 | 79.549839  |            |            | 1 |

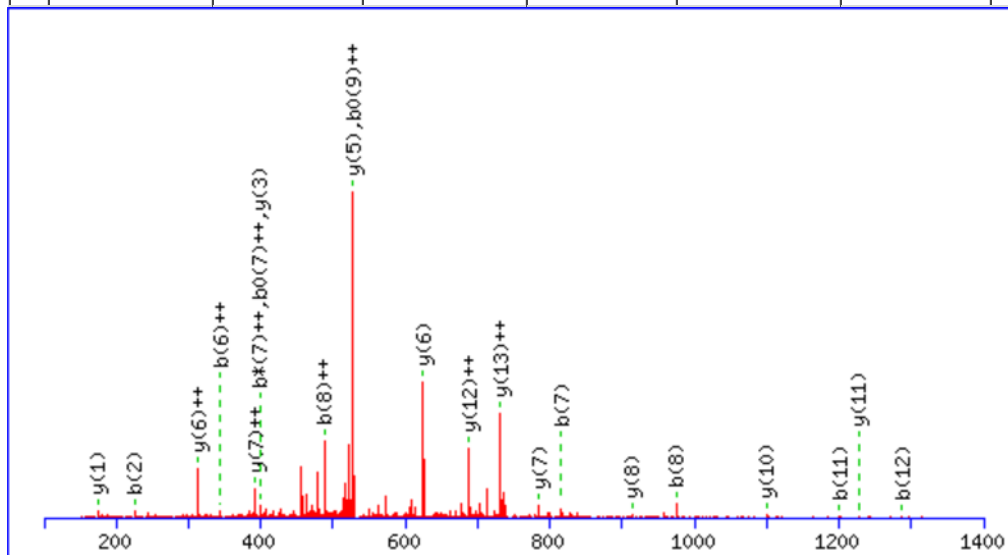

## Peptide View

MS/MS Fragmentation of **GTLLAFEAR**

Found in **IP100029817**, Tax\_Id=9606 Gene\_Symbol=NEU1 Sialidase-1

**Experiment:** 23 - NOPC2 **Fraction:** NOPC2

Match to Query 4163: 1047.571048 from(524.792800,2+)

Title: OECHL100312\_32.17074.17074.2.dta

Data file \\Boromir\masse\Data LTQ-Orbitrap\Chrystelle Lacroix\Etude clinique sJPU\OECHL100312\_32.raw

**Monoisotopic mass of neutral peptide Mr(calc):** 1047.571274 **Fixed modifications:** Carbamidomethyl (C) (apply to specified residues or termini only) **Ions Score:** 57

**Expect:** 0.00016**Matches :** 18/84 fragment ions using 27 most intense peaks ([help](#))

| #  | b                 | b <sup>++</sup> | b <sup>0</sup>    | b <sup>0++</sup> | Seq.     | y                 | y <sup>++</sup>   | y*         | y* <sup>++</sup>  | y <sup>0</sup> | y <sup>0++</sup>  | #         |
|----|-------------------|-----------------|-------------------|------------------|----------|-------------------|-------------------|------------|-------------------|----------------|-------------------|-----------|
| 1  | 58.028740         | 29.518008       |                   |                  | <b>G</b> |                   |                   |            |                   |                |                   | <b>10</b> |
| 2  | 159.076419        | 80.041847       | 141.065854        | 71.036565        | <b>T</b> | 991.557108        | 496.282192        | 974.530559 | 487.768918        | 973.546543     | 487.276910        | <b>9</b>  |
| 3  | <b>272.160483</b> | 136.583879      | <b>254.149918</b> | 127.578597       | <b>L</b> | <b>890.509429</b> | <b>445.758353</b> | 873.482880 | 437.245078        | 872.498864     | 436.753070        | <b>8</b>  |
| 4  | <b>385.244547</b> | 193.125912      | 367.233982        | 184.120629       | <b>L</b> | <b>777.425365</b> | 389.216321        | 760.398816 | 380.703046        | 759.414800     | 380.211038        | <b>7</b>  |
| 5  | <b>456.281661</b> | 228.644469      | 438.271096        | 219.639186       | <b>A</b> | <b>664.341301</b> | 332.674289        | 647.314752 | 324.161014        | 646.330736     | 323.669006        | <b>6</b>  |
| 6  | <b>603.350075</b> | 302.178676      | 585.339510        | 293.173393       | <b>F</b> | <b>593.304187</b> | 297.155732        | 576.277638 | <b>288.642457</b> | 575.293622     | <b>288.150449</b> | <b>5</b>  |
| 7  | <b>674.387189</b> | 337.697233      | 656.376624        | 328.691950       | <b>A</b> | <b>446.235773</b> | 223.621524        | 429.209224 | 215.108250        | 428.225208     | 214.616242        | <b>4</b>  |
| 8  | <b>803.429782</b> | 402.218529      | 785.419217        | 393.213247       | <b>E</b> | 375.198659        | 188.102968        | 358.172110 | 179.589693        | 357.188094     | 179.097685        | <b>3</b>  |
| 9  | <b>874.466896</b> | 437.737086      | 856.456331        | 428.731804       | <b>A</b> | <b>246.156066</b> | 123.581671        | 229.129517 | 115.068397        |                |                   | <b>2</b>  |
| 10 |                   |                 |                   |                  | <b>R</b> | <b>175.118952</b> | 88.063114         | 158.092403 | 79.549840         |                |                   | <b>1</b>  |

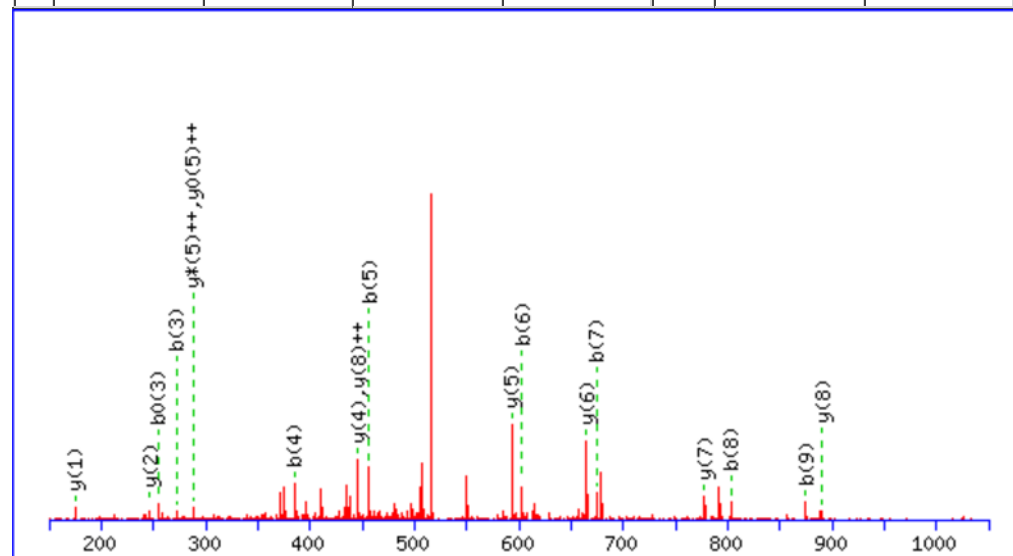

## Peptide View

MS/MS Fragmentation of **LEGEACGVYTPR**

Found in **IPI00297284**, Tax\_Id=9606 Gene\_Symbol=IGFBP2 Insulin-like growth factor-binding protein 2

**Experiment:** 23 - NOPC2 **Fraction:** NOPC2

Match to Query 8237: 1350.627048 from(676.320800,2+)

Title: OECHL100312\_32.8612.8612.2.dta

Data file \\Boromir\masse\Data LTQ-Orbitrap\Chrystelle Lacroix\Etude clinique sJPU\OECHL100312\_32.raw

**Monoisotopic mass of neutral peptide Mr(calc):** 1350.623795**Fixed modifications:** Carbamidomethyl (C) (apply to specified residues or termini only)**Ions Score:** 61**Expect:** 9e-005**Matches :** 10/104 fragment ions using 12 most intense peaks ([help](#))

| #  | b           | b <sup>++</sup> | b <sup>0</sup> | b <sup>0++</sup> | Seq. | y           | y <sup>++</sup> | y*          | y* <sup>++</sup> | y <sup>0</sup> | y <sup>0++</sup> | #  |
|----|-------------|-----------------|----------------|------------------|------|-------------|-----------------|-------------|------------------|----------------|------------------|----|
| 1  | 114.091340  | 57.549308       |                |                  | L    |             |                 |             |                  |                |                  | 12 |
| 2  | 243.133933  | 122.070605      | 225.123368     | 113.065322       | E    | 1238.547015 | 619.777146      | 1221.520466 | 611.263871       | 1220.536450    | 610.771863       | 11 |
| 3  | 300.155397  | 150.581336      | 282.144832     | 141.576054       | G    | 1109.504422 | 555.255849      | 1092.477873 | 546.742575       | 1091.493857    | 546.250567       | 10 |
| 4  | 429.197990  | 215.102633      | 411.187425     | 206.097351       | E    | 1052.482958 | 526.745117      | 1035.456409 | 518.231843       | 1034.472393    | 517.739835       | 9  |
| 5  | 500.235104  | 250.621190      | 482.224539     | 241.615908       | A    | 923.440365  | 462.223821      | 906.413816  | 453.710546       | 905.429800     | 453.218538       | 8  |
| 6  | 660.265753  | 330.636515      | 642.255188     | 321.631232       | C    | 852.403251  | 426.705264      | 835.376702  | 418.191989       | 834.392686     | 417.699981       | 7  |
| 7  | 717.287217  | 359.147247      | 699.276652     | 350.141964       | G    | 692.372602  | 346.689939      | 675.346053  | 338.176665       | 674.362037     | 337.684657       | 6  |
| 8  | 816.355631  | 408.681454      | 798.345066     | 399.676171       | V    | 635.351138  | 318.179207      | 618.324589  | 309.665933       | 617.340573     | 309.173925       | 5  |
| 9  | 979.418960  | 490.213118      | 961.408395     | 481.207836       | Y    | 536.282724  | 268.645000      | 519.256175  | 260.131726       | 518.272159     | 259.639718       | 4  |
| 10 | 1080.466639 | 540.736958      | 1062.456074    | 531.731675       | T    | 373.219395  | 187.113335      | 356.192846  | 178.600061       | 355.208830     | 178.108053       | 3  |
| 11 | 1177.519403 | 589.263340      | 1159.508838    | 580.258057       | P    | 272.171716  | 136.589496      | 255.145167  | 128.076221       |                |                  | 2  |
| 12 |             |                 |                |                  | R    | 175.118952  | 88.063114       | 158.092403  | 79.549839        |                |                  | 1  |

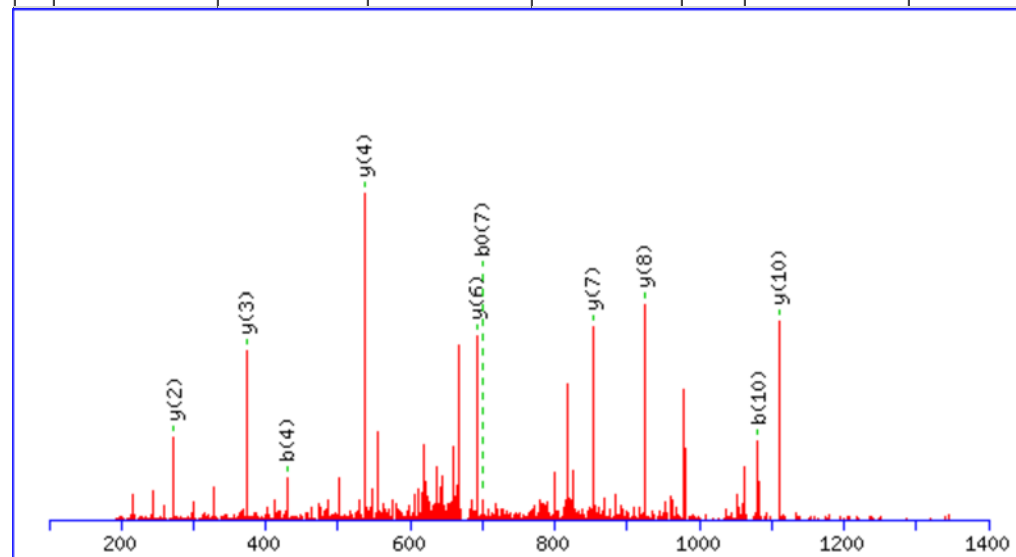

## Peptide View

MS/MS Fragmentation of **NIETINTFHQYSVK**

Found in **IPI00027462**, Tax\_Id=9606 Gene\_Symbol=S100A9 Protein S100-A9

**Experiment:** 23 - NOPC2 **Fraction:** NOPC2

Match to Query 12703: 1805.933248 from(903.973900,2+)

Title: OECHL100312\_32.20085.20085.2.dta

Data file \\Boromir\masse\Data LTQ-Orbitrap\Chrystelle Lacroix\Etude clinique sJPU\OECHL100312\_32.raw

**Monoisotopic mass of neutral peptide Mr(calc):** 1805.931183 **Fixed modifications:** Carbamidomethyl (C) (apply to specified residues or termini only) **Ions Score:** 57

**Expect:** 0.00027 **Matches :** 36/160 fragment ions using 48 most intense peaks ([help](#))

| #  | b                  | b <sup>++</sup>   | b*                 | b <sup>*++</sup> | b <sup>0</sup>     | b <sup>0++</sup>  | Seq. | y                  | y <sup>++</sup>   | y*                 | y <sup>*++</sup>  | y <sup>0</sup>     | y <sup>0++</sup>  | #  |
|----|--------------------|-------------------|--------------------|------------------|--------------------|-------------------|------|--------------------|-------------------|--------------------|-------------------|--------------------|-------------------|----|
| 1  | 115.050203         | 58.028740         | 98.023654          | 49.515465        |                    |                   | N    |                    |                   |                    |                   |                    |                   | 15 |
| 2  | 228.134267         | 114.570771        | 211.107718         | 106.057497       |                    |                   | I    | 1692.895549        | 846.951413        | 1675.869000        | 838.438138        | 1674.884984        | 837.946130        | 14 |
| 3  | <b>357.176860</b>  | 179.092068        | 340.150311         | 170.578793       | <b>339.166295</b>  | 170.086785        | E    | <b>1579.811485</b> | <b>790.409381</b> | 1562.784936        | <b>781.896106</b> | <b>1561.800920</b> | <b>781.404098</b> | 13 |
| 4  | <b>458.224539</b>  | 229.615907        | <b>441.197990</b>  | 221.102633       | <b>440.213974</b>  | 220.610625        | T    | <b>1450.768892</b> | <b>725.888084</b> | <b>1433.742343</b> | 717.374810        | 1432.758327        | 716.882802        | 12 |
| 5  | 571.308603         | 286.157940        | 554.282054         | 277.644665       | <b>553.298038</b>  | 277.152657        | I    | <b>1349.721213</b> | 675.364245        | 1332.694664        | <b>666.850970</b> | 1331.710648        | <b>666.358962</b> | 11 |
| 6  | 684.392667         | 342.699972        | 667.366118         | 334.186697       | <b>666.382102</b>  | <b>333.694689</b> | I    | <b>1236.637149</b> | 618.822213        | 1219.610600        | 610.308938        | 1218.626584        | 609.816930        | 10 |
| 7  | 798.435594         | 399.721435        | <b>781.409045</b>  | 391.208161       | 780.425029         | 390.716153        | N    | <b>1123.553085</b> | 562.280181        | 1106.526536        | 553.766906        | 1105.542520        | <b>553.274898</b> | 9  |
| 8  | 899.483273         | 450.245275        | 882.456724         | 441.732000       | 881.472708         | <b>441.239992</b> | T    | <b>1009.510158</b> | 505.258717        | 992.483609         | 496.745443        | 991.499593         | <b>496.253435</b> | 8  |
| 9  | 1046.551687        | 523.779482        | 1029.525138        | 515.266207       | 1028.541122        | 514.774199        | F    | 908.462479         | 454.734878        | 891.435930         | 446.221603        | 890.451914         | 445.729595        | 7  |
| 10 | 1183.610599        | 592.308938        | 1166.584050        | 583.795663       | 1165.600034        | 583.303655        | H    | <b>761.394065</b>  | 381.200671        | 744.367516         | 372.687396        | 743.383500         | 372.195388        | 6  |
| 11 | 1311.669177        | 656.338227        | 1294.642628        | 647.824952       | 1293.658612        | 647.332944        | Q    | <b>624.335153</b>  | 312.671215        | 607.308604         | 304.157940        | 606.324588         | 303.665932        | 5  |
| 12 | <b>1474.732506</b> | 737.869891        | 1457.705957        | 729.356617       | 1456.721941        | 728.864609        | Y    | <b>496.276575</b>  | 248.641926        | 479.250026         | 240.128651        | 478.266010         | 239.636643        | 4  |
| 13 | <b>1561.764534</b> | <b>781.385905</b> | 1544.737985        | 772.872631       | <b>1543.753969</b> | 772.380623        | S    | <b>333.213246</b>  | 167.110261        | 316.186697         | 158.596987        | 315.202681         | 158.104979        | 3  |
| 14 | <b>1660.832948</b> | 830.920112        | <b>1643.806399</b> | 822.406838       | 1642.822383        | 821.914830        | V    | 246.181218         | 123.594247        | 229.154669         | 115.080973        |                    |                   | 2  |
| 15 |                    |                   |                    |                  |                    |                   | K    | 147.112804         | 74.060040         | 130.086255         | 65.546765         |                    |                   | 1  |

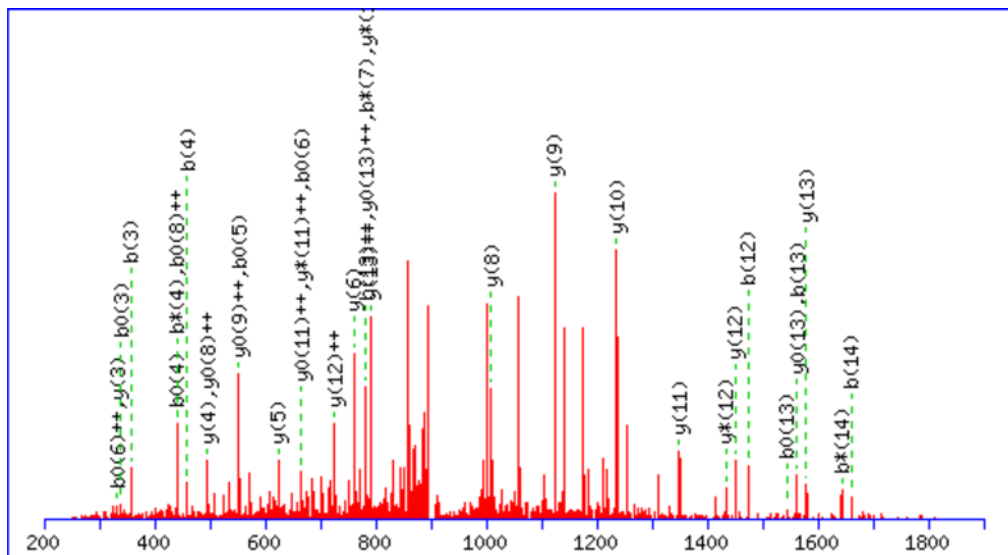

## Peptide View

MS/MS Fragmentation of **WLKGGVVLKEDALPGQK**

Found in **IPI00019906**, Tax\_Id=9606 Gene\_Symbol=BSG Isoform 2 of Basigin

**Experiment:** 23 - NOPC2 **Fraction:** NOPC2

Match to Query 12919: 1837.047448 from(919.531000,2+)

Title: OECHL100312\_32.13954.13954.2.dta

Data file \\Boromir\masse\Data LTQ-Orbitrap\Chrystelle Lacroix\Etude clinique sJPU\OECHL100312\_32.raw

**Monoisotopic mass of neutral peptide Mr(calc):** 1837.046158 **Fixed modifications:** Carbamidomethyl (C) (apply to specified residues or termini only) **Ions Score:** 83

**Expect:** 1.2e-007 **Matches :** 23/158 fragment ions using 30 most intense peaks ([help](#))

| # | b                 | b <sup>++</sup> | b <sup>*</sup> | b <sup>*++</sup> | b <sup>0</sup> | b <sup>0++</sup> | Seq. | y                  | y <sup>++</sup>   | y <sup>*</sup> | y <sup>*++</sup> | y <sup>0</sup> | y <sup>0++</sup> | #  |
|---|-------------------|-----------------|----------------|------------------|----------------|------------------|------|--------------------|-------------------|----------------|------------------|----------------|------------------|----|
| 1 | 187.086589        | 94.046932       |                |                  |                |                  | W    |                    |                   |                |                  |                |                  | 17 |
| 2 | 300.170653        | 150.588965      |                |                  |                |                  | L    | 1651.974134        | 826.490705        | 1634.947585    | 817.977431       | 1633.963569    | 817.485423       | 16 |
| 3 | 428.265616        | 214.636446      | 411.239067     | 206.123172       |                |                  | K    | <b>1538.890070</b> | <b>769.948673</b> | 1521.863521    | 761.435399       | 1520.879505    | 760.943390       | 15 |
| 4 | 485.287080        | 243.147178      | 468.260531     | 234.633904       |                |                  | G    | <b>1410.795107</b> | 705.901191        | 1393.768558    | 697.387917       | 1392.784542    | 696.895909       | 14 |
| 5 | <b>542.308544</b> | 271.657910      | 525.281995     | 263.144636       |                |                  | G    | <b>1353.773643</b> | 677.390460        | 1336.747094    | 668.877185       | 1335.763078    | 668.385177       | 13 |
| 6 | <b>641.376958</b> | 321.192117      | 624.350409     | 312.678843       |                |                  | V    | <b>1296.752179</b> | 648.879727        | 1279.725630    | 640.366453       | 1278.741614    | 639.874445       | 12 |

|    |                    |                   |                    |            |             |            |   |                    |                   |             |            |             |            |           |
|----|--------------------|-------------------|--------------------|------------|-------------|------------|---|--------------------|-------------------|-------------|------------|-------------|------------|-----------|
| 7  | <b>740.445372</b>  | 370.726324        | 723.418823         | 362.213050 |             |            | V | <b>1197.683765</b> | 599.345521        | 1180.657216 | 590.832246 | 1179.673200 | 590.340238 | <b>11</b> |
| 8  | 853.529436         | 427.268356        | 836.502887         | 418.755082 |             |            | L | <b>1098.615351</b> | 549.811314        | 1081.588802 | 541.298039 | 1080.604786 | 540.806031 | <b>10</b> |
| 9  | <b>981.624399</b>  | 491.315838        | 964.597850         | 482.802563 |             |            | K | <b>985.531287</b>  | 493.269282        | 968.504738  | 484.756007 | 967.520722  | 484.263999 | <b>9</b>  |
| 10 | <b>1110.666992</b> | 555.837134        | 1093.640443        | 547.323860 | 1092.656427 | 546.831852 | E | <b>857.436324</b>  | <b>429.221800</b> | 840.409775  | 420.708526 | 839.425759  | 420.216518 | <b>8</b>  |
| 11 | <b>1225.693935</b> | <b>613.350606</b> | 1208.667386        | 604.837331 | 1207.683370 | 604.345323 | D | 728.393731         | 364.700503        | 711.367182  | 356.187229 | 710.383166  | 355.695221 | <b>7</b>  |
| 12 | <b>1296.731049</b> | 648.869163        | 1279.704500        | 640.355888 | 1278.720484 | 639.863880 | A | <b>613.366788</b>  | 307.187032        | 596.340239  | 298.673757 |             |            | <b>6</b>  |
| 13 | <b>1409.815113</b> | 705.411195        | 1392.788564        | 696.897920 | 1391.804548 | 696.405912 | L | <b>542.329674</b>  | 271.668475        | 525.303125  | 263.155200 |             |            | <b>5</b>  |
| 14 | 1506.867877        | 753.937577        | 1489.841328        | 745.424302 | 1488.857312 | 744.932294 | P | <b>429.245610</b>  | 215.126443        | 412.219061  | 206.613168 |             |            | <b>4</b>  |
| 15 | 1563.889341        | 782.448309        | 1546.862792        | 773.935034 | 1545.878776 | 773.443026 | G | 332.192846         | 166.600061        | 315.166297  | 158.086786 |             |            | <b>3</b>  |
| 16 | 1691.947919        | 846.477598        | <b>1674.921370</b> | 837.964323 | 1673.937354 | 837.472315 | Q | 275.171382         | 138.089329        | 258.144833  | 129.576054 |             |            | <b>2</b>  |
| 17 |                    |                   |                    |            |             |            | K | 147.112804         | 74.060040         | 130.086255  | 65.546765  |             |            | <b>1</b>  |

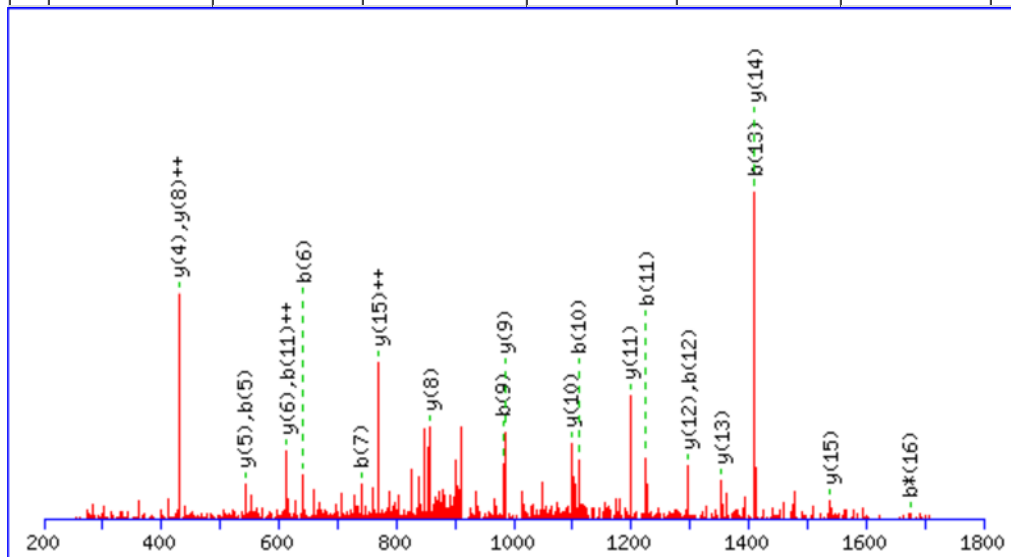

## Peptide View

MS/MS Fragmentation of **TGAVYVAEIGAK**

Found in **IPI00552937**, Tax\_Id=9606 Gene\_Symbol=NHLRC3 NHL repeat-containing protein 3

Experiment: 23 - NOPC2 Fraction: NOPC2



Match to Query 5814: 1177.632048 from(589.823300,2+)

Title: OECHL100312\_32.11299.11299.2.dta

Data file \\Boromir\masse\Data LTQ-Orbitrap\Chrystelle Lacroix\Etude clinique sJPU\OECHL100312\_32.raw

**Monoisotopic mass of neutral peptide Mr(calc):** 1177.634277**Fixed modifications:** Carbamidomethyl (C) (apply to specified residues or termini only)**Ions Score:** 63**Expect:** 3.3e-005**Matches :** 17/102 fragment ions using 32 most intense peaks ([help](#))

| #  | b           | b <sup>++</sup> | b <sup>0</sup> | b <sup>0++</sup> | Seq. | y           | y <sup>++</sup> | y*          | y <sup>*++</sup> | y <sup>0</sup> | y <sup>0++</sup> | #  |
|----|-------------|-----------------|----------------|------------------|------|-------------|-----------------|-------------|------------------|----------------|------------------|----|
| 1  | 102.054955  | 51.531116       | 84.044390      | 42.525833        | T    |             |                 |             |                  |                |                  | 12 |
| 2  | 159.076419  | 80.041847       | 141.065854     | 71.036565        | G    | 1077.593888 | 539.300582      | 1060.567339 | 530.787308       | 1059.583323    | 530.295300       | 11 |
| 3  | 230.113533  | 115.560404      | 212.102968     | 106.555122       | A    | 1020.572424 | 510.789850      | 1003.545875 | 502.276576       | 1002.561859    | 501.784568       | 10 |
| 4  | 329.181947  | 165.094611      | 311.171382     | 156.089329       | V    | 949.535310  | 475.271293      | 932.508761  | 466.758019       | 931.524745     | 466.266011       | 9  |
| 5  | 492.245276  | 246.626276      | 474.234711     | 237.620994       | Y    | 850.466896  | 425.737086      | 833.440347  | 417.223812       | 832.456331     | 416.731804       | 8  |
| 6  | 591.313690  | 296.160483      | 573.303125     | 287.155201       | V    | 687.403567  | 344.205422      | 670.377018  | 335.692147       | 669.393002     | 335.200139       | 7  |
| 7  | 662.350804  | 331.679040      | 644.340239     | 322.673758       | A    | 588.335153  | 294.671215      | 571.308604  | 286.157940       | 570.324588     | 285.665932       | 6  |
| 8  | 791.393397  | 396.200337      | 773.382832     | 387.195054       | E    | 517.298039  | 259.152658      | 500.271490  | 250.639383       | 499.287474     | 250.147375       | 5  |
| 9  | 904.477461  | 452.742369      | 886.466896     | 443.737086       | I    | 388.255446  | 194.631361      | 371.228897  | 186.118087       |                |                  | 4  |
| 10 | 961.498925  | 481.253101      | 943.488360     | 472.247818       | G    | 275.171382  | 138.089329      | 258.144833  | 129.576055       |                |                  | 3  |
| 11 | 1032.536039 | 516.771658      | 1014.525474    | 507.766375       | A    | 218.149918  | 109.578597      | 201.123369  | 101.065322       |                |                  | 2  |
| 12 |             |                 |                |                  | K    | 147.112804  | 74.060040       | 130.086255  | 65.546765        |                |                  | 1  |

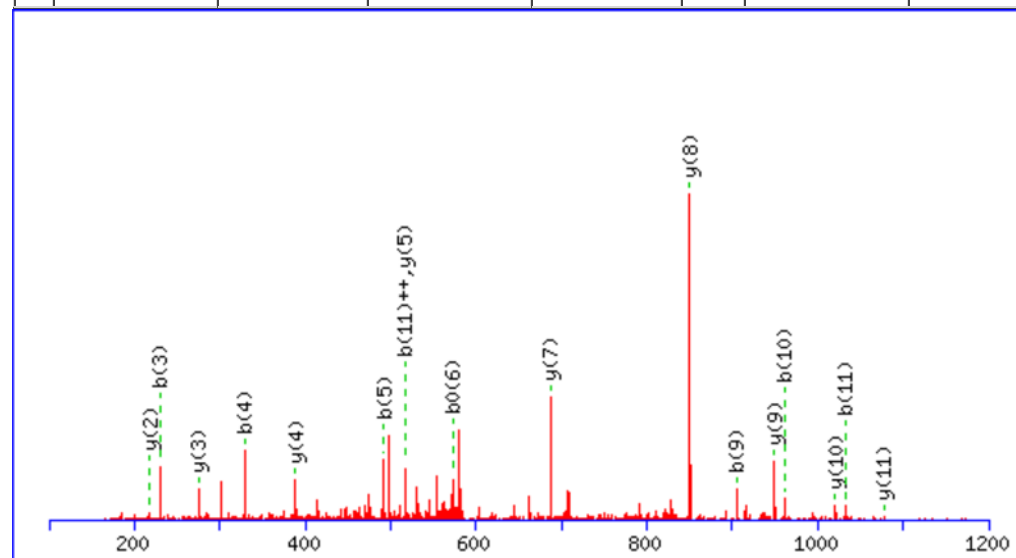

## Peptide View

MS/MS Fragmentation of **SAEEQNFLQLQSSR**

Found in **IPI00045033**, Tax\_Id=9606 Gene\_Symbol=CD209 Isoform 6 of CD209 antigen

**Experiment:** 23 - NOPC2 **Fraction:** NOPC2

Match to Query 10738: 1635.785248 from(818.899900,2+)

Title: OECHL100312\_32.14278.14278.2.dta

Data file \\Boromir\masse\Data LTQ-Orbitrap\Chrystelle Lacroix\Etude clinique sJPU\OECHL100312\_32.raw

**Monoisotopic mass of neutral peptide Mr(calc):** 1635.785233 **Fixed modifications:** Carbamidomethyl (C) (apply to specified residues or termini only) **Ions Score:** 78

**Expect:** 2.5e-006 **Matches :** 20/146 fragment ions using 28 most intense peaks ([help](#))

| #  | b                  | b <sup>++</sup> | b*                 | b <sup>*++</sup> | b <sup>0</sup>     | b <sup>0++</sup> | Seq. | y                  | y <sup>++</sup> | y*          | y <sup>*++</sup> | y <sup>0</sup> | y <sup>0++</sup> | #  |
|----|--------------------|-----------------|--------------------|------------------|--------------------|------------------|------|--------------------|-----------------|-------------|------------------|----------------|------------------|----|
| 1  | 88.039304          | 44.523290       |                    |                  | 70.028739          | 35.518008        | S    |                    |                 |             |                  |                |                  | 14 |
| 2  | 159.076418         | 80.041847       |                    |                  | 141.065853         | 71.036564        | A    | 1549.760511        | 775.383893      | 1532.733962 | 766.870619       | 1531.749946    | 766.378611       | 13 |
| 3  | <b>288.119011</b>  | 144.563144      |                    |                  | 270.108446         | 135.557861       | E    | 1478.723397        | 739.865336      | 1461.696848 | 731.352062       | 1460.712832    | 730.860054       | 12 |
| 4  | <b>417.161604</b>  | 209.084440      |                    |                  | 399.151039         | 200.079158       | E    | 1349.680804        | 675.344040      | 1332.654255 | 666.830765       | 1331.670239    | 666.338757       | 11 |
| 5  | 545.220182         | 273.113729      | 528.193633         | 264.600455       | 527.209617         | 264.108447       | Q    | <b>1220.638211</b> | 610.822743      | 1203.611662 | 602.309469       | 1202.627646    | 601.817461       | 10 |
| 6  | 659.263109         | 330.135193      | 642.236560         | 321.621918       | 641.252544         | 321.129910       | N    | <b>1092.579633</b> | 546.793454      | 1075.553084 | 538.280180       | 1074.569068    | 537.788172       | 9  |
| 7  | <b>806.331523</b>  | 403.669400      | 789.304974         | 395.156125       | 788.320958         | 394.664117       | F    | <b>978.536706</b>  | 489.771991      | 961.510157  | 481.258716       | 960.526141     | 480.766708       | 8  |
| 8  | <b>919.415587</b>  | 460.211432      | 902.389038         | 451.698157       | 901.405022         | 451.206149       | L    | <b>831.468292</b>  | 416.237784      | 814.441743  | 407.724509       | 813.457727     | 407.232501       | 7  |
| 9  | <b>1047.474165</b> | 524.240720      | <b>1030.447616</b> | 515.727446       | 1029.463600        | 515.235438       | Q    | <b>718.384228</b>  | 359.695752      | 701.357679  | 351.182477       | 700.373663     | 350.690469       | 6  |
| 10 | <b>1160.558229</b> | 580.782752      | 1143.531680        | 572.269478       | 1142.547664        | 571.777470       | L    | <b>590.325650</b>  | 295.666463      | 573.299101  | 287.153189       | 572.315085     | 286.661181       | 5  |
| 11 | <b>1288.616807</b> | 644.812041      | 1271.590258        | 636.298767       | 1270.606242        | 635.806759       | Q    | <b>477.241586</b>  | 239.124431      | 460.215037  | 230.611156       | 459.231021     | 230.119148       | 4  |
| 12 | <b>1375.648835</b> | 688.328055      | 1358.622286        | 679.814781       | 1357.638270        | 679.322773       | S    | <b>349.183008</b>  | 175.095142      | 332.156459  | 166.581868       | 331.172443     | 166.089860       | 3  |
| 13 | <b>1462.680863</b> | 731.844069      | 1445.654314        | 723.330795       | <b>1444.670298</b> | 722.838787       | S    | <b>262.150980</b>  | 131.579128      | 245.124431  | 123.065854       | 244.140415     | 122.573846       | 2  |
| 14 |                    |                 |                    |                  |                    |                  | R    | 175.118952         | 88.063114       | 158.092403  | 79.549839        |                |                  | 1  |

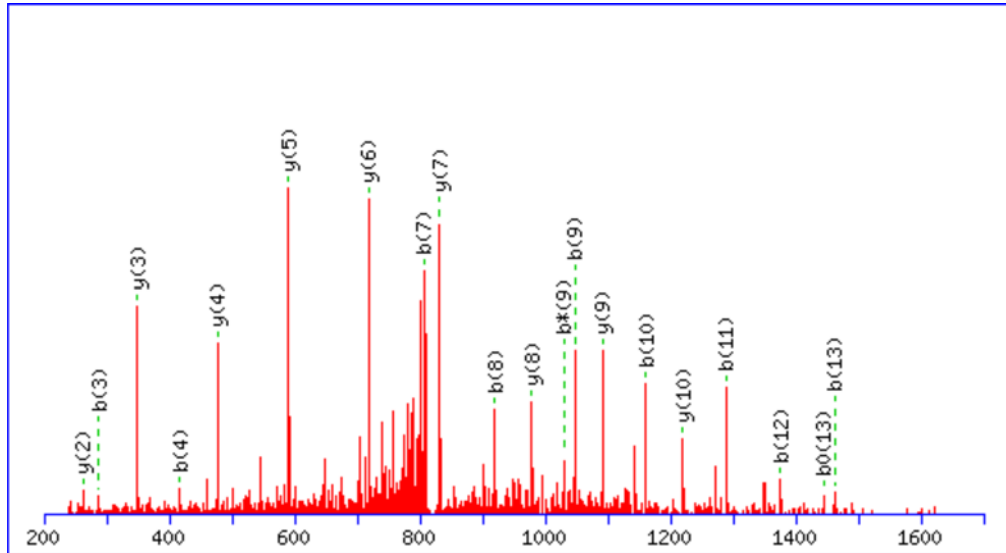

## Peptide View

MS/MS Fragmentation of **DAEEDDSLANSDDLKELLETDGDNRR**

Found in **IPI00000828**, Tax\_Id=9606 Gene\_Symbol=PENK Proenkephalin-A

**Experiment:** 23 - NOPC2 **Fraction:** NOPC2

Match to Query 17645: 3033.407172 from(1012.143000,3+)

Title: OECHL100312\_32.20692.20692.3.dta

Data file \\Boromir\masse\Data LTQ-Orbitrap\Chrystelle Lacroix\Etude clinique sJPU\OECHL100312\_32.raw

**Monoisotopic mass of neutral peptide Mr(calc):** 3033.401001 **Fixed modifications:** Carbamidomethyl (C) (apply to specified residues or termini only) **Ions Score:** 77

**Expect:** 3.8e-006 **Matches :** 54/292 fragment ions using 102 most intense peaks ([help](#))

| # | b                 | b <sup>++</sup> | b* | b* <sup>++</sup> | b <sup>0</sup>    | b <sup>0++</sup> | Seq. | y           | y <sup>++</sup>    | y*          | y* <sup>++</sup>   | y <sup>0</sup> | y <sup>0++</sup> |
|---|-------------------|-----------------|----|------------------|-------------------|------------------|------|-------------|--------------------|-------------|--------------------|----------------|------------------|
| 1 | 116.034219        | 58.520748       |    |                  | 98.023654         | 49.515465        | D    |             |                    |             |                    |                |                  |
| 2 | 187.071333        | 94.039304       |    |                  | 169.060768        | 85.034022        | A    | 2919.381392 | 1460.194334        | 2902.354843 | 1451.681059        | 2901.370827    | 1451.1890        |
| 3 | <b>316.113926</b> | 158.560601      |    |                  | 298.103361        | 149.555319       | E    | 2848.344278 | <b>1424.675777</b> | 2831.317729 | <b>1416.162502</b> | 2830.333713    | <b>1415.6704</b> |
| 4 | <b>445.156519</b> | 223.081898      |    |                  | <b>427.145954</b> | 214.076615       | E    | 2719.301685 | <b>1360.154480</b> | 2702.275136 | <b>1351.641206</b> | 2701.291120    | <b>1351.1491</b> |
| 5 | <b>560.183462</b> | 280.595369      |    |                  | 542.172897        | 271.590087       | D    | 2590.259092 | <b>1295.633184</b> | 2573.232543 | <b>1287.119909</b> | 2572.248527    | 1286.6279        |
| 6 | <b>675.210405</b> | 338.108841      |    |                  | 657.199840        | 329.103558       | D    | 2475.232149 | <b>1238.119712</b> | 2458.205600 | <b>1229.606438</b> | 2457.221584    | <b>1229.1144</b> |

|    |                    |                    |                    |                    |                    |                    |          |                    |                    |             |             |             |                 |
|----|--------------------|--------------------|--------------------|--------------------|--------------------|--------------------|----------|--------------------|--------------------|-------------|-------------|-------------|-----------------|
| 7  | <b>762.242433</b>  | 381.624855         |                    |                    | <b>744.231868</b>  | 372.619572         | <b>S</b> | 2360.205206        | <b>1180.606241</b> | 2343.178657 | 1172.092966 | 2342.194641 | 1171.6009       |
| 8  | <b>875.326497</b>  | 438.166887         |                    |                    | <b>857.315932</b>  | 429.161604         | <b>L</b> | 2273.173178        | <b>1137.090227</b> | 2256.146629 | 1128.576952 | 2255.162613 | 1128.0849       |
| 9  | 946.363611         | 473.685444         |                    |                    | 928.353046         | 464.680161         | <b>A</b> | 2160.089114        | <b>1080.548195</b> | 2143.062565 | 1072.034920 | 2142.078549 | 1071.5429       |
| 10 | 1060.406538        | 530.706907         | 1043.379989        | 522.193633         | 1042.395973        | 521.701624         | <b>N</b> | 2089.052000        | <b>1045.029638</b> | 2072.025451 | 1036.516363 | 2071.041435 | 1036.0243       |
| 11 | 1147.438566        | <b>574.222921</b>  | 1130.412017        | 565.709647         | <b>1129.428001</b> | 565.217639         | <b>S</b> | 1975.009073        | <b>988.008174</b>  | 1957.982524 | 979.494900  | 1956.998508 | 979.0028        |
| 12 | 1234.470594        | 617.738935         | 1217.444045        | 609.225661         | 1216.460029        | 608.733653         | <b>S</b> | 1887.977045        | <b>944.492160</b>  | 1870.950496 | 935.978886  | 1869.966480 | 935.4868        |
| 13 | 1349.497537        | <b>675.252407</b>  | 1332.470988        | <b>666.739132</b>  | 1331.486972        | <b>666.247124</b>  | <b>D</b> | <b>1800.945017</b> | 900.976146         | 1783.918468 | 892.462872  | 1782.934452 | 891.9708        |
| 14 | 1462.581601        | <b>731.794439</b>  | 1445.555052        | 723.281164         | 1444.571036        | 722.789156         | <b>L</b> | 1685.918074        | <b>843.462675</b>  | 1668.891525 | 834.949400  | 1667.907509 | 834.4573        |
| 15 | <b>1575.665665</b> | 788.336471         | <b>1558.639116</b> | 779.823196         | 1557.655100        | 779.331188         | <b>L</b> | 1572.834010        | 786.920643         | 1555.807461 | 778.407368  | 1554.823445 | 777.9153        |
| 16 | 1703.760628        | 852.383952         | 1686.734079        | <b>843.870678</b>  | 1685.750063        | <b>843.378670</b>  | <b>K</b> | 1459.749946        | <b>730.378611</b>  | 1442.723397 | 721.865336  | 1441.739381 | <b>721.3733</b> |
| 17 | <b>1832.803221</b> | 916.905248         | 1815.776672        | 908.391974         | 1814.792656        | <b>907.899966</b>  | <b>E</b> | 1331.654983        | <b>666.331129</b>  | 1314.628434 | 657.817855  | 1313.644418 | 657.3258        |
| 18 | 1945.887285        | 973.447280         | 1928.860736        | 964.934006         | 1927.876720        | 964.441998         | <b>L</b> | 1202.612390        | 601.809833         | 1185.585841 | 593.296558  | 1184.601825 | 592.8045        |
| 19 | 2058.971349        | 1029.989312        | 2041.944800        | 1021.476038        | 2040.960784        | 1020.984030        | <b>L</b> | 1089.528326        | <b>545.267801</b>  | 1072.501777 | 536.754526  | 1071.517761 | 536.2625        |
| 20 | 2188.013942        | 1094.510609        | 2170.987393        | 1085.997334        | 2170.003377        | 1085.505326        | <b>E</b> | 976.444262         | <b>488.725769</b>  | 959.417713  | 480.212494  | 958.433697  | 479.7204        |
| 21 | 2289.061621        | 1145.034448        | 2272.035072        | 1136.521174        | 2271.051056        | 1136.029166        | <b>T</b> | 847.401669         | <b>424.204472</b>  | 830.375120  | 415.691198  | 829.391104  | 415.1991        |
| 22 | 2346.083085        | 1173.545180        | 2329.056536        | <b>1165.031906</b> | 2328.072520        | <b>1164.539898</b> | <b>G</b> | 746.353990         | <b>373.680633</b>  | 729.327441  | 365.167358  | 728.343425  | 364.6753        |
| 23 | 2461.110028        | 1231.058652        | 2444.083479        | 1222.545377        | 2443.099463        | 1222.053369        | <b>D</b> | 689.332526         | 345.169901         | 672.305977  | 336.656626  | 671.321961  | 336.1646        |
| 24 | 2575.152955        | <b>1288.080115</b> | 2558.126406        | 1279.566841        | 2557.142390        | <b>1279.074833</b> | <b>N</b> | <b>574.305583</b>  | <b>287.656430</b>  | 557.279034  | 279.143155  | 556.295018  | 278.6511        |
| 25 | 2731.254066        | 1366.130671        | 2714.227517        | 1357.617396        | 2713.243501        | 1357.125388        | <b>R</b> | 460.262656         | 230.634966         | 443.236107  | 222.121692  | 442.252091  | 221.6296        |
| 26 | 2860.296659        | 1430.651967        | 2843.270110        | <b>1422.138693</b> | 2842.286094        | 1421.646685        | <b>E</b> | 304.161545         | 152.584411         | 287.134996  | 144.071136  | 286.150980  | 143.5791        |
| 27 |                    |                    |                    |                    |                    |                    | <b>R</b> | 175.118952         | 88.063114          | 158.092403  | 79.549839   |             |                 |

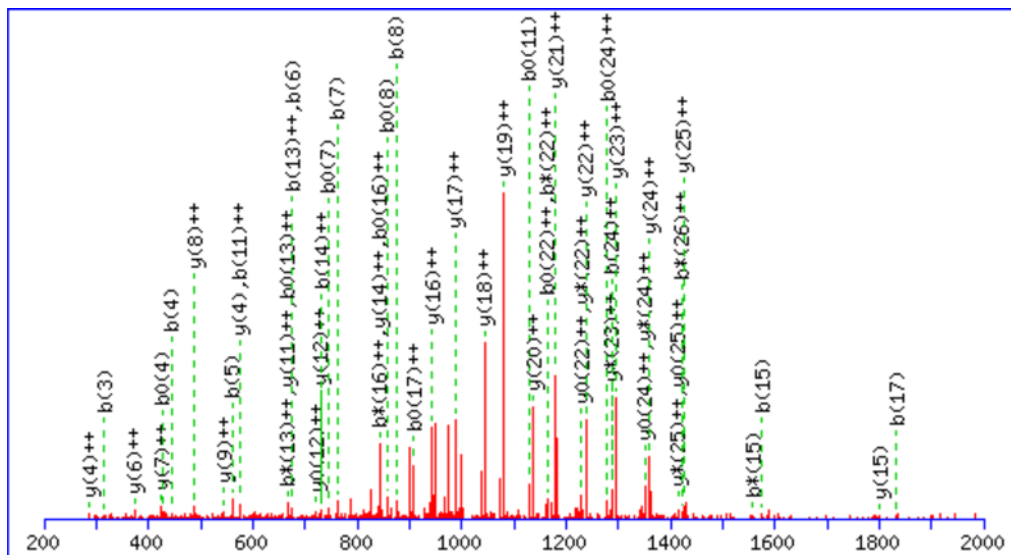

## Peptide View

MS/MS Fragmentation of **KAGPCEQAGSPCR**

Found in **IP100028381**, Tax\_Id=9606 Gene\_Symbol=DLK2 Isoform 1 of Protein delta homolog 2

**Experiment:** 23 - NOPC2 **Fraction:** NOPC2

Match to Query 8792: 1416.624448 from(709.319500,2+)

Title: OECHL100312\_32.2328.2328.2.data

Data file \\Boromir\masse\Data LTQ-Orbitrap\Chrystelle Lacroix\Etude clinique sJPU\OECHL100312\_32.raw

**Monoisotopic mass of neutral peptide Mr(calc):** 1416.623810 **Fixed modifications:** Carbamidomethyl (C) (apply to specified residues or termini only) **Ions Score:** 67

**Expect:** 1.1e-005 **Matches :** 20/128 fragment ions using 36 most intense peaks ([help](#))

| # | b          | b <sup>++</sup>   | b*         | b* <sup>++</sup> | b <sup>0</sup> | b <sup>0++</sup> | Seq.     | y                  | y <sup>++</sup>   | y*          | y* <sup>++</sup> | y <sup>0</sup> | y <sup>0++</sup> | #         |
|---|------------|-------------------|------------|------------------|----------------|------------------|----------|--------------------|-------------------|-------------|------------------|----------------|------------------|-----------|
| 1 | 129.102239 | 65.054757         | 112.075690 | 56.541483        |                |                  | <b>K</b> |                    |                   |             |                  |                |                  | <b>13</b> |
| 2 | 200.139353 | 100.573315        | 183.112804 | 92.060040        |                |                  | <b>A</b> | <b>1289.536133</b> | <b>645.271705</b> | 1272.509584 | 636.758430       | 1271.525568    | 636.266422       | <b>12</b> |
| 3 | 257.160817 | 129.084047        | 240.134268 | 120.570772       |                |                  | <b>G</b> | <b>1218.499019</b> | 609.753148        | 1201.472470 | 601.239873       | 1200.488454    | 600.747865       | <b>11</b> |
| 4 | 354.213581 | 177.610429        | 337.187032 | 169.097154       |                |                  | <b>P</b> | <b>1161.477555</b> | <b>581.242416</b> | 1144.451006 | 572.729141       | 1143.466990    | 572.237133       | <b>10</b> |
| 5 | 514.244230 | <b>257.625753</b> | 497.217681 | 249.112479       |                |                  | <b>C</b> | <b>1064.424791</b> | 532.716034        | 1047.398242 | 524.202759       | 1046.414226    | 523.710751       | <b>9</b>  |
| 6 | 643.286823 | 322.147050        | 626.260274 | 313.633775       | 625.276258     | 313.141767       | <b>E</b> | <b>904.394142</b>  | 452.700709        | 887.367593  | 444.187434       | 886.383577     | 443.695427       | <b>8</b>  |

|    |                   |            |             |            |                    |            |   |                   |            |                   |                   |            |                   |   |
|----|-------------------|------------|-------------|------------|--------------------|------------|---|-------------------|------------|-------------------|-------------------|------------|-------------------|---|
| 7  | 771.345401        | 386.176339 | 754.318852  | 377.663064 | 753.334836         | 377.171056 | Q | <b>775.351549</b> | 388.179413 | 758.325000        | 379.666138        | 757.340984 | 379.174130        | 7 |
| 8  | <b>842.382515</b> | 421.694896 | 825.355966  | 413.181621 | 824.371950         | 412.689613 | A | 647.292971        | 324.150124 | 630.266422        | <b>315.636849</b> | 629.282406 | <b>315.144841</b> | 6 |
| 9  | <b>899.403979</b> | 450.205628 | 882.377430  | 441.692353 | 881.393414         | 441.200345 | G | <b>576.255857</b> | 288.631567 | 559.229308        | 280.118292        | 558.245292 | 279.626284        | 5 |
| 10 | <b>986.436007</b> | 493.721642 | 969.409458  | 485.208367 | 968.425442         | 484.716359 | S | <b>519.234393</b> | 260.120835 | 502.207844        | 251.607560        | 501.223828 | 251.115552        | 4 |
| 11 | 1083.488771       | 542.248024 | 1066.462222 | 533.734749 | <b>1065.478206</b> | 533.242741 | P | <b>432.202365</b> | 216.604820 | <b>415.175816</b> | 208.091546        |            |                   | 3 |
| 12 | 1243.519420       | 622.263348 | 1226.492871 | 613.750074 | 1225.508855        | 613.258066 | C | <b>335.149601</b> | 168.078438 | 318.123052        | 159.565164        |            |                   | 2 |
| 13 |                   |            |             |            |                    |            | R | 175.118952        | 88.063114  | 158.092403        | 79.549839         |            |                   | 1 |

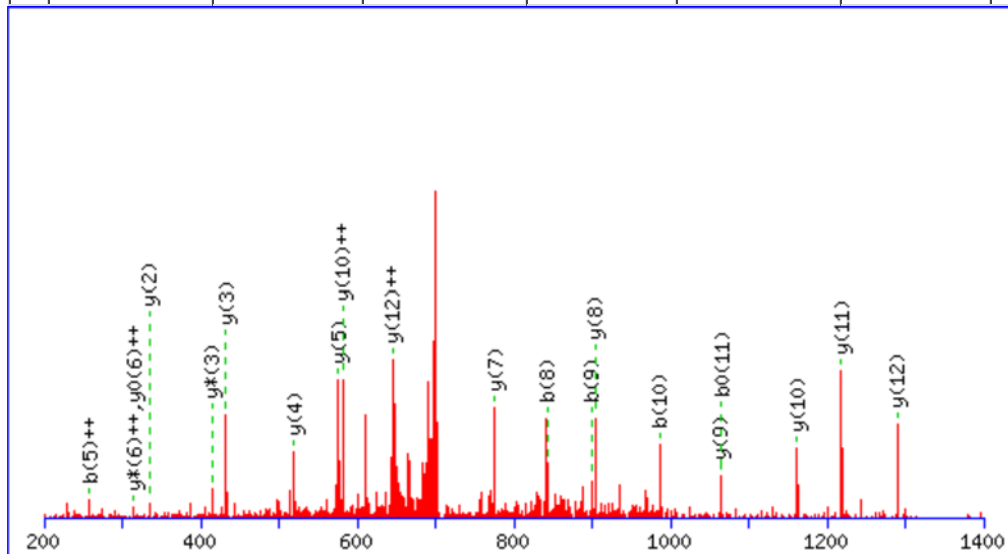

## Peptide View

MS/MS Fragmentation of **LLDDLVTCASR**

Found in **IPI00299485**, Tax\_Id=9606 Gene\_Symbol=CD93 Complement component C1q receptor

**Experiment:** 23 - NOPC2 **Fraction:** NOPC2

Match to Query 7251: 1261.633848 from(631.824200,2+)

Title: OECHL100312\_32.15071.15071.2.dta

Data file \\Boromir\masse\Data LTQ-Orbitrap\Chrystelle Lacroix\Etude clinique sJPU\OECHL100312\_32.raw

**Monoisotopic mass of neutral peptide Mr(calc):** 1261.633636 **Fixed modifications:** Carbamidomethyl (C) (apply to specified residues or termini only) **Ions Score:** 67

**Expect:** 2.6e-005 **Matches :** 10/94 fragment ions using 11 most intense peaks ([help](#))

| #  | b                  | b <sup>++</sup> | b <sup>0</sup> | b <sup>0++</sup> | Seq. | y                  | y <sup>++</sup> | y <sup>*</sup> | y <sup>*++</sup> | y <sup>0</sup> | y <sup>0++</sup> | #  |
|----|--------------------|-----------------|----------------|------------------|------|--------------------|-----------------|----------------|------------------|----------------|------------------|----|
| 1  | 114.091340         | 57.549308       |                |                  | L    |                    |                 |                |                  |                |                  | 11 |
| 2  | 227.175404         | 114.091340      |                |                  | L    | 1149.556850        | 575.282063      | 1132.530301    | 566.768789       | 1131.546285    | 566.276781       | 10 |
| 3  | 342.202347         | 171.604811      | 324.191782     | 162.599529       | D    | <b>1036.472786</b> | 518.740031      | 1019.446237    | 510.226757       | 1018.462221    | 509.734749       | 9  |
| 4  | <b>457.229290</b>  | 229.118283      | 439.218725     | 220.113001       | D    | <b>921.445843</b>  | 461.226560      | 904.419294     | 452.713285       | 903.435278     | 452.221277       | 8  |
| 5  | <b>570.313354</b>  | 285.660315      | 552.302789     | 276.655033       | L    | <b>806.418900</b>  | 403.713088      | 789.392351     | 395.199814       | 788.408335     | 394.707806       | 7  |
| 6  | 669.381768         | 335.194522      | 651.371203     | 326.189239       | V    | <b>693.334836</b>  | 347.171056      | 676.308287     | 338.657782       | 675.324271     | 338.165774       | 6  |
| 7  | 770.429447         | 385.718362      | 752.418882     | 376.713079       | T    | <b>594.266422</b>  | 297.636849      | 577.239873     | 289.123575       | 576.255857     | 288.631567       | 5  |
| 8  | 930.460096         | 465.733686      | 912.449531     | 456.728404       | C    | 493.218743         | 247.113010      | 476.192194     | 238.599735       | 475.208178     | 238.107727       | 4  |
| 9  | 1001.497210        | 501.252243      | 983.486645     | 492.246961       | A    | <b>333.188094</b>  | 167.097685      | 316.161545     | 158.584410       | 315.177529     | 158.092402       | 3  |
| 10 | <b>1088.529238</b> | 544.768257      | 1070.518673    | 535.762975       | S    | <b>262.150980</b>  | 131.579128      | 245.124431     | 123.065854       | 244.140415     | 122.573846       | 2  |
| 11 |                    |                 |                |                  | R    | 175.118952         | 88.063114       | 158.092403     | 79.549839        |                |                  | 1  |

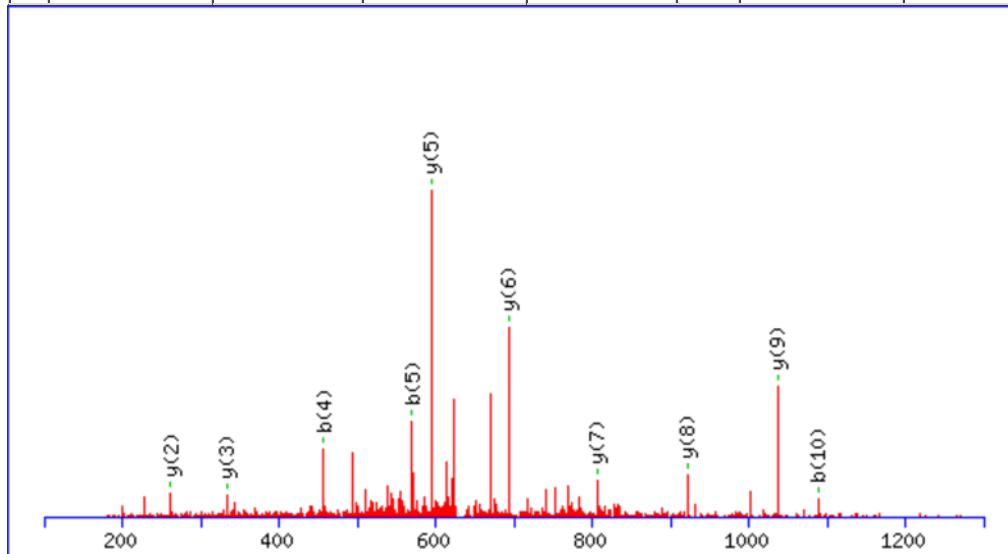

## Peptide View

MS/MS Fragmentation of **LLIYDASNLETGVPSR**

Found in **IP100003111**, Tax\_Id=9606 Gene\_Symbol=LOC652694 Ig kappa chain V-I region AU

**Experiment: 23 - NOPC2 Fraction: NOPC2**

Match to Query 12275: 1746.917048 from(874.465800,2+)

Title: OECHL100312\_32.17167.17167.2.dta

Data file \\Boromir\masse\Data LTQ-Orbitrap\Chrystelle Lacroix\Etude clinique sJPU\OECHL100312\_32.raw

**Monoisotopic mass of neutral peptide Mr(calc): 1746.915192**Fixed modifications: Carbamidomethyl (C) (apply to specified residues or termini only)**Ions Score: 59****Expect: 0.00012**Matches : 24/156 fragment ions using 45 most intense peaks ([help](#))

| #  | b                  | b <sup>++</sup>   | b <sup>*</sup>     | b <sup>*++</sup> | b <sup>0</sup>     | b <sup>0++</sup> | Seq. | y                  | y <sup>++</sup>   | y <sup>*</sup>    | y <sup>*++</sup> | y <sup>0</sup>     | y <sup>0++</sup> | #  |
|----|--------------------|-------------------|--------------------|------------------|--------------------|------------------|------|--------------------|-------------------|-------------------|------------------|--------------------|------------------|----|
| 1  | 114.091340         | 57.549308         |                    |                  |                    |                  | L    |                    |                   |                   |                  |                    |                  | 16 |
| 2  | 227.175404         | 114.091340        |                    |                  |                    |                  | L    | 1634.838427        | 817.922852        | 1617.811878       | 809.409577       | 1616.827862        | 808.917569       | 15 |
| 3  | 340.259468         | 170.633372        |                    |                  |                    |                  | I    | <b>1521.754363</b> | <b>761.380820</b> | 1504.727814       | 752.867545       | 1503.743798        | 752.375537       | 14 |
| 4  | 503.322797         | 252.165036        |                    |                  |                    |                  | Y    | 1408.670299        | 704.838788        | 1391.643750       | 696.325513       | <b>1390.659734</b> | 695.833505       | 13 |
| 5  | 618.349740         | 309.678508        |                    |                  | 600.339175         | 300.673226       | D    | <b>1245.606970</b> | 623.307123        | 1228.580421       | 614.793849       | 1227.596405        | 614.301841       | 12 |
| 6  | 689.386854         | 345.197065        |                    |                  | 671.376289         | 336.191782       | A    | <b>1130.580027</b> | 565.793652        | 1113.553478       | 557.280377       | 1112.569462        | 556.788369       | 11 |
| 7  | 776.418882         | 388.713079        |                    |                  | 758.408317         | 379.707796       | S    | <b>1059.542913</b> | 530.275095        | 1042.516364       | 521.761820       | 1041.532348        | 521.269812       | 10 |
| 8  | 890.461809         | 445.734542        | 873.435260         | 437.221268       | 872.451244         | 436.729260       | N    | 972.510885         | 486.759081        | 955.484336        | 478.245806       | 954.500320         | 477.753798       | 9  |
| 9  | <b>1003.545873</b> | 502.276574        | 986.519324         | 493.763300       | 985.535308         | 493.271292       | L    | <b>858.467958</b>  | 429.737617        | 841.441409        | 421.224343       | 840.457393         | 420.732335       | 8  |
| 10 | <b>1132.588466</b> | 566.797871        | 1115.561917        | 558.284597       | 1114.577901        | 557.792588       | E    | <b>745.383894</b>  | 373.195585        | 728.357345        | 364.682311       | 727.373329         | 364.190303       | 7  |
| 11 | <b>1233.636145</b> | <b>617.321710</b> | 1216.609596        | 608.808436       | 1215.625580        | 608.316428       | T    | <b>616.341301</b>  | 308.674289        | 599.314752        | 300.161014       | 598.330736         | 299.669006       | 6  |
| 12 | <b>1290.657609</b> | 645.832442        | 1273.631060        | 637.319168       | <b>1272.647044</b> | 636.827160       | G    | <b>515.293622</b>  | 258.150449        | 498.267073        | 249.637175       | 497.283057         | 249.145167       | 5  |
| 13 | <b>1389.726023</b> | 695.366649        | <b>1372.699474</b> | 686.853375       | 1371.715458        | 686.361367       | V    | <b>458.272158</b>  | 229.639717        | 441.245609        | 221.126443       | 440.261593         | 220.634435       | 4  |
| 14 | 1486.778787        | 743.893032        | 1469.752238        | 735.379757       | <b>1468.768222</b> | 734.887749       | P    | <b>359.203744</b>  | 180.105510        | <b>342.177195</b> | 171.592236       | <b>341.193179</b>  | 171.100228       | 3  |
| 15 | <b>1573.810815</b> | 787.409046        | 1556.784266        | 778.895771       | 1555.800250        | 778.403763       | S    | 262.150980         | 131.579128        | 245.124431        | 123.065854       | 244.140415         | 122.573846       | 2  |
| 16 |                    |                   |                    |                  |                    |                  | R    | 175.118952         | 88.063114         | 158.092403        | 79.549839        |                    |                  | 1  |



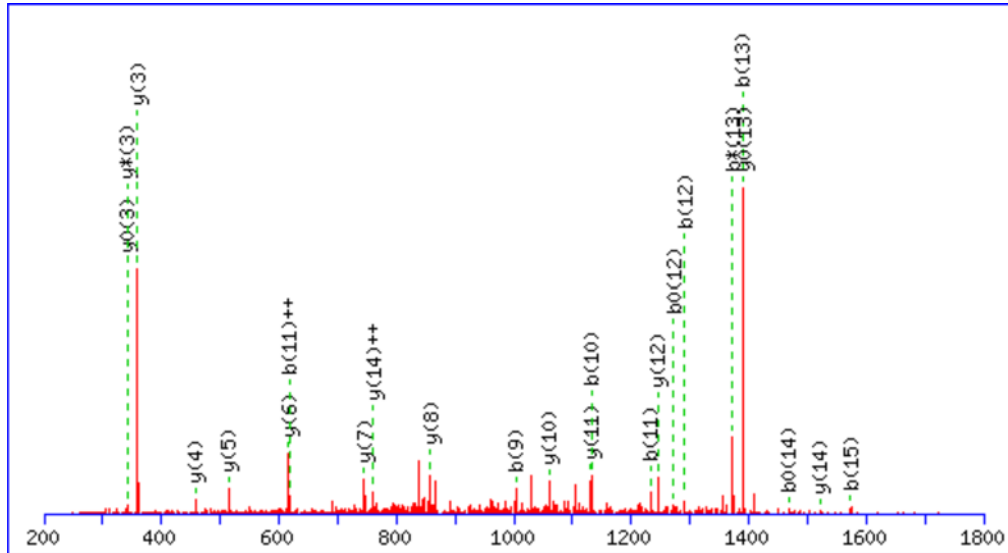

## Peptide View

MS/MS Fragmentation of **ALVQIVK**

Found in **IPI00216569**, Tax\_Id=9606 Gene\_Symbol=CST7 Cystatin-F precursor

**Experiment:** 23 - NOPC2 **Fraction:** NOPC2

Match to Query 887: 770.490648 from(386.252600,2+)

Title: OECHL100312\_32.11799.11799.2.dta

Data file \\Boromir\masse\Data LTQ-Orbitrap\Chrystelle Lacroix\Etude clinique sJPU\OECHL100312\_32.raw

**Monoisotopic mass of neutral peptide Mr(calc):** 770.490173 **Fixed modifications:** Carbamidomethyl (C) (apply to specified residues or termini only) **Variable modifications:** **Q4** : Deamidated (NQ) **Ions Score:** 55 **Expect:** 0.00012 **Matches :** 12/42 fragment ions using 18 most intense peaks ([help](#))

| # | b                 | b <sup>++</sup> | b*         | b <sup>*++</sup> | Seq. | y                 | y <sup>++</sup>   | y*         | y <sup>*++</sup> | # |
|---|-------------------|-----------------|------------|------------------|------|-------------------|-------------------|------------|------------------|---|
| 1 | 72.044390         | 36.525833       |            |                  | A    |                   |                   |            |                  | 7 |
| 2 | <b>185.128454</b> | 93.067865       |            |                  | L    | <b>700.460354</b> | <b>350.733815</b> | 683.433805 | 342.220541       | 6 |
| 3 | <b>284.196868</b> | 142.602072      |            |                  | V    | <b>587.376290</b> | <b>294.191783</b> | 570.349741 | 285.678509       | 5 |
| 4 | 413.239462        | 207.123369      | 396.212913 | 198.610095       | Q    | <b>488.307876</b> | 244.657576        | 471.281327 | 236.144301       | 4 |
| 5 | <b>526.323526</b> | 263.665401      | 509.296977 | 255.152127       | I    | <b>359.265282</b> | 180.136279        | 342.238733 | 171.623004       | 3 |
| 6 | <b>625.391940</b> | 313.199608      | 608.365391 | 304.686333       | V    | <b>246.181218</b> | 123.594247        | 229.154669 | 115.080972       | 2 |

|   |  |  |  |  |          |                   |           |            |           |          |
|---|--|--|--|--|----------|-------------------|-----------|------------|-----------|----------|
| 7 |  |  |  |  | <b>K</b> | <b>147.112804</b> | 74.060040 | 130.086255 | 65.546765 | <b>1</b> |
|---|--|--|--|--|----------|-------------------|-----------|------------|-----------|----------|

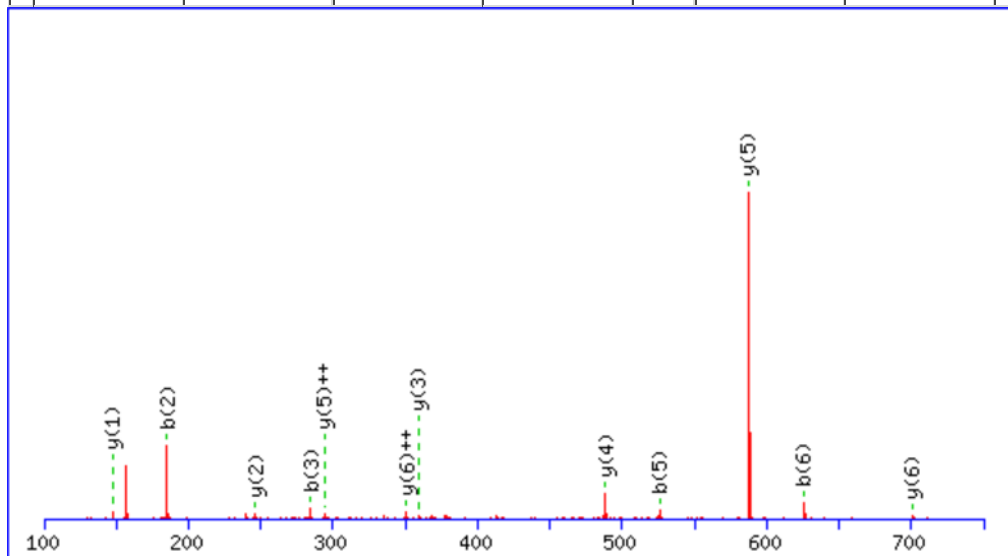

## Peptide View

MS/MS Fragmentation of **KITIADCGQLE**

Found in **IPI00419585**, Tax\_Id=9606 Gene\_Symbol=PPIA Peptidyl-prolyl cis-trans isomerase A

**Experiment:** 23 - NOPC2 **Fraction:** NOPC2

Match to Query 7073: 1246.626048 from(624.320300,2+)

Title: OECHL100312\_32.11241.11241.2.dta

Data file \\Boromir\masse\Data LTQ-Orbitrap\Chrystelle Lacroix\Etude clinique sJPU\OECHL100312\_32.raw

**Monoisotopic mass of neutral peptide Mr(calc):** 1246.622726 **Fixed modifications:** Carbamidomethyl (C) (apply to specified residues or termini only) **Ions Score:** 52

**Expect:** 0.00088 **Matches :** 26/112 fragment ions using 51 most intense peaks ([help](#))

| #        | b                 | b <sup>++</sup>   | b <sup>*</sup> | b <sup>*++</sup> | b <sup>0</sup>    | b <sup>0++</sup> | Seq.     | y                  | y <sup>++</sup> | y <sup>*</sup>     | y <sup>*++</sup> | y <sup>0</sup>     | y <sup>0++</sup>  | #         |
|----------|-------------------|-------------------|----------------|------------------|-------------------|------------------|----------|--------------------|-----------------|--------------------|------------------|--------------------|-------------------|-----------|
| <b>1</b> | 129.102239        | 65.054757         | 112.075690     | 56.541483        |                   |                  | <b>K</b> |                    |                 |                    |                  |                    |                   | <b>11</b> |
| <b>2</b> | <b>242.186303</b> | 121.596790        | 225.159754     | 113.083515       |                   |                  | <b>I</b> | 1119.535053        | 560.271165      | <b>1102.508504</b> | 551.757890       | <b>1101.524488</b> | <b>551.265882</b> | <b>10</b> |
| <b>3</b> | <b>343.233982</b> | 172.120629        | 326.207433     | 163.607355       | 325.223417        | 163.115347       | <b>T</b> | <b>1006.450989</b> | 503.729133      | 989.424440         | 495.215858       | <b>988.440424</b>  | 494.723850        | <b>9</b>  |
| <b>4</b> | <b>456.318046</b> | <b>228.662661</b> | 439.291497     | 220.149387       | <b>438.307481</b> | 219.657379       | <b>I</b> | <b>905.403310</b>  | 453.205293      | 888.376761         | 444.692019       | 887.392745         | 444.200011        | <b>8</b>  |
| <b>5</b> | <b>527.355160</b> | 264.181218        | 510.328611     | 255.667944       | 509.344595        | 255.175936       | <b>A</b> | <b>792.319246</b>  | 396.663261      | 775.292697         | 388.149987       | 774.308681         | 387.657979        | <b>7</b>  |

|    |                    |                   |             |                   |             |                   |          |                   |            |            |            |                   |            |          |
|----|--------------------|-------------------|-------------|-------------------|-------------|-------------------|----------|-------------------|------------|------------|------------|-------------------|------------|----------|
| 6  | <b>642.382103</b>  | 321.694690        | 625.355554  | 313.181415        | 624.371538  | 312.689407        | <b>D</b> | <b>721.282132</b> | 361.144704 | 704.255583 | 352.631430 | 703.271567        | 352.139422 | <b>6</b> |
| 7  | <b>802.412752</b>  | 401.710014        | 785.386203  | 393.196740        | 784.402187  | 392.704732        | <b>C</b> | <b>606.255189</b> | 303.631233 | 589.228640 | 295.117958 | 588.244624        | 294.625950 | <b>5</b> |
| 8  | <b>859.434216</b>  | 430.220746        | 842.407667  | 421.707472        | 841.423651  | 421.215464        | <b>G</b> | <b>446.224540</b> | 223.615908 | 429.197991 | 215.102634 | 428.213975        | 214.610626 | <b>4</b> |
| 9  | <b>987.492794</b>  | 494.250035        | 970.466245  | 485.736761        | 969.482229  | 485.244753        | <b>Q</b> | 389.203076        | 195.105176 | 372.176527 | 186.591902 | 371.192511        | 186.099894 | <b>3</b> |
| 10 | <b>1100.576858</b> | <b>550.792067</b> | 1083.550309 | <b>542.278793</b> | 1082.566293 | <b>541.786785</b> | <b>L</b> | <b>261.144498</b> | 131.075887 |            |            | <b>243.133933</b> | 122.070605 | <b>2</b> |
| 11 |                    |                   |             |                   |             |                   | <b>E</b> | 148.060434        | 74.533855  |            |            | 130.049869        | 65.528573  | <b>1</b> |

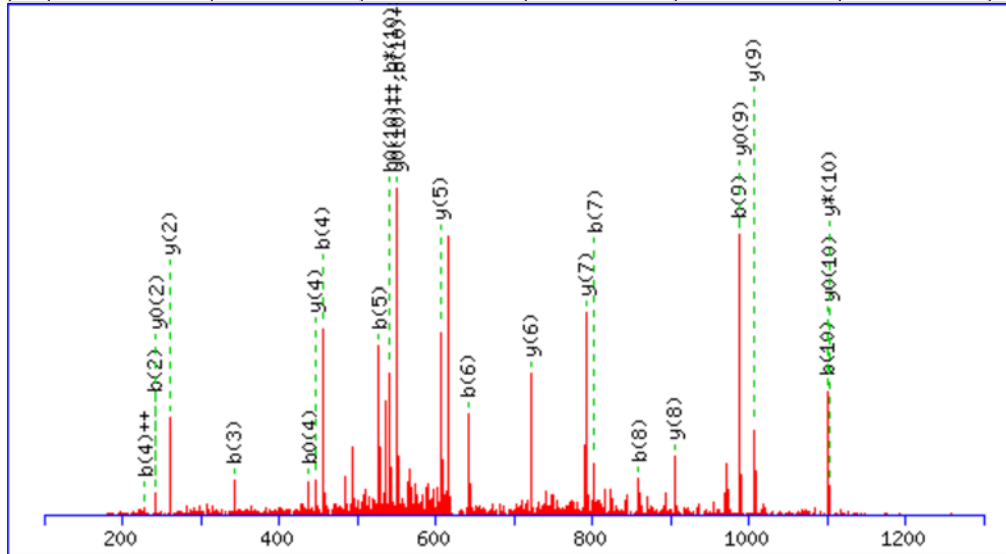

## Peptide View

MS/MS Fragmentation of **LAADDPEVR**

Found in **IP100025840**, Tax\_Id=9606 Gene\_Symbol=EFNA1 Isoform 1 of Ephrin-A1

**Experiment:** 23 - NOPC2 **Fraction:** NOPC2

Match to Query 3217: 984.487448 from(493.251000,2+)

Title: OECHL100312\_32.5390.5390.2.dta

Data file \\Boromir\masse\Data LTQ-Orbitrap\Chrystelle Lacroix\Etude clinique sJPU\OECHL100312\_32.raw

**Monoisotopic mass of neutral peptide Mr(calc):** 984.487610 **Fixed modifications:** Carbamidomethyl (C) (apply to specified residues or termini only) **Ions Score:** 50

**Expect:** 0.00068 **Matches :** 8/70 fragment ions using 9 most intense peaks ([help](#))

| # | b | b <sup>++</sup> | b <sup>0</sup> | b <sup>0++</sup> | Seq. | y | y <sup>++</sup> | y* | y* <sup>++</sup> | y <sup>0</sup> | y <sup>0++</sup> | # |
|---|---|-----------------|----------------|------------------|------|---|-----------------|----|------------------|----------------|------------------|---|
|---|---|-----------------|----------------|------------------|------|---|-----------------|----|------------------|----------------|------------------|---|

|   |            |            |            |            |   |            |            |            |            |            |            |   |
|---|------------|------------|------------|------------|---|------------|------------|------------|------------|------------|------------|---|
| 1 | 114.091340 | 57.549308  |            |            | L |            |            |            |            |            |            | 9 |
| 2 | 185.128454 | 93.067865  |            |            | A | 872.410837 | 436.709057 | 855.384288 | 428.195782 | 854.400272 | 427.703774 | 8 |
| 3 | 256.165568 | 128.586422 |            |            | A | 801.373723 | 401.190500 | 784.347174 | 392.677225 | 783.363158 | 392.185217 | 7 |
| 4 | 371.192511 | 186.099893 | 353.181946 | 177.094611 | D | 730.336609 | 365.671943 | 713.310060 | 357.158668 | 712.326044 | 356.666660 | 6 |
| 5 | 486.219454 | 243.613365 | 468.208889 | 234.608082 | D | 615.309666 | 308.158471 | 598.283117 | 299.645197 | 597.299101 | 299.153189 | 5 |
| 6 | 583.272218 | 292.139747 | 565.261653 | 283.134465 | P | 500.282723 | 250.644999 | 483.256174 | 242.131725 | 482.272158 | 241.639717 | 4 |
| 7 | 712.314811 | 356.661044 | 694.304246 | 347.655761 | E | 403.229959 | 202.118617 | 386.203410 | 193.605343 | 385.219394 | 193.113335 | 3 |
| 8 | 811.383225 | 406.195251 | 793.372660 | 397.189968 | V | 274.187366 | 137.597321 | 257.160817 | 129.084046 |            |            | 2 |
| 9 |            |            |            |            | R | 175.118952 | 88.063114  | 158.092403 | 79.549839  |            |            | 1 |

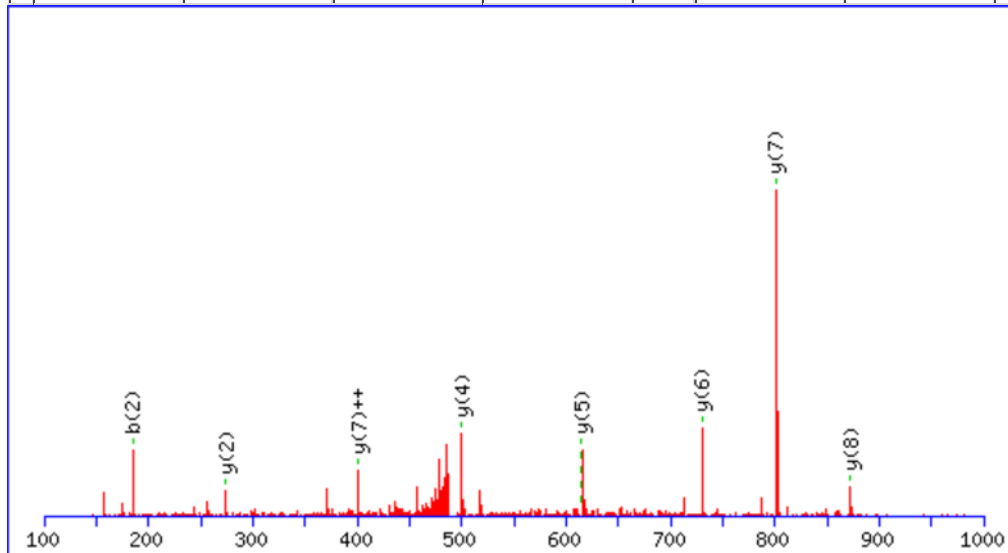

## Peptide View

MS/MS Fragmentation of **DFSLTSSSQTPGATK**

Found in **IP100291300**, Tax\_Id=9606 Gene\_Symbol=PODXL2 Putative uncharacterized protein PODXL2

**Experiment:** 41 - OPD-2 **Fraction:** OPD-2

Match to Query 10118: 1525.727048 from(763.870800,2+)

Title: OECHL100312\_30.10984.10984.2.dta

Data file \\Boromir\masse\Data LTQ-Orbitrap\Chrystelle Lacroix\Etude clinique sJPU\OECHL100312\_30.raw

**Monoisotopic mass of neutral peptide Mr(calc):** 1525.726028**Fixed modifications:** Carbamidomethyl (C) (apply to specified residues or termini only)**Ions Score:** 81  
**Expect:** 8.7e-007**Matches :** 46/150 fragment ions using 84 most intense peaks ([help](#))

| #  | b                  | b <sup>++</sup> | b*                 | b <sup>*++</sup>  | b <sup>0</sup>     | b <sup>0++</sup>  | Seq.     | y                  | y <sup>++</sup>   | y*                | y <sup>*++</sup>  | y <sup>0</sup>    | y <sup>0++</sup>  | #         |
|----|--------------------|-----------------|--------------------|-------------------|--------------------|-------------------|----------|--------------------|-------------------|-------------------|-------------------|-------------------|-------------------|-----------|
| 1  | 116.034219         | 58.520748       |                    |                   | 98.023654          | 49.515465         | <b>D</b> |                    |                   |                   |                   |                   |                   | <b>15</b> |
| 2  | <b>263.102633</b>  | 132.054954      |                    |                   | 245.092068         | 123.049672        | <b>F</b> | 1411.706351        | 706.356813        | 1394.679802       | 697.843539        | 1393.695786       | 697.351531        | <b>14</b> |
| 3  | <b>350.134661</b>  | 175.570968      |                    |                   | <b>332.124096</b>  | 166.565686        | <b>S</b> | <b>1264.637937</b> | <b>632.822607</b> | 1247.611388       | <b>624.309332</b> | 1246.627372       | <b>623.817324</b> | <b>13</b> |
| 4  | <b>463.218725</b>  | 232.113001      |                    |                   | <b>445.208160</b>  | 223.107718        | <b>L</b> | <b>1177.605909</b> | 589.306592        | 1160.579360       | 580.793318        | 1159.595344       | 580.301310        | <b>12</b> |
| 5  | <b>564.266404</b>  | 282.636840      |                    |                   | <b>546.255839</b>  | 273.631558        | <b>T</b> | <b>1064.521845</b> | 532.764561        | 1047.495296       | 524.251286        | 1046.511280       | 523.759278        | <b>11</b> |
| 6  | <b>651.298432</b>  | 326.152854      |                    |                   | <b>633.287867</b>  | 317.147572        | <b>S</b> | <b>963.474166</b>  | 482.240721        | 946.447617        | <b>473.727446</b> | 945.463601        | <b>473.235438</b> | <b>10</b> |
| 7  | <b>738.330460</b>  | 369.668868      |                    |                   | 720.319895         | 360.663586        | <b>S</b> | <b>876.442138</b>  | 438.724707        | <b>859.415589</b> | 430.211432        | 858.431573        | 429.719424        | <b>9</b>  |
| 8  | <b>825.362488</b>  | 413.184882      |                    |                   | 807.351923         | 404.179599        | <b>S</b> | <b>789.410110</b>  | <b>395.208693</b> | 772.383561        | 386.695418        | 771.399545        | 386.203410        | <b>8</b>  |
| 9  | <b>953.421066</b>  | 477.214171      | 936.394517         | <b>468.700897</b> | <b>935.410501</b>  | <b>468.208889</b> | <b>Q</b> | <b>702.378082</b>  | 351.692679        | 685.351533        | 343.179404        | 684.367517        | 342.687396        | <b>7</b>  |
| 10 | <b>1054.468745</b> | 527.738010      | <b>1037.442196</b> | 519.224736        | <b>1036.458180</b> | 518.732728        | <b>T</b> | <b>574.319504</b>  | 287.663390        | 557.292955        | 279.150115        | 556.308939        | 278.658107        | <b>6</b>  |
| 11 | <b>1151.521509</b> | 576.264392      | <b>1134.494960</b> | 567.751118        | 1133.510944        | 567.259110        | <b>P</b> | <b>473.271825</b>  | 237.139550        | 456.245276        | 228.626276        | <b>455.261260</b> | 228.134268        | <b>5</b>  |
| 12 | <b>1208.542973</b> | 604.775124      | 1191.516424        | 596.261850        | 1190.532408        | 595.769842        | <b>G</b> | <b>376.219061</b>  | 188.613168        | 359.192512        | 180.099894        | 358.208496        | 179.607886        | <b>4</b>  |
| 13 | <b>1279.580087</b> | 640.293681      | <b>1262.553538</b> | 631.780407        | <b>1261.569522</b> | 631.288399        | <b>A</b> | 319.197597         | 160.102436        | 302.171048        | 151.589162        | 301.187032        | 151.097154        | <b>3</b>  |
| 14 | <b>1380.627766</b> | 690.817521      | <b>1363.601217</b> | 682.304246        | <b>1362.617201</b> | 681.812238        | <b>T</b> | <b>248.160483</b>  | 124.583879        | 231.133934        | 116.070605        | 230.149918        | 115.578597        | <b>2</b>  |
| 15 |                    |                 |                    |                   |                    |                   | <b>K</b> | 147.112804         | 74.060040         | 130.086255        | 65.546765         |                   |                   | <b>1</b>  |

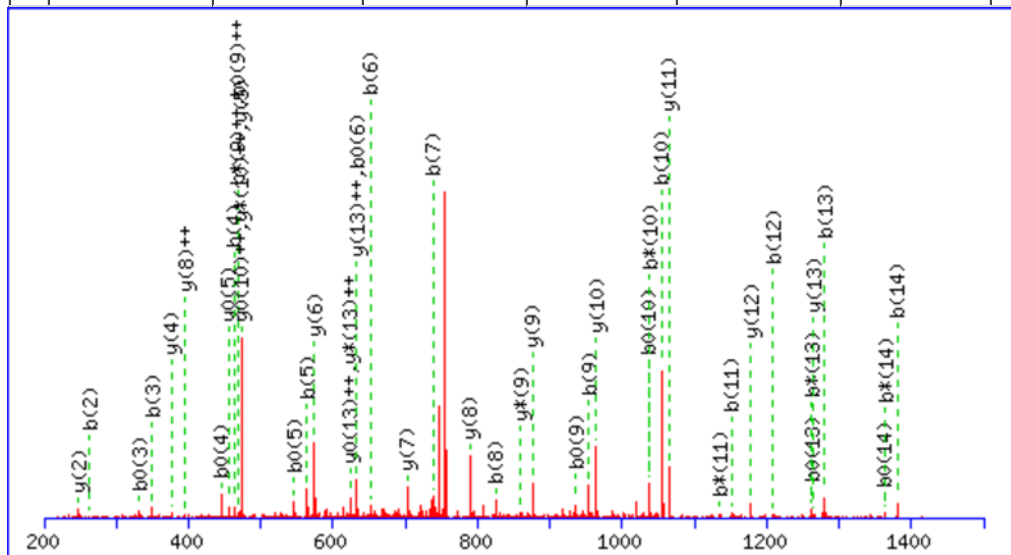

## Peptide View

MS/MS Fragmentation of **ASVGQDSPEPR**

Found in **IPI00044369**, Tax\_Id=9606 Gene\_Symbol=PLXDC2 Isoform 1 of Plexin domain-containing protein 2

**Experiment:** 41 - OPD-2 **Fraction:** OPD-2

Match to Query 5462: 1141.536048 from(571.775300,2+)

Title: OECHL100312\_30.3287.3287.2.dta

Data file \\Boromir\masse\Data LTQ-Orbitrap\Chrystelle Lacroix\Etude clinique sJPU\OECHL100312\_30.raw

**Monoisotopic mass of neutral peptide Mr(calc):** 1141.536362 **Fixed modifications:** Carbamidomethyl (C) (apply to specified residues or termini only) **Ions Score:** 64

**Expect:** 2.6e-005 **Matches :** 22/106 fragment ions using 30 most intense peaks ([help](#))

| #  | b          | b <sup>++</sup> | b*         | b <sup>*++</sup> | b <sup>0</sup> | b <sup>0++</sup> | Seq. | y           | y <sup>++</sup> | y*          | y <sup>*++</sup> | y <sup>0</sup> | y <sup>0++</sup> | #  |
|----|------------|-----------------|------------|------------------|----------------|------------------|------|-------------|-----------------|-------------|------------------|----------------|------------------|----|
| 1  | 72.044390  | 36.525833       |            |                  |                |                  | A    |             |                 |             |                  |                |                  | 11 |
| 2  | 159.076418 | 80.041847       |            |                  | 141.065853     | 71.036564        | S    | 1071.506528 | 536.256902      | 1054.479979 | 527.743628       | 1053.495963    | 527.251620       | 10 |
| 3  | 258.144832 | 129.576054      |            |                  | 240.134267     | 120.570772       | V    | 984.474500  | 492.740888      | 967.447951  | 484.227614       | 966.463935     | 483.735606       | 9  |
| 4  | 315.166296 | 158.086786      |            |                  | 297.155731     | 149.081504       | G    | 885.406086  | 443.206681      | 868.379537  | 434.693407       | 867.395521     | 434.201399       | 8  |
| 5  | 443.224874 | 222.116075      | 426.198325 | 213.602801       | 425.214309     | 213.110793       | Q    | 828.384622  | 414.695949      | 811.358073  | 406.182675       | 810.374057     | 405.690667       | 7  |
| 6  | 558.251817 | 279.629547      | 541.225268 | 271.116272       | 540.241252     | 270.624264       | D    | 700.326044  | 350.666660      | 683.299495  | 342.153386       | 682.315479     | 341.661378       | 6  |
| 7  | 645.283845 | 323.145561      | 628.257296 | 314.632286       | 627.273280     | 314.140278       | S    | 585.299101  | 293.153189      | 568.272552  | 284.639914       | 567.288536     | 284.147906       | 5  |
| 8  | 742.336609 | 371.671943      | 725.310060 | 363.158668       | 724.326044     | 362.666660       | P    | 498.267073  | 249.637174      | 481.240524  | 241.123900       | 480.256508     | 240.631892       | 4  |
| 9  | 871.379202 | 436.193239      | 854.352653 | 427.679965       | 853.368637     | 427.187957       | E    | 401.214309  | 201.110792      | 384.187760  | 192.597518       | 383.203744     | 192.105510       | 3  |
| 10 | 968.431966 | 484.719621      | 951.405417 | 476.206347       | 950.421401     | 475.714339       | P    | 272.171716  | 136.589496      | 255.145167  | 128.076221       |                |                  | 2  |
| 11 |            |                 |            |                  |                |                  | R    | 175.118952  | 88.063114       | 158.092403  | 79.549839        |                |                  | 1  |

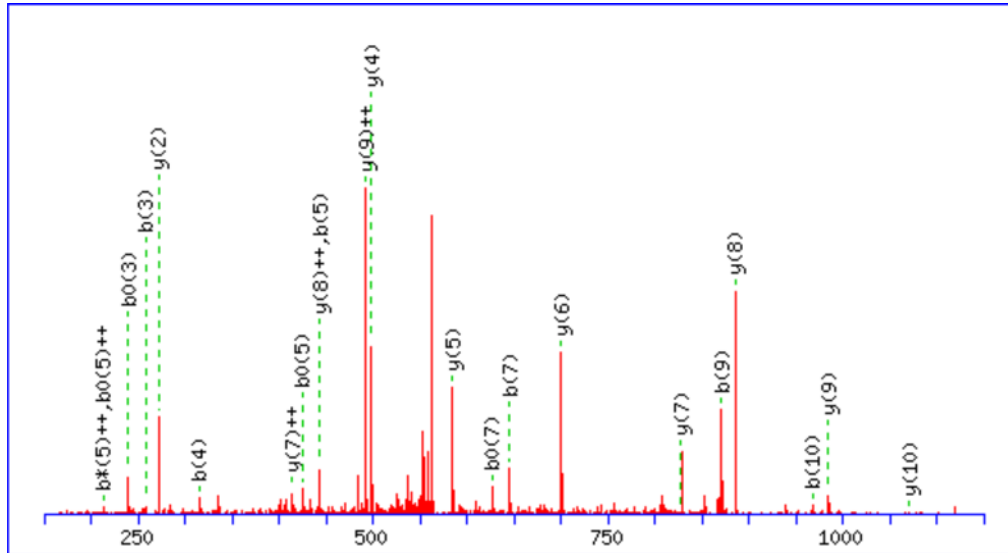

## Peptide View

### MS/MS Fragmentation of **AVGLLTVISK**

Found in **IPI00013446**, Tax\_Id=9606 Gene\_Symbol=PSCA Prostate stem cell antigen

**Experiment:** 41 - OPD-2 **Fraction:** OPD-2

Match to Query 3391: 999.635048 from(500.824800,2+)

Title: OECHL100312\_30.16809.16809.2.dta

Data file \\Boromir\masse\Data LTQ-Orbitrap\Chrystelle Lacroix\Etude clinique sJPU\OECHL100312\_30.raw

**Monoisotopic mass of neutral peptide Mr(calc):** 999.632828 **Fixed modifications:** Carbamidomethyl (C) (apply to specified residues or termini only) **Ions Score:** 57

**Expect:** 2.5e-005 **Matches :** 17/78 fragment ions using 33 most intense peaks ([help](#))

| # | b                 | b <sup>++</sup>   | b <sup>0</sup> | b <sup>0++</sup> | Seq. | y                 | y <sup>++</sup> | y <sup>*</sup> | y <sup>*++</sup> | y <sup>0</sup> | y <sup>0++</sup> | #  |
|---|-------------------|-------------------|----------------|------------------|------|-------------------|-----------------|----------------|------------------|----------------|------------------|----|
| 1 | 72.044390         | 36.525833         |                |                  | A    |                   |                 |                |                  |                |                  | 10 |
| 2 | <b>171.112804</b> | 86.060040         |                |                  | V    | 929.602995        | 465.305136      | 912.576446     | 456.791861       | 911.592430     | 456.299853       | 9  |
| 3 | <b>228.134268</b> | 114.570772        |                |                  | G    | <b>830.534581</b> | 415.770929      | 813.508032     | 407.257654       | 812.524016     | 406.765646       | 8  |
| 4 | <b>341.218332</b> | <b>171.112804</b> |                |                  | L    | <b>773.513117</b> | 387.260197      | 756.486568     | 378.746922       | 755.502552     | 378.254914       | 7  |
| 5 | <b>454.302396</b> | 227.654836        |                |                  | L    | <b>660.429053</b> | 330.718165      | 643.402504     | 322.204890       | 642.418488     | 321.712882       | 6  |
| 6 | <b>555.350075</b> | 278.178676        | 537.339510     | 269.173393       | T    | <b>547.344989</b> | 274.176133      | 530.318440     | 265.662858       | 529.334424     | 265.170850       | 5  |

|    |            |            |            |            |   |            |            |            |            |            |            |   |
|----|------------|------------|------------|------------|---|------------|------------|------------|------------|------------|------------|---|
| 7  | 654.418489 | 327.712883 | 636.407924 | 318.707600 | V | 446.297310 | 223.652293 | 429.270761 | 215.139018 | 428.286745 | 214.647010 | 4 |
| 8  | 767.502553 | 384.254915 | 749.491988 | 375.249632 | I | 347.228896 | 174.118086 | 330.202347 | 165.604811 | 329.218331 | 165.112803 | 3 |
| 9  | 854.534581 | 427.770929 | 836.524016 | 418.765646 | S | 234.144832 | 117.576054 | 217.118283 | 109.062779 | 216.134267 | 108.570771 | 2 |
| 10 |            |            |            |            | K | 147.112804 | 74.060040  | 130.086255 | 65.546765  |            |            | 1 |

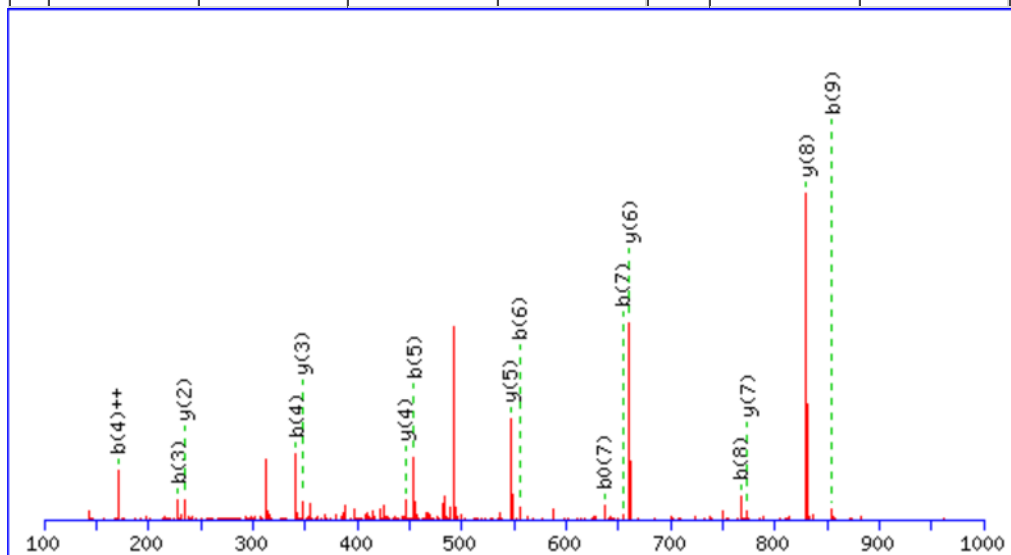

## Peptide View

MS/MS Fragmentation of **LLIYDASNLETGVPSR**

Found in **IP100003111**, Tax\_Id=9606 Gene\_Symbol=LOC652694 Ig kappa chain V-I region AU

**Experiment:** 41 - OPD-2 **Fraction:** OPD-2

Match to Query 11928: 1746.917648 from(874.466100,2+)

Title: OECHL100312\_30.16592.16592.2.dta

Data file \\Boromir\masse\Data LTQ-Orbitrap\Chrystelle Lacroix\Etude clinique sJPU\OECHL100312\_30.raw

**Monoisotopic mass of neutral peptide Mr(calc):** 1746.915192 **Fixed modifications:** Carbamidomethyl (C) (apply to specified residues or termini only) **Ions Score:** 73

**Expect:** 5e-006 **Matches :** 39/156 fragment ions using 85 most intense peaks ([help](#))

| # | b          | b <sup>++</sup> | b <sup>*</sup> | b <sup>+++</sup> | b <sup>0</sup> | b <sup>0++</sup> | Seq. | y           | y <sup>++</sup> | y <sup>*</sup> | y <sup>+++</sup> | y <sup>0</sup> | y <sup>0++</sup> | #  |
|---|------------|-----------------|----------------|------------------|----------------|------------------|------|-------------|-----------------|----------------|------------------|----------------|------------------|----|
| 1 | 114.091340 | 57.549308       |                |                  |                |                  | L    |             |                 |                |                  |                |                  | 16 |
| 2 | 227.175404 | 114.091340      |                |                  |                |                  | L    | 1634.838427 | 817.922852      | 1617.811878    | 809.409577       | 1616.827862    | 808.917569       | 15 |



|    |                    |                   |                    |                   |                    |                   |  |          |                    |                   |                   |            |                    |                   |           |
|----|--------------------|-------------------|--------------------|-------------------|--------------------|-------------------|--|----------|--------------------|-------------------|-------------------|------------|--------------------|-------------------|-----------|
| 3  | <b>340.259468</b>  | 170.633372        |                    |                   |                    |                   |  | <b>I</b> | <b>1521.754363</b> | 761.380820        | 1504.727814       | 752.867545 | 1503.743798        | 752.375537        | <b>14</b> |
| 4  | <b>503.322797</b>  | 252.165036        |                    |                   |                    |                   |  | <b>Y</b> | <b>1408.670299</b> | <b>704.838788</b> | 1391.643750       | 696.325513 | <b>1390.659734</b> | 695.833505        | <b>13</b> |
| 5  | <b>618.349740</b>  | 309.678508        |                    |                   | 600.339175         | 300.673226        |  | <b>D</b> | <b>1245.606970</b> | 623.307123        | 1228.580421       | 614.793849 | 1227.596405        | <b>614.301841</b> | <b>12</b> |
| 6  | <b>689.386854</b>  | 345.197065        |                    |                   | 671.376289         | 336.191782        |  | <b>A</b> | <b>1130.580027</b> | 565.793652        | 1113.553478       | 557.280377 | 1112.569462        | 556.788369        | <b>11</b> |
| 7  | <b>776.418882</b>  | 388.713079        |                    |                   | 758.408317         | 379.707796        |  | <b>S</b> | <b>1059.542913</b> | 530.275095        | 1042.516364       | 521.761820 | 1041.532348        | 521.269812        | <b>10</b> |
| 8  | 890.461809         | 445.734542        | <b>873.435260</b>  | 437.221268        | 872.451244         | 436.729260        |  | <b>N</b> | <b>972.510885</b>  | 486.759081        | 955.484336        | 478.245806 | 954.500320         | 477.753798        | <b>9</b>  |
| 9  | <b>1003.545873</b> | 502.276574        | 986.519324         | 493.763300        | 985.535308         | 493.271292        |  | <b>L</b> | <b>858.467958</b>  | 429.737617        | 841.441409        | 421.224343 | 840.457393         | 420.732335        | <b>8</b>  |
| 10 | <b>1132.588466</b> | <b>566.797871</b> | 1115.561917        | 558.284597        | 1114.577901        | 557.792588        |  | <b>E</b> | <b>745.383894</b>  | 373.195585        | 728.357345        | 364.682311 | <b>727.373329</b>  | 364.190303        | <b>7</b>  |
| 11 | <b>1233.636145</b> | <b>617.321710</b> | 1216.609596        | 608.808436        | 1215.625580        | 608.316428        |  | <b>T</b> | <b>616.341301</b>  | 308.674289        | 599.314752        | 300.161014 | 598.330736         | 299.669006        | <b>6</b>  |
| 12 | <b>1290.657609</b> | 645.832442        | 1273.631060        | <b>637.319168</b> | <b>1272.647044</b> | <b>636.827160</b> |  | <b>G</b> | <b>515.293622</b>  | 258.150449        | 498.267073        | 249.637175 | 497.283057         | 249.145167        | <b>5</b>  |
| 13 | <b>1389.726023</b> | 695.366649        | <b>1372.699474</b> | 686.853375        | <b>1371.715458</b> | 686.361367        |  | <b>V</b> | <b>458.272158</b>  | 229.639717        | 441.245609        | 221.126443 | 440.261593         | 220.634435        | <b>4</b>  |
| 14 | 1486.778787        | 743.893032        | 1469.752238        | 735.379757        | 1468.768222        | 734.887749        |  | <b>P</b> | <b>359.203744</b>  | 180.105510        | <b>342.177195</b> | 171.592236 | <b>341.193179</b>  | 171.100228        | <b>3</b>  |
| 15 | <b>1573.810815</b> | 787.409046        | <b>1556.784266</b> | 778.895771        | 1555.800250        | 778.403763        |  | <b>S</b> | <b>262.150980</b>  | 131.579128        | 245.124431        | 123.065854 | 244.140415         | 122.573846        | <b>2</b>  |
| 16 |                    |                   |                    |                   |                    |                   |  | <b>R</b> | 175.118952         | 88.063114         | 158.092403        | 79.549839  |                    |                   | <b>1</b>  |

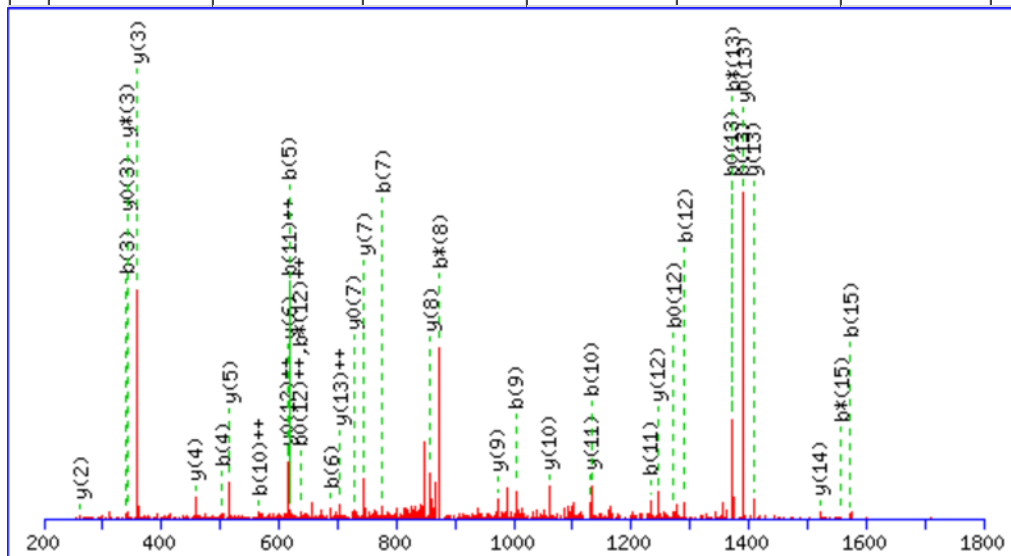

## Peptide View

MS/MS Fragmentation of **CQCPAGAALQADGR**Found in **IPI00010737**, Tax\_Id=9606 Gene\_Symbol=THBD Thrombomodulin**Experiment:** 41 - OPD-2 **Fraction:** OPD-2

Match to Query 9619: 1473.646248 from(737.830400,2+)

Title: OECHL100312\_30.7758.7758.2.dta

Data file \\Boromir\masse\Data LTQ-Orbitrap\Chrystelle Lacroix\Etude clinique sJPU\OECHL100312\_30.raw

**Monoisotopic mass of neutral peptide Mr(calc):** 1473.645279**Fixed modifications:** Carbamidomethyl (C) (apply to specified residues or termini only)**Ions Score:** 69**Expect:** 6.4e-006**Matches :** 24/128 fragment ions using 38 most intense peaks ([help](#))

| #  | b                  | b <sup>++</sup> | b <sup>*</sup>    | b <sup>*++</sup> | b <sup>0</sup> | b <sup>0++</sup> | Seq. | y                  | y <sup>++</sup>   | y <sup>*</sup>    | y <sup>*++</sup> | y <sup>0</sup> | y <sup>0++</sup> | #  |
|----|--------------------|-----------------|-------------------|------------------|----------------|------------------|------|--------------------|-------------------|-------------------|------------------|----------------|------------------|----|
| 1  | 161.037925         | 81.022600       |                   |                  |                |                  | C    |                    |                   |                   |                  |                |                  | 14 |
| 2  | <b>289.096503</b>  | 145.051890      | 272.069954        | 136.538615       |                |                  | Q    | 1314.621912        | 657.814594        | 1297.595363       | 649.301320       | 1296.611347    | 648.809312       | 13 |
| 3  | <b>449.127152</b>  | 225.067214      | 432.100603        | 216.553940       |                |                  | C    | <b>1186.563334</b> | <b>593.785305</b> | 1169.536785       | 585.272031       | 1168.552769    | 584.780023       | 12 |
| 4  | <b>546.179916</b>  | 273.593596      | 529.153367        | 265.080322       |                |                  | P    | <b>1026.532685</b> | 513.769981        | 1009.506136       | 505.256706       | 1008.522120    | 504.764698       | 11 |
| 5  | <b>617.217030</b>  | 309.112153      | <b>600.190481</b> | 300.598879       |                |                  | A    | <b>929.479921</b>  | 465.243599        | <b>912.453372</b> | 456.730324       | 911.469356     | 456.238316       | 10 |
| 6  | 674.238494         | 337.622885      | 657.211945        | 329.109611       |                |                  | G    | <b>858.442807</b>  | 429.725042        | 841.416258        | 421.211767       | 840.432242     | 420.719759       | 9  |
| 7  | 745.275608         | 373.141442      | <b>728.249059</b> | 364.628168       |                |                  | A    | 801.421343         | 401.214310        | 784.394794        | 392.701035       | 783.410778     | 392.209027       | 8  |
| 8  | <b>816.312722</b>  | 408.659999      | 799.286173        | 400.146725       |                |                  | A    | 730.384229         | 365.695753        | 713.357680        | 357.182478       | 712.373664     | 356.690470       | 7  |
| 9  | <b>929.396786</b>  | 465.202031      | <b>912.370237</b> | 456.688757       |                |                  | L    | <b>659.347115</b>  | 330.177196        | 642.320566        | 321.663921       | 641.336550     | 321.171913       | 6  |
| 10 | <b>1057.455364</b> | 529.231320      | 1040.428815       | 520.718046       |                |                  | Q    | <b>546.263051</b>  | 273.635164        | 529.236502        | 265.121889       | 528.252486     | 264.629881       | 5  |
| 11 | <b>1128.492478</b> | 564.749877      | 1111.465929       | 556.236603       |                |                  | A    | <b>418.204473</b>  | 209.605874        | 401.177924        | 201.092600       | 400.193908     | 200.600592       | 4  |
| 12 | <b>1243.519421</b> | 622.263349      | 1226.492872       | 613.750074       | 1225.508856    | 613.258066       | D    | <b>347.167359</b>  | 174.087317        | 330.140810        | 165.574043       | 329.156794     | 165.082035       | 3  |
| 13 | <b>1300.540885</b> | 650.774081      | 1283.514336       | 642.260806       | 1282.530320    | 641.768798       | G    | <b>232.140416</b>  | 116.573846        | 215.113867        | 108.060571       |                |                  | 2  |
| 14 |                    |                 |                   |                  |                |                  | R    | 175.118952         | 88.063114         | 158.092403        | 79.549839        |                |                  | 1  |

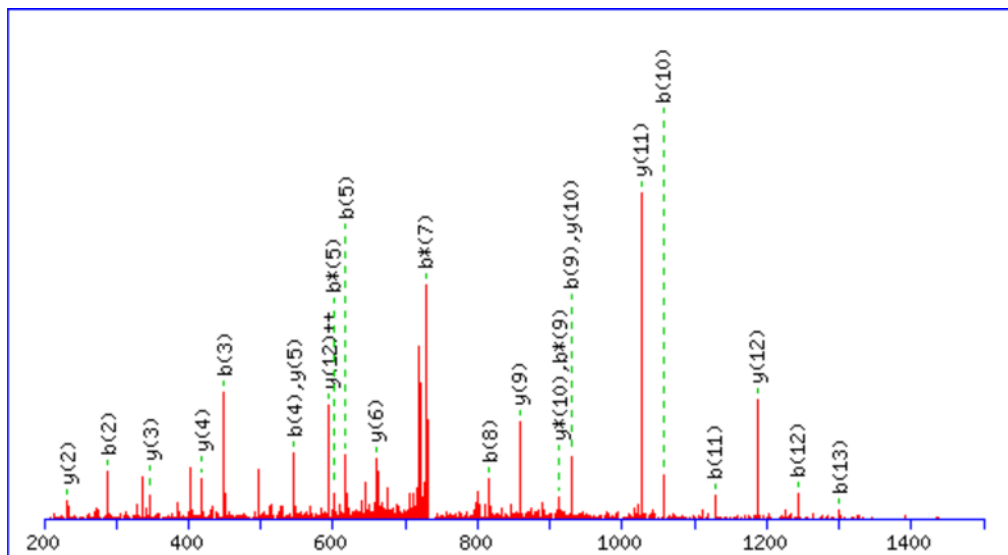

## Peptide View

MS/MS Fragmentation of **VTATGFQQCSLIDGR**

Found in **IPI00333140**, Tax\_Id=9606 Gene\_Symbol=DNER Delta and Notch-like epidermal growth factor-related receptor

**Experiment:** 41 - OPD-2 **Fraction:** OPD-2

Match to Query 11182: 1651.798848 from(826.906700,2+)

Title: OECHL100312\_30.13821.13821.2.dta

Data file \\Boromir\masse\Data LTQ-Orbitrap\Chrystelle Lacroix\Etude clinique sJPU\OECHL100312\_30.raw

**Monoisotopic mass of neutral peptide Mr(calc):** 1651.798828 **Fixed modifications:** Carbamidomethyl (C) (apply to specified residues or termini only) **Ions Score:** 80

**Expect:** 1.6e-006 **Matches :** 30/150 fragment ions using 55 most intense peaks ([help](#))

| # | b                 | b <sup>++</sup> | b* | b <sup>*++</sup> | b <sup>0</sup>    | b <sup>0++</sup> | Seq. | y                  | y <sup>++</sup>   | y*          | y <sup>*++</sup> | y <sup>0</sup> | y <sup>0++</sup> | #  |
|---|-------------------|-----------------|----|------------------|-------------------|------------------|------|--------------------|-------------------|-------------|------------------|----------------|------------------|----|
| 1 | 100.075690        | 50.541483       |    |                  |                   |                  | V    |                    |                   |             |                  |                |                  | 15 |
| 2 | 201.123369        | 101.065322      |    |                  | 183.112804        | 92.060040        | T    | 1553.737670        | 777.372473        | 1536.711121 | 768.859198       | 1535.727105    | 768.367190       | 14 |
| 3 | <b>272.160483</b> | 136.583879      |    |                  | 254.149918        | 127.578597       | A    | <b>1452.689991</b> | <b>726.848633</b> | 1435.663442 | 718.335359       | 1434.679426    | 717.843351       | 13 |
| 4 | <b>373.208162</b> | 187.107719      |    |                  | 355.197597        | 178.102437       | T    | <b>1381.652877</b> | <b>691.330076</b> | 1364.626328 | 682.816802       | 1363.642312    | 682.324794       | 12 |
| 5 | <b>430.229626</b> | 215.618451      |    |                  | 412.219061        | 206.613169       | G    | <b>1280.605198</b> | 640.806237        | 1263.578649 | 632.292962       | 1262.594633    | 631.800954       | 11 |
| 6 | <b>577.298040</b> | 289.152658      |    |                  | <b>559.287475</b> | 280.147376       | F    | <b>1223.583734</b> | 612.295505        | 1206.557185 | 603.782230       | 1205.573169    | 603.290222       | 10 |

|    |             |            |             |            |             |            |   |             |            |             |            |             |            |   |
|----|-------------|------------|-------------|------------|-------------|------------|---|-------------|------------|-------------|------------|-------------|------------|---|
| 7  | 705.356618  | 353.181947 | 688.330069  | 344.668673 | 687.346053  | 344.176665 | Q | 1076.515320 | 538.761298 | 1059.488771 | 530.248023 | 1058.504755 | 529.756015 | 9 |
| 8  | 833.415196  | 417.211236 | 816.388647  | 408.697962 | 815.404631  | 408.205954 | Q | 948.456742  | 474.732009 | 931.430193  | 466.218734 | 930.446177  | 465.726726 | 8 |
| 9  | 993.445845  | 497.226561 | 976.419296  | 488.713286 | 975.435280  | 488.221278 | C | 820.398164  | 410.702720 | 803.371615  | 402.189445 | 802.387599  | 401.697437 | 7 |
| 10 | 1080.477873 | 540.742575 | 1063.451324 | 532.229300 | 1062.467308 | 531.737292 | S | 660.367515  | 330.687395 | 643.340966  | 322.174121 | 642.356950  | 321.682113 | 6 |
| 11 | 1193.561937 | 597.284607 | 1176.535388 | 588.771332 | 1175.551372 | 588.279324 | L | 573.335487  | 287.171381 | 556.308938  | 278.658107 | 555.324922  | 278.166099 | 5 |
| 12 | 1306.646001 | 653.826638 | 1289.619452 | 645.313364 | 1288.635436 | 644.821356 | I | 460.251423  | 230.629349 | 443.224874  | 222.116075 | 442.240858  | 221.624067 | 4 |
| 13 | 1421.672944 | 711.340110 | 1404.646395 | 702.826836 | 1403.662379 | 702.334827 | D | 347.167359  | 174.087317 | 330.140810  | 165.574043 | 329.156794  | 165.082035 | 3 |
| 14 | 1478.694408 | 739.850842 | 1461.667859 | 731.337567 | 1460.683843 | 730.845559 | G | 232.140416  | 116.573846 | 215.113867  | 108.060571 |             |            | 2 |
| 15 |             |            |             |            |             |            | R | 175.118952  | 88.063114  | 158.092403  | 79.549839  |             |            | 1 |

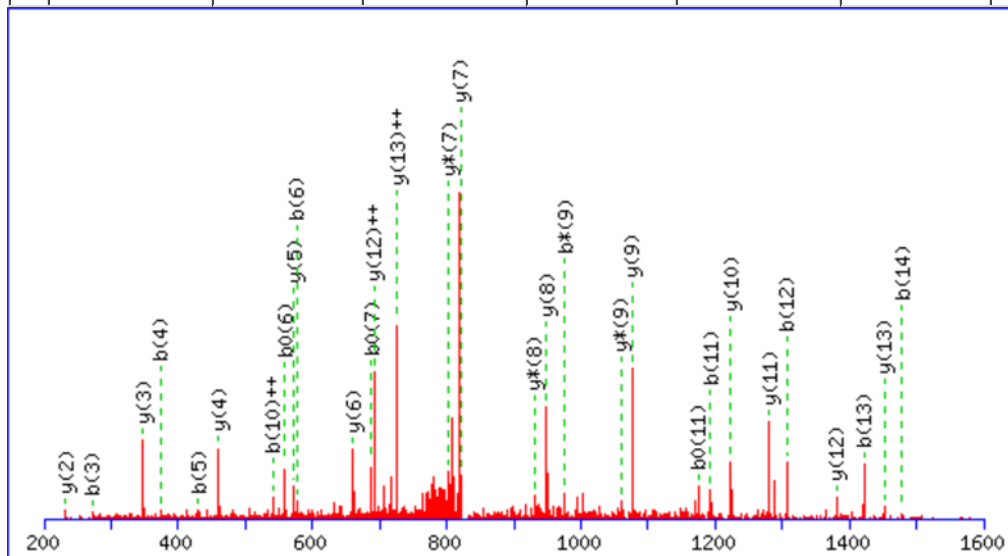

## Peptide View

MS/MS Fragmentation of **KAGPCEQAGSPCR**

Found in **IPI00028381**, Tax\_Id=9606 Gene\_Symbol=DLK2 Isoform 1 of Protein delta homolog 2

**Experiment:** 41 - OPD-2 **Fraction:** OPD-2

Match to Query 9065: 1416.624648 from(709.319600,2+)

Title: OECHL100312\_30.2218.2218.2.dta

Data file \\Boromir\masse\Data LTQ-Orbitrap\Chrystelle Lacroix\Etude clinique sJPU\OECHL100312\_30.raw

**Monoisotopic mass of neutral peptide Mr(calc):** 1416.623810**Fixed modifications:** Carbamidomethyl (C) (apply to specified residues or termini only)**Ions Score:** 66

**Expect:** 1.5e-005**Matches :** 18/128 fragment ions using 37 most intense peaks ([help](#))

| #  | b                 | b <sup>++</sup> | b*                | b <sup>*++</sup> | b <sup>0</sup>     | b <sup>0++</sup> | Seq.     | y                  | y <sup>++</sup>   | y*          | y <sup>*++</sup>  | y <sup>0</sup> | y <sup>0++</sup>  | #         |
|----|-------------------|-----------------|-------------------|------------------|--------------------|------------------|----------|--------------------|-------------------|-------------|-------------------|----------------|-------------------|-----------|
| 1  | 129.102239        | 65.054757       | 112.075690        | 56.541483        |                    |                  | <b>K</b> |                    |                   |             |                   |                |                   | <b>13</b> |
| 2  | 200.139353        | 100.573315      | 183.112804        | 92.060040        |                    |                  | <b>A</b> | <b>1289.536133</b> | <b>645.271705</b> | 1272.509584 | 636.758430        | 1271.525568    | 636.266422        | <b>12</b> |
| 3  | 257.160817        | 129.084047      | 240.134268        | 120.570772       |                    |                  | <b>G</b> | <b>1218.499019</b> | 609.753148        | 1201.472470 | 601.239873        | 1200.488454    | 600.747865        | <b>11</b> |
| 4  | 354.213581        | 177.610429      | 337.187032        | 169.097154       |                    |                  | <b>P</b> | <b>1161.477555</b> | <b>581.242416</b> | 1144.451006 | 572.729141        | 1143.466990    | 572.237133        | <b>10</b> |
| 5  | 514.244230        | 257.625753      | 497.217681        | 249.112479       |                    |                  | <b>C</b> | <b>1064.424791</b> | 532.716034        | 1047.398242 | 524.202759        | 1046.414226    | 523.710751        | <b>9</b>  |
| 6  | 643.286823        | 322.147050      | 626.260274        | 313.633775       | 625.276258         | 313.141767       | <b>E</b> | <b>904.394142</b>  | 452.700709        | 887.367593  | 444.187434        | 886.383577     | 443.695427        | <b>8</b>  |
| 7  | 771.345401        | 386.176339      | 754.318852        | 377.663064       | 753.334836         | 377.171056       | <b>Q</b> | <b>775.351549</b>  | 388.179413        | 758.325000  | 379.666138        | 757.340984     | 379.174130        | <b>7</b>  |
| 8  | <b>842.382515</b> | 421.694896      | 825.355966        | 413.181621       | 824.371950         | 412.689613       | <b>A</b> | 647.292971         | 324.150124        | 630.266422  | <b>315.636849</b> | 629.282406     | <b>315.144841</b> | <b>6</b>  |
| 9  | 899.403979        | 450.205628      | 882.377430        | 441.692353       | 881.393414         | 441.200345       | <b>G</b> | <b>576.255857</b>  | 288.631567        | 559.229308  | 280.118292        | 558.245292     | 279.626284        | <b>5</b>  |
| 10 | <b>986.436007</b> | 493.721642      | <b>969.409458</b> | 485.208367       | 968.425442         | 484.716359       | <b>S</b> | <b>519.234393</b>  | 260.120835        | 502.207844  | 251.607560        | 501.223828     | 251.115552        | <b>4</b>  |
| 11 | 1083.488771       | 542.248024      | 1066.462222       | 533.734749       | <b>1065.478206</b> | 533.242741       | <b>P</b> | <b>432.202365</b>  | 216.604820        | 415.175816  | 208.091546        |                |                   | <b>3</b>  |
| 12 | 1243.519420       | 622.263348      | 1226.492871       | 613.750074       | 1225.508855        | 613.258066       | <b>C</b> | <b>335.149601</b>  | 168.078438        | 318.123052  | 159.565164        |                |                   | <b>2</b>  |
| 13 |                   |                 |                   |                  |                    |                  | <b>R</b> | 175.118952         | 88.063114         | 158.092403  | 79.549839         |                |                   | <b>1</b>  |

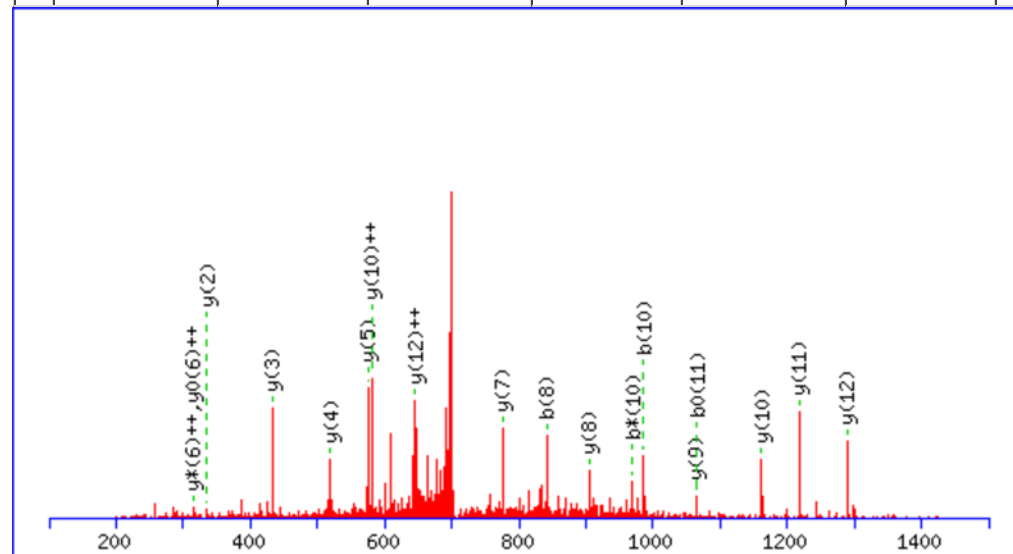

## Peptide View

MS/MS Fragmentation of **ACNPQPNGENAI SAR**

Found in **IPI00169285**, Tax\_Id=9606 Gene\_Symbol=PLBD2 Putative phospholipase B-like 2

**Experiment:** 41 - OPD-2 **Fraction:** OPD-2

Match to Query 10750: 1597.727848 from(799.871200,2+)

Title: OECHL100312\_30.5854.5854.2.dta

Data file \\Boromir\masse\Data LTQ-Orbitrap\Chrystelle Lacroix\Etude clinique sJPU\OECHL100312\_30.raw

**Monoisotopic mass of neutral peptide Mr(calc):** 1597.726669 **Fixed modifications:** Carbamidomethyl (C) (apply to specified residues or termini only) **Ions Score:** 64

**Expect:** 3.2e-005 **Matches :** 32/144 fragment ions using 68 most intense peaks ([help](#))

| #  | b                  | b <sup>++</sup> | b <sup>*</sup>     | b <sup>*++</sup> | b <sup>0</sup>     | b <sup>0++</sup> | Seq. | y                  | y <sup>++</sup>   | y <sup>*</sup>     | y <sup>*++</sup>  | y <sup>0</sup> | y <sup>0++</sup>  | #  |
|----|--------------------|-----------------|--------------------|------------------|--------------------|------------------|------|--------------------|-------------------|--------------------|-------------------|----------------|-------------------|----|
| 1  | 72.044390          | 36.525833       |                    |                  |                    |                  | A    |                    |                   |                    |                   |                |                   | 15 |
| 2  | <b>232.075039</b>  | 116.541158      |                    |                  |                    |                  | C    | 1527.696865        | 764.352071        | 1510.670316        | 755.838796        | 1509.686300    | 755.346788        | 14 |
| 3  | <b>346.117966</b>  | 173.562621      | 329.091417         | 165.049347       |                    |                  | N    | <b>1367.666216</b> | <b>684.336746</b> | 1350.639667        | <b>675.823472</b> | 1349.655651    | <b>675.331464</b> | 13 |
| 4  | <b>443.170730</b>  | 222.089003      | 426.144181         | 213.575729       |                    |                  | P    | <b>1253.623289</b> | <b>627.315283</b> | 1236.596740        | 618.802008        | 1235.612724    | 618.310000        | 12 |
| 5  | <b>571.229308</b>  | 286.118292      | <b>554.202759</b>  | 277.605018       |                    |                  | Q    | <b>1156.570525</b> | <b>578.788901</b> | 1139.543976        | 570.275626        | 1138.559960    | 569.783618        | 11 |
| 6  | 668.282072         | 334.644674      | 651.255523         | 326.131400       |                    |                  | P    | <b>1028.511947</b> | <b>514.759612</b> | <b>1011.485398</b> | 506.246337        | 1010.501382    | 505.754329        | 10 |
| 7  | <b>782.324999</b>  | 391.666138      | 765.298450         | 383.152863       |                    |                  | N    | <b>931.459183</b>  | 466.233230        | <b>914.432634</b>  | 457.719955        | 913.448618     | 457.227947        | 9  |
| 8  | <b>839.346463</b>  | 420.176870      | 822.319914         | 411.663595       |                    |                  | G    | <b>817.416256</b>  | 409.211766        | 800.389707         | 400.698492        | 799.405691     | 400.206484        | 8  |
| 9  | <b>968.389056</b>  | 484.698166      | 951.362507         | 476.184892       | 950.378491         | 475.692884       | E    | 760.394792         | 380.701034        | 743.368243         | 372.187760        | 742.384227     | 371.695752        | 7  |
| 10 | 1082.431983        | 541.719630      | 1065.405434        | 533.206355       | 1064.421418        | 532.714347       | N    | 631.352199         | 316.179738        | 614.325650         | 307.666463        | 613.341634     | 307.174455        | 6  |
| 11 | <b>1153.469097</b> | 577.238187      | 1136.442548        | 568.724912       | 1135.458532        | 568.232904       | A    | <b>517.309272</b>  | 259.158274        | 500.282723         | 250.644999        | 499.298707     | 250.152991        | 5  |
| 12 | <b>1266.553161</b> | 633.780219      | <b>1249.526612</b> | 625.266944       | 1248.542596        | 624.774936       | I    | <b>446.272158</b>  | 223.639717        | 429.245609         | 215.126442        | 428.261593     | 214.634434        | 4  |
| 13 | <b>1353.585189</b> | 677.296233      | 1336.558640        | 668.782958       | 1335.574624        | 668.290950       | S    | <b>333.188094</b>  | 167.097685        | 316.161545         | 158.584410        | 315.177529     | 158.092402        | 3  |
| 14 | <b>1424.622303</b> | 712.814790      | 1407.595754        | 704.301515       | <b>1406.611738</b> | 703.809507       | A    | <b>246.156066</b>  | 123.581671        | 229.129517         | 115.068396        |                |                   | 2  |
| 15 |                    |                 |                    |                  |                    |                  | R    | 175.118952         | 88.063114         | 158.092403         | 79.549839         |                |                   | 1  |

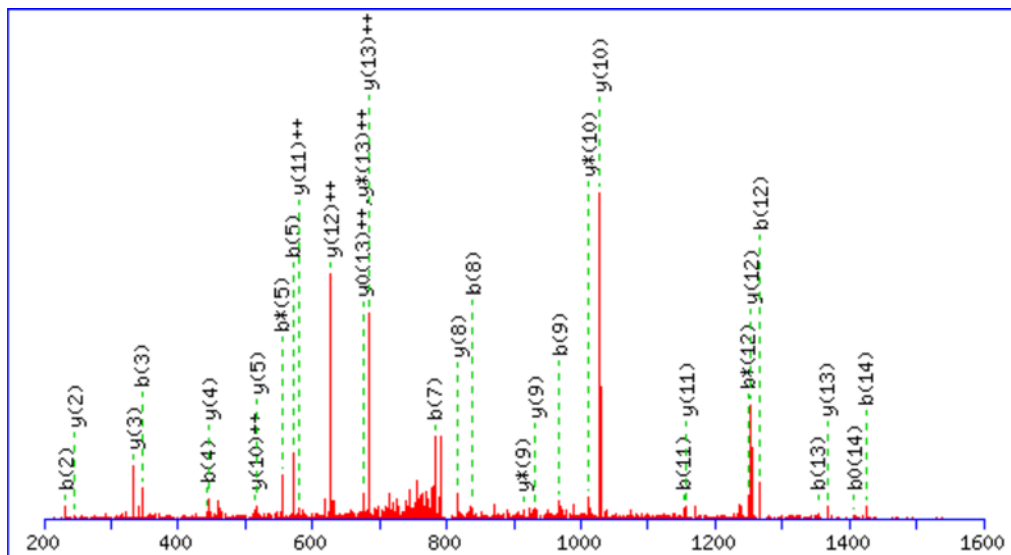

## Peptide View

MS/MS Fragmentation of **NIETIINTFHQYSVK**

Found in **IPI00027462**, Tax\_Id=9606 Gene\_Symbol=S100A9 Protein S100-A9

**Experiment:** 41 - OPD-2 **Fraction:** OPD-2

Match to Query 12342: 1805.932048 from(903.973300,2+)

Title: OECHL100312\_30.18507.18507.2.dta

Data file \\Boromir\masse\Data LTQ-Orbitrap\Chrystelle Lacroix\Etude clinique sJPU\OECHL100312\_30.raw

**Monoisotopic mass of neutral peptide Mr(calc):** 1805.931183 **Fixed modifications:** Carbamidomethyl (C) (apply to specified residues or termini only) **Ions Score:** 64

**Expect:** 5e-005 **Matches :** 24/160 fragment ions using 29 most intense peaks ([help](#))

| # | b                 | b <sup>++</sup> | b <sup>*</sup>    | b <sup>*++</sup> | b <sup>0</sup>    | b <sup>0++</sup> | Seq. | y                  | y <sup>++</sup>   | y <sup>*</sup> | y <sup>*++</sup> | y <sup>0</sup>     | y <sup>0++</sup>  | #  |
|---|-------------------|-----------------|-------------------|------------------|-------------------|------------------|------|--------------------|-------------------|----------------|------------------|--------------------|-------------------|----|
| 1 | 115.050203        | 58.028740       | 98.023654         | 49.515465        |                   |                  | N    |                    |                   |                |                  |                    |                   | 15 |
| 2 | 228.134267        | 114.570771      | 211.107718        | 106.057497       |                   |                  | I    | 1692.895549        | 846.951413        | 1675.869000    | 838.438138       | 1674.884984        | 837.946130        | 14 |
| 3 | <b>357.176860</b> | 179.092068      | 340.150311        | 170.578793       | 339.166295        | 170.086785       | E    | <b>1579.811485</b> | <b>790.409381</b> | 1562.784936    | 781.896106       | <b>1561.800920</b> | <b>781.404098</b> | 13 |
| 4 | <b>458.224539</b> | 229.615907      | 441.197990        | 221.102633       | <b>440.213974</b> | 220.610625       | T    | <b>1450.768892</b> | <b>725.888084</b> | 1433.742343    | 717.374810       | 1432.758327        | 716.882802        | 12 |
| 5 | <b>571.308603</b> | 286.157940      | <b>554.282054</b> | 277.644665       | <b>553.298038</b> | 277.152657       | I    | <b>1349.721213</b> | 675.364245        | 1332.694664    | 666.850970       | 1331.710648        | 666.358962        | 11 |
| 6 | 684.392667        | 342.699972      | 667.366118        | 334.186697       | 666.382102        | 333.694689       | I    | <b>1236.637149</b> | 618.822213        | 1219.610600    | 610.308938       | 1218.626584        | 609.816930        | 10 |

|    |             |            |             |            |             |            |   |             |            |             |            |             |            |   |
|----|-------------|------------|-------------|------------|-------------|------------|---|-------------|------------|-------------|------------|-------------|------------|---|
| 7  | 798.435594  | 399.721435 | 781.409045  | 391.208161 | 780.425029  | 390.716153 | N | 1123.553085 | 562.280181 | 1106.526536 | 553.766906 | 1105.542520 | 553.274898 | 9 |
| 8  | 899.483273  | 450.245275 | 882.456724  | 441.732000 | 881.472708  | 441.239992 | T | 1009.510158 | 505.258717 | 992.483609  | 496.745443 | 991.499593  | 496.253435 | 8 |
| 9  | 1046.551687 | 523.779482 | 1029.525138 | 515.266207 | 1028.541122 | 514.774199 | F | 908.462479  | 454.734878 | 891.435930  | 446.221603 | 890.451914  | 445.729595 | 7 |
| 10 | 1183.610599 | 592.308938 | 1166.584050 | 583.795663 | 1165.600034 | 583.303655 | H | 761.394065  | 381.200671 | 744.367516  | 372.687396 | 743.383500  | 372.195388 | 6 |
| 11 | 1311.669177 | 656.338227 | 1294.642628 | 647.824952 | 1293.658612 | 647.332944 | Q | 624.335153  | 312.671215 | 607.308604  | 304.157940 | 606.324588  | 303.665932 | 5 |
| 12 | 1474.732506 | 737.869891 | 1457.705957 | 729.356617 | 1456.721941 | 728.864609 | Y | 496.276575  | 248.641926 | 479.250026  | 240.128651 | 478.266010  | 239.636643 | 4 |
| 13 | 1561.764534 | 781.385905 | 1544.737985 | 772.872631 | 1543.753969 | 772.380623 | S | 333.213246  | 167.110261 | 316.186697  | 158.596987 | 315.202681  | 158.104979 | 3 |
| 14 | 1660.832948 | 830.920112 | 1643.806399 | 822.406838 | 1642.822383 | 821.914830 | V | 246.181218  | 123.594247 | 229.154669  | 115.080973 |             |            | 2 |
| 15 |             |            |             |            |             |            | K | 147.112804  | 74.060040  | 130.086255  | 65.546765  |             |            | 1 |

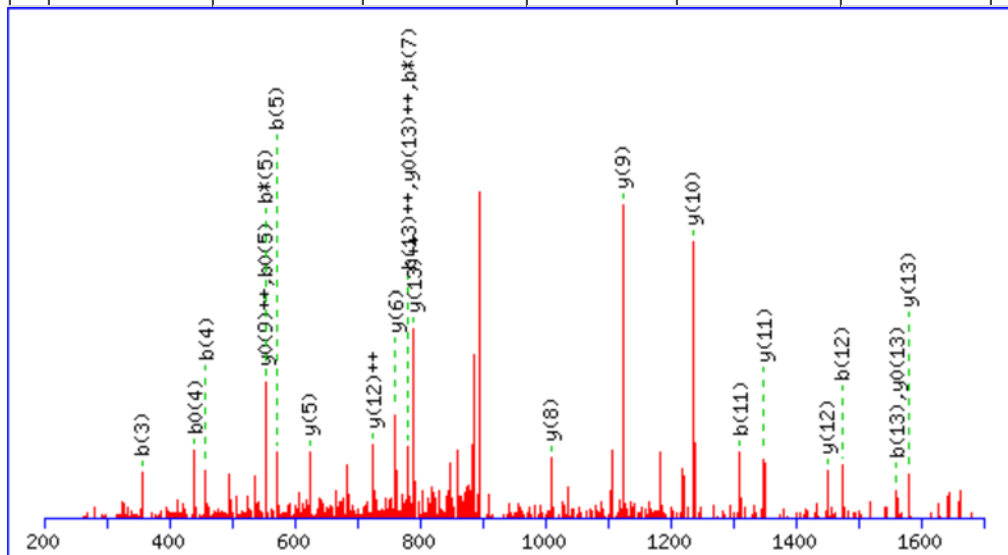

## Peptide View

MS/MS Fragmentation of **VCECRPGMFCSTSAVN**SCAR

Found in **IPI00006073**, Tax\_Id=9606 Gene\_Symbol=TNFRSF8 Isoform Long of Tumor necrosis factor receptor superfamily member 8

**Experiment:** 41 - OPD-2 **Fraction:** OPD-2

Match to Query 14590: 2347.956972 from(783.659600,3+)

Title: OECHL100312\_30.10138.10138.3.dta

Data file \\Boromir\masse\Data LTQ-Orbitrap\Chrystelle Lacroix\Etude clinique sJPU\OECHL100312\_30.raw



**Monoisotopic mass of neutral peptide Mr(calc):** 2347.958862**Fixed modifications:** Carbamidomethyl (C) (apply to specified residues or termini only)**Ions Score:** 58  
**Expect:** 4.2e-005**Matches :** 46/210 fragment ions using 73 most intense peaks ([help](#))

| #  | b                  | b <sup>++</sup>    | b*          | b <sup>*++</sup>  | b <sup>0</sup>     | b <sup>0++</sup>  | Seq. | y                  | y <sup>++</sup>    | y*                 | y <sup>*++</sup> | y <sup>0</sup>     | y <sup>0++</sup> |
|----|--------------------|--------------------|-------------|-------------------|--------------------|-------------------|------|--------------------|--------------------|--------------------|------------------|--------------------|------------------|
| 1  | 100.075690         | 50.541483          |             |                   |                    |                   | V    |                    |                    |                    |                  |                    |                  |
| 2  | <b>260.106339</b>  | 130.556807         |             |                   |                    |                   | C    | 2249.897711        | <b>1125.452493</b> | 2232.871162        | 1116.939219      | 2231.887146        | 1116.4472        |
| 3  | <b>389.148932</b>  | 195.078104         |             |                   | 371.138367         | 186.072822        | E    | 2089.867062        | <b>1045.437169</b> | 2072.840513        | 1036.923894      | 2071.856497        | 1036.4318        |
| 4  | 549.179581         | 275.093429         |             |                   | 531.169016         | 266.088146        | C    | 1960.824469        | <b>980.915873</b>  | 1943.797920        | 972.402598       | 1942.813904        | 971.9105         |
| 5  | <b>705.280692</b>  | 353.143984         | 688.254143  | 344.630710        | 687.270127         | 344.138702        | R    | 1800.793820        | 900.900548         | 1783.767271        | 892.387274       | 1782.783255        | 891.8952         |
| 6  | 802.333456         | 401.670366         | 785.306907  | 393.157092        | 784.322891         | 392.665084        | P    | <b>1644.692709</b> | <b>822.849993</b>  | 1627.666160        | 814.336718       | 1626.682144        | <b>813.8447</b>  |
| 7  | 859.354920         | 430.181098         | 842.328371  | 421.667824        | 841.344355         | 421.175816        | G    | 1547.639945        | <b>774.323611</b>  | <b>1530.613396</b> | 765.810336       | 1529.629380        | 765.3183         |
| 8  | 990.395405         | <b>495.701341</b>  | 973.368856  | 487.188066        | 972.384840         | 486.696058        | M    | 1490.618481        | 745.812879         | 1473.591932        | 737.299604       | 1472.607916        | 736.8075         |
| 9  | <b>1137.463819</b> | <b>569.235548</b>  | 1120.437270 | 560.722273        | 1119.453254        | 560.230265        | F    | <b>1359.577996</b> | 680.292636         | 1342.551447        | 671.779362       | 1341.567431        | 671.2873         |
| 10 | <b>1297.494468</b> | <b>649.250872</b>  | 1280.467919 | 640.737598        | 1279.483903        | 640.245590        | C    | <b>1212.509582</b> | <b>606.758429</b>  | 1195.483033        | 598.245155       | 1194.499017        | 597.7531         |
| 11 | 1384.526496        | 692.766886         | 1367.499947 | 684.253612        | 1366.515931        | 683.761604        | S    | <b>1052.478933</b> | 526.743105         | 1035.452384        | 518.229830       | <b>1034.468368</b> | 517.7378         |
| 12 | <b>1485.574175</b> | 743.290726         | 1468.547626 | <b>734.777451</b> | <b>1467.563610</b> | <b>734.285443</b> | T    | <b>965.446905</b>  | 483.227091         | 948.420356         | 474.713816       | <b>947.436340</b>  | 474.2218         |
| 13 | 1572.606203        | 786.806740         | 1555.579654 | 778.293465        | 1554.595638        | <b>777.801457</b> | S    | <b>864.399226</b>  | 432.703251         | 847.372677         | 424.189977       | 846.388661         | 423.6979         |
| 14 | 1643.643317        | <b>822.325297</b>  | 1626.616768 | <b>813.812022</b> | 1625.632752        | <b>813.320014</b> | A    | <b>777.367198</b>  | <b>389.187237</b>  | 760.340649         | 380.673963       | 759.356633         | 380.1819         |
| 15 | <b>1742.711731</b> | <b>871.859504</b>  | 1725.685182 | 863.346229        | 1724.701166        | 862.854221        | V    | <b>706.330084</b>  | <b>353.668680</b>  | 689.303535         | 345.155406       | 688.319519         | 344.6633         |
| 16 | 1856.754658        | <b>928.880967</b>  | 1839.728109 | 920.367693        | 1838.744093        | 919.875685        | N    | <b>607.261670</b>  | 304.134473         | 590.235121         | 295.621199       | <b>589.251105</b>  | 295.1291         |
| 17 | 1943.786686        | 972.396981         | 1926.760137 | 963.883707        | 1925.776121        | 963.391699        | S    | <b>493.218743</b>  | 247.113010         | 476.192194         | 238.599735       | 475.208178         | 238.1077         |
| 18 | 2103.817335        | <b>1052.412306</b> | 2086.790786 | 1043.899031       | 2085.806770        | 1043.407023       | C    | <b>406.186715</b>  | 203.596996         | <b>389.160166</b>  | 195.083721       |                    |                  |
| 19 | 2174.854449        | 1087.930863        | 2157.827900 | 1079.417588       | 2156.843884        | 1078.925580       | A    | <b>246.156066</b>  | 123.581671         | 229.129517         | 115.068397       |                    |                  |
| 20 |                    |                    |             |                   |                    |                   | R    | 175.118952         | 88.063114          | 158.092403         | 79.549839        |                    |                  |

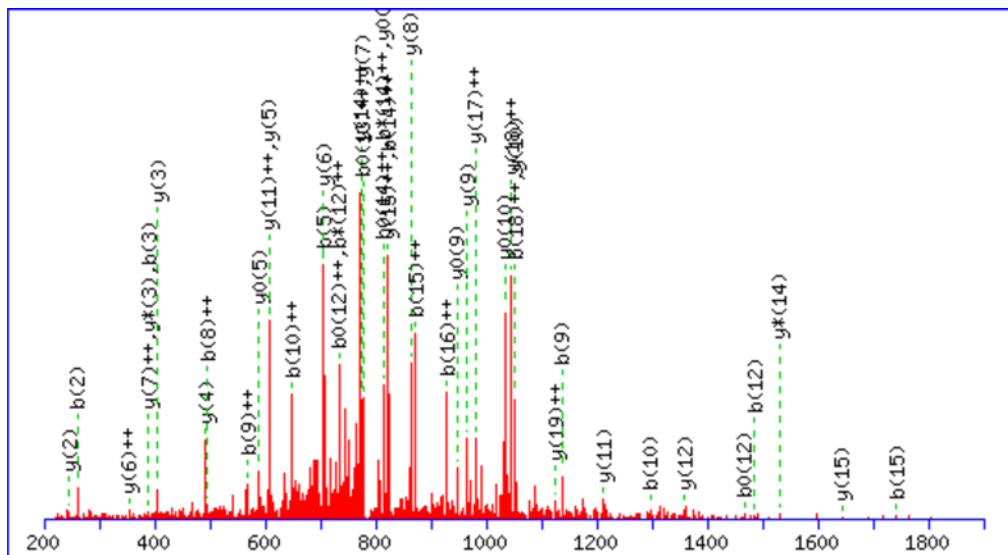

## Peptide View

MS/MS Fragmentation of **IESVLSSSGKR**

Found in **IPI00018236**, Tax\_Id=9606 Gene\_Symbol=GM2A Ganglioside GM2 activator

**Experiment:** 41 - OPD-2 **Fraction:** OPD-2

Match to Query 5756: 1161.636648 from(581.825600,2+)

Title: OECHL100312\_30.5848.5848.2.dta

Data file \\Boromir\masse\Data LTQ-Orbitrap\Chrystelle Lacroix\Etude clinique sJPU\OECHL100312\_30.raw

**Monoisotopic mass of neutral peptide Mr(calc):** 1161.635330 **Fixed modifications:** Carbamidomethyl (C) (apply to specified residues or termini only) **Ions Score:** 52

**Expect:** 0.00035 **Matches :** 26/94 fragment ions using 57 most intense peaks ([help](#))

| # | b                 | b <sup>++</sup>   | b* | b* <sup>++</sup> | b <sup>0</sup>    | b <sup>0++</sup> | Seq. | y                  | y <sup>++</sup>   | y*                | y* <sup>++</sup> | y <sup>0</sup>    | y <sup>0++</sup> | #  |
|---|-------------------|-------------------|----|------------------|-------------------|------------------|------|--------------------|-------------------|-------------------|------------------|-------------------|------------------|----|
| 1 | 114.091340        | 57.549308         |    |                  |                   |                  | I    |                    |                   |                   |                  |                   |                  | 11 |
| 2 | <b>243.133933</b> | 122.070605        |    |                  | 225.123368        | 113.065322       | E    | <b>1049.558562</b> | <b>525.282919</b> | 1032.532013       | 516.769645       | 1031.547997       | 516.277637       | 10 |
| 3 | <b>330.165961</b> | 165.586618        |    |                  | <b>312.155396</b> | 156.581336       | S    | <b>920.515969</b>  | <b>460.761623</b> | <b>903.489420</b> | 452.248348       | <b>902.505404</b> | 451.756340       | 9  |
| 4 | <b>429.234375</b> | <b>215.120826</b> |    |                  | <b>411.223810</b> | 206.115543       | V    | <b>833.483941</b>  | 417.245609        | 816.457392        | 408.732334       | 815.473376        | 408.240326       | 8  |
| 5 | 542.318439        | 271.662858        |    |                  | <b>524.307874</b> | 262.657575       | L    | <b>734.415527</b>  | <b>367.711402</b> | 717.388978        | 359.198127       | 716.404962        | 358.706119       | 7  |
| 6 | 629.350467        | 315.178872        |    |                  | <b>611.339902</b> | 306.173589       | S    | <b>621.331463</b>  | 311.169370        | 604.304914        | 302.656095       | 603.320898        | 302.164087       | 6  |

|    |            |            |            |            |            |            |   |            |            |            |            |            |            |   |
|----|------------|------------|------------|------------|------------|------------|---|------------|------------|------------|------------|------------|------------|---|
| 7  | 716.382495 | 358.694886 |            |            | 698.371930 | 349.689603 | S | 534.299435 | 267.653356 | 517.272886 | 259.140081 | 516.288870 | 258.648073 | 5 |
| 8  | 803.414523 | 402.210899 |            |            | 785.403958 | 393.205617 | S | 447.267407 | 224.137342 | 430.240858 | 215.624067 | 429.256842 | 215.132059 | 4 |
| 9  | 860.435987 | 430.721632 |            |            | 842.425422 | 421.716349 | G | 360.235379 | 180.621328 | 343.208830 | 172.108053 |            |            | 3 |
| 10 | 988.530950 | 494.769113 | 971.504401 | 486.255838 | 970.520385 | 485.763830 | K | 303.213915 | 152.110596 | 286.187366 | 143.597321 |            |            | 2 |
| 11 |            |            |            |            |            |            | R | 175.118952 | 88.063114  | 158.092403 | 79.549840  |            |            | 1 |

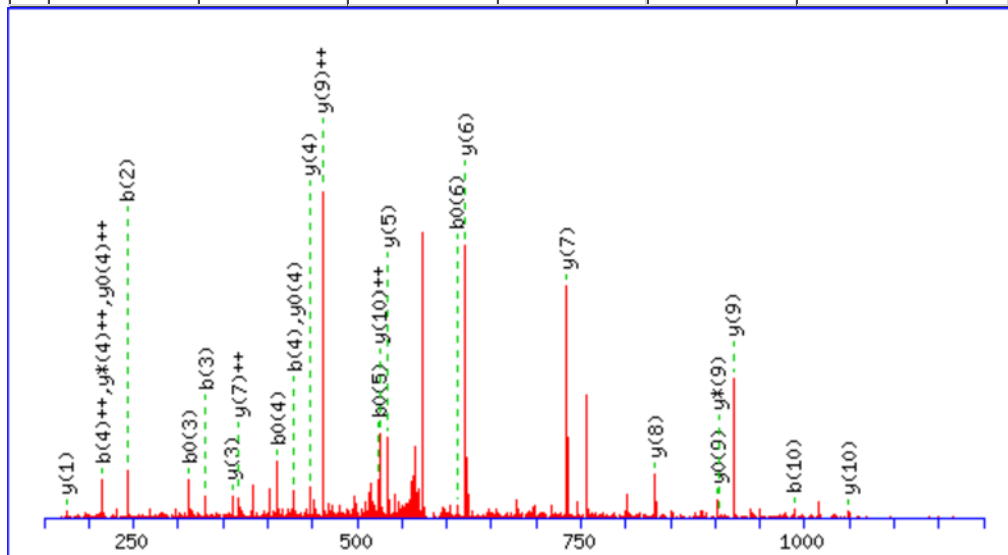

## Peptide View

MS/MS Fragmentation of **AVGLLTVISK**

Found in **IP100013446**, Tax\_Id=9606 Gene\_Symbol=PSCA Prostate stem cell antigen

**Experiment:** 38 - OPC-2 **Fraction:** OPC-2

Match to Query 3844: 999.633248 from(500.823900,2+)

Title: OECHL100312\_28.17170.17170.2.dta

Data file \\Boromir\masse\Data LTQ-Orbitrap\Chrystelle Lacroix\Etude clinique sJPU\OECHL100312\_28.raw

**Monoisotopic mass of neutral peptide Mr(calc):** 999.632828 **Fixed modifications:** Carbamidomethyl (C) (apply to specified residues or termini only) **Ions Score:** 65

**Expect:** 3.4e-006 **Matches :** 16/78 fragment ions using 25 most intense peaks ([help](#))

| # | b         | b <sup>++</sup> | b <sup>0</sup> | b <sup>0++</sup> | Seq. | y | y <sup>++</sup> | y* | y* <sup>++</sup> | y <sup>0</sup> | y <sup>0++</sup> | #  |
|---|-----------|-----------------|----------------|------------------|------|---|-----------------|----|------------------|----------------|------------------|----|
| 1 | 72.044390 | 36.525833       |                |                  | A    |   |                 |    |                  |                |                  | 10 |

|    |                   |                   |            |            |   |                   |                   |            |            |            |            |   |
|----|-------------------|-------------------|------------|------------|---|-------------------|-------------------|------------|------------|------------|------------|---|
| 2  | <b>171.112804</b> | 86.060040         |            |            | V | 929.602995        | 465.305136        | 912.576446 | 456.791861 | 911.592430 | 456.299853 | 9 |
| 3  | <b>228.134268</b> | 114.570772        |            |            | G | <b>830.534581</b> | <b>415.770929</b> | 813.508032 | 407.257654 | 812.524016 | 406.765646 | 8 |
| 4  | <b>341.218332</b> | <b>171.112804</b> |            |            | L | 773.513117        | 387.260197        | 756.486568 | 378.746922 | 755.502552 | 378.254914 | 7 |
| 5  | <b>454.302396</b> | <b>227.654836</b> |            |            | L | <b>660.429053</b> | 330.718165        | 643.402504 | 322.204890 | 642.418488 | 321.712882 | 6 |
| 6  | <b>555.350075</b> | 278.178676        | 537.339510 | 269.173393 | T | <b>547.344989</b> | 274.176133        | 530.318440 | 265.662858 | 529.334424 | 265.170850 | 5 |
| 7  | <b>654.418489</b> | 327.712883        | 636.407924 | 318.707600 | V | 446.297310        | 223.652293        | 429.270761 | 215.139018 | 428.286745 | 214.647010 | 4 |
| 8  | <b>767.502553</b> | 384.254915        | 749.491988 | 375.249632 | I | <b>347.228896</b> | 174.118086        | 330.202347 | 165.604811 | 329.218331 | 165.112803 | 3 |
| 9  | <b>854.534581</b> | 427.770929        | 836.524016 | 418.765646 | S | <b>234.144832</b> | 117.576054        | 217.118283 | 109.062779 | 216.134267 | 108.570771 | 2 |
| 10 |                   |                   |            |            | K | 147.112804        | 74.060040         | 130.086255 | 65.546765  |            |            | 1 |

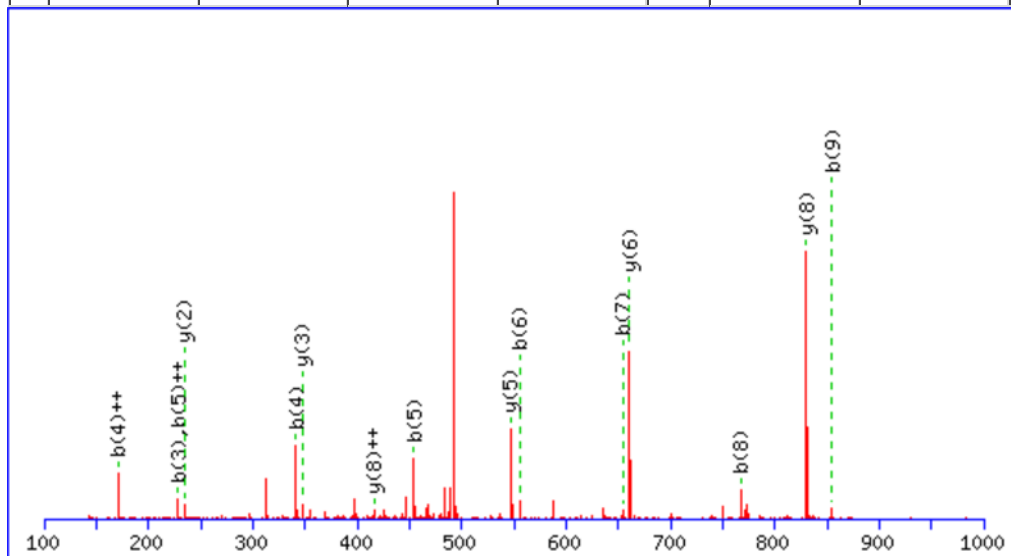

## Peptide View

MS/MS Fragmentation of **CVVTGEDGSESEATVNVK**

Found in **IPI00385035**, Tax\_Id=9606 Gene\_Symbol=NCAM1 Neural cell adhesion molecule (Fragment)

**Experiment:** 38 - OPC-2 **Fraction:** OPC-2

Match to Query 14194: 1879.851448 from(940.933000,2+)

Title: OECHL100312\_28.8481.8481.2.dta

Data file \\Boromir\masse\Data LTQ-Orbitrap\Chrystelle Lacroix\Etude clinique sJPU\OECHL100312\_28.raw

**Monoisotopic mass of neutral peptide Mr(calc):** 1879.846954**Fixed modifications:** Carbamidomethyl (C) (apply to specified residues or termini only)**Ions Score:** 118

**Expect:** 1.9e-010**Matches :** 26/160 fragment ions using 30 most intense peaks ([help](#))

| #  | b                  | b <sup>++</sup>   | b*          | b <sup>*++</sup> | b <sup>0</sup> | b <sup>0++</sup> | Seq. | y                  | y <sup>++</sup>   | y*          | y <sup>*++</sup> | y <sup>0</sup> | y <sup>0++</sup> | #  |
|----|--------------------|-------------------|-------------|------------------|----------------|------------------|------|--------------------|-------------------|-------------|------------------|----------------|------------------|----|
| 1  | 161.037925         | 81.022600         |             |                  |                |                  | C    |                    |                   |             |                  |                |                  | 18 |
| 2  | 260.106339         | 130.556807        |             |                  |                |                  | V    | 1720.823565        | 860.915421        | 1703.797016 | 852.402146       | 1702.813000    | 851.910138       | 17 |
| 3  | <b>359.174753</b>  | 180.091015        |             |                  |                |                  | V    | <b>1621.755151</b> | <b>811.381214</b> | 1604.728602 | 802.867939       | 1603.744586    | 802.375931       | 16 |
| 4  | <b>460.222432</b>  | 230.614854        |             |                  | 442.211867     | 221.609572       | T    | <b>1522.686737</b> | <b>761.847007</b> | 1505.660188 | 753.333732       | 1504.676172    | 752.841724       | 15 |
| 5  | 517.243896         | 259.125586        |             |                  | 499.233331     | 250.120304       | G    | <b>1421.639058</b> | 711.323167        | 1404.612509 | 702.809893       | 1403.628493    | 702.317885       | 14 |
| 6  | <b>646.286489</b>  | 323.646883        |             |                  | 628.275924     | 314.641600       | E    | 1364.617594        | 682.812435        | 1347.591045 | 674.299161       | 1346.607029    | 673.807153       | 13 |
| 7  | <b>761.313432</b>  | 381.160354        |             |                  | 743.302867     | 372.155072       | D    | <b>1235.575001</b> | 618.291139        | 1218.548452 | 609.777864       | 1217.564436    | 609.285856       | 12 |
| 8  | 818.334896         | 409.671086        |             |                  | 800.324331     | 400.665804       | G    | <b>1120.548058</b> | <b>560.777667</b> | 1103.521509 | 552.264393       | 1102.537493    | 551.772385       | 11 |
| 9  | 905.366924         | 453.187100        |             |                  | 887.356359     | 444.181818       | S    | <b>1063.526594</b> | 532.266935        | 1046.500045 | 523.753661       | 1045.516029    | 523.261653       | 10 |
| 10 | 1034.409517        | 517.708397        |             |                  | 1016.398952    | 508.703114       | E    | <b>976.494566</b>  | 488.750921        | 959.468017  | 480.237647       | 958.484001     | 479.745639       | 9  |
| 11 | <b>1121.441545</b> | <b>561.224411</b> |             |                  | 1103.430980    | 552.219128       | S    | <b>847.451973</b>  | 424.229625        | 830.425424  | 415.716350       | 829.441408     | 415.224342       | 8  |
| 12 | 1250.484138        | 625.745707        |             |                  | 1232.473573    | 616.740425       | E    | <b>760.419945</b>  | 380.713611        | 743.393396  | 372.200336       | 742.409380     | 371.708328       | 7  |
| 13 | <b>1321.521252</b> | 661.264264        |             |                  | 1303.510687    | 652.258982       | A    | <b>631.377352</b>  | 316.192314        | 614.350803  | 307.679040       | 613.366787     | 307.187032       | 6  |
| 14 | <b>1422.568931</b> | 711.788104        |             |                  | 1404.558366    | 702.782821       | T    | <b>560.340238</b>  | 280.673757        | 543.313689  | 272.160483       | 542.329673     | 271.668475       | 5  |
| 15 | 1521.637345        | <b>761.322311</b> |             |                  | 1503.626780    | 752.317028       | V    | <b>459.292559</b>  | 230.149918        | 442.266010  | 221.636643       |                |                  | 4  |
| 16 | 1635.680272        | 818.343774        | 1618.653723 | 809.830500       | 1617.669707    | 809.338492       | N    | <b>360.224145</b>  | 180.615711        | 343.197596  | 172.102436       |                |                  | 3  |
| 17 | <b>1734.748686</b> | 867.877981        | 1717.722137 | 859.364707       | 1716.738121    | 858.872699       | V    | 246.181218         | 123.594247        | 229.154669  | 115.080973       |                |                  | 2  |
| 18 |                    |                   |             |                  |                |                  | K    | 147.112804         | 74.060040         | 130.086255  | 65.546765        |                |                  | 1  |

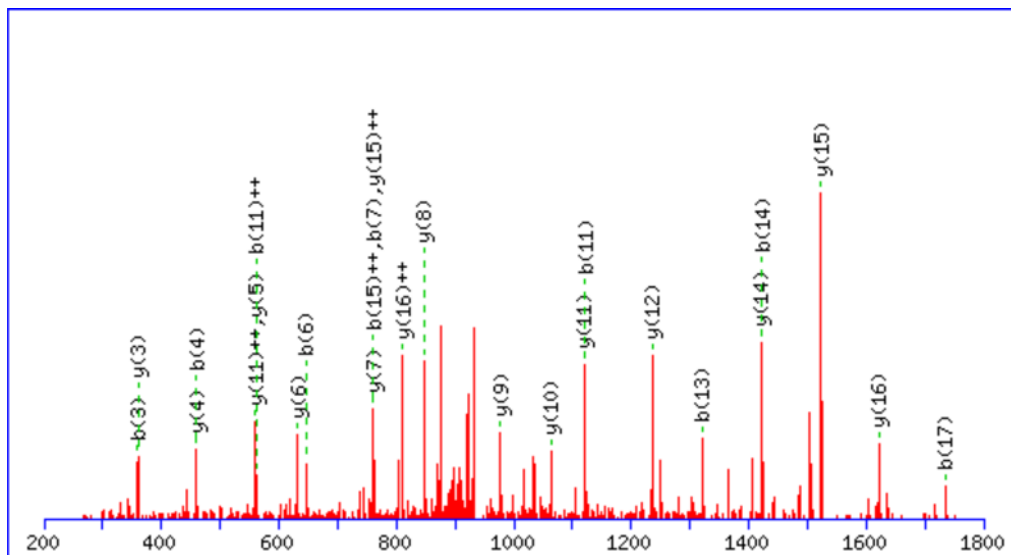

## Peptide View

MS/MS Fragmentation of **SCCSCCPVGCAK**

Found in **IPI00008752**, Tax\_Id=9606 Gene\_Symbol=MT1L;MT1G;MT1JP;MT1E Isoform 1 of Metallothionein-1G

**Experiment:** 38 - OPC-2 **Fraction:** OPC-2

Match to Query 9925: 1444.501848 from(723.258200,2+)

Title: OECHL100312\_28.3532.3532.2.dta

Data file \\Boromir\masse\Data LTQ-Orbitrap\Chrystelle Lacroix\Etude clinique sJPU\OECHL100312\_28.raw

**Monoisotopic mass of neutral peptide Mr(calc):** 1444.502609 **Fixed modifications:** Carbamidomethyl (C) (apply to specified residues or termini only) **Ions Score:** 65

**Expect:** 3.5e-007 **Matches :** 21/94 fragment ions using 24 most intense peaks ([help](#))

| # | b                 | b <sup>++</sup>   | b <sup>0</sup> | b <sup>0++</sup> | Seq. | y                  | y <sup>++</sup>   | y <sup>*</sup> | y <sup>*++</sup>  | y <sup>0</sup>     | y <sup>0++</sup> | #  |
|---|-------------------|-------------------|----------------|------------------|------|--------------------|-------------------|----------------|-------------------|--------------------|------------------|----|
| 1 | 88.039304         | 44.523290         | 70.028739      | 35.518008        | S    |                    |                   |                |                   |                    |                  | 12 |
| 2 | <b>248.069953</b> | 124.538614        | 230.059388     | 115.533332       | C    | 1358.477833        | 679.742555        | 1341.451284    | 671.229280        | <b>1340.467268</b> | 670.737272       | 11 |
| 3 | <b>408.100602</b> | 204.553939        | 390.090037     | 195.548657       | C    | <b>1198.447184</b> | <b>599.727230</b> | 1181.420635    | <b>591.213956</b> | 1180.436619        | 590.721948       | 10 |
| 4 | 495.132630        | <b>248.069953</b> | 477.122065     | 239.064671       | S    | <b>1038.416535</b> | 519.711906        | 1021.389986    | 511.198631        | 1020.405970        | 510.706623       | 9  |
| 5 | 655.163279        | 328.085278        | 637.152714     | 319.079995       | C    | <b>951.384507</b>  | 476.195892        | 934.357958     | 467.682617        |                    |                  | 8  |
| 6 | <b>815.193928</b> | <b>408.100602</b> | 797.183363     | 399.095320       | C    | <b>791.353858</b>  | 396.180567        | 774.327309     | 387.667293        |                    |                  | 7  |

|    |                    |            |                   |            |   |                   |                   |            |            |  |  |  |   |
|----|--------------------|------------|-------------------|------------|---|-------------------|-------------------|------------|------------|--|--|--|---|
| 7  | 912.246692         | 456.626984 | 894.236127        | 447.621702 | P | <b>631.323209</b> | 316.165243        | 614.296660 | 307.651968 |  |  |  | 6 |
| 8  | <b>1011.315106</b> | 506.161191 | <b>993.304541</b> | 497.155909 | V | 534.270445        | 267.638861        | 517.243896 | 259.125586 |  |  |  | 5 |
| 9  | 1068.336570        | 534.671923 | 1050.326005       | 525.666641 | G | <b>435.202031</b> | <b>218.104654</b> | 418.175482 | 209.591379 |  |  |  | 4 |
| 10 | <b>1228.367219</b> | 614.687248 | 1210.356654       | 605.681965 | C | <b>378.180567</b> | 189.593921        | 361.154018 | 181.080647 |  |  |  | 3 |
| 11 | <b>1299.404333</b> | 650.205805 | 1281.393768       | 641.200522 | A | <b>218.149918</b> | 109.578597        | 201.123369 | 101.065322 |  |  |  | 2 |
| 12 |                    |            |                   |            | K | 147.112804        | 74.060040         | 130.086255 | 65.546765  |  |  |  | 1 |

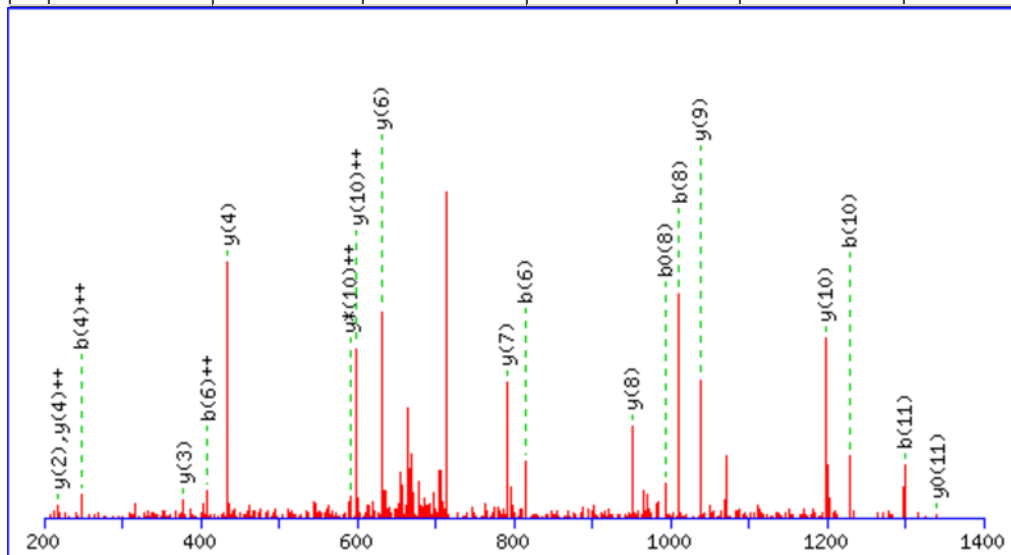

## Peptide View

MS/MS Fragmentation of **LLIYDASNLETGVPSR**

Found in **IPI00003111**, Tax\_Id=9606 Gene\_Symbol=LOC652694 Ig kappa chain V-I region AU

**Experiment:** 38 - OPC-2 **Fraction:** OPC-2

Match to Query 13232: 1746.918848 from(874.466700,2+)

Title: OECHL100312\_28.16895.16895.2.dta

Data file \\Boromir\masse\Data LTQ-Orbitrap\Chrystelle Lacroix\Etude clinique sJPU\OECHL100312\_28.raw

**Monoisotopic mass of neutral peptide Mr(calc):** 1746.915192 **Fixed modifications:** Carbamidomethyl (C) (apply to specified residues or termini only) **Ions Score:** 85

**Expect:** 4e-007 **Matches :** 31/156 fragment ions using 43 most intense peaks ([help](#))

| # | b | b <sup>++</sup> | b <sup>*</sup> | b <sup>*++</sup> | b <sup>0</sup> | b <sup>0++</sup> | Seq. | y | y <sup>++</sup> | y <sup>*</sup> | y <sup>*++</sup> | y <sup>0</sup> | y <sup>0++</sup> | # |
|---|---|-----------------|----------------|------------------|----------------|------------------|------|---|-----------------|----------------|------------------|----------------|------------------|---|
|---|---|-----------------|----------------|------------------|----------------|------------------|------|---|-----------------|----------------|------------------|----------------|------------------|---|

|           |                    |                   |                    |            |                    |            |          |                    |                   |                   |            |                    |            |           |
|-----------|--------------------|-------------------|--------------------|------------|--------------------|------------|----------|--------------------|-------------------|-------------------|------------|--------------------|------------|-----------|
| <b>1</b>  | 114.091340         | 57.549308         |                    |            |                    |            | <b>L</b> |                    |                   |                   |            |                    |            | <b>16</b> |
| <b>2</b>  | 227.175404         | 114.091340        |                    |            |                    |            | <b>L</b> | 1634.838427        | 817.922852        | 1617.811878       | 809.409577 | 1616.827862        | 808.917569 | <b>15</b> |
| <b>3</b>  | 340.259468         | 170.633372        |                    |            |                    |            | <b>I</b> | <b>1521.754363</b> | <b>761.380820</b> | 1504.727814       | 752.867545 | 1503.743798        | 752.375537 | <b>14</b> |
| <b>4</b>  | 503.322797         | 252.165036        |                    |            |                    |            | <b>Y</b> | 1408.670299        | <b>704.838788</b> | 1391.643750       | 696.325513 | <b>1390.659734</b> | 695.833505 | <b>13</b> |
| <b>5</b>  | 618.349740         | 309.678508        |                    |            | 600.339175         | 300.673226 | <b>D</b> | <b>1245.606970</b> | 623.307123        | 1228.580421       | 614.793849 | 1227.596405        | 614.301841 | <b>12</b> |
| <b>6</b>  | <b>689.386854</b>  | 345.197065        |                    |            | 671.376289         | 336.191782 | <b>A</b> | <b>1130.580027</b> | 565.793652        | 1113.553478       | 557.280377 | 1112.569462        | 556.788369 | <b>11</b> |
| <b>7</b>  | <b>776.418882</b>  | 388.713079        |                    |            | 758.408317         | 379.707796 | <b>S</b> | <b>1059.542913</b> | 530.275095        | 1042.516364       | 521.761820 | 1041.532348        | 521.269812 | <b>10</b> |
| <b>8</b>  | 890.461809         | 445.734542        | <b>873.435260</b>  | 437.221268 | 872.451244         | 436.729260 | <b>N</b> | <b>972.510885</b>  | 486.759081        | 955.484336        | 478.245806 | 954.500320         | 477.753798 | <b>9</b>  |
| <b>9</b>  | <b>1003.545873</b> | 502.276574        | <b>986.519324</b>  | 493.763300 | 985.535308         | 493.271292 | <b>L</b> | <b>858.467958</b>  | 429.737617        | 841.441409        | 421.224343 | 840.457393         | 420.732335 | <b>8</b>  |
| <b>10</b> | <b>1132.588466</b> | 566.797871        | 1115.561917        | 558.284597 | 1114.577901        | 557.792588 | <b>E</b> | <b>745.383894</b>  | 373.195585        | 728.357345        | 364.682311 | 727.373329         | 364.190303 | <b>7</b>  |
| <b>11</b> | <b>1233.636145</b> | <b>617.321710</b> | 1216.609596        | 608.808436 | <b>1215.625580</b> | 608.316428 | <b>T</b> | <b>616.341301</b>  | 308.674289        | 599.314752        | 300.161014 | 598.330736         | 299.669006 | <b>6</b>  |
| <b>12</b> | <b>1290.657609</b> | 645.832442        | 1273.631060        | 637.319168 | <b>1272.647044</b> | 636.827160 | <b>G</b> | <b>515.293622</b>  | 258.150449        | 498.267073        | 249.637175 | 497.283057         | 249.145167 | <b>5</b>  |
| <b>13</b> | <b>1389.726023</b> | 695.366649        | <b>1372.699474</b> | 686.853375 | 1371.715458        | 686.361367 | <b>V</b> | <b>458.272158</b>  | 229.639717        | 441.245609        | 221.126443 | 440.261593         | 220.634435 | <b>4</b>  |
| <b>14</b> | <b>1486.778787</b> | 743.893032        | 1469.752238        | 735.379757 | 1468.768222        | 734.887749 | <b>P</b> | <b>359.203744</b>  | 180.105510        | <b>342.177195</b> | 171.592236 | <b>341.193179</b>  | 171.100228 | <b>3</b>  |
| <b>15</b> | <b>1573.810815</b> | 787.409046        | 1556.784266        | 778.895771 | 1555.800250        | 778.403763 | <b>S</b> | 262.150980         | 131.579128        | 245.124431        | 123.065854 | 244.140415         | 122.573846 | <b>2</b>  |
| <b>16</b> |                    |                   |                    |            |                    |            | <b>R</b> | 175.118952         | 88.063114         | 158.092403        | 79.549839  |                    |            | <b>1</b>  |

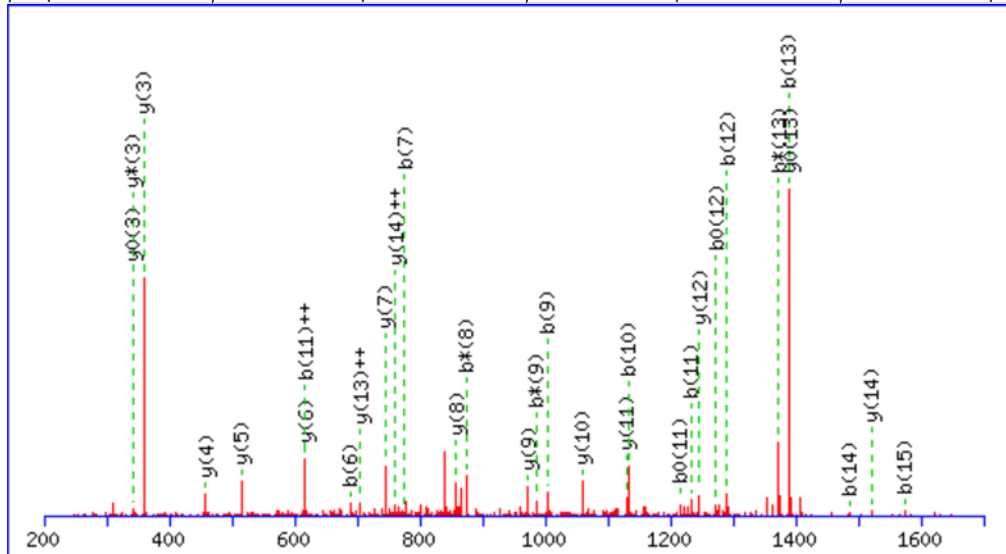



## Peptide View

MS/MS Fragmentation of **EIVYPFQGDSTVTK**

Found in **IPI00066856**, Tax\_Id=9606 Gene\_Symbol=LYPD2 Ly6/PLAUR domain-containing protein 2

**Experiment:** 38 - OPC-2 **Fraction:** OPC-2

Match to Query 11361: 1582.789448 from(792.402000,2+)

Title: OECHL100312\_28.15084.15084.2.dta

Data file \\Boromir\masse\Data LTQ-Orbitrap\Chrystelle Lacroix\Etude clinique sJPU\OECHL100312\_28.raw

**Monoisotopic mass of neutral peptide Mr(calc):** 1582.787903 **Fixed modifications:** Carbamidomethyl (C) (apply to specified residues or termini only) **Ions Score:** 53

**Expect:** 0.00063 **Matches :** 28/142 fragment ions using 52 most intense peaks ([help](#))

| #  | b                  | b <sup>++</sup> | b <sup>*</sup> | b <sup>*++</sup> | b <sup>0</sup>     | b <sup>0++</sup>  | Seq.     | y                  | y <sup>++</sup>   | y <sup>*</sup>     | y <sup>*++</sup> | y <sup>0</sup>     | y <sup>0++</sup> | #         |
|----|--------------------|-----------------|----------------|------------------|--------------------|-------------------|----------|--------------------|-------------------|--------------------|------------------|--------------------|------------------|-----------|
| 1  | 130.049869         | 65.528572       |                |                  | 112.039304         | 56.523290         | <b>E</b> |                    |                   |                    |                  |                    |                  | <b>14</b> |
| 2  | <b>243.133933</b>  | 122.070605      |                |                  | 225.123368         | 113.065322        | <b>I</b> | 1454.752574        | 727.879925        | <b>1437.726025</b> | 719.366651       | <b>1436.742009</b> | 718.874643       | <b>13</b> |
| 3  | <b>342.202347</b>  | 171.604812      |                |                  | <b>324.191782</b>  | 162.599529        | <b>V</b> | <b>1341.668510</b> | <b>671.337893</b> | 1324.641961        | 662.824619       | 1323.657945        | 662.332611       | <b>12</b> |
| 4  | <b>505.265676</b>  | 253.136476      |                |                  | <b>487.255111</b>  | 244.131194        | <b>Y</b> | <b>1242.600096</b> | <b>621.803686</b> | 1225.573547        | 613.290412       | <b>1224.589531</b> | 612.798404       | <b>11</b> |
| 5  | 602.318440         | 301.662858      |                |                  | 584.307875         | <b>292.657576</b> | <b>P</b> | <b>1079.536767</b> | <b>540.272022</b> | 1062.510218        | 531.758747       | <b>1061.526202</b> | 531.266739       | <b>10</b> |
| 6  | <b>749.386854</b>  | 375.197065      |                |                  | 731.376289         | 366.191783        | <b>F</b> | <b>982.484003</b>  | 491.745640        | <b>965.457454</b>  | 483.232365       | 964.473438         | 482.740357       | <b>9</b>  |
| 7  | <b>877.445432</b>  | 439.226354      | 860.418883     | 430.713080       | 859.434867         | 430.221072        | <b>Q</b> | <b>835.415589</b>  | 418.211433        | 818.389040         | 409.698158       | 817.405024         | 409.206150       | <b>8</b>  |
| 8  | 934.466896         | 467.737086      | 917.440347     | 459.223812       | 916.456331         | 458.731804        | <b>G</b> | <b>707.357011</b>  | 354.182144        | 690.330462         | 345.668869       | 689.346446         | 345.176861       | <b>7</b>  |
| 9  | 1049.493839        | 525.250558      | 1032.467290    | 516.737283       | 1031.483274        | 516.245275        | <b>D</b> | <b>650.335547</b>  | 325.671412        | 633.308998         | 317.158137       | 632.324982         | 316.666129       | <b>6</b>  |
| 10 | <b>1136.525867</b> | 568.766572      | 1119.499318    | 560.253297       | 1118.515302        | 559.761289        | <b>S</b> | <b>535.308604</b>  | 268.157940        | 518.282055         | 259.644666       | 517.298039         | 259.152658       | <b>5</b>  |
| 11 | 1237.573546        | 619.290411      | 1220.546997    | 610.777137       | <b>1219.562981</b> | 610.285129        | <b>T</b> | 448.276576         | 224.641926        | 431.250027         | 216.128652       | 430.266011         | 215.636644       | <b>4</b>  |
| 12 | <b>1336.641960</b> | 668.824618      | 1319.615411    | 660.311344       | 1318.631395        | 659.819336        | <b>V</b> | 347.228897         | 174.118087        | 330.202348         | 165.604812       | 329.218332         | 165.112804       | <b>3</b>  |
| 13 | <b>1437.689639</b> | 719.348458      | 1420.663090    | 710.835183       | 1419.679074        | 710.343175        | <b>T</b> | 248.160483         | 124.583879        | 231.133934         | 116.070605       | 230.149918         | 115.578597       | <b>2</b>  |
| 14 |                    |                 |                |                  |                    |                   | <b>K</b> | 147.112804         | 74.060040         | 130.086255         | 65.546765        |                    |                  | <b>1</b>  |

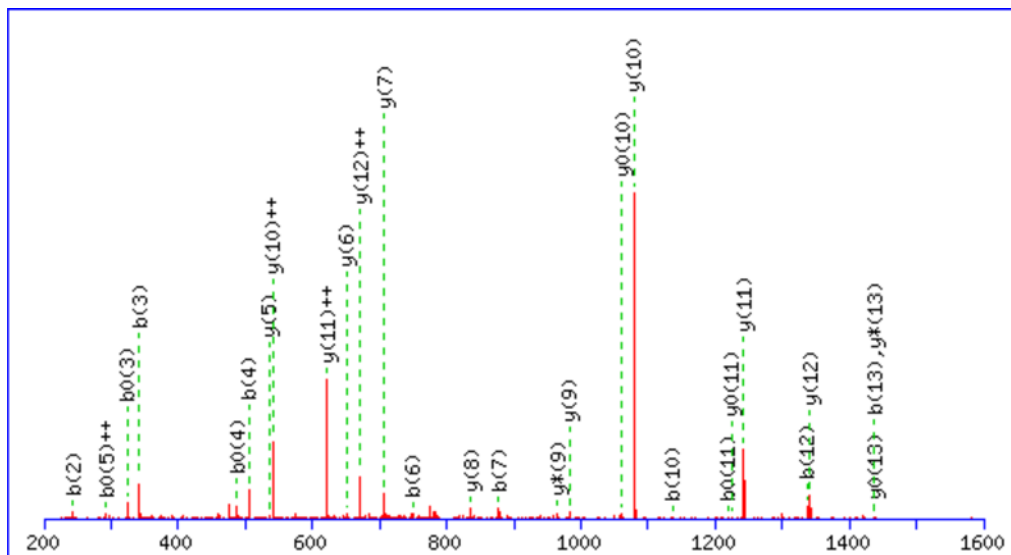

## Peptide View

MS/MS Fragmentation of **NIETIINTFHQYSVK**

Found in **IPI00027462**, Tax\_Id=9606 Gene\_Symbol=S100A9 Protein S100-A9

**Experiment:** 38 - OPC-2 **Fraction:** OPC-2

Match to Query 13677: 1805.934448 from(903.974500,2+)

Title: OECHL100312\_28.19690.19690.2.dta

Data file \\Boromir\masse\Data LTQ-Orbitrap\Chrystelle Lacroix\Etude clinique sJPU\OECHL100312\_28.raw

**Monoisotopic mass of neutral peptide Mr(calc):** 1805.931183 **Fixed modifications:** Carbamidomethyl (C) (apply to specified residues or termini only) **Ions Score:** 65

**Expect:** 3.7e-005 **Matches :** 17/160 fragment ions using 15 most intense peaks ([help](#))

| # | b          | b <sup>++</sup> | b <sup>*</sup> | b <sup>*++</sup> | b <sup>0</sup>    | b <sup>0++</sup>  | Seq. | y                  | y <sup>++</sup>   | y <sup>*</sup>     | y <sup>*++</sup> | y <sup>0</sup> | y <sup>0++</sup> | #  |
|---|------------|-----------------|----------------|------------------|-------------------|-------------------|------|--------------------|-------------------|--------------------|------------------|----------------|------------------|----|
| 1 | 115.050203 | 58.028740       | 98.023654      | 49.515465        |                   |                   | N    |                    |                   |                    |                  |                |                  | 15 |
| 2 | 228.134267 | 114.570771      | 211.107718     | 106.057497       |                   |                   | I    | 1692.895549        | 846.951413        | 1675.869000        | 838.438138       | 1674.884984    | 837.946130       | 14 |
| 3 | 357.176860 | 179.092068      | 340.150311     | 170.578793       | 339.166295        | 170.086785        | E    | 1579.811485        | <b>790.409381</b> | <b>1562.784936</b> | 781.896106       | 1561.800920    | 781.404098       | 13 |
| 4 | 458.224539 | 229.615907      | 441.197990     | 221.102633       | <b>440.213974</b> | 220.610625        | T    | <b>1450.768892</b> | <b>725.888084</b> | 1433.742343        | 717.374810       | 1432.758327    | 716.882802       | 12 |
| 5 | 571.308603 | 286.157940      | 554.282054     | 277.644665       | <b>553.298038</b> | 277.152657        | I    | <b>1349.721213</b> | 675.364245        | 1332.694664        | 666.850970       | 1331.710648    | 666.358962       | 11 |
| 6 | 684.392667 | 342.699972      | 667.366118     | 334.186697       | 666.382102        | <b>333.694689</b> | I    | <b>1236.637149</b> | 618.822213        | 1219.610600        | 610.308938       | 1218.626584    | 609.816930       | 10 |

|    |                    |            |             |            |             |            |   |                    |            |             |                   |             |                   |   |
|----|--------------------|------------|-------------|------------|-------------|------------|---|--------------------|------------|-------------|-------------------|-------------|-------------------|---|
| 7  | 798.435594         | 399.721435 | 781.409045  | 391.208161 | 780.425029  | 390.716153 | N | <b>1123.553085</b> | 562.280181 | 1106.526536 | <b>553.766906</b> | 1105.542520 | <b>553.274898</b> | 9 |
| 8  | 899.483273         | 450.245275 | 882.456724  | 441.732000 | 881.472708  | 441.239992 | T | <b>1009.510158</b> | 505.258717 | 992.483609  | 496.745443        | 991.499593  | 496.253435        | 8 |
| 9  | 1046.551687        | 523.779482 | 1029.525138 | 515.266207 | 1028.541122 | 514.774199 | F | 908.462479         | 454.734878 | 891.435930  | 446.221603        | 890.451914  | 445.729595        | 7 |
| 10 | 1183.610599        | 592.308938 | 1166.584050 | 583.795663 | 1165.600034 | 583.303655 | H | 761.394065         | 381.200671 | 744.367516  | 372.687396        | 743.383500  | 372.195388        | 6 |
| 11 | 1311.669177        | 656.338227 | 1294.642628 | 647.824952 | 1293.658612 | 647.332944 | Q | <b>624.335153</b>  | 312.671215 | 607.308604  | 304.157940        | 606.324588  | 303.665932        | 5 |
| 12 | <b>1474.732506</b> | 737.869891 | 1457.705957 | 729.356617 | 1456.721941 | 728.864609 | Y | 496.276575         | 248.641926 | 479.250026  | 240.128651        | 478.266010  | 239.636643        | 4 |
| 13 | 1561.764534        | 781.385905 | 1544.737985 | 772.872631 | 1543.753969 | 772.380623 | S | <b>333.213246</b>  | 167.110261 | 316.186697  | 158.596987        | 315.202681  | 158.104979        | 3 |
| 14 | <b>1660.832948</b> | 830.920112 | 1643.806399 | 822.406838 | 1642.822383 | 821.914830 | V | 246.181218         | 123.594247 | 229.154669  | 115.080973        |             |                   | 2 |
| 15 |                    |            |             |            |             |            | K | 147.112804         | 74.060040  | 130.086255  | 65.546765         |             |                   | 1 |

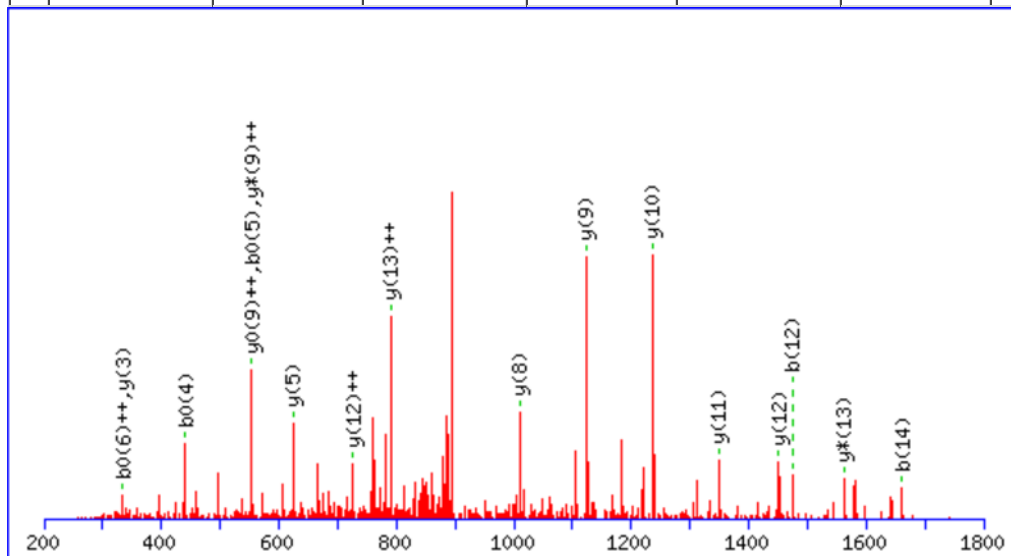

## Peptide View

MS/MS Fragmentation of **AADDTWEPFASGK**

Found in **IP100022432**, Tax\_Id=9606 Gene\_Symbol=TTR Transthyretin

**Experiment:** 38 - OPC-2 **Fraction:** OPC-2

Match to Query 9388: 1393.615048 from(697.814800,2+)

Title: OECHL100312\_28.15078.15078.2.dta

Data file \\Boromir\masse\Data LTQ-Orbitrap\Chrystelle Lacroix\Etude clinique sJPU\OECHL100312\_28.raw

**Monoisotopic mass of neutral peptide Mr(calc):** 1393.615005**Fixed modifications:** Carbamidomethyl (C) (apply to specified residues or termini only)**Ions Score:** 61  
**Expect:** 4.7e-005**Matches :** 22/112 fragment ions using 46 most intense peaks ([help](#))

| #  | b           | b <sup>++</sup> | b <sup>0</sup> | b <sup>0++</sup> | Seq. | y           | y <sup>++</sup> | y*          | y <sup>*++</sup> | y <sup>0</sup> | y <sup>0++</sup> | #  |
|----|-------------|-----------------|----------------|------------------|------|-------------|-----------------|-------------|------------------|----------------|------------------|----|
| 1  | 72.044390   | 36.525833       |                |                  | A    |             |                 |             |                  |                |                  | 13 |
| 2  | 143.081504  | 72.044390       |                |                  | A    | 1323.585173 | 662.296225      | 1306.558624 | 653.782950       | 1305.574608    | 653.290942       | 12 |
| 3  | 258.108447  | 129.557862      | 240.097882     | 120.552579       | D    | 1252.548059 | 626.777668      | 1235.521510 | 618.264393       | 1234.537494    | 617.772385       | 11 |
| 4  | 373.135390  | 187.071333      | 355.124825     | 178.066051       | D    | 1137.521116 | 569.264196      | 1120.494567 | 560.750922       | 1119.510551    | 560.258914       | 10 |
| 5  | 474.183069  | 237.595173      | 456.172504     | 228.589890       | T    | 1022.494173 | 511.750725      | 1005.467624 | 503.237450       | 1004.483608    | 502.745442       | 9  |
| 6  | 660.262382  | 330.634829      | 642.251817     | 321.629547       | W    | 921.446494  | 461.226885      | 904.419945  | 452.713611       | 903.435929     | 452.221603       | 8  |
| 7  | 789.304975  | 395.156126      | 771.294410     | 386.150843       | E    | 735.367181  | 368.187229      | 718.340632  | 359.673954       | 717.356616     | 359.181946       | 7  |
| 8  | 886.357739  | 443.682508      | 868.347174     | 434.677225       | P    | 606.324588  | 303.665932      | 589.298039  | 295.152658       | 588.314023     | 294.660650       | 6  |
| 9  | 1033.426153 | 517.216715      | 1015.415588    | 508.211432       | F    | 509.271824  | 255.139550      | 492.245275  | 246.626275       | 491.261259     | 246.134267       | 5  |
| 10 | 1104.463267 | 552.735272      | 1086.452702    | 543.729989       | A    | 362.203410  | 181.605343      | 345.176861  | 173.092068       | 344.192845     | 172.600060       | 4  |
| 11 | 1191.495295 | 596.251286      | 1173.484730    | 587.246003       | S    | 291.166296  | 146.086786      | 274.139747  | 137.573512       | 273.155731     | 137.081504       | 3  |
| 12 | 1248.516759 | 624.762018      | 1230.506194    | 615.756735       | G    | 204.134268  | 102.570772      | 187.107719  | 94.057497        |                |                  | 2  |
| 13 |             |                 |                |                  | K    | 147.112804  | 74.060040       | 130.086255  | 65.546765        |                |                  | 1  |

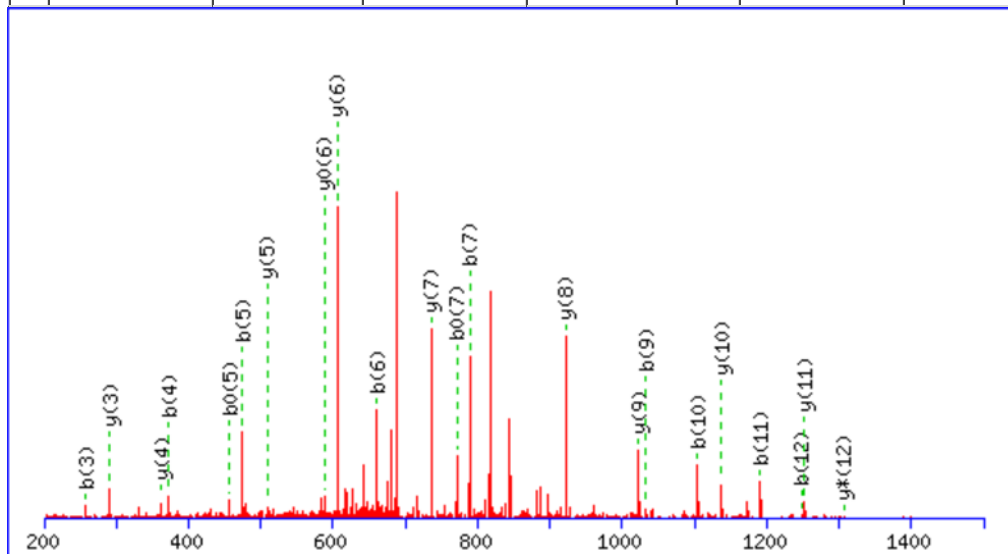

## Peptide View

MS/MS Fragmentation of **GQLPISVTCIADEIGAR**

Found in **IPI00240345**, Tax\_Id=9606 Gene\_Symbol=CLEC14A C-type lectin domain family 14 member A

**Experiment:** 38 - OPC-2 **Fraction:** OPC-2

Match to Query 13630: 1798.926648 from(900.470600,2+)

Title: OECHL100312\_28.19855.19855.2.dta

Data file \\Boromir\masse\Data LTQ-Orbitrap\Chrystelle Lacroix\Etude clinique sJPU\OECHL100312\_28.raw

**Monoisotopic mass of neutral peptide Mr(calc):** 1798.924728**Fixed modifications:** Carbamidomethyl (C) (apply to specified residues or termini only)**Ions Score:** 80

**Expect:** 1.2e-006**Matches :** 39/172 fragment ions using 86 most intense peaks ([help](#))

| #  | b                  | b <sup>++</sup>   | b*                 | b <sup>*++</sup> | b <sup>0</sup>     | b <sup>0++</sup> | Seq.     | y                  | y <sup>++</sup>   | y*                | y <sup>*++</sup>  | y <sup>0</sup>     | y <sup>0++</sup>  | #  |
|----|--------------------|-------------------|--------------------|------------------|--------------------|------------------|----------|--------------------|-------------------|-------------------|-------------------|--------------------|-------------------|----|
| 1  | 58.028740          | 29.518008         |                    |                  |                    |                  | <b>G</b> |                    |                   |                   |                   |                    |                   | 17 |
| 2  | 186.087318         | 93.547297         | 169.060769         | 85.034023        |                    |                  | <b>Q</b> | 1742.910548        | 871.958912        | 1725.883999       | 863.445638        | 1724.899983        | 862.953630        | 16 |
| 3  | <b>299.171382</b>  | 150.089329        | 282.144833         | 141.576055       |                    |                  | <b>L</b> | <b>1614.851970</b> | <b>807.929623</b> | 1597.825421       | 799.416349        | 1596.841405        | 798.924340        | 15 |
| 4  | <b>396.224146</b>  | 198.615711        | 379.197597         | 190.102436       |                    |                  | <b>P</b> | <b>1501.767906</b> | <b>751.387591</b> | 1484.741357       | <b>742.874317</b> | 1483.757341        | <b>742.382309</b> | 14 |
| 5  | <b>509.308210</b>  | 255.157743        | 492.281661         | 246.644468       |                    |                  | <b>I</b> | <b>1404.715142</b> | 702.861209        | 1387.688593       | 694.347935        | 1386.704577        | 693.855927        | 13 |
| 6  | <b>596.340238</b>  | <b>298.673757</b> | 579.313689         | 290.160483       | 578.329673         | 289.668475       | <b>S</b> | <b>1291.631078</b> | <b>646.319177</b> | 1274.604529       | 637.805903        | <b>1273.620513</b> | 637.313895        | 12 |
| 7  | <b>695.408652</b>  | 348.207964        | 678.382103         | 339.694689       | 677.398087         | 339.202681       | <b>V</b> | <b>1204.599050</b> | 602.803163        | 1187.572501       | 594.289889        | 1186.588485        | 593.797881        | 11 |
| 8  | <b>796.456331</b>  | 398.731804        | 779.429782         | 390.218529       | 778.445766         | 389.726521       | <b>T</b> | <b>1105.530636</b> | 553.268956        | 1088.504087       | 544.755682        | <b>1087.520071</b> | 544.263674        | 10 |
| 9  | <b>956.486980</b>  | 478.747128        | 939.460431         | 470.233854       | 938.476415         | 469.741846       | <b>C</b> | <b>1004.482957</b> | 502.745117        | <b>987.456408</b> | 494.231842        | 986.472392         | <b>493.739834</b> | 9  |
| 10 | <b>1069.571044</b> | 535.289160        | 1052.544495        | 526.775886       | <b>1051.560479</b> | 526.283878       | <b>I</b> | <b>844.452308</b>  | 422.729792        | 827.425759        | 414.216518        | 826.441743         | 413.724510        | 8  |
| 11 | <b>1140.608158</b> | 570.807717        | 1123.581609        | 562.294443       | 1122.597593        | 561.802435       | <b>A</b> | <b>731.368244</b>  | 366.187760        | 714.341695        | 357.674486        | 713.357679         | 357.182478        | 7  |
| 12 | <b>1255.635101</b> | 628.321189        | 1238.608552        | 619.807914       | 1237.624536        | 619.315906       | <b>D</b> | <b>660.331130</b>  | 330.669203        | 643.304581        | 322.155929        | 642.320565         | 321.663921        | 6  |
| 13 | <b>1384.677694</b> | 692.842485        | 1367.651145        | 684.329211       | 1366.667129        | 683.837203       | <b>E</b> | <b>545.304187</b>  | 273.155732        | 528.277638        | 264.642457        | 527.293622         | 264.150449        | 5  |
| 14 | <b>1497.761758</b> | 749.384517        | <b>1480.735209</b> | 740.871243       | 1479.751193        | 740.379235       | <b>I</b> | <b>416.261594</b>  | 208.634435        | 399.235045        | 200.121160        |                    |                   | 4  |
| 15 | <b>1554.783222</b> | 777.895249        | 1537.756673        | 769.381975       | 1536.772657        | 768.889967       | <b>G</b> | <b>303.177530</b>  | 152.092403        | 286.150981        | 143.579128        |                    |                   | 3  |
| 16 | <b>1625.820336</b> | 813.413806        | 1608.793787        | 804.900532       | 1607.809771        | 804.408524       | <b>A</b> | 246.156066         | 123.581671        | 229.129517        | 115.068396        |                    |                   | 2  |
| 17 |                    |                   |                    |                  |                    |                  | <b>R</b> | 175.118952         | 88.063114         | 158.092403        | 79.549839         |                    |                   | 1  |

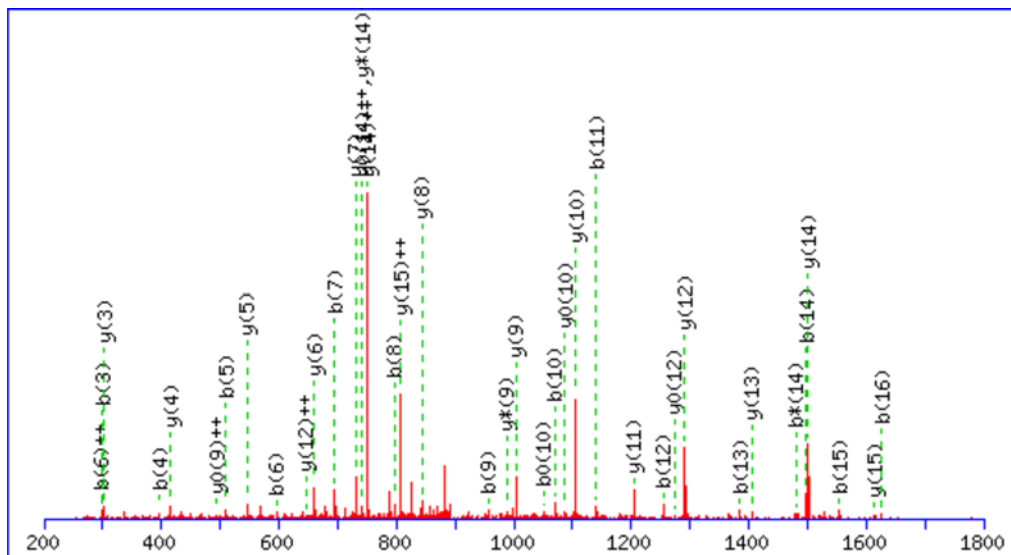

## Peptide View

MS/MS Fragmentation of **KAGPCEQAGSPCR**

Found in **IPI00028381**, Tax\_Id=9606 Gene\_Symbol=DLK2 Isoform 1 of Protein delta homolog 2

**Experiment:** 38 - OPC-2 **Fraction:** OPC-2

Match to Query 9607: 1416.624648 from(709.319600,2+)

Title: OECHL100312\_28.2324.2324.2.dta

Data file \\Boromir\masse\Data LTQ-Orbitrap\Chrystelle Lacroix\Etude clinique sJPU\OECHL100312\_28.raw

**Monoisotopic mass of neutral peptide Mr(calc):** 1416.623810 **Fixed modifications:** Carbamidomethyl (C) (apply to specified residues or termini only) **Ions Score:** 69

**Expect:** 7.4e-006 **Matches :** 21/128 fragment ions using 37 most intense peaks ([help](#))

| # | b                 | b <sup>++</sup>   | b <sup>*</sup>    | b <sup>*++</sup> | b <sup>0</sup> | b <sup>0++</sup> | Seq.     | y                  | y <sup>++</sup>   | y <sup>*</sup> | y <sup>*++</sup> | y <sup>0</sup> | y <sup>0++</sup> | #         |
|---|-------------------|-------------------|-------------------|------------------|----------------|------------------|----------|--------------------|-------------------|----------------|------------------|----------------|------------------|-----------|
| 1 | 129.102239        | 65.054757         | 112.075690        | 56.541483        |                |                  | <b>K</b> |                    |                   |                |                  |                |                  | <b>13</b> |
| 2 | 200.139353        | 100.573315        | 183.112804        | 92.060040        |                |                  | <b>A</b> | <b>1289.536133</b> | 645.271705        | 1272.509584    | 636.758430       | 1271.525568    | 636.266422       | <b>12</b> |
| 3 | <b>257.160817</b> | 129.084047        | <b>240.134268</b> | 120.570772       |                |                  | <b>G</b> | <b>1218.499019</b> | 609.753148        | 1201.472470    | 601.239873       | 1200.488454    | 600.747865       | <b>11</b> |
| 4 | 354.213581        | 177.610429        | 337.187032        | 169.097154       |                |                  | <b>P</b> | <b>1161.477555</b> | <b>581.242416</b> | 1144.451006    | 572.729141       | 1143.466990    | 572.237133       | <b>10</b> |
| 5 | 514.244230        | <b>257.625753</b> | 497.217681        | 249.112479       |                |                  | <b>C</b> | <b>1064.424791</b> | 532.716034        | 1047.398242    | 524.202759       | 1046.414226    | 523.710751       | <b>9</b>  |
| 6 | 643.286823        | 322.147050        | 626.260274        | 313.633775       | 625.276258     | 313.141767       | <b>E</b> | <b>904.394142</b>  | 452.700709        | 887.367593     | 444.187434       | 886.383577     | 443.695427       | <b>8</b>  |

|    |             |            |             |            |             |            |   |            |            |            |            |            |            |   |
|----|-------------|------------|-------------|------------|-------------|------------|---|------------|------------|------------|------------|------------|------------|---|
| 7  | 771.345401  | 386.176339 | 754.318852  | 377.663064 | 753.334836  | 377.171056 | Q | 775.351549 | 388.179413 | 758.325000 | 379.666138 | 757.340984 | 379.174130 | 7 |
| 8  | 842.382515  | 421.694896 | 825.355966  | 413.181621 | 824.371950  | 412.689613 | A | 647.292971 | 324.150124 | 630.266422 | 315.636849 | 629.282406 | 315.144841 | 6 |
| 9  | 899.403979  | 450.205628 | 882.377430  | 441.692353 | 881.393414  | 441.200345 | G | 576.255857 | 288.631567 | 559.229308 | 280.118292 | 558.245292 | 279.626284 | 5 |
| 10 | 986.436007  | 493.721642 | 969.409458  | 485.208367 | 968.425442  | 484.716359 | S | 519.234393 | 260.120835 | 502.207844 | 251.607560 | 501.223828 | 251.115552 | 4 |
| 11 | 1083.488771 | 542.248024 | 1066.462222 | 533.734749 | 1065.478206 | 533.242741 | P | 432.202365 | 216.604820 | 415.175816 | 208.091546 |            |            | 3 |
| 12 | 1243.519420 | 622.263348 | 1226.492871 | 613.750074 | 1225.508855 | 613.258066 | C | 335.149601 | 168.078438 | 318.123052 | 159.565164 |            |            | 2 |
| 13 |             |            |             |            |             |            | R | 175.118952 | 88.063114  | 158.092403 | 79.549839  |            |            | 1 |

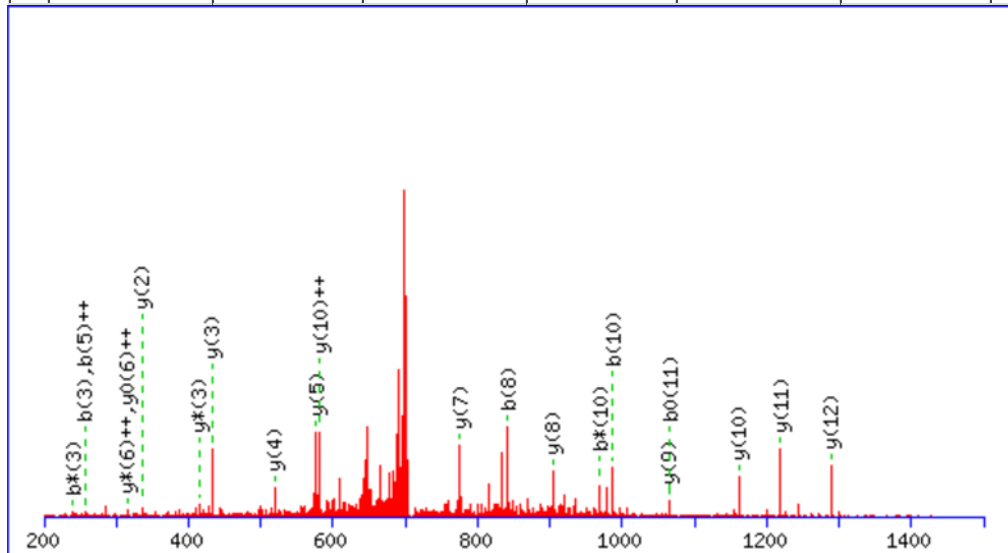

## Peptide View

MS/MS Fragmentation of **NPVLQQDAHSSVTITPQR**

Found in **IPI00410488**, Tax\_Id=9606 Gene\_Symbol=CD276 Isoform 1 of CD276 antigen

Experiment: 38 - OPC-2 Fraction: OPC-2

Match to Query 14840: 1990.018872 from(664.346900,3+)

Title: OECHL100312\_28.9590.9590.3.dta

Data file \\Boromir\masse\Data LTQ-Orbitrap\Chrystelle Lacroix\Etude clinique sJPU\OECHL100312\_28.raw

**Monoisotopic mass of neutral peptide Mr(calc):** 1990.023209**Fixed modifications:** Carbamidomethyl (C) (apply to specified residues or termini only)**Ions Score:** 50

**Expect:** 0.0016**Matches :** 67/186 fragment ions using 125 most intense peaks ([help](#))

| #  | <b>b</b>           | <b>b<sup>++</sup></b> | <b>b*</b>          | <b>b<sup>*++</sup></b> | <b>b<sup>0</sup></b> | <b>b<sup>0++</sup></b> | Seq. | <b>y</b>           | <b>y<sup>++</sup></b> | <b>y*</b>          | <b>y<sup>*++</sup></b> | <b>y<sup>0</sup></b> | <b>y<sup>0++</sup></b> | #  |
|----|--------------------|-----------------------|--------------------|------------------------|----------------------|------------------------|------|--------------------|-----------------------|--------------------|------------------------|----------------------|------------------------|----|
| 1  | 115.050203         | 58.028740             | 98.023654          | 49.515465              |                      |                        | N    |                    |                       |                    |                        |                      |                        | 18 |
| 2  | <b>212.102967</b>  | 106.555121            | <b>195.076418</b>  | 98.041847              |                      |                        | P    | 1876.987553        | 938.997415            | 1859.961004        | 930.484140             | 1858.976988          | 929.992132             | 17 |
| 3  | <b>311.171381</b>  | 156.089328            | <b>294.144832</b>  | 147.576054             |                      |                        | V    | 1779.934789        | <b>890.471033</b>     | 1762.908240        | 881.957758             | 1761.924224          | 881.465750             | 16 |
| 4  | <b>424.255445</b>  | <b>212.631361</b>     | <b>407.228896</b>  | 204.118086             |                      |                        | L    | 1680.866375        | <b>840.936826</b>     | 1663.839826        | <b>832.423551</b>      | 1662.855810          | <b>831.931543</b>      | 15 |
| 5  | 552.314023         | <b>276.660650</b>     | 535.287474         | 268.147375             |                      |                        | Q    | 1567.782311        | <b>784.394794</b>     | 1550.755762        | <b>775.881519</b>      | 1549.771746          | <b>775.389511</b>      | 14 |
| 6  | <b>680.372601</b>  | 340.689939            | 663.346052         | 332.176664             |                      |                        | Q    | 1439.723733        | <b>720.365505</b>     | 1422.697184        | <b>711.852230</b>      | 1421.713168          | <b>711.360222</b>      | 13 |
| 7  | <b>795.399544</b>  | 398.203410            | 778.372995         | 389.690136             | 777.388979           | 389.198128             | D    | <b>1311.665155</b> | <b>656.336215</b>     | 1294.638606        | 647.822941             | 1293.654590          | <b>647.330933</b>      | 12 |
| 8  | 866.436658         | 433.721967            | 849.410109         | <b>425.208693</b>      | 848.426093           | <b>424.716685</b>      | A    | <b>1196.638212</b> | <b>598.822744</b>     | <b>1179.611663</b> | <b>590.309470</b>      | <b>1178.627647</b>   | <b>589.817462</b>      | 11 |
| 9  | 1003.495570        | <b>502.251423</b>     | 986.469021         | 493.738149             | 985.485005           | 493.246141             | H    | 1125.601098        | <b>563.304187</b>     | 1108.574549        | 554.790913             | 1107.590533          | 554.298905             | 10 |
| 10 | 1090.527598        | <b>545.767437</b>     | 1073.501049        | 537.254163             | 1072.517033          | 536.762155             | S    | <b>988.542186</b>  | 494.774731            | 971.515637         | 486.261457             | 970.531621           | 485.769449             | 9  |
| 11 | <b>1177.559626</b> | <b>589.283451</b>     | <b>1160.533077</b> | <b>580.770177</b>      | <b>1159.549061</b>   | <b>580.278169</b>      | S    | <b>901.510158</b>  | 451.258717            | 884.483609         | 442.745443             | 883.499593           | 442.253435             | 8  |
| 12 | <b>1276.628040</b> | 638.817658            | <b>1259.601491</b> | <b>630.304384</b>      | 1258.617475          | <b>629.812376</b>      | V    | <b>814.478130</b>  | <b>407.742703</b>     | <b>797.451581</b>  | 399.229428             | <b>796.467565</b>    | 398.737420             | 7  |
| 13 | <b>1377.675719</b> | 689.341498            | <b>1360.649170</b> | <b>680.828223</b>      | <b>1359.665154</b>   | <b>680.336215</b>      | T    | <b>715.409716</b>  | <b>358.208496</b>     | 698.383167         | 349.695221             | 697.399151           | 349.203213             | 6  |
| 14 | 1490.759783        | 745.883530            | 1473.733234        | <b>737.370255</b>      | 1472.749218          | <b>736.878247</b>      | I    | <b>614.362037</b>  | 307.684656            | 597.335488         | 299.171382             | 596.351472           | 298.679374             | 5  |
| 15 | 1591.807462        | <b>796.407369</b>     | 1574.780913        | <b>787.894095</b>      | 1573.796897          | <b>787.402087</b>      | T    | <b>501.277973</b>  | 251.142624            | 484.251424         | 242.629350             | 483.267408           | 242.137342             | 4  |
| 16 | 1688.860226        | 844.933751            | 1671.833677        | 836.420477             | 1670.849661          | 835.928469             | P    | <b>400.230294</b>  | 200.618785            | <b>383.203745</b>  | 192.105510             |                      |                        | 3  |
| 17 | 1816.918804        | 908.963040            | 1799.892255        | 900.449766             | 1798.908239          | 899.957758             | Q    | <b>303.177530</b>  | 152.092403            | 286.150981         | 143.579128             |                      |                        | 2  |
| 18 |                    |                       |                    |                        |                      |                        | R    | 175.118952         | 88.063114             | 158.092403         | 79.549839              |                      |                        | 1  |



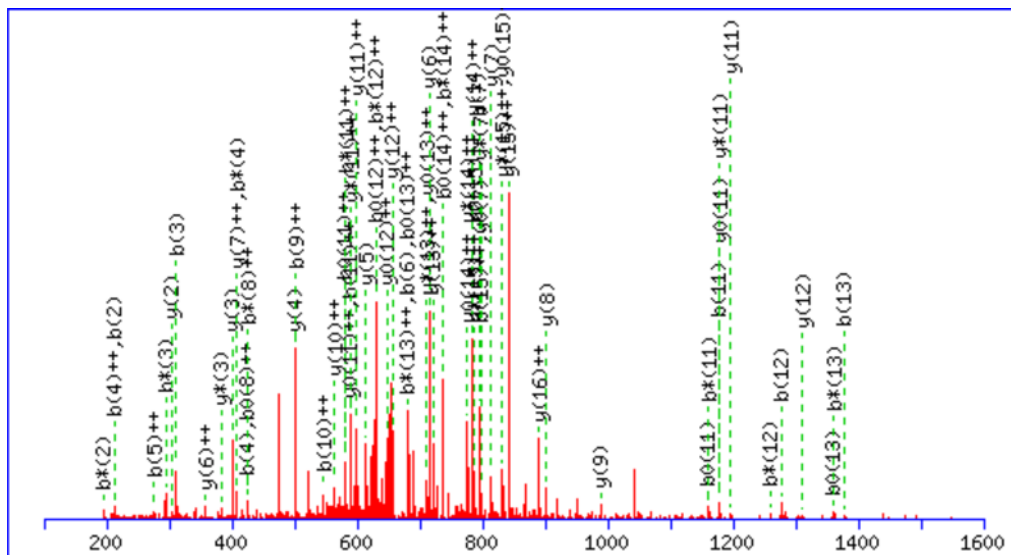

## Peptide View

MS/MS Fragmentation of **TVAGPVGGSLSVQCPYEKEHR**

Found in **IP100414784**, Tax\_Id=9606 Gene\_Symbol=CD300A Isoform 1 of CMRF35-like molecule 8

**Experiment:** 38 - OPC-2 **Fraction:** OPC-2

Match to Query 16202: 2270.113448 from(1136.064000,2+)

Title: OECHL100312\_28.10107.10107.2.dta

Data file \\Boromir\masse\Data LTQ-Orbitrap\Chrystelle Lacroix\Etude clinique sJPU\OECHL100312\_28.raw

**Monoisotopic mass of neutral peptide Mr(calc):** 2270.111374 **Fixed modifications:** Carbamidomethyl (C) (apply to specified residues or termini only) **Ions Score:** 73

**Expect:** 1e-005 **Matches :** 23/212 fragment ions using 34 most intense peaks ([help](#))

| # | b          | b <sup>++</sup> | b <sup>*</sup> | b <sup>*++</sup> | b <sup>0</sup> | b <sup>0++</sup> | Seq.     | y           | y <sup>++</sup>    | y <sup>*</sup> | y <sup>*++</sup> | y <sup>0</sup> | y <sup>0++</sup> |
|---|------------|-----------------|----------------|------------------|----------------|------------------|----------|-------------|--------------------|----------------|------------------|----------------|------------------|
| 1 | 102.054955 | 51.531116       |                |                  | 84.044390      | 42.525833        | <b>T</b> |             |                    |                |                  |                |                  |
| 2 | 201.123369 | 101.065322      |                |                  | 183.112804     | 92.060040        | <b>V</b> | 2170.070965 | 1085.539120        | 2153.044416    | 1077.025846      | 2152.060400    | 1076.5338        |
| 3 | 272.160483 | 136.583879      |                |                  | 254.149918     | 127.578597       | <b>A</b> | 2071.002551 | <b>1036.004913</b> | 2053.976002    | 1027.491639      | 2052.991986    | 1026.9996        |
| 4 | 329.181947 | 165.094611      |                |                  | 311.171382     | 156.089329       | <b>G</b> | 1999.965437 | <b>1000.486357</b> | 1982.938888    | 991.973082       | 1981.954872    | 991.4810         |
| 5 | 426.234711 | 213.620994      |                |                  | 408.224146     | 204.615711       | <b>P</b> | 1942.943973 | 971.975625         | 1925.917424    | 963.462350       | 1924.933408    | 962.9703         |
| 6 | 525.303125 | 263.155201      |                |                  | 507.292560     | 254.149918       | <b>V</b> | 1845.891209 | 923.449243         | 1828.864660    | 914.935968       | 1827.880644    | 914.4439         |

|    |             |             |             |             |             |             |   |             |            |             |            |             |          |
|----|-------------|-------------|-------------|-------------|-------------|-------------|---|-------------|------------|-------------|------------|-------------|----------|
| 7  | 582.324589  | 291.665933  |             |             | 564.314024  | 282.660650  | G | 1746.822795 | 873.915036 | 1729.796246 | 865.401761 | 1728.812230 | 864.9097 |
| 8  | 639.346053  | 320.176665  |             |             | 621.335488  | 311.171382  | G | 1689.801331 | 845.404304 | 1672.774782 | 836.891029 | 1671.790766 | 836.3990 |
| 9  | 726.378081  | 363.692679  |             |             | 708.367516  | 354.687396  | S | 1632.779867 | 816.893572 | 1615.753318 | 808.380297 | 1614.769302 | 807.8882 |
| 10 | 839.462145  | 420.234711  |             |             | 821.451580  | 411.229428  | L | 1545.747839 | 773.377558 | 1528.721290 | 764.864283 | 1527.737274 | 764.3722 |
| 11 | 926.494173  | 463.750725  |             |             | 908.483608  | 454.745442  | S | 1432.663775 | 716.835526 | 1415.637226 | 708.322251 | 1414.653210 | 707.8302 |
| 12 | 1025.562587 | 513.284932  |             |             | 1007.552022 | 504.279649  | V | 1345.631747 | 673.319512 | 1328.605198 | 664.806237 | 1327.621182 | 664.3142 |
| 13 | 1153.621165 | 577.314221  | 1136.594616 | 568.800946  | 1135.610600 | 568.308938  | Q | 1246.563333 | 623.785305 | 1229.536784 | 615.272030 | 1228.552768 | 614.7800 |
| 14 | 1313.651814 | 657.329545  | 1296.625265 | 648.816271  | 1295.641249 | 648.324263  | C | 1118.504755 | 559.756016 | 1101.478206 | 551.242741 | 1100.494190 | 550.7507 |
| 15 | 1410.704578 | 705.855927  | 1393.678029 | 697.342653  | 1392.694013 | 696.850645  | P | 958.474106  | 479.740691 | 941.447557  | 471.227417 | 940.463541  | 470.7354 |
| 16 | 1573.767907 | 787.387592  | 1556.741358 | 778.874317  | 1555.757342 | 778.382309  | Y | 861.421342  | 431.214309 | 844.394793  | 422.701035 | 843.410777  | 422.2090 |
| 17 | 1702.810500 | 851.908888  | 1685.783951 | 843.395614  | 1684.799935 | 842.903606  | E | 698.358013  | 349.682645 | 681.331464  | 341.169370 | 680.347448  | 340.6773 |
| 18 | 1830.905463 | 915.956370  | 1813.878914 | 907.443095  | 1812.894898 | 906.951087  | K | 569.315420  | 285.161348 | 552.288871  | 276.648074 | 551.304855  | 276.1560 |
| 19 | 1959.948056 | 980.477666  | 1942.921507 | 971.964392  | 1941.937491 | 971.472384  | E | 441.220457  | 221.113867 | 424.193908  | 212.600592 | 423.209892  | 212.1085 |
| 20 | 2097.006968 | 1049.007122 | 2079.980419 | 1040.493847 | 2078.996403 | 1040.001840 | H | 312.177864  | 156.592570 | 295.151315  | 148.079295 |             |          |
| 21 |             |             |             |             |             |             | R | 175.118952  | 88.063114  | 158.092403  | 79.549839  |             |          |

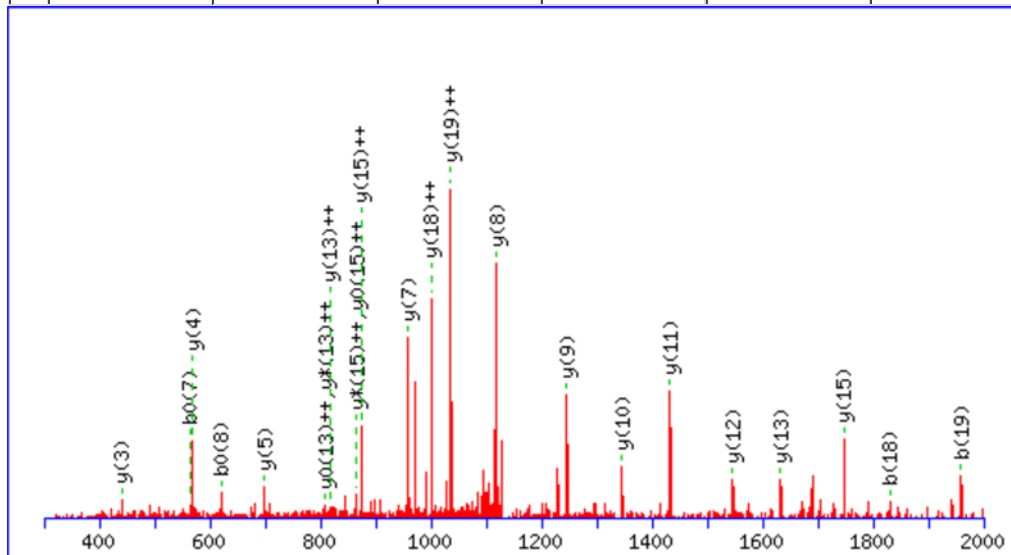

## Peptide View

MS/MS Fragmentation of **VLSNTEDLPLVTK**Found in **IPI00218851**, Tax\_Id=9606 Gene\_Symbol=LYNX1 Ly-6 neurotoxin-like protein 1 isoform a**Experiment:** 38 - OPC-2 **Fraction:** OPC-2

Match to Query 9678: 1427.787248 from(714.900900,2+)

Title: OECHL100312\_28.14351.14351.2.dta

Data file \\Boromir\masse\Data LTQ-Orbitrap\Chrystelle Lacroix\Etude clinique sJPU\OECHL100312\_28.raw

**Monoisotopic mass of neutral peptide Mr(calc):** 1427.787155**Fixed modifications:** Carbamidomethyl (C) (apply to specified residues or termini only)**Ions Score:** 56**Expect:** 0.00019**Matches :** 28/132 fragment ions using 60 most intense peaks ([help](#))

| #  | b                  | b <sup>++</sup> | b <sup>*</sup>     | b <sup>*++</sup>  | b <sup>0</sup>     | b <sup>0++</sup>  | Seq. | y                  | y <sup>++</sup>   | y <sup>*</sup> | y <sup>*++</sup>  | y <sup>0</sup> | y <sup>0++</sup>  | #  |
|----|--------------------|-----------------|--------------------|-------------------|--------------------|-------------------|------|--------------------|-------------------|----------------|-------------------|----------------|-------------------|----|
| 1  | 100.075690         | 50.541483       |                    |                   |                    |                   | V    |                    |                   |                |                   |                |                   | 13 |
| 2  | <b>213.159754</b>  | 107.083515      |                    |                   |                    |                   | L    | <b>1329.726023</b> | 665.366650        | 1312.699474    | 656.853375        | 1311.715458    | 656.361367        | 12 |
| 3  | <b>300.191782</b>  | 150.599529      |                    |                   | 282.181217         | 141.594247        | S    | <b>1216.641959</b> | <b>608.824618</b> | 1199.615410    | <b>600.311343</b> | 1198.631394    | <b>599.819335</b> | 11 |
| 4  | 414.234709         | 207.620993      | 397.208160         | 199.107718        | 396.224144         | 198.615710        | N    | <b>1129.609931</b> | 565.308604        | 1112.583382    | 556.795329        | 1111.599366    | 556.303321        | 10 |
| 5  | 515.282388         | 258.144832      | 498.255839         | 249.631558        | 497.271823         | 249.139550        | T    | <b>1015.567004</b> | 508.287140        | 998.540455     | 499.773866        | 997.556439     | 499.281858        | 9  |
| 6  | 644.324981         | 322.666129      | 627.298432         | 314.152854        | 626.314416         | 313.660846        | E    | <b>914.519325</b>  | 457.763301        | 897.492776     | 449.250026        | 896.508760     | 448.758018        | 8  |
| 7  | <b>759.351924</b>  | 380.179600      | 742.325375         | <b>371.666326</b> | 741.341359         | <b>371.174318</b> | D    | <b>785.476732</b>  | 393.242004        | 768.450183     | 384.728730        | 767.466167     | 384.236722        | 7  |
| 8  | <b>872.435988</b>  | 436.721632      | <b>855.409439</b>  | 428.208358        | <b>854.425423</b>  | 427.716350        | L    | <b>670.449789</b>  | 335.728533        | 653.423240     | 327.215258        | 652.439224     | 326.723250        | 6  |
| 9  | 969.488752         | 485.248014      | 952.462203         | 476.734740        | 951.478187         | 476.242732        | P    | <b>557.365725</b>  | 279.186501        | 540.339176     | 270.673226        | 539.355160     | 270.181218        | 5  |
| 10 | <b>1082.572816</b> | 541.790046      | <b>1065.546267</b> | 533.276772        | 1064.562251        | 532.784764        | L    | 460.312961         | 230.660119        | 443.286412     | 222.146844        | 442.302396     | 221.654836        | 4  |
| 11 | <b>1181.641230</b> | 591.324253      | <b>1164.614681</b> | 582.810979        | <b>1163.630665</b> | 582.318971        | V    | <b>347.228897</b>  | 174.118087        | 330.202348     | 165.604812        | 329.218332     | 165.112804        | 3  |
| 12 | <b>1282.688909</b> | 641.848093      | 1265.662360        | 633.334818        | <b>1264.678344</b> | 632.842810        | T    | <b>248.160483</b>  | 124.583879        | 231.133934     | 116.070605        | 230.149918     | 115.578597        | 2  |
| 13 |                    |                 |                    |                   |                    |                   | K    | 147.112804         | 74.060040         | 130.086255     | 65.546765         |                |                   | 1  |

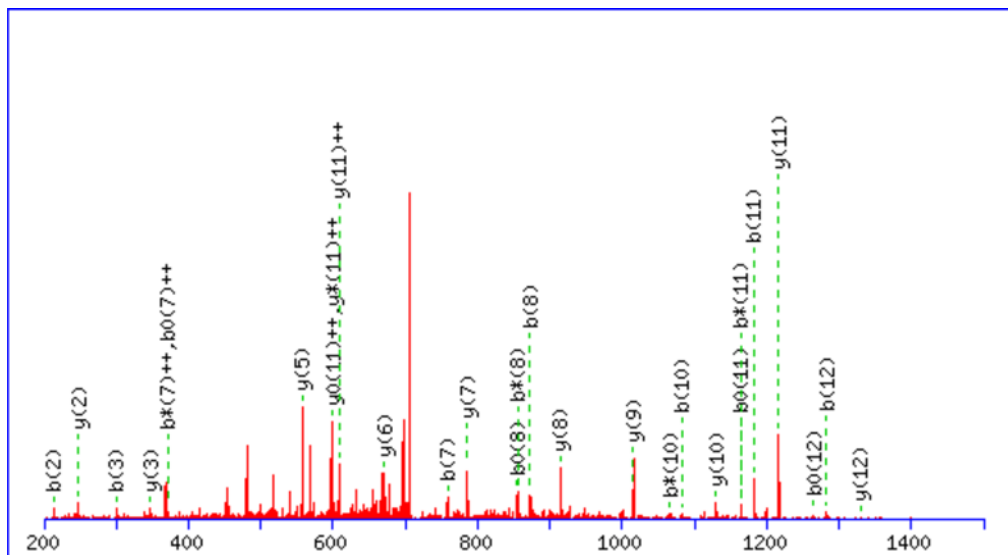

## Peptide View

MS/MS Fragmentation of **SGVYQHVTGEMMGHAIR**

Found in **IPI00295741**, Tax\_Id=9606 Gene\_Symbol=CTSB Cathepsin B

**Experiment:** 38 - OPC-2 **Fraction:** OPC-2

Match to Query 14523: 1928.898972 from(643.973600,3+)

Title: OECHL100312\_28.11727.11727.3.dta

Data file \\Boromir\masse\Data LTQ-Orbitrap\Chrystelle Lacroix\Etude clinique sJPU\OECHL100312\_28.raw

**Monoisotopic mass of neutral peptide Mr(calc):** 1928.898544 **Fixed modifications:** Carbamidomethyl (C) (apply to specified residues or termini only) **Ions Score:** 57

**Expect:** 0.00033 **Matches :** 36/180 fragment ions using 70 most intense peaks ([help](#))

| # | b          | b <sup>++</sup> | b*         | b* <sup>++</sup> | b <sup>0</sup> | b <sup>0++</sup> | Seq. | y           | y <sup>++</sup> | y*          | y* <sup>++</sup> | y <sup>0</sup> | y <sup>0++</sup> | #  |
|---|------------|-----------------|------------|------------------|----------------|------------------|------|-------------|-----------------|-------------|------------------|----------------|------------------|----|
| 1 | 88.039304  | 44.523290       |            |                  | 70.028739      | 35.518008        | S    |             |                 |             |                  |                |                  | 18 |
| 2 | 145.060768 | 73.034022       |            |                  | 127.050203     | 64.028740        | G    | 1842.873787 | 921.940531      | 1825.847238 | 913.427257       | 1824.863222    | 912.935249       | 17 |
| 3 | 244.129182 | 122.568229      |            |                  | 226.118617     | 113.562947       | V    | 1785.852323 | 893.429799      | 1768.825774 | 884.916525       | 1767.841758    | 884.424517       | 16 |
| 4 | 407.192511 | 204.099894      |            |                  | 389.181946     | 195.094611       | Y    | 1686.783909 | 843.895592      | 1669.757360 | 835.382318       | 1668.773344    | 834.890310       | 15 |
| 5 | 535.251089 | 268.129183      | 518.224540 | 259.615908       | 517.240524     | 259.123900       | Q    | 1523.720580 | 762.363928      | 1506.694031 | 753.850654       | 1505.710015    | 753.358645       | 14 |
| 6 | 672.310001 | 336.658639      | 655.283452 | 328.145364       | 654.299436     | 327.653356       | H    | 1395.662002 | 698.334639      | 1378.635453 | 689.821364       | 1377.651437    | 689.329356       | 13 |

|    |             |            |             |            |             |            |   |             |            |             |            |             |            |    |
|----|-------------|------------|-------------|------------|-------------|------------|---|-------------|------------|-------------|------------|-------------|------------|----|
| 7  | 771.378415  | 386.192846 | 754.351866  | 377.679571 | 753.367850  | 377.187563 | V | 1258.603090 | 629.805183 | 1241.576541 | 621.291908 | 1240.592525 | 620.799900 | 12 |
| 8  | 872.426094  | 436.716685 | 855.399545  | 428.203411 | 854.415529  | 427.711403 | T | 1159.534676 | 580.270976 | 1142.508127 | 571.757702 | 1141.524111 | 571.265694 | 11 |
| 9  | 929.447558  | 465.227417 | 912.421009  | 456.714143 | 911.436993  | 456.222135 | G | 1058.486997 | 529.747136 | 1041.460448 | 521.233862 | 1040.476432 | 520.741854 | 10 |
| 10 | 1058.490151 | 529.748714 | 1041.463602 | 521.235439 | 1040.479586 | 520.743431 | E | 1001.465533 | 501.236404 | 984.438984  | 492.723130 | 983.454968  | 492.231122 | 9  |
| 11 | 1189.530636 | 595.268956 | 1172.504087 | 586.755682 | 1171.520071 | 586.263674 | M | 872.422940  | 436.715108 | 855.396391  | 428.201833 |             |            | 8  |
| 12 | 1320.571121 | 660.789199 | 1303.544572 | 652.275924 | 1302.560556 | 651.783916 | M | 741.382455  | 371.194865 | 724.355906  | 362.681591 |             |            | 7  |
| 13 | 1377.592585 | 689.299931 | 1360.566036 | 680.786656 | 1359.582020 | 680.294648 | G | 610.341970  | 305.674623 | 593.315421  | 297.161348 |             |            | 6  |
| 14 | 1434.614049 | 717.810663 | 1417.587500 | 709.297388 | 1416.603484 | 708.805380 | G | 553.320506  | 277.163891 | 536.293957  | 268.650616 |             |            | 5  |
| 15 | 1571.672961 | 786.340119 | 1554.646412 | 777.826844 | 1553.662396 | 777.334836 | H | 496.299042  | 248.653159 | 479.272493  | 240.139884 |             |            | 4  |
| 16 | 1642.710075 | 821.858676 | 1625.683526 | 813.345401 | 1624.699510 | 812.853393 | A | 359.240130  | 180.123703 | 342.213581  | 171.610428 |             |            | 3  |
| 17 | 1755.794139 | 878.400707 | 1738.767590 | 869.887433 | 1737.783574 | 869.395425 | I | 288.203016  | 144.605146 | 271.176467  | 136.091871 |             |            | 2  |
| 18 |             |            |             |            |             |            | R | 175.118952  | 88.063114  | 158.092403  | 79.549839  |             |            | 1  |

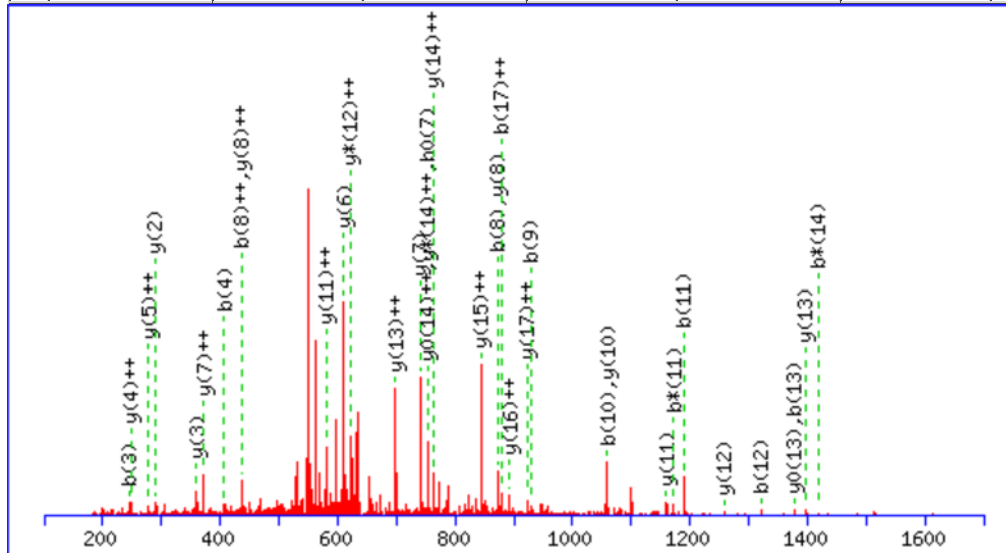

## Peptide View

MS/MS Fragmentation of **TDTCMSSNGLLCGR**

Found in **IP100220350**, Tax\_Id=9606 Gene\_Symbol=ITGB3 Isoform Beta-3B of Integrin beta-3

Experiment: 38 - OPC-2 Fraction: OPC-2

Match to Query 12206: 1657.686848 from(829.850700,2+)

Title: OECHL100312\_28.10528.10528.2.dta

Data file \\Boromir\masse\Data LTQ-Orbitrap\Chrystelle Lacroix\Etude clinique sJPU\OECHL100312\_28.raw

**Monoisotopic mass of neutral peptide Mr(calc):** 1657.685837**Fixed modifications:** Carbamidomethyl (C) (apply to specified residues or termini only)**Ions Score:** 54**Expect:** 8.3e-005**Matches :** 36/150 fragment ions using 67 most intense peaks ([help](#))

| #  | b           | b <sup>++</sup> | b*          | b <sup>+++</sup> | b <sup>0</sup> | b <sup>0++</sup> | Seq. | y           | y <sup>++</sup> | y*          | y <sup>+++</sup> | y <sup>0</sup> | y <sup>0++</sup> | #  |
|----|-------------|-----------------|-------------|------------------|----------------|------------------|------|-------------|-----------------|-------------|------------------|----------------|------------------|----|
| 1  | 102.054955  | 51.531116       |             |                  | 84.044390      | 42.525833        | T    |             |                 |             |                  |                |                  | 15 |
| 2  | 217.081898  | 109.044587      |             |                  | 199.071333     | 100.039304       | D    | 1557.645424 | 779.326350      | 1540.618875 | 770.813075       | 1539.634859    | 770.321067       | 14 |
| 3  | 318.129577  | 159.568426      |             |                  | 300.119012     | 150.563144       | T    | 1442.618481 | 721.812878      | 1425.591932 | 713.299604       | 1424.607916    | 712.807596       | 13 |
| 4  | 478.160226  | 239.583751      |             |                  | 460.149661     | 230.578469       | C    | 1341.570802 | 671.289039      | 1324.544253 | 662.775765       | 1323.560237    | 662.283756       | 12 |
| 5  | 609.200711  | 305.103994      |             |                  | 591.190146     | 296.098711       | M    | 1181.540153 | 591.273714      | 1164.513604 | 582.760440       | 1163.529588    | 582.268432       | 11 |
| 6  | 696.232739  | 348.620008      |             |                  | 678.222174     | 339.614725       | S    | 1050.499668 | 525.753472      | 1033.473119 | 517.240197       | 1032.489103    | 516.748189       | 10 |
| 7  | 783.264767  | 392.136022      |             |                  | 765.254202     | 383.130739       | S    | 963.467640  | 482.237458      | 946.441091  | 473.724183       | 945.457075     | 473.232175       | 9  |
| 8  | 897.307694  | 449.157485      | 880.281145  | 440.644210       | 879.297129     | 440.152202       | N    | 876.435612  | 438.721444      | 859.409063  | 430.208169       | 858.425047     | 429.716161       | 8  |
| 9  | 954.329158  | 477.668217      | 937.302609  | 469.154943       | 936.318593     | 468.662935       | G    | 762.392685  | 381.699980      | 745.366136  | 373.186706       | 744.382120     | 372.694698       | 7  |
| 10 | 1067.413222 | 534.210249      | 1050.386673 | 525.696975       | 1049.402657    | 525.204966       | L    | 705.371221  | 353.189248      | 688.344672  | 344.675974       | 687.360656     | 344.183966       | 6  |
| 11 | 1180.497286 | 590.752281      | 1163.470737 | 582.239006       | 1162.486721    | 581.746998       | L    | 592.287157  | 296.647217      | 575.260608  | 288.133942       | 574.276592     | 287.641934       | 5  |
| 12 | 1340.527935 | 670.767605      | 1323.501386 | 662.254331       | 1322.517370    | 661.762323       | C    | 479.203093  | 240.105184      | 462.176544  | 231.591910       | 461.192528     | 231.099902       | 4  |
| 13 | 1427.559963 | 714.283619      | 1410.533414 | 705.770345       | 1409.549398    | 705.278337       | S    | 319.172444  | 160.089860      | 302.145895  | 151.576585       | 301.161879     | 151.084577       | 3  |
| 14 | 1484.581427 | 742.794351      | 1467.554878 | 734.281077       | 1466.570862    | 733.789069       | G    | 232.140416  | 116.573846      | 215.113867  | 108.060571       |                |                  | 2  |
| 15 |             |                 |             |                  |                |                  | R    | 175.118952  | 88.063114       | 158.092403  | 79.549839        |                |                  | 1  |

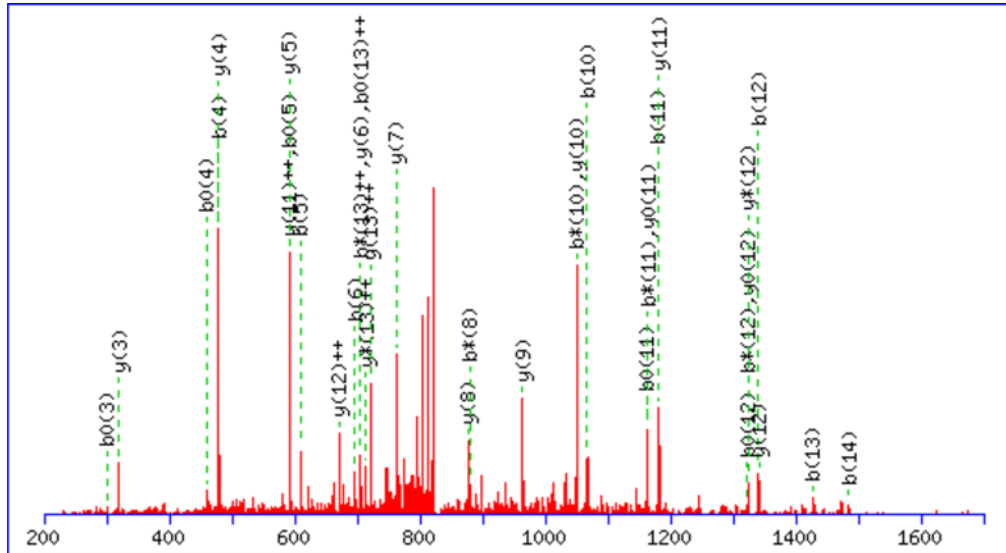

## Peptide View

MS/MS Fragmentation of **SDAAVDTSEITTK**

Found in **IPI00412977**, Tax\_Id=9606 Gene\_Symbol=- Prothymosin alpha

Experiment: 02 - S\_A-2 Fraction: S\_A-2

Match to Query 9337: 1465.682648 from(733.848600,2+)

Title: OECHL100312\_26.9169.9169.2.dta

Data file \\Boromir\masse\Data LTQ-Orbitrap\Chrystelle Lacroix\Etude clinique sJPU\OECHL100312\_26.raw

**Monoisotopic mass of neutral peptide Mr(calc):** 1465.678391 **Fixed modifications:** Carbamidomethyl (C) (apply to specified residues or termini only) **Variable modifications:** N-term : Acetyl (N-term) **Ions Score:** 77 **Expect:** 1.9e-006 **Matches :** 21/128 fragment ions using 24 most intense peaks ([help](#))

| # | b          | b <sup>++</sup> | b <sup>0</sup> | b <sup>0++</sup> | Seq. | y           | y <sup>++</sup> | y*          | y <sup>*++</sup> | y <sup>0</sup> | y <sup>0++</sup> | #  |
|---|------------|-----------------|----------------|------------------|------|-------------|-----------------|-------------|------------------|----------------|------------------|----|
| 1 | 130.049869 | 65.528572       | 112.039304     | 56.523290        | S    |             |                 |             |                  |                |                  | 14 |
| 2 | 245.076812 | 123.042044      | 227.066247     | 114.036761       | D    | 1337.643082 | 669.325179      | 1320.616533 | 660.811905       | 1319.632517    | 660.319897       | 13 |
| 3 | 316.113926 | 158.560601      | 298.103361     | 149.555319       | A    | 1222.616139 | 611.811708      | 1205.589590 | 603.298433       | 1204.605574    | 602.806425       | 12 |
| 4 | 387.151040 | 194.079158      | 369.140475     | 185.073875       | A    | 1151.579025 | 576.293151      | 1134.552476 | 567.779876       | 1133.568460    | 567.287868       | 11 |
| 5 | 486.219454 | 243.613365      | 468.208889     | 234.608082       | V    | 1080.541911 | 540.774594      | 1063.515362 | 532.261319       | 1062.531346    | 531.769311       | 10 |
| 6 | 601.246397 | 301.126837      | 583.235832     | 292.121554       | D    | 981.473497  | 491.240387      | 964.446948  | 482.727112       | 963.462932     | 482.235104       | 9  |

|    |                    |            |                    |                   |   |                   |            |            |            |            |            |   |
|----|--------------------|------------|--------------------|-------------------|---|-------------------|------------|------------|------------|------------|------------|---|
| 7  | <b>702.294076</b>  | 351.650676 | 684.283511         | 342.645394        | T | <b>866.446554</b> | 433.726915 | 849.420005 | 425.213641 | 848.435989 | 424.721633 | 8 |
| 8  | 789.326104         | 395.166690 | 771.315539         | 386.161408        | S | 765.398875        | 383.203076 | 748.372326 | 374.689801 | 747.388310 | 374.197793 | 7 |
| 9  | 876.358132         | 438.682704 | <b>858.347567</b>  | 429.677421        | S | <b>678.366847</b> | 339.687062 | 661.340298 | 331.173787 | 660.356282 | 330.681779 | 6 |
| 10 | 1005.400725        | 503.204001 | <b>987.390160</b>  | 494.198718        | E | <b>591.334819</b> | 296.171048 | 574.308270 | 287.657773 | 573.324254 | 287.165765 | 5 |
| 11 | <b>1118.484789</b> | 559.746033 | 1100.474224        | 550.740750        | I | <b>462.292226</b> | 231.649751 | 445.265677 | 223.136477 | 444.281661 | 222.644469 | 4 |
| 12 | <b>1219.532468</b> | 610.269872 | 1201.521903        | <b>601.264590</b> | T | <b>349.208162</b> | 175.107719 | 332.181613 | 166.594445 | 331.197597 | 166.102437 | 3 |
| 13 | <b>1320.580147</b> | 660.793712 | <b>1302.569582</b> | 651.788429        | T | <b>248.160483</b> | 124.583879 | 231.133934 | 116.070605 | 230.149918 | 115.578597 | 2 |
| 14 |                    |            |                    |                   | K | 147.112804        | 74.060040  | 130.086255 | 65.546765  |            |            | 1 |

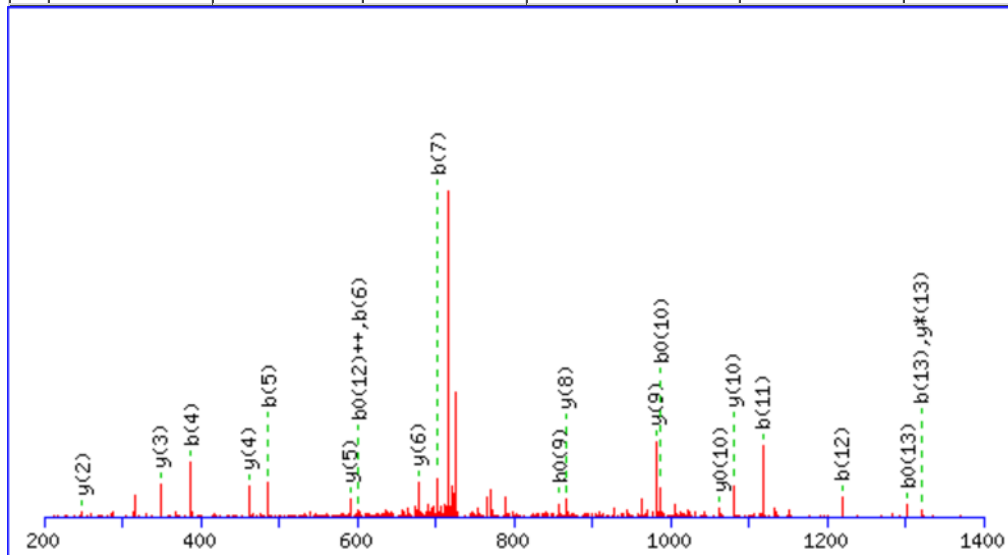

## Peptide View

MS/MS Fragmentation of **AQLDSADIPK**

Found in **IPI00026303**, Tax\_Id=9606 Gene\_Symbol=PI15 Peptidase inhibitor 15

**Experiment:** 02 - S\_A-2 **Fraction:** S\_A-2

Match to Query 4043: 1056.545048 from(529.279800,2+)

Title: OECHL100312\_26.8885.8885.2.dta

Data file \\Boromir\masse\Data LTQ-Orbitrap\Chrystelle Lacroix\Etude clinique sJPU\OECHL100312\_26.raw

**Monoisotopic mass of neutral peptide Mr(calc):** 1056.545120 **Fixed modifications:** Carbamidomethyl (C) (apply to specified residues or termini only) **Ions Score:** 54



**Expect:** 0.00041**Matches :** 17/94 fragment ions using 36 most intense peaks ([help](#))

| #  | b                 | b <sup>++</sup> | b*                | b <sup>*++</sup> | b <sup>0</sup>    | b <sup>0++</sup> | Seq. | y                 | y <sup>++</sup> | y*                | y <sup>*++</sup> | y <sup>0</sup> | y <sup>0++</sup> | #  |
|----|-------------------|-----------------|-------------------|------------------|-------------------|------------------|------|-------------------|-----------------|-------------------|------------------|----------------|------------------|----|
| 1  | 72.044390         | 36.525833       |                   |                  |                   |                  | A    |                   |                 |                   |                  |                |                  | 10 |
| 2  | <b>200.102968</b> | 100.555122      | <b>183.076419</b> | 92.041848        |                   |                  | Q    | 986.515302        | 493.761289      | <b>969.488753</b> | 485.248015       | 968.504737     | 484.756007       | 9  |
| 3  | <b>313.187032</b> | 157.097154      | 296.160483        | 148.583879       |                   |                  | L    | <b>858.456724</b> | 429.732000      | 841.430175        | 421.218726       | 840.446159     | 420.726718       | 8  |
| 4  | <b>428.213975</b> | 214.610626      | 411.187426        | 206.097351       | 410.203410        | 205.605343       | D    | <b>745.372660</b> | 373.189968      | 728.346111        | 364.676694       | 727.362095     | 364.184686       | 7  |
| 5  | <b>515.246003</b> | 258.126640      | 498.219454        | 249.613365       | 497.235438        | 249.121357       | S    | <b>630.345717</b> | 315.676497      | 613.319168        | 307.163222       | 612.335152     | 306.671214       | 6  |
| 6  | <b>586.283117</b> | 293.645197      | 569.256568        | 285.131922       | 568.272552        | 284.639914       | A    | 543.313689        | 272.160483      | 526.287140        | 263.647208       | 525.303124     | 263.155200       | 5  |
| 7  | <b>701.310060</b> | 351.158668      | 684.283511        | 342.645394       | 683.299495        | 342.153386       | D    | 472.276575        | 236.641926      | 455.250026        | 228.128651       | 454.266010     | 227.636643       | 4  |
| 8  | <b>814.394124</b> | 407.700700      | <b>797.367575</b> | 399.187426       | <b>796.383559</b> | 398.695418       | I    | <b>357.249632</b> | 179.128454      | 340.223083        | 170.615180       |                |                  | 3  |
| 9  | <b>911.446888</b> | 456.227082      | 894.420339        | 447.713808       | 893.436323        | 447.221800       | P    | <b>244.165568</b> | 122.586422      | 227.139019        | 114.073148       |                |                  | 2  |
| 10 |                   |                 |                   |                  |                   |                  | K    | 147.112804        | 74.060040       | 130.086255        | 65.546766        |                |                  | 1  |

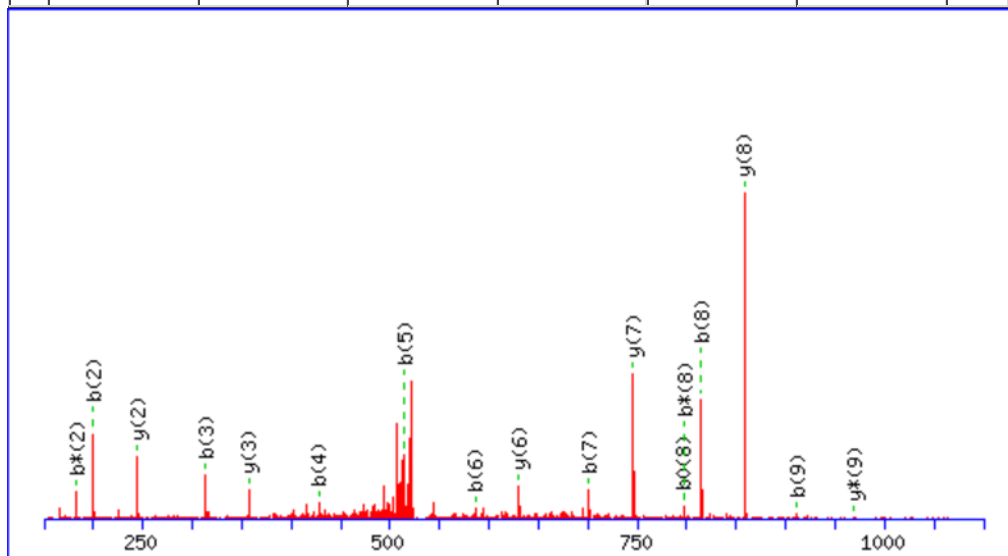

## Peptide View

MS/MS Fragmentation of **AHSDGGDGVVSQVK**

Found in **IPI00029751**, Tax\_Id=9606 Gene\_Symbol=CNTN1 Isoform 1 of Contactin-1

**Experiment:** 02 - S\_A-2 **Fraction:** S\_A-2

Match to Query 8310: 1354.650048 from(678.332300,2+)

Title: OECHL100312\_26.3922.3922.2.dta

Data file \\Boromir\masse\Data LTQ-Orbitrap\Chrystelle Lacroix\Etude clinique sJPU\OECHL100312\_26.raw

**Monoisotopic mass of neutral peptide Mr(calc):** 1354.647736**Fixed modifications:** Carbamidomethyl (C) (apply to specified residues or termini only)**Ions Score:** 52**Expect:** 0.00057**Matches :** 10/124 fragment ions using 12 most intense peaks ([help](#))

| #  | b                  | b <sup>++</sup> | b*          | b <sup>*++</sup> | b <sup>0</sup> | b <sup>0++</sup> | Seq. | y                  | y <sup>++</sup> | y*          | y <sup>*++</sup> | y <sup>0</sup> | y <sup>0++</sup> | #  |
|----|--------------------|-----------------|-------------|------------------|----------------|------------------|------|--------------------|-----------------|-------------|------------------|----------------|------------------|----|
| 1  | 72.044390          | 36.525833       |             |                  |                |                  | A    |                    |                 |             |                  |                |                  | 14 |
| 2  | <b>209.103302</b>  | 105.055289      |             |                  |                |                  | H    | 1284.617870        | 642.812573      | 1267.591321 | 634.299299       | 1266.607305    | 633.807291       | 13 |
| 3  | <b>296.135330</b>  | 148.571303      |             |                  | 278.124765     | 139.566021       | S    | <b>1147.558958</b> | 574.283117      | 1130.532409 | 565.769843       | 1129.548393    | 565.277835       | 12 |
| 4  | 411.162273         | 206.084775      |             |                  | 393.151708     | 197.079492       | D    | <b>1060.526930</b> | 530.767103      | 1043.500381 | 522.253829       | 1042.516365    | 521.761821       | 11 |
| 5  | 468.183737         | 234.595507      |             |                  | 450.173172     | 225.590224       | G    | <b>945.499987</b>  | 473.253632      | 928.473438  | 464.740357       | 927.489422     | 464.248349       | 10 |
| 6  | 525.205201         | 263.106239      |             |                  | 507.194636     | 254.100956       | G    | 888.478523         | 444.742900      | 871.451974  | 436.229625       | 870.467958     | 435.737617       | 9  |
| 7  | 640.232144         | 320.619710      |             |                  | 622.221579     | 311.614428       | D    | 831.457059         | 416.232168      | 814.430510  | 407.718893       | 813.446494     | 407.226885       | 8  |
| 8  | 697.253608         | 349.130442      |             |                  | 679.243043     | 340.125160       | G    | <b>716.430116</b>  | 358.718696      | 699.403567  | 350.205422       | 698.419551     | 349.713414       | 7  |
| 9  | <b>796.322022</b>  | 398.664649      |             |                  | 778.311457     | 389.659367       | V    | 659.408652         | 330.207964      | 642.382103  | 321.694690       | 641.398087     | 321.202682       | 6  |
| 10 | 895.390436         | 448.198856      |             |                  | 877.379871     | 439.193574       | V    | <b>560.340238</b>  | 280.673757      | 543.313689  | 272.160483       | 542.329673     | 271.668475       | 5  |
| 11 | 982.422464         | 491.714870      |             |                  | 964.411899     | 482.709588       | S    | <b>461.271824</b>  | 231.139550      | 444.245275  | 222.626276       | 443.261259     | 222.134268       | 4  |
| 12 | 1110.481042        | 555.744159      | 1093.454493 | 547.230885       | 1092.470477    | 546.738877       | Q    | 374.239796         | 187.623536      | 357.213247  | 179.110262       |                |                  | 3  |
| 13 | <b>1209.549456</b> | 605.278366      | 1192.522907 | 596.765092       | 1191.538891    | 596.273084       | V    | 246.181218         | 123.594247      | 229.154669  | 115.080973       |                |                  | 2  |
| 14 |                    |                 |             |                  |                |                  | K    | 147.112804         | 74.060040       | 130.086255  | 65.546765        |                |                  | 1  |

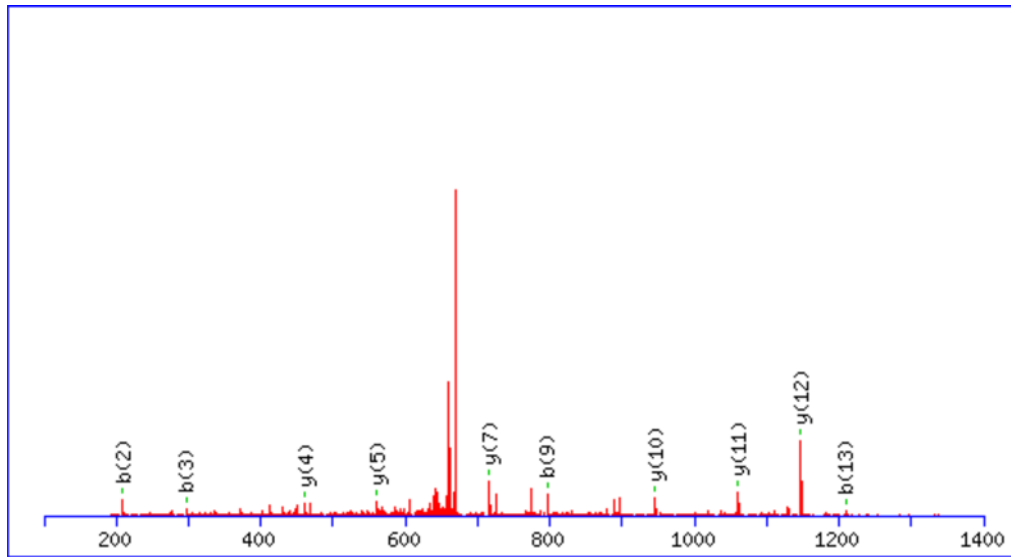

## Peptide View

MS/MS Fragmentation of **AADHDVGSSELPPEGVLGALLR**

Found in **IP100002280**, Tax\_Id=9606 Gene\_Symbol=PCSK1N ProSAAS

**Experiment:** 36 - OPB-3 **Fraction:** OPB-3

Match to Query 16025: 2115.095448 from(1058.555000,2+)

Title: OECHL100317\_19.21876.21876.2.dta

Data file \\Boromir\masse\Data LTQ-Orbitrap\Chrystelle Lacroix\Etude clinique sJPU\OECHL100317\_19.raw

**Monoisotopic mass of neutral peptide Mr(calc):** 2115.096024**Fixed modifications:** Carbamidomethyl (C) (apply to specified residues or termini only)**Ions Score:** 83

**Expect:** 5.9e-007**Matches :** 33/180 fragment ions using 50 most intense peaks ([help](#))

| #  | b                  | b <sup>++</sup> | b <sup>0</sup>     | b <sup>0++</sup> | Seq. | y                  | y <sup>++</sup> | y*          | y* <sup>++</sup>  | y <sup>0</sup>     | y <sup>0++</sup>  | #  |
|----|--------------------|-----------------|--------------------|------------------|------|--------------------|-----------------|-------------|-------------------|--------------------|-------------------|----|
| 1  | 72.044390          | 36.525833       |                    |                  | A    |                    |                 |             |                   |                    |                   | 21 |
| 2  | 143.081504         | 72.044390       |                    |                  | A    | 2045.066196        | 1023.036736     | 2028.039647 | 1014.523461       | 2027.055631        | 1014.031453       | 20 |
| 3  | 258.108447         | 129.557862      | 240.097882         | 120.552579       | D    | 1974.029082        | 987.518179      | 1957.002533 | 979.004904        | 1956.018517        | 978.512896        | 19 |
| 4  | <b>395.167359</b>  | 198.087317      | 377.156794         | 189.082035       | H    | 1859.002139        | 930.004707      | 1841.975590 | 921.491433        | 1840.991574        | 920.999425        | 18 |
| 5  | <b>510.194302</b>  | 255.600789      | <b>492.183737</b>  | 246.595507       | D    | <b>1721.943227</b> | 861.475251      | 1704.916678 | 852.961977        | <b>1703.932662</b> | 852.469969        | 17 |
| 6  | <b>609.262716</b>  | 305.134996      | <b>591.252151</b>  | 296.129714       | V    | <b>1606.916284</b> | 803.961780      | 1589.889735 | 795.448505        | 1588.905719        | 794.956497        | 16 |
| 7  | <b>666.284180</b>  | 333.645728      | 648.273615         | 324.640446       | G    | <b>1507.847870</b> | 754.427573      | 1490.821321 | 745.914298        | 1489.837305        | 745.422290        | 15 |
| 8  | <b>753.316208</b>  | 377.161742      | <b>735.305643</b>  | 368.156460       | S    | <b>1450.826406</b> | 725.916841      | 1433.799857 | 717.403566        | 1432.815841        | 716.911558        | 14 |
| 9  | <b>882.358801</b>  | 441.683039      | <b>864.348236</b>  | 432.677756       | E    | <b>1363.794378</b> | 682.400827      | 1346.767829 | 673.887552        | 1345.783813        | 673.395544        | 13 |
| 10 | <b>995.442865</b>  | 498.225071      | <b>977.432300</b>  | 489.219788       | L    | <b>1234.751785</b> | 617.879530      | 1217.725236 | <b>609.366256</b> | <b>1216.741220</b> | <b>608.874248</b> | 12 |
| 11 | 1092.495629        | 546.751453      | 1074.485064        | 537.746170       | P    | <b>1121.667721</b> | 561.337498      | 1104.641172 | 552.824224        | 1103.657156        | 552.332216        | 11 |
| 12 | 1189.548393        | 595.277835      | 1171.537828        | 586.272552       | P    | 1024.614957        | 512.811116      | 1007.588408 | 504.297842        | 1006.604392        | 503.805834        | 10 |
| 13 | <b>1318.590986</b> | 659.799131      | 1300.580421        | 650.793848       | E    | 927.562193         | 464.284734      | 910.535644  | 455.771460        | 909.551628         | 455.279452        | 9  |
| 14 | <b>1375.612450</b> | 688.309863      | 1357.601885        | 679.304580       | G    | <b>798.519600</b>  | 399.763438      | 781.493051  | 391.250163        |                    |                   | 8  |
| 15 | 1474.680864        | 737.844070      | 1456.670299        | 728.838787       | V    | 741.498136         | 371.252706      | 724.471587  | 362.739431        |                    |                   | 7  |
| 16 | <b>1587.764928</b> | 794.386102      | 1569.754363        | 785.380819       | L    | <b>642.429722</b>  | 321.718499      | 625.403173  | 313.205224        |                    |                   | 6  |
| 17 | 1644.786392        | 822.896834      | 1626.775827        | 813.891551       | G    | <b>529.345658</b>  | 265.176467      | 512.319109  | 256.663192        |                    |                   | 5  |
| 18 | 1715.823506        | 858.415391      | 1697.812941        | 849.410108       | A    | 472.324194         | 236.665735      | 455.297645  | 228.152460        |                    |                   | 4  |
| 19 | <b>1828.907570</b> | 914.957423      | <b>1810.897005</b> | 905.952140       | L    | <b>401.287080</b>  | 201.147178      | 384.260531  | 192.633903        |                    |                   | 3  |
| 20 | <b>1941.991634</b> | 971.499455      | 1923.981069        | 962.494172       | L    | 288.203016         | 144.605146      | 271.176467  | 136.091872        |                    |                   | 2  |
| 21 |                    |                 |                    |                  | R    | 175.118952         | 88.063114       | 158.092403  | 79.549840         |                    |                   | 1  |

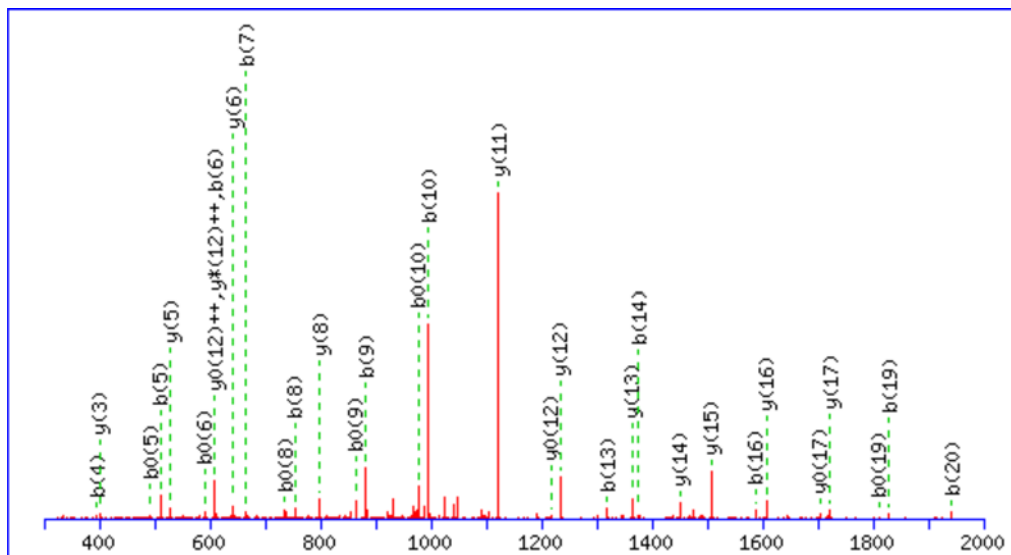

## Peptide View

MS/MS Fragmentation of **KAGPCEQAGSPCR**

Found in **IP100028381**, Tax\_Id=9606 Gene\_Symbol=DLK2 Isoform 1 of Protein delta homolog 2

**Experiment:** 36 - OPB-3 **Fraction:** OPB-3

Match to Query 9453: 1416.625048 from(709.319800,2+)

Title: OECHL100317\_19.2437.2437.2.dta

Data file \\Boromir\masse\Data LTQ-Orbitrap\Chrystelle Lacroix\Etude clinique sJPU\OECHL100317\_19.raw

**Monoisotopic mass of neutral peptide Mr(calc):** 1416.623810 **Fixed modifications:** Carbamidomethyl (C) (apply to specified residues or termini only) **Ions Score:** 67

**Expect:** 1.4e-005 **Matches :** 30/128 fragment ions using 62 most intense peaks ([help](#))

| # | b                 | b <sup>++</sup> | b <sup>*</sup>    | b <sup>*++</sup> | b <sup>0</sup> | b <sup>0++</sup> | Seq.     | y                  | y <sup>++</sup>   | y <sup>*</sup>     | y <sup>*++</sup>  | y <sup>0</sup>    | y <sup>0++</sup>  | #         |
|---|-------------------|-----------------|-------------------|------------------|----------------|------------------|----------|--------------------|-------------------|--------------------|-------------------|-------------------|-------------------|-----------|
| 1 | 129.102239        | 65.054757       | 112.075690        | 56.541483        |                |                  | <b>K</b> |                    |                   |                    |                   |                   |                   | <b>13</b> |
| 2 | 200.139353        | 100.573315      | 183.112804        | 92.060040        |                |                  | <b>A</b> | <b>1289.536133</b> | <b>645.271705</b> | 1272.509584        | 636.758430        | 1271.525568       | 636.266422        | <b>12</b> |
| 3 | <b>257.160817</b> | 129.084047      | <b>240.134268</b> | 120.570772       |                |                  | <b>G</b> | <b>1218.499019</b> | <b>609.753148</b> | 1201.472470        | 601.239873        | 1200.488454       | 600.747865        | <b>11</b> |
| 4 | 354.213581        | 177.610429      | 337.187032        | 169.097154       |                |                  | <b>P</b> | <b>1161.477555</b> | <b>581.242416</b> | 1144.451006        | <b>572.729141</b> | 1143.466990       | <b>572.237133</b> | <b>10</b> |
| 5 | 514.244230        | 257.625753      | 497.217681        | 249.112479       |                |                  | <b>C</b> | <b>1064.424791</b> | 532.716034        | <b>1047.398242</b> | 524.202759        | 1046.414226       | 523.710751        | <b>9</b>  |
| 6 | 643.286823        | 322.147050      | 626.260274        | 313.633775       | 625.276258     | 313.141767       | <b>E</b> | <b>904.394142</b>  | 452.700709        | 887.367593         | <b>444.187434</b> | <b>886.383577</b> | 443.695427        | <b>8</b>  |

|    |             |            |             |            |             |            |   |            |            |            |            |            |            |   |
|----|-------------|------------|-------------|------------|-------------|------------|---|------------|------------|------------|------------|------------|------------|---|
| 7  | 771.345401  | 386.176339 | 754.318852  | 377.663064 | 753.334836  | 377.171056 | Q | 775.351549 | 388.179413 | 758.325000 | 379.666138 | 757.340984 | 379.174130 | 7 |
| 8  | 842.382515  | 421.694896 | 825.355966  | 413.181621 | 824.371950  | 412.689613 | A | 647.292971 | 324.150124 | 630.266422 | 315.636849 | 629.282406 | 315.144841 | 6 |
| 9  | 899.403979  | 450.205628 | 882.377430  | 441.692353 | 881.393414  | 441.200345 | G | 576.255857 | 288.631567 | 559.229308 | 280.118292 | 558.245292 | 279.626284 | 5 |
| 10 | 986.436007  | 493.721642 | 969.409458  | 485.208367 | 968.425442  | 484.716359 | S | 519.234393 | 260.120835 | 502.207844 | 251.607560 | 501.223828 | 251.115552 | 4 |
| 11 | 1083.488771 | 542.248024 | 1066.462222 | 533.734749 | 1065.478206 | 533.242741 | P | 432.202365 | 216.604820 | 415.175816 | 208.091546 |            |            | 3 |
| 12 | 1243.519420 | 622.263348 | 1226.492871 | 613.750074 | 1225.508855 | 613.258066 | C | 335.149601 | 168.078438 | 318.123052 | 159.565164 |            |            | 2 |
| 13 |             |            |             |            |             |            | R | 175.118952 | 88.063114  | 158.092403 | 79.549839  |            |            | 1 |

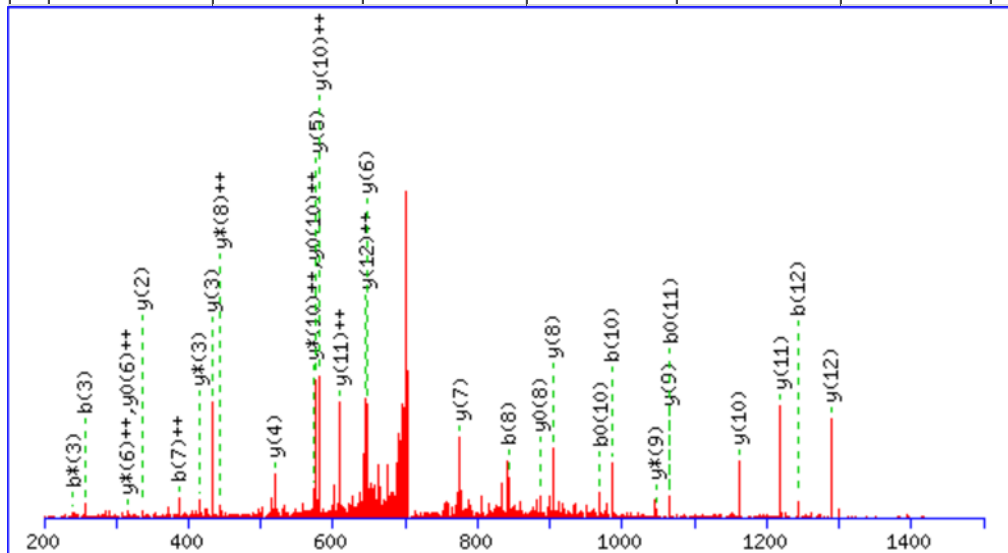

## Peptide View

MS/MS Fragmentation of **NPVLQQDAHSSVTITPQR**

Found in **IPI00410488**, Tax\_Id=9606 Gene\_Symbol=CD276 Isoform 1 of CD276 antigen

**Experiment:** 36 - OPB-3 **Fraction:** OPB-3

Match to Query 15157: 1990.025448 from(996.020000,2+)

Title: OECHL100317\_19.10615.10615.2.dta

Data file \\Boromir\masse\Data LTQ-Orbitrap\Chrystelle Lacroix\Etude clinique sJPU\OECHL100317\_19.raw

**Monoisotopic mass of neutral peptide Mr(calc):** 1990.023209 **Fixed modifications:** Carbamidomethyl (C) (apply to specified residues or termini only) **Ions Score:** 75

**Expect:** 3.9e-006 **Matches :** 38/186 fragment ions using 65 most intense peaks ([help](#))

| #         | <b>b</b>           | <b>b<sup>++</sup></b> | <b>b*</b>          | <b>b<sup>*++</sup></b> | <b>b<sup>0</sup></b> | <b>b<sup>0++</sup></b> | Seq.     | <b>y</b>           | <b>y<sup>++</sup></b> | <b>y*</b>         | <b>y<sup>*++</sup></b> | <b>y<sup>0</sup></b> | <b>y<sup>0++</sup></b> | #         |
|-----------|--------------------|-----------------------|--------------------|------------------------|----------------------|------------------------|----------|--------------------|-----------------------|-------------------|------------------------|----------------------|------------------------|-----------|
| <b>1</b>  | 115.050203         | 58.028740             | 98.023654          | 49.515465              |                      |                        | <b>N</b> |                    |                       |                   |                        |                      |                        | <b>18</b> |
| <b>2</b>  | 212.102967         | 106.555121            | 195.076418         | 98.041847              |                      |                        | <b>P</b> | 1876.987553        | <b>938.997415</b>     | 1859.961004       | 930.484140             | 1858.976988          | 929.992132             | <b>17</b> |
| <b>3</b>  | <b>311.171381</b>  | 156.089328            | 294.144832         | 147.576054             |                      |                        | <b>V</b> | <b>1779.934789</b> | <b>890.471033</b>     | 1762.908240       | 881.957758             | 1761.924224          | 881.465750             | <b>16</b> |
| <b>4</b>  | <b>424.255445</b>  | 212.631361            | <b>407.228896</b>  | 204.118086             |                      |                        | <b>L</b> | <b>1680.866375</b> | <b>840.936826</b>     | 1663.839826       | 832.423551             | 1662.855810          | 831.931543             | <b>15</b> |
| <b>5</b>  | <b>552.314023</b>  | 276.660650            | <b>535.287474</b>  | 268.147375             |                      |                        | <b>Q</b> | 1567.782311        | 784.394794            | 1550.755762       | <b>775.881519</b>      | 1549.771746          | <b>775.389511</b>      | <b>14</b> |
| <b>6</b>  | <b>680.372601</b>  | 340.689939            | 663.346052         | 332.176664             |                      |                        | <b>Q</b> | <b>1439.723733</b> | 720.365505            | 1422.697184       | 711.852230             | 1421.713168          | 711.360222             | <b>13</b> |
| <b>7</b>  | <b>795.399544</b>  | 398.203410            | 778.372995         | 389.690136             | 777.388979           | 389.198128             | <b>D</b> | <b>1311.665155</b> | 656.336215            | 1294.638606       | 647.822941             | 1293.654590          | 647.330933             | <b>12</b> |
| <b>8</b>  | <b>866.436658</b>  | 433.721967            | 849.410109         | 425.208693             | 848.426093           | <b>424.716685</b>      | <b>A</b> | <b>1196.638212</b> | 598.822744            | 1179.611663       | 590.309470             | 1178.627647          | 589.817462             | <b>11</b> |
| <b>9</b>  | 1003.495570        | <b>502.251423</b>     | 986.469021         | 493.738149             | 985.485005           | 493.246141             | <b>H</b> | <b>1125.601098</b> | 563.304187            | 1108.574549       | 554.790913             | 1107.590533          | 554.298905             | <b>10</b> |
| <b>10</b> | <b>1090.527598</b> | 545.767437            | 1073.501049        | 537.254163             | 1072.517033          | 536.762155             | <b>S</b> | <b>988.542186</b>  | 494.774731            | 971.515637        | 486.261457             | 970.531621           | 485.769449             | <b>9</b>  |
| <b>11</b> | 1177.559626        | 589.283451            | 1160.533077        | 580.770177             | 1159.549061          | 580.278169             | <b>S</b> | <b>901.510158</b>  | 451.258717            | 884.483609        | 442.745443             | 883.499593           | 442.253435             | <b>8</b>  |
| <b>12</b> | <b>1276.628040</b> | 638.817658            | 1259.601491        | 630.304384             | 1258.617475          | 629.812376             | <b>V</b> | 814.478130         | 407.742703            | 797.451581        | 399.229428             | 796.467565           | 398.737420             | <b>7</b>  |
| <b>13</b> | 1377.675719        | 689.341498            | 1360.649170        | <b>680.828223</b>      | 1359.665154          | <b>680.336215</b>      | <b>T</b> | <b>715.409716</b>  | 358.208496            | 698.383167        | 349.695221             | 697.399151           | 349.203213             | <b>6</b>  |
| <b>14</b> | <b>1490.759783</b> | 745.883530            | <b>1473.733234</b> | 737.370255             | <b>1472.749218</b>   | 736.878247             | <b>I</b> | <b>614.362037</b>  | 307.684656            | 597.335488        | 299.171382             | 596.351472           | 298.679374             | <b>5</b>  |
| <b>15</b> | <b>1591.807462</b> | 796.407369            | <b>1574.780913</b> | 787.894095             | 1573.796897          | 787.402087             | <b>T</b> | <b>501.277973</b>  | 251.142624            | 484.251424        | 242.629350             | 483.267408           | 242.137342             | <b>4</b>  |
| <b>16</b> | 1688.860226        | 844.933751            | 1671.833677        | 836.420477             | 1670.849661          | 835.928469             | <b>P</b> | <b>400.230294</b>  | 200.618785            | <b>383.203745</b> | 192.105510             |                      |                        | <b>3</b>  |
| <b>17</b> | <b>1816.918804</b> | 908.963040            | 1799.892255        | 900.449766             | 1798.908239          | 899.957758             | <b>Q</b> | 303.177530         | 152.092403            | 286.150981        | 143.579128             |                      |                        | <b>2</b>  |
| <b>18</b> |                    |                       |                    |                        |                      |                        | <b>R</b> | 175.118952         | 88.063114             | 158.092403        | 79.549839              |                      |                        | <b>1</b>  |

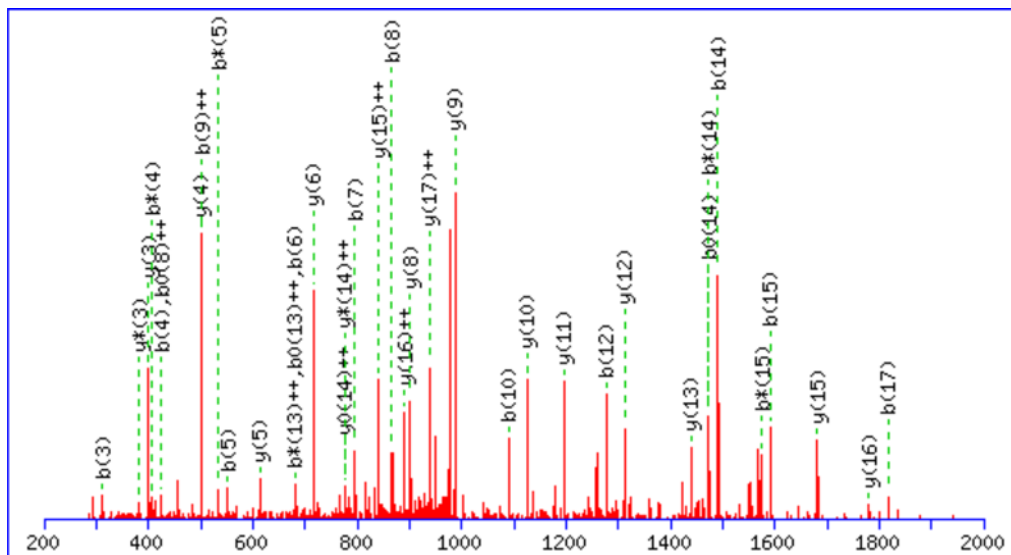

## Peptide View

MS/MS Fragmentation of **HSFKGEECPAGSHR**

Found in **IP100021970**, Tax\_Id=9606 Gene\_Symbol=MGC31957;TNFRSF10C TNFRSF10C protein

**Experiment:** 36 - OPB-3 **Fraction:** OPB-3

Match to Query 11261: 1597.705448 from(799.860000,2+)

Title: OECHL100317\_19.2599.2599.2.dta

Data file \\Boromir\masse\Data LTQ-Orbitrap\Chrystelle Lacroix\Etude clinique sJPU\OECHL100317\_19.raw

**Monoisotopic mass of neutral peptide Mr(calc):** 1597.705566 **Fixed modifications:** Carbamidomethyl (C) (apply to specified residues or termini only) **Ions Score:** 64

**Expect:** 2.3e-005 **Matches :** 32/144 fragment ions using 56 most intense peaks ([help](#))

| # | b                 | b <sup>++</sup> | b <sup>*</sup> | b <sup>*++</sup> | b <sup>0</sup>    | b <sup>0++</sup> | Seq.     | y                  | y <sup>++</sup>   | y <sup>*</sup> | y <sup>*++</sup>  | y <sup>0</sup> | y <sup>0++</sup>  | #         |
|---|-------------------|-----------------|----------------|------------------|-------------------|------------------|----------|--------------------|-------------------|----------------|-------------------|----------------|-------------------|-----------|
| 1 | 138.066188        | 69.536732       |                |                  |                   |                  | <b>H</b> |                    |                   |                |                   |                |                   | <b>14</b> |
| 2 | <b>225.098216</b> | 113.052746      |                |                  | 207.087651        | 104.047463       | <b>S</b> | <b>1461.653938</b> | <b>731.330607</b> | 1444.627389    | <b>722.817333</b> | 1443.643373    | <b>722.325325</b> | <b>13</b> |
| 3 | <b>372.166630</b> | 186.586953      |                |                  | <b>354.156065</b> | 177.581671       | <b>F</b> | <b>1374.621910</b> | <b>687.814593</b> | 1357.595361    | 679.301319        | 1356.611345    | 678.809311        | <b>12</b> |
| 4 | <b>500.261593</b> | 250.634435      | 483.235044     | 242.121160       | <b>482.251028</b> | 241.629152       | <b>K</b> | <b>1227.553496</b> | <b>614.280386</b> | 1210.526947    | 605.767112        | 1209.542931    | 605.275104        | <b>11</b> |
| 5 | 557.283057        | 279.145167      | 540.256508     | 270.631892       | <b>539.272492</b> | 270.139884       | <b>G</b> | <b>1099.458533</b> | 550.232905        | 1082.431984    | 541.719630        | 1081.447968    | 541.227622        | <b>10</b> |
| 6 | <b>686.325650</b> | 343.666463      | 669.299101     | 335.153189       | 668.315085        | 334.661181       | <b>E</b> | 1042.437069        | 521.722173        | 1025.410520    | 513.208898        | 1024.426504    | 512.716890        | <b>9</b>  |



|    |                    |            |                    |            |                    |                   |   |                   |                   |            |            |            |            |   |
|----|--------------------|------------|--------------------|------------|--------------------|-------------------|---|-------------------|-------------------|------------|------------|------------|------------|---|
| 7  | 815.368243         | 408.187760 | 798.341694         | 399.674485 | 797.357678         | 399.182477        | E | <b>913.394476</b> | 457.200876        | 896.367927 | 448.687602 | 895.383911 | 448.195594 | 8 |
| 8  | <b>975.398892</b>  | 488.203084 | 958.372343         | 479.689810 | 957.388327         | 479.197802        | C | <b>784.351883</b> | 392.679580        | 767.325334 | 384.166305 | 766.341318 | 383.674297 | 7 |
| 9  | 1072.451656        | 536.729466 | 1055.425107        | 528.216192 | 1054.441091        | <b>527.724184</b> | P | <b>624.321234</b> | <b>312.664255</b> | 607.294685 | 304.150981 | 606.310669 | 303.658973 | 6 |
| 10 | <b>1143.488770</b> | 572.248023 | 1126.462221        | 563.734749 | <b>1125.478205</b> | 563.242741        | A | <b>527.268470</b> | 264.137873        | 510.241921 | 255.624598 | 509.257905 | 255.132590 | 5 |
| 11 | <b>1200.510234</b> | 600.758755 | 1183.483685        | 592.245481 | 1182.499669        | 591.753473        | G | <b>456.231356</b> | 228.619316        | 439.204807 | 220.106041 | 438.220791 | 219.614033 | 4 |
| 12 | <b>1287.542262</b> | 644.274769 | 1270.515713        | 635.761495 | <b>1269.531697</b> | 635.269487        | S | 399.209892        | 200.108584        | 382.183343 | 191.595309 | 381.199327 | 191.103301 | 3 |
| 13 | <b>1424.601174</b> | 712.804225 | <b>1407.574625</b> | 704.290951 | 1406.590609        | 703.798943        | H | <b>312.177864</b> | 156.592570        | 295.151315 | 148.079295 |            |            | 2 |
| 14 |                    |            |                    |            |                    |                   | R | 175.118952        | 88.063114         | 158.092403 | 79.549839  |            |            | 1 |

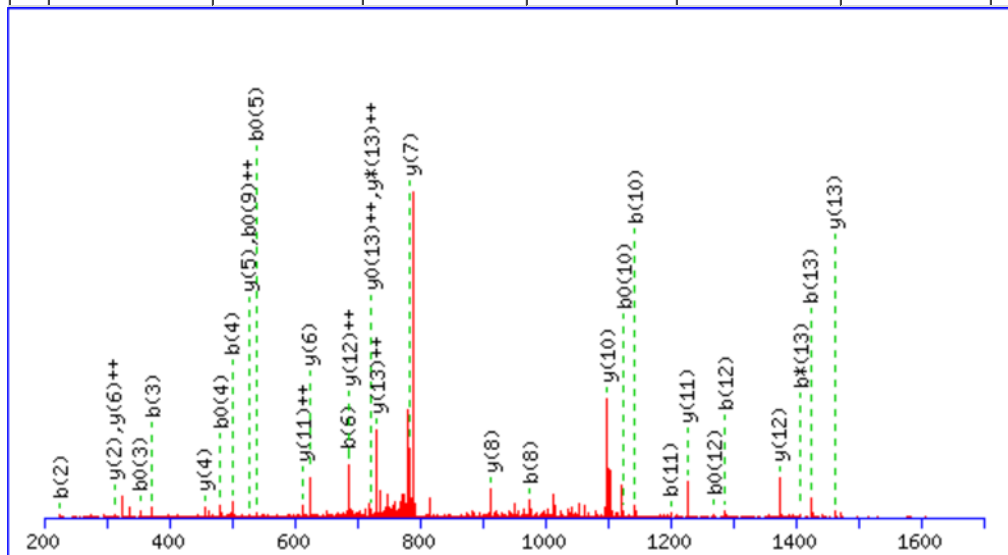

## Peptide View

MS/MS Fragmentation of **AVGLLTVISK**

Found in **IPI00013446**, Tax\_Id=9606 Gene\_Symbol=PSCA Prostate stem cell antigen

**Experiment:** 36 - OPB-3 **Fraction:** OPB-3

Match to Query 4027: 999.633048 from(500.823800,2+)

Title: OECHL100317\_19.18069.18069.2.dta

Data file \\Boromir\masse\Data LTQ-Orbitrap\Chrystelle Lacroix\Etude clinique sJPU\OECHL100317\_19.raw

**Monoisotopic mass of neutral peptide Mr(calc):** 999.632828 **Fixed modifications:** Carbamidomethyl (C) (apply to specified residues or termini only) **Ions Score:** 51

**Expect:** 0.0001**Matches :** 13/78 fragment ions using 25 most intense peaks ([help](#))

| #  | b                 | b <sup>++</sup>   | b <sup>0</sup> | b <sup>0++</sup> | Seq. | y                 | y <sup>++</sup> | y*         | y* <sup>++</sup> | y <sup>0</sup> | y <sup>0++</sup> | #  |
|----|-------------------|-------------------|----------------|------------------|------|-------------------|-----------------|------------|------------------|----------------|------------------|----|
| 1  | 72.044390         | 36.525833         |                |                  | A    |                   |                 |            |                  |                |                  | 10 |
| 2  | <b>171.112804</b> | 86.060040         |                |                  | V    | 929.602995        | 465.305136      | 912.576446 | 456.791861       | 911.592430     | 456.299853       | 9  |
| 3  | <b>228.134268</b> | 114.570772        |                |                  | G    | <b>830.534581</b> | 415.770929      | 813.508032 | 407.257654       | 812.524016     | 406.765646       | 8  |
| 4  | <b>341.218332</b> | <b>171.112804</b> |                |                  | L    | 773.513117        | 387.260197      | 756.486568 | 378.746922       | 755.502552     | 378.254914       | 7  |
| 5  | <b>454.302396</b> | 227.654836        |                |                  | L    | <b>660.429053</b> | 330.718165      | 643.402504 | 322.204890       | 642.418488     | 321.712882       | 6  |
| 6  | <b>555.350075</b> | 278.178676        | 537.339510     | 269.173393       | T    | <b>547.344989</b> | 274.176133      | 530.318440 | 265.662858       | 529.334424     | 265.170850       | 5  |
| 7  | 654.418489        | 327.712883        | 636.407924     | 318.707600       | V    | 446.297310        | 223.652293      | 429.270761 | 215.139018       | 428.286745     | 214.647010       | 4  |
| 8  | <b>767.502553</b> | 384.254915        | 749.491988     | 375.249632       | I    | <b>347.228896</b> | 174.118086      | 330.202347 | 165.604811       | 329.218331     | 165.112803       | 3  |
| 9  | <b>854.534581</b> | 427.770929        | 836.524016     | 418.765646       | S    | <b>234.144832</b> | 117.576054      | 217.118283 | 109.062779       | 216.134267     | 108.570771       | 2  |
| 10 |                   |                   |                |                  | K    | 147.112804        | 74.060040       | 130.086255 | 65.546765        |                |                  | 1  |

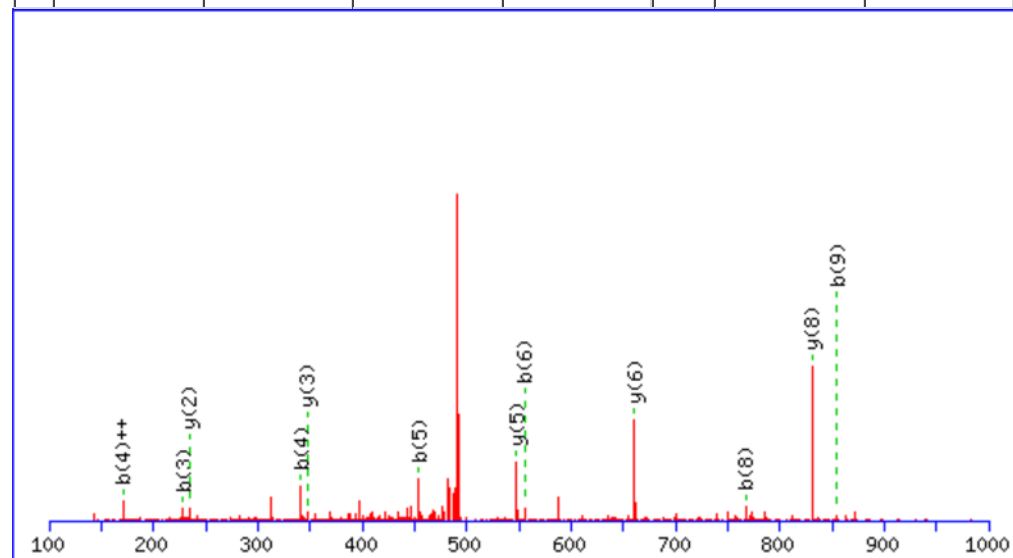

## Peptide View

MS/MS Fragmentation of **SDAAVDTSEITTK**

Found in **IPI00412977**, Tax\_Id=9606 Gene\_Symbol=- Prothymosin alpha

**Experiment:** 36 - OPB-3 **Fraction:** OPB-3

Match to Query 9967: 1465.677848 from(733.846200,2+)

Title: OECHL100317\_19.10576.10576.2.dta

Data file \\Boromir\masse\Data LTQ-Orbitrap\Chrystelle Lacroix\Etude clinique sJPU\OECHL100317\_19.raw

**Monoisotopic mass of neutral peptide Mr(calc):** 1465.678391 **Fixed modifications:** Carbamidomethyl (C) (apply to specified residues or termini only) **Variable modifications:** N-term : Acetyl (N-term) **Ions Score:** 61 **Expect:** 5.9e-005 **Matches :** 27/128 fragment ions using 48 most intense peaks ([help](#))

| #  | b                  | b <sup>++</sup> | b <sup>0</sup>     | b <sup>0++</sup> | Seq. | y                  | y <sup>++</sup> | y*                 | y <sup>*++</sup> | y <sup>0</sup>     | y <sup>0++</sup> | #  |
|----|--------------------|-----------------|--------------------|------------------|------|--------------------|-----------------|--------------------|------------------|--------------------|------------------|----|
| 1  | 130.049869         | 65.528572       | 112.039304         | 56.523290        | S    |                    |                 |                    |                  |                    |                  | 14 |
| 2  | <b>245.076812</b>  | 123.042044      | 227.066247         | 114.036761       | D    | 1337.643082        | 669.325179      | <b>1320.616533</b> | 660.811905       | <b>1319.632517</b> | 660.319897       | 13 |
| 3  | <b>316.113926</b>  | 158.560601      | <b>298.103361</b>  | 149.555319       | A    | 1222.616139        | 611.811708      | 1205.589590        | 603.298433       | 1204.605574        | 602.806425       | 12 |
| 4  | <b>387.151040</b>  | 194.079158      | 369.140475         | 185.073875       | A    | <b>1151.579025</b> | 576.293151      | 1134.552476        | 567.779876       | <b>1133.568460</b> | 567.287868       | 11 |
| 5  | <b>486.219454</b>  | 243.613365      | 468.208889         | 234.608082       | V    | <b>1080.541911</b> | 540.774594      | <b>1063.515362</b> | 532.261319       | <b>1062.531346</b> | 531.769311       | 10 |
| 6  | 601.246397         | 301.126837      | 583.235832         | 292.121554       | D    | <b>981.473497</b>  | 491.240387      | 964.446948         | 482.727112       | <b>963.462932</b>  | 482.235104       | 9  |
| 7  | <b>702.294076</b>  | 351.650676      | 684.283511         | 342.645394       | T    | 866.446554         | 433.726915      | 849.420005         | 425.213641       | 848.435989         | 424.721633       | 8  |
| 8  | 789.326104         | 395.166690      | <b>771.315539</b>  | 386.161408       | S    | 765.398875         | 383.203076      | 748.372326         | 374.689801       | 747.388310         | 374.197793       | 7  |
| 9  | 876.358132         | 438.682704      | 858.347567         | 429.677421       | S    | <b>678.366847</b>  | 339.687062      | 661.340298         | 331.173787       | 660.356282         | 330.681779       | 6  |
| 10 | <b>1005.400725</b> | 503.204001      | <b>987.390160</b>  | 494.198718       | E    | <b>591.334819</b>  | 296.171048      | 574.308270         | 287.657773       | 573.324254         | 287.165765       | 5  |
| 11 | <b>1118.484789</b> | 559.746033      | 1100.474224        | 550.740750       | I    | <b>462.292226</b>  | 231.649751      | 445.265677         | 223.136477       | 444.281661         | 222.644469       | 4  |
| 12 | <b>1219.532468</b> | 610.269872      | 1201.521903        | 601.264590       | T    | <b>349.208162</b>  | 175.107719      | 332.181613         | 166.594445       | 331.197597         | 166.102437       | 3  |
| 13 | <b>1320.580147</b> | 660.793712      | <b>1302.569582</b> | 651.788429       | T    | <b>248.160483</b>  | 124.583879      | 231.133934         | 116.070605       | 230.149918         | 115.578597       | 2  |
| 14 |                    |                 |                    |                  | K    | 147.112804         | 74.060040       | 130.086255         | 65.546765        |                    |                  | 1  |

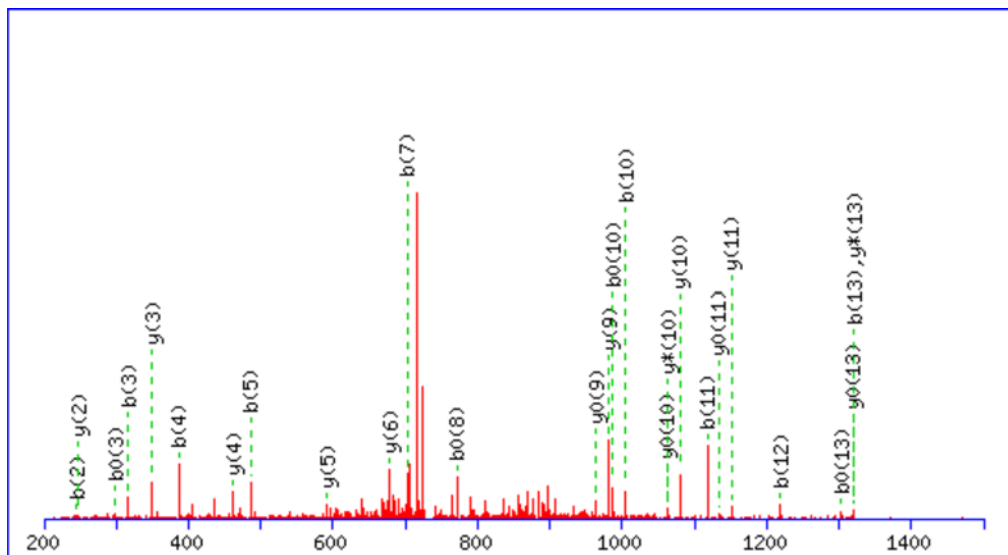

## Peptide View

MS/MS Fragmentation of **VDCGYPHVTPK**

Found in **IPI00018909**, Tax\_Id=9606 Gene\_Symbol=TFF3 trefoil factor 3 precursor

**Experiment:** 36 - OPB-3 **Fraction:** OPB-3

Match to Query 8155: 1271.598048 from(636.806300,2+)

Title: OECHL100317\_19.6268.6268.2.dta

Data file \\Boromir\masse\Data LTQ-Orbitrap\Chrystelle Lacroix\Etude clinique sJPU\OECHL100317\_19.raw

**Monoisotopic mass of neutral peptide Mr(calc):** 1271.596878 **Fixed modifications:** Carbamidomethyl (C) (apply to specified residues or termini only) **Ions Score:** 50

**Expect:** 0.00096 **Matches :** 18/94 fragment ions using 33 most intense peaks ([help](#))

| # | b                 | b <sup>++</sup> | b <sup>0</sup> | b <sup>0++</sup> | Seq. | y                  | y <sup>++</sup>   | y <sup>*</sup> | y <sup>*++</sup>  | y <sup>0</sup> | y <sup>0++</sup>  | #  |
|---|-------------------|-----------------|----------------|------------------|------|--------------------|-------------------|----------------|-------------------|----------------|-------------------|----|
| 1 | 100.075690        | 50.541483       |                |                  | V    |                    |                   |                |                   |                |                   | 11 |
| 2 | 215.102633        | 108.054954      | 197.092068     | 99.049672        | D    | <b>1173.535722</b> | 587.271499        | 1156.509173    | 578.758224        | 1155.525157    | 578.266216        | 10 |
| 3 | <b>375.133282</b> | 188.070279      | 357.122717     | 179.064997       | C    | <b>1058.508779</b> | <b>529.758028</b> | 1041.482230    | <b>521.244753</b> | 1040.498214    | <b>520.752745</b> | 9  |
| 4 | <b>432.154746</b> | 216.581011      | 414.144181     | 207.575729       | G    | <b>898.478130</b>  | 449.742703        | 881.451581     | 441.229428        | 880.467565     | 440.737420        | 8  |
| 5 | <b>595.218075</b> | 298.112676      | 577.207510     | 289.107393       | Y    | <b>841.456666</b>  | 421.231971        | 824.430117     | 412.718696        | 823.446101     | 412.226688        | 7  |
| 6 | 692.270839        | 346.639058      | 674.260274     | 337.633775       | P    | <b>678.393337</b>  | 339.700307        | 661.366788     | 331.187032        | 660.382772     | 330.695024        | 6  |

|    |                    |            |                    |            |   |                   |            |            |            |            |            |   |
|----|--------------------|------------|--------------------|------------|---|-------------------|------------|------------|------------|------------|------------|---|
| 7  | <b>829.329751</b>  | 415.168514 | 811.319186         | 406.163231 | H | 581.340573        | 291.173925 | 564.314024 | 282.660650 | 563.330008 | 282.168642 | 5 |
| 8  | <b>928.398165</b>  | 464.702721 | 910.387600         | 455.697438 | V | <b>444.281661</b> | 222.644468 | 427.255112 | 214.131194 | 426.271096 | 213.639186 | 4 |
| 9  | <b>1029.445844</b> | 515.226560 | 1011.435279        | 506.221277 | T | <b>345.213247</b> | 173.110261 | 328.186698 | 164.596987 | 327.202682 | 164.104979 | 3 |
| 10 | 1126.498608        | 563.752942 | <b>1108.488043</b> | 554.747659 | P | <b>244.165568</b> | 122.586422 | 227.139019 | 114.073148 |            |            | 2 |
| 11 |                    |            |                    |            | K | 147.112804        | 74.060040  | 130.086255 | 65.546765  |            |            | 1 |

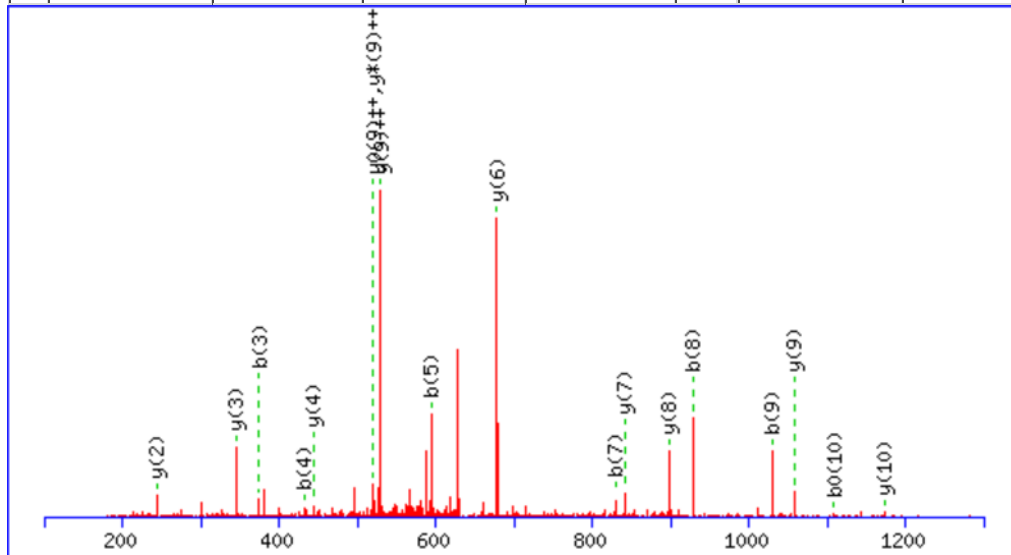

## Peptide View

MS/MS Fragmentation of **LLIYDASNLETGVPSR**

Found in **IP100003111**, Tax\_Id=9606 Gene\_Symbol=LOC652694 Ig kappa chain V-I region AU

**Experiment:** 36 - OPB-3 **Fraction:** OPB-3

Match to Query 13192: 1746.917848 from(874.466200,2+)

Title: OECHL100317\_19.17817.17817.2.dta

Data file \\Boromir\masse\Data LTQ-Orbitrap\Chrystelle Lacroix\Etude clinique sJPU\OECHL100317\_19.raw

**Monoisotopic mass of neutral peptide Mr(calc):** 1746.915192 **Fixed modifications:** Carbamidomethyl (C) (apply to specified residues or termini only) **Ions Score:** 74

**Expect:** 4.9e-006 **Matches :** 27/156 fragment ions using 42 most intense peaks ([help](#))

| # | b          | b <sup>++</sup> | b* | b <sup>*++</sup> | b <sup>0</sup> | b <sup>0++</sup> | Seq. | y | y <sup>++</sup> | y* | y <sup>*++</sup> | y <sup>0</sup> | y <sup>0++</sup> | #  |
|---|------------|-----------------|----|------------------|----------------|------------------|------|---|-----------------|----|------------------|----------------|------------------|----|
| 1 | 114.091340 | 57.549308       |    |                  |                |                  | L    |   |                 |    |                  |                |                  | 16 |

|    |             |            |             |            |             |            |  |   |             |            |             |            |             |            |    |
|----|-------------|------------|-------------|------------|-------------|------------|--|---|-------------|------------|-------------|------------|-------------|------------|----|
| 2  | 227.175404  | 114.091340 |             |            |             |            |  | L | 1634.838427 | 817.922852 | 1617.811878 | 809.409577 | 1616.827862 | 808.917569 | 15 |
| 3  | 340.259468  | 170.633372 |             |            |             |            |  | I | 1521.754363 | 761.380820 | 1504.727814 | 752.867545 | 1503.743798 | 752.375537 | 14 |
| 4  | 503.322797  | 252.165036 |             |            |             |            |  | Y | 1408.670299 | 704.838788 | 1391.643750 | 696.325513 | 1390.659734 | 695.833505 | 13 |
| 5  | 618.349740  | 309.678508 |             |            | 600.339175  | 300.673226 |  | D | 1245.606970 | 623.307123 | 1228.580421 | 614.793849 | 1227.596405 | 614.301841 | 12 |
| 6  | 689.386854  | 345.197065 |             |            | 671.376289  | 336.191782 |  | A | 1130.580027 | 565.793652 | 1113.553478 | 557.280377 | 1112.569462 | 556.788369 | 11 |
| 7  | 776.418882  | 388.713079 |             |            | 758.408317  | 379.707796 |  | S | 1059.542913 | 530.275095 | 1042.516364 | 521.761820 | 1041.532348 | 521.269812 | 10 |
| 8  | 890.461809  | 445.734542 | 873.435260  | 437.221268 | 872.451244  | 436.729260 |  | N | 972.510885  | 486.759081 | 955.484336  | 478.245806 | 954.500320  | 477.753798 | 9  |
| 9  | 1003.545873 | 502.276574 | 986.519324  | 493.763300 | 985.535308  | 493.271292 |  | L | 858.467958  | 429.737617 | 841.441409  | 421.224343 | 840.457393  | 420.732335 | 8  |
| 10 | 1132.588466 | 566.797871 | 1115.561917 | 558.284597 | 1114.577901 | 557.792588 |  | E | 745.383894  | 373.195585 | 728.357345  | 364.682311 | 727.373329  | 364.190303 | 7  |
| 11 | 1233.636145 | 617.321710 | 1216.609596 | 608.808436 | 1215.625580 | 608.316428 |  | T | 616.341301  | 308.674289 | 599.314752  | 300.161014 | 598.330736  | 299.669006 | 6  |
| 12 | 1290.657609 | 645.832442 | 1273.631060 | 637.319168 | 1272.647044 | 636.827160 |  | G | 515.293622  | 258.150449 | 498.267073  | 249.637175 | 497.283057  | 249.145167 | 5  |
| 13 | 1389.726023 | 695.366649 | 1372.699474 | 686.853375 | 1371.715458 | 686.361367 |  | V | 458.272158  | 229.639717 | 441.245609  | 221.126443 | 440.261593  | 220.634435 | 4  |
| 14 | 1486.778787 | 743.893032 | 1469.752238 | 735.379757 | 1468.768222 | 734.887749 |  | P | 359.203744  | 180.105510 | 342.177195  | 171.592236 | 341.193179  | 171.100228 | 3  |
| 15 | 1573.810815 | 787.409046 | 1556.784266 | 778.895771 | 1555.800250 | 778.403763 |  | S | 262.150980  | 131.579128 | 245.124431  | 123.065854 | 244.140415  | 122.573846 | 2  |
| 16 |             |            |             |            |             |            |  | R | 175.118952  | 88.063114  | 158.092403  | 79.549839  |             |            | 1  |

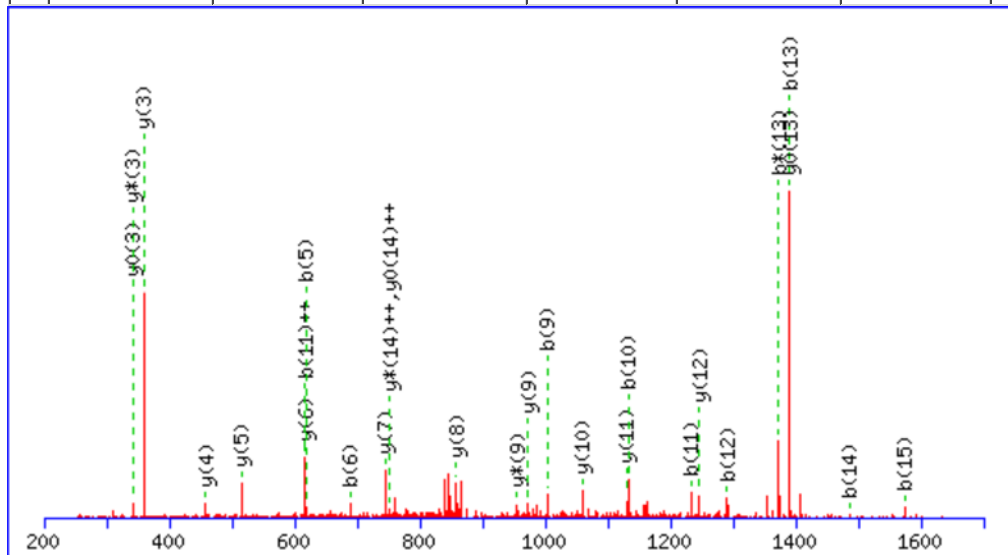

## Peptide View

MS/MS Fragmentation of **CYCDAAHCVATGYMCK**Found in **IPI00011899**, Tax\_Id=9606 Gene\_Symbol=BAMBI BMP and activin membrane-bound inhibitor homolog**Experiment:** 36 - OPB-3 **Fraction:** OPB-3

Match to Query 14961: 1965.731248 from(983.872900,2+)

Title: OECHL100317\_19.11543.11543.2.dta

Data file \\Boromir\masse\Data LTQ-Orbitrap\Chrystelle Lacroix\Etude clinique sJPU\OECHL100317\_19.raw

**Monoisotopic mass of neutral peptide Mr(calc):** 1965.730026**Fixed modifications:** Carbamidomethyl (C) (apply to specified residues or termini only)**Ions Score:** 72**Expect:** 1.6e-007**Matches :** 33/134 fragment ions using 66 most intense peaks ([help](#))

| #  | b                  | b <sup>++</sup>   | b <sup>0</sup> | b <sup>0++</sup>  | Seq. | y                  | y <sup>++</sup>   | y <sup>*</sup>     | y <sup>*++</sup> | y <sup>0</sup>     | y <sup>0++</sup> | #  |
|----|--------------------|-------------------|----------------|-------------------|------|--------------------|-------------------|--------------------|------------------|--------------------|------------------|----|
| 1  | 161.037925         | 81.022600         |                |                   | C    |                    |                   |                    |                  |                    |                  | 16 |
| 2  | 324.101254         | 162.554265        |                |                   | Y    | 1806.706648        | 903.856962        | 1789.680099        | 895.343688       | 1788.696083        | 894.851680       | 15 |
| 3  | <b>484.131903</b>  | 242.569590        |                |                   | C    | <b>1643.643319</b> | <b>822.325298</b> | 1626.616770        | 813.812023       | 1625.632754        | 813.320015       | 14 |
| 4  | <b>599.158846</b>  | 300.083061        | 581.148281     | 291.077779        | D    | <b>1483.612670</b> | 742.309973        | <b>1466.586121</b> | 733.796699       | <b>1465.602105</b> | 733.304691       | 13 |
| 5  | 670.195960         | 335.601618        | 652.185395     | 326.596336        | A    | <b>1368.585727</b> | <b>684.796502</b> | 1351.559178        | 676.283227       | 1350.575162        | 675.791219       | 12 |
| 6  | <b>741.233074</b>  | 371.120175        | 723.222509     | 362.114893        | A    | <b>1297.548613</b> | 649.277945        | 1280.522064        | 640.764670       | 1279.538048        | 640.272662       | 11 |
| 7  | <b>878.291986</b>  | 439.649631        | 860.281421     | 430.644348        | H    | <b>1226.511499</b> | 613.759388        | <b>1209.484950</b> | 605.246113       | <b>1208.500934</b> | 604.754105       | 10 |
| 8  | <b>1038.322635</b> | 519.664956        | 1020.312070    | 510.659673        | C    | <b>1089.452587</b> | 545.229932        | 1072.426038        | 536.716657       | 1071.442022        | 536.224649       | 9  |
| 9  | <b>1137.391049</b> | 569.199163        | 1119.380484    | <b>560.193880</b> | V    | <b>929.421938</b>  | 465.214607        | 912.395389         | 456.701333       | 911.411373         | 456.209325       | 8  |
| 10 | <b>1208.428163</b> | 604.717720        | 1190.417598    | 595.712437        | A    | <b>830.353524</b>  | 415.680400        | 813.326975         | 407.167126       | 812.342959         | 406.675118       | 7  |
| 11 | <b>1309.475842</b> | 655.241559        | 1291.465277    | 646.236277        | T    | <b>759.316410</b>  | 380.161843        | 742.289861         | 371.648569       | <b>741.305845</b>  | 371.156561       | 6  |
| 12 | 1366.497306        | 683.752291        | 1348.486741    | 674.747008        | G    | <b>658.268731</b>  | 329.638004        | 641.242182         | 321.124729       |                    |                  | 5  |
| 13 | <b>1529.560635</b> | 765.283956        | 1511.550070    | 756.278673        | Y    | <b>601.247267</b>  | 301.127272        | 584.220718         | 292.613997       |                    |                  | 4  |
| 14 | <b>1660.601120</b> | <b>830.804198</b> | 1642.590555    | 821.798916        | M    | <b>438.183938</b>  | 219.595607        | 421.157389         | 211.082333       |                    |                  | 3  |
| 15 | 1820.631769        | 910.819523        | 1802.621204    | 901.814240        | C    | <b>307.143453</b>  | 154.075365        | <b>290.116904</b>  | 145.562090       |                    |                  | 2  |
| 16 |                    |                   |                |                   | K    | 147.112804         | 74.060040         | 130.086255         | 65.546765        |                    |                  | 1  |

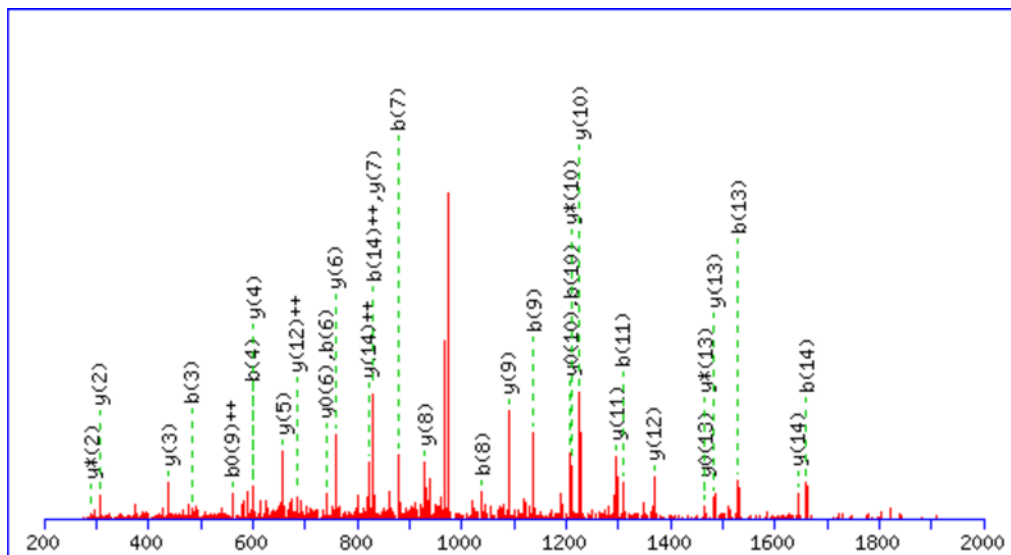

## Peptide View

MS/MS Fragmentation of **TGAVYVAEIGAK**

Found in **IPI00552937**, Tax\_Id=9606 Gene\_Symbol=NHLRC3 NHL repeat-containing protein 3

**Experiment:** 36 - OPB-3 **Fraction:** OPB-3

Match to Query 6633: 1177.633048 from(589.823800,2+)

Title: OECHL100317\_19.12173.12173.2.dta

Data file \\Boromir\masse\Data LTQ-Orbitrap\Chrystelle Lacroix\Etude clinique sJPU\OECHL100317\_19.raw

**Monoisotopic mass of neutral peptide Mr(calc):** 1177.634277 **Fixed modifications:** Carbamidomethyl (C) (apply to specified residues or termini only) **Ions Score:** 65

**Expect:** 2.3e-005 **Matches :** 17/102 fragment ions using 31 most intense peaks ([help](#))

| # | b                 | b <sup>++</sup> | b <sup>0</sup>    | b <sup>0++</sup> | Seq. | y                  | y <sup>++</sup> | y <sup>*</sup> | y <sup>*++</sup> | y <sup>0</sup> | y <sup>0++</sup> | #  |
|---|-------------------|-----------------|-------------------|------------------|------|--------------------|-----------------|----------------|------------------|----------------|------------------|----|
| 1 | 102.054955        | 51.531116       | 84.044390         | 42.525833        | T    |                    |                 |                |                  |                |                  | 12 |
| 2 | 159.076419        | 80.041847       | 141.065854        | 71.036565        | G    | <b>1077.593888</b> | 539.300582      | 1060.567339    | 530.787308       | 1059.583323    | 530.295300       | 11 |
| 3 | <b>230.113533</b> | 115.560404      | 212.102968        | 106.555122       | A    | <b>1020.572424</b> | 510.789850      | 1003.545875    | 502.276576       | 1002.561859    | 501.784568       | 10 |
| 4 | <b>329.181947</b> | 165.094611      | 311.171382        | 156.089329       | V    | <b>949.535310</b>  | 475.271293      | 932.508761     | 466.758019       | 931.524745     | 466.266011       | 9  |
| 5 | <b>492.245276</b> | 246.626276      | <b>474.234711</b> | 237.620994       | Y    | <b>850.466896</b>  | 425.737086      | 833.440347     | 417.223812       | 832.456331     | 416.731804       | 8  |
| 6 | 591.313690        | 296.160483      | <b>573.303125</b> | 287.155201       | V    | <b>687.403567</b>  | 344.205422      | 670.377018     | 335.692147       | 669.393002     | 335.200139       | 7  |



|    |             |            |             |            |   |            |            |            |            |            |            |   |
|----|-------------|------------|-------------|------------|---|------------|------------|------------|------------|------------|------------|---|
| 7  | 662.350804  | 331.679040 | 644.340239  | 322.673758 | A | 588.335153 | 294.671215 | 571.308604 | 286.157940 | 570.324588 | 285.665932 | 6 |
| 8  | 791.393397  | 396.200337 | 773.382832  | 387.195054 | E | 517.298039 | 259.152658 | 500.271490 | 250.639383 | 499.287474 | 250.147375 | 5 |
| 9  | 904.477461  | 452.742369 | 886.466896  | 443.737086 | I | 388.255446 | 194.631361 | 371.228897 | 186.118087 |            |            | 4 |
| 10 | 961.498925  | 481.253101 | 943.488360  | 472.247818 | G | 275.171382 | 138.089329 | 258.144833 | 129.576055 |            |            | 3 |
| 11 | 1032.536039 | 516.771658 | 1014.525474 | 507.766375 | A | 218.149918 | 109.578597 | 201.123369 | 101.065322 |            |            | 2 |
| 12 |             |            |             |            | K | 147.112804 | 74.060040  | 130.086255 | 65.546765  |            |            | 1 |

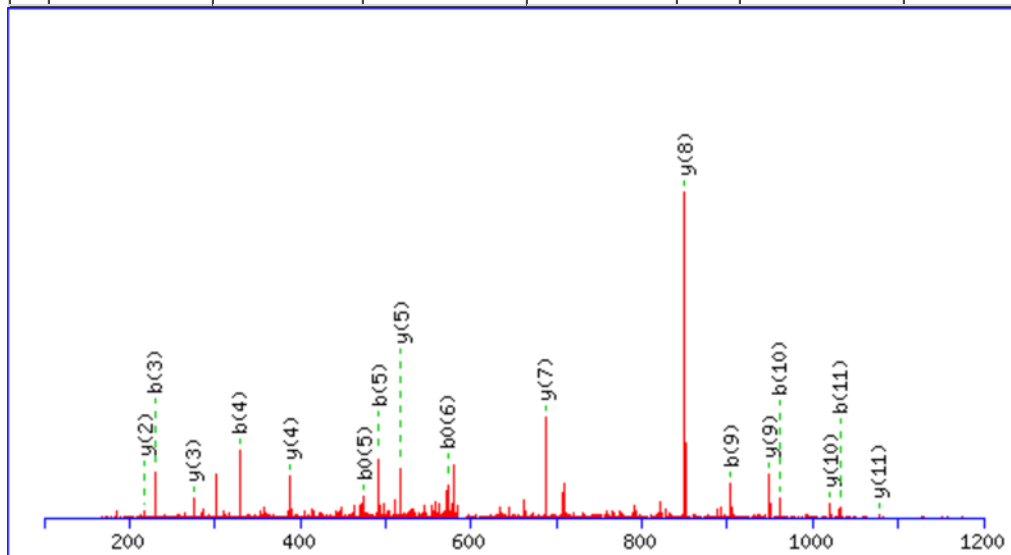

## Peptide View

MS/MS Fragmentation of **VYIASSGSTAIK**

Found in **IPI00025318**, Tax\_Id=9606 Gene\_Symbol=SH3BGRL SH3 domain-binding glutamic acid-rich-like protein

**Experiment:** 36 - OPB-3 **Fraction:** OPB-3

Match to Query 8249: 1282.676848 from(642.345700,2+)

Title: OECHL100317\_19.8607.8607.2.dta

Data file \\Boromir\masse\Data LTQ-Orbitrap\Chrystelle Lacroix\Etude clinique sJPU\OECHL100317\_19.raw

**Monoisotopic mass of neutral peptide Mr(calc):** 1282.676865 **Fixed modifications:** Carbamidomethyl (C) (apply to specified residues or termini only) **Ions Score:** 60

**Expect:** 7e-005 **Matches :** 32/106 fragment ions using 63 most intense peaks ([help](#))

| # | b | b <sup>++</sup> | b <sup>0</sup> | b <sup>0++</sup> | Seq. | y | y <sup>++</sup> | y* | y <sup>*++</sup> | y <sup>0</sup> | y <sup>0++</sup> | # |
|---|---|-----------------|----------------|------------------|------|---|-----------------|----|------------------|----------------|------------------|---|
|---|---|-----------------|----------------|------------------|------|---|-----------------|----|------------------|----------------|------------------|---|

|    |                    |            |                    |            |   |                    |                   |                    |                   |                   |                   |  |    |
|----|--------------------|------------|--------------------|------------|---|--------------------|-------------------|--------------------|-------------------|-------------------|-------------------|--|----|
| 1  | 100.075690         | 50.541483  |                    |            | V |                    |                   |                    |                   |                   |                   |  | 13 |
| 2  | <b>263.139019</b>  | 132.073148 |                    |            | Y | 1184.615744        | 592.811510        | 1167.589195        | 584.298236        | 1166.605179       | 583.806227        |  | 12 |
| 3  | <b>376.223083</b>  | 188.615180 |                    |            | I | <b>1021.552415</b> | <b>511.279846</b> | <b>1004.525866</b> | 502.766571        | 1003.541850       | 502.274563        |  | 11 |
| 4  | <b>447.260197</b>  | 224.133737 |                    |            | A | <b>908.468351</b>  | 454.737814        | 891.441802         | <b>446.224539</b> | <b>890.457786</b> | <b>445.732531</b> |  | 10 |
| 5  | <b>534.292225</b>  | 267.649751 | <b>516.281660</b>  | 258.644468 | S | <b>837.431237</b>  | 419.219257        | 820.404688         | 410.705982        | <b>819.420672</b> | 410.213974        |  | 9  |
| 6  | <b>621.324253</b>  | 311.165765 | 603.313688         | 302.160482 | S | <b>750.399209</b>  | <b>375.703243</b> | 733.372660         | 367.189968        | 732.388644        | 366.697960        |  | 8  |
| 7  | <b>708.356281</b>  | 354.681779 | <b>690.345716</b>  | 345.676496 | S | <b>663.367181</b>  | 332.187229        | 646.340632         | 323.673954        | 645.356616        | 323.181946        |  | 7  |
| 8  | 765.377745         | 383.192511 | 747.367180         | 374.187228 | G | <b>576.335153</b>  | 288.671215        | 559.308604         | 280.157940        | 558.324588        | 279.665932        |  | 6  |
| 9  | <b>852.409773</b>  | 426.708525 | 834.399208         | 417.703242 | S | 519.313689         | <b>260.160483</b> | 502.287140         | 251.647208        | 501.303124        | 251.155200        |  | 5  |
| 10 | <b>953.457452</b>  | 477.232364 | <b>935.446887</b>  | 468.227082 | T | <b>432.281661</b>  | 216.644468        | 415.255112         | 208.131194        | 414.271096        | 207.639186        |  | 4  |
| 11 | <b>1024.494566</b> | 512.750921 | <b>1006.484001</b> | 503.745638 | A | <b>331.233982</b>  | 166.120629        | 314.207433         | 157.607354        |                   |                   |  | 3  |
| 12 | <b>1137.578630</b> | 569.292953 | <b>1119.568065</b> | 560.287670 | I | <b>260.196868</b>  | 130.602072        | 243.170319         | 122.088798        |                   |                   |  | 2  |
| 13 |                    |            |                    |            | K | 147.112804         | 74.060040         | 130.086255         | 65.546765         |                   |                   |  | 1  |

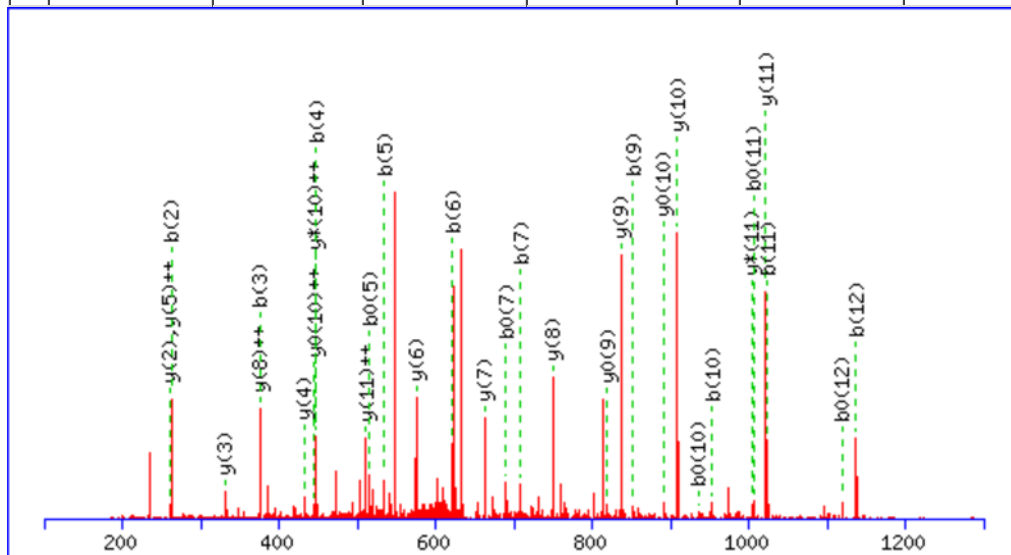

## Peptide View

MS/MS Fragmentation of **VSAQQVQGVHAR**

Found in **IPI00011832**, Tax\_Id=9606 Gene\_Symbol=SPP2 Secreted phosphoprotein 24

**Experiment:** 36 - OPB-3 **Fraction:** OPB-3

Match to Query 8218: 1278.680248 from(640.347400,2+)

Title: OECHL100317\_19.4481.4481.2.dta

Data file \\Boromir\masse\Data LTQ-Orbitrap\Chrystelle Lacroix\Etude clinique sJPU\OECHL100317\_19.raw

**Monoisotopic mass of neutral peptide Mr(calc):** 1278.679291 **Fixed modifications:** Carbamidomethyl (C) (apply to specified residues or termini only) **Ions Score:** 49

**Expect:** 0.00086 **Matches :** 21/104 fragment ions using 44 most intense peaks ([help](#))

| #  | b                  | b <sup>++</sup>   | b <sup>*</sup> | b <sup>*++</sup> | b <sup>0</sup>    | b <sup>0++</sup> | Seq. | y                  | y <sup>++</sup>   | y <sup>*</sup>    | y <sup>*++</sup>  | y <sup>0</sup> | y <sup>0++</sup> | #  |
|----|--------------------|-------------------|----------------|------------------|-------------------|------------------|------|--------------------|-------------------|-------------------|-------------------|----------------|------------------|----|
| 1  | 100.075690         | 50.541483         |                |                  |                   |                  | V    |                    |                   |                   |                   |                |                  | 12 |
| 2  | 187.107718         | 94.057497         |                |                  | 169.097153        | 85.052214        | S    | <b>1180.618146</b> | 590.812711        | 1163.591597       | 582.299437        | 1162.607581    | 581.807429       | 11 |
| 3  | 258.144832         | 129.576054        |                |                  | <b>240.134267</b> | 120.570772       | A    | <b>1093.586118</b> | <b>547.296697</b> | 1076.559569       | 538.783423        |                |                  | 10 |
| 4  | 386.203410         | 193.605343        | 369.176861     | 185.092069       | 368.192845        | 184.600061       | Q    | <b>1022.549004</b> | 511.778140        | 1005.522455       | <b>503.264866</b> |                |                  | 9  |
| 5  | 514.261988         | <b>257.634632</b> | 497.235439     | 249.121358       | 496.251423        | 248.629350       | Q    | <b>894.490426</b>  | 447.748851        | <b>877.463877</b> | <b>439.235577</b> |                |                  | 8  |
| 6  | 613.330402         | 307.168839        | 596.303853     | 298.655565       | 595.319837        | 298.163557       | V    | <b>766.431848</b>  | <b>383.719562</b> | 749.405299        | 375.206288        |                |                  | 7  |
| 7  | <b>741.388980</b>  | 371.198128        | 724.362431     | 362.684854       | 723.378415        | 362.192846       | Q    | <b>667.363434</b>  | 334.185355        | 650.336885        | 325.672081        |                |                  | 6  |
| 8  | 798.410444         | 399.708860        | 781.383895     | 391.195586       | 780.399879        | 390.703578       | G    | <b>539.304856</b>  | 270.156066        | 522.278307        | 261.642792        |                |                  | 5  |
| 9  | <b>897.478858</b>  | 449.243067        | 880.452309     | 440.729793       | <b>879.468293</b> | 440.237785       | V    | 482.283392         | 241.645334        | 465.256843        | 233.132059        |                |                  | 4  |
| 10 | <b>1034.537770</b> | 517.772523        | 1017.511221    | 509.259249       | 1016.527205       | 508.767241       | H    | <b>383.214978</b>  | 192.111127        | 366.188429        | 183.597852        |                |                  | 3  |
| 11 | <b>1105.574884</b> | 553.291080        | 1088.548335    | 544.777806       | 1087.564319       | 544.285798       | A    | <b>246.156066</b>  | 123.581671        | 229.129517        | 115.068396        |                |                  | 2  |
| 12 |                    |                   |                |                  |                   |                  | R    | 175.118952         | 88.063114         | 158.092403        | 79.549839         |                |                  | 1  |

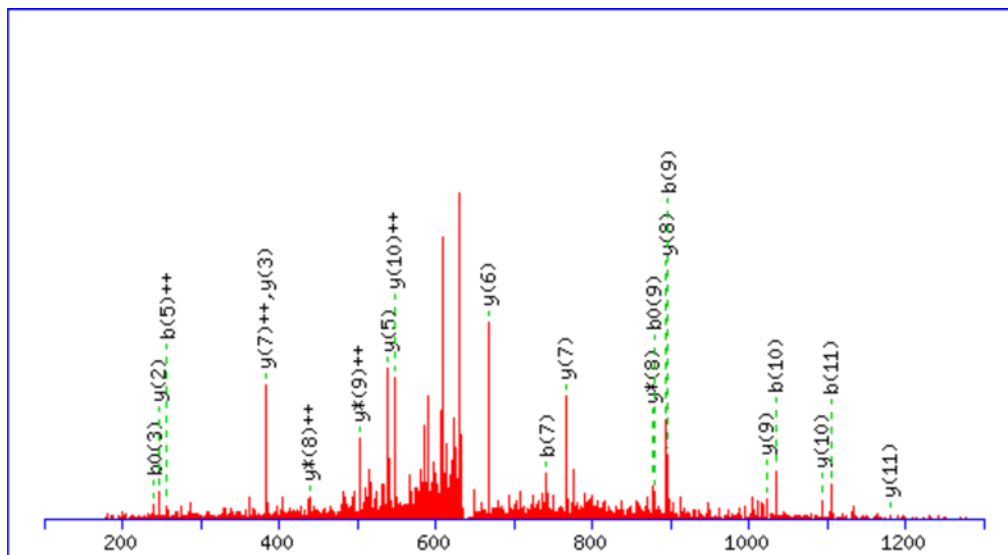

## Peptide View

MS/MS Fragmentation of **GKIEEDSEVLMMIK**

Found in **IPI00034319**, Tax\_Id=9606 Gene\_Symbol=CUTA Isoform A of Protein CutA

**Experiment:** 36 - OPB-3 **Fraction:** OPB-3

Match to Query 11430: 1620.810448 from(811.412500,2+)

Title: OECHL100317\_19.17952.17952.2.dta

Data file \\Boromir\masse\Data LTQ-Orbitrap\Chrystelle Lacroix\Etude clinique sJPU\OECHL100317\_19.raw

**Monoisotopic mass of neutral peptide Mr(calc):** 1620.810242 **Fixed modifications:** Carbamidomethyl (C) (apply to specified residues or termini only) **Ions Score:** 53

**Expect:** 0.00074 **Matches :** 8/136 fragment ions using 14 most intense peaks ([help](#))

| # | b          | b <sup>++</sup> | b*         | b <sup>*++</sup> | b <sup>0</sup> | b <sup>0++</sup> | Seq.     | y                  | y <sup>++</sup> | y*          | y <sup>*++</sup> | y <sup>0</sup> | y <sup>0++</sup> | #         |
|---|------------|-----------------|------------|------------------|----------------|------------------|----------|--------------------|-----------------|-------------|------------------|----------------|------------------|-----------|
| 1 | 58.028740  | 29.518008       |            |                  |                |                  | <b>G</b> |                    |                 |             |                  |                |                  | <b>14</b> |
| 2 | 186.123703 | 93.565489       | 169.097154 | 85.052215        |                |                  | <b>K</b> | 1564.796093        | 782.901684      | 1547.769544 | 774.388410       | 1546.785528    | 773.896402       | <b>13</b> |
| 3 | 299.207767 | 150.107521      | 282.181218 | 141.594247       |                |                  | <b>I</b> | <b>1436.701130</b> | 718.854203      | 1419.674581 | 710.340929       | 1418.690565    | 709.848920       | <b>12</b> |
| 4 | 428.250360 | 214.628818      | 411.223811 | 206.115544       | 410.239795     | 205.623536       | <b>E</b> | <b>1323.617066</b> | 662.312171      | 1306.590517 | 653.798896       | 1305.606501    | 653.306888       | <b>11</b> |
| 5 | 557.292953 | 279.150115      | 540.266404 | 270.636840       | 539.282388     | 270.144832       | <b>E</b> | <b>1194.574473</b> | 597.790874      | 1177.547924 | 589.277600       | 1176.563908    | 588.785592       | <b>10</b> |
| 6 | 672.319896 | 336.663586      | 655.293347 | 328.150312       | 654.309331     | 327.658304       | <b>D</b> | <b>1065.531880</b> | 533.269578      | 1048.505331 | 524.756303       | 1047.521315    | 524.264295       | <b>9</b>  |

|    |             |            |             |            |             |            |   |            |            |            |            |            |            |   |
|----|-------------|------------|-------------|------------|-------------|------------|---|------------|------------|------------|------------|------------|------------|---|
| 7  | 759.351924  | 380.179600 | 742.325375  | 371.666326 | 741.341359  | 371.174318 | S | 950.504937 | 475.756106 | 933.478388 | 467.242832 | 932.494372 | 466.750824 | 8 |
| 8  | 888.394517  | 444.700897 | 871.367968  | 436.187622 | 870.383952  | 435.695614 | E | 863.472909 | 432.240092 | 846.446360 | 423.726818 | 845.462344 | 423.234810 | 7 |
| 9  | 987.462931  | 494.235104 | 970.436382  | 485.721829 | 969.452366  | 485.229821 | V | 734.430316 | 367.718796 | 717.403767 | 359.205521 |            |            | 6 |
| 10 | 1100.546995 | 550.777135 | 1083.520446 | 542.263861 | 1082.536430 | 541.771853 | L | 635.361902 | 318.184589 | 618.335353 | 309.671314 |            |            | 5 |
| 11 | 1231.587480 | 616.297378 | 1214.560931 | 607.784104 | 1213.576915 | 607.292095 | M | 522.277838 | 261.642557 | 505.251289 | 253.129282 |            |            | 4 |
| 12 | 1362.627965 | 681.817620 | 1345.601416 | 673.304346 | 1344.617400 | 672.812338 | M | 391.237353 | 196.122314 | 374.210804 | 187.609040 |            |            | 3 |
| 13 | 1475.712029 | 738.359652 | 1458.685480 | 729.846378 | 1457.701464 | 729.354370 | I | 260.196868 | 130.602072 | 243.170319 | 122.088797 |            |            | 2 |
| 14 |             |            |             |            |             |            | K | 147.112804 | 74.060040  | 130.086255 | 65.546765  |            |            | 1 |

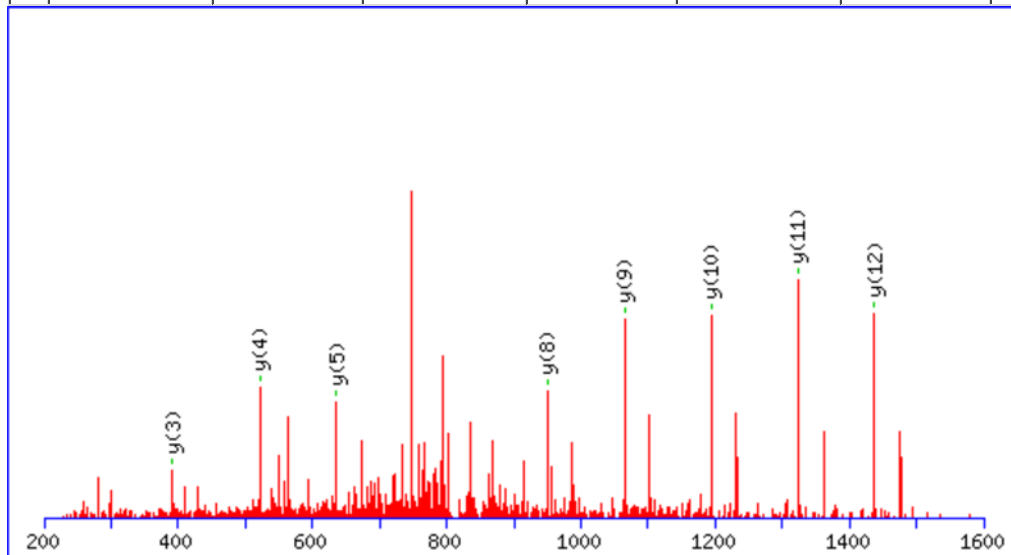

## Peptide View

MS/MS Fragmentation of **NKDGVLVDEFGLPQIPAS**

Found in **IPI00100796**, Tax\_Id=9606 Gene\_Symbol=CHMP5 Charged multivesicular body protein 5

**Experiment:** 36 - OPB-3 **Fraction:** OPB-3

Match to Query 14415: 1897.980248 from(949.997400,2+)

Title: OECHL100317\_19.21039.21039.2.dta

Data file \\Boromir\masse\Data LTQ-Orbitrap\Chrystelle Lacroix\Etude clinique sJPU\OECHL100317\_19.raw

**Monoisotopic mass of neutral peptide Mr(calc):** 1897.978546 **Fixed modifications:** Carbamidomethyl (C) (apply to specified residues or termini only) **Ions Score:** 50

**Expect:** 0.0013**Matches :** 30/192 fragment ions using 64 most intense peaks ([help](#))

| #  | <b>b</b>           | <b>b<sup>++</sup></b> | <b>b*</b>          | <b>b<sup>*++</sup></b> | <b>b<sup>0</sup></b> | <b>b<sup>0++</sup></b> | Seq.     | <b>y</b>           | <b>y<sup>++</sup></b> | <b>y*</b>   | <b>y<sup>*++</sup></b> | <b>y<sup>0</sup></b> | <b>y<sup>0++</sup></b> | #         |
|----|--------------------|-----------------------|--------------------|------------------------|----------------------|------------------------|----------|--------------------|-----------------------|-------------|------------------------|----------------------|------------------------|-----------|
| 1  | 115.050203         | 58.028740             | 98.023654          | 49.515465              |                      |                        | <b>N</b> |                    |                       |             |                        |                      |                        | <b>18</b> |
| 2  | 243.145166         | 122.076221            | 226.118617         | 113.562947             |                      |                        | <b>K</b> | 1784.942893        | 892.975085            | 1767.916344 | 884.461810             | 1766.932328          | 883.969802             | <b>17</b> |
| 3  | 358.172109         | 179.589693            | 341.145560         | 171.076418             | 340.161544           | 170.584410             | <b>D</b> | 1656.847930        | 828.927603            | 1639.821381 | 820.414329             | 1638.837365          | 819.922321             | <b>16</b> |
| 4  | 415.193573         | 208.100425            | 398.167024         | 199.587150             | 397.183008           | 199.095142             | <b>G</b> | <b>1541.820987</b> | 771.414132            | 1524.794438 | 762.900857             | 1523.810422          | 762.408849             | <b>15</b> |
| 5  | <b>514.261987</b>  | 257.634632            | 497.235438         | 249.121357             | 496.251422           | 248.629349             | <b>V</b> | 1484.799523        | 742.903400            | 1467.772974 | 734.390125             | 1466.788958          | 733.898117             | <b>14</b> |
| 6  | <b>627.346051</b>  | 314.176664            | 610.319502         | 305.663389             | 609.335486           | 305.171381             | <b>L</b> | <b>1385.731109</b> | 693.369193            | 1368.704560 | 684.855918             | 1367.720544          | 684.363910             | <b>13</b> |
| 7  | <b>726.414465</b>  | 363.710871            | 709.387916         | 355.197596             | 708.403900           | 354.705588             | <b>V</b> | 1272.647045        | 636.827160            | 1255.620496 | 628.313886             | 1254.636480          | <b>627.821878</b>      | <b>12</b> |
| 8  | <b>841.441408</b>  | 421.224342            | 824.414859         | 412.711068             | 823.430843           | 412.219060             | <b>D</b> | <b>1173.578631</b> | 587.292954            | 1156.552082 | 578.779679             | 1155.568066          | 578.287671             | <b>11</b> |
| 9  | <b>970.484001</b>  | 485.745639            | 953.457452         | 477.232364             | 952.473436           | 476.740356             | <b>E</b> | <b>1058.551688</b> | 529.779482            | 1041.525139 | 521.266208             | 1040.541123          | 520.774200             | <b>10</b> |
| 10 | <b>1117.552415</b> | 559.279846            | 1100.525866        | 550.766571             | 1099.541850          | 550.274563             | <b>F</b> | <b>929.509095</b>  | 465.258186            | 912.482546  | 456.744911             | 911.498530           | 456.252903             | <b>9</b>  |
| 11 | <b>1174.573879</b> | 587.790578            | 1157.547330        | 579.277303             | 1156.563314          | 578.785295             | <b>G</b> | 782.440681         | <b>391.723979</b>     | 765.414132  | 383.210704             | <b>764.430116</b>    | 382.718696             | <b>8</b>  |
| 12 | <b>1287.657943</b> | 644.332609            | <b>1270.631394</b> | 635.819335             | <b>1269.647378</b>   | 635.327327             | <b>L</b> | 725.419217         | 363.213247            | 708.392668  | 354.699972             | 707.408652           | 354.207964             | <b>7</b>  |
| 13 | <b>1384.710707</b> | 692.858992            | 1367.684158        | 684.345717             | 1366.700142          | 683.853709             | <b>P</b> | <b>612.335153</b>  | 306.671215            | 595.308604  | 298.157940             | 594.324588           | 297.665932             | <b>6</b>  |
| 14 | <b>1512.769285</b> | 756.888281            | 1495.742736        | <b>748.375006</b>      | 1494.758720          | 747.882998             | <b>Q</b> | 515.282389         | 258.144833            | 498.255840  | 249.631558             | 497.271824           | 249.139550             | <b>5</b>  |
| 15 | <b>1625.853349</b> | <b>813.430313</b>     | 1608.826800        | <b>804.917038</b>      | 1607.842784          | <b>804.425030</b>      | <b>I</b> | <b>387.223811</b>  | 194.115543            |             |                        | 369.213246           | 185.110261             | <b>4</b>  |
| 16 | 1722.906113        | 861.956695            | 1705.879564        | 853.443420             | 1704.895548          | 852.951412             | <b>P</b> | <b>274.139747</b>  | 137.573512            |             |                        | 256.129182           | 128.568229             | <b>3</b>  |
| 17 | 1793.943227        | <b>897.475252</b>     | 1776.916678        | 888.961977             | 1775.932662          | 888.469969             | <b>A</b> | 177.086983         | 89.047130             |             |                        | 159.076418           | 80.041847              | <b>2</b>  |
| 18 |                    |                       |                    |                        |                      |                        | <b>S</b> | 106.049869         | 53.528573             |             |                        | 88.039304            | 44.523290              | <b>1</b>  |

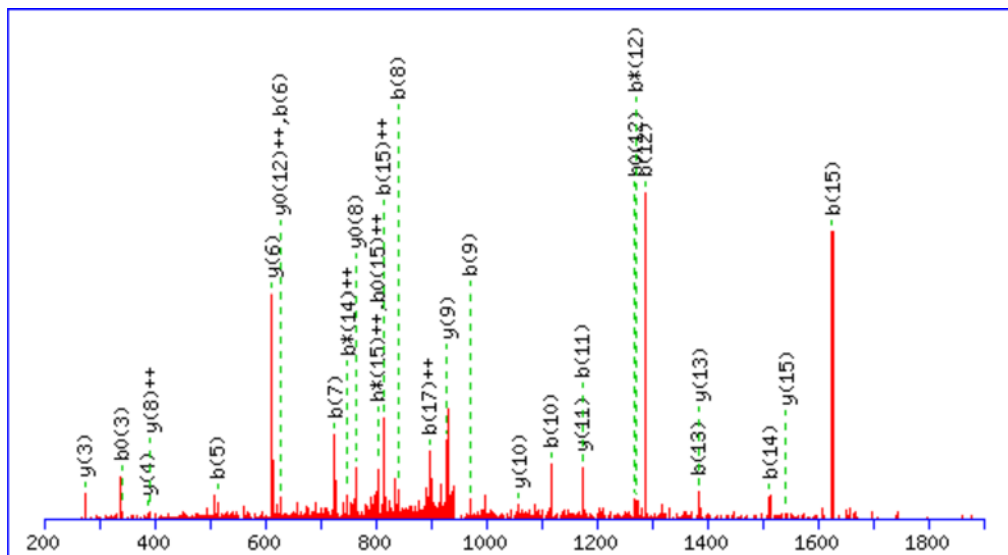

## Peptide View

MS/MS Fragmentation of **DFSLTSSSQTPGATK**

Found in **IPI00291300**, Tax\_Id=9606 Gene\_Symbol=PODXL2 Putative uncharacterized protein PODXL2

**Experiment:** 18 - NOPA3 **Fraction:** NOPA3

Match to Query 11269: 1525.727048 from(763.870800,2+)

Title: OECHL100317\_17.10967.10967.2.dta

Data file \\Boromir\masse\Data LTQ-Orbitrap\Chrystelle Lacroix\Etude clinique sJPU\OECHL100317\_17.raw

**Monoisotopic mass of neutral peptide Mr(calc):** 1525.726028 **Fixed modifications:** Carbamidomethyl (C) (apply to specified residues or termini only) **Ions Score:** 86

**Expect:** 2.8e-007 **Matches :** 36/150 fragment ions using 52 most intense peaks ([help](#))

| # | b                 | b <sup>++</sup> | b* | b <sup>*++</sup> | b <sup>0</sup>    | b <sup>0++</sup> | Seq.     | y                  | y <sup>++</sup>   | y*          | y <sup>*++</sup>  | y <sup>0</sup> | y <sup>0++</sup>  | #         |
|---|-------------------|-----------------|----|------------------|-------------------|------------------|----------|--------------------|-------------------|-------------|-------------------|----------------|-------------------|-----------|
| 1 | 116.034219        | 58.520748       |    |                  | 98.023654         | 49.515465        | <b>D</b> |                    |                   |             |                   |                |                   | <b>15</b> |
| 2 | <b>263.102633</b> | 132.054954      |    |                  | 245.092068        | 123.049672       | <b>F</b> | 1411.706351        | 706.356813        | 1394.679802 | 697.843539        | 1393.695786    | 697.351531        | <b>14</b> |
| 3 | <b>350.134661</b> | 175.570968      |    |                  | <b>332.124096</b> | 166.565686       | <b>S</b> | <b>1264.637937</b> | <b>632.822607</b> | 1247.611388 | <b>624.309332</b> | 1246.627372    | <b>623.817324</b> | <b>13</b> |
| 4 | 463.218725        | 232.113001      |    |                  | <b>445.208160</b> | 223.107718       | <b>L</b> | <b>1177.605909</b> | 589.306592        | 1160.579360 | 580.793318        | 1159.595344    | 580.301310        | <b>12</b> |
| 5 | <b>564.266404</b> | 282.636840      |    |                  | <b>546.255839</b> | 273.631558       | <b>T</b> | <b>1064.521845</b> | 532.764561        | 1047.495296 | 524.251286        | 1046.511280    | 523.759278        | <b>11</b> |
| 6 | <b>651.298432</b> | 326.152854      |    |                  | <b>633.287867</b> | 317.147572       | <b>S</b> | <b>963.474166</b>  | 482.240721        | 946.447617  | <b>473.727446</b> | 945.463601     | <b>473.235438</b> | <b>10</b> |

|    |             |            |             |            |             |            |   |            |            |            |            |            |            |   |
|----|-------------|------------|-------------|------------|-------------|------------|---|------------|------------|------------|------------|------------|------------|---|
| 7  | 738.330460  | 369.668868 |             |            | 720.319895  | 360.663586 | S | 876.442138 | 438.724707 | 859.415589 | 430.211432 | 858.431573 | 429.719424 | 9 |
| 8  | 825.362488  | 413.184882 |             |            | 807.351923  | 404.179599 | S | 789.410110 | 395.208693 | 772.383561 | 386.695418 | 771.399545 | 386.203410 | 8 |
| 9  | 953.421066  | 477.214171 | 936.394517  | 468.700897 | 935.410501  | 468.208889 | Q | 702.378082 | 351.692679 | 685.351533 | 343.179404 | 684.367517 | 342.687396 | 7 |
| 10 | 1054.468745 | 527.738010 | 1037.442196 | 519.224736 | 1036.458180 | 518.732728 | T | 574.319504 | 287.663390 | 557.292955 | 279.150115 | 556.308939 | 278.658107 | 6 |
| 11 | 1151.521509 | 576.264392 | 1134.494960 | 567.751118 | 1133.510944 | 567.259110 | P | 473.271825 | 237.139550 | 456.245276 | 228.626276 | 455.261260 | 228.134268 | 5 |
| 12 | 1208.542973 | 604.775124 | 1191.516424 | 596.261850 | 1190.532408 | 595.769842 | G | 376.219061 | 188.613168 | 359.192512 | 180.099894 | 358.208496 | 179.607886 | 4 |
| 13 | 1279.580087 | 640.293681 | 1262.553538 | 631.780407 | 1261.569522 | 631.288399 | A | 319.197597 | 160.102436 | 302.171048 | 151.589162 | 301.187032 | 151.097154 | 3 |
| 14 | 1380.627766 | 690.817521 | 1363.601217 | 682.304246 | 1362.617201 | 681.812238 | T | 248.160483 | 124.583879 | 231.133934 | 116.070605 | 230.149918 | 115.578597 | 2 |
| 15 |             |            |             |            |             |            | K | 147.112804 | 74.060040  | 130.086255 | 65.546765  |            |            | 1 |

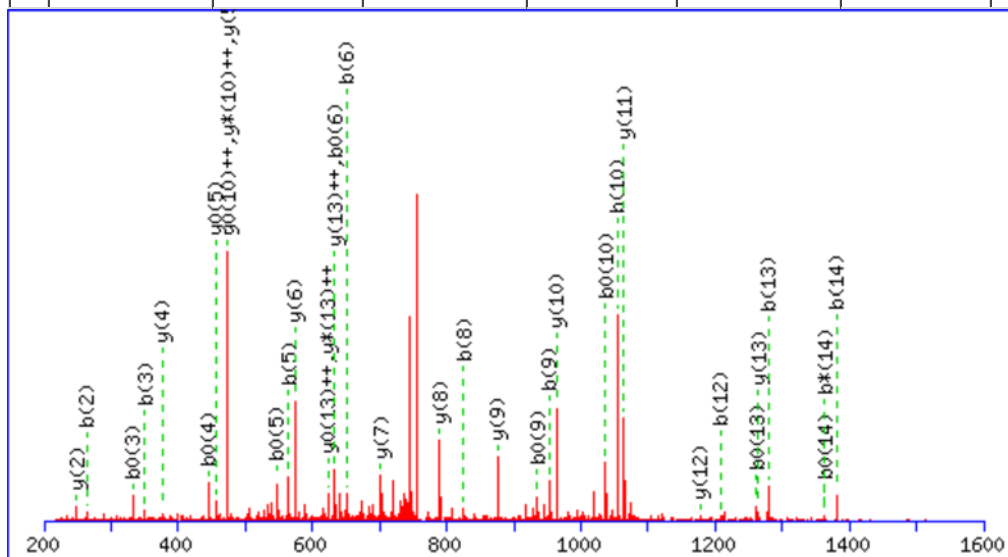

## Peptide View

MS/MS Fragmentation of **SDAAVDTSSSEITTK**

Found in **IP100412977**, Tax\_Id=9606 Gene\_Symbol=- Prothymosin alpha

**Experiment:** 18 - NOPA3 **Fraction:** NOPA3

Match to Query 10657: 1465.679248 from(733.846900,2+)

Title: OECHL100317\_17.10113.10113.2.dta

Data file \\Boromir\masse\Data LTQ-Orbitrap\Chrystelle Lacroix\Etude clinique sJPU\OECHL100317\_17.raw



**Monoisotopic mass of neutral peptide Mr(calc):** 1465.678391**Fixed modifications:** Carbamidomethyl (C) (apply to specified residues or termini only)**Variable modifications:** N-term : Acetyl (N-term)**Ions Score:** 102 **Expect:** 5.2e-009**Matches :** 29/128 fragment ions using 34 most intense peaks ([help](#))

| #  | b           | b <sup>++</sup> | b <sup>0</sup> | b <sup>0++</sup> | Seq. | y           | y <sup>++</sup> | y*          | y* <sup>++</sup> | y <sup>0</sup> | y <sup>0++</sup> | #  |
|----|-------------|-----------------|----------------|------------------|------|-------------|-----------------|-------------|------------------|----------------|------------------|----|
| 1  | 130.049869  | 65.528572       | 112.039304     | 56.523290        | S    |             |                 |             |                  |                |                  | 14 |
| 2  | 245.076812  | 123.042044      | 227.066247     | 114.036761       | D    | 1337.643082 | 669.325179      | 1320.616533 | 660.811905       | 1319.632517    | 660.319897       | 13 |
| 3  | 316.113926  | 158.560601      | 298.103361     | 149.555319       | A    | 1222.616139 | 611.811708      | 1205.589590 | 603.298433       | 1204.605574    | 602.806425       | 12 |
| 4  | 387.151040  | 194.079158      | 369.140475     | 185.073875       | A    | 1151.579025 | 576.293151      | 1134.552476 | 567.779876       | 1133.568460    | 567.287868       | 11 |
| 5  | 486.219454  | 243.613365      | 468.208889     | 234.608082       | V    | 1080.541911 | 540.774594      | 1063.515362 | 532.261319       | 1062.531346    | 531.769311       | 10 |
| 6  | 601.246397  | 301.126837      | 583.235832     | 292.121554       | D    | 981.473497  | 491.240387      | 964.446948  | 482.727112       | 963.462932     | 482.235104       | 9  |
| 7  | 702.294076  | 351.650676      | 684.283511     | 342.645394       | T    | 866.446554  | 433.726915      | 849.420005  | 425.213641       | 848.435989     | 424.721633       | 8  |
| 8  | 789.326104  | 395.166690      | 771.315539     | 386.161408       | S    | 765.398875  | 383.203076      | 748.372326  | 374.689801       | 747.388310     | 374.197793       | 7  |
| 9  | 876.358132  | 438.682704      | 858.347567     | 429.677421       | S    | 678.366847  | 339.687062      | 661.340298  | 331.173787       | 660.356282     | 330.681779       | 6  |
| 10 | 1005.400725 | 503.204001      | 987.390160     | 494.198718       | E    | 591.334819  | 296.171048      | 574.308270  | 287.657773       | 573.324254     | 287.165765       | 5  |
| 11 | 1118.484789 | 559.746033      | 1100.474224    | 550.740750       | I    | 462.292226  | 231.649751      | 445.265677  | 223.136477       | 444.281661     | 222.644469       | 4  |
| 12 | 1219.532468 | 610.269872      | 1201.521903    | 601.264590       | T    | 349.208162  | 175.107719      | 332.181613  | 166.594445       | 331.197597     | 166.102437       | 3  |
| 13 | 1320.580147 | 660.793712      | 1302.569582    | 651.788429       | T    | 248.160483  | 124.583879      | 231.133934  | 116.070605       | 230.149918     | 115.578597       | 2  |
| 14 |             |                 |                |                  | K    | 147.112804  | 74.060040       | 130.086255  | 65.546765        |                |                  | 1  |

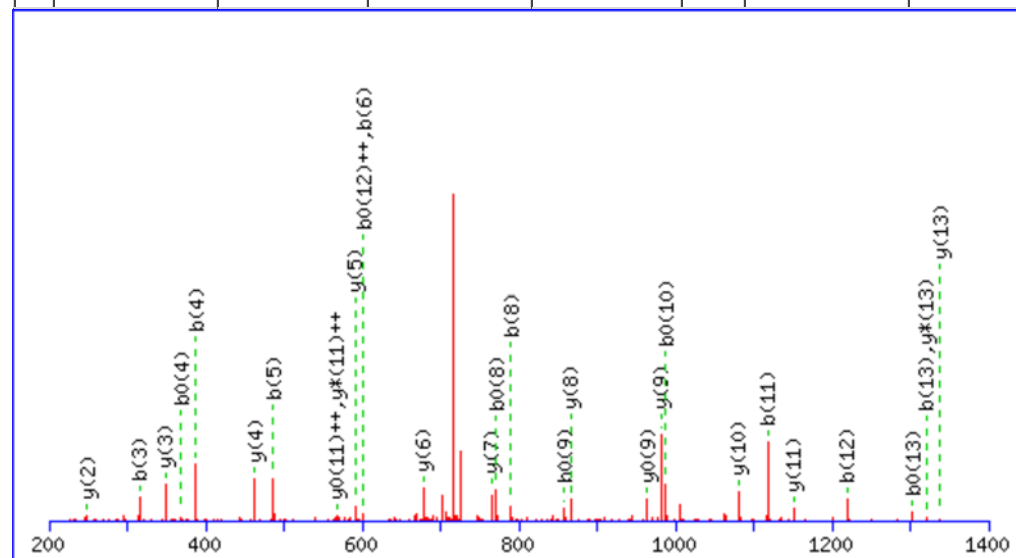

## Peptide View

MS/MS Fragmentation of **AADDTWEPFASGK**

Found in **IPI00022432**, Tax\_Id=9606 Gene\_Symbol=TTR Transthyretin

**Experiment:** 18 - NOPA3 **Fraction:** NOPA3

Match to Query 9782: 1393.616248 from(697.815400,2+)

Title: OECHL100317\_17.15538.15538.2.dta

Data file \\Boromir\masse\Data LTQ-Orbitrap\Chrystelle Lacroix\Etude clinique sJPU\OECHL100317\_17.raw

**Monoisotopic mass of neutral peptide Mr(calc):** 1393.615005 **Fixed modifications:** Carbamidomethyl (C) (apply to specified residues or termini only) **Ions Score:** 75

**Expect:** 2e-006 **Matches :** 21/112 fragment ions using 35 most intense peaks ([help](#))

| #  | b                  | b <sup>++</sup> | b <sup>0</sup>    | b <sup>0++</sup> | Seq. | y                  | y <sup>++</sup> | y*          | y <sup>*++</sup>  | y <sup>0</sup> | y <sup>0++</sup>  | #  |
|----|--------------------|-----------------|-------------------|------------------|------|--------------------|-----------------|-------------|-------------------|----------------|-------------------|----|
| 1  | 72.044390          | 36.525833       |                   |                  | A    |                    |                 |             |                   |                |                   | 13 |
| 2  | 143.081504         | 72.044390       |                   |                  | A    | 1323.585173        | 662.296225      | 1306.558624 | 653.782950        | 1305.574608    | 653.290942        | 12 |
| 3  | <b>258.108447</b>  | 129.557862      | 240.097882        | 120.552579       | D    | <b>1252.548059</b> | 626.777668      | 1235.521510 | 618.264393        | 1234.537494    | 617.772385        | 11 |
| 4  | <b>373.135390</b>  | 187.071333      | 355.124825        | 178.066051       | D    | <b>1137.521116</b> | 569.264196      | 1120.494567 | <b>560.750922</b> | 1119.510551    | <b>560.258914</b> | 10 |
| 5  | <b>474.183069</b>  | 237.595173      | <b>456.172504</b> | 228.589890       | T    | <b>1022.494173</b> | 511.750725      | 1005.467624 | 503.237450        | 1004.483608    | 502.745442        | 9  |
| 6  | <b>660.262382</b>  | 330.634829      | 642.251817        | 321.629547       | W    | <b>921.446494</b>  | 461.226885      | 904.419945  | 452.713611        | 903.435929     | 452.221603        | 8  |
| 7  | <b>789.304975</b>  | 395.156126      | <b>771.294410</b> | 386.150843       | E    | <b>735.367181</b>  | 368.187229      | 718.340632  | 359.673954        | 717.356616     | 359.181946        | 7  |
| 8  | 886.357739         | 443.682508      | 868.347174        | 434.677225       | P    | <b>606.324588</b>  | 303.665932      | 589.298039  | 295.152658        | 588.314023     | 294.660650        | 6  |
| 9  | 1033.426153        | 517.216715      | 1015.415588       | 508.211432       | F    | <b>509.271824</b>  | 255.139550      | 492.245275  | 246.626275        | 491.261259     | 246.134267        | 5  |
| 10 | <b>1104.463267</b> | 552.735272      | 1086.452702       | 543.729989       | A    | <b>362.203410</b>  | 181.605343      | 345.176861  | 173.092068        | 344.192845     | 172.600060        | 4  |
| 11 | <b>1191.495295</b> | 596.251286      | 1173.484730       | 587.246003       | S    | <b>291.166296</b>  | 146.086786      | 274.139747  | 137.573512        | 273.155731     | 137.081504        | 3  |
| 12 | 1248.516759        | 624.762018      | 1230.506194       | 615.756735       | G    | <b>204.134268</b>  | 102.570772      | 187.107719  | 94.057497         |                |                   | 2  |
| 13 |                    |                 |                   |                  | K    | 147.112804         | 74.060040       | 130.086255  | 65.546765         |                |                   | 1  |

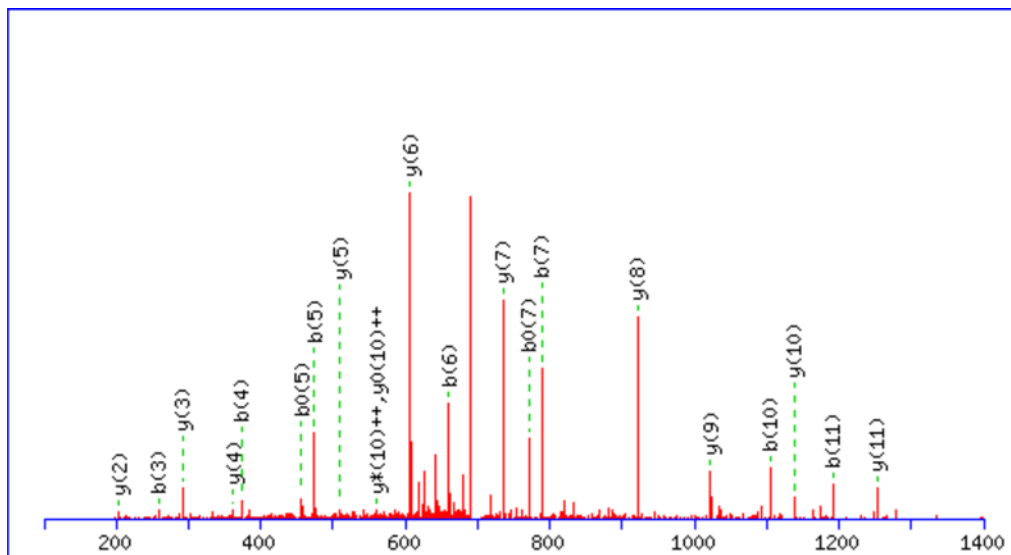

## Peptide View

MS/MS Fragmentation of **SFCDLTDEWR**

Found in **IPI00010193**, Tax\_Id=9606 Gene\_Symbol=IFNAR2 Isoform 1 of Interferon-alpha/beta receptor beta chain

**Experiment:** 18 - NOPA3 **Fraction:** NOPA3

Match to Query 9167: 1327.549248 from(664.781900,2+)

Title: OECHL100317\_17.17344.17344.2.dta

Data file \\Boromir\masse\Data LTQ-Orbitrap\Chrystelle Lacroix\Etude clinique sJPU\OECHL100317\_17.raw

**Monoisotopic mass of neutral peptide Mr(calc):** 1327.550308 **Fixed modifications:** Carbamidomethyl (C) (apply to specified residues or termini only) **Ions Score:** 58

**Expect:** 3.3e-005 **Matches :** 11/86 fragment ions using 11 most intense peaks ([help](#))

| # | b          | b <sup>++</sup> | b <sup>0</sup>    | b <sup>0++</sup> | Seq. | y                  | y <sup>++</sup>   | y*                 | y <sup>*++</sup> | y <sup>0</sup> | y <sup>0++</sup> | #  |
|---|------------|-----------------|-------------------|------------------|------|--------------------|-------------------|--------------------|------------------|----------------|------------------|----|
| 1 | 88.039304  | 44.523290       | 70.028739         | 35.518008        | S    |                    |                   |                    |                  |                |                  | 10 |
| 2 | 235.107718 | 118.057497      | 217.097153        | 109.052214       | F    | 1241.525550        | 621.266413        | 1224.499001        | 612.753138       | 1223.514985    | 612.261130       | 9  |
| 3 | 395.138367 | 198.072821      | 377.127802        | 189.067539       | C    | <b>1094.457136</b> | <b>547.732206</b> | <b>1077.430587</b> | 539.218932       | 1076.446571    | 538.726924       | 8  |
| 4 | 510.165310 | 255.586293      | 492.154745        | 246.581010       | D    | <b>934.426487</b>  | 467.716882        | 917.399938         | 459.203607       | 916.415922     | 458.711599       | 7  |
| 5 | 623.249374 | 312.128325      | <b>605.238809</b> | 303.123043       | L    | <b>819.399544</b>  | 410.203410        | 802.372995         | 401.690135       | 801.388979     | 401.198127       | 6  |
| 6 | 724.297053 | 362.652165      | <b>706.286488</b> | 353.646882       | T    | <b>706.315480</b>  | 353.661378        | 689.288931         | 345.148103       | 688.304915     | 344.656095       | 5  |

|    |             |            |             |            |   |            |            |            |            |            |            |   |
|----|-------------|------------|-------------|------------|---|------------|------------|------------|------------|------------|------------|---|
| 7  | 839.323996  | 420.165636 | 821.313431  | 411.160353 | D | 605.267801 | 303.137539 | 588.241252 | 294.624264 | 587.257236 | 294.132256 | 4 |
| 8  | 968.366589  | 484.686933 | 950.356024  | 475.681650 | E | 490.240858 | 245.624067 | 473.214309 | 237.110792 | 472.230293 | 236.618784 | 3 |
| 9  | 1154.445902 | 577.726589 | 1136.435337 | 568.721306 | W | 361.198265 | 181.102770 | 344.171716 | 172.589496 |            |            | 2 |
| 10 |             |            |             |            | R | 175.118952 | 88.063114  | 158.092403 | 79.549839  |            |            | 1 |

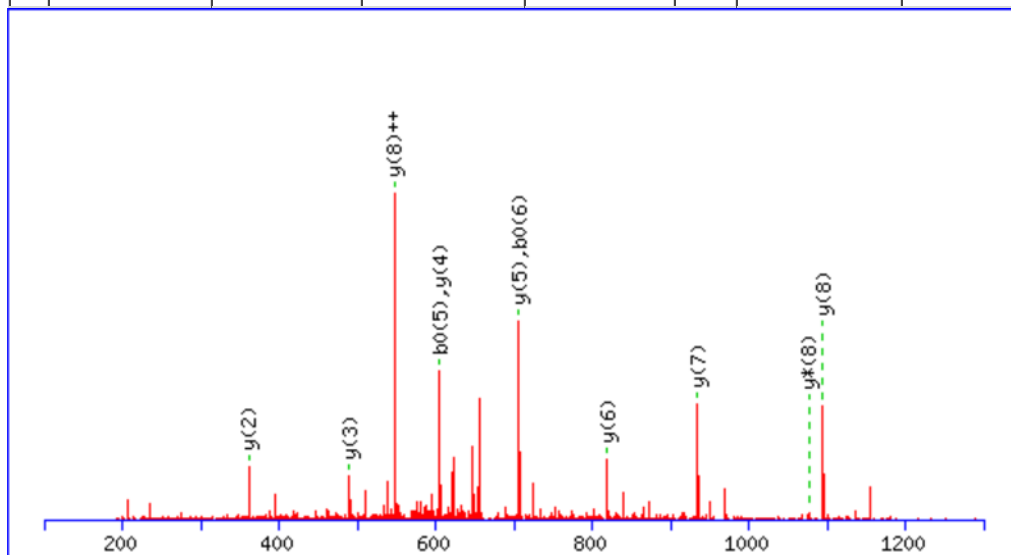

## Peptide View

MS/MS Fragmentation of **VTATGFQQCSLIDGR**

Found in **IP100333140**, Tax\_Id=9606 Gene\_Symbol=DNER Delta and Notch-like epidermal growth factor-related receptor

**Experiment:** 18 - NOPA3 **Fraction:** NOPA3

Match to Query 12705: 1651.800448 from(826.907500,2+)

Title: OECHL100317\_17.14059.14059.2.dta

Data file \\Boromir\masse\Data LTQ-Orbitrap\Chrystelle Lacroix\Etude clinique sJPU\OECHL100317\_17.raw

**Monoisotopic mass of neutral peptide Mr(calc):** 1651.798828 **Fixed modifications:** Carbamidomethyl (C) (apply to specified residues or termini only) **Ions Score:** 70

**Expect:** 1.2e-005 **Matches :** 19/150 fragment ions using 28 most intense peaks ([help](#))

| # | b          | b <sup>++</sup> | b <sup>*</sup> | b <sup>***</sup> | b <sup>0</sup> | b <sup>0++</sup> | Seq. | y           | y <sup>++</sup> | y <sup>*</sup> | y <sup>***</sup> | y <sup>0</sup> | y <sup>0++</sup> | #  |
|---|------------|-----------------|----------------|------------------|----------------|------------------|------|-------------|-----------------|----------------|------------------|----------------|------------------|----|
| 1 | 100.075690 | 50.541483       |                |                  |                |                  | V    |             |                 |                |                  |                |                  | 15 |
| 2 | 201.123369 | 101.065322      |                |                  | 183.112804     | 92.060040        | T    | 1553.737670 | 777.372473      | 1536.711121    | 768.859198       | 1535.727105    | 768.367190       | 14 |

|    |                    |            |             |            |                   |            |          |                    |                   |                   |                   |             |            |           |
|----|--------------------|------------|-------------|------------|-------------------|------------|----------|--------------------|-------------------|-------------------|-------------------|-------------|------------|-----------|
| 3  | <b>272.160483</b>  | 136.583879 |             |            | 254.149918        | 127.578597 | <b>A</b> | <b>1452.689991</b> | <b>726.848633</b> | 1435.663442       | 718.335359        | 1434.679426 | 717.843351 | <b>13</b> |
| 4  | <b>373.208162</b>  | 187.107719 |             |            | 355.197597        | 178.102437 | <b>T</b> | 1381.652877        | <b>691.330076</b> | 1364.626328       | 682.816802        | 1363.642312 | 682.324794 | <b>12</b> |
| 5  | 430.229626         | 215.618451 |             |            | 412.219061        | 206.613169 | <b>G</b> | <b>1280.605198</b> | 640.806237        | 1263.578649       | 632.292962        | 1262.594633 | 631.800954 | <b>11</b> |
| 6  | 577.298040         | 289.152658 |             |            | <b>559.287475</b> | 280.147376 | <b>F</b> | <b>1223.583734</b> | 612.295505        | 1206.557185       | 603.782230        | 1205.573169 | 603.290222 | <b>10</b> |
| 7  | 705.356618         | 353.181947 | 688.330069  | 344.668673 | 687.346053        | 344.176665 | <b>Q</b> | <b>1076.515320</b> | 538.761298        | 1059.488771       | <b>530.248023</b> | 1058.504755 | 529.756015 | <b>9</b>  |
| 8  | 833.415196         | 417.211236 | 816.388647  | 408.697962 | 815.404631        | 408.205954 | <b>Q</b> | <b>948.456742</b>  | 474.732009        | <b>931.430193</b> | 466.218734        | 930.446177  | 465.726726 | <b>8</b>  |
| 9  | 993.445845         | 497.226561 | 976.419296  | 488.713286 | 975.435280        | 488.221278 | <b>C</b> | 820.398164         | 410.702720        | 803.371615        | 402.189445        | 802.387599  | 401.697437 | <b>7</b>  |
| 10 | 1080.477873        | 540.742575 | 1063.451324 | 532.229300 | 1062.467308       | 531.737292 | <b>S</b> | 660.367515         | 330.687395        | 643.340966        | 322.174121        | 642.356950  | 321.682113 | <b>6</b>  |
| 11 | <b>1193.561937</b> | 597.284607 | 1176.535388 | 588.771332 | 1175.551372       | 588.279324 | <b>L</b> | <b>573.335487</b>  | 287.171381        | 556.308938        | 278.658107        | 555.324922  | 278.166099 | <b>5</b>  |
| 12 | <b>1306.646001</b> | 653.826638 | 1289.619452 | 645.313364 | 1288.635436       | 644.821356 | <b>I</b> | <b>460.251423</b>  | 230.629349        | 443.224874        | 222.116075        | 442.240858  | 221.624067 | <b>4</b>  |
| 13 | <b>1421.672944</b> | 711.340110 | 1404.646395 | 702.826836 | 1403.662379       | 702.334827 | <b>D</b> | <b>347.167359</b>  | 174.087317        | 330.140810        | 165.574043        | 329.156794  | 165.082035 | <b>3</b>  |
| 14 | 1478.694408        | 739.850842 | 1461.667859 | 731.337567 | 1460.683843       | 730.845559 | <b>G</b> | <b>232.140416</b>  | 116.573846        | 215.113867        | 108.060571        |             |            | <b>2</b>  |
| 15 |                    |            |             |            |                   |            | <b>R</b> | 175.118952         | 88.063114         | 158.092403        | 79.549839         |             |            | <b>1</b>  |

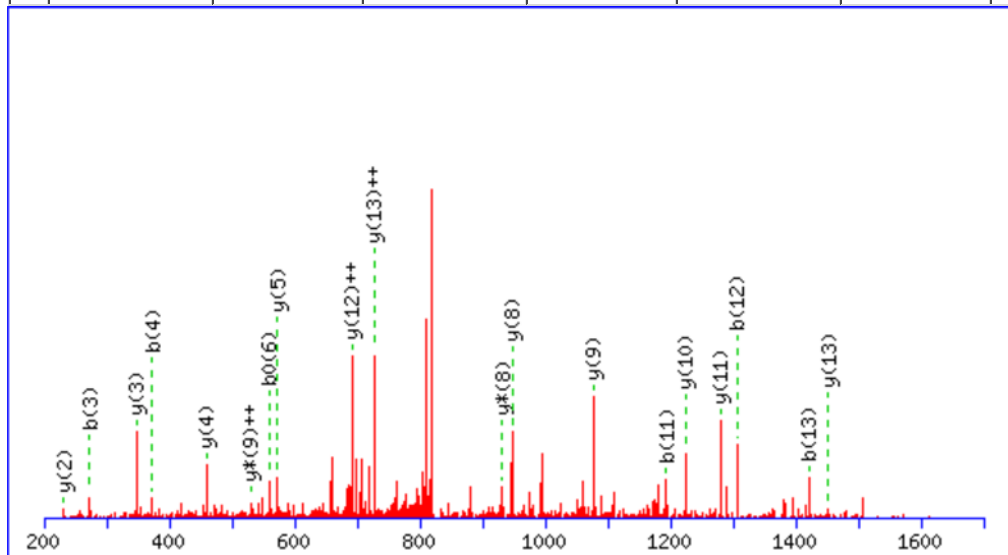

## Peptide View

MS/MS Fragmentation of **IGGIGTVPVGR**

Found in **IPI00014424**, Tax\_Id=9606 Gene\_Symbol=EEF1A2 Elongation factor 1-alpha 2

**Experiment:** 18 - NOPA3 **Fraction:** NOPA3

Match to Query 4412: 1024.602448 from(513.308500,2+)

Title: OECHL100317\_17.11138.11138.2.dta

Data file \\Boromir\masse\Data LTQ-Orbitrap\Chrystelle Lacroix\Etude clinique sJPU\OECHL100317\_17.raw

**Monoisotopic mass of neutral peptide Mr(calc):** 1024.602951 **Fixed modifications:** Carbamidomethyl (C) (apply to specified residues or termini only) **Ions Score:** 75

**Expect:** 8.6e-007 **Matches :** 17/80 fragment ions using 27 most intense peaks ([help](#))

| #  | b                 | b <sup>++</sup> | b <sup>0</sup>    | b <sup>0++</sup> | Seq. | y                 | y <sup>++</sup>   | y*                | y* <sup>++</sup> | y <sup>0</sup> | y <sup>0++</sup> | #  |
|----|-------------------|-----------------|-------------------|------------------|------|-------------------|-------------------|-------------------|------------------|----------------|------------------|----|
| 1  | 114.091340        | 57.549308       |                   |                  | I    |                   |                   |                   |                  |                |                  | 11 |
| 2  | 171.112804        | 86.060040       |                   |                  | G    | <b>912.526143</b> | 456.766710        | 895.499594        | 448.253435       | 894.515578     | 447.761427       | 10 |
| 3  | <b>228.134268</b> | 114.570772      |                   |                  | G    | <b>855.504679</b> | <b>428.255978</b> | 838.478130        | 419.742703       | 837.494114     | 419.250695       | 9  |
| 4  | <b>341.218332</b> | 171.112804      |                   |                  | I    | <b>798.483215</b> | 399.745246        | 781.456666        | 391.231971       | 780.472650     | 390.739963       | 8  |
| 5  | 398.239796        | 199.623536      |                   |                  | G    | <b>685.399151</b> | 343.203214        | 668.372602        | 334.689939       | 667.388586     | 334.197931       | 7  |
| 6  | 499.287475        | 250.147375      | 481.276910        | 241.142093       | T    | <b>628.377687</b> | <b>314.692482</b> | 611.351138        | 306.179207       | 610.367122     | 305.687199       | 6  |
| 7  | <b>598.355889</b> | 299.681583      | <b>580.345324</b> | 290.676300       | V    | <b>527.330008</b> | 264.168642        | 510.303459        | 255.655368       |                |                  | 5  |
| 8  | 695.408653        | 348.207965      | 677.398088        | 339.202682       | P    | <b>428.261594</b> | 214.634435        | 411.235045        | 206.121161       |                |                  | 4  |
| 9  | 794.477067        | 397.742172      | <b>776.466502</b> | 388.736889       | V    | 331.208830        | 166.108053        | <b>314.182281</b> | 157.594779       |                |                  | 3  |
| 10 | 851.498531        | 426.252904      | 833.487966        | 417.247621       | G    | <b>232.140416</b> | 116.573846        | 215.113867        | 108.060572       |                |                  | 2  |
| 11 |                   |                 |                   |                  | R    | <b>175.118952</b> | 88.063114         | 158.092403        | 79.549840        |                |                  | 1  |

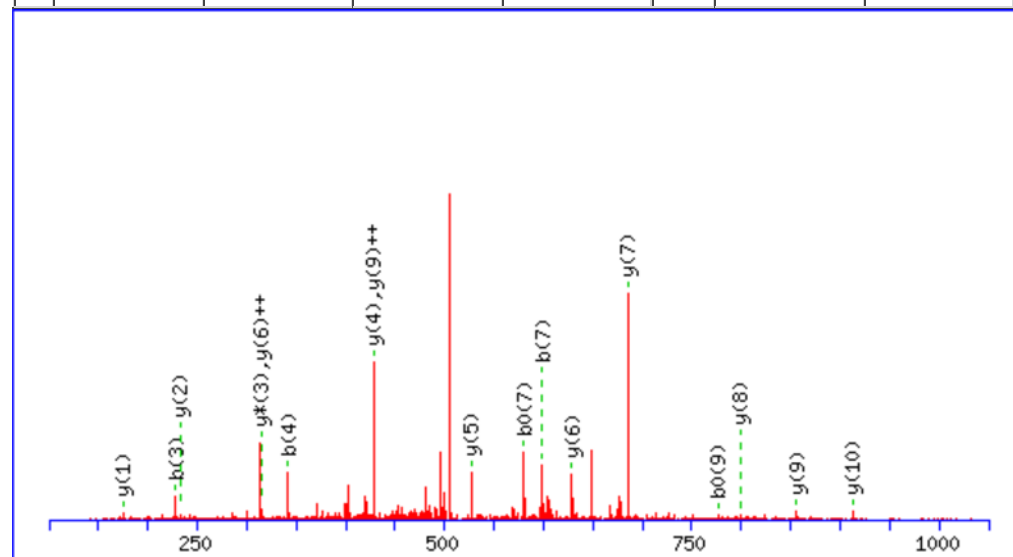

## Peptide View

MS/MS Fragmentation of **HSFKGEECPAGSHR**Found in **IP100021970**, Tax\_Id=9606 Gene\_Symbol=MGC31957;TNFRSF10C TNFRSF10C protein**Experiment:** 18 - NOPA3 **Fraction:** NOPA3

Match to Query 12009: 1597.704648 from(799.859600,2+)

Title: OECHL100317\_17.2203.2203.2.dta

Data file \\Boromir\masse\Data LTQ-Orbitrap\Chrystelle Lacroix\Etude clinique sJPU\OECHL100317\_17.raw

**Monoisotopic mass of neutral peptide Mr(calc):** 1597.705566**Fixed modifications:** Carbamidomethyl (C) (apply to specified residues or termini only)**Ions Score:** 68**Expect:** 1.1e-005**Matches :** 38/144 fragment ions using 65 most intense peaks ([help](#))

| #  | <b>b</b>           | <b>b<sup>++</sup></b> | <b>b<sup>*</sup></b> | <b>b<sup>*++</sup></b> | <b>b<sup>0</sup></b> | <b>b<sup>0++</sup></b> | Seq.     | <b>y</b>           | <b>y<sup>++</sup></b> | <b>y<sup>*</sup></b> | <b>y<sup>*++</sup></b> | <b>y<sup>0</sup></b> | <b>y<sup>0++</sup></b> | #  |
|----|--------------------|-----------------------|----------------------|------------------------|----------------------|------------------------|----------|--------------------|-----------------------|----------------------|------------------------|----------------------|------------------------|----|
| 1  | 138.066188         | 69.536732             |                      |                        |                      |                        | <b>H</b> |                    |                       |                      |                        |                      |                        | 14 |
| 2  | <b>225.098216</b>  | 113.052746            |                      |                        | 207.087651           | 104.047463             | <b>S</b> | <b>1461.653938</b> | <b>731.330607</b>     | 1444.627389          | <b>722.817333</b>      | <b>1443.643373</b>   | <b>722.325325</b>      | 13 |
| 3  | <b>372.166630</b>  | 186.586953            |                      |                        | <b>354.156065</b>    | 177.581671             | <b>F</b> | <b>1374.621910</b> | <b>687.814593</b>     | 1357.595361          | 679.301319             | 1356.611345          | 678.809311             | 12 |
| 4  | <b>500.261593</b>  | 250.634435            | <b>483.235044</b>    | 242.121160             | <b>482.251028</b>    | 241.629152             | <b>K</b> | <b>1227.553496</b> | <b>614.280386</b>     | <b>1210.526947</b>   | 605.767112             | 1209.542931          | 605.275104             | 11 |
| 5  | 557.283057         | 279.145167            | 540.256508           | 270.631892             | <b>539.272492</b>    | 270.139884             | <b>G</b> | <b>1099.458533</b> | <b>550.232905</b>     | 1082.431984          | 541.719630             | 1081.447968          | 541.227622             | 10 |
| 6  | <b>686.325650</b>  | 343.666463            | 669.299101           | 335.153189             | 668.315085           | 334.661181             | <b>E</b> | <b>1042.437069</b> | 521.722173            | 1025.410520          | 513.208898             | 1024.426504          | 512.716890             | 9  |
| 7  | 815.368243         | 408.187760            | 798.341694           | <b>399.674485</b>      | 797.357678           | <b>399.182477</b>      | <b>E</b> | <b>913.394476</b>  | 457.200876            | 896.367927           | 448.687602             | <b>895.383911</b>    | 448.195594             | 8  |
| 8  | <b>975.398892</b>  | 488.203084            | 958.372343           | 479.689810             | <b>957.388327</b>    | 479.197802             | <b>C</b> | <b>784.351883</b>  | 392.679580            | 767.325334           | 384.166305             | 766.341318           | 383.674297             | 7  |
| 9  | 1072.451656        | 536.729466            | 1055.425107          | 528.216192             | 1054.441091          | 527.724184             | <b>P</b> | <b>624.321234</b>  | <b>312.664255</b>     | 607.294685           | 304.150981             | 606.310669           | 303.658973             | 6  |
| 10 | <b>1143.488770</b> | 572.248023            | 1126.462221          | 563.734749             | 1125.478205          | 563.242741             | <b>A</b> | 527.268470         | 264.137873            | 510.241921           | 255.624598             | 509.257905           | 255.132590             | 5  |
| 11 | <b>1200.510234</b> | 600.758755            | 1183.483685          | 592.245481             | 1182.499669          | 591.753473             | <b>G</b> | <b>456.231356</b>  | 228.619316            | 439.204807           | 220.106041             | 438.220791           | 219.614033             | 4  |
| 12 | <b>1287.542262</b> | 644.274769            | 1270.515713          | 635.761495             | 1269.531697          | 635.269487             | <b>S</b> | <b>399.209892</b>  | 200.108584            | 382.183343           | 191.595309             | 381.199327           | 191.103301             | 3  |
| 13 | <b>1424.601174</b> | 712.804225            | 1407.574625          | 704.290951             | <b>1406.590609</b>   | 703.798943             | <b>H</b> | <b>312.177864</b>  | 156.592570            | 295.151315           | 148.079295             |                      |                        | 2  |
| 14 |                    |                       |                      |                        |                      |                        | <b>R</b> | 175.118952         | 88.063114             | 158.092403           | 79.549839              |                      |                        | 1  |

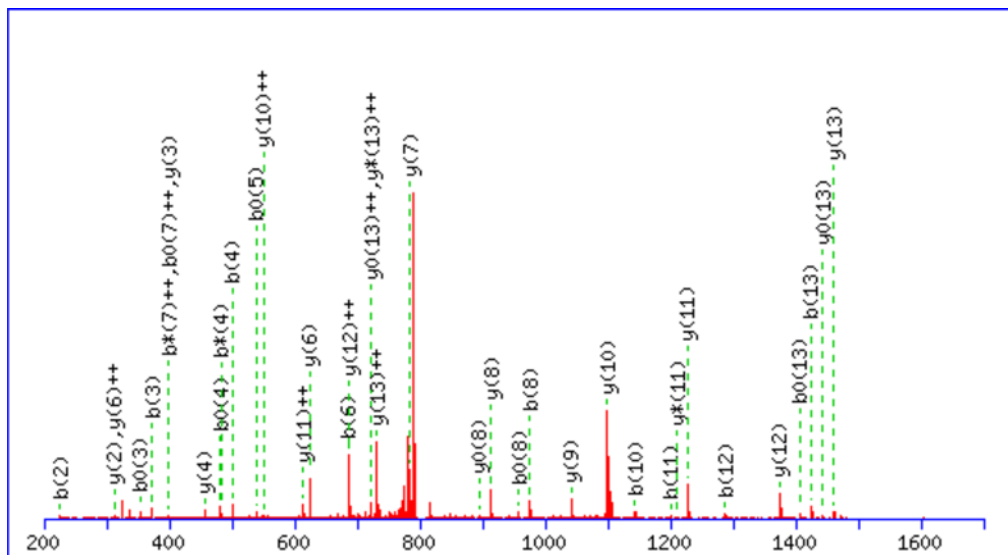

## Peptide View

MS/MS Fragmentation of **NIETIINTFHQYSVK**

Found in **IPI00027462**, Tax\_Id=9606 Gene\_Symbol=S100A9 Protein S100-A9

**Experiment:** 18 - NOPA3 **Fraction:** NOPA3

Match to Query 14091: 1805.932648 from(903.973600,2+)

Title: OECHL100317\_17.20309.20309.2.dta

Data file \\Boromir\masse\Data LTQ-Orbitrap\Chrystelle Lacroix\Etude clinique sJPU\OECHL100317\_17.raw

**Monoisotopic mass of neutral peptide Mr(calc):** 1805.931183 **Fixed modifications:** Carbamidomethyl (C) (apply to specified residues or termini only) **Ions Score:** 68

**Expect:** 2.1e-005 **Matches :** 24/160 fragment ions using 30 most intense peaks ([help](#))

| # | b                 | b <sup>++</sup> | b <sup>*</sup>    | b <sup>*++</sup> | b <sup>0</sup>    | b <sup>0++</sup>  | Seq. | y                  | y <sup>++</sup>   | y <sup>*</sup> | y <sup>*++</sup> | y <sup>0</sup> | y <sup>0++</sup> | #  |
|---|-------------------|-----------------|-------------------|------------------|-------------------|-------------------|------|--------------------|-------------------|----------------|------------------|----------------|------------------|----|
| 1 | 115.050203        | 58.028740       | 98.023654         | 49.515465        |                   |                   | N    |                    |                   |                |                  |                |                  | 15 |
| 2 | 228.134267        | 114.570771      | 211.107718        | 106.057497       |                   |                   | I    | 1692.895549        | 846.951413        | 1675.869000    | 838.438138       | 1674.884984    | 837.946130       | 14 |
| 3 | <b>357.176860</b> | 179.092068      | 340.150311        | 170.578793       | 339.166295        | 170.086785        | E    | <b>1579.811485</b> | <b>790.409381</b> | 1562.784936    | 781.896106       | 1561.800920    | 781.404098       | 13 |
| 4 | <b>458.224539</b> | 229.615907      | 441.197990        | 221.102633       | <b>440.213974</b> | 220.610625        | T    | <b>1450.768892</b> | <b>725.888084</b> | 1433.742343    | 717.374810       | 1432.758327    | 716.882802       | 12 |
| 5 | 571.308603        | 286.157940      | <b>554.282054</b> | 277.644665       | <b>553.298038</b> | 277.152657        | I    | <b>1349.721213</b> | 675.364245        | 1332.694664    | 666.850970       | 1331.710648    | 666.358962       | 11 |
| 6 | 684.392667        | 342.699972      | <b>667.366118</b> | 334.186697       | 666.382102        | <b>333.694689</b> | I    | <b>1236.637149</b> | 618.822213        | 1219.610600    | 610.308938       | 1218.626584    | 609.816930       | 10 |



|    |                    |            |                    |            |             |            |   |                    |            |             |                   |                   |                   |   |
|----|--------------------|------------|--------------------|------------|-------------|------------|---|--------------------|------------|-------------|-------------------|-------------------|-------------------|---|
| 7  | 798.435594         | 399.721435 | 781.409045         | 391.208161 | 780.425029  | 390.716153 | N | <b>1123.553085</b> | 562.280181 | 1106.526536 | <b>553.766906</b> | 1105.542520       | <b>553.274898</b> | 9 |
| 8  | 899.483273         | 450.245275 | 882.456724         | 441.732000 | 881.472708  | 441.239992 | T | <b>1009.510158</b> | 505.258717 | 992.483609  | 496.745443        | 991.499593        | 496.253435        | 8 |
| 9  | 1046.551687        | 523.779482 | 1029.525138        | 515.266207 | 1028.541122 | 514.774199 | F | 908.462479         | 454.734878 | 891.435930  | 446.221603        | 890.451914        | 445.729595        | 7 |
| 10 | 1183.610599        | 592.308938 | 1166.584050        | 583.795663 | 1165.600034 | 583.303655 | H | <b>761.394065</b>  | 381.200671 | 744.367516  | 372.687396        | 743.383500        | 372.195388        | 6 |
| 11 | <b>1311.669177</b> | 656.338227 | 1294.642628        | 647.824952 | 1293.658612 | 647.332944 | Q | <b>624.335153</b>  | 312.671215 | 607.308604  | 304.157940        | <b>606.324588</b> | 303.665932        | 5 |
| 12 | <b>1474.732506</b> | 737.869891 | 1457.705957        | 729.356617 | 1456.721941 | 728.864609 | Y | 496.276575         | 248.641926 | 479.250026  | 240.128651        | 478.266010        | 239.636643        | 4 |
| 13 | 1561.764534        | 781.385905 | 1544.737985        | 772.872631 | 1543.753969 | 772.380623 | S | <b>333.213246</b>  | 167.110261 | 316.186697  | 158.596987        | 315.202681        | 158.104979        | 3 |
| 14 | 1660.832948        | 830.920112 | <b>1643.806399</b> | 822.406838 | 1642.822383 | 821.914830 | V | 246.181218         | 123.594247 | 229.154669  | 115.080973        |                   |                   | 2 |
| 15 |                    |            |                    |            |             |            | K | 147.112804         | 74.060040  | 130.086255  | 65.546765         |                   |                   | 1 |

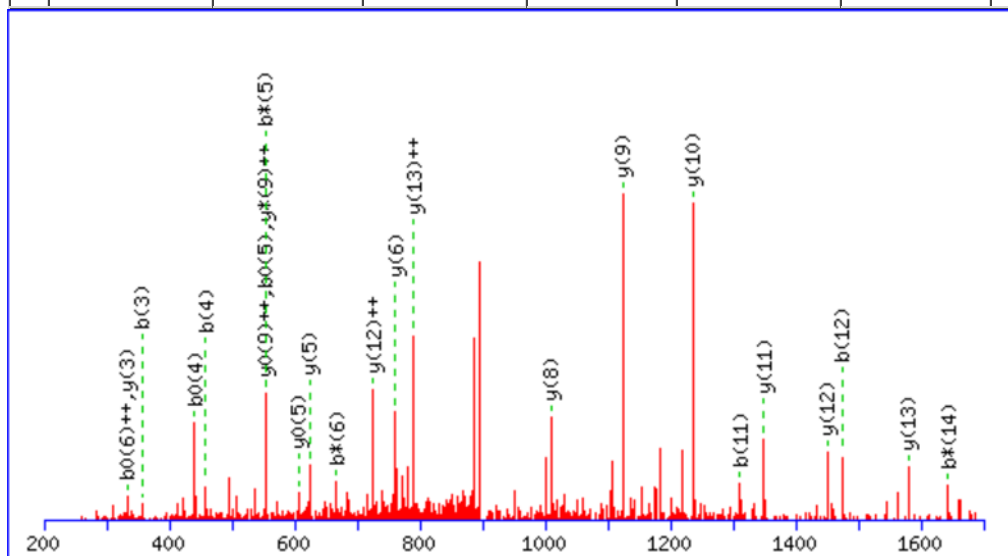

## Peptide View

MS/MS Fragmentation of **LLIYDASNLETGVPSR**

Found in **IP100003111**, Tax\_Id=9606 Gene\_Symbol=LOC652694 Ig kappa chain V-I region AU

**Experiment:** 18 - NOPA3 **Fraction:** NOPA3

Match to Query 13658: 1746.917648 from(874.466100,2+)

Title: OECHL100317\_17.17469.17469.2.dta

Data file \\Boromir\masse\Data LTQ-Orbitrap\Chrystelle Lacroix\Etude clinique sJPU\OECHL100317\_17.raw

**Monoisotopic mass of neutral peptide Mr(calc):** 1746.915192**Fixed modifications:** Carbamidomethyl (C) (apply to specified residues or termini only)**Ions Score:** 79

**Expect:** 1.2e-006**Matches :** 34/156 fragment ions using 59 most intense peaks ([help](#))

| #  | b           | b <sup>++</sup> | b*          | b <sup>***</sup> | b <sup>0</sup> | b <sup>0++</sup> | Seq. | y           | y <sup>++</sup> | y*          | y <sup>***</sup> | y <sup>0</sup> | y <sup>0++</sup> | #  |
|----|-------------|-----------------|-------------|------------------|----------------|------------------|------|-------------|-----------------|-------------|------------------|----------------|------------------|----|
| 1  | 114.091340  | 57.549308       |             |                  |                |                  | L    |             |                 |             |                  |                |                  | 16 |
| 2  | 227.175404  | 114.091340      |             |                  |                |                  | L    | 1634.838427 | 817.922852      | 1617.811878 | 809.409577       | 1616.827862    | 808.917569       | 15 |
| 3  | 340.259468  | 170.633372      |             |                  |                |                  | I    | 1521.754363 | 761.380820      | 1504.727814 | 752.867545       | 1503.743798    | 752.375537       | 14 |
| 4  | 503.322797  | 252.165036      |             |                  |                |                  | Y    | 1408.670299 | 704.838788      | 1391.643750 | 696.325513       | 1390.659734    | 695.833505       | 13 |
| 5  | 618.349740  | 309.678508      |             |                  | 600.339175     | 300.673226       | D    | 1245.606970 | 623.307123      | 1228.580421 | 614.793849       | 1227.596405    | 614.301841       | 12 |
| 6  | 689.386854  | 345.197065      |             |                  | 671.376289     | 336.191782       | A    | 1130.580027 | 565.793652      | 1113.553478 | 557.280377       | 1112.569462    | 556.788369       | 11 |
| 7  | 776.418882  | 388.713079      |             |                  | 758.408317     | 379.707796       | S    | 1059.542913 | 530.275095      | 1042.516364 | 521.761820       | 1041.532348    | 521.269812       | 10 |
| 8  | 890.461809  | 445.734542      | 873.435260  | 437.221268       | 872.451244     | 436.729260       | N    | 972.510885  | 486.759081      | 955.484336  | 478.245806       | 954.500320     | 477.753798       | 9  |
| 9  | 1003.545873 | 502.276574      | 986.519324  | 493.763300       | 985.535308     | 493.271292       | L    | 858.467958  | 429.737617      | 841.441409  | 421.224343       | 840.457393     | 420.732335       | 8  |
| 10 | 1132.588466 | 566.797871      | 1115.561917 | 558.284597       | 1114.577901    | 557.792588       | E    | 745.383894  | 373.195585      | 728.357345  | 364.682311       | 727.373329     | 364.190303       | 7  |
| 11 | 1233.636145 | 617.321710      | 1216.609596 | 608.808436       | 1215.625580    | 608.316428       | T    | 616.341301  | 308.674289      | 599.314752  | 300.161014       | 598.330736     | 299.669006       | 6  |
| 12 | 1290.657609 | 645.832442      | 1273.631060 | 637.319168       | 1272.647044    | 636.827160       | G    | 515.293622  | 258.150449      | 498.267073  | 249.637175       | 497.283057     | 249.145167       | 5  |
| 13 | 1389.726023 | 695.366649      | 1372.699474 | 686.853375       | 1371.715458    | 686.361367       | V    | 458.272158  | 229.639717      | 441.245609  | 221.126443       | 440.261593     | 220.634435       | 4  |
| 14 | 1486.778787 | 743.893032      | 1469.752238 | 735.379757       | 1468.768222    | 734.887749       | P    | 359.203744  | 180.105510      | 342.177195  | 171.592236       | 341.193179     | 171.100228       | 3  |
| 15 | 1573.810815 | 787.409046      | 1556.784266 | 778.895771       | 1555.800250    | 778.403763       | S    | 262.150980  | 131.579128      | 245.124431  | 123.065854       | 244.140415     | 122.573846       | 2  |
| 16 |             |                 |             |                  |                |                  | R    | 175.118952  | 88.063114       | 158.092403  | 79.549839        |                |                  | 1  |

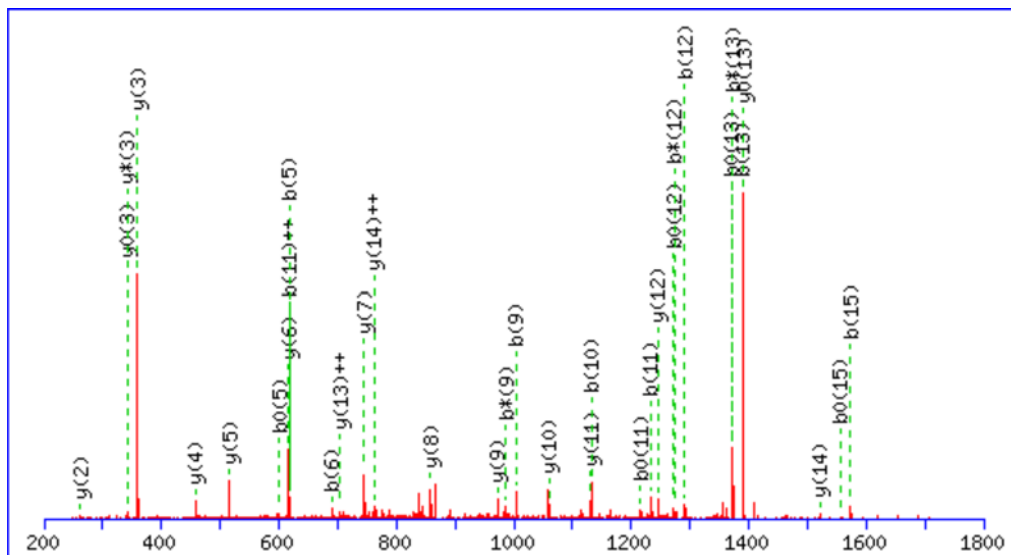

## Peptide View

MS/MS Fragmentation of **TGAVYVAEIGAK**

Found in **IPI00552937**, Tax\_Id=9606 Gene\_Symbol=NHLRC3 NHL repeat-containing protein 3

**Experiment:** 18 - NOPA3 **Fraction:** NOPA3

Match to Query 6942: 1177.634048 from(589.824300,2+)

Title: OECHL100317\_17.11674.11674.2.dta

Data file \\Boromir\masse\Data LTQ-Orbitrap\Chrystelle Lacroix\Etude clinique sJPU\OECHL100317\_17.raw

**Monoisotopic mass of neutral peptide Mr(calc):** 1177.634277 **Fixed modifications:** Carbamidomethyl (C) (apply to specified residues or termini only) **Ions Score:** 67

**Expect:** 1.2e-005 **Matches :** 18/102 fragment ions using 33 most intense peaks ([help](#))

| # | b          | b <sup>++</sup> | b <sup>0</sup> | b <sup>0++</sup> | Seq. | y           | y <sup>++</sup> | y <sup>*</sup> | y <sup>*++</sup> | y <sup>0</sup> | y <sup>0++</sup> | #  |
|---|------------|-----------------|----------------|------------------|------|-------------|-----------------|----------------|------------------|----------------|------------------|----|
| 1 | 102.054955 | 51.531116       | 84.044390      | 42.525833        | T    |             |                 |                |                  |                |                  | 12 |
| 2 | 159.076419 | 80.041847       | 141.065854     | 71.036565        | G    | 1077.593888 | 539.300582      | 1060.567339    | 530.787308       | 1059.583323    | 530.295300       | 11 |
| 3 | 230.113533 | 115.560404      | 212.102968     | 106.555122       | A    | 1020.572424 | 510.789850      | 1003.545875    | 502.276576       | 1002.561859    | 501.784568       | 10 |
| 4 | 329.181947 | 165.094611      | 311.171382     | 156.089329       | V    | 949.535310  | 475.271293      | 932.508761     | 466.758019       | 931.524745     | 466.266011       | 9  |
| 5 | 492.245276 | 246.626276      | 474.234711     | 237.620994       | Y    | 850.466896  | 425.737086      | 833.440347     | 417.223812       | 832.456331     | 416.731804       | 8  |
| 6 | 591.313690 | 296.160483      | 573.303125     | 287.155201       | V    | 687.403567  | 344.205422      | 670.377018     | 335.692147       | 669.393002     | 335.200139       | 7  |

|    |                    |            |             |            |          |                   |            |                   |            |            |            |          |
|----|--------------------|------------|-------------|------------|----------|-------------------|------------|-------------------|------------|------------|------------|----------|
| 7  | <b>662.350804</b>  | 331.679040 | 644.340239  | 322.673758 | <b>A</b> | 588.335153        | 294.671215 | <b>571.308604</b> | 286.157940 | 570.324588 | 285.665932 | <b>6</b> |
| 8  | 791.393397         | 396.200337 | 773.382832  | 387.195054 | <b>E</b> | <b>517.298039</b> | 259.152658 | 500.271490        | 250.639383 | 499.287474 | 250.147375 | <b>5</b> |
| 9  | <b>904.477461</b>  | 452.742369 | 886.466896  | 443.737086 | <b>I</b> | <b>388.255446</b> | 194.631361 | 371.228897        | 186.118087 |            |            | <b>4</b> |
| 10 | <b>961.498925</b>  | 481.253101 | 943.488360  | 472.247818 | <b>G</b> | <b>275.171382</b> | 138.089329 | 258.144833        | 129.576055 |            |            | <b>3</b> |
| 11 | <b>1032.536039</b> | 516.771658 | 1014.525474 | 507.766375 | <b>A</b> | <b>218.149918</b> | 109.578597 | 201.123369        | 101.065322 |            |            | <b>2</b> |
| 12 |                    |            |             |            | <b>K</b> | 147.112804        | 74.060040  | 130.086255        | 65.546765  |            |            | <b>1</b> |

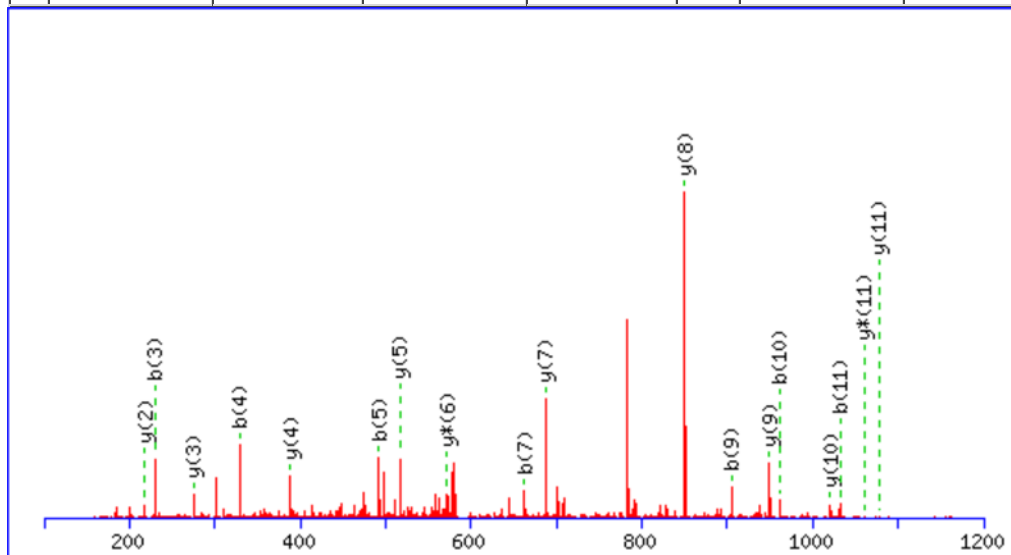

## Peptide View

MS/MS Fragmentation of **YSGSEGSTQTLTKGELK**

Found in **IPI00017526**, Tax\_Id=9606 Gene\_Symbol=S100P Protein S100-P

**Experiment:** 18 - NOPA3 **Fraction:** NOPA3

Match to Query 13938: 1784.878448 from(893.446500,2+)

Title: OECHL100317\_17.7792.7792.2.dta

Data file \\Boromir\masse\Data LTQ-Orbitrap\Chrystelle Lacroix\Etude clinique sJPU\OECHL100317\_17.raw

**Monoisotopic mass of neutral peptide Mr(calc):** 1784.879211 **Fixed modifications:** Carbamidomethyl (C) (apply to specified residues or termini only) **Ions Score:** 61

**Expect:** 0.00012 **Matches :** 34/170 fragment ions using 60 most intense peaks ([help](#))

| # | <b>b</b> | <b>b<sup>++</sup></b> | <b>b<sup>*</sup></b> | <b>b<sup>*++</sup></b> | <b>b<sup>0</sup></b> | <b>b<sup>0++</sup></b> | Seq. | <b>y</b> | <b>y<sup>++</sup></b> | <b>y<sup>*</sup></b> | <b>y<sup>*++</sup></b> | <b>y<sup>0</sup></b> | <b>y<sup>0++</sup></b> | # |
|---|----------|-----------------------|----------------------|------------------------|----------------------|------------------------|------|----------|-----------------------|----------------------|------------------------|----------------------|------------------------|---|
|---|----------|-----------------------|----------------------|------------------------|----------------------|------------------------|------|----------|-----------------------|----------------------|------------------------|----------------------|------------------------|---|

|    |                    |                   |                    |                   |                    |                   |   |                    |                   |                    |            |                    |            |  |    |
|----|--------------------|-------------------|--------------------|-------------------|--------------------|-------------------|---|--------------------|-------------------|--------------------|------------|--------------------|------------|--|----|
| 1  | 164.070605         | 82.538940         |                    |                   |                    |                   | Y |                    |                   |                    |            |                    |            |  | 17 |
| 2  | 251.102633         | 126.054954        |                    |                   | 233.092068         | 117.049672        | S | <b>1622.823172</b> | <b>811.915224</b> | 1605.796623        | 803.401950 | 1604.812607        | 802.909941 |  | 16 |
| 3  | 308.124097         | 154.565687        |                    |                   | 290.113532         | 145.560404        | G | 1535.791144        | <b>768.399210</b> | 1518.764595        | 759.885936 | 1517.780579        | 759.393928 |  | 15 |
| 4  | <b>395.156125</b>  | 198.081701        |                    |                   | 377.145560         | 189.076418        | S | 1478.769680        | <b>739.888478</b> | 1461.743131        | 731.375204 | 1460.759115        | 730.883195 |  | 14 |
| 5  | <b>524.198718</b>  | 262.602997        |                    |                   | <b>506.188153</b>  | 253.597715        | E | <b>1391.737652</b> | <b>696.372464</b> | <b>1374.711103</b> | 687.859190 | <b>1373.727087</b> | 687.367182 |  | 13 |
| 6  | 581.220182         | 291.113729        |                    |                   | 563.209617         | 282.108447        | G | <b>1262.695059</b> | <b>631.851167</b> | 1245.668510        | 623.337893 | 1244.684494        | 622.845885 |  | 12 |
| 7  | 668.252210         | 334.629743        |                    |                   | 650.241645         | <b>325.624461</b> | S | <b>1205.673595</b> | 603.340436        | 1188.647046        | 594.827161 | 1187.663030        | 594.335153 |  | 11 |
| 8  | 769.299889         | 385.153583        |                    |                   | 751.289324         | 376.148300        | T | <b>1118.641567</b> | 559.824421        | 1101.615018        | 551.311147 | 1100.631002        | 550.819139 |  | 10 |
| 9  | 897.358467         | 449.182872        | 880.331918         | 440.669597        | 879.347902         | 440.177589        | Q | <b>1017.593888</b> | 509.300582        | <b>1000.567339</b> | 500.787307 | <b>999.583323</b>  | 500.295299 |  | 9  |
| 10 | 998.406146         | 499.706711        | 981.379597         | 491.193437        | 980.395581         | 490.701429        | T | 889.535310         | 445.271293        | 872.508761         | 436.758018 | 871.524745         | 436.266010 |  | 8  |
| 11 | 1111.490210        | <b>556.248743</b> | 1094.463661        | 547.735469        | <b>1093.479645</b> | 547.243461        | L | <b>788.487631</b>  | <b>394.747453</b> | 771.461082         | 386.234179 | 770.477066         | 385.742171 |  | 7  |
| 12 | 1212.537889        | 606.772583        | 1195.511340        | 598.259308        | <b>1194.527324</b> | 597.767300        | T | <b>675.403567</b>  | 338.205421        | 658.377018         | 329.692147 | 657.393002         | 329.200139 |  | 6  |
| 13 | 1340.632852        | 670.820064        | 1323.606303        | 662.306790        | 1322.622287        | 661.814782        | K | <b>574.355888</b>  | 287.681582        | 557.329339         | 279.168307 | <b>556.345323</b>  | 278.676299 |  | 5  |
| 14 | 1397.654316        | 699.330796        | 1380.627767        | 690.817522        | 1379.643751        | 690.325514        | G | <b>446.260925</b>  | 223.634100        | 429.234376         | 215.120826 | 428.250360         | 214.628818 |  | 4  |
| 15 | <b>1526.696909</b> | 763.852093        | 1509.670360        | 755.338818        | 1508.686344        | 754.846810        | E | 389.239461         | 195.123368        | 372.212912         | 186.610094 | 371.228896         | 186.118086 |  | 3  |
| 16 | <b>1639.780973</b> | 820.394124        | <b>1622.754424</b> | <b>811.880850</b> | 1621.770408        | <b>811.388842</b> | L | <b>260.196868</b>  | 130.602072        | 243.170319         | 122.088797 |                    |            |  | 2  |
| 17 |                    |                   |                    |                   |                    |                   | K | 147.112804         | 74.060040         | 130.086255         | 65.546765  |                    |            |  | 1  |

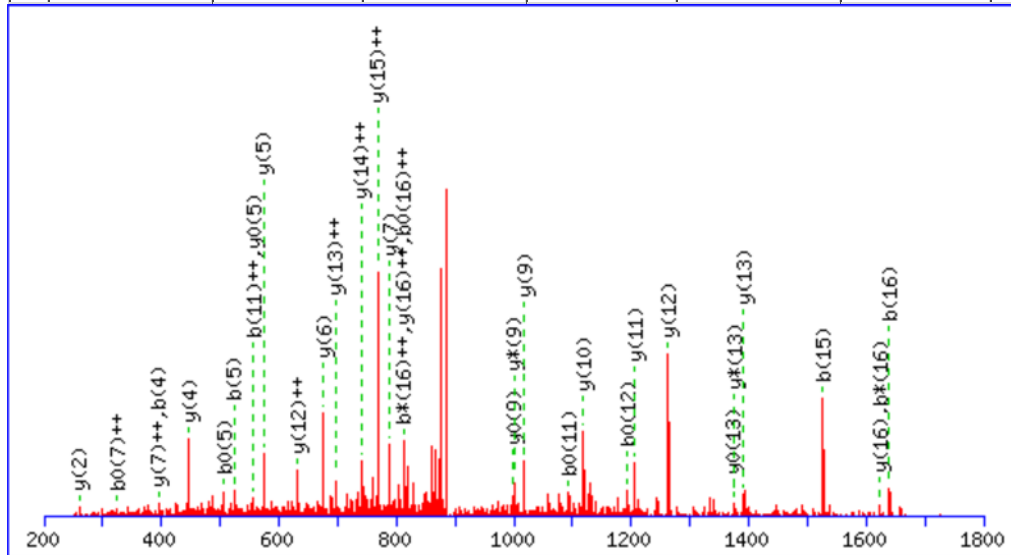

## Peptide View

MS/MS Fragmentation of **VATQEGKEITCR**

Found in **IPI00031564**, Tax\_Id=9606 Gene\_Symbol=GGCT Isoform 1 of Gamma-glutamylcyclotransferase

**Experiment:** 18 - NOPA3 **Fraction:** NOPA3

Match to Query 9763: 1390.687048 from(696.350800,2+)

Title: OECHL100317\_17.3603.3603.2.dta

Data file \\Boromir\masse\Data LTQ-Orbitrap\Chrystelle Lacroix\Etude clinique sJPU\OECHL100317\_17.raw

**Monoisotopic mass of neutral peptide Mr(calc):** 1390.687454 **Fixed modifications:** Carbamidomethyl (C) (apply to specified residues or termini only) **Ions Score:** 61

**Expect:** 0.0001 **Matches :** 18/118 fragment ions using 33 most intense peaks ([help](#))

| #  | b                  | b <sup>++</sup> | b <sup>*</sup>    | b <sup>*++</sup> | b <sup>0</sup>    | b <sup>0++</sup> | Seq. | y                  | y <sup>++</sup>   | y <sup>*</sup>     | y <sup>*++</sup>  | y <sup>0</sup> | y <sup>0++</sup> | #  |
|----|--------------------|-----------------|-------------------|------------------|-------------------|------------------|------|--------------------|-------------------|--------------------|-------------------|----------------|------------------|----|
| 1  | 100.075690         | 50.541483       |                   |                  |                   |                  | V    |                    |                   |                    |                   |                |                  | 12 |
| 2  | 171.112804         | 86.060040       |                   |                  |                   |                  | A    | 1292.626328        | 646.816802        | 1275.599779        | 638.303528        | 1274.615763    | 637.811520       | 11 |
| 3  | 272.160483         | 136.583879      |                   |                  | 254.149918        | 127.578597       | T    | <b>1221.589214</b> | <b>611.298245</b> | 1204.562665        | 602.784971        | 1203.578649    | 602.292963       | 10 |
| 4  | 400.219061         | 200.613169      | <b>383.192512</b> | 192.099894       | <b>382.208496</b> | 191.607886       | Q    | <b>1120.541535</b> | <b>560.774406</b> | <b>1103.514986</b> | <b>552.261131</b> | 1102.530970    | 551.769123       | 9  |
| 5  | 529.261654         | 265.134465      | 512.235105        | 256.621191       | 511.251089        | 256.129183       | E    | <b>992.482957</b>  | 496.745117        | 975.456408         | 488.231842        | 974.472392     | 487.739834       | 8  |
| 6  | 586.283118         | 293.645197      | 569.256569        | 285.131923       | 568.272553        | 284.639915       | G    | <b>863.440364</b>  | 432.223820        | 846.413815         | 423.710546        | 845.429799     | 423.218538       | 7  |
| 7  | <b>714.378081</b>  | 357.692679      | 697.351532        | 349.179404       | 696.367516        | 348.687396       | K    | <b>806.418900</b>  | 403.713088        | 789.392351         | 395.199814        | 788.408335     | 394.707806       | 6  |
| 8  | 843.420674         | 422.213975      | 826.394125        | 413.700701       | 825.410109        | 413.208693       | E    | <b>678.323937</b>  | 339.665607        | 661.297388         | 331.152332        | 660.313372     | 330.660324       | 5  |
| 9  | 956.504738         | 478.756007      | 939.478189        | 470.242733       | 938.494173        | 469.750725       | I    | <b>549.281344</b>  | 275.144310        | 532.254795         | 266.631036        | 531.270779     | 266.139028       | 4  |
| 10 | <b>1057.552417</b> | 529.279847      | 1040.525868       | 520.766572       | 1039.541852       | 520.274564       | T    | <b>436.197280</b>  | 218.602278        | 419.170731         | 210.089003        | 418.186715     | 209.596995       | 3  |
| 11 | <b>1217.583066</b> | 609.295171      | 1200.556517       | 600.781897       | 1199.572501       | 600.289889       | C    | <b>335.149601</b>  | 168.078438        | 318.123052         | 159.565164        |                |                  | 2  |
| 12 |                    |                 |                   |                  |                   |                  | R    | 175.118952         | 88.063114         | 158.092403         | 79.549839         |                |                  | 1  |

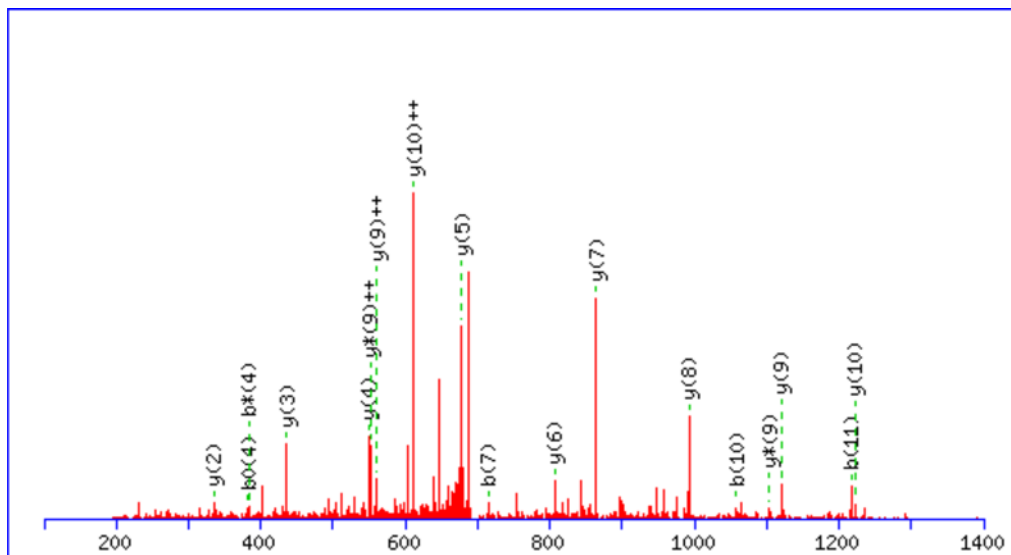

## Peptide View

MS/MS Fragmentation of **GLAEAAGPR**

Found in **IPI00290826**, Tax\_Id=9606 Gene\_Symbol=FAM174A Membrane protein FAM174A

**Experiment:** 18 - NOPA3 **Fraction:** NOPA3

Match to Query 1499: 840.445648 from(421.230100,2+)

Title: OECHL100317\_17.4131.4131.2.dta

Data file \\Boromir\masse\Data LTQ-Orbitrap\Chrystelle Lacroix\Etude clinique sJPU\OECHL100317\_17.raw

**Monoisotopic mass of neutral peptide Mr(calc):** 840.445343 **Fixed modifications:** Carbamidomethyl (C) (apply to specified residues or termini only) **Ions Score:** 51

**Expect:** 0.00051 **Matches :** 16/64 fragment ions using 28 most intense peaks ([help](#))

| # | b                 | b <sup>++</sup> | b <sup>0</sup> | b <sup>0++</sup> | Seq. | y                 | y <sup>++</sup>   | y*         | y <sup>*++</sup> | y <sup>0</sup> | y <sup>0++</sup> | # |
|---|-------------------|-----------------|----------------|------------------|------|-------------------|-------------------|------------|------------------|----------------|------------------|---|
| 1 | 58.028740         | 29.518008       |                |                  | G    |                   |                   |            |                  |                |                  | 9 |
| 2 | <b>171.112804</b> | 86.060040       |                |                  | L    | 784.431179        | 392.719228        | 767.404630 | 384.205953       | 766.420614     | 383.713945       | 8 |
| 3 | <b>242.149918</b> | 121.578597      |                |                  | A    | <b>671.347115</b> | <b>336.177196</b> | 654.320566 | 327.663921       | 653.336550     | 327.171913       | 7 |
| 4 | <b>371.192511</b> | 186.099894      | 353.181946     | 177.094611       | E    | <b>600.310001</b> | 300.658639        | 583.283452 | 292.145364       | 582.299436     | 291.653356       | 6 |
| 5 | <b>442.229625</b> | 221.618450      | 424.219060     | 212.613168       | A    | <b>471.267408</b> | 236.137342        | 454.240859 | 227.624067       |                |                  | 5 |
| 6 | <b>513.266739</b> | 257.137008      | 495.256174     | 248.131725       | A    | <b>400.230294</b> | <b>200.618785</b> | 383.203745 | 192.105510       |                |                  | 4 |

|   |            |            |            |            |   |            |            |            |            |  |  |   |
|---|------------|------------|------------|------------|---|------------|------------|------------|------------|--|--|---|
| 7 | 570.288203 | 285.647740 | 552.277638 | 276.642457 | G | 329.193180 | 165.100228 | 312.166631 | 156.586953 |  |  | 3 |
| 8 | 667.340967 | 334.174122 | 649.330402 | 325.168839 | P | 272.171716 | 136.589496 | 255.145167 | 128.076221 |  |  | 2 |
| 9 |            |            |            |            | R | 175.118952 | 88.063114  | 158.092403 | 79.549839  |  |  | 1 |

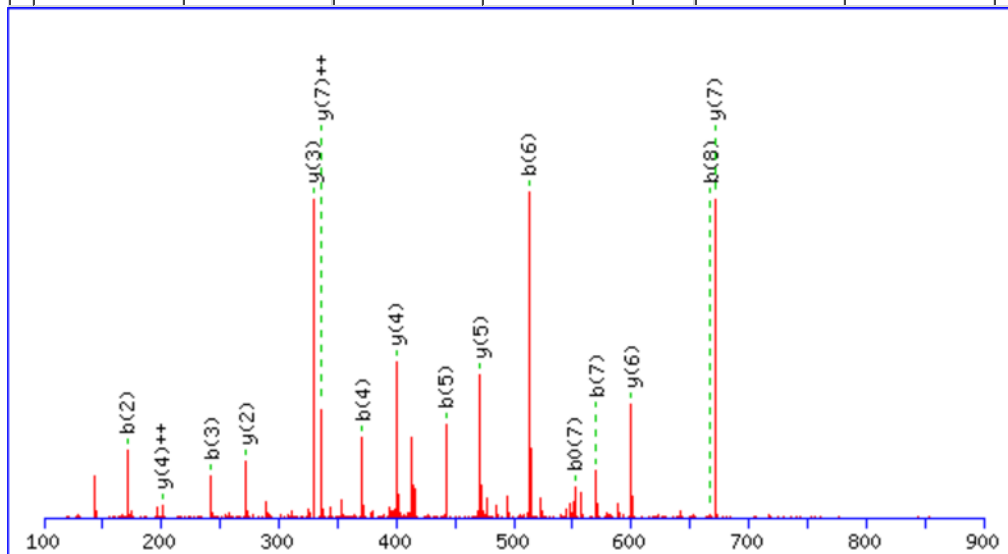

## Peptide View

MS/MS Fragmentation of **NKQDLINNITTYKK**

Found in **IP100220361**, Tax\_Id=9606 Gene\_Symbol=CALB1 Calbindin

**Experiment:** 18 - NOPA3 **Fraction:** NOPA3

Match to Query 14098: 1806.948048 from(904.481300,2+)

Title: OECHL100317\_17.10434.10434.2.dta

Data file \\Boromir\masse\Data LTQ-Orbitrap\Chrystelle Lacroix\Etude clinique sJPU\OECHL100317\_17.raw

**Monoisotopic mass of neutral peptide Mr(calc):** 1806.947540 **Fixed modifications:** Carbamidomethyl (C) (apply to specified residues or termini only) **Ions Score:** 54

**Expect:** 0.00037 **Matches :** 19/156 fragment ions using 32 most intense peaks ([help](#))

| # | b          | b <sup>++</sup> | b*         | b <sup>*++</sup> | b <sup>0</sup> | b <sup>0++</sup> | Seq. | y           | y <sup>++</sup> | y*          | y <sup>*++</sup> | y <sup>0</sup> | y <sup>0++</sup> | #  |
|---|------------|-----------------|------------|------------------|----------------|------------------|------|-------------|-----------------|-------------|------------------|----------------|------------------|----|
| 1 | 115.050203 | 58.028740       | 98.023654  | 49.515465        |                |                  | N    |             |                 |             |                  |                |                  | 15 |
| 2 | 243.145166 | 122.076221      | 226.118617 | 113.562947       |                |                  | K    | 1693.911927 | 847.459602      | 1676.885378 | 838.946327       | 1675.901362    | 838.454319       | 14 |
| 3 | 371.203744 | 186.105510      | 354.177195 | 177.592236       |                |                  | Q    | 1565.816964 | 783.412120      | 1548.790415 | 774.898846       | 1547.806399    | 774.406838       | 13 |



|    |                    |            |             |            |             |            |          |                    |            |             |                   |             |                   |           |
|----|--------------------|------------|-------------|------------|-------------|------------|----------|--------------------|------------|-------------|-------------------|-------------|-------------------|-----------|
| 4  | <b>486.230687</b>  | 243.618982 | 469.204138  | 235.105707 | 468.220122  | 234.613699 | <b>D</b> | <b>1437.758386</b> | 719.382831 | 1420.731837 | 710.869557        | 1419.747821 | 710.377548        | <b>12</b> |
| 5  | 599.314751         | 300.161014 | 582.288202  | 291.647739 | 581.304186  | 291.155731 | <b>L</b> | <b>1322.731443</b> | 661.869359 | 1305.704894 | 653.356085        | 1304.720878 | 652.864077        | <b>11</b> |
| 6  | <b>714.341694</b>  | 357.674485 | 697.315145  | 349.161211 | 696.331129  | 348.669203 | <b>D</b> | <b>1209.647379</b> | 605.327328 | 1192.620830 | 596.814053        | 1191.636814 | 596.322045        | <b>10</b> |
| 7  | 827.425758         | 414.216517 | 810.399209  | 405.703243 | 809.415193  | 405.211235 | <b>I</b> | <b>1094.620436</b> | 547.813856 | 1077.593887 | <b>539.300582</b> | 1076.609871 | <b>538.808573</b> | <b>9</b>  |
| 8  | 941.468685         | 471.237981 | 924.442136  | 462.724706 | 923.458120  | 462.232698 | <b>N</b> | <b>981.536372</b>  | 491.271824 | 964.509823  | 482.758550        | 963.525807  | 482.266542        | <b>8</b>  |
| 9  | 1055.511612        | 528.259444 | 1038.485063 | 519.746170 | 1037.501047 | 519.254162 | <b>N</b> | 867.493445         | 434.250361 | 850.466896  | 425.737086        | 849.482880  | 425.245078        | <b>7</b>  |
| 10 | <b>1168.595676</b> | 584.801476 | 1151.569127 | 576.288202 | 1150.585111 | 575.796193 | <b>I</b> | 753.450518         | 377.228897 | 736.423969  | 368.715623        | 735.439953  | 368.223615        | <b>6</b>  |
| 11 | 1269.643355        | 635.325315 | 1252.616806 | 626.812041 | 1251.632790 | 626.320033 | <b>T</b> | <b>640.366454</b>  | 320.686865 | 623.339905  | 312.173591        | 622.355889  | 311.681583        | <b>5</b>  |
| 12 | 1370.691034        | 685.849155 | 1353.664485 | 677.335881 | 1352.680469 | 676.843872 | <b>T</b> | <b>539.318775</b>  | 270.163026 | 522.292226  | 261.649751        | 521.308210  | 261.157743        | <b>4</b>  |
| 13 | <b>1533.754363</b> | 767.380820 | 1516.727814 | 758.867545 | 1515.743798 | 758.375537 | <b>Y</b> | <b>438.271096</b>  | 219.639186 | 421.244547  | 211.125912        |             |                   | <b>3</b>  |
| 14 | <b>1661.849326</b> | 831.428301 | 1644.822777 | 822.915027 | 1643.838761 | 822.423019 | <b>K</b> | 275.207767         | 138.107521 | 258.181218  | 129.594247        |             |                   | <b>2</b>  |
| 15 |                    |            |             |            |             |            | <b>K</b> | 147.112804         | 74.060040  | 130.086255  | 65.546765         |             |                   | <b>1</b>  |

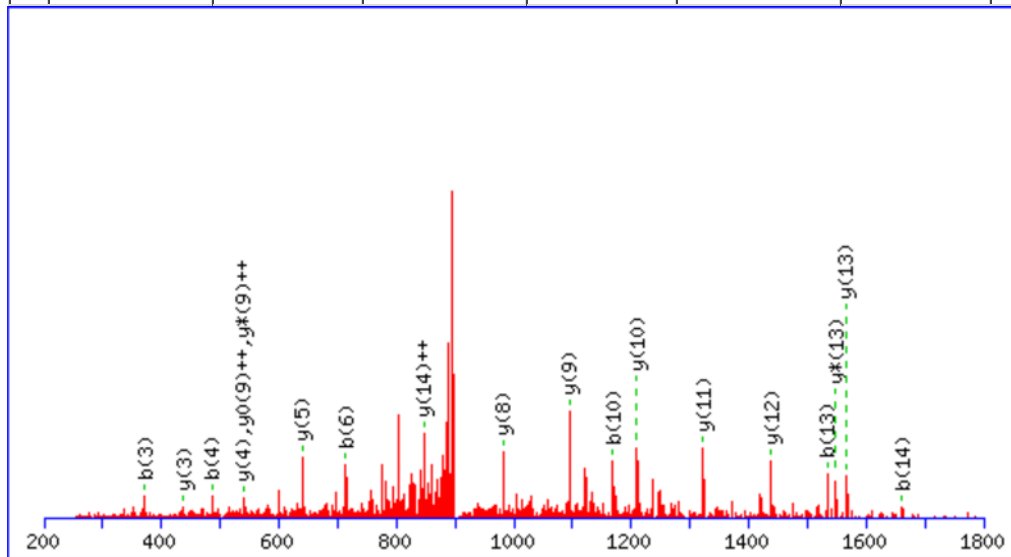

## Peptide View

MS/MS Fragmentation of **KITIADCGQLE**

Found in **IP100419585**, Tax\_Id=9606 Gene\_Symbol=PPIA Peptidyl-prolyl cis-trans isomerase A

Experiment: 18 - NOPA3 Fraction: NOPA3

Match to Query 8181: 1246.622048 from(624.318300,2+)

Title: OECHL100317\_17.11607.11607.2.dta

Data file \\Boromir\masse\Data LTQ-Orbitrap\Chrystelle Lacroix\Etude clinique sJPU\OECHL100317\_17.raw

**Monoisotopic mass of neutral peptide Mr(calc):** 1246.622726**Fixed modifications:** Carbamidomethyl (C) (apply to specified residues or termini only)**Ions Score:** 51**Expect:** 0.00093**Matches :** 16/112 fragment ions using 22 most intense peaks ([help](#))

| #  | b                  | b <sup>++</sup>   | b*          | b <sup>*++</sup> | b <sup>0</sup> | b <sup>0++</sup> | Seq. | y                 | y <sup>++</sup> | y*          | y <sup>*++</sup> | y <sup>0</sup>     | y <sup>0++</sup>  | #  |
|----|--------------------|-------------------|-------------|------------------|----------------|------------------|------|-------------------|-----------------|-------------|------------------|--------------------|-------------------|----|
| 1  | 129.102239         | 65.054757         | 112.075690  | 56.541483        |                |                  | K    |                   |                 |             |                  |                    |                   | 11 |
| 2  | <b>242.186303</b>  | 121.596790        | 225.159754  | 113.083515       |                |                  | I    | 1119.535053       | 560.271165      | 1102.508504 | 551.757890       | <b>1101.524488</b> | <b>551.265882</b> | 10 |
| 3  | <b>343.233982</b>  | 172.120629        | 326.207433  | 163.607355       | 325.223417     | 163.115347       | T    | 1006.450989       | 503.729133      | 989.424440  | 495.215858       | <b>988.440424</b>  | 494.723850        | 9  |
| 4  | <b>456.318046</b>  | 228.662661        | 439.291497  | 220.149387       | 438.307481     | 219.657379       | I    | <b>905.403310</b> | 453.205293      | 888.376761  | 444.692019       | 887.392745         | 444.200011        | 8  |
| 5  | <b>527.355160</b>  | 264.181218        | 510.328611  | 255.667944       | 509.344595     | 255.175936       | A    | <b>792.319246</b> | 396.663261      | 775.292697  | 388.149987       | 774.308681         | 387.657979        | 7  |
| 6  | 642.382103         | 321.694690        | 625.355554  | 313.181415       | 624.371538     | 312.689407       | D    | <b>721.282132</b> | 361.144704      | 704.255583  | 352.631430       | 703.271567         | 352.139422        | 6  |
| 7  | 802.412752         | 401.710014        | 785.386203  | 393.196740       | 784.402187     | 392.704732       | C    | <b>606.255189</b> | 303.631233      | 589.228640  | 295.117958       | 588.244624         | 294.625950        | 5  |
| 8  | 859.434216         | 430.220746        | 842.407667  | 421.707472       | 841.423651     | 421.215464       | G    | <b>446.224540</b> | 223.615908      | 429.197991  | 215.102634       | 428.213975         | 214.610626        | 4  |
| 9  | <b>987.492794</b>  | 494.250035        | 970.466245  | 485.736761       | 969.482229     | 485.244753       | Q    | 389.203076        | 195.105176      | 372.176527  | 186.591902       | 371.192511         | 186.099894        | 3  |
| 10 | <b>1100.576858</b> | <b>550.792067</b> | 1083.550309 | 542.278793       | 1082.566293    | 541.786785       | L    | <b>261.144498</b> | 131.075887      |             |                  | 243.133933         | 122.070605        | 2  |
| 11 |                    |                   |             |                  |                |                  | E    | 148.060434        | 74.533855       |             |                  | 130.049869         | 65.528573         | 1  |

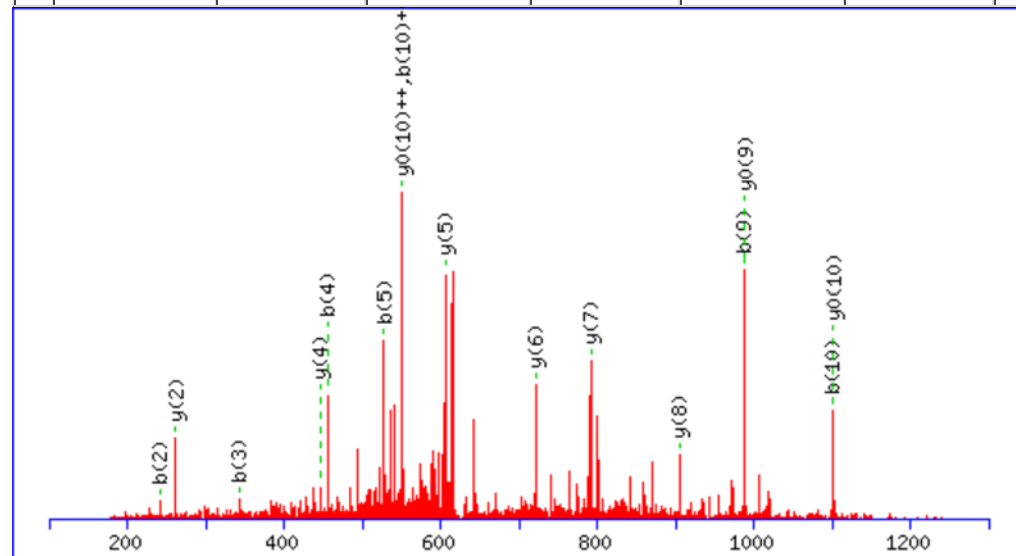

## Peptide View

MS/MS Fragmentation of **LLETECPQYIR**Found in **IPI00007047**, Tax\_Id=9606 Gene\_Symbol=S100A8 Protein S100-A8**Experiment:** 27 - NOPD3 **Fraction:** NOPD3

Match to Query 9235: 1420.702448 from(711.358500,2+)

Title: OECHL100317\_15.12578.12578.2.dta

Data file \\Boromir\masse\Data LTQ-Orbitrap\Chrystelle Lacroix\Etude clinique sJPU\OECHL100317\_15.raw

**Monoisotopic mass of neutral peptide Mr(calc):** 1420.702026**Fixed modifications:** Carbamidomethyl (C) (apply to specified residues or termini only)**Ions Score:** 62**Expect:** 7.6e-005**Matches :** 10/90 fragment ions using 12 most intense peaks ([help](#))

| #  | b                  | b <sup>++</sup> | b*          | b <sup>*++</sup> | b <sup>0</sup> | b <sup>0++</sup> | Seq. | y                  | y <sup>++</sup>   | y*          | y <sup>*++</sup> | y <sup>0</sup> | y <sup>0++</sup> | #  |
|----|--------------------|-----------------|-------------|------------------|----------------|------------------|------|--------------------|-------------------|-------------|------------------|----------------|------------------|----|
| 1  | 114.091340         | 57.549308       |             |                  |                |                  | L    |                    |                   |             |                  |                |                  | 11 |
| 2  | 227.175404         | 114.091340      |             |                  |                |                  | L    | 1308.625265        | 654.816271        | 1291.598716 | 646.302996       | 1290.614700    | 645.810988       | 10 |
| 3  | <b>356.217997</b>  | 178.612637      |             |                  | 338.207432     | 169.607354       | E    | <b>1195.541201</b> | <b>598.274239</b> | 1178.514652 | 589.760964       | 1177.530636    | 589.268956       | 9  |
| 4  | 457.265676         | 229.136476      |             |                  | 439.255111     | 220.131194       | T    | <b>1066.498608</b> | 533.752942        | 1049.472059 | 525.239668       | 1048.488043    | 524.747660       | 8  |
| 5  | 586.308269         | 293.657773      |             |                  | 568.297704     | 284.652490       | E    | <b>965.450929</b>  | 483.229103        | 948.424380  | 474.715828       | 947.440364     | 474.223820       | 7  |
| 6  | 746.338918         | 373.673097      |             |                  | 728.328353     | 364.667815       | C    | <b>836.408336</b>  | 418.707806        | 819.381787  | 410.194531       |                |                  | 6  |
| 7  | 843.391682         | 422.199479      |             |                  | 825.381117     | 413.194197       | P    | <b>676.377687</b>  | 338.692481        | 659.351138  | 330.179207       |                |                  | 5  |
| 8  | 971.450260         | 486.228768      | 954.423711  | 477.715494       | 953.439695     | 477.223486       | Q    | 579.324923         | 290.166099        | 562.298374  | 281.652825       |                |                  | 4  |
| 9  | 1134.513589        | 567.760433      | 1117.487040 | 559.247158       | 1116.503024    | 558.755150       | Y    | <b>451.266345</b>  | 226.136810        | 434.239796  | 217.623536       |                |                  | 3  |
| 10 | <b>1247.597653</b> | 624.302465      | 1230.571104 | 615.789190       | 1229.587088    | 615.297182       | I    | <b>288.203016</b>  | 144.605146        | 271.176467  | 136.091871       |                |                  | 2  |
| 11 |                    |                 |             |                  |                |                  | R    | 175.118952         | 88.063114         | 158.092403  | 79.549839        |                |                  | 1  |

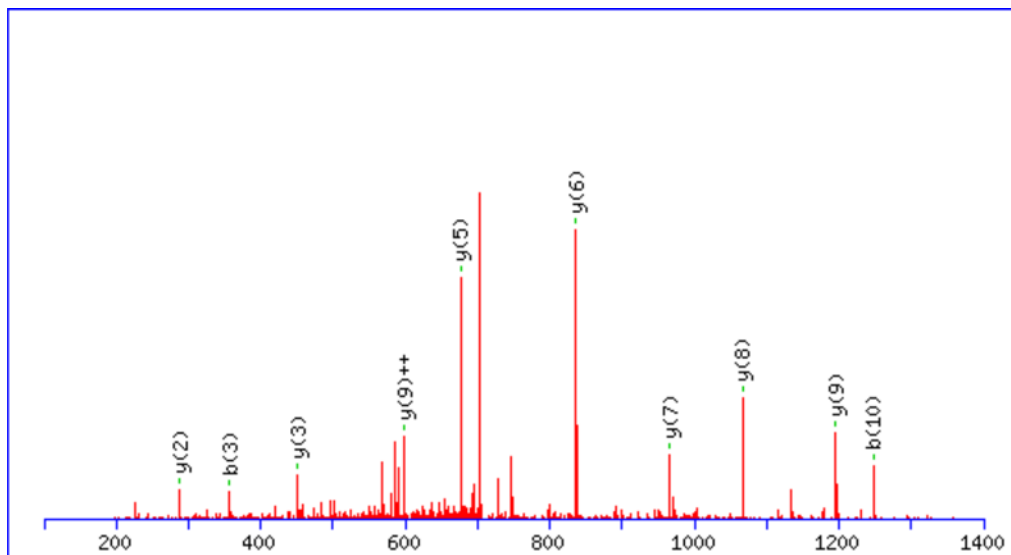

## Peptide View

MS/MS Fragmentation of **NPVLQQDAHSSVTITPQR**

Found in **IPI00410488**, Tax\_Id=9606 Gene\_Symbol=CD276 Isoform 1 of CD276 antigen

**Experiment:** 27 - NOPD3 **Fraction:** NOPD3

Match to Query 14039: 1990.025648 from(996.020100,2+)

Title: OECHL100317\_15.10128.10128.2.dta

Data file \\Boromir\masse\Data LTQ-Orbitrap\Chrystelle Lacroix\Etude clinique sJPU\OECHL100317\_15.raw

**Monoisotopic mass of neutral peptide Mr(calc):** 1990.023209 **Fixed modifications:** Carbamidomethyl (C) (apply to specified residues or termini only) **Ions Score:** 72

**Expect:** 9.6e-006 **Matches :** 65/186 fragment ions using 125 most intense peaks ([help](#))

| # | b                 | b <sup>++</sup> | b*                | b* <sup>++</sup> | b <sup>0</sup> | b <sup>0++</sup> | Seq. | y                  | y <sup>++</sup>   | y*                 | y* <sup>++</sup>  | y <sup>0</sup> | y <sup>0++</sup>  | #  |
|---|-------------------|-----------------|-------------------|------------------|----------------|------------------|------|--------------------|-------------------|--------------------|-------------------|----------------|-------------------|----|
| 1 | 115.050203        | 58.028740       | 98.023654         | 49.515465        |                |                  | N    |                    |                   |                    |                   |                |                   | 18 |
| 2 | 212.102967        | 106.555121      | 195.076418        | 98.041847        |                |                  | P    | 1876.987553        | 938.997415        | 1859.961004        | 930.484140        | 1858.976988    | 929.992132        | 17 |
| 3 | <b>311.171381</b> | 156.089328      | <b>294.144832</b> | 147.576054       |                |                  | V    | 1779.934789        | <b>890.471033</b> | <b>1762.908240</b> | 881.957758        | 1761.924224    | 881.465750        | 16 |
| 4 | <b>424.255445</b> | 212.631361      | <b>407.228896</b> | 204.118086       |                |                  | L    | <b>1680.866375</b> | 840.936826        | <b>1663.839826</b> | <b>832.423551</b> | 1662.855810    | <b>831.931543</b> | 15 |
| 5 | <b>552.314023</b> | 276.660650      | <b>535.287474</b> | 268.147375       |                |                  | Q    | <b>1567.782311</b> | 784.394794        | <b>1550.755762</b> | <b>775.881519</b> | 1549.771746    | <b>775.389511</b> | 14 |
| 6 | <b>680.372601</b> | 340.689939      | <b>663.346052</b> | 332.176664       |                |                  | Q    | <b>1439.723733</b> | 720.365505        | <b>1422.697184</b> | 711.852230        | 1421.713168    | 711.360222        | 13 |

|    |                    |                   |                    |                   |                    |                   |          |                    |                   |                   |                   |             |                   |           |
|----|--------------------|-------------------|--------------------|-------------------|--------------------|-------------------|----------|--------------------|-------------------|-------------------|-------------------|-------------|-------------------|-----------|
| 7  | <b>795.399544</b>  | 398.203410        | 778.372995         | 389.690136        | <b>777.388979</b>  | 389.198128        | <b>D</b> | <b>1311.665155</b> | 656.336215        | 1294.638606       | 647.822941        | 1293.654590 | 647.330933        | <b>12</b> |
| 8  | <b>866.436658</b>  | 433.721967        | 849.410109         | 425.208693        | 848.426093         | <b>424.716685</b> | <b>A</b> | <b>1196.638212</b> | 598.822744        | 1179.611663       | <b>590.309470</b> | 1178.627647 | <b>589.817462</b> | <b>11</b> |
| 9  | <b>1003.495570</b> | <b>502.251423</b> | 986.469021         | 493.738149        | 985.485005         | 493.246141        | <b>H</b> | <b>1125.601098</b> | 563.304187        | 1108.574549       | 554.790913        | 1107.590533 | 554.298905        | <b>10</b> |
| 10 | <b>1090.527598</b> | 545.767437        | 1073.501049        | 537.254163        | <b>1072.517033</b> | 536.762155        | <b>S</b> | <b>988.542186</b>  | 494.774731        | 971.515637        | 486.261457        | 970.531621  | 485.769449        | <b>9</b>  |
| 11 | <b>1177.559626</b> | 589.283451        | <b>1160.533077</b> | 580.770177        | <b>1159.549061</b> | 580.278169        | <b>S</b> | <b>901.510158</b>  | 451.258717        | 884.483609        | 442.745443        | 883.499593  | 442.253435        | <b>8</b>  |
| 12 | <b>1276.628040</b> | 638.817658        | <b>1259.601491</b> | 630.304384        | <b>1258.617475</b> | 629.812376        | <b>V</b> | <b>814.478130</b>  | <b>407.742703</b> | 797.451581        | 399.229428        | 796.467565  | 398.737420        | <b>7</b>  |
| 13 | <b>1377.675719</b> | 689.341498        | <b>1360.649170</b> | <b>680.828223</b> | <b>1359.665154</b> | <b>680.336215</b> | <b>T</b> | <b>715.409716</b>  | 358.208496        | 698.383167        | 349.695221        | 697.399151  | 349.203213        | <b>6</b>  |
| 14 | <b>1490.759783</b> | 745.883530        | <b>1473.733234</b> | 737.370255        | <b>1472.749218</b> | 736.878247        | <b>I</b> | <b>614.362037</b>  | 307.684656        | 597.335488        | 299.171382        | 596.351472  | 298.679374        | <b>5</b>  |
| 15 | <b>1591.807462</b> | 796.407369        | <b>1574.780913</b> | 787.894095        | <b>1573.796897</b> | 787.402087        | <b>T</b> | <b>501.277973</b>  | 251.142624        | <b>484.251424</b> | 242.629350        | 483.267408  | 242.137342        | <b>4</b>  |
| 16 | 1688.860226        | 844.933751        | 1671.833677        | 836.420477        | 1670.849661        | 835.928469        | <b>P</b> | <b>400.230294</b>  | 200.618785        | <b>383.203745</b> | 192.105510        |             |                   | <b>3</b>  |
| 17 | <b>1816.918804</b> | 908.963040        | 1799.892255        | 900.449766        | 1798.908239        | 899.957758        | <b>Q</b> | 303.177530         | 152.092403        | 286.150981        | 143.579128        |             |                   | <b>2</b>  |
| 18 |                    |                   |                    |                   |                    |                   | <b>R</b> | 175.118952         | 88.063114         | 158.092403        | 79.549839         |             |                   | <b>1</b>  |

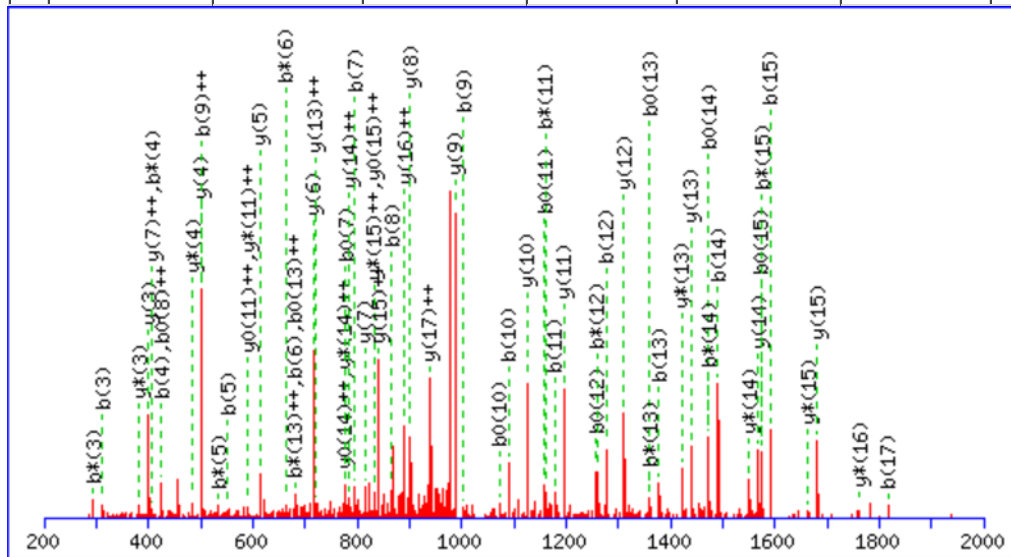

## Peptide View

MS/MS Fragmentation of **TVAGPVGGSLSVQCPYEKEHR**

Found in **IP100414784**, Tax\_Id=9606 Gene\_Symbol=CD300A Isoform 1 of CMRF35-like molecule 8

Experiment: 27 - NOPD3 Fraction: NOPD3

Match to Query 15214: 2270.113448 from(1136.064000,2+)

Title: OECHL100317\_15.10837.10837.2.dta

Data file \\Boromir\masse\Data LTQ-Orbitrap\Chrystelle Lacroix\Etude clinique sJPU\OECHL100317\_15.raw

**Monoisotopic mass of neutral peptide Mr(calc):** 2270.111374**Fixed modifications:** Carbamidomethyl (C) (apply to specified residues or termini only)**Ions Score:** 77**Expect:** 3.9e-006**Matches :** 31/212 fragment ions using 51 most intense peaks ([help](#))

| #  | b           | b <sup>++</sup> | b*          | b <sup>*++</sup> | b <sup>0</sup> | b <sup>0++</sup> | Seq. | y           | y <sup>++</sup> | y*          | y <sup>*++</sup> | y <sup>0</sup> | y <sup>0++</sup> |
|----|-------------|-----------------|-------------|------------------|----------------|------------------|------|-------------|-----------------|-------------|------------------|----------------|------------------|
| 1  | 102.054955  | 51.531116       |             |                  | 84.044390      | 42.525833        | T    |             |                 |             |                  |                |                  |
| 2  | 201.123369  | 101.065322      |             |                  | 183.112804     | 92.060040        | V    | 2170.070965 | 1085.539120     | 2153.044416 | 1077.025846      | 2152.060400    | 1076.5338        |
| 3  | 272.160483  | 136.583879      |             |                  | 254.149918     | 127.578597       | A    | 2071.002551 | 1036.004913     | 2053.976002 | 1027.491639      | 2052.991986    | 1026.9996        |
| 4  | 329.181947  | 165.094611      |             |                  | 311.171382     | 156.089329       | G    | 1999.965437 | 1000.486357     | 1982.938888 | 991.973082       | 1981.954872    | 991.4810         |
| 5  | 426.234711  | 213.620994      |             |                  | 408.224146     | 204.615711       | P    | 1942.943973 | 971.975625      | 1925.917424 | 963.462350       | 1924.933408    | 962.9703         |
| 6  | 525.303125  | 263.155201      |             |                  | 507.292560     | 254.149918       | V    | 1845.891209 | 923.449243      | 1828.864660 | 914.935968       | 1827.880644    | 914.4439         |
| 7  | 582.324589  | 291.665933      |             |                  | 564.314024     | 282.660650       | G    | 1746.822795 | 873.915036      | 1729.796246 | 865.401761       | 1728.812230    | 864.9097         |
| 8  | 639.346053  | 320.176665      |             |                  | 621.335488     | 311.171382       | G    | 1689.801331 | 845.404304      | 1672.774782 | 836.891029       | 1671.790766    | 836.3990         |
| 9  | 726.378081  | 363.692679      |             |                  | 708.367516     | 354.687396       | S    | 1632.779867 | 816.893572      | 1615.753318 | 808.380297       | 1614.769302    | 807.8882         |
| 10 | 839.462145  | 420.234711      |             |                  | 821.451580     | 411.229428       | L    | 1545.747839 | 773.377558      | 1528.721290 | 764.864283       | 1527.737274    | 764.3722         |
| 11 | 926.494173  | 463.750725      |             |                  | 908.483608     | 454.745442       | S    | 1432.663775 | 716.835526      | 1415.637226 | 708.322251       | 1414.653210    | 707.8302         |
| 12 | 1025.562587 | 513.284932      |             |                  | 1007.552022    | 504.279649       | V    | 1345.631747 | 673.319512      | 1328.605198 | 664.806237       | 1327.621182    | 664.3142         |
| 13 | 1153.621165 | 577.314221      | 1136.594616 | 568.800946       | 1135.610600    | 568.308938       | Q    | 1246.563333 | 623.785305      | 1229.536784 | 615.272030       | 1228.552768    | 614.7800         |
| 14 | 1313.651814 | 657.329545      | 1296.625265 | 648.816271       | 1295.641249    | 648.324263       | C    | 1118.504755 | 559.756016      | 1101.478206 | 551.242741       | 1100.494190    | 550.7507         |
| 15 | 1410.704578 | 705.855927      | 1393.678029 | 697.342653       | 1392.694013    | 696.850645       | P    | 958.474106  | 479.740691      | 941.447557  | 471.227417       | 940.463541     | 470.7354         |
| 16 | 1573.767907 | 787.387592      | 1556.741358 | 778.874317       | 1555.757342    | 778.382309       | Y    | 861.421342  | 431.214309      | 844.394793  | 422.701035       | 843.410777     | 422.2090         |
| 17 | 1702.810500 | 851.908888      | 1685.783951 | 843.395614       | 1684.799935    | 842.903606       | E    | 698.358013  | 349.682645      | 681.331464  | 341.169370       | 680.347448     | 340.6773         |
| 18 | 1830.905463 | 915.956370      | 1813.878914 | 907.443095       | 1812.894898    | 906.951087       | K    | 569.315420  | 285.161348      | 552.288871  | 276.648074       | 551.304855     | 276.1560         |
| 19 | 1959.948056 | 980.477666      | 1942.921507 | 971.964392       | 1941.937491    | 971.472384       | E    | 441.220457  | 221.113867      | 424.193908  | 212.600592       | 423.209892     | 212.1085         |
| 20 | 2097.006968 | 1049.007122     | 2079.980419 | 1040.493847      | 2078.996403    | 1040.001840      | H    | 312.177864  | 156.592570      | 295.151315  | 148.079295       |                |                  |
| 21 |             |                 |             |                  |                |                  | R    | 175.118952  | 88.063114       | 158.092403  | 79.549839        |                |                  |

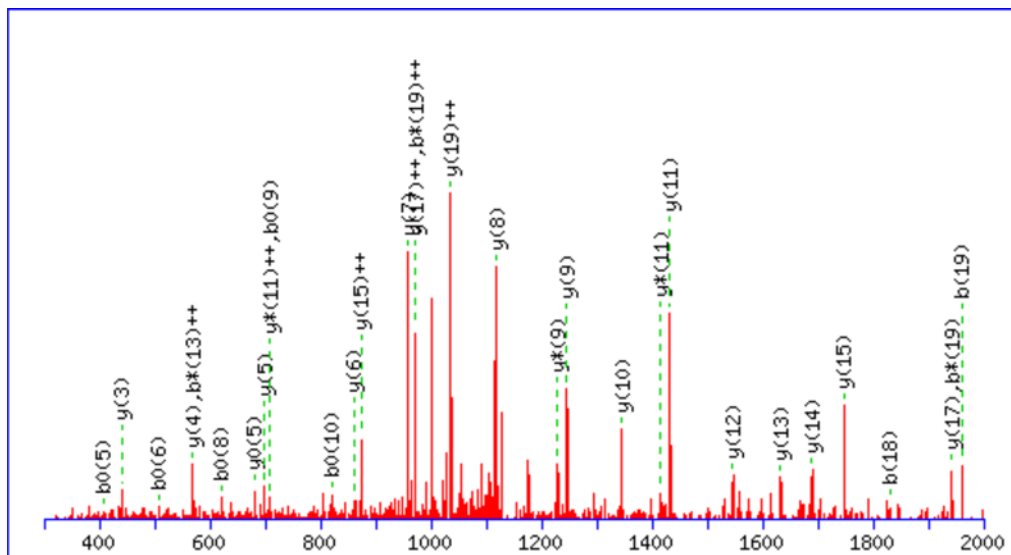

## Peptide View

MS/MS Fragmentation of **ASLQHGQAAEKGPHR**

Found in **IPI00165044**, Tax\_Id=9606 Gene\_Symbol=FAM198B Isoform 2 of Protein ENED

**Experiment:** 27 - NOPD3 **Fraction:** NOPD3

Match to Query 10994: 1585.807272 from(529.609700,3+)

Title: OECHL100317\_15.1843.1843.3.dta

Data file \\Boromir\masse\Data LTQ-Orbitrap\Chrystelle Lacroix\Etude clinique sJPU\OECHL100317\_15.raw

**Monoisotopic mass of neutral peptide Mr(calc):** 1585.807312 **Fixed modifications:** Carbamidomethyl (C) (apply to specified residues or termini only) **Ions Score:** 57

**Expect:** 0.00032 **Matches :** 31/150 fragment ions using 33 most intense peaks ([help](#))

| # | b          | b <sup>++</sup> | b*         | b <sup>*++</sup> | b <sup>0</sup> | b <sup>0++</sup> | Seq. | y           | y <sup>++</sup> | y*          | y <sup>*++</sup> | y <sup>0</sup> | y <sup>0++</sup> | #  |
|---|------------|-----------------|------------|------------------|----------------|------------------|------|-------------|-----------------|-------------|------------------|----------------|------------------|----|
| 1 | 72.044390  | 36.525833       |            |                  |                |                  | A    |             |                 |             |                  |                |                  | 15 |
| 2 | 159.076418 | 80.041847       |            |                  | 141.065853     | 71.036564        | S    | 1515.777500 | 758.392388      | 1498.750951 | 749.879114       | 1497.766935    | 749.387106       | 14 |
| 3 | 272.160482 | 136.583879      |            |                  | 254.149917     | 127.578597       | L    | 1428.745472 | 714.876374      | 1411.718923 | 706.363100       | 1410.734907    | 705.871092       | 13 |
| 4 | 400.219060 | 200.613168      | 383.192511 | 192.099894       | 382.208495     | 191.607886       | Q    | 1315.661408 | 658.334342      | 1298.634859 | 649.821068       | 1297.650843    | 649.329060       | 12 |
| 5 | 537.277972 | 269.142624      | 520.251423 | 260.629350       | 519.267407     | 260.137342       | H    | 1187.602830 | 594.305053      | 1170.576281 | 585.791779       | 1169.592265    | 585.299771       | 11 |
| 6 | 594.299436 | 297.653356      | 577.272887 | 289.140082       | 576.288871     | 288.648074       | G    | 1050.543918 | 525.775597      | 1033.517369 | 517.262323       | 1032.533353    | 516.770315       | 10 |

|    |             |            |             |            |             |            |   |            |            |            |            |            |            |   |
|----|-------------|------------|-------------|------------|-------------|------------|---|------------|------------|------------|------------|------------|------------|---|
| 7  | 722.358014  | 361.682645 | 705.331465  | 353.169371 | 704.347449  | 352.677363 | Q | 993.522454 | 497.264865 | 976.495905 | 488.751591 | 975.511889 | 488.259583 | 9 |
| 8  | 793.395128  | 397.201202 | 776.368579  | 388.687928 | 775.384563  | 388.195920 | A | 865.463876 | 433.235576 | 848.437327 | 424.722302 | 847.453311 | 424.230294 | 8 |
| 9  | 864.432242  | 432.719759 | 847.405693  | 424.206485 | 846.421677  | 423.714477 | A | 794.426762 | 397.717019 | 777.400213 | 389.203745 | 776.416197 | 388.711737 | 7 |
| 10 | 993.474835  | 497.241056 | 976.448286  | 488.727781 | 975.464270  | 488.235773 | E | 723.389648 | 362.198462 | 706.363099 | 353.685188 | 705.379083 | 353.193180 | 6 |
| 11 | 1121.569798 | 561.288537 | 1104.543249 | 552.775263 | 1103.559233 | 552.283255 | K | 594.347055 | 297.677166 | 577.320506 | 289.163891 |            |            | 5 |
| 12 | 1178.591262 | 589.799269 | 1161.564713 | 581.285995 | 1160.580697 | 580.793987 | G | 466.252092 | 233.629684 | 449.225543 | 225.116409 |            |            | 4 |
| 13 | 1275.644026 | 638.325651 | 1258.617477 | 629.812377 | 1257.633461 | 629.320369 | P | 409.230628 | 205.118952 | 392.204079 | 196.605677 |            |            | 3 |
| 14 | 1412.702938 | 706.855107 | 1395.676389 | 698.341833 | 1394.692373 | 697.849825 | H | 312.177864 | 156.592570 | 295.151315 | 148.079295 |            |            | 2 |
| 15 |             |            |             |            |             |            | R | 175.118952 | 88.063114  | 158.092403 | 79.549839  |            |            | 1 |

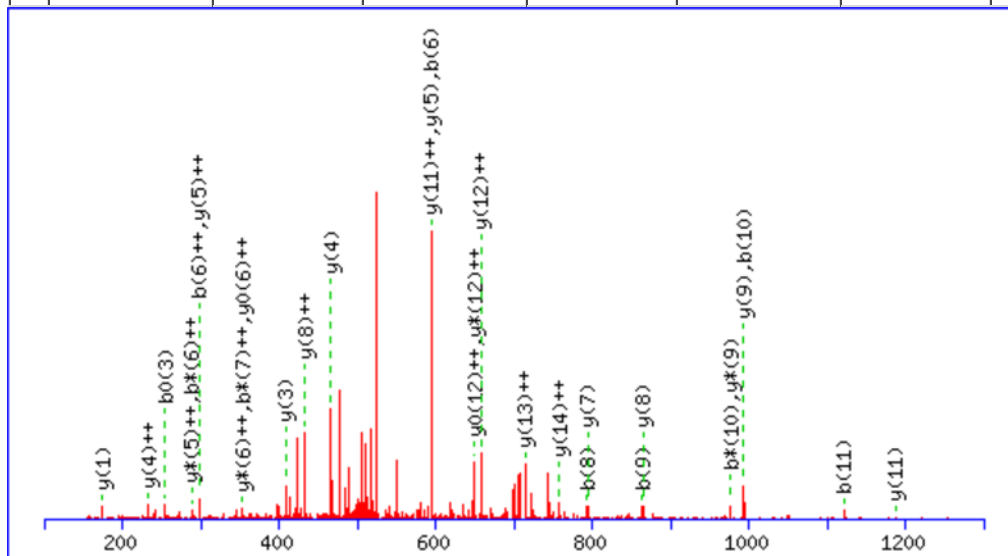

## Peptide View

MS/MS Fragmentation of **LLIYDASNLETGVPSR**

Found in **IP100003111**, Tax\_Id=9606 Gene\_Symbol=LOC652694 Ig kappa chain V-I region AU

**Experiment:** 27 - NOPD3 **Fraction:** NOPD3

Match to Query 12494: 1746.915648 from(874.465100,2+)

Title: OECHL100317\_15.17015.17015.2.dta

Data file \\Boromir\masse\Data LTQ-Orbitrap\Chrystelle Lacroix\Etude clinique sJPU\OECHL100317\_15.raw



**Monoisotopic mass of neutral peptide Mr(calc):** 1746.915192**Fixed modifications:** Carbamidomethyl (C) (apply to specified residues or termini only)**Ions Score:** 82  
**Expect:** 7.2e-007**Matches :** 22/156 fragment ions using 29 most intense peaks ([help](#))

| #  | b                  | b <sup>++</sup>   | b*          | b <sup>*++</sup> | b <sup>0</sup>     | b <sup>0++</sup> | Seq. | y                  | y <sup>++</sup> | y*                | y <sup>*++</sup> | y <sup>0</sup>     | y <sup>0++</sup> | #  |
|----|--------------------|-------------------|-------------|------------------|--------------------|------------------|------|--------------------|-----------------|-------------------|------------------|--------------------|------------------|----|
| 1  | 114.091340         | 57.549308         |             |                  |                    |                  | L    |                    |                 |                   |                  |                    |                  | 16 |
| 2  | 227.175404         | 114.091340        |             |                  |                    |                  | L    | 1634.838427        | 817.922852      | 1617.811878       | 809.409577       | 1616.827862        | 808.917569       | 15 |
| 3  | 340.259468         | 170.633372        |             |                  |                    |                  | I    | <b>1521.754363</b> | 761.380820      | 1504.727814       | 752.867545       | 1503.743798        | 752.375537       | 14 |
| 4  | 503.322797         | 252.165036        |             |                  |                    |                  | Y    | 1408.670299        | 704.838788      | 1391.643750       | 696.325513       | <b>1390.659734</b> | 695.833505       | 13 |
| 5  | 618.349740         | 309.678508        |             |                  | 600.339175         | 300.673226       | D    | <b>1245.606970</b> | 623.307123      | 1228.580421       | 614.793849       | 1227.596405        | 614.301841       | 12 |
| 6  | 689.386854         | 345.197065        |             |                  | 671.376289         | 336.191782       | A    | <b>1130.580027</b> | 565.793652      | 1113.553478       | 557.280377       | 1112.569462        | 556.788369       | 11 |
| 7  | <b>776.418882</b>  | 388.713079        |             |                  | 758.408317         | 379.707796       | S    | 1059.542913        | 530.275095      | 1042.516364       | 521.761820       | 1041.532348        | 521.269812       | 10 |
| 8  | 890.461809         | 445.734542        | 873.435260  | 437.221268       | 872.451244         | 436.729260       | N    | <b>972.510885</b>  | 486.759081      | 955.484336        | 478.245806       | 954.500320         | 477.753798       | 9  |
| 9  | <b>1003.545873</b> | 502.276574        | 986.519324  | 493.763300       | 985.535308         | 493.271292       | L    | <b>858.467958</b>  | 429.737617      | 841.441409        | 421.224343       | 840.457393         | 420.732335       | 8  |
| 10 | <b>1132.588466</b> | 566.797871        | 1115.561917 | 558.284597       | 1114.577901        | 557.792588       | E    | <b>745.383894</b>  | 373.195585      | 728.357345        | 364.682311       | 727.373329         | 364.190303       | 7  |
| 11 | <b>1233.636145</b> | <b>617.321710</b> | 1216.609596 | 608.808436       | 1215.625580        | 608.316428       | T    | <b>616.341301</b>  | 308.674289      | 599.314752        | 300.161014       | 598.330736         | 299.669006       | 6  |
| 12 | <b>1290.657609</b> | 645.832442        | 1273.631060 | 637.319168       | <b>1272.647044</b> | 636.827160       | G    | <b>515.293622</b>  | 258.150449      | 498.267073        | 249.637175       | 497.283057         | 249.145167       | 5  |
| 13 | <b>1389.726023</b> | 695.366649        | 1372.699474 | 686.853375       | 1371.715458        | 686.361367       | V    | <b>458.272158</b>  | 229.639717      | 441.245609        | 221.126443       | 440.261593         | 220.634435       | 4  |
| 14 | 1486.778787        | 743.893032        | 1469.752238 | 735.379757       | 1468.768222        | 734.887749       | P    | <b>359.203744</b>  | 180.105510      | <b>342.177195</b> | 171.592236       | <b>341.193179</b>  | 171.100228       | 3  |
| 15 | <b>1573.810815</b> | 787.409046        | 1556.784266 | 778.895771       | 1555.800250        | 778.403763       | S    | 262.150980         | 131.579128      | 245.124431        | 123.065854       | 244.140415         | 122.573846       | 2  |
| 16 |                    |                   |             |                  |                    |                  | R    | 175.118952         | 88.063114       | 158.092403        | 79.549839        |                    |                  | 1  |

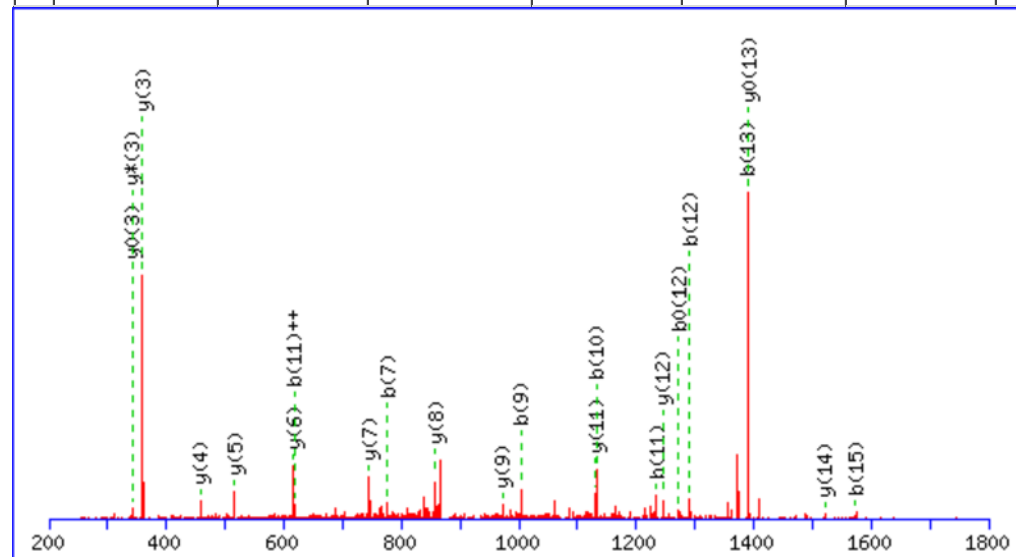

## Peptide View

MS/MS Fragmentation of **IQEVAGSLIFR**Found in **IP100006988**, Tax\_Id=9606 Gene\_Symbol=RETN Resistin**Experiment:** 27 - NOPD3 **Fraction:** NOPD3

Match to Query 6983: 1231.692448 from(616.853500,2+)

Title: OECHL100317\_15.16886.16886.2.dta

Data file \\Boromir\masse\Data LTQ-Orbitrap\Chrystelle Lacroix\Etude clinique sJPU\OECHL100317\_15.raw

**Monoisotopic mass of neutral peptide Mr(calc):** 1231.692459**Fixed modifications:** Carbamidomethyl (C) (apply to specified residues or termini only)**Ions Score:** 59**Expect:** 5.4e-005**Matches :** 19/106 fragment ions using 30 most intense peaks ([help](#))

| #  | b                  | b <sup>++</sup> | b*                | b <sup>*++</sup> | b <sup>0</sup> | b <sup>0++</sup> | Seq. | y                 | y <sup>++</sup>   | y*                 | y <sup>*++</sup>  | y <sup>0</sup>    | y <sup>0++</sup> | #  |
|----|--------------------|-----------------|-------------------|------------------|----------------|------------------|------|-------------------|-------------------|--------------------|-------------------|-------------------|------------------|----|
| 1  | 114.091340         | 57.549308       |                   |                  |                |                  | I    |                   |                   |                    |                   |                   |                  | 11 |
| 2  | <b>242.149918</b>  | 121.578597      | <b>225.123369</b> | 113.065323       |                |                  | Q    | 1119.615685       | <b>560.311481</b> | <b>1102.589136</b> | 551.798206        | 1101.605120       | 551.306198       | 10 |
| 3  | <b>371.192511</b>  | 186.099894      | 354.165962        | 177.586619       | 353.181946     | 177.094611       | E    | <b>991.557107</b> | 496.282192        | 974.530558         | 487.768917        | <b>973.546542</b> | 487.276909       | 9  |
| 4  | <b>470.260925</b>  | 235.634101      | 453.234376        | 227.120826       | 452.250360     | 226.628818       | V    | <b>862.514514</b> | 431.760895        | 845.487965         | 423.247621        | 844.503949        | 422.755613       | 8  |
| 5  | <b>541.298039</b>  | 271.152658      | 524.271490        | 262.639383       | 523.287474     | 262.147375       | A    | <b>763.446100</b> | 382.226688        | 746.419551         | 373.713414        | 745.435535        | 373.221406       | 7  |
| 6  | <b>598.319503</b>  | 299.663390      | 581.292954        | 291.150115       | 580.308938     | 290.658107       | G    | <b>692.408986</b> | 346.708131        | 675.382437         | 338.194857        | 674.398421        | 337.702849       | 6  |
| 7  | 685.351531         | 343.179404      | 668.324982        | 334.666129       | 667.340966     | 334.174121       | S    | 635.387522        | 318.197399        | 618.360973         | 309.684125        | 617.376957        | 309.192117       | 5  |
| 8  | <b>798.435595</b>  | 399.721436      | 781.409046        | 391.208161       | 780.425030     | 390.716153       | L    | 548.355494        | 274.681385        | 531.328945         | <b>266.168111</b> |                   |                  | 4  |
| 9  | <b>911.519659</b>  | 456.263468      | 894.493110        | 447.750193       | 893.509094     | 447.258185       | I    | <b>435.271430</b> | 218.139353        | 418.244881         | 209.626078        |                   |                  | 3  |
| 10 | <b>1058.588073</b> | 529.797675      | 1041.561524       | 521.284400       | 1040.577508    | 520.792392       | F    | <b>322.187366</b> | 161.597321        | 305.160817         | 153.084046        |                   |                  | 2  |
| 11 |                    |                 |                   |                  |                |                  | R    | 175.118952        | 88.063114         | 158.092403         | 79.549839         |                   |                  | 1  |

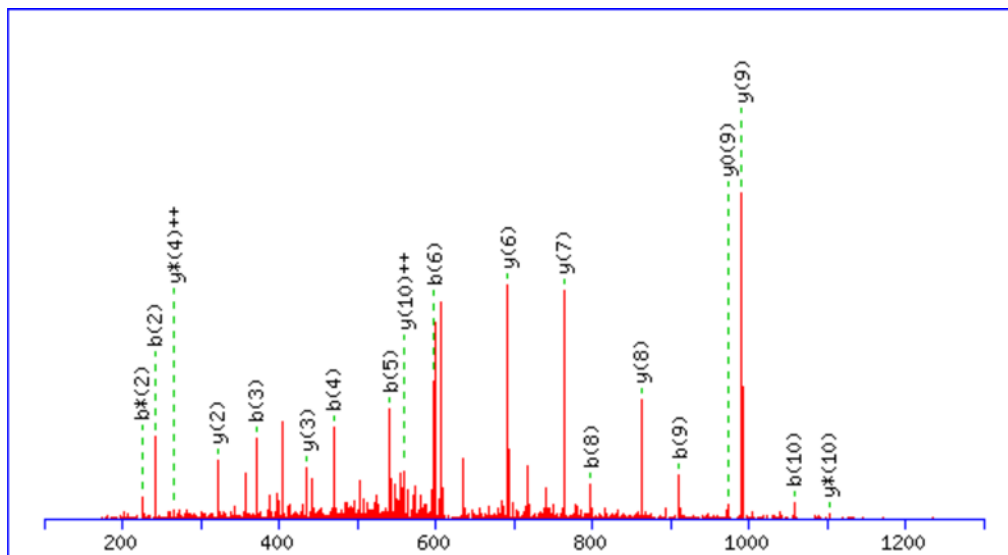

## Peptide View

MS/MS Fragmentation of **ASVGQDSPEPR**

Found in **IPI00044369**, Tax\_Id=9606 Gene\_Symbol=PLXDC2 Isoform 1 of Plexin domain-containing protein 2

**Experiment:** 27 - NOPD3 **Fraction:** NOPD3

Match to Query 5394: 1141.536248 from(571.775400,2+)

Title: OECHL100317\_15.3274.3274.2.dta

Data file \\Boromir\masse\Data LTQ-Orbitrap\Chrystelle Lacroix\Etude clinique sJPU\OECHL100317\_15.raw

**Monoisotopic mass of neutral peptide Mr(calc):** 1141.536362 **Fixed modifications:** Carbamidomethyl (C) (apply to specified residues or termini only) **Ions Score:** 58

**Expect:** 0.0001 **Matches :** 39/106 fragment ions using 90 most intense peaks ([help](#))

| # | b                 | b <sup>++</sup> | b*                | b <sup>*++</sup> | b <sup>0</sup>    | b <sup>0++</sup> | Seq. | y                  | y <sup>++</sup>   | y*                | y <sup>*++</sup>  | y <sup>0</sup>    | y <sup>0++</sup> | #  |
|---|-------------------|-----------------|-------------------|------------------|-------------------|------------------|------|--------------------|-------------------|-------------------|-------------------|-------------------|------------------|----|
| 1 | 72.044390         | 36.525833       |                   |                  |                   |                  | A    |                    |                   |                   |                   |                   |                  | 11 |
| 2 | 159.076418        | 80.041847       |                   |                  | 141.065853        | 71.036564        | S    | <b>1071.506528</b> | <b>536.256902</b> | 1054.479979       | 527.743628        | 1053.495963       | 527.251620       | 10 |
| 3 | <b>258.144832</b> | 129.576054      |                   |                  | <b>240.134267</b> | 120.570772       | V    | <b>984.474500</b>  | <b>492.740888</b> | <b>967.447951</b> | 484.227614        | <b>966.463935</b> | 483.735606       | 9  |
| 4 | <b>315.166296</b> | 158.086786      |                   |                  | <b>297.155731</b> | 149.081504       | G    | <b>885.406086</b>  | <b>443.206681</b> | <b>868.379537</b> | <b>434.693407</b> | <b>867.395521</b> | 434.201399       | 8  |
| 5 | <b>443.224874</b> | 222.116075      | <b>426.198325</b> | 213.602801       | <b>425.214309</b> | 213.110793       | Q    | <b>828.384622</b>  | <b>414.695949</b> | 811.358073        | 406.182675        | 810.374057        | 405.690667       | 7  |
| 6 | <b>558.251817</b> | 279.629547      | 541.225268        | 271.116272       | 540.241252        | 270.624264       | D    | <b>700.326044</b>  | 350.666660        | 683.299495        | 342.153386        | <b>682.315479</b> | 341.661378       | 6  |

|    |            |            |            |            |            |            |   |            |            |            |            |            |            |   |
|----|------------|------------|------------|------------|------------|------------|---|------------|------------|------------|------------|------------|------------|---|
| 7  | 645.283845 | 323.145561 | 628.257296 | 314.632286 | 627.273280 | 314.140278 | S | 585.299101 | 293.153189 | 568.272552 | 284.639914 | 567.288536 | 284.147906 | 5 |
| 8  | 742.336609 | 371.671943 | 725.310060 | 363.158668 | 724.326044 | 362.666660 | P | 498.267073 | 249.637174 | 481.240524 | 241.123900 | 480.256508 | 240.631892 | 4 |
| 9  | 871.379202 | 436.193239 | 854.352653 | 427.679965 | 853.368637 | 427.187957 | E | 401.214309 | 201.110792 | 384.187760 | 192.597518 | 383.203744 | 192.105510 | 3 |
| 10 | 968.431966 | 484.719621 | 951.405417 | 476.206347 | 950.421401 | 475.714339 | P | 272.171716 | 136.589496 | 255.145167 | 128.076221 |            |            | 2 |
| 11 |            |            |            |            |            |            | R | 175.118952 | 88.063114  | 158.092403 | 79.549839  |            |            | 1 |

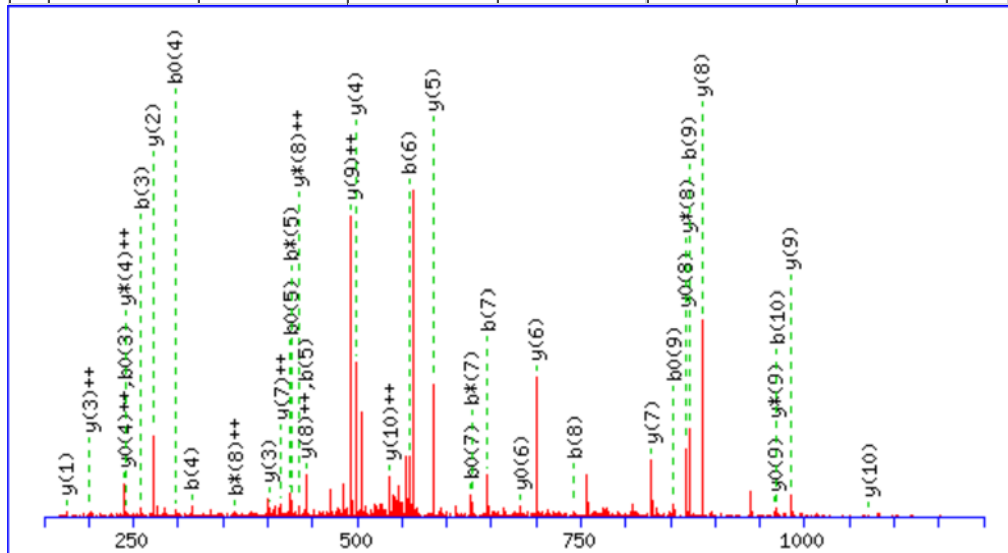

## Peptide View

MS/MS Fragmentation of **NAADSSVPSAPR**

Found in **IP100909783**, Tax\_Id=9606 Gene\_Symbol=SPINT2 serine protease inhibitor, Kunitz type, 2 isoform b precursor

**Experiment:** 27 - NOPD3 **Fraction:** NOPD3

Match to Query 5823: 1170.562448 from(586.288500,2+)

Title: OECHL100317\_15.5113.5113.2.dta

Data file \\Boromir\masse\Data LTQ-Orbitrap\Chrystelle Lacroix\Etude clinique sJPU\OECHL100317\_15.raw

**Monoisotopic mass of neutral peptide Mr(calc):** 1170.562897 **Fixed modifications:** Carbamidomethyl (C) (apply to specified residues or termini only) **Ions Score:** 61

**Expect:** 5e-005 **Matches :** 42/120 fragment ions using 95 most intense peaks ([help](#))

| # | b          | b <sup>++</sup> | b <sup>*</sup> | b <sup>*++</sup> | b <sup>0</sup> | b <sup>0++</sup> | Seq. | y | y <sup>++</sup> | y <sup>*</sup> | y <sup>*++</sup> | y <sup>0</sup> | y <sup>0++</sup> | #  |
|---|------------|-----------------|----------------|------------------|----------------|------------------|------|---|-----------------|----------------|------------------|----------------|------------------|----|
| 1 | 115.050203 | 58.028740       | 98.023654      | 49.515465        |                |                  | N    |   |                 |                |                  |                |                  | 12 |

|    |            |            |            |            |            |            |   |             |            |             |            |             |            |    |
|----|------------|------------|------------|------------|------------|------------|---|-------------|------------|-------------|------------|-------------|------------|----|
| 2  | 186.087317 | 93.547296  | 169.060768 | 85.034022  |            |            | A | 1057.527263 | 529.267270 | 1040.500714 | 520.753995 | 1039.516698 | 520.261987 | 11 |
| 3  | 257.124431 | 129.065854 | 240.097882 | 120.552579 |            |            | A | 986.490149  | 493.748713 | 969.463600  | 485.235438 | 968.479584  | 484.743430 | 10 |
| 4  | 372.151374 | 186.579325 | 355.124825 | 178.066051 | 354.140809 | 177.574043 | D | 915.453035  | 458.230156 | 898.426486  | 449.716881 | 897.442470  | 449.224873 | 9  |
| 5  | 459.183402 | 230.095339 | 442.156853 | 221.582065 | 441.172837 | 221.090057 | S | 800.426092  | 400.716684 | 783.399543  | 392.203410 | 782.415527  | 391.711402 | 8  |
| 6  | 546.215430 | 273.611353 | 529.188881 | 265.098079 | 528.204865 | 264.606071 | S | 713.394064  | 357.200670 | 696.367515  | 348.687396 | 695.383499  | 348.195388 | 7  |
| 7  | 645.283844 | 323.145560 | 628.257295 | 314.632286 | 627.273279 | 314.140278 | V | 626.362036  | 313.684656 | 609.335487  | 305.171382 | 608.351471  | 304.679374 | 6  |
| 8  | 742.336608 | 371.671942 | 725.310059 | 363.158668 | 724.326043 | 362.666660 | P | 527.293622  | 264.150449 | 510.267073  | 255.637175 | 509.283057  | 255.145167 | 5  |
| 9  | 829.368636 | 415.187956 | 812.342087 | 406.674682 | 811.358071 | 406.182674 | S | 430.240858  | 215.624067 | 413.214309  | 207.110793 | 412.230293  | 206.618785 | 4  |
| 10 | 900.405750 | 450.706513 | 883.379201 | 442.193239 | 882.395185 | 441.701231 | A | 343.208830  | 172.108053 | 326.182281  | 163.594779 |             |            | 3  |
| 11 | 997.458514 | 499.232895 | 980.431965 | 490.719621 | 979.447949 | 490.227613 | P | 272.171716  | 136.589496 | 255.145167  | 128.076222 |             |            | 2  |
| 12 |            |            |            |            |            |            | R | 175.118952  | 88.063114  | 158.092403  | 79.549840  |             |            | 1  |

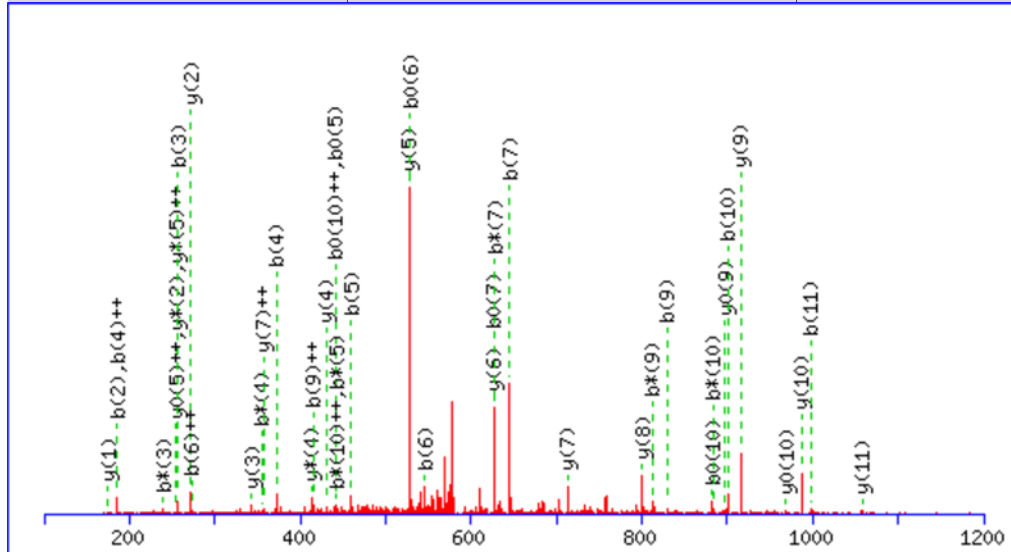

## Peptide View

MS/MS Fragmentation of **AGSFKVATQER**

Found in **IP100643388**, Tax\_Id=9606 Gene\_Symbol=RGL4 RGL4 protein

Experiment: 27 - NOPD3 Fraction: NOPD3

Match to Query 6211: 1192.623048 from(597.318800,2+)

Title: OECHL100317\_15.2345.2345.2.dta

Data file \\Boromir\masse\Data LTQ-Orbitrap\Chrystelle Lacroix\Etude clinique sJPU\OECHL100317\_15.raw

**Monoisotopic mass of neutral peptide Mr(calc):** 1192.620026**Fixed modifications:** Carbamidomethyl (C) (apply to specified residues or termini only)**Ions Score:** 53**Expect:** 0.00038**Matches :** 25/106 fragment ions using 40 most intense peaks ([help](#))

| #  | b                 | b <sup>++</sup> | b*                | b <sup>***</sup>  | b <sup>0</sup>    | b <sup>0++</sup>  | Seq. | y                  | y <sup>++</sup>   | y*                | y <sup>***</sup>  | y <sup>0</sup>     | y <sup>0++</sup>  | #  |
|----|-------------------|-----------------|-------------------|-------------------|-------------------|-------------------|------|--------------------|-------------------|-------------------|-------------------|--------------------|-------------------|----|
| 1  | 72.044390         | 36.525833       |                   |                   |                   |                   | A    |                    |                   |                   |                   |                    |                   | 11 |
| 2  | 129.065854        | 65.036565       |                   |                   |                   |                   | G    | <b>1122.590199</b> | 561.798738        | 1105.563650       | 553.285463        | 1104.579634        | 552.793455        | 10 |
| 3  | <b>216.097882</b> | 108.552579      |                   |                   | 198.087317        | 99.547296         | S    | <b>1065.568735</b> | <b>533.288006</b> | 1048.542186       | <b>524.774731</b> | <b>1047.558170</b> | <b>524.282723</b> | 9  |
| 4  | <b>363.166296</b> | 182.086786      |                   |                   | 345.155731        | 173.081504        | F    | <b>978.536707</b>  | <b>489.771992</b> | <b>961.510158</b> | 481.258717        | <b>960.526142</b>  | 480.766709        | 8  |
| 5  | 491.261259        | 246.134267      | 474.234710        | 237.620993        | 473.250694        | 237.128985        | K    | <b>831.468293</b>  | 416.237785        | 814.441744        | 407.724510        | 813.457728         | 407.232502        | 7  |
| 6  | 590.329673        | 295.668475      | 573.303124        | 287.155200        | 572.319108        | 286.663192        | V    | <b>703.373330</b>  | 352.190303        | 686.346781        | 343.677029        | 685.362765         | 343.185021        | 6  |
| 7  | 661.366787        | 331.187032      | 644.340238        | 322.673757        | 643.356222        | 322.181749        | A    | 604.304916         | 302.656096        | 587.278367        | 294.142822        | 586.294351         | 293.650814        | 5  |
| 8  | 762.414466        | 381.710871      | <b>745.387917</b> | <b>373.197597</b> | <b>744.403901</b> | <b>372.705589</b> | T    | <b>533.267802</b>  | 267.137539        | 516.241253        | 258.624265        | 515.257237         | 258.132257        | 4  |
| 9  | 890.473044        | 445.740160      | <b>873.446495</b> | 437.226886        | 872.462479        | 436.734878        | Q    | <b>432.220123</b>  | <b>216.613700</b> | 415.193574        | 208.100425        | 414.209558         | 207.608417        | 3  |
| 10 | 1019.515637       | 510.261457      | 1002.489088       | 501.748182        | 1001.505072       | 501.256174        | E    | <b>304.161545</b>  | 152.584411        | 287.134996        | 144.071136        | 286.150980         | 143.579128        | 2  |
| 11 |                   |                 |                   |                   |                   |                   | R    | 175.118952         | 88.063114         | 158.092403        | 79.549840         |                    |                   | 1  |

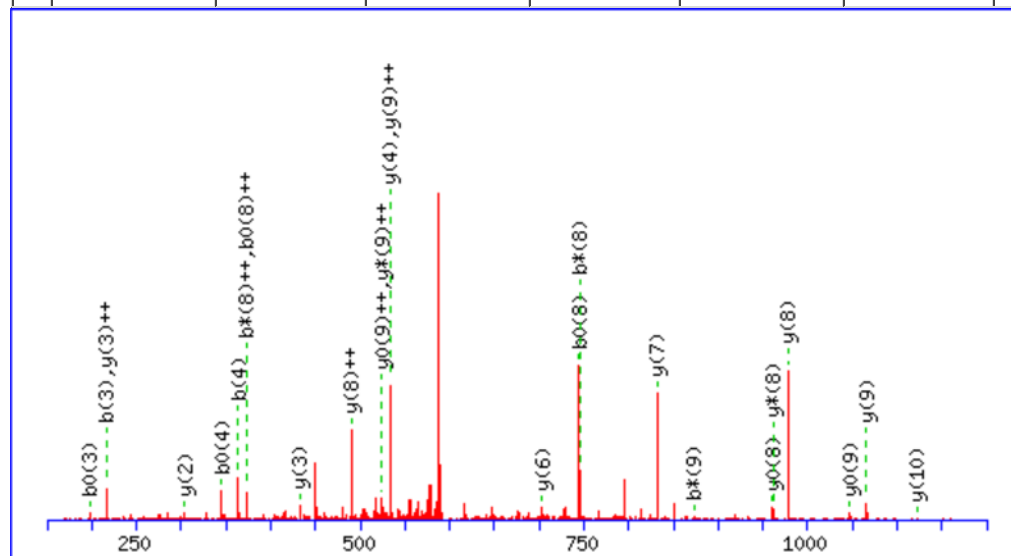

## Peptide View

MS/MS Fragmentation of **AHGQESAI FNEVAPGYFSR**

Found in **IPI00170635**, Tax\_Id=9606 Gene\_Symbol=SECTM1 Secreted and transmembrane protein 1

**Experiment:** 09 - S\_C-3 **Fraction:** S\_C-3

Match to Query 13488: 2078.983448 from(1040.499000,2+)

Title: OECHL100317\_13.16098.16098.2.dta

Data file \\Boromir\masse\Data LTQ-Orbitrap\Chrystelle Lacroix\Etude clinique sJPU\OECHL100317\_13.raw

**Monoisotopic mass of neutral peptide Mr(calc):** 2078.980988**Fixed modifications:** Carbamidomethyl (C) (apply to specified residues or termini only)**Ions Score:** 90

**Expect:** 1.8e-007**Matches :** 26/200 fragment ions using 50 most intense peaks ([help](#))

| #  | b                  | b <sup>++</sup>   | b*          | b <sup>*++</sup> | b <sup>0</sup>    | b <sup>0++</sup> | Seq. | y                  | y <sup>++</sup> | y*          | y <sup>*++</sup>  | y <sup>0</sup> | y <sup>0++</sup>  | #  |
|----|--------------------|-------------------|-------------|------------------|-------------------|------------------|------|--------------------|-----------------|-------------|-------------------|----------------|-------------------|----|
| 1  | 72.044390          | 36.525833         |             |                  |                   |                  | A    |                    |                 |             |                   |                |                   | 19 |
| 2  | 209.103302         | 105.055289        |             |                  |                   |                  | H    | 2008.951166        | 1004.979221     | 1991.924617 | 996.465947        | 1990.940601    | 995.973939        | 18 |
| 3  | 266.124766         | 133.566021        |             |                  |                   |                  | G    | <b>1871.892254</b> | 936.449765      | 1854.865705 | 927.936491        | 1853.881689    | 927.444483        | 17 |
| 4  | 394.183344         | 197.595310        | 377.156795  | 189.082035       |                   |                  | Q    | <b>1814.870790</b> | 907.939033      | 1797.844241 | 899.425759        | 1796.860225    | 898.933751        | 16 |
| 5  | <b>523.225937</b>  | 262.116607        | 506.199388  | 253.603332       | 505.215372        | 253.111324       | E    | <b>1686.812212</b> | 843.909744      | 1669.785663 | 835.396470        | 1668.801647    | 834.904462        | 15 |
| 6  | 610.257965         | 305.632621        | 593.231416  | 297.119346       | 592.247400        | 296.627338       | S    | <b>1557.769619</b> | 779.388448      | 1540.743070 | 770.875173        | 1539.759054    | 770.383165        | 14 |
| 7  | <b>681.295079</b>  | 341.151178        | 664.268530  | 332.637903       | <b>663.284514</b> | 332.145895       | A    | <b>1470.737591</b> | 735.872434      | 1453.711042 | <b>727.359159</b> | 1452.727026    | <b>726.867151</b> | 13 |
| 8  | <b>794.379143</b>  | 397.693210        | 777.352594  | 389.179935       | 776.368578        | 388.687927       | I    | <b>1399.700477</b> | 700.353877      | 1382.673928 | 691.840602        | 1381.689912    | 691.348594        | 12 |
| 9  | 941.447557         | 471.227417        | 924.421008  | 462.714142       | 923.436992        | 462.222134       | F    | <b>1286.616413</b> | 643.811845      | 1269.589864 | 635.298570        | 1268.605848    | 634.806562        | 11 |
| 10 | 1055.490484        | 528.248880        | 1038.463935 | 519.735606       | 1037.479919       | 519.243597       | N    | <b>1139.547999</b> | 570.277638      | 1122.521450 | 561.764363        | 1121.537434    | 561.272355        | 10 |
| 11 | <b>1184.533077</b> | 592.770176        | 1167.506528 | 584.256902       | 1166.522512       | 583.764894       | E    | <b>1025.505072</b> | 513.256174      | 1008.478523 | 504.742900        | 1007.494507    | 504.250892        | 9  |
| 12 | <b>1283.601491</b> | 642.304383        | 1266.574942 | 633.791109       | 1265.590926       | 633.299101       | V    | <b>896.462479</b>  | 448.734878      | 879.435930  | 440.221603        | 878.451914     | 439.729595        | 8  |
| 13 | <b>1354.638605</b> | 677.822940        | 1337.612056 | 669.309666       | 1336.628040       | 668.817658       | A    | <b>797.394065</b>  | 399.200671      | 780.367516  | 390.687396        | 779.383500     | 390.195388        | 7  |
| 14 | 1451.691369        | <b>726.349322</b> | 1434.664820 | 717.836048       | 1433.680804       | 717.344040       | P    | <b>726.356951</b>  | 363.682114      | 709.330402  | 355.168839        | 708.346386     | 354.676831        | 6  |
| 15 | 1508.712833        | 754.860054        | 1491.686284 | 746.346780       | 1490.702268       | 745.854772       | G    | <b>629.304187</b>  | 315.155732      | 612.277638  | 306.642457        | 611.293622     | 306.150449        | 5  |
| 16 | <b>1671.776162</b> | 836.391719        | 1654.749613 | 827.878445       | 1653.765597       | 827.386436       | Y    | 572.282723         | 286.645000      | 555.256174  | 278.131725        | 554.272158     | 277.639717        | 4  |
| 17 | 1818.844576        | 909.925926        | 1801.818027 | 901.412652       | 1800.834011       | 900.920643       | F    | <b>409.219394</b>  | 205.113335      | 392.192845  | 196.600061        | 391.208829     | 196.108053        | 3  |
| 18 | <b>1905.876604</b> | 953.441940        | 1888.850055 | 944.928666       | 1887.866039       | 944.436658       | S    | 262.150980         | 131.579128      | 245.124431  | 123.065854        | 244.140415     | 122.573846        | 2  |
| 19 |                    |                   |             |                  |                   |                  | R    | 175.118952         | 88.063114       | 158.092403  | 79.549840         |                |                   | 1  |

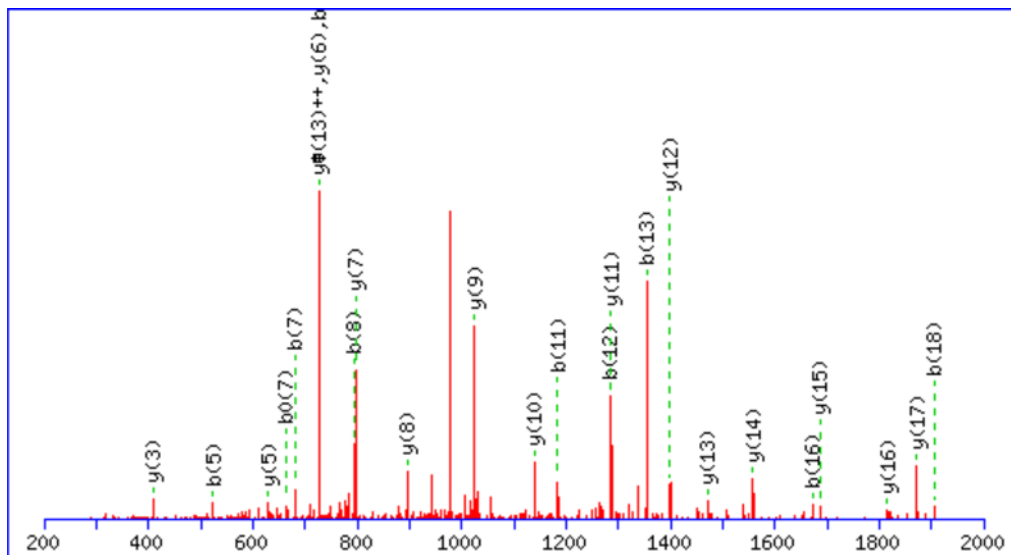

## Peptide View

MS/MS Fragmentation of **NPVLQQDAHSSVTITPQR**

Found in **IPI00410488**, Tax\_Id=9606 Gene\_Symbol=CD276 Isoform 1 of CD276 antigen

**Experiment:** 09 - S\_C-3 **Fraction:** S\_C-3

Match to Query 13113: 1990.023848 from(996.019200,2+)

Title: OECHL100317\_13.9052.9052.2.dta

Data file \\Boromir\masse\Data LTQ-Orbitrap\Chrystelle Lacroix\Etude clinique sJPU\OECHL100317\_13.raw

**Monoisotopic mass of neutral peptide Mr(calc):** 1990.023209 **Fixed modifications:** Carbamidomethyl (C) (apply to specified residues or termini only) **Ions Score:** 86

**Expect:** 3.5e-007 **Matches :** 45/186 fragment ions using 80 most intense peaks ([help](#))

| # | b                 | b <sup>++</sup> | b*                | b* <sup>++</sup> | b <sup>0</sup> | b <sup>0++</sup> | Seq. | y                  | y <sup>++</sup>   | y*                 | y* <sup>++</sup>  | y <sup>0</sup> | y <sup>0++</sup>  | #  |
|---|-------------------|-----------------|-------------------|------------------|----------------|------------------|------|--------------------|-------------------|--------------------|-------------------|----------------|-------------------|----|
| 1 | 115.050203        | 58.028740       | 98.023654         | 49.515465        |                |                  | N    |                    |                   |                    |                   |                |                   | 18 |
| 2 | 212.102967        | 106.555121      | 195.076418        | 98.041847        |                |                  | P    | 1876.987553        | 938.997415        | 1859.961004        | 930.484140        | 1858.976988    | 929.992132        | 17 |
| 3 | <b>311.171381</b> | 156.089328      | <b>294.144832</b> | 147.576054       |                |                  | V    | <b>1779.934789</b> | <b>890.471033</b> | 1762.908240        | 881.957758        | 1761.924224    | 881.465750        | 16 |
| 4 | 424.255445        | 212.631361      | 407.228896        | 204.118086       |                |                  | L    | <b>1680.866375</b> | <b>840.936826</b> | <b>1663.839826</b> | <b>832.423551</b> | 1662.855810    | <b>831.931543</b> | 15 |
| 5 | <b>552.314023</b> | 276.660650      | <b>535.287474</b> | 268.147375       |                |                  | Q    | <b>1567.782311</b> | 784.394794        | 1550.755762        | <b>775.881519</b> | 1549.771746    | <b>775.389511</b> | 14 |
| 6 | <b>680.372601</b> | 340.689939      | <b>663.346052</b> | 332.176664       |                |                  | Q    | <b>1439.723733</b> | 720.365505        | 1422.697184        | 711.852230        | 1421.713168    | 711.360222        | 13 |



|    |                    |                   |                    |                   |                    |                   |          |                    |            |                   |            |             |            |           |
|----|--------------------|-------------------|--------------------|-------------------|--------------------|-------------------|----------|--------------------|------------|-------------------|------------|-------------|------------|-----------|
| 7  | <b>795.399544</b>  | 398.203410        | 778.372995         | 389.690136        | 777.388979         | 389.198128        | <b>D</b> | <b>1311.665155</b> | 656.336215 | 1294.638606       | 647.822941 | 1293.654590 | 647.330933 | <b>12</b> |
| 8  | 866.436658         | 433.721967        | 849.410109         | 425.208693        | 848.426093         | 424.716685        | <b>A</b> | <b>1196.638212</b> | 598.822744 | 1179.611663       | 590.309470 | 1178.627647 | 589.817462 | <b>11</b> |
| 9  | 1003.495570        | <b>502.251423</b> | 986.469021         | 493.738149        | 985.485005         | 493.246141        | <b>H</b> | <b>1125.601098</b> | 563.304187 | 1108.574549       | 554.790913 | 1107.590533 | 554.298905 | <b>10</b> |
| 10 | <b>1090.527598</b> | 545.767437        | 1073.501049        | 537.254163        | 1072.517033        | 536.762155        | <b>S</b> | <b>988.542186</b>  | 494.774731 | 971.515637        | 486.261457 | 970.531621  | 485.769449 | <b>9</b>  |
| 11 | 1177.559626        | 589.283451        | 1160.533077        | 580.770177        | 1159.549061        | 580.278169        | <b>S</b> | <b>901.510158</b>  | 451.258717 | 884.483609        | 442.745443 | 883.499593  | 442.253435 | <b>8</b>  |
| 12 | <b>1276.628040</b> | 638.817658        | <b>1259.601491</b> | 630.304384        | <b>1258.617475</b> | 629.812376        | <b>V</b> | <b>814.478130</b>  | 407.742703 | 797.451581        | 399.229428 | 796.467565  | 398.737420 | <b>7</b>  |
| 13 | 1377.675719        | 689.341498        | 1360.649170        | <b>680.828223</b> | <b>1359.665154</b> | <b>680.336215</b> | <b>T</b> | <b>715.409716</b>  | 358.208496 | 698.383167        | 349.695221 | 697.399151  | 349.203213 | <b>6</b>  |
| 14 | <b>1490.759783</b> | 745.883530        | <b>1473.733234</b> | 737.370255        | <b>1472.749218</b> | 736.878247        | <b>I</b> | <b>614.362037</b>  | 307.684656 | 597.335488        | 299.171382 | 596.351472  | 298.679374 | <b>5</b>  |
| 15 | <b>1591.807462</b> | 796.407369        | <b>1574.780913</b> | 787.894095        | 1573.796897        | 787.402087        | <b>T</b> | <b>501.277973</b>  | 251.142624 | 484.251424        | 242.629350 | 483.267408  | 242.137342 | <b>4</b>  |
| 16 | 1688.860226        | 844.933751        | 1671.833677        | 836.420477        | 1670.849661        | 835.928469        | <b>P</b> | <b>400.230294</b>  | 200.618785 | <b>383.203745</b> | 192.105510 |             |            | <b>3</b>  |
| 17 | <b>1816.918804</b> | 908.963040        | <b>1799.892255</b> | 900.449766        | 1798.908239        | 899.957758        | <b>Q</b> | 303.177530         | 152.092403 | 286.150981        | 143.579128 |             |            | <b>2</b>  |
| 18 |                    |                   |                    |                   |                    |                   | <b>R</b> | 175.118952         | 88.063114  | 158.092403        | 79.549839  |             |            | <b>1</b>  |

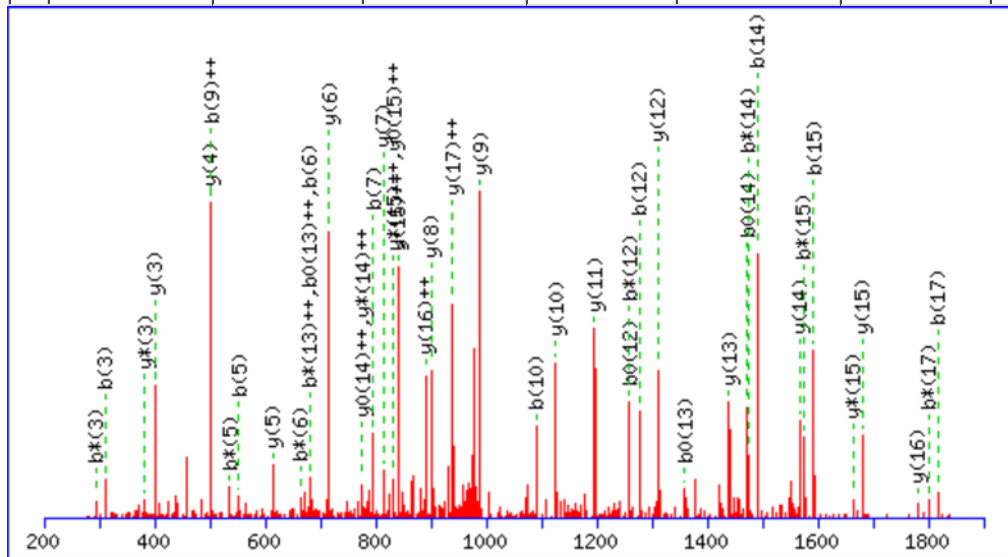

## Peptide View

MS/MS Fragmentation of **EVGPTNADPVCLAK**

Found in **IPI00017601**, Tax\_Id=9606 Gene\_Symbol=CP Ceruloplasmin

Experiment: 09 - S\_C-3 Fraction: S\_C-3

Match to Query 9447: 1469.718448 from(735.866500,2+)

Title: OECHL100317\_13.10352.10352.2.dta

Data file \\Boromir\masse\Data LTQ-Orbitrap\Chrystelle Lacroix\Etude clinique sJPU\OECHL100317\_13.raw

**Monoisotopic mass of neutral peptide Mr(calc):** 1469.718430**Fixed modifications:** Carbamidomethyl (C) (apply to specified residues or termini only)**Ions Score:** 96**Expect:** 2.7e-008**Matches :** 13/134 fragment ions using 12 most intense peaks ([help](#))

| #  | b           | b <sup>++</sup> | b*          | b <sup>*++</sup> | b <sup>0</sup> | b <sup>0++</sup> | Seq. | y           | y <sup>++</sup> | y*          | y <sup>*++</sup> | y <sup>0</sup> | y <sup>0++</sup> | #  |
|----|-------------|-----------------|-------------|------------------|----------------|------------------|------|-------------|-----------------|-------------|------------------|----------------|------------------|----|
| 1  | 130.049869  | 65.528572       |             |                  | 112.039304     | 56.523290        | E    |             |                 |             |                  |                |                  | 14 |
| 2  | 229.118283  | 115.062780      |             |                  | 211.107718     | 106.057497       | V    | 1341.683114 | 671.345195      | 1324.656565 | 662.831920       | 1323.672549    | 662.339912       | 13 |
| 3  | 286.139747  | 143.573512      |             |                  | 268.129182     | 134.568229       | G    | 1242.614700 | 621.810988      | 1225.588151 | 613.297713       | 1224.604135    | 612.805705       | 12 |
| 4  | 383.192511  | 192.099894      |             |                  | 365.181946     | 183.094611       | P    | 1185.593236 | 593.300256      | 1168.566687 | 584.786982       | 1167.582671    | 584.294973       | 11 |
| 5  | 484.240190  | 242.623733      |             |                  | 466.229625     | 233.618451       | T    | 1088.540472 | 544.773874      | 1071.513923 | 536.260600       | 1070.529907    | 535.768591       | 10 |
| 6  | 598.283117  | 299.645197      | 581.256568  | 291.131922       | 580.272552     | 290.639914       | N    | 987.492793  | 494.250034      | 970.466244  | 485.736760       | 969.482228     | 485.244752       | 9  |
| 7  | 669.320231  | 335.163754      | 652.293682  | 326.650479       | 651.309666     | 326.158471       | A    | 873.449866  | 437.228571      | 856.423317  | 428.715296       | 855.439301     | 428.223288       | 8  |
| 8  | 784.347174  | 392.677225      | 767.320625  | 384.163951       | 766.336609     | 383.671943       | D    | 802.412752  | 401.710014      | 785.386203  | 393.196739       | 784.402187     | 392.704731       | 7  |
| 9  | 881.399938  | 441.203607      | 864.373389  | 432.690333       | 863.389373     | 432.198325       | P    | 687.385809  | 344.196542      | 670.359260  | 335.683268       |                |                  | 6  |
| 10 | 980.468352  | 490.737814      | 963.441803  | 482.224539       | 962.457787     | 481.732531       | V    | 590.333045  | 295.670160      | 573.306496  | 287.156886       |                |                  | 5  |
| 11 | 1140.499001 | 570.753138      | 1123.472452 | 562.239864       | 1122.488436    | 561.747856       | C    | 491.264631  | 246.135953      | 474.238082  | 237.622679       |                |                  | 4  |
| 12 | 1253.583065 | 627.295170      | 1236.556516 | 618.781896       | 1235.572500    | 618.289888       | L    | 331.233982  | 166.120629      | 314.207433  | 157.607354       |                |                  | 3  |
| 13 | 1324.620179 | 662.813727      | 1307.593630 | 654.300453       | 1306.609614    | 653.808445       | A    | 218.149918  | 109.578597      | 201.123369  | 101.065322       |                |                  | 2  |
| 14 |             |                 |             |                  |                |                  | K    | 147.112804  | 74.060040       | 130.086255  | 65.546765        |                |                  | 1  |

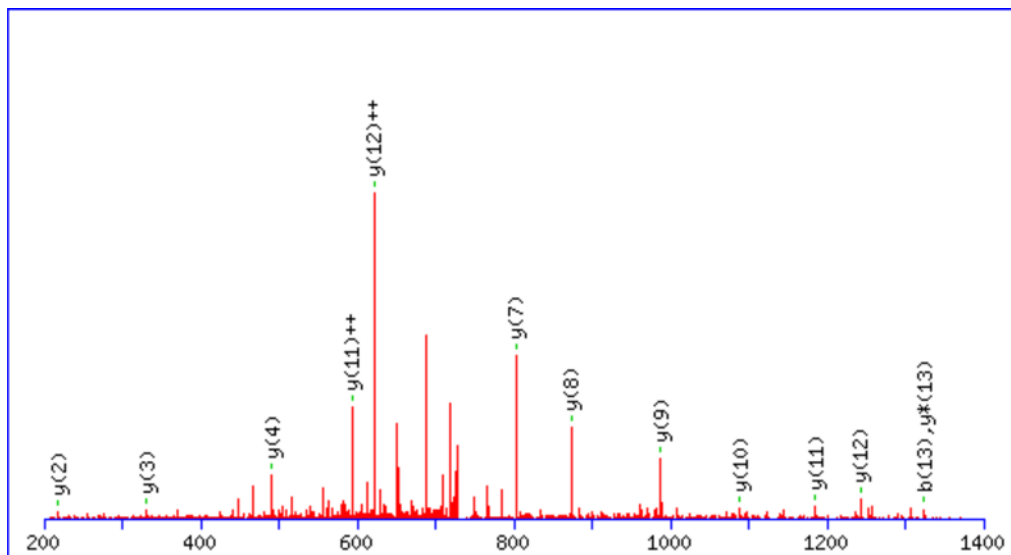

## Peptide View

MS/MS Fragmentation of **HSFKGEECPAGSHR**

Found in **IPI00922148**, Tax\_Id=9606 Gene\_Symbol=- cDNA FLJ53081, highly similar to Tumor necrosis factor receptor superfamily member 10C

**Experiment:** 09 - S\_C-3 **Fraction:** S\_C-3

Match to Query 10453: 1597.707848 from(799.861200,2+)

Title: OECHL100317\_13.2215.2215.2.dta

Data file \\Boromir\masse\Data LTQ-Orbitrap\Chrystelle Lacroix\Etude clinique sJPU\OECHL100317\_13.raw

**Monoisotopic mass of neutral peptide Mr(calc):** 1597.705566 **Fixed modifications:** Carbamidomethyl (C) (apply to specified residues or termini only) **Ions Score:** 82

**Expect:** 4.3e-007 **Matches :** 42/144 fragment ions using 65 most intense peaks ([help](#))

| # | b                 | b <sup>++</sup> | b*         | b* <sup>++</sup> | b <sup>0</sup>    | b <sup>0++</sup> | Seq.     | y                  | y <sup>++</sup>   | y*                 | y* <sup>++</sup>  | y <sup>0</sup>     | y <sup>0++</sup>  | #         |
|---|-------------------|-----------------|------------|------------------|-------------------|------------------|----------|--------------------|-------------------|--------------------|-------------------|--------------------|-------------------|-----------|
| 1 | 138.066188        | 69.536732       |            |                  |                   |                  | <b>H</b> |                    |                   |                    |                   |                    |                   | <b>14</b> |
| 2 | <b>225.098216</b> | 113.052746      |            |                  | 207.087651        | 104.047463       | <b>S</b> | <b>1461.653938</b> | <b>731.330607</b> | 1444.627389        | <b>722.817333</b> | <b>1443.643373</b> | 722.325325        | <b>13</b> |
| 3 | <b>372.166630</b> | 186.586953      |            |                  | <b>354.156065</b> | 177.581671       | <b>F</b> | <b>1374.621910</b> | <b>687.814593</b> | 1357.595361        | 679.301319        | 1356.611345        | 678.809311        | <b>12</b> |
| 4 | <b>500.261593</b> | 250.634435      | 483.235044 | 242.121160       | <b>482.251028</b> | 241.629152       | <b>K</b> | <b>1227.553496</b> | <b>614.280386</b> | <b>1210.526947</b> | <b>605.767112</b> | 1209.542931        | <b>605.275104</b> | <b>11</b> |
| 5 | 557.283057        | 279.145167      | 540.256508 | 270.631892       | <b>539.272492</b> | 270.139884       | <b>G</b> | <b>1099.458533</b> | 550.232905        | 1082.431984        | 541.719630        | 1081.447968        | 541.227622        | <b>10</b> |
| 6 | <b>686.325650</b> | 343.666463      | 669.299101 | 335.153189       | 668.315085        | 334.661181       | <b>E</b> | <b>1042.437069</b> | 521.722173        | 1025.410520        | 513.208898        | 1024.426504        | 512.716890        | <b>9</b>  |

|    |             |            |             |            |             |            |   |            |            |            |            |            |            |   |
|----|-------------|------------|-------------|------------|-------------|------------|---|------------|------------|------------|------------|------------|------------|---|
| 7  | 815.368243  | 408.187760 | 798.341694  | 399.674485 | 797.357678  | 399.182477 | E | 913.394476 | 457.200876 | 896.367927 | 448.687602 | 895.383911 | 448.195594 | 8 |
| 8  | 975.398892  | 488.203084 | 958.372343  | 479.689810 | 957.388327  | 479.197802 | C | 784.351883 | 392.679580 | 767.325334 | 384.166305 | 766.341318 | 383.674297 | 7 |
| 9  | 1072.451656 | 536.729466 | 1055.425107 | 528.216192 | 1054.441091 | 527.724184 | P | 624.321234 | 312.664255 | 607.294685 | 304.150981 | 606.310669 | 303.658973 | 6 |
| 10 | 1143.488770 | 572.248023 | 1126.462221 | 563.734749 | 1125.478205 | 563.242741 | A | 527.268470 | 264.137873 | 510.241921 | 255.624598 | 509.257905 | 255.132590 | 5 |
| 11 | 1200.510234 | 600.758755 | 1183.483685 | 592.245481 | 1182.499669 | 591.753473 | G | 456.231356 | 228.619316 | 439.204807 | 220.106041 | 438.220791 | 219.614033 | 4 |
| 12 | 1287.542262 | 644.274769 | 1270.515713 | 635.761495 | 1269.531697 | 635.269487 | S | 399.209892 | 200.108584 | 382.183343 | 191.595309 | 381.199327 | 191.103301 | 3 |
| 13 | 1424.601174 | 712.804225 | 1407.574625 | 704.290951 | 1406.590609 | 703.798943 | H | 312.177864 | 156.592570 | 295.151315 | 148.079295 |            |            | 2 |
| 14 |             |            |             |            |             |            | R | 175.118952 | 88.063114  | 158.092403 | 79.549839  |            |            | 1 |

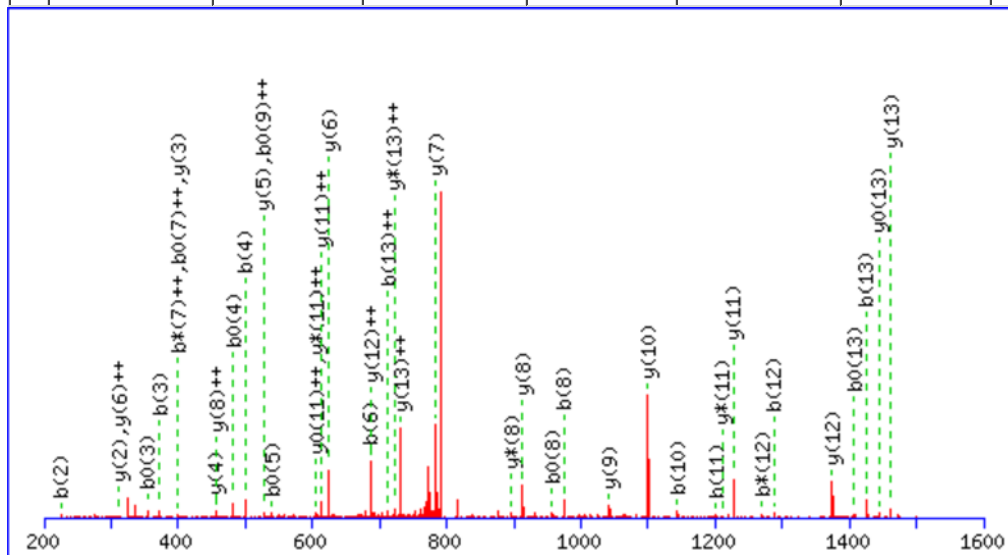

## Peptide View

MS/MS Fragmentation of **SDAAVDTSSSEITTK**

Found in **IP100412977**, Tax\_Id=9606 Gene\_Symbol=- Prothymosin alpha

Experiment: 09 - S\_C-3 Fraction: S\_C-3

Match to Query 9393: 1465.679648 from(733.847100,2+)

Title: OECHL100317\_13.8912.8912.2.dta

Data file \\Boromir\masse\Data LTQ-Orbitrap\Chrystelle Lacroix\Etude clinique sJPU\OECHL100317\_13.raw

**Monoisotopic mass of neutral peptide Mr(calc): 1465.678391** Fixed modifications: Carbamidomethyl (C) (apply to specified residues or termini only) Variable

**modifications:** N-term : Acetyl (N-term) **Ions Score:** 66 **Expect:** 2e-005 **Matches :** 24/128 fragment ions using 36 most intense peaks ([help](#))

| #  | b           | b <sup>++</sup> | b <sup>0</sup> | b <sup>0++</sup> | Seq. | y           | y <sup>++</sup> | y*          | y* <sup>++</sup> | y <sup>0</sup> | y <sup>0++</sup> | #  |
|----|-------------|-----------------|----------------|------------------|------|-------------|-----------------|-------------|------------------|----------------|------------------|----|
| 1  | 130.049869  | 65.528572       | 112.039304     | 56.523290        | S    |             |                 |             |                  |                |                  | 14 |
| 2  | 245.076812  | 123.042044      | 227.066247     | 114.036761       | D    | 1337.643082 | 669.325179      | 1320.616533 | 660.811905       | 1319.632517    | 660.319897       | 13 |
| 3  | 316.113926  | 158.560601      | 298.103361     | 149.555319       | A    | 1222.616139 | 611.811708      | 1205.589590 | 603.298433       | 1204.605574    | 602.806425       | 12 |
| 4  | 387.151040  | 194.079158      | 369.140475     | 185.073875       | A    | 1151.579025 | 576.293151      | 1134.552476 | 567.779876       | 1133.568460    | 567.287868       | 11 |
| 5  | 486.219454  | 243.613365      | 468.208889     | 234.608082       | V    | 1080.541911 | 540.774594      | 1063.515362 | 532.261319       | 1062.531346    | 531.769311       | 10 |
| 6  | 601.246397  | 301.126837      | 583.235832     | 292.121554       | D    | 981.473497  | 491.240387      | 964.446948  | 482.727112       | 963.462932     | 482.235104       | 9  |
| 7  | 702.294076  | 351.650676      | 684.283511     | 342.645394       | T    | 866.446554  | 433.726915      | 849.420005  | 425.213641       | 848.435989     | 424.721633       | 8  |
| 8  | 789.326104  | 395.166690      | 771.315539     | 386.161408       | S    | 765.398875  | 383.203076      | 748.372326  | 374.689801       | 747.388310     | 374.197793       | 7  |
| 9  | 876.358132  | 438.682704      | 858.347567     | 429.677421       | S    | 678.366847  | 339.687062      | 661.340298  | 331.173787       | 660.356282     | 330.681779       | 6  |
| 10 | 1005.400725 | 503.204001      | 987.390160     | 494.198718       | E    | 591.334819  | 296.171048      | 574.308270  | 287.657773       | 573.324254     | 287.165765       | 5  |
| 11 | 1118.484789 | 559.746033      | 1100.474224    | 550.740750       | I    | 462.292226  | 231.649751      | 445.265677  | 223.136477       | 444.281661     | 222.644469       | 4  |
| 12 | 1219.532468 | 610.269872      | 1201.521903    | 601.264590       | T    | 349.208162  | 175.107719      | 332.181613  | 166.594445       | 331.197597     | 166.102437       | 3  |
| 13 | 1320.580147 | 660.793712      | 1302.569582    | 651.788429       | T    | 248.160483  | 124.583879      | 231.133934  | 116.070605       | 230.149918     | 115.578597       | 2  |
| 14 |             |                 |                |                  | K    | 147.112804  | 74.060040       | 130.086255  | 65.546765        |                |                  | 1  |

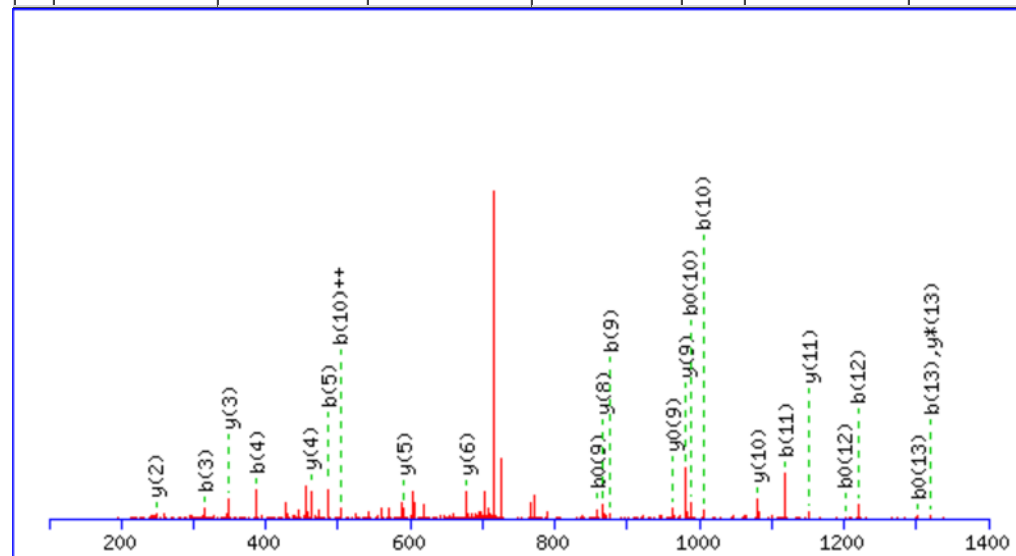

## Peptide View

MS/MS Fragmentation of **DFSLTSSSQTPGATK**

Found in **IPI00291300**, Tax\_Id=9606 Gene\_Symbol=PODXL2 Putative uncharacterized protein PODXL2

**Experiment:** 09 - S\_C-3 **Fraction:** S\_C-3

Match to Query 9938: 1525.723048 from(763.868800,2+)

Title: OECHL100317\_13.9935.9935.2.dta

Data file \\Boromir\masse\Data LTQ-Orbitrap\Chrystelle Lacroix\Etude clinique sJPU\OECHL100317\_13.raw

**Monoisotopic mass of neutral peptide Mr(calc):** 1525.726028**Fixed modifications:** Carbamidomethyl (C) (apply to specified residues or termini only)**Ions Score:** 72

**Expect:** 7.4e-006**Matches :** 26/150 fragment ions using 37 most intense peaks ([help](#))

| #  | b                  | b <sup>++</sup> | b*                 | b <sup>*++</sup> | b <sup>0</sup>    | b <sup>0++</sup> | Seq.     | y                  | y <sup>++</sup>   | y*          | y <sup>*++</sup>  | y <sup>0</sup> | y <sup>0++</sup>  | #         |
|----|--------------------|-----------------|--------------------|------------------|-------------------|------------------|----------|--------------------|-------------------|-------------|-------------------|----------------|-------------------|-----------|
| 1  | 116.034219         | 58.520748       |                    |                  | 98.023654         | 49.515465        | <b>D</b> |                    |                   |             |                   |                |                   | <b>15</b> |
| 2  | <b>263.102633</b>  | 132.054954      |                    |                  | 245.092068        | 123.049672       | <b>F</b> | 1411.706351        | 706.356813        | 1394.679802 | 697.843539        | 1393.695786    | 697.351531        | <b>14</b> |
| 3  | 350.134661         | 175.570968      |                    |                  | <b>332.124096</b> | 166.565686       | <b>S</b> | 1264.637937        | <b>632.822607</b> | 1247.611388 | <b>624.309332</b> | 1246.627372    | <b>623.817324</b> | <b>13</b> |
| 4  | 463.218725         | 232.113001      |                    |                  | <b>445.208160</b> | 223.107718       | <b>L</b> | <b>1177.605909</b> | 589.306592        | 1160.579360 | 580.793318        | 1159.595344    | 580.301310        | <b>12</b> |
| 5  | <b>564.266404</b>  | 282.636840      |                    |                  | 546.255839        | 273.631558       | <b>T</b> | <b>1064.521845</b> | 532.764561        | 1047.495296 | 524.251286        | 1046.511280    | 523.759278        | <b>11</b> |
| 6  | 651.298432         | 326.152854      |                    |                  | <b>633.287867</b> | 317.147572       | <b>S</b> | <b>963.474166</b>  | 482.240721        | 946.447617  | <b>473.727446</b> | 945.463601     | <b>473.235438</b> | <b>10</b> |
| 7  | 738.330460         | 369.668868      |                    |                  | 720.319895        | 360.663586       | <b>S</b> | <b>876.442138</b>  | 438.724707        | 859.415589  | 430.211432        | 858.431573     | 429.719424        | <b>9</b>  |
| 8  | <b>825.362488</b>  | 413.184882      |                    |                  | 807.351923        | 404.179599       | <b>S</b> | 789.410110         | 395.208693        | 772.383561  | 386.695418        | 771.399545     | 386.203410        | <b>8</b>  |
| 9  | <b>953.421066</b>  | 477.214171      | 936.394517         | 468.700897       | 935.410501        | 468.208889       | <b>Q</b> | <b>702.378082</b>  | 351.692679        | 685.351533  | 343.179404        | 684.367517     | 342.687396        | <b>7</b>  |
| 10 | <b>1054.468745</b> | 527.738010      | 1037.442196        | 519.224736       | 1036.458180       | 518.732728       | <b>T</b> | <b>574.319504</b>  | 287.663390        | 557.292955  | 279.150115        | 556.308939     | 278.658107        | <b>6</b>  |
| 11 | 1151.521509        | 576.264392      | <b>1134.494960</b> | 567.751118       | 1133.510944       | 567.259110       | <b>P</b> | <b>473.271825</b>  | 237.139550        | 456.245276  | 228.626276        | 455.261260     | 228.134268        | <b>5</b>  |
| 12 | <b>1208.542973</b> | 604.775124      | 1191.516424        | 596.261850       | 1190.532408       | 595.769842       | <b>G</b> | <b>376.219061</b>  | 188.613168        | 359.192512  | 180.099894        | 358.208496     | 179.607886        | <b>4</b>  |
| 13 | <b>1279.580087</b> | 640.293681      | 1262.553538        | 631.780407       | 1261.569522       | 631.288399       | <b>A</b> | 319.197597         | 160.102436        | 302.171048  | 151.589162        | 301.187032     | 151.097154        | <b>3</b>  |
| 14 | <b>1380.627766</b> | 690.817521      | 1363.601217        | 682.304246       | 1362.617201       | 681.812238       | <b>T</b> | <b>248.160483</b>  | 124.583879        | 231.133934  | 116.070605        | 230.149918     | 115.578597        | <b>2</b>  |
| 15 |                    |                 |                    |                  |                   |                  | <b>K</b> | 147.112804         | 74.060040         | 130.086255  | 65.546765         |                |                   | <b>1</b>  |

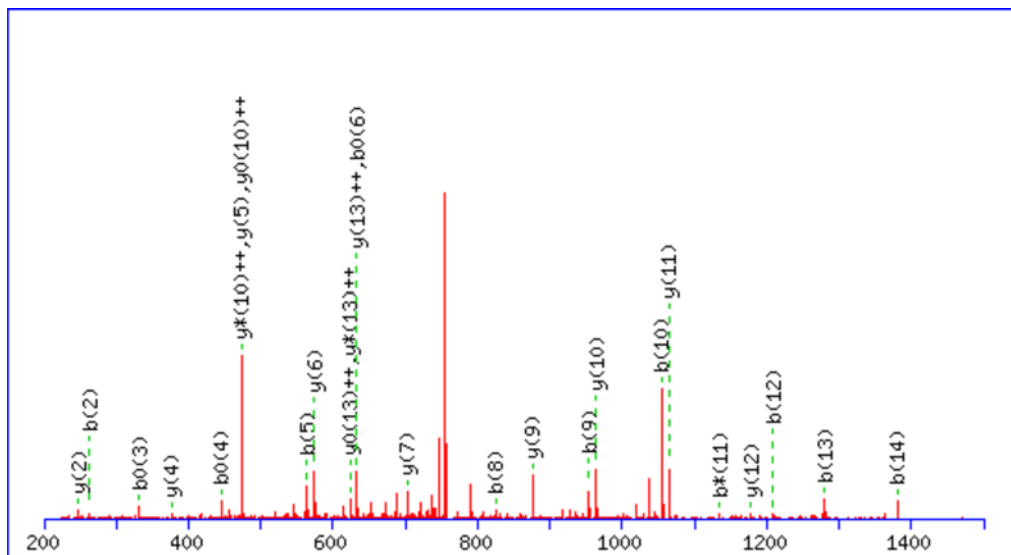

## Peptide View

MS/MS Fragmentation of **SSEDPNEDIVER**

Found in **IPI00178926**, Tax\_Id=9606 Gene\_Symbol=IGJ Immunoglobulin J chain

**Experiment:** 09 - S\_C-3 **Fraction:** S\_C-3

Match to Query 8612: 1388.606648 from(695.310600,2+)

Title: OECHL100317\_13.6542.6542.2.dta

Data file \\Boromir\masse\Data LTQ-Orbitrap\Chrystelle Lacroix\Etude clinique sJPU\OECHL100317\_13.raw

**Monoisotopic mass of neutral peptide Mr(calc):** 1388.605545 **Fixed modifications:** Carbamidomethyl (C) (apply to specified residues or termini only) **Ions Score:** 61

**Expect:** 3.4e-005 **Matches :** 34/120 fragment ions using 48 most intense peaks ([help](#))

| # | b                 | b <sup>++</sup> | b*         | b <sup>*++</sup> | b <sup>0</sup>    | b <sup>0++</sup> | Seq. | y                  | y <sup>++</sup>   | y*                 | y <sup>*++</sup> | y <sup>0</sup>     | y <sup>0++</sup> | #  |
|---|-------------------|-----------------|------------|------------------|-------------------|------------------|------|--------------------|-------------------|--------------------|------------------|--------------------|------------------|----|
| 1 | 88.039304         | 44.523290       |            |                  | 70.028739         | 35.518008        | S    |                    |                   |                    |                  |                    |                  | 12 |
| 2 | 175.071332        | 88.039304       |            |                  | 157.060767        | 79.034021        | S    | <b>1302.580814</b> | 651.794045        | 1285.554265        | 643.280771       | 1284.570249        | 642.788763       | 11 |
| 3 | <b>304.113925</b> | 152.560600      |            |                  | <b>286.103360</b> | 143.555318       | E    | <b>1215.548786</b> | <b>608.278031</b> | <b>1198.522237</b> | 599.764757       | <b>1197.538221</b> | 599.272749       | 10 |
| 4 | <b>419.140868</b> | 210.074072      |            |                  | <b>401.130303</b> | 201.068790       | D    | <b>1086.506193</b> | <b>543.756735</b> | <b>1069.479644</b> | 535.243460       | <b>1068.495628</b> | 534.751452       | 9  |
| 5 | <b>516.193632</b> | 258.600454      |            |                  | 498.183067        | 249.595172       | P    | <b>971.479250</b>  | <b>486.243263</b> | 954.452701         | 477.729989       | 953.468685         | 477.237981       | 8  |
| 6 | 630.236559        | 315.621918      | 613.210010 | 307.108643       | 612.225994        | 306.616635       | N    | <b>874.426486</b>  | 437.716881        | 857.399937         | 429.203607       | 856.415921         | 428.711599       | 7  |

|    |                    |                   |                    |            |                    |            |          |                   |            |            |            |                   |            |          |
|----|--------------------|-------------------|--------------------|------------|--------------------|------------|----------|-------------------|------------|------------|------------|-------------------|------------|----------|
| 7  | <b>759.279152</b>  | 380.143214        | 742.252603         | 371.629940 | 741.268587         | 371.137932 | <b>E</b> | <b>760.383559</b> | 380.695418 | 743.357010 | 372.182143 | 742.372994        | 371.690135 | <b>6</b> |
| 8  | <b>874.306095</b>  | 437.656686        | 857.279546         | 429.143411 | 856.295530         | 428.651403 | <b>D</b> | <b>631.340966</b> | 316.174121 | 614.314417 | 307.660847 | 613.330401        | 307.168839 | <b>5</b> |
| 9  | <b>987.390159</b>  | 494.198718        | 970.363610         | 485.685443 | 969.379594         | 485.193435 | <b>I</b> | <b>516.314023</b> | 258.660650 | 499.287474 | 250.147375 | 498.303458        | 249.655367 | <b>4</b> |
| 10 | <b>1086.458573</b> | <b>543.732925</b> | <b>1069.432024</b> | 535.219650 | <b>1068.448008</b> | 534.727642 | <b>V</b> | <b>403.229959</b> | 202.118618 | 386.203410 | 193.605343 | 385.219394        | 193.113335 | <b>3</b> |
| 11 | <b>1215.501166</b> | <b>608.254221</b> | <b>1198.474617</b> | 599.740947 | <b>1197.490601</b> | 599.248939 | <b>E</b> | <b>304.161545</b> | 152.584411 | 287.134996 | 144.071136 | <b>286.150980</b> | 143.579128 | <b>2</b> |
| 12 |                    |                   |                    |            |                    |            | <b>R</b> | 175.118952        | 88.063114  | 158.092403 | 79.549839  |                   |            | <b>1</b> |

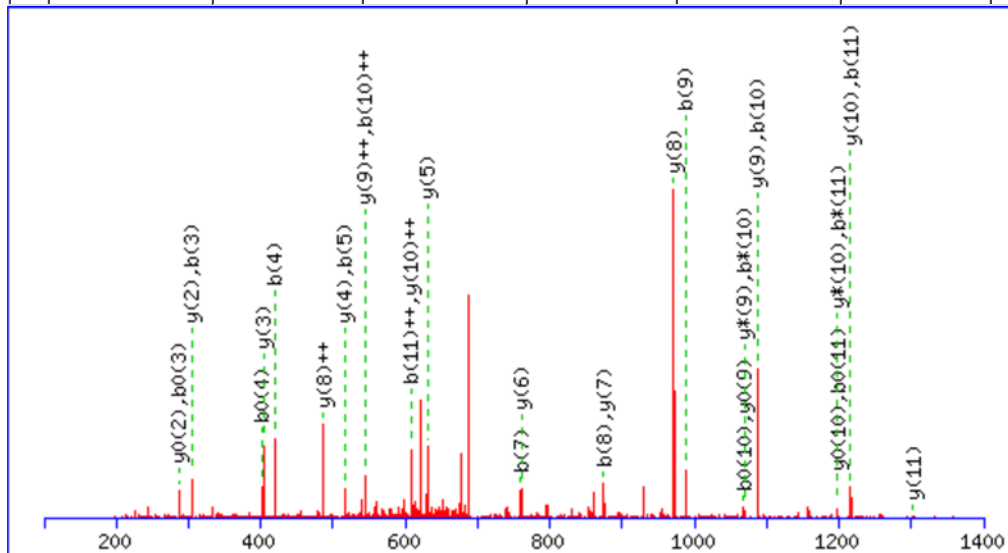

## Peptide View

MS/MS Fragmentation of **IESVLSSSGKR**

Found in **IP100018236**, Tax\_Id=9606 Gene\_Symbol=GM2A Ganglioside GM2 activator

Experiment: 09 - S\_C-3 Fraction: S\_C-3

Match to Query 5670: 1161.635648 from(581.825100,2+)

Title: OECHL100317\_13.5425.5425.2.dta

Data file \\Boromir\masse\Data LTQ-Orbitrap\Chrystelle Lacroix\Etude clinique sJPU\OECHL100317\_13.raw

**Monoisotopic mass of neutral peptide Mr(calc):** 1161.635330 **Fixed modifications:** Carbamidomethyl (C) (apply to specified residues or termini only) **Ions Score:** 51

**Expect:** 0.00046 **Matches :** 31/94 fragment ions using 66 most intense peaks ([help](#))

| # | <b>b</b> | <b>b<sup>++</sup></b> | <b>b<sup>*</sup></b> | <b>b<sup>*++</sup></b> | <b>b<sup>0</sup></b> | <b>b<sup>0++</sup></b> | Seq. | <b>y</b> | <b>y<sup>++</sup></b> | <b>y<sup>*</sup></b> | <b>y<sup>*++</sup></b> | <b>y<sup>0</sup></b> | <b>y<sup>0++</sup></b> | # |
|---|----------|-----------------------|----------------------|------------------------|----------------------|------------------------|------|----------|-----------------------|----------------------|------------------------|----------------------|------------------------|---|
|---|----------|-----------------------|----------------------|------------------------|----------------------|------------------------|------|----------|-----------------------|----------------------|------------------------|----------------------|------------------------|---|



|    |                   |                   |            |            |                   |            |   |                    |                   |                   |                   |                   |                   |  |  |    |
|----|-------------------|-------------------|------------|------------|-------------------|------------|---|--------------------|-------------------|-------------------|-------------------|-------------------|-------------------|--|--|----|
| 1  | 114.091340        | 57.549308         |            |            |                   |            | I |                    |                   |                   |                   |                   |                   |  |  | 11 |
| 2  | <b>243.133933</b> | 122.070605        |            |            | <b>225.123368</b> | 113.065322 | E | <b>1049.558562</b> | <b>525.282919</b> | 1032.532013       | 516.769645        | 1031.547997       | 516.277637        |  |  | 10 |
| 3  | <b>330.165961</b> | 165.586618        |            |            | <b>312.155396</b> | 156.581336 | S | <b>920.515969</b>  | <b>460.761623</b> | <b>903.489420</b> | 452.248348        | <b>902.505404</b> | <b>451.756340</b> |  |  | 9  |
| 4  | <b>429.234375</b> | <b>215.120826</b> |            |            | <b>411.223810</b> | 206.115543 | V | <b>833.483941</b>  | 417.245609        | 816.457392        | 408.732334        | 815.473376        | 408.240326        |  |  | 8  |
| 5  | 542.318439        | 271.662858        |            |            | 524.307874        | 262.657575 | L | <b>734.415527</b>  | 367.711402        | <b>717.388978</b> | 359.198127        | <b>716.404962</b> | 358.706119        |  |  | 7  |
| 6  | 629.350467        | 315.178872        |            |            | 611.339902        | 306.173589 | S | <b>621.331463</b>  | <b>311.169370</b> | 604.304914        | 302.656095        | <b>603.320898</b> | 302.164087        |  |  | 6  |
| 7  | <b>716.382495</b> | 358.694886        |            |            | <b>698.371930</b> | 349.689603 | S | <b>534.299435</b>  | 267.653356        | 517.272886        | 259.140081        | 516.288870        | 258.648073        |  |  | 5  |
| 8  | 803.414523        | 402.210899        |            |            | 785.403958        | 393.205617 | S | <b>447.267407</b>  | 224.137342        | 430.240858        | <b>215.624067</b> | <b>429.256842</b> | <b>215.132059</b> |  |  | 4  |
| 9  | 860.435987        | 430.721632        |            |            | 842.425422        | 421.716349 | G | <b>360.235379</b>  | 180.621328        | 343.208830        | 172.108053        |                   |                   |  |  | 3  |
| 10 | <b>988.530950</b> | 494.769113        | 971.504401 | 486.255838 | 970.520385        | 485.763830 | K | 303.213915         | 152.110596        | 286.187366        | 143.597321        |                   |                   |  |  | 2  |
| 11 |                   |                   |            |            |                   |            | R | <b>175.118952</b>  | 88.063114         | 158.092403        | 79.549840         |                   |                   |  |  | 1  |

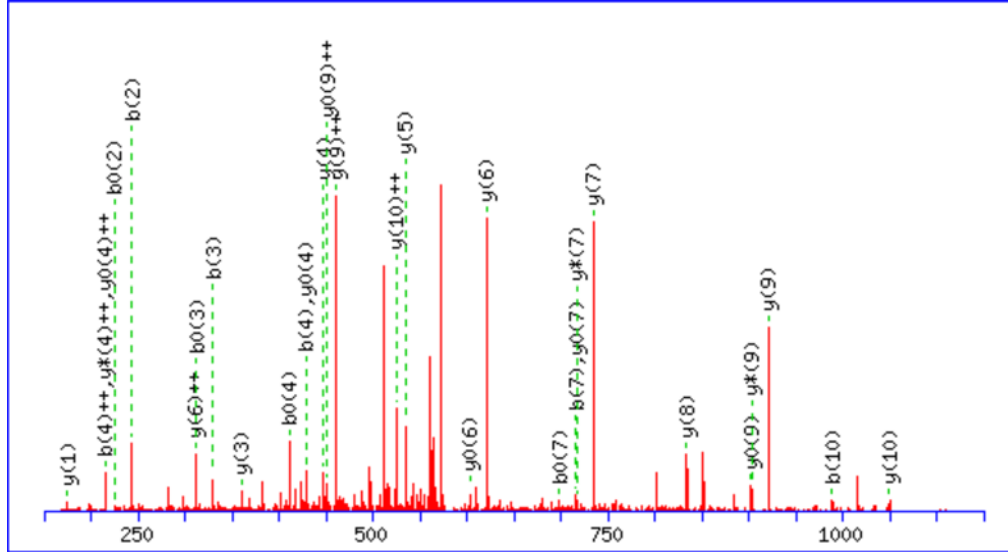

## Peptide View

MS/MS Fragmentation of **VGCPVGDAAAR**

Found in **IP100099670**, Tax\_Id=9606 Gene\_Symbol=CEL carboxyl ester lipase precursor

Experiment: 09 - S\_C-3 Fraction: S\_C-3

Match to Query 3103: 1000.475448 from(501.245000,2+)

Title: OECHL100317\_13.3671.3671.2.dta

Data file \\Boromir\masse\Data LTQ-Orbitrap\Chrystelle Lacroix\Etude clinique sJPU\OECHL100317\_13.raw

**Monoisotopic mass of neutral peptide Mr(calc):** 1000.476028**Fixed modifications:** Carbamidomethyl (C) (apply to specified residues or termini only)**Ions Score:** 49**Expect:** 0.00071**Matches :** 22/72 fragment ions using 54 most intense peaks ([help](#))

| #  | b          | b <sup>++</sup> | b <sup>0</sup> | b <sup>0++</sup> | Seq. | y          | y <sup>++</sup> | y*         | y* <sup>++</sup> | y <sup>0</sup> | y <sup>0++</sup> | #  |
|----|------------|-----------------|----------------|------------------|------|------------|-----------------|------------|------------------|----------------|------------------|----|
| 1  | 100.075690 | 50.541483       |                |                  | V    |            |                 |            |                  |                |                  | 10 |
| 2  | 157.097154 | 79.052215       |                |                  | G    | 902.414878 | 451.711077      | 885.388329 | 443.197803       | 884.404313     | 442.705795       | 9  |
| 3  | 317.127803 | 159.067540      |                |                  | C    | 845.393414 | 423.200345      | 828.366865 | 414.687071       | 827.382849     | 414.195063       | 8  |
| 4  | 414.180567 | 207.593922      |                |                  | P    | 685.362765 | 343.185021      | 668.336216 | 334.671746       | 667.352200     | 334.179738       | 7  |
| 5  | 513.248981 | 257.128129      |                |                  | V    | 588.310001 | 294.658639      | 571.283452 | 286.145364       | 570.299436     | 285.653356       | 6  |
| 6  | 570.270445 | 285.638861      |                |                  | G    | 489.241587 | 245.124431      | 472.215038 | 236.611157       | 471.231022     | 236.119149       | 5  |
| 7  | 685.297388 | 343.152332      | 667.286823     | 334.147050       | D    | 432.220123 | 216.613699      | 415.193574 | 208.100425       | 414.209558     | 207.608417       | 4  |
| 8  | 756.334502 | 378.670889      | 738.323937     | 369.665607       | A    | 317.193180 | 159.100228      | 300.166631 | 150.586953       |                |                  | 3  |
| 9  | 827.371616 | 414.189446      | 809.361051     | 405.184164       | A    | 246.156066 | 123.581671      | 229.129517 | 115.068397       |                |                  | 2  |
| 10 |            |                 |                |                  | R    | 175.118952 | 88.063114       | 158.092403 | 79.549840        |                |                  | 1  |

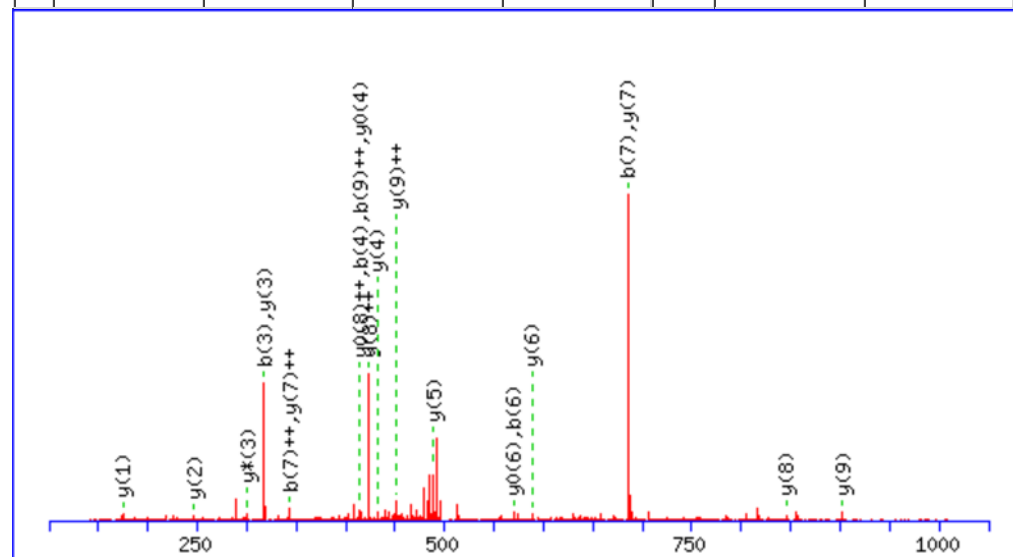

## Peptide View

MS/MS Fragmentation of **CQCPAGAALQADGR**Found in **IPI00010737**, Tax\_Id=9606 Gene\_Symbol=THBD Thrombomodulin

Experiment: 09 - S\_C-3 Fraction: S\_C-3

Match to Query 9476: 1473.646048 from(737.830300,2+)

Title: OECHL100317\_13.6994.6994.2.dta

Data file \\Boromir\masse\Data LTQ-Orbitrap\Chrystelle Lacroix\Etude clinique sJPU\OECHL100317\_13.raw

Monoisotopic mass of neutral peptide Mr(calc): 1473.645279 Fixed modifications: Carbamidomethyl (C) (apply to specified residues or termini only) Ions Score: 57

Expect: 9.4e-005 Matches : 36/128 fragment ions using 78 most intense peaks ([help](#))

| #  | b                  | b <sup>++</sup>   | b*                 | b <sup>*++</sup>  | b <sup>0</sup> | b <sup>0++</sup> | Seq. | y                  | y <sup>++</sup>   | y*                 | y <sup>*++</sup> | y <sup>0</sup>    | y <sup>0++</sup> | #  |
|----|--------------------|-------------------|--------------------|-------------------|----------------|------------------|------|--------------------|-------------------|--------------------|------------------|-------------------|------------------|----|
| 1  | 161.037925         | 81.022600         |                    |                   |                |                  | C    |                    |                   |                    |                  |                   |                  | 14 |
| 2  | <b>289.096503</b>  | 145.051890        | <b>272.069954</b>  | 136.538615        |                |                  | Q    | 1314.621912        | 657.814594        | 1297.595363        | 649.301320       | 1296.611347       | 648.809312       | 13 |
| 3  | <b>449.127152</b>  | 225.067214        | <b>432.100603</b>  | 216.553940        |                |                  | C    | <b>1186.563334</b> | <b>593.785305</b> | <b>1169.536785</b> | 585.272031       | 1168.552769       | 584.780023       | 12 |
| 4  | <b>546.179916</b>  | 273.593596        | <b>529.153367</b>  | 265.080322        |                |                  | P    | <b>1026.532685</b> | 513.769981        | 1009.506136        | 505.256706       | 1008.522120       | 504.764698       | 11 |
| 5  | <b>617.217030</b>  | 309.112153        | 600.190481         | 300.598879        |                |                  | A    | <b>929.479921</b>  | 465.243599        | <b>912.453372</b>  | 456.730324       | <b>911.469356</b> | 456.238316       | 10 |
| 6  | <b>674.238494</b>  | 337.622885        | 657.211945         | 329.109611        |                |                  | G    | <b>858.442807</b>  | 429.725042        | 841.416258         | 421.211767       | 840.432242        | 420.719759       | 9  |
| 7  | 745.275608         | 373.141442        | <b>728.249059</b>  | 364.628168        |                |                  | A    | <b>801.421343</b>  | 401.214310        | 784.394794         | 392.701035       | 783.410778        | 392.209027       | 8  |
| 8  | <b>816.312722</b>  | 408.659999        | 799.286173         | 400.146725        |                |                  | A    | <b>730.384229</b>  | 365.695753        | 713.357680         | 357.182478       | 712.373664        | 356.690470       | 7  |
| 9  | <b>929.396786</b>  | 465.202031        | <b>912.370237</b>  | 456.688757        |                |                  | L    | <b>659.347115</b>  | 330.177196        | 642.320566         | 321.663921       | 641.336550        | 321.171913       | 6  |
| 10 | <b>1057.455364</b> | <b>529.231320</b> | 1040.428815        | 520.718046        |                |                  | Q    | <b>546.263051</b>  | 273.635164        | <b>529.236502</b>  | 265.121889       | 528.252486        | 264.629881       | 5  |
| 11 | <b>1128.492478</b> | 564.749877        | <b>1111.465929</b> | <b>556.236603</b> |                |                  | A    | <b>418.204473</b>  | 209.605874        | 401.177924         | 201.092600       | 400.193908        | 200.600592       | 4  |
| 12 | <b>1243.519421</b> | 622.263349        | <b>1226.492872</b> | 613.750074        | 1225.508856    | 613.258066       | D    | <b>347.167359</b>  | 174.087317        | 330.140810         | 165.574043       | 329.156794        | 165.082035       | 3  |
| 13 | <b>1300.540885</b> | 650.774081        | 1283.514336        | 642.260806        | 1282.530320    | 641.768798       | G    | <b>232.140416</b>  | 116.573846        | 215.113867         | 108.060571       |                   |                  | 2  |
| 14 |                    |                   |                    |                   |                |                  | R    | 175.118952         | 88.063114         | 158.092403         | 79.549839        |                   |                  | 1  |

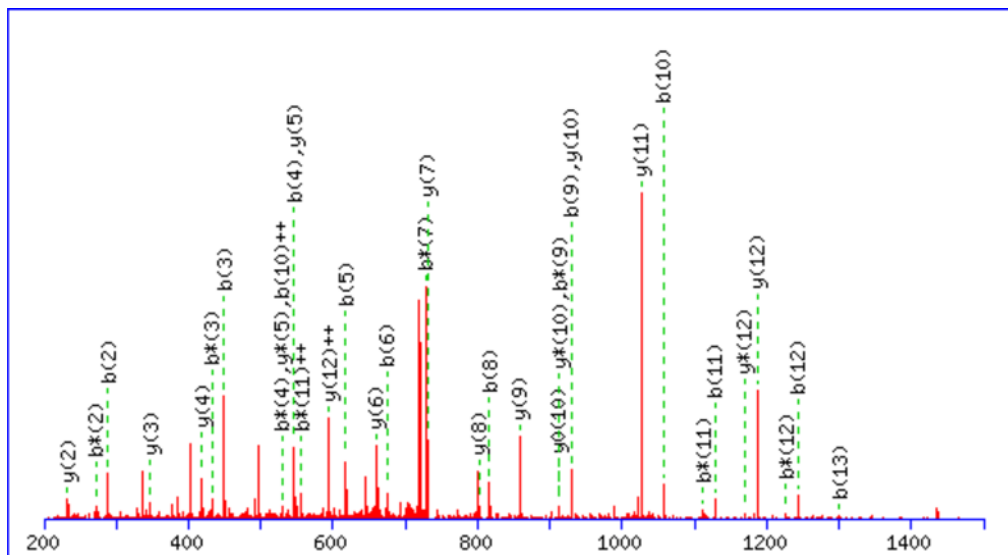

## Peptide View

MS/MS Fragmentation of **GLAEAAGPR**

Found in **IPI00290826**, Tax\_Id=9606 Gene\_Symbol=FAM174A Membrane protein FAM174A

**Experiment:** 09 - S\_C-3 **Fraction:** S\_C-3

Match to Query 1336: 840.445448 from(421.230000,2+)

Title: OECHL100317\_13.4166.4166.2.dta

Data file \\Boromir\masse\Data LTQ-Orbitrap\Chrystelle Lacroix\Etude clinique sJPU\OECHL100317\_13.raw

**Monoisotopic mass of neutral peptide Mr(calc):** 840.445343 **Fixed modifications:** Carbamidomethyl (C) (apply to specified residues or termini only) **Ions Score:** 54

**Expect:** 0.00028 **Matches :** 13/64 fragment ions using 21 most intense peaks ([help](#))

| # | b                 | b <sup>++</sup> | b <sup>0</sup> | b <sup>0++</sup> | Seq. | y                 | y <sup>++</sup>   | y <sup>*</sup> | y <sup>*++</sup> | y <sup>0</sup> | y <sup>0++</sup> | # |
|---|-------------------|-----------------|----------------|------------------|------|-------------------|-------------------|----------------|------------------|----------------|------------------|---|
| 1 | 58.028740         | 29.518008       |                |                  | G    |                   |                   |                |                  |                |                  | 9 |
| 2 | <b>171.112804</b> | 86.060040       |                |                  | L    | 784.431179        | 392.719228        | 767.404630     | 384.205953       | 766.420614     | 383.713945       | 8 |
| 3 | <b>242.149918</b> | 121.578597      |                |                  | A    | <b>671.347115</b> | <b>336.177196</b> | 654.320566     | 327.663921       | 653.336550     | 327.171913       | 7 |
| 4 | 371.192511        | 186.099894      | 353.181946     | 177.094611       | E    | <b>600.310001</b> | 300.658639        | 583.283452     | 292.145364       | 582.299436     | 291.653356       | 6 |
| 5 | <b>442.229625</b> | 221.618450      | 424.219060     | 212.613168       | A    | <b>471.267408</b> | 236.137342        | 454.240859     | 227.624067       |                |                  | 5 |
| 6 | <b>513.266739</b> | 257.137008      | 495.256174     | 248.131725       | A    | <b>400.230294</b> | 200.618785        | 383.203745     | 192.105510       |                |                  | 4 |

|   |                   |            |            |            |   |                   |            |            |            |  |  |   |
|---|-------------------|------------|------------|------------|---|-------------------|------------|------------|------------|--|--|---|
| 7 | <b>570.288203</b> | 285.647740 | 552.277638 | 276.642457 | G | <b>329.193180</b> | 165.100228 | 312.166631 | 156.586953 |  |  | 3 |
| 8 | 667.340967        | 334.174122 | 649.330402 | 325.168839 | P | <b>272.171716</b> | 136.589496 | 255.145167 | 128.076221 |  |  | 2 |
| 9 |                   |            |            |            | R | <b>175.118952</b> | 88.063114  | 158.092403 | 79.549839  |  |  | 1 |

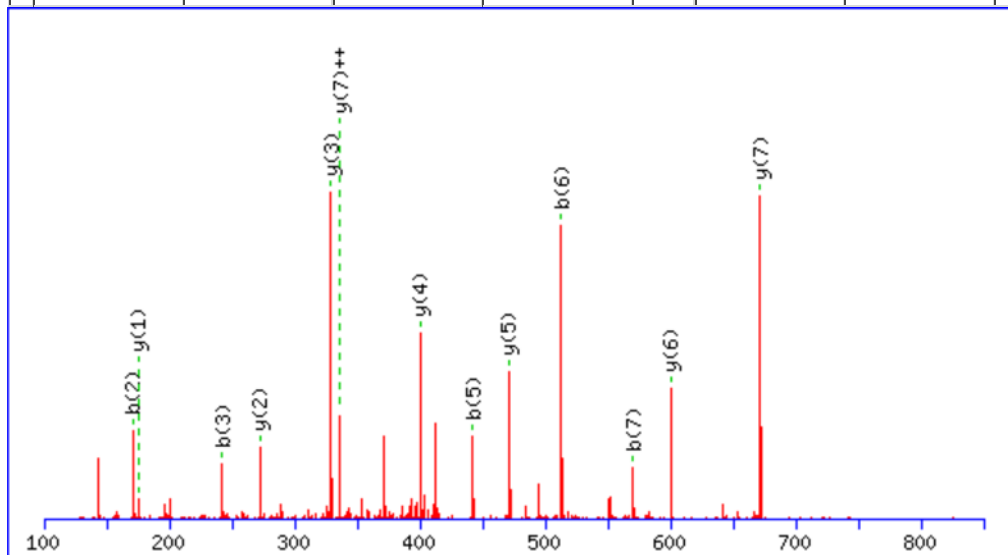

## Peptide View

MS/MS Fragmentation of **DFSLTSSSQTPGATK**

Found in **IP100291300**, Tax\_Id=9606 Gene\_Symbol=PODXL2 Putative uncharacterized protein PODXL2

**Experiment:** 33 - OPA-3 **Fraction:** OPA-3

Match to Query 10998: 1525.726448 from(763.870500,2+)

Title: OECHL100317\_11.11317.11317.2.dta

Data file \\Boromir\masse\Data LTQ-Orbitrap\Chrystelle Lacroix\Etude clinique sJPU\OECHL100317\_11.raw

**Monoisotopic mass of neutral peptide Mr(calc):** 1525.726028 **Fixed modifications:** Carbamidomethyl (C) (apply to specified residues or termini only) **Ions Score:** 92

**Expect:** 7.6e-008 **Matches :** 27/150 fragment ions using 37 most intense peaks ([help](#))

| # | b                 | b <sup>++</sup> | b* | b <sup>*++</sup> | b <sup>0</sup>    | b <sup>0++</sup> | Seq. | y                  | y <sup>++</sup>   | y*          | y <sup>*++</sup> | y <sup>0</sup> | y <sup>0++</sup> | #  |
|---|-------------------|-----------------|----|------------------|-------------------|------------------|------|--------------------|-------------------|-------------|------------------|----------------|------------------|----|
| 1 | 116.034219        | 58.520748       |    |                  | 98.023654         | 49.515465        | D    |                    |                   |             |                  |                |                  | 15 |
| 2 | <b>263.102633</b> | 132.054954      |    |                  | 245.092068        | 123.049672       | F    | 1411.706351        | 706.356813        | 1394.679802 | 697.843539       | 1393.695786    | 697.351531       | 14 |
| 3 | <b>350.134661</b> | 175.570968      |    |                  | <b>332.124096</b> | 166.565686       | S    | <b>1264.637937</b> | <b>632.822607</b> | 1247.611388 | 624.309332       | 1246.627372    | 623.817324       | 13 |

|    |             |            |             |            |             |            |   |             |            |             |            |             |            |    |
|----|-------------|------------|-------------|------------|-------------|------------|---|-------------|------------|-------------|------------|-------------|------------|----|
| 4  | 463.218725  | 232.113001 |             |            | 445.208160  | 223.107718 | L | 1177.605909 | 589.306592 | 1160.579360 | 580.793318 | 1159.595344 | 580.301310 | 12 |
| 5  | 564.266404  | 282.636840 |             |            | 546.255839  | 273.631558 | T | 1064.521845 | 532.764561 | 1047.495296 | 524.251286 | 1046.511280 | 523.759278 | 11 |
| 6  | 651.298432  | 326.152854 |             |            | 633.287867  | 317.147572 | S | 963.474166  | 482.240721 | 946.447617  | 473.727446 | 945.463601  | 473.235438 | 10 |
| 7  | 738.330460  | 369.668868 |             |            | 720.319895  | 360.663586 | S | 876.442138  | 438.724707 | 859.415589  | 430.211432 | 858.431573  | 429.719424 | 9  |
| 8  | 825.362488  | 413.184882 |             |            | 807.351923  | 404.179599 | S | 789.410110  | 395.208693 | 772.383561  | 386.695418 | 771.399545  | 386.203410 | 8  |
| 9  | 953.421066  | 477.214171 | 936.394517  | 468.700897 | 935.410501  | 468.208889 | Q | 702.378082  | 351.692679 | 685.351533  | 343.179404 | 684.367517  | 342.687396 | 7  |
| 10 | 1054.468745 | 527.738010 | 1037.442196 | 519.224736 | 1036.458180 | 518.732728 | T | 574.319504  | 287.663390 | 557.292955  | 279.150115 | 556.308939  | 278.658107 | 6  |
| 11 | 1151.521509 | 576.264392 | 1134.494960 | 567.751118 | 1133.510944 | 567.259110 | P | 473.271825  | 237.139550 | 456.245276  | 228.626276 | 455.261260  | 228.134268 | 5  |
| 12 | 1208.542973 | 604.775124 | 1191.516424 | 596.261850 | 1190.532408 | 595.769842 | G | 376.219061  | 188.613168 | 359.192512  | 180.099894 | 358.208496  | 179.607886 | 4  |
| 13 | 1279.580087 | 640.293681 | 1262.553538 | 631.780407 | 1261.569522 | 631.288399 | A | 319.197597  | 160.102436 | 302.171048  | 151.589162 | 301.187032  | 151.097154 | 3  |
| 14 | 1380.627766 | 690.817521 | 1363.601217 | 682.304246 | 1362.617201 | 681.812238 | T | 248.160483  | 124.583879 | 231.133934  | 116.070605 | 230.149918  | 115.578597 | 2  |
| 15 |             |            |             |            |             |            | K | 147.112804  | 74.060040  | 130.086255  | 65.546765  |             |            | 1  |

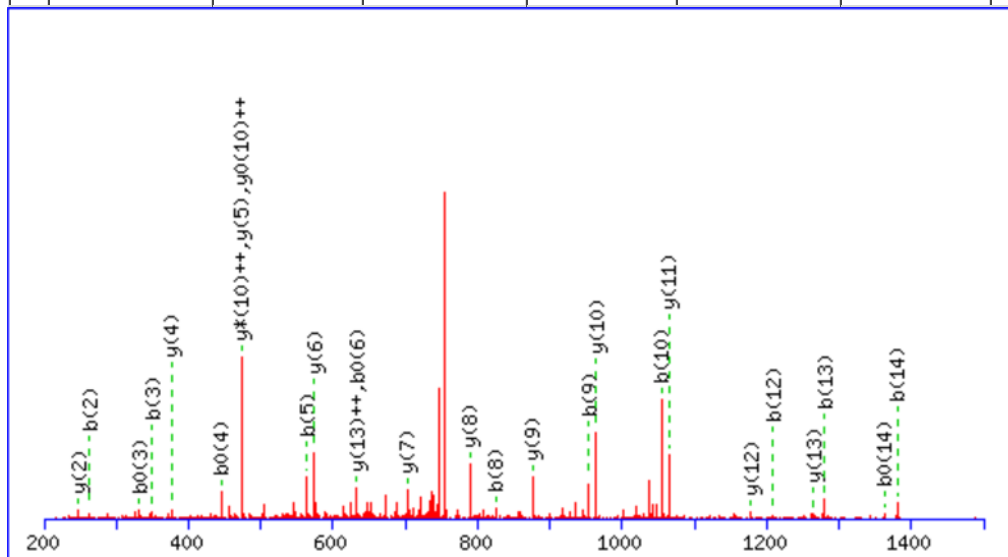

## Peptide View

MS/MS Fragmentation of **SFCDLTDEWR**

Found in **IP100010193**, Tax\_Id=9606 Gene\_Symbol=IFNAR2 Isoform 1 of Interferon-alpha/beta receptor beta chain

Experiment: 33 - OPA-3 Fraction: OPA-3

Match to Query 8986: 1327.550848 from(664.782700,2+)

Title: OECHL100317\_11.17385.17385.2.dta

Data file \\Boromir\masse\Data LTQ-Orbitrap\Chrystelle Lacroix\Etude clinique sJPU\OECHL100317\_11.raw

**Monoisotopic mass of neutral peptide Mr(calc):** 1327.550308**Fixed modifications:** Carbamidomethyl (C) (apply to specified residues or termini only)**Ions Score:** 58**Expect:** 3.6e-005**Matches :** 11/86 fragment ions using 11 most intense peaks ([help](#))

| #  | b           | b <sup>++</sup> | b <sup>0</sup> | b <sup>0++</sup> | Seq. | y           | y <sup>++</sup> | y*          | y <sup>*++</sup> | y <sup>0</sup> | y <sup>0++</sup> | #  |
|----|-------------|-----------------|----------------|------------------|------|-------------|-----------------|-------------|------------------|----------------|------------------|----|
| 1  | 88.039304   | 44.523290       | 70.028739      | 35.518008        | S    |             |                 |             |                  |                |                  | 10 |
| 2  | 235.107718  | 118.057497      | 217.097153     | 109.052214       | F    | 1241.525550 | 621.266413      | 1224.499001 | 612.753138       | 1223.514985    | 612.261130       | 9  |
| 3  | 395.138367  | 198.072821      | 377.127802     | 189.067539       | C    | 1094.457136 | 547.732206      | 1077.430587 | 539.218932       | 1076.446571    | 538.726924       | 8  |
| 4  | 510.165310  | 255.586293      | 492.154745     | 246.581010       | D    | 934.426487  | 467.716882      | 917.399938  | 459.203607       | 916.415922     | 458.711599       | 7  |
| 5  | 623.249374  | 312.128325      | 605.238809     | 303.123043       | L    | 819.399544  | 410.203410      | 802.372995  | 401.690135       | 801.388979     | 401.198127       | 6  |
| 6  | 724.297053  | 362.652165      | 706.286488     | 353.646882       | T    | 706.315480  | 353.661378      | 689.288931  | 345.148103       | 688.304915     | 344.656095       | 5  |
| 7  | 839.323996  | 420.165636      | 821.313431     | 411.160353       | D    | 605.267801  | 303.137539      | 588.241252  | 294.624264       | 587.257236     | 294.132256       | 4  |
| 8  | 968.366589  | 484.686933      | 950.356024     | 475.681650       | E    | 490.240858  | 245.624067      | 473.214309  | 237.110792       | 472.230293     | 236.618784       | 3  |
| 9  | 1154.445902 | 577.726589      | 1136.435337    | 568.721306       | W    | 361.198265  | 181.102770      | 344.171716  | 172.589496       |                |                  | 2  |
| 10 |             |                 |                |                  | R    | 175.118952  | 88.063114       | 158.092403  | 79.549839        |                |                  | 1  |

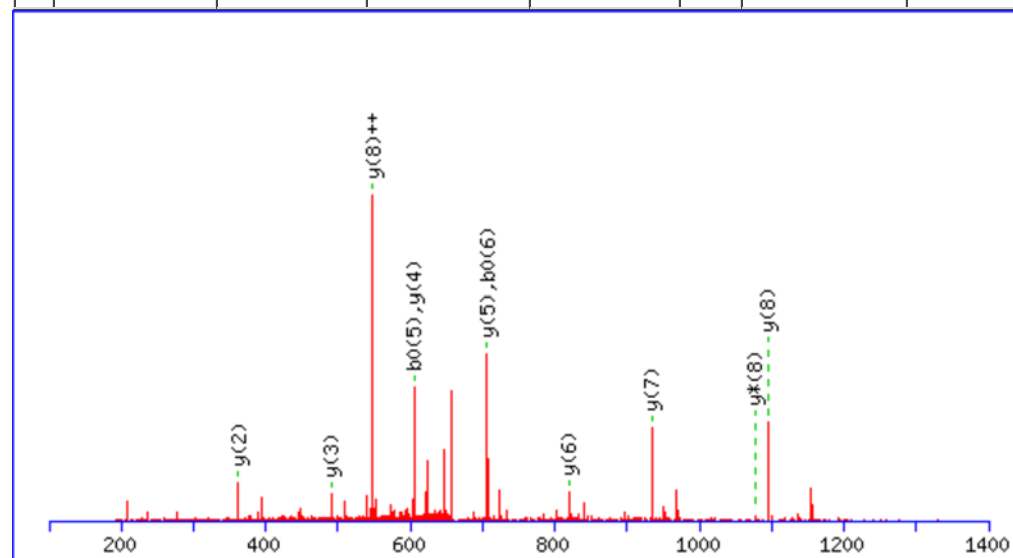

## Peptide View

MS/MS Fragmentation of **EVQLVESGGGLVKGSLR**Found in **IPI00783024**, Tax\_Id=9606 Gene\_Symbol=- Myosin-reactive immunoglobulin heavy chain variable region (Fragment)**Experiment:** 33 - OPA-3 **Fraction:** OPA-3

Match to Query 14304: 1881.031248 from(941.522900,2+)

Title: OECHL100317\_11.14136.14136.2.dta

Data file \\Boromir\masse\Data LTQ-Orbitrap\Chrystelle Lacroix\Etude clinique sJPU\OECHL100317\_11.raw

**Monoisotopic mass of neutral peptide Mr(calc):** 1881.031982**Fixed modifications:** Carbamidomethyl (C) (apply to specified residues or termini only)**Ions Score:** 66**Expect:** 1.6e-005**Matches :** 50/208 fragment ions using 93 most intense peaks ([help](#))

| #  | b                  | b <sup>++</sup> | b*                 | b* <sup>++</sup>  | b <sup>0</sup>     | b <sup>0++</sup>  | Seq. | y                  | y <sup>++</sup>   | y*                 | y* <sup>++</sup>  | y <sup>0</sup>     | y <sup>0++</sup>  | #  |
|----|--------------------|-----------------|--------------------|-------------------|--------------------|-------------------|------|--------------------|-------------------|--------------------|-------------------|--------------------|-------------------|----|
| 1  | 130.049869         | 65.528572       |                    |                   | 112.039304         | 56.523290         | E    |                    |                   |                    |                   |                    |                   | 19 |
| 2  | 229.118283         | 115.062780      |                    |                   | 211.107718         | 106.057497        | V    | 1752.996660        | 877.001968        | 1735.970111        | 868.488694        | 1734.986095        | 867.996686        | 18 |
| 3  | <b>357.176861</b>  | 179.092069      | <b>340.150312</b>  | 170.578794        | <b>339.166296</b>  | 170.086786        | Q    | <b>1653.928246</b> | <b>827.467761</b> | 1636.901697        | <b>818.954487</b> | 1635.917681        | <b>818.462479</b> | 17 |
| 4  | <b>470.260925</b>  | 235.634101      | <b>453.234376</b>  | 227.120826        | <b>452.250360</b>  | 226.628818        | L    | <b>1525.869668</b> | <b>763.438472</b> | 1508.843119        | 754.925198        | 1507.859103        | 754.433190        | 16 |
| 5  | <b>569.329339</b>  | 285.168308      | 552.302790         | 276.655033        | <b>551.318774</b>  | 276.163025        | V    | <b>1412.785604</b> | <b>706.896440</b> | <b>1395.759055</b> | 698.383166        | <b>1394.775039</b> | 697.891158        | 15 |
| 6  | 698.371932         | 349.689604      | 681.345383         | 341.176330        | 680.361367         | <b>340.684322</b> | E    | <b>1313.717190</b> | <b>657.362233</b> | <b>1296.690641</b> | 648.848959        | <b>1295.706625</b> | 648.356951        | 14 |
| 7  | 785.403960         | 393.205618      | 768.377411         | 384.692344        | 767.393395         | 384.200336        | S    | <b>1184.674597</b> | 592.840937        | 1167.648048        | 584.327662        | 1166.664032        | 583.835654        | 13 |
| 8  | 842.425424         | 421.716350      | 825.398875         | 413.203076        | 824.414859         | 412.711068        | G    | <b>1097.642569</b> | 549.324923        | 1080.616020        | 540.811648        | 1079.632004        | 540.319640        | 12 |
| 9  | 899.446888         | 450.227082      | 882.420339         | 441.713808        | 881.436323         | 441.221800        | G    | <b>1040.621105</b> | 520.814191        | 1023.594556        | 512.300916        | 1022.610540        | 511.808908        | 11 |
| 10 | 956.468352         | 478.737814      | 939.441803         | <b>470.224540</b> | 938.457787         | 469.732532        | G    | <b>983.599641</b>  | 492.303459        | 966.573092         | 483.790184        | 965.589076         | 483.298176        | 10 |
| 11 | <b>1069.552416</b> | 535.279846      | <b>1052.525867</b> | 526.766572        | <b>1051.541851</b> | 526.274564        | L    | <b>926.578177</b>  | 463.792727        | 909.551628         | 455.279452        | 908.567612         | <b>454.787444</b> | 9  |
| 12 | <b>1168.620830</b> | 584.814053      | 1151.594281        | 576.300779        | <b>1150.610265</b> | 575.808771        | V    | <b>813.494113</b>  | 407.250695        | 796.467564         | 398.737420        | 795.483548         | 398.245412        | 8  |
| 13 | <b>1296.715793</b> | 648.861535      | 1279.689244        | 640.348260        | <b>1278.705228</b> | 639.856252        | K    | <b>714.425699</b>  | <b>357.716487</b> | 697.399150         | 349.203213        | 696.415134         | 348.711205        | 7  |
| 14 | 1393.768557        | 697.387917      | 1376.742008        | 688.874642        | 1375.757992        | 688.382634        | P    | <b>586.330736</b>  | 293.669006        | <b>569.304187</b>  | 285.155731        | <b>568.320171</b>  | 284.663723        | 6  |
| 15 | 1450.790021        | 725.898649      | 1433.763472        | 717.385374        | 1432.779456        | 716.893366        | G    | <b>489.277972</b>  | 245.142624        | 472.251423         | 236.629349        | <b>471.267407</b>  | 236.137341        | 5  |
| 16 | 1507.811485        | 754.409381      | 1490.784936        | 745.896106        | <b>1489.800920</b> | 745.404098        | G    | 432.256508         | 216.631892        | 415.229959         | 208.118617        | 414.245943         | 207.626609        | 4  |
| 17 | 1594.843513        | 797.925395      | 1577.816964        | 789.412120        | 1576.832948        | 788.920112        | S    | 375.235044         | 188.121160        | 358.208495         | 179.607885        | <b>357.224479</b>  | 179.115877        | 3  |
| 18 | <b>1707.927577</b> | 854.467427      | 1690.901028        | 845.954152        | <b>1689.917012</b> | 845.462144        | L    | 288.203016         | 144.605146        | 271.176467         | 136.091871        |                    |                   | 2  |
| 19 |                    |                 |                    |                   |                    |                   | R    | 175.118952         | 88.063114         | 158.092403         | 79.549839         |                    |                   | 1  |



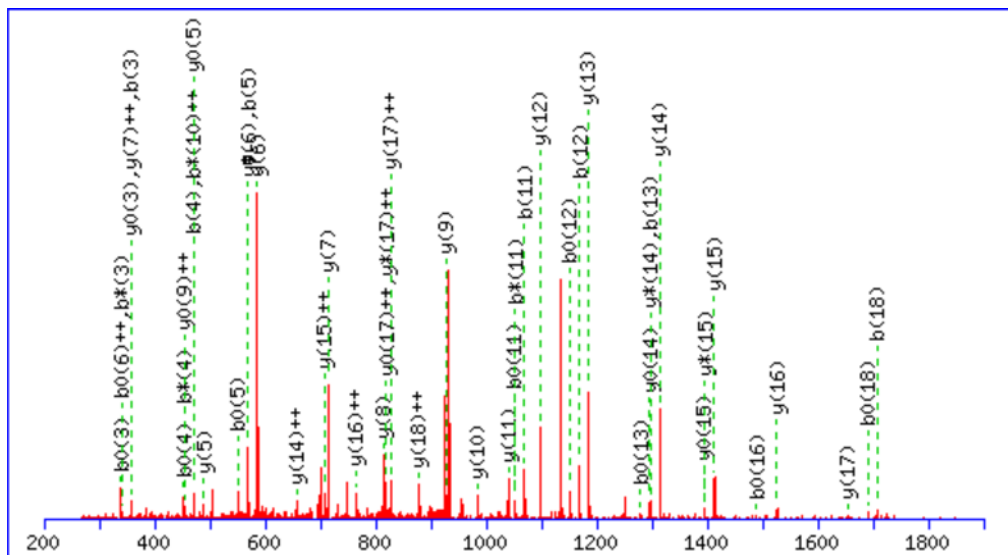

## Peptide View

MS/MS Fragmentation of **YCCAAADAR**

Found in **IPI00455600**, Tax\_Id=9606 Gene\_Symbol=SHISA3 Protein shisa-3 homolog

**Experiment:** 33 - OPA-3 **Fraction:** OPA-3

Match to Query 4752: 1056.413048 from(529.213800,2+)

Title: OECHL100317\_11.3574.3574.2.dta

Data file \\Boromir\masse\Data LTQ-Orbitrap\Chrystelle Lacroix\Etude clinique sJPU\OECHL100317\_11.raw

**Monoisotopic mass of neutral peptide Mr(calc):** 1056.411682 **Fixed modifications:** Carbamidomethyl (C) (apply to specified residues or termini only) **Ions Score:** 61

**Expect:** 5e-006 **Matches :** 15/64 fragment ions using 27 most intense peaks ([help](#))

| # | b                 | b <sup>++</sup> | b <sup>0</sup> | b <sup>0++</sup> | Seq. | y                 | y <sup>++</sup>   | y*         | y <sup>*++</sup> | y <sup>0</sup> | y <sup>0++</sup> | # |
|---|-------------------|-----------------|----------------|------------------|------|-------------------|-------------------|------------|------------------|----------------|------------------|---|
| 1 | 164.070605        | 82.538940       |                |                  | Y    |                   |                   |            |                  |                |                  | 9 |
| 2 | <b>324.101254</b> | 162.554265      |                |                  | C    | <b>894.355649</b> | <b>447.681462</b> | 877.329100 | 439.168188       | 876.345084     | 438.676180       | 8 |
| 3 | <b>484.131903</b> | 242.569590      |                |                  | C    | <b>734.325000</b> | 367.666138        | 717.298451 | 359.152863       | 716.314435     | 358.660855       | 7 |
| 4 | <b>555.169017</b> | 278.088147      |                |                  | A    | <b>574.294351</b> | 287.650813        | 557.267802 | 279.137539       | 556.283786     | 278.645531       | 6 |
| 5 | <b>626.206131</b> | 313.606704      |                |                  | A    | <b>503.257237</b> | 252.132256        | 486.230688 | 243.618982       | 485.246672     | 243.126974       | 5 |
| 6 | 697.243245        | 349.125261      |                |                  | A    | <b>432.220123</b> | 216.613699        | 415.193574 | 208.100425       | 414.209558     | 207.608417       | 4 |

|   |                   |            |            |            |          |                   |                   |            |            |            |            |          |
|---|-------------------|------------|------------|------------|----------|-------------------|-------------------|------------|------------|------------|------------|----------|
| 7 | <b>812.270188</b> | 406.638732 | 794.259623 | 397.633449 | <b>D</b> | <b>361.183009</b> | <b>181.095142</b> | 344.156460 | 172.581868 | 343.172444 | 172.089860 | <b>3</b> |
| 8 | 883.307302        | 442.157289 | 865.296737 | 433.152006 | <b>A</b> | <b>246.156066</b> | 123.581671        | 229.129517 | 115.068396 |            |            | <b>2</b> |
| 9 |                   |            |            |            | <b>R</b> | <b>175.118952</b> | 88.063114         | 158.092403 | 79.549839  |            |            | <b>1</b> |

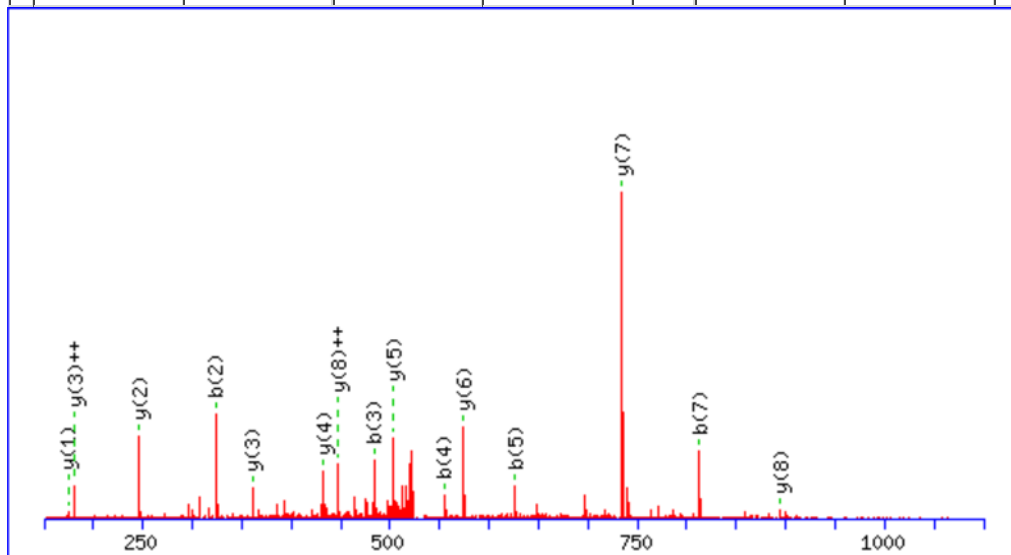

## Peptide View

MS/MS Fragmentation of **LLIYDASNLETGVPSR**

Found in **IPI00003111**, Tax\_Id=9606 Gene\_Symbol=LOC652694 Ig kappa chain V-I region AU

**Experiment:** 33 - OPA-3 **Fraction:** OPA-3

Match to Query 13240: 1746.915648 from(874.465100,2+)

Title: OECHL100317\_11.17504.17504.2.dta

Data file \\Boromir\masse\Data LTQ-Orbitrap\Chrystelle Lacroix\Etude clinique sJPU\OECHL100317\_11.raw

**Monoisotopic mass of neutral peptide Mr(calc):** 1746.915192**Fixed modifications:** Carbamidomethyl (C) (apply to specified residues or termini only)**Ions Score:** 84

**Expect:** 4e-007**Matches :** 28/156 fragment ions using 42 most intense peaks ([help](#))

| #        | <b>b</b>   | <b>b<sup>++</sup></b> | <b>b*</b> | <b>b<sup>*++</sup></b> | <b>b<sup>0</sup></b> | <b>b<sup>0++</sup></b> | Seq.     | <b>y</b>           | <b>y<sup>++</sup></b> | <b>y*</b>   | <b>y<sup>*++</sup></b> | <b>y<sup>0</sup></b> | <b>y<sup>0++</sup></b> | #         |
|----------|------------|-----------------------|-----------|------------------------|----------------------|------------------------|----------|--------------------|-----------------------|-------------|------------------------|----------------------|------------------------|-----------|
| <b>1</b> | 114.091340 | 57.549308             |           |                        |                      |                        | <b>L</b> |                    |                       |             |                        |                      |                        | <b>16</b> |
| <b>2</b> | 227.175404 | 114.091340            |           |                        |                      |                        | <b>L</b> | 1634.838427        | 817.922852            | 1617.811878 | 809.409577             | 1616.827862          | 808.917569             | <b>15</b> |
| <b>3</b> | 340.259468 | 170.633372            |           |                        |                      |                        | <b>I</b> | <b>1521.754363</b> | 761.380820            | 1504.727814 | <b>752.867545</b>      | 1503.743798          | <b>752.375537</b>      | <b>14</b> |

|    |                    |                   |                    |            |                   |            |          |                    |            |             |            |                    |            |           |
|----|--------------------|-------------------|--------------------|------------|-------------------|------------|----------|--------------------|------------|-------------|------------|--------------------|------------|-----------|
| 4  | <b>503.322797</b>  | 252.165036        |                    |            |                   |            | <b>Y</b> | 1408.670299        | 704.838788 | 1391.643750 | 696.325513 | <b>1390.659734</b> | 695.833505 | <b>13</b> |
| 5  | 618.349740         | 309.678508        |                    |            | 600.339175        | 300.673226 | <b>D</b> | <b>1245.606970</b> | 623.307123 | 1228.580421 | 614.793849 | 1227.596405        | 614.301841 | <b>12</b> |
| 6  | 689.386854         | 345.197065        |                    |            | 671.376289        | 336.191782 | <b>A</b> | <b>1130.580027</b> | 565.793652 | 1113.553478 | 557.280377 | 1112.569462        | 556.788369 | <b>11</b> |
| 7  | 776.418882         | 388.713079        |                    |            | <b>758.408317</b> | 379.707796 | <b>S</b> | <b>1059.542913</b> | 530.275095 | 1042.516364 | 521.761820 | 1041.532348        | 521.269812 | <b>10</b> |
| 8  | <b>890.461809</b>  | 445.734542        | <b>873.435260</b>  | 437.221268 | 872.451244        | 436.729260 | <b>N</b> | <b>972.510885</b>  | 486.759081 | 955.484336  | 478.245806 | 954.500320         | 477.753798 | <b>9</b>  |
| 9  | <b>1003.545873</b> | 502.276574        | 986.519324         | 493.763300 | 985.535308        | 493.271292 | <b>L</b> | <b>858.467958</b>  | 429.737617 | 841.441409  | 421.224343 | 840.457393         | 420.732335 | <b>8</b>  |
| 10 | <b>1132.588466</b> | 566.797871        | 1115.561917        | 558.284597 | 1114.577901       | 557.792588 | <b>E</b> | <b>745.383894</b>  | 373.195585 | 728.357345  | 364.682311 | 727.373329         | 364.190303 | <b>7</b>  |
| 11 | <b>1233.636145</b> | <b>617.321710</b> | 1216.609596        | 608.808436 | 1215.625580       | 608.316428 | <b>T</b> | <b>616.341301</b>  | 308.674289 | 599.314752  | 300.161014 | 598.330736         | 299.669006 | <b>6</b>  |
| 12 | <b>1290.657609</b> | 645.832442        | 1273.631060        | 637.319168 | 1272.647044       | 636.827160 | <b>G</b> | <b>515.293622</b>  | 258.150449 | 498.267073  | 249.637175 | 497.283057         | 249.145167 | <b>5</b>  |
| 13 | <b>1389.726023</b> | 695.366649        | <b>1372.699474</b> | 686.853375 | 1371.715458       | 686.361367 | <b>V</b> | <b>458.272158</b>  | 229.639717 | 441.245609  | 221.126443 | 440.261593         | 220.634435 | <b>4</b>  |
| 14 | <b>1486.778787</b> | 743.893032        | 1469.752238        | 735.379757 | 1468.768222       | 734.887749 | <b>P</b> | <b>359.203744</b>  | 180.105510 | 342.177195  | 171.592236 | <b>341.193179</b>  | 171.100228 | <b>3</b>  |
| 15 | <b>1573.810815</b> | 787.409046        | 1556.784266        | 778.895771 | 1555.800250       | 778.403763 | <b>S</b> | 262.150980         | 131.579128 | 245.124431  | 123.065854 | 244.140415         | 122.573846 | <b>2</b>  |
| 16 |                    |                   |                    |            |                   |            | <b>R</b> | 175.118952         | 88.063114  | 158.092403  | 79.549839  |                    |            | <b>1</b>  |

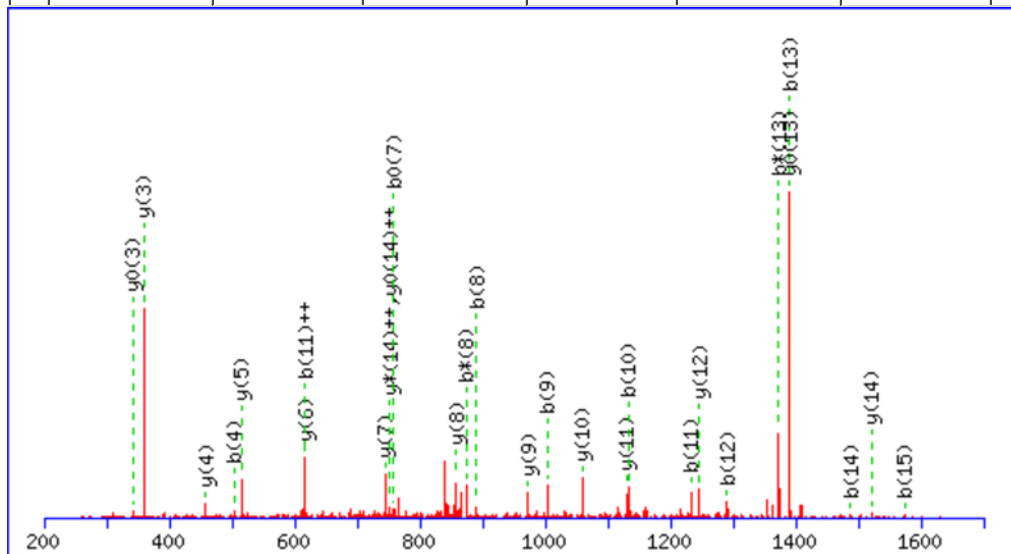

## Peptide View

MS/MS Fragmentation of **GLDTSLGAVQSDTGR**

Found in **IPI00289931**, Tax\_Id=9606 Gene\_Symbol=MADCAM1 MADCAM1 protein

Experiment: 33 - OPA-3 Fraction: OPA-3

Match to Query 10502: 1475.720848 from(738.867700,2+)

Title: OECHL100317\_11.11812.11812.2.dta

Data file \\Boromir\masse\Data LTQ-Orbitrap\Chrystelle Lacroix\Etude clinique sJPU\OECHL100317\_11.raw

**Monoisotopic mass of neutral peptide Mr(calc):** 1475.721619**Fixed modifications:** Carbamidomethyl (C) (apply to specified residues or termini only)**Ions Score:** 82

**Expect:** 9.2e-007**Matches :** 21/142 fragment ions using 24 most intense peaks ([help](#))

| #  | b                  | b <sup>++</sup> | b <sup>*</sup> | b <sup>*++</sup> | b <sup>0</sup>     | b <sup>0++</sup> | Seq. | y                  | y <sup>++</sup> | y <sup>*</sup> | y <sup>*++</sup>  | y <sup>0</sup> | y <sup>0++</sup>  | #  |
|----|--------------------|-----------------|----------------|------------------|--------------------|------------------|------|--------------------|-----------------|----------------|-------------------|----------------|-------------------|----|
| 1  | 58.028740          | 29.518008       |                |                  |                    |                  | G    |                    |                 |                |                   |                |                   | 15 |
| 2  | 171.112804         | 86.060040       |                |                  |                    |                  | L    | 1419.707414        | 710.357345      | 1402.680865    | 701.844071        | 1401.696849    | 701.352063        | 14 |
| 3  | <b>286.139747</b>  | 143.573512      |                |                  | 268.129182         | 134.568229       | D    | 1306.623350        | 653.815313      | 1289.596801    | 645.302039        | 1288.612785    | 644.810031        | 13 |
| 4  | <b>387.187426</b>  | 194.097351      |                |                  | 369.176861         | 185.092069       | T    | 1191.596407        | 596.301842      | 1174.569858    | <b>587.788567</b> | 1173.585842    | <b>587.296559</b> | 12 |
| 5  | <b>474.219454</b>  | 237.613365      |                |                  | 456.208889         | 228.608082       | S    | <b>1090.548728</b> | 545.778002      | 1073.522179    | 537.264728        | 1072.538163    | 536.772719        | 11 |
| 6  | <b>587.303518</b>  | 294.155397      |                |                  | 569.292953         | 285.150115       | L    | <b>1003.516700</b> | 502.261988      | 986.490151     | 493.748714        | 985.506135     | 493.256706        | 10 |
| 7  | 644.324982         | 322.666129      |                |                  | 626.314417         | 313.660847       | G    | <b>890.432636</b>  | 445.719956      | 873.406087     | 437.206682        | 872.422071     | 436.714674        | 9  |
| 8  | 715.362096         | 358.184686      |                |                  | <b>697.351531</b>  | 349.179404       | A    | 833.411172         | 417.209224      | 816.384623     | 408.695950        | 815.400607     | 408.203942        | 8  |
| 9  | 814.430510         | 407.718893      |                |                  | 796.419945         | 398.713611       | V    | <b>762.374058</b>  | 381.690667      | 745.347509     | 373.177393        | 744.363493     | 372.685385        | 7  |
| 10 | <b>942.489088</b>  | 471.748182      | 925.462539     | 463.234908       | 924.478523         | 462.742900       | Q    | <b>663.305644</b>  | 332.156460      | 646.279095     | 323.643186        | 645.295079     | 323.151178        | 6  |
| 11 | <b>1029.521116</b> | 515.264196      | 1012.494567    | 506.750922       | 1011.510551        | 506.258914       | S    | <b>535.247066</b>  | 268.127171      | 518.220517     | 259.613897        | 517.236501     | 259.121889        | 5  |
| 12 | <b>1144.548059</b> | 572.777668      | 1127.521510    | 564.264393       | 1126.537494        | 563.772385       | D    | <b>448.215038</b>  | 224.611157      | 431.188489     | 216.097882        | 430.204473     | 215.605874        | 4  |
| 13 | <b>1245.595738</b> | 623.301507      | 1228.569189    | 614.788233       | <b>1227.585173</b> | 614.296225       | T    | <b>333.188095</b>  | 167.097685      | 316.161546     | 158.584411        | 315.177530     | 158.092403        | 3  |
| 14 | 1302.617202        | 651.812239      | 1285.590653    | 643.298965       | 1284.606637        | 642.806957       | G    | <b>232.140416</b>  | 116.573846      | 215.113867     | 108.060571        |                |                   | 2  |
| 15 |                    |                 |                |                  |                    |                  | R    | 175.118952         | 88.063114       | 158.092403     | 79.549839         |                |                   | 1  |

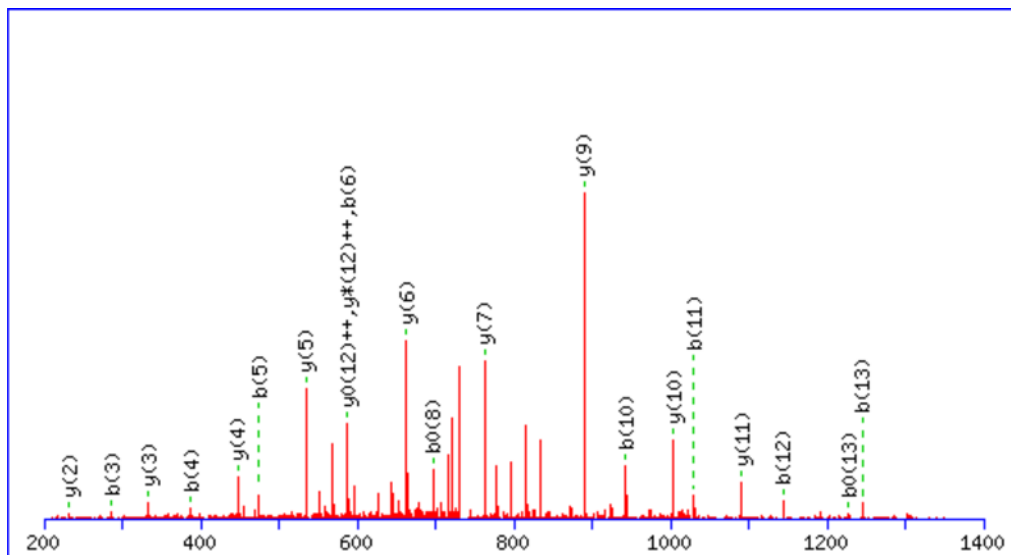

## Peptide View

MS/MS Fragmentation of **SDAAVDTSEITTK**

Found in **IPI00412977**, Tax\_Id=9606 Gene\_Symbol=- Prothymosin alpha

**Experiment:** 33 - OPA-3 **Fraction:** OPA-3

Match to Query 10388: 1465.678048 from(733.846300,2+)

Title: OECHL100317\_11.10246.10246.2.dta

Data file \\Boromir\masse\Data LTQ-Orbitrap\Chrystelle Lacroix\Etude clinique sJPU\OECHL100317\_11.raw

**Monoisotopic mass of neutral peptide Mr(calc):** 1465.678391 **Fixed modifications:** Carbamidomethyl (C) (apply to specified residues or termini only) **Variable modifications:** N-term : Acetyl (N-term) **Ions Score:** 49 **Expect:** 0.001 **Matches :** 32/128 fragment ions using 84 most intense peaks ([help](#))

| # | b          | b <sup>++</sup> | b <sup>0</sup> | b <sup>0++</sup> | Seq. | y           | y <sup>++</sup> | y <sup>*</sup> | y <sup>*++</sup> | y <sup>0</sup> | y <sup>0++</sup> | #  |
|---|------------|-----------------|----------------|------------------|------|-------------|-----------------|----------------|------------------|----------------|------------------|----|
| 1 | 130.049869 | 65.528572       | 112.039304     | 56.523290        | S    |             |                 |                |                  |                |                  | 14 |
| 2 | 245.076812 | 123.042044      | 227.066247     | 114.036761       | D    | 1337.643082 | 669.325179      | 1320.616533    | 660.811905       | 1319.632517    | 660.319897       | 13 |
| 3 | 316.113926 | 158.560601      | 298.103361     | 149.555319       | A    | 1222.616139 | 611.811708      | 1205.589590    | 603.298433       | 1204.605574    | 602.806425       | 12 |
| 4 | 387.151040 | 194.079158      | 369.140475     | 185.073875       | A    | 1151.579025 | 576.293151      | 1134.552476    | 567.779876       | 1133.568460    | 567.287868       | 11 |
| 5 | 486.219454 | 243.613365      | 468.208889     | 234.608082       | V    | 1080.541911 | 540.774594      | 1063.515362    | 532.261319       | 1062.531346    | 531.769311       | 10 |
| 6 | 601.246397 | 301.126837      | 583.235832     | 292.121554       | D    | 981.473497  | 491.240387      | 964.446948     | 482.727112       | 963.462932     | 482.235104       | 9  |

|    |                    |                   |                    |                   |   |                   |            |            |            |            |            |   |
|----|--------------------|-------------------|--------------------|-------------------|---|-------------------|------------|------------|------------|------------|------------|---|
| 7  | <b>702.294076</b>  | 351.650676        | 684.283511         | 342.645394        | T | <b>866.446554</b> | 433.726915 | 849.420005 | 425.213641 | 848.435989 | 424.721633 | 8 |
| 8  | 789.326104         | 395.166690        | <b>771.315539</b>  | 386.161408        | S | <b>765.398875</b> | 383.203076 | 748.372326 | 374.689801 | 747.388310 | 374.197793 | 7 |
| 9  | 876.358132         | 438.682704        | <b>858.347567</b>  | 429.677421        | S | <b>678.366847</b> | 339.687062 | 661.340298 | 331.173787 | 660.356282 | 330.681779 | 6 |
| 10 | <b>1005.400725</b> | <b>503.204001</b> | <b>987.390160</b>  | 494.198718        | E | <b>591.334819</b> | 296.171048 | 574.308270 | 287.657773 | 573.324254 | 287.165765 | 5 |
| 11 | <b>1118.484789</b> | 559.746033        | <b>1100.474224</b> | 550.740750        | I | <b>462.292226</b> | 231.649751 | 445.265677 | 223.136477 | 444.281661 | 222.644469 | 4 |
| 12 | <b>1219.532468</b> | 610.269872        | 1201.521903        | <b>601.264590</b> | T | <b>349.208162</b> | 175.107719 | 332.181613 | 166.594445 | 331.197597 | 166.102437 | 3 |
| 13 | <b>1320.580147</b> | 660.793712        | <b>1302.569582</b> | 651.788429        | T | <b>248.160483</b> | 124.583879 | 231.133934 | 116.070605 | 230.149918 | 115.578597 | 2 |
| 14 |                    |                   |                    |                   | K | 147.112804        | 74.060040  | 130.086255 | 65.546765  |            |            | 1 |

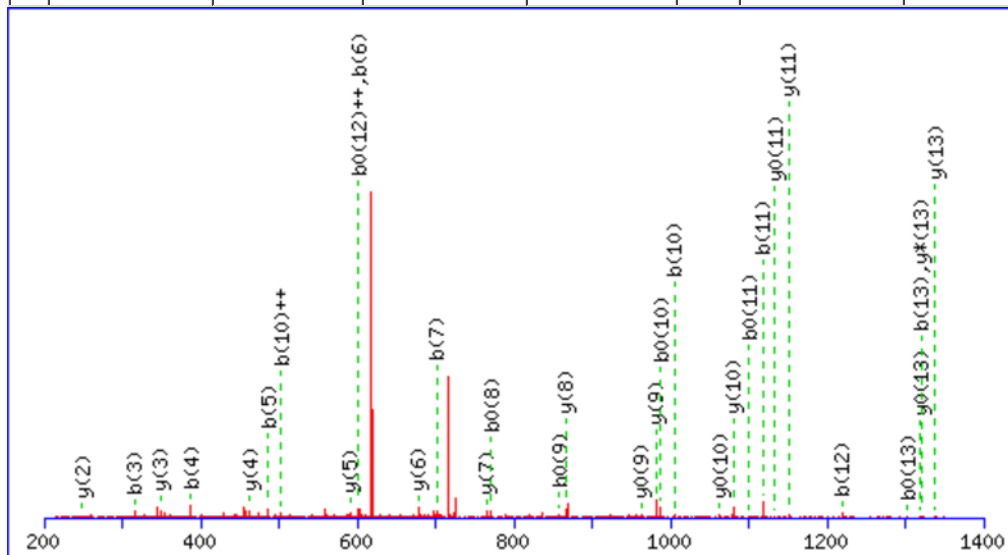

## Peptide View

MS/MS Fragmentation of **CQCPAGAALQADGR**

Found in **IP100010737**, Tax\_Id=9606 Gene\_Symbol=THBD Thrombomodulin

Experiment: 33 - OPA-3 Fraction: OPA-3

Match to Query 10473: 1473.645448 from(737.830000,2+)

Title: OECHL100317\_11.8060.8060.2.dta

Data file \\Boromir\masse\Data LTQ-Orbitrap\Chrystelle Lacroix\Etude clinique sJPU\OECHL100317\_11.raw

**Monoisotopic mass of neutral peptide Mr(calc): 1473.645279** Fixed modifications: Carbamidomethyl (C) (apply to specified residues or termini only) **Ions Score: 68**

**Expect:** 7.6e-006**Matches :** 26/128 fragment ions using 52 most intense peaks ([help](#))

| #  | b                  | b <sup>++</sup> | b*                 | b <sup>*++</sup> | b <sup>0</sup> | b <sup>0++</sup> | Seq. | y                  | y <sup>++</sup>   | y*                | y <sup>*++</sup> | y <sup>0</sup> | y <sup>0++</sup> | #  |
|----|--------------------|-----------------|--------------------|------------------|----------------|------------------|------|--------------------|-------------------|-------------------|------------------|----------------|------------------|----|
| 1  | 161.037925         | 81.022600       |                    |                  |                |                  | C    |                    |                   |                   |                  |                |                  | 14 |
| 2  | <b>289.096503</b>  | 145.051890      | 272.069954         | 136.538615       |                |                  | Q    | 1314.621912        | 657.814594        | 1297.595363       | 649.301320       | 1296.611347    | 648.809312       | 13 |
| 3  | <b>449.127152</b>  | 225.067214      | <b>432.100603</b>  | 216.553940       |                |                  | C    | <b>1186.563334</b> | <b>593.785305</b> | 1169.536785       | 585.272031       | 1168.552769    | 584.780023       | 12 |
| 4  | <b>546.179916</b>  | 273.593596      | 529.153367         | 265.080322       |                |                  | P    | <b>1026.532685</b> | 513.769981        | 1009.506136       | 505.256706       | 1008.522120    | 504.764698       | 11 |
| 5  | <b>617.217030</b>  | 309.112153      | 600.190481         | 300.598879       |                |                  | A    | <b>929.479921</b>  | 465.243599        | <b>912.453372</b> | 456.730324       | 911.469356     | 456.238316       | 10 |
| 6  | <b>674.238494</b>  | 337.622885      | 657.211945         | 329.109611       |                |                  | G    | <b>858.442807</b>  | 429.725042        | 841.416258        | 421.211767       | 840.432242     | 420.719759       | 9  |
| 7  | 745.275608         | 373.141442      | <b>728.249059</b>  | 364.628168       |                |                  | A    | 801.421343         | 401.214310        | 784.394794        | 392.701035       | 783.410778     | 392.209027       | 8  |
| 8  | <b>816.312722</b>  | 408.659999      | 799.286173         | 400.146725       |                |                  | A    | 730.384229         | 365.695753        | 713.357680        | 357.182478       | 712.373664     | 356.690470       | 7  |
| 9  | <b>929.396786</b>  | 465.202031      | <b>912.370237</b>  | 456.688757       |                |                  | L    | <b>659.347115</b>  | 330.177196        | 642.320566        | 321.663921       | 641.336550     | 321.171913       | 6  |
| 10 | <b>1057.455364</b> | 529.231320      | 1040.428815        | 520.718046       |                |                  | Q    | <b>546.263051</b>  | 273.635164        | 529.236502        | 265.121889       | 528.252486     | 264.629881       | 5  |
| 11 | <b>1128.492478</b> | 564.749877      | 1111.465929        | 556.236603       |                |                  | A    | <b>418.204473</b>  | 209.605874        | 401.177924        | 201.092600       | 400.193908     | 200.600592       | 4  |
| 12 | <b>1243.519421</b> | 622.263349      | <b>1226.492872</b> | 613.750074       | 1225.508856    | 613.258066       | D    | <b>347.167359</b>  | 174.087317        | 330.140810        | 165.574043       | 329.156794     | 165.082035       | 3  |
| 13 | <b>1300.540885</b> | 650.774081      | 1283.514336        | 642.260806       | 1282.530320    | 641.768798       | G    | <b>232.140416</b>  | 116.573846        | 215.113867        | 108.060571       |                |                  | 2  |
| 14 |                    |                 |                    |                  |                |                  | R    | 175.118952         | 88.063114         | 158.092403        | 79.549839        |                |                  | 1  |

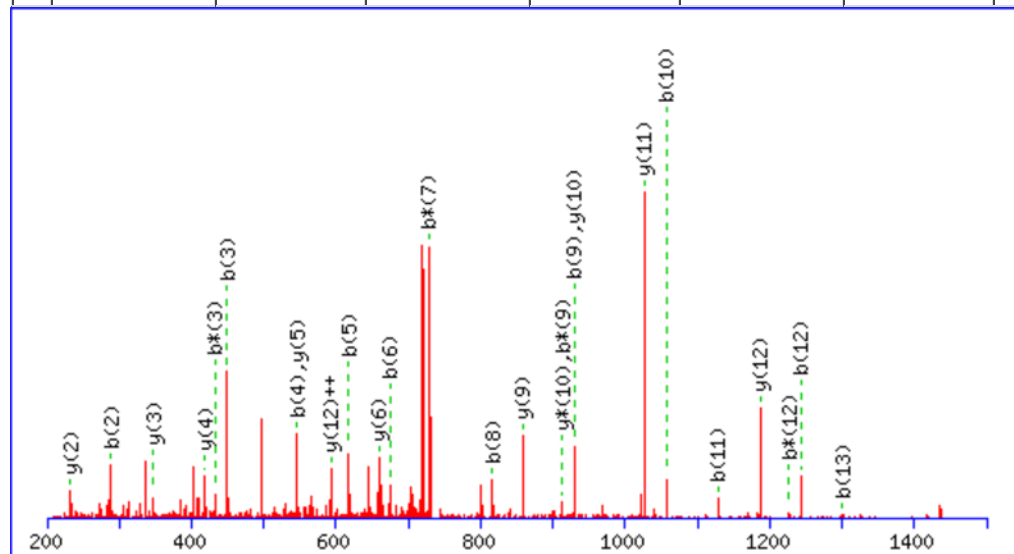

## Peptide View

MS/MS Fragmentation of **GKIEEDSEVLMMIK**

Found in **IPI00034319**, Tax\_Id=9606 Gene\_Symbol=CUTA Isoform A of Protein CutA

**Experiment:** 33 - OPA-3 **Fraction:** OPA-3

Match to Query 11854: 1620.811848 from(811.413200,2+)

Title: OECHL100317\_11.17578.17578.2.dta

Data file \\Boromir\masse\Data LTQ-Orbitrap\Chrystelle Lacroix\Etude clinique sJPU\OECHL100317\_11.raw

**Monoisotopic mass of neutral peptide Mr(calc):** 1620.810242 **Fixed modifications:** Carbamidomethyl (C) (apply to specified residues or termini only) **Ions Score:** 65

**Expect:** 4.2e-005 **Matches :** 24/136 fragment ions using 41 most intense peaks ([help](#))

| #  | b                  | b <sup>++</sup> | b*                | b <sup>*++</sup>  | b <sup>0</sup>    | b <sup>0++</sup>  | Seq.     | y                  | y <sup>++</sup>   | y*                 | y <sup>*++</sup> | y <sup>0</sup> | y <sup>0++</sup> | #         |
|----|--------------------|-----------------|-------------------|-------------------|-------------------|-------------------|----------|--------------------|-------------------|--------------------|------------------|----------------|------------------|-----------|
| 1  | 58.028740          | 29.518008       |                   |                   |                   |                   | <b>G</b> |                    |                   |                    |                  |                |                  | <b>14</b> |
| 2  | 186.123703         | 93.565489       | 169.097154        | 85.052215         |                   |                   | <b>K</b> | 1564.796093        | 782.901684        | 1547.769544        | 774.388410       | 1546.785528    | 773.896402       | <b>13</b> |
| 3  | <b>299.207767</b>  | 150.107521      | 282.181218        | 141.594247        |                   |                   | <b>I</b> | <b>1436.701130</b> | <b>718.854203</b> | 1419.674581        | 710.340929       | 1418.690565    | 709.848920       | <b>12</b> |
| 4  | <b>428.250360</b>  | 214.628818      | <b>411.223811</b> | 206.115544        | <b>410.239795</b> | 205.623536        | <b>E</b> | <b>1323.617066</b> | 662.312171        | 1306.590517        | 653.798896       | 1305.606501    | 653.306888       | <b>11</b> |
| 5  | <b>557.292953</b>  | 279.150115      | 540.266404        | 270.636840        | 539.282388        | 270.144832        | <b>E</b> | <b>1194.574473</b> | 597.790874        | <b>1177.547924</b> | 589.277600       | 1176.563908    | 588.785592       | <b>10</b> |
| 6  | <b>672.319896</b>  | 336.663586      | 655.293347        | 328.150312        | 654.309331        | 327.658304        | <b>D</b> | <b>1065.531880</b> | 533.269578        | 1048.505331        | 524.756303       | 1047.521315    | 524.264295       | <b>9</b>  |
| 7  | 759.351924         | 380.179600      | 742.325375        | 371.666326        | 741.341359        | 371.174318        | <b>S</b> | <b>950.504937</b>  | 475.756106        | 933.478388         | 467.242832       | 932.494372     | 466.750824       | <b>8</b>  |
| 8  | 888.394517         | 444.700897      | 871.367968        | 436.187622        | 870.383952        | 435.695614        | <b>E</b> | <b>863.472909</b>  | 432.240092        | 846.446360         | 423.726818       | 845.462344     | 423.234810       | <b>7</b>  |
| 9  | <b>987.462931</b>  | 494.235104      | 970.436382        | 485.721829        | 969.452366        | 485.229821        | <b>V</b> | 734.430316         | 367.718796        | 717.403767         | 359.205521       |                |                  | <b>6</b>  |
| 10 | <b>1100.546995</b> | 550.777135      | 1083.520446       | 542.263861        | 1082.536430       | 541.771853        | <b>L</b> | <b>635.361902</b>  | 318.184589        | 618.335353         | 309.671314       |                |                  | <b>5</b>  |
| 11 | <b>1231.587480</b> | 616.297378      | 1214.560931       | 607.784104        | 1213.576915       | 607.292095        | <b>M</b> | <b>522.277838</b>  | 261.642557        | 505.251289         | 253.129282       |                |                  | <b>4</b>  |
| 12 | 1362.627965        | 681.817620      | 1345.601416       | <b>673.304346</b> | 1344.617400       | <b>672.812338</b> | <b>M</b> | <b>391.237353</b>  | 196.122314        | 374.210804         | 187.609040       |                |                  | <b>3</b>  |
| 13 | <b>1475.712029</b> | 738.359652      | 1458.685480       | 729.846378        | 1457.701464       | 729.354370        | <b>I</b> | <b>260.196868</b>  | 130.602072        | 243.170319         | 122.088797       |                |                  | <b>2</b>  |
| 14 |                    |                 |                   |                   |                   |                   | <b>K</b> | 147.112804         | 74.060040         | 130.086255         | 65.546765        |                |                  | <b>1</b>  |



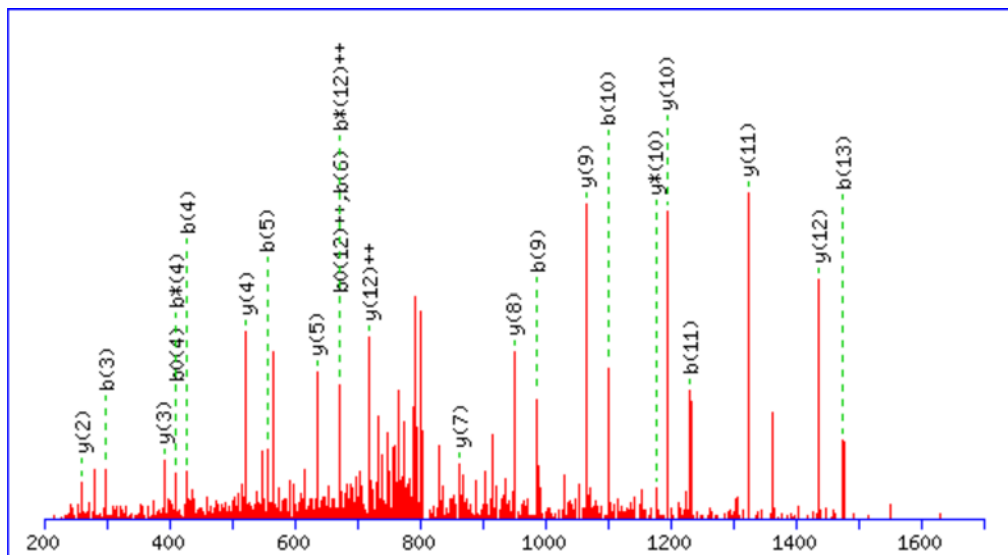

## Peptide View

MS/MS Fragmentation of **HHHSSGGTDQDIPR**

Found in **IPI00790100**, Tax\_Id=9606 Gene\_Symbol=PRH1;PRR4;PRH2 cDNA FLJ54977, weakly similar to Proline-rich protein 4

**Experiment:** 33 - OPA-3 **Fraction:** OPA-3

Match to Query 12451: 1670.749572 from(557.923800,3+)

Title: OECHL100317\_11.2959.2959.3.dta

Data file \\Boromir\masse\Data LTQ-Orbitrap\Chrystelle Lacroix\Etude clinique sJPU\OECHL100317\_11.raw

**Monoisotopic mass of neutral peptide Mr(calc):** 1670.750961 **Fixed modifications:** Carbamidomethyl (C) (apply to specified residues or termini only) **Ions Score:** 61

**Expect:** 6.1e-005 **Matches :** 42/138 fragment ions using 68 most intense peaks ([help](#))

| # | b                 | b <sup>++</sup> | b* | b <sup>*++</sup> | b <sup>0</sup> | b <sup>0++</sup>  | Seq. | y                  | y <sup>++</sup>   | y*                 | y <sup>*++</sup> | y <sup>0</sup>     | y <sup>0++</sup>  | #  |
|---|-------------------|-----------------|----|------------------|----------------|-------------------|------|--------------------|-------------------|--------------------|------------------|--------------------|-------------------|----|
| 1 | 138.066188        | 69.536732       |    |                  |                |                   | H    |                    |                   |                    |                  |                    |                   | 15 |
| 2 | <b>275.125100</b> | 138.066188      |    |                  |                |                   | H    | 1534.699309        | <b>767.853293</b> | 1517.672760        | 759.340018       | 1516.688744        | <b>758.848010</b> | 14 |
| 3 | 412.184012        | 206.595644      |    |                  |                |                   | H    | 1397.640397        | <b>699.323837</b> | 1380.613848        | 690.810562       | 1379.629832        | 690.318554        | 13 |
| 4 | 499.216040        | 250.111658      |    |                  | 481.205475     | 241.106375        | S    | <b>1260.581485</b> | 630.794381        | <b>1243.554936</b> | 622.281106       | 1242.570920        | 621.789098        | 12 |
| 5 | <b>586.248068</b> | 293.627672      |    |                  | 568.237503     | <b>284.622390</b> | S    | <b>1173.549457</b> | <b>587.278367</b> | 1156.522908        | 578.765092       | 1155.538892        | <b>578.273084</b> | 11 |
| 6 | 643.269532        | 322.138404      |    |                  | 625.258967     | 313.133122        | G    | <b>1086.517429</b> | 543.762353        | 1069.490880        | 535.249078       | <b>1068.506864</b> | 534.757070        | 10 |

|    |             |            |             |            |             |            |   |             |            |             |            |             |            |   |
|----|-------------|------------|-------------|------------|-------------|------------|---|-------------|------------|-------------|------------|-------------|------------|---|
| 7  | 700.290996  | 350.649136 |             |            | 682.280431  | 341.643854 | G | 1029.495965 | 515.251621 | 1012.469416 | 506.738346 | 1011.485400 | 506.246338 | 9 |
| 8  | 801.338675  | 401.172976 |             |            | 783.328110  | 392.167693 | T | 972.474501  | 486.740889 | 955.447952  | 478.227614 | 954.463936  | 477.735606 | 8 |
| 9  | 916.365618  | 458.686447 |             |            | 898.355053  | 449.681165 | D | 871.426822  | 436.217049 | 854.400273  | 427.703775 | 853.416257  | 427.211767 | 7 |
| 10 | 1044.424196 | 522.715736 | 1027.397647 | 514.202462 | 1026.413631 | 513.710454 | Q | 756.399879  | 378.703578 | 739.373330  | 370.190303 | 738.389314  | 369.698295 | 6 |
| 11 | 1172.482774 | 586.745025 | 1155.456225 | 578.231751 | 1154.472209 | 577.739743 | Q | 628.341301  | 314.674289 | 611.314752  | 306.161014 | 610.330736  | 305.669006 | 5 |
| 12 | 1287.509717 | 644.258497 | 1270.483168 | 635.745222 | 1269.499152 | 635.253214 | D | 500.282723  | 250.644999 | 483.256174  | 242.131725 | 482.272158  | 241.639717 | 4 |
| 13 | 1400.593781 | 700.800529 | 1383.567232 | 692.287254 | 1382.583216 | 691.795246 | I | 385.255780  | 193.131528 | 368.229231  | 184.618253 |             |            | 3 |
| 14 | 1497.646545 | 749.326911 | 1480.619996 | 740.813636 | 1479.635980 | 740.321628 | P | 272.171716  | 136.589496 | 255.145167  | 128.076221 |             |            | 2 |
| 15 |             |            |             |            |             |            | R | 175.118952  | 88.063114  | 158.092403  | 79.549839  |             |            | 1 |

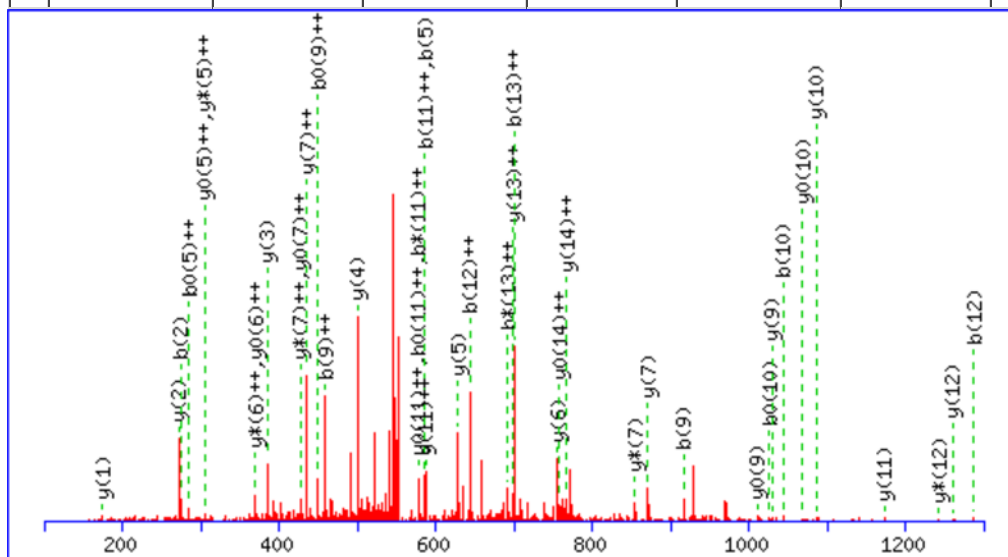

## Peptide View

MS/MS Fragmentation of **HLAQVGD~~S~~MDR**

Found in **IP100413587**, Tax\_Id=9606 Gene\_Symbol=BID Isoform 1 of BH3-interacting domain death agonist

**Experiment: 33 - OPA-3 Fraction: OPA-3**

Match to Query 7639: 1227.567048 from(614.790800,2+)

Title: OECHL100317\_11.5842.5842.2.dta

Data file \\Boromir\masse\Data LTQ-Orbitrap\Chrystelle Lacroix\Etude clinique sJPU\OECHL100317\_11.raw

**Monoisotopic mass of neutral peptide Mr(calc):** 1227.566620**Fixed modifications:** Carbamidomethyl (C) (apply to specified residues or termini only)**Ions Score:** 50  
**Expect:** 0.00071**Matches :** 10/100 fragment ions using 11 most intense peaks ([help](#))

| #  | b                 | b <sup>++</sup> | b*          | b <sup>*++</sup> | b <sup>0</sup> | b <sup>0++</sup> | Seq. | y                  | y <sup>++</sup> | y*                | y <sup>*++</sup> | y <sup>0</sup> | y <sup>0++</sup> | #  |
|----|-------------------|-----------------|-------------|------------------|----------------|------------------|------|--------------------|-----------------|-------------------|------------------|----------------|------------------|----|
| 1  | 138.066188        | 69.536732       |             |                  |                |                  | H    |                    |                 |                   |                  |                |                  | 11 |
| 2  | <b>251.150252</b> | 126.078764      |             |                  |                |                  | L    | <b>1091.514985</b> | 546.261131      | 1074.488436       | 537.747856       | 1073.504420    | 537.255848       | 10 |
| 3  | 322.187366        | 161.597321      |             |                  |                |                  | A    | <b>978.430921</b>  | 489.719099      | 961.404372        | 481.205824       | 960.420356     | 480.713816       | 9  |
| 4  | <b>450.245944</b> | 225.626610      | 433.219395  | 217.113335       |                |                  | Q    | <b>907.393807</b>  | 454.200542      | 890.367258        | 445.687267       | 889.383242     | 445.195259       | 8  |
| 5  | 549.314358        | 275.160817      | 532.287809  | 266.647542       |                |                  | V    | <b>779.335229</b>  | 390.171253      | 762.308680        | 381.657978       | 761.324664     | 381.165970       | 7  |
| 6  | <b>606.335822</b> | 303.671549      | 589.309273  | 295.158275       |                |                  | G    | <b>680.266815</b>  | 340.637046      | 663.240266        | 332.123771       | 662.256250     | 331.631763       | 6  |
| 7  | 721.362765        | 361.185021      | 704.336216  | 352.671746       | 703.352200     | 352.179738       | D    | 623.245351         | 312.126314      | <b>606.218802</b> | 303.613039       | 605.234786     | 303.121031       | 5  |
| 8  | 808.394793        | 404.701034      | 791.368244  | 396.187760       | 790.384228     | 395.695752       | S    | <b>508.218408</b>  | 254.612842      | 491.191859        | 246.099567       | 490.207843     | 245.607559       | 4  |
| 9  | 939.435278        | 470.221277      | 922.408729  | 461.708002       | 921.424713     | 461.215994       | M    | 421.186380         | 211.096828      | 404.159831        | 202.583553       | 403.175815     | 202.091546       | 3  |
| 10 | 1054.462221       | 527.734749      | 1037.435672 | 519.221474       | 1036.451656    | 518.729466       | D    | 290.145895         | 145.576585      | 273.119346        | 137.063311       | 272.135330     | 136.571303       | 2  |
| 11 |                   |                 |             |                  |                |                  | R    | 175.118952         | 88.063114       | 158.092403        | 79.549839        |                |                  | 1  |

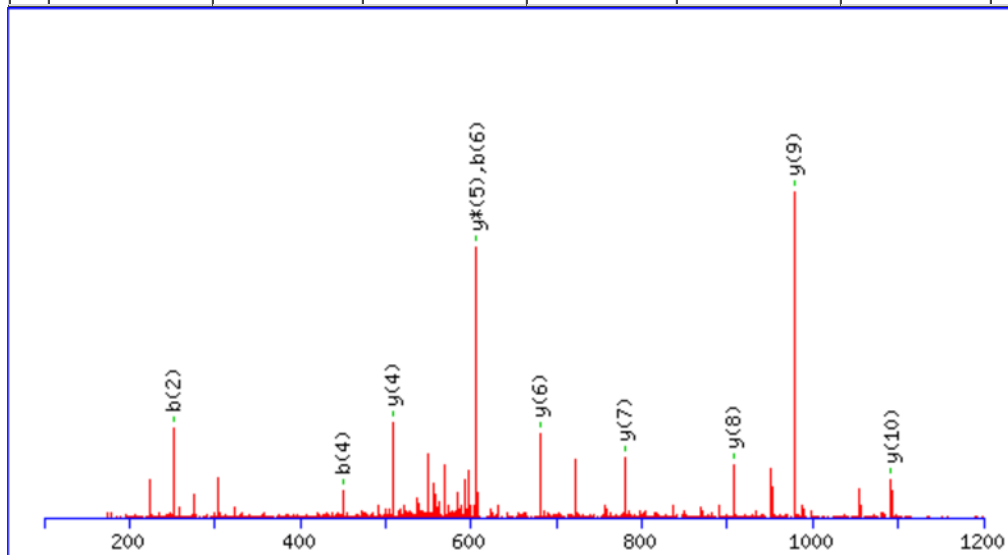

## Peptide View

MS/MS Fragmentation of **EIVLTQSPATLSLSPGER**

Found in **IPI00816799**, Tax\_Id=9606 Gene\_Symbol=- Rheumatoid factor D5 light chain (Fragment)

**Experiment:** 54 - PyC-3 **Fraction:** PyC-3

Match to Query 14798: 1897.017248 from(949.515900,2+)

Title: OECHL100317\_09.16384.16384.2.dta

Data file \\Boromir\masse\Data LTQ-Orbitrap\Chrystelle Lacroix\Etude clinique sJPU\OECHL100317\_09.raw

**Monoisotopic mass of neutral peptide Mr(calc):** 1897.015640**Fixed modifications:** Carbamidomethyl (C) (apply to specified residues or termini only)**Ions Score:** 113

**Expect:** 4.5e-010**Matches :** 24/192 fragment ions using 31 most intense peaks ([help](#))

| #  | b                  | b <sup>++</sup>   | b <sup>*</sup> | b <sup>*++</sup> | b <sup>0</sup>     | b <sup>0++</sup> | Seq. | y                  | y <sup>++</sup>   | y <sup>*</sup> | y <sup>*++</sup> | y <sup>0</sup> | y <sup>0++</sup> | #  |
|----|--------------------|-------------------|----------------|------------------|--------------------|------------------|------|--------------------|-------------------|----------------|------------------|----------------|------------------|----|
| 1  | 130.049869         | 65.528572         |                |                  | 112.039304         | 56.523290        | E    |                    |                   |                |                  |                |                  | 18 |
| 2  | 243.133933         | 122.070605        |                |                  | 225.123368         | 113.065322       | I    | 1768.980341        | 884.993808        | 1751.953792    | 876.480534       | 1750.969776    | 875.988526       | 17 |
| 3  | <b>342.202347</b>  | 171.604812        |                |                  | 324.191782         | 162.599529       | V    | <b>1655.896277</b> | 828.451776        | 1638.869728    | 819.938502       | 1637.885712    | 819.446494       | 16 |
| 4  | 455.286411         | 228.146844        |                |                  | 437.275846         | 219.141561       | L    | <b>1556.827863</b> | <b>778.917569</b> | 1539.801314    | 770.404295       | 1538.817298    | 769.912287       | 15 |
| 5  | 556.334090         | 278.670683        |                |                  | <b>538.323525</b>  | 269.665401       | T    | <b>1443.743799</b> | 722.375537        | 1426.717250    | 713.862263       | 1425.733234    | 713.370255       | 14 |
| 6  | 684.392668         | <b>342.699972</b> | 667.366119     | 334.186698       | <b>666.382103</b>  | 333.694690       | Q    | <b>1342.696120</b> | 671.851698        | 1325.669571    | 663.338423       | 1324.685555    | 662.846415       | 13 |
| 7  | 771.424696         | 386.215986        | 754.398147     | 377.702712       | <b>753.414131</b>  | 377.210704       | S    | <b>1214.637542</b> | 607.822409        | 1197.610993    | 599.309134       | 1196.626977    | 598.817126       | 12 |
| 8  | 868.477460         | 434.742368        | 851.450911     | 426.229094       | 850.466895         | 425.737086       | P    | <b>1127.605514</b> | 564.306395        | 1110.578965    | 555.793120       | 1109.594949    | 555.301112       | 11 |
| 9  | 939.514574         | 470.260925        | 922.488025     | 461.747651       | 921.504009         | 461.255643       | A    | <b>1030.552750</b> | 515.780013        | 1013.526201    | 507.266738       | 1012.542185    | 506.774730       | 10 |
| 10 | <b>1040.562253</b> | 520.784765        | 1023.535704    | 512.271490       | 1022.551688        | 511.779482       | T    | <b>959.515636</b>  | 480.261456        | 942.489087     | 471.748181       | 941.505071     | 471.256173       | 9  |
| 11 | <b>1153.646317</b> | 577.326797        | 1136.619768    | 568.813522       | 1135.635752        | 568.321514       | L    | <b>858.467957</b>  | 429.737616        | 841.441408     | 421.224342       | 840.457392     | 420.732334       | 8  |
| 12 | 1240.678345        | 620.842811        | 1223.651796    | 612.329536       | 1222.667780        | 611.837528       | S    | <b>745.383893</b>  | 373.195585        | 728.357344     | 364.682310       | 727.373328     | 364.190302       | 7  |
| 13 | 1353.762409        | 677.384842        | 1336.735860    | 668.871568       | <b>1335.751844</b> | 668.379560       | L    | <b>658.351865</b>  | 329.679570        | 641.325316     | 321.166296       | 640.341300     | 320.674288       | 6  |
| 14 | <b>1440.794437</b> | 720.900857        | 1423.767888    | 712.387582       | 1422.783872        | 711.895574       | S    | <b>545.267801</b>  | 273.137539        | 528.241252     | 264.624264       | 527.257236     | 264.132256       | 5  |
| 15 | 1537.847201        | 769.427239        | 1520.820652    | 760.913964       | 1519.836636        | 760.421956       | P    | <b>458.235773</b>  | 229.621524        | 441.209224     | 221.108250       | 440.225208     | 220.616242       | 4  |
| 16 | 1594.868665        | 797.937971        | 1577.842116    | 789.424696       | 1576.858100        | 788.932688       | G    | 361.183009         | 181.095142        | 344.156460     | 172.581868       | 343.172444     | 172.089860       | 3  |
| 17 | <b>1723.911258</b> | 862.459267        | 1706.884709    | 853.945992       | 1705.900693        | 853.453984       | E    | 304.161545         | 152.584410        | 287.134996     | 144.071136       | 286.150980     | 143.579128       | 2  |
| 18 |                    |                   |                |                  |                    |                  | R    | 175.118952         | 88.063114         | 158.092403     | 79.549839        |                |                  | 1  |

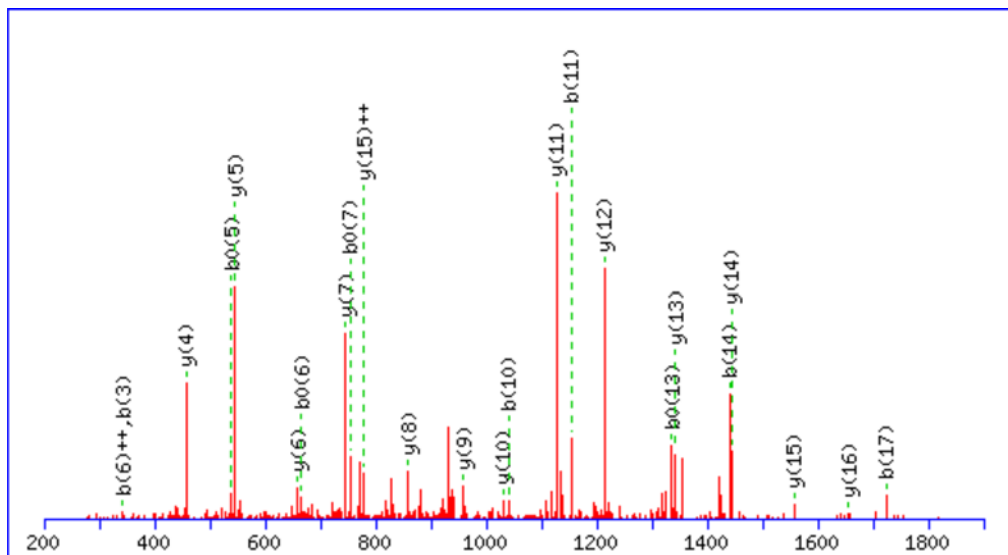

## Peptide View

MS/MS Fragmentation of **ACANPAAGSVILLENLR**

Found in **IPI00169383**, Tax\_Id=9606 Gene\_Symbol=PGK1 Phosphoglycerate kinase 1

**Experiment:** 54 - PyC-3 **Fraction:** PyC-3

Match to Query 13940: 1767.931448 from(884.973000,2+)

Title: OECHL100317\_09.19797.19797.2.dta

Data file \\Boromir\masse\Data LTQ-Orbitrap\Chrystelle Lacroix\Etude clinique sJPU\OECHL100317\_09.raw

**Monoisotopic mass of neutral peptide Mr(calc):** 1767.930115 **Fixed modifications:** Carbamidomethyl (C) (apply to specified residues or termini only) **Ions Score:** 107

**Expect:** 2.1e-009 **Matches :** 33/164 fragment ions using 60 most intense peaks ([help](#))

| # | b                 | b <sup>++</sup> | b*                | b* <sup>++</sup> | b <sup>0</sup> | b <sup>0++</sup> | Seq. | y                  | y <sup>++</sup>   | y*                 | y* <sup>++</sup> | y <sup>0</sup>     | y <sup>0++</sup> | #  |
|---|-------------------|-----------------|-------------------|------------------|----------------|------------------|------|--------------------|-------------------|--------------------|------------------|--------------------|------------------|----|
| 1 | 72.044390         | 36.525833       |                   |                  |                |                  | A    |                    |                   |                    |                  |                    |                  | 17 |
| 2 | 232.075039        | 116.541158      |                   |                  |                |                  | C    | <b>1697.900316</b> | 849.453796        | 1680.873767        | 840.940521       | 1679.889751        | 840.448513       | 16 |
| 3 | <b>303.112153</b> | 152.059714      |                   |                  |                |                  | A    | <b>1537.869667</b> | 769.438471        | 1520.843118        | 760.925197       | <b>1519.859102</b> | 760.433189       | 15 |
| 4 | <b>417.155080</b> | 209.081178      | <b>400.128531</b> | 200.567904       |                |                  | N    | <b>1466.832553</b> | 733.919914        | 1449.806004        | 725.406640       | 1448.821988        | 724.914632       | 14 |
| 5 | 514.207844        | 257.607560      | <b>497.181295</b> | 249.094286       |                |                  | P    | <b>1352.789626</b> | <b>676.898451</b> | 1335.763077        | 668.385176       | 1334.779061        | 667.893168       | 13 |
| 6 | <b>585.244958</b> | 293.126117      | <b>568.218409</b> | 284.612843       |                |                  | A    | <b>1255.736862</b> | 628.372069        | <b>1238.710313</b> | 619.858794       | 1237.726297        | 619.366786       | 12 |

|    |                    |                   |                    |            |             |            |   |                    |            |             |            |             |            |           |
|----|--------------------|-------------------|--------------------|------------|-------------|------------|---|--------------------|------------|-------------|------------|-------------|------------|-----------|
| 7  | <b>656.282072</b>  | 328.644674        | <b>639.255523</b>  | 320.131399 |             |            | A | <b>1184.699748</b> | 592.853512 | 1167.673199 | 584.340237 | 1166.689183 | 583.848229 | <b>11</b> |
| 8  | <b>713.303536</b>  | 357.155406        | 696.276987         | 348.642132 |             |            | G | <b>1113.662634</b> | 557.334955 | 1096.636085 | 548.821680 | 1095.652069 | 548.329672 | <b>10</b> |
| 9  | 800.335564         | <b>400.671420</b> | 783.309015         | 392.158145 | 782.324999  | 391.666137 | S | <b>1056.641170</b> | 528.824223 | 1039.614621 | 520.310948 | 1038.630605 | 519.818940 | <b>9</b>  |
| 10 | 899.403978         | 450.205627        | 882.377429         | 441.692352 | 881.393413  | 441.200344 | V | <b>969.609142</b>  | 485.308209 | 952.582593  | 476.794934 | 951.598577  | 476.302926 | <b>8</b>  |
| 11 | <b>1012.488042</b> | 506.747659        | 995.461493         | 498.234384 | 994.477477  | 497.742376 | I | <b>870.540728</b>  | 435.774002 | 853.514179  | 427.260727 | 852.530163  | 426.768719 | <b>7</b>  |
| 12 | 1125.572106        | 563.289691        | 1108.545557        | 554.776416 | 1107.561541 | 554.284408 | L | <b>757.456664</b>  | 379.231970 | 740.430115  | 370.718695 | 739.446099  | 370.226687 | <b>6</b>  |
| 13 | <b>1238.656170</b> | 619.831723        | 1221.629621        | 611.318448 | 1220.645605 | 610.826440 | L | <b>644.372600</b>  | 322.689938 | 627.346051  | 314.176663 | 626.362035  | 313.684655 | <b>5</b>  |
| 14 | <b>1367.698763</b> | 684.353019        | 1350.672214        | 675.839745 | 1349.688198 | 675.347737 | E | <b>531.288536</b>  | 266.147906 | 514.261987  | 257.634631 | 513.277971  | 257.142623 | <b>4</b>  |
| 15 | 1481.741690        | 741.374483        | 1464.715141        | 732.861208 | 1463.731125 | 732.369200 | N | <b>402.245943</b>  | 201.626609 | 385.219394  | 193.113335 |             |            | <b>3</b>  |
| 16 | <b>1594.825754</b> | 797.916515        | <b>1577.799205</b> | 789.403240 | 1576.815189 | 788.911232 | L | <b>288.203016</b>  | 144.605146 | 271.176467  | 136.091871 |             |            | <b>2</b>  |
| 17 |                    |                   |                    |            |             |            | R | 175.118952         | 88.063114  | 158.092403  | 79.549839  |             |            | <b>1</b>  |

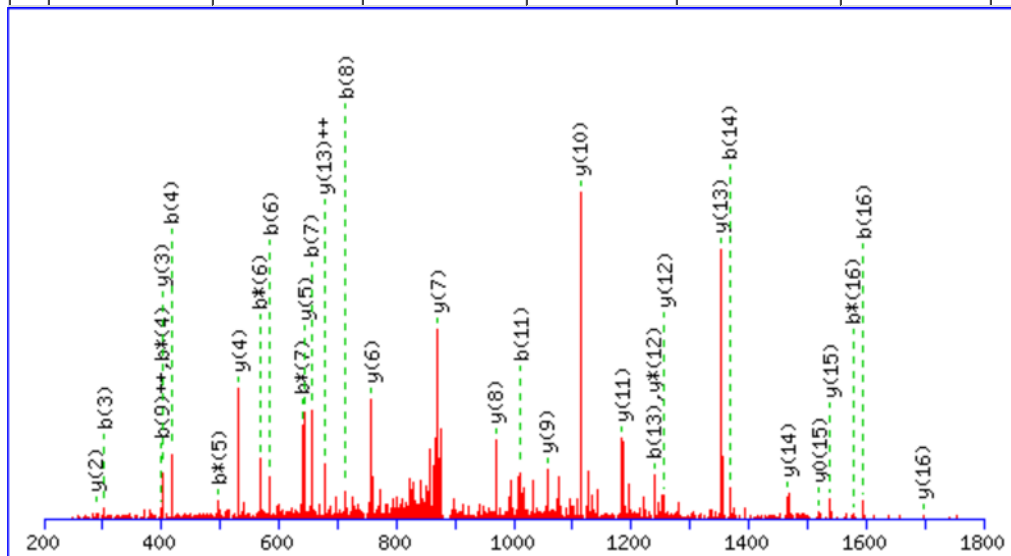

## Peptide View

MS/MS Fragmentation of **EVQLVESGGGLVKGGSRLR**

Found in **IP100783024**, Tax\_Id=9606 Gene\_Symbol=- Myosin-reactive immunoglobulin heavy chain variable region (Fragment)

Experiment: 54 - PyC-3 Fraction: PyC-3

Match to Query 14687: 1881.030048 from(941.522300,2+)

Title: OECHL100317\_09.13780.13780.2.dta

Data file \\Boromir\masse\Data LTQ-Orbitrap\Chrystelle Lacroix\Etude clinique sJPU\OECHL100317\_09.raw

**Monoisotopic mass of neutral peptide Mr(calc):** 1881.031982**Fixed modifications:** Carbamidomethyl (C) (apply to specified residues or termini only)**Ions Score:** 78**Expect:** 1e-006**Matches :** 16/208 fragment ions using 16 most intense peaks ([help](#))

| #  | b           | b <sup>++</sup> | b*          | b <sup>+++</sup> | b <sup>0</sup> | b <sup>0++</sup> | Seq. | y           | y <sup>++</sup> | y*          | y <sup>+++</sup> | y <sup>0</sup> | y <sup>0++</sup> | #  |
|----|-------------|-----------------|-------------|------------------|----------------|------------------|------|-------------|-----------------|-------------|------------------|----------------|------------------|----|
| 1  | 130.049869  | 65.528572       |             |                  | 112.039304     | 56.523290        | E    |             |                 |             |                  |                |                  | 19 |
| 2  | 229.118283  | 115.062780      |             |                  | 211.107718     | 106.057497       | V    | 1752.996660 | 877.001968      | 1735.970111 | 868.488694       | 1734.986095    | 867.996686       | 18 |
| 3  | 357.176861  | 179.092069      | 340.150312  | 170.578794       | 339.166296     | 170.086786       | Q    | 1653.928246 | 827.467761      | 1636.901697 | 818.954487       | 1635.917681    | 818.462479       | 17 |
| 4  | 470.260925  | 235.634101      | 453.234376  | 227.120826       | 452.250360     | 226.628818       | L    | 1525.869668 | 763.438472      | 1508.843119 | 754.925198       | 1507.859103    | 754.433190       | 16 |
| 5  | 569.329339  | 285.168308      | 552.302790  | 276.655033       | 551.318774     | 276.163025       | V    | 1412.785604 | 706.896440      | 1395.759055 | 698.383166       | 1394.775039    | 697.891158       | 15 |
| 6  | 698.371932  | 349.689604      | 681.345383  | 341.176330       | 680.361367     | 340.684322       | E    | 1313.717190 | 657.362233      | 1296.690641 | 648.848959       | 1295.706625    | 648.356951       | 14 |
| 7  | 785.403960  | 393.205618      | 768.377411  | 384.692344       | 767.393395     | 384.200336       | S    | 1184.674597 | 592.840937      | 1167.648048 | 584.327662       | 1166.664032    | 583.835654       | 13 |
| 8  | 842.425424  | 421.716350      | 825.398875  | 413.203076       | 824.414859     | 412.711068       | G    | 1097.642569 | 549.324923      | 1080.616020 | 540.811648       | 1079.632004    | 540.319640       | 12 |
| 9  | 899.446888  | 450.227082      | 882.420339  | 441.713808       | 881.436323     | 441.221800       | G    | 1040.621105 | 520.814191      | 1023.594556 | 512.300916       | 1022.610540    | 511.808908       | 11 |
| 10 | 956.468352  | 478.737814      | 939.441803  | 470.224540       | 938.457787     | 469.732532       | G    | 983.599641  | 492.303459      | 966.573092  | 483.790184       | 965.589076     | 483.298176       | 10 |
| 11 | 1069.552416 | 535.279846      | 1052.525867 | 526.766572       | 1051.541851    | 526.274564       | L    | 926.578177  | 463.792727      | 909.551628  | 455.279452       | 908.567612     | 454.787444       | 9  |
| 12 | 1168.620830 | 584.814053      | 1151.594281 | 576.300779       | 1150.610265    | 575.808771       | V    | 813.494113  | 407.250695      | 796.467564  | 398.737420       | 795.483548     | 398.245412       | 8  |
| 13 | 1296.715793 | 648.861535      | 1279.689244 | 640.348260       | 1278.705228    | 639.856252       | K    | 714.425699  | 357.716487      | 697.399150  | 349.203213       | 696.415134     | 348.711205       | 7  |
| 14 | 1393.768557 | 697.387917      | 1376.742008 | 688.874642       | 1375.757992    | 688.382634       | P    | 586.330736  | 293.669006      | 569.304187  | 285.155731       | 568.320171     | 284.663723       | 6  |
| 15 | 1450.790021 | 725.898649      | 1433.763472 | 717.385374       | 1432.779456    | 716.893366       | G    | 489.277972  | 245.142624      | 472.251423  | 236.629349       | 471.267407     | 236.137341       | 5  |
| 16 | 1507.811485 | 754.409381      | 1490.784936 | 745.896106       | 1489.800920    | 745.404098       | G    | 432.256508  | 216.631892      | 415.229959  | 208.118617       | 414.245943     | 207.626609       | 4  |
| 17 | 1594.843513 | 797.925395      | 1577.816964 | 789.412120       | 1576.832948    | 788.920112       | S    | 375.235044  | 188.121160      | 358.208495  | 179.607885       | 357.224479     | 179.115877       | 3  |
| 18 | 1707.927577 | 854.467427      | 1690.901028 | 845.954152       | 1689.917012    | 845.462144       | L    | 288.203016  | 144.605146      | 271.176467  | 136.091871       |                |                  | 2  |
| 19 |             |                 |             |                  |                |                  | R    | 175.118952  | 88.063114       | 158.092403  | 79.549839        |                |                  | 1  |

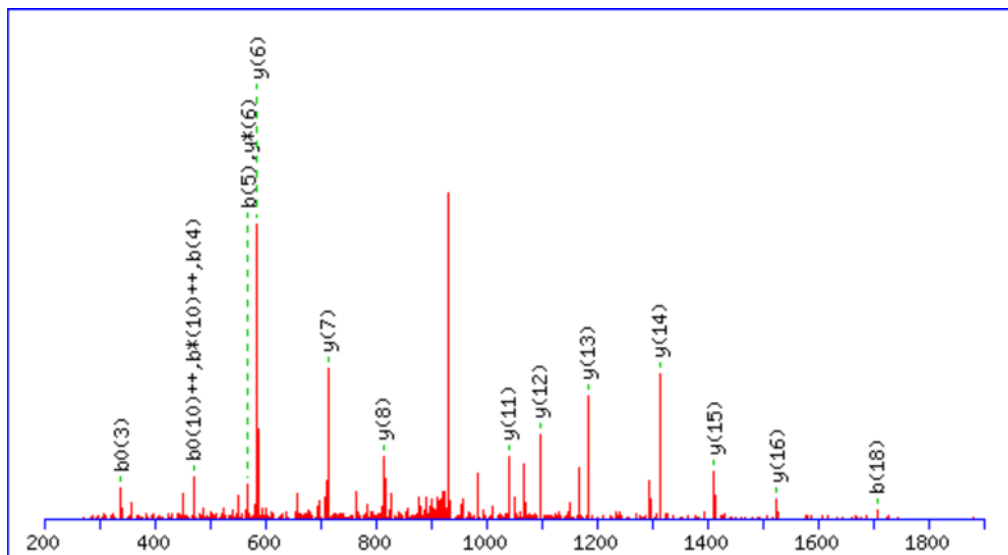

## Peptide View

### MS/MS Fragmentation of **VYSTSVTGSR**

Found in **IPI00010402**, Tax\_Id=9606 Gene\_Symbol=SH3BGRL3 Putative uncharacterized protein

**Experiment:** 54 - PyC-3 **Fraction:** PyC-3

Match to Query 4919: 1055.523448 from(528.769000,2+)

Title: OECHL100317\_09.4489.4489.2.dta

Data file \\Boromir\masse\Data LTQ-Orbitrap\Chrystelle Lacroix\Etude clinique sJPU\OECHL100317\_09.raw

**Monoisotopic mass of neutral peptide Mr(calc):** 1055.524750 **Fixed modifications:** Carbamidomethyl (C) (apply to specified residues or termini only) **Ions Score:** 52

**Expect:** 0.00057 **Matches :** 22/84 fragment ions using 43 most intense peaks ([help](#))

| # | b                 | b <sup>++</sup>   | b <sup>0</sup>    | b <sup>0++</sup> | Seq. | y                 | y <sup>++</sup> | y <sup>*</sup> | y <sup>*++</sup>  | y <sup>0</sup>    | y <sup>0++</sup> | #  |
|---|-------------------|-------------------|-------------------|------------------|------|-------------------|-----------------|----------------|-------------------|-------------------|------------------|----|
| 1 | 100.075690        | 50.541483         |                   |                  | V    |                   |                 |                |                   |                   |                  | 10 |
| 2 | <b>263.139019</b> | 132.073148        |                   |                  | Y    | <b>957.463601</b> | 479.235439      | 940.437052     | <b>470.722164</b> | 939.453036        | 470.230156       | 9  |
| 3 | <b>350.171047</b> | <b>175.589161</b> | 332.160482        | 166.583879       | S    | <b>794.400272</b> | 397.703774      | 777.373723     | 389.190499        | <b>776.389707</b> | 388.698491       | 8  |
| 4 | 451.218726        | 226.113001        | <b>433.208161</b> | 217.107719       | T    | <b>707.368244</b> | 354.187760      | 690.341695     | 345.674486        | 689.357679        | 345.182478       | 7  |
| 5 | 538.250754        | 269.629015        | <b>520.240189</b> | 260.623733       | S    | <b>606.320565</b> | 303.663921      | 589.294016     | 295.150646        | 588.310000        | 294.658638       | 6  |
| 6 | <b>637.319168</b> | <b>319.163222</b> | 619.308603        | 310.157940       | V    | 519.288537        | 260.147907      | 502.261988     | 251.634632        | 501.277972        | 251.142624       | 5  |



|    |                   |            |                   |            |          |                   |            |            |            |            |            |          |
|----|-------------------|------------|-------------------|------------|----------|-------------------|------------|------------|------------|------------|------------|----------|
| 7  | <b>738.366847</b> | 369.687062 | <b>720.356282</b> | 360.681779 | <b>T</b> | <b>420.220123</b> | 210.613699 | 403.193574 | 202.100425 | 402.209558 | 201.608417 | <b>4</b> |
| 8  | <b>795.388311</b> | 398.197794 | 777.377746        | 389.192511 | <b>G</b> | <b>319.172444</b> | 160.089860 | 302.145895 | 151.576585 | 301.161879 | 151.084577 | <b>3</b> |
| 9  | <b>882.420339</b> | 441.713808 | <b>864.409774</b> | 432.708525 | <b>S</b> | <b>262.150980</b> | 131.579128 | 245.124431 | 123.065853 | 244.140415 | 122.573845 | <b>2</b> |
| 10 |                   |            |                   |            | <b>R</b> | <b>175.118952</b> | 88.063114  | 158.092403 | 79.549839  |            |            | <b>1</b> |

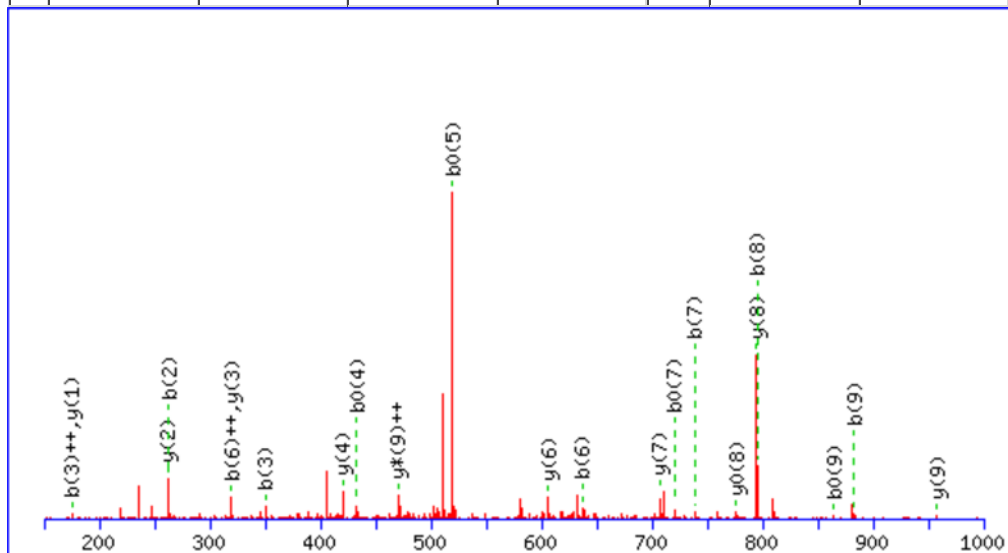

## Peptide View

MS/MS Fragmentation of **YDIALVQEV**R

Found in **IPI00031065**, Tax\_Id=9606 Gene\_Symbol=DNASE1 Deoxyribonuclease-1

**Experiment:** 54 - PyC-3 **Fraction:** PyC-3

Match to Query 7283: 1204.648448 from(603.331500,2+)

Title: OECHL100317\_09.15357.15357.2.dta

Data file \\Boromir\masse\Data LTQ-Orbitrap\Chrystelle Lacroix\Etude clinique sJPU\OECHL100317\_09.raw

**Monoisotopic mass of neutral peptide Mr(calc):** 1204.645172 **Fixed modifications:** Carbamidomethyl (C) (apply to specified residues or termini only) **Ions Score:** 60

**Expect:** 6.9e-005 **Matches :** 20/90 fragment ions using 40 most intense peaks ([help](#))

| #        | <b>b</b>          | <b>b<sup>++</sup></b> | <b>b<sup>*</sup></b> | <b>b<sup>*++</sup></b> | <b>b<sup>0</sup></b> | <b>b<sup>0++</sup></b> | Seq.     | <b>y</b>           | <b>y<sup>++</sup></b> | <b>y<sup>*</sup></b> | <b>y<sup>*++</sup></b> | <b>y<sup>0</sup></b> | <b>y<sup>0++</sup></b> | #         |
|----------|-------------------|-----------------------|----------------------|------------------------|----------------------|------------------------|----------|--------------------|-----------------------|----------------------|------------------------|----------------------|------------------------|-----------|
| <b>1</b> | 164.070605        | 82.538940             |                      |                        |                      |                        | <b>Y</b> |                    |                       |                      |                        |                      |                        | <b>10</b> |
| <b>2</b> | <b>279.097548</b> | 140.052412            |                      |                        | 261.086983           | 131.047130             | <b>D</b> | <b>1042.589136</b> | 521.798206            | 1025.562587          | 513.284932             | 1024.578571          | 512.792924             | <b>9</b>  |

|    |                    |            |             |            |                   |            |          |                   |                   |            |                   |            |            |          |
|----|--------------------|------------|-------------|------------|-------------------|------------|----------|-------------------|-------------------|------------|-------------------|------------|------------|----------|
| 3  | <b>392.181612</b>  | 196.594444 |             |            | 374.171047        | 187.589162 | <b>I</b> | <b>927.562193</b> | <b>464.284735</b> | 910.535644 | 455.771460        | 909.551628 | 455.279452 | <b>8</b> |
| 4  | <b>463.218726</b>  | 232.113001 |             |            | 445.208161        | 223.107719 | <b>A</b> | <b>814.478129</b> | 407.742703        | 797.451580 | 399.229428        | 796.467564 | 398.737420 | <b>7</b> |
| 5  | <b>576.302790</b>  | 288.655033 |             |            | <b>558.292225</b> | 279.649751 | <b>L</b> | <b>743.441015</b> | 372.224146        | 726.414466 | <b>363.710871</b> | 725.430450 | 363.218863 | <b>6</b> |
| 6  | <b>675.371204</b>  | 338.189240 |             |            | 657.360639        | 329.183958 | <b>V</b> | <b>630.356951</b> | 315.682114        | 613.330402 | 307.168839        | 612.346386 | 306.676831 | <b>5</b> |
| 7  | <b>803.429782</b>  | 402.218529 | 786.403233  | 393.705255 | 785.419217        | 393.213247 | <b>Q</b> | <b>531.288537</b> | 266.147907        | 514.261988 | 257.634632        | 513.277972 | 257.142624 | <b>4</b> |
| 8  | <b>932.472375</b>  | 466.739826 | 915.445826  | 458.226551 | 914.461810        | 457.734543 | <b>E</b> | <b>403.229959</b> | 202.118618        | 386.203410 | 193.605343        | 385.219394 | 193.113335 | <b>3</b> |
| 9  | <b>1031.540789</b> | 516.274033 | 1014.514240 | 507.760758 | 1013.530224       | 507.268750 | <b>V</b> | <b>274.187366</b> | 137.597321        | 257.160817 | 129.084047        |            |            | <b>2</b> |
| 10 |                    |            |             |            |                   |            | <b>R</b> | <b>175.118952</b> | 88.063114         | 158.092403 | 79.549839         |            |            | <b>1</b> |

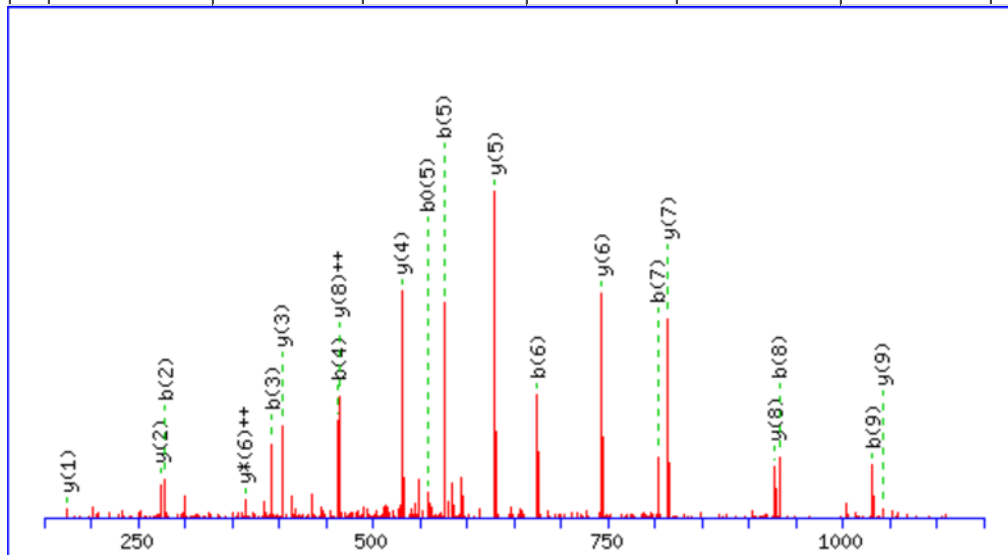

## Peptide View

MS/MS Fragmentation of **WADAECEEIPGR**

Found in **IPI00027436**, Tax\_Id=9606 Gene\_Symbol=NGFR Tumor necrosis factor receptor superfamily member 16

**Experiment:** 54 - PyC-3 **Fraction:** PyC-3

Match to Query 9738: 1431.608048 from(716.811300,2+)

Title: OECHL100317\_09.11262.11262.2.dta

Data file \\Boromir\masse\Data LTQ-Orbitrap\Chrystelle Lacroix\Etude clinique sJPU\OECHL100317\_09.raw

**Monoisotopic mass of neutral peptide Mr(calc):** 1431.608856 **Fixed modifications:** Carbamidomethyl (C) (apply to specified residues or termini only) **Ions Score:** 75

**Expect:** 9e-007**Matches :** 20/98 fragment ions using 36 most intense peaks ([help](#))

| #  | b                  | b <sup>++</sup> | b <sup>0</sup>     | b <sup>0++</sup> | Seq. | y                  | y <sup>++</sup> | y*          | y <sup>*++</sup> | y <sup>0</sup> | y <sup>0++</sup> | #  |
|----|--------------------|-----------------|--------------------|------------------|------|--------------------|-----------------|-------------|------------------|----------------|------------------|----|
| 1  | 187.086589         | 94.046932       |                    |                  | W    |                    |                 |             |                  |                |                  | 12 |
| 2  | <b>258.123703</b>  | 129.565490      |                    |                  | A    | <b>1246.536843</b> | 623.772060      | 1229.510294 | 615.258785       | 1228.526278    | 614.766777       | 11 |
| 3  | <b>373.150646</b>  | 187.078961      | 355.140081         | 178.073679       | D    | <b>1175.499729</b> | 588.253502      | 1158.473180 | 579.740228       | 1157.489164    | 579.248220       | 10 |
| 4  | <b>444.187760</b>  | 222.597518      | 426.177195         | 213.592236       | A    | <b>1060.472786</b> | 530.740031      | 1043.446237 | 522.226757       | 1042.462221    | 521.734749       | 9  |
| 5  | <b>573.230353</b>  | 287.118815      | <b>555.219788</b>  | 278.113532       | E    | <b>989.435672</b>  | 495.221474      | 972.409123  | 486.708199       | 971.425107     | 486.216191       | 8  |
| 6  | 733.261002         | 367.134139      | 715.250437         | 358.128857       | C    | <b>860.393079</b>  | 430.700178      | 843.366530  | 422.186903       | 842.382514     | 421.694895       | 7  |
| 7  | <b>862.303595</b>  | 431.655436      | 844.293030         | 422.650153       | E    | <b>700.362430</b>  | 350.684853      | 683.335881  | 342.171578       | 682.351865     | 341.679570       | 6  |
| 8  | <b>991.346188</b>  | 496.176732      | 973.335623         | 487.171450       | E    | <b>571.319837</b>  | 286.163556      | 554.293288  | 277.650282       | 553.309272     | 277.158274       | 5  |
| 9  | <b>1104.430252</b> | 552.718764      | <b>1086.419687</b> | 543.713482       | I    | <b>442.277244</b>  | 221.642260      | 425.250695  | 213.128985       |                |                  | 4  |
| 10 | <b>1201.483016</b> | 601.245146      | 1183.472451        | 592.239864       | P    | <b>329.193180</b>  | 165.100228      | 312.166631  | 156.586953       |                |                  | 3  |
| 11 | 1258.504480        | 629.755878      | 1240.493915        | 620.750596       | G    | <b>232.140416</b>  | 116.573846      | 215.113867  | 108.060571       |                |                  | 2  |
| 12 |                    |                 |                    |                  | R    | 175.118952         | 88.063114       | 158.092403  | 79.549839        |                |                  | 1  |

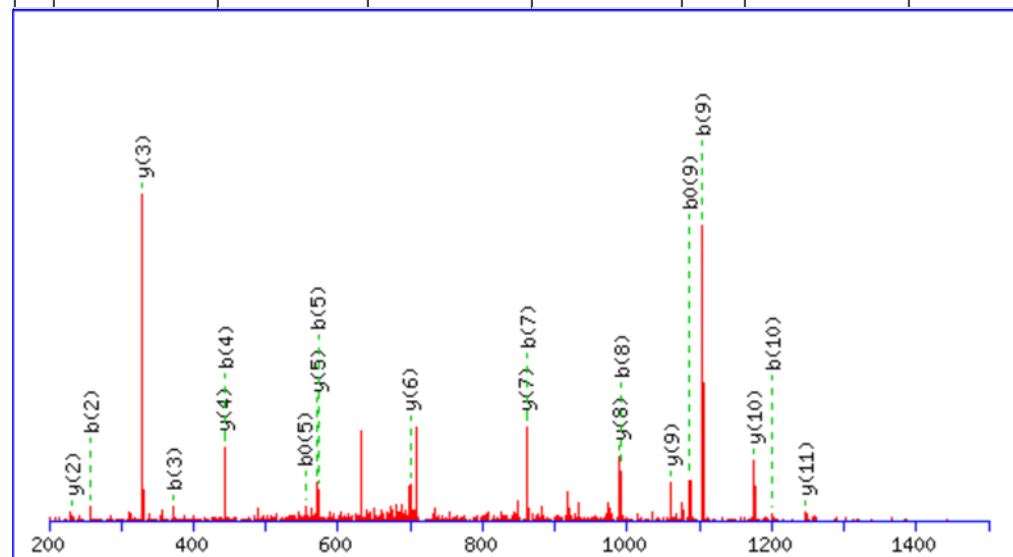

**Peptide View**

MS/MS Fragmentation of **NPVLQQDAHSSVTTPQR**Found in **IPI00410488**, Tax\_Id=9606 Gene\_Symbol=CD276 Isoform 1 of CD276 antigen**Experiment:** 54 - PyC-3 **Fraction:** PyC-3

Match to Query 15353: 1990.022248 from(996.018400,2+)

Title: OECHL100317\_09.10055.10055.2.dta

Data file \\Boromir\masse\Data LTQ-Orbitrap\Chrystelle Lacroix\Etude clinique sJPU\OECHL100317\_09.raw

**Monoisotopic mass of neutral peptide Mr(calc):** 1990.023209 **Fixed modifications:** Carbamidomethyl (C) (apply to specified residues or termini only) **Ions Score:** 84**Expect:** 5.9e-007 **Matches :** 40/186 fragment ions using 68 most intense peaks ([help](#))

| #  | b                  | b <sup>++</sup>   | b*                 | b <sup>*++</sup>  | b <sup>0</sup>     | b <sup>0++</sup>  | Seq. | y                  | y <sup>++</sup>   | y*                | y <sup>*++</sup>  | y <sup>0</sup> | y <sup>0++</sup>  | #  |
|----|--------------------|-------------------|--------------------|-------------------|--------------------|-------------------|------|--------------------|-------------------|-------------------|-------------------|----------------|-------------------|----|
| 1  | 115.050203         | 58.028740         | 98.023654          | 49.515465         |                    |                   | N    |                    |                   |                   |                   |                |                   | 18 |
| 2  | 212.102967         | 106.555121        | 195.076418         | 98.041847         |                    |                   | P    | 1876.987553        | 938.997415        | 1859.961004       | 930.484140        | 1858.976988    | 929.992132        | 17 |
| 3  | <b>311.171381</b>  | 156.089328        | <b>294.144832</b>  | 147.576054        |                    |                   | V    | <b>1779.934789</b> | <b>890.471033</b> | 1762.908240       | 881.957758        | 1761.924224    | 881.465750        | 16 |
| 4  | <b>424.255445</b>  | 212.631361        | 407.228896         | 204.118086        |                    |                   | L    | <b>1680.866375</b> | <b>840.936826</b> | 1663.839826       | <b>832.423551</b> | 1662.855810    | <b>831.931543</b> | 15 |
| 5  | <b>552.314023</b>  | 276.660650        | <b>535.287474</b>  | 268.147375        |                    |                   | Q    | <b>1567.782311</b> | 784.394794        | 1550.755762       | 775.881519        | 1549.771746    | 775.389511        | 14 |
| 6  | 680.372601         | 340.689939        | 663.346052         | 332.176664        |                    |                   | Q    | <b>1439.723733</b> | 720.365505        | 1422.697184       | 711.852230        | 1421.713168    | 711.360222        | 13 |
| 7  | <b>795.399544</b>  | 398.203410        | 778.372995         | 389.690136        | 777.388979         | 389.198128        | D    | <b>1311.665155</b> | 656.336215        | 1294.638606       | 647.822941        | 1293.654590    | 647.330933        | 12 |
| 8  | 866.436658         | 433.721967        | 849.410109         | 425.208693        | 848.426093         | <b>424.716685</b> | A    | <b>1196.638212</b> | 598.822744        | 1179.611663       | 590.309470        | 1178.627647    | 589.817462        | 11 |
| 9  | 1003.495570        | <b>502.251423</b> | 986.469021         | 493.738149        | 985.485005         | 493.246141        | H    | <b>1125.601098</b> | 563.304187        | 1108.574549       | 554.790913        | 1107.590533    | 554.298905        | 10 |
| 10 | <b>1090.527598</b> | 545.767437        | 1073.501049        | 537.254163        | 1072.517033        | 536.762155        | S    | <b>988.542186</b>  | 494.774731        | 971.515637        | 486.261457        | 970.531621     | 485.769449        | 9  |
| 11 | <b>1177.559626</b> | 589.283451        | 1160.533077        | 580.770177        | 1159.549061        | 580.278169        | S    | <b>901.510158</b>  | 451.258717        | 884.483609        | 442.745443        | 883.499593     | 442.253435        | 8  |
| 12 | <b>1276.628040</b> | 638.817658        | 1259.601491        | 630.304384        | <b>1258.617475</b> | 629.812376        | V    | 814.478130         | 407.742703        | 797.451581        | 399.229428        | 796.467565     | 398.737420        | 7  |
| 13 | 1377.675719        | 689.341498        | 1360.649170        | <b>680.828223</b> | <b>1359.665154</b> | 680.336215        | T    | <b>715.409716</b>  | 358.208496        | 698.383167        | 349.695221        | 697.399151     | 349.203213        | 6  |
| 14 | <b>1490.759783</b> | 745.883530        | <b>1473.733234</b> | 737.370255        | <b>1472.749218</b> | 736.878247        | I    | <b>614.362037</b>  | 307.684656        | 597.335488        | 299.171382        | 596.351472     | 298.679374        | 5  |
| 15 | <b>1591.807462</b> | 796.407369        | 1574.780913        | 787.894095        | <b>1573.796897</b> | 787.402087        | T    | <b>501.277973</b>  | 251.142624        | 484.251424        | 242.629350        | 483.267408     | 242.137342        | 4  |
| 16 | 1688.860226        | 844.933751        | 1671.833677        | 836.420477        | 1670.849661        | 835.928469        | P    | <b>400.230294</b>  | 200.618785        | <b>383.203745</b> | 192.105510        |                |                   | 3  |
| 17 | <b>1816.918804</b> | 908.963040        | 1799.892255        | 900.449766        | <b>1798.908239</b> | 899.957758        | Q    | 303.177530         | 152.092403        | 286.150981        | 143.579128        |                |                   | 2  |
| 18 |                    |                   |                    |                   |                    |                   | R    | 175.118952         | 88.063114         | 158.092403        | 79.549839         |                |                   | 1  |

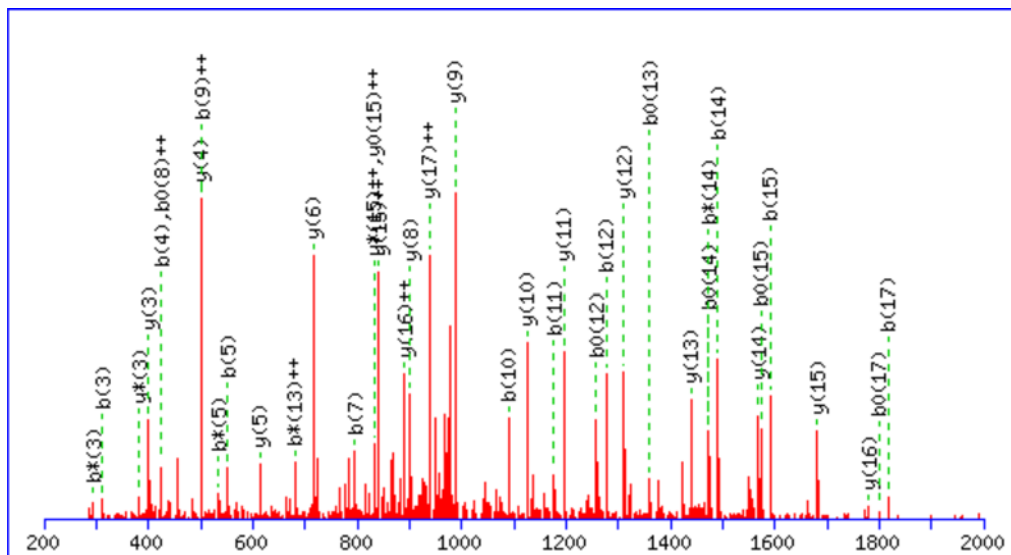

## Peptide View

MS/MS Fragmentation of **SYELTQPPSVSVSPGQ TAR**

Found in **IPI00382440**, Tax\_Id=9606 Gene\_Symbol=- Ig lambda chain V-IV region Hil

**Experiment:** 54 - PyC-3 **Fraction:** PyC-3

Match to Query 15401: 2002.995448 from(1002.505000,2+)

Title: OECHL100317\_09.13369.13369.2.dta

Data file \\Boromir\masse\Data LTQ-Orbitrap\Chrystelle Lacroix\Etude clinique sJPU\OECHL100317\_09.raw

**Monoisotopic mass of neutral peptide Mr(calc):** 2002.995987 **Fixed modifications:** Carbamidomethyl (C) (apply to specified residues or termini only) **Ions Score:** 64

**Expect:** 7.5e-005 **Matches :** 34/202 fragment ions using 48 most intense peaks ([help](#))

| # | b          | b <sup>++</sup> | b <sup>*</sup> | b <sup>*++</sup> | b <sup>0</sup> | b <sup>0++</sup> | Seq. | y           | y <sup>++</sup> | y <sup>*</sup> | y <sup>*++</sup> | y <sup>0</sup> | y <sup>0++</sup> | #  |
|---|------------|-----------------|----------------|------------------|----------------|------------------|------|-------------|-----------------|----------------|------------------|----------------|------------------|----|
| 1 | 88.039304  | 44.523290       |                |                  | 70.028739      | 35.518008        | S    |             |                 |                |                  |                |                  | 19 |
| 2 | 251.102633 | 126.054954      |                |                  | 233.092068     | 117.049672       | Y    | 1916.971234 | 958.989255      | 1899.944685    | 950.475981       | 1898.960669    | 949.983973       | 18 |
| 3 | 380.145226 | 190.576251      |                |                  | 362.134661     | 181.570969       | E    | 1753.907905 | 877.457591      | 1736.881356    | 868.944316       | 1735.897340    | 868.452308       | 17 |
| 4 | 493.229290 | 247.118283      |                |                  | 475.218725     | 238.113001       | L    | 1624.865312 | 812.936294      | 1607.838763    | 804.423020       | 1606.854747    | 803.931012       | 16 |
| 5 | 594.276969 | 297.642123      |                |                  | 576.266404     | 288.636840       | T    | 1511.781248 | 756.394262      | 1494.754699    | 747.880988       | 1493.770683    | 747.388980       | 15 |
| 6 | 722.335547 | 361.671412      | 705.308998     | 353.158137       | 704.324982     | 352.666129       | Q    | 1410.733569 | 705.870423      | 1393.707020    | 697.357148       | 1392.723004    | 696.865140       | 14 |

|    |                    |            |                    |                   |                    |                   |   |                    |                   |                   |                   |             |            |           |
|----|--------------------|------------|--------------------|-------------------|--------------------|-------------------|---|--------------------|-------------------|-------------------|-------------------|-------------|------------|-----------|
| 7  | 819.388311         | 410.197794 | 802.361762         | 401.684519        | 801.377746         | 401.192511        | P | <b>1282.674991</b> | <b>641.841134</b> | 1265.648442       | 633.327859        | 1264.664426 | 632.835851 | <b>13</b> |
| 8  | 916.441075         | 458.724176 | 899.414526         | 450.210901        | 898.430510         | 449.718893        | P | <b>1185.622227</b> | 593.314752        | 1168.595678       | 584.801477        | 1167.611662 | 584.309469 | <b>12</b> |
| 9  | 1003.473103        | 502.240190 | 986.446554         | <b>493.726915</b> | <b>985.462538</b>  | <b>493.234907</b> | S | 1088.569463        | 544.788370        | 1071.542914       | 536.275095        | 1070.558898 | 535.783087 | <b>11</b> |
| 10 | <b>1102.541517</b> | 551.774397 | <b>1085.514968</b> | 543.261122        | 1084.530952        | 542.769114        | V | 1001.537435        | 501.272356        | <b>984.510886</b> | <b>492.759081</b> | 983.526870  | 492.267073 | <b>10</b> |
| 11 | 1189.573545        | 595.290411 | 1172.546996        | 586.777136        | 1171.562980        | 586.285128        | S | <b>902.469021</b>  | 451.738149        | 885.442472        | 443.224874        | 884.458456  | 442.732866 | <b>9</b>  |
| 12 | 1288.641959        | 644.824618 | 1271.615410        | 636.311343        | <b>1270.631394</b> | 635.819335        | V | <b>815.436993</b>  | 408.222135        | 798.410444        | 399.708860        | 797.426428  | 399.216852 | <b>8</b>  |
| 13 | 1375.673987        | 688.340632 | 1358.647438        | 679.827357        | 1357.663422        | 679.335349        | S | <b>716.368579</b>  | 358.687928        | 699.342030        | 350.174653        | 698.358014  | 349.682645 | <b>7</b>  |
| 14 | 1472.726751        | 736.867014 | 1455.700202        | 728.353739        | 1454.716186        | 727.861731        | P | <b>629.336551</b>  | 315.171914        | 612.310002        | 306.658639        | 611.325986  | 306.166631 | <b>6</b>  |
| 15 | 1529.748215        | 765.377746 | <b>1512.721666</b> | 756.864471        | <b>1511.737650</b> | 756.372463        | G | 532.283787         | 266.645532        | 515.257238        | 258.132257        | 514.273222  | 257.640249 | <b>5</b>  |
| 16 | <b>1657.806793</b> | 829.407035 | 1640.780244        | 820.893760        | 1639.796228        | 820.401752        | Q | <b>475.262323</b>  | 238.134800        | 458.235774        | 229.621525        | 457.251758  | 229.129517 | <b>4</b>  |
| 17 | <b>1758.854472</b> | 879.930874 | 1741.827923        | 871.417600        | 1740.843907        | 870.925592        | T | 347.203745         | 174.105510        | 330.177196        | 165.592236        | 329.193180  | 165.100228 | <b>3</b>  |
| 18 | <b>1829.891586</b> | 915.449431 | 1812.865037        | 906.936157        | <b>1811.881021</b> | 906.444149        | A | 246.156066         | 123.581671        | 229.129517        | 115.068396        |             |            | <b>2</b>  |
| 19 |                    |            |                    |                   |                    |                   | R | 175.118952         | 88.063114         | 158.092403        | 79.549839         |             |            | <b>1</b>  |

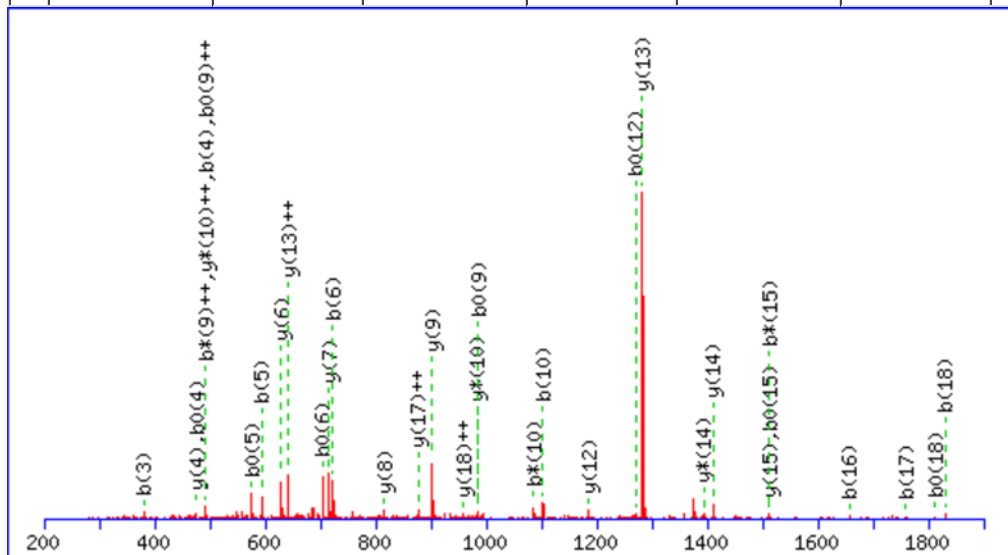

## Peptide View

MS/MS Fragmentation of **YSGSEGSTQTLTKGELK**

Found in **IPI00017526**, Tax\_Id=9606 Gene\_Symbol=S100P Protein S100-P**Experiment:** 54 - PyC-3 **Fraction:** PyC-3

Match to Query 14027: 1784.879848 from(893.447200,2+)

Title: OECHL100317\_09.8083.8083.2.dta

Data file \\Boromir\masse\Data LTQ-Orbitrap\Chrystelle Lacroix\Etude clinique sJPU\OECHL100317\_09.raw

**Monoisotopic mass of neutral peptide Mr(calc):** 1784.879211 **Fixed modifications:** Carbamidomethyl (C) (apply to specified residues or termini only) **Ions Score:** 83**Expect:** 8.1e-007 **Matches :** 26/170 fragment ions using 44 most intense peaks ([help](#))

| #  | b                  | b <sup>++</sup> | b*                 | b <sup>***</sup>  | b <sup>0</sup>    | b <sup>0++</sup> | Seq. | y                  | y <sup>++</sup>   | y*                 | y <sup>***</sup> | y <sup>0</sup>     | y <sup>0++</sup>  | #  |
|----|--------------------|-----------------|--------------------|-------------------|-------------------|------------------|------|--------------------|-------------------|--------------------|------------------|--------------------|-------------------|----|
| 1  | 164.070605         | 82.538940       |                    |                   |                   |                  | Y    |                    |                   |                    |                  |                    |                   | 17 |
| 2  | 251.102633         | 126.054954      |                    |                   | 233.092068        | 117.049672       | S    | <b>1622.823172</b> | <b>811.915224</b> | 1605.796623        | 803.401950       | 1604.812607        | 802.909941        | 16 |
| 3  | 308.124097         | 154.565687      |                    |                   | 290.113532        | 145.560404       | G    | <b>1535.791144</b> | <b>768.399210</b> | 1518.764595        | 759.885936       | 1517.780579        | 759.393928        | 15 |
| 4  | 395.156125         | 198.081701      |                    |                   | 377.145560        | 189.076418       | S    | 1478.769680        | 739.888478        | 1461.743131        | 731.375204       | 1460.759115        | 730.883195        | 14 |
| 5  | <b>524.198718</b>  | 262.602997      |                    |                   | <b>506.188153</b> | 253.597715       | E    | <b>1391.737652</b> | 696.372464        | 1374.711103        | 687.859190       | 1373.727087        | 687.367182        | 13 |
| 6  | 581.220182         | 291.113729      |                    |                   | 563.209617        | 282.108447       | G    | <b>1262.695059</b> | <b>631.851167</b> | 1245.668510        | 623.337893       | <b>1244.684494</b> | <b>622.845885</b> | 12 |
| 7  | 668.252210         | 334.629743      |                    |                   | 650.241645        | 325.624461       | S    | <b>1205.673595</b> | 603.340436        | 1188.647046        | 594.827161       | 1187.663030        | 594.335153        | 11 |
| 8  | 769.299889         | 385.153583      |                    |                   | 751.289324        | 376.148300       | T    | <b>1118.641567</b> | 559.824421        | 1101.615018        | 551.311147       | 1100.631002        | 550.819139        | 10 |
| 9  | 897.358467         | 449.182872      | 880.331918         | 440.669597        | 879.347902        | 440.177589       | Q    | <b>1017.593888</b> | 509.300582        | <b>1000.567339</b> | 500.787307       | 999.583323         | 500.295299        | 9  |
| 10 | 998.406146         | 499.706711      | 981.379597         | 491.193437        | 980.395581        | 490.701429       | T    | 889.535310         | 445.271293        | 872.508761         | 436.758018       | 871.524745         | 436.266010        | 8  |
| 11 | 1111.490210        | 556.248743      | 1094.463661        | 547.735469        | 1093.479645       | 547.243461       | L    | <b>788.487631</b>  | 394.747453        | 771.461082         | 386.234179       | 770.477066         | 385.742171        | 7  |
| 12 | 1212.537889        | 606.772583      | 1195.511340        | 598.259308        | 1194.527324       | 597.767300       | T    | <b>675.403567</b>  | 338.205421        | 658.377018         | 329.692147       | 657.393002         | 329.200139        | 6  |
| 13 | 1340.632852        | 670.820064      | 1323.606303        | 662.306790        | 1322.622287       | 661.814782       | K    | <b>574.355888</b>  | 287.681582        | 557.329339         | 279.168307       | 556.345323         | 278.676299        | 5  |
| 14 | <b>1397.654316</b> | 699.330796      | 1380.627767        | 690.817522        | 1379.643751       | 690.325514       | G    | <b>446.260925</b>  | 223.634100        | 429.234376         | 215.120826       | 428.250360         | 214.628818        | 4  |
| 15 | <b>1526.696909</b> | 763.852093      | 1509.670360        | 755.338818        | 1508.686344       | 754.846810       | E    | 389.239461         | 195.123368        | 372.212912         | 186.610094       | <b>371.228896</b>  | 186.118086        | 3  |
| 16 | <b>1639.780973</b> | 820.394124      | <b>1622.754424</b> | <b>811.880850</b> | 1621.770408       | 811.388842       | L    | <b>260.196868</b>  | 130.602072        | 243.170319         | 122.088797       |                    |                   | 2  |
| 17 |                    |                 |                    |                   |                   |                  | K    | 147.112804         | 74.060040         | 130.086255         | 65.546765        |                    |                   | 1  |

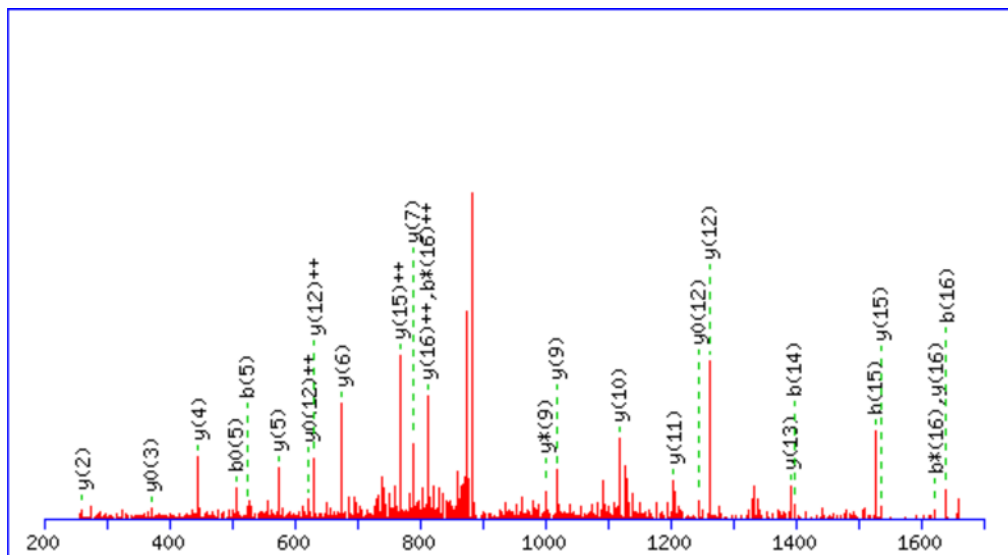

## Peptide View

MS/MS Fragmentation of **LLIYDASNLETGVPSR**

Found in **IP100003111**, Tax\_Id=9606 Gene\_Symbol=LOC652694 Ig kappa chain V-I region AU

**Experiment:** 54 - PyC-3 **Fraction:** PyC-3

Match to Query 13812: 1746.917048 from(874.465800,2+)

Title: OECHL100317\_09.16604.16604.2.dta

Data file \\Boromir\masse\Data LTQ-Orbitrap\Chrystelle Lacroix\Etude clinique sJPU\OECHL100317\_09.raw

**Monoisotopic mass of neutral peptide Mr(calc):** 1746.915192 **Fixed modifications:** Carbamidomethyl (C) (apply to specified residues or termini only) **Ions Score:** 75

**Expect:** 3e-006 **Matches :** 25/156 fragment ions using 42 most intense peaks ([help](#))

| # | b                 | b <sup>++</sup> | b* | b <sup>*++</sup> | b <sup>0</sup> | b <sup>0++</sup> | Seq. | y                  | y <sup>++</sup>   | y*          | y <sup>*++</sup> | y <sup>0</sup>     | y <sup>0++</sup> | #  |
|---|-------------------|-----------------|----|------------------|----------------|------------------|------|--------------------|-------------------|-------------|------------------|--------------------|------------------|----|
| 1 | 114.091340        | 57.549308       |    |                  |                |                  | L    |                    |                   |             |                  |                    |                  | 16 |
| 2 | 227.175404        | 114.091340      |    |                  |                |                  | L    | 1634.838427        | 817.922852        | 1617.811878 | 809.409577       | 1616.827862        | 808.917569       | 15 |
| 3 | 340.259468        | 170.633372      |    |                  |                |                  | I    | <b>1521.754363</b> | <b>761.380820</b> | 1504.727814 | 752.867545       | 1503.743798        | 752.375537       | 14 |
| 4 | 503.322797        | 252.165036      |    |                  |                |                  | Y    | 1408.670299        | 704.838788        | 1391.643750 | 696.325513       | <b>1390.659734</b> | 695.833505       | 13 |
| 5 | 618.349740        | 309.678508      |    |                  | 600.339175     | 300.673226       | D    | <b>1245.606970</b> | 623.307123        | 1228.580421 | 614.793849       | 1227.596405        | 614.301841       | 12 |
| 6 | <b>689.386854</b> | 345.197065      |    |                  | 671.376289     | 336.191782       | A    | <b>1130.580027</b> | 565.793652        | 1113.553478 | 557.280377       | 1112.569462        | 556.788369       | 11 |



|    |                    |                   |                    |            |                    |            |   |                    |            |                   |            |                   |            |           |
|----|--------------------|-------------------|--------------------|------------|--------------------|------------|---|--------------------|------------|-------------------|------------|-------------------|------------|-----------|
| 7  | 776.418882         | 388.713079        |                    |            | 758.408317         | 379.707796 | S | <b>1059.542913</b> | 530.275095 | 1042.516364       | 521.761820 | 1041.532348       | 521.269812 | <b>10</b> |
| 8  | 890.461809         | 445.734542        | 873.435260         | 437.221268 | 872.451244         | 436.729260 | N | <b>972.510885</b>  | 486.759081 | 955.484336        | 478.245806 | 954.500320        | 477.753798 | <b>9</b>  |
| 9  | <b>1003.545873</b> | 502.276574        | 986.519324         | 493.763300 | 985.535308         | 493.271292 | L | <b>858.467958</b>  | 429.737617 | 841.441409        | 421.224343 | 840.457393        | 420.732335 | <b>8</b>  |
| 10 | <b>1132.588466</b> | 566.797871        | 1115.561917        | 558.284597 | 1114.577901        | 557.792588 | E | <b>745.383894</b>  | 373.195585 | 728.357345        | 364.682311 | 727.373329        | 364.190303 | <b>7</b>  |
| 11 | 1233.636145        | <b>617.321710</b> | 1216.609596        | 608.808436 | 1215.625580        | 608.316428 | T | <b>616.341301</b>  | 308.674289 | 599.314752        | 300.161014 | 598.330736        | 299.669006 | <b>6</b>  |
| 12 | <b>1290.657609</b> | 645.832442        | 1273.631060        | 637.319168 | 1272.647044        | 636.827160 | G | <b>515.293622</b>  | 258.150449 | 498.267073        | 249.637175 | 497.283057        | 249.145167 | <b>5</b>  |
| 13 | <b>1389.726023</b> | 695.366649        | <b>1372.699474</b> | 686.853375 | 1371.715458        | 686.361367 | V | <b>458.272158</b>  | 229.639717 | 441.245609        | 221.126443 | 440.261593        | 220.634435 | <b>4</b>  |
| 14 | <b>1486.778787</b> | 743.893032        | 1469.752238        | 735.379757 | 1468.768222        | 734.887749 | P | <b>359.203744</b>  | 180.105510 | <b>342.177195</b> | 171.592236 | <b>341.193179</b> | 171.100228 | <b>3</b>  |
| 15 | <b>1573.810815</b> | 787.409046        | 1556.784266        | 778.895771 | <b>1555.800250</b> | 778.403763 | S | 262.150980         | 131.579128 | 245.124431        | 123.065854 | 244.140415        | 122.573846 | <b>2</b>  |
| 16 |                    |                   |                    |            |                    |            | R | 175.118952         | 88.063114  | 158.092403        | 79.549839  |                   |            | <b>1</b>  |

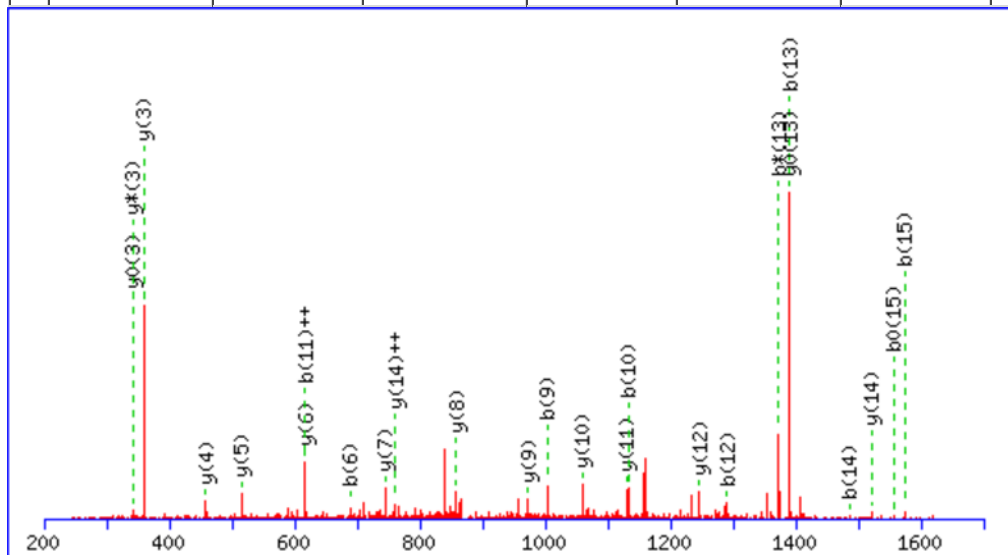

## Peptide View

MS/MS Fragmentation of **GAVSQTYPSTGTCAYIQR**

Found in **IP100001759**, Tax\_Id=9606 Gene\_Symbol=OLR1 Oxidized low-density lipoprotein receptor 1

**Experiment:** 54 - PyC-3 **Fraction:** PyC-3

Match to Query 14502: 1857.869448 from(929.942000,2+)

Title: OECHL100317\_09.11160.11160.2.dta

Data file \\Boromir\masse\Data LTQ-Orbitrap\Chrystelle Lacroix\Etude clinique sJPU\OECHL100317\_09.raw

**Monoisotopic mass of neutral peptide Mr(calc):** 1857.867950**Fixed modifications:** Carbamidomethyl (C) (apply to specified residues or termini only)**Ions Score:** 73**Expect:** 6e-006**Matches :** 36/166 fragment ions using 76 most intense peaks ([help](#))

| #  | b           | b <sup>++</sup> | b*          | b <sup>*++</sup> | b <sup>0</sup> | b <sup>0++</sup> | Seq. | y           | y <sup>++</sup> | y*          | y <sup>*++</sup> | y <sup>0</sup> | y <sup>0++</sup> | #  |
|----|-------------|-----------------|-------------|------------------|----------------|------------------|------|-------------|-----------------|-------------|------------------|----------------|------------------|----|
| 1  | 58.028740   | 29.518008       |             |                  |                |                  | G    |             |                 |             |                  |                |                  | 17 |
| 2  | 129.065854  | 65.036565       |             |                  |                |                  | A    | 1801.853763 | 901.430520      | 1784.827214 | 892.917245       | 1783.843198    | 892.425237       | 16 |
| 3  | 228.134268  | 114.570772      |             |                  |                |                  | V    | 1730.816649 | 865.911963      | 1713.790100 | 857.398688       | 1712.806084    | 856.906680       | 15 |
| 4  | 315.166296  | 158.086786      |             |                  | 297.155731     | 149.081504       | S    | 1631.748235 | 816.377756      | 1614.721686 | 807.864481       | 1613.737670    | 807.372473       | 14 |
| 5  | 443.224874  | 222.116075      | 426.198325  | 213.602801       | 425.214309     | 213.110793       | Q    | 1544.716207 | 772.861742      | 1527.689658 | 764.348467       | 1526.705642    | 763.856459       | 13 |
| 6  | 544.272553  | 272.639915      | 527.246004  | 264.126640       | 526.261988     | 263.634632       | T    | 1416.657629 | 708.832453      | 1399.631080 | 700.319178       | 1398.647064    | 699.827170       | 12 |
| 7  | 707.335882  | 354.171579      | 690.309333  | 345.658305       | 689.325317     | 345.166297       | Y    | 1315.609950 | 658.308613      | 1298.583401 | 649.795339       | 1297.599385    | 649.303331       | 11 |
| 8  | 804.388646  | 402.697961      | 787.362097  | 394.184687       | 786.378081     | 393.692679       | P    | 1152.546621 | 576.776949      | 1135.520072 | 568.263674       | 1134.536056    | 567.771666       | 10 |
| 9  | 891.420674  | 446.213975      | 874.394125  | 437.700701       | 873.410109     | 437.208693       | S    | 1055.493857 | 528.250567      | 1038.467308 | 519.737292       | 1037.483292    | 519.245284       | 9  |
| 10 | 948.442138  | 474.724707      | 931.415589  | 466.211433       | 930.431573     | 465.719425       | G    | 968.461829  | 484.734553      | 951.435280  | 476.221278       | 950.451264     | 475.729270       | 8  |
| 11 | 1049.489817 | 525.248547      | 1032.463268 | 516.735272       | 1031.479252    | 516.243264       | T    | 911.440365  | 456.223821      | 894.413816  | 447.710546       | 893.429800     | 447.218538       | 7  |
| 12 | 1209.520466 | 605.263871      | 1192.493917 | 596.750597       | 1191.509901    | 596.258589       | C    | 810.392686  | 405.699981      | 793.366137  | 397.186707       |                |                  | 6  |
| 13 | 1280.557580 | 640.782428      | 1263.531031 | 632.269154       | 1262.547015    | 631.777146       | A    | 650.362037  | 325.684657      | 633.335488  | 317.171382       |                |                  | 5  |
| 14 | 1443.620909 | 722.314093      | 1426.594360 | 713.800818       | 1425.610344    | 713.308810       | Y    | 579.324923  | 290.166100      | 562.298374  | 281.652825       |                |                  | 4  |
| 15 | 1556.704973 | 778.856125      | 1539.678424 | 770.342850       | 1538.694408    | 769.850842       | I    | 416.261594  | 208.634435      | 399.235045  | 200.121160       |                |                  | 3  |
| 16 | 1684.763551 | 842.885414      | 1667.737002 | 834.372139       | 1666.752986    | 833.880131       | Q    | 303.177530  | 152.092403      | 286.150981  | 143.579129       |                |                  | 2  |
| 17 |             |                 |             |                  |                |                  | R    | 175.118952  | 88.063114       | 158.092403  | 79.549839        |                |                  | 1  |

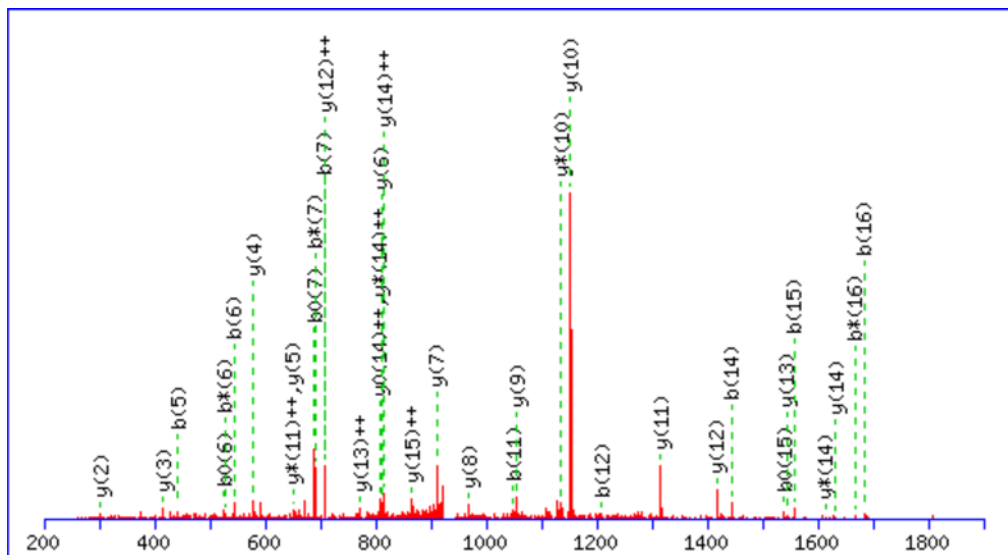

## Peptide View

MS/MS Fragmentation of **KAGPCEQAGSPCR**

Found in **IPI00028381**, Tax\_Id=9606 Gene\_Symbol=DLK2 Isoform 1 of Protein delta homolog 2

**Experiment:** 54 - PyC-3 **Fraction:** PyC-3

Match to Query 9641: 1416.625048 from(709.319800,2+)

Title: OECHL100317\_09.2298.2298.2.dta

Data file \\Boromir\masse\Data LTQ-Orbitrap\Chrystelle Lacroix\Etude clinique sJPU\OECHL100317\_09.raw

**Monoisotopic mass of neutral peptide Mr(calc):** 1416.623810 **Fixed modifications:** Carbamidomethyl (C) (apply to specified residues or termini only) **Ions Score:** 69

**Expect:** 7.6e-006 **Matches :** 22/128 fragment ions using 39 most intense peaks ([help](#))

| # | b          | b <sup>++</sup>   | b <sup>*</sup> | b <sup>*++</sup> | b <sup>0</sup> | b <sup>0++</sup> | Seq.     | y                  | y <sup>++</sup>   | y <sup>*</sup>     | y <sup>*++</sup> | y <sup>0</sup> | y <sup>0++</sup> | #         |
|---|------------|-------------------|----------------|------------------|----------------|------------------|----------|--------------------|-------------------|--------------------|------------------|----------------|------------------|-----------|
| 1 | 129.102239 | 65.054757         | 112.075690     | 56.541483        |                |                  | <b>K</b> |                    |                   |                    |                  |                |                  | <b>13</b> |
| 2 | 200.139353 | 100.573315        | 183.112804     | 92.060040        |                |                  | <b>A</b> | <b>1289.536133</b> | 645.271705        | 1272.509584        | 636.758430       | 1271.525568    | 636.266422       | <b>12</b> |
| 3 | 257.160817 | 129.084047        | 240.134268     | 120.570772       |                |                  | <b>G</b> | <b>1218.499019</b> | <b>609.753148</b> | 1201.472470        | 601.239873       | 1200.488454    | 600.747865       | <b>11</b> |
| 4 | 354.213581 | 177.610429        | 337.187032     | 169.097154       |                |                  | <b>P</b> | <b>1161.477555</b> | <b>581.242416</b> | <b>1144.451006</b> | 572.729141       | 1143.466990    | 572.237133       | <b>10</b> |
| 5 | 514.244230 | <b>257.625753</b> | 497.217681     | 249.112479       |                |                  | <b>C</b> | <b>1064.424791</b> | 532.716034        | <b>1047.398242</b> | 524.202759       | 1046.414226    | 523.710751       | <b>9</b>  |
| 6 | 643.286823 | 322.147050        | 626.260274     | 313.633775       | 625.276258     | 313.141767       | <b>E</b> | <b>904.394142</b>  | 452.700709        | 887.367593         | 444.187434       | 886.383577     | 443.695427       | <b>8</b>  |

|    |             |            |             |            |             |            |   |            |            |            |            |            |            |   |
|----|-------------|------------|-------------|------------|-------------|------------|---|------------|------------|------------|------------|------------|------------|---|
| 7  | 771.345401  | 386.176339 | 754.318852  | 377.663064 | 753.334836  | 377.171056 | Q | 775.351549 | 388.179413 | 758.325000 | 379.666138 | 757.340984 | 379.174130 | 7 |
| 8  | 842.382515  | 421.694896 | 825.355966  | 413.181621 | 824.371950  | 412.689613 | A | 647.292971 | 324.150124 | 630.266422 | 315.636849 | 629.282406 | 315.144841 | 6 |
| 9  | 899.403979  | 450.205628 | 882.377430  | 441.692353 | 881.393414  | 441.200345 | G | 576.255857 | 288.631567 | 559.229308 | 280.118292 | 558.245292 | 279.626284 | 5 |
| 10 | 986.436007  | 493.721642 | 969.409458  | 485.208367 | 968.425442  | 484.716359 | S | 519.234393 | 260.120835 | 502.207844 | 251.607560 | 501.223828 | 251.115552 | 4 |
| 11 | 1083.488771 | 542.248024 | 1066.462222 | 533.734749 | 1065.478206 | 533.242741 | P | 432.202365 | 216.604820 | 415.175816 | 208.091546 |            |            | 3 |
| 12 | 1243.519420 | 622.263348 | 1226.492871 | 613.750074 | 1225.508855 | 613.258066 | C | 335.149601 | 168.078438 | 318.123052 | 159.565164 |            |            | 2 |
| 13 |             |            |             |            |             |            | R | 175.118952 | 88.063114  | 158.092403 | 79.549839  |            |            | 1 |

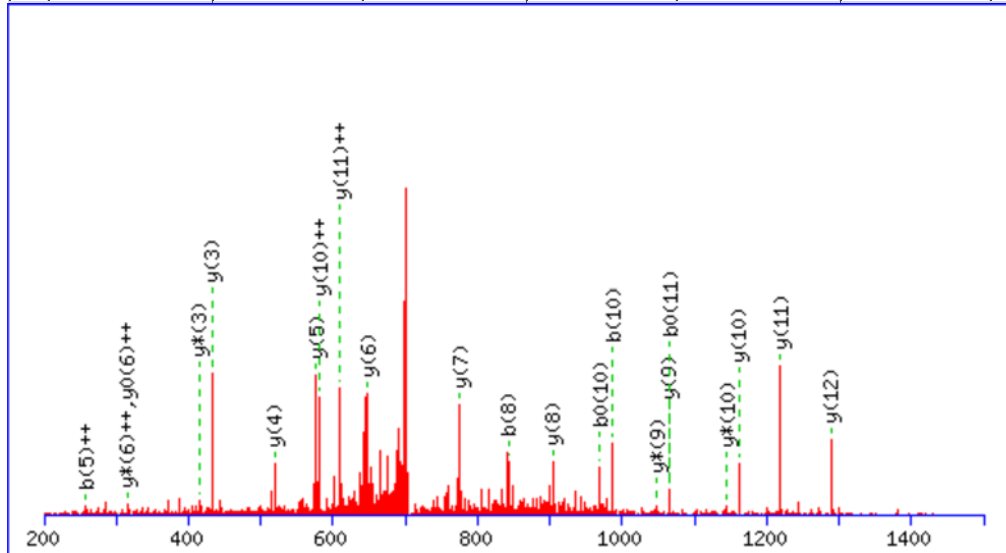

## Peptide View

MS/MS Fragmentation of **AISSIGLECQSVTSR**

Found in **IPI00006988**, Tax\_Id=9606 Gene\_Symbol=RETN Resistin

**Experiment:** 54 - PyC-3 **Fraction:** PyC-3

Match to Query 12060: 1606.799248 from(804.406900,2+)

Title: OECHL100317\_09.12112.12112.2.dta

Data file \\Boromir\masse\Data LTQ-Orbitrap\Chrystelle Lacroix\Etude clinique sJPU\OECHL100317\_09.raw

**Monoisotopic mass of neutral peptide Mr(calc):** 1606.798462 **Fixed modifications:** Carbamidomethyl (C) (apply to specified residues or termini only) **Ions Score:** 69

**Expect:** 2e-005 **Matches :** 45/144 fragment ions using 91 most intense peaks ([help](#))

| #  | <b>b</b>           | <b>b<sup>++</sup></b> | <b>b*</b>          | <b>b<sup>*++</sup></b> | <b>b<sup>0</sup></b> | <b>b<sup>0++</sup></b> | Seq.     | <b>y</b>           | <b>y<sup>++</sup></b> | <b>y*</b>         | <b>y<sup>*++</sup></b> | <b>y<sup>0</sup></b> | <b>y<sup>0++</sup></b> | #         |
|----|--------------------|-----------------------|--------------------|------------------------|----------------------|------------------------|----------|--------------------|-----------------------|-------------------|------------------------|----------------------|------------------------|-----------|
| 1  | 72.044390          | 36.525833             |                    |                        |                      |                        | <b>A</b> |                    |                       |                   |                        |                      |                        | <b>15</b> |
| 2  | 185.128454         | 93.067865             |                    |                        |                      |                        | <b>I</b> | 1536.768633        | 768.887955            | 1519.742084       | 760.374680             | 1518.758068          | 759.882672             | <b>14</b> |
| 3  | <b>272.160482</b>  | 136.583879            |                    |                        | 254.149917           | 127.578596             | <b>S</b> | 1423.684569        | <b>712.345923</b>     | 1406.658020       | 703.832648             | 1405.674004          | 703.340640             | <b>13</b> |
| 4  | <b>359.192510</b>  | 180.099893            |                    |                        | <b>341.181945</b>    | 171.094610             | <b>S</b> | <b>1336.652541</b> | <b>668.829909</b>     | 1319.625992       | 660.316634             | 1318.641976          | <b>659.824626</b>      | <b>12</b> |
| 5  | <b>472.276574</b>  | 236.641925            |                    |                        | <b>454.266009</b>    | 227.636642             | <b>I</b> | <b>1249.620513</b> | <b>625.313895</b>     | 1232.593964       | 616.800620             | 1231.609948          | 616.308612             | <b>11</b> |
| 6  | <b>529.298038</b>  | 265.152657            |                    |                        | <b>511.287473</b>    | 256.147375             | <b>G</b> | <b>1136.536449</b> | 568.771863            | 1119.509900       | 560.258588             | <b>1118.525884</b>   | 559.766580             | <b>10</b> |
| 7  | <b>642.382102</b>  | 321.694689            |                    |                        | <b>624.371537</b>    | 312.689407             | <b>L</b> | <b>1079.514985</b> | 540.261131            | 1062.488436       | 531.747856             | <b>1061.504420</b>   | 531.255848             | <b>9</b>  |
| 8  | <b>771.424695</b>  | 386.215986            |                    |                        | <b>753.414130</b>    | 377.210703             | <b>E</b> | <b>966.430921</b>  | 483.719099            | <b>949.404372</b> | 475.205824             | 948.420356           | 474.713816             | <b>8</b>  |
| 9  | <b>931.455344</b>  | 466.231310            |                    |                        | 913.444779           | 457.226028             | <b>C</b> | <b>837.388328</b>  | 419.197802            | 820.361779        | 410.684528             | 819.377763           | 410.192520             | <b>7</b>  |
| 10 | <b>1059.513922</b> | 530.260599            | 1042.487373        | 521.747325             | 1041.503357          | 521.255317             | <b>Q</b> | <b>677.357679</b>  | 339.182478            | 660.331130        | 330.669203             | <b>659.347114</b>    | 330.177195             | <b>6</b>  |
| 11 | <b>1146.545950</b> | 573.776613            | 1129.519401        | 565.263339             | <b>1128.535385</b>   | 564.771331             | <b>S</b> | <b>549.299101</b>  | 275.153189            | 532.272552        | 266.639914             | 531.288536           | 266.147906             | <b>5</b>  |
| 12 | <b>1245.614364</b> | 623.310820            | <b>1228.587815</b> | <b>614.797546</b>      | <b>1227.603799</b>   | <b>614.305538</b>      | <b>V</b> | <b>462.267073</b>  | 231.637175            | 445.240524        | 223.123900             | <b>444.256508</b>    | 222.631892             | <b>4</b>  |
| 13 | <b>1346.662043</b> | 673.834660            | <b>1329.635494</b> | 665.321385             | <b>1328.651478</b>   | 664.829377             | <b>T</b> | <b>363.198659</b>  | 182.102968            | 346.172110        | 173.589693             | 345.188094           | 173.097685             | <b>3</b>  |
| 14 | <b>1433.694071</b> | 717.350674            | 1416.667522        | 708.837399             | <b>1415.683506</b>   | 708.345391             | <b>S</b> | <b>262.150980</b>  | 131.579128            | 245.124431        | 123.065854             | 244.140415           | 122.573846             | <b>2</b>  |
| 15 |                    |                       |                    |                        |                      |                        | <b>R</b> | 175.118952         | 88.063114             | 158.092403        | 79.549839              |                      |                        | <b>1</b>  |

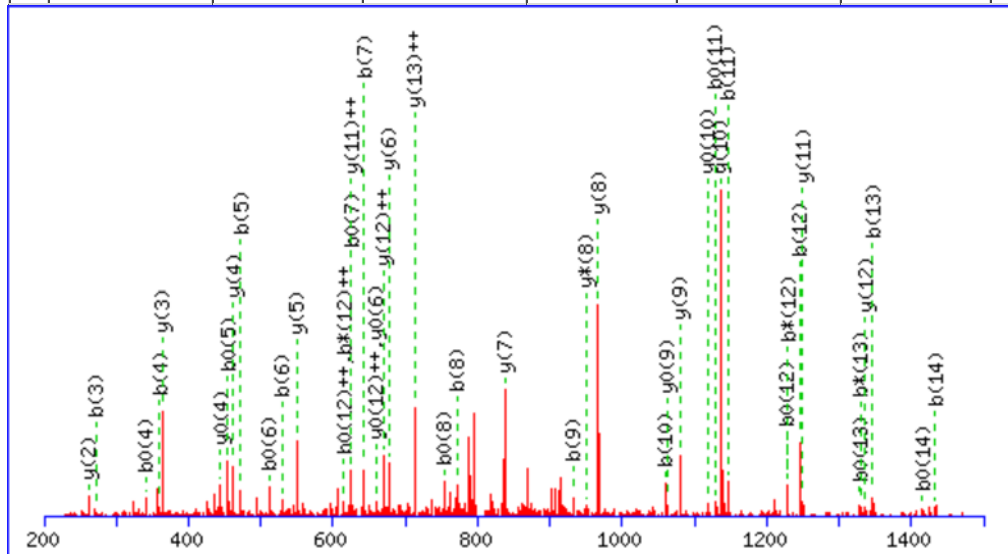

## Peptide View

MS/MS Fragmentation of **VALVTGAAQGIGR**

Found in **IPI00290420**, Tax\_Id=9606 Gene\_Symbol=HPGD hydroxyprostaglandin dehydrogenase 15-(NAD) isoform 2

**Experiment:** 54 - PyC-3 **Fraction:** PyC-3

Match to Query 7361: 1211.698648 from(606.856600,2+)

Title: OECHL100317\_09.11594.11594.2.dta

Data file \\Boromir\masse\Data LTQ-Orbitrap\Chrystelle Lacroix\Etude clinique sJPU\OECHL100317\_09.raw

**Monoisotopic mass of neutral peptide Mr(calc):** 1211.698624 **Fixed modifications:** Carbamidomethyl (C) (apply to specified residues or termini only) **Ions Score:** 66

**Expect:** 1e-005 **Matches :** 24/104 fragment ions using 43 most intense peaks ([help](#))

| #  | b                  | b <sup>++</sup>   | b*          | b <sup>*++</sup> | b <sup>0</sup>    | b <sup>0++</sup> | Seq. | y                  | y <sup>++</sup>   | y*          | y <sup>*++</sup> | y <sup>0</sup> | y <sup>0++</sup> | #  |
|----|--------------------|-------------------|-------------|------------------|-------------------|------------------|------|--------------------|-------------------|-------------|------------------|----------------|------------------|----|
| 1  | 100.075690         | 50.541483         |             |                  |                   |                  | V    |                    |                   |             |                  |                |                  | 13 |
| 2  | 171.112804         | 86.060040         |             |                  |                   |                  | A    | 1113.637485        | 557.322381        | 1096.610936 | 548.809106       | 1095.626920    | 548.317098       | 12 |
| 3  | <b>284.196868</b>  | 142.602072        |             |                  |                   |                  | L    | <b>1042.600371</b> | <b>521.803824</b> | 1025.573822 | 513.290549       | 1024.589806    | 512.798541       | 11 |
| 4  | <b>383.265282</b>  | 192.136279        |             |                  |                   |                  | V    | <b>929.516307</b>  | <b>465.261792</b> | 912.489758  | 456.748517       | 911.505742     | 456.256509       | 10 |
| 5  | <b>484.312961</b>  | 242.660119        |             |                  | <b>466.302396</b> | 233.654836       | T    | <b>830.447893</b>  | 415.727585        | 813.421344  | 407.214310       | 812.437328     | 406.722302       | 9  |
| 6  | <b>541.334425</b>  | <b>271.170851</b> |             |                  | 523.323860        | 262.165568       | G    | <b>729.400214</b>  | 365.203745        | 712.373665  | 356.690471       |                |                  | 8  |
| 7  | 612.371539         | 306.689408        |             |                  | <b>594.360974</b> | 297.684125       | A    | 672.378750         | 336.693013        | 655.352201  | 328.179738       |                |                  | 7  |
| 8  | <b>683.408653</b>  | 342.207965        |             |                  | 665.398088        | 333.202682       | A    | <b>601.341636</b>  | 301.174456        | 584.315087  | 292.661182       |                |                  | 6  |
| 9  | <b>811.467231</b>  | 406.237254        | 794.440682  | 397.723979       | 793.456666        | 397.231971       | Q    | <b>530.304522</b>  | 265.655899        | 513.277973  | 257.142625       |                |                  | 5  |
| 10 | 868.488695         | 434.747986        | 851.462146  | 426.234711       | 850.478130        | 425.742703       | G    | <b>402.245944</b>  | 201.626610        | 385.219395  | 193.113335       |                |                  | 4  |
| 11 | <b>981.572759</b>  | 491.290018        | 964.546210  | 482.776743       | <b>963.562194</b> | 482.284735       | I    | <b>345.224480</b>  | 173.115878        | 328.197931  | 164.602603       |                |                  | 3  |
| 12 | <b>1038.594223</b> | 519.800750        | 1021.567674 | 511.287475       | 1020.583658       | 510.795467       | G    | <b>232.140416</b>  | 116.573846        | 215.113867  | 108.060571       |                |                  | 2  |
| 13 |                    |                   |             |                  |                   |                  | R    | <b>175.118952</b>  | 88.063114         | 158.092403  | 79.549839        |                |                  | 1  |

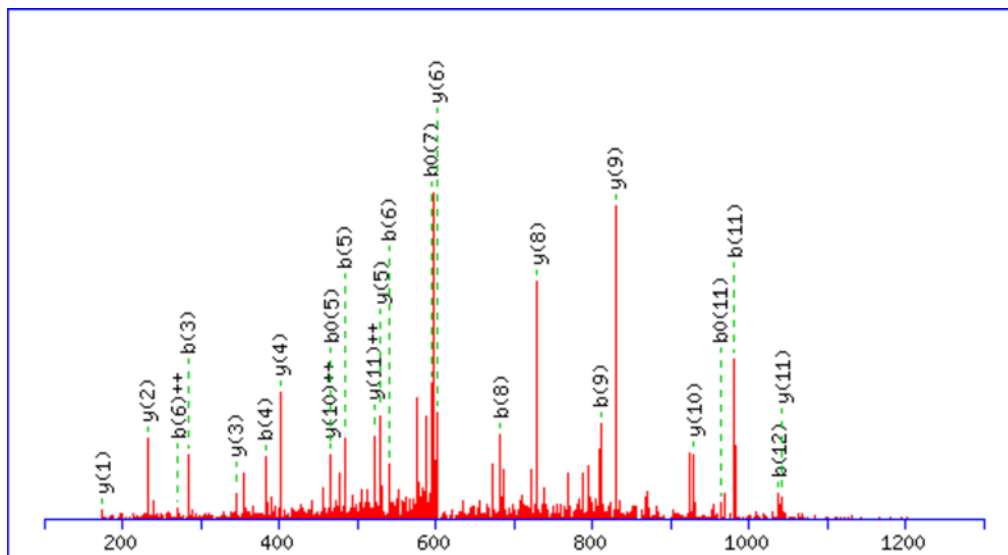

## Peptide View

### MS/MS Fragmentation of **VFLENVIRDAVTYTEHAK**

Found in **IPI00453473**, Tax\_Id=9606 Gene\_Symbol=HIST1H4K;HIST1H4D;HIST4H4;HIST1H4F;HIST1H4E;HIST1H4J;HIST2H4A;HIST1H4B;HIST1H4I;HIST1H4A;HIST1H4L;HIST1H4H;HIST1H4C;HIST2H4B Histone H4

**Experiment:** 54 - PyC-3 **Fraction:** PyC-3

Match to Query 16145: 2104.094772 from(702.372200,3+)

Title: OECHL100317\_09.21757.21757.3.dta

Data file \\Boromir\masse\Data LTQ-Orbitrap\Chrystelle Lacroix\Etude clinique sJPU\OECHL100317\_09.raw

**Monoisotopic mass of neutral peptide Mr(calc):** 2104.095291 **Fixed modifications:** Carbamidomethyl (C) (apply to specified residues or termini only) **Ions Score:** 58

**Expect:** 0.00021 **Matches :** 23/184 fragment ions using 31 most intense peaks ([help](#))

| # | b                 | b <sup>++</sup> | b <sup>*</sup> | b <sup>*++</sup> | b <sup>0</sup> | b <sup>0++</sup> | Seq. | y           | y <sup>++</sup>   | y <sup>*</sup> | y <sup>*++</sup> | y <sup>0</sup> | y <sup>0++</sup> | #  |
|---|-------------------|-----------------|----------------|------------------|----------------|------------------|------|-------------|-------------------|----------------|------------------|----------------|------------------|----|
| 1 | 100.075690        | 50.541483       |                |                  |                |                  | V    |             |                   |                |                  |                |                  | 18 |
| 2 | <b>247.144104</b> | 124.075690      |                |                  |                |                  | F    | 2006.034168 | 1003.520722       | 1989.007619    | 995.007448       | 1988.023603    | 994.515440       | 17 |
| 3 | 360.228168        | 180.617722      |                |                  |                |                  | L    | 1858.965754 | <b>929.986515</b> | 1841.939205    | 921.473241       | 1840.955189    | 920.981233       | 16 |
| 4 | <b>489.270761</b> | 245.139018      |                |                  | 471.260196     | 236.133736       | E    | 1745.881690 | <b>873.444483</b> | 1728.855141    | 864.931209       | 1727.871125    | 864.439201       | 15 |
| 5 | 603.313688        | 302.160482      | 586.287139     | 293.647208       | 585.303123     | 293.155200       | N    | 1616.839097 | 808.923187        | 1599.812548    | 800.409912       | 1598.828532    | 799.917904       | 14 |

|    |             |            |             |            |             |            |   |             |            |             |            |             |            |    |
|----|-------------|------------|-------------|------------|-------------|------------|---|-------------|------------|-------------|------------|-------------|------------|----|
| 6  | 702.382102  | 351.694689 | 685.355553  | 343.181415 | 684.371537  | 342.689407 | V | 1502.796170 | 751.901723 | 1485.769621 | 743.388449 | 1484.785605 | 742.896441 | 13 |
| 7  | 815.466166  | 408.236721 | 798.439617  | 399.723447 | 797.455601  | 399.231439 | I | 1403.727756 | 702.367516 | 1386.701207 | 693.854242 | 1385.717191 | 693.362234 | 12 |
| 8  | 971.567277  | 486.287277 | 954.540728  | 477.774002 | 953.556712  | 477.281994 | R | 1290.643692 | 645.825484 | 1273.617143 | 637.312210 | 1272.633127 | 636.820202 | 11 |
| 9  | 1086.594220 | 543.800748 | 1069.567671 | 535.287474 | 1068.583655 | 534.795466 | D | 1134.542581 | 567.774929 | 1117.516032 | 559.261654 | 1116.532016 | 558.769646 | 10 |
| 10 | 1157.631334 | 579.319305 | 1140.604785 | 570.806031 | 1139.620769 | 570.314023 | A | 1019.515638 | 510.261457 | 1002.489089 | 501.748183 | 1001.505073 | 501.256175 | 9  |
| 11 | 1256.699748 | 628.853512 | 1239.673199 | 620.340238 | 1238.689183 | 619.848230 | V | 948.478524  | 474.742900 | 931.451975  | 466.229626 | 930.467959  | 465.737618 | 8  |
| 12 | 1357.747427 | 679.377352 | 1340.720878 | 670.864077 | 1339.736862 | 670.372069 | T | 849.410110  | 425.208693 | 832.383561  | 416.695419 | 831.399545  | 416.203411 | 7  |
| 13 | 1520.810756 | 760.909016 | 1503.784207 | 752.395742 | 1502.800191 | 751.903734 | Y | 748.362431  | 374.684854 | 731.335882  | 366.171579 | 730.351866  | 365.679571 | 6  |
| 14 | 1621.858435 | 811.432856 | 1604.831886 | 802.919581 | 1603.847870 | 802.427573 | T | 585.299102  | 293.153189 | 568.272553  | 284.639915 | 567.288537  | 284.147907 | 5  |
| 15 | 1750.901028 | 875.954152 | 1733.874479 | 867.440878 | 1732.890463 | 866.948870 | E | 484.251423  | 242.629350 | 467.224874  | 234.116075 | 466.240858  | 233.624067 | 4  |
| 16 | 1887.959940 | 944.483608 | 1870.933391 | 935.970334 | 1869.949375 | 935.478326 | H | 355.208830  | 178.108053 | 338.182281  | 169.594779 |             |            | 3  |
| 17 | 1958.997054 | 980.002165 | 1941.970505 | 971.488891 | 1940.986489 | 970.996883 | A | 218.149918  | 109.578597 | 201.123369  | 101.065323 |             |            | 2  |
| 18 |             |            |             |            |             |            | K | 147.112804  | 74.060040  | 130.086255  | 65.546766  |             |            | 1  |

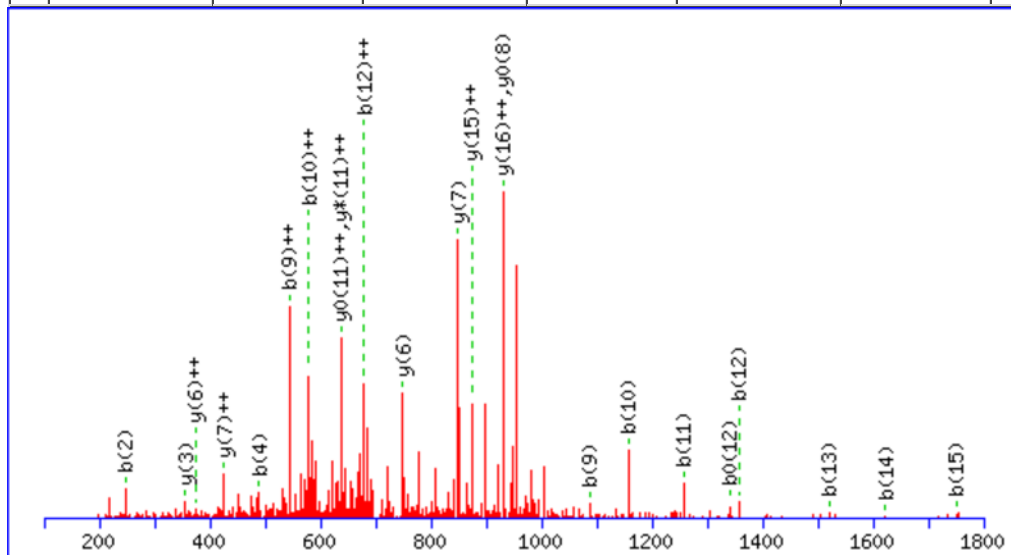

## Peptide View

MS/MS Fragmentation of **TENAVCGCSPGHFCIVQGDHCAACR**



Found in **IPI00024331**, Tax\_Id=9606 Gene\_Symbol=TNFRSF14 Tumor necrosis factor receptor superfamily member 14**Experiment:** 54 - PyC-3 **Fraction:** PyC-3

Match to Query 19249: 2977.185972 from(993.402600,3+)

Title: OECHL100317\_09.11272.11272.3.dta

Data file \\Boromir\masse\Data LTQ-Orbitrap\Chrystelle Lacroix\Etude clinique sJPU\OECHL100317\_09.raw

**Monoisotopic mass of neutral peptide Mr(calc):** 2977.178284**Fixed modifications:** Carbamidomethyl (C) (apply to specified residues or termini only)**Ions Score:** 53**Expect:** 6.8e-005**Matches :** 59/284 fragment ions using 136 most intense peaks ([help](#))

| #  | b           | b <sup>++</sup> | b <sup>*</sup> | b <sup>*++</sup> | b <sup>0</sup> | b <sup>0++</sup> | Seq. | y           | y <sup>++</sup> | y <sup>*</sup> | y <sup>*++</sup> | y <sup>0</sup> | y <sup>0++</sup> |
|----|-------------|-----------------|----------------|------------------|----------------|------------------|------|-------------|-----------------|----------------|------------------|----------------|------------------|
| 1  | 102.054955  | 51.531116       |                |                  | 84.044390      | 42.525833        | T    |             |                 |                |                  |                |                  |
| 2  | 231.097548  | 116.052412      |                |                  | 213.086983     | 107.047130       | E    | 2877.137837 | 1439.072556     | 2860.111288    | 1430.559282      | 2859.127272    | 1430.0672        |
| 3  | 345.140475  | 173.073876      | 328.113926     | 164.560601       | 327.129910     | 164.068593       | N    | 2748.095244 | 1374.551260     | 2731.068695    | 1366.037985      | 2730.084679    | 1365.5459        |
| 4  | 416.177589  | 208.592433      | 399.151040     | 200.079158       | 398.167024     | 199.587150       | A    | 2634.052317 | 1317.529796     | 2617.025768    | 1309.016522      | 2616.041752    | 1308.5245        |
| 5  | 515.246003  | 258.126640      | 498.219454     | 249.613365       | 497.235438     | 249.121357       | V    | 2563.015203 | 1282.011239     | 2545.988654    | 1273.497965      | 2545.004638    | 1273.0059        |
| 6  | 675.276652  | 338.141964      | 658.250103     | 329.628690       | 657.266087     | 329.136682       | C    | 2463.946789 | 1232.477032     | 2446.920240    | 1223.963758      | 2445.936224    | 1223.4717        |
| 7  | 732.298116  | 366.652696      | 715.271567     | 358.139422       | 714.287551     | 357.647414       | G    | 2303.916140 | 1152.461708     | 2286.889591    | 1143.948433      | 2285.905575    | 1143.4564        |
| 8  | 892.328765  | 446.668021      | 875.302216     | 438.154746       | 874.318200     | 437.662738       | C    | 2246.894676 | 1123.950976     | 2229.868127    | 1115.437701      | 2228.884111    | 1114.9456        |
| 9  | 979.360793  | 490.184035      | 962.334244     | 481.670760       | 961.350228     | 481.178752       | S    | 2086.864027 | 1043.935651     | 2069.837478    | 1035.422377      | 2068.853462    | 1034.9303        |
| 10 | 1076.413557 | 538.710417      | 1059.387008    | 530.197142       | 1058.402992    | 529.705134       | P    | 1999.831999 | 1000.419638     | 1982.805450    | 991.906363       | 1981.821434    | 991.4143         |
| 11 | 1133.435021 | 567.221149      | 1116.408472    | 558.707874       | 1115.424456    | 558.215866       | G    | 1902.779235 | 951.893256      | 1885.752686    | 943.379981       | 1884.768670    | 942.8879         |
| 12 | 1270.493933 | 635.750605      | 1253.467384    | 627.237330       | 1252.483368    | 626.745322       | H    | 1845.757771 | 923.382524      | 1828.731222    | 914.869249       | 1827.747206    | 914.3772         |
| 13 | 1417.562347 | 709.284812      | 1400.535798    | 700.771537       | 1399.551782    | 700.279529       | F    | 1708.698859 | 854.853068      | 1691.672310    | 846.339793       | 1690.688294    | 845.8477         |
| 14 | 1577.592996 | 789.300136      | 1560.566447    | 780.786862       | 1559.582431    | 780.294854       | C    | 1561.630445 | 781.318861      | 1544.603896    | 772.805586       | 1543.619880    | 772.3135         |
| 15 | 1690.677060 | 845.842168      | 1673.650511    | 837.328894       | 1672.666495    | 836.836885       | I    | 1401.599796 | 701.303536      | 1384.573247    | 692.790262       | 1383.589231    | 692.2982         |
| 16 | 1789.745474 | 895.376375      | 1772.718925    | 886.863101       | 1771.734909    | 886.371093       | V    | 1288.515732 | 644.761504      | 1271.489183    | 636.248230       | 1270.505167    | 635.7562         |
| 17 | 1917.804052 | 959.405664      | 1900.777503    | 950.892390       | 1899.793487    | 950.400382       | Q    | 1189.447318 | 595.227297      | 1172.420769    | 586.714023       | 1171.436753    | 586.2220         |
| 18 | 2032.830995 | 1016.919136     | 2015.804446    | 1008.405861      | 2014.820430    | 1007.913853      | D    | 1061.388740 | 531.198008      | 1044.362191    | 522.684734       | 1043.378175    | 522.1927         |
| 19 | 2089.852459 | 1045.429868     | 2072.825910    | 1036.916593      | 2071.841894    | 1036.424585      | G    | 946.361797  | 473.684537      | 929.335248     | 465.171262       | 928.351232     | 464.6792         |
| 20 | 2204.879402 | 1102.943339     | 2187.852853    | 1094.430064      | 2186.868837    | 1093.938056      | D    | 889.340333  | 445.173804      | 872.313784     | 436.660530       | 871.329768     | 436.1685         |
| 21 | 2341.938314 | 1171.472795     | 2324.911765    | 1162.959520      | 2323.927749    | 1162.467512      | H    | 774.313390  | 387.660333      | 757.286841     | 379.147059       |                |                  |
| 22 | 2501.968963 | 1251.488119     | 2484.942414    | 1242.974845      | 2483.958398    | 1242.482837      | C    | 637.254478  | 319.130877      | 620.227929     | 310.617603       |                |                  |
| 23 | 2573.006077 | 1287.006676     | 2555.979528    | 1278.493402      | 2554.995512    | 1278.001394      | A    | 477.223829  | 239.115553      | 460.197280     | 230.602278       |                |                  |
| 24 | 2644.043191 | 1322.525234     | 2627.016642    | 1314.011959      | 2626.032626    | 1313.519951      | A    | 406.186715  | 203.596995      | 389.160166     | 195.083721       |                |                  |

|    |             |                    |             |             |             |             |          |                   |            |                   |            |  |  |
|----|-------------|--------------------|-------------|-------------|-------------|-------------|----------|-------------------|------------|-------------------|------------|--|--|
| 25 | 2804.073840 | <b>1402.540558</b> | 2787.047291 | 1394.027283 | 2786.063275 | 1393.535275 | <b>C</b> | <b>335.149601</b> | 168.078438 | <b>318.123052</b> | 159.565164 |  |  |
| 26 |             |                    |             |             |             |             | <b>R</b> | 175.118952        | 88.063114  | 158.092403        | 79.549839  |  |  |

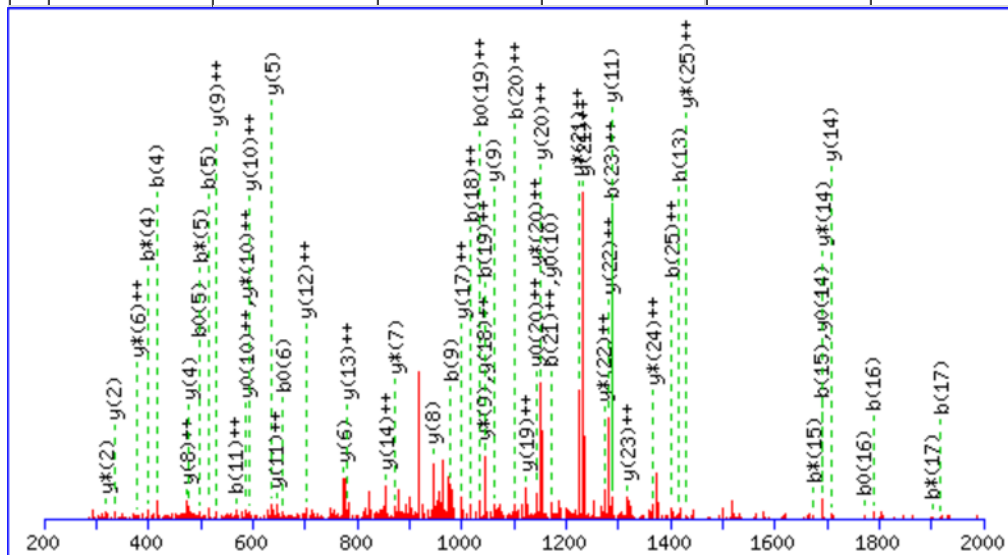

## Peptide View

MS/MS Fragmentation of **NPVLQQDAHSSVTITPQR**

Found in **IP100410488**, Tax\_Id=9606 Gene\_Symbol=CD276 Isoform 1 of CD276 antigen

**Experiment:** 05 - S\_B-3 **Fraction:** S\_B-3

Match to Query 14287: 1990.024648 from(996.019600,2+)

Title: OECHL100317\_07.10158.10158.2.dta

Data file \\Boromir\masse\Data LTQ-Orbitrap\Chrystelle Lacroix\Etude clinique sJPU\OECHL100317\_07.raw

**Monoisotopic mass of neutral peptide Mr(calc):** 1990.023209 **Fixed modifications:** Carbamidomethyl (C) (apply to specified residues or termini only) **Ions Score:** 94

**Expect:** 6e-008 **Matches :** 38/186 fragment ions using 64 most intense peaks ([help](#))

| # | b                 | b <sup>++</sup> | b <sup>*</sup>    | b <sup>*++</sup> | b <sup>0</sup> | b <sup>0++</sup> | Seq.     | y                  | y <sup>++</sup>   | y <sup>*</sup>     | y <sup>*++</sup> | y <sup>0</sup>     | y <sup>0++</sup> | #         |
|---|-------------------|-----------------|-------------------|------------------|----------------|------------------|----------|--------------------|-------------------|--------------------|------------------|--------------------|------------------|-----------|
| 1 | 115.050203        | 58.028740       | 98.023654         | 49.515465        |                |                  | <b>N</b> |                    |                   |                    |                  |                    |                  | <b>18</b> |
| 2 | 212.102967        | 106.555121      | 195.076418        | 98.041847        |                |                  | <b>P</b> | 1876.987553        | <b>938.997415</b> | 1859.961004        | 930.484140       | 1858.976988        | 929.992132       | <b>17</b> |
| 3 | <b>311.171381</b> | 156.089328      | <b>294.144832</b> | 147.576054       |                |                  | <b>V</b> | <b>1779.934789</b> | <b>890.471033</b> | 1762.908240        | 881.957758       | 1761.924224        | 881.465750       | <b>16</b> |
| 4 | <b>424.255445</b> | 212.631361      | 407.228896        | 204.118086       |                |                  | <b>L</b> | <b>1680.866375</b> | <b>840.936826</b> | <b>1663.839826</b> | 832.423551       | <b>1662.855810</b> | 831.931543       | <b>15</b> |

|    |                    |                   |                    |            |                    |                   |   |                    |            |             |                   |             |                   |    |
|----|--------------------|-------------------|--------------------|------------|--------------------|-------------------|---|--------------------|------------|-------------|-------------------|-------------|-------------------|----|
| 5  | <b>552.314023</b>  | 276.660650        | <b>535.287474</b>  | 268.147375 |                    |                   | Q | <b>1567.782311</b> | 784.394794 | 1550.755762 | <b>775.881519</b> | 1549.771746 | <b>775.389511</b> | 14 |
| 6  | 680.372601         | 340.689939        | 663.346052         | 332.176664 |                    |                   | Q | <b>1439.723733</b> | 720.365505 | 1422.697184 | 711.852230        | 1421.713168 | 711.360222        | 13 |
| 7  | 795.399544         | 398.203410        | 778.372995         | 389.690136 | 777.388979         | 389.198128        | D | <b>1311.665155</b> | 656.336215 | 1294.638606 | 647.822941        | 1293.654590 | 647.330933        | 12 |
| 8  | 866.436658         | 433.721967        | 849.410109         | 425.208693 | 848.426093         | <b>424.716685</b> | A | <b>1196.638212</b> | 598.822744 | 1179.611663 | 590.309470        | 1178.627647 | 589.817462        | 11 |
| 9  | 1003.495570        | <b>502.251423</b> | <b>986.469021</b>  | 493.738149 | 985.485005         | 493.246141        | H | <b>1125.601098</b> | 563.304187 | 1108.574549 | 554.790913        | 1107.590533 | 554.298905        | 10 |
| 10 | <b>1090.527598</b> | 545.767437        | 1073.501049        | 537.254163 | 1072.517033        | 536.762155        | S | <b>988.542186</b>  | 494.774731 | 971.515637  | 486.261457        | 970.531621  | 485.769449        | 9  |
| 11 | 1177.559626        | 589.283451        | 1160.533077        | 580.770177 | 1159.549061        | 580.278169        | S | <b>901.510158</b>  | 451.258717 | 884.483609  | 442.745443        | 883.499593  | 442.253435        | 8  |
| 12 | <b>1276.628040</b> | 638.817658        | 1259.601491        | 630.304384 | <b>1258.617475</b> | 629.812376        | V | <b>814.478130</b>  | 407.742703 | 797.451581  | 399.229428        | 796.467565  | 398.737420        | 7  |
| 13 | 1377.675719        | 689.341498        | 1360.649170        | 680.828223 | 1359.665154        | 680.336215        | T | <b>715.409716</b>  | 358.208496 | 698.383167  | 349.695221        | 697.399151  | 349.203213        | 6  |
| 14 | <b>1490.759783</b> | 745.883530        | <b>1473.733234</b> | 737.370255 | <b>1472.749218</b> | 736.878247        | I | <b>614.362037</b>  | 307.684656 | 597.335488  | 299.171382        | 596.351472  | 298.679374        | 5  |
| 15 | <b>1591.807462</b> | 796.407369        | <b>1574.780913</b> | 787.894095 | 1573.796897        | 787.402087        | T | <b>501.277973</b>  | 251.142624 | 484.251424  | 242.629350        | 483.267408  | 242.137342        | 4  |
| 16 | 1688.860226        | 844.933751        | 1671.833677        | 836.420477 | 1670.849661        | 835.928469        | P | <b>400.230294</b>  | 200.618785 | 383.203745  | 192.105510        |             |                   | 3  |
| 17 | <b>1816.918804</b> | 908.963040        | 1799.892255        | 900.449766 | 1798.908239        | 899.957758        | Q | 303.177530         | 152.092403 | 286.150981  | 143.579128        |             |                   | 2  |
| 18 |                    |                   |                    |            |                    |                   | R | 175.118952         | 88.063114  | 158.092403  | 79.549839         |             |                   | 1  |

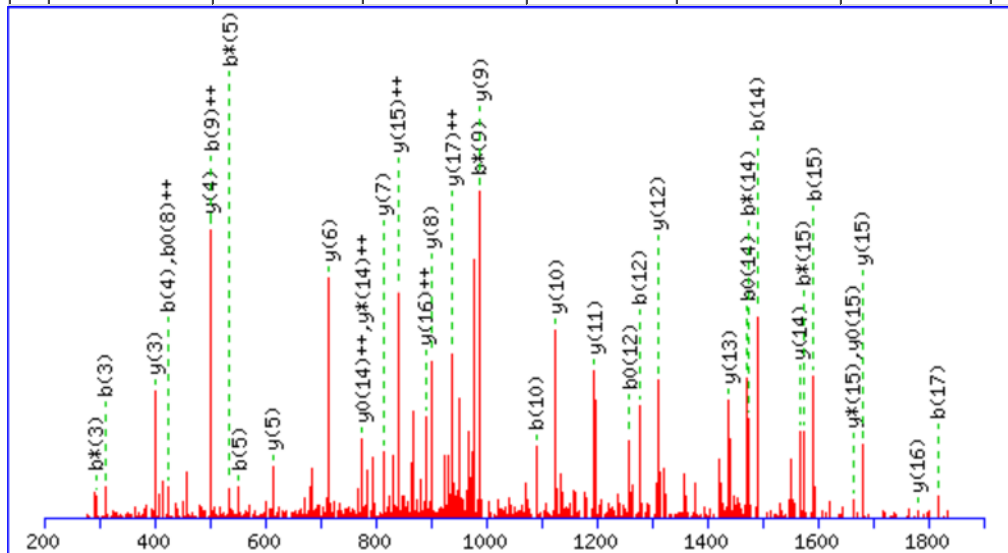

## Peptide View

MS/MS Fragmentation of **VFDKDGNGYISAAELR**Found in **IPI00075248**, Tax\_Id=9606 Gene\_Symbol=CALM3;CALM2;CALM1 Calmodulin

Experiment: 05 - S\_B-3 Fraction: S\_B-3

Match to Query 12462: 1753.863648 from(877.939100,2+)

Title: OECHL100317\_07.14110.14110.2.dta

Data file \\Boromir\masse\Data LTQ-Orbitrap\Chrystelle Lacroix\Etude clinique sJPU\OECHL100317\_07.raw

**Monoisotopic mass of neutral peptide Mr(calc):** 1753.863495**Fixed modifications:** Carbamidomethyl (C) (apply to specified residues or termini only)**Ions Score:** 104**Expect:** 5.6e-009**Matches :** 37/166 fragment ions using 60 most intense peaks ([help](#))

| #  | b           | b <sup>++</sup> | b*          | b <sup>*++</sup> | b <sup>0</sup> | b <sup>0++</sup> | Seq. | y           | y <sup>++</sup> | y*          | y <sup>*++</sup> | y <sup>0</sup> | y <sup>0++</sup> | #  |
|----|-------------|-----------------|-------------|------------------|----------------|------------------|------|-------------|-----------------|-------------|------------------|----------------|------------------|----|
| 1  | 100.075690  | 50.541483       |             |                  |                |                  | V    |             |                 |             |                  |                |                  | 16 |
| 2  | 247.144104  | 124.075690      |             |                  |                |                  | F    | 1655.802376 | 828.404826      | 1638.775827 | 819.891551       | 1637.791811    | 819.399543       | 15 |
| 3  | 362.171047  | 181.589161      |             |                  | 344.160482     | 172.583879       | D    | 1508.733962 | 754.870619      | 1491.707413 | 746.357345       | 1490.723397    | 745.865337       | 14 |
| 4  | 490.266010  | 245.636643      | 473.239461  | 237.123369       | 472.255445     | 236.631361       | K    | 1393.707019 | 697.357148      | 1376.680470 | 688.843873       | 1375.696454    | 688.351865       | 13 |
| 5  | 605.292953  | 303.150115      | 588.266404  | 294.636840       | 587.282388     | 294.144832       | D    | 1265.612056 | 633.309666      | 1248.585507 | 624.796392       | 1247.601491    | 624.304383       | 12 |
| 6  | 662.314417  | 331.660847      | 645.287868  | 323.147572       | 644.303852     | 322.655564       | G    | 1150.585113 | 575.796194      | 1133.558564 | 567.282920       | 1132.574548    | 566.790912       | 11 |
| 7  | 776.357344  | 388.682310      | 759.330795  | 380.169036       | 758.346779     | 379.677028       | N    | 1093.563649 | 547.285462      | 1076.537100 | 538.772188       | 1075.553084    | 538.280180       | 10 |
| 8  | 833.378808  | 417.193042      | 816.352259  | 408.679768       | 815.368243     | 408.187760       | G    | 979.520722  | 490.263999      | 962.494173  | 481.750724       | 961.510157     | 481.258716       | 9  |
| 9  | 996.442137  | 498.724707      | 979.415588  | 490.211432       | 978.431572     | 489.719424       | Y    | 922.499258  | 461.753267      | 905.472709  | 453.239992       | 904.488693     | 452.747984       | 8  |
| 10 | 1109.526201 | 555.266738      | 1092.499652 | 546.753464       | 1091.515636    | 546.261456       | I    | 759.435929  | 380.221603      | 742.409380  | 371.708328       | 741.425364     | 371.216320       | 7  |
| 11 | 1196.558229 | 598.782753      | 1179.531680 | 590.269478       | 1178.547664    | 589.777470       | S    | 646.351865  | 323.679571      | 629.325316  | 315.166296       | 628.341300     | 314.674288       | 6  |
| 12 | 1267.595343 | 634.301310      | 1250.568794 | 625.788035       | 1249.584778    | 625.296027       | A    | 559.319837  | 280.163557      | 542.293288  | 271.650282       | 541.309272     | 271.158274       | 5  |
| 13 | 1338.632457 | 669.819866      | 1321.605908 | 661.306592       | 1320.621892    | 660.814584       | A    | 488.282723  | 244.644999      | 471.256174  | 236.131725       | 470.272158     | 235.639717       | 4  |
| 14 | 1467.675050 | 734.341163      | 1450.648501 | 725.827889       | 1449.664485    | 725.335881       | E    | 417.245609  | 209.126442      | 400.219060  | 200.613168       | 399.235044     | 200.121160       | 3  |
| 15 | 1580.759114 | 790.883195      | 1563.732565 | 782.369921       | 1562.748549    | 781.877912       | L    | 288.203016  | 144.605146      | 271.176467  | 136.091871       |                |                  | 2  |
| 16 |             |                 |             |                  |                |                  | R    | 175.118952  | 88.063114       | 158.092403  | 79.549839        |                |                  | 1  |

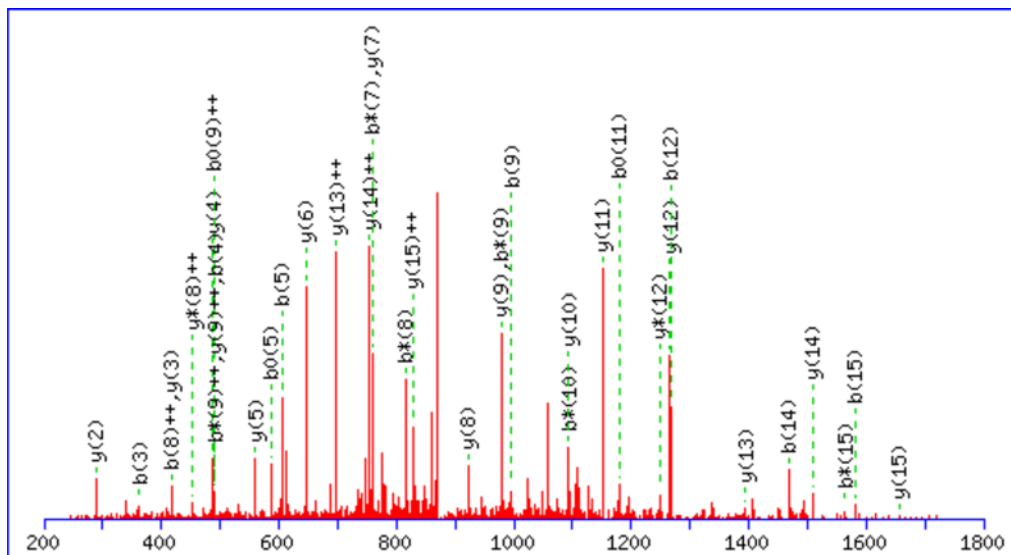

## Peptide View

MS/MS Fragmentation of **TVAGPVGGSLSVQCPYEKEHR**

Found in **IPI00414784**, Tax\_Id=9606 Gene\_Symbol=CD300A Isoform 1 of CMRF35-like molecule 8

**Experiment:** 05 - S\_B-3 **Fraction:** S\_B-3

Match to Query 15830: 2270.115448 from(1136.065000,2+)

Title: OECHL100317\_07.10824.10824.2.dta

Data file \\Boromir\masse\Data LTQ-Orbitrap\Chrystelle Lacroix\Etude clinique sJPU\OECHL100317\_07.raw

**Monoisotopic mass of neutral peptide Mr(calc):** 2270.111374 **Fixed modifications:** Carbamidomethyl (C) (apply to specified residues or termini only) **Ions Score:** 104

**Expect:** 8.5e-009 **Matches :** 24/212 fragment ions using 34 most intense peaks ([help](#))

| # | b          | b <sup>++</sup> | b* | b <sup>*++</sup> | b <sup>0</sup> | b <sup>0++</sup> | Seq. | y           | y <sup>++</sup> | y*          | y <sup>*++</sup> | y <sup>0</sup> | y <sup>0++</sup> |
|---|------------|-----------------|----|------------------|----------------|------------------|------|-------------|-----------------|-------------|------------------|----------------|------------------|
| 1 | 102.054955 | 51.531116       |    |                  | 84.044390      | 42.525833        | T    |             |                 |             |                  |                |                  |
| 2 | 201.123369 | 101.065322      |    |                  | 183.112804     | 92.060040        | V    | 2170.070965 | 1085.539120     | 2153.044416 | 1077.025846      | 2152.060400    | 1076.5338        |
| 3 | 272.160483 | 136.583879      |    |                  | 254.149918     | 127.578597       | A    | 2071.002551 | 1036.004913     | 2053.976002 | 1027.491639      | 2052.991986    | 1026.9996        |
| 4 | 329.181947 | 165.094611      |    |                  | 311.171382     | 156.089329       | G    | 1999.965437 | 1000.486357     | 1982.938888 | 991.973082       | 1981.954872    | 991.4810         |
| 5 | 426.234711 | 213.620994      |    |                  | 408.224146     | 204.615711       | P    | 1942.943973 | 971.975625      | 1925.917424 | 963.462350       | 1924.933408    | 962.9703         |
| 6 | 525.303125 | 263.155201      |    |                  | 507.292560     | 254.149918       | V    | 1845.891209 | 923.449243      | 1828.864660 | 914.935968       | 1827.880644    | 914.4439         |

|    |             |             |             |             |             |             |   |             |            |             |            |             |          |
|----|-------------|-------------|-------------|-------------|-------------|-------------|---|-------------|------------|-------------|------------|-------------|----------|
| 7  | 582.324589  | 291.665933  |             |             | 564.314024  | 282.660650  | G | 1746.822795 | 873.915036 | 1729.796246 | 865.401761 | 1728.812230 | 864.9097 |
| 8  | 639.346053  | 320.176665  |             |             | 621.335488  | 311.171382  | G | 1689.801331 | 845.404304 | 1672.774782 | 836.891029 | 1671.790766 | 836.3990 |
| 9  | 726.378081  | 363.692679  |             |             | 708.367516  | 354.687396  | S | 1632.779867 | 816.893572 | 1615.753318 | 808.380297 | 1614.769302 | 807.8882 |
| 10 | 839.462145  | 420.234711  |             |             | 821.451580  | 411.229428  | L | 1545.747839 | 773.377558 | 1528.721290 | 764.864283 | 1527.737274 | 764.3722 |
| 11 | 926.494173  | 463.750725  |             |             | 908.483608  | 454.745442  | S | 1432.663775 | 716.835526 | 1415.637226 | 708.322251 | 1414.653210 | 707.8302 |
| 12 | 1025.562587 | 513.284932  |             |             | 1007.552022 | 504.279649  | V | 1345.631747 | 673.319512 | 1328.605198 | 664.806237 | 1327.621182 | 664.3142 |
| 13 | 1153.621165 | 577.314221  | 1136.594616 | 568.800946  | 1135.610600 | 568.308938  | Q | 1246.563333 | 623.785305 | 1229.536784 | 615.272030 | 1228.552768 | 614.7800 |
| 14 | 1313.651814 | 657.329545  | 1296.625265 | 648.816271  | 1295.641249 | 648.324263  | C | 1118.504755 | 559.756016 | 1101.478206 | 551.242741 | 1100.494190 | 550.7507 |
| 15 | 1410.704578 | 705.855927  | 1393.678029 | 697.342653  | 1392.694013 | 696.850645  | P | 958.474106  | 479.740691 | 941.447557  | 471.227417 | 940.463541  | 470.7354 |
| 16 | 1573.767907 | 787.387592  | 1556.741358 | 778.874317  | 1555.757342 | 778.382309  | Y | 861.421342  | 431.214309 | 844.394793  | 422.701035 | 843.410777  | 422.2090 |
| 17 | 1702.810500 | 851.908888  | 1685.783951 | 843.395614  | 1684.799935 | 842.903606  | E | 698.358013  | 349.682645 | 681.331464  | 341.169370 | 680.347448  | 340.6773 |
| 18 | 1830.905463 | 915.956370  | 1813.878914 | 907.443095  | 1812.894898 | 906.951087  | K | 569.315420  | 285.161348 | 552.288871  | 276.648074 | 551.304855  | 276.1560 |
| 19 | 1959.948056 | 980.477666  | 1942.921507 | 971.964392  | 1941.937491 | 971.472384  | E | 441.220457  | 221.113867 | 424.193908  | 212.600592 | 423.209892  | 212.1085 |
| 20 | 2097.006968 | 1049.007122 | 2079.980419 | 1040.493847 | 2078.996403 | 1040.001840 | H | 312.177864  | 156.592570 | 295.151315  | 148.079295 |             |          |
| 21 |             |             |             |             |             |             | R | 175.118952  | 88.063114  | 158.092403  | 79.549839  |             |          |

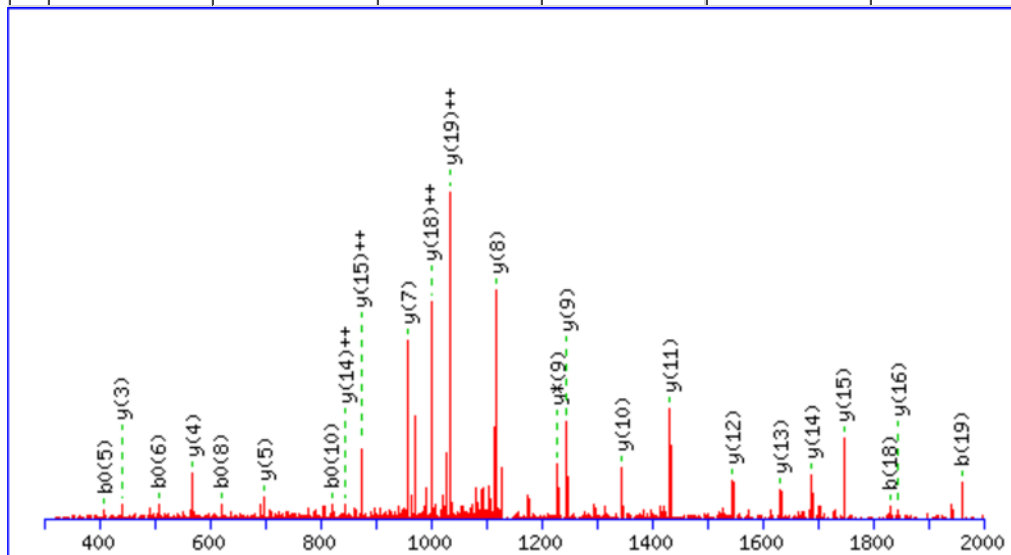

## Peptide View

MS/MS Fragmentation of **AVGLLTVISK**Found in **IPI00013446**, Tax\_Id=9606 Gene\_Symbol=PSCA Prostate stem cell antigen**Experiment:** 05 - S\_B-3 **Fraction:** S\_B-3

Match to Query 3371: 999.634848 from(500.824700,2+)

Title: OECHL100317\_07.18066.18066.2.dta

Data file \\Boromir\masse\Data LTQ-Orbitrap\Chrystelle Lacroix\Etude clinique sJPU\OECHL100317\_07.raw

**Monoisotopic mass of neutral peptide Mr(calc):** 999.632828**Fixed modifications:** Carbamidomethyl (C) (apply to specified residues or termini only)**Ions Score:** 65**Expect:** 3.7e-006**Matches :** 16/78 fragment ions using 24 most intense peaks ([help](#))

| #  | b                 | b <sup>++</sup>   | b <sup>0</sup> | b <sup>0++</sup> | Seq. | y                 | y <sup>++</sup>   | y*         | y <sup>*++</sup> | y <sup>0</sup> | y <sup>0++</sup> | #  |
|----|-------------------|-------------------|----------------|------------------|------|-------------------|-------------------|------------|------------------|----------------|------------------|----|
| 1  | 72.044390         | 36.525833         |                |                  | A    |                   |                   |            |                  |                |                  | 10 |
| 2  | <b>171.112804</b> | 86.060040         |                |                  | V    | 929.602995        | 465.305136        | 912.576446 | 456.791861       | 911.592430     | 456.299853       | 9  |
| 3  | <b>228.134268</b> | 114.570772        |                |                  | G    | <b>830.534581</b> | <b>415.770929</b> | 813.508032 | 407.257654       | 812.524016     | 406.765646       | 8  |
| 4  | <b>341.218332</b> | <b>171.112804</b> |                |                  | L    | 773.513117        | 387.260197        | 756.486568 | 378.746922       | 755.502552     | 378.254914       | 7  |
| 5  | <b>454.302396</b> | 227.654836        |                |                  | L    | <b>660.429053</b> | 330.718165        | 643.402504 | 322.204890       | 642.418488     | 321.712882       | 6  |
| 6  | <b>555.350075</b> | 278.178676        | 537.339510     | 269.173393       | T    | <b>547.344989</b> | 274.176133        | 530.318440 | 265.662858       | 529.334424     | 265.170850       | 5  |
| 7  | <b>654.418489</b> | 327.712883        | 636.407924     | 318.707600       | V    | <b>446.297310</b> | 223.652293        | 429.270761 | 215.139018       | 428.286745     | 214.647010       | 4  |
| 8  | <b>767.502553</b> | 384.254915        | 749.491988     | 375.249632       | I    | <b>347.228896</b> | 174.118086        | 330.202347 | 165.604811       | 329.218331     | 165.112803       | 3  |
| 9  | <b>854.534581</b> | 427.770929        | 836.524016     | 418.765646       | S    | <b>234.144832</b> | 117.576054        | 217.118283 | 109.062779       | 216.134267     | 108.570771       | 2  |
| 10 |                   |                   |                |                  | K    | 147.112804        | 74.060040         | 130.086255 | 65.546765        |                |                  | 1  |

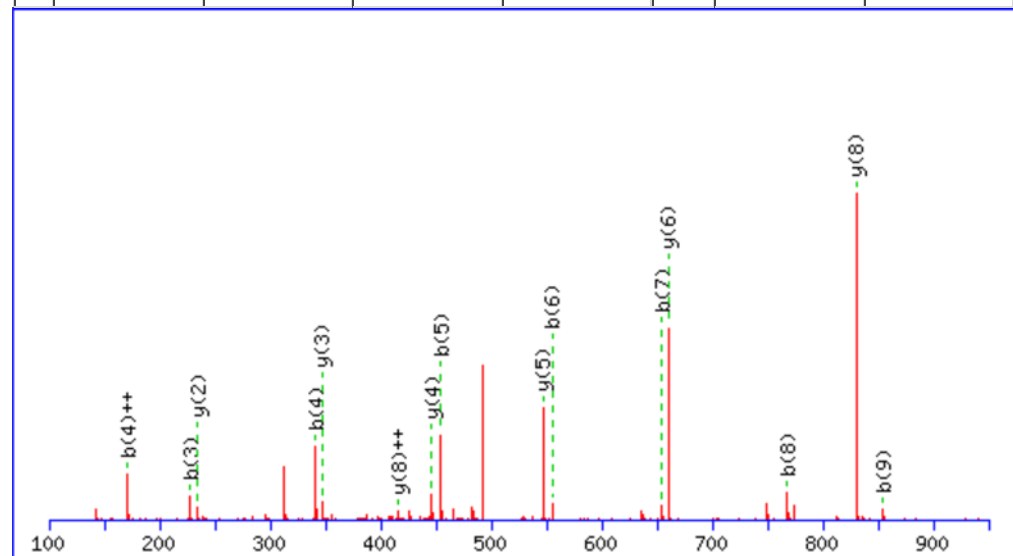

## Peptide View

MS/MS Fragmentation of **ASGVPDFRFSGSGSGTDFTLK**

Found in **IP100387107**, Tax\_Id=9606 Gene\_Symbol=IGKV2-40 Ig kappa chain V-II region Cum

Experiment: 05 - S\_B-3 Fraction: S\_B-3

Match to Query 14259: 1984.948448 from(993.481500,2+)

Title: OECHL100317\_07.14020.14020.2.dta

Data file \\Boromir\masse\Data LTQ-Orbitrap\Chrystelle Lacroix\Etude clinique sJPU\OECHL100317\_07.raw

**Monoisotopic mass of neutral peptide Mr(calc):** 1984.949066 **Fixed modifications:** Carbamidomethyl (C) (apply to specified residues or termini only) **Ions Score:** 55

**Expect:** 0.00054 **Matches :** 35/210 fragment ions using 64 most intense peaks ([help](#))

| #  | b           | b <sup>++</sup> | b <sup>*</sup> | b <sup>*++</sup> | b <sup>0</sup> | b <sup>0++</sup> | Seq. | y           | y <sup>++</sup> | y <sup>*</sup> | y <sup>*++</sup> | y <sup>0</sup> | y <sup>0++</sup> | #  |
|----|-------------|-----------------|----------------|------------------|----------------|------------------|------|-------------|-----------------|----------------|------------------|----------------|------------------|----|
| 1  | 72.044390   | 36.525833       |                |                  |                |                  | A    |             |                 |                |                  |                |                  | 20 |
| 2  | 159.076418  | 80.041847       |                |                  | 141.065853     | 71.036564        | S    | 1914.919197 | 957.963236      | 1897.892648    | 949.449962       | 1896.908632    | 948.957954       | 19 |
| 3  | 216.097882  | 108.552579      |                |                  | 198.087317     | 99.547296        | G    | 1827.887169 | 914.447222      | 1810.860620    | 905.933948       | 1809.876604    | 905.441940       | 18 |
| 4  | 315.166296  | 158.086786      |                |                  | 297.155731     | 149.081504       | V    | 1770.865705 | 885.936490      | 1753.839156    | 877.423216       | 1752.855140    | 876.931208       | 17 |
| 5  | 412.219060  | 206.613168      |                |                  | 394.208495     | 197.607885       | P    | 1671.797291 | 836.402283      | 1654.770742    | 827.889009       | 1653.786726    | 827.397001       | 16 |
| 6  | 527.246003  | 264.126640      |                |                  | 509.235438     | 255.121357       | D    | 1574.744527 | 787.875902      | 1557.717978    | 779.362627       | 1556.733962    | 778.870619       | 15 |
| 7  | 683.347114  | 342.177195      | 666.320565     | 333.663920       | 665.336549     | 333.171912       | R    | 1459.717584 | 730.362430      | 1442.691035    | 721.849156       | 1441.707019    | 721.357148       | 14 |
| 8  | 830.415528  | 415.711402      | 813.388979     | 407.198127       | 812.404963     | 406.706119       | F    | 1303.616473 | 652.311875      | 1286.589924    | 643.798600       | 1285.605908    | 643.306592       | 13 |
| 9  | 917.447556  | 459.227416      | 900.421007     | 450.714141       | 899.436991     | 450.222133       | S    | 1156.548059 | 578.777668      | 1139.521510    | 570.264393       | 1138.537494    | 569.772385       | 12 |
| 10 | 974.469020  | 487.738148      | 957.442471     | 479.224873       | 956.458455     | 478.732865       | G    | 1069.516031 | 535.261654      | 1052.489482    | 526.748379       | 1051.505466    | 526.256371       | 11 |
| 11 | 1061.501048 | 531.254162      | 1044.474499    | 522.740887       | 1043.490483    | 522.248879       | S    | 1012.494567 | 506.750922      | 995.468018     | 498.237647       | 994.484002     | 497.745639       | 10 |
| 12 | 1118.522512 | 559.764894      | 1101.495963    | 551.251619       | 1100.511947    | 550.759611       | G    | 925.462539  | 463.234908      | 908.435990     | 454.721633       | 907.451974     | 454.229625       | 9  |
| 13 | 1205.554540 | 603.280908      | 1188.527991    | 594.767633       | 1187.543975    | 594.275625       | S    | 868.441075  | 434.724176      | 851.414526     | 426.210901       | 850.430510     | 425.718893       | 8  |
| 14 | 1262.576004 | 631.791640      | 1245.549455    | 623.278365       | 1244.565439    | 622.786357       | G    | 781.409047  | 391.208162      | 764.382498     | 382.694887       | 763.398482     | 382.202879       | 7  |
| 15 | 1363.623683 | 682.315479      | 1346.597134    | 673.802205       | 1345.613118    | 673.310197       | T    | 724.387583  | 362.697430      | 707.361034     | 354.184155       | 706.377018     | 353.692147       | 6  |
| 16 | 1478.650626 | 739.828951      | 1461.624077    | 731.315677       | 1460.640061    | 730.823668       | D    | 623.339904  | 312.173590      | 606.313355     | 303.660316       | 605.329339     | 303.168308       | 5  |
| 17 | 1625.719040 | 813.363158      | 1608.692491    | 804.849884       | 1607.708475    | 804.357875       | F    | 508.312961  | 254.660118      | 491.286412     | 246.146844       | 490.302396     | 245.654836       | 4  |
| 18 | 1726.766719 | 863.886998      | 1709.740170    | 855.373723       | 1708.756154    | 854.881715       | T    | 361.244547  | 181.125911      | 344.217998     | 172.612637       | 343.233982     | 172.120629       | 3  |
| 19 | 1839.850783 | 920.429029      | 1822.824234    | 911.915755       | 1821.840218    | 911.423747       | L    | 260.196868  | 130.602072      | 243.170319     | 122.088797       |                |                  | 2  |



|    |  |  |  |  |  |  |          |            |           |            |           |  |  |          |
|----|--|--|--|--|--|--|----------|------------|-----------|------------|-----------|--|--|----------|
| 20 |  |  |  |  |  |  | <b>K</b> | 147.112804 | 74.060040 | 130.086255 | 65.546765 |  |  | <b>1</b> |
|----|--|--|--|--|--|--|----------|------------|-----------|------------|-----------|--|--|----------|

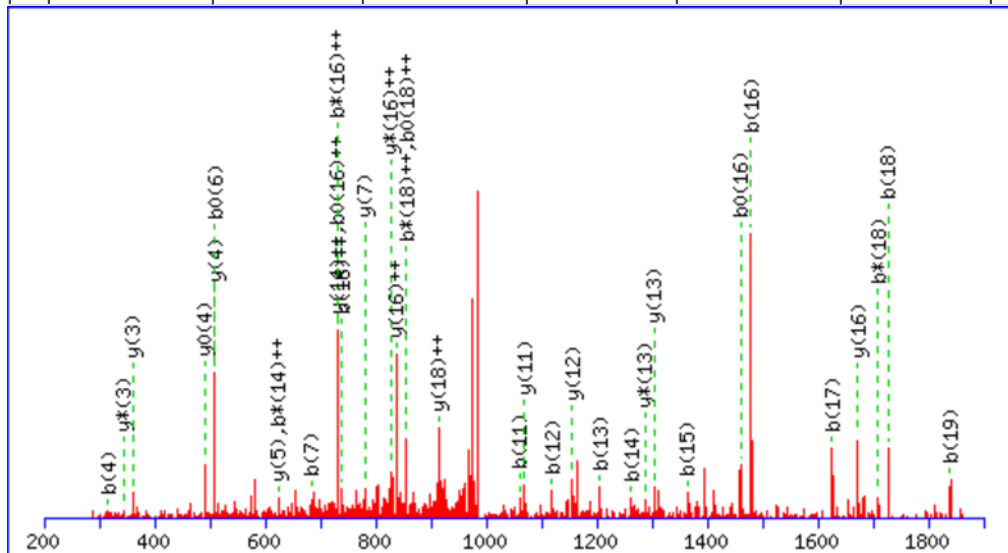

## Peptide View

MS/MS Fragmentation of **LLIYDASNLETGVPSR**

Found in **IPI00003111**, Tax\_Id=9606 Gene\_Symbol=LOC652694 Ig kappa chain V-I region AU

**Experiment:** 05 - S\_B-3 **Fraction:** S\_B-3

Match to Query 12390: 1746.919048 from(874.466800,2+)

Title: OECHL100317\_07.17875.17875.2.dta

Data file \\Boromir\masse\Data LTQ-Orbitrap\Chrystelle Lacroix\Etude clinique sJPU\OECHL100317\_07.raw

**Monoisotopic mass of neutral peptide Mr(calc):** 1746.915192 **Fixed modifications:** Carbamidomethyl (C) (apply to specified residues or termini only) **Ions Score:** 86

**Expect:** 3e-007 **Matches :** 29/156 fragment ions using 42 most intense peaks ([help](#))

| #        | b          | b <sup>++</sup> | b <sup>*</sup> | b <sup>*++</sup> | b <sup>0</sup> | b <sup>0++</sup> | Seq.     | y                  | y <sup>++</sup>   | y <sup>*</sup> | y <sup>*++</sup>  | y <sup>0</sup>     | y <sup>0++</sup> | #         |
|----------|------------|-----------------|----------------|------------------|----------------|------------------|----------|--------------------|-------------------|----------------|-------------------|--------------------|------------------|-----------|
| <b>1</b> | 114.091340 | 57.549308       |                |                  |                |                  | <b>L</b> |                    |                   |                |                   |                    |                  | <b>16</b> |
| <b>2</b> | 227.175404 | 114.091340      |                |                  |                |                  | <b>L</b> | 1634.838427        | 817.922852        | 1617.811878    | 809.409577        | 1616.827862        | 808.917569       | <b>15</b> |
| <b>3</b> | 340.259468 | 170.633372      |                |                  |                |                  | <b>I</b> | <b>1521.754363</b> | <b>761.380820</b> | 1504.727814    | <b>752.867545</b> | 1503.743798        | 752.375537       | <b>14</b> |
| <b>4</b> | 503.322797 | 252.165036      |                |                  |                |                  | <b>Y</b> | 1408.670299        | <b>704.838788</b> | 1391.643750    | 696.325513        | <b>1390.659734</b> | 695.833505       | <b>13</b> |
| <b>5</b> | 618.349740 | 309.678508      |                |                  | 600.339175     | 300.673226       | <b>D</b> | <b>1245.606970</b> | 623.307123        | 1228.580421    | 614.793849        | 1227.596405        | 614.301841       | <b>12</b> |

|    |                    |                   |                    |            |                    |            |          |                    |            |                   |            |                   |            |           |
|----|--------------------|-------------------|--------------------|------------|--------------------|------------|----------|--------------------|------------|-------------------|------------|-------------------|------------|-----------|
| 6  | <b>689.386854</b>  | 345.197065        |                    |            | 671.376289         | 336.191782 | <b>A</b> | <b>1130.580027</b> | 565.793652 | 1113.553478       | 557.280377 | 1112.569462       | 556.788369 | <b>11</b> |
| 7  | 776.418882         | 388.713079        |                    |            | 758.408317         | 379.707796 | <b>S</b> | <b>1059.542913</b> | 530.275095 | 1042.516364       | 521.761820 | 1041.532348       | 521.269812 | <b>10</b> |
| 8  | 890.461809         | 445.734542        | 873.435260         | 437.221268 | 872.451244         | 436.729260 | <b>N</b> | <b>972.510885</b>  | 486.759081 | 955.484336        | 478.245806 | 954.500320        | 477.753798 | <b>9</b>  |
| 9  | <b>1003.545873</b> | 502.276574        | 986.519324         | 493.763300 | 985.535308         | 493.271292 | <b>L</b> | <b>858.467958</b>  | 429.737617 | 841.441409        | 421.224343 | 840.457393        | 420.732335 | <b>8</b>  |
| 10 | <b>1132.588466</b> | 566.797871        | 1115.561917        | 558.284597 | 1114.577901        | 557.792588 | <b>E</b> | <b>745.383894</b>  | 373.195585 | 728.357345        | 364.682311 | 727.373329        | 364.190303 | <b>7</b>  |
| 11 | <b>1233.636145</b> | <b>617.321710</b> | 1216.609596        | 608.808436 | <b>1215.625580</b> | 608.316428 | <b>T</b> | <b>616.341301</b>  | 308.674289 | 599.314752        | 300.161014 | 598.330736        | 299.669006 | <b>6</b>  |
| 12 | <b>1290.657609</b> | 645.832442        | 1273.631060        | 637.319168 | 1272.647044        | 636.827160 | <b>G</b> | <b>515.293622</b>  | 258.150449 | 498.267073        | 249.637175 | 497.283057        | 249.145167 | <b>5</b>  |
| 13 | <b>1389.726023</b> | 695.366649        | <b>1372.699474</b> | 686.853375 | 1371.715458        | 686.361367 | <b>V</b> | <b>458.272158</b>  | 229.639717 | 441.245609        | 221.126443 | 440.261593        | 220.634435 | <b>4</b>  |
| 14 | <b>1486.778787</b> | 743.893032        | 1469.752238        | 735.379757 | 1468.768222        | 734.887749 | <b>P</b> | <b>359.203744</b>  | 180.105510 | <b>342.177195</b> | 171.592236 | <b>341.193179</b> | 171.100228 | <b>3</b>  |
| 15 | <b>1573.810815</b> | 787.409046        | 1556.784266        | 778.895771 | <b>1555.800250</b> | 778.403763 | <b>S</b> | 262.150980         | 131.579128 | 245.124431        | 123.065854 | 244.140415        | 122.573846 | <b>2</b>  |
| 16 |                    |                   |                    |            |                    |            | <b>R</b> | 175.118952         | 88.063114  | 158.092403        | 79.549839  |                   |            | <b>1</b>  |

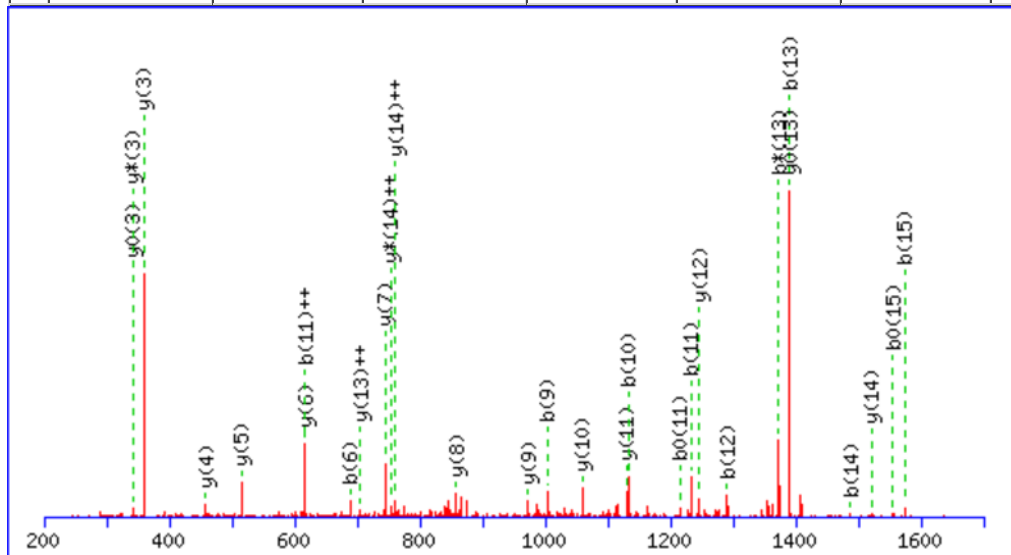

## Peptide View

MS/MS Fragmentation of **DFSLTSSSQTPGATK**

Found in **IP100291300**, Tax\_Id=9606 Gene\_Symbol=PODXL2 Putative uncharacterized protein PODXL2

Experiment: 05 - S\_B-3 Fraction: S\_B-3

Match to Query 10149: 1525.727048 from(763.870800,2+)

Title: OECHL100317\_07.11159.11159.2.dta

Data file \\Boromir\masse\Data LTQ-Orbitrap\Chrystelle Lacroix\Etude clinique sJPU\OECHL100317\_07.raw

**Monoisotopic mass of neutral peptide Mr(calc): 1525.726028**Fixed modifications: Carbamidomethyl (C) (apply to specified residues or termini only)**Ions Score: 64****Expect: 5.1e-005**Matches : 19/150 fragment ions using 26 most intense peaks ([help](#))

| #  | b                  | b <sup>++</sup> | b*          | b <sup>*++</sup> | b <sup>0</sup>    | b <sup>0++</sup> | Seq. | y                  | y <sup>++</sup>   | y*          | y <sup>*++</sup>  | y <sup>0</sup> | y <sup>0++</sup>  | #  |
|----|--------------------|-----------------|-------------|------------------|-------------------|------------------|------|--------------------|-------------------|-------------|-------------------|----------------|-------------------|----|
| 1  | 116.034219         | 58.520748       |             |                  | 98.023654         | 49.515465        | D    |                    |                   |             |                   |                |                   | 15 |
| 2  | <b>263.102633</b>  | 132.054954      |             |                  | 245.092068        | 123.049672       | F    | 1411.706351        | 706.356813        | 1394.679802 | 697.843539        | 1393.695786    | 697.351531        | 14 |
| 3  | <b>350.134661</b>  | 175.570968      |             |                  | <b>332.124096</b> | 166.565686       | S    | 1264.637937        | <b>632.822607</b> | 1247.611388 | 624.309332        | 1246.627372    | 623.817324        | 13 |
| 4  | 463.218725         | 232.113001      |             |                  | 445.208160        | 223.107718       | L    | 1177.605909        | 589.306592        | 1160.579360 | 580.793318        | 1159.595344    | 580.301310        | 12 |
| 5  | <b>564.266404</b>  | 282.636840      |             |                  | 546.255839        | 273.631558       | T    | <b>1064.521845</b> | 532.764561        | 1047.495296 | 524.251286        | 1046.511280    | 523.759278        | 11 |
| 6  | 651.298432         | 326.152854      |             |                  | 633.287867        | 317.147572       | S    | <b>963.474166</b>  | 482.240721        | 946.447617  | <b>473.727446</b> | 945.463601     | <b>473.235438</b> | 10 |
| 7  | 738.330460         | 369.668868      |             |                  | 720.319895        | 360.663586       | S    | <b>876.442138</b>  | 438.724707        | 859.415589  | 430.211432        | 858.431573     | 429.719424        | 9  |
| 8  | <b>825.362488</b>  | 413.184882      |             |                  | 807.351923        | 404.179599       | S    | 789.410110         | 395.208693        | 772.383561  | 386.695418        | 771.399545     | 386.203410        | 8  |
| 9  | <b>953.421066</b>  | 477.214171      | 936.394517  | 468.700897       | 935.410501        | 468.208889       | Q    | <b>702.378082</b>  | 351.692679        | 685.351533  | 343.179404        | 684.367517     | 342.687396        | 7  |
| 10 | <b>1054.468745</b> | 527.738010      | 1037.442196 | 519.224736       | 1036.458180       | 518.732728       | T    | <b>574.319504</b>  | 287.663390        | 557.292955  | 279.150115        | 556.308939     | 278.658107        | 6  |
| 11 | 1151.521509        | 576.264392      | 1134.494960 | 567.751118       | 1133.510944       | 567.259110       | P    | <b>473.271825</b>  | 237.139550        | 456.245276  | 228.626276        | 455.261260     | 228.134268        | 5  |
| 12 | 1208.542973        | 604.775124      | 1191.516424 | 596.261850       | 1190.532408       | 595.769842       | G    | 376.219061         | 188.613168        | 359.192512  | 180.099894        | 358.208496     | 179.607886        | 4  |
| 13 | <b>1279.580087</b> | 640.293681      | 1262.553538 | 631.780407       | 1261.569522       | 631.288399       | A    | 319.197597         | 160.102436        | 302.171048  | 151.589162        | 301.187032     | 151.097154        | 3  |
| 14 | <b>1380.627766</b> | 690.817521      | 1363.601217 | 682.304246       | 1362.617201       | 681.812238       | T    | <b>248.160483</b>  | 124.583879        | 231.133934  | 116.070605        | 230.149918     | 115.578597        | 2  |
| 15 |                    |                 |             |                  |                   |                  | K    | 147.112804         | 74.060040         | 130.086255  | 65.546765         |                |                   | 1  |

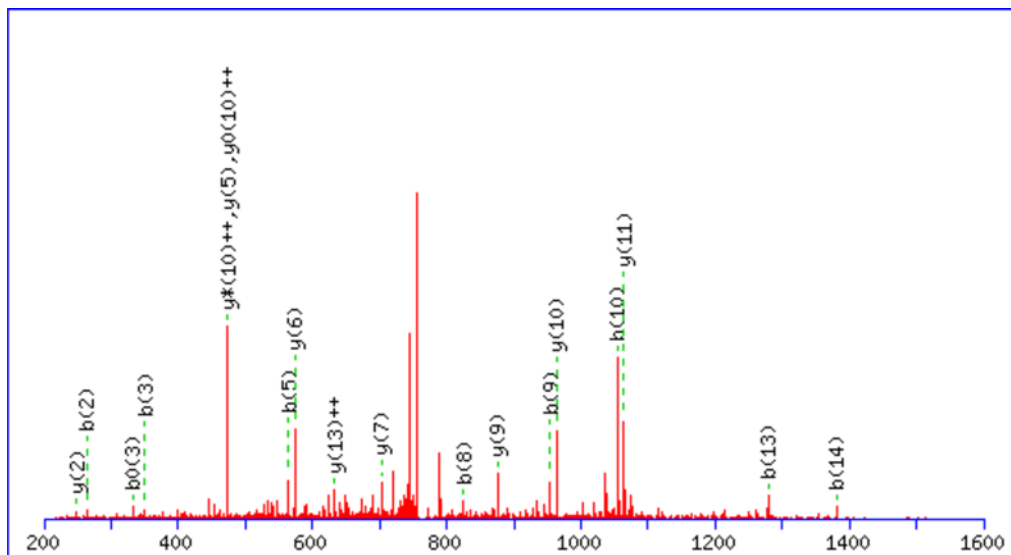

## Peptide View

MS/MS Fragmentation of **IESVLSSSGKR**

Found in **IPI00018236**, Tax\_Id=9606 Gene\_Symbol=GM2A Ganglioside GM2 activator

**Experiment:** 05 - S\_B-3 **Fraction:** S\_B-3

Match to Query 5746: 1161.634848 from(581.824700,2+)

Title: OECHL100317\_07.5602.5602.2.dta

Data file \\Boromir\masse\Data LTQ-Orbitrap\Chrystelle Lacroix\Etude clinique sJPU\OECHL100317\_07.raw

**Monoisotopic mass of neutral peptide Mr(calc):** 1161.635330 **Fixed modifications:** Carbamidomethyl (C) (apply to specified residues or termini only) **Ions Score:** 55

**Expect:** 0.00019 **Matches :** 20/94 fragment ions using 36 most intense peaks ([help](#))

| # | b                 | b <sup>++</sup>   | b* | b <sup>*++</sup> | b <sup>0</sup>    | b <sup>0++</sup> | Seq. | y                  | y <sup>++</sup>   | y*                | y <sup>*++</sup> | y <sup>0</sup> | y <sup>0++</sup> | #  |
|---|-------------------|-------------------|----|------------------|-------------------|------------------|------|--------------------|-------------------|-------------------|------------------|----------------|------------------|----|
| 1 | 114.091340        | 57.549308         |    |                  |                   |                  | I    |                    |                   |                   |                  |                |                  | 11 |
| 2 | <b>243.133933</b> | 122.070605        |    |                  | 225.123368        | 113.065322       | E    | <b>1049.558562</b> | <b>525.282919</b> | 1032.532013       | 516.769645       | 1031.547997    | 516.277637       | 10 |
| 3 | <b>330.165961</b> | 165.586618        |    |                  | <b>312.155396</b> | 156.581336       | S    | <b>920.515969</b>  | <b>460.761623</b> | <b>903.489420</b> | 452.248348       | 902.505404     | 451.756340       | 9  |
| 4 | 429.234375        | <b>215.120826</b> |    |                  | <b>411.223810</b> | 206.115543       | V    | <b>833.483941</b>  | 417.245609        | 816.457392        | 408.732334       | 815.473376     | 408.240326       | 8  |
| 5 | 542.318439        | 271.662858        |    |                  | 524.307874        | 262.657575       | L    | <b>734.415527</b>  | 367.711402        | 717.388978        | 359.198127       | 716.404962     | 358.706119       | 7  |
| 6 | 629.350467        | 315.178872        |    |                  | 611.339902        | 306.173589       | S    | <b>621.331463</b>  | 311.169370        | 604.304914        | 302.656095       | 603.320898     | 302.164087       | 6  |

|    |            |            |            |            |            |            |   |            |            |            |            |            |            |   |
|----|------------|------------|------------|------------|------------|------------|---|------------|------------|------------|------------|------------|------------|---|
| 7  | 716.382495 | 358.694886 |            |            | 698.371930 | 349.689603 | S | 534.299435 | 267.653356 | 517.272886 | 259.140081 | 516.288870 | 258.648073 | 5 |
| 8  | 803.414523 | 402.210899 |            |            | 785.403958 | 393.205617 | S | 447.267407 | 224.137342 | 430.240858 | 215.624067 | 429.256842 | 215.132059 | 4 |
| 9  | 860.435987 | 430.721632 |            |            | 842.425422 | 421.716349 | G | 360.235379 | 180.621328 | 343.208830 | 172.108053 |            |            | 3 |
| 10 | 988.530950 | 494.769113 | 971.504401 | 486.255838 | 970.520385 | 485.763830 | K | 303.213915 | 152.110596 | 286.187366 | 143.597321 |            |            | 2 |
| 11 |            |            |            |            |            |            | R | 175.118952 | 88.063114  | 158.092403 | 79.549840  |            |            | 1 |

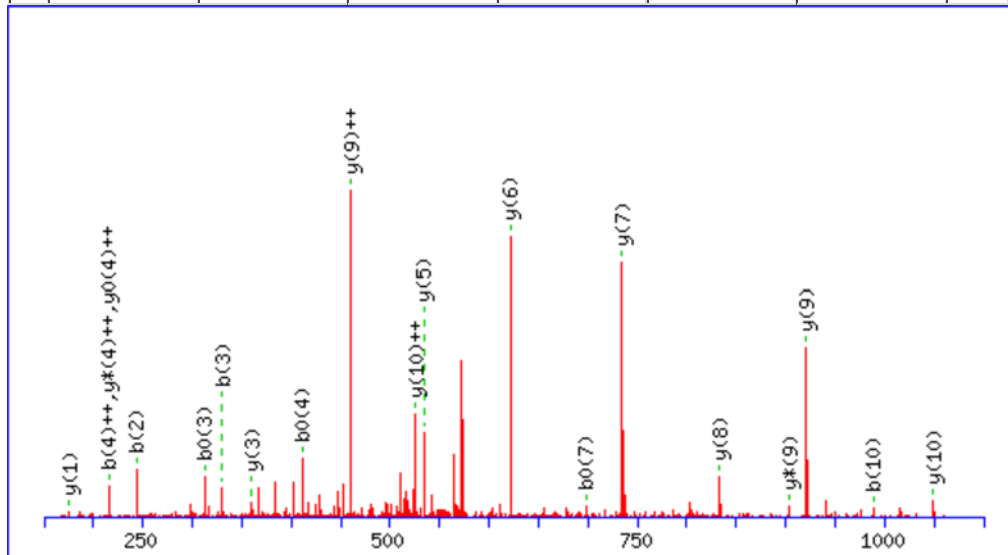

## Peptide View

MS/MS Fragmentation of **NPVLQQDAHSSVTITPQR**

Found in **IPI00410488**, Tax\_Id=9606 Gene\_Symbol=CD276 Isoform 1 of CD276 antigen

Experiment: 39 - OPC-3 Fraction: OPC-3

Match to Query 14965: 1990.026448 from(996.020500,2+)

Title: OECHL100317\_05.10073.10073.2.dta

Data file \\Boromir\masse\Data LTQ-Orbitrap\Chrystelle Lacroix\Etude clinique sJPU\OECHL100317\_05.raw

**Monoisotopic mass of neutral peptide Mr(calc):** 1990.023209 **Fixed modifications:** Carbamidomethyl (C) (apply to specified residues or termini only) **Ions Score:** 84

**Expect:** 4.5e-007 **Matches :** 43/186 fragment ions using 81 most intense peaks ([help](#))

| # | b          | b <sup>++</sup> | b <sup>*</sup> | b <sup>*++</sup> | b <sup>0</sup> | b <sup>0++</sup> | Seq. | y | y <sup>++</sup> | y <sup>*</sup> | y <sup>*++</sup> | y <sup>0</sup> | y <sup>0++</sup> | #  |
|---|------------|-----------------|----------------|------------------|----------------|------------------|------|---|-----------------|----------------|------------------|----------------|------------------|----|
| 1 | 115.050203 | 58.028740       | 98.023654      | 49.515465        |                |                  | N    |   |                 |                |                  |                |                  | 18 |

|    |             |            |             |            |             |            |  |   |             |            |             |            |             |            |    |
|----|-------------|------------|-------------|------------|-------------|------------|--|---|-------------|------------|-------------|------------|-------------|------------|----|
| 2  | 212.102967  | 106.555121 | 195.076418  | 98.041847  |             |            |  | P | 1876.987553 | 938.997415 | 1859.961004 | 930.484140 | 1858.976988 | 929.992132 | 17 |
| 3  | 311.171381  | 156.089328 | 294.144832  | 147.576054 |             |            |  | V | 1779.934789 | 890.471033 | 1762.908240 | 881.957758 | 1761.924224 | 881.465750 | 16 |
| 4  | 424.255445  | 212.631361 | 407.228896  | 204.118086 |             |            |  | L | 1680.866375 | 840.936826 | 1663.839826 | 832.423551 | 1662.855810 | 831.931543 | 15 |
| 5  | 552.314023  | 276.660650 | 535.287474  | 268.147375 |             |            |  | Q | 1567.782311 | 784.394794 | 1550.755762 | 775.881519 | 1549.771746 | 775.389511 | 14 |
| 6  | 680.372601  | 340.689939 | 663.346052  | 332.176664 |             |            |  | Q | 1439.723733 | 720.365505 | 1422.697184 | 711.852230 | 1421.713168 | 711.360222 | 13 |
| 7  | 795.399544  | 398.203410 | 778.372995  | 389.690136 | 777.388979  | 389.198128 |  | D | 1311.665155 | 656.336215 | 1294.638606 | 647.822941 | 1293.654590 | 647.330933 | 12 |
| 8  | 866.436658  | 433.721967 | 849.410109  | 425.208693 | 848.426093  | 424.716685 |  | A | 1196.638212 | 598.822744 | 1179.611663 | 590.309470 | 1178.627647 | 589.817462 | 11 |
| 9  | 1003.495570 | 502.251423 | 986.469021  | 493.738149 | 985.485005  | 493.246141 |  | H | 1125.601098 | 563.304187 | 1108.574549 | 554.790913 | 1107.590533 | 554.298905 | 10 |
| 10 | 1090.527598 | 545.767437 | 1073.501049 | 537.254163 | 1072.517033 | 536.762155 |  | S | 988.542186  | 494.774731 | 971.515637  | 486.261457 | 970.531621  | 485.769449 | 9  |
| 11 | 1177.559626 | 589.283451 | 1160.533077 | 580.770177 | 1159.549061 | 580.278169 |  | S | 901.510158  | 451.258717 | 884.483609  | 442.745443 | 883.499593  | 442.253435 | 8  |
| 12 | 1276.628040 | 638.817658 | 1259.601491 | 630.304384 | 1258.617475 | 629.812376 |  | V | 814.478130  | 407.742703 | 797.451581  | 399.229428 | 796.467565  | 398.737420 | 7  |
| 13 | 1377.675719 | 689.341498 | 1360.649170 | 680.828223 | 1359.665154 | 680.336215 |  | T | 715.409716  | 358.208496 | 698.383167  | 349.695221 | 697.399151  | 349.203213 | 6  |
| 14 | 1490.759783 | 745.883530 | 1473.733234 | 737.370255 | 1472.749218 | 736.878247 |  | I | 614.362037  | 307.684656 | 597.335488  | 299.171382 | 596.351472  | 298.679374 | 5  |
| 15 | 1591.807462 | 796.407369 | 1574.780913 | 787.894095 | 1573.796897 | 787.402087 |  | T | 501.277973  | 251.142624 | 484.251424  | 242.629350 | 483.267408  | 242.137342 | 4  |
| 16 | 1688.860226 | 844.933751 | 1671.833677 | 836.420477 | 1670.849661 | 835.928469 |  | P | 400.230294  | 200.618785 | 383.203745  | 192.105510 |             |            | 3  |
| 17 | 1816.918804 | 908.963040 | 1799.892255 | 900.449766 | 1798.908239 | 899.957758 |  | Q | 303.177530  | 152.092403 | 286.150981  | 143.579128 |             |            | 2  |
| 18 |             |            |             |            |             |            |  | R | 175.118952  | 88.063114  | 158.092403  | 79.549839  |             |            | 1  |

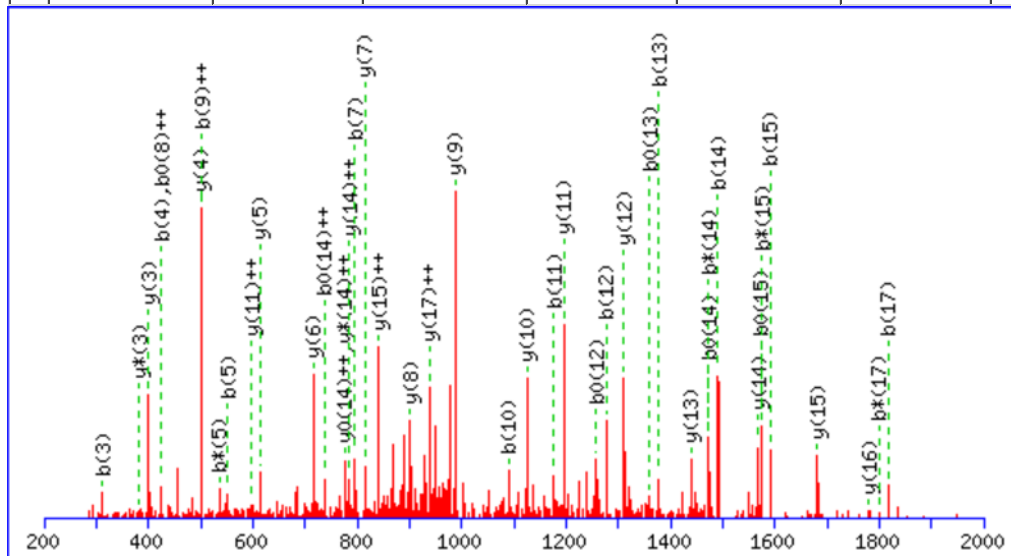

## Peptide View

MS/MS Fragmentation of **CQCPAGAALQADGR**

Found in **IPI00010737**, Tax\_Id=9606 Gene\_Symbol=THBD Thrombomodulin

Experiment: 39 - OPC-3 Fraction: OPC-3

Match to Query 10374: 1473.646048 from(737.830300,2+)

Title: OECHL100317\_05.7977.7977.2.dta

Data file \\Boromir\masse\Data LTQ-Orbitrap\Chrystelle Lacroix\Etude clinique sJPU\OECHL100317\_05.raw

**Monoisotopic mass of neutral peptide Mr(calc):** 1473.645279**Fixed modifications:** Carbamidomethyl (C) (apply to specified residues or termini only)**Ions Score:** 62

**Expect:** 3.1e-005**Matches :** 21/128 fragment ions using 39 most intense peaks ([help](#))

| #  | b                  | b <sup>++</sup>   | b*                | b <sup>*++</sup> | b <sup>0</sup> | b <sup>0++</sup> | Seq. | y                  | y <sup>++</sup>   | y*          | y <sup>*++</sup> | y <sup>0</sup> | y <sup>0++</sup> | #  |
|----|--------------------|-------------------|-------------------|------------------|----------------|------------------|------|--------------------|-------------------|-------------|------------------|----------------|------------------|----|
| 1  | 161.037925         | 81.022600         |                   |                  |                |                  | C    |                    |                   |             |                  |                |                  | 14 |
| 2  | <b>289.096503</b>  | 145.051890        | <b>272.069954</b> | 136.538615       |                |                  | Q    | 1314.621912        | 657.814594        | 1297.595363 | 649.301320       | 1296.611347    | 648.809312       | 13 |
| 3  | <b>449.127152</b>  | 225.067214        | 432.100603        | 216.553940       |                |                  | C    | <b>1186.563334</b> | <b>593.785305</b> | 1169.536785 | 585.272031       | 1168.552769    | 584.780023       | 12 |
| 4  | <b>546.179916</b>  | 273.593596        | 529.153367        | 265.080322       |                |                  | P    | <b>1026.532685</b> | 513.769981        | 1009.506136 | 505.256706       | 1008.522120    | 504.764698       | 11 |
| 5  | <b>617.217030</b>  | 309.112153        | 600.190481        | 300.598879       |                |                  | A    | <b>929.479921</b>  | 465.243599        | 912.453372  | 456.730324       | 911.469356     | 456.238316       | 10 |
| 6  | 674.238494         | <b>337.622885</b> | 657.211945        | 329.109611       |                |                  | G    | <b>858.442807</b>  | 429.725042        | 841.416258  | 421.211767       | 840.432242     | 420.719759       | 9  |
| 7  | 745.275608         | 373.141442        | 728.249059        | 364.628168       |                |                  | A    | 801.421343         | 401.214310        | 784.394794  | 392.701035       | 783.410778     | 392.209027       | 8  |
| 8  | <b>816.312722</b>  | 408.659999        | 799.286173        | 400.146725       |                |                  | A    | <b>730.384229</b>  | 365.695753        | 713.357680  | 357.182478       | 712.373664     | 356.690470       | 7  |
| 9  | <b>929.396786</b>  | 465.202031        | 912.370237        | 456.688757       |                |                  | L    | <b>659.347115</b>  | 330.177196        | 642.320566  | 321.663921       | 641.336550     | 321.171913       | 6  |
| 10 | <b>1057.455364</b> | 529.231320        | 1040.428815       | 520.718046       |                |                  | Q    | <b>546.263051</b>  | 273.635164        | 529.236502  | 265.121889       | 528.252486     | 264.629881       | 5  |
| 11 | 1128.492478        | 564.749877        | 1111.465929       | 556.236603       |                |                  | A    | <b>418.204473</b>  | 209.605874        | 401.177924  | 201.092600       | 400.193908     | 200.600592       | 4  |
| 12 | <b>1243.519421</b> | 622.263349        | 1226.492872       | 613.750074       | 1225.508856    | 613.258066       | D    | <b>347.167359</b>  | 174.087317        | 330.140810  | 165.574043       | 329.156794     | 165.082035       | 3  |
| 13 | 1300.540885        | 650.774081        | 1283.514336       | 642.260806       | 1282.530320    | 641.768798       | G    | <b>232.140416</b>  | 116.573846        | 215.113867  | 108.060571       |                |                  | 2  |
| 14 |                    |                   |                   |                  |                |                  | R    | 175.118952         | 88.063114         | 158.092403  | 79.549839        |                |                  | 1  |

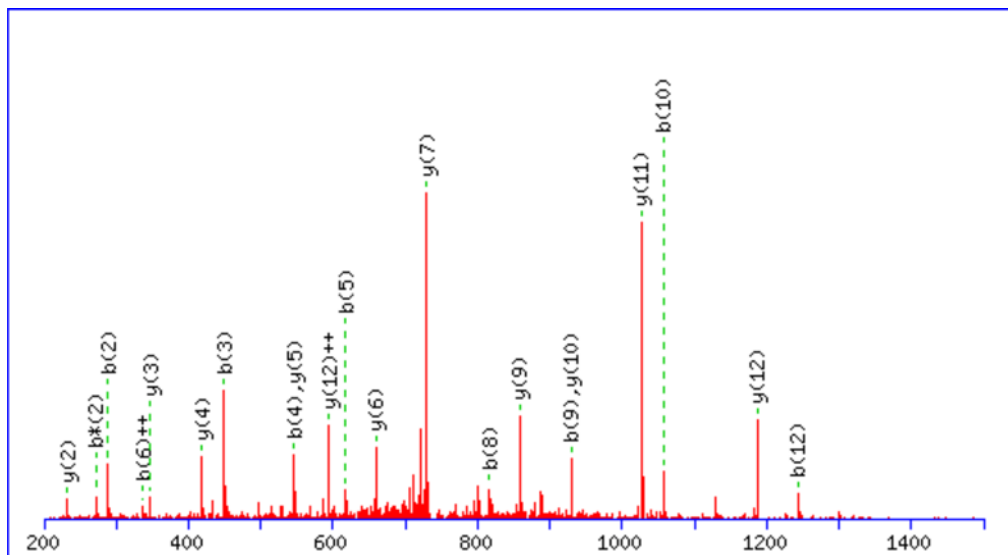

## Peptide View

MS/MS Fragmentation of **KAGPCEQAGSPCR**

Found in **IPI00028381**, Tax\_Id=9606 Gene\_Symbol=DLK2 Isoform 1 of Protein delta homolog 2

**Experiment:** 39 - OPC-3 **Fraction:** OPC-3

Match to Query 9691: 1416.624048 from(709.319300,2+)

Title: OECHL100317\_05.2329.2329.2.dta

Data file \\Boromir\masse\Data LTQ-Orbitrap\Chrystelle Lacroix\Etude clinique sJPU\OECHL100317\_05.raw

**Monoisotopic mass of neutral peptide Mr(calc):** 1416.623810 **Fixed modifications:** Carbamidomethyl (C) (apply to specified residues or termini only) **Ions Score:** 84

**Expect:** 2.4e-007 **Matches :** 21/128 fragment ions using 39 most intense peaks ([help](#))

| # | b          | b <sup>++</sup> | b <sup>*</sup> | b <sup>*++</sup> | b <sup>0</sup> | b <sup>0++</sup> | Seq.     | y                  | y <sup>++</sup>   | y <sup>*</sup>     | y <sup>*++</sup> | y <sup>0</sup>    | y <sup>0++</sup> | #         |
|---|------------|-----------------|----------------|------------------|----------------|------------------|----------|--------------------|-------------------|--------------------|------------------|-------------------|------------------|-----------|
| 1 | 129.102239 | 65.054757       | 112.075690     | 56.541483        |                |                  | <b>K</b> |                    |                   |                    |                  |                   |                  | <b>13</b> |
| 2 | 200.139353 | 100.573315      | 183.112804     | 92.060040        |                |                  | <b>A</b> | <b>1289.536133</b> | <b>645.271705</b> | 1272.509584        | 636.758430       | 1271.525568       | 636.266422       | <b>12</b> |
| 3 | 257.160817 | 129.084047      | 240.134268     | 120.570772       |                |                  | <b>G</b> | <b>1218.499019</b> | 609.753148        | 1201.472470        | 601.239873       | 1200.488454       | 600.747865       | <b>11</b> |
| 4 | 354.213581 | 177.610429      | 337.187032     | 169.097154       |                |                  | <b>P</b> | <b>1161.477555</b> | <b>581.242416</b> | 1144.451006        | 572.729141       | 1143.466990       | 572.237133       | <b>10</b> |
| 5 | 514.244230 | 257.625753      | 497.217681     | 249.112479       |                |                  | <b>C</b> | <b>1064.424791</b> | 532.716034        | <b>1047.398242</b> | 524.202759       | 1046.414226       | 523.710751       | <b>9</b>  |
| 6 | 643.286823 | 322.147050      | 626.260274     | 313.633775       | 625.276258     | 313.141767       | <b>E</b> | <b>904.394142</b>  | 452.700709        | 887.367593         | 444.187434       | <b>886.383577</b> | 443.695427       | <b>8</b>  |



|    |             |            |             |            |             |            |   |            |            |            |            |            |            |   |
|----|-------------|------------|-------------|------------|-------------|------------|---|------------|------------|------------|------------|------------|------------|---|
| 7  | 771.345401  | 386.176339 | 754.318852  | 377.663064 | 753.334836  | 377.171056 | Q | 775.351549 | 388.179413 | 758.325000 | 379.666138 | 757.340984 | 379.174130 | 7 |
| 8  | 842.382515  | 421.694896 | 825.355966  | 413.181621 | 824.371950  | 412.689613 | A | 647.292971 | 324.150124 | 630.266422 | 315.636849 | 629.282406 | 315.144841 | 6 |
| 9  | 899.403979  | 450.205628 | 882.377430  | 441.692353 | 881.393414  | 441.200345 | G | 576.255857 | 288.631567 | 559.229308 | 280.118292 | 558.245292 | 279.626284 | 5 |
| 10 | 986.436007  | 493.721642 | 969.409458  | 485.208367 | 968.425442  | 484.716359 | S | 519.234393 | 260.120835 | 502.207844 | 251.607560 | 501.223828 | 251.115552 | 4 |
| 11 | 1083.488771 | 542.248024 | 1066.462222 | 533.734749 | 1065.478206 | 533.242741 | P | 432.202365 | 216.604820 | 415.175816 | 208.091546 |            |            | 3 |
| 12 | 1243.519420 | 622.263348 | 1226.492871 | 613.750074 | 1225.508855 | 613.258066 | C | 335.149601 | 168.078438 | 318.123052 | 159.565164 |            |            | 2 |
| 13 |             |            |             |            |             |            | R | 175.118952 | 88.063114  | 158.092403 | 79.549839  |            |            | 1 |

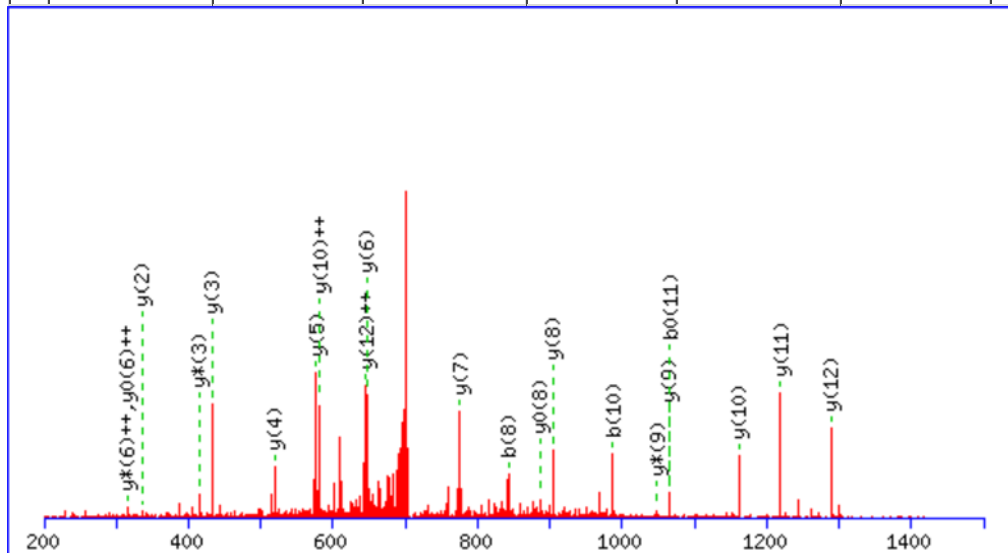

## Peptide View

MS/MS Fragmentation of **AADHDVGSELPPEGVLGALLR**

Found in **IPI00002280**, Tax\_Id=9606 Gene\_Symbol=PCSK1N ProSAAS

**Experiment:** 39 - OPC-3 **Fraction:** OPC-3

Match to Query 15717: 2115.097448 from(1058.556000,2+)

Title: OECHL100317\_05.20857.20857.2.dta

Data file \\Boromir\masse\Data LTQ-Orbitrap\Chrystelle Lacroix\Etude clinique sJPU\OECHL100317\_05.raw

**Monoisotopic mass of neutral peptide Mr(calc):** 2115.096024 **Fixed modifications:** Carbamidomethyl (C) (apply to specified residues or termini only) **Ions Score:** 83

**Expect:** 6.2e-007 **Matches :** 25/180 fragment ions using 34 most intense peaks ([help](#))

| #         | <b>b</b>           | <b>b<sup>++</sup></b> | <b>b<sup>0</sup></b> | <b>b<sup>0++</sup></b> | Seq.     | <b>y</b>           | <b>y<sup>++</sup></b> | <b>y*</b>   | <b>y<sup>*++</sup></b> | <b>y<sup>0</sup></b> | <b>y<sup>0++</sup></b> | #         |
|-----------|--------------------|-----------------------|----------------------|------------------------|----------|--------------------|-----------------------|-------------|------------------------|----------------------|------------------------|-----------|
| <b>1</b>  | 72.044390          | 36.525833             |                      |                        | <b>A</b> |                    |                       |             |                        |                      |                        | <b>21</b> |
| <b>2</b>  | 143.081504         | 72.044390             |                      |                        | <b>A</b> | 2045.066196        | 1023.036736           | 2028.039647 | 1014.523461            | 2027.055631          | 1014.031453            | <b>20</b> |
| <b>3</b>  | 258.108447         | 129.557862            | 240.097882           | 120.552579             | <b>D</b> | 1974.029082        | 987.518179            | 1957.002533 | 979.004904             | 1956.018517          | 978.512896             | <b>19</b> |
| <b>4</b>  | <b>395.167359</b>  | 198.087317            | 377.156794           | 189.082035             | <b>H</b> | 1859.002139        | 930.004707            | 1841.975590 | 921.491433             | 1840.991574          | 920.999425             | <b>18</b> |
| <b>5</b>  | <b>510.194302</b>  | 255.600789            | 492.183737           | 246.595507             | <b>D</b> | <b>1721.943227</b> | 861.475251            | 1704.916678 | 852.961977             | <b>1703.932662</b>   | 852.469969             | <b>17</b> |
| <b>6</b>  | <b>609.262716</b>  | 305.134996            | 591.252151           | 296.129714             | <b>V</b> | <b>1606.916284</b> | 803.961780            | 1589.889735 | 795.448505             | 1588.905719          | 794.956497             | <b>16</b> |
| <b>7</b>  | <b>666.284180</b>  | 333.645728            | 648.273615           | 324.640446             | <b>G</b> | <b>1507.847870</b> | 754.427573            | 1490.821321 | 745.914298             | 1489.837305          | 745.422290             | <b>15</b> |
| <b>8</b>  | 753.316208         | 377.161742            | <b>735.305643</b>    | <b>368.156460</b>      | <b>S</b> | 1450.826406        | 725.916841            | 1433.799857 | 717.403566             | 1432.815841          | 716.911558             | <b>14</b> |
| <b>9</b>  | <b>882.358801</b>  | 441.683039            | <b>864.348236</b>    | 432.677756             | <b>E</b> | <b>1363.794378</b> | 682.400827            | 1346.767829 | 673.887552             | 1345.783813          | 673.395544             | <b>13</b> |
| <b>10</b> | <b>995.442865</b>  | 498.225071            | 977.432300           | 489.219788             | <b>L</b> | <b>1234.751785</b> | 617.879530            | 1217.725236 | <b>609.366256</b>      | 1216.741220          | <b>608.874248</b>      | <b>12</b> |
| <b>11</b> | 1092.495629        | 546.751453            | 1074.485064          | 537.746170             | <b>P</b> | <b>1121.667721</b> | 561.337498            | 1104.641172 | 552.824224             | 1103.657156          | 552.332216             | <b>11</b> |
| <b>12</b> | 1189.548393        | 595.277835            | 1171.537828          | 586.272552             | <b>P</b> | <b>1024.614957</b> | 512.811116            | 1007.588408 | 504.297842             | 1006.604392          | 503.805834             | <b>10</b> |
| <b>13</b> | 1318.590986        | 659.799131            | 1300.580421          | 650.793848             | <b>E</b> | 927.562193         | 464.284734            | 910.535644  | 455.771460             | 909.551628           | 455.279452             | <b>9</b>  |
| <b>14</b> | 1375.612450        | 688.309863            | 1357.601885          | 679.304580             | <b>G</b> | <b>798.519600</b>  | 399.763438            | 781.493051  | 391.250163             |                      |                        | <b>8</b>  |
| <b>15</b> | 1474.680864        | 737.844070            | 1456.670299          | 728.838787             | <b>V</b> | 741.498136         | 371.252706            | 724.471587  | 362.739431             |                      |                        | <b>7</b>  |
| <b>16</b> | <b>1587.764928</b> | 794.386102            | 1569.754363          | 785.380819             | <b>L</b> | <b>642.429722</b>  | 321.718499            | 625.403173  | 313.205224             |                      |                        | <b>6</b>  |
| <b>17</b> | <b>1644.786392</b> | 822.896834            | 1626.775827          | 813.891551             | <b>G</b> | 529.345658         | 265.176467            | 512.319109  | 256.663192             |                      |                        | <b>5</b>  |
| <b>18</b> | 1715.823506        | 858.415391            | 1697.812941          | 849.410108             | <b>A</b> | 472.324194         | 236.665735            | 455.297645  | 228.152460             |                      |                        | <b>4</b>  |
| <b>19</b> | <b>1828.907570</b> | 914.957423            | 1810.897005          | 905.952140             | <b>L</b> | 401.287080         | 201.147178            | 384.260531  | 192.633903             |                      |                        | <b>3</b>  |
| <b>20</b> | <b>1941.991634</b> | 971.499455            | 1923.981069          | 962.494172             | <b>L</b> | 288.203016         | 144.605146            | 271.176467  | 136.091872             |                      |                        | <b>2</b>  |
| <b>21</b> |                    |                       |                      |                        | <b>R</b> | 175.118952         | 88.063114             | 158.092403  | 79.549840              |                      |                        | <b>1</b>  |

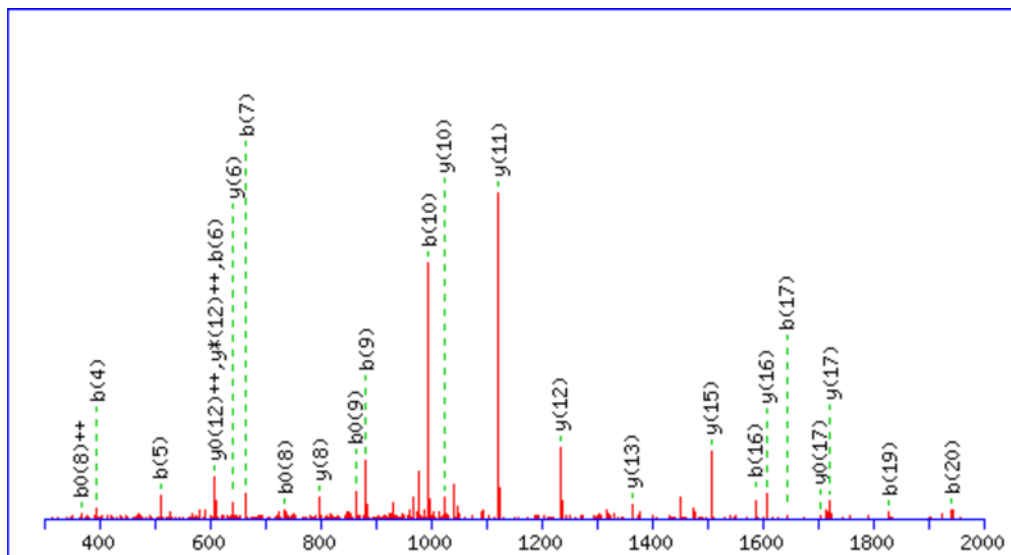

## Peptide View

MS/MS Fragmentation of **HSFKGEECPAGSHR**

Found in **IPI00021970**, Tax\_Id=9606 Gene\_Symbol=MGC31957;TNFRSF10C TNFRSF10C protein

**Experiment:** 39 - OPC-3 **Fraction:** OPC-3

Match to Query 11625: 1597.706048 from(799.860300,2+)

Title: OECHL100317\_05.2480.2480.2.dta

Data file \\Boromir\masse\Data LTQ-Orbitrap\Chrystelle Lacroix\Etude clinique sJPU\OECHL100317\_05.raw

**Monoisotopic mass of neutral peptide Mr(calc):** 1597.705566 **Fixed modifications:** Carbamidomethyl (C) (apply to specified residues or termini only) **Ions Score:** 62

**Expect:** 3.4e-005 **Matches :** 33/144 fragment ions using 53 most intense peaks ([help](#))

| # | b                 | b <sup>++</sup> | b*                | b* <sup>++</sup> | b <sup>0</sup>    | b <sup>0++</sup> | Seq.     | y                  | y <sup>++</sup>   | y*          | y* <sup>++</sup>  | y <sup>0</sup> | y <sup>0++</sup> | #         |
|---|-------------------|-----------------|-------------------|------------------|-------------------|------------------|----------|--------------------|-------------------|-------------|-------------------|----------------|------------------|-----------|
| 1 | 138.066188        | 69.536732       |                   |                  |                   |                  | <b>H</b> |                    |                   |             |                   |                |                  | <b>14</b> |
| 2 | <b>225.098216</b> | 113.052746      |                   |                  | 207.087651        | 104.047463       | <b>S</b> | <b>1461.653938</b> | <b>731.330607</b> | 1444.627389 | 722.817333        | 1443.643373    | 722.325325       | <b>13</b> |
| 3 | <b>372.166630</b> | 186.586953      |                   |                  | <b>354.156065</b> | 177.581671       | <b>F</b> | <b>1374.621910</b> | <b>687.814593</b> | 1357.595361 | 679.301319        | 1356.611345    | 678.809311       | <b>12</b> |
| 4 | <b>500.261593</b> | 250.634435      | <b>483.235044</b> | 242.121160       | <b>482.251028</b> | 241.629152       | <b>K</b> | <b>1227.553496</b> | <b>614.280386</b> | 1210.526947 | <b>605.767112</b> | 1209.542931    | 605.275104       | <b>11</b> |
| 5 | 557.283057        | 279.145167      | 540.256508        | 270.631892       | 539.272492        | 270.139884       | <b>G</b> | <b>1099.458533</b> | 550.232905        | 1082.431984 | 541.719630        | 1081.447968    | 541.227622       | <b>10</b> |
| 6 | <b>686.325650</b> | 343.666463      | 669.299101        | 335.153189       | 668.315085        | 334.661181       | <b>E</b> | 1042.437069        | 521.722173        | 1025.410520 | 513.208898        | 1024.426504    | 512.716890       | <b>9</b>  |

|    |             |            |             |            |             |            |   |            |            |            |            |            |            |   |
|----|-------------|------------|-------------|------------|-------------|------------|---|------------|------------|------------|------------|------------|------------|---|
| 7  | 815.368243  | 408.187760 | 798.341694  | 399.674485 | 797.357678  | 399.182477 | E | 913.394476 | 457.200876 | 896.367927 | 448.687602 | 895.383911 | 448.195594 | 8 |
| 8  | 975.398892  | 488.203084 | 958.372343  | 479.689810 | 957.388327  | 479.197802 | C | 784.351883 | 392.679580 | 767.325334 | 384.166305 | 766.341318 | 383.674297 | 7 |
| 9  | 1072.451656 | 536.729466 | 1055.425107 | 528.216192 | 1054.441091 | 527.724184 | P | 624.321234 | 312.664255 | 607.294685 | 304.150981 | 606.310669 | 303.658973 | 6 |
| 10 | 1143.488770 | 572.248023 | 1126.462221 | 563.734749 | 1125.478205 | 563.242741 | A | 527.268470 | 264.137873 | 510.241921 | 255.624598 | 509.257905 | 255.132590 | 5 |
| 11 | 1200.510234 | 600.758755 | 1183.483685 | 592.245481 | 1182.499669 | 591.753473 | G | 456.231356 | 228.619316 | 439.204807 | 220.106041 | 438.220791 | 219.614033 | 4 |
| 12 | 1287.542262 | 644.274769 | 1270.515713 | 635.761495 | 1269.531697 | 635.269487 | S | 399.209892 | 200.108584 | 382.183343 | 191.595309 | 381.199327 | 191.103301 | 3 |
| 13 | 1424.601174 | 712.804225 | 1407.574625 | 704.290951 | 1406.590609 | 703.798943 | H | 312.177864 | 156.592570 | 295.151315 | 148.079295 |            |            | 2 |
| 14 |             |            |             |            |             |            | R | 175.118952 | 88.063114  | 158.092403 | 79.549839  |            |            | 1 |

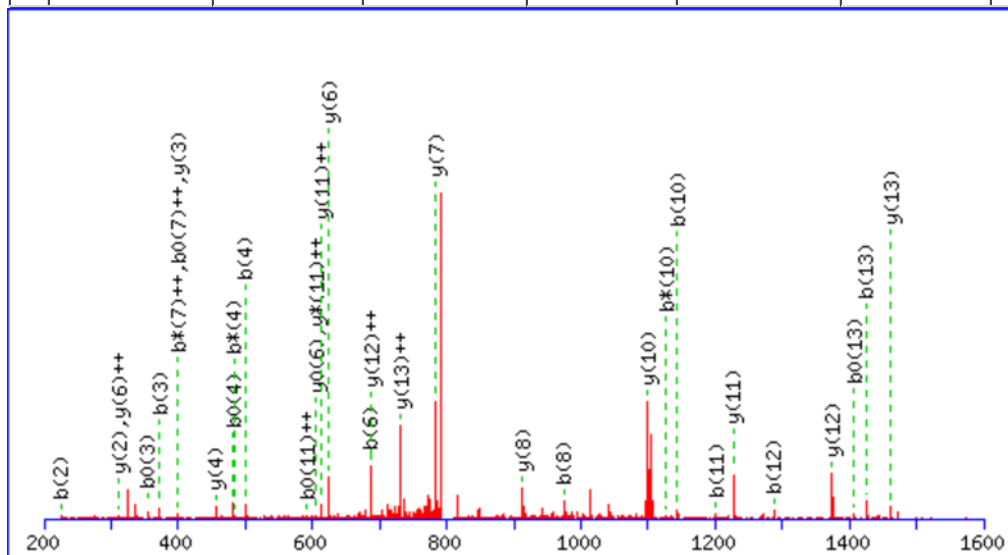

## Peptide View

MS/MS Fragmentation of **YSGSEGSTQTLTKGELK**

Found in **IP100017526**, Tax\_Id=9606 Gene\_Symbol=S100P Protein S100-P

**Experiment:** 39 - OPC-3 **Fraction:** OPC-3

Match to Query 13743: 1784.880448 from(893.447500,2+)

Title: OECHL100317\_05.8067.8067.2.dta

Data file \\Boromir\masse\Data LTQ-Orbitrap\Chrystelle Lacroix\Etude clinique sJPU\OECHL100317\_05.raw

**Monoisotopic mass of neutral peptide Mr(calc):** 1784.879211 **Fixed modifications:** Carbamidomethyl (C) (apply to specified residues or termini only) **Ions Score:** 69

**Expect:** 2e-005**Matches :** 25/170 fragment ions using 45 most intense peaks ([help](#))

| #  | b           | b <sup>++</sup> | b*          | b <sup>*++</sup> | b <sup>0</sup> | b <sup>0++</sup> | Seq. | y           | y <sup>++</sup> | y*          | y <sup>*++</sup> | y <sup>0</sup> | y <sup>0++</sup> | #  |
|----|-------------|-----------------|-------------|------------------|----------------|------------------|------|-------------|-----------------|-------------|------------------|----------------|------------------|----|
| 1  | 164.070605  | 82.538940       |             |                  |                |                  | Y    |             |                 |             |                  |                |                  | 17 |
| 2  | 251.102633  | 126.054954      |             |                  | 233.092068     | 117.049672       | S    | 1622.823172 | 811.915224      | 1605.796623 | 803.401950       | 1604.812607    | 802.909941       | 16 |
| 3  | 308.124097  | 154.565687      |             |                  | 290.113532     | 145.560404       | G    | 1535.791144 | 768.399210      | 1518.764595 | 759.885936       | 1517.780579    | 759.393928       | 15 |
| 4  | 395.156125  | 198.081701      |             |                  | 377.145560     | 189.076418       | S    | 1478.769680 | 739.888478      | 1461.743131 | 731.375204       | 1460.759115    | 730.883195       | 14 |
| 5  | 524.198718  | 262.602997      |             |                  | 506.188153     | 253.597715       | E    | 1391.737652 | 696.372464      | 1374.711103 | 687.859190       | 1373.727087    | 687.367182       | 13 |
| 6  | 581.220182  | 291.113729      |             |                  | 563.209617     | 282.108447       | G    | 1262.695059 | 631.851167      | 1245.668510 | 623.337893       | 1244.684494    | 622.845885       | 12 |
| 7  | 668.252210  | 334.629743      |             |                  | 650.241645     | 325.624461       | S    | 1205.673595 | 603.340436      | 1188.647046 | 594.827161       | 1187.663030    | 594.335153       | 11 |
| 8  | 769.299889  | 385.153583      |             |                  | 751.289324     | 376.148300       | T    | 1118.641567 | 559.824421      | 1101.615018 | 551.311147       | 1100.631002    | 550.819139       | 10 |
| 9  | 897.358467  | 449.182872      | 880.331918  | 440.669597       | 879.347902     | 440.177589       | Q    | 1017.593888 | 509.300582      | 1000.567339 | 500.787307       | 999.583323     | 500.295299       | 9  |
| 10 | 998.406146  | 499.706711      | 981.379597  | 491.193437       | 980.395581     | 490.701429       | T    | 889.535310  | 445.271293      | 872.508761  | 436.758018       | 871.524745     | 436.266010       | 8  |
| 11 | 1111.490210 | 556.248743      | 1094.463661 | 547.735469       | 1093.479645    | 547.243461       | L    | 788.487631  | 394.747453      | 771.461082  | 386.234179       | 770.477066     | 385.742171       | 7  |
| 12 | 1212.537889 | 606.772583      | 1195.511340 | 598.259308       | 1194.527324    | 597.767300       | T    | 675.403567  | 338.205421      | 658.377018  | 329.692147       | 657.393002     | 329.200139       | 6  |
| 13 | 1340.632852 | 670.820064      | 1323.606303 | 662.306790       | 1322.622287    | 661.814782       | K    | 574.355888  | 287.681582      | 557.329339  | 279.168307       | 556.345323     | 278.676299       | 5  |
| 14 | 1397.654316 | 699.330796      | 1380.627767 | 690.817522       | 1379.643751    | 690.325514       | G    | 446.260925  | 223.634100      | 429.234376  | 215.120826       | 428.250360     | 214.628818       | 4  |
| 15 | 1526.696909 | 763.852093      | 1509.670360 | 755.338818       | 1508.686344    | 754.846810       | E    | 389.239461  | 195.123368      | 372.212912  | 186.610094       | 371.228896     | 186.118086       | 3  |
| 16 | 1639.780973 | 820.394124      | 1622.754424 | 811.880850       | 1621.770408    | 811.388842       | L    | 260.196868  | 130.602072      | 243.170319  | 122.088797       |                |                  | 2  |
| 17 |             |                 |             |                  |                |                  | K    | 147.112804  | 74.060040       | 130.086255  | 65.546765        |                |                  | 1  |

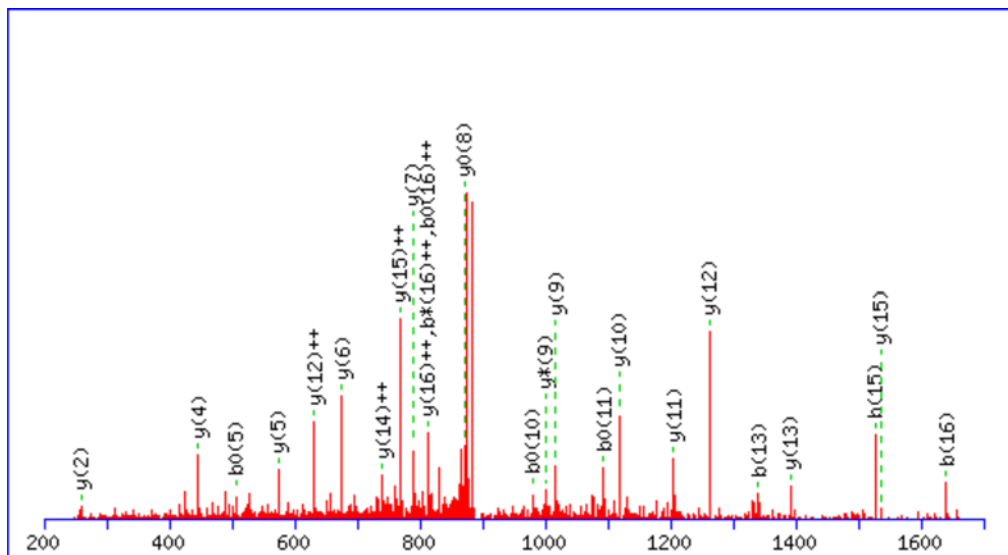

## Peptide View

MS/MS Fragmentation of **AQLDSADIPKAR**

Found in **IPI00026303**, Tax\_Id=9606 Gene\_Symbol=PI15 Peptidase inhibitor 15

**Experiment:** 39 - OPC-3 **Fraction:** OPC-3

Match to Query 8493: 1283.683848 from(642.849200,2+)

Title: OECHL100317\_05.8301.8301.2.dta

Data file \\Boromir\masse\Data LTQ-Orbitrap\Chrystelle Lacroix\Etude clinique sJPU\OECHL100317\_05.raw

**Monoisotopic mass of neutral peptide Mr(calc):** 1283.683334 **Fixed modifications:** Carbamidomethyl (C) (apply to specified residues or termini only) **Ions Score:** 54

**Expect:** 0.00031 **Matches :** 20/114 fragment ions using 44 most intense peaks ([help](#))

| # | b                 | b <sup>++</sup> | b*                | b* <sup>++</sup> | b <sup>0</sup> | b <sup>0++</sup> | Seq. | y                  | y <sup>++</sup>   | y*                 | y* <sup>++</sup> | y <sup>0</sup>     | y <sup>0++</sup> | #  |
|---|-------------------|-----------------|-------------------|------------------|----------------|------------------|------|--------------------|-------------------|--------------------|------------------|--------------------|------------------|----|
| 1 | 72.044390         | 36.525833       |                   |                  |                |                  | A    |                    |                   |                    |                  |                    |                  | 12 |
| 2 | <b>200.102968</b> | 100.555122      | <b>183.076419</b> | 92.041848        |                |                  | Q    | 1213.653527        | 607.330402        | 1196.626978        | 598.817127       | 1195.642962        | 598.325119       | 11 |
| 3 | <b>313.187032</b> | 157.097154      | 296.160483        | 148.583879       |                |                  | L    | <b>1085.594949</b> | <b>543.301113</b> | <b>1068.568400</b> | 534.787838       | <b>1067.584384</b> | 534.295830       | 10 |
| 4 | <b>428.213975</b> | 214.610626      | 411.187426        | 206.097351       | 410.203410     | 205.605343       | D    | <b>972.510885</b>  | <b>486.759081</b> | 955.484336         | 478.245806       | 954.500320         | 477.753798       | 9  |
| 5 | 515.246003        | 258.126640      | 498.219454        | 249.613365       | 497.235438     | 249.121357       | S    | <b>857.483942</b>  | <b>429.245609</b> | 840.457393         | 420.732335       | 839.473377         | 420.240327       | 8  |
| 6 | 586.283117        | 293.645197      | 569.256568        | 285.131922       | 568.272552     | 284.639914       | A    | <b>770.451914</b>  | 385.729595        | 753.425365         | 377.216321       | 752.441349         | 376.724313       | 7  |

|    |                   |            |             |            |             |            |          |                   |            |            |            |            |            |          |
|----|-------------------|------------|-------------|------------|-------------|------------|----------|-------------------|------------|------------|------------|------------|------------|----------|
| 7  | <b>701.310060</b> | 351.158668 | 684.283511  | 342.645394 | 683.299495  | 342.153386 | <b>D</b> | <b>699.414800</b> | 350.211038 | 682.388251 | 341.697764 | 681.404235 | 341.205756 | <b>6</b> |
| 8  | <b>814.394124</b> | 407.700700 | 797.367575  | 399.187426 | 796.383559  | 398.695418 | <b>I</b> | <b>584.387857</b> | 292.697567 | 567.361308 | 284.184292 |            |            | <b>5</b> |
| 9  | 911.446888        | 456.227082 | 894.420339  | 447.713808 | 893.436323  | 447.221800 | <b>P</b> | <b>471.303793</b> | 236.155535 | 454.277244 | 227.642260 |            |            | <b>4</b> |
| 10 | 1039.541851       | 520.274564 | 1022.515302 | 511.761289 | 1021.531286 | 511.269281 | <b>K</b> | <b>374.251029</b> | 187.629153 | 357.224480 | 179.115878 |            |            | <b>3</b> |
| 11 | 1110.578965       | 555.793121 | 1093.552416 | 547.279846 | 1092.568400 | 546.787838 | <b>A</b> | <b>246.156066</b> | 123.581671 | 229.129517 | 115.068396 |            |            | <b>2</b> |
| 12 |                   |            |             |            |             |            | <b>R</b> | 175.118952        | 88.063114  | 158.092403 | 79.549839  |            |            | <b>1</b> |

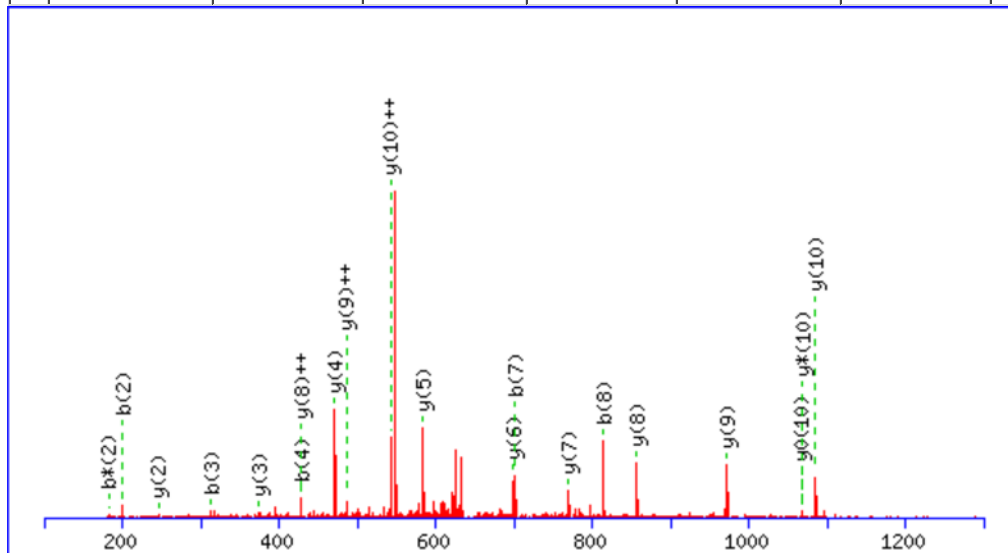

## Peptide View

MS/MS Fragmentation of **LLIYDASNLETGVPSR**

Found in **IP100003111**, Tax\_Id=9606 Gene\_Symbol=LOC652694 Ig kappa chain V-I region AU

**Experiment:** 39 - OPC-3 **Fraction:** OPC-3

Match to Query 13459: 1746.917248 from(874.465900,2+)

Title: OECHL100317\_05.17438.17438.2.dta

Data file \\Boromir\masse\Data LTQ-Orbitrap\Chrystelle Lacroix\Etude clinique sJPU\OECHL100317\_05.raw

**Monoisotopic mass of neutral peptide Mr(calc):** 1746.915192 **Fixed modifications:** Carbamidomethyl (C) (apply to specified residues or termini only) **Ions Score:** 80

**Expect:** 1e-006 **Matches :** 28/156 fragment ions using 45 most intense peaks ([help](#))

| # | <b>b</b> | <b>b<sup>++</sup></b> | <b>b<sup>*</sup></b> | <b>b<sup>*++</sup></b> | <b>b<sup>0</sup></b> | <b>b<sup>0++</sup></b> | Seq. | <b>y</b> | <b>y<sup>++</sup></b> | <b>y<sup>*</sup></b> | <b>y<sup>*++</sup></b> | <b>y<sup>0</sup></b> | <b>y<sup>0++</sup></b> | # |
|---|----------|-----------------------|----------------------|------------------------|----------------------|------------------------|------|----------|-----------------------|----------------------|------------------------|----------------------|------------------------|---|
|---|----------|-----------------------|----------------------|------------------------|----------------------|------------------------|------|----------|-----------------------|----------------------|------------------------|----------------------|------------------------|---|

|    |                    |                   |                    |            |             |            |  |   |                    |                   |             |            |                    |            |  |  |    |
|----|--------------------|-------------------|--------------------|------------|-------------|------------|--|---|--------------------|-------------------|-------------|------------|--------------------|------------|--|--|----|
| 1  | 114.091340         | 57.549308         |                    |            |             |            |  | L |                    |                   |             |            |                    |            |  |  | 16 |
| 2  | 227.175404         | 114.091340        |                    |            |             |            |  | L | 1634.838427        | 817.922852        | 1617.811878 | 809.409577 | 1616.827862        | 808.917569 |  |  | 15 |
| 3  | <b>340.259468</b>  | 170.633372        |                    |            |             |            |  | I | <b>1521.754363</b> | <b>761.380820</b> | 1504.727814 | 752.867545 | 1503.743798        | 752.375537 |  |  | 14 |
| 4  | <b>503.322797</b>  | 252.165036        |                    |            |             |            |  | Y | 1408.670299        | <b>704.838788</b> | 1391.643750 | 696.325513 | <b>1390.659734</b> | 695.833505 |  |  | 13 |
| 5  | <b>618.349740</b>  | 309.678508        |                    |            | 600.339175  | 300.673226 |  | D | <b>1245.606970</b> | 623.307123        | 1228.580421 | 614.793849 | 1227.596405        | 614.301841 |  |  | 12 |
| 6  | <b>689.386854</b>  | 345.197065        |                    |            | 671.376289  | 336.191782 |  | A | <b>1130.580027</b> | 565.793652        | 1113.553478 | 557.280377 | 1112.569462        | 556.788369 |  |  | 11 |
| 7  | 776.418882         | 388.713079        |                    |            | 758.408317  | 379.707796 |  | S | <b>1059.542913</b> | 530.275095        | 1042.516364 | 521.761820 | 1041.532348        | 521.269812 |  |  | 10 |
| 8  | 890.461809         | 445.734542        | <b>873.435260</b>  | 437.221268 | 872.451244  | 436.729260 |  | N | <b>972.510885</b>  | 486.759081        | 955.484336  | 478.245806 | 954.500320         | 477.753798 |  |  | 9  |
| 9  | <b>1003.545873</b> | 502.276574        | 986.519324         | 493.763300 | 985.535308  | 493.271292 |  | L | 858.467958         | 429.737617        | 841.441409  | 421.224343 | 840.457393         | 420.732335 |  |  | 8  |
| 10 | <b>1132.588466</b> | 566.797871        | 1115.561917        | 558.284597 | 1114.577901 | 557.792588 |  | E | <b>745.383894</b>  | 373.195585        | 728.357345  | 364.682311 | 727.373329         | 364.190303 |  |  | 7  |
| 11 | <b>1233.636145</b> | <b>617.321710</b> | 1216.609596        | 608.808436 | 1215.625580 | 608.316428 |  | T | <b>616.341301</b>  | 308.674289        | 599.314752  | 300.161014 | 598.330736         | 299.669006 |  |  | 6  |
| 12 | <b>1290.657609</b> | 645.832442        | 1273.631060        | 637.319168 | 1272.647044 | 636.827160 |  | G | <b>515.293622</b>  | 258.150449        | 498.267073  | 249.637175 | 497.283057         | 249.145167 |  |  | 5  |
| 13 | <b>1389.726023</b> | 695.366649        | <b>1372.699474</b> | 686.853375 | 1371.715458 | 686.361367 |  | V | <b>458.272158</b>  | 229.639717        | 441.245609  | 221.126443 | 440.261593         | 220.634435 |  |  | 4  |
| 14 | <b>1486.778787</b> | 743.893032        | 1469.752238        | 735.379757 | 1468.768222 | 734.887749 |  | P | <b>359.203744</b>  | 180.105510        | 342.177195  | 171.592236 | <b>341.193179</b>  | 171.100228 |  |  | 3  |
| 15 | <b>1573.810815</b> | 787.409046        | 1556.784266        | 778.895771 | 1555.800250 | 778.403763 |  | S | 262.150980         | 131.579128        | 245.124431  | 123.065854 | 244.140415         | 122.573846 |  |  | 2  |
| 16 |                    |                   |                    |            |             |            |  | R | 175.118952         | 88.063114         | 158.092403  | 79.549839  |                    |            |  |  | 1  |

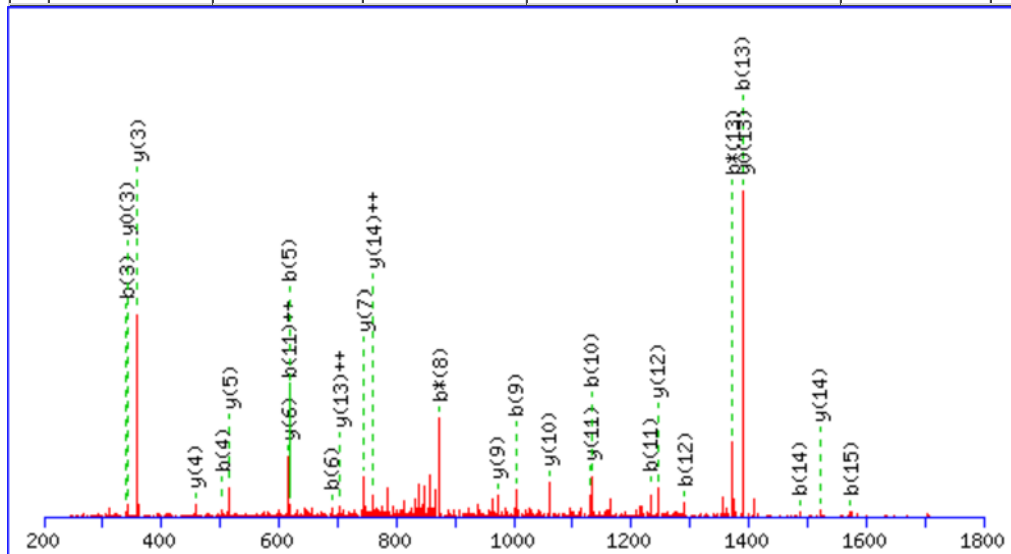



## Peptide View

MS/MS Fragmentation of **DFSLTSSSQTPGATK**

Found in **IPI00291300**, Tax\_Id=9606 Gene\_Symbol=PODXL2 Putative uncharacterized protein PODXL2

**Experiment:** 39 - OPC-3 **Fraction:** OPC-3

Match to Query 10814: 1525.726448 from(763.870500,2+)

Title: OECHL100317\_05.10929.10929.2.dta

Data file \\Boromir\masse\Data LTQ-Orbitrap\Chrystelle Lacroix\Etude clinique sJPU\OECHL100317\_05.raw

**Monoisotopic mass of neutral peptide Mr(calc):** 1525.726028 **Fixed modifications:** Carbamidomethyl (C) (apply to specified residues or termini only) **Ions Score:** 77

**Expect:** 2.2e-006 **Matches :** 27/150 fragment ions using 40 most intense peaks ([help](#))

| #  | b                  | b <sup>++</sup> | b*                 | b <sup>*++</sup> | b <sup>0</sup>     | b <sup>0++</sup> | Seq.     | y                  | y <sup>++</sup>   | y*          | y <sup>*++</sup>  | y <sup>0</sup> | y <sup>0++</sup>  | #         |
|----|--------------------|-----------------|--------------------|------------------|--------------------|------------------|----------|--------------------|-------------------|-------------|-------------------|----------------|-------------------|-----------|
| 1  | 116.034219         | 58.520748       |                    |                  | 98.023654          | 49.515465        | <b>D</b> |                    |                   |             |                   |                |                   | <b>15</b> |
| 2  | <b>263.102633</b>  | 132.054954      |                    |                  | 245.092068         | 123.049672       | <b>F</b> | 1411.706351        | 706.356813        | 1394.679802 | 697.843539        | 1393.695786    | 697.351531        | <b>14</b> |
| 3  | <b>350.134661</b>  | 175.570968      |                    |                  | <b>332.124096</b>  | 166.565686       | <b>S</b> | 1264.637937        | <b>632.822607</b> | 1247.611388 | 624.309332        | 1246.627372    | 623.817324        | <b>13</b> |
| 4  | 463.218725         | 232.113001      |                    |                  | 445.208160         | 223.107718       | <b>L</b> | <b>1177.605909</b> | 589.306592        | 1160.579360 | 580.793318        | 1159.595344    | 580.301310        | <b>12</b> |
| 5  | <b>564.266404</b>  | 282.636840      |                    |                  | <b>546.255839</b>  | 273.631558       | <b>T</b> | <b>1064.521845</b> | 532.764561        | 1047.495296 | 524.251286        | 1046.511280    | 523.759278        | <b>11</b> |
| 6  | <b>651.298432</b>  | 326.152854      |                    |                  | <b>633.287867</b>  | 317.147572       | <b>S</b> | <b>963.474166</b>  | 482.240721        | 946.447617  | <b>473.727446</b> | 945.463601     | <b>473.235438</b> | <b>10</b> |
| 7  | 738.330460         | 369.668868      |                    |                  | 720.319895         | 360.663586       | <b>S</b> | <b>876.442138</b>  | 438.724707        | 859.415589  | 430.211432        | 858.431573     | 429.719424        | <b>9</b>  |
| 8  | <b>825.362488</b>  | 413.184882      |                    |                  | 807.351923         | 404.179599       | <b>S</b> | <b>789.410110</b>  | 395.208693        | 772.383561  | 386.695418        | 771.399545     | 386.203410        | <b>8</b>  |
| 9  | <b>953.421066</b>  | 477.214171      | 936.394517         | 468.700897       | 935.410501         | 468.208889       | <b>Q</b> | <b>702.378082</b>  | 351.692679        | 685.351533  | 343.179404        | 684.367517     | 342.687396        | <b>7</b>  |
| 10 | <b>1054.468745</b> | 527.738010      | 1037.442196        | 519.224736       | 1036.458180        | 518.732728       | <b>T</b> | <b>574.319504</b>  | 287.663390        | 557.292955  | 279.150115        | 556.308939     | 278.658107        | <b>6</b>  |
| 11 | 1151.521509        | 576.264392      | 1134.494960        | 567.751118       | 1133.510944        | 567.259110       | <b>P</b> | <b>473.271825</b>  | 237.139550        | 456.245276  | 228.626276        | 455.261260     | 228.134268        | <b>5</b>  |
| 12 | 1208.542973        | 604.775124      | 1191.516424        | 596.261850       | 1190.532408        | 595.769842       | <b>G</b> | <b>376.219061</b>  | 188.613168        | 359.192512  | 180.099894        | 358.208496     | 179.607886        | <b>4</b>  |
| 13 | <b>1279.580087</b> | 640.293681      | 1262.553538        | 631.780407       | <b>1261.569522</b> | 631.288399       | <b>A</b> | 319.197597         | 160.102436        | 302.171048  | 151.589162        | 301.187032     | 151.097154        | <b>3</b>  |
| 14 | <b>1380.627766</b> | 690.817521      | <b>1363.601217</b> | 682.304246       | 1362.617201        | 681.812238       | <b>T</b> | <b>248.160483</b>  | 124.583879        | 231.133934  | 116.070605        | 230.149918     | 115.578597        | <b>2</b>  |
| 15 |                    |                 |                    |                  |                    |                  | <b>K</b> | 147.112804         | 74.060040         | 130.086255  | 65.546765         |                |                   | <b>1</b>  |

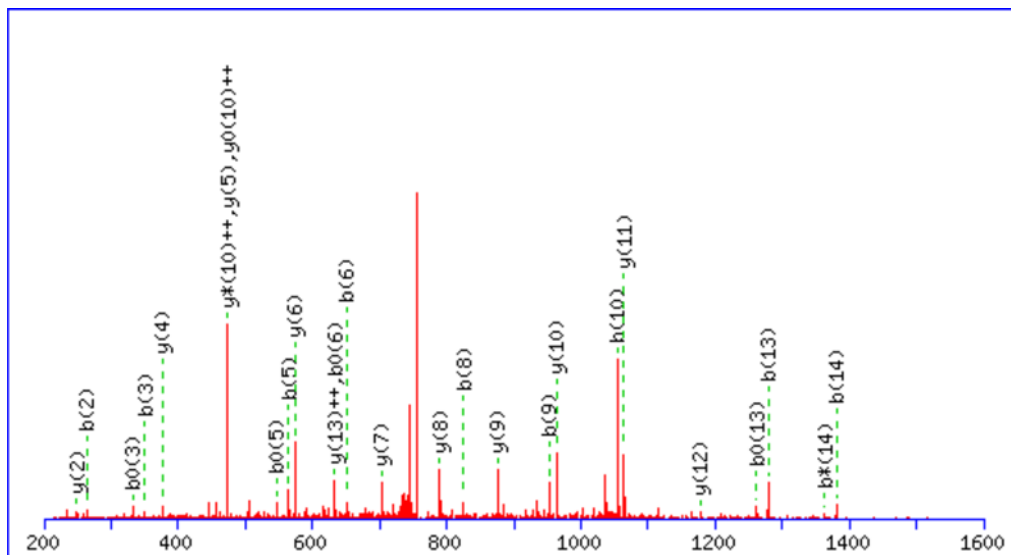

## Peptide View

MS/MS Fragmentation of **NIETIINTFHQYSVK**

Found in **IPI00027462**, Tax\_Id=9606 Gene\_Symbol=S100A9 Protein S100-A9

**Experiment:** 39 - OPC-3 **Fraction:** OPC-3

Match to Query 13866: 1805.932248 from(903.973400,2+)

Title: OECHL100317\_05.20313.20313.2.dta

Data file \\Boromir\masse\Data LTQ-Orbitrap\Chrystelle Lacroix\Etude clinique sJPU\OECHL100317\_05.raw

**Monoisotopic mass of neutral peptide Mr(calc):** 1805.931183 **Fixed modifications:** Carbamidomethyl (C) (apply to specified residues or termini only) **Ions Score:** 68

**Expect:** 2.1e-005 **Matches :** 15/160 fragment ions using 16 most intense peaks ([help](#))

| # | b          | b <sup>++</sup> | b <sup>*</sup> | b <sup>*++</sup> | b <sup>0</sup>    | b <sup>0++</sup>  | Seq. | y                  | y <sup>++</sup>   | y <sup>*</sup> | y <sup>*++</sup> | y <sup>0</sup> | y <sup>0++</sup> | #  |
|---|------------|-----------------|----------------|------------------|-------------------|-------------------|------|--------------------|-------------------|----------------|------------------|----------------|------------------|----|
| 1 | 115.050203 | 58.028740       | 98.023654      | 49.515465        |                   |                   | N    |                    |                   |                |                  |                |                  | 15 |
| 2 | 228.134267 | 114.570771      | 211.107718     | 106.057497       |                   |                   | I    | 1692.895549        | 846.951413        | 1675.869000    | 838.438138       | 1674.884984    | 837.946130       | 14 |
| 3 | 357.176860 | 179.092068      | 340.150311     | 170.578793       | 339.166295        | 170.086785        | E    | <b>1579.811485</b> | <b>790.409381</b> | 1562.784936    | 781.896106       | 1561.800920    | 781.404098       | 13 |
| 4 | 458.224539 | 229.615907      | 441.197990     | 221.102633       | <b>440.213974</b> | 220.610625        | T    | <b>1450.768892</b> | 725.888084        | 1433.742343    | 717.374810       | 1432.758327    | 716.882802       | 12 |
| 5 | 571.308603 | 286.157940      | 554.282054     | 277.644665       | <b>553.298038</b> | 277.152657        | I    | <b>1349.721213</b> | 675.364245        | 1332.694664    | 666.850970       | 1331.710648    | 666.358962       | 11 |
| 6 | 684.392667 | 342.699972      | 667.366118     | 334.186697       | 666.382102        | <b>333.694689</b> | I    | <b>1236.637149</b> | 618.822213        | 1219.610600    | 610.308938       | 1218.626584    | 609.816930       | 10 |

|    |                    |            |             |            |             |            |   |                    |            |             |            |             |                   |   |
|----|--------------------|------------|-------------|------------|-------------|------------|---|--------------------|------------|-------------|------------|-------------|-------------------|---|
| 7  | 798.435594         | 399.721435 | 781.409045  | 391.208161 | 780.425029  | 390.716153 | N | <b>1123.553085</b> | 562.280181 | 1106.526536 | 553.766906 | 1105.542520 | <b>553.274898</b> | 9 |
| 8  | 899.483273         | 450.245275 | 882.456724  | 441.732000 | 881.472708  | 441.239992 | T | <b>1009.510158</b> | 505.258717 | 992.483609  | 496.745443 | 991.499593  | 496.253435        | 8 |
| 9  | 1046.551687        | 523.779482 | 1029.525138 | 515.266207 | 1028.541122 | 514.774199 | F | 908.462479         | 454.734878 | 891.435930  | 446.221603 | 890.451914  | 445.729595        | 7 |
| 10 | 1183.610599        | 592.308938 | 1166.584050 | 583.795663 | 1165.600034 | 583.303655 | H | <b>761.394065</b>  | 381.200671 | 744.367516  | 372.687396 | 743.383500  | 372.195388        | 6 |
| 11 | 1311.669177        | 656.338227 | 1294.642628 | 647.824952 | 1293.658612 | 647.332944 | Q | <b>624.335153</b>  | 312.671215 | 607.308604  | 304.157940 | 606.324588  | 303.665932        | 5 |
| 12 | <b>1474.732506</b> | 737.869891 | 1457.705957 | 729.356617 | 1456.721941 | 728.864609 | Y | 496.276575         | 248.641926 | 479.250026  | 240.128651 | 478.266010  | 239.636643        | 4 |
| 13 | 1561.764534        | 781.385905 | 1544.737985 | 772.872631 | 1543.753969 | 772.380623 | S | <b>333.213246</b>  | 167.110261 | 316.186697  | 158.596987 | 315.202681  | 158.104979        | 3 |
| 14 | 1660.832948        | 830.920112 | 1643.806399 | 822.406838 | 1642.822383 | 821.914830 | V | 246.181218         | 123.594247 | 229.154669  | 115.080973 |             |                   | 2 |
| 15 |                    |            |             |            |             |            | K | 147.112804         | 74.060040  | 130.086255  | 65.546765  |             |                   | 1 |

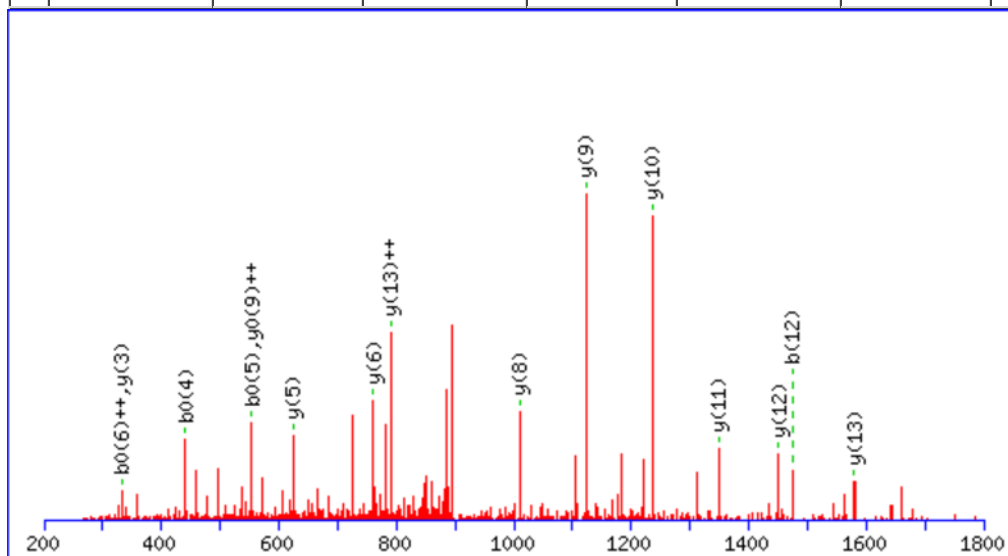

## Peptide View

MS/MS Fragmentation of **VYHVGLGDAAQPR**

Found in **IP100297252**, Tax\_Id=9606 Gene\_Symbol=SULF2 Isoform 1 of Extracellular sulfatase Sulf-2

**Experiment:** 39 - OPC-3 **Fraction:** OPC-3

Match to Query 9449: 1381.711272 from(461.577700,3+)

Title: OECHL100317\_05.9232.9232.3.dta

Data file \\Boromir\masse\Data LTQ-Orbitrap\Chrystelle Lacroix\Etude clinique sJPU\OECHL100317\_05.raw

**Monoisotopic mass of neutral peptide Mr(calc):** 1381.710251**Fixed modifications:** Carbamidomethyl (C) (apply to specified residues or termini only)**Ions Score:** 64  
**Expect:** 3.7e-005**Matches :** 21/100 fragment ions using 22 most intense peaks ([help](#))

| #  | b                  | b <sup>++</sup>   | b*          | b <sup>*++</sup> | b <sup>0</sup>     | b <sup>0++</sup> | Seq. | y                 | y <sup>++</sup>   | y*          | y <sup>*++</sup>  | y <sup>0</sup> | y <sup>0++</sup> | #  |
|----|--------------------|-------------------|-------------|------------------|--------------------|------------------|------|-------------------|-------------------|-------------|-------------------|----------------|------------------|----|
| 1  | 100.075690         | 50.541483         |             |                  |                    |                  | V    |                   |                   |             |                   |                |                  | 13 |
| 2  | 263.139019         | 132.073148        |             |                  |                    |                  | Y    | 1283.649112       | 642.328194        | 1266.622563 | 633.814920        | 1265.638547    | 633.322912       | 12 |
| 3  | <b>400.197931</b>  | <b>200.602603</b> |             |                  |                    |                  | H    | 1120.585783       | 560.796530        | 1103.559234 | 552.283255        | 1102.575218    | 551.791247       | 11 |
| 4  | 499.266345         | 250.136811        |             |                  |                    |                  | V    | <b>983.526871</b> | <b>492.267074</b> | 966.500322  | 483.753799        | 965.516306     | 483.261791       | 10 |
| 5  | <b>556.287809</b>  | 278.647543        |             |                  |                    |                  | G    | 884.458457        | 442.732867        | 867.431908  | 434.219592        | 866.447892     | 433.727584       | 9  |
| 6  | <b>669.371873</b>  | 335.189575        |             |                  |                    |                  | L    | 827.436993        | 414.222135        | 810.410444  | 405.708860        | 809.426428     | 405.216852       | 8  |
| 7  | <b>726.393337</b>  | 363.700307        |             |                  |                    |                  | G    | 714.352929        | 357.680103        | 697.326380  | 349.166828        | 696.342364     | 348.674820       | 7  |
| 8  | <b>841.420280</b>  | <b>421.213778</b> |             |                  | 823.409715         | 412.208496       | D    | 657.331465        | 329.169371        | 640.304916  | 320.656096        | 639.320900     | 320.164088       | 6  |
| 9  | <b>912.457394</b>  | 456.732335        |             |                  | 894.446829         | 447.727053       | A    | <b>542.304522</b> | 271.655899        | 525.277973  | 263.142625        |                |                  | 5  |
| 10 | <b>983.494508</b>  | <b>492.250892</b> |             |                  | 965.483943         | 483.245610       | A    | <b>471.267408</b> | 236.137342        | 454.240859  | 227.624068        |                |                  | 4  |
| 11 | <b>1111.553086</b> | <b>556.280181</b> | 1094.526537 | 547.766907       | <b>1093.542521</b> | 547.274899       | Q    | <b>400.230294</b> | <b>200.618785</b> | 383.203745  | <b>192.105511</b> |                |                  | 3  |
| 12 | 1208.605850        | 604.806563        | 1191.579301 | 596.293289       | 1190.595285        | 595.801281       | P    | <b>272.171716</b> | 136.589496        | 255.145167  | 128.076221        |                |                  | 2  |
| 13 |                    |                   |             |                  |                    |                  | R    | 175.118952        | 88.063114         | 158.092403  | 79.549839         |                |                  | 1  |

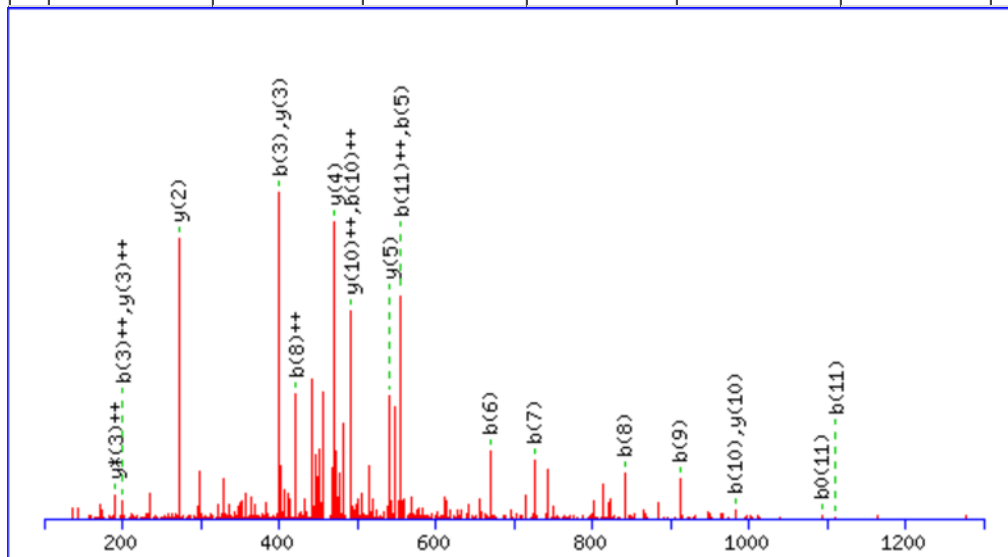

## Peptide View

MS/MS Fragmentation of **GTNYLADVFEKK**

Found in **IP100219806**, Tax\_Id=9606 Gene\_Symbol=S100A7 Protein S100-A7

**Experiment:** 39 - OPC-3 **Fraction:** OPC-3

Match to Query 9466: 1383.704848 from(692.859700,2+)

Title: OECHL100317\_05.16680.16680.2.dta

Data file \\Boromir\masse\Data LTQ-Orbitrap\Chrystelle Lacroix\Etude clinique sJPU\OECHL100317\_05.raw

**Monoisotopic mass of neutral peptide Mr(calc):** 1383.703415 **Fixed modifications:** Carbamidomethyl (C) (apply to specified residues or termini only) **Ions Score:** 56

**Expect:** 0.00028 **Matches :** 28/122 fragment ions using 46 most intense peaks ([help](#))

| #  | b                  | b <sup>++</sup>   | b*                 | b <sup>*++</sup> | b <sup>0</sup>     | b <sup>0++</sup>  | Seq.     | y                  | y <sup>++</sup>   | y*          | y <sup>*++</sup> | y <sup>0</sup>    | y <sup>0++</sup> | #  |
|----|--------------------|-------------------|--------------------|------------------|--------------------|-------------------|----------|--------------------|-------------------|-------------|------------------|-------------------|------------------|----|
| 1  | 58.028740          | 29.518008         |                    |                  |                    |                   | <b>G</b> |                    |                   |             |                  |                   |                  | 12 |
| 2  | 159.076419         | 80.041847         |                    |                  | 141.065854         | 71.036565         | <b>T</b> | 1327.689244        | 664.348260        | 1310.662695 | 655.834986       | 1309.678679       | 655.342977       | 11 |
| 3  | <b>273.119346</b>  | 137.063311        | 256.092797         | 128.550037       | <b>255.108781</b>  | 128.058029        | <b>N</b> | <b>1226.641565</b> | <b>613.824420</b> | 1209.615016 | 605.311146       | 1208.631000       | 604.819138       | 10 |
| 4  | <b>436.182675</b>  | 218.594976        | 419.156126         | 210.081701       | 418.172110         | 209.589693        | <b>Y</b> | <b>1112.598638</b> | <b>556.802957</b> | 1095.572089 | 548.289682       | 1094.588073       | 547.797674       | 9  |
| 5  | <b>549.266739</b>  | <b>275.137008</b> | 532.240190         | 266.623733       | 531.256174         | 266.131725        | <b>L</b> | <b>949.535309</b>  | <b>475.271292</b> | 932.508760  | 466.758018       | 931.524744        | 466.266010       | 8  |
| 6  | 620.303853         | 310.655565        | 603.277304         | 302.142290       | <b>602.293288</b>  | 301.650282        | <b>A</b> | <b>836.451245</b>  | 418.729260        | 819.424696  | 410.215986       | <b>818.440680</b> | 409.723978       | 7  |
| 7  | <b>735.330796</b>  | 368.169036        | 718.304247         | 359.655761       | 717.320231         | 359.163753        | <b>D</b> | <b>765.414131</b>  | 383.210703        | 748.387582  | 374.697429       | 747.403566        | 374.205421       | 6  |
| 8  | <b>834.399210</b>  | 417.703243        | 817.372661         | 409.189968       | 816.388645         | <b>408.697960</b> | <b>V</b> | <b>650.387188</b>  | 325.697232        | 633.360639  | 317.183957       | 632.376623        | 316.691949       | 5  |
| 9  | <b>981.467624</b>  | <b>491.237450</b> | 964.441075         | 482.724175       | 963.457059         | 482.232167        | <b>F</b> | <b>551.318774</b>  | 276.163025        | 534.292225  | 267.649750       | 533.308209        | 267.157742       | 4  |
| 10 | <b>1110.510217</b> | 555.758746        | <b>1093.483668</b> | 547.245472       | <b>1092.499652</b> | 546.753464        | <b>E</b> | 404.250360         | 202.628818        | 387.223811  | 194.115543       | <b>386.239795</b> | 193.623535       | 3  |
| 11 | <b>1238.605180</b> | 619.806228        | 1221.578631        | 611.292953       | 1220.594615        | 610.800945        | <b>K</b> | <b>275.207767</b>  | 138.107521        | 258.181218  | 129.594247       |                   |                  | 2  |
| 12 |                    |                   |                    |                  |                    |                   | <b>K</b> | 147.112804         | 74.060040         | 130.086255  | 65.546765        |                   |                  | 1  |

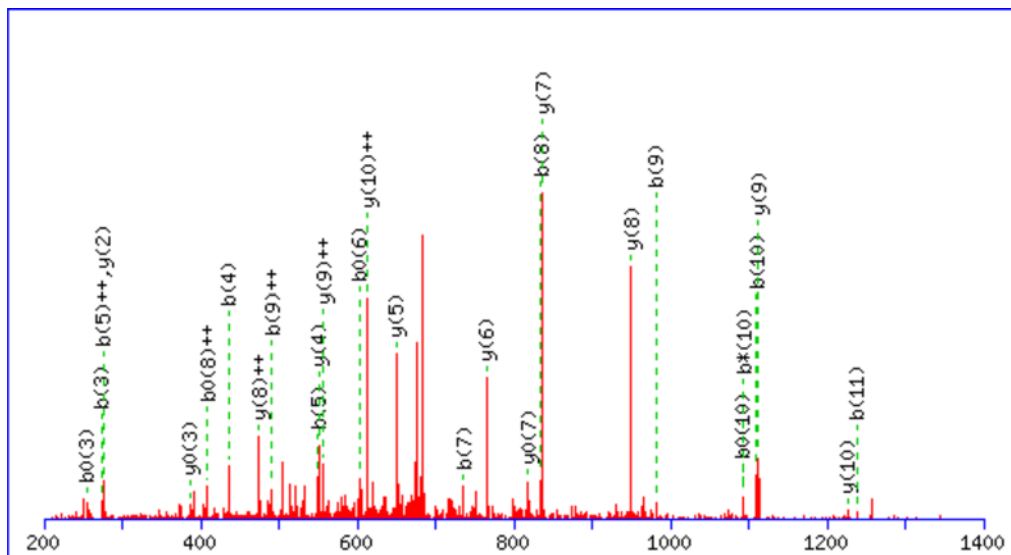

## Peptide View

MS/MS Fragmentation of **SCCSCCPVGCAK**

Found in **IPI00008752**, Tax\_Id=9606 Gene\_Symbol=MT1L;MT1G;MT1JP;MT1E Isoform 1 of Metallothionein-1G

**Experiment:** 39 - OPC-3 **Fraction:** OPC-3

Match to Query 10055: 1444.504448 from(723.259500,2+)

Title: OECHL100317\_05.3477.3477.2.dta

Data file \\Boromir\masse\Data LTQ-Orbitrap\Chrystelle Lacroix\Etude clinique sJPU\OECHL100317\_05.raw

**Monoisotopic mass of neutral peptide Mr(calc):** 1444.502609 **Fixed modifications:** Carbamidomethyl (C) (apply to specified residues or termini only) **Ions Score:** 56

**Expect:** 3.4e-006 **Matches :** 18/94 fragment ions using 25 most intense peaks ([help](#))

| # | b                 | b <sup>++</sup>   | b <sup>0</sup> | b <sup>0++</sup> | Seq. | y                  | y <sup>++</sup>   | y*          | y <sup>*++</sup>  | y <sup>0</sup> | y <sup>0++</sup>  | #  |
|---|-------------------|-------------------|----------------|------------------|------|--------------------|-------------------|-------------|-------------------|----------------|-------------------|----|
| 1 | 88.039304         | 44.523290         | 70.028739      | 35.518008        | S    |                    |                   |             |                   |                |                   | 12 |
| 2 | <b>248.069953</b> | 124.538614        | 230.059388     | 115.533332       | C    | 1358.477833        | 679.742555        | 1341.451284 | 671.229280        | 1340.467268    | 670.737272        | 11 |
| 3 | 408.100602        | 204.553939        | 390.090037     | 195.548657       | C    | <b>1198.447184</b> | <b>599.727230</b> | 1181.420635 | <b>591.213956</b> | 1180.436619    | <b>590.721948</b> | 10 |
| 4 | 495.132630        | <b>248.069953</b> | 477.122065     | 239.064671       | S    | <b>1038.416535</b> | 519.711906        | 1021.389986 | 511.198631        | 1020.405970    | 510.706623        | 9  |
| 5 | 655.163279        | 328.085278        | 637.152714     | 319.079995       | C    | <b>951.384507</b>  | 476.195892        | 934.357958  | 467.682617        |                |                   | 8  |
| 6 | <b>815.193928</b> | 408.100602        | 797.183363     | 399.095320       | C    | <b>791.353858</b>  | 396.180567        | 774.327309  | 387.667293        |                |                   | 7  |

|    |                    |            |             |            |   |                   |                   |            |            |  |  |  |   |
|----|--------------------|------------|-------------|------------|---|-------------------|-------------------|------------|------------|--|--|--|---|
| 7  | 912.246692         | 456.626984 | 894.236127  | 447.621702 | P | <b>631.323209</b> | 316.165243        | 614.296660 | 307.651968 |  |  |  | 6 |
| 8  | <b>1011.315106</b> | 506.161191 | 993.304541  | 497.155909 | V | 534.270445        | 267.638861        | 517.243896 | 259.125586 |  |  |  | 5 |
| 9  | 1068.336570        | 534.671923 | 1050.326005 | 525.666641 | G | <b>435.202031</b> | <b>218.104654</b> | 418.175482 | 209.591379 |  |  |  | 4 |
| 10 | <b>1228.367219</b> | 614.687248 | 1210.356654 | 605.681965 | C | <b>378.180567</b> | 189.593921        | 361.154018 | 181.080647 |  |  |  | 3 |
| 11 | <b>1299.404333</b> | 650.205805 | 1281.393768 | 641.200522 | A | <b>218.149918</b> | 109.578597        | 201.123369 | 101.065322 |  |  |  | 2 |
| 12 |                    |            |             |            | K | 147.112804        | 74.060040         | 130.086255 | 65.546765  |  |  |  | 1 |

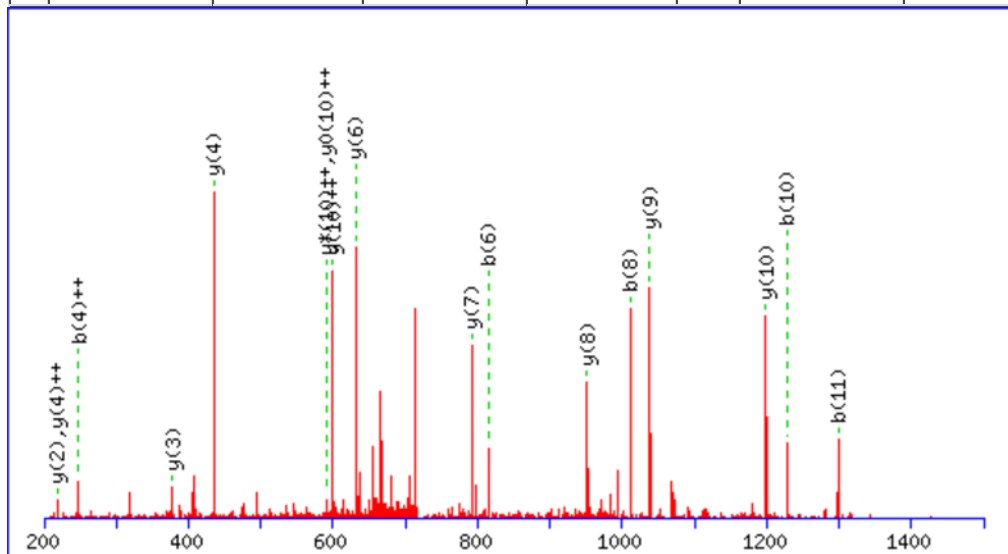

## Peptide View

MS/MS Fragmentation of **VTATGFQQCSLIDGR**

Found in **IPI00333140**, Tax\_Id=9606 Gene\_Symbol=DNER Delta and Notch-like epidermal growth factor-related receptor

**Experiment:** 21 - NOPB3 **Fraction:** NOPB3

Match to Query 10898: 1651.799248 from(826.906900,2+)

Title: OECHL100317\_03.13303.13303.2.dta

Data file \\Boromir\masse\Data LTQ-Orbitrap\Chrystelle Lacroix\Etude clinique sJPU\OECHL100317\_03.raw

**Monoisotopic mass of neutral peptide Mr(calc):** 1651.798828 **Fixed modifications:** Carbamidomethyl (C) (apply to specified residues or termini only) **Ions Score:** 107

**Expect:** 3e-009 **Matches :** 46/150 fragment ions using 67 most intense peaks ([help](#))

| # | b | b <sup>++</sup> | b <sup>*</sup> | b <sup>*++</sup> | b <sup>0</sup> | b <sup>0++</sup> | Seq. | y | y <sup>++</sup> | y <sup>*</sup> | y <sup>*++</sup> | y <sup>0</sup> | y <sup>0++</sup> | # |
|---|---|-----------------|----------------|------------------|----------------|------------------|------|---|-----------------|----------------|------------------|----------------|------------------|---|
|---|---|-----------------|----------------|------------------|----------------|------------------|------|---|-----------------|----------------|------------------|----------------|------------------|---|

|    |             |            |             |            |             |            |   |             |            |             |            |             |            |    |
|----|-------------|------------|-------------|------------|-------------|------------|---|-------------|------------|-------------|------------|-------------|------------|----|
| 1  | 100.075690  | 50.541483  |             |            |             |            | V |             |            |             |            |             |            | 15 |
| 2  | 201.123369  | 101.065322 |             |            | 183.112804  | 92.060040  | T | 1553.737670 | 777.372473 | 1536.711121 | 768.859198 | 1535.727105 | 768.367190 | 14 |
| 3  | 272.160483  | 136.583879 |             |            | 254.149918  | 127.578597 | A | 1452.689991 | 726.848633 | 1435.663442 | 718.335359 | 1434.679426 | 717.843351 | 13 |
| 4  | 373.208162  | 187.107719 |             |            | 355.197597  | 178.102437 | T | 1381.652877 | 691.330076 | 1364.626328 | 682.816802 | 1363.642312 | 682.324794 | 12 |
| 5  | 430.229626  | 215.618451 |             |            | 412.219061  | 206.613169 | G | 1280.605198 | 640.806237 | 1263.578649 | 632.292962 | 1262.594633 | 631.800954 | 11 |
| 6  | 577.298040  | 289.152658 |             |            | 559.287475  | 280.147376 | F | 1223.583734 | 612.295505 | 1206.557185 | 603.782230 | 1205.573169 | 603.290222 | 10 |
| 7  | 705.356618  | 353.181947 | 688.330069  | 344.668673 | 687.346053  | 344.176665 | Q | 1076.515320 | 538.761298 | 1059.488771 | 530.248023 | 1058.504755 | 529.756015 | 9  |
| 8  | 833.415196  | 417.211236 | 816.388647  | 408.697962 | 815.404631  | 408.205954 | Q | 948.456742  | 474.732009 | 931.430193  | 466.218734 | 930.446177  | 465.726726 | 8  |
| 9  | 993.445845  | 497.226561 | 976.419296  | 488.713286 | 975.435280  | 488.221278 | C | 820.398164  | 410.702720 | 803.371615  | 402.189445 | 802.387599  | 401.697437 | 7  |
| 10 | 1080.477873 | 540.742575 | 1063.451324 | 532.229300 | 1062.467308 | 531.737292 | S | 660.367515  | 330.687395 | 643.340966  | 322.174121 | 642.356950  | 321.682113 | 6  |
| 11 | 1193.561937 | 597.284607 | 1176.535388 | 588.771332 | 1175.551372 | 588.279324 | L | 573.335487  | 287.171381 | 556.308938  | 278.658107 | 555.324922  | 278.166099 | 5  |
| 12 | 1306.646001 | 653.826638 | 1289.619452 | 645.313364 | 1288.635436 | 644.821356 | I | 460.251423  | 230.629349 | 443.224874  | 222.116075 | 442.240858  | 221.624067 | 4  |
| 13 | 1421.672944 | 711.340110 | 1404.646395 | 702.826836 | 1403.662379 | 702.334827 | D | 347.167359  | 174.087317 | 330.140810  | 165.574043 | 329.156794  | 165.082035 | 3  |
| 14 | 1478.694408 | 739.850842 | 1461.667859 | 731.337567 | 1460.683843 | 730.845559 | G | 232.140416  | 116.573846 | 215.113867  | 108.060571 |             |            | 2  |
| 15 |             |            |             |            |             |            | R | 175.118952  | 88.063114  | 158.092403  | 79.549839  |             |            | 1  |

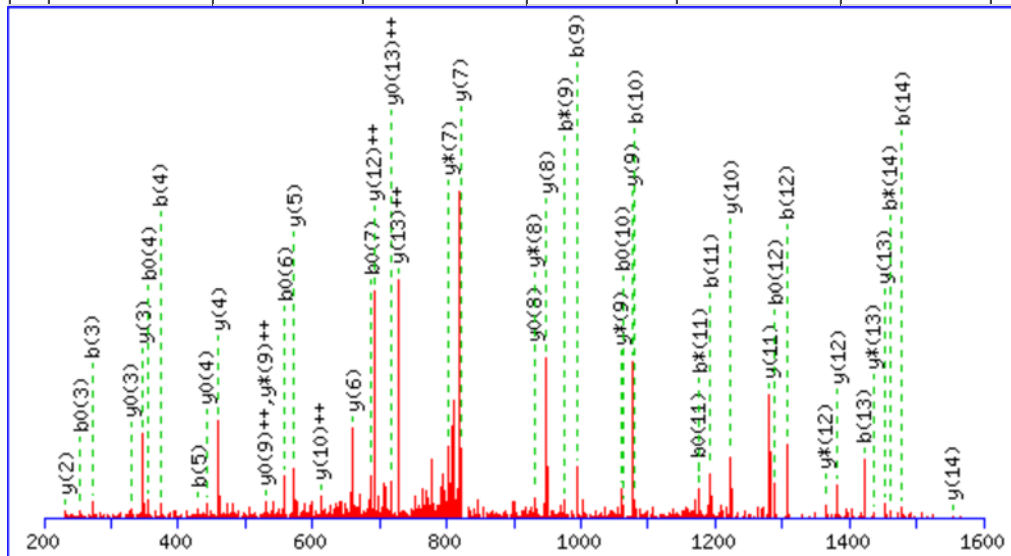

## Peptide View



MS/MS Fragmentation of **DFSLTSSSQTPGATK**Found in **IPI00291300**, Tax\_Id=9606 Gene\_Symbol=PODXL2 Putative uncharacterized protein PODXL2**Experiment:** 21 - NOPB3 **Fraction:** NOPB3

Match to Query 9813: 1525.725648 from(763.870100,2+)

Title: OECHL100317\_03.10767.10767.2.dta

Data file \\Boromir\masse\Data LTQ-Orbitrap\Chrystelle Lacroix\Etude clinique sJPU\OECHL100317\_03.raw

**Monoisotopic mass of neutral peptide Mr(calc):** 1525.726028**Fixed modifications:** Carbamidomethyl (C) (apply to specified residues or termini only)**Ions Score:** 88**Expect:** 1.8e-007**Matches :** 22/150 fragment ions using 26 most intense peaks ([help](#))

| #  | b                  | b <sup>++</sup> | b <sup>*</sup> | b <sup>*++</sup> | b <sup>0</sup>    | b <sup>0++</sup> | Seq.     | y                  | y <sup>++</sup> | y <sup>*</sup> | y <sup>*++</sup>  | y <sup>0</sup> | y <sup>0++</sup>  | #         |
|----|--------------------|-----------------|----------------|------------------|-------------------|------------------|----------|--------------------|-----------------|----------------|-------------------|----------------|-------------------|-----------|
| 1  | 116.034219         | 58.520748       |                |                  | 98.023654         | 49.515465        | <b>D</b> |                    |                 |                |                   |                |                   | <b>15</b> |
| 2  | <b>263.102633</b>  | 132.054954      |                |                  | 245.092068        | 123.049672       | <b>F</b> | 1411.706351        | 706.356813      | 1394.679802    | 697.843539        | 1393.695786    | 697.351531        | <b>14</b> |
| 3  | <b>350.134661</b>  | 175.570968      |                |                  | <b>332.124096</b> | 166.565686       | <b>S</b> | 1264.637937        | 632.822607      | 1247.611388    | <b>624.309332</b> | 1246.627372    | <b>623.817324</b> | <b>13</b> |
| 4  | 463.218725         | 232.113001      |                |                  | 445.208160        | 223.107718       | <b>L</b> | <b>1177.605909</b> | 589.306592      | 1160.579360    | 580.793318        | 1159.595344    | 580.301310        | <b>12</b> |
| 5  | <b>564.266404</b>  | 282.636840      |                |                  | 546.255839        | 273.631558       | <b>T</b> | <b>1064.521845</b> | 532.764561      | 1047.495296    | 524.251286        | 1046.511280    | 523.759278        | <b>11</b> |
| 6  | 651.298432         | 326.152854      |                |                  | 633.287867        | 317.147572       | <b>S</b> | <b>963.474166</b>  | 482.240721      | 946.447617     | <b>473.727446</b> | 945.463601     | <b>473.235438</b> | <b>10</b> |
| 7  | 738.330460         | 369.668868      |                |                  | 720.319895        | 360.663586       | <b>S</b> | <b>876.442138</b>  | 438.724707      | 859.415589     | 430.211432        | 858.431573     | 429.719424        | <b>9</b>  |
| 8  | <b>825.362488</b>  | 413.184882      |                |                  | 807.351923        | 404.179599       | <b>S</b> | 789.410110         | 395.208693      | 772.383561     | 386.695418        | 771.399545     | 386.203410        | <b>8</b>  |
| 9  | <b>953.421066</b>  | 477.214171      | 936.394517     | 468.700897       | 935.410501        | 468.208889       | <b>Q</b> | <b>702.378082</b>  | 351.692679      | 685.351533     | 343.179404        | 684.367517     | 342.687396        | <b>7</b>  |
| 10 | <b>1054.468745</b> | 527.738010      | 1037.442196    | 519.224736       | 1036.458180       | 518.732728       | <b>T</b> | <b>574.319504</b>  | 287.663390      | 557.292955     | 279.150115        | 556.308939     | 278.658107        | <b>6</b>  |
| 11 | 1151.521509        | 576.264392      | 1134.494960    | 567.751118       | 1133.510944       | 567.259110       | <b>P</b> | <b>473.271825</b>  | 237.139550      | 456.245276     | 228.626276        | 455.261260     | 228.134268        | <b>5</b>  |
| 12 | <b>1208.542973</b> | 604.775124      | 1191.516424    | 596.261850       | 1190.532408       | 595.769842       | <b>G</b> | 376.219061         | 188.613168      | 359.192512     | 180.099894        | 358.208496     | 179.607886        | <b>4</b>  |
| 13 | <b>1279.580087</b> | 640.293681      | 1262.553538    | 631.780407       | 1261.569522       | 631.288399       | <b>A</b> | 319.197597         | 160.102436      | 302.171048     | 151.589162        | 301.187032     | 151.097154        | <b>3</b>  |
| 14 | <b>1380.627766</b> | 690.817521      | 1363.601217    | 682.304246       | 1362.617201       | 681.812238       | <b>T</b> | <b>248.160483</b>  | 124.583879      | 231.133934     | 116.070605        | 230.149918     | 115.578597        | <b>2</b>  |
| 15 |                    |                 |                |                  |                   |                  | <b>K</b> | 147.112804         | 74.060040       | 130.086255     | 65.546765         |                |                   | <b>1</b>  |

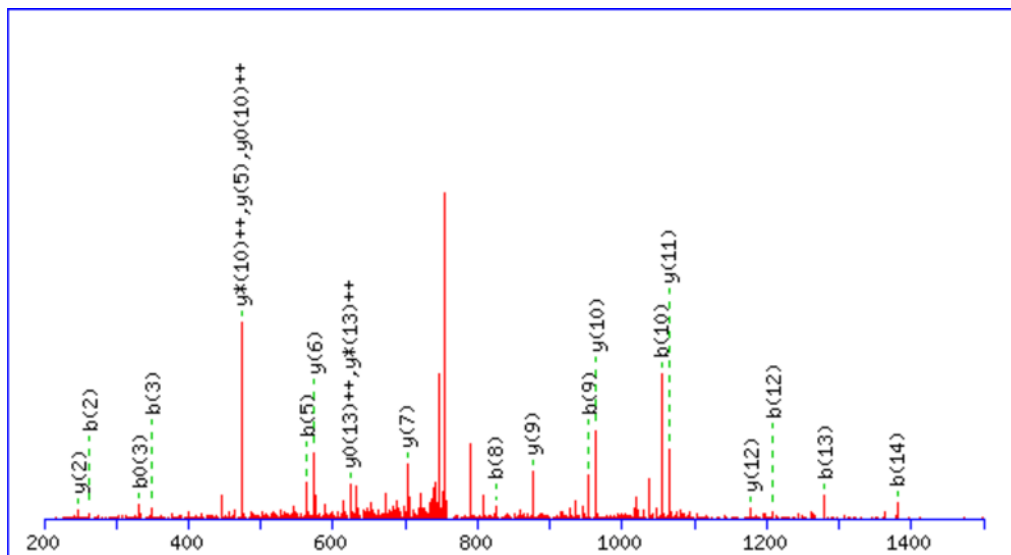

## Peptide View

MS/MS Fragmentation of **ASVGQDSPEPR**

Found in **IPI00044369**, Tax\_Id=9606 Gene\_Symbol=PLXDC2 Isoform 1 of Plexin domain-containing protein 2

**Experiment:** 21 - NOPB3 **Fraction:** NOPB3

Match to Query 5159: 1141.536248 from(571.775400,2+)

Title: OECHL100317\_03.3279.3279.2.dta

Data file \\Boromir\masse\Data LTQ-Orbitrap\Chrystelle Lacroix\Etude clinique sJPU\OECHL100317\_03.raw

**Monoisotopic mass of neutral peptide Mr(calc):** 1141.536362 **Fixed modifications:** Carbamidomethyl (C) (apply to specified residues or termini only) **Ions Score:** 76

**Expect:** 1.5e-006 **Matches :** 18/106 fragment ions using 20 most intense peaks ([help](#))

| # | b                 | b <sup>++</sup> | b*         | b* <sup>++</sup> | b <sup>0</sup>    | b <sup>0++</sup> | Seq. | y                  | y <sup>++</sup>   | y*          | y* <sup>++</sup> | y <sup>0</sup> | y <sup>0++</sup> | #  |
|---|-------------------|-----------------|------------|------------------|-------------------|------------------|------|--------------------|-------------------|-------------|------------------|----------------|------------------|----|
| 1 | 72.044390         | 36.525833       |            |                  |                   |                  | A    |                    |                   |             |                  |                |                  | 11 |
| 2 | 159.076418        | 80.041847       |            |                  | 141.065853        | 71.036564        | S    | <b>1071.506528</b> | 536.256902        | 1054.479979 | 527.743628       | 1053.495963    | 527.251620       | 10 |
| 3 | 258.144832        | 129.576054      |            |                  | <b>240.134267</b> | 120.570772       | V    | <b>984.474500</b>  | <b>492.740888</b> | 967.447951  | 484.227614       | 966.463935     | 483.735606       | 9  |
| 4 | <b>315.166296</b> | 158.086786      |            |                  | 297.155731        | 149.081504       | G    | <b>885.406086</b>  | <b>443.206681</b> | 868.379537  | 434.693407       | 867.395521     | 434.201399       | 8  |
| 5 | <b>443.224874</b> | 222.116075      | 426.198325 | 213.602801       | <b>425.214309</b> | 213.110793       | Q    | <b>828.384622</b>  | 414.695949        | 811.358073  | 406.182675       | 810.374057     | 405.690667       | 7  |
| 6 | 558.251817        | 279.629547      | 541.225268 | 271.116272       | 540.241252        | 270.624264       | D    | <b>700.326044</b>  | 350.666660        | 683.299495  | 342.153386       | 682.315479     | 341.661378       | 6  |

|    |            |            |            |            |            |            |   |            |            |            |            |            |            |   |
|----|------------|------------|------------|------------|------------|------------|---|------------|------------|------------|------------|------------|------------|---|
| 7  | 645.283845 | 323.145561 | 628.257296 | 314.632286 | 627.273280 | 314.140278 | S | 585.299101 | 293.153189 | 568.272552 | 284.639914 | 567.288536 | 284.147906 | 5 |
| 8  | 742.336609 | 371.671943 | 725.310060 | 363.158668 | 724.326044 | 362.666660 | P | 498.267073 | 249.637174 | 481.240524 | 241.123900 | 480.256508 | 240.631892 | 4 |
| 9  | 871.379202 | 436.193239 | 854.352653 | 427.679965 | 853.368637 | 427.187957 | E | 401.214309 | 201.110792 | 384.187760 | 192.597518 | 383.203744 | 192.105510 | 3 |
| 10 | 968.431966 | 484.719621 | 951.405417 | 476.206347 | 950.421401 | 475.714339 | P | 272.171716 | 136.589496 | 255.145167 | 128.076221 |            |            | 2 |
| 11 |            |            |            |            |            |            | R | 175.118952 | 88.063114  | 158.092403 | 79.549839  |            |            | 1 |

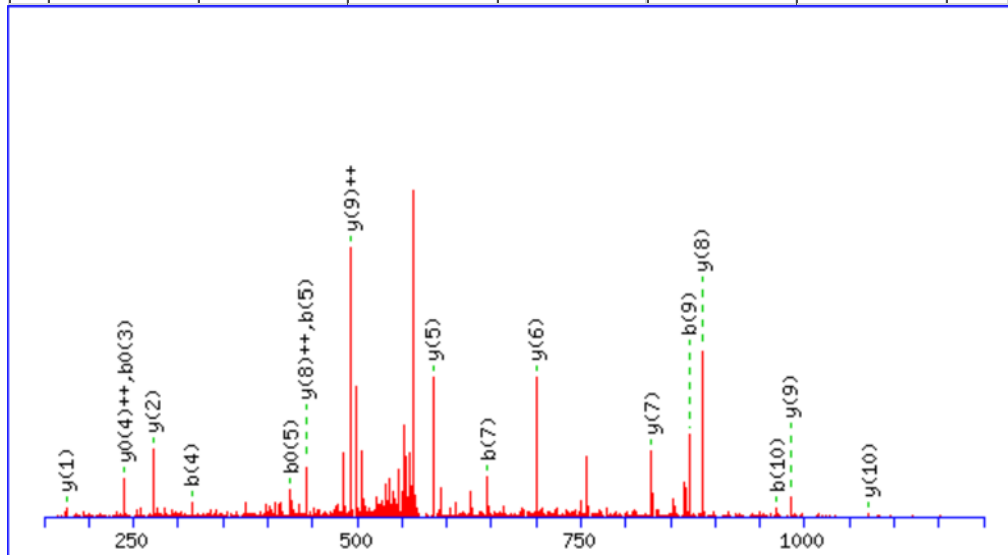

## Peptide View

MS/MS Fragmentation of **GLDTSLGAVQSDTGR**

Found in **IPI00289931**, Tax\_Id=9606 Gene\_Symbol=MADCAM1 MADCAM1 protein

Experiment: 21 - NOPB3 Fraction: NOPB3

Match to Query 9345: 1475.722448 from(738.868500,2+)

Title: OECHL100317\_03.11053.11053.2.dta

Data file \\Boromir\masse\Data LTQ-Orbitrap\Chrystelle Lacroix\Etude clinique sJPU\OECHL100317\_03.raw

**Monoisotopic mass of neutral peptide Mr(calc):** 1475.721619 **Fixed modifications:** Carbamidomethyl (C) (apply to specified residues or termini only) **Ions Score:** 95

**Expect:** 4.9e-008 **Matches :** 35/142 fragment ions using 49 most intense peaks ([help](#))

| # | b         | b <sup>++</sup> | b* | b <sup>*++</sup> | b <sup>0</sup> | b <sup>0++</sup> | Seq. | y | y <sup>++</sup> | y* | y <sup>*++</sup> | y <sup>0</sup> | y <sup>0++</sup> | #  |
|---|-----------|-----------------|----|------------------|----------------|------------------|------|---|-----------------|----|------------------|----------------|------------------|----|
| 1 | 58.028740 | 29.518008       |    |                  |                |                  | G    |   |                 |    |                  |                |                  | 15 |

|    |                    |            |                    |            |                    |                   |   |                    |                   |             |                   |             |                   |    |
|----|--------------------|------------|--------------------|------------|--------------------|-------------------|---|--------------------|-------------------|-------------|-------------------|-------------|-------------------|----|
| 2  | 171.112804         | 86.060040  |                    |            |                    |                   | L | 1419.707414        | 710.357345        | 1402.680865 | 701.844071        | 1401.696849 | 701.352063        | 14 |
| 3  | <b>286.139747</b>  | 143.573512 |                    |            | 268.129182         | 134.568229        | D | <b>1306.623350</b> | 653.815313        | 1289.596801 | 645.302039        | 1288.612785 | <b>644.810031</b> | 13 |
| 4  | <b>387.187426</b>  | 194.097351 |                    |            | <b>369.176861</b>  | 185.092069        | T | <b>1191.596407</b> | <b>596.301842</b> | 1174.569858 | <b>587.788567</b> | 1173.585842 | <b>587.296559</b> | 12 |
| 5  | <b>474.219454</b>  | 237.613365 |                    |            | <b>456.208889</b>  | 228.608082        | S | <b>1090.548728</b> | 545.778002        | 1073.522179 | 537.264728        | 1072.538163 | 536.772719        | 11 |
| 6  | <b>587.303518</b>  | 294.155397 |                    |            | <b>569.292953</b>  | <b>285.150115</b> | L | <b>1003.516700</b> | 502.261988        | 986.490151  | 493.748714        | 985.506135  | 493.256706        | 10 |
| 7  | <b>644.324982</b>  | 322.666129 |                    |            | 626.314417         | 313.660847        | G | <b>890.432636</b>  | 445.719956        | 873.406087  | 437.206682        | 872.422071  | 436.714674        | 9  |
| 8  | <b>715.362096</b>  | 358.184686 |                    |            | <b>697.351531</b>  | 349.179404        | A | <b>833.411172</b>  | 417.209224        | 816.384623  | 408.695950        | 815.400607  | 408.203942        | 8  |
| 9  | <b>814.430510</b>  | 407.718893 |                    |            | 796.419945         | 398.713611        | V | <b>762.374058</b>  | 381.690667        | 745.347509  | 373.177393        | 744.363493  | 372.685385        | 7  |
| 10 | <b>942.489088</b>  | 471.748182 | 925.462539         | 463.234908 | <b>924.478523</b>  | 462.742900        | Q | <b>663.305644</b>  | 332.156460        | 646.279095  | 323.643186        | 645.295079  | 323.151178        | 6  |
| 11 | <b>1029.521116</b> | 515.264196 | 1012.494567        | 506.750922 | 1011.510551        | 506.258914        | S | <b>535.247066</b>  | 268.127171        | 518.220517  | 259.613897        | 517.236501  | 259.121889        | 5  |
| 12 | <b>1144.548059</b> | 572.777668 | 1127.521510        | 564.264393 | <b>1126.537494</b> | 563.772385        | D | <b>448.215038</b>  | 224.611157        | 431.188489  | 216.097882        | 430.204473  | 215.605874        | 4  |
| 13 | <b>1245.595738</b> | 623.301507 | <b>1228.569189</b> | 614.788233 | 1227.585173        | 614.296225        | T | <b>333.188095</b>  | 167.097685        | 316.161546  | 158.584411        | 315.177530  | 158.092403        | 3  |
| 14 | 1302.617202        | 651.812239 | 1285.590653        | 643.298965 | 1284.606637        | 642.806957        | G | <b>232.140416</b>  | 116.573846        | 215.113867  | 108.060571        |             |                   | 2  |
| 15 |                    |            |                    |            |                    |                   | R | 175.118952         | 88.063114         | 158.092403  | 79.549839         |             |                   | 1  |

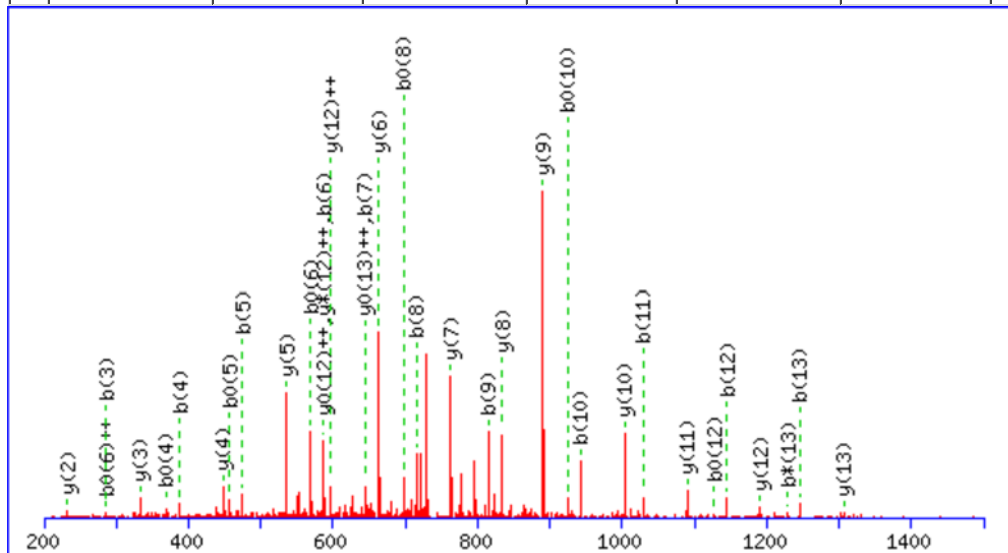

## Peptide View

MS/MS Fragmentation of **TELLNVCMNAK**Found in **IPI00441498**, Tax\_Id=9606 Gene\_Symbol=FOLR1 Folate receptor alpha**Experiment:** 21 - NOPB3 **Fraction:** NOPB3

Match to Query 7592: 1291.626448 from(646.820500,2+)

Title: OECHL100317\_03.13353.13353.2.dta

Data file \\Boromir\masse\Data LTQ-Orbitrap\Chrystelle Lacroix\Etude clinique sJPU\OECHL100317\_03.raw

**Monoisotopic mass of neutral peptide Mr(calc):** 1291.626419 **Fixed modifications:** Carbamidomethyl (C) (apply to specified residues or termini only) **Ions Score:** 60**Expect:** 8.4e-005 **Matches :** 25/94 fragment ions using 44 most intense peaks ([help](#))

| #  | b                  | b <sup>++</sup> | b*                 | b <sup>*++</sup> | b <sup>0</sup>    | b <sup>0++</sup> | Seq. | y                  | y <sup>++</sup>   | y*          | y <sup>*++</sup> | y <sup>0</sup> | y <sup>0++</sup> | #  |
|----|--------------------|-----------------|--------------------|------------------|-------------------|------------------|------|--------------------|-------------------|-------------|------------------|----------------|------------------|----|
| 1  | 102.054955         | 51.531116       |                    |                  | 84.044390         | 42.525833        | T    |                    |                   |             |                  |                |                  | 11 |
| 2  | <b>231.097548</b>  | 116.052412      |                    |                  | 213.086983        | 107.047130       | E    | 1191.586041        | 596.296659        | 1174.559492 | 587.783384       | 1173.575476    | 587.291376       | 10 |
| 3  | <b>344.181612</b>  | 172.594444      |                    |                  | 326.171047        | 163.589162       | L    | <b>1062.543448</b> | <b>531.775362</b> | 1045.516899 | 523.262088       |                |                  | 9  |
| 4  | <b>457.265676</b>  | 229.136476      |                    |                  | <b>439.255111</b> | 220.131194       | L    | <b>949.459384</b>  | 475.233330        | 932.432835  | 466.720056       |                |                  | 8  |
| 5  | <b>571.308603</b>  | 286.157940      | <b>554.282054</b>  | 277.644665       | <b>553.298038</b> | 277.152657       | N    | <b>836.375320</b>  | 418.691298        | 819.348771  | 410.178023       |                |                  | 7  |
| 6  | <b>670.377017</b>  | 335.692147      | 653.350468         | 327.178872       | 652.366452        | 326.686864       | V    | <b>722.332393</b>  | 361.669835        | 705.305844  | 353.156560       |                |                  | 6  |
| 7  | <b>830.407666</b>  | 415.707471      | <b>813.381117</b>  | 407.194197       | 812.397101        | 406.702189       | C    | <b>623.263979</b>  | 312.135628        | 606.237430  | 303.622353       |                |                  | 5  |
| 8  | <b>961.448151</b>  | 481.227714      | <b>944.421602</b>  | 472.714439       | 943.437586        | 472.222431       | M    | <b>463.233330</b>  | <b>232.120303</b> | 446.206781  | 223.607028       |                |                  | 4  |
| 9  | <b>1075.491078</b> | 538.249177      | <b>1058.464529</b> | 529.735903       | 1057.480513       | 529.243895       | N    | <b>332.192845</b>  | 166.600060        | 315.166296  | 158.086786       |                |                  | 3  |
| 10 | <b>1146.528192</b> | 573.767734      | 1129.501643        | 565.254460       | 1128.517627       | 564.762452       | A    | <b>218.149918</b>  | 109.578597        | 201.123369  | 101.065322       |                |                  | 2  |
| 11 |                    |                 |                    |                  |                   |                  | K    | 147.112804         | 74.060040         | 130.086255  | 65.546765        |                |                  | 1  |

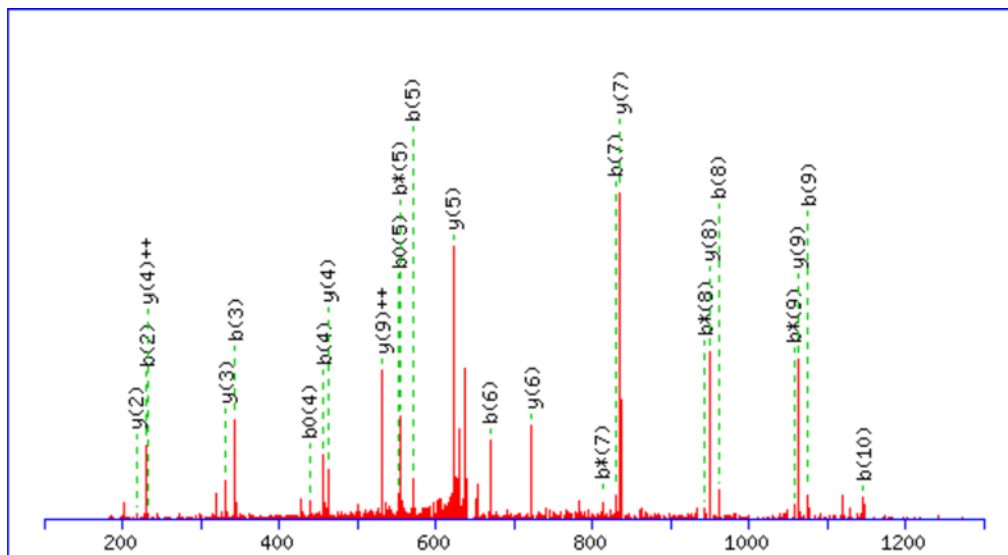

## Peptide View

MS/MS Fragmentation of **YSGSEGSTQTLTKGELK**

Found in **IP100017526**, Tax\_Id=9606 Gene\_Symbol=S100P Protein S100-P

**Experiment:** 21 - NOPB3 **Fraction:** NOPB3

Match to Query 11849: 1784.880048 from(893.447300,2+)

Title: OECHL100317\_03.7643.7643.2.dta

Data file \\Boromir\masse\Data LTQ-Orbitrap\Chrystelle Lacroix\Etude clinique sJPU\OECHL100317\_03.raw

**Monoisotopic mass of neutral peptide Mr(calc):** 1784.879211 **Fixed modifications:** Carbamidomethyl (C) (apply to specified residues or termini only) **Ions Score:** 77

**Expect:** 2.8e-006 **Matches :** 38/170 fragment ions using 74 most intense peaks ([help](#))

| # | b          | b <sup>++</sup> | b* | b <sup>*++</sup> | b <sup>0</sup>    | b <sup>0++</sup> | Seq.     | y                  | y <sup>++</sup>   | y*          | y <sup>*++</sup> | y <sup>0</sup>     | y <sup>0++</sup> | #  |
|---|------------|-----------------|----|------------------|-------------------|------------------|----------|--------------------|-------------------|-------------|------------------|--------------------|------------------|----|
| 1 | 164.070605 | 82.538940       |    |                  |                   |                  | <b>Y</b> |                    |                   |             |                  |                    |                  | 17 |
| 2 | 251.102633 | 126.054954      |    |                  | 233.092068        | 117.049672       | <b>S</b> | <b>1622.823172</b> | <b>811.915224</b> | 1605.796623 | 803.401950       | 1604.812607        | 802.909941       | 16 |
| 3 | 308.124097 | 154.565687      |    |                  | <b>290.113532</b> | 145.560404       | <b>G</b> | <b>1535.791144</b> | <b>768.399210</b> | 1518.764595 | 759.885936       | 1517.780579        | 759.393928       | 15 |
| 4 | 395.156125 | 198.081701      |    |                  | 377.145560        | 189.076418       | <b>S</b> | 1478.769680        | <b>739.888478</b> | 1461.743131 | 731.375204       | 1460.759115        | 730.883195       | 14 |
| 5 | 524.198718 | 262.602997      |    |                  | <b>506.188153</b> | 253.597715       | <b>E</b> | <b>1391.737652</b> | <b>696.372464</b> | 1374.711103 | 687.859190       | <b>1373.727087</b> | 687.367182       | 13 |
| 6 | 581.220182 | 291.113729      |    |                  | <b>563.209617</b> | 282.108447       | <b>G</b> | <b>1262.695059</b> | <b>631.851167</b> | 1245.668510 | 623.337893       | <b>1244.684494</b> | 622.845885       | 12 |

|    |             |            |             |            |             |            |   |             |            |             |            |             |            |    |
|----|-------------|------------|-------------|------------|-------------|------------|---|-------------|------------|-------------|------------|-------------|------------|----|
| 7  | 668.252210  | 334.629743 |             |            | 650.241645  | 325.624461 | S | 1205.673595 | 603.340436 | 1188.647046 | 594.827161 | 1187.663030 | 594.335153 | 11 |
| 8  | 769.299889  | 385.153583 |             |            | 751.289324  | 376.148300 | T | 1118.641567 | 559.824421 | 1101.615018 | 551.311147 | 1100.631002 | 550.819139 | 10 |
| 9  | 897.358467  | 449.182872 | 880.331918  | 440.669597 | 879.347902  | 440.177589 | Q | 1017.593888 | 509.300582 | 1000.567339 | 500.787307 | 999.583323  | 500.295299 | 9  |
| 10 | 998.406146  | 499.706711 | 981.379597  | 491.193437 | 980.395581  | 490.701429 | T | 889.535310  | 445.271293 | 872.508761  | 436.758018 | 871.524745  | 436.266010 | 8  |
| 11 | 1111.490210 | 556.248743 | 1094.463661 | 547.735469 | 1093.479645 | 547.243461 | L | 788.487631  | 394.747453 | 771.461082  | 386.234179 | 770.477066  | 385.742171 | 7  |
| 12 | 1212.537889 | 606.772583 | 1195.511340 | 598.259308 | 1194.527324 | 597.767300 | T | 675.403567  | 338.205421 | 658.377018  | 329.692147 | 657.393002  | 329.200139 | 6  |
| 13 | 1340.632852 | 670.820064 | 1323.606303 | 662.306790 | 1322.622287 | 661.814782 | K | 574.355888  | 287.681582 | 557.329339  | 279.168307 | 556.345323  | 278.676299 | 5  |
| 14 | 1397.654316 | 699.330796 | 1380.627767 | 690.817522 | 1379.643751 | 690.325514 | G | 446.260925  | 223.634100 | 429.234376  | 215.120826 | 428.250360  | 214.628818 | 4  |
| 15 | 1526.696909 | 763.852093 | 1509.670360 | 755.338818 | 1508.686344 | 754.846810 | E | 389.239461  | 195.123368 | 372.212912  | 186.610094 | 371.228896  | 186.118086 | 3  |
| 16 | 1639.780973 | 820.394124 | 1622.754424 | 811.880850 | 1621.770408 | 811.388842 | L | 260.196868  | 130.602072 | 243.170319  | 122.088797 |             |            | 2  |
| 17 |             |            |             |            |             |            | K | 147.112804  | 74.060040  | 130.086255  | 65.546765  |             |            | 1  |

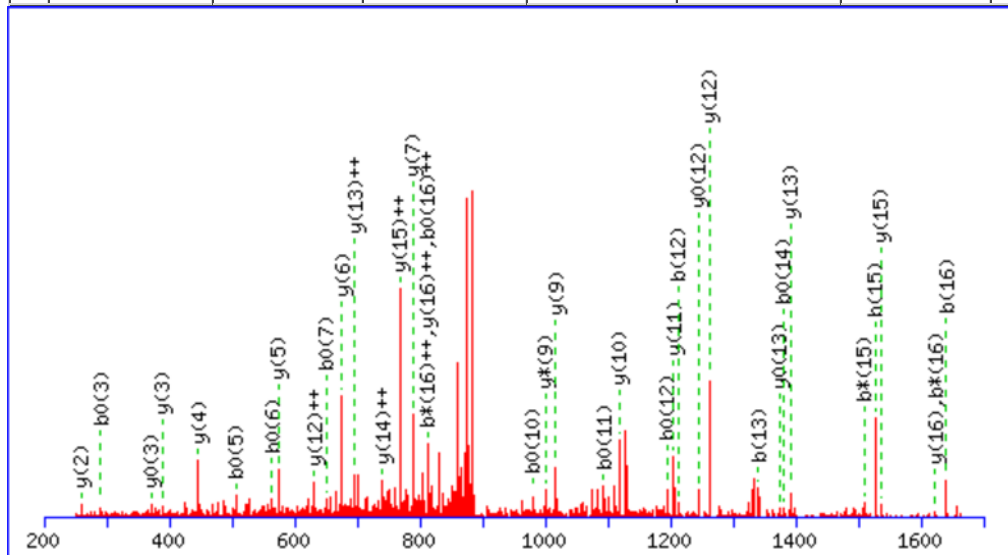

## Peptide View

MS/MS Fragmentation of **QTSILIQK**

Found in **IP100020687**, Tax\_Id=9606 Gene\_Symbol=SPINK1 Pancreatic secretory trypsin inhibitor

Experiment: 21 - NOPB3 Fraction: NOPB3

Match to Query 2085: 929.554648 from(465.784600,2+)

Title: OECHL100317\_03.8180.8180.2.dta

Data file \\Boromir\masse\Data LTQ-Orbitrap\Chrystelle Lacroix\Etude clinique sJPU\OECHL100317\_03.raw

**Monoisotopic mass of neutral peptide Mr(calc):** 929.554565**Fixed modifications:** Carbamidomethyl (C) (apply to specified residues or termini only)**Ions Score:** 59**Expect:** 4.7e-005**Matches :** 12/72 fragment ions using 16 most intense peaks ([help](#))

| # | b                 | b <sup>++</sup> | b*                | b <sup>*++</sup> | b <sup>0</sup> | b <sup>0++</sup> | Seq. | y                 | y <sup>++</sup> | y*                | y <sup>*++</sup> | y <sup>0</sup> | y <sup>0++</sup> | # |
|---|-------------------|-----------------|-------------------|------------------|----------------|------------------|------|-------------------|-----------------|-------------------|------------------|----------------|------------------|---|
| 1 | 129.065854        | 65.036565       | 112.039305        | 56.523291        |                |                  | Q    |                   |                 |                   |                  |                |                  | 8 |
| 2 | <b>230.113533</b> | 115.560405      | 213.086984        | 107.047130       | 212.102968     | 106.555122       | T    | <b>802.503281</b> | 401.755279      | 785.476732        | 393.242004       | 784.492716     | 392.749996       | 7 |
| 3 | 317.145561        | 159.076418      | 300.119012        | 150.563144       | 299.134996     | 150.071136       | S    | <b>701.455602</b> | 351.231439      | 684.429053        | 342.718165       | 683.445037     | 342.226157       | 6 |
| 4 | 430.229625        | 215.618450      | <b>413.203076</b> | 207.105176       | 412.219060     | 206.613168       | I    | <b>614.423574</b> | 307.715425      | 597.397025        | 299.202151       |                |                  | 5 |
| 5 | 543.313689        | 272.160483      | 526.287140        | 263.647208       | 525.303124     | 263.155200       | L    | <b>501.339510</b> | 251.173393      | 484.312961        | 242.660119       |                |                  | 4 |
| 6 | 656.397753        | 328.702515      | <b>639.371204</b> | 320.189240       | 638.387188     | 319.697232       | I    | <b>388.255446</b> | 194.631361      | 371.228897        | 186.118087       |                |                  | 3 |
| 7 | 784.456331        | 392.731804      | <b>767.429782</b> | 384.218529       | 766.445766     | 383.726521       | Q    | <b>275.171382</b> | 138.089329      | <b>258.144833</b> | 129.576055       |                |                  | 2 |
| 8 |                   |                 |                   |                  |                |                  | K    | <b>147.112804</b> | 74.060040       | 130.086255        | 65.546765        |                |                  | 1 |

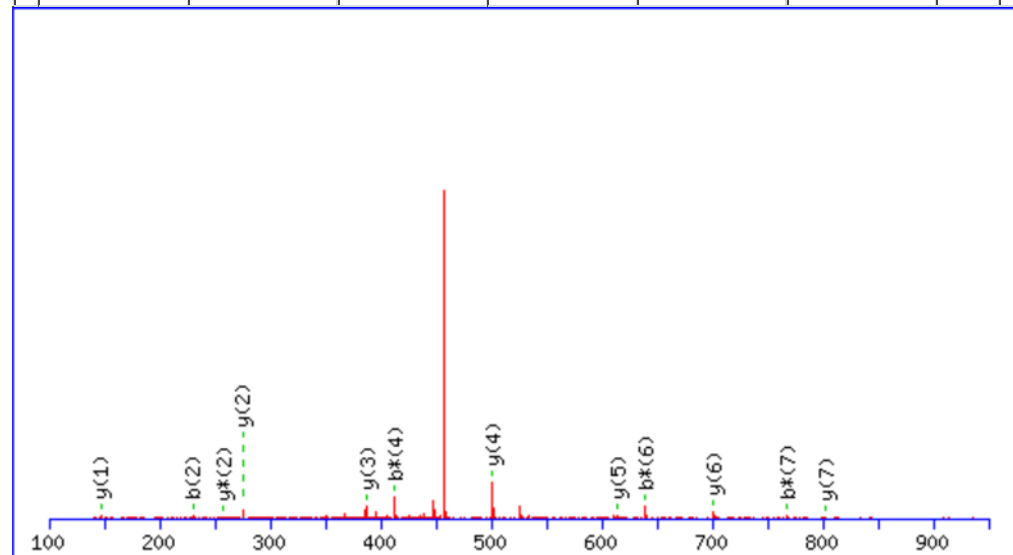

## Peptide View

MS/MS Fragmentation of **CQCPAGAALQADGR**



Found in **IPI00010737**, Tax\_Id=9606 Gene\_Symbol=THBD Thrombomodulin

**Experiment:** 21 - NOPB3 **Fraction:** NOPB3

Match to Query 9320: 1473.646648 from(737.830600,2+)

Title: OECHL100317\_03.7415.7415.2.dta

Data file \\Boromir\masse\Data LTQ-Orbitrap\Chrystelle Lacroix\Etude clinique sJPU\OECHL100317\_03.raw

**Monoisotopic mass of neutral peptide Mr(calc):** 1473.645279 **Fixed modifications:** Carbamidomethyl (C) (apply to specified residues or termini only) **Ions Score:** 53

**Expect:** 0.00025 **Matches :** 21/128 fragment ions using 39 most intense peaks ([help](#))

| #  | b                  | b <sup>++</sup> | b <sup>*</sup>    | b <sup>*++</sup>  | b <sup>0</sup> | b <sup>0++</sup> | Seq. | y                  | y <sup>++</sup>   | y <sup>*</sup> | y <sup>*++</sup> | y <sup>0</sup> | y <sup>0++</sup> | #  |
|----|--------------------|-----------------|-------------------|-------------------|----------------|------------------|------|--------------------|-------------------|----------------|------------------|----------------|------------------|----|
| 1  | 161.037925         | 81.022600       |                   |                   |                |                  | C    |                    |                   |                |                  |                |                  | 14 |
| 2  | <b>289.096503</b>  | 145.051890      | <b>272.069954</b> | 136.538615        |                |                  | Q    | 1314.621912        | 657.814594        | 1297.595363    | 649.301320       | 1296.611347    | 648.809312       | 13 |
| 3  | <b>449.127152</b>  | 225.067214      | 432.100603        | 216.553940        |                |                  | C    | <b>1186.563334</b> | <b>593.785305</b> | 1169.536785    | 585.272031       | 1168.552769    | 584.780023       | 12 |
| 4  | <b>546.179916</b>  | 273.593596      | 529.153367        | 265.080322        |                |                  | P    | <b>1026.532685</b> | 513.769981        | 1009.506136    | 505.256706       | 1008.522120    | 504.764698       | 11 |
| 5  | <b>617.217030</b>  | 309.112153      | 600.190481        | 300.598879        |                |                  | A    | <b>929.479921</b>  | 465.243599        | 912.453372     | 456.730324       | 911.469356     | 456.238316       | 10 |
| 6  | 674.238494         | 337.622885      | 657.211945        | 329.109611        |                |                  | G    | <b>858.442807</b>  | 429.725042        | 841.416258     | 421.211767       | 840.432242     | 420.719759       | 9  |
| 7  | 745.275608         | 373.141442      | <b>728.249059</b> | 364.628168        |                |                  | A    | 801.421343         | 401.214310        | 784.394794     | 392.701035       | 783.410778     | 392.209027       | 8  |
| 8  | <b>816.312722</b>  | 408.659999      | 799.286173        | 400.146725        |                |                  | A    | 730.384229         | 365.695753        | 713.357680     | 357.182478       | 712.373664     | 356.690470       | 7  |
| 9  | <b>929.396786</b>  | 465.202031      | 912.370237        | 456.688757        |                |                  | L    | <b>659.347115</b>  | 330.177196        | 642.320566     | 321.663921       | 641.336550     | 321.171913       | 6  |
| 10 | <b>1057.455364</b> | 529.231320      | 1040.428815       | 520.718046        |                |                  | Q    | <b>546.263051</b>  | 273.635164        | 529.236502     | 265.121889       | 528.252486     | 264.629881       | 5  |
| 11 | <b>1128.492478</b> | 564.749877      | 1111.465929       | <b>556.236603</b> |                |                  | A    | <b>418.204473</b>  | 209.605874        | 401.177924     | 201.092600       | 400.193908     | 200.600592       | 4  |
| 12 | <b>1243.519421</b> | 622.263349      | 1226.492872       | 613.750074        | 1225.508856    | 613.258066       | D    | 347.167359         | 174.087317        | 330.140810     | 165.574043       | 329.156794     | 165.082035       | 3  |
| 13 | 1300.540885        | 650.774081      | 1283.514336       | 642.260806        | 1282.530320    | 641.768798       | G    | <b>232.140416</b>  | 116.573846        | 215.113867     | 108.060571       |                |                  | 2  |
| 14 |                    |                 |                   |                   |                |                  | R    | 175.118952         | 88.063114         | 158.092403     | 79.549839        |                |                  | 1  |

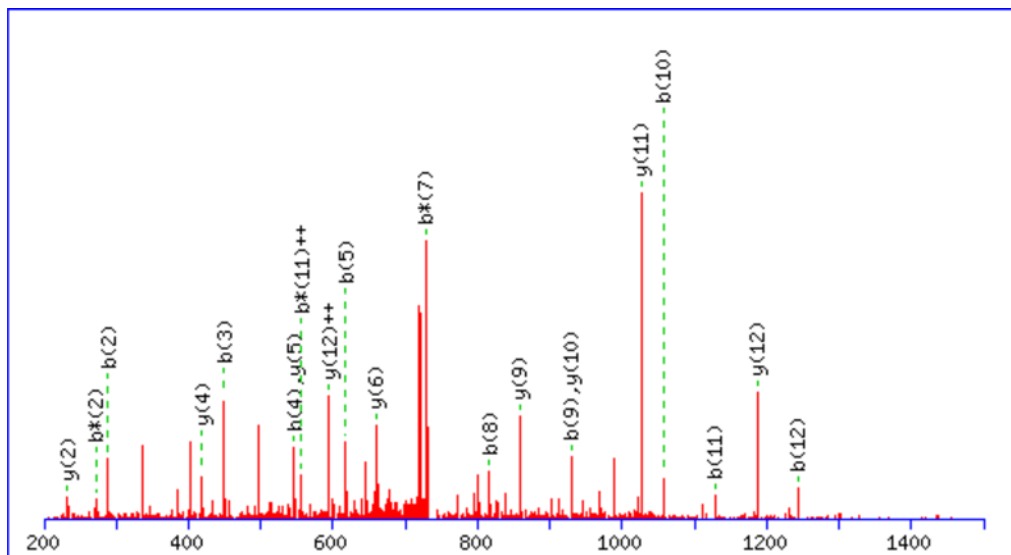

## Peptide View

MS/MS Fragmentation of **NPVLQQDAHSSVTITPQR**

Found in **IPI00410488**, Tax\_Id=9606 Gene\_Symbol=CD276 Isoform 1 of CD276 antigen

**Experiment:** 48 - PyA-3 **Fraction:** PyA-3

Match to Query 15882: 1990.022448 from(996.018500,2+)

Title: OECHL100317\_01.10231.10231.2.dta

Data file \\Boromir\masse\Data LTQ-Orbitrap\Chrystelle Lacroix\Etude clinique sJPU\OECHL100317\_01.raw

**Monoisotopic mass of neutral peptide Mr(calc):** 1990.023209 **Fixed modifications:** Carbamidomethyl (C) (apply to specified residues or termini only) **Ions Score:** 99

**Expect:** 1.8e-008 **Matches :** 41/186 fragment ions using 65 most intense peaks ([help](#))

| # | b                 | b <sup>++</sup> | b*                | b <sup>*++</sup> | b <sup>0</sup> | b <sup>0++</sup> | Seq. | y                  | y <sup>++</sup>   | y*          | y <sup>*++</sup>  | y <sup>0</sup> | y <sup>0++</sup>  | #  |
|---|-------------------|-----------------|-------------------|------------------|----------------|------------------|------|--------------------|-------------------|-------------|-------------------|----------------|-------------------|----|
| 1 | 115.050203        | 58.028740       | 98.023654         | 49.515465        |                |                  | N    |                    |                   |             |                   |                |                   | 18 |
| 2 | 212.102967        | 106.555121      | 195.076418        | 98.041847        |                |                  | P    | 1876.987553        | 938.997415        | 1859.961004 | 930.484140        | 1858.976988    | 929.992132        | 17 |
| 3 | <b>311.171381</b> | 156.089328      | <b>294.144832</b> | 147.576054       |                |                  | V    | <b>1779.934789</b> | 890.471033        | 1762.908240 | 881.957758        | 1761.924224    | 881.465750        | 16 |
| 4 | 424.255445        | 212.631361      | <b>407.228896</b> | 204.118086       |                |                  | L    | <b>1680.866375</b> | <b>840.936826</b> | 1663.839826 | 832.423551        | 1662.855810    | 831.931543        | 15 |
| 5 | <b>552.314023</b> | 276.660650      | <b>535.287474</b> | 268.147375       |                |                  | Q    | <b>1567.782311</b> | 784.394794        | 1550.755762 | <b>775.881519</b> | 1549.771746    | <b>775.389511</b> | 14 |
| 6 | <b>680.372601</b> | 340.689939      | <b>663.346052</b> | 332.176664       |                |                  | Q    | <b>1439.723733</b> | 720.365505        | 1422.697184 | 711.852230        | 1421.713168    | 711.360222        | 13 |

|    |                    |                   |                    |                   |                    |                   |          |                    |                   |                   |            |             |            |           |
|----|--------------------|-------------------|--------------------|-------------------|--------------------|-------------------|----------|--------------------|-------------------|-------------------|------------|-------------|------------|-----------|
| 7  | <b>795.399544</b>  | 398.203410        | 778.372995         | 389.690136        | 777.388979         | 389.198128        | <b>D</b> | <b>1311.665155</b> | 656.336215        | 1294.638606       | 647.822941 | 1293.654590 | 647.330933 | <b>12</b> |
| 8  | 866.436658         | 433.721967        | 849.410109         | 425.208693        | 848.426093         | 424.716685        | <b>A</b> | <b>1196.638212</b> | 598.822744        | 1179.611663       | 590.309470 | 1178.627647 | 589.817462 | <b>11</b> |
| 9  | 1003.495570        | <b>502.251423</b> | 986.469021         | 493.738149        | 985.485005         | 493.246141        | <b>H</b> | <b>1125.601098</b> | 563.304187        | 1108.574549       | 554.790913 | 1107.590533 | 554.298905 | <b>10</b> |
| 10 | <b>1090.527598</b> | 545.767437        | 1073.501049        | 537.254163        | 1072.517033        | 536.762155        | <b>S</b> | <b>988.542186</b>  | 494.774731        | 971.515637        | 486.261457 | 970.531621  | 485.769449 | <b>9</b>  |
| 11 | 1177.559626        | 589.283451        | 1160.533077        | 580.770177        | 1159.549061        | 580.278169        | <b>S</b> | <b>901.510158</b>  | 451.258717        | 884.483609        | 442.745443 | 883.499593  | 442.253435 | <b>8</b>  |
| 12 | <b>1276.628040</b> | 638.817658        | 1259.601491        | 630.304384        | 1258.617475        | 629.812376        | <b>V</b> | <b>814.478130</b>  | <b>407.742703</b> | 797.451581        | 399.229428 | 796.467565  | 398.737420 | <b>7</b>  |
| 13 | <b>1377.675719</b> | 689.341498        | 1360.649170        | <b>680.828223</b> | 1359.665154        | <b>680.336215</b> | <b>T</b> | <b>715.409716</b>  | 358.208496        | 698.383167        | 349.695221 | 697.399151  | 349.203213 | <b>6</b>  |
| 14 | <b>1490.759783</b> | 745.883530        | <b>1473.733234</b> | 737.370255        | <b>1472.749218</b> | 736.878247        | <b>I</b> | <b>614.362037</b>  | 307.684656        | 597.335488        | 299.171382 | 596.351472  | 298.679374 | <b>5</b>  |
| 15 | <b>1591.807462</b> | 796.407369        | 1574.780913        | 787.894095        | <b>1573.796897</b> | 787.402087        | <b>T</b> | <b>501.277973</b>  | 251.142624        | 484.251424        | 242.629350 | 483.267408  | 242.137342 | <b>4</b>  |
| 16 | 1688.860226        | 844.933751        | 1671.833677        | 836.420477        | 1670.849661        | 835.928469        | <b>P</b> | <b>400.230294</b>  | 200.618785        | <b>383.203745</b> | 192.105510 |             |            | <b>3</b>  |
| 17 | <b>1816.918804</b> | 908.963040        | <b>1799.892255</b> | 900.449766        | 1798.908239        | 899.957758        | <b>Q</b> | 303.177530         | 152.092403        | 286.150981        | 143.579128 |             |            | <b>2</b>  |
| 18 |                    |                   |                    |                   |                    |                   | <b>R</b> | 175.118952         | 88.063114         | 158.092403        | 79.549839  |             |            | <b>1</b>  |

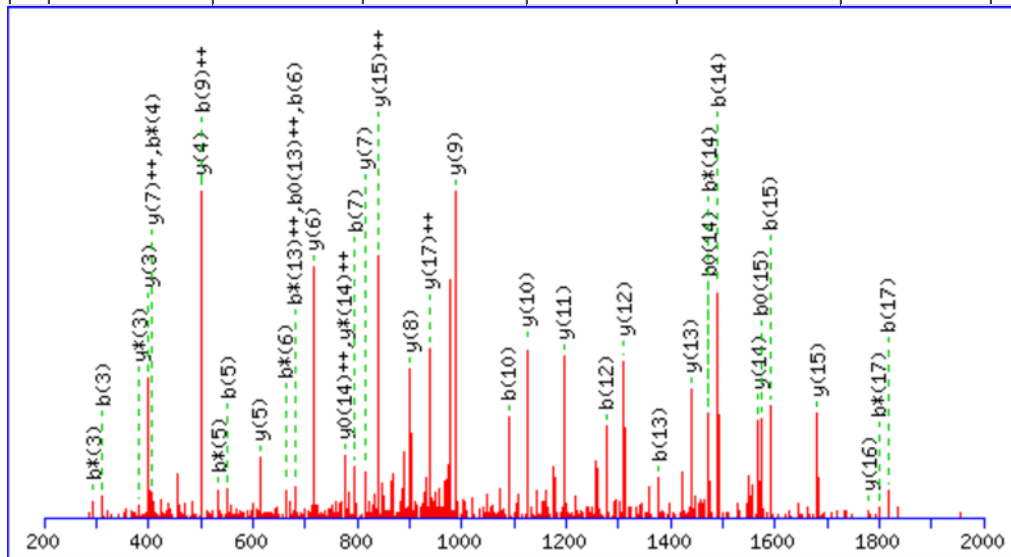

## Peptide View

MS/MS Fragmentation of **CPLQDFLR**

Found in **IP100003807**, Tax\_Id=9606 Gene\_Symbol=ACP2 Lysosomal acid phosphatase

Experiment: 48 - PyA-3 Fraction: PyA-3

Match to Query 5211: 1047.516648 from(524.765600,2+)

Title: OECHL100317\_01.17340.17340.2.dta

Data file \\Boromir\masse\Data LTQ-Orbitrap\Chrystelle Lacroix\Etude clinique sJPU\OECHL100317\_01.raw

**Monoisotopic mass of neutral peptide Mr(calc):** 1047.517151**Fixed modifications:** Carbamidomethyl (C) (apply to specified residues or termini only)**Ions Score:** 62**Expect:** 5.5e-005**Matches :** 14/64 fragment ions using 18 most intense peaks ([help](#))

| # | b                 | b <sup>++</sup> | b*                | b <sup>*++</sup>  | b <sup>0</sup> | b <sup>0++</sup> | Seq. | y                 | y <sup>++</sup> | y*         | y <sup>*++</sup> | y <sup>0</sup> | y <sup>0++</sup>  | # |
|---|-------------------|-----------------|-------------------|-------------------|----------------|------------------|------|-------------------|-----------------|------------|------------------|----------------|-------------------|---|
| 1 | 161.037925        | 81.022600       |                   |                   |                |                  | C    |                   |                 |            |                  |                |                   | 8 |
| 2 | <b>258.090689</b> | 129.548982      |                   |                   |                |                  | P    | <b>888.493779</b> | 444.750528      | 871.467230 | 436.237253       | 870.483214     | <b>435.745245</b> | 7 |
| 3 | <b>371.174753</b> | 186.091015      |                   |                   |                |                  | L    | <b>791.441015</b> | 396.224146      | 774.414466 | 387.710871       | 773.430450     | 387.218863        | 6 |
| 4 | 499.233331        | 250.120304      | 482.206782        | <b>241.607029</b> |                |                  | Q    | <b>678.356951</b> | 339.682114      | 661.330402 | 331.168839       | 660.346386     | 330.676831        | 5 |
| 5 | <b>614.260274</b> | 307.633775      | <b>597.233725</b> | 299.120501        | 596.249709     | 298.628493       | D    | <b>550.298373</b> | 275.652825      | 533.271824 | 267.139550       | 532.287808     | 266.647542        | 4 |
| 6 | 761.328688        | 381.167982      | 744.302139        | 372.654708        | 743.318123     | 372.162700       | F    | <b>435.271430</b> | 218.139353      | 418.244881 | 209.626079       |                |                   | 3 |
| 7 | <b>874.412752</b> | 437.710014      | 857.386203        | 429.196740        | 856.402187     | 428.704732       | L    | <b>288.203016</b> | 144.605146      | 271.176467 | 136.091872       |                |                   | 2 |
| 8 |                   |                 |                   |                   |                |                  | R    | <b>175.118952</b> | 88.063114       | 158.092403 | 79.549840        |                |                   | 1 |

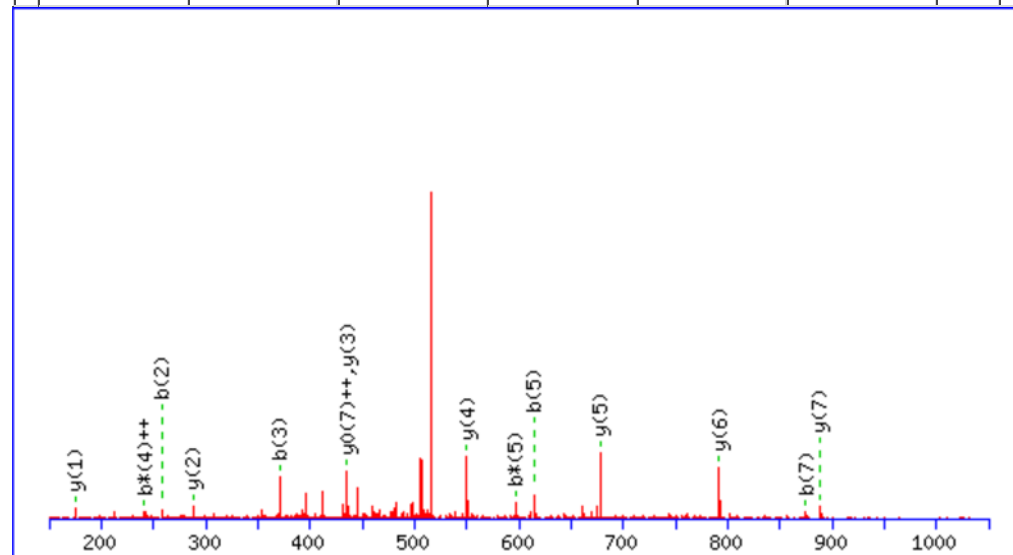

## Peptide View

MS/MS Fragmentation of **LTEPADTITDAVK**

Found in **IP100304808**, Tax\_Id=9606 Gene\_Symbol=KLK1 Isoform 1 of Kallikrein-1

**Experiment:** 48 - PyA-3 **Fraction:** PyA-3

Match to Query 9843: 1372.708648 from(687.361600,2+)

Title: OECHL100317\_01.12873.12873.2.dta

Data file \\Boromir\masse\Data LTQ-Orbitrap\Chrystelle Lacroix\Etude clinique sJPU\OECHL100317\_01.raw

**Monoisotopic mass of neutral peptide Mr(calc):** 1372.708572 **Fixed modifications:** Carbamidomethyl (C) (apply to specified residues or termini only) **Ions Score:** 71

**Expect:** 1.2e-005 **Matches :** 36/112 fragment ions using 67 most intense peaks ([help](#))

| #  | b                  | b <sup>++</sup> | b <sup>0</sup>     | b <sup>0++</sup> | Seq. | y                  | y <sup>++</sup>   | y <sup>*</sup>     | y <sup>*++</sup>  | y <sup>0</sup>     | y <sup>0++</sup>  | #  |
|----|--------------------|-----------------|--------------------|------------------|------|--------------------|-------------------|--------------------|-------------------|--------------------|-------------------|----|
| 1  | 114.091340         | 57.549308       |                    |                  | L    |                    |                   |                    |                   |                    |                   | 13 |
| 2  | <b>215.139019</b>  | 108.073147      | <b>197.128454</b>  | 99.067865        | T    | <b>1260.631790</b> | 630.819533        | 1243.605241        | 622.306259        | 1242.621225        | 621.814251        | 12 |
| 3  | <b>344.181612</b>  | 172.594444      | <b>326.171047</b>  | 163.589162       | E    | <b>1159.584111</b> | <b>580.295694</b> | <b>1142.557562</b> | <b>571.782419</b> | <b>1141.573546</b> | <b>571.290411</b> | 11 |
| 4  | 441.234376         | 221.120826      | 423.223811         | 212.115544       | P    | <b>1030.541518</b> | <b>515.774397</b> | 1013.514969        | 507.261123        | <b>1012.530953</b> | 506.769115        | 10 |
| 5  | 512.271490         | 256.639383      | 494.260925         | 247.634101       | A    | <b>933.488754</b>  | <b>467.248015</b> | 916.462205         | <b>458.734741</b> | 915.478189         | <b>458.242733</b> | 9  |
| 6  | <b>627.298433</b>  | 314.152855      | <b>609.287868</b>  | 305.147572       | D    | <b>862.451640</b>  | 431.729458        | 845.425091         | 423.216184        | 844.441075         | 422.724176        | 8  |
| 7  | <b>728.346112</b>  | 364.676694      | <b>710.335547</b>  | 355.671412       | T    | <b>747.424697</b>  | 374.215987        | 730.398148         | 365.702712        | <b>729.414132</b>  | 365.210704        | 7  |
| 8  | <b>841.430176</b>  | 421.218726      | 823.419611         | 412.213444       | I    | <b>646.377018</b>  | 323.692147        | 629.350469         | 315.178873        | 628.366453         | 314.686865        | 6  |
| 9  | 942.477855         | 471.742566      | 924.467290         | 462.737283       | T    | <b>533.292954</b>  | 267.150115        | <b>516.266405</b>  | 258.636841        | <b>515.282389</b>  | 258.144833        | 5  |
| 10 | <b>1057.504798</b> | 529.256037      | 1039.494233        | 520.250755       | D    | <b>432.245275</b>  | 216.626276        | 415.218726         | 208.113001        | 414.234710         | 207.620993        | 4  |
| 11 | 1128.541912        | 564.774594      | 1110.531347        | 555.769312       | A    | <b>317.218332</b>  | 159.112804        | 300.191783         | 150.599530        |                    |                   | 3  |
| 12 | <b>1227.610326</b> | 614.308801      | <b>1209.599761</b> | 605.303519       | V    | <b>246.181218</b>  | 123.594247        | 229.154669         | 115.080973        |                    |                   | 2  |
| 13 |                    |                 |                    |                  | K    | 147.112804         | 74.060040         | 130.086255         | 65.546765         |                    |                   | 1  |

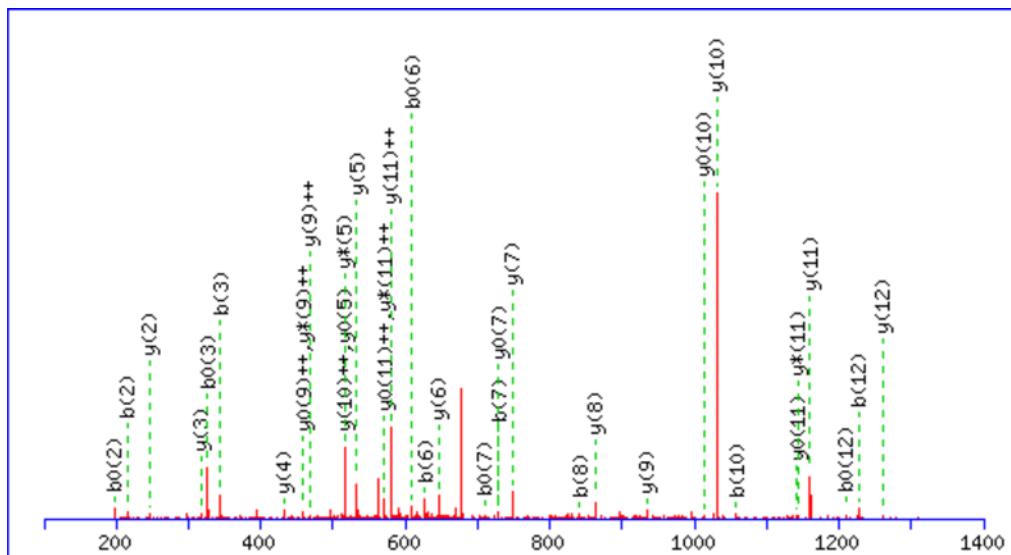

## Peptide View

MS/MS Fragmentation of **GQLPISVTCIADEIGAR**

Found in **IPI00240345**, Tax\_Id=9606 Gene\_Symbol=CLEC14A C-type lectin domain family 14 member A

**Experiment:** 48 - PyA-3 **Fraction:** PyA-3

Match to Query 14570: 1798.925448 from(900.470000,2+)

Title: OECHL100317\_01.21247.21247.2.dta

Data file \\Boromir\masse\Data LTQ-Orbitrap\Chrystelle Lacroix\Etude clinique sJPU\OECHL100317\_01.raw

**Monoisotopic mass of neutral peptide Mr(calc):** 1798.924728 **Fixed modifications:** Carbamidomethyl (C) (apply to specified residues or termini only) **Ions Score:** 82

**Expect:** 8.1e-007 **Matches :** 23/172 fragment ions using 47 most intense peaks ([help](#))

| # | b                 | b <sup>++</sup> | b*                | b* <sup>++</sup> | b <sup>0</sup>    | b <sup>0++</sup> | Seq.     | y                  | y <sup>++</sup>   | y*          | y* <sup>++</sup> | y <sup>0</sup> | y <sup>0++</sup> | #  |
|---|-------------------|-----------------|-------------------|------------------|-------------------|------------------|----------|--------------------|-------------------|-------------|------------------|----------------|------------------|----|
| 1 | 58.028740         | 29.518008       |                   |                  |                   |                  | <b>G</b> |                    |                   |             |                  |                |                  | 17 |
| 2 | 186.087318        | 93.547297       | 169.060769        | 85.034023        |                   |                  | <b>Q</b> | 1742.910548        | 871.958912        | 1725.883999 | 863.445638       | 1724.899983    | 862.953630       | 16 |
| 3 | <b>299.171382</b> | 150.089329      | 282.144833        | 141.576055       |                   |                  | <b>L</b> | <b>1614.851970</b> | <b>807.929623</b> | 1597.825421 | 799.416349       | 1596.841405    | 798.924340       | 15 |
| 4 | 396.224146        | 198.615711      | <b>379.197597</b> | 190.102436       |                   |                  | <b>P</b> | <b>1501.767906</b> | <b>751.387591</b> | 1484.741357 | 742.874317       | 1483.757341    | 742.382309       | 14 |
| 5 | <b>509.308210</b> | 255.157743      | 492.281661        | 246.644468       |                   |                  | <b>I</b> | <b>1404.715142</b> | 702.861209        | 1387.688593 | 694.347935       | 1386.704577    | 693.855927       | 13 |
| 6 | <b>596.340238</b> | 298.673757      | 579.313689        | 290.160483       | <b>578.329673</b> | 289.668475       | <b>S</b> | <b>1291.631078</b> | 646.319177        | 1274.604529 | 637.805903       | 1273.620513    | 637.313895       | 12 |

|    |                    |            |                    |            |             |            |   |                    |            |             |            |             |            |           |
|----|--------------------|------------|--------------------|------------|-------------|------------|---|--------------------|------------|-------------|------------|-------------|------------|-----------|
| 7  | 695.408652         | 348.207964 | 678.382103         | 339.694689 | 677.398087  | 339.202681 | V | <b>1204.599050</b> | 602.803163 | 1187.572501 | 594.289889 | 1186.588485 | 593.797881 | <b>11</b> |
| 8  | 796.456331         | 398.731804 | 779.429782         | 390.218529 | 778.445766  | 389.726521 | T | <b>1105.530636</b> | 553.268956 | 1088.504087 | 544.755682 | 1087.520071 | 544.263674 | <b>10</b> |
| 9  | 956.486980         | 478.747128 | 939.460431         | 470.233854 | 938.476415  | 469.741846 | C | <b>1004.482957</b> | 502.745117 | 987.456408  | 494.231842 | 986.472392  | 493.739834 | <b>9</b>  |
| 10 | 1069.571044        | 535.289160 | 1052.544495        | 526.775886 | 1051.560479 | 526.283878 | I | <b>844.452308</b>  | 422.729792 | 827.425759  | 414.216518 | 826.441743  | 413.724510 | <b>8</b>  |
| 11 | 1140.608158        | 570.807717 | <b>1123.581609</b> | 562.294443 | 1122.597593 | 561.802435 | A | <b>731.368244</b>  | 366.187760 | 714.341695  | 357.674486 | 713.357679  | 357.182478 | <b>7</b>  |
| 12 | <b>1255.635101</b> | 628.321189 | 1238.608552        | 619.807914 | 1237.624536 | 619.315906 | D | <b>660.331130</b>  | 330.669203 | 643.304581  | 322.155929 | 642.320565  | 321.663921 | <b>6</b>  |
| 13 | 1384.677694        | 692.842485 | 1367.651145        | 684.329211 | 1366.667129 | 683.837203 | E | <b>545.304187</b>  | 273.155732 | 528.277638  | 264.642457 | 527.293622  | 264.150449 | <b>5</b>  |
| 14 | 1497.761758        | 749.384517 | 1480.735209        | 740.871243 | 1479.751193 | 740.379235 | I | <b>416.261594</b>  | 208.634435 | 399.235045  | 200.121160 |             |            | <b>4</b>  |
| 15 | 1554.783222        | 777.895249 | 1537.756673        | 769.381975 | 1536.772657 | 768.889967 | G | <b>303.177530</b>  | 152.092403 | 286.150981  | 143.579128 |             |            | <b>3</b>  |
| 16 | <b>1625.820336</b> | 813.413806 | 1608.793787        | 804.900532 | 1607.809771 | 804.408524 | A | 246.156066         | 123.581671 | 229.129517  | 115.068396 |             |            | <b>2</b>  |
| 17 |                    |            |                    |            |             |            | R | 175.118952         | 88.063114  | 158.092403  | 79.549839  |             |            | <b>1</b>  |

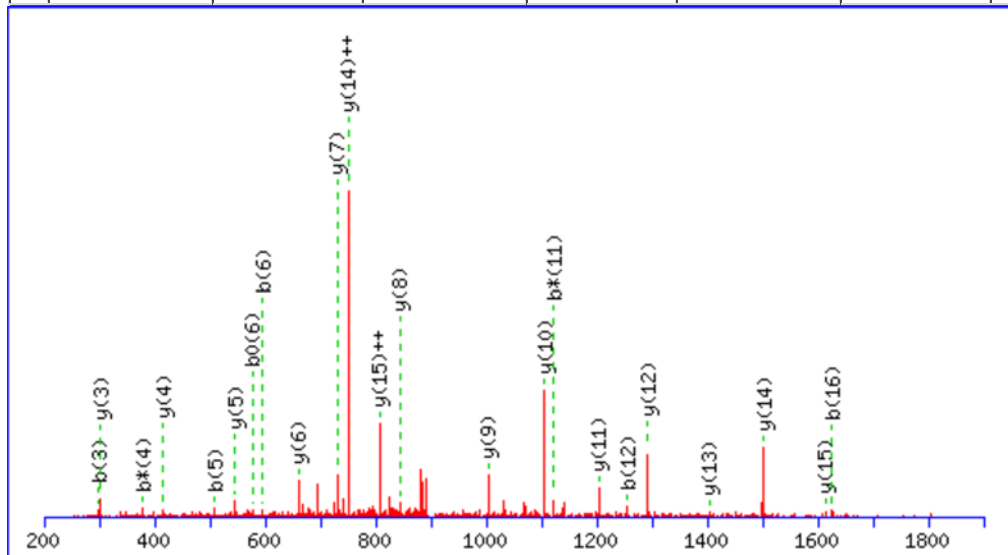

## Peptide View

MS/MS Fragmentation of **LLIYDASNLETGVPSR**

Found in **IP100003111**, Tax\_Id=9606 Gene\_Symbol=LOC652694 Ig kappa chain V-I region AU

Experiment: 48 - PyA-3 Fraction: PyA-3

Match to Query 14180: 1746.916648 from(874.465600,2+)

Title: OECHL100317\_01.17307.17307.2.dta

Data file \\Boromir\masse\Data LTQ-Orbitrap\Chrystelle Lacroix\Etude clinique sJPU\OECHL100317\_01.raw

**Monoisotopic mass of neutral peptide Mr(calc):** 1746.915192**Fixed modifications:** Carbamidomethyl (C) (apply to specified residues or termini only)**Ions Score:** 75**Expect:** 3.3e-006**Matches :** 25/156 fragment ions using 44 most intense peaks ([help](#))

| #  | b                  | b <sup>++</sup> | b*                 | b <sup>+++</sup> | b <sup>0</sup> | b <sup>0++</sup> | Seq. | y                  | y <sup>++</sup>   | y*          | y <sup>+++</sup>  | y <sup>0</sup>     | y <sup>0++</sup> | #  |
|----|--------------------|-----------------|--------------------|------------------|----------------|------------------|------|--------------------|-------------------|-------------|-------------------|--------------------|------------------|----|
| 1  | 114.091340         | 57.549308       |                    |                  |                |                  | L    |                    |                   |             |                   |                    |                  | 16 |
| 2  | 227.175404         | 114.091340      |                    |                  |                |                  | L    | 1634.838427        | 817.922852        | 1617.811878 | 809.409577        | 1616.827862        | 808.917569       | 15 |
| 3  | <b>340.259468</b>  | 170.633372      |                    |                  |                |                  | I    | <b>1521.754363</b> | 761.380820        | 1504.727814 | <b>752.867545</b> | 1503.743798        | 752.375537       | 14 |
| 4  | 503.322797         | 252.165036      |                    |                  |                |                  | Y    | 1408.670299        | <b>704.838788</b> | 1391.643750 | 696.325513        | <b>1390.659734</b> | 695.833505       | 13 |
| 5  | <b>618.349740</b>  | 309.678508      |                    |                  | 600.339175     | 300.673226       | D    | <b>1245.606970</b> | 623.307123        | 1228.580421 | 614.793849        | 1227.596405        | 614.301841       | 12 |
| 6  | 689.386854         | 345.197065      |                    |                  | 671.376289     | 336.191782       | A    | <b>1130.580027</b> | 565.793652        | 1113.553478 | 557.280377        | 1112.569462        | 556.788369       | 11 |
| 7  | 776.418882         | 388.713079      |                    |                  | 758.408317     | 379.707796       | S    | <b>1059.542913</b> | 530.275095        | 1042.516364 | 521.761820        | 1041.532348        | 521.269812       | 10 |
| 8  | 890.461809         | 445.734542      | 873.435260         | 437.221268       | 872.451244     | 436.729260       | N    | <b>972.510885</b>  | 486.759081        | 955.484336  | 478.245806        | 954.500320         | 477.753798       | 9  |
| 9  | <b>1003.545873</b> | 502.276574      | 986.519324         | 493.763300       | 985.535308     | 493.271292       | L    | <b>858.467958</b>  | 429.737617        | 841.441409  | 421.224343        | 840.457393         | 420.732335       | 8  |
| 10 | <b>1132.588466</b> | 566.797871      | 1115.561917        | 558.284597       | 1114.577901    | 557.792588       | E    | <b>745.383894</b>  | 373.195585        | 728.357345  | 364.682311        | <b>727.373329</b>  | 364.190303       | 7  |
| 11 | <b>1233.636145</b> | 617.321710      | 1216.609596        | 608.808436       | 1215.625580    | 608.316428       | T    | <b>616.341301</b>  | 308.674289        | 599.314752  | 300.161014        | 598.330736         | 299.669006       | 6  |
| 12 | <b>1290.657609</b> | 645.832442      | 1273.631060        | 637.319168       | 1272.647044    | 636.827160       | G    | <b>515.293622</b>  | 258.150449        | 498.267073  | 249.637175        | 497.283057         | 249.145167       | 5  |
| 13 | <b>1389.726023</b> | 695.366649      | <b>1372.699474</b> | 686.853375       | 1371.715458    | 686.361367       | V    | <b>458.272158</b>  | 229.639717        | 441.245609  | 221.126443        | 440.261593         | 220.634435       | 4  |
| 14 | 1486.778787        | 743.893032      | 1469.752238        | 735.379757       | 1468.768222    | 734.887749       | P    | <b>359.203744</b>  | 180.105510        | 342.177195  | 171.592236        | <b>341.193179</b>  | 171.100228       | 3  |
| 15 | <b>1573.810815</b> | 787.409046      | 1556.784266        | 778.895771       | 1555.800250    | 778.403763       | S    | 262.150980         | 131.579128        | 245.124431  | 123.065854        | 244.140415         | 122.573846       | 2  |
| 16 |                    |                 |                    |                  |                |                  | R    | 175.118952         | 88.063114         | 158.092403  | 79.549839         |                    |                  | 1  |



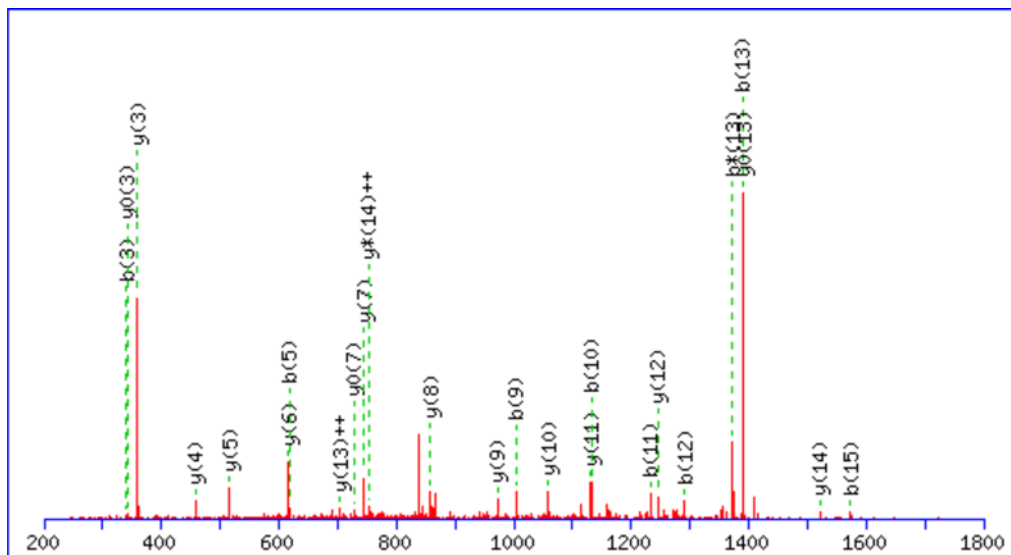

## Peptide View

MS/MS Fragmentation of **SKEDSNSTESKSSSEEDGQLK**

Found in **IPI00012734**, Tax\_Id=9606 Gene\_Symbol=DMP1 Isoform 1 of Dentin matrix acidic phosphoprotein 1

**Experiment:** 48 - PyA-3 **Fraction:** PyA-3

Match to Query 17617: 2270.999448 from(1136.507000,2+)

Title: OECHL100317\_01.2376.2376.2.dta

Data file \\Boromir\masse\Data LTQ-Orbitrap\Chrystelle Lacroix\Etude clinique sJPU\OECHL100317\_01.raw

**Monoisotopic mass of neutral peptide Mr(calc):** 2270.998581 **Fixed modifications:** Carbamidomethyl (C) (apply to specified residues or termini only) **Ions Score:** 76

**Expect:** 2.1e-006 **Matches :** 29/230 fragment ions using 51 most intense peaks ([help](#))

| # | b                 | b <sup>++</sup> | b <sup>*</sup> | b <sup>*++</sup> | b <sup>0</sup> | b <sup>0++</sup> | Seq. | y                  | y <sup>++</sup>   | y <sup>*</sup> | y <sup>*++</sup> | y <sup>0</sup> | y <sup>0++</sup> |
|---|-------------------|-----------------|----------------|------------------|----------------|------------------|------|--------------------|-------------------|----------------|------------------|----------------|------------------|
| 1 | 88.039304         | 44.523290       |                |                  | 70.028739      | 35.518008        | S    |                    |                   |                |                  |                |                  |
| 2 | 216.134267        | 108.570771      | 199.107718     | 100.057497       | 198.123702     | 99.565489        | K    | 2184.973868        | 1092.990572       | 2167.947319    | 1084.477297      | 2166.963303    | 1083.9852        |
| 3 | 345.176860        | 173.092068      | 328.150311     | 164.578793       | 327.166295     | 164.086785       | E    | 2056.878905        | 1028.943090       | 2039.852356    | 1020.429816      | 2038.868340    | 1019.9378        |
| 4 | <b>460.203803</b> | 230.605539      | 443.177254     | 222.092265       | 442.193238     | 221.600257       | D    | <b>1927.836312</b> | 964.421794        | 1910.809763    | 955.908520       | 1909.825747    | 955.4165         |
| 5 | 547.235831        | 274.121554      | 530.209282     | 265.608279       | 529.225266     | 265.116271       | S    | <b>1812.809369</b> | <b>906.908323</b> | 1795.782820    | 898.395048       | 1794.798804    | 897.9030         |
| 6 | <b>661.278758</b> | 331.143017      | 644.252209     | 322.629743       | 643.268193     | 322.137735       | N    | 1725.777341        | 863.392309        | 1708.750792    | 854.879034       | 1707.766776    | 854.3870         |

|    |                    |                    |                    |                   |                    |                   |   |                    |            |                   |            |             |          |
|----|--------------------|--------------------|--------------------|-------------------|--------------------|-------------------|---|--------------------|------------|-------------------|------------|-------------|----------|
| 7  | <b>748.310786</b>  | 374.659031         | 731.284237         | 366.145757        | 730.300221         | 365.653749        | S | <b>1611.734414</b> | 806.370845 | 1594.707865       | 797.857571 | 1593.723849 | 797.3655 |
| 8  | 849.358465         | 425.182871         | 832.331916         | 416.669596        | 831.347900         | 416.177588        | T | <b>1524.702386</b> | 762.854831 | 1507.675837       | 754.341557 | 1506.691821 | 753.8495 |
| 9  | <b>978.401058</b>  | 489.704167         | 961.374509         | 481.190893        | 960.390493         | 480.698885        | E | <b>1423.654707</b> | 712.330992 | 1406.628158       | 703.817717 | 1405.644142 | 703.3257 |
| 10 | 1065.433086        | 533.220181         | 1048.406537        | 524.706907        | 1047.422521        | 524.214899        | S | <b>1294.612114</b> | 647.809695 | 1277.585565       | 639.296421 | 1276.601549 | 638.8044 |
| 11 | <b>1193.528049</b> | 597.267663         | 1176.501500        | 588.754388        | 1175.517484        | 588.262380        | K | 1207.580086        | 604.293681 | 1190.553537       | 595.780407 | 1189.569521 | 595.2883 |
| 12 | 1280.560077        | 640.783677         | 1263.533528        | 632.270402        | 1262.549512        | 631.778394        | S | <b>1079.485123</b> | 540.246200 | 1062.458574       | 531.732925 | 1061.474558 | 531.2409 |
| 13 | <b>1367.592105</b> | 684.299691         | 1350.565556        | 675.786416        | 1349.581540        | 675.294408        | S | <b>992.453095</b>  | 496.730186 | 975.426546        | 488.216911 | 974.442530  | 487.7249 |
| 14 | 1454.624133        | 727.815705         | 1437.597584        | 719.302430        | 1436.613568        | 718.810422        | S | <b>905.421067</b>  | 453.214172 | 888.394518        | 444.700897 | 887.410502  | 444.2088 |
| 15 | <b>1583.666726</b> | 792.337001         | 1566.640177        | 783.823727        | 1565.656161        | 783.331719        | E | <b>818.389039</b>  | 409.698158 | 801.362490        | 401.184883 | 800.378474  | 400.6928 |
| 16 | <b>1712.709319</b> | 856.858298         | 1695.682770        | 848.345023        | 1694.698754        | 847.853015        | E | <b>689.346446</b>  | 345.176861 | <b>672.319897</b> | 336.663587 | 671.335881  | 336.1715 |
| 17 | <b>1827.736262</b> | 914.371769         | 1810.709713        | <b>905.858495</b> | <b>1809.725697</b> | <b>905.366487</b> | D | <b>560.303853</b>  | 280.655565 | 543.277304        | 272.142290 | 542.293288  | 271.6502 |
| 18 | 1884.757726        | 942.882501         | 1867.731177        | 934.369227        | 1866.747161        | 933.877219        | G | <b>445.276910</b>  | 223.142093 | 428.250361        | 214.628818 |             |          |
| 19 | 2012.816304        | <b>1006.911790</b> | <b>1995.789755</b> | 998.398516        | 1994.805739        | 997.906508        | Q | 388.255446         | 194.631361 | 371.228897        | 186.118087 |             |          |
| 20 | 2125.900368        | 1063.453822        | 2108.873819        | 1054.940547       | 2107.889803        | 1054.448539       | L | 260.196868         | 130.602072 | 243.170319        | 122.088798 |             |          |
| 21 |                    |                    |                    |                   |                    |                   | K | 147.112804         | 74.060040  | 130.086255        | 65.546765  |             |          |

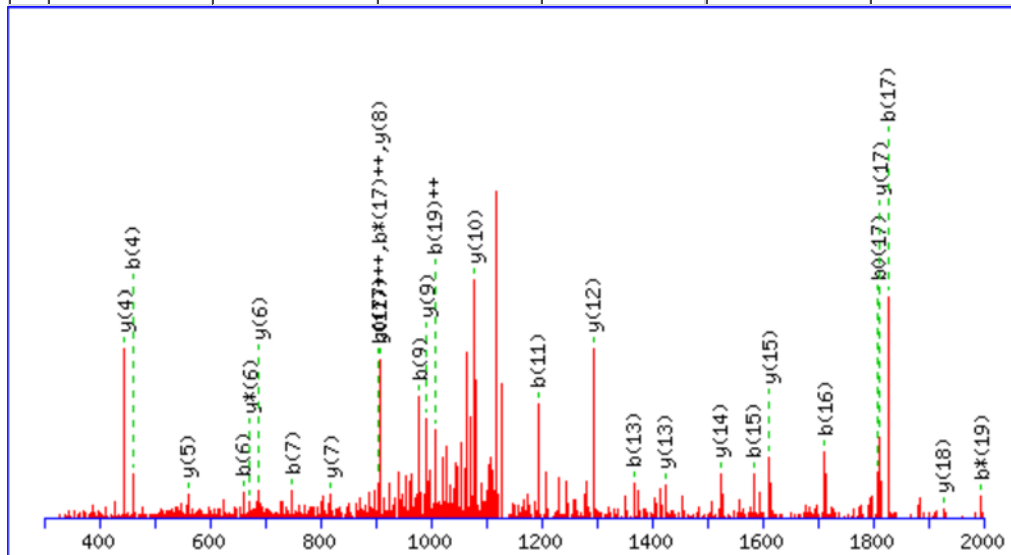

## Peptide View

MS/MS Fragmentation of **AVGLLTVISK**Found in **IPI00013446**, Tax\_Id=9606 Gene\_Symbol=PSCA Prostate stem cell antigen**Experiment:** 48 - PyA-3 **Fraction:** PyA-3

Match to Query 4467: 999.633848 from(500.824200,2+)

Title: OECHL100317\_01.17502.17502.2.dta

Data file \\Boromir\masse\Data LTQ-Orbitrap\Chrystelle Lacroix\Etude clinique sJPU\OECHL100317\_01.raw

**Monoisotopic mass of neutral peptide Mr(calc):** 999.632828**Fixed modifications:** Carbamidomethyl (C) (apply to specified residues or termini only)**Ions Score:** 50**Expect:** 0.00011**Matches :** 13/78 fragment ions using 34 most intense peaks ([help](#))

| #  | b                 | b <sup>++</sup>   | b <sup>0</sup> | b <sup>0++</sup> | Seq. | y                 | y <sup>++</sup> | y*         | y* <sup>++</sup> | y <sup>0</sup> | y <sup>0++</sup> | #  |
|----|-------------------|-------------------|----------------|------------------|------|-------------------|-----------------|------------|------------------|----------------|------------------|----|
| 1  | 72.044390         | 36.525833         |                |                  | A    |                   |                 |            |                  |                |                  | 10 |
| 2  | <b>171.112804</b> | 86.060040         |                |                  | V    | 929.602995        | 465.305136      | 912.576446 | 456.791861       | 911.592430     | 456.299853       | 9  |
| 3  | <b>228.134268</b> | 114.570772        |                |                  | G    | <b>830.534581</b> | 415.770929      | 813.508032 | 407.257654       | 812.524016     | 406.765646       | 8  |
| 4  | <b>341.218332</b> | <b>171.112804</b> |                |                  | L    | 773.513117        | 387.260197      | 756.486568 | 378.746922       | 755.502552     | 378.254914       | 7  |
| 5  | <b>454.302396</b> | 227.654836        |                |                  | L    | <b>660.429053</b> | 330.718165      | 643.402504 | 322.204890       | 642.418488     | 321.712882       | 6  |
| 6  | <b>555.350075</b> | 278.178676        | 537.339510     | 269.173393       | T    | <b>547.344989</b> | 274.176133      | 530.318440 | 265.662858       | 529.334424     | 265.170850       | 5  |
| 7  | <b>654.418489</b> | 327.712883        | 636.407924     | 318.707600       | V    | 446.297310        | 223.652293      | 429.270761 | 215.139018       | 428.286745     | 214.647010       | 4  |
| 8  | <b>767.502553</b> | 384.254915        | 749.491988     | 375.249632       | I    | 347.228896        | 174.118086      | 330.202347 | 165.604811       | 329.218331     | 165.112803       | 3  |
| 9  | <b>854.534581</b> | 427.770929        | 836.524016     | 418.765646       | S    | <b>234.144832</b> | 117.576054      | 217.118283 | 109.062779       | 216.134267     | 108.570771       | 2  |
| 10 |                   |                   |                |                  | K    | 147.112804        | 74.060040       | 130.086255 | 65.546765        |                |                  | 1  |

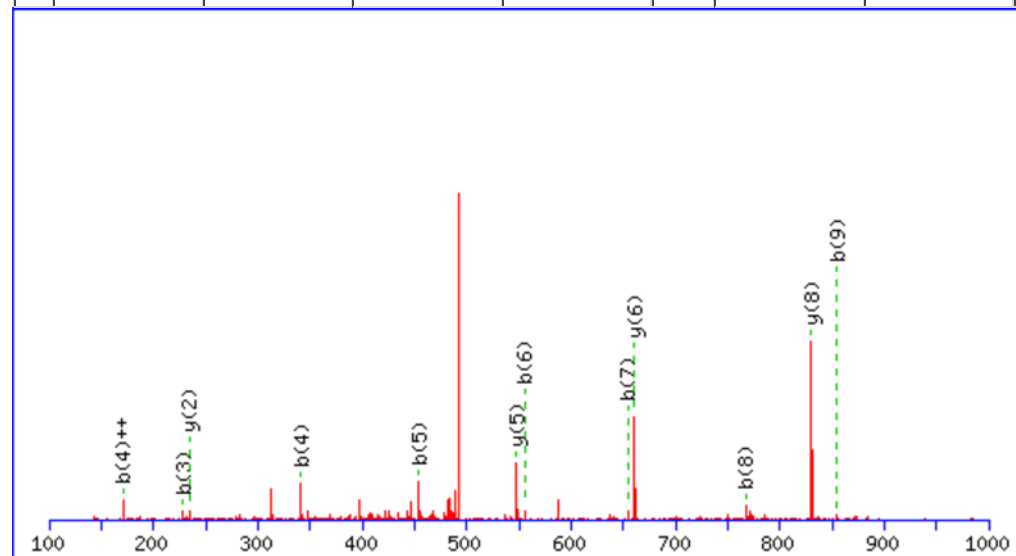

## Peptide View

MS/MS Fragmentation of **NKDGVLVDEFGLPQIPAS**

Found in **IP100100796**, Tax\_Id=9606 Gene\_Symbol=CHMP5 Charged multivesicular body protein 5

**Experiment:** 48 - PyA-3 **Fraction:** PyA-3

Match to Query 15280: 1897.980848 from(949.997700,2+)

Title: OECHL100317\_01.20671.20671.2.dta

Data file \\Boromir\masse\Data LTQ-Orbitrap\Chrystelle Lacroix\Etude clinique sJPU\OECHL100317\_01.raw

**Monoisotopic mass of neutral peptide Mr(calc):** 1897.978546 **Fixed modifications:** Carbamidomethyl (C) (apply to specified residues or termini only) **Ions Score:** 56

**Expect:** 0.00041 **Matches :** 32/192 fragment ions using 64 most intense peaks ([help](#))

| #  | b                  | b <sup>++</sup>   | b*                 | b <sup>*++</sup>  | b <sup>0</sup>     | b <sup>0++</sup>  | Seq. | y                  | y <sup>++</sup> | y*          | y <sup>*++</sup> | y <sup>0</sup>    | y <sup>0++</sup>  | #  |
|----|--------------------|-------------------|--------------------|-------------------|--------------------|-------------------|------|--------------------|-----------------|-------------|------------------|-------------------|-------------------|----|
| 1  | 115.050203         | 58.028740         | 98.023654          | 49.515465         |                    |                   | N    |                    |                 |             |                  |                   |                   | 18 |
| 2  | 243.145166         | 122.076221        | 226.118617         | 113.562947        |                    |                   | K    | 1784.942893        | 892.975085      | 1767.916344 | 884.461810       | 1766.932328       | 883.969802        | 17 |
| 3  | <b>358.172109</b>  | 179.589693        | 341.145560         | 171.076418        | <b>340.161544</b>  | 170.584410        | D    | 1656.847930        | 828.927603      | 1639.821381 | 820.414329       | 1638.837365       | 819.922321        | 16 |
| 4  | 415.193573         | 208.100425        | 398.167024         | 199.587150        | 397.183008         | 199.095142        | G    | <b>1541.820987</b> | 771.414132      | 1524.794438 | 762.900857       | 1523.810422       | 762.408849        | 15 |
| 5  | <b>514.261987</b>  | 257.634632        | <b>497.235438</b>  | 249.121357        | 496.251422         | 248.629349        | V    | 1484.799523        | 742.903400      | 1467.772974 | 734.390125       | 1466.788958       | 733.898117        | 14 |
| 6  | <b>627.346051</b>  | 314.176664        | 610.319502         | 305.663389        | 609.335486         | 305.171381        | L    | <b>1385.731109</b> | 693.369193      | 1368.704560 | 684.855918       | 1367.720544       | 684.363910        | 13 |
| 7  | <b>726.414465</b>  | 363.710871        | 709.387916         | 355.197596        | 708.403900         | 354.705588        | V    | <b>1272.647045</b> | 636.827160      | 1255.620496 | 628.313886       | 1254.636480       | <b>627.821878</b> | 12 |
| 8  | <b>841.441408</b>  | 421.224342        | 824.414859         | 412.711068        | 823.430843         | 412.219060        | D    | <b>1173.578631</b> | 587.292954      | 1156.552082 | 578.779679       | 1155.568066       | 578.287671        | 11 |
| 9  | <b>970.484001</b>  | 485.745639        | 953.457452         | 477.232364        | 952.473436         | 476.740356        | E    | <b>1058.551688</b> | 529.779482      | 1041.525139 | 521.266208       | 1040.541123       | 520.774200        | 10 |
| 10 | <b>1117.552415</b> | 559.279846        | 1100.525866        | 550.766571        | 1099.541850        | 550.274563        | F    | <b>929.509095</b>  | 465.258186      | 912.482546  | 456.744911       | 911.498530        | 456.252903        | 9  |
| 11 | <b>1174.573879</b> | 587.790578        | 1157.547330        | 579.277303        | 1156.563314        | 578.785295        | G    | 782.440681         | 391.723979      | 765.414132  | 383.210704       | <b>764.430116</b> | 382.718696        | 8  |
| 12 | <b>1287.657943</b> | 644.332609        | 1270.631394        | 635.819335        | 1269.647378        | 635.327327        | L    | 725.419217         | 363.213247      | 708.392668  | 354.699972       | 707.408652        | 354.207964        | 7  |
| 13 | 1384.710707        | 692.858992        | 1367.684158        | 684.345717        | 1366.700142        | 683.853709        | P    | <b>612.335153</b>  | 306.671215      | 595.308604  | 298.157940       | 594.324588        | 297.665932        | 6  |
| 14 | <b>1512.769285</b> | <b>756.888281</b> | 1495.742736        | 748.375006        | 1494.758720        | 747.882998        | Q    | 515.282389         | 258.144833      | 498.255840  | 249.631558       | <b>497.271824</b> | 249.139550        | 5  |
| 15 | <b>1625.853349</b> | <b>813.430313</b> | <b>1608.826800</b> | <b>804.917038</b> | <b>1607.842784</b> | <b>804.425030</b> | I    | <b>387.223811</b>  | 194.115543      |             |                  | 369.213246        | 185.110261        | 4  |
| 16 | 1722.906113        | 861.956695        | 1705.879564        | 853.443420        | 1704.895548        | 852.951412        | P    | <b>274.139747</b>  | 137.573512      |             |                  | 256.129182        | 128.568229        | 3  |
| 17 | 1793.943227        | <b>897.475252</b> | 1776.916678        | 888.961977        | 1775.932662        | 888.469969        | A    | 177.086983         | 89.047130       |             |                  | 159.076418        | 80.041847         | 2  |
| 18 |                    |                   |                    |                   |                    |                   | S    | 106.049869         | 53.528573       |             |                  | 88.039304         | 44.523290         | 1  |

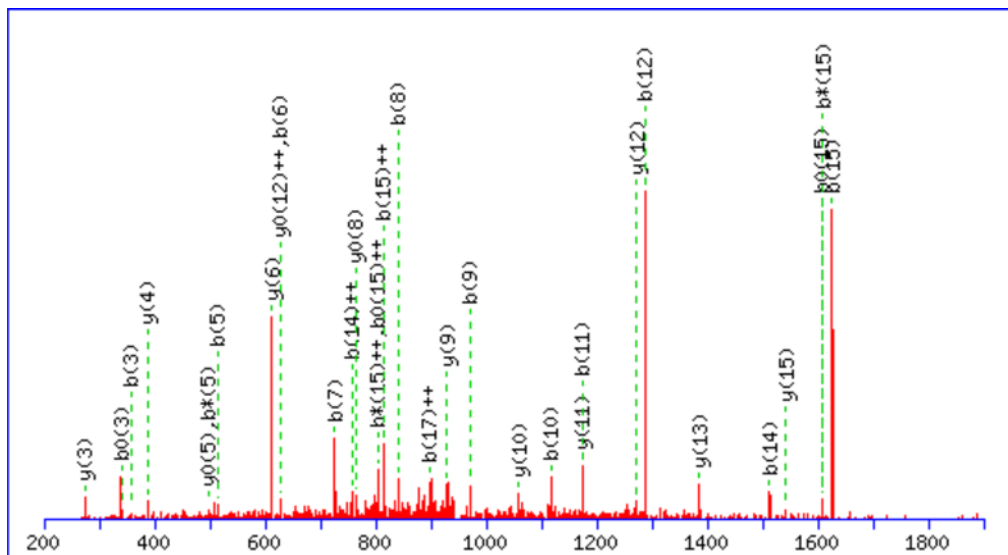

## Peptide View

MS/MS Fragmentation of **EIVLTQSPATLSLSPGER**

Found in **IPI00816799**, Tax\_Id=9606 Gene\_Symbol=- Rheumatoid factor D5 light chain (Fragment)

**Experiment:** 48 - PyA-3 **Fraction:** PyA-3

Match to Query 15273: 1897.016448 from(949.515500,2+)

Title: OECHL100317\_01.17055.17055.2.dta

Data file \\Boromir\masse\Data LTQ-Orbitrap\Chrystelle Lacroix\Etude clinique sJPU\OECHL100317\_01.raw

**Monoisotopic mass of neutral peptide Mr(calc):** 1897.015640 **Fixed modifications:** Carbamidomethyl (C) (apply to specified residues or termini only) **Ions Score:** 72

**Expect:** 5.6e-006 **Matches :** 32/192 fragment ions using 60 most intense peaks ([help](#))

| # | b          | b <sup>++</sup> | b*         | b <sup>*++</sup> | b <sup>0</sup>    | b <sup>0++</sup> | Seq.     | y                  | y <sup>++</sup>   | y*                 | y <sup>*++</sup>  | y <sup>0</sup> | y <sup>0++</sup> | #         |
|---|------------|-----------------|------------|------------------|-------------------|------------------|----------|--------------------|-------------------|--------------------|-------------------|----------------|------------------|-----------|
| 1 | 130.049869 | 65.528572       |            |                  | 112.039304        | 56.523290        | <b>E</b> |                    |                   |                    |                   |                |                  | <b>18</b> |
| 2 | 243.133933 | 122.070605      |            |                  | 225.123368        | 113.065322       | <b>I</b> | 1768.980341        | 884.993808        | <b>1751.953792</b> | 876.480534        | 1750.969776    | 875.988526       | <b>17</b> |
| 3 | 342.202347 | 171.604812      |            |                  | <b>324.191782</b> | 162.599529       | <b>V</b> | 1655.896277        | <b>828.451776</b> | <b>1638.869728</b> | <b>819.938502</b> | 1637.885712    | 819.446494       | <b>16</b> |
| 4 | 455.286411 | 228.146844      |            |                  | 437.275846        | 219.141561       | <b>L</b> | <b>1556.827863</b> | <b>778.917569</b> | <b>1539.801314</b> | 770.404295        | 1538.817298    | 769.912287       | <b>15</b> |
| 5 | 556.334090 | 278.670683      |            |                  | 538.323525        | 269.665401       | <b>T</b> | <b>1443.743799</b> | 722.375537        | 1426.717250        | 713.862263        | 1425.733234    | 713.370255       | <b>14</b> |
| 6 | 684.392668 | 342.699972      | 667.366119 | 334.186698       | <b>666.382103</b> | 333.694690       | <b>Q</b> | <b>1342.696120</b> | 671.851698        | 1325.669571        | 663.338423        | 1324.685555    | 662.846415       | <b>13</b> |

|    |                    |            |                    |            |                    |                   |   |                    |            |                    |            |             |            |           |
|----|--------------------|------------|--------------------|------------|--------------------|-------------------|---|--------------------|------------|--------------------|------------|-------------|------------|-----------|
| 7  | <b>771.424696</b>  | 386.215986 | 754.398147         | 377.702712 | <b>753.414131</b>  | 377.210704        | S | <b>1214.637542</b> | 607.822409 | 1197.610993        | 599.309134 | 1196.626977 | 598.817126 | <b>12</b> |
| 8  | 868.477460         | 434.742368 | 851.450911         | 426.229094 | 850.466895         | 425.737086        | P | <b>1127.605514</b> | 564.306395 | 1110.578965        | 555.793120 | 1109.594949 | 555.301112 | <b>11</b> |
| 9  | 939.514574         | 470.260925 | 922.488025         | 461.747651 | 921.504009         | 461.255643        | A | 1030.552750        | 515.780013 | <b>1013.526201</b> | 507.266738 | 1012.542185 | 506.774730 | <b>10</b> |
| 10 | <b>1040.562253</b> | 520.784765 | 1023.535704        | 512.271490 | 1022.551688        | <b>511.779482</b> | T | <b>959.515636</b>  | 480.261456 | 942.489087         | 471.748181 | 941.505071  | 471.256173 | <b>9</b>  |
| 11 | <b>1153.646317</b> | 577.326797 | 1136.619768        | 568.813522 | <b>1135.635752</b> | 568.321514        | L | <b>858.467957</b>  | 429.737616 | 841.441408         | 421.224342 | 840.457392  | 420.732334 | <b>8</b>  |
| 12 | <b>1240.678345</b> | 620.842811 | 1223.651796        | 612.329536 | 1222.667780        | 611.837528        | S | <b>745.383893</b>  | 373.195585 | 728.357344         | 364.682310 | 727.373328  | 364.190302 | <b>7</b>  |
| 13 | <b>1353.762409</b> | 677.384842 | 1336.735860        | 668.871568 | 1335.751844        | 668.379560        | L | <b>658.351865</b>  | 329.679570 | 641.325316         | 321.166296 | 640.341300  | 320.674288 | <b>6</b>  |
| 14 | <b>1440.794437</b> | 720.900857 | <b>1423.767888</b> | 712.387582 | 1422.783872        | 711.895574        | S | <b>545.267801</b>  | 273.137539 | 528.241252         | 264.624264 | 527.257236  | 264.132256 | <b>5</b>  |
| 15 | 1537.847201        | 769.427239 | 1520.820652        | 760.913964 | 1519.836636        | 760.421956        | P | <b>458.235773</b>  | 229.621524 | 441.209224         | 221.108250 | 440.225208  | 220.616242 | <b>4</b>  |
| 16 | 1594.868665        | 797.937971 | 1577.842116        | 789.424696 | 1576.858100        | 788.932688        | G | <b>361.183009</b>  | 181.095142 | 344.156460         | 172.581868 | 343.172444  | 172.089860 | <b>3</b>  |
| 17 | <b>1723.911258</b> | 862.459267 | 1706.884709        | 853.945992 | 1705.900693        | 853.453984        | E | 304.161545         | 152.584410 | 287.134996         | 144.071136 | 286.150980  | 143.579128 | <b>2</b>  |
| 18 |                    |            |                    |            |                    |                   | R | 175.118952         | 88.063114  | 158.092403         | 79.549839  |             |            | <b>1</b>  |

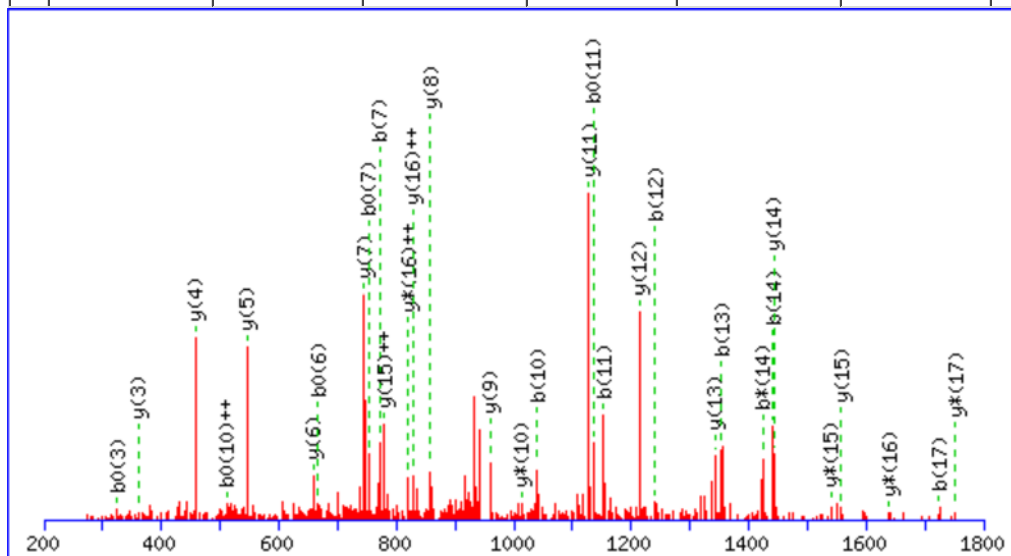

## Peptide View

MS/MS Fragmentation of **AVFVDLEPTVIDEVR**

Found in **IP100166768**, Tax\_Id=9606 Gene\_Symbol=TUBA1C TUBA1C protein

Experiment: 48 - PyA-3 Fraction: PyA-3

Match to Query 13668: 1700.900448 from(851.457500,2+)

Title: OECHL100317\_01.20605.20605.2.dta

Data file \\Boromir\masse\Data LTQ-Orbitrap\Chrystelle Lacroix\Etude clinique sJPU\OECHL100317\_01.raw

**Monoisotopic mass of neutral peptide Mr(calc):** 1700.898514**Fixed modifications:** Carbamidomethyl (C) (apply to specified residues or termini only)**Ions Score:** 55**Expect:** 0.00041**Matches :** 12/128 fragment ions using 15 most intense peaks ([help](#))

| #  | b                  | b <sup>++</sup> | b <sup>0</sup> | b <sup>0++</sup> | Seq. | y                  | y <sup>++</sup> | y <sup>*</sup> | y <sup>*++</sup> | y <sup>0</sup> | y <sup>0++</sup> | #  |
|----|--------------------|-----------------|----------------|------------------|------|--------------------|-----------------|----------------|------------------|----------------|------------------|----|
| 1  | 72.044390          | 36.525833       |                |                  | A    |                    |                 |                |                  |                |                  | 15 |
| 2  | 171.112804         | 86.060040       |                |                  | V    | 1630.868665        | 815.937971      | 1613.842116    | 807.424696       | 1612.858100    | 806.932688       | 14 |
| 3  | <b>318.181218</b>  | 159.594247      |                |                  | F    | 1531.800251        | 766.403764      | 1514.773702    | 757.890489       | 1513.789686    | 757.398481       | 13 |
| 4  | <b>417.249632</b>  | 209.128454      |                |                  | V    | <b>1384.731837</b> | 692.869557      | 1367.705288    | 684.356282       | 1366.721272    | 683.864274       | 12 |
| 5  | 532.276575         | 266.641926      | 514.266010     | 257.636643       | D    | <b>1285.663423</b> | 643.335350      | 1268.636874    | 634.822075       | 1267.652858    | 634.330067       | 11 |
| 6  | <b>645.360639</b>  | 323.183958      | 627.350074     | 314.178675       | L    | <b>1170.636480</b> | 585.821878      | 1153.609931    | 577.308604       | 1152.625915    | 576.816596       | 10 |
| 7  | <b>774.403232</b>  | 387.705254      | 756.392667     | 378.699972       | E    | <b>1057.552416</b> | 529.279846      | 1040.525867    | 520.766572       | 1039.541851    | 520.274564       | 9  |
| 8  | 871.455996         | 436.231636      | 853.445431     | 427.226354       | P    | <b>928.509823</b>  | 464.758550      | 911.483274     | 456.245275       | 910.499258     | 455.753267       | 8  |
| 9  | 972.503675         | 486.755476      | 954.493110     | 477.750193       | T    | 831.457059         | 416.232168      | 814.430510     | 407.718893       | 813.446494     | 407.226885       | 7  |
| 10 | 1071.572089        | 536.289683      | 1053.561524    | 527.284400       | V    | 730.409380         | 365.708328      | 713.382831     | 357.195054       | 712.398815     | 356.703046       | 6  |
| 11 | 1184.656153        | 592.831715      | 1166.645588    | 583.826432       | I    | <b>631.340966</b>  | 316.174121      | 614.314417     | 307.660846       | 613.330401     | 307.168838       | 5  |
| 12 | 1299.683096        | 650.345186      | 1281.672531    | 641.339904       | D    | <b>518.256902</b>  | 259.632089      | 501.230353     | 251.118815       | 500.246337     | 250.626807       | 4  |
| 13 | 1428.725689        | 714.866483      | 1410.715124    | 705.861200       | E    | 403.229959         | 202.118617      | 386.203410     | 193.605343       | 385.219394     | 193.113335       | 3  |
| 14 | <b>1527.794103</b> | 764.400690      | 1509.783538    | 755.395407       | V    | 274.187366         | 137.597321      | 257.160817     | 129.084047       |                |                  | 2  |
| 15 |                    |                 |                |                  | R    | 175.118952         | 88.063114       | 158.092403     | 79.549839        |                |                  | 1  |

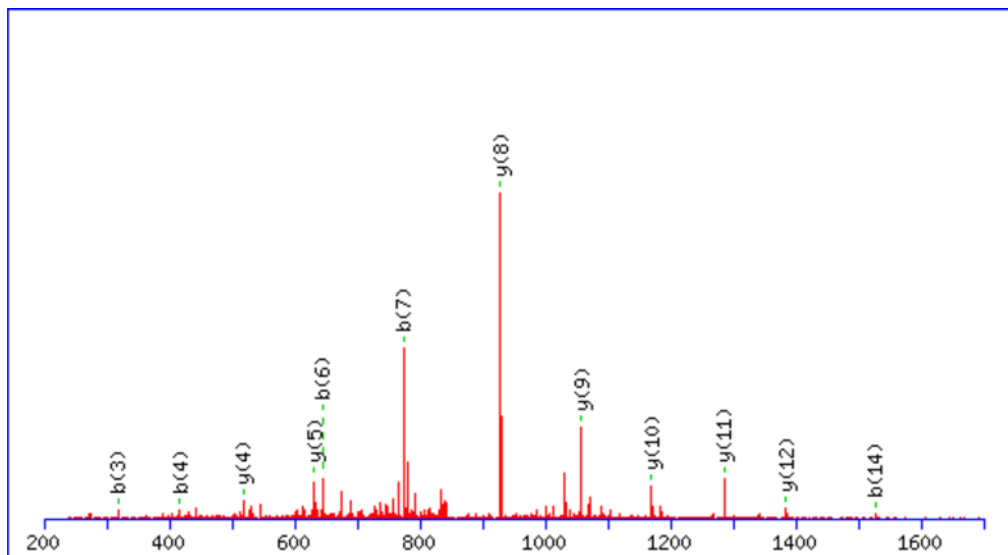

## Peptide View

### MS/MS Fragmentation of **LVQELCSLK**

Found in **IPI00018275**, Tax\_Id=9606 Gene\_Symbol=PRND Prion-like protein doppel

**Experiment:** 48 - PyA-3 **Fraction:** PyA-3

Match to Query 5710: 1088.589248 from(545.301900,2+)

Title: OECHL100317\_01.12065.12065.2.dta

Data file \\Boromir\masse\Data LTQ-Orbitrap\Chrystelle Lacroix\Etude clinique sJPU\OECHL100317\_01.raw

**Monoisotopic mass of neutral peptide Mr(calc):** 1088.589966 **Fixed modifications:** Carbamidomethyl (C) (apply to specified residues or termini only) **Ions Score:** 58

**Expect:** 0.00012 **Matches :** 18/82 fragment ions using 27 most intense peaks ([help](#))

| # | <b>b</b>          | <b>b<sup>++</sup></b> | <b>b*</b>  | <b>b<sup>*++</sup></b> | <b>b<sup>0</sup></b> | <b>b<sup>0++</sup></b> | Seq.     | <b>y</b>          | <b>y<sup>++</sup></b> | <b>y*</b>         | <b>y<sup>*++</sup></b> | <b>y<sup>0</sup></b> | <b>y<sup>0++</sup></b> | #        |
|---|-------------------|-----------------------|------------|------------------------|----------------------|------------------------|----------|-------------------|-----------------------|-------------------|------------------------|----------------------|------------------------|----------|
| 1 | 114.091340        | 57.549308             |            |                        |                      |                        | <b>L</b> |                   |                       |                   |                        |                      |                        | <b>9</b> |
| 2 | <b>213.159754</b> | 107.083515            |            |                        |                      |                        | <b>V</b> | <b>976.513194</b> | 488.760235            | 959.486645        | 480.246961             | 958.502629           | 479.754953             | <b>8</b> |
| 3 | <b>341.218332</b> | 171.112804            | 324.191783 | 162.599529             |                      |                        | <b>Q</b> | <b>877.444780</b> | <b>439.226028</b>     | <b>860.418231</b> | <b>430.712754</b>      | 859.434215           | <b>430.220746</b>      | <b>7</b> |
| 4 | <b>470.260925</b> | 235.634100            | 453.234376 | 227.120826             | 452.250360           | 226.628818             | <b>E</b> | <b>749.386202</b> | 375.196739            | 732.359653        | 366.683465             | 731.375637           | 366.191457             | <b>6</b> |
| 5 | <b>583.344989</b> | 292.176133            | 566.318440 | 283.662858             | 565.334424           | 283.170850             | <b>L</b> | <b>620.343609</b> | 310.675443            | 603.317060        | 302.162168             | 602.333044           | 301.670160             | <b>5</b> |
| 6 | <b>743.375638</b> | 372.191457            | 726.349089 | 363.678183             | 725.365073           | 363.186175             | <b>C</b> | <b>507.259545</b> | 254.133410            | 490.232996        | 245.620136             | 489.248980           | 245.128128             | <b>4</b> |



|   |                   |            |            |            |            |            |   |                   |            |            |            |            |            |   |
|---|-------------------|------------|------------|------------|------------|------------|---|-------------------|------------|------------|------------|------------|------------|---|
| 7 | <b>830.407666</b> | 415.707471 | 813.381117 | 407.194197 | 812.397101 | 406.702189 | S | <b>347.228896</b> | 174.118086 | 330.202347 | 165.604811 | 329.218331 | 165.112803 | 3 |
| 8 | <b>943.491730</b> | 472.249503 | 926.465181 | 463.736229 | 925.481165 | 463.244221 | L | <b>260.196868</b> | 130.602072 | 243.170319 | 122.088797 |            |            | 2 |
| 9 |                   |            |            |            |            |            | K | 147.112804        | 74.060040  | 130.086255 | 65.546765  |            |            | 1 |

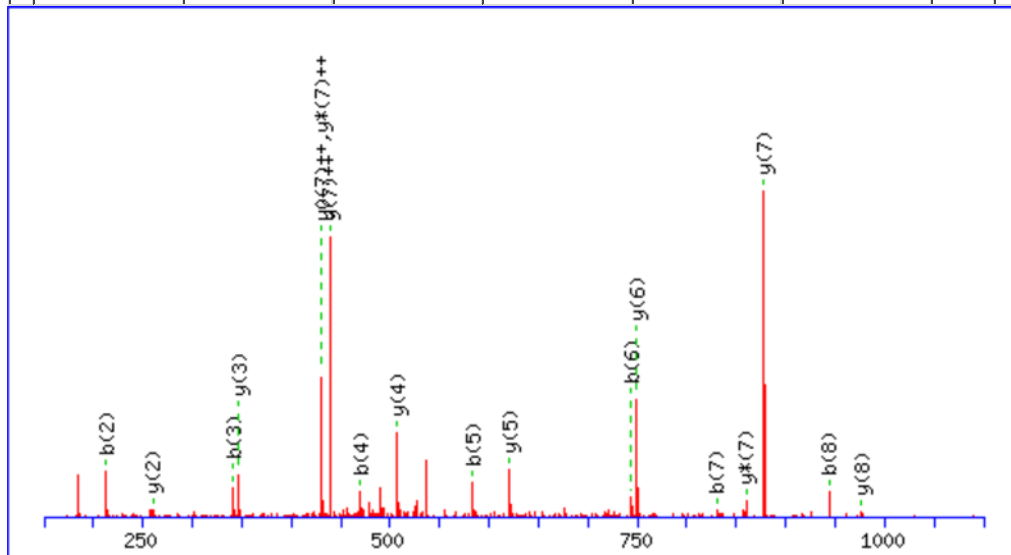

## Peptide View

MS/MS Fragmentation of **HSFKGEECPAGSHR**

Found in **IP100021970**, Tax\_Id=9606 Gene\_Symbol=MGC31957;TNFRSF10C TNFRSF10C protein

**Experiment:** 48 - PyA-3 **Fraction:** PyA-3

Match to Query 12300: 1597.706848 from(799.860700,2+)

Title: OECHL100317\_01.2380.2380.2.dta

Data file \\Boromir\masse\Data LTQ-Orbitrap\Chrystelle Lacroix\Etude clinique sJPU\OECHL100317\_01.raw

**Monoisotopic mass of neutral peptide Mr(calc):** 1597.705566 **Fixed modifications:** Carbamidomethyl (C) (apply to specified residues or termini only) **Ions Score:** 61

**Expect:** 4.4e-005 **Matches :** 32/144 fragment ions using 54 most intense peaks ([help](#))

| # | b                 | b <sup>++</sup> | b* | b <sup>*++</sup> | b <sup>0</sup>    | b <sup>0++</sup> | Seq. | y                  | y <sup>++</sup>   | y*          | y <sup>*++</sup>  | y <sup>0</sup>     | y <sup>0++</sup> | #  |
|---|-------------------|-----------------|----|------------------|-------------------|------------------|------|--------------------|-------------------|-------------|-------------------|--------------------|------------------|----|
| 1 | 138.066188        | 69.536732       |    |                  |                   |                  | H    |                    |                   |             |                   |                    |                  | 14 |
| 2 | <b>225.098216</b> | 113.052746      |    |                  | 207.087651        | 104.047463       | S    | <b>1461.653938</b> | <b>731.330607</b> | 1444.627389 | <b>722.817333</b> | <b>1443.643373</b> | 722.325325       | 13 |
| 3 | <b>372.166630</b> | 186.586953      |    |                  | <b>354.156065</b> | 177.581671       | F    | <b>1374.621910</b> | <b>687.814593</b> | 1357.595361 | 679.301319        | 1356.611345        | 678.809311       | 12 |

|    |                    |            |                   |                   |                    |                   |          |                    |                   |             |            |             |            |           |
|----|--------------------|------------|-------------------|-------------------|--------------------|-------------------|----------|--------------------|-------------------|-------------|------------|-------------|------------|-----------|
| 4  | <b>500.261593</b>  | 250.634435 | 483.235044        | 242.121160        | <b>482.251028</b>  | 241.629152        | <b>K</b> | <b>1227.553496</b> | <b>614.280386</b> | 1210.526947 | 605.767112 | 1209.542931 | 605.275104 | <b>11</b> |
| 5  | 557.283057         | 279.145167 | <b>540.256508</b> | 270.631892        | <b>539.272492</b>  | 270.139884        | <b>G</b> | <b>1099.458533</b> | 550.232905        | 1082.431984 | 541.719630 | 1081.447968 | 541.227622 | <b>10</b> |
| 6  | <b>686.325650</b>  | 343.666463 | 669.299101        | 335.153189        | 668.315085         | 334.661181        | <b>E</b> | 1042.437069        | 521.722173        | 1025.410520 | 513.208898 | 1024.426504 | 512.716890 | <b>9</b>  |
| 7  | 815.368243         | 408.187760 | 798.341694        | <b>399.674485</b> | 797.357678         | <b>399.182477</b> | <b>E</b> | <b>913.394476</b>  | 457.200876        | 896.367927  | 448.687602 | 895.383911  | 448.195594 | <b>8</b>  |
| 8  | <b>975.398892</b>  | 488.203084 | 958.372343        | 479.689810        | 957.388327         | 479.197802        | <b>C</b> | <b>784.351883</b>  | 392.679580        | 767.325334  | 384.166305 | 766.341318  | 383.674297 | <b>7</b>  |
| 9  | 1072.451656        | 536.729466 | 1055.425107       | 528.216192        | 1054.441091        | 527.724184        | <b>P</b> | <b>624.321234</b>  | <b>312.664255</b> | 607.294685  | 304.150981 | 606.310669  | 303.658973 | <b>6</b>  |
| 10 | <b>1143.488770</b> | 572.248023 | 1126.462221       | 563.734749        | 1125.478205        | 563.242741        | <b>A</b> | 527.268470         | 264.137873        | 510.241921  | 255.624598 | 509.257905  | 255.132590 | <b>5</b>  |
| 11 | <b>1200.510234</b> | 600.758755 | 1183.483685       | 592.245481        | 1182.499669        | 591.753473        | <b>G</b> | <b>456.231356</b>  | 228.619316        | 439.204807  | 220.106041 | 438.220791  | 219.614033 | <b>4</b>  |
| 12 | <b>1287.542262</b> | 644.274769 | 1270.515713       | 635.761495        | 1269.531697        | 635.269487        | <b>S</b> | <b>399.209892</b>  | 200.108584        | 382.183343  | 191.595309 | 381.199327  | 191.103301 | <b>3</b>  |
| 13 | <b>1424.601174</b> | 712.804225 | 1407.574625       | 704.290951        | <b>1406.590609</b> | 703.798943        | <b>H</b> | <b>312.177864</b>  | 156.592570        | 295.151315  | 148.079295 |             |            | <b>2</b>  |
| 14 |                    |            |                   |                   |                    |                   | <b>R</b> | 175.118952         | 88.063114         | 158.092403  | 79.549839  |             |            | <b>1</b>  |

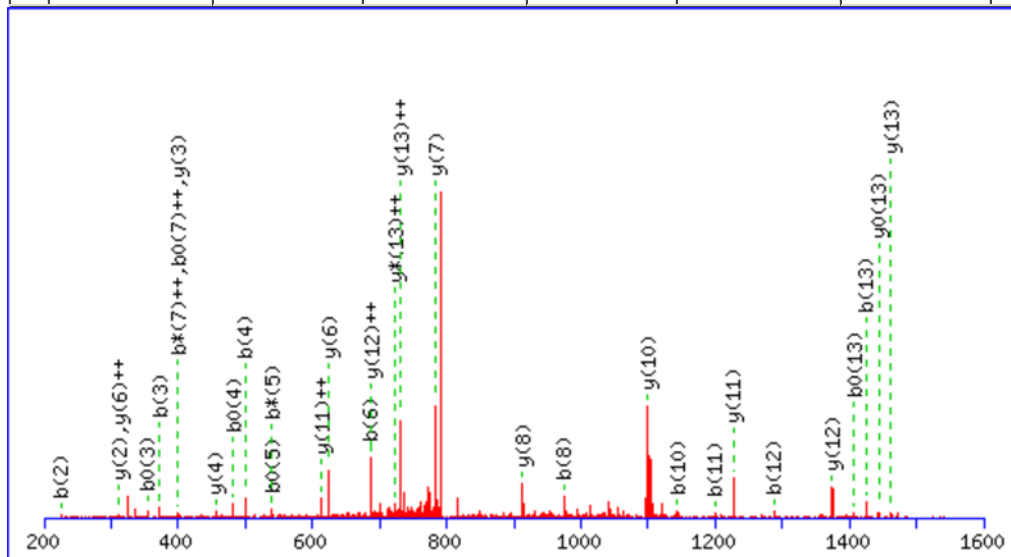

## Peptide View

MS/MS Fragmentation of **VTATGFQQCSLIDGR**

Found in **IP100333140**, Tax\_Id=9606 Gene\_Symbol=DNER Delta and Notch-like epidermal growth factor-related receptor

Experiment: 48 - PyA-3 Fraction: PyA-3

Match to Query 13090: 1651.802048 from(826.908300,2+)

Title: OECHL100317\_01.14147.14147.2.dta

Data file \\Boromir\masse\Data LTQ-Orbitrap\Chrystelle Lacroix\Etude clinique sJPU\OECHL100317\_01.raw

**Monoisotopic mass of neutral peptide Mr(calc):** 1651.798828**Fixed modifications:** Carbamidomethyl (C) (apply to specified residues or termini only)**Ions Score:** 78**Expect:** 2.2e-006**Matches :** 39/150 fragment ions using 84 most intense peaks ([help](#))

| #  | b           | b <sup>++</sup> | b*          | b <sup>+++</sup> | b <sup>0</sup> | b <sup>0++</sup> | Seq. | y           | y <sup>++</sup> | y*          | y <sup>+++</sup> | y <sup>0</sup> | y <sup>0++</sup> | #  |
|----|-------------|-----------------|-------------|------------------|----------------|------------------|------|-------------|-----------------|-------------|------------------|----------------|------------------|----|
| 1  | 100.075690  | 50.541483       |             |                  |                |                  | V    |             |                 |             |                  |                |                  | 15 |
| 2  | 201.123369  | 101.065322      |             |                  | 183.112804     | 92.060040        | T    | 1553.737670 | 777.372473      | 1536.711121 | 768.859198       | 1535.727105    | 768.367190       | 14 |
| 3  | 272.160483  | 136.583879      |             |                  | 254.149918     | 127.578597       | A    | 1452.689991 | 726.848633      | 1435.663442 | 718.335359       | 1434.679426    | 717.843351       | 13 |
| 4  | 373.208162  | 187.107719      |             |                  | 355.197597     | 178.102437       | T    | 1381.652877 | 691.330076      | 1364.626328 | 682.816802       | 1363.642312    | 682.324794       | 12 |
| 5  | 430.229626  | 215.618451      |             |                  | 412.219061     | 206.613169       | G    | 1280.605198 | 640.806237      | 1263.578649 | 632.292962       | 1262.594633    | 631.800954       | 11 |
| 6  | 577.298040  | 289.152658      |             |                  | 559.287475     | 280.147376       | F    | 1223.583734 | 612.295505      | 1206.557185 | 603.782230       | 1205.573169    | 603.290222       | 10 |
| 7  | 705.356618  | 353.181947      | 688.330069  | 344.668673       | 687.346053     | 344.176665       | Q    | 1076.515320 | 538.761298      | 1059.488771 | 530.248023       | 1058.504755    | 529.756015       | 9  |
| 8  | 833.415196  | 417.211236      | 816.388647  | 408.697962       | 815.404631     | 408.205954       | Q    | 948.456742  | 474.732009      | 931.430193  | 466.218734       | 930.446177     | 465.726726       | 8  |
| 9  | 993.445845  | 497.226561      | 976.419296  | 488.713286       | 975.435280     | 488.221278       | C    | 820.398164  | 410.702720      | 803.371615  | 402.189445       | 802.387599     | 401.697437       | 7  |
| 10 | 1080.477873 | 540.742575      | 1063.451324 | 532.229300       | 1062.467308    | 531.737292       | S    | 660.367515  | 330.687395      | 643.340966  | 322.174121       | 642.356950     | 321.682113       | 6  |
| 11 | 1193.561937 | 597.284607      | 1176.535388 | 588.771332       | 1175.551372    | 588.279324       | L    | 573.335487  | 287.171381      | 556.308938  | 278.658107       | 555.324922     | 278.166099       | 5  |
| 12 | 1306.646001 | 653.826638      | 1289.619452 | 645.313364       | 1288.635436    | 644.821356       | I    | 460.251423  | 230.629349      | 443.224874  | 222.116075       | 442.240858     | 221.624067       | 4  |
| 13 | 1421.672944 | 711.340110      | 1404.646395 | 702.826836       | 1403.662379    | 702.334827       | D    | 347.167359  | 174.087317      | 330.140810  | 165.574043       | 329.156794     | 165.082035       | 3  |
| 14 | 1478.694408 | 739.850842      | 1461.667859 | 731.337567       | 1460.683843    | 730.845559       | G    | 232.140416  | 116.573846      | 215.113867  | 108.060571       |                |                  | 2  |
| 15 |             |                 |             |                  |                |                  | R    | 175.118952  | 88.063114       | 158.092403  | 79.549839        |                |                  | 1  |

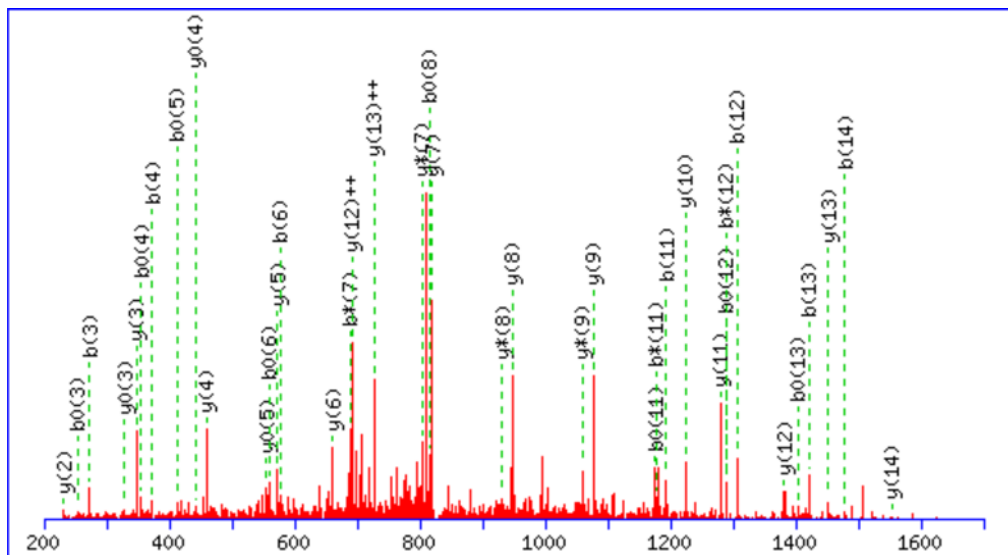

## Peptide View

MS/MS Fragmentation of **YSGSEGSTQTLTKGELK**

Found in **IP100017526**, Tax\_Id=9606 Gene\_Symbol=S100P Protein S100-P

**Experiment:** 48 - PyA-3 **Fraction:** PyA-3

Match to Query 14451: 1784.881048 from(893.447800,2+)

Title: OECHL100317\_01.7949.7949.2.dta

Data file \\Boromir\masse\Data LTQ-Orbitrap\Chrystelle Lacroix\Etude clinique sJPU\OECHL100317\_01.raw

**Monoisotopic mass of neutral peptide Mr(calc):** 1784.879211 **Fixed modifications:** Carbamidomethyl (C) (apply to specified residues or termini only) **Ions Score:** 58

**Expect:** 0.00025 **Matches :** 17/170 fragment ions using 30 most intense peaks ([help](#))

| # | b          | b <sup>++</sup> | b* | b <sup>*++</sup> | b <sup>0</sup>    | b <sup>0++</sup> | Seq.     | y                  | y <sup>++</sup>   | y*          | y <sup>*++</sup> | y <sup>0</sup> | y <sup>0++</sup> | #  |
|---|------------|-----------------|----|------------------|-------------------|------------------|----------|--------------------|-------------------|-------------|------------------|----------------|------------------|----|
| 1 | 164.070605 | 82.538940       |    |                  |                   |                  | <b>Y</b> |                    |                   |             |                  |                |                  | 17 |
| 2 | 251.102633 | 126.054954      |    |                  | 233.092068        | 117.049672       | <b>S</b> | 1622.823172        | 811.915224        | 1605.796623 | 803.401950       | 1604.812607    | 802.909941       | 16 |
| 3 | 308.124097 | 154.565687      |    |                  | 290.113532        | 145.560404       | <b>G</b> | 1535.791144        | <b>768.399210</b> | 1518.764595 | 759.885936       | 1517.780579    | 759.393928       | 15 |
| 4 | 395.156125 | 198.081701      |    |                  | 377.145560        | 189.076418       | <b>S</b> | 1478.769680        | <b>739.888478</b> | 1461.743131 | 731.375204       | 1460.759115    | 730.883195       | 14 |
| 5 | 524.198718 | 262.602997      |    |                  | <b>506.188153</b> | 253.597715       | <b>E</b> | <b>1391.737652</b> | 696.372464        | 1374.711103 | 687.859190       | 1373.727087    | 687.367182       | 13 |
| 6 | 581.220182 | 291.113729      |    |                  | 563.209617        | 282.108447       | <b>G</b> | <b>1262.695059</b> | <b>631.851167</b> | 1245.668510 | 623.337893       | 1244.684494    | 622.845885       | 12 |

|    |                    |            |             |            |                    |                   |          |                    |            |             |            |             |            |           |
|----|--------------------|------------|-------------|------------|--------------------|-------------------|----------|--------------------|------------|-------------|------------|-------------|------------|-----------|
| 7  | 668.252210         | 334.629743 |             |            | 650.241645         | <b>325.624461</b> | <b>S</b> | <b>1205.673595</b> | 603.340436 | 1188.647046 | 594.827161 | 1187.663030 | 594.335153 | <b>11</b> |
| 8  | 769.299889         | 385.153583 |             |            | 751.289324         | 376.148300        | <b>T</b> | <b>1118.641567</b> | 559.824421 | 1101.615018 | 551.311147 | 1100.631002 | 550.819139 | <b>10</b> |
| 9  | 897.358467         | 449.182872 | 880.331918  | 440.669597 | 879.347902         | 440.177589        | <b>Q</b> | <b>1017.593888</b> | 509.300582 | 1000.567339 | 500.787307 | 999.583323  | 500.295299 | <b>9</b>  |
| 10 | 998.406146         | 499.706711 | 981.379597  | 491.193437 | 980.395581         | 490.701429        | <b>T</b> | 889.535310         | 445.271293 | 872.508761  | 436.758018 | 871.524745  | 436.266010 | <b>8</b>  |
| 11 | 1111.490210        | 556.248743 | 1094.463661 | 547.735469 | <b>1093.479645</b> | 547.243461        | <b>L</b> | 788.487631         | 394.747453 | 771.461082  | 386.234179 | 770.477066  | 385.742171 | <b>7</b>  |
| 12 | 1212.537889        | 606.772583 | 1195.511340 | 598.259308 | 1194.527324        | 597.767300        | <b>T</b> | <b>675.403567</b>  | 338.205421 | 658.377018  | 329.692147 | 657.393002  | 329.200139 | <b>6</b>  |
| 13 | 1340.632852        | 670.820064 | 1323.606303 | 662.306790 | 1322.622287        | 661.814782        | <b>K</b> | <b>574.355888</b>  | 287.681582 | 557.329339  | 279.168307 | 556.345323  | 278.676299 | <b>5</b>  |
| 14 | 1397.654316        | 699.330796 | 1380.627767 | 690.817522 | 1379.643751        | 690.325514        | <b>G</b> | <b>446.260925</b>  | 223.634100 | 429.234376  | 215.120826 | 428.250360  | 214.628818 | <b>4</b>  |
| 15 | <b>1526.696909</b> | 763.852093 | 1509.670360 | 755.338818 | 1508.686344        | 754.846810        | <b>E</b> | 389.239461         | 195.123368 | 372.212912  | 186.610094 | 371.228896  | 186.118086 | <b>3</b>  |
| 16 | <b>1639.780973</b> | 820.394124 | 1622.754424 | 811.880850 | 1621.770408        | 811.388842        | <b>L</b> | <b>260.196868</b>  | 130.602072 | 243.170319  | 122.088797 |             |            | <b>2</b>  |
| 17 |                    |            |             |            |                    |                   | <b>K</b> | 147.112804         | 74.060040  | 130.086255  | 65.546765  |             |            | <b>1</b>  |

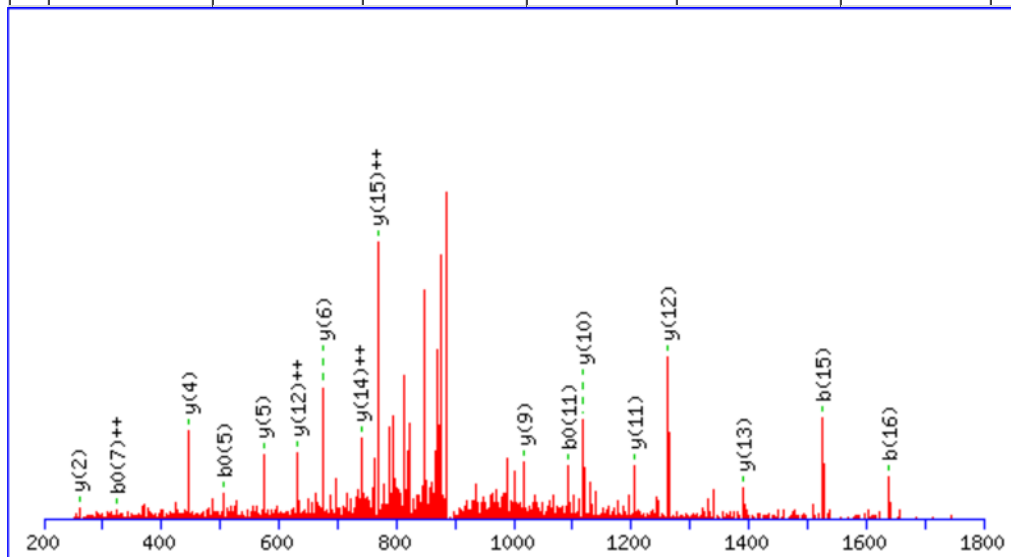

## Peptide View

MS/MS Fragmentation of **ESLDVYELDAK**

Found in **IPI00013698**, Tax\_Id=9606 Gene\_Symbol=ASAHI Isoform 1 of Acid ceramidase

Experiment: 48 - PyA-3 Fraction: PyA-3

Match to Query 8852: 1280.615848 from(641.315200,2+)

Title: OECHL100317\_01.14725.14725.2.dta

Data file \\Boromir\masse\Data LTQ-Orbitrap\Chrystelle Lacroix\Etude clinique sJPU\OECHL100317\_01.raw

**Monoisotopic mass of neutral peptide Mr(calc):** 1280.613586**Fixed modifications:** Carbamidomethyl (C) (apply to specified residues or termini only)**Ions Score:** 50**Expect:** 0.001**Matches :** 18/96 fragment ions using 33 most intense peaks ([help](#))

| #  | b           | b <sup>++</sup> | b <sup>0</sup> | b <sup>0++</sup> | Seq. | y           | y <sup>++</sup> | y*          | y <sup>*++</sup> | y <sup>0</sup> | y <sup>0++</sup> | #  |
|----|-------------|-----------------|----------------|------------------|------|-------------|-----------------|-------------|------------------|----------------|------------------|----|
| 1  | 130.049869  | 65.528572       | 112.039304     | 56.523290        | E    |             |                 |             |                  |                |                  | 11 |
| 2  | 217.081897  | 109.044586      | 199.071332     | 100.039304       | S    | 1152.578296 | 576.792786      | 1135.551747 | 568.279512       | 1134.567731    | 567.787504       | 10 |
| 3  | 330.165961  | 165.586618      | 312.155396     | 156.581336       | L    | 1065.546268 | 533.276772      | 1048.519719 | 524.763498       | 1047.535703    | 524.271490       | 9  |
| 4  | 445.192904  | 223.100090      | 427.182339     | 214.094808       | D    | 952.462204  | 476.734740      | 935.435655  | 468.221466       | 934.451639     | 467.729458       | 8  |
| 5  | 544.261318  | 272.634297      | 526.250753     | 263.629015       | V    | 837.435261  | 419.221269      | 820.408712  | 410.707994       | 819.424696     | 410.215986       | 7  |
| 6  | 707.324647  | 354.165962      | 689.314082     | 345.160679       | Y    | 738.366847  | 369.687062      | 721.340298  | 361.173787       | 720.356282     | 360.681779       | 6  |
| 7  | 836.367240  | 418.687258      | 818.356675     | 409.681976       | E    | 575.303518  | 288.155397      | 558.276969  | 279.642123       | 557.292953     | 279.150115       | 5  |
| 8  | 949.451304  | 475.229290      | 931.440739     | 466.224008       | L    | 446.260925  | 223.634101      | 429.234376  | 215.120826       | 428.250360     | 214.628818       | 4  |
| 9  | 1064.478247 | 532.742762      | 1046.467682    | 523.737479       | D    | 333.176861  | 167.092069      | 316.150312  | 158.578794       | 315.166296     | 158.086786       | 3  |
| 10 | 1135.515361 | 568.261319      | 1117.504796    | 559.256036       | A    | 218.149918  | 109.578597      | 201.123369  | 101.065322       |                |                  | 2  |
| 11 |             |                 |                |                  | K    | 147.112804  | 74.060040       | 130.086255  | 65.546765        |                |                  | 1  |

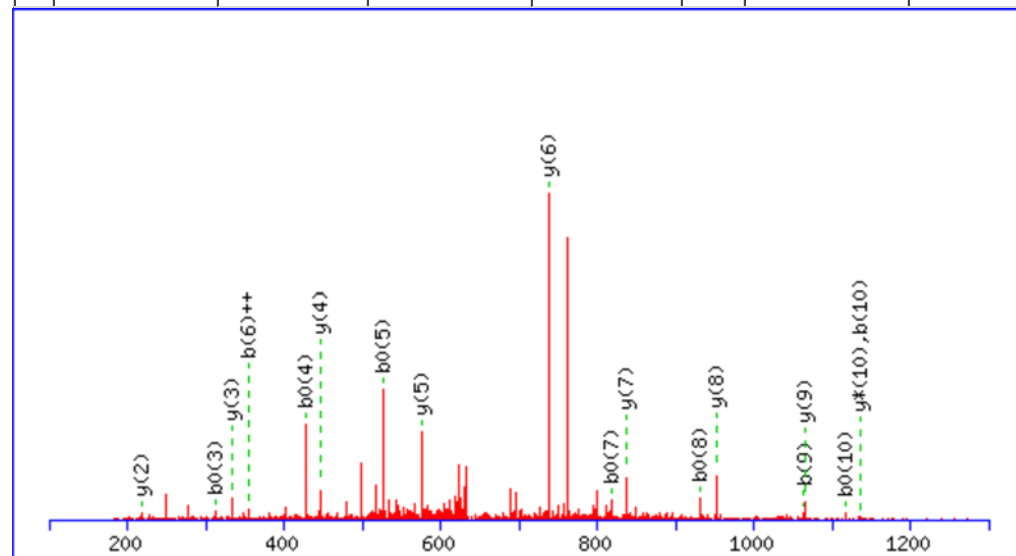

## Peptide View

MS/MS Fragmentation of **NPVLQQDAHSSVTITPQR**

Found in **IPI00410488**, Tax\_Id=9606 Gene\_Symbol=CD276 Isoform 1 of CD276 antigen

Experiment: 06 - S\_B-4 Fraction: S\_B-4

Match to Query 14203: 1990.025648 from(996.020100,2+)

Title: OECHL100317\_41.10310.10310.2.dta

Data file \\Boromir\masse\Data LTQ-Orbitrap\Chrystelle Lacroix\Etude clinique sJPU\OECHL100317\_41.raw

**Monoisotopic mass of neutral peptide Mr(calc):** 1990.023209**Fixed modifications:** Carbamidomethyl (C) (apply to specified residues or termini only)**Ions**

**Score:** 86 **Expect:** 3.6e-007**Matches :** 47/186 fragment ions using 81 most intense peaks ([help](#))

| #  | b                  | b <sup>++</sup>   | b*                 | b <sup>*++</sup>  | b <sup>0</sup>     | b <sup>0++</sup>  | Seq. | y                  | y <sup>++</sup>   | y*                | y <sup>*++</sup>  | y <sup>0</sup> | y <sup>0++</sup> |
|----|--------------------|-------------------|--------------------|-------------------|--------------------|-------------------|------|--------------------|-------------------|-------------------|-------------------|----------------|------------------|
| 1  | 115.050203         | 58.028740         | 98.023654          | 49.515465         |                    |                   | N    |                    |                   |                   |                   |                |                  |
| 2  | 212.102967         | 106.555121        | 195.076418         | 98.041847         |                    |                   | P    | 1876.987553        | 938.997415        | 1859.961004       | 930.484140        | 1858.976988    | 929.9921         |
| 3  | <b>311.171381</b>  | 156.089328        | <b>294.144832</b>  | 147.576054        |                    |                   | V    | <b>1779.934789</b> | <b>890.471033</b> | 1762.908240       | <b>881.957758</b> | 1761.924224    | <b>881.4657</b>  |
| 4  | 424.255445         | 212.631361        | <b>407.228896</b>  | 204.118086        |                    |                   | L    | <b>1680.866375</b> | <b>840.936826</b> | 1663.839826       | 832.423551        | 1662.855810    | 831.9315         |
| 5  | <b>552.314023</b>  | 276.660650        | <b>535.287474</b>  | 268.147375        |                    |                   | Q    | <b>1567.782311</b> | <b>784.394794</b> | 1550.755762       | <b>775.881519</b> | 1549.771746    | <b>775.3895</b>  |
| 6  | <b>680.372601</b>  | 340.689939        | 663.346052         | 332.176664        |                    |                   | Q    | <b>1439.723733</b> | 720.365505        | 1422.697184       | 711.852230        | 1421.713168    | 711.3602         |
| 7  | <b>795.399544</b>  | 398.203410        | 778.372995         | 389.690136        | 777.388979         | 389.198128        | D    | <b>1311.665155</b> | 656.336215        | 1294.638606       | 647.822941        | 1293.654590    | 647.3309         |
| 8  | 866.436658         | 433.721967        | 849.410109         | 425.208693        | 848.426093         | 424.716685        | A    | <b>1196.638212</b> | 598.822744        | 1179.611663       | 590.309470        | 1178.627647    | 589.8174         |
| 9  | <b>1003.495570</b> | <b>502.251423</b> | <b>986.469021</b>  | 493.738149        | 985.485005         | 493.246141        | H    | <b>1125.601098</b> | 563.304187        | 1108.574549       | 554.790913        | 1107.590533    | 554.2989         |
| 10 | <b>1090.527598</b> | 545.767437        | 1073.501049        | 537.254163        | 1072.517033        | 536.762155        | S    | <b>988.542186</b>  | 494.774731        | 971.515637        | 486.261457        | 970.531621     | <b>485.7694</b>  |
| 11 | 1177.559626        | 589.283451        | 1160.533077        | 580.770177        | 1159.549061        | 580.278169        | S    | <b>901.510158</b>  | 451.258717        | 884.483609        | 442.745443        | 883.499593     | 442.2534         |
| 12 | <b>1276.628040</b> | 638.817658        | 1259.601491        | 630.304384        | <b>1258.617475</b> | 629.812376        | V    | <b>814.478130</b>  | <b>407.742703</b> | 797.451581        | 399.229428        | 796.467565     | 398.7374         |
| 13 | <b>1377.675719</b> | 689.341498        | 1360.649170        | <b>680.828223</b> | 1359.665154        | <b>680.336215</b> | T    | <b>715.409716</b>  | 358.208496        | 698.383167        | 349.695221        | 697.399151     | 349.2032         |
| 14 | <b>1490.759783</b> | 745.883530        | <b>1473.733234</b> | 737.370255        | <b>1472.749218</b> | 736.878247        | I    | <b>614.362037</b>  | 307.684656        | 597.335488        | 299.171382        | 596.351472     | 298.6793         |
| 15 | <b>1591.807462</b> | 796.407369        | 1574.780913        | 787.894095        | <b>1573.796897</b> | 787.402087        | T    | <b>501.277973</b>  | 251.142624        | 484.251424        | 242.629350        | 483.267408     | 242.1373         |
| 16 | 1688.860226        | 844.933751        | 1671.833677        | 836.420477        | 1670.849661        | 835.928469        | P    | <b>400.230294</b>  | 200.618785        | <b>383.203745</b> | 192.105510        |                |                  |
| 17 | <b>1816.918804</b> | 908.963040        | 1799.892255        | 900.449766        | 1798.908239        | 899.957758        | Q    | 303.177530         | 152.092403        | 286.150981        | 143.579128        |                |                  |
| 18 |                    |                   |                    |                   |                    |                   | R    | 175.118952         | 88.063114         | 158.092403        | 79.549839         |                |                  |

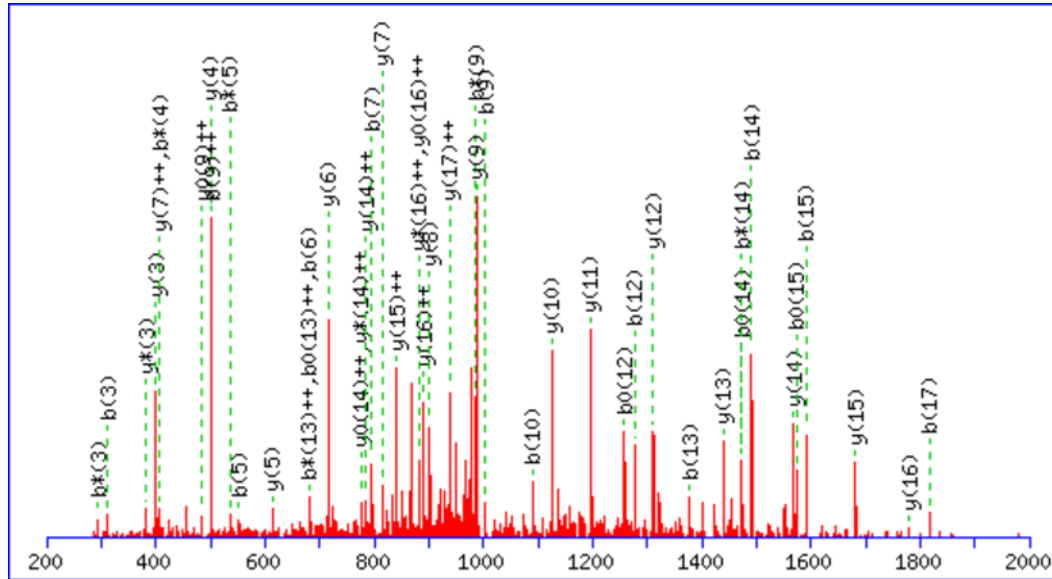

## Peptide View

MS/MS Fragmentation of **AVGLLTVISK**

Found in **IPI00013446**, Tax\_Id=9606 Gene\_Symbol=PSCA Prostate stem cell antigen

**Experiment:** 06 - S\_B-4 **Fraction:** S\_B-4

Match to Query 3258: 999.632848 from(500.823700,2+)

Title: OECHL100317\_41.16955.16955.2.dta

Data file \\Boromir\masse\Data LTQ-Orbitrap\Chrystelle Lacroix\Etude clinique sJPU\OECHL100317\_41.raw

**Monoisotopic mass of neutral peptide Mr(calc):** 999.632828 **Fixed modifications:** Carbamidomethyl (C) (apply to specified residues or termini only) **Ions Score:**

**65 Expect:** 4e-006 **Matches :** 15/78 fragment ions using 24 most intense peaks ([help](#))

| # | b                 | b <sup>++</sup>   | b <sup>0</sup> | b <sup>0++</sup> | Seq. | y                 | y <sup>++</sup> | y <sup>*</sup> | y <sup>*++</sup> | y <sup>0</sup> | y <sup>0++</sup> | #  |
|---|-------------------|-------------------|----------------|------------------|------|-------------------|-----------------|----------------|------------------|----------------|------------------|----|
| 1 | 72.044390         | 36.525833         |                |                  | A    |                   |                 |                |                  |                |                  | 10 |
| 2 | <b>171.112804</b> | 86.060040         |                |                  | V    | 929.602995        | 465.305136      | 912.576446     | 456.791861       | 911.592430     | 456.299853       | 9  |
| 3 | <b>228.134268</b> | 114.570772        |                |                  | G    | <b>830.534581</b> | 415.770929      | 813.508032     | 407.257654       | 812.524016     | 406.765646       | 8  |
| 4 | <b>341.218332</b> | <b>171.112804</b> |                |                  | L    | 773.513117        | 387.260197      | 756.486568     | 378.746922       | 755.502552     | 378.254914       | 7  |
| 5 | <b>454.302396</b> | <b>227.654836</b> |                |                  | L    | <b>660.429053</b> | 330.718165      | 643.402504     | 322.204890       | 642.418488     | 321.712882       | 6  |



|    |            |            |            |            |   |            |            |            |            |            |            |   |
|----|------------|------------|------------|------------|---|------------|------------|------------|------------|------------|------------|---|
| 6  | 555.350075 | 278.178676 | 537.339510 | 269.173393 | T | 547.344989 | 274.176133 | 530.318440 | 265.662858 | 529.334424 | 265.170850 | 5 |
| 7  | 654.418489 | 327.712883 | 636.407924 | 318.707600 | V | 446.297310 | 223.652293 | 429.270761 | 215.139018 | 428.286745 | 214.647010 | 4 |
| 8  | 767.502553 | 384.254915 | 749.491988 | 375.249632 | I | 347.228896 | 174.118086 | 330.202347 | 165.604811 | 329.218331 | 165.112803 | 3 |
| 9  | 854.534581 | 427.770929 | 836.524016 | 418.765646 | S | 234.144832 | 117.576054 | 217.118283 | 109.062779 | 216.134267 | 108.570771 | 2 |
| 10 |            |            |            |            | K | 147.112804 | 74.060040  | 130.086255 | 65.546765  |            |            | 1 |

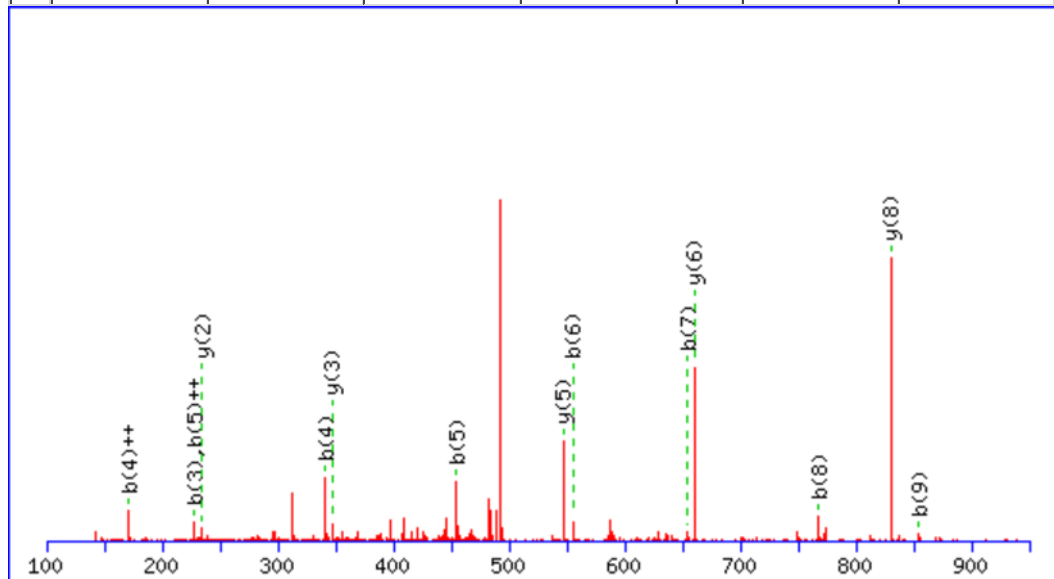

## Peptide View

MS/MS Fragmentation of **FGQSGPIVLDDVR**

Found in **IPI00418512**, Tax\_Id=9606 Gene\_Symbol=DMBT1 Isoform 4 of Deleted in malignant brain tumors 1 protein

Experiment: 06 - S\_B-4 Fraction: S\_B-4

Match to Query 9283: 1458.751248 from(730.382900,2+)

Title: OECHL100317\_41.15380.15380.2.dta

Data file \\Boromir\masse\Data LTQ-Orbitrap\Chrystelle Lacroix\Etude clinique sJPU\OECHL100317\_41.raw

**Monoisotopic mass of neutral peptide Mr(calc):** 1458.746719 **Fixed modifications:** Carbamidomethyl (C) (apply to specified residues or termini only) **Ions**

**Score:** 65 **Expect:** 4.8e-005 **Matches :** 28/140 fragment ions using 49 most intense peaks ([help](#))

| # | b | b <sup>++</sup> | b* | b <sup>+++</sup> | b <sup>0</sup> | b <sup>0++</sup> | Seq. | y | y <sup>++</sup> | y* | y <sup>+++</sup> | y <sup>0</sup> | y <sup>0++</sup> |
|---|---|-----------------|----|------------------|----------------|------------------|------|---|-----------------|----|------------------|----------------|------------------|
|---|---|-----------------|----|------------------|----------------|------------------|------|---|-----------------|----|------------------|----------------|------------------|

|    |                    |            |                   |            |                   |            |  |          |                    |                   |                   |                   |                    |                 |
|----|--------------------|------------|-------------------|------------|-------------------|------------|--|----------|--------------------|-------------------|-------------------|-------------------|--------------------|-----------------|
| 1  | 148.075690         | 74.541483  |                   |            |                   |            |  | <b>F</b> |                    |                   |                   |                   |                    |                 |
| 2  | 205.097154         | 103.052215 |                   |            |                   |            |  | <b>G</b> | <b>1312.685556</b> | <b>656.846416</b> | 1295.659007       | 648.333142        | 1294.674991        | 647.8411        |
| 3  | <b>333.155732</b>  | 167.081504 | 316.129183        | 158.568230 |                   |            |  | <b>Q</b> | 1255.664092        | <b>628.335684</b> | 1238.637543       | <b>619.822410</b> | <b>1237.653527</b> | <b>619.3304</b> |
| 4  | <b>390.177196</b>  | 195.592236 | 373.150647        | 187.078961 |                   |            |  | <b>G</b> | <b>1127.605514</b> | 564.306395        | 1110.578965       | 555.793121        | 1109.594949        | 555.3011        |
| 5  | 477.209224         | 239.108250 | 460.182675        | 230.594976 | <b>459.198659</b> | 230.102968 |  | <b>S</b> | <b>1070.584050</b> | 535.795663        | 1053.557501       | 527.282389        | 1052.573485        | 526.7903        |
| 6  | 534.230688         | 267.618982 | <b>517.204139</b> | 259.105708 | <b>516.220123</b> | 258.613700 |  | <b>G</b> | <b>983.552022</b>  | 492.279649        | 966.525473        | 483.766375        | 965.541457         | 483.2743        |
| 7  | 631.283452         | 316.145364 | 614.256903        | 307.632090 | 613.272887        | 307.140082 |  | <b>P</b> | <b>926.530558</b>  | 463.768917        | 909.504009        | 455.255643        | 908.519993         | 454.7636        |
| 8  | 744.367516         | 372.687396 | 727.340967        | 364.174122 | 726.356951        | 363.682114 |  | <b>I</b> | 829.477794         | 415.242535        | 812.451245        | 406.729261        | 811.467229         | 406.2372        |
| 9  | <b>843.435930</b>  | 422.221603 | <b>826.409381</b> | 413.708329 | <b>825.425365</b> | 413.216321 |  | <b>V</b> | <b>716.393730</b>  | 358.700503        | 699.367181        | 350.187229        | 698.383165         | 349.6952        |
| 10 | 956.519994         | 478.763635 | 939.493445        | 470.250361 | 938.509429        | 469.758353 |  | <b>L</b> | <b>617.325316</b>  | 309.166296        | 600.298767        | 300.653022        | <b>599.314751</b>  | 300.1610        |
| 11 | <b>1071.546937</b> | 536.277107 | 1054.520388       | 527.763832 | 1053.536372       | 527.271824 |  | <b>D</b> | <b>504.241252</b>  | 252.624264        | 487.214703        | 244.110990        | 486.230687         | 243.6189        |
| 12 | <b>1186.573880</b> | 593.790578 | 1169.547331       | 585.277304 | 1168.563315       | 584.785296 |  | <b>D</b> | <b>389.214309</b>  | 195.110793        | 372.187760        | 186.597518        | 371.203744         | 186.1055        |
| 13 | <b>1285.642294</b> | 643.324785 | 1268.615745       | 634.811511 | 1267.631729       | 634.319503 |  | <b>V</b> | <b>274.187366</b>  | 137.597321        | <b>257.160817</b> | 129.084047        |                    |                 |
| 14 |                    |            |                   |            |                   |            |  | <b>R</b> | 175.118952         | 88.063114         | 158.092403        | 79.549839         |                    |                 |

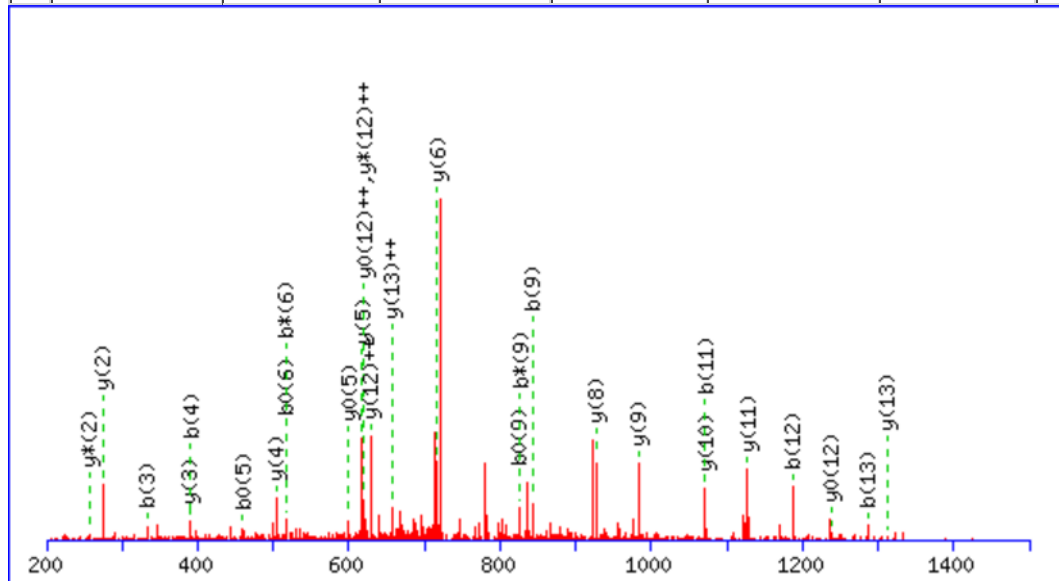

## Peptide View

MS/MS Fragmentation of **VFDKDGNGYISAAELR**

Found in **IPI00075248**, Tax\_Id=9606 Gene\_Symbol=CALM3;CALM2;CALM1 Calmodulin

Experiment: 06 - S\_B-4 Fraction: S\_B-4

Match to Query 12239: 1753.866648 from(877.940600,2+)

Title: OECHL100317\_41.13664.13664.2.dta

Data file \\Boromir\masse\Data LTQ-Orbitrap\Chrystelle Lacroix\Etude clinique sJPU\OECHL100317\_41.raw

**Monoisotopic mass of neutral peptide Mr(calc): 1753.863495** Fixed modifications: Carbamidomethyl (C) (apply to specified residues or termini only) **Ions**

**Score: 72** **Expect: 9.5e-006** **Matches : 46/166** fragment ions using 89 most intense peaks ([help](#))

| #  | b                  | b <sup>++</sup>   | b*                 | b <sup>*++</sup>  | b <sup>0</sup>     | b <sup>0++</sup>  | Seq. | y                  | y <sup>++</sup>   | y*                 | y <sup>*++</sup>  | y <sup>0</sup>    | y <sup>0++</sup> |
|----|--------------------|-------------------|--------------------|-------------------|--------------------|-------------------|------|--------------------|-------------------|--------------------|-------------------|-------------------|------------------|
| 1  | 100.075690         | 50.541483         |                    |                   |                    |                   | V    |                    |                   |                    |                   |                   |                  |
| 2  | 247.144104         | 124.075690        |                    |                   |                    |                   | F    | 1655.802376        | 828.404826        | 1638.775827        | 819.891551        | 1637.791811       | 819.3995         |
| 3  | <b>362.171047</b>  | 181.589161        |                    |                   | 344.160482         | 172.583879        | D    | <b>1508.733962</b> | <b>754.870619</b> | 1491.707413        | <b>746.357345</b> | 1490.723397       | <b>745.8653</b>  |
| 4  | <b>490.266010</b>  | 245.636643        | 473.239461         | 237.123369        | 472.255445         | 236.631361        | K    | <b>1393.707019</b> | <b>697.357148</b> | 1376.680470        | <b>688.843873</b> | 1375.696454       | 688.3518         |
| 5  | <b>605.292953</b>  | 303.150115        | 588.266404         | 294.636840        | <b>587.282388</b>  | 294.144832        | D    | <b>1265.612056</b> | 633.309666        | <b>1248.585507</b> | 624.796392        | 1247.601491       | 624.3043         |
| 6  | 662.314417         | 331.660847        | 645.287868         | 323.147572        | 644.303852         | 322.655564        | G    | <b>1150.585113</b> | 575.796194        | 1133.558564        | 567.282920        | 1132.574548       | 566.7909         |
| 7  | 776.357344         | 388.682310        | <b>759.330795</b>  | 380.169036        | 758.346779         | 379.677028        | N    | <b>1093.563649</b> | 547.285462        | 1076.537100        | 538.772188        | 1075.553084       | 538.2801         |
| 8  | 833.378808         | <b>417.193042</b> | <b>816.352259</b>  | 408.679768        | 815.368243         | 408.187760        | G    | <b>979.520722</b>  | <b>490.263999</b> | 962.494173         | 481.750724        | 961.510157        | 481.2587         |
| 9  | <b>996.442137</b>  | 498.724707        | <b>979.415588</b>  | <b>490.211432</b> | 978.431572         | <b>489.719424</b> | Y    | <b>922.499258</b>  | 461.753267        | 905.472709         | 453.239992        | 904.488693        | 452.7479         |
| 10 | <b>1109.526201</b> | 555.266738        | <b>1092.499652</b> | 546.753464        | 1091.515636        | 546.261456        | I    | <b>759.435929</b>  | 380.221603        | 742.409380         | 371.708328        | 741.425364        | 371.2163         |
| 11 | <b>1196.558229</b> | 598.782753        | <b>1179.531680</b> | 590.269478        | <b>1178.547664</b> | 589.777470        | S    | <b>646.351865</b>  | 323.679571        | 629.325316         | 315.166296        | 628.341300        | 314.6742         |
| 12 | <b>1267.595343</b> | 634.301310        | 1250.568794        | 625.788035        | 1249.584778        | 625.296027        | A    | <b>559.319837</b>  | 280.163557        | 542.293288         | <b>271.650282</b> | 541.309272        | <b>271.1582</b>  |
| 13 | <b>1338.632457</b> | 669.819866        | 1321.605908        | 661.306592        | 1320.621892        | 660.814584        | A    | <b>488.282723</b>  | 244.644999        | 471.256174         | 236.131725        | 470.272158        | 235.6397         |
| 14 | <b>1467.675050</b> | 734.341163        | <b>1450.648501</b> | 725.827889        | 1449.664485        | 725.335881        | E    | <b>417.245609</b>  | 209.126442        | 400.219060         | 200.613168        | <b>399.235044</b> | 200.1211         |
| 15 | <b>1580.759114</b> | 790.883195        | <b>1563.732565</b> | 782.369921        | 1562.748549        | 781.877912        | L    | <b>288.203016</b>  | 144.605146        | <b>271.176467</b>  | 136.091871        |                   |                  |
| 16 |                    |                   |                    |                   |                    |                   | R    | 175.118952         | 88.063114         | 158.092403         | 79.549839         |                   |                  |

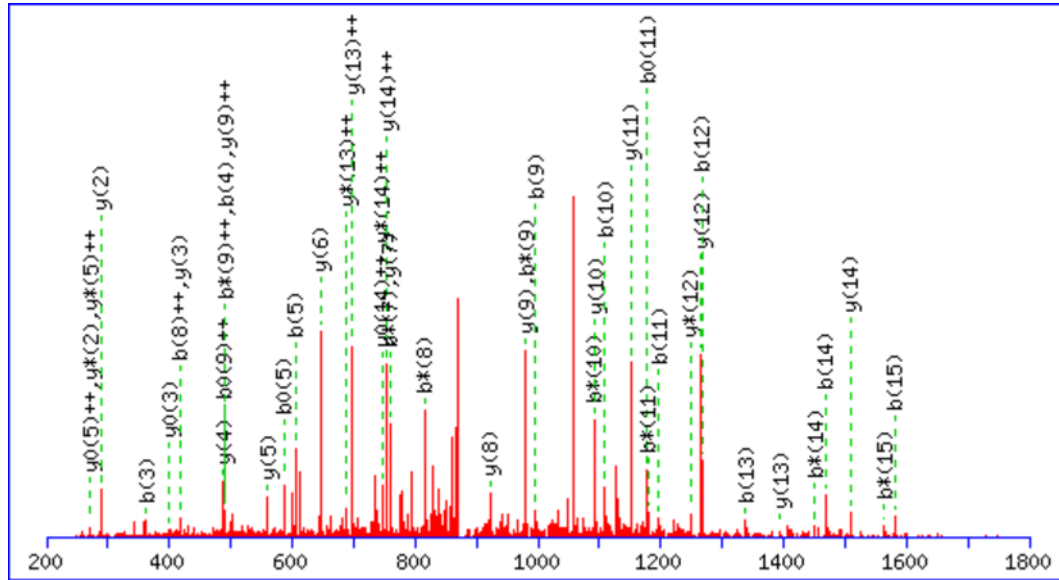

## Peptide View

MS/MS Fragmentation of **HSFKGEECPAGSHR**

Found in **IPI00021970**, Tax\_Id=9606 Gene\_Symbol=MGC31957;TNFRSF10C TNFRSF10C protein

**Experiment:** 06 - S\_B-4 **Fraction:** S\_B-4

Match to Query 10630: 1597.706172 from(533.576000,3+)

Title: OECHL100317\_41.2407.2407.3.dta

Data file \\Boromir\masse\Data LTQ-Orbitrap\Chrystelle Lacroix\Etude clinique sJPU\OECHL100317\_41.raw

**Monoisotopic mass of neutral peptide Mr(calc):** 1597.705566 **Fixed modifications:** Carbamidomethyl (C) (apply to specified residues or termini only) **Ions**

**Score:** 57 **Expect:** 0.00013 **Matches :** 27/144 fragment ions using 36 most intense peaks ([help](#))

| # | b                 | b <sup>++</sup> | b <sup>*</sup> | b <sup>*++</sup> | b <sup>0</sup> | b <sup>0++</sup> | Seq.     | y                  | y <sup>++</sup>   | y <sup>*</sup> | y <sup>*++</sup> | y <sup>0</sup> | y <sup>0++</sup> |
|---|-------------------|-----------------|----------------|------------------|----------------|------------------|----------|--------------------|-------------------|----------------|------------------|----------------|------------------|
| 1 | 138.066188        | 69.536732       |                |                  |                |                  | <b>H</b> |                    |                   |                |                  |                |                  |
| 2 | <b>225.098216</b> | 113.052746      |                |                  | 207.087651     | 104.047463       | <b>S</b> | 1461.653938        | <b>731.330607</b> | 1444.627389    | 722.817333       | 1443.643373    | 722.3253         |
| 3 | 372.166630        | 186.586953      |                |                  | 354.156065     | 177.581671       | <b>F</b> | 1374.621910        | <b>687.814593</b> | 1357.595361    | 679.301319       | 1356.611345    | 678.8093         |
| 4 | 500.261593        | 250.634435      | 483.235044     | 242.121160       | 482.251028     | 241.629152       | <b>K</b> | 1227.553496        | 614.280386        | 1210.526947    | 605.767112       | 1209.542931    | 605.2751         |
| 5 | 557.283057        | 279.145167      | 540.256508     | 270.631892       | 539.272492     | 270.139884       | <b>G</b> | <b>1099.458533</b> | 550.232905        | 1082.431984    | 541.719630       | 1081.447968    | 541.2276         |

|    |             |            |             |            |             |            |   |             |            |             |            |             |          |
|----|-------------|------------|-------------|------------|-------------|------------|---|-------------|------------|-------------|------------|-------------|----------|
| 6  | 686.325650  | 343.666463 | 669.299101  | 335.153189 | 668.315085  | 334.661181 | E | 1042.437069 | 521.722173 | 1025.410520 | 513.208898 | 1024.426504 | 512.7168 |
| 7  | 815.368243  | 408.187760 | 798.341694  | 399.674485 | 797.357678  | 399.182477 | E | 913.394476  | 457.200876 | 896.367927  | 448.687602 | 895.383911  | 448.1955 |
| 8  | 975.398892  | 488.203084 | 958.372343  | 479.689810 | 957.388327  | 479.197802 | C | 784.351883  | 392.679580 | 767.325334  | 384.166305 | 766.341318  | 383.6742 |
| 9  | 1072.451656 | 536.729466 | 1055.425107 | 528.216192 | 1054.441091 | 527.724184 | P | 624.321234  | 312.664255 | 607.294685  | 304.150981 | 606.310669  | 303.6589 |
| 10 | 1143.488770 | 572.248023 | 1126.462221 | 563.734749 | 1125.478205 | 563.242741 | A | 527.268470  | 264.137873 | 510.241921  | 255.624598 | 509.257905  | 255.1325 |
| 11 | 1200.510234 | 600.758755 | 1183.483685 | 592.245481 | 1182.499669 | 591.753473 | G | 456.231356  | 228.619316 | 439.204807  | 220.106041 | 438.220791  | 219.6140 |
| 12 | 1287.542262 | 644.274769 | 1270.515713 | 635.761495 | 1269.531697 | 635.269487 | S | 399.209892  | 200.108584 | 382.183343  | 191.595309 | 381.199327  | 191.1033 |
| 13 | 1424.601174 | 712.804225 | 1407.574625 | 704.290951 | 1406.590609 | 703.798943 | H | 312.177864  | 156.592570 | 295.151315  | 148.079295 |             |          |
| 14 |             |            |             |            |             |            | R | 175.118952  | 88.063114  | 158.092403  | 79.549839  |             |          |

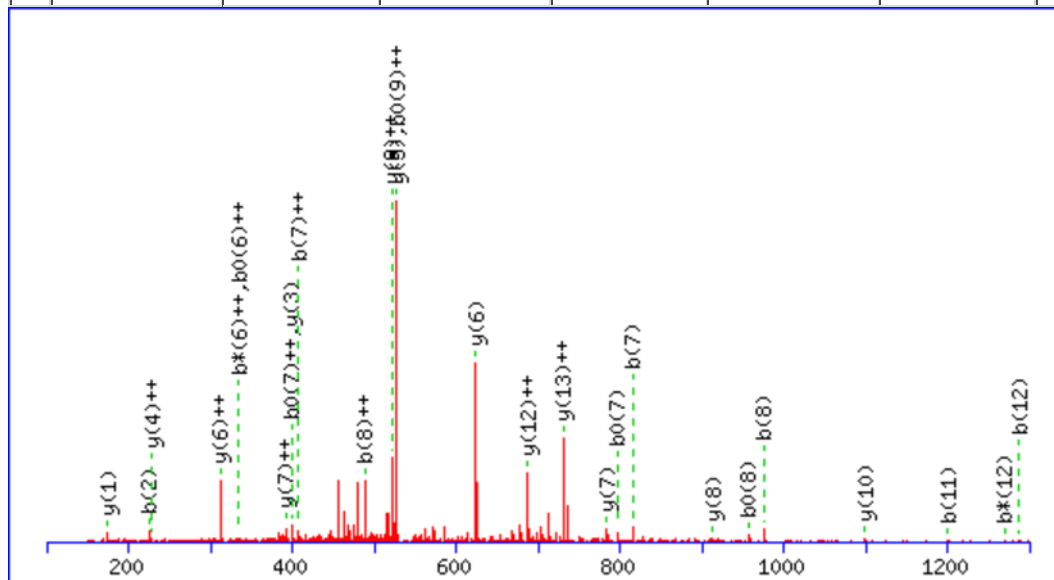

## Peptide View

MS/MS Fragmentation of **LLIYDASNLETGVPSR**

Found in **IPI00003111**, Tax\_Id=9606 Gene\_Symbol=LOC652694 Ig kappa chain V-I region AU

Experiment: 06 - S\_B-4 Fraction: S\_B-4

Match to Query 12173: 1746.916448 from(874.465500,2+)

Title: OECHL100317\_41.16827.16827.2.dta

Data file \\Boromir\masse\Data LTQ-Orbitrap\Chrystelle Lacroix\Etude clinique sJPU\OECHL100317\_41.raw

**Monoisotopic mass of neutral peptide Mr(calc):** 1746.915192**Fixed modifications:** Carbamidomethyl (C) (apply to specified residues or termini only)**Ions****Score:** 73 **Expect:** 4.7e-006**Matches :** 37/156 fragment ions using 71 most intense peaks ([help](#))

| #  | b                  | b <sup>++</sup>   | b*                 | b* <sup>++</sup> | b <sup>0</sup>     | b <sup>0++</sup> | Seq. | y                  | y <sup>++</sup>   | y*                 | y* <sup>++</sup>  | y <sup>0</sup>     | y <sup>0++</sup> |
|----|--------------------|-------------------|--------------------|------------------|--------------------|------------------|------|--------------------|-------------------|--------------------|-------------------|--------------------|------------------|
| 1  | 114.091340         | 57.549308         |                    |                  |                    |                  | L    |                    |                   |                    |                   |                    |                  |
| 2  | 227.175404         | 114.091340        |                    |                  |                    |                  | L    | 1634.838427        | 817.922852        | 1617.811878        | 809.409577        | 1616.827862        | 808.9175         |
| 3  | <b>340.259468</b>  | 170.633372        |                    |                  |                    |                  | I    | <b>1521.754363</b> | 761.380820        | 1504.727814        | <b>752.867545</b> | <b>1503.743798</b> | <b>752.3755</b>  |
| 4  | <b>503.322797</b>  | 252.165036        |                    |                  |                    |                  | Y    | 1408.670299        | <b>704.838788</b> | <b>1391.643750</b> | 696.325513        | <b>1390.659734</b> | 695.8335         |
| 5  | <b>618.349740</b>  | 309.678508        |                    |                  | 600.339175         | 300.673226       | D    | <b>1245.606970</b> | 623.307123        | 1228.580421        | 614.793849        | 1227.596405        | 614.3018         |
| 6  | <b>689.386854</b>  | 345.197065        |                    |                  | 671.376289         | 336.191782       | A    | <b>1130.580027</b> | 565.793652        | 1113.553478        | 557.280377        | 1112.569462        | 556.7883         |
| 7  | <b>776.418882</b>  | 388.713079        |                    |                  | 758.408317         | 379.707796       | S    | <b>1059.542913</b> | 530.275095        | 1042.516364        | 521.761820        | 1041.532348        | 521.2698         |
| 8  | 890.461809         | 445.734542        | 873.435260         | 437.221268       | 872.451244         | 436.729260       | N    | <b>972.510885</b>  | 486.759081        | 955.484336         | 478.245806        | 954.500320         | 477.7537         |
| 9  | <b>1003.545873</b> | 502.276574        | <b>986.519324</b>  | 493.763300       | 985.535308         | 493.271292       | L    | <b>858.467958</b>  | 429.737617        | 841.441409         | 421.224343        | 840.457393         | 420.7323         |
| 10 | <b>1132.588466</b> | 566.797871        | 1115.561917        | 558.284597       | 1114.577901        | 557.792588       | E    | <b>745.383894</b>  | 373.195585        | 728.357345         | 364.682311        | <b>727.373329</b>  | 364.1903         |
| 11 | <b>1233.636145</b> | <b>617.321710</b> | 1216.609596        | 608.808436       | 1215.625580        | 608.316428       | T    | <b>616.341301</b>  | 308.674289        | 599.314752         | 300.161014        | 598.330736         | 299.6690         |
| 12 | <b>1290.657609</b> | 645.832442        | <b>1273.631060</b> | 637.319168       | 1272.647044        | 636.827160       | G    | <b>515.293622</b>  | 258.150449        | 498.267073         | 249.637175        | 497.283057         | 249.1451         |
| 13 | <b>1389.726023</b> | 695.366649        | <b>1372.699474</b> | 686.853375       | <b>1371.715458</b> | 686.361367       | V    | <b>458.272158</b>  | 229.639717        | 441.245609         | 221.126443        | 440.261593         | 220.6344         |
| 14 | <b>1486.778787</b> | 743.893032        | 1469.752238        | 735.379757       | 1468.768222        | 734.887749       | P    | <b>359.203744</b>  | 180.105510        | <b>342.177195</b>  | 171.592236        | <b>341.193179</b>  | 171.1002         |
| 15 | <b>1573.810815</b> | 787.409046        | 1556.784266        | 778.895771       | 1555.800250        | 778.403763       | S    | 262.150980         | 131.579128        | 245.124431         | 123.065854        | 244.140415         | 122.5738         |
| 16 |                    |                   |                    |                  |                    |                  | R    | 175.118952         | 88.063114         | 158.092403         | 79.549839         |                    |                  |

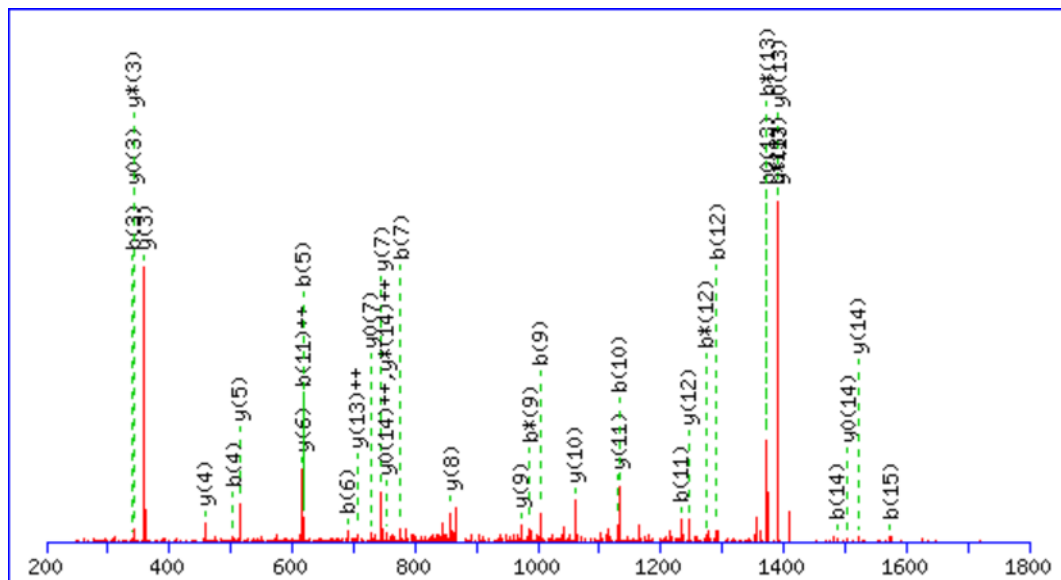

## Peptide View

### MS/MS Fragmentation of **NLEPWTTYCVQVR**

Found in **IPI00646217**, Tax\_Id=9606 Gene\_Symbol=IL10RB cDNA FLJ42063 fis, clone SYNOV2005817, highly similar to CYTOKINE RECEPTOR CLASS-II CRF2-4

**Experiment:** 06 - S\_B-4 **Fraction:** S\_B-4

Match to Query 11392: 1664.804448 from(833.409500,2+)

Title: OECHL100317\_41.17352.17352.2.dta

Data file \\Boromir\masse\Data LTQ-Orbitrap\Chrystelle Lacroix\Etude clinique sJPU\OECHL100317\_41.raw

**Monoisotopic mass of neutral peptide Mr(calc):** 1664.798080 **Fixed modifications:** Carbamidomethyl (C) (apply to specified residues or termini only) **Ions**

**Score:** 68 **Expect:** 2.1e-005 **Matches :** 20/128 fragment ions using 42 most intense peaks ([help](#))

| # | b                 | b <sup>++</sup> | b <sup>*</sup> | b <sup>*++</sup> | b <sup>0</sup> | b <sup>0++</sup> | Seq. | y                  | y <sup>++</sup>   | y <sup>*</sup> | y <sup>*++</sup> | y <sup>0</sup> | y <sup>0++</sup> |
|---|-------------------|-----------------|----------------|------------------|----------------|------------------|------|--------------------|-------------------|----------------|------------------|----------------|------------------|
| 1 | 115.050203        | 58.028740       | 98.023654      | 49.515465        |                |                  | N    |                    |                   |                |                  |                |                  |
| 2 | 228.134267        | 114.570771      | 211.107718     | 106.057497       |                |                  | L    | <b>1551.762428</b> | 776.384852        | 1534.735879    | 767.871578       | 1533.751863    | 767.3795         |
| 3 | <b>357.176860</b> | 179.092068      | 340.150311     | 170.578793       | 339.166295     | 170.086785       | E    | <b>1438.678364</b> | <b>719.842820</b> | 1421.651815    | 711.329546       | 1420.667799    | 710.8375         |
| 4 | 454.229624        | 227.618450      | 437.203075     | 219.105176       | 436.219059     | 218.613168       | P    | <b>1309.635771</b> | <b>655.321524</b> | 1292.609222    | 646.808249       | 1291.625206    | 646.3162         |

|    |             |            |             |            |             |            |   |             |            |             |            |             |          |
|----|-------------|------------|-------------|------------|-------------|------------|---|-------------|------------|-------------|------------|-------------|----------|
| 5  | 640.308937  | 320.658107 | 623.282388  | 312.144832 | 622.298372  | 311.652824 | W | 1212.583007 | 606.795142 | 1195.556458 | 598.281867 | 1194.572442 | 597.7898 |
| 6  | 741.356616  | 371.181946 | 724.330067  | 362.668672 | 723.346051  | 362.176664 | T | 1026.503694 | 513.755485 | 1009.477145 | 505.242211 | 1008.493129 | 504.7502 |
| 7  | 842.404295  | 421.705786 | 825.377746  | 413.192511 | 824.393730  | 412.700503 | T | 925.456015  | 463.231646 | 908.429466  | 454.718371 | 907.445450  | 454.2263 |
| 8  | 1005.467624 | 503.237450 | 988.441075  | 494.724176 | 987.457059  | 494.232168 | Y | 824.408336  | 412.707806 | 807.381787  | 404.194532 |             |          |
| 9  | 1165.498273 | 583.252775 | 1148.471724 | 574.739500 | 1147.487708 | 574.247492 | C | 661.345007  | 331.176142 | 644.318458  | 322.662867 |             |          |
| 10 | 1264.566687 | 632.786982 | 1247.540138 | 624.273707 | 1246.556122 | 623.781699 | V | 501.314358  | 251.160817 | 484.287809  | 242.647543 |             |          |
| 11 | 1392.625265 | 696.816271 | 1375.598716 | 688.302996 | 1374.614700 | 687.810988 | Q | 402.245944  | 201.626610 | 385.219395  | 193.113336 |             |          |
| 12 | 1491.693679 | 746.350478 | 1474.667130 | 737.837203 | 1473.683114 | 737.345195 | V | 274.187366  | 137.597321 | 257.160817  | 129.084047 |             |          |
| 13 |             |            |             |            |             |            | R | 175.118952  | 88.063114  | 158.092403  | 79.549839  |             |          |

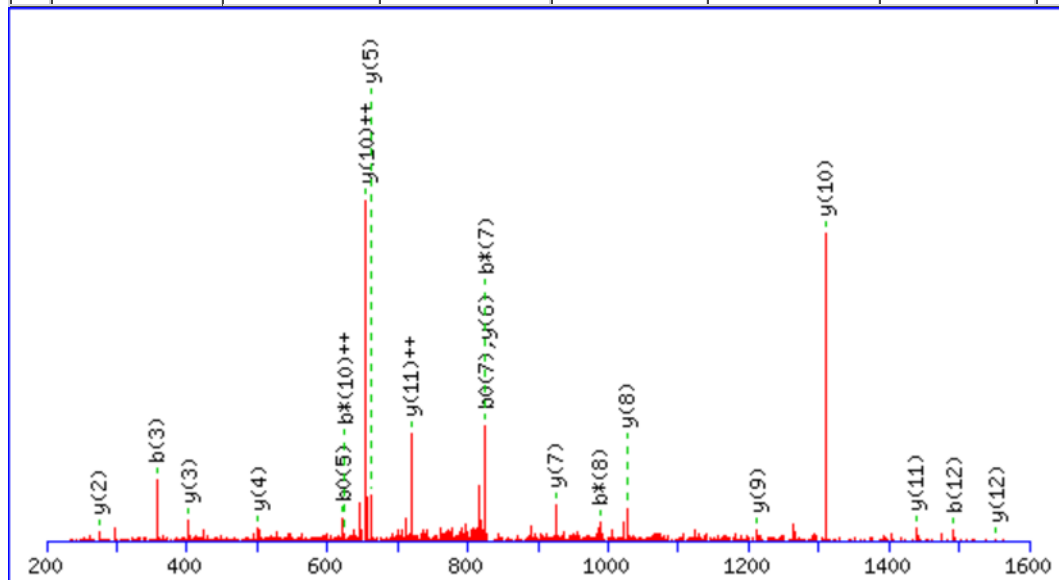

## Peptide View

MS/MS Fragmentation of **CPLQDFLR**

Found in **IPI00003807**, Tax\_Id=9606 Gene\_Symbol=ACP2 Lysosomal acid phosphatase

Experiment: 06 - S\_B-4 Fraction: S\_B-4

Match to Query 4051: 1047.518448 from(524.766500,2+)



Title: OECHL100317\_41.16775.16775.2.dta

Data file \\Boromir\masse\Data LTQ-Orbitrap\Chrystelle Lacroix\Etude clinique sJPU\OECHL100317\_41.raw

**Monoisotopic mass of neutral peptide Mr(calc):** 1047.517151**Fixed modifications:** Carbamidomethyl (C) (apply to specified residues or termini only)**Ions****Score:** 54 **Expect:** 0.00037**Matches :** 17/64 fragment ions using 27 most intense peaks ([help](#))

| # | b                 | b <sup>++</sup> | b*                | b <sup>*++</sup>  | b <sup>0</sup> | b <sup>0++</sup> | Seq. | y                 | y <sup>++</sup>   | y*                | y <sup>*++</sup> | y <sup>0</sup> | y <sup>0++</sup>  | # |
|---|-------------------|-----------------|-------------------|-------------------|----------------|------------------|------|-------------------|-------------------|-------------------|------------------|----------------|-------------------|---|
| 1 | 161.037925        | 81.022600       |                   |                   |                |                  | C    |                   |                   |                   |                  |                |                   | 8 |
| 2 | <b>258.090689</b> | 129.548982      |                   |                   |                |                  | P    | <b>888.493779</b> | <b>444.750528</b> | 871.467230        | 436.237253       | 870.483214     | <b>435.745245</b> | 7 |
| 3 | <b>371.174753</b> | 186.091015      |                   |                   |                |                  | L    | <b>791.441015</b> | <b>396.224146</b> | 774.414466        | 387.710871       | 773.430450     | 387.218863        | 6 |
| 4 | 499.233331        | 250.120304      | 482.206782        | <b>241.607029</b> |                |                  | Q    | <b>678.356951</b> | 339.682114        | <b>661.330402</b> | 331.168839       | 660.346386     | 330.676831        | 5 |
| 5 | <b>614.260274</b> | 307.633775      | 597.233725        | 299.120501        | 596.249709     | 298.628493       | D    | <b>550.298373</b> | 275.652825        | 533.271824        | 267.139550       | 532.287808     | 266.647542        | 4 |
| 6 | 761.328688        | 381.167982      | <b>744.302139</b> | 372.654708        | 743.318123     | 372.162700       | F    | <b>435.271430</b> | 218.139353        | 418.244881        | 209.626079       |                |                   | 3 |
| 7 | <b>874.412752</b> | 437.710014      | 857.386203        | 429.196740        | 856.402187     | 428.704732       | L    | <b>288.203016</b> | 144.605146        | 271.176467        | 136.091872       |                |                   | 2 |
| 8 |                   |                 |                   |                   |                |                  | R    | <b>175.118952</b> | 88.063114         | 158.092403        | 79.549840        |                |                   | 1 |

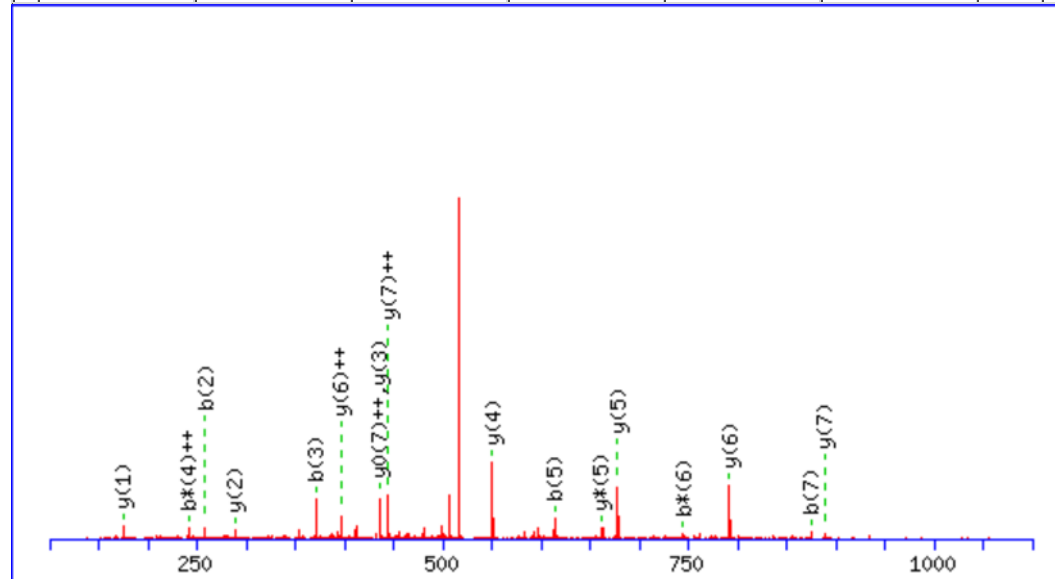

## Peptide View

MS/MS Fragmentation of **MSSPTDASVICR**

Found in **IPI00021302**, Tax\_Id=9606 Gene\_Symbol=SUSD2 Sushi domain-containing protein 2

**Experiment:** 06 - S\_B-4 **Fraction:** S\_B-4

Match to Query 7838: 1322.595648 from(662.305100,2+)

Title: OECHL100317\_41.9821.9821.2.dta

Data file \\Boromir\masse\Data LTQ-Orbitrap\Chrystelle Lacroix\Etude clinique sJPU\OECHL100317\_41.raw

**Monoisotopic mass of neutral peptide Mr(calc):** 1322.595871**Fixed modifications:** Carbamidomethyl (C) (apply to specified residues or termini only)**Ions**

**Score:** 50 **Expect:** 0.00056**Matches :** 29/100 fragment ions using 75 most intense peaks ([help](#))

| #  | b                  | b <sup>++</sup> | b <sup>0</sup>     | b <sup>0++</sup>  | Seq. | y                  | y <sup>++</sup>   | y*          | y <sup>*++</sup>  | y <sup>0</sup>     | y <sup>0++</sup>  | #  |
|----|--------------------|-----------------|--------------------|-------------------|------|--------------------|-------------------|-------------|-------------------|--------------------|-------------------|----|
| 1  | 132.047761         | 66.527518       |                    |                   | M    |                    |                   |             |                   |                    |                   | 12 |
| 2  | <b>219.079789</b>  | 110.043532      | 201.069224         | 101.038250        | S    | <b>1192.562663</b> | <b>596.784969</b> | 1175.536114 | 588.271695        | 1174.552098        | 587.779687        | 11 |
| 3  | <b>306.111817</b>  | 153.559546      | <b>288.101252</b>  | 144.554264        | S    | <b>1105.530635</b> | <b>553.268955</b> | 1088.504086 | <b>544.755681</b> | <b>1087.520070</b> | <b>544.263673</b> | 10 |
| 4  | 403.164581         | 202.085928      | <b>385.154016</b>  | 193.080646        | P    | <b>1018.498607</b> | <b>509.752942</b> | 1001.472058 | 501.239667        | 1000.488042        | 500.747659        | 9  |
| 5  | 504.212260         | 252.609768      | 486.201695         | 243.604485        | T    | <b>921.445843</b>  | 461.226560        | 904.419294  | <b>452.713285</b> | 903.435278         | <b>452.221277</b> | 8  |
| 6  | <b>619.239203</b>  | 310.123240      | 601.228638         | 301.117957        | D    | <b>820.398164</b>  | 410.702720        | 803.371615  | 402.189445        | 802.387599         | 401.697437        | 7  |
| 7  | 690.276317         | 345.641797      | 672.265752         | 336.636514        | A    | <b>705.371221</b>  | 353.189249        | 688.344672  | 344.675974        | 687.360656         | 344.183966        | 6  |
| 8  | 777.308345         | 389.157810      | <b>759.297780</b>  | 380.152528        | S    | <b>634.334107</b>  | 317.670692        | 617.307558  | 309.157417        | 616.323542         | 308.665409        | 5  |
| 9  | <b>876.376759</b>  | 438.692017      | <b>858.366194</b>  | 429.686735        | V    | <b>547.302079</b>  | 274.154678        | 530.275530  | 265.641403        |                    |                   | 4  |
| 10 | 989.460823         | 495.234049      | 971.450258         | 486.228767        | I    | <b>448.233665</b>  | 224.620470        | 431.207116  | 216.107196        |                    |                   | 3  |
| 11 | <b>1149.491472</b> | 575.249374      | <b>1131.480907</b> | <b>566.244091</b> | C    | <b>335.149601</b>  | 168.078438        | 318.123052  | 159.565164        |                    |                   | 2  |
| 12 |                    |                 |                    |                   | R    | 175.118952         | 88.063114         | 158.092403  | 79.549839         |                    |                   | 1  |

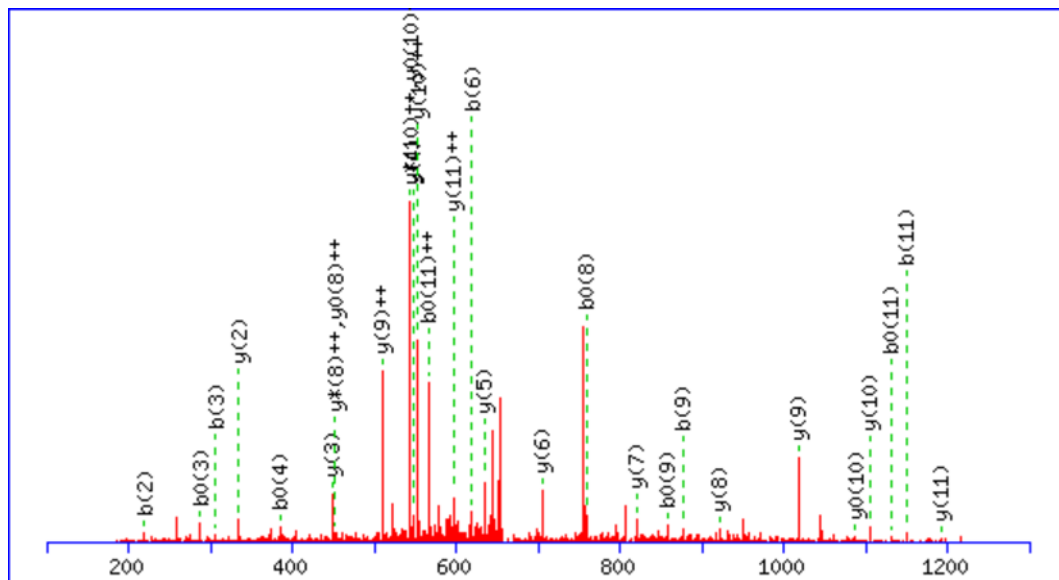

## Peptide View

MS/MS Fragmentation of **ACLDYPVTSVLPPASLCK**

Found in **IPI00023974**, Tax\_Id=9606 Gene\_Symbol=PTTG1IP Pituitary tumor-transforming gene 1 protein-interacting protein

**Experiment:** 06 - S\_B-4 **Fraction:** S\_B-4

Match to Query 14198: 1989.989048 from(996.001800,2+)

Title: OECHL100317\_41.18278.18278.2.dta

Data file \\Boromir\masse\Data LTQ-Orbitrap\Chrystelle Lacroix\Etude clinique sJPU\OECHL100317\_41.raw

**Monoisotopic mass of neutral peptide Mr(calc):** 1989.990372 **Fixed modifications:** Carbamidomethyl (C) (apply to specified residues or termini only) **Ions**

**Score:** 49 **Expect:** 0.0021 **Matches :** 11/158 fragment ions using 16 most intense peaks ([help](#))

| # | b                 | b <sup>++</sup> | b <sup>0</sup> | b <sup>0++</sup> | Seq. | y                  | y <sup>++</sup> | y <sup>*</sup> | y <sup>*++</sup> | y <sup>0</sup> | y <sup>0++</sup> | #  |
|---|-------------------|-----------------|----------------|------------------|------|--------------------|-----------------|----------------|------------------|----------------|------------------|----|
| 1 | 72.044390         | 36.525833       |                |                  | A    |                    |                 |                |                  |                |                  | 18 |
| 2 | 232.075039        | 116.541158      |                |                  | C    | 1919.960535        | 960.483906      | 1902.933986    | 951.970631       | 1901.949970    | 951.478623       | 17 |
| 3 | 345.159103        | 173.083190      |                |                  | L    | 1759.929886        | 880.468581      | 1742.903337    | 871.955307       | 1741.919321    | 871.463299       | 16 |
| 4 | 460.186046        | 230.596661      | 442.175481     | 221.591379       | D    | 1646.845822        | 823.926549      | 1629.819273    | 815.413275       | 1628.835257    | 814.921267       | 15 |
| 5 | <b>623.249375</b> | 312.128326      | 605.238810     | 303.123043       | Y    | <b>1531.818879</b> | 766.413078      | 1514.792330    | 757.899803       | 1513.808314    | 757.407795       | 14 |

|    |                    |            |                    |            |   |                    |            |             |            |             |            |    |
|----|--------------------|------------|--------------------|------------|---|--------------------|------------|-------------|------------|-------------|------------|----|
| 6  | 720.302139         | 360.654708 | 702.291574         | 351.649425 | P | <b>1368.755550</b> | 684.881413 | 1351.729001 | 676.368139 | 1350.744985 | 675.876131 | 13 |
| 7  | 819.370553         | 410.188915 | 801.359988         | 401.183632 | V | 1271.702786        | 636.355031 | 1254.676237 | 627.841757 | 1253.692221 | 627.349749 | 12 |
| 8  | 920.418232         | 460.712754 | 902.407667         | 451.707472 | T | <b>1172.634372</b> | 586.820824 | 1155.607823 | 578.307550 | 1154.623807 | 577.815542 | 11 |
| 9  | 1007.450260        | 504.228768 | 989.439695         | 495.223486 | S | <b>1071.586693</b> | 536.296985 | 1054.560144 | 527.783710 | 1053.576128 | 527.291702 | 10 |
| 10 | 1106.518674        | 553.762975 | 1088.508109        | 544.757693 | V | 984.554665         | 492.780971 | 967.528116  | 484.267696 | 966.544100  | 483.775688 | 9  |
| 11 | <b>1219.602738</b> | 610.305007 | 1201.592173        | 601.299725 | L | <b>885.486251</b>  | 443.246764 | 868.459702  | 434.733489 | 867.475686  | 434.241481 | 8  |
| 12 | 1316.655502        | 658.831389 | 1298.644937        | 649.826107 | P | <b>772.402187</b>  | 386.704732 | 755.375638  | 378.191457 | 754.391622  | 377.699449 | 7  |
| 13 | 1413.708266        | 707.357771 | 1395.697701        | 698.352489 | P | 675.349423         | 338.178350 | 658.322874  | 329.665075 | 657.338858  | 329.173067 | 6  |
| 14 | 1484.745380        | 742.876328 | 1466.734815        | 733.871046 | A | 578.296659         | 289.651968 | 561.270110  | 281.138693 | 560.286094  | 280.646685 | 5  |
| 15 | 1571.777408        | 786.392342 | 1553.766843        | 777.387060 | S | <b>507.259545</b>  | 254.133411 | 490.232996  | 245.620136 | 489.248980  | 245.128128 | 4  |
| 16 | 1684.861472        | 842.934374 | <b>1666.850907</b> | 833.929092 | L | 420.227517         | 210.617396 | 403.200968  | 202.104122 |             |            | 3  |
| 17 | <b>1844.892121</b> | 922.949699 | 1826.881556        | 913.944416 | C | 307.143453         | 154.075365 | 290.116904  | 145.562090 |             |            | 2  |
| 18 |                    |            |                    |            | K | 147.112804         | 74.060040  | 130.086255  | 65.546765  |             |            | 1  |

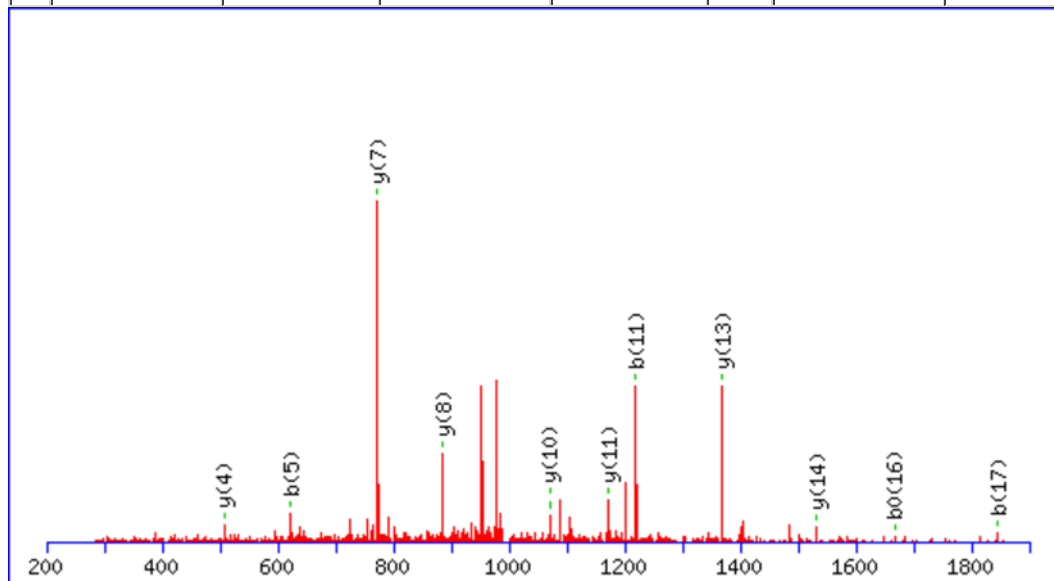

## Peptide View

MS/MS Fragmentation of **IQEVAGSLIFR**Found in **IPI00006988**, Tax\_Id=9606 Gene\_Symbol=RETN Resistin

Experiment: 03 - S\_A-3 Fraction: S\_A-3

Match to Query 7017: 1231.692448 from(616.853500,2+)

Title: OECHL100317\_39.16377.16377.2.dta

Data file \\Boromir\masse\Data LTQ-Orbitrap\Chrystelle Lacroix\Etude clinique sJPU\OECHL100317\_39.raw

Monoisotopic mass of neutral peptide Mr(calc): 1231.692459 Fixed modifications: Carbamidomethyl (C) (apply to specified residues or termini only) Ions

Score: 60 Expect: 4.2e-005 Matches : 19/106 fragment ions using 31 most intense peaks ([help](#))

| #  | b                  | b <sup>++</sup> | b*                | b <sup>*++</sup> | b <sup>0</sup>    | b <sup>0++</sup> | Seq. | y                  | y <sup>++</sup> | y*                 | y <sup>*++</sup>  | y <sup>0</sup> | y <sup>0++</sup> |
|----|--------------------|-----------------|-------------------|------------------|-------------------|------------------|------|--------------------|-----------------|--------------------|-------------------|----------------|------------------|
| 1  | 114.091340         | 57.549308       |                   |                  |                   |                  | I    |                    |                 |                    |                   |                |                  |
| 2  | <b>242.149918</b>  | 121.578597      | <b>225.123369</b> | 113.065323       |                   |                  | Q    | <b>1119.615685</b> | 560.311481      | <b>1102.589136</b> | 551.798206        | 1101.605120    | 551.306100       |
| 3  | <b>371.192511</b>  | 186.099894      | 354.165962        | 177.586619       | 353.181946        | 177.094611       | E    | <b>991.557107</b>  | 496.282192      | 974.530558         | 487.768917        | 973.546542     | 487.276900       |
| 4  | <b>470.260925</b>  | 235.634101      | 453.234376        | 227.120826       | 452.250360        | 226.628818       | V    | <b>862.514514</b>  | 431.760895      | 845.487965         | 423.247621        | 844.503949     | 422.755600       |
| 5  | <b>541.298039</b>  | 271.152658      | 524.271490        | 262.639383       | 523.287474        | 262.147375       | A    | <b>763.446100</b>  | 382.226688      | 746.419551         | 373.713414        | 745.435535     | 373.221400       |
| 6  | <b>598.319503</b>  | 299.663390      | 581.292954        | 291.150115       | 580.308938        | 290.658107       | G    | <b>692.408986</b>  | 346.708131      | 675.382437         | 338.194857        | 674.398421     | 337.702800       |
| 7  | 685.351531         | 343.179404      | 668.324982        | 334.666129       | 667.340966        | 334.174121       | S    | 635.387522         | 318.197399      | 618.360973         | 309.684125        | 617.376957     | 309.192100       |
| 8  | <b>798.435595</b>  | 399.721436      | 781.409046        | 391.208161       | 780.425030        | 390.716153       | L    | 548.355494         | 274.681385      | 531.328945         | <b>266.168111</b> |                |                  |
| 9  | <b>911.519659</b>  | 456.263468      | 894.493110        | 447.750193       | <b>893.509094</b> | 447.258185       | I    | <b>435.271430</b>  | 218.139353      | 418.244881         | 209.626078        |                |                  |
| 10 | <b>1058.588073</b> | 529.797675      | 1041.561524       | 521.284400       | 1040.577508       | 520.792392       | F    | <b>322.187366</b>  | 161.597321      | 305.160817         | 153.084046        |                |                  |
| 11 |                    |                 |                   |                  |                   |                  | R    | 175.118952         | 88.063114       | 158.092403         | 79.549839         |                |                  |

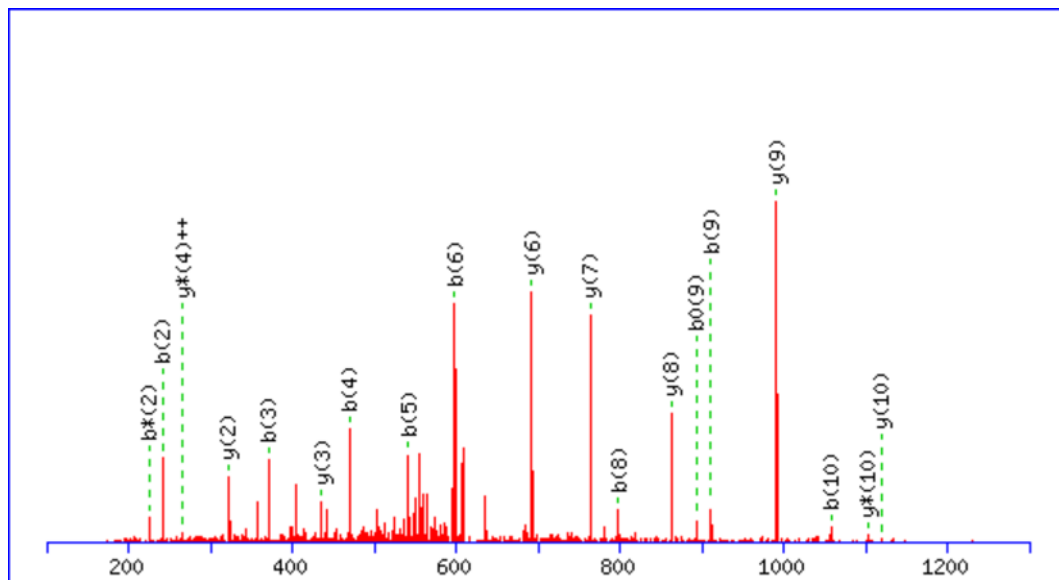

## Peptide View

MS/MS Fragmentation of **DFSLTSSSQTPGATK**

Found in **IPI00291300**, Tax\_Id=9606 Gene\_Symbol=PODXL2 Putative uncharacterized protein PODXL2

**Experiment:** 03 - S\_A-3 **Fraction:** S\_A-3

Match to Query 10192: 1525.725448 from(763.870000,2+)

Title: OECHL100317\_39.10807.10807.2.dta

Data file \\Boromir\masse\Data LTQ-Orbitrap\Chrystelle Lacroix\Etude clinique sJPU\OECHL100317\_39.raw

**Monoisotopic mass of neutral peptide Mr(calc):** 1525.726028 **Fixed modifications:** Carbamidomethyl (C) (apply to specified residues or termini only) **Ions**

**Score:** 85 **Expect:** 3.5e-007 **Matches :** 44/150 fragment ions using 84 most intense peaks ([help](#))

| # | b                 | b <sup>++</sup> | b* | b <sup>*++</sup> | b <sup>0</sup>    | b <sup>0++</sup> | Seq.     | y                  | y <sup>++</sup>   | y*          | y <sup>*++</sup> | y <sup>0</sup> | y <sup>0++</sup> |
|---|-------------------|-----------------|----|------------------|-------------------|------------------|----------|--------------------|-------------------|-------------|------------------|----------------|------------------|
| 1 | 116.034219        | 58.520748       |    |                  | 98.023654         | 49.515465        | <b>D</b> |                    |                   |             |                  |                |                  |
| 2 | <b>263.102633</b> | 132.054954      |    |                  | <b>245.092068</b> | 123.049672       | <b>F</b> | 1411.706351        | 706.356813        | 1394.679802 | 697.843539       | 1393.695786    | 697.3515         |
| 3 | <b>350.134661</b> | 175.570968      |    |                  | <b>332.124096</b> | 166.565686       | <b>S</b> | <b>1264.637937</b> | <b>632.822607</b> | 1247.611388 | 624.309332       | 1246.627372    | 623.8173         |
| 4 | <b>463.218725</b> | 232.113001      |    |                  | <b>445.208160</b> | 223.107718       | <b>L</b> | <b>1177.605909</b> | <b>589.306592</b> | 1160.579360 | 580.793318       | 1159.595344    | 580.3013         |
| 5 | <b>564.266404</b> | 282.636840      |    |                  | <b>546.255839</b> | 273.631558       | <b>T</b> | <b>1064.521845</b> | <b>532.764561</b> | 1047.495296 | 524.251286       | 1046.511280    | 523.7592         |

|    |                    |            |                    |            |  |                    |                   |   |                   |            |            |                   |                   |                 |
|----|--------------------|------------|--------------------|------------|--|--------------------|-------------------|---|-------------------|------------|------------|-------------------|-------------------|-----------------|
| 6  | <b>651.298432</b>  | 326.152854 |                    |            |  | <b>633.287867</b>  | 317.147572        | S | <b>963.474166</b> | 482.240721 | 946.447617 | <b>473.727446</b> | <b>945.463601</b> | <b>473.2354</b> |
| 7  | <b>738.330460</b>  | 369.668868 |                    |            |  | <b>720.319895</b>  | 360.663586        | S | <b>876.442138</b> | 438.724707 | 859.415589 | 430.211432        | <b>858.431573</b> | 429.7194        |
| 8  | <b>825.362488</b>  | 413.184882 |                    |            |  | 807.351923         | <b>404.179599</b> | S | <b>789.410110</b> | 395.208693 | 772.383561 | 386.695418        | 771.399545        | 386.2034        |
| 9  | <b>953.421066</b>  | 477.214171 | 936.394517         | 468.700897 |  | <b>935.410501</b>  | 468.208889        | Q | <b>702.378082</b> | 351.692679 | 685.351533 | 343.179404        | 684.367517        | 342.6873        |
| 10 | <b>1054.468745</b> | 527.738010 | <b>1037.442196</b> | 519.224736 |  | <b>1036.458180</b> | 518.732728        | T | <b>574.319504</b> | 287.663390 | 557.292955 | 279.150115        | 556.308939        | 278.6581        |
| 11 | <b>1151.521509</b> | 576.264392 | 1134.494960        | 567.751118 |  | 1133.510944        | 567.259110        | P | <b>473.271825</b> | 237.139550 | 456.245276 | 228.626276        | <b>455.261260</b> | 228.1342        |
| 12 | <b>1208.542973</b> | 604.775124 | 1191.516424        | 596.261850 |  | 1190.532408        | 595.769842        | G | 376.219061        | 188.613168 | 359.192512 | 180.099894        | 358.208496        | 179.6078        |
| 13 | <b>1279.580087</b> | 640.293681 | 1262.553538        | 631.780407 |  | <b>1261.569522</b> | 631.288399        | A | 319.197597        | 160.102436 | 302.171048 | 151.589162        | 301.187032        | 151.0971        |
| 14 | <b>1380.627766</b> | 690.817521 | <b>1363.601217</b> | 682.304246 |  | <b>1362.617201</b> | 681.812238        | T | <b>248.160483</b> | 124.583879 | 231.133934 | 116.070605        | 230.149918        | 115.5785        |
| 15 |                    |            |                    |            |  |                    |                   | K | 147.112804        | 74.060040  | 130.086255 | 65.546765         |                   |                 |

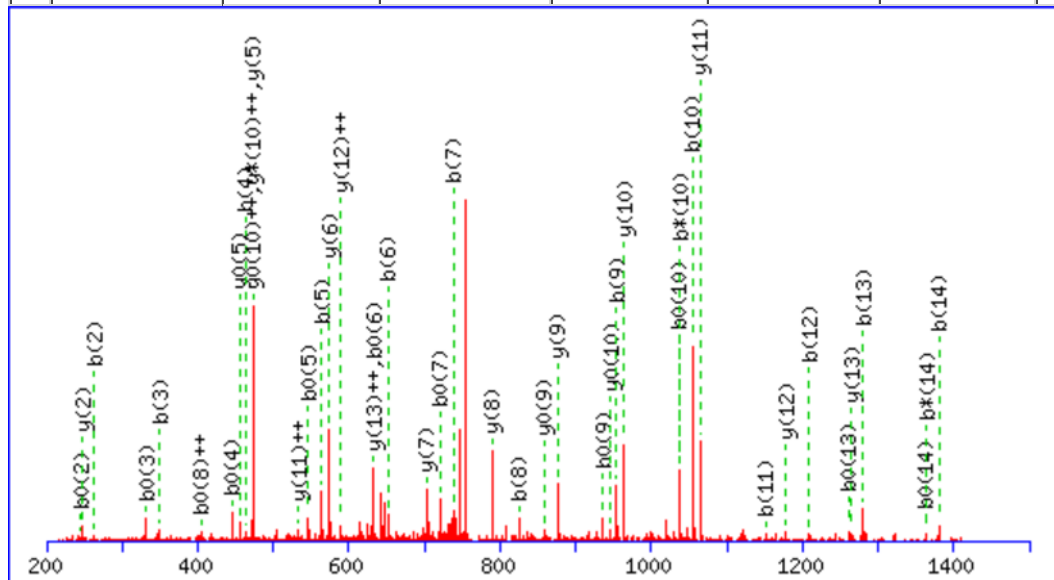

## Peptide View

MS/MS Fragmentation of **EIVLTQSPATLSLSPGER**

Found in **IPI00816799**, Tax\_Id=9606 Gene\_Symbol=- Rheumatoid factor D5 light chain (Fragment)

Experiment: 03 - S\_A-3 Fraction: S\_A-3

Match to Query 13179: 1897.018048 from(949.516300,2+)

Title: OECHL100317\_39.16247.16247.2.dta

Data file \\Boromir\masse\Data LTQ-Orbitrap\Chrystelle Lacroix\Etude clinique sJPU\OECHL100317\_39.raw

**Monoisotopic mass of neutral peptide Mr(calc):** 1897.015640**Fixed modifications:** Carbamidomethyl (C) (apply to specified residues or termini only)**Ions****Score:** 79 **Expect:** 1.3e-006**Matches :** 18/192 fragment ions using 31 most intense peaks ([help](#))

| #  | b           | b <sup>++</sup> | b*          | b <sup>*++</sup> | b <sup>0</sup> | b <sup>0++</sup> | Seq. | y           | y <sup>++</sup> | y*          | y <sup>*++</sup> | y <sup>0</sup> | y <sup>0++</sup> |
|----|-------------|-----------------|-------------|------------------|----------------|------------------|------|-------------|-----------------|-------------|------------------|----------------|------------------|
| 1  | 130.049869  | 65.528572       |             |                  | 112.039304     | 56.523290        | E    |             |                 |             |                  |                |                  |
| 2  | 243.133933  | 122.070605      |             |                  | 225.123368     | 113.065322       | I    | 1768.980341 | 884.993808      | 1751.953792 | 876.480534       | 1750.969776    | 875.9885         |
| 3  | 342.202347  | 171.604812      |             |                  | 324.191782     | 162.599529       | V    | 1655.896277 | 828.451776      | 1638.869728 | 819.938502       | 1637.885712    | 819.4464         |
| 4  | 455.286411  | 228.146844      |             |                  | 437.275846     | 219.141561       | L    | 1556.827863 | 778.917569      | 1539.801314 | 770.404295       | 1538.817298    | 769.9122         |
| 5  | 556.334090  | 278.670683      |             |                  | 538.323525     | 269.665401       | T    | 1443.743799 | 722.375537      | 1426.717250 | 713.862263       | 1425.733234    | 713.3702         |
| 6  | 684.392668  | 342.699972      | 667.366119  | 334.186698       | 666.382103     | 333.694690       | Q    | 1342.696120 | 671.851698      | 1325.669571 | 663.338423       | 1324.685555    | 662.8464         |
| 7  | 771.424696  | 386.215986      | 754.398147  | 377.702712       | 753.414131     | 377.210704       | S    | 1214.637542 | 607.822409      | 1197.610993 | 599.309134       | 1196.626977    | 598.8171         |
| 8  | 868.477460  | 434.742368      | 851.450911  | 426.229094       | 850.466895     | 425.737086       | P    | 1127.605514 | 564.306395      | 1110.578965 | 555.793120       | 1109.594949    | 555.3011         |
| 9  | 939.514574  | 470.260925      | 922.488025  | 461.747651       | 921.504009     | 461.255643       | A    | 1030.552750 | 515.780013      | 1013.526201 | 507.266738       | 1012.542185    | 506.7747         |
| 10 | 1040.562253 | 520.784765      | 1023.535704 | 512.271490       | 1022.551688    | 511.779482       | T    | 959.515636  | 480.261456      | 942.489087  | 471.748181       | 941.505071     | 471.2561         |
| 11 | 1153.646317 | 577.326797      | 1136.619768 | 568.813522       | 1135.635752    | 568.321514       | L    | 858.467957  | 429.737616      | 841.441408  | 421.224342       | 840.457392     | 420.7323         |
| 12 | 1240.678345 | 620.842811      | 1223.651796 | 612.329536       | 1222.667780    | 611.837528       | S    | 745.383893  | 373.195585      | 728.357344  | 364.682310       | 727.373328     | 364.1903         |
| 13 | 1353.762409 | 677.384842      | 1336.735860 | 668.871568       | 1335.751844    | 668.379560       | L    | 658.351865  | 329.679570      | 641.325316  | 321.166296       | 640.341300     | 320.6742         |
| 14 | 1440.794437 | 720.900857      | 1423.767888 | 712.387582       | 1422.783872    | 711.895574       | S    | 545.267801  | 273.137539      | 528.241252  | 264.624264       | 527.257236     | 264.1322         |
| 15 | 1537.847201 | 769.427239      | 1520.820652 | 760.913964       | 1519.836636    | 760.421956       | P    | 458.235773  | 229.621524      | 441.209224  | 221.108250       | 440.225208     | 220.6162         |
| 16 | 1594.868665 | 797.937971      | 1577.842116 | 789.424696       | 1576.858100    | 788.932688       | G    | 361.183009  | 181.095142      | 344.156460  | 172.581868       | 343.172444     | 172.0898         |
| 17 | 1723.911258 | 862.459267      | 1706.884709 | 853.945992       | 1705.900693    | 853.453984       | E    | 304.161545  | 152.584410      | 287.134996  | 144.071136       | 286.150980     | 143.5791         |
| 18 |             |                 |             |                  |                |                  | R    | 175.118952  | 88.063114       | 158.092403  | 79.549839        |                |                  |



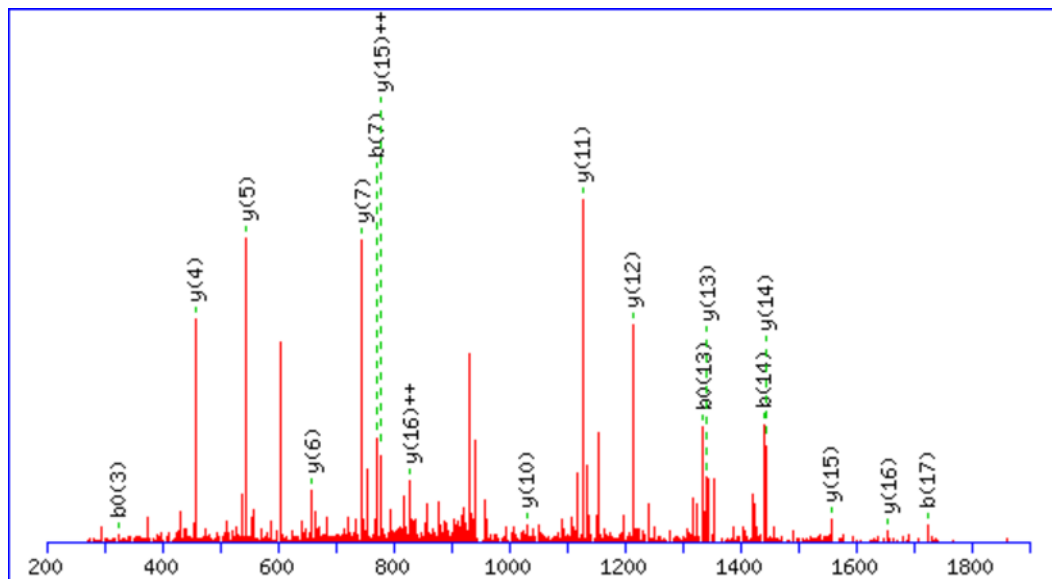

## Peptide View

MS/MS Fragmentation of **LLYDASNLETGVPSR**

Found in **IPI00003111**, Tax\_Id=9606 Gene\_Symbol=LOC652694 Ig kappa chain V-I region AU

**Experiment:** 03 - S\_A-3 **Fraction:** S\_A-3

Match to Query 12073: 1746.916448 from(874.465500,2+)

Title: OECHL100317\_39.16441.16441.2.dta

Data file \\Boromir\masse\Data LTQ-Orbitrap\Chrystelle Lacroix\Etude clinique sJPU\OECHL100317\_39.raw

**Monoisotopic mass of neutral peptide Mr(calc):** 1746.915192 **Fixed modifications:** Carbamidomethyl (C) (apply to specified residues or termini only) **Ions**

**Score:** 65 **Expect:** 3.4e-005 **Matches :** 32/156 fragment ions using 59 most intense peaks ([help](#))

| # | b                 | b <sup>++</sup> | b* | b <sup>*++</sup> | b <sup>0</sup> | b <sup>0++</sup> | Seq. | y                  | y <sup>++</sup>   | y*          | y <sup>*++</sup> | y <sup>0</sup>     | y <sup>0++</sup> |
|---|-------------------|-----------------|----|------------------|----------------|------------------|------|--------------------|-------------------|-------------|------------------|--------------------|------------------|
| 1 | 114.091340        | 57.549308       |    |                  |                |                  | L    |                    |                   |             |                  |                    |                  |
| 2 | 227.175404        | 114.091340      |    |                  |                |                  | L    | 1634.838427        | 817.922852        | 1617.811878 | 809.409577       | 1616.827862        | 808.9175         |
| 3 | <b>340.259468</b> | 170.633372      |    |                  |                |                  | I    | <b>1521.754363</b> | 761.380820        | 1504.727814 | 752.867545       | 1503.743798        | 752.3755         |
| 4 | 503.322797        | 252.165036      |    |                  |                |                  | Y    | 1408.670299        | <b>704.838788</b> | 1391.643750 | 696.325513       | <b>1390.659734</b> | 695.8335         |
| 5 | <b>618.349740</b> | 309.678508      |    |                  | 600.339175     | 300.673226       | D    | <b>1245.606970</b> | 623.307123        | 1228.580421 | 614.793849       | <b>1227.596405</b> | 614.3018         |

|    |                    |                   |                    |            |                    |            |   |                    |                   |                   |            |                   |          |
|----|--------------------|-------------------|--------------------|------------|--------------------|------------|---|--------------------|-------------------|-------------------|------------|-------------------|----------|
| 6  | 689.386854         | 345.197065        |                    |            | 671.376289         | 336.191782 | A | <b>1130.580027</b> | 565.793652        | 1113.553478       | 557.280377 | 1112.569462       | 556.7883 |
| 7  | 776.418882         | 388.713079        |                    |            | 758.408317         | 379.707796 | S | <b>1059.542913</b> | 530.275095        | 1042.516364       | 521.761820 | 1041.532348       | 521.2698 |
| 8  | 890.461809         | 445.734542        | <b>873.435260</b>  | 437.221268 | 872.451244         | 436.729260 | N | <b>972.510885</b>  | 486.759081        | 955.484336        | 478.245806 | 954.500320        | 477.7537 |
| 9  | <b>1003.545873</b> | 502.276574        | <b>986.519324</b>  | 493.763300 | 985.535308         | 493.271292 | L | <b>858.467958</b>  | <b>429.737617</b> | 841.441409        | 421.224343 | 840.457393        | 420.7323 |
| 10 | <b>1132.588466</b> | 566.797871        | 1115.561917        | 558.284597 | 1114.577901        | 557.792588 | E | <b>745.383894</b>  | 373.195585        | 728.357345        | 364.682311 | 727.373329        | 364.1903 |
| 11 | <b>1233.636145</b> | 617.321710        | 1216.609596        | 608.808436 | 1215.625580        | 608.316428 | T | <b>616.341301</b>  | 308.674289        | 599.314752        | 300.161014 | 598.330736        | 299.6690 |
| 12 | <b>1290.657609</b> | <b>645.832442</b> | 1273.631060        | 637.319168 | 1272.647044        | 636.827160 | G | <b>515.293622</b>  | 258.150449        | 498.267073        | 249.637175 | 497.283057        | 249.1451 |
| 13 | <b>1389.726023</b> | 695.366649        | <b>1372.699474</b> | 686.853375 | <b>1371.715458</b> | 686.361367 | V | <b>458.272158</b>  | 229.639717        | 441.245609        | 221.126443 | 440.261593        | 220.6344 |
| 14 | 1486.778787        | 743.893032        | <b>1469.752238</b> | 735.379757 | 1468.768222        | 734.887749 | P | <b>359.203744</b>  | 180.105510        | <b>342.177195</b> | 171.592236 | <b>341.193179</b> | 171.1002 |
| 15 | <b>1573.810815</b> | 787.409046        | 1556.784266        | 778.895771 | <b>1555.800250</b> | 778.403763 | S | 262.150980         | 131.579128        | 245.124431        | 123.065854 | 244.140415        | 122.5738 |
| 16 |                    |                   |                    |            |                    |            | R | 175.118952         | 88.063114         | 158.092403        | 79.549839  |                   |          |

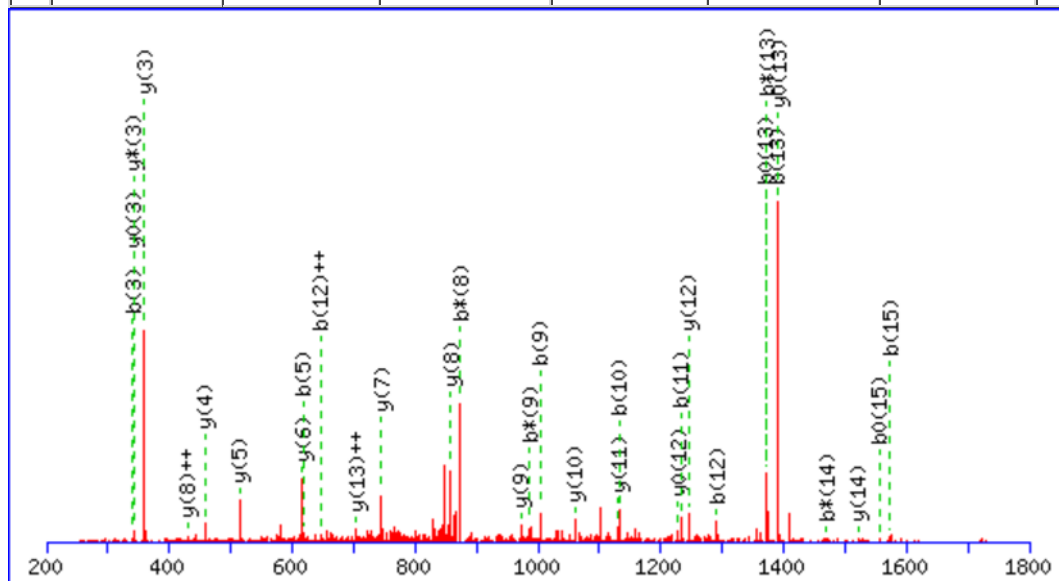

## Peptide View

MS/MS Fragmentation of **YSGSEGSTQTLTKGELK**

Found in **IPI00017526**, Tax\_Id=9606 Gene\_Symbol=S100P Protein S100-P

**Experiment:** 03 - S\_A-3 **Fraction:** S\_A-3

Match to Query 12432: 1784.878848 from(893.446700,2+)

Title: OECHL100317\_39.7461.7461.2.dta

Data file \\Boromir\masse\Data LTQ-Orbitrap\Chrystelle Lacroix\Etude clinique sJPU\OECHL100317\_39.raw

**Monoisotopic mass of neutral peptide Mr(calc):** 1784.879211**Fixed modifications:** Carbamidomethyl (C) (apply to specified residues or termini only)**Ions****Score:** 56 **Expect:** 0.0004**Matches :** 44/170 fragment ions using 117 most intense peaks ([help](#))

| #  | b           | b <sup>++</sup> | b*          | b* <sup>++</sup> | b <sup>0</sup> | b <sup>0++</sup> | Seq. | y           | y <sup>++</sup> | y*          | y* <sup>++</sup> | y <sup>0</sup> | y <sup>0++</sup> |
|----|-------------|-----------------|-------------|------------------|----------------|------------------|------|-------------|-----------------|-------------|------------------|----------------|------------------|
| 1  | 164.070605  | 82.538940       |             |                  |                |                  | Y    |             |                 |             |                  |                |                  |
| 2  | 251.102633  | 126.054954      |             |                  | 233.092068     | 117.049672       | S    | 1622.823172 | 811.915224      | 1605.796623 | 803.401950       | 1604.812607    | 802.9099         |
| 3  | 308.124097  | 154.565687      |             |                  | 290.113532     | 145.560404       | G    | 1535.791144 | 768.399210      | 1518.764595 | 759.885936       | 1517.780579    | 759.3939         |
| 4  | 395.156125  | 198.081701      |             |                  | 377.145560     | 189.076418       | S    | 1478.769680 | 739.888478      | 1461.743131 | 731.375204       | 1460.759115    | 730.8831         |
| 5  | 524.198718  | 262.602997      |             |                  | 506.188153     | 253.597715       | E    | 1391.737652 | 696.372464      | 1374.711103 | 687.859190       | 1373.727087    | 687.3671         |
| 6  | 581.220182  | 291.113729      |             |                  | 563.209617     | 282.108447       | G    | 1262.695059 | 631.851167      | 1245.668510 | 623.337893       | 1244.684494    | 622.8458         |
| 7  | 668.252210  | 334.629743      |             |                  | 650.241645     | 325.624461       | S    | 1205.673595 | 603.340436      | 1188.647046 | 594.827161       | 1187.663030    | 594.3351         |
| 8  | 769.299889  | 385.153583      |             |                  | 751.289324     | 376.148300       | T    | 1118.641567 | 559.824421      | 1101.615018 | 551.311147       | 1100.631002    | 550.8191         |
| 9  | 897.358467  | 449.182872      | 880.331918  | 440.669597       | 879.347902     | 440.177589       | Q    | 1017.593888 | 509.300582      | 1000.567339 | 500.787307       | 999.583323     | 500.2952         |
| 10 | 998.406146  | 499.706711      | 981.379597  | 491.193437       | 980.395581     | 490.701429       | T    | 889.535310  | 445.271293      | 872.508761  | 436.758018       | 871.524745     | 436.2660         |
| 11 | 1111.490210 | 556.248743      | 1094.463661 | 547.735469       | 1093.479645    | 547.243461       | L    | 788.487631  | 394.747453      | 771.461082  | 386.234179       | 770.477066     | 385.7421         |
| 12 | 1212.537889 | 606.772583      | 1195.511340 | 598.259308       | 1194.527324    | 597.767300       | T    | 675.403567  | 338.205421      | 658.377018  | 329.692147       | 657.393002     | 329.2001         |
| 13 | 1340.632852 | 670.820064      | 1323.606303 | 662.306790       | 1322.622287    | 661.814782       | K    | 574.355888  | 287.681582      | 557.329339  | 279.168307       | 556.345323     | 278.6762         |
| 14 | 1397.654316 | 699.330796      | 1380.627767 | 690.817522       | 1379.643751    | 690.325514       | G    | 446.260925  | 223.634100      | 429.234376  | 215.120826       | 428.250360     | 214.6288         |
| 15 | 1526.696909 | 763.852093      | 1509.670360 | 755.338818       | 1508.686344    | 754.846810       | E    | 389.239461  | 195.123368      | 372.212912  | 186.610094       | 371.228896     | 186.1180         |
| 16 | 1639.780973 | 820.394124      | 1622.754424 | 811.880850       | 1621.770408    | 811.388842       | L    | 260.196868  | 130.602072      | 243.170319  | 122.088797       |                |                  |
| 17 |             |                 |             |                  |                |                  | K    | 147.112804  | 74.060040       | 130.086255  | 65.546765        |                |                  |

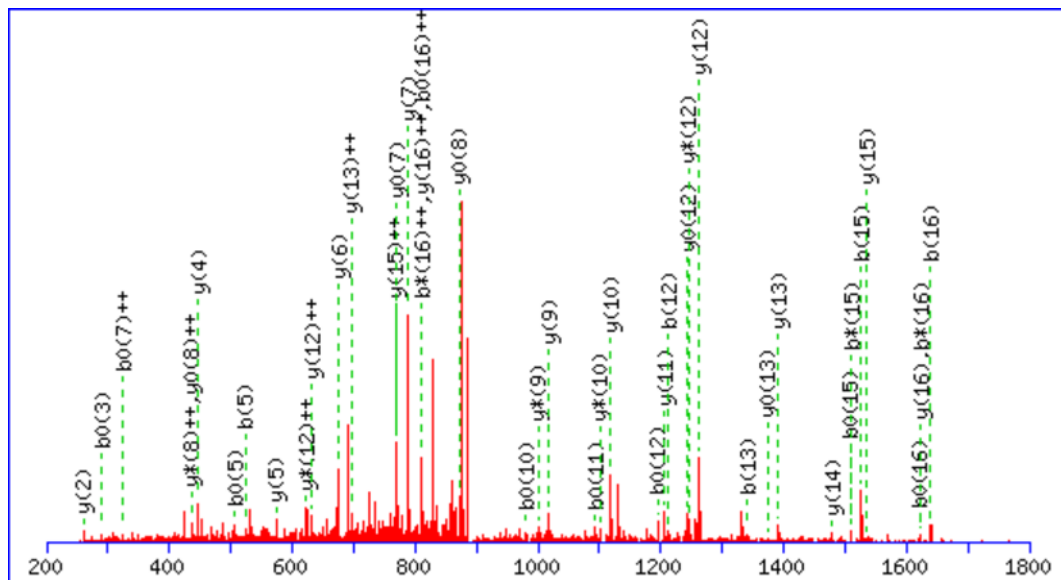

## Peptide View

MS/MS Fragmentation of **NGHQEVESPFQGR**

Found in **IPI00020747**, Tax\_Id=9606 Gene\_Symbol=SCN3B Sodium channel subunit beta-3

**Experiment:** 03 - S\_A-3 **Fraction:** S\_A-3

Match to Query 9762: 1483.681048 from(742.847800,2+)

Title: OECHL100317\_39.7647.7647.2.dta

Data file \\Boromir\masse\Data LTQ-Orbitrap\Chrystelle Lacroix\Etude clinique sJPU\OECHL100317\_39.raw

**Monoisotopic mass of neutral peptide Mr(calc):** 1483.680405 **Fixed modifications:** Carbamidomethyl (C) (apply to specified residues or termini only) **Ions**

**Score:** 50 **Expect:** 0.00093 **Matches :** 24/126 fragment ions using 62 most intense peaks ([help](#))

| # | b                 | b <sup>++</sup> | b <sup>*</sup>    | b <sup>*++</sup> | b <sup>0</sup> | b <sup>0++</sup> | Seq. | y                  | y <sup>++</sup>   | y <sup>*</sup>     | y <sup>*++</sup> | y <sup>0</sup>     | y <sup>0++</sup> |
|---|-------------------|-----------------|-------------------|------------------|----------------|------------------|------|--------------------|-------------------|--------------------|------------------|--------------------|------------------|
| 1 | 115.050203        | 58.028740       | 98.023654         | 49.515465        |                |                  | N    |                    |                   |                    |                  |                    |                  |
| 2 | 172.071667        | 86.539471       | 155.045118        | 78.026197        |                |                  | G    | 1370.644754        | 685.826015        | 1353.618205        | 677.312741       | 1352.634189        | 676.8207         |
| 3 | <b>309.130579</b> | 155.068927      | 292.104030        | 146.555653       |                |                  | H    | 1313.623290        | <b>657.315283</b> | 1296.596741        | 648.802009       | 1295.612725        | 648.3100         |
| 4 | <b>437.189157</b> | 219.098216      | 420.162608        | 210.584942       |                |                  | Q    | <b>1176.564378</b> | 588.785827        | <b>1159.537829</b> | 580.272553       | 1158.553813        | 579.7805         |
| 5 | <b>566.231750</b> | 283.619513      | <b>549.205201</b> | 275.106239       | 548.221185     | 274.614231       | E    | <b>1048.505800</b> | 524.756538        | 1031.479251        | 516.243264       | <b>1030.495235</b> | 515.7512         |

|    |                    |            |                   |            |                   |            |   |                   |            |            |            |            |          |
|----|--------------------|------------|-------------------|------------|-------------------|------------|---|-------------------|------------|------------|------------|------------|----------|
| 6  | <b>665.300164</b>  | 333.153720 | 648.273615        | 324.640446 | 647.289599        | 324.148438 | V | <b>919.463207</b> | 460.235242 | 902.436658 | 451.721967 | 901.452642 | 451.2299 |
| 7  | <b>794.342757</b>  | 397.675017 | 777.316208        | 389.161742 | 776.332192        | 388.669734 | E | <b>820.394793</b> | 410.701035 | 803.368244 | 402.187760 | 802.384228 | 401.6957 |
| 8  | <b>881.374785</b>  | 441.191031 | <b>864.348236</b> | 432.677756 | <b>863.364220</b> | 432.185748 | S | <b>691.352200</b> | 346.179738 | 674.325651 | 337.666464 | 673.341635 | 337.1744 |
| 9  | <b>978.427549</b>  | 489.717413 | 961.401000        | 481.204138 | 960.416984        | 480.712130 | P | <b>604.320172</b> | 302.663724 | 587.293623 | 294.150450 |            |          |
| 10 | <b>1125.495963</b> | 563.251620 | 1108.469414       | 554.738345 | 1107.485398       | 554.246337 | F | 507.267408        | 254.137342 | 490.240859 | 245.624068 |            |          |
| 11 | <b>1253.554541</b> | 627.280909 | 1236.527992       | 618.767634 | 1235.543976       | 618.275626 | Q | <b>360.198994</b> | 180.603135 | 343.172445 | 172.089860 |            |          |
| 12 | <b>1310.576005</b> | 655.791641 | 1293.549456       | 647.278366 | 1292.565440       | 646.786358 | G | <b>232.140416</b> | 116.573846 | 215.113867 | 108.060571 |            |          |
| 13 |                    |            |                   |            |                   |            | R | 175.118952        | 88.063114  | 158.092403 | 79.549839  |            |          |

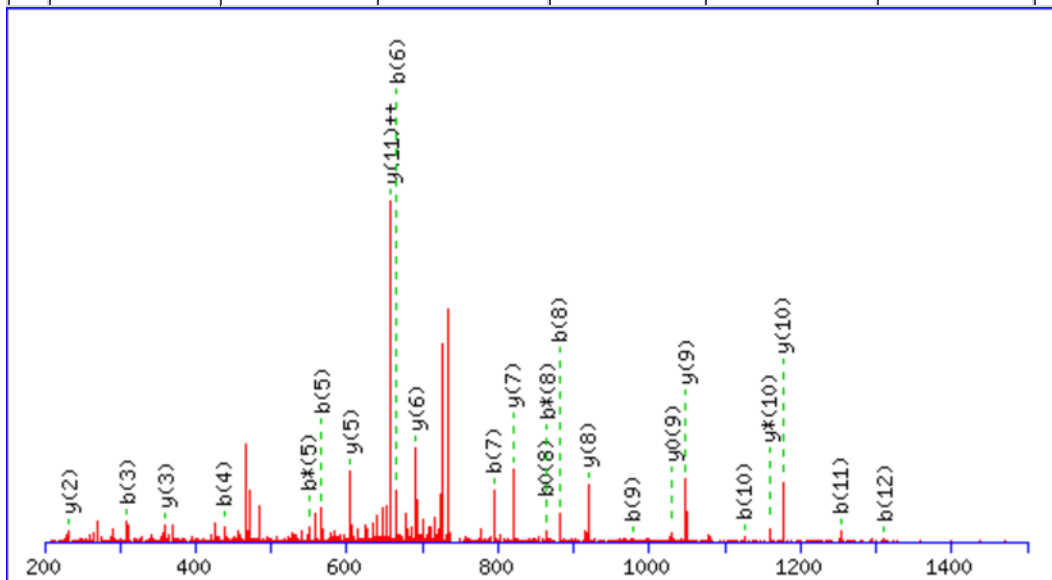

## Peptide View

MS/MS Fragmentation of **AVGLLTVISK**

Found in **IPI00013446**, Tax\_Id=9606 Gene\_Symbol=PSCA Prostate stem cell antigen

**Experiment:** 03 - S\_A-3 **Fraction:** S\_A-3

Match to Query 3212: 999.634648 from(500.824600,2+)

Title: OECHL100317\_39.16660.16660.2.dta

Data file \\Boromir\masse\Data LTQ-Orbitrap\Chrystelle Lacroix\Etude clinique sJPU\OECHL100317\_39.raw

**Monoisotopic mass of neutral peptide Mr(calc):** 999.632828**Fixed modifications:** Carbamidomethyl (C) (apply to specified residues or termini only)**Ions Score:****50 Expect:** 0.00012**Matches :** 15/78 fragment ions using 34 most intense peaks ([help](#))

| #  | b                 | b <sup>++</sup>   | b <sup>0</sup> | b <sup>0++</sup> | Seq. | y                 | y <sup>++</sup> | y*         | y <sup>*++</sup> | y <sup>0</sup> | y <sup>0++</sup> | #  |
|----|-------------------|-------------------|----------------|------------------|------|-------------------|-----------------|------------|------------------|----------------|------------------|----|
| 1  | 72.044390         | 36.525833         |                |                  | A    |                   |                 |            |                  |                |                  | 10 |
| 2  | <b>171.112804</b> | 86.060040         |                |                  | V    | 929.602995        | 465.305136      | 912.576446 | 456.791861       | 911.592430     | 456.299853       | 9  |
| 3  | <b>228.134268</b> | 114.570772        |                |                  | G    | <b>830.534581</b> | 415.770929      | 813.508032 | 407.257654       | 812.524016     | 406.765646       | 8  |
| 4  | <b>341.218332</b> | <b>171.112804</b> |                |                  | L    | <b>773.513117</b> | 387.260197      | 756.486568 | 378.746922       | 755.502552     | 378.254914       | 7  |
| 5  | <b>454.302396</b> | <b>227.654836</b> |                |                  | L    | <b>660.429053</b> | 330.718165      | 643.402504 | 322.204890       | 642.418488     | 321.712882       | 6  |
| 6  | <b>555.350075</b> | 278.178676        | 537.339510     | 269.173393       | T    | <b>547.344989</b> | 274.176133      | 530.318440 | 265.662858       | 529.334424     | 265.170850       | 5  |
| 7  | <b>654.418489</b> | 327.712883        | 636.407924     | 318.707600       | V    | 446.297310        | 223.652293      | 429.270761 | 215.139018       | 428.286745     | 214.647010       | 4  |
| 8  | <b>767.502553</b> | 384.254915        | 749.491988     | 375.249632       | I    | 347.228896        | 174.118086      | 330.202347 | 165.604811       | 329.218331     | 165.112803       | 3  |
| 9  | <b>854.534581</b> | 427.770929        | 836.524016     | 418.765646       | S    | <b>234.144832</b> | 117.576054      | 217.118283 | 109.062779       | 216.134267     | 108.570771       | 2  |
| 10 |                   |                   |                |                  | K    | 147.112804        | 74.060040       | 130.086255 | 65.546765        |                |                  | 1  |

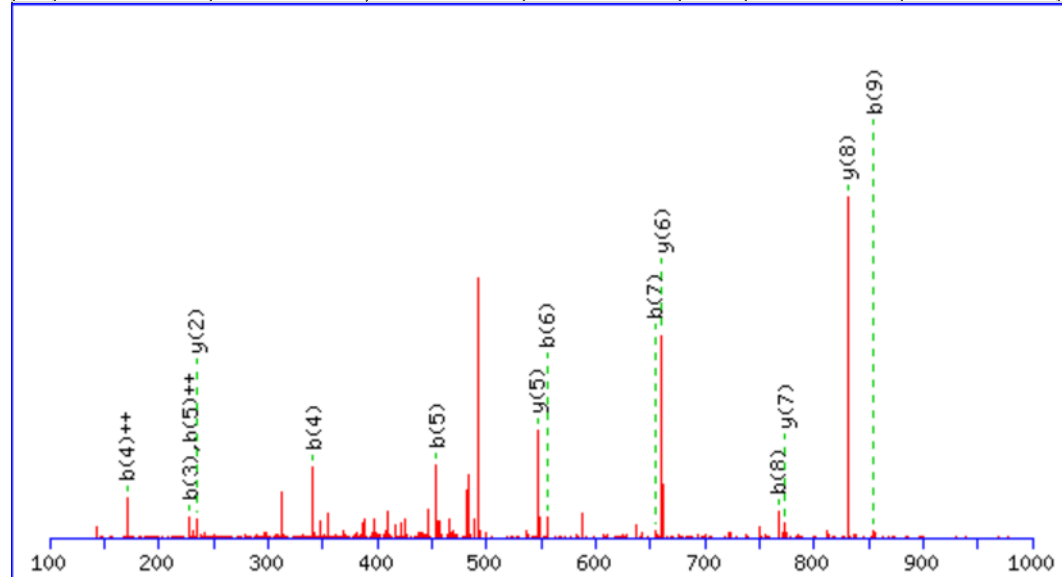

## Peptide View

MS/MS Fragmentation of **FQDGLTLYQSNTILR**Found in **IPI00219757**, Tax\_Id=9606 Gene\_Symbol=GSTP1 Glutathione S-transferase P**Experiment:** 57 - PyD-3 **Fraction:** PyD-3

Match to Query 14061: 1882.943248 from(942.478900,2+)

Title: OECHL100317\_37.18015.18015.2.dta

Data file \\Boromir\masse\Data LTQ-Orbitrap\Chrystelle Lacroix\Etude clinique sJPU\OECHL100317\_37.raw

**Monoisotopic mass of neutral peptide Mr(calc):** 1882.942490**Fixed modifications:** Carbamidomethyl (C) (apply to specified residues or termini only)**Ions****Score:** 110 **Expect:** 1.7e-009**Matches :** 13/168 fragment ions using 17 most intense peaks ([help](#))

| #  | b           | b <sup>++</sup> | b*                 | b* <sup>++</sup> | b <sup>0</sup> | b <sup>0++</sup> | Seq.     | y                  | y <sup>++</sup> | y*          | y* <sup>++</sup> | y <sup>0</sup> | y <sup>0++</sup> |
|----|-------------|-----------------|--------------------|------------------|----------------|------------------|----------|--------------------|-----------------|-------------|------------------|----------------|------------------|
| 1  | 148.075690  | 74.541483       |                    |                  |                |                  | <b>F</b> |                    |                 |             |                  |                |                  |
| 2  | 276.134268  | 138.570772      | 259.107719         | 130.057497       |                |                  | <b>Q</b> | 1736.881356        | 868.944316      | 1719.854807 | 860.431041       | 1718.870791    | 859.9390         |
| 3  | 391.161211  | 196.084243      | 374.134662         | 187.570969       | 373.150646     | 187.078961       | <b>D</b> | <b>1608.822778</b> | 804.915027      | 1591.796229 | 796.401752       | 1590.812213    | 795.9097         |
| 4  | 448.182675  | 224.594975      | 431.156126         | 216.081701       | 430.172110     | 215.589693       | <b>G</b> | 1493.795835        | 747.401555      | 1476.769286 | 738.888281       | 1475.785270    | 738.3962         |
| 5  | 563.209618  | 282.108447      | 546.183069         | 273.595172       | 545.199053     | 273.103164       | <b>D</b> | <b>1436.774371</b> | 718.890823      | 1419.747822 | 710.377549       | 1418.763806    | 709.8855         |
| 6  | 676.293682  | 338.650479      | 659.267133         | 330.137205       | 658.283117     | 329.645197       | <b>L</b> | <b>1321.747428</b> | 661.377352      | 1304.720879 | 652.864078       | 1303.736863    | 652.3720         |
| 7  | 777.341361  | 389.174319      | 760.314812         | 380.661044       | 759.330796     | 380.169036       | <b>T</b> | <b>1208.663364</b> | 604.835320      | 1191.636815 | 596.322045       | 1190.652799    | 595.8300         |
| 8  | 890.425425  | 445.716351      | 873.398876         | 437.203076       | 872.414860     | 436.711068       | <b>L</b> | <b>1107.615685</b> | 554.311480      | 1090.589136 | 545.798206       | 1089.605120    | 545.3061         |
| 9  | 1053.488754 | 527.248015      | 1036.462205        | 518.734741       | 1035.478189    | 518.242732       | <b>Y</b> | <b>994.531621</b>  | 497.769448      | 977.505072  | 489.256174       | 976.521056     | 488.7641         |
| 10 | 1181.547332 | 591.277304      | 1164.520783        | 582.764029       | 1163.536767    | 582.272021       | <b>Q</b> | <b>831.468292</b>  | 416.237784      | 814.441743  | 407.724509       | 813.457727     | 407.2325         |
| 11 | 1268.579360 | 634.793318      | 1251.552811        | 626.280044       | 1250.568795    | 625.788035       | <b>S</b> | <b>703.409714</b>  | 352.208495      | 686.383165  | 343.695220       | 685.399149     | 343.2032         |
| 12 | 1382.622287 | 691.814781      | 1365.595738        | 683.301507       | 1364.611722    | 682.809499       | <b>N</b> | <b>616.377686</b>  | 308.692481      | 599.351137  | 300.179206       | 598.367121     | 299.6871         |
| 13 | 1483.669966 | 742.338621      | 1466.643417        | 733.825347       | 1465.659401    | 733.333338       | <b>T</b> | <b>502.334759</b>  | 251.671017      | 485.308210  | 243.157743       | 484.324194     | 242.6657         |
| 14 | 1596.754030 | 798.880653      | 1579.727481        | 790.367378       | 1578.743465    | 789.875370       | <b>I</b> | <b>401.287080</b>  | 201.147178      | 384.260531  | 192.633903       |                |                  |
| 15 | 1709.838094 | 855.422685      | <b>1692.811545</b> | 846.909410       | 1691.827529    | 846.417402       | <b>L</b> | <b>288.203016</b>  | 144.605146      | 271.176467  | 136.091871       |                |                  |
| 16 |             |                 |                    |                  |                |                  | <b>R</b> | 175.118952         | 88.063114       | 158.092403  | 79.549839        |                |                  |

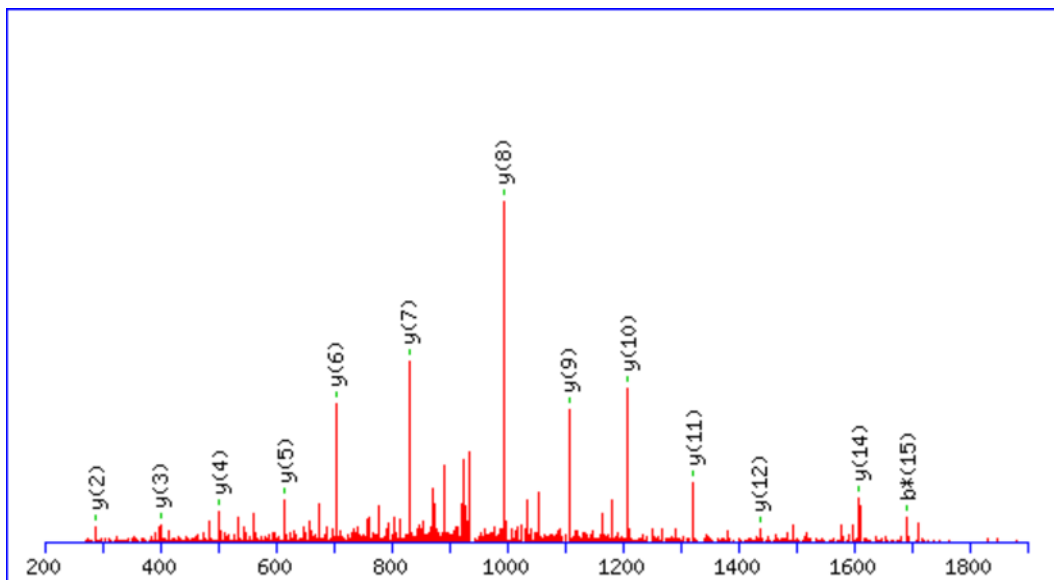

## Peptide View

MS/MS Fragmentation of **QGGFLGLSNIK**

Found in **IPI00013955**, Tax\_Id=9606 Gene\_Symbol=MUC1 Isoform 1 of Mucin-1

**Experiment:** 57 - PyD-3 **Fraction:** PyD-3

Match to Query 5694: 1132.624448 from(567.319500,2+)

Title: OECHL100317\_37.17125.17125.2.dta

Data file \\Boromir\masse\Data LTQ-Orbitrap\Chrystelle Lacroix\Etude clinique sJPU\OECHL100317\_37.raw

**Monoisotopic mass of neutral peptide Mr(calc):** 1132.624054 **Fixed modifications:** Carbamidomethyl (C) (apply to specified residues or termini only) **Ions**

**Score:** 69 **Expect:** 9.6e-006 **Matches :** 25/100 fragment ions using 38 most intense peaks ([help](#))

| # | b          | b <sup>++</sup> | b*         | b <sup>*++</sup> | b <sup>0</sup> | b <sup>0++</sup> | Seq. | y           | y <sup>++</sup> | y*         | y <sup>*++</sup> | y <sup>0</sup> | y <sup>0++</sup> | #  |
|---|------------|-----------------|------------|------------------|----------------|------------------|------|-------------|-----------------|------------|------------------|----------------|------------------|----|
| 1 | 129.065854 | 65.036565       | 112.039305 | 56.523291        |                |                  | Q    |             |                 |            |                  |                |                  | 11 |
| 2 | 186.087318 | 93.547297       | 169.060769 | 85.034023        |                |                  | G    | 1005.572757 | 503.290017      | 988.546208 | 494.776742       | 987.562192     | 494.284734       | 10 |
| 3 | 243.108782 | 122.058029      | 226.082233 | 113.544755       |                |                  | G    | 948.551293  | 474.779285      | 931.524744 | 466.266010       | 930.540728     | 465.774002       | 9  |
| 4 | 390.177196 | 195.592236      | 373.150647 | 187.078962       |                |                  | F    | 891.529829  | 446.268553      | 874.503280 | 437.755278       | 873.519264     | 437.263270       | 8  |
| 5 | 503.261260 | 252.134268      | 486.234711 | 243.620994       |                |                  | L    | 744.461415  | 372.734346      | 727.434866 | 364.221071       | 726.450850     | 363.729063       | 7  |



|    |            |            |            |            |            |            |   |            |            |            |            |            |            |   |
|----|------------|------------|------------|------------|------------|------------|---|------------|------------|------------|------------|------------|------------|---|
| 6  | 560.282724 | 280.645000 | 543.256175 | 272.131726 |            |            | G | 631.377351 | 316.192314 | 614.350802 | 307.679039 | 613.366786 | 307.187031 | 6 |
| 7  | 673.366788 | 337.187032 | 656.340239 | 328.673758 |            |            | L | 574.355887 | 287.681582 | 557.329338 | 279.168307 | 556.345322 | 278.676299 | 5 |
| 8  | 760.398816 | 380.703046 | 743.372267 | 372.189772 | 742.388251 | 371.697764 | S | 461.271823 | 231.139550 | 444.245274 | 222.626275 | 443.261258 | 222.134267 | 4 |
| 9  | 874.441743 | 437.724510 | 857.415194 | 429.211235 | 856.431178 | 428.719227 | N | 374.239795 | 187.623536 | 357.213246 | 179.110261 |            |            | 3 |
| 10 | 987.525807 | 494.266542 | 970.499258 | 485.753267 | 969.515242 | 485.261259 | I | 260.196868 | 130.602072 | 243.170319 | 122.088798 |            |            | 2 |
| 11 |            |            |            |            |            |            | K | 147.112804 | 74.060040  | 130.086255 | 65.546766  |            |            | 1 |

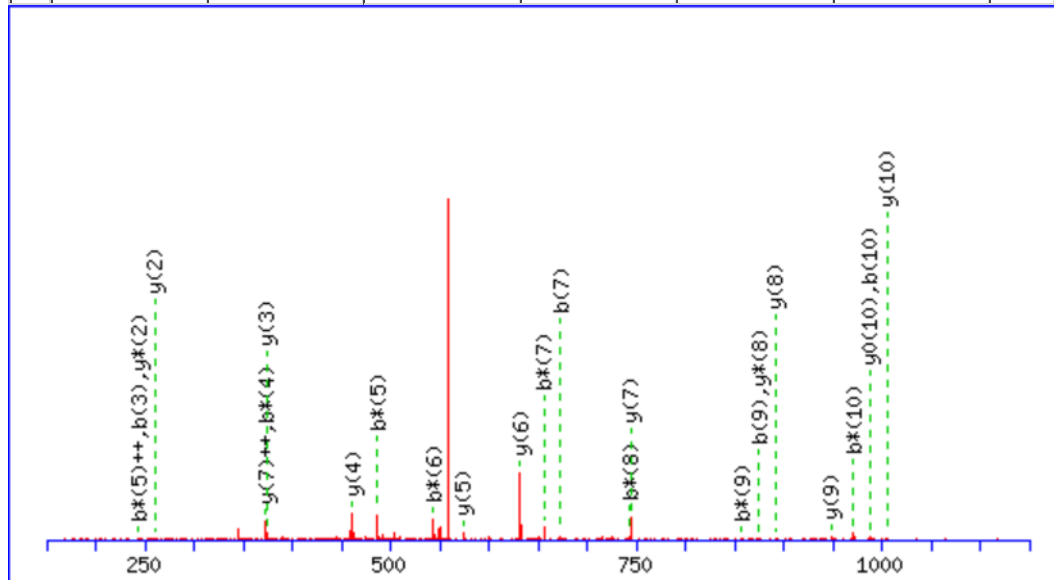

## Peptide View

MS/MS Fragmentation of **VALVTGAAQGIGR**

Found in **IPI00290420**, Tax\_Id=9606 Gene\_Symbol=HPGD hydroxyprostaglandin dehydrogenase 15-(NAD) isoform 2

Experiment: 57 - PyD-3 Fraction: PyD-3

Match to Query 6826: 1211.698648 from(606.856600,2+)

Title: OECHL100317\_37.11501.11501.2.dta

Data file \\Boromir\masse\Data LTQ-Orbitrap\Chrystelle Lacroix\Etude clinique sJPU\OECHL100317\_37.raw

**Monoisotopic mass of neutral peptide Mr(calc):** 1211.698624 **Fixed modifications:** Carbamidomethyl (C) (apply to specified residues or termini only) **Ions**

**Score:** 95 **Expect:** 1.3e-008 **Matches :** 21/104 fragment ions using 31 most intense peaks ([help](#))

| #  | <b>b</b>           | <b>b<sup>++</sup></b> | <b>b*</b>   | <b>b<sup>*++</sup></b> | <b>b<sup>0</sup></b> | <b>b<sup>0++</sup></b> | Seq. | <b>y</b>           | <b>y<sup>++</sup></b> | <b>y*</b>   | <b>y<sup>*++</sup></b> | <b>y<sup>0</sup></b> | <b>y<sup>0++</sup></b> |
|----|--------------------|-----------------------|-------------|------------------------|----------------------|------------------------|------|--------------------|-----------------------|-------------|------------------------|----------------------|------------------------|
| 1  | 100.075690         | 50.541483             |             |                        |                      |                        | V    |                    |                       |             |                        |                      |                        |
| 2  | 171.112804         | 86.060040             |             |                        |                      |                        | A    | <b>1113.637485</b> | 557.322381            | 1096.610936 | 548.809106             | 1095.626920          | 548.3170               |
| 3  | <b>284.196868</b>  | 142.602072            |             |                        |                      |                        | L    | 1042.600371        | <b>521.803824</b>     | 1025.573822 | 513.290549             | 1024.589806          | 512.7985               |
| 4  | <b>383.265282</b>  | 192.136279            |             |                        |                      |                        | V    | <b>929.516307</b>  | 465.261792            | 912.489758  | 456.748517             | 911.505742           | 456.2565               |
| 5  | <b>484.312961</b>  | 242.660119            |             |                        | <b>466.302396</b>    | 233.654836             | T    | <b>830.447893</b>  | 415.727585            | 813.421344  | 407.214310             | 812.437328           | 406.7223               |
| 6  | 541.334425         | 271.170851            |             |                        | 523.323860           | 262.165568             | G    | <b>729.400214</b>  | 365.203745            | 712.373665  | 356.690471             |                      |                        |
| 7  | 612.371539         | 306.689408            |             |                        | 594.360974           | 297.684125             | A    | <b>672.378750</b>  | 336.693013            | 655.352201  | 328.179738             |                      |                        |
| 8  | <b>683.408653</b>  | 342.207965            |             |                        | 665.398088           | 333.202682             | A    | <b>601.341636</b>  | 301.174456            | 584.315087  | 292.661182             |                      |                        |
| 9  | <b>811.467231</b>  | 406.237254            | 794.440682  | 397.723979             | 793.456666           | 397.231971             | Q    | <b>530.304522</b>  | 265.655899            | 513.277973  | 257.142625             |                      |                        |
| 10 | 868.488695         | 434.747986            | 851.462146  | 426.234711             | 850.478130           | 425.742703             | G    | <b>402.245944</b>  | 201.626610            | 385.219395  | 193.113335             |                      |                        |
| 11 | <b>981.572759</b>  | 491.290018            | 964.546210  | 482.776743             | <b>963.562194</b>    | 482.284735             | I    | <b>345.224480</b>  | 173.115878            | 328.197931  | 164.602603             |                      |                        |
| 12 | <b>1038.594223</b> | 519.800750            | 1021.567674 | 511.287475             | 1020.583658          | 510.795467             | G    | <b>232.140416</b>  | 116.573846            | 215.113867  | 108.060571             |                      |                        |
| 13 |                    |                       |             |                        |                      |                        | R    | <b>175.118952</b>  | 88.063114             | 158.092403  | 79.549839              |                      |                        |

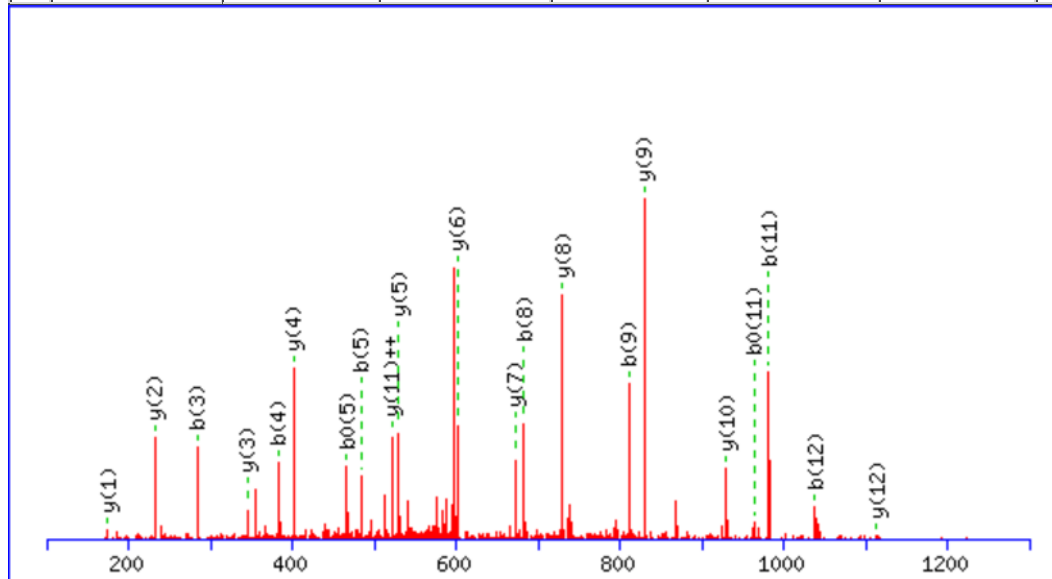

## Peptide View

MS/MS Fragmentation of **SYELTQPPSVSVSPGQTAR**

Found in **IPI00382440**, Tax\_Id=9606 Gene\_Symbol=- Ig lambda chain V-IV region Hil

Experiment: 57 - PyD-3 Fraction: PyD-3

Match to Query 14823: 2002.995448 from(1002.505000,2+)

Title: OECHL100317\_37.13335.13335.2.dta

Data file \\Boromir\masse\Data LTQ-Orbitrap\Chrystelle Lacroix\Etude clinique sJPU\OECHL100317\_37.raw

**Monoisotopic mass of neutral peptide Mr(calc):** 2002.995987**Fixed modifications:** Carbamidomethyl (C) (apply to specified residues or termini only)**Ions**

**Score:** 55 **Expect:** 0.00058**Matches :** 34/202 fragment ions using 48 most intense peaks ([help](#))

| #  | b                  | b <sup>++</sup>   | b*                 | b <sup>*++</sup>  | b <sup>0</sup>     | b <sup>0++</sup>  | Seq. | y                  | y <sup>++</sup>   | y*                 | y <sup>*++</sup>  | y <sup>0</sup> | y <sup>0++</sup> |
|----|--------------------|-------------------|--------------------|-------------------|--------------------|-------------------|------|--------------------|-------------------|--------------------|-------------------|----------------|------------------|
| 1  | 88.039304          | 44.523290         |                    |                   | 70.028739          | 35.518008         | S    |                    |                   |                    |                   |                |                  |
| 2  | 251.102633         | 126.054954        |                    |                   | 233.092068         | 117.049672        | Y    | 1916.971234        | 958.989255        | 1899.944685        | 950.475981        | 1898.960669    | 949.9839         |
| 3  | <b>380.145226</b>  | 190.576251        |                    |                   | <b>362.134661</b>  | 181.570969        | E    | 1753.907905        | 877.457591        | 1736.881356        | 868.944316        | 1735.897340    | 868.4523         |
| 4  | <b>493.229290</b>  | 247.118283        |                    |                   | <b>475.218725</b>  | 238.113001        | L    | 1624.865312        | <b>812.936294</b> | 1607.838763        | <b>804.423020</b> | 1606.854747    | 803.9310         |
| 5  | <b>594.276969</b>  | 297.642123        |                    |                   | <b>576.266404</b>  | 288.636840        | T    | <b>1511.781248</b> | 756.394262        | 1494.754699        | 747.880988        | 1493.770683    | 747.3889         |
| 6  | <b>722.335547</b>  | <b>361.671412</b> | 705.308998         | 353.158137        | <b>704.324982</b>  | 352.666129        | Q    | <b>1410.733569</b> | 705.870423        | <b>1393.707020</b> | 697.357148        | 1392.723004    | 696.8651         |
| 7  | 819.388311         | 410.197794        | 802.361762         | 401.684519        | 801.377746         | 401.192511        | P    | <b>1282.674991</b> | <b>641.841134</b> | 1265.648442        | 633.327859        | 1264.664426    | 632.8358         |
| 8  | 916.441075         | 458.724176        | 899.414526         | 450.210901        | 898.430510         | 449.718893        | P    | 1185.622227        | 593.314752        | 1168.595678        | 584.801477        | 1167.611662    | 584.3094         |
| 9  | 1003.473103        | 502.240190        | 986.446554         | <b>493.726915</b> | <b>985.462538</b>  | <b>493.234907</b> | S    | 1088.569463        | 544.788370        | 1071.542914        | 536.275095        | 1070.558898    | 535.7830         |
| 10 | <b>1102.541517</b> | 551.774397        | <b>1085.514968</b> | 543.261122        | <b>1084.530952</b> | 542.769114        | V    | 1001.537435        | 501.272356        | <b>984.510886</b>  | 492.759081        | 983.526870     | 492.2670         |
| 11 | 1189.573545        | 595.290411        | 1172.546996        | 586.777136        | 1171.562980        | 586.285128        | S    | <b>902.469021</b>  | 451.738149        | 885.442472         | 443.224874        | 884.458456     | 442.7328         |
| 12 | <b>1288.641959</b> | 644.824618        | 1271.615410        | 636.311343        | 1270.631394        | 635.819335        | V    | <b>815.436993</b>  | 408.222135        | 798.410444         | 399.708860        | 797.426428     | 399.2168         |
| 13 | 1375.673987        | 688.340632        | 1358.647438        | 679.827357        | 1357.663422        | 679.335349        | S    | <b>716.368579</b>  | 358.687928        | 699.342030         | 350.174653        | 698.358014     | 349.6826         |
| 14 | 1472.726751        | 736.867014        | 1455.700202        | 728.353739        | 1454.716186        | 727.861731        | P    | <b>629.336551</b>  | 315.171914        | 612.310002         | 306.658639        | 611.325986     | 306.1666         |
| 15 | 1529.748215        | 765.377746        | <b>1512.721666</b> | 756.864471        | <b>1511.737650</b> | 756.372463        | G    | 532.283787         | 266.645532        | 515.257238         | 258.132257        | 514.273222     | 257.6402         |
| 16 | <b>1657.806793</b> | 829.407035        | 1640.780244        | 820.893760        | 1639.796228        | 820.401752        | Q    | <b>475.262323</b>  | 238.134800        | 458.235774         | 229.621525        | 457.251758     | 229.1295         |
| 17 | <b>1758.854472</b> | 879.930874        | 1741.827923        | 871.417600        | 1740.843907        | 870.925592        | T    | 347.203745         | 174.105510        | 330.177196         | 165.592236        | 329.193180     | 165.1002         |
| 18 | <b>1829.891586</b> | 915.449431        | 1812.865037        | 906.936157        | 1811.881021        | 906.444149        | A    | 246.156066         | 123.581671        | 229.129517         | 115.068396        |                |                  |
| 19 |                    |                   |                    |                   |                    |                   | R    | 175.118952         | 88.063114         | 158.092403         | 79.549839         |                |                  |

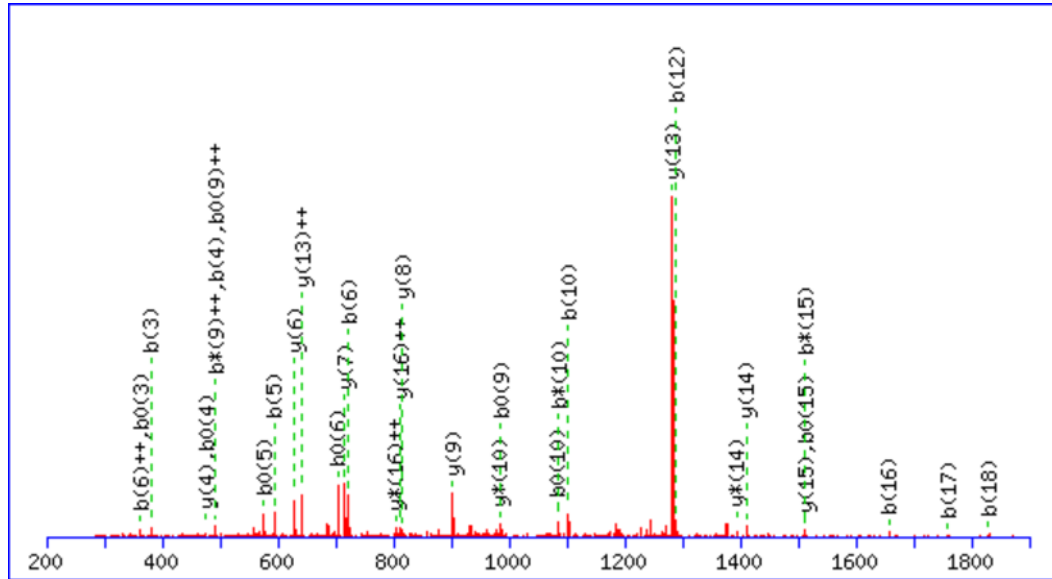

## Peptide View

MS/MS Fragmentation of **LLIYDASNLETGVPSR**

Found in **IPI00003111**, Tax\_Id=9606 Gene\_Symbol=LOC652694 Ig kappa chain V-I region AU

**Experiment:** 57 - PyD-3 **Fraction:** PyD-3

Match to Query 12999: 1746.915448 from(874.465000,2+)

Title: OECHL100317\_37.17334.17334.2.dta

Data file \\Boromir\masse\Data LTQ-Orbitrap\Chrystelle Lacroix\Etude clinique sJPU\OECHL100317\_37.raw

**Monoisotopic mass of neutral peptide Mr(calc):** 1746.915192 **Fixed modifications:** Carbamidomethyl (C) (apply to specified residues or termini only) **Ions**

**Score:** 86 **Expect:** 2.5e-007 **Matches :** 28/156 fragment ions using 42 most intense peaks ([help](#))

| # | b                 | b <sup>++</sup> | b <sup>*</sup> | b <sup>*++</sup> | b <sup>0</sup> | b <sup>0++</sup> | Seq. | y                  | y <sup>++</sup> | y <sup>*</sup> | y <sup>*++</sup> | y <sup>0</sup>     | y <sup>0++</sup> |
|---|-------------------|-----------------|----------------|------------------|----------------|------------------|------|--------------------|-----------------|----------------|------------------|--------------------|------------------|
| 1 | 114.091340        | 57.549308       |                |                  |                |                  | L    |                    |                 |                |                  |                    |                  |
| 2 | 227.175404        | 114.091340      |                |                  |                |                  | L    | 1634.838427        | 817.922852      | 1617.811878    | 809.409577       | 1616.827862        | 808.9175         |
| 3 | 340.259468        | 170.633372      |                |                  |                |                  | I    | <b>1521.754363</b> | 761.380820      | 1504.727814    | 752.867545       | 1503.743798        | 752.3755         |
| 4 | 503.322797        | 252.165036      |                |                  |                |                  | Y    | 1408.670299        | 704.838788      | 1391.643750    | 696.325513       | <b>1390.659734</b> | 695.8335         |
| 5 | <b>618.349740</b> | 309.678508      |                |                  | 600.339175     | 300.673226       | D    | <b>1245.606970</b> | 623.307123      | 1228.580421    | 614.793849       | 1227.596405        | 614.3018         |

|    |                    |                   |                    |            |             |                   |   |                    |            |                   |            |                   |          |
|----|--------------------|-------------------|--------------------|------------|-------------|-------------------|---|--------------------|------------|-------------------|------------|-------------------|----------|
| 6  | <b>689.386854</b>  | 345.197065        |                    |            | 671.376289  | 336.191782        | A | <b>1130.580027</b> | 565.793652 | 1113.553478       | 557.280377 | 1112.569462       | 556.7883 |
| 7  | 776.418882         | 388.713079        |                    |            | 758.408317  | 379.707796        | S | <b>1059.542913</b> | 530.275095 | 1042.516364       | 521.761820 | 1041.532348       | 521.2698 |
| 8  | 890.461809         | 445.734542        | 873.435260         | 437.221268 | 872.451244  | 436.729260        | N | <b>972.510885</b>  | 486.759081 | 955.484336        | 478.245806 | 954.500320        | 477.7537 |
| 9  | <b>1003.545873</b> | 502.276574        | 986.519324         | 493.763300 | 985.535308  | 493.271292        | L | <b>858.467958</b>  | 429.737617 | 841.441409        | 421.224343 | 840.457393        | 420.7323 |
| 10 | <b>1132.588466</b> | 566.797871        | 1115.561917        | 558.284597 | 1114.577901 | 557.792588        | E | <b>745.383894</b>  | 373.195585 | 728.357345        | 364.682311 | <b>727.373329</b> | 364.1903 |
| 11 | <b>1233.636145</b> | <b>617.321710</b> | 1216.609596        | 608.808436 | 1215.625580 | 608.316428        | T | <b>616.341301</b>  | 308.674289 | 599.314752        | 300.161014 | 598.330736        | 299.6690 |
| 12 | <b>1290.657609</b> | 645.832442        | 1273.631060        | 637.319168 | 1272.647044 | 636.827160        | G | <b>515.293622</b>  | 258.150449 | <b>498.267073</b> | 249.637175 | 497.283057        | 249.1451 |
| 13 | <b>1389.726023</b> | 695.366649        | <b>1372.699474</b> | 686.853375 | 1371.715458 | 686.361367        | V | <b>458.272158</b>  | 229.639717 | 441.245609        | 221.126443 | 440.261593        | 220.6344 |
| 14 | <b>1486.778787</b> | 743.893032        | 1469.752238        | 735.379757 | 1468.768222 | <b>734.887749</b> | P | <b>359.203744</b>  | 180.105510 | <b>342.177195</b> | 171.592236 | <b>341.193179</b> | 171.1002 |
| 15 | <b>1573.810815</b> | 787.409046        | 1556.784266        | 778.895771 | 1555.800250 | 778.403763        | S | 262.150980         | 131.579128 | 245.124431        | 123.065854 | 244.140415        | 122.5738 |
| 16 |                    |                   |                    |            |             |                   | R | 175.118952         | 88.063114  | 158.092403        | 79.549839  |                   |          |

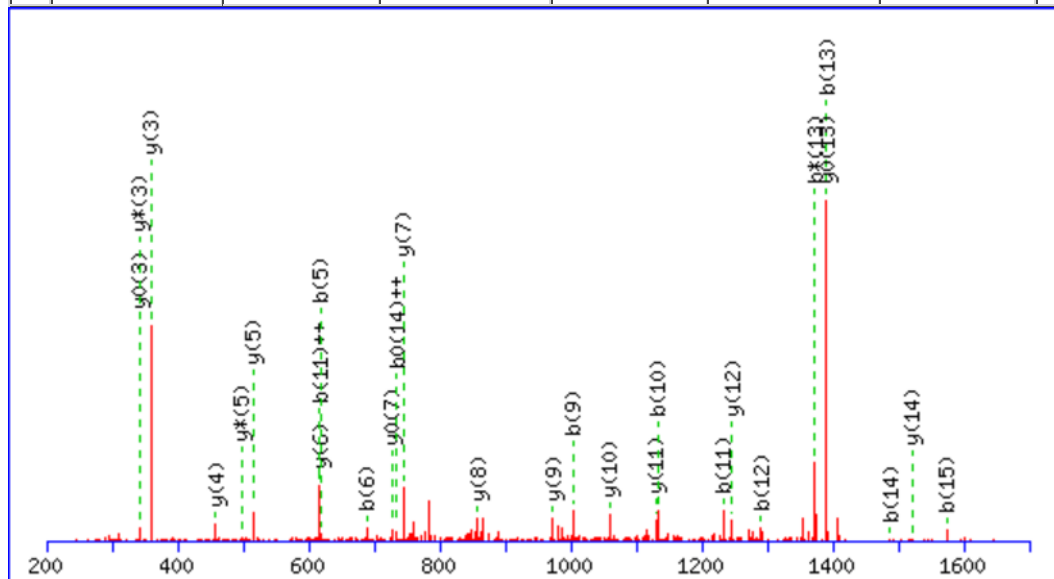

## Peptide View

MS/MS Fragmentation of **VVEQMCIQYER**

Found in **IPI00022284**, Tax\_Id=9606 Gene\_Symbol=PRNP Major prion protein

**Experiment:** 57 - PyD-3 **Fraction:** PyD-3

Match to Query 10954: 1554.720448 from(778.367500,2+)

Title: OECHL100317\_37.13249.13249.2.dta

Data file \\Boromir\masse\Data LTQ-Orbitrap\Chrystelle Lacroix\Etude clinique sJPU\OECHL100317\_37.raw

**Monoisotopic mass of neutral peptide Mr(calc):** 1554.717041 **Fixed modifications:** Carbamidomethyl (C) (apply to specified residues or termini only) **Ions****Score:** 63 **Expect:** 5.1e-005 **Matches :** 16/120 fragment ions using 27 most intense peaks ([help](#))

| #  | <b>b</b>           | <b>b<sup>++</sup></b> | <b>b<sup>*</sup></b> | <b>b<sup>*++</sup></b> | <b>b<sup>0</sup></b> | <b>b<sup>0++</sup></b> | Seq. | <b>y</b>           | <b>y<sup>++</sup></b> | <b>y<sup>*</sup></b> | <b>y<sup>*++</sup></b> | <b>y<sup>0</sup></b> | <b>y<sup>0++</sup></b> |
|----|--------------------|-----------------------|----------------------|------------------------|----------------------|------------------------|------|--------------------|-----------------------|----------------------|------------------------|----------------------|------------------------|
| 1  | 100.075690         | 50.541483             |                      |                        |                      |                        | V    |                    |                       |                      |                        |                      |                        |
| 2  | 199.144104         | 100.075690            |                      |                        |                      |                        | V    | <b>1456.655914</b> | 728.831595            | 1439.629365          | 720.318321             | 1438.645349          | 719.8263               |
| 3  | 328.186697         | 164.596987            |                      |                        | 310.176132           | 155.591704             | E    | <b>1357.587500</b> | <b>679.297388</b>     | 1340.560951          | 670.784114             | 1339.576935          | 670.2921               |
| 4  | 456.245275         | 228.626276            | 439.218726           | 220.113001             | 438.234710           | 219.620993             | Q    | <b>1228.544907</b> | 614.776092            | 1211.518358          | 606.262817             | 1210.534342          | 605.7708               |
| 5  | <b>587.285760</b>  | 294.146518            | 570.259211           | 285.633244             | 569.275195           | 285.141236             | M    | <b>1100.486329</b> | 550.746803            | 1083.459780          | 542.233528             | 1082.475764          | 541.7415               |
| 6  | 747.316409         | 374.161843            | 730.289860           | 365.648568             | 729.305844           | 365.156560             | C    | <b>969.445844</b>  | 485.226560            | 952.419295           | 476.713286             | 951.435279           | 476.2212               |
| 7  | <b>860.400473</b>  | 430.703875            | 843.373924           | 422.190600             | 842.389908           | 421.698592             | I    | 809.415195         | 405.211236            | 792.388646           | 396.697961             | 791.404630           | 396.2059               |
| 8  | 961.448152         | 481.227714            | 944.421603           | 472.714440             | 943.437587           | 472.222432             | T    | <b>696.331131</b>  | 348.669204            | <b>679.304582</b>    | 340.155929             | 678.320566           | 339.6639               |
| 9  | <b>1089.506730</b> | 545.257003            | 1072.480181          | 536.743729             | 1071.496165          | 536.251721             | Q    | <b>595.283452</b>  | 298.145364            | 578.256903           | 289.632090             | 577.272887           | 289.1400               |
| 10 | <b>1252.570059</b> | 626.788668            | 1235.543510          | 618.275393             | 1234.559494          | 617.783385             | Y    | <b>467.224874</b>  | 234.116075            | 450.198325           | 225.602801             | 449.214309           | 225.1107               |
| 11 | <b>1381.612652</b> | 691.309964            | 1364.586103          | 682.796690             | 1363.602087          | 682.304682             | E    | <b>304.161545</b>  | 152.584411            | 287.134996           | 144.071136             | 286.150980           | 143.5791               |
| 12 |                    |                       |                      |                        |                      |                        | R    | 175.118952         | 88.063114             | 158.092403           | 79.549839              |                      |                        |

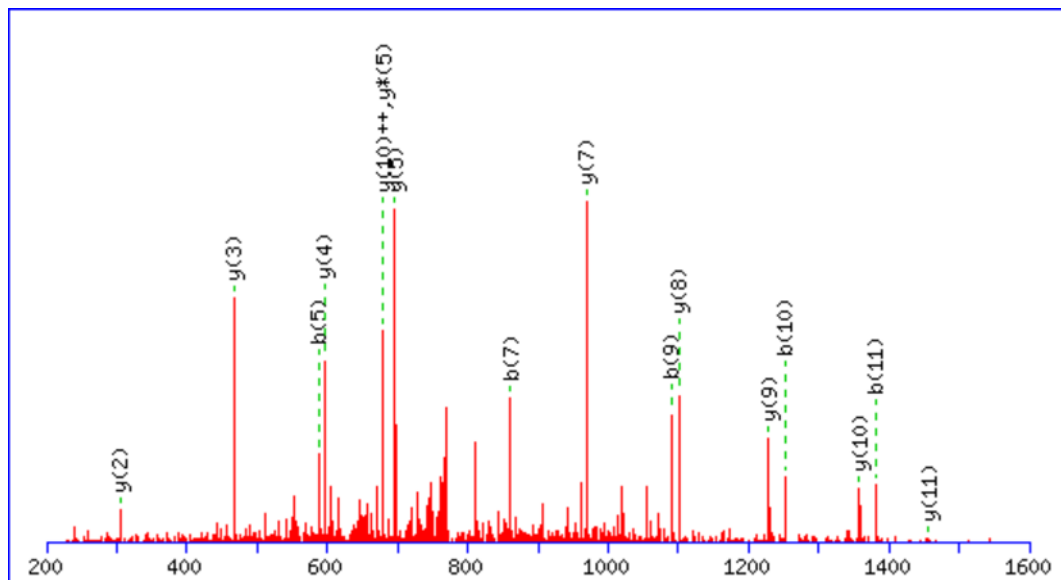

## Peptide View

MS/MS Fragmentation of **SGAPAAESKEIVR**

Found in **IPI00299977**, Tax\_Id=9606 Gene\_Symbol=PHPT1 14 kDa phosphohistidine phosphatase

**Experiment:** 57 - PyD-3 **Fraction:** PyD-3

Match to Query 8420: 1313.695848 from(657.855200,2+)

Title: OECHL100317\_37.4815.4815.2.dta

Data file \\Boromir\masse\Data LTQ-Orbitrap\Chrystelle Lacroix\Etude clinique sJPU\OECHL100317\_37.raw

**Monoisotopic mass of neutral peptide Mr(calc):** 1313.693893 **Fixed modifications:** Carbamidomethyl (C) (apply to specified residues or termini only) **Ions**

**Score:** 50 **Expect:** 0.0013 **Matches :** 18/122 fragment ions using 33 most intense peaks ([help](#))

| # | b          | b <sup>++</sup> | b* | b <sup>*++</sup> | b <sup>0</sup> | b <sup>0++</sup> | Seq. | y           | y <sup>++</sup> | y*          | y <sup>*++</sup> | y <sup>0</sup> | y <sup>0++</sup> |
|---|------------|-----------------|----|------------------|----------------|------------------|------|-------------|-----------------|-------------|------------------|----------------|------------------|
| 1 | 88.039304  | 44.523290       |    |                  | 70.028739      | 35.518008        | S    |             |                 |             |                  |                |                  |
| 2 | 145.060768 | 73.034022       |    |                  | 127.050203     | 64.028740        | G    | 1227.669177 | 614.338227      | 1210.642628 | 605.824952       | 1209.658612    | 605.3329         |
| 3 | 216.097882 | 108.552579      |    |                  | 198.087317     | 99.547296        | A    | 1170.647713 | 585.827495      | 1153.621164 | 577.314220       | 1152.637148    | 576.8222         |
| 4 | 313.150646 | 157.078961      |    |                  | 295.140081     | 148.073679       | P    | 1099.610599 | 550.308938      | 1082.584050 | 541.795663       | 1081.600034    | 541.3036         |
| 5 | 384.187760 | 192.597518      |    |                  | 366.177195     | 183.592235       | A    | 1002.557835 | 501.782556      | 985.531286  | 493.269281       | 984.547270     | 492.7772         |

|    |             |            |             |            |             |            |   |            |            |            |            |            |          |
|----|-------------|------------|-------------|------------|-------------|------------|---|------------|------------|------------|------------|------------|----------|
| 6  | 455.224874  | 228.116075 |             |            | 437.214309  | 219.110792 | A | 931.520721 | 466.263999 | 914.494172 | 457.750724 | 913.510156 | 457.2587 |
| 7  | 584.267467  | 292.637372 |             |            | 566.256902  | 283.632089 | E | 860.483607 | 430.745442 | 843.457058 | 422.232167 | 842.473042 | 421.7401 |
| 8  | 671.299495  | 336.153386 |             |            | 653.288930  | 327.148103 | S | 731.441014 | 366.224145 | 714.414465 | 357.710871 | 713.430449 | 357.2188 |
| 9  | 799.394458  | 400.200867 | 782.367909  | 391.687592 | 781.383893  | 391.195585 | K | 644.408986 | 322.708131 | 627.382437 | 314.194857 | 626.398421 | 313.7028 |
| 10 | 928.437051  | 464.722164 | 911.410502  | 456.208889 | 910.426486  | 455.716881 | E | 516.314023 | 258.660650 | 499.287474 | 250.147375 | 498.303458 | 249.6553 |
| 11 | 1041.521115 | 521.264196 | 1024.494566 | 512.750921 | 1023.510550 | 512.258913 | I | 387.271430 | 194.139353 | 370.244881 | 185.626079 |            |          |
| 12 | 1140.589529 | 570.798403 | 1123.562980 | 562.285128 | 1122.578964 | 561.793120 | V | 274.187366 | 137.597321 | 257.160817 | 129.084047 |            |          |
| 13 |             |            |             |            |             |            | R | 175.118952 | 88.063114  | 158.092403 | 79.549839  |            |          |

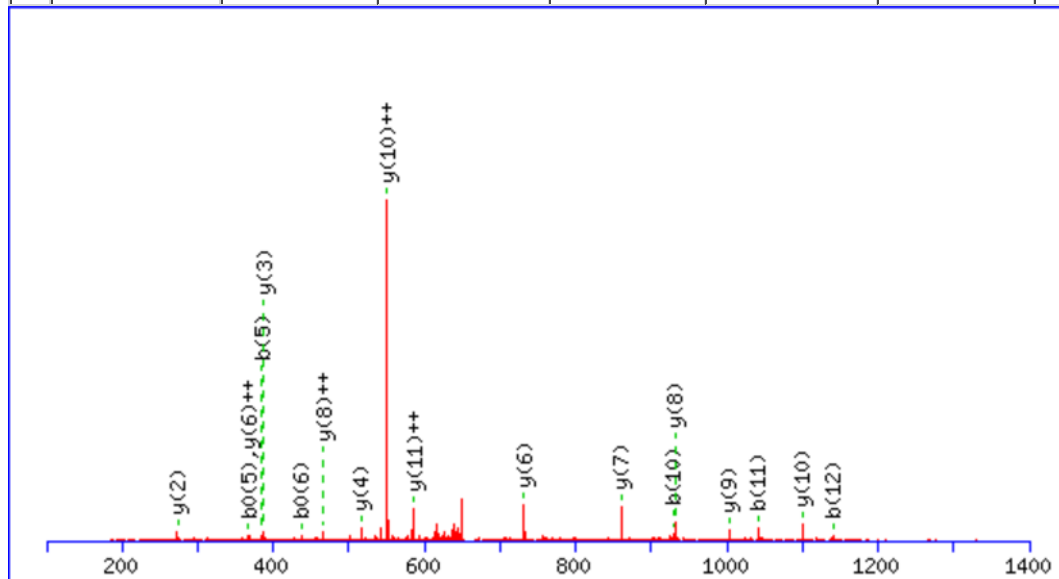

## Peptide View

MS/MS Fragmentation of **TFGQGTKLEIKR**

Found in **IPI00827643**, Tax\_Id=9606 Gene\_Symbol=- HRV Fab 027-VL (Fragment)

Experiment: 57 - PyD-3 Fraction: PyD-3

Match to Query 9007: 1376.778448 from(689.396500,2+)

Title: OECHL100317\_37.8370.8370.2.dta



Data file \\Boromir\masse\Data LTQ-Orbitrap\Chrystelle Lacroix\Etude clinique sJPU\OECHL100317\_37.raw

**Monoisotopic mass of neutral peptide Mr(cal):** 1376.777588**Fixed modifications:** Carbamidomethyl (C) (apply to specified residues or termini only)**Ions****Score:** 63 **Expect:** 1.8e-005**Matches :** 28/120 fragment ions using 36 most intense peaks ([help](#))

| #  | b                  | b <sup>++</sup> | b*                | b* <sup>++</sup>  | b <sup>0</sup>    | b <sup>0++</sup>  | Seq. | y                  | y <sup>++</sup>   | y*                 | y* <sup>++</sup>  | y <sup>0</sup> | y <sup>0++</sup> |
|----|--------------------|-----------------|-------------------|-------------------|-------------------|-------------------|------|--------------------|-------------------|--------------------|-------------------|----------------|------------------|
| 1  | 102.054955         | 51.531116       |                   |                   | 84.044390         | 42.525833         | T    |                    |                   |                    |                   |                |                  |
| 2  | <b>249.123369</b>  | 125.065322      |                   |                   | 231.112804        | 116.060040        | F    | 1276.737198        | 638.872237        | 1259.710649        | 630.358963        | 1258.726633    | 629.8669         |
| 3  | 306.144833         | 153.576054      |                   |                   | <b>288.134268</b> | 144.570772        | G    | <b>1129.668784</b> | <b>565.338030</b> | <b>1112.642235</b> | <b>556.824756</b> | 1111.658219    | <b>556.3327</b>  |
| 4  | 434.203411         | 217.605343      | 417.176862        | 209.092069        | <b>416.192846</b> | 208.600061        | Q    | <b>1072.647320</b> | 536.827298        | 1055.620771        | 528.314024        | 1054.636755    | 527.8220         |
| 5  | 491.224875         | 246.116075      | 474.198326        | 237.602801        | <b>473.214310</b> | 237.110793        | G    | <b>944.588742</b>  | <b>472.798009</b> | 927.562193         | 464.284735        | 926.578177     | 463.7927         |
| 6  | 592.272554         | 296.639915      | 575.246005        | <b>288.126641</b> | 574.261989        | 287.634633        | T    | <b>887.567278</b>  | 444.287277        | 870.540729         | 435.774003        | 869.556713     | 435.2819         |
| 7  | <b>720.367517</b>  | 360.687397      | 703.340968        | 352.174122        | 702.356952        | 351.682114        | K    | <b>786.519599</b>  | 393.763438        | 769.493050         | 385.250163        | 768.509034     | 384.7581         |
| 8  | <b>833.451581</b>  | 417.229429      | 816.425032        | 408.716154        | 815.441016        | 408.224146        | L    | <b>658.424636</b>  | 329.715956        | 641.398087         | 321.202682        | 640.414071     | 320.7106         |
| 9  | <b>962.494174</b>  | 481.750725      | <b>945.467625</b> | <b>473.237451</b> | <b>944.483609</b> | <b>472.745443</b> | E    | <b>545.340572</b>  | 273.173924        | 528.314023         | 264.660650        | 527.330007     | 264.1686         |
| 10 | <b>1075.578238</b> | 538.292757      | 1058.551689       | 529.779483        | 1057.567673       | 529.287475        | I    | <b>416.297979</b>  | 208.652627        | 399.271430         | 200.139353        |                |                  |
| 11 | <b>1203.673201</b> | 602.340239      | 1186.646652       | 593.826964        | 1185.662636       | 593.334956        | K    | <b>303.213915</b>  | 152.110595        | 286.187366         | 143.597321        |                |                  |
| 12 |                    |                 |                   |                   |                   |                   | R    | 175.118952         | 88.063114         | 158.092403         | 79.549839         |                |                  |

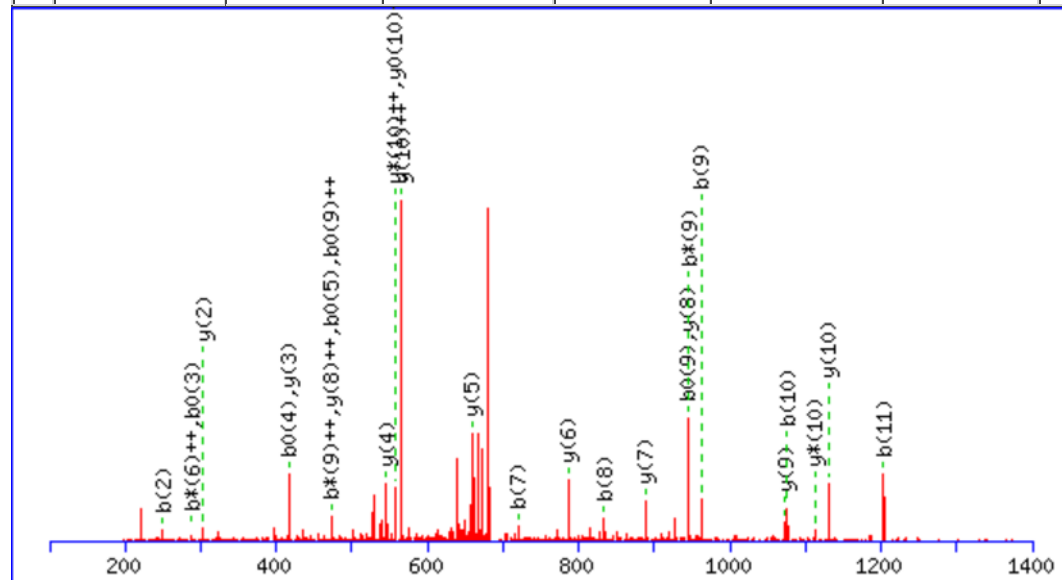

## Peptide View

MS/MS Fragmentation of **IGDKLDIICPR**

Found in **IPI00024307**, Tax\_Id=9606 Gene\_Symbol=EFNB1 Ephrin-B1

**Experiment:** 57 - PyD-3 **Fraction:** PyD-3

Match to Query 8200: 1298.700648 from(650.357600,2+)

Title: OECHL100317\_37.12246.12246.2.dta

Data file \\Boromir\masse\Data LTQ-Orbitrap\Chrystelle Lacroix\Etude clinique sJPU\OECHL100317\_37.raw

**Monoisotopic mass of neutral peptide Mr(calc):** 1298.701645 **Fixed modifications:** Carbamidomethyl (C) (apply to specified residues or termini only) **Ions**

**Score:** 62 **Expect:** 7.1e-005 **Matches :** 10/100 fragment ions using 11 most intense peaks ([help](#))

| #  | b                  | b <sup>++</sup> | b*          | b <sup>*++</sup> | b <sup>0</sup> | b <sup>0++</sup> | Seq. | y                  | y <sup>++</sup> | y*          | y <sup>*++</sup> | y <sup>0</sup>    | y <sup>0++</sup> |
|----|--------------------|-----------------|-------------|------------------|----------------|------------------|------|--------------------|-----------------|-------------|------------------|-------------------|------------------|
| 1  | 114.091340         | 57.549308       |             |                  |                |                  | I    |                    |                 |             |                  |                   |                  |
| 2  | 171.112804         | 86.060040       |             |                  |                |                  | G    | <b>1186.624870</b> | 593.816073      | 1169.598321 | 585.302799       | 1168.614305       | 584.8107         |
| 3  | 286.139747         | 143.573512      |             |                  | 268.129182     | 134.568229       | D    | 1129.603406        | 565.305341      | 1112.576857 | 556.792067       | 1111.592841       | 556.3000         |
| 4  | 414.234710         | 207.620993      | 397.208161  | 199.107719       | 396.224145     | 198.615711       | K    | 1014.576463        | 507.791870      | 997.549914  | 499.278595       | 996.565898        | 498.7865         |
| 5  | 527.318774         | 264.163025      | 510.292225  | 255.649751       | 509.308209     | 255.157743       | L    | <b>886.481500</b>  | 443.744388      | 869.454951  | 435.231113       | <b>868.470935</b> | 434.7391         |
| 6  | 642.345717         | 321.676497      | 625.319168  | 313.163222       | 624.335152     | 312.671214       | D    | <b>773.397436</b>  | 387.202356      | 756.370887  | 378.689081       | 755.386871        | 378.1970         |
| 7  | 755.429781         | 378.218529      | 738.403232  | 369.705254       | 737.419216     | 369.213246       | I    | <b>658.370493</b>  | 329.688885      | 641.343944  | 321.175610       |                   |                  |
| 8  | <b>868.513845</b>  | 434.760561      | 851.487296  | 426.247286       | 850.503280     | 425.755278       | I    | <b>545.286429</b>  | 273.146853      | 528.259880  | 264.633578       |                   |                  |
| 9  | <b>1028.544494</b> | 514.775885      | 1011.517945 | 506.262610       | 1010.533929    | 505.770603       | C    | <b>432.202365</b>  | 216.604820      | 415.175816  | 208.091546       |                   |                  |
| 10 | 1125.597258        | 563.302267      | 1108.570709 | 554.788993       | 1107.586693    | 554.296985       | P    | <b>272.171716</b>  | 136.589496      | 255.145167  | 128.076221       |                   |                  |
| 11 |                    |                 |             |                  |                |                  | R    | 175.118952         | 88.063114       | 158.092403  | 79.549839        |                   |                  |

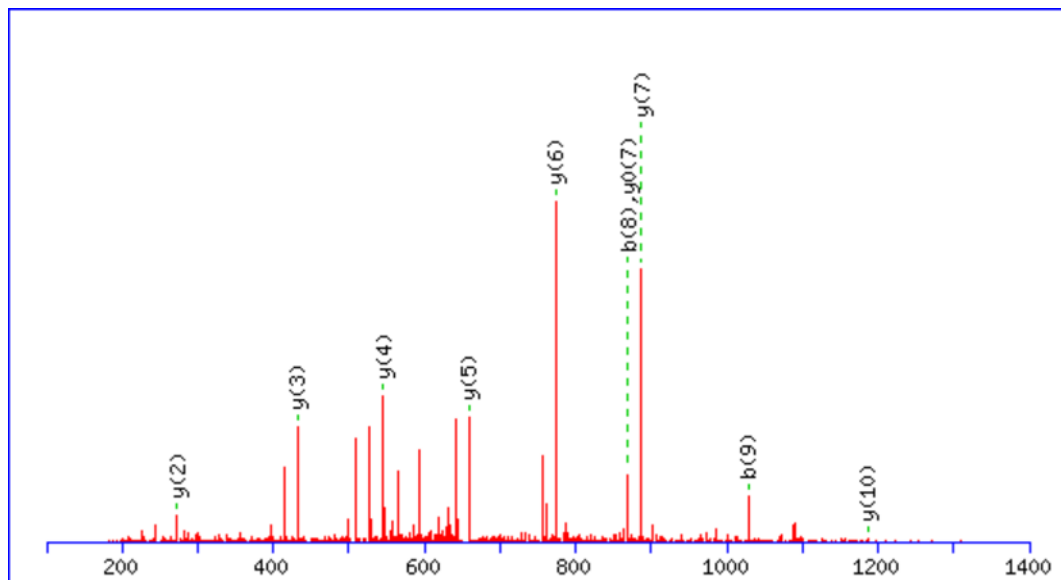

## Peptide View

MS/MS Fragmentation of **KGESGQSWPR**

Found in **IPI00015029**, Tax\_Id=9606 Gene\_Symbol=PTGES3 Prostaglandin E synthase 3

Experiment: 57 - PyD-3 Fraction: PyD-3

Match to Query 5659: 1130.545848 from(566.280200,2+)

Title: OECHL100317\_37.4223.4223.2.dta

Data file \\Boromir\masse\Data LTQ-Orbitrap\Chrystelle Lacroix\Etude clinique sJPU\OECHL100317\_37.raw

**Monoisotopic mass of neutral peptide Mr(calc): 1130.546860** Fixed modifications: Carbamidomethyl (C) (apply to specified residues or termini only) **Ions**

**Score: 65** **Expect: 3.2e-005** **Matches : 26/98** fragment ions using 46 most intense peaks ([help](#))

| # | b                 | b <sup>++</sup> | b*         | b <sup>*++</sup> | b <sup>0</sup>    | b <sup>0++</sup> | Seq.     | y                  | y <sup>++</sup> | y*                | y <sup>*++</sup>  | y <sup>0</sup>    | y <sup>0++</sup> | #         |
|---|-------------------|-----------------|------------|------------------|-------------------|------------------|----------|--------------------|-----------------|-------------------|-------------------|-------------------|------------------|-----------|
| 1 | 129.102239        | 65.054757       | 112.075690 | 56.541483        |                   |                  | <b>K</b> |                    |                 |                   |                   |                   |                  | <b>10</b> |
| 2 | <b>186.123703</b> | 93.565489       | 169.097154 | 85.052215        |                   |                  | <b>G</b> | <b>1003.459184</b> | 502.233230      | <b>986.432635</b> | 493.719956        | <b>985.448619</b> | 493.227948       | <b>9</b>  |
| 3 | <b>315.166296</b> | 158.086786      | 298.139747 | 149.573512       | <b>297.155731</b> | 149.081504       | <b>E</b> | <b>946.437720</b>  | 473.722498      | 929.411171        | 465.209224        | 928.427155        | 464.717216       | <b>8</b>  |
| 4 | 402.198324        | 201.602800      | 385.171775 | 193.089526       | <b>384.187759</b> | 192.597518       | <b>S</b> | <b>817.395127</b>  | 409.201202      | 800.368578        | 400.687927        | 799.384562        | 400.195919       | <b>7</b>  |
| 5 | <b>459.219788</b> | 230.113532      | 442.193239 | 221.600258       | 441.209223        | 221.108250       | <b>G</b> | <b>730.363099</b>  | 365.685188      | 713.336550        | <b>357.171913</b> | 712.352534        | 356.679905       | <b>6</b>  |

|    |                   |            |                   |            |                   |            |   |                   |                   |                   |            |            |            |   |
|----|-------------------|------------|-------------------|------------|-------------------|------------|---|-------------------|-------------------|-------------------|------------|------------|------------|---|
| 6  | <b>587.278366</b> | 294.142821 | 570.251817        | 285.629547 | 569.267801        | 285.137539 | Q | <b>673.341635</b> | 337.174456        | <b>656.315086</b> | 328.661181 | 655.331070 | 328.169173 | 5 |
| 7  | <b>674.310394</b> | 337.658835 | 657.283845        | 329.145560 | <b>656.299829</b> | 328.653552 | S | <b>545.283057</b> | <b>273.145167</b> | 528.256508        | 264.631892 | 527.272492 | 264.139884 | 4 |
| 8  | <b>860.389707</b> | 430.698492 | <b>843.363158</b> | 422.185217 | 842.379142        | 421.693209 | W | <b>458.251029</b> | 229.629153        | 441.224480        | 221.115878 |            |            | 3 |
| 9  | <b>957.442471</b> | 479.224874 | 940.415922        | 470.711599 | 939.431906        | 470.219591 | P | <b>272.171716</b> | 136.589496        | <b>255.145167</b> | 128.076221 |            |            | 2 |
| 10 |                   |            |                   |            |                   |            | R | <b>175.118952</b> | 88.063114         | 158.092403        | 79.549839  |            |            | 1 |

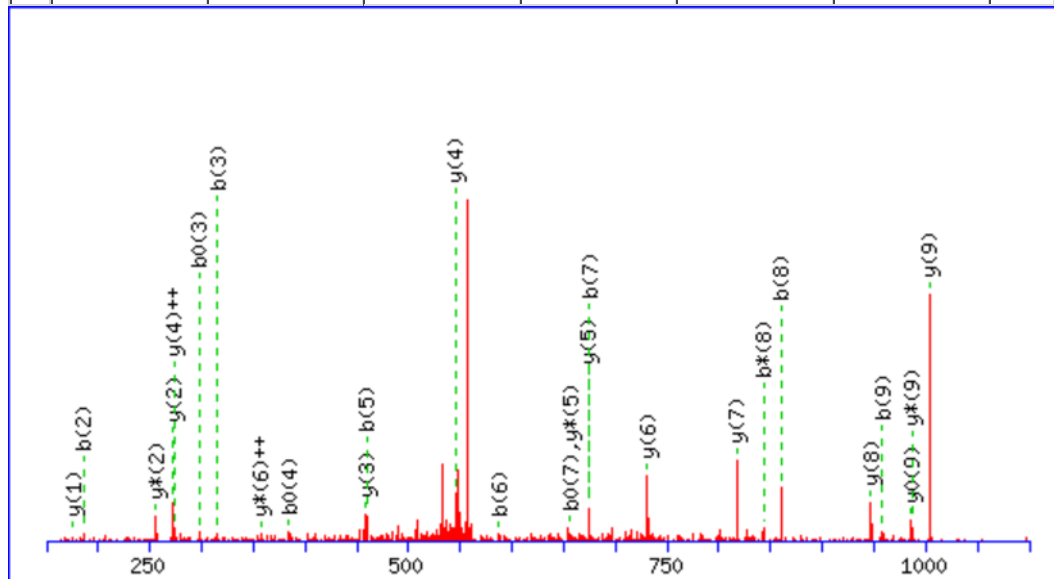

## Peptide View

MS/MS Fragmentation of **YSGSEGSTQTLTKGELK**

Found in **IPI00017526**, Tax\_Id=9606 Gene\_Symbol=S100P Protein S100-P

**Experiment:** 57 - PyD-3 **Fraction:** PyD-3

Match to Query 13263: 1784.879648 from(893.447100,2+)

Title: OECHL100317\_37.7902.7902.2.dta

Data file \\Boromir\masse\Data LTQ-Orbitrap\Chrystelle Lacroix\Etude clinique sJPU\OECHL100317\_37.raw

**Monoisotopic mass of neutral peptide Mr(calc):** 1784.879211 **Fixed modifications:** Carbamidomethyl (C) (apply to specified residues or termini only) **Ions**

**Score:** 60 **Expect:** 0.00017 **Matches :** 12/170 fragment ions using 16 most intense peaks ([help](#))

| # | b | b <sup>++</sup> | b <sup>*</sup> | b <sup>*++</sup> | b <sup>0</sup> | b <sup>0++</sup> | Seq. | y | y <sup>++</sup> | y <sup>*</sup> | y <sup>*++</sup> | y <sup>0</sup> | y <sup>0++</sup> |
|---|---|-----------------|----------------|------------------|----------------|------------------|------|---|-----------------|----------------|------------------|----------------|------------------|
|---|---|-----------------|----------------|------------------|----------------|------------------|------|---|-----------------|----------------|------------------|----------------|------------------|



## Peptide View

MS/MS Fragmentation of **GQLPISVTCTIADEIGAR**

Found in **IPI00240345**, Tax\_Id=9606 Gene\_Symbol=CLEC14A C-type lectin domain family 14 member A

Experiment: 57 - PyD-3 Fraction: PyD-3

Match to Query 13380: 1798.925848 from(900.470200,2+)

Title: OECHL100317\_37.20367.20367.2.dta

Data file \\Boromir\masse\Data LTQ-Orbitrap\Chrystelle Lacroix\Etude clinique sJPU\OECHL100317\_37.raw

**Monoisotopic mass of neutral peptide Mr(calc):** 1798.924728**Fixed modifications:** Carbamidomethyl (C) (apply to specified residues or termini only)**Ions**

**Score:** 63 **Expect:** 7.4e-005**Matches :** 28/172 fragment ions using 76 most intense peaks ([help](#))

| #  | b                  | b <sup>++</sup> | b*                | b* <sup>++</sup> | b <sup>0</sup>     | b <sup>0++</sup> | Seq. | y                  | y <sup>++</sup>   | y*          | y* <sup>++</sup> | y <sup>0</sup> | y <sup>0++</sup> |
|----|--------------------|-----------------|-------------------|------------------|--------------------|------------------|------|--------------------|-------------------|-------------|------------------|----------------|------------------|
| 1  | 58.028740          | 29.518008       |                   |                  |                    |                  | G    |                    |                   |             |                  |                |                  |
| 2  | 186.087318         | 93.547297       | 169.060769        | 85.034023        |                    |                  | Q    | 1742.910548        | 871.958912        | 1725.883999 | 863.445638       | 1724.899983    | 862.9536         |
| 3  | <b>299.171382</b>  | 150.089329      | 282.144833        | 141.576055       |                    |                  | L    | <b>1614.851970</b> | <b>807.929623</b> | 1597.825421 | 799.416349       | 1596.841405    | 798.9243         |
| 4  | <b>396.224146</b>  | 198.615711      | <b>379.197597</b> | 190.102436       |                    |                  | P    | <b>1501.767906</b> | <b>751.387591</b> | 1484.741357 | 742.874317       | 1483.757341    | 742.3823         |
| 5  | <b>509.308210</b>  | 255.157743      | 492.281661        | 246.644468       |                    |                  | I    | <b>1404.715142</b> | 702.861209        | 1387.688593 | 694.347935       | 1386.704577    | 693.8559         |
| 6  | <b>596.340238</b>  | 298.673757      | 579.313689        | 290.160483       | 578.329673         | 289.668475       | S    | <b>1291.631078</b> | 646.319177        | 1274.604529 | 637.805903       | 1273.620513    | 637.3138         |
| 7  | <b>695.408652</b>  | 348.207964      | 678.382103        | 339.694689       | 677.398087         | 339.202681       | V    | <b>1204.599050</b> | 602.803163        | 1187.572501 | 594.289889       | 1186.588485    | 593.7978         |
| 8  | <b>796.456331</b>  | 398.731804      | 779.429782        | 390.218529       | 778.445766         | 389.726521       | T    | <b>1105.530636</b> | 553.268956        | 1088.504087 | 544.755682       | 1087.520071    | 544.2636         |
| 9  | 956.486980         | 478.747128      | 939.460431        | 470.233854       | 938.476415         | 469.741846       | C    | <b>1004.482957</b> | 502.745117        | 987.456408  | 494.231842       | 986.472392     | 493.7398         |
| 10 | <b>1069.571044</b> | 535.289160      | 1052.544495       | 526.775886       | 1051.560479        | 526.283878       | I    | <b>844.452308</b>  | 422.729792        | 827.425759  | 414.216518       | 826.441743     | 413.7245         |
| 11 | 1140.608158        | 570.807717      | 1123.581609       | 562.294443       | 1122.597593        | 561.802435       | A    | <b>731.368244</b>  | 366.187760        | 714.341695  | 357.674486       | 713.357679     | 357.1824         |
| 12 | <b>1255.635101</b> | 628.321189      | 1238.608552       | 619.807914       | 1237.624536        | 619.315906       | D    | <b>660.331130</b>  | 330.669203        | 643.304581  | 322.155929       | 642.320565     | 321.6639         |
| 13 | <b>1384.677694</b> | 692.842485      | 1367.651145       | 684.329211       | <b>1366.667129</b> | 683.837203       | E    | <b>545.304187</b>  | 273.155732        | 528.277638  | 264.642457       | 527.293622     | 264.1504         |
| 14 | <b>1497.761758</b> | 749.384517      | 1480.735209       | 740.871243       | 1479.751193        | 740.379235       | I    | <b>416.261594</b>  | 208.634435        | 399.235045  | 200.121160       |                |                  |
| 15 | 1554.783222        | 777.895249      | 1537.756673       | 769.381975       | 1536.772657        | 768.889967       | G    | <b>303.177530</b>  | 152.092403        | 286.150981  | 143.579128       |                |                  |
| 16 | <b>1625.820336</b> | 813.413806      | 1608.793787       | 804.900532       | 1607.809771        | 804.408524       | A    | 246.156066         | 123.581671        | 229.129517  | 115.068396       |                |                  |
| 17 |                    |                 |                   |                  |                    |                  | R    | 175.118952         | 88.063114         | 158.092403  | 79.549839        |                |                  |

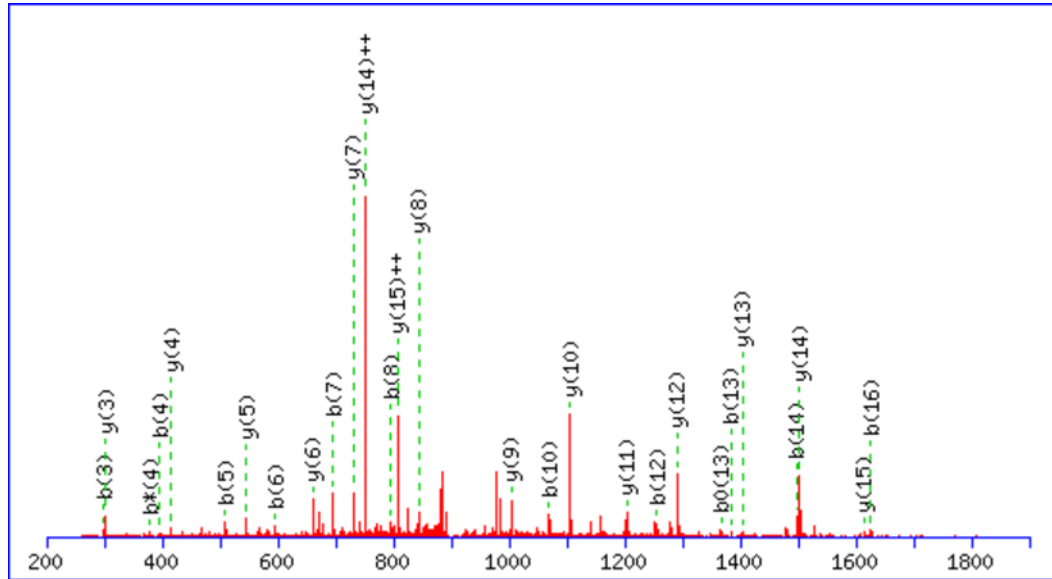

## Peptide View

MS/MS Fragmentation of **ASHPEDPASVVEAR**

Found in **IPI00296141**, Tax\_Id=9606 Gene\_Symbol=DPP7 Dipeptidyl-peptidase 2

**Experiment:** 57 - PyD-3 **Fraction:** PyD-3

Match to Query 9698: 1463.700448 from(732.857500,2+)

Title: OECHL100317\_37.8269.8269.2.dta

Data file \\Boromir\masse\Data LTQ-Orbitrap\Chrystelle Lacroix\Etude clinique sJPU\OECHL100317\_37.raw

**Monoisotopic mass of neutral peptide Mr(calc):** 1463.700455 **Fixed modifications:** Carbamidomethyl (C) (apply to specified residues or termini only) **Ions**

**Score:** 51 **Expect:** 0.00076 **Matches :** 12/124 fragment ions using 13 most intense peaks ([help](#))

| # | b                 | b <sup>++</sup> | b <sup>0</sup>    | b <sup>0++</sup> | Seq. | y                  | y <sup>++</sup>   | y <sup>*</sup> | y <sup>*++</sup> | y <sup>0</sup> | y <sup>0++</sup> | #  |
|---|-------------------|-----------------|-------------------|------------------|------|--------------------|-------------------|----------------|------------------|----------------|------------------|----|
| 1 | 72.044390         | 36.525833       |                   |                  | A    |                    |                   |                |                  |                |                  | 14 |
| 2 | 159.076418        | 80.041847       | 141.065853        | 71.036564        | S    | 1393.670633        | 697.338955        | 1376.644084    | 688.825680       | 1375.660068    | 688.333672       | 13 |
| 3 | <b>296.135330</b> | 148.571303      | 278.124765        | 139.566021       | H    | 1306.638605        | <b>653.822940</b> | 1289.612056    | 645.309666       | 1288.628040    | 644.817658       | 12 |
| 4 | 393.188094        | 197.097685      | <b>375.177529</b> | 188.092403       | P    | <b>1169.579693</b> | <b>585.293484</b> | 1152.553144    | 576.780210       | 1151.569128    | 576.288202       | 11 |
| 5 | 522.230687        | 261.618982      | 504.220122        | 252.613699       | E    | <b>1072.526929</b> | 536.767102        | 1055.500380    | 528.253828       | 1054.516364    | 527.761820       | 10 |

|    |             |            |             |            |   |            |            |            |            |            |            |   |
|----|-------------|------------|-------------|------------|---|------------|------------|------------|------------|------------|------------|---|
| 6  | 637.257630  | 319.132453 | 619.247065  | 310.127171 | D | 943.484336 | 472.245806 | 926.457787 | 463.732531 | 925.473771 | 463.240523 | 9 |
| 7  | 734.310394  | 367.658835 | 716.299829  | 358.653553 | P | 828.457393 | 414.732334 | 811.430844 | 406.219060 | 810.446828 | 405.727052 | 8 |
| 8  | 805.347508  | 403.177392 | 787.336943  | 394.172110 | A | 731.404629 | 366.205952 | 714.378080 | 357.692678 | 713.394064 | 357.200670 | 7 |
| 9  | 892.379536  | 446.693406 | 874.368971  | 437.688124 | S | 660.367515 | 330.687395 | 643.340966 | 322.174121 | 642.356950 | 321.682113 | 6 |
| 10 | 991.447950  | 496.227613 | 973.437385  | 487.222331 | V | 573.335487 | 287.171382 | 556.308938 | 278.658107 | 555.324922 | 278.166099 | 5 |
| 11 | 1090.516364 | 545.761820 | 1072.505799 | 536.756538 | V | 474.267073 | 237.637174 | 457.240524 | 229.123900 | 456.256508 | 228.631892 | 4 |
| 12 | 1219.558957 | 610.283117 | 1201.548392 | 601.277834 | E | 375.198659 | 188.102967 | 358.172110 | 179.589693 | 357.188094 | 179.097685 | 3 |
| 13 | 1290.596071 | 645.801673 | 1272.585506 | 636.796391 | A | 246.156066 | 123.581671 | 229.129517 | 115.068396 |            |            | 2 |
| 14 |             |            |             |            | R | 175.118952 | 88.063114  | 158.092403 | 79.549839  |            |            | 1 |

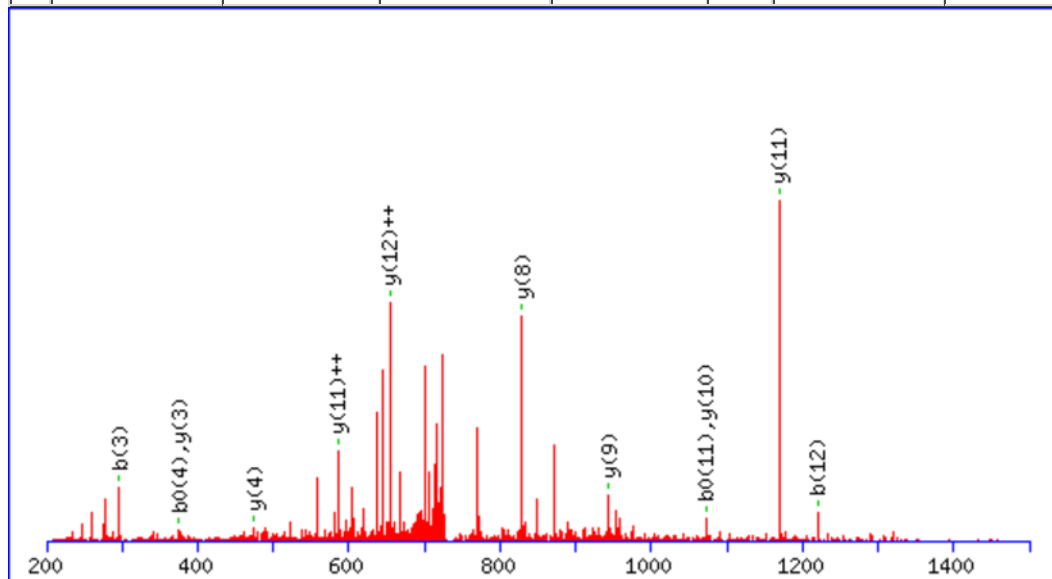

## Peptide View

MS/MS Fragmentation of **APVILGSPDDVLEFLK**

Found in **IPI00073772**, Tax\_Id=9606 Gene\_Symbol=FBP1 Fructose-1,6-bisphosphatase 1

Experiment: 57 - PyD-3 Fraction: PyD-3

Match to Query 12781: 1711.939448 from(856.977000,2+)



Title: OECHL100317\_37.22359.22359.2.dta

Data file \\Boromir\masse\Data LTQ-Orbitrap\Chrystelle Lacroix\Etude clinique sJPU\OECHL100317\_37.raw

**Monoisotopic mass of neutral peptide Mr(calc):** 1711.939636**Fixed modifications:** Carbamidomethyl (C) (apply to specified residues or termini only)**Ions****Score:** 58 **Expect:** 0.00011**Matches :** 31/132 fragment ions using 57 most intense peaks ([help](#))

| #  | <b>b</b>           | <b>b<sup>++</sup></b> | <b>b<sup>0</sup></b> | <b>b<sup>0++</sup></b> | <b>Seq.</b> | <b>y</b>           | <b>y<sup>++</sup></b> | <b>y*</b>          | <b>y<sup>*++</sup></b> | <b>y<sup>0</sup></b> | <b>y<sup>0++</sup></b> | #         |
|----|--------------------|-----------------------|----------------------|------------------------|-------------|--------------------|-----------------------|--------------------|------------------------|----------------------|------------------------|-----------|
| 1  | 72.044390          | 36.525833             |                      |                        | <b>A</b>    |                    |                       |                    |                        |                      |                        | <b>16</b> |
| 2  | 169.097154         | 85.052215             |                      |                        | <b>P</b>    | 1641.909801        | <b>821.458538</b>     | 1624.883252        | 812.945264             | 1623.899236          | 812.453256             | <b>15</b> |
| 3  | <b>268.165568</b>  | 134.586422            |                      |                        | <b>V</b>    | <b>1544.857037</b> | 772.932156            | 1527.830488        | 764.418882             | 1526.846472          | 763.926874             | <b>14</b> |
| 4  | <b>381.249632</b>  | 191.128454            |                      |                        | <b>I</b>    | <b>1445.788623</b> | <b>723.397949</b>     | <b>1428.762074</b> | <b>714.884675</b>      | 1427.778058          | <b>714.392667</b>      | <b>13</b> |
| 5  | <b>494.333696</b>  | 247.670486            |                      |                        | <b>L</b>    | <b>1332.704559</b> | 666.855917            | 1315.678010        | 658.342643             | 1314.693994          | 657.850635             | <b>12</b> |
| 6  | <b>551.355160</b>  | 276.181218            |                      |                        | <b>G</b>    | <b>1219.620495</b> | 610.313885            | 1202.593946        | 601.800611             | 1201.609930          | 601.308603             | <b>11</b> |
| 7  | <b>638.387188</b>  | 319.697232            | <b>620.376623</b>    | <b>310.691950</b>      | <b>S</b>    | <b>1162.599031</b> | 581.803153            | 1145.572482        | 573.289879             | 1144.588466          | 572.797871             | <b>10</b> |
| 8  | 735.439952         | 368.223614            | 717.429387           | 359.218332             | <b>P</b>    | <b>1075.567003</b> | 538.287139            | 1058.540454        | 529.773865             | 1057.556438          | 529.281857             | <b>9</b>  |
| 9  | 850.466895         | 425.737086            | 832.456330           | <b>416.731803</b>      | <b>D</b>    | <b>978.514239</b>  | 489.760757            | 961.487690         | 481.247483             | 960.503674           | 480.755475             | <b>8</b>  |
| 10 | <b>965.493838</b>  | 483.250557            | 947.483273           | 474.245274             | <b>D</b>    | 863.487296         | 432.247286            | 846.460747         | <b>423.734011</b>      | 845.476731           | <b>423.242003</b>      | <b>7</b>  |
| 11 | <b>1064.562252</b> | 532.784764            | 1046.551687          | <b>523.779481</b>      | <b>V</b>    | 748.460353         | 374.733814            | 731.433804         | 366.220540             | 730.449788           | 365.728532             | <b>6</b>  |
| 12 | 1177.646316        | 589.326796            | 1159.635751          | 580.321513             | <b>L</b>    | <b>649.391939</b>  | 325.199607            | 632.365390         | 316.686333             | 631.381374           | 316.194325             | <b>5</b>  |
| 13 | <b>1306.688909</b> | 653.848092            | 1288.678344          | 644.842810             | <b>E</b>    | 536.307875         | <b>268.657576</b>     | 519.281326         | 260.144301             | 518.297310           | 259.652293             | <b>4</b>  |
| 14 | <b>1453.757323</b> | 727.382299            | <b>1435.746758</b>   | 718.377017             | <b>F</b>    | 407.265282         | 204.136279            | 390.238733         | 195.623004             |                      |                        | <b>3</b>  |
| 15 | <b>1566.841387</b> | 783.924331            | 1548.830822          | 774.919049             | <b>L</b>    | 260.196868         | 130.602072            | 243.170319         | 122.088797             |                      |                        | <b>2</b>  |
| 16 |                    |                       |                      |                        | <b>K</b>    | 147.112804         | 74.060040             | 130.086255         | 65.546765              |                      |                        | <b>1</b>  |

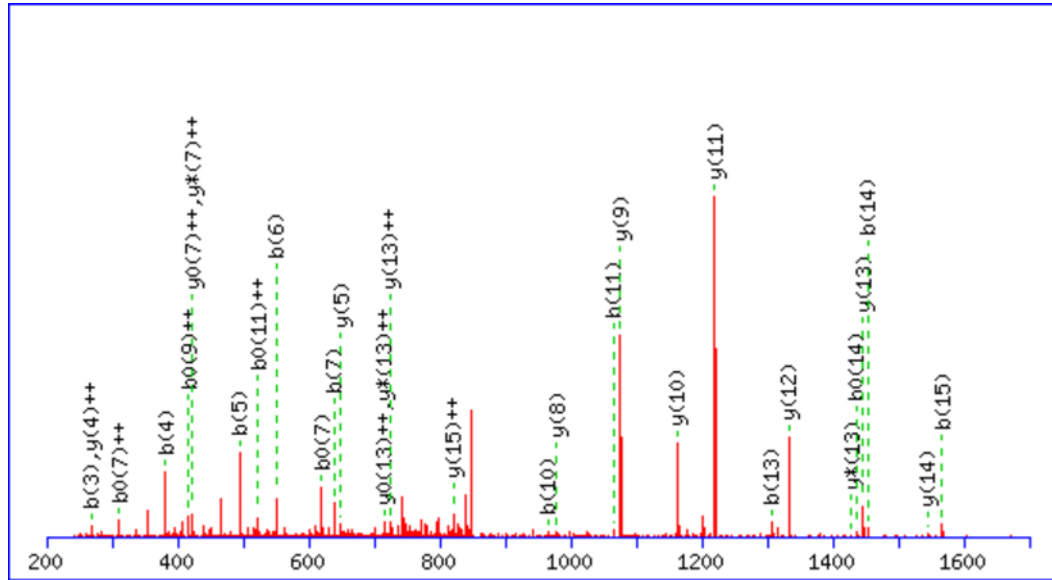

## Peptide View

MS/MS Fragmentation of **SCSSCVATDPDSIGAAHLIFCCFR**

Found in **IPI00022620**, Tax\_Id=9606 Gene\_Symbol=SLURP1 Secreted Ly-6/uPAR-related protein 1

**Experiment:** 57 - PyD-3 **Fraction:** PyD-3

Match to Query 18343: 2817.198072 from(940.073300,3+)

Title: OECHL100317\_37.19816.19816.3.dta

Data file \\Boromir\masse\Data LTQ-Orbitrap\Chrystelle Lacroix\Etude clinique sJPU\OECHL100317\_37.raw

**Monoisotopic mass of neutral peptide Mr(calc):** 2817.197922 **Fixed modifications:** Carbamidomethyl (C) (apply to specified residues or termini only) **Ions**

**Score:** 52 **Expect:** 0.00035 **Matches :** 19/216 fragment ions using 33 most intense peaks ([help](#))

| # | b                 | b <sup>++</sup> | b <sup>0</sup>    | b <sup>0++</sup> | Seq. | y           | y <sup>++</sup>    | y <sup>*</sup> | y <sup>*++</sup> | y <sup>0</sup> | y <sup>0++</sup> | #  |
|---|-------------------|-----------------|-------------------|------------------|------|-------------|--------------------|----------------|------------------|----------------|------------------|----|
| 1 | 88.039304         | 44.523290       | 70.028739         | 35.518008        | S    |             |                    |                |                  |                |                  | 25 |
| 2 | 248.069953        | 124.538614      | 230.059388        | 115.533332       | C    | 2731.173141 | 1366.090208        | 2714.146592    | 1357.576934      | 2713.162576    | 1357.084926      | 24 |
| 3 | <b>335.101981</b> | 168.054628      | 317.091416        | 159.049346       | S    | 2571.142492 | <b>1286.074884</b> | 2554.115943    | 1277.561609      | 2553.131927    | 1277.069601      | 23 |
| 4 | <b>422.134009</b> | 211.570642      | <b>404.123444</b> | 202.565360       | S    | 2484.110464 | <b>1242.558870</b> | 2467.083915    | 1234.045595      | 2466.099899    | 1233.553587      | 22 |
| 5 | 509.166037        | 255.086656      | 491.155472        | 246.081374       | S    | 2397.078436 | <b>1199.042856</b> | 2380.051887    | 1190.529581      | 2379.067871    | 1190.037573      | 21 |

|           |                   |                   |                   |             |          |                    |                    |                    |             |             |             |           |
|-----------|-------------------|-------------------|-------------------|-------------|----------|--------------------|--------------------|--------------------|-------------|-------------|-------------|-----------|
| <b>6</b>  | 669.196686        | <b>335.101981</b> | 651.186121        | 326.096699  | <b>C</b> | 2310.046408        | <b>1155.526842</b> | 2293.019859        | 1147.013567 | 2292.035843 | 1146.521559 | <b>20</b> |
| <b>7</b>  | 768.265100        | 384.636188        | <b>750.254535</b> | 375.630905  | <b>V</b> | 2150.015759        | <b>1075.511517</b> | 2132.989210        | 1066.998243 | 2132.005194 | 1066.506235 | <b>19</b> |
| <b>8</b>  | <b>839.302214</b> | 420.154745        | 821.291649        | 411.149462  | <b>A</b> | 2050.947345        | <b>1025.977310</b> | 2033.920796        | 1017.464036 | 2032.936780 | 1016.972028 | <b>18</b> |
| <b>9</b>  | 940.349893        | 470.678585        | 922.339328        | 461.673302  | <b>T</b> | 1979.910231        | <b>990.458753</b>  | 1962.883682        | 981.945479  | 1961.899666 | 981.453471  | <b>17</b> |
| <b>10</b> | 1055.376836       | 528.192056        | 1037.366271       | 519.186773  | <b>D</b> | 1878.862552        | 939.934914         | 1861.836003        | 931.421639  | 1860.851987 | 930.929631  | <b>16</b> |
| <b>11</b> | 1152.429600       | 576.718438        | 1134.419035       | 567.713155  | <b>P</b> | <b>1763.835609</b> | <b>882.421442</b>  | 1746.809060        | 873.908168  | 1745.825044 | 873.416160  | <b>15</b> |
| <b>12</b> | 1267.456543       | 634.231910        | 1249.445978       | 625.226627  | <b>D</b> | 1666.782845        | 833.895060         | <b>1649.756296</b> | 825.381786  | 1648.772280 | 824.889778  | <b>14</b> |
| <b>13</b> | 1354.488571       | 677.747924        | 1336.478006       | 668.742641  | <b>S</b> | <b>1551.755902</b> | <b>776.381589</b>  | 1534.729353        | 767.868314  | 1533.745337 | 767.376306  | <b>13</b> |
| <b>14</b> | 1467.572635       | 734.289956        | 1449.562070       | 725.284673  | <b>I</b> | 1464.723874        | 732.865575         | 1447.697325        | 724.352300  |             |             | <b>12</b> |
| <b>15</b> | 1524.594099       | 762.800687        | 1506.583534       | 753.795405  | <b>G</b> | 1351.639810        | <b>676.323543</b>  | 1334.613261        | 667.810268  |             |             | <b>11</b> |
| <b>16</b> | 1595.631213       | 798.319244        | 1577.620648       | 789.313962  | <b>A</b> | 1294.618346        | 647.812811         | 1277.591797        | 639.299536  |             |             | <b>10</b> |
| <b>17</b> | 1666.668327       | 833.837801        | 1648.657762       | 824.832519  | <b>A</b> | 1223.581232        | 612.294254         | 1206.554683        | 603.780979  |             |             | <b>9</b>  |
| <b>18</b> | 1803.727239       | 902.367257        | 1785.716674       | 893.361975  | <b>H</b> | 1152.544118        | 576.775697         | 1135.517569        | 568.262422  |             |             | <b>8</b>  |
| <b>19</b> | 1916.811303       | 958.909289        | 1898.800738       | 949.904007  | <b>L</b> | 1015.485206        | 508.246241         | 998.458657         | 499.732966  |             |             | <b>7</b>  |
| <b>20</b> | 2029.895367       | 1015.451321       | 2011.884802       | 1006.446039 | <b>I</b> | 902.401142         | 451.704209         | 885.374593         | 443.190934  |             |             | <b>6</b>  |
| <b>21</b> | 2176.963781       | 1088.985528       | 2158.953216       | 1079.980246 | <b>F</b> | 789.317078         | 395.162177         | 772.290529         | 386.648902  |             |             | <b>5</b>  |
| <b>22</b> | 2336.994430       | 1169.000853       | 2318.983865       | 1159.995570 | <b>C</b> | 642.248664         | 321.627970         | 625.222115         | 313.114695  |             |             | <b>4</b>  |
| <b>23</b> | 2497.025079       | 1249.016177       | 2479.014514       | 1240.010895 | <b>C</b> | 482.218015         | 241.612645         | 465.191466         | 233.099371  |             |             | <b>3</b>  |
| <b>24</b> | 2644.093493       | 1322.550384       | 2626.082928       | 1313.545102 | <b>F</b> | 322.187366         | 161.597321         | 305.160817         | 153.084046  |             |             | <b>2</b>  |
| <b>25</b> |                   |                   |                   |             | <b>R</b> | 175.118952         | 88.063114          | 158.092403         | 79.549839   |             |             | <b>1</b>  |

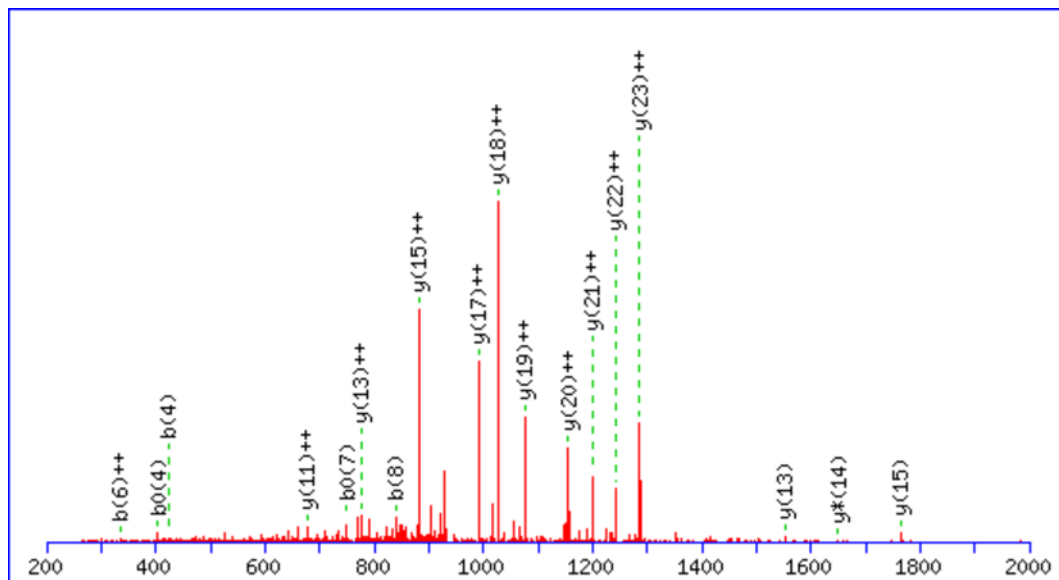

## Peptide View

MS/MS Fragmentation of **CQCPAGAALQADGR**

Found in **IPI00010737**, Tax\_Id=9606 Gene\_Symbol=THBD Thrombomodulin

**Experiment:** 57 - PyD-3 **Fraction:** PyD-3

Match to Query 9904: 1473.646648 from(737.830600,2+)

Title: OECHL100317\_37.7833.7833.2.dta

Data file \\Boromir\masse\Data LTQ-Orbitrap\Chrystelle Lacroix\Etude clinique sJPU\OECHL100317\_37.raw

**Monoisotopic mass of neutral peptide Mr(calc):** 1473.645279 **Fixed modifications:** Carbamidomethyl (C) (apply to specified residues or termini only) **Ions**

**Score:** 51 **Expect:** 0.00041 **Matches :** 20/128 fragment ions using 39 most intense peaks ([help](#))

| # | b                 | b <sup>++</sup> | b <sup>*</sup>    | b <sup>*++</sup> | b <sup>0</sup> | b <sup>0++</sup> | Seq. | y                  | y <sup>++</sup>   | y <sup>*</sup> | y <sup>*++</sup> | y <sup>0</sup> | y <sup>0++</sup> |
|---|-------------------|-----------------|-------------------|------------------|----------------|------------------|------|--------------------|-------------------|----------------|------------------|----------------|------------------|
| 1 | 161.037925        | 81.022600       |                   |                  |                |                  | C    |                    |                   |                |                  |                |                  |
| 2 | <b>289.096503</b> | 145.051890      | <b>272.069954</b> | 136.538615       |                |                  | Q    | 1314.621912        | 657.814594        | 1297.595363    | 649.301320       | 1296.611347    | 648.8093         |
| 3 | <b>449.127152</b> | 225.067214      | 432.100603        | 216.553940       |                |                  | C    | <b>1186.563334</b> | <b>593.785305</b> | 1169.536785    | 585.272031       | 1168.552769    | 584.7800         |
| 4 | <b>546.179916</b> | 273.593596      | 529.153367        | 265.080322       |                |                  | P    | <b>1026.532685</b> | 513.769981        | 1009.506136    | 505.256706       | 1008.522120    | 504.7646         |
| 5 | 617.217030        | 309.112153      | 600.190481        | 300.598879       |                |                  | A    | <b>929.479921</b>  | 465.243599        | 912.453372     | 456.730324       | 911.469356     | 456.2383         |

|    |             |            |             |            |             |            |   |            |            |            |            |            |          |
|----|-------------|------------|-------------|------------|-------------|------------|---|------------|------------|------------|------------|------------|----------|
| 6  | 674.238494  | 337.622885 | 657.211945  | 329.109611 |             |            | G | 858.442807 | 429.725042 | 841.416258 | 421.211767 | 840.432242 | 420.7197 |
| 7  | 745.275608  | 373.141442 | 728.249059  | 364.628168 |             |            | A | 801.421343 | 401.214310 | 784.394794 | 392.701035 | 783.410778 | 392.2090 |
| 8  | 816.312722  | 408.659999 | 799.286173  | 400.146725 |             |            | A | 730.384229 | 365.695753 | 713.357680 | 357.182478 | 712.373664 | 356.6904 |
| 9  | 929.396786  | 465.202031 | 912.370237  | 456.688757 |             |            | L | 659.347115 | 330.177196 | 642.320566 | 321.663921 | 641.336550 | 321.1719 |
| 10 | 1057.455364 | 529.231320 | 1040.428815 | 520.718046 |             |            | Q | 546.263051 | 273.635164 | 529.236502 | 265.121889 | 528.252486 | 264.6298 |
| 11 | 1128.492478 | 564.749877 | 1111.465929 | 556.236603 |             |            | A | 418.204473 | 209.605874 | 401.177924 | 201.092600 | 400.193908 | 200.6005 |
| 12 | 1243.519421 | 622.263349 | 1226.492872 | 613.750074 | 1225.508856 | 613.258066 | D | 347.167359 | 174.087317 | 330.140810 | 165.574043 | 329.156794 | 165.0820 |
| 13 | 1300.540885 | 650.774081 | 1283.514336 | 642.260806 | 1282.530320 | 641.768798 | G | 232.140416 | 116.573846 | 215.113867 | 108.060571 |            |          |
| 14 |             |            |             |            |             |            | R | 175.118952 | 88.063114  | 158.092403 | 79.549839  |            |          |

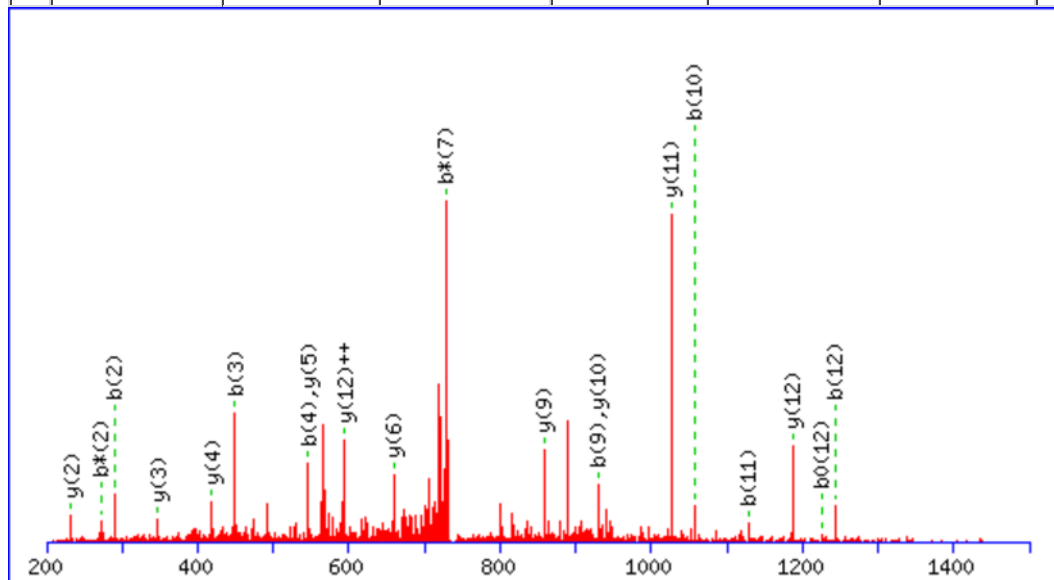

## Peptide View

MS/MS Fragmentation of **EIVLTQSPATLSLSPGER**

Found in **IPI00816799**, Tax\_Id=9606 Gene\_Symbol=- Rheumatoid factor D5 light chain (Fragment)

Experiment: 30 - NOPE3 Fraction: NOPE3

Match to Query 13470: 1897.019648 from(949.517100,2+)

Title: OECHL100317\_35.16820.16820.2.dta

Data file \\Boromir\masse\Data LTQ-Orbitrap\Chrystelle Lacroix\Etude clinique sJPU\OECHL100317\_35.raw

**Monoisotopic mass of neutral peptide Mr(calc):** 1897.015640**Fixed modifications:** Carbamidomethyl (C) (apply to specified residues or termini only)**Ions****Score:** 80 **Expect:** 8.7e-007**Matches :** 37/192 fragment ions using 64 most intense peaks ([help](#))

| #  | b                  | b <sup>++</sup>   | b*          | b <sup>*++</sup>  | b <sup>0</sup>     | b <sup>0++</sup> | Seq. | y                  | y <sup>++</sup>   | y*          | y <sup>*++</sup>  | y <sup>0</sup>    | y <sup>0++</sup> |
|----|--------------------|-------------------|-------------|-------------------|--------------------|------------------|------|--------------------|-------------------|-------------|-------------------|-------------------|------------------|
| 1  | 130.049869         | 65.528572         |             |                   | 112.039304         | 56.523290        | E    |                    |                   |             |                   |                   |                  |
| 2  | 243.133933         | 122.070605        |             |                   | 225.123368         | 113.065322       | I    | 1768.980341        | 884.993808        | 1751.953792 | 876.480534        | 1750.969776       | 875.9885         |
| 3  | <b>342.202347</b>  | 171.604812        |             |                   | <b>324.191782</b>  | 162.599529       | V    | <b>1655.896277</b> | 828.451776        | 1638.869728 | <b>819.938502</b> | 1637.885712       | <b>819.4464</b>  |
| 4  | <b>455.286411</b>  | 228.146844        |             |                   | 437.275846         | 219.141561       | L    | <b>1556.827863</b> | <b>778.917569</b> | 1539.801314 | 770.404295        | 1538.817298       | 769.9122         |
| 5  | <b>556.334090</b>  | 278.670683        |             |                   | 538.323525         | 269.665401       | T    | <b>1443.743799</b> | 722.375537        | 1426.717250 | 713.862263        | 1425.733234       | 713.3702         |
| 6  | 684.392668         | <b>342.699972</b> | 667.366119  | 334.186698        | <b>666.382103</b>  | 333.694690       | Q    | <b>1342.696120</b> | 671.851698        | 1325.669571 | 663.338423        | 1324.685555       | 662.8464         |
| 7  | <b>771.424696</b>  | 386.215986        | 754.398147  | 377.702712        | <b>753.414131</b>  | 377.210704       | S    | <b>1214.637542</b> | 607.822409        | 1197.610993 | 599.309134        | 1196.626977       | 598.8171         |
| 8  | 868.477460         | 434.742368        | 851.450911  | <b>426.229094</b> | 850.466895         | 425.737086       | P    | <b>1127.605514</b> | <b>564.306395</b> | 1110.578965 | 555.793120        | 1109.594949       | 555.3011         |
| 9  | 939.514574         | 470.260925        | 922.488025  | 461.747651        | 921.504009         | 461.255643       | A    | 1030.552750        | 515.780013        | 1013.526201 | 507.266738        | 1012.542185       | 506.7747         |
| 10 | <b>1040.562253</b> | 520.784765        | 1023.535704 | 512.271490        | 1022.551688        | 511.779482       | T    | <b>959.515636</b>  | 480.261456        | 942.489087  | 471.748181        | 941.505071        | 471.2561         |
| 11 | <b>1153.646317</b> | 577.326797        | 1136.619768 | 568.813522        | <b>1135.635752</b> | 568.321514       | L    | <b>858.467957</b>  | 429.737616        | 841.441408  | 421.224342        | 840.457392        | 420.7323         |
| 12 | <b>1240.678345</b> | 620.842811        | 1223.651796 | 612.329536        | <b>1222.667780</b> | 611.837528       | S    | <b>745.383893</b>  | 373.195585        | 728.357344  | 364.682310        | 727.373328        | 364.1903         |
| 13 | <b>1353.762409</b> | 677.384842        | 1336.735860 | 668.871568        | <b>1335.751844</b> | 668.379560       | L    | <b>658.351865</b>  | 329.679570        | 641.325316  | 321.166296        | 640.341300        | 320.6742         |
| 14 | <b>1440.794437</b> | 720.900857        | 1423.767888 | 712.387582        | <b>1422.783872</b> | 711.895574       | S    | <b>545.267801</b>  | 273.137539        | 528.241252  | 264.624264        | <b>527.257236</b> | 264.1322         |
| 15 | 1537.847201        | 769.427239        | 1520.820652 | 760.913964        | 1519.836636        | 760.421956       | P    | <b>458.235773</b>  | 229.621524        | 441.209224  | 221.108250        | 440.225208        | 220.6162         |
| 16 | 1594.868665        | 797.937971        | 1577.842116 | 789.424696        | 1576.858100        | 788.932688       | G    | <b>361.183009</b>  | 181.095142        | 344.156460  | 172.581868        | 343.172444        | 172.0898         |
| 17 | <b>1723.911258</b> | 862.459267        | 1706.884709 | 853.945992        | 1705.900693        | 853.453984       | E    | 304.161545         | 152.584410        | 287.134996  | 144.071136        | 286.150980        | 143.5791         |
| 18 |                    |                   |             |                   |                    |                  | R    | 175.118952         | 88.063114         | 158.092403  | 79.549839         |                   |                  |

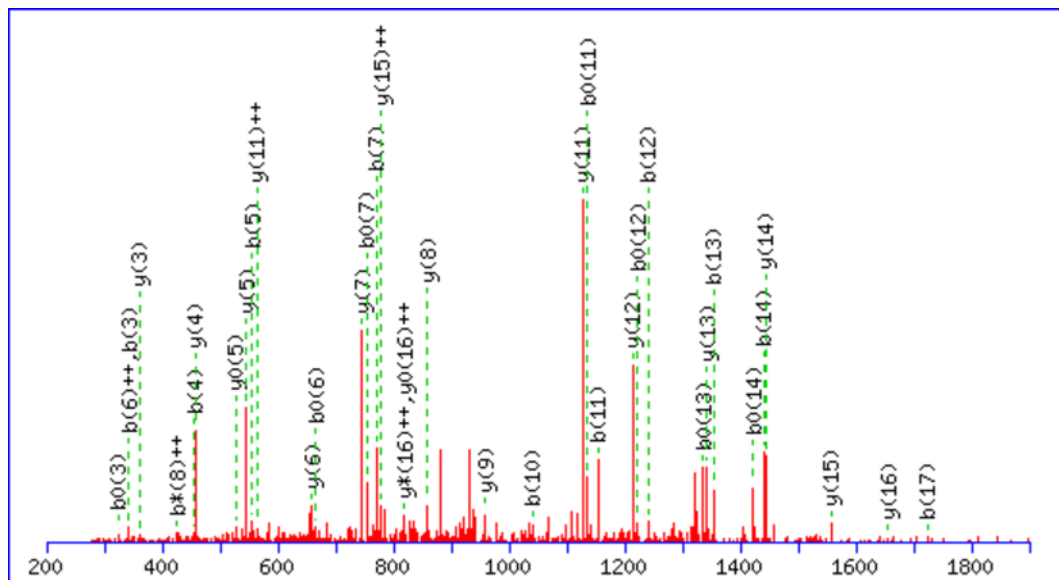

## Peptide View

MS/MS Fragmentation of **HSFKGEECPAGSHR**

Found in **IPI00021970**, Tax\_Id=9606 Gene\_Symbol=MGC31957;TNFRSF10C TNFRSF10C protein

**Experiment:** 30 - NOPE3 **Fraction:** NOPE3

Match to Query 10578: 1597.705648 from(799.860100,2+)

Title: OECHL100317\_35.2223.2223.2.dta

Data file \\Boromir\masse\Data LTQ-Orbitrap\Chrystelle Lacroix\Etude clinique sJPU\OECHL100317\_35.raw

**Monoisotopic mass of neutral peptide Mr(calc):** 1597.705566 **Fixed modifications:** Carbamidomethyl (C) (apply to specified residues or termini only) **Ions**

**Score:** 91 **Expect:** 5e-008 **Matches :** 39/144 fragment ions using 54 most intense peaks ([help](#))

| # | b                 | b <sup>++</sup> | b <sup>*</sup>    | b <sup>*++</sup> | b <sup>0</sup>    | b <sup>0++</sup> | Seq. | y                  | y <sup>++</sup>   | y <sup>*</sup> | y <sup>*++</sup>  | y <sup>0</sup> | y <sup>0++</sup> |
|---|-------------------|-----------------|-------------------|------------------|-------------------|------------------|------|--------------------|-------------------|----------------|-------------------|----------------|------------------|
| 1 | 138.066188        | 69.536732       |                   |                  |                   |                  | H    |                    |                   |                |                   |                |                  |
| 2 | <b>225.098216</b> | 113.052746      |                   |                  | 207.087651        | 104.047463       | S    | <b>1461.653938</b> | <b>731.330607</b> | 1444.627389    | <b>722.817333</b> | 1443.643373    | <b>722.3253</b>  |
| 3 | <b>372.166630</b> | 186.586953      |                   |                  | <b>354.156065</b> | 177.581671       | F    | <b>1374.621910</b> | <b>687.814593</b> | 1357.595361    | 679.301319        | 1356.611345    | 678.8093         |
| 4 | <b>500.261593</b> | 250.634435      | <b>483.235044</b> | 242.121160       | <b>482.251028</b> | 241.629152       | K    | <b>1227.553496</b> | <b>614.280386</b> | 1210.526947    | <b>605.767112</b> | 1209.542931    | <b>605.2751</b>  |
| 5 | 557.283057        | 279.145167      | 540.256508        | 270.631892       | <b>539.272492</b> | 270.139884       | G    | <b>1099.458533</b> | 550.232905        | 1082.431984    | 541.719630        | 1081.447968    | 541.2276         |

|    |                    |            |             |                   |                    |                   |   |                    |                   |             |            |                   |          |
|----|--------------------|------------|-------------|-------------------|--------------------|-------------------|---|--------------------|-------------------|-------------|------------|-------------------|----------|
| 6  | <b>686.325650</b>  | 343.666463 | 669.299101  | 335.153189        | 668.315085         | 334.661181        | E | <b>1042.437069</b> | 521.722173        | 1025.410520 | 513.208898 | 1024.426504       | 512.7168 |
| 7  | 815.368243         | 408.187760 | 798.341694  | <b>399.674485</b> | 797.357678         | <b>399.182477</b> | E | <b>913.394476</b>  | 457.200876        | 896.367927  | 448.687602 | <b>895.383911</b> | 448.1955 |
| 8  | <b>975.398892</b>  | 488.203084 | 958.372343  | 479.689810        | <b>957.388327</b>  | 479.197802        | C | <b>784.351883</b>  | 392.679580        | 767.325334  | 384.166305 | 766.341318        | 383.6742 |
| 9  | 1072.451656        | 536.729466 | 1055.425107 | 528.216192        | 1054.441091        | <b>527.724184</b> | P | <b>624.321234</b>  | <b>312.664255</b> | 607.294685  | 304.150981 | 606.310669        | 303.6589 |
| 10 | <b>1143.488770</b> | 572.248023 | 1126.462221 | 563.734749        | 1125.478205        | 563.242741        | A | <b>527.268470</b>  | 264.137873        | 510.241921  | 255.624598 | 509.257905        | 255.1325 |
| 11 | <b>1200.510234</b> | 600.758755 | 1183.483685 | 592.245481        | 1182.499669        | 591.753473        | G | <b>456.231356</b>  | 228.619316        | 439.204807  | 220.106041 | 438.220791        | 219.6140 |
| 12 | <b>1287.542262</b> | 644.274769 | 1270.515713 | 635.761495        | 1269.531697        | 635.269487        | S | <b>399.209892</b>  | 200.108584        | 382.183343  | 191.595309 | 381.199327        | 191.1033 |
| 13 | <b>1424.601174</b> | 712.804225 | 1407.574625 | 704.290951        | <b>1406.590609</b> | 703.798943        | H | <b>312.177864</b>  | 156.592570        | 295.151315  | 148.079295 |                   |          |
| 14 |                    |            |             |                   |                    |                   | R | 175.118952         | 88.063114         | 158.092403  | 79.549839  |                   |          |

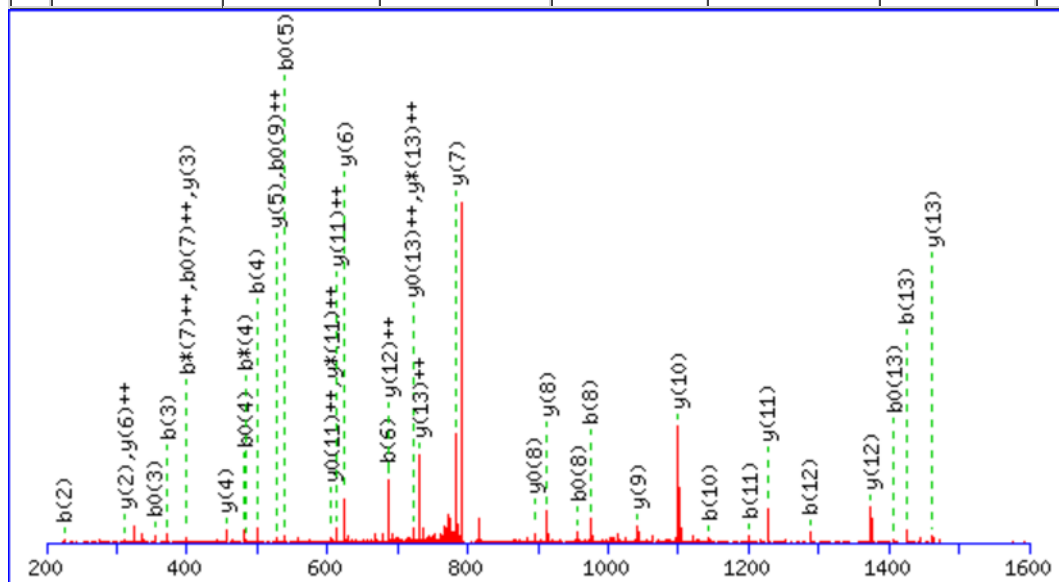

## Peptide View

MS/MS Fragmentation of **GKIEEDSEVLMMIK**

Found in **IPI00034319**, Tax\_Id=9606 Gene\_Symbol=CUTA Isoform A of Protein CutA

Experiment: 30 - NOPE3 Fraction: NOPE3

Match to Query 10755: 1620.811848 from(811.413200,2+)



Title: OECHL100317\_35.17095.17095.2.dta

Data file \\Boromir\masse\Data LTQ-Orbitrap\Chrystelle Lacroix\Etude clinique sJPU\OECHL100317\_35.raw

**Monoisotopic mass of neutral peptide Mr(calc):** 1620.810242**Fixed modifications:** Carbamidomethyl (C) (apply to specified residues or termini only)**Ions****Score:** 83 **Expect:** 7e-007**Matches :** 27/136 fragment ions using 42 most intense peaks ([help](#))

| #  | b                  | b <sup>++</sup> | b*                 | b <sup>*++</sup>  | b <sup>0</sup>    | b <sup>0++</sup>  | Seq. | y                  | y <sup>++</sup> | y*                 | y <sup>*++</sup> | y <sup>0</sup> | y <sup>0++</sup> |
|----|--------------------|-----------------|--------------------|-------------------|-------------------|-------------------|------|--------------------|-----------------|--------------------|------------------|----------------|------------------|
| 1  | 58.028740          | 29.518008       |                    |                   |                   |                   | G    |                    |                 |                    |                  |                |                  |
| 2  | 186.123703         | 93.565489       | 169.097154         | 85.052215         |                   |                   | K    | 1564.796093        | 782.901684      | 1547.769544        | 774.388410       | 1546.785528    | 773.8964         |
| 3  | <b>299.207767</b>  | 150.107521      | 282.181218         | 141.594247        |                   |                   | I    | <b>1436.701130</b> | 718.854203      | 1419.674581        | 710.340929       | 1418.690565    | 709.8489         |
| 4  | <b>428.250360</b>  | 214.628818      | 411.223811         | 206.115544        | <b>410.239795</b> | 205.623536        | E    | <b>1323.617066</b> | 662.312171      | 1306.590517        | 653.798896       | 1305.606501    | 653.3068         |
| 5  | <b>557.292953</b>  | 279.150115      | 540.266404         | 270.636840        | <b>539.282388</b> | 270.144832        | E    | <b>1194.574473</b> | 597.790874      | <b>1177.547924</b> | 589.277600       | 1176.563908    | 588.7855         |
| 6  | <b>672.319896</b>  | 336.663586      | 655.293347         | 328.150312        | 654.309331        | 327.658304        | D    | <b>1065.531880</b> | 533.269578      | 1048.505331        | 524.756303       | 1047.521315    | 524.2642         |
| 7  | 759.351924         | 380.179600      | 742.325375         | 371.666326        | 741.341359        | 371.174318        | S    | <b>950.504937</b>  | 475.756106      | 933.478388         | 467.242832       | 932.494372     | 466.7508         |
| 8  | <b>888.394517</b>  | 444.700897      | 871.367968         | 436.187622        | 870.383952        | 435.695614        | E    | <b>863.472909</b>  | 432.240092      | 846.446360         | 423.726818       | 845.462344     | 423.2348         |
| 9  | <b>987.462931</b>  | 494.235104      | 970.436382         | 485.721829        | 969.452366        | 485.229821        | V    | <b>734.430316</b>  | 367.718796      | 717.403767         | 359.205521       |                |                  |
| 10 | <b>1100.546995</b> | 550.777135      | 1083.520446        | 542.263861        | 1082.536430       | 541.771853        | L    | <b>635.361902</b>  | 318.184589      | 618.335353         | 309.671314       |                |                  |
| 11 | <b>1231.587480</b> | 616.297378      | 1214.560931        | 607.784104        | 1213.576915       | 607.292095        | M    | <b>522.277838</b>  | 261.642557      | 505.251289         | 253.129282       |                |                  |
| 12 | <b>1362.627965</b> | 681.817620      | <b>1345.601416</b> | <b>673.304346</b> | 1344.617400       | <b>672.812338</b> | M    | <b>391.237353</b>  | 196.122314      | 374.210804         | 187.609040       |                |                  |
| 13 | <b>1475.712029</b> | 738.359652      | 1458.685480        | 729.846378        | 1457.701464       | 729.354370        | I    | <b>260.196868</b>  | 130.602072      | 243.170319         | 122.088797       |                |                  |
| 14 |                    |                 |                    |                   |                   |                   | K    | 147.112804         | 74.060040       | 130.086255         | 65.546765        |                |                  |

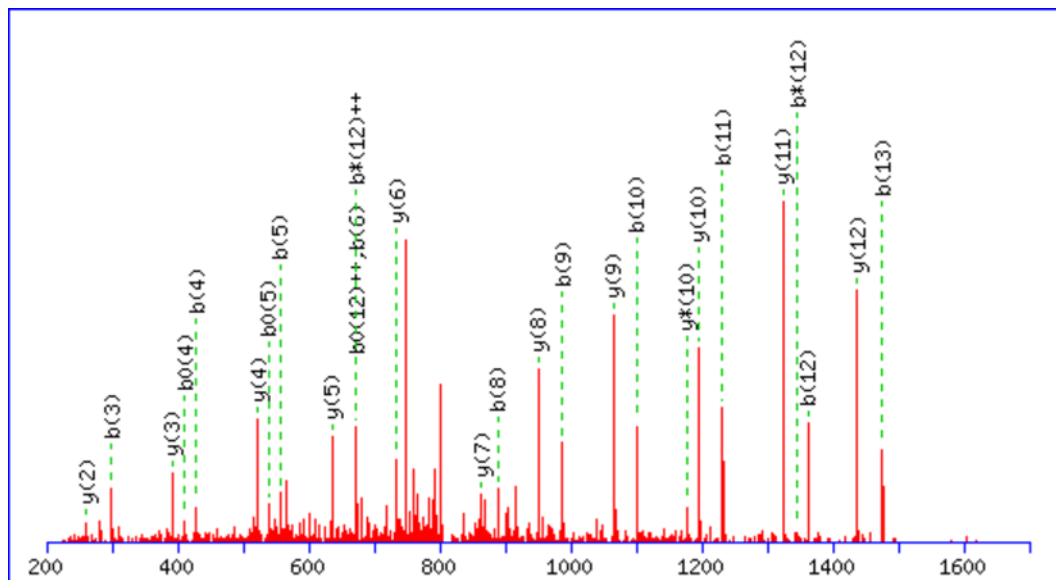

## Peptide View

MS/MS Fragmentation of **ATGDIKVTSEIK**

Found in **IPI00302614**, Tax\_Id=9606 Gene\_Symbol=VTCN1 V-set domain containing T cell activation inhibitor 1

**Experiment:** 30 - NOPE3 **Fraction:** NOPE3

Match to Query 8508: 1389.734648 from(695.874600,2+)

Title: OECHL100317\_35.8190.8190.2.dta

Data file \\Boromir\masse\Data LTQ-Orbitrap\Chrystelle Lacroix\Etude clinique sJPU\OECHL100317\_35.raw

**Monoisotopic mass of neutral peptide Mr(calc):** 1389.735107 **Fixed modifications:** Carbamidomethyl (C) (apply to specified residues or termini only) **Ions**

**Score:** 77 **Expect:** 2.3e-006 **Matches :** 29/128 fragment ions using 36 most intense peaks ([help](#))

| # | b                 | b <sup>++</sup> | b* | b <sup>*++</sup> | b <sup>0</sup>    | b <sup>0++</sup> | Seq. | y                  | y <sup>++</sup>   | y*          | y <sup>*++</sup> | y <sup>0</sup> | y <sup>0++</sup> |
|---|-------------------|-----------------|----|------------------|-------------------|------------------|------|--------------------|-------------------|-------------|------------------|----------------|------------------|
| 1 | 72.044390         | 36.525833       |    |                  |                   |                  | A    |                    |                   |             |                  |                |                  |
| 2 | 173.092069        | 87.049672       |    |                  | 155.081504        | 78.044390        | T    | <b>1319.705288</b> | 660.356282        | 1302.678739 | 651.843008       | 1301.694723    | 651.3509         |
| 3 | 230.113533        | 115.560404      |    |                  | 212.102968        | 106.555122       | G    | <b>1218.657609</b> | <b>609.832442</b> | 1201.631060 | 601.319168       | 1200.647044    | 600.8271         |
| 4 | <b>345.140476</b> | 173.073876      |    |                  | <b>327.129911</b> | 164.068593       | D    | 1161.636145        | <b>581.321710</b> | 1144.609596 | 572.808436       | 1143.625580    | 572.3164         |
| 5 | <b>458.224540</b> | 229.615908      |    |                  | <b>440.213975</b> | 220.610626       | I    | <b>1046.609202</b> | <b>523.808239</b> | 1029.582653 | 515.294964       | 1028.598637    | 514.8029         |

|    |                    |                   |             |            |                    |                   |          |                   |            |            |                   |                   |                 |
|----|--------------------|-------------------|-------------|------------|--------------------|-------------------|----------|-------------------|------------|------------|-------------------|-------------------|-----------------|
| 6  | <b>586.319503</b>  | 293.663390        | 569.292954  | 285.150115 | 568.308938         | <b>284.658107</b> | <b>K</b> | <b>933.525138</b> | 467.266207 | 916.498589 | 458.752932        | <b>915.514573</b> | <b>458.2609</b> |
| 7  | 685.387917         | 343.197597        | 668.361368  | 334.684322 | 667.377352         | 334.192314        | <b>V</b> | <b>805.430175</b> | 403.218725 | 788.403626 | 394.705451        | 787.419610        | 394.2134        |
| 8  | <b>786.435596</b>  | 393.721436        | 769.409047  | 385.208162 | 768.425031         | 384.716154        | <b>T</b> | <b>706.361761</b> | 353.684518 | 689.335212 | <b>345.171244</b> | 688.351196        | 344.6792        |
| 9  | <b>915.478189</b>  | <b>458.242733</b> | 898.451640  | 449.729458 | 897.467624         | 449.237450        | <b>E</b> | 605.314082        | 303.160679 | 588.287533 | 294.647404        | 587.303517        | 294.1553        |
| 10 | <b>1002.510217</b> | 501.758747        | 985.483668  | 493.245472 | 984.499652         | 492.753464        | <b>S</b> | <b>476.271489</b> | 238.639382 | 459.244940 | 230.126108        | <b>458.260924</b> | 229.6341        |
| 11 | <b>1131.552810</b> | 566.280043        | 1114.526261 | 557.766769 | <b>1113.542245</b> | 557.274760        | <b>E</b> | <b>389.239461</b> | 195.123368 | 372.212912 | 186.610094        | 371.228896        | 186.1180        |
| 12 | <b>1244.636874</b> | 622.822075        | 1227.610325 | 614.308800 | 1226.626309        | 613.816792        | <b>I</b> | <b>260.196868</b> | 130.602072 | 243.170319 | 122.088797        |                   |                 |
| 13 |                    |                   |             |            |                    |                   | <b>K</b> | 147.112804        | 74.060040  | 130.086255 | 65.546765         |                   |                 |

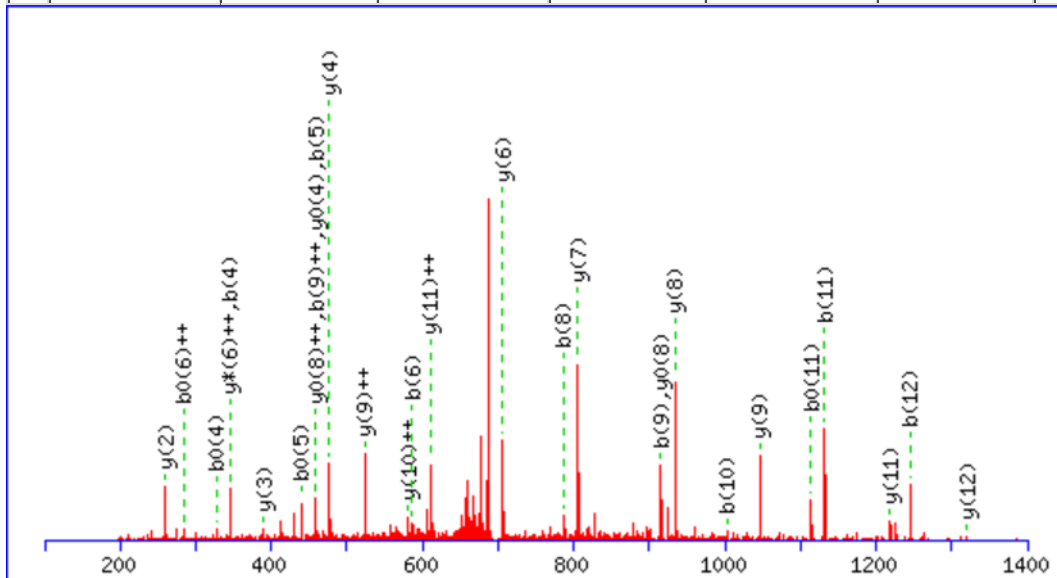

## Peptide View

MS/MS Fragmentation of **DFSLTSSSQTPGATK**

Found in **IPI00291300**, Tax\_Id=9606 Gene\_Symbol=PODXL2 Putative uncharacterized protein PODXL2

**Experiment: 30 - NOPE3 Fraction: NOPE3**

Match to Query 9954: 1525.729048 from(763.871800,2+)

Title: OECHL100317\_35.10816.10816.2.dta

Data file \\Boromir\masse\Data LTQ-Orbitrap\Chrystelle Lacroix\Etude clinique sJPU\OECHL100317\_35.raw

**Monoisotopic mass of neutral peptide Mr(cal): 1525.726028**Fixed modifications: Carbamidomethyl (C) (apply to specified residues or termini only)IonsScore: 57 Expect: 0.0002Matches : 25/150 fragment ions using 50 most intense peaks ([help](#))

| #  | b                  | b <sup>++</sup> | b*          | b <sup>*++</sup> | b <sup>0</sup>    | b <sup>0++</sup> | Seq. | y                  | y <sup>++</sup>   | y*          | y <sup>*++</sup>  | y <sup>0</sup> | y <sup>0++</sup> |
|----|--------------------|-----------------|-------------|------------------|-------------------|------------------|------|--------------------|-------------------|-------------|-------------------|----------------|------------------|
| 1  | 116.034219         | 58.520748       |             |                  | 98.023654         | 49.515465        | D    |                    |                   |             |                   |                |                  |
| 2  | <b>263.102633</b>  | 132.054954      |             |                  | 245.092068        | 123.049672       | F    | 1411.706351        | 706.356813        | 1394.679802 | 697.843539        | 1393.695786    | 697.3515         |
| 3  | <b>350.134661</b>  | 175.570968      |             |                  | <b>332.124096</b> | 166.565686       | S    | 1264.637937        | <b>632.822607</b> | 1247.611388 | 624.309332        | 1246.627372    | 623.8173         |
| 4  | 463.218725         | 232.113001      |             |                  | <b>445.208160</b> | 223.107718       | L    | <b>1177.605909</b> | 589.306592        | 1160.579360 | 580.793318        | 1159.595344    | 580.3013         |
| 5  | <b>564.266404</b>  | 282.636840      |             |                  | <b>546.255839</b> | 273.631558       | T    | <b>1064.521845</b> | 532.764561        | 1047.495296 | 524.251286        | 1046.511280    | 523.7592         |
| 6  | 651.298432         | 326.152854      |             |                  | <b>633.287867</b> | 317.147572       | S    | <b>963.474166</b>  | 482.240721        | 946.447617  | <b>473.727446</b> | 945.463601     | <b>473.2354</b>  |
| 7  | 738.330460         | 369.668868      |             |                  | 720.319895        | 360.663586       | S    | <b>876.442138</b>  | 438.724707        | 859.415589  | 430.211432        | 858.431573     | 429.7194         |
| 8  | <b>825.362488</b>  | 413.184882      |             |                  | 807.351923        | 404.179599       | S    | <b>789.410110</b>  | 395.208693        | 772.383561  | 386.695418        | 771.399545     | 386.2034         |
| 9  | <b>953.421066</b>  | 477.214171      | 936.394517  | 468.700897       | 935.410501        | 468.208889       | Q    | <b>702.378082</b>  | 351.692679        | 685.351533  | 343.179404        | 684.367517     | 342.6873         |
| 10 | <b>1054.468745</b> | 527.738010      | 1037.442196 | 519.224736       | 1036.458180       | 518.732728       | T    | <b>574.319504</b>  | 287.663390        | 557.292955  | 279.150115        | 556.308939     | 278.6581         |
| 11 | 1151.521509        | 576.264392      | 1134.494960 | 567.751118       | 1133.510944       | 567.259110       | P    | <b>473.271825</b>  | 237.139550        | 456.245276  | 228.626276        | 455.261260     | 228.1342         |
| 12 | 1208.542973        | 604.775124      | 1191.516424 | 596.261850       | 1190.532408       | 595.769842       | G    | <b>376.219061</b>  | 188.613168        | 359.192512  | 180.099894        | 358.208496     | 179.6078         |
| 13 | <b>1279.580087</b> | 640.293681      | 1262.553538 | 631.780407       | 1261.569522       | 631.288399       | A    | 319.197597         | 160.102436        | 302.171048  | 151.589162        | 301.187032     | 151.0971         |
| 14 | <b>1380.627766</b> | 690.817521      | 1363.601217 | 682.304246       | 1362.617201       | 681.812238       | T    | <b>248.160483</b>  | 124.583879        | 231.133934  | 116.070605        | 230.149918     | 115.5785         |
| 15 |                    |                 |             |                  |                   |                  | K    | 147.112804         | 74.060040         | 130.086255  | 65.546765         |                |                  |

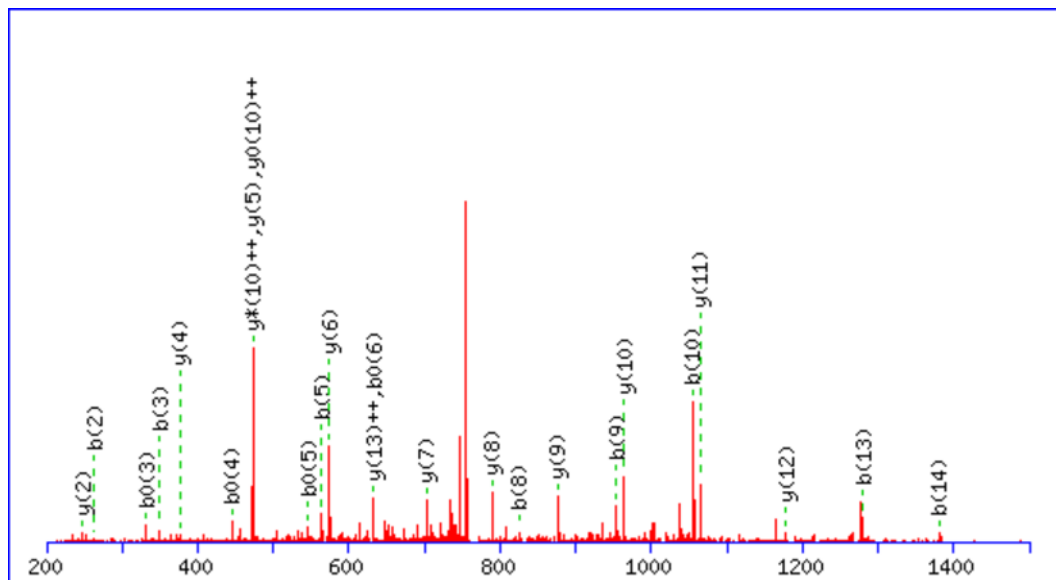

## Peptide View

MS/MS Fragmentation of **LLYDASNLETGVPSR**

Found in **IPI00003111**, Tax\_Id=9606 Gene\_Symbol=LOC652694 Ig kappa chain V-I region AU

**Experiment:** 30 - NOPE3 **Fraction:** NOPE3

Match to Query 12255: 1746.917648 from(874.466100,2+)

Title: OECHL100317\_35.17062.17062.2.dta

Data file \\Boromir\masse\Data LTQ-Orbitrap\Chrystelle Lacroix\Etude clinique sJPU\OECHL100317\_35.raw

**Monoisotopic mass of neutral peptide Mr(calc):** 1746.915192 **Fixed modifications:** Carbamidomethyl (C) (apply to specified residues or termini only) **Ions**

**Score:** 82 **Expect:** 6e-007 **Matches :** 27/156 fragment ions using 42 most intense peaks ([help](#))

| # | b                 | b <sup>++</sup> | b* | b <sup>*++</sup> | b <sup>0</sup> | b <sup>0++</sup> | Seq. | y                  | y <sup>++</sup> | y*          | y <sup>*++</sup> | y <sup>0</sup>     | y <sup>0++</sup> |
|---|-------------------|-----------------|----|------------------|----------------|------------------|------|--------------------|-----------------|-------------|------------------|--------------------|------------------|
| 1 | 114.091340        | 57.549308       |    |                  |                |                  | L    |                    |                 |             |                  |                    |                  |
| 2 | 227.175404        | 114.091340      |    |                  |                |                  | L    | 1634.838427        | 817.922852      | 1617.811878 | 809.409577       | 1616.827862        | 808.9175         |
| 3 | 340.259468        | 170.633372      |    |                  |                |                  | I    | <b>1521.754363</b> | 761.380820      | 1504.727814 | 752.867545       | 1503.743798        | 752.3755         |
| 4 | 503.322797        | 252.165036      |    |                  |                |                  | Y    | 1408.670299        | 704.838788      | 1391.643750 | 696.325513       | <b>1390.659734</b> | 695.8335         |
| 5 | <b>618.349740</b> | 309.678508      |    |                  | 600.339175     | 300.673226       | D    | <b>1245.606970</b> | 623.307123      | 1228.580421 | 614.793849       | 1227.596405        | 614.3018         |

|    |                    |                   |                    |            |             |            |   |                    |            |                   |            |                   |          |
|----|--------------------|-------------------|--------------------|------------|-------------|------------|---|--------------------|------------|-------------------|------------|-------------------|----------|
| 6  | <b>689.386854</b>  | 345.197065        |                    |            | 671.376289  | 336.191782 | A | <b>1130.580027</b> | 565.793652 | 1113.553478       | 557.280377 | 1112.569462       | 556.7883 |
| 7  | 776.418882         | 388.713079        |                    |            | 758.408317  | 379.707796 | S | <b>1059.542913</b> | 530.275095 | 1042.516364       | 521.761820 | 1041.532348       | 521.2698 |
| 8  | 890.461809         | 445.734542        | 873.435260         | 437.221268 | 872.451244  | 436.729260 | N | <b>972.510885</b>  | 486.759081 | 955.484336        | 478.245806 | 954.500320        | 477.7537 |
| 9  | <b>1003.545873</b> | 502.276574        | 986.519324         | 493.763300 | 985.535308  | 493.271292 | L | <b>858.467958</b>  | 429.737617 | 841.441409        | 421.224343 | <b>840.457393</b> | 420.7323 |
| 10 | <b>1132.588466</b> | 566.797871        | 1115.561917        | 558.284597 | 1114.577901 | 557.792588 | E | <b>745.383894</b>  | 373.195585 | 728.357345        | 364.682311 | <b>727.373329</b> | 364.1903 |
| 11 | <b>1233.636145</b> | <b>617.321710</b> | 1216.609596        | 608.808436 | 1215.625580 | 608.316428 | T | <b>616.341301</b>  | 308.674289 | 599.314752        | 300.161014 | 598.330736        | 299.6690 |
| 12 | <b>1290.657609</b> | 645.832442        | 1273.631060        | 637.319168 | 1272.647044 | 636.827160 | G | <b>515.293622</b>  | 258.150449 | 498.267073        | 249.637175 | 497.283057        | 249.1451 |
| 13 | <b>1389.726023</b> | 695.366649        | <b>1372.699474</b> | 686.853375 | 1371.715458 | 686.361367 | V | <b>458.272158</b>  | 229.639717 | 441.245609        | 221.126443 | 440.261593        | 220.6344 |
| 14 | 1486.778787        | 743.893032        | 1469.752238        | 735.379757 | 1468.768222 | 734.887749 | P | <b>359.203744</b>  | 180.105510 | <b>342.177195</b> | 171.592236 | <b>341.193179</b> | 171.1002 |
| 15 | <b>1573.810815</b> | 787.409046        | <b>1556.784266</b> | 778.895771 | 1555.800250 | 778.403763 | S | 262.150980         | 131.579128 | 245.124431        | 123.065854 | 244.140415        | 122.5738 |
| 16 |                    |                   |                    |            |             |            | R | 175.118952         | 88.063114  | 158.092403        | 79.549839  |                   |          |

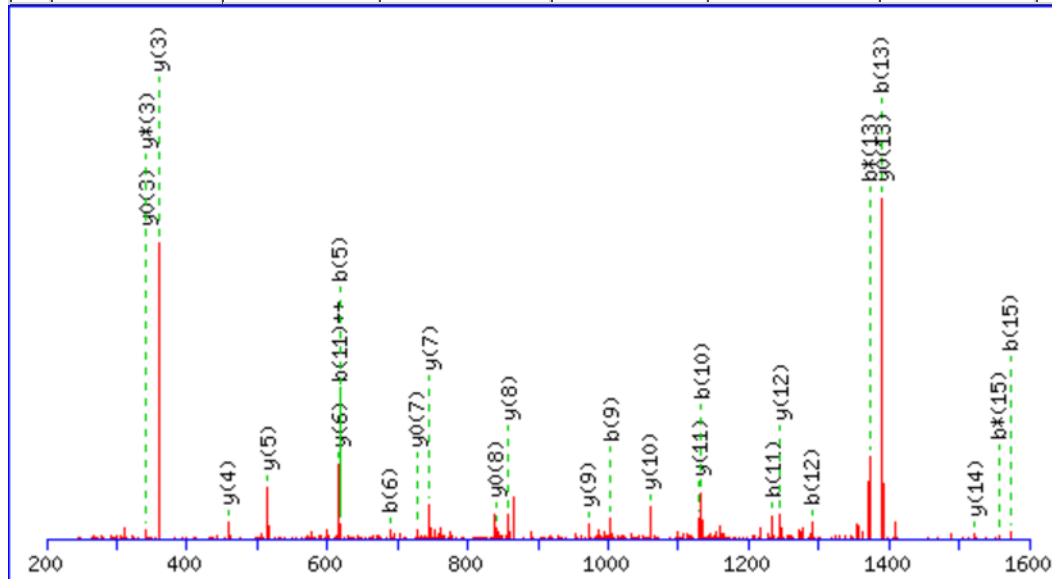

## Peptide View

MS/MS Fragmentation of **AFSMDEHNAALR**

Found in **IPI00008239**, Tax\_Id=9606 Gene\_Symbol=GPRC5B cDNA FLJ55176, highly similar to G-protein coupled receptor family C group 5 member B

**Experiment:** 30 - NOPE3 **Fraction:** NOPE3

Match to Query 8249: 1360.621248 from(681.317900,2+)

Title: OECHL100317\_35.9683.9683.2.dta

Data file \\Boromir\masse\Data LTQ-Orbitrap\Chrystelle Lacroix\Etude clinique sJPU\OECHL100317\_35.raw

**Monoisotopic mass of neutral peptide Mr(calc):** 1360.619354**Fixed modifications:** Carbamidomethyl (C) (apply to specified residues or termini only)**Ions****Score:** 56 **Expect:** 0.00018**Matches :** 17/102 fragment ions using 24 most intense peaks ([help](#))

| #  | <b>b</b>           | <b>b<sup>++</sup></b> | <b>b*</b>          | <b>b*<sup>++</sup></b> | <b>b<sup>0</sup></b> | <b>b<sup>0++</sup></b> | Seq. | <b>y</b>           | <b>y<sup>++</sup></b> | <b>y*</b>   | <b>y*<sup>++</sup></b> | <b>y<sup>0</sup></b> | <b>y<sup>0++</sup></b> |
|----|--------------------|-----------------------|--------------------|------------------------|----------------------|------------------------|------|--------------------|-----------------------|-------------|------------------------|----------------------|------------------------|
| 1  | 72.044390          | 36.525833             |                    |                        |                      |                        | A    |                    |                       |             |                        |                      |                        |
| 2  | <b>219.112804</b>  | 110.060040            |                    |                        |                      |                        | F    | 1290.589546        | 645.798411            | 1273.562997 | 637.285137             | 1272.578981          | 636.7931               |
| 3  | 306.144832         | 153.576054            |                    |                        | <b>288.134267</b>    | 144.570772             | S    | <b>1143.521132</b> | <b>572.264204</b>     | 1126.494583 | 563.750929             | 1125.510567          | 563.2589               |
| 4  | 437.185317         | <b>219.096296</b>     |                    |                        | 419.174752           | 210.091014             | M    | <b>1056.489104</b> | 528.748190            | 1039.462555 | 520.234916             | 1038.478539          | 519.7429               |
| 5  | 552.212260         | 276.609768            |                    |                        | 534.201695           | 267.604486             | D    | <b>925.448619</b>  | <b>463.227947</b>     | 908.422070  | 454.714673             | 907.438054           | 454.2226               |
| 6  | 681.254853         | 341.131065            |                    |                        | 663.244288           | 332.125782             | E    | <b>810.421676</b>  | 405.714476            | 793.395127  | 397.201201             | 792.411111           | 396.7091               |
| 7  | <b>818.313765</b>  | 409.660521            |                    |                        | 800.303200           | 400.655238             | H    | 681.379083         | 341.193179            | 664.352534  | 332.679905             |                      |                        |
| 8  | 932.356692         | 466.681984            | 915.330143         | 458.168709             | 914.346127           | 457.676701             | N    | <b>544.320171</b>  | 272.663724            | 527.293622  | 264.150449             |                      |                        |
| 9  | 1003.393806        | 502.200541            | 986.367257         | 493.687266             | 985.383241           | 493.195258             | A    | <b>430.277244</b>  | 215.642260            | 413.250695  | 207.128985             |                      |                        |
| 10 | 1074.430920        | 537.719098            | <b>1057.404371</b> | 529.205824             | <b>1056.420355</b>   | 528.713816             | A    | <b>359.240130</b>  | 180.123703            | 342.213581  | 171.610428             |                      |                        |
| 11 | <b>1187.514984</b> | 594.261130            | 1170.488435        | 585.747856             | 1169.504419          | 585.255847             | L    | <b>288.203016</b>  | 144.605146            | 271.176467  | 136.091871             |                      |                        |
| 12 |                    |                       |                    |                        |                      |                        | R    | 175.118952         | 88.063114             | 158.092403  | 79.549839              |                      |                        |

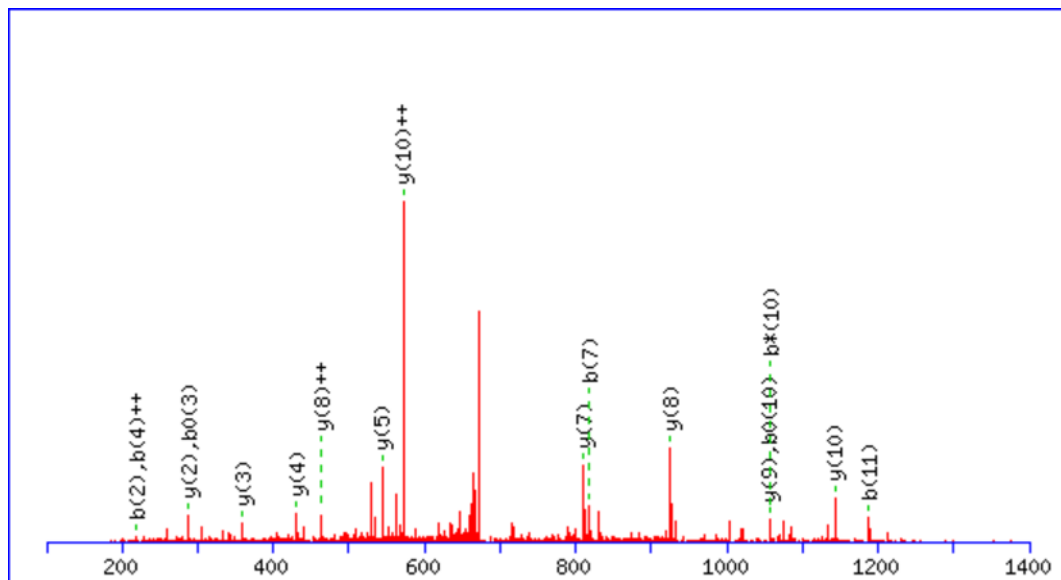

## Peptide View

MS/MS Fragmentation of **EAGSAVEAEELVK**

Found in **IPI0008586**, Tax\_Id=9606 Gene\_Symbol=CSPG5 Isoform 1 of Chondroitin sulfate proteoglycan 5

**Experiment:** 30 - NOPE3 **Fraction:** NOPE3

Match to Query 7963: 1330.660248 from(666.337400,2+)

Title: OECHL100317\_35.11369.11369.2.dta

Data file \\Boromir\masse\Data LTQ-Orbitrap\Chrystelle Lacroix\Etude clinique sJPU\OECHL100317\_35.raw

**Monoisotopic mass of neutral peptide Mr(calc):** 1330.661591 **Fixed modifications:** Carbamidomethyl (C) (apply to specified residues or termini only) **Ions**

**Score:** 65 **Expect:** 4.8e-005 **Matches :** 37/114 fragment ions using 76 most intense peaks ([help](#))

| # | b                 | b <sup>++</sup> | b <sup>0</sup>    | b <sup>0++</sup> | Seq.     | y                  | y <sup>++</sup>   | y*                 | y <sup>*++</sup>  | y <sup>0</sup> | y <sup>0++</sup>  | #         |
|---|-------------------|-----------------|-------------------|------------------|----------|--------------------|-------------------|--------------------|-------------------|----------------|-------------------|-----------|
| 1 | 130.049869        | 65.528572       | 112.039304        | 56.523290        | <b>E</b> |                    |                   |                    |                   |                |                   | <b>13</b> |
| 2 | <b>201.086983</b> | 101.047130      | 183.076418        | 92.041847        | <b>A</b> | <b>1202.626309</b> | 601.816793        | <b>1185.599760</b> | 593.303518        | 1184.615744    | 592.811510        | <b>12</b> |
| 3 | <b>258.108447</b> | 129.557862      | <b>240.097882</b> | 120.552579       | <b>G</b> | <b>1131.589195</b> | <b>566.298236</b> | 1114.562646        | <b>557.784961</b> | 1113.578630    | <b>557.292953</b> | <b>11</b> |
| 4 | 345.140475        | 173.073875      | <b>327.129910</b> | 164.068593       | <b>S</b> | <b>1074.567731</b> | <b>537.787504</b> | 1057.541182        | 529.274229        | 1056.557166    | 528.782221        | <b>10</b> |
| 5 | <b>416.177589</b> | 208.592432      | <b>398.167024</b> | 199.587150       | <b>A</b> | <b>987.535703</b>  | 494.271490        | 970.509154         | 485.758215        | 969.525138     | 485.266207        | <b>9</b>  |



|    |             |            |             |            |   |            |            |            |            |            |            |   |
|----|-------------|------------|-------------|------------|---|------------|------------|------------|------------|------------|------------|---|
| 6  | 515.246003  | 258.126640 | 497.235438  | 249.121357 | V | 916.498589 | 458.752933 | 899.472040 | 450.239658 | 898.488024 | 449.747650 | 8 |
| 7  | 644.288596  | 322.647936 | 626.278031  | 313.642653 | E | 817.430175 | 409.218726 | 800.403626 | 400.705451 | 799.419610 | 400.213443 | 7 |
| 8  | 715.325710  | 358.166493 | 697.315145  | 349.161210 | A | 688.387582 | 344.697429 | 671.361033 | 336.184155 | 670.377017 | 335.692147 | 6 |
| 9  | 844.368303  | 422.687790 | 826.357738  | 413.682507 | E | 617.350468 | 309.178872 | 600.323919 | 300.665598 | 599.339903 | 300.173590 | 5 |
| 10 | 973.410896  | 487.209086 | 955.400331  | 478.203803 | E | 488.307875 | 244.657576 | 471.281326 | 236.144301 | 470.297310 | 235.652293 | 4 |
| 11 | 1086.494960 | 543.751118 | 1068.484395 | 534.745836 | L | 359.265282 | 180.136279 | 342.238733 | 171.623005 |            |            | 3 |
| 12 | 1185.563374 | 593.285325 | 1167.552809 | 584.280043 | V | 246.181218 | 123.594247 | 229.154669 | 115.080973 |            |            | 2 |
| 13 |             |            |             |            | K | 147.112804 | 74.060040  | 130.086255 | 65.546765  |            |            | 1 |

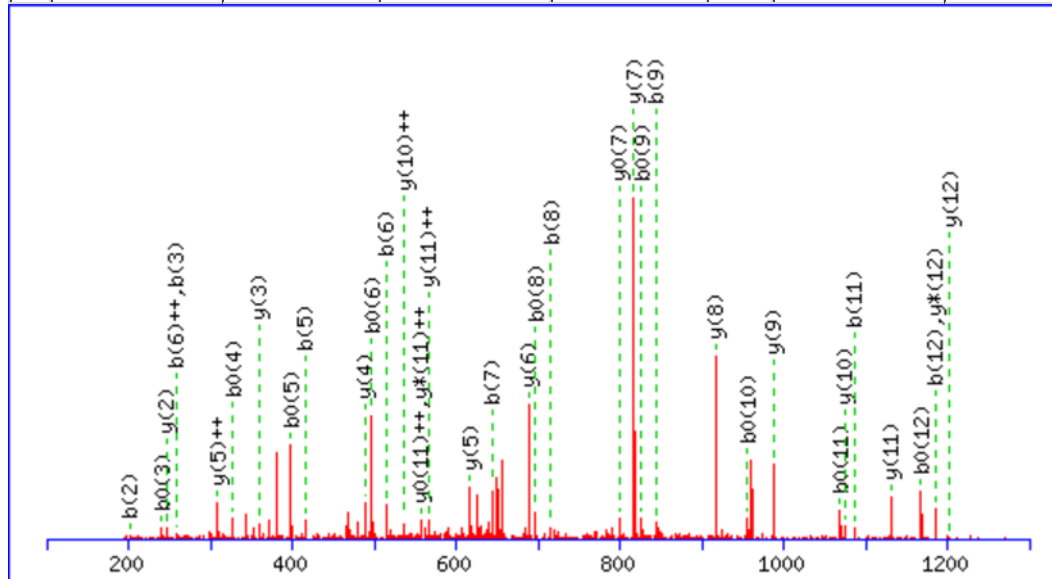

## Peptide View

MS/MS Fragmentation of **TGAVYVAEIGAK**

Found in **IPI00552937**, Tax\_Id=9606 Gene\_Symbol=NHLRC3 NHL repeat-containing protein 3

Experiment: 30 - NOPE3 Fraction: NOPE3

Match to Query 5904: 1177.634848 from(589.824700,2+)

Title: OECHL100317\_35.11336.11336.2.dta

Data file \\Boromir\masse\Data LTQ-Orbitrap\Chrystelle Lacroix\Etude clinique sJPU\OECHL100317\_35.raw

**Monoisotopic mass of neutral peptide Mr(cal):** 1177.634277**Fixed modifications:** Carbamidomethyl (C) (apply to specified residues or termini only)**Ions****Score:** 62 **Expect:** 4.4e-005**Matches :** 14/102 fragment ions using 30 most intense peaks ([help](#))

| #  | b           | b <sup>++</sup> | b <sup>0</sup> | b <sup>0++</sup> | Seq. | y           | y <sup>++</sup> | y*          | y* <sup>++</sup> | y <sup>0</sup> | y <sup>0++</sup> | #  |
|----|-------------|-----------------|----------------|------------------|------|-------------|-----------------|-------------|------------------|----------------|------------------|----|
| 1  | 102.054955  | 51.531116       | 84.044390      | 42.525833        | T    |             |                 |             |                  |                |                  | 12 |
| 2  | 159.076419  | 80.041847       | 141.065854     | 71.036565        | G    | 1077.593888 | 539.300582      | 1060.567339 | 530.787308       | 1059.583323    | 530.295300       | 11 |
| 3  | 230.113533  | 115.560404      | 212.102968     | 106.555122       | A    | 1020.572424 | 510.789850      | 1003.545875 | 502.276576       | 1002.561859    | 501.784568       | 10 |
| 4  | 329.181947  | 165.094611      | 311.171382     | 156.089329       | V    | 949.535310  | 475.271293      | 932.508761  | 466.758019       | 931.524745     | 466.266011       | 9  |
| 5  | 492.245276  | 246.626276      | 474.234711     | 237.620994       | Y    | 850.466896  | 425.737086      | 833.440347  | 417.223812       | 832.456331     | 416.731804       | 8  |
| 6  | 591.313690  | 296.160483      | 573.303125     | 287.155201       | V    | 687.403567  | 344.205422      | 670.377018  | 335.692147       | 669.393002     | 335.200139       | 7  |
| 7  | 662.350804  | 331.679040      | 644.340239     | 322.673758       | A    | 588.335153  | 294.671215      | 571.308604  | 286.157940       | 570.324588     | 285.665932       | 6  |
| 8  | 791.393397  | 396.200337      | 773.382832     | 387.195054       | E    | 517.298039  | 259.152658      | 500.271490  | 250.639383       | 499.287474     | 250.147375       | 5  |
| 9  | 904.477461  | 452.742369      | 886.466896     | 443.737086       | I    | 388.255446  | 194.631361      | 371.228897  | 186.118087       |                |                  | 4  |
| 10 | 961.498925  | 481.253101      | 943.488360     | 472.247818       | G    | 275.171382  | 138.089329      | 258.144833  | 129.576055       |                |                  | 3  |
| 11 | 1032.536039 | 516.771658      | 1014.525474    | 507.766375       | A    | 218.149918  | 109.578597      | 201.123369  | 101.065322       |                |                  | 2  |
| 12 |             |                 |                |                  | K    | 147.112804  | 74.060040       | 130.086255  | 65.546765        |                |                  | 1  |

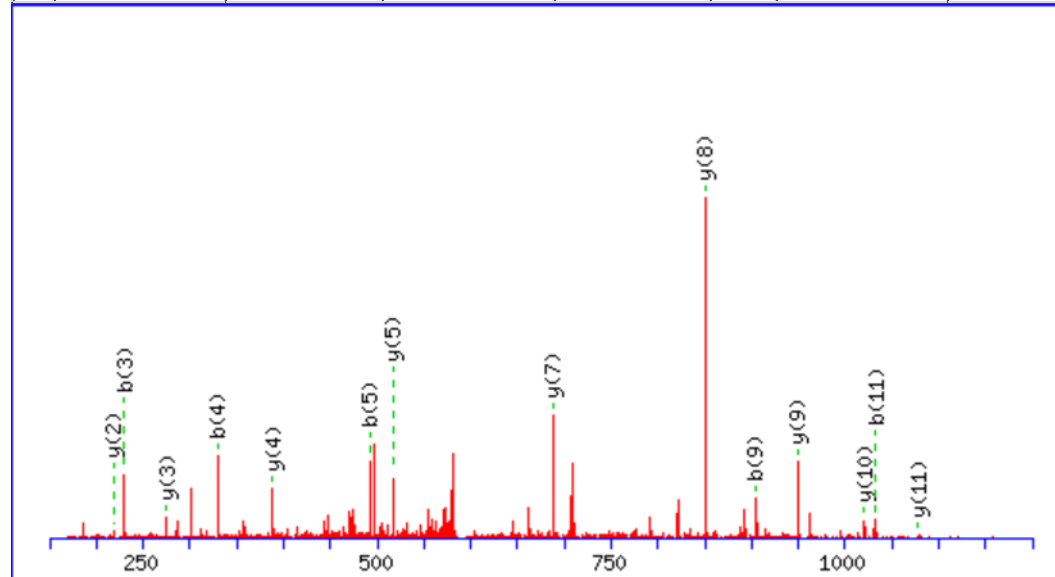

## Peptide View

MS/MS Fragmentation of **LQQSSHGYSCEK**Found in **IPI00646291**, Tax\_Id=9606 Gene\_Symbol=GPR180 Integral membrane protein GPR180**Experiment:** 30 - NOPE3 **Fraction:** NOPE3

Match to Query 9793: 1509.654648 from(755.834600,2+)

Title: OECHL100317\_35.2400.2400.2.dta

Data file \\Boromir\masse\Data LTQ-Orbitrap\Chrystelle Lacroix\Etude clinique sJPU\OECHL100317\_35.raw

**Monoisotopic mass of neutral peptide Mr(calc):** 1509.651794**Fixed modifications:** Carbamidomethyl (C) (apply to specified residues or termini only)**Ions****Score:** 60 **Expect:** 4.6e-005**Matches :** 18/134 fragment ions using 26 most intense peaks ([help](#))

| #  | b                  | b <sup>++</sup> | b*                | b <sup>*++</sup> | b <sup>0</sup> | b <sup>0++</sup> | Seq. | y                  | y <sup>++</sup> | y*                 | y <sup>*++</sup>  | y <sup>0</sup> | y <sup>0++</sup> |
|----|--------------------|-----------------|-------------------|------------------|----------------|------------------|------|--------------------|-----------------|--------------------|-------------------|----------------|------------------|
| 1  | 114.091340         | 57.549308       |                   |                  |                |                  | L    |                    |                 |                    |                   |                |                  |
| 2  | <b>242.149918</b>  | 121.578597      | <b>225.123369</b> | 113.065323       |                |                  | Q    | 1397.575019        | 699.291148      | 1380.548470        | 690.777873        | 1379.564454    | 690.2858         |
| 3  | <b>370.208496</b>  | 185.607886      | 353.181947        | 177.094612       |                |                  | Q    | <b>1269.516441</b> | 635.261859      | <b>1252.489892</b> | <b>626.748584</b> | 1251.505876    | <b>626.2565</b>  |
| 4  | 457.240524         | 229.123900      | 440.213975        | 220.610626       | 439.229959     | 220.118618       | S    | <b>1141.457863</b> | 571.232570      | 1124.431314        | 562.719295        | 1123.447298    | 562.2272         |
| 5  | 544.272552         | 272.639914      | 527.246003        | 264.126640       | 526.261987     | 263.634632       | S    | <b>1054.425835</b> | 527.716556      | 1037.399286        | 519.203281        | 1036.415270    | 518.7112         |
| 6  | 681.331464         | 341.169370      | 664.304915        | 332.656095       | 663.320899     | 332.164087       | H    | <b>967.393807</b>  | 484.200542      | 950.367258         | 475.687267        | 949.383242     | 475.1952         |
| 7  | <b>738.352928</b>  | 369.680102      | 721.326379        | 361.166828       | 720.342363     | 360.674820       | G    | <b>830.334895</b>  | 415.671086      | 813.308346         | 407.157811        | 812.324330     | 406.6658         |
| 8  | <b>901.416257</b>  | 451.211767      | 884.389708        | 442.698492       | 883.405692     | 442.206484       | Y    | 773.313431         | 387.160354      | 756.286882         | 378.647079        | 755.302866     | 378.1550         |
| 9  | <b>988.448285</b>  | 494.727781      | 971.421736        | 486.214506       | 970.437720     | 485.722498       | S    | <b>610.250102</b>  | 305.628689      | 593.223553         | 297.115415        | 592.239537     | 296.6234         |
| 10 | 1148.478934        | 574.743105      | 1131.452385       | 566.229831       | 1130.468369    | 565.737822       | C    | <b>523.218074</b>  | 262.112675      | 506.191525         | 253.599401        | 505.207509     | 253.1073         |
| 11 | 1235.510962        | 618.259119      | 1218.484413       | 609.745845       | 1217.500397    | 609.253837       | S    | <b>363.187425</b>  | 182.097351      | 346.160876         | 173.584076        | 345.176860     | 173.0920         |
| 12 | <b>1364.553555</b> | 682.780416      | 1347.527006       | 674.267141       | 1346.542990    | 673.775133       | E    | 276.155397         | 138.581337      | 259.128848         | 130.068062        | 258.144832     | 129.5760         |
| 13 |                    |                 |                   |                  |                |                  | K    | 147.112804         | 74.060040       | 130.086255         | 65.546765         |                |                  |

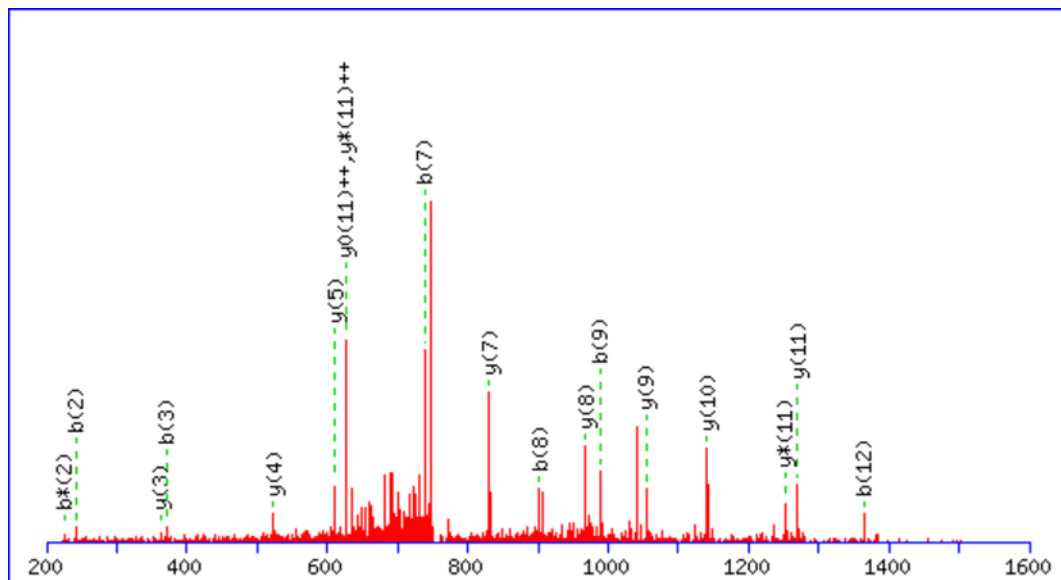

## Peptide View

MS/MS Fragmentation of **AVGLLTVISK**

Found in **IPI00013446**, Tax\_Id=9606 Gene\_Symbol=PSCA Prostate stem cell antigen

**Experiment:** 30 - NOPE3 **Fraction:** NOPE3

Match to Query 3413: 999.633448 from(500.824000,2+)

Title: OECHL100317\_35.17226.17226.2.dta

Data file \\Boromir\masse\Data LTQ-Orbitrap\Chrystelle Lacroix\Etude clinique sJPU\OECHL100317\_35.raw

**Monoisotopic mass of neutral peptide Mr(calc):** 999.632828 **Fixed modifications:** Carbamidomethyl (C) (apply to specified residues or termini only) **Ions Score:**

59 **Expect:** 1.5e-005 **Matches :** 14/78 fragment ions using 26 most intense peaks ([help](#))

| # | b                 | b <sup>++</sup>   | b <sup>0</sup> | b <sup>0++</sup> | Seq. | y                 | y <sup>++</sup> | y <sup>*</sup> | y <sup>*++</sup> | y <sup>0</sup> | y <sup>0++</sup> | #  |
|---|-------------------|-------------------|----------------|------------------|------|-------------------|-----------------|----------------|------------------|----------------|------------------|----|
| 1 | 72.044390         | 36.525833         |                |                  | A    |                   |                 |                |                  |                |                  | 10 |
| 2 | <b>171.112804</b> | 86.060040         |                |                  | V    | 929.602995        | 465.305136      | 912.576446     | 456.791861       | 911.592430     | 456.299853       | 9  |
| 3 | <b>228.134268</b> | 114.570772        |                |                  | G    | <b>830.534581</b> | 415.770929      | 813.508032     | 407.257654       | 812.524016     | 406.765646       | 8  |
| 4 | <b>341.218332</b> | <b>171.112804</b> |                |                  | L    | 773.513117        | 387.260197      | 756.486568     | 378.746922       | 755.502552     | 378.254914       | 7  |
| 5 | <b>454.302396</b> | 227.654836        |                |                  | L    | <b>660.429053</b> | 330.718165      | 643.402504     | 322.204890       | 642.418488     | 321.712882       | 6  |

|    |                   |            |            |            |          |                   |            |            |            |            |            |          |
|----|-------------------|------------|------------|------------|----------|-------------------|------------|------------|------------|------------|------------|----------|
| 6  | <b>555.350075</b> | 278.178676 | 537.339510 | 269.173393 | <b>T</b> | <b>547.344989</b> | 274.176133 | 530.318440 | 265.662858 | 529.334424 | 265.170850 | <b>5</b> |
| 7  | <b>654.418489</b> | 327.712883 | 636.407924 | 318.707600 | <b>V</b> | 446.297310        | 223.652293 | 429.270761 | 215.139018 | 428.286745 | 214.647010 | <b>4</b> |
| 8  | <b>767.502553</b> | 384.254915 | 749.491988 | 375.249632 | <b>I</b> | <b>347.228896</b> | 174.118086 | 330.202347 | 165.604811 | 329.218331 | 165.112803 | <b>3</b> |
| 9  | <b>854.534581</b> | 427.770929 | 836.524016 | 418.765646 | <b>S</b> | <b>234.144832</b> | 117.576054 | 217.118283 | 109.062779 | 216.134267 | 108.570771 | <b>2</b> |
| 10 |                   |            |            |            | <b>K</b> | 147.112804        | 74.060040  | 130.086255 | 65.546765  |            |            | <b>1</b> |

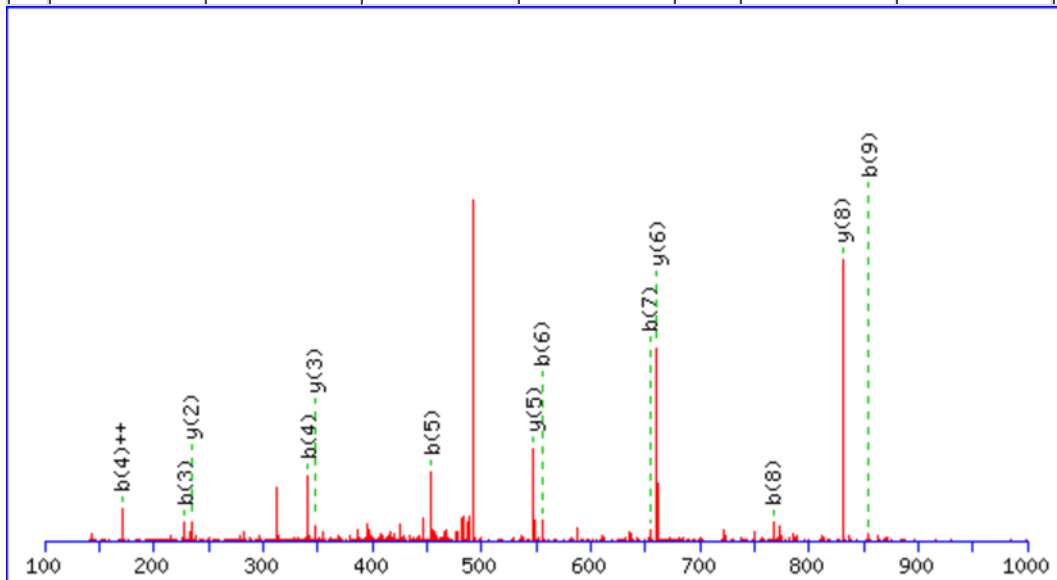

## Peptide View

MS/MS Fragmentation of **LEGEACGVYTPR**

Found in **IPI00297284**, Tax\_Id=9606 Gene\_Symbol=IGFBP2 Insulin-like growth factor-binding protein 2

**Experiment:** 30 - NOPE3 **Fraction:** NOPE3

Match to Query 8135: 1350.624848 from(676.319700,2+)

Title: OECHL100317\_35.8693.8693.2.dta

Data file \\Boromir\masse\Data LTQ-Orbitrap\Chrystelle Lacroix\Etude clinique sJPU\OECHL100317\_35.raw

**Monoisotopic mass of neutral peptide Mr(calc):** 1350.623795 **Fixed modifications:** Carbamidomethyl (C) (apply to specified residues or termini only) **Ions**

**Score:** 57 **Expect:** 0.0002 **Matches :** 15/104 fragment ions using 24 most intense peaks ([help](#))

| # | b | b <sup>++</sup> | b <sup>0</sup> | b <sup>0++</sup> | Seq. | y | y <sup>++</sup> | y* | y <sup>*++</sup> | y <sup>0</sup> | y <sup>0++</sup> | # |
|---|---|-----------------|----------------|------------------|------|---|-----------------|----|------------------|----------------|------------------|---|
|---|---|-----------------|----------------|------------------|------|---|-----------------|----|------------------|----------------|------------------|---|

|    |                    |            |                    |            |   |                    |                   |             |            |             |            |    |
|----|--------------------|------------|--------------------|------------|---|--------------------|-------------------|-------------|------------|-------------|------------|----|
| 1  | 114.091340         | 57.549308  |                    |            | L |                    |                   |             |            |             |            | 12 |
| 2  | <b>243.133933</b>  | 122.070605 | 225.123368         | 113.065322 | E | <b>1238.547015</b> | 619.777146        | 1221.520466 | 611.263871 | 1220.536450 | 610.771863 | 11 |
| 3  | 300.155397         | 150.581336 | 282.144832         | 141.576054 | G | <b>1109.504422</b> | <b>555.255849</b> | 1092.477873 | 546.742575 | 1091.493857 | 546.250567 | 10 |
| 4  | <b>429.197990</b>  | 215.102633 | 411.187425         | 206.097351 | E | 1052.482958        | 526.745117        | 1035.456409 | 518.231843 | 1034.472393 | 517.739835 | 9  |
| 5  | 500.235104         | 250.621190 | 482.224539         | 241.615908 | A | <b>923.440365</b>  | 462.223821        | 906.413816  | 453.710546 | 905.429800  | 453.218538 | 8  |
| 6  | 660.265753         | 330.636515 | 642.255188         | 321.631232 | C | <b>852.403251</b>  | 426.705264        | 835.376702  | 418.191989 | 834.392686  | 417.699981 | 7  |
| 7  | 717.287217         | 359.147247 | 699.276652         | 350.141964 | G | <b>692.372602</b>  | 346.689939        | 675.346053  | 338.176665 | 674.362037  | 337.684657 | 6  |
| 8  | <b>816.355631</b>  | 408.681454 | 798.345066         | 399.676171 | V | 635.351138         | 318.179207        | 618.324589  | 309.665933 | 617.340573  | 309.173925 | 5  |
| 9  | <b>979.418960</b>  | 490.213118 | 961.408395         | 481.207836 | Y | <b>536.282724</b>  | 268.645000        | 519.256175  | 260.131726 | 518.272159  | 259.639718 | 4  |
| 10 | <b>1080.466639</b> | 540.736958 | <b>1062.456074</b> | 531.731675 | T | <b>373.219395</b>  | 187.113335        | 356.192846  | 178.600061 | 355.208830  | 178.108053 | 3  |
| 11 | 1177.519403        | 589.263340 | 1159.508838        | 580.258057 | P | <b>272.171716</b>  | 136.589496        | 255.145167  | 128.076221 |             |            | 2  |
| 12 |                    |            |                    |            | R | 175.118952         | 88.063114         | 158.092403  | 79.549839  |             |            | 1  |

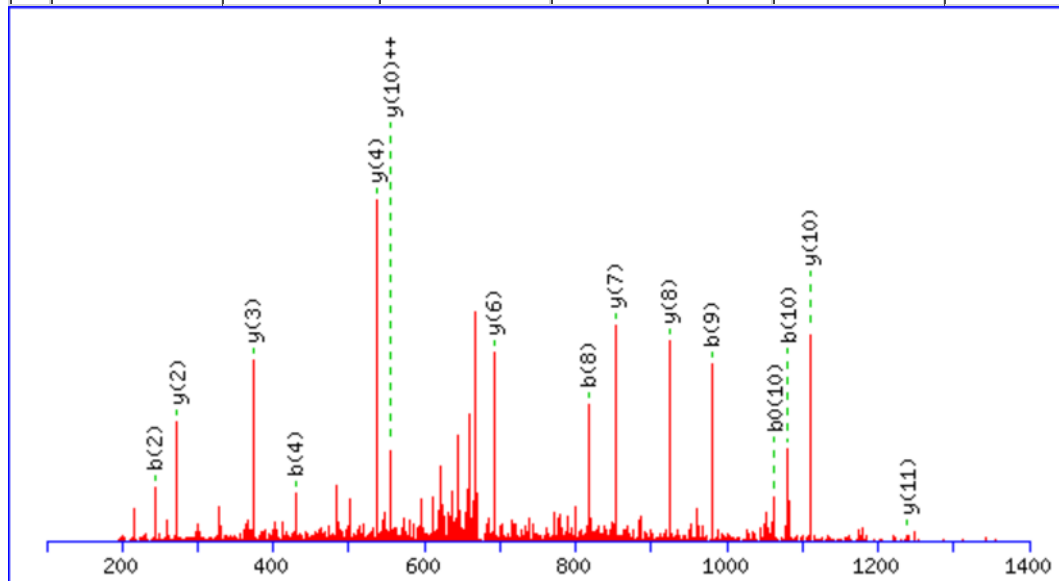

## Peptide View

MS/MS Fragmentation of **LWCATSNFDSKK**

Found in **IPI00027509**, Tax\_Id=9606 Gene\_Symbol=MMP9 Matrix metalloproteinase-9

**Experiment:** 30 - NOPE3 **Fraction:** NOPE3

Match to Query 11466: 1671.757248 from(836.885900,2+)

Title: OECHL100317\_35.10710.10710.2.dta

Data file \\Boromir\masse\Data LTQ-Orbitrap\Chrystelle Lacroix\Etude clinique sJPU\OECHL100317\_35.raw

**Monoisotopic mass of neutral peptide Mr(calc):** 1671.756271**Fixed modifications:** Carbamidomethyl (C) (apply to specified residues or termini only)**Ions**

**Score:** 51 **Expect:** 0.0006**Matches :** 16/130 fragment ions using 30 most intense peaks ([help](#))

| #  | b                  | b <sup>++</sup> | b*          | b* <sup>++</sup> | b <sup>0</sup> | b <sup>0++</sup> | Seq. | y                  | y <sup>++</sup>   | y*                | y* <sup>++</sup>  | y <sup>0</sup> | y <sup>0++</sup> |
|----|--------------------|-----------------|-------------|------------------|----------------|------------------|------|--------------------|-------------------|-------------------|-------------------|----------------|------------------|
| 1  | 114.091340         | 57.549308       |             |                  |                |                  | L    |                    |                   |                   |                   |                |                  |
| 2  | <b>300.170653</b>  | 150.588965      |             |                  |                |                  | W    | 1559.679484        | 780.343380        | 1542.652935       | 771.830106        | 1541.668919    | 771.3380         |
| 3  | <b>460.201302</b>  | 230.604289      |             |                  |                |                  | C    | <b>1373.600171</b> | <b>687.303724</b> | 1356.573622       | <b>678.790449</b> | 1355.589606    | <b>678.2984</b>  |
| 4  | 531.238416         | 266.122846      |             |                  |                |                  | A    | <b>1213.569522</b> | 607.288399        | 1196.542973       | 598.775125        | 1195.558957    | 598.2831         |
| 5  | 632.286095         | 316.646686      |             |                  | 614.275530     | 307.641403       | T    | <b>1142.532408</b> | 571.769842        | 1125.505859       | 563.256568        | 1124.521843    | 562.7645         |
| 6  | 733.333774         | 367.170525      |             |                  | 715.323209     | 358.165243       | T    | <b>1041.484729</b> | 521.246003        | 1024.458180       | 512.732728        | 1023.474164    | 512.2407         |
| 7  | 820.365802         | 410.686539      |             |                  | 802.355237     | 401.681257       | S    | <b>940.437050</b>  | 470.722163        | 923.410501        | 462.208889        | 922.426485     | 461.7168         |
| 8  | 934.408729         | 467.708003      | 917.382180  | 459.194728       | 916.398164     | 458.702720       | N    | <b>853.405022</b>  | 427.206149        | 836.378473        | 418.692875        | 835.394457     | 418.2008         |
| 9  | 1081.477143        | 541.242210      | 1064.450594 | 532.728935       | 1063.466578    | 532.236927       | F    | 739.362095         | 370.184686        | 722.335546        | 361.671411        | 721.351530     | 361.1794         |
| 10 | 1196.504086        | 598.755681      | 1179.477537 | 590.242407       | 1178.493521    | 589.750399       | D    | <b>592.293681</b>  | 296.650479        | 575.267132        | 288.137204        | 574.283116     | 287.6451         |
| 11 | 1283.536114        | 642.271695      | 1266.509565 | 633.758421       | 1265.525549    | 633.266413       | S    | <b>477.266738</b>  | 239.137007        | <b>460.240189</b> | 230.623733        | 459.256173     | 230.1317         |
| 12 | 1398.563057        | 699.785167      | 1381.536508 | 691.271892       | 1380.552492    | 690.779884       | D    | 390.234710         | 195.620993        | 373.208161        | 187.107719        | 372.224145     | 186.6157         |
| 13 | <b>1526.658020</b> | 763.832648      | 1509.631471 | 755.319374       | 1508.647455    | 754.827366       | K    | <b>275.207767</b>  | 138.107521        | 258.181218        | 129.594247        |                |                  |
| 14 |                    |                 |             |                  |                |                  | K    | 147.112804         | 74.060040         | 130.086255        | 65.546765         |                |                  |

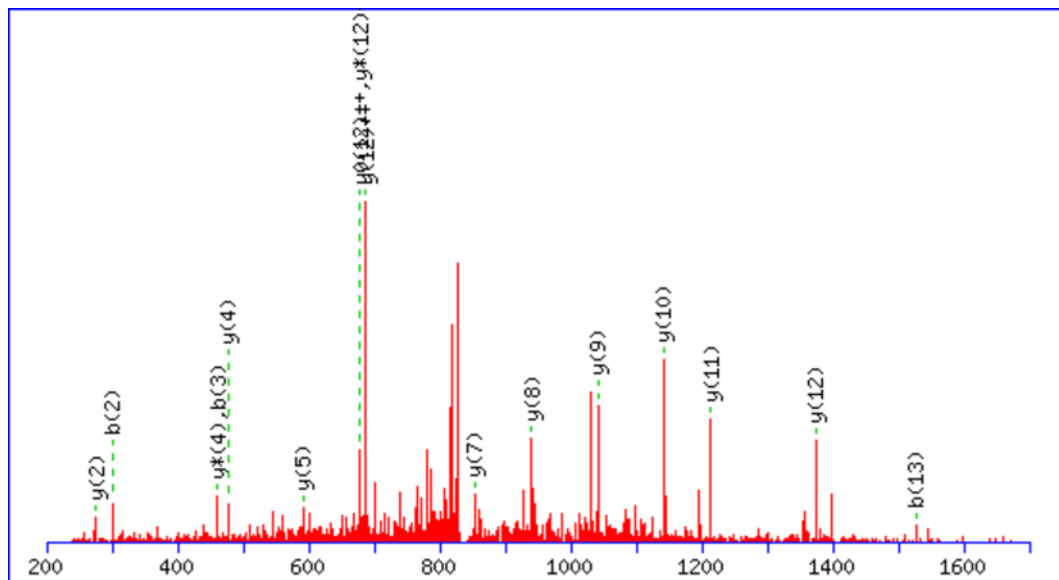

## Peptide View

### MS/MS Fragmentation of **VATQEGKEITCR**

Found in **IPI00031564**, Tax\_Id=9606 Gene\_Symbol=GGCT Isoform 1 of Gamma-glutamylcyclotransferase

**Experiment:** 30 - NOPE3 **Fraction:** NOPE3

Match to Query 8515: 1390.686448 from(696.350500,2+)

Title: OECHL100317\_35.3605.3605.2.dta

Data file \\Boromir\masse\Data LTQ-Orbitrap\Chrystelle Lacroix\Etude clinique sJPU\OECHL100317\_35.raw

**Monoisotopic mass of neutral peptide Mr(calc):** 1390.687454 **Fixed modifications:** Carbamidomethyl (C) (apply to specified residues or termini only) **Ions**

**Score:** 54 **Expect:** 0.00051 **Matches :** 23/118 fragment ions using 45 most intense peaks ([help](#))

| # | b          | b <sup>++</sup> | b*         | b <sup>*++</sup> | b <sup>0</sup> | b <sup>0++</sup> | Seq. | y           | y <sup>++</sup> | y*          | y <sup>*++</sup> | y <sup>0</sup> | y <sup>0++</sup> |
|---|------------|-----------------|------------|------------------|----------------|------------------|------|-------------|-----------------|-------------|------------------|----------------|------------------|
| 1 | 100.075690 | 50.541483       |            |                  |                |                  | V    |             |                 |             |                  |                |                  |
| 2 | 171.112804 | 86.060040       |            |                  |                |                  | A    | 1292.626328 | 646.816802      | 1275.599779 | 638.303528       | 1274.615763    | 637.8115         |
| 3 | 272.160483 | 136.583879      |            |                  | 254.149918     | 127.578597       | T    | 1221.589214 | 611.298245      | 1204.562665 | 602.784971       | 1203.578649    | 602.2929         |
| 4 | 400.219061 | 200.613169      | 383.192512 | 192.099894       | 382.208496     | 191.607886       | Q    | 1120.541535 | 560.774406      | 1103.514986 | 552.261131       | 1102.530970    | 551.7691         |
| 5 | 529.261654 | 265.134465      | 512.235105 | 256.621191       | 511.251089     | 256.129183       | E    | 992.482957  | 496.745117      | 975.456408  | 488.231842       | 974.472392     | 487.7398         |



|    |             |            |             |            |             |            |   |            |            |            |            |            |          |
|----|-------------|------------|-------------|------------|-------------|------------|---|------------|------------|------------|------------|------------|----------|
| 6  | 586.283118  | 293.645197 | 569.256569  | 285.131923 | 568.272553  | 284.639915 | G | 863.440364 | 432.223820 | 846.413815 | 423.710546 | 845.429799 | 423.2185 |
| 7  | 714.378081  | 357.692679 | 697.351532  | 349.179404 | 696.367516  | 348.687396 | K | 806.418900 | 403.713088 | 789.392351 | 395.199814 | 788.408335 | 394.7078 |
| 8  | 843.420674  | 422.213975 | 826.394125  | 413.700701 | 825.410109  | 413.208693 | E | 678.323937 | 339.665607 | 661.297388 | 331.152332 | 660.313372 | 330.6603 |
| 9  | 956.504738  | 478.756007 | 939.478189  | 470.242733 | 938.494173  | 469.750725 | I | 549.281344 | 275.144310 | 532.254795 | 266.631036 | 531.270779 | 266.1390 |
| 10 | 1057.552417 | 529.279847 | 1040.525868 | 520.766572 | 1039.541852 | 520.274564 | T | 436.197280 | 218.602278 | 419.170731 | 210.089003 | 418.186715 | 209.5969 |
| 11 | 1217.583066 | 609.295171 | 1200.556517 | 600.781897 | 1199.572501 | 600.289889 | C | 335.149601 | 168.078438 | 318.123052 | 159.565164 |            |          |
| 12 |             |            |             |            |             |            | R | 175.118952 | 88.063114  | 158.092403 | 79.549839  |            |          |

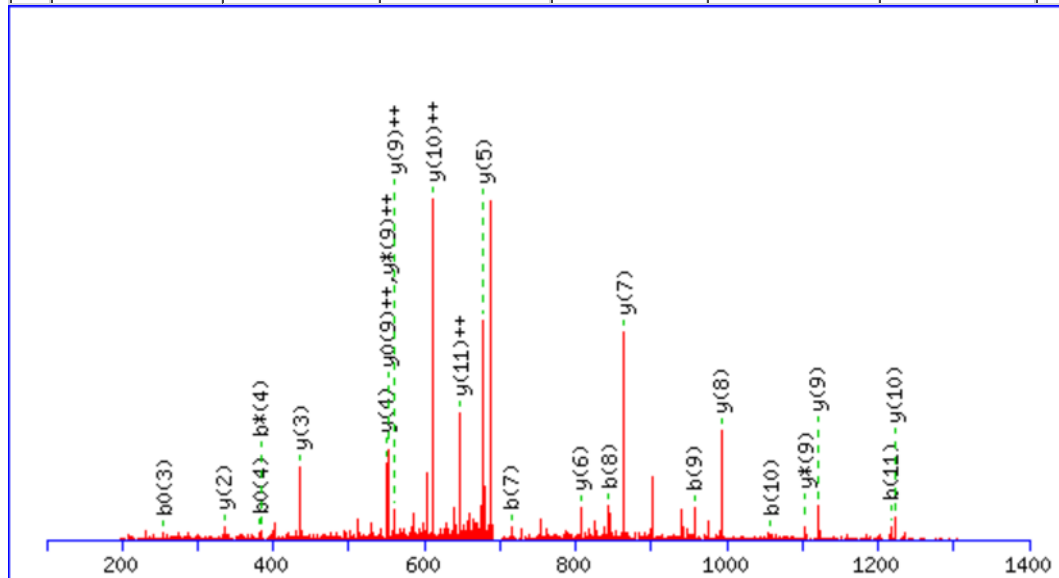

## Peptide View

MS/MS Fragmentation of **ITCAEEGWSPTPK**

Found in **IPI0006154**, Tax\_Id=9606 Gene\_Symbol=CFHR2 Isoform Long of Complement factor H-related protein 2

**Experiment:** 30 - NOPE3 **Fraction:** NOPE3

Match to Query 9383: 1474.682048 from(738.348300,2+)

Title: OECHL100317\_35.10220.10220.2.dta

Data file \\Boromir\masse\Data LTQ-Orbitrap\Chrystelle Lacroix\Etude clinique sJPU\OECHL100317\_35.raw

**Monoisotopic mass of neutral peptide Mr(calc):** 1474.676224 **Fixed modifications:** Carbamidomethyl (C) (apply to specified residues or termini only) **Ions**

Score: 50 Expect: 0.001Matches : 29/114 fragment ions using 75 most intense peaks ([help](#))

| #  | b           | b <sup>++</sup> | b <sup>0</sup> | b <sup>0++</sup> | Seq. | y           | y <sup>++</sup> | y*          | y* <sup>++</sup> | y <sup>0</sup> | y <sup>0++</sup> | #  |
|----|-------------|-----------------|----------------|------------------|------|-------------|-----------------|-------------|------------------|----------------|------------------|----|
| 1  | 114.091340  | 57.549308       |                |                  | I    |             |                 |             |                  |                |                  | 13 |
| 2  | 215.139019  | 108.073147      | 197.128454     | 99.067865        | T    | 1362.599444 | 681.803360      | 1345.572895 | 673.290086       | 1344.588879    | 672.798078       | 12 |
| 3  | 375.169668  | 188.088472      | 357.159103     | 179.083190       | C    | 1261.551765 | 631.279521      | 1244.525216 | 622.766246       | 1243.541200    | 622.274238       | 11 |
| 4  | 446.206782  | 223.607029      | 428.196217     | 214.601747       | A    | 1101.521116 | 551.264196      | 1084.494567 | 542.750922       | 1083.510551    | 542.258914       | 10 |
| 5  | 575.249375  | 288.128326      | 557.238810     | 279.123043       | E    | 1030.484002 | 515.745639      | 1013.457453 | 507.232365       | 1012.473437    | 506.740357       | 9  |
| 6  | 704.291968  | 352.649622      | 686.281403     | 343.644340       | E    | 901.441409  | 451.224343      | 884.414860  | 442.711068       | 883.430844     | 442.219060       | 8  |
| 7  | 761.313432  | 381.160354      | 743.302867     | 372.155072       | G    | 772.398816  | 386.703046      | 755.372267  | 378.189772       | 754.388251     | 377.697764       | 7  |
| 8  | 947.392745  | 474.200011      | 929.382180     | 465.194728       | W    | 715.377352  | 358.192314      | 698.350803  | 349.679040       | 697.366787     | 349.187032       | 6  |
| 9  | 1034.424773 | 517.716025      | 1016.414208    | 508.710742       | S    | 529.298039  | 265.152658      | 512.271490  | 256.639383       | 511.287474     | 256.147375       | 5  |
| 10 | 1131.477537 | 566.242407      | 1113.466972    | 557.237124       | P    | 442.266011  | 221.636644      | 425.239462  | 213.123369       | 424.255446     | 212.631361       | 4  |
| 11 | 1232.525216 | 616.766246      | 1214.514651    | 607.760964       | T    | 345.213247  | 173.110262      | 328.186698  | 164.596987       | 327.202682     | 164.104979       | 3  |
| 12 | 1329.577980 | 665.292628      | 1311.567415    | 656.287346       | P    | 244.165568  | 122.586422      | 227.139019  | 114.073148       |                |                  | 2  |
| 13 |             |                 |                |                  | K    | 147.112804  | 74.060040       | 130.086255  | 65.546765        |                |                  | 1  |

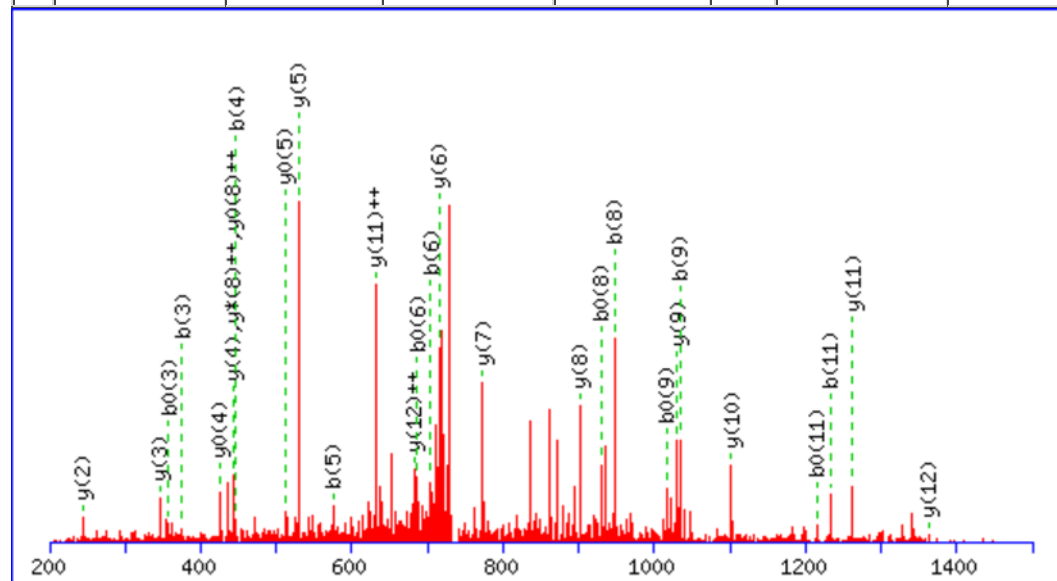

## Peptide View

MS/MS Fragmentation of **SAYVSYDVQKR**Found in **IPI00395903**, Tax\_Id=9606 Gene\_Symbol=TMEM106B Transmembrane protein 106B**Experiment:** 30 - NOPE3 **Fraction:** NOPE3

Match to Query 7820: 1314.658848 from(658.336700,2+)

Title: OECHL100317\_35.6668.6668.2.dta

Data file \\Boromir\masse\Data LTQ-Orbitrap\Chrystelle Lacroix\Etude clinique sJPU\OECHL100317\_35.raw

**Monoisotopic mass of neutral peptide Mr(calc):** 1314.656799**Fixed modifications:** Carbamidomethyl (C) (apply to specified residues or termini only)**Ions****Score:** 49 **Expect:** 0.0015**Matches :** 17/96 fragment ions using 33 most intense peaks ([help](#))

| #  | b                 | b <sup>++</sup> | b*          | b <sup>*++</sup> | b <sup>0</sup>    | b <sup>0++</sup>  | Seq. | y                  | y <sup>++</sup>   | y*                | y <sup>*++</sup> | y <sup>0</sup> | y <sup>0++</sup> |
|----|-------------------|-----------------|-------------|------------------|-------------------|-------------------|------|--------------------|-------------------|-------------------|------------------|----------------|------------------|
| 1  | 88.039304         | 44.523290       |             |                  | 70.028739         | 35.518008         | S    |                    |                   |                   |                  |                |                  |
| 2  | 159.076418        | 80.041847       |             |                  | 141.065853        | 71.036564         | A    | 1228.632064        | 614.819670        | 1211.605515       | 606.306396       | 1210.621499    | 605.8143         |
| 3  | <b>322.139747</b> | 161.573512      |             |                  | 304.129182        | 152.568229        | Y    | <b>1157.594950</b> | <b>579.301113</b> | 1140.568401       | 570.787839       | 1139.584385    | 570.2958         |
| 4  | <b>421.208161</b> | 211.107719      |             |                  | 403.197596        | 202.102436        | V    | <b>994.531621</b>  | <b>497.769449</b> | 977.505072        | 489.256174       | 976.521056     | 488.7641         |
| 5  | 508.240189        | 254.623733      |             |                  | 490.229624        | 245.618450        | S    | <b>895.463207</b>  | <b>448.235242</b> | <b>878.436658</b> | 439.721967       | 877.452642     | 439.2299         |
| 6  | 671.303518        | 336.155397      |             |                  | 653.292953        | 327.150115        | Y    | <b>808.431179</b>  | 404.719228        | 791.404630        | 396.205953       | 790.420614     | 395.7139         |
| 7  | 786.330461        | 393.668869      |             |                  | 768.319896        | 384.663586        | D    | <b>645.367850</b>  | <b>323.187563</b> | 628.341301        | 314.674289       | 627.357285     | 314.1822         |
| 8  | 885.398875        | 443.203076      |             |                  | 867.388310        | 434.197793        | V    | <b>530.340907</b>  | 265.674092        | 513.314358        | 257.160817       |                |                  |
| 9  | 1013.457453       | 507.232365      | 996.430904  | 498.719090       | <b>995.446888</b> | <b>498.227082</b> | Q    | <b>431.272493</b>  | 216.139885        | 414.245944        | 207.626610       |                |                  |
| 10 | 1141.552416       | 571.279846      | 1124.525867 | 562.766572       | 1123.541851       | 562.274564        | K    | <b>303.213915</b>  | 152.110596        | 286.187366        | 143.597321       |                |                  |
| 11 |                   |                 |             |                  |                   |                   | R    | 175.118952         | 88.063114         | 158.092403        | 79.549839        |                |                  |

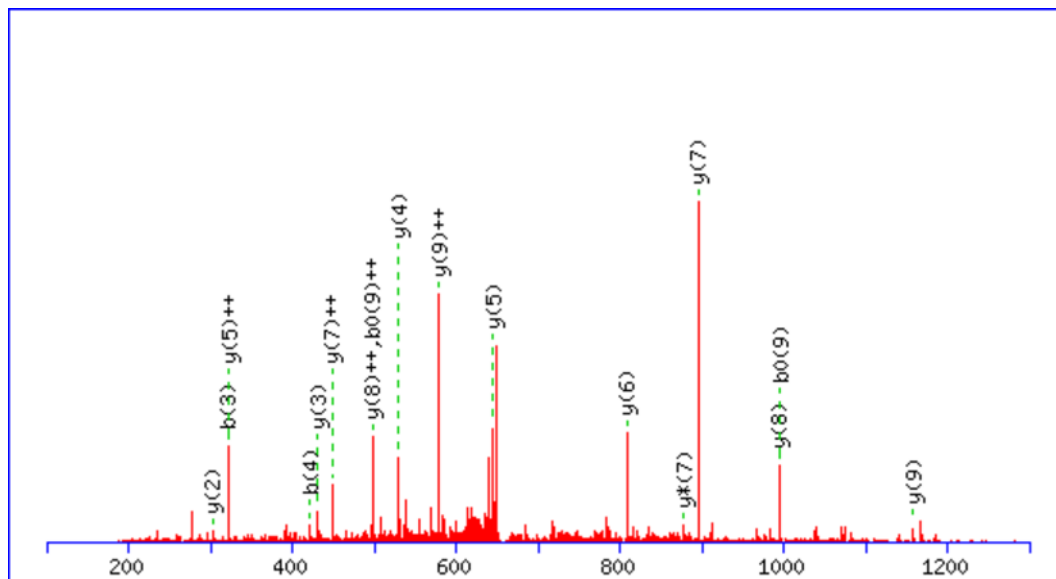

## Peptide View

MS/MS Fragmentation of **CQCPAGAALQADGR**

Found in **IPI00010737**, Tax\_Id=9606 Gene\_Symbol=THBD Thrombomodulin

Experiment: 42 - OPD-3 Fraction: OPD-3

Match to Query 8920: 1473.645448 from(737.830000,2+)

Title: OECHL100317\_33.7665.7665.2.dta

Data file \\Boromir\masse\Data LTQ-Orbitrap\Chrystelle Lacroix\Etude clinique sJPU\OECHL100317\_33.raw

**Monoisotopic mass of neutral peptide Mr(calc):** 1473.645279 **Fixed modifications:** Carbamidomethyl (C) (apply to specified residues or termini only) **Ions**

**Score:** 72 **Expect:** 3.1e-006 **Matches :** 29/128 fragment ions using 50 most intense peaks ([help](#))

| # | b                 | b <sup>++</sup> | b*                | b <sup>*++</sup> | b <sup>0</sup> | b <sup>0++</sup> | Seq. | y                  | y <sup>++</sup>   | y*                | y <sup>*++</sup> | y <sup>0</sup> | y <sup>0++</sup> |
|---|-------------------|-----------------|-------------------|------------------|----------------|------------------|------|--------------------|-------------------|-------------------|------------------|----------------|------------------|
| 1 | 161.037925        | 81.022600       |                   |                  |                |                  | C    |                    |                   |                   |                  |                |                  |
| 2 | <b>289.096503</b> | 145.051890      | <b>272.069954</b> | 136.538615       |                |                  | Q    | 1314.621912        | 657.814594        | 1297.595363       | 649.301320       | 1296.611347    | 648.8093         |
| 3 | <b>449.127152</b> | 225.067214      | 432.100603        | 216.553940       |                |                  | C    | <b>1186.563334</b> | <b>593.785305</b> | 1169.536785       | 585.272031       | 1168.552769    | 584.7800         |
| 4 | <b>546.179916</b> | 273.593596      | <b>529.153367</b> | 265.080322       |                |                  | P    | <b>1026.532685</b> | 513.769981        | 1009.506136       | 505.256706       | 1008.522120    | 504.7646         |
| 5 | <b>617.217030</b> | 309.112153      | 600.190481        | 300.598879       |                |                  | A    | <b>929.479921</b>  | 465.243599        | <b>912.453372</b> | 456.730324       | 911.469356     | 456.2383         |

|    |             |            |             |            |             |            |   |            |            |            |            |            |          |
|----|-------------|------------|-------------|------------|-------------|------------|---|------------|------------|------------|------------|------------|----------|
| 6  | 674.238494  | 337.622885 | 657.211945  | 329.109611 |             |            | G | 858.442807 | 429.725042 | 841.416258 | 421.211767 | 840.432242 | 420.7197 |
| 7  | 745.275608  | 373.141442 | 728.249059  | 364.628168 |             |            | A | 801.421343 | 401.214310 | 784.394794 | 392.701035 | 783.410778 | 392.2090 |
| 8  | 816.312722  | 408.659999 | 799.286173  | 400.146725 |             |            | A | 730.384229 | 365.695753 | 713.357680 | 357.182478 | 712.373664 | 356.6904 |
| 9  | 929.396786  | 465.202031 | 912.370237  | 456.688757 |             |            | L | 659.347115 | 330.177196 | 642.320566 | 321.663921 | 641.336550 | 321.1719 |
| 10 | 1057.455364 | 529.231320 | 1040.428815 | 520.718046 |             |            | Q | 546.263051 | 273.635164 | 529.236502 | 265.121889 | 528.252486 | 264.6298 |
| 11 | 1128.492478 | 564.749877 | 1111.465929 | 556.236603 |             |            | A | 418.204473 | 209.605874 | 401.177924 | 201.092600 | 400.193908 | 200.6005 |
| 12 | 1243.519421 | 622.263349 | 1226.492872 | 613.750074 | 1225.508856 | 613.258066 | D | 347.167359 | 174.087317 | 330.140810 | 165.574043 | 329.156794 | 165.0820 |
| 13 | 1300.540885 | 650.774081 | 1283.514336 | 642.260806 | 1282.530320 | 641.768798 | G | 232.140416 | 116.573846 | 215.113867 | 108.060571 |            |          |
| 14 |             |            |             |            |             |            | R | 175.118952 | 88.063114  | 158.092403 | 79.549839  |            |          |

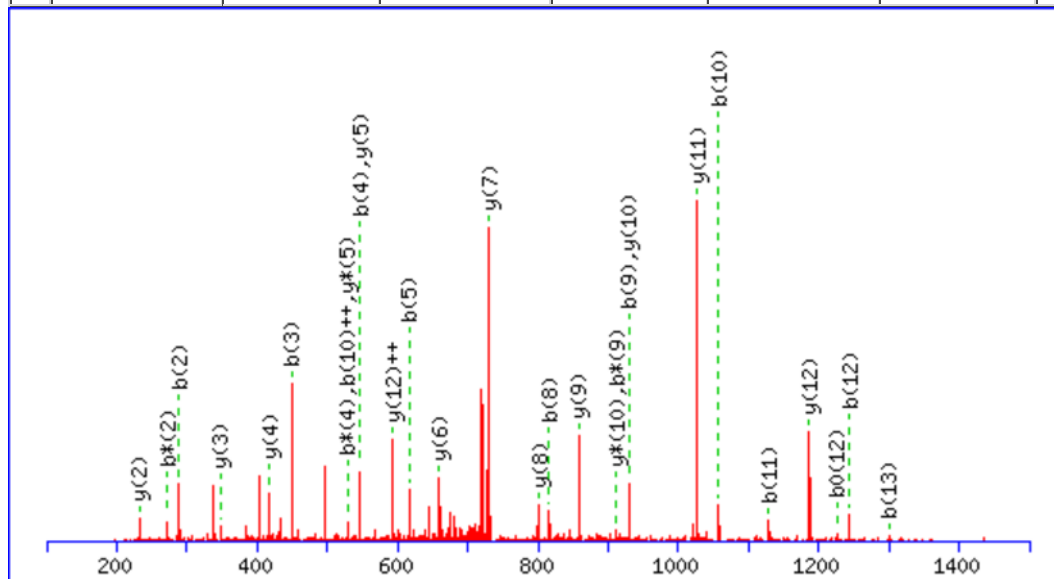

## Peptide View

MS/MS Fragmentation of **LLIYDASNLETGVPSR**

Found in **IPI00003111**, Tax\_Id=9606 Gene\_Symbol=LOC652694 Ig kappa chain V-I region AU

Experiment: 42 - OPD-3 Fraction: OPD-3

Match to Query 11399: 1746.915648 from(874.465100,2+)

Title: OECHL100317\_33.16649.16649.2.dta

Data file \\Boromir\masse\Data LTQ-Orbitrap\Chrystelle Lacroix\Etude clinique sJPU\OECHL100317\_33.raw

**Monoisotopic mass of neutral peptide Mr(calc):** 1746.915192**Fixed modifications:** Carbamidomethyl (C) (apply to specified residues or termini only)**Ions****Score:** 83 **Expect:** 5.5e-007**Matches :** 30/156 fragment ions using 44 most intense peaks ([help](#))

| #  | b                  | b <sup>++</sup>   | b <sup>*</sup>     | b <sup>*++</sup> | b <sup>0</sup>     | b <sup>0++</sup> | Seq. | y                  | y <sup>++</sup> | y <sup>*</sup>    | y <sup>*++</sup>  | y <sup>0</sup>     | y <sup>0++</sup> |
|----|--------------------|-------------------|--------------------|------------------|--------------------|------------------|------|--------------------|-----------------|-------------------|-------------------|--------------------|------------------|
| 1  | 114.091340         | 57.549308         |                    |                  |                    |                  | L    |                    |                 |                   |                   |                    |                  |
| 2  | 227.175404         | 114.091340        |                    |                  |                    |                  | L    | 1634.838427        | 817.922852      | 1617.811878       | 809.409577        | 1616.827862        | 808.9175         |
| 3  | 340.259468         | 170.633372        |                    |                  |                    |                  | I    | <b>1521.754363</b> | 761.380820      | 1504.727814       | <b>752.867545</b> | 1503.743798        | <b>752.3755</b>  |
| 4  | 503.322797         | 252.165036        |                    |                  |                    |                  | Y    | 1408.670299        | 704.838788      | 1391.643750       | 696.325513        | <b>1390.659734</b> | 695.8335         |
| 5  | <b>618.349740</b>  | 309.678508        |                    |                  | 600.339175         | 300.673226       | D    | <b>1245.606970</b> | 623.307123      | 1228.580421       | 614.793849        | 1227.596405        | 614.3018         |
| 6  | <b>689.386854</b>  | 345.197065        |                    |                  | 671.376289         | 336.191782       | A    | <b>1130.580027</b> | 565.793652      | 1113.553478       | 557.280377        | 1112.569462        | 556.7883         |
| 7  | 776.418882         | 388.713079        |                    |                  | 758.408317         | 379.707796       | S    | <b>1059.542913</b> | 530.275095      | 1042.516364       | 521.761820        | 1041.532348        | 521.2698         |
| 8  | 890.461809         | 445.734542        | <b>873.435260</b>  | 437.221268       | 872.451244         | 436.729260       | N    | <b>972.510885</b>  | 486.759081      | 955.484336        | 478.245806        | 954.500320         | 477.7537         |
| 9  | <b>1003.545873</b> | 502.276574        | <b>986.519324</b>  | 493.763300       | 985.535308         | 493.271292       | L    | <b>858.467958</b>  | 429.737617      | 841.441409        | 421.224343        | 840.457393         | 420.7323         |
| 10 | <b>1132.588466</b> | 566.797871        | 1115.561917        | 558.284597       | 1114.577901        | 557.792588       | E    | <b>745.383894</b>  | 373.195585      | 728.357345        | 364.682311        | 727.373329         | 364.1903         |
| 11 | <b>1233.636145</b> | <b>617.321710</b> | 1216.609596        | 608.808436       | 1215.625580        | 608.316428       | T    | <b>616.341301</b>  | 308.674289      | 599.314752        | 300.161014        | 598.330736         | 299.6690         |
| 12 | <b>1290.657609</b> | 645.832442        | 1273.631060        | 637.319168       | <b>1272.647044</b> | 636.827160       | G    | <b>515.293622</b>  | 258.150449      | 498.267073        | 249.637175        | 497.283057         | 249.1451         |
| 13 | <b>1389.726023</b> | 695.366649        | <b>1372.699474</b> | 686.853375       | 1371.715458        | 686.361367       | V    | <b>458.272158</b>  | 229.639717      | 441.245609        | 221.126443        | 440.261593         | 220.6344         |
| 14 | <b>1486.778787</b> | 743.893032        | 1469.752238        | 735.379757       | 1468.768222        | 734.887749       | P    | <b>359.203744</b>  | 180.105510      | <b>342.177195</b> | 171.592236        | <b>341.193179</b>  | 171.1002         |
| 15 | <b>1573.810815</b> | 787.409046        | 1556.784266        | 778.895771       | 1555.800250        | 778.403763       | S    | 262.150980         | 131.579128      | 245.124431        | 123.065854        | 244.140415         | 122.5738         |
| 16 |                    |                   |                    |                  |                    |                  | R    | 175.118952         | 88.063114       | 158.092403        | 79.549839         |                    |                  |

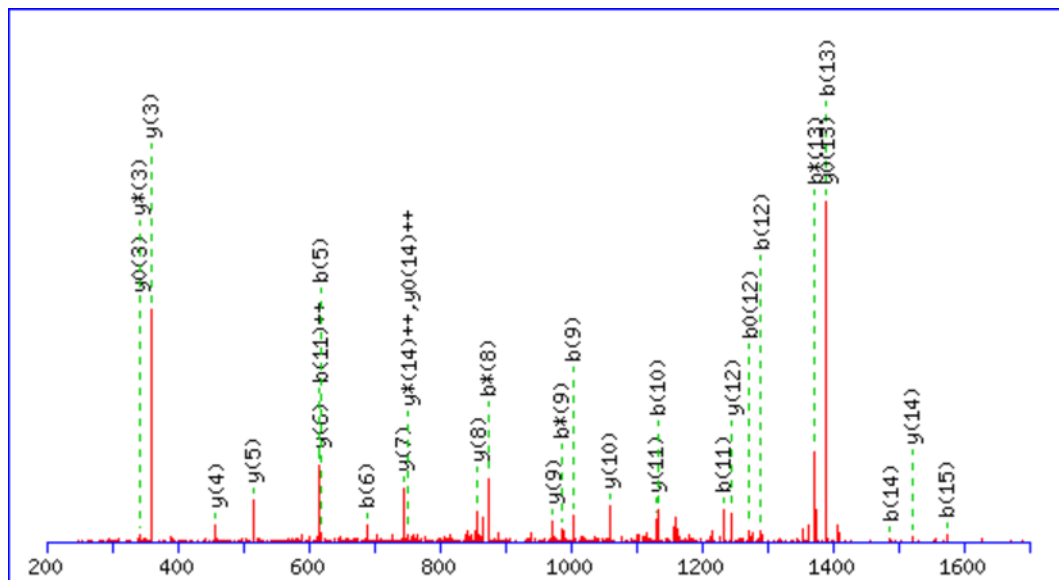

## Peptide View

MS/MS Fragmentation of **YCCAAADAR**

Found in **IPI00455600**, Tax\_Id=9606 Gene\_Symbol=SHISA3 Protein shisa-3 homolog

**Experiment:** 42 - OPD-3 **Fraction:** OPD-3

Match to Query 3846: 1056.411248 from(529.212900,2+)

Title: OECHL100317\_33.3257.3257.2.dta

Data file \\Boromir\masse\Data LTQ-Orbitrap\Chrystelle Lacroix\Etude clinique sJPU\OECHL100317\_33.raw

**Monoisotopic mass of neutral peptide Mr(calc):** 1056.411682 **Fixed modifications:** Carbamidomethyl (C) (apply to specified residues or termini only) **Ions**

**Score:** 59 **Expect:** 8.8e-006 **Matches :** 14/64 fragment ions using 27 most intense peaks ([help](#))

| # | b                 | b <sup>++</sup> | b <sup>0</sup> | b <sup>0++</sup> | Seq. | y                 | y <sup>++</sup>   | y <sup>*</sup> | y <sup>*++</sup> | y <sup>0</sup> | y <sup>0++</sup> | # |
|---|-------------------|-----------------|----------------|------------------|------|-------------------|-------------------|----------------|------------------|----------------|------------------|---|
| 1 | 164.070605        | 82.538940       |                |                  | Y    |                   |                   |                |                  |                |                  | 9 |
| 2 | <b>324.101254</b> | 162.554265      |                |                  | C    | <b>894.355649</b> | <b>447.681462</b> | 877.329100     | 439.168188       | 876.345084     | 438.676180       | 8 |
| 3 | <b>484.131903</b> | 242.569590      |                |                  | C    | <b>734.325000</b> | 367.666138        | 717.298451     | 359.152863       | 716.314435     | 358.660855       | 7 |
| 4 | 555.169017        | 278.088147      |                |                  | A    | <b>574.294351</b> | 287.650813        | 557.267802     | 279.137539       | 556.283786     | 278.645531       | 6 |
| 5 | 626.206131        | 313.606704      |                |                  | A    | <b>503.257237</b> | 252.132256        | 486.230688     | 243.618982       | 485.246672     | 243.126974       | 5 |

|   |            |            |            |            |   |            |            |            |            |            |            |   |
|---|------------|------------|------------|------------|---|------------|------------|------------|------------|------------|------------|---|
| 6 | 697.243245 | 349.125261 |            |            | A | 432.220123 | 216.613699 | 415.193574 | 208.100425 | 414.209558 | 207.608417 | 4 |
| 7 | 812.270188 | 406.638732 | 794.259623 | 397.633449 | D | 361.183009 | 181.095142 | 344.156460 | 172.581868 | 343.172444 | 172.089860 | 3 |
| 8 | 883.307302 | 442.157289 | 865.296737 | 433.152006 | A | 246.156066 | 123.581671 | 229.129517 | 115.068396 |            |            | 2 |
| 9 |            |            |            |            | R | 175.118952 | 88.063114  | 158.092403 | 79.549839  |            |            | 1 |

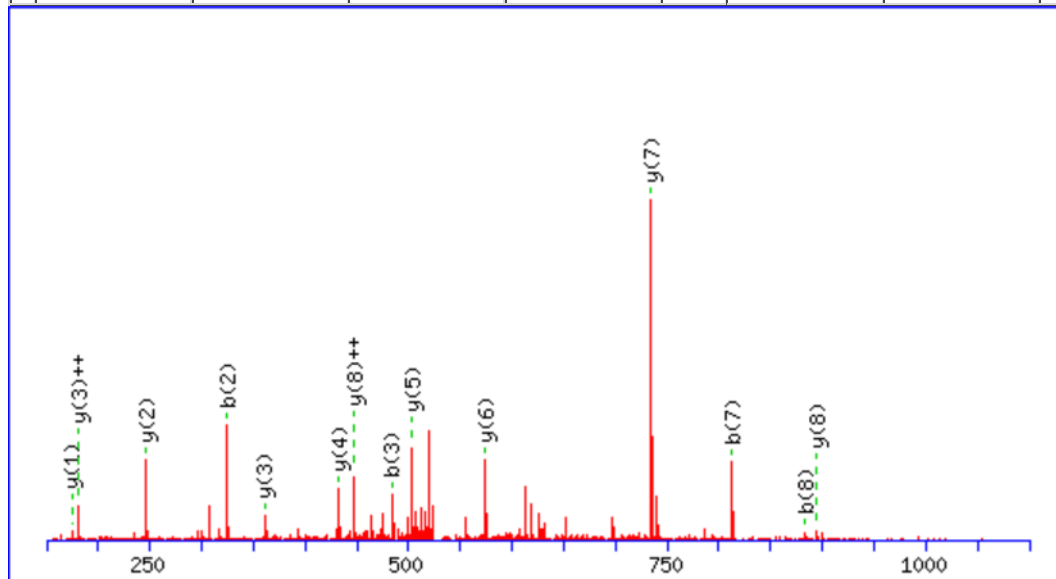

## Peptide View

MS/MS Fragmentation of **LQDASAEVER**

Found in **IPI00026241**, Tax\_Id=9606 Gene\_Symbol=BST2 Bone marrow stromal antigen 2

**Experiment:** 42 - OPD-3 **Fraction:** OPD-3

Match to Query 4616: 1116.543048 from(559.278800,2+)

Title: OECHL100317\_33.4897.4897.2.dta

Data file \\Boromir\masse\Data LTQ-Orbitrap\Chrystelle Lacroix\Etude clinique sJPU\OECHL100317\_33.raw

**Monoisotopic mass of neutral peptide Mr(calc):** 1116.541092 **Fixed modifications:** Carbamidomethyl (C) (apply to specified residues or termini only) **Ions**

**Score:** 55 **Expect:** 0.00034 **Matches :** 20/100 fragment ions using 47 most intense peaks ([help](#))

| # | b          | b <sup>++</sup> | b* | b <sup>*++</sup> | b <sup>0</sup> | b <sup>0++</sup> | Seq. | y | y <sup>++</sup> | y* | y <sup>*++</sup> | y <sup>0</sup> | y <sup>0++</sup> | #  |
|---|------------|-----------------|----|------------------|----------------|------------------|------|---|-----------------|----|------------------|----------------|------------------|----|
| 1 | 114.091340 | 57.549308       |    |                  |                |                  | L    |   |                 |    |                  |                |                  | 10 |



|    |                   |            |                   |            |            |            |   |                    |            |                   |            |                   |            |   |
|----|-------------------|------------|-------------------|------------|------------|------------|---|--------------------|------------|-------------------|------------|-------------------|------------|---|
| 2  | <b>242.149918</b> | 121.578597 | <b>225.123369</b> | 113.065323 |            |            | Q | <b>1004.464329</b> | 502.735803 | <b>987.437780</b> | 494.222528 | 986.453764        | 493.730520 | 9 |
| 3  | <b>357.176861</b> | 179.092069 | 340.150312        | 170.578794 | 339.166296 | 170.086786 | D | <b>876.405751</b>  | 438.706514 | 859.379202        | 430.193239 | <b>858.395186</b> | 429.701231 | 8 |
| 4  | <b>428.213975</b> | 214.610626 | <b>411.187426</b> | 206.097351 | 410.203410 | 205.605343 | A | <b>761.378808</b>  | 381.193042 | 744.352259        | 372.679767 | 743.368243        | 372.187759 | 7 |
| 5  | 515.246003        | 258.126640 | 498.219454        | 249.613365 | 497.235438 | 249.121357 | S | <b>690.341694</b>  | 345.674485 | 673.315145        | 337.161210 | 672.331129        | 336.669202 | 6 |
| 6  | <b>586.283117</b> | 293.645197 | 569.256568        | 285.131922 | 568.272552 | 284.639914 | A | <b>603.309666</b>  | 302.158471 | <b>586.283117</b> | 293.645197 | 585.299101        | 293.153189 | 5 |
| 7  | <b>715.325710</b> | 358.166493 | 698.299161        | 349.653219 | 697.315145 | 349.161211 | E | <b>532.272552</b>  | 266.639914 | 515.246003        | 258.126640 | 514.261987        | 257.634632 | 4 |
| 8  | 814.394124        | 407.700700 | 797.367575        | 399.187426 | 796.383559 | 398.695418 | V | <b>403.229959</b>  | 202.118617 | 386.203410        | 193.605343 | 385.219394        | 193.113335 | 3 |
| 9  | <b>943.436717</b> | 472.221997 | 926.410168        | 463.708722 | 925.426152 | 463.216714 | E | <b>304.161545</b>  | 152.584410 | 287.134996        | 144.071136 | 286.150980        | 143.579128 | 2 |
| 10 |                   |            |                   |            |            |            | R | <b>175.118952</b>  | 88.063114  | 158.092403        | 79.549839  |                   |            | 1 |

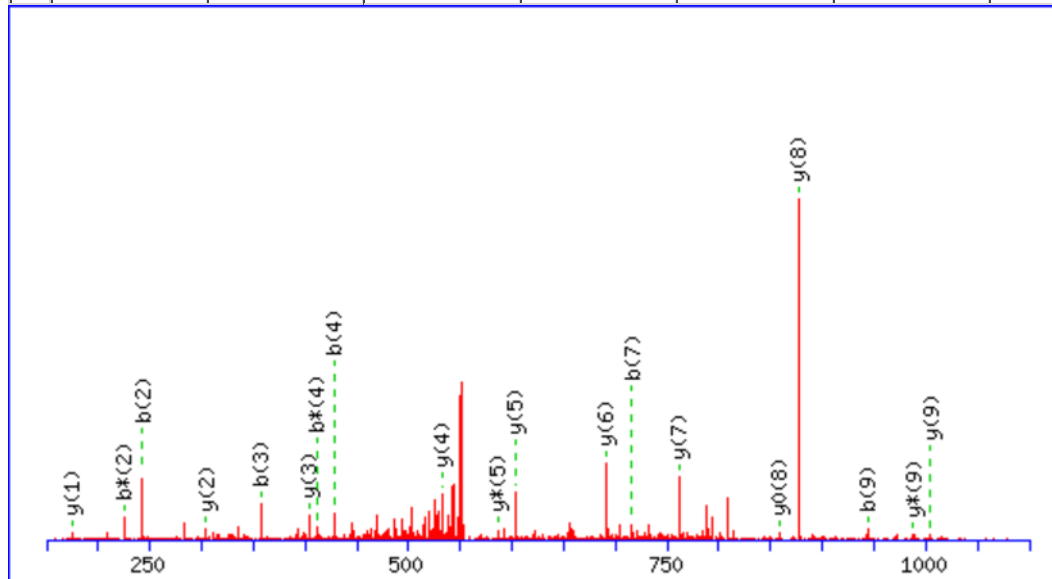

## Peptide View

MS/MS Fragmentation of **IGDKLDIICPR**

Found in **IPI00024307**, Tax\_Id=9606 Gene\_Symbol=EFNB1 Ephrin-B1

Experiment: 42 - OPD-3 Fraction: OPD-3

Match to Query 7433: 1298.701848 from(650.358200,2+)

Title: OECHL100317\_33.12507.12507.2.dta

Data file \\Boromir\masse\Data LTQ-Orbitrap\Chrystelle Lacroix\Etude clinique sJPU\OECHL100317\_33.raw

**Monoisotopic mass of neutral peptide Mr(calc): 1298.701645**Fixed modifications: Carbamidomethyl (C) (apply to specified residues or termini only)**Ions****Score: 62** **Expect: 6.3e-005** **Matches : 11/100** fragment ions using 12 most intense peaks ([help](#))

| #  | b                  | b <sup>++</sup> | b*          | b <sup>*++</sup> | b <sup>0</sup> | b <sup>0++</sup> | Seq. | y                  | y <sup>++</sup> | y*                | y <sup>*++</sup> | y <sup>0</sup>    | y <sup>0++</sup> |
|----|--------------------|-----------------|-------------|------------------|----------------|------------------|------|--------------------|-----------------|-------------------|------------------|-------------------|------------------|
| 1  | 114.091340         | 57.549308       |             |                  |                |                  | I    |                    |                 |                   |                  |                   |                  |
| 2  | 171.112804         | 86.060040       |             |                  |                |                  | G    | <b>1186.624870</b> | 593.816073      | 1169.598321       | 585.302799       | 1168.614305       | 584.8107         |
| 3  | 286.139747         | 143.573512      |             |                  | 268.129182     | 134.568229       | D    | <b>1129.603406</b> | 565.305341      | 1112.576857       | 556.792067       | 1111.592841       | 556.3000         |
| 4  | 414.234710         | 207.620993      | 397.208161  | 199.107719       | 396.224145     | 198.615711       | K    | 1014.576463        | 507.791870      | 997.549914        | 499.278595       | 996.565898        | 498.7865         |
| 5  | 527.318774         | 264.163025      | 510.292225  | 255.649751       | 509.308209     | 255.157743       | L    | <b>886.481500</b>  | 443.744388      | 869.454951        | 435.231113       | <b>868.470935</b> | 434.7391         |
| 6  | 642.345717         | 321.676497      | 625.319168  | 313.163222       | 624.335152     | 312.671214       | D    | <b>773.397436</b>  | 387.202356      | 756.370887        | 378.689081       | 755.386871        | 378.1970         |
| 7  | 755.429781         | 378.218529      | 738.403232  | 369.705254       | 737.419216     | 369.213246       | I    | 658.370493         | 329.688885      | <b>641.343944</b> | 321.175610       |                   |                  |
| 8  | <b>868.513845</b>  | 434.760561      | 851.487296  | 426.247286       | 850.503280     | 425.755278       | I    | <b>545.286429</b>  | 273.146853      | 528.259880        | 264.633578       |                   |                  |
| 9  | <b>1028.544494</b> | 514.775885      | 1011.517945 | 506.262610       | 1010.533929    | 505.770603       | C    | <b>432.202365</b>  | 216.604820      | 415.175816        | 208.091546       |                   |                  |
| 10 | 1125.597258        | 563.302267      | 1108.570709 | 554.788993       | 1107.586693    | 554.296985       | P    | <b>272.171716</b>  | 136.589496      | 255.145167        | 128.076221       |                   |                  |
| 11 |                    |                 |             |                  |                |                  | R    | 175.118952         | 88.063114       | 158.092403        | 79.549839        |                   |                  |

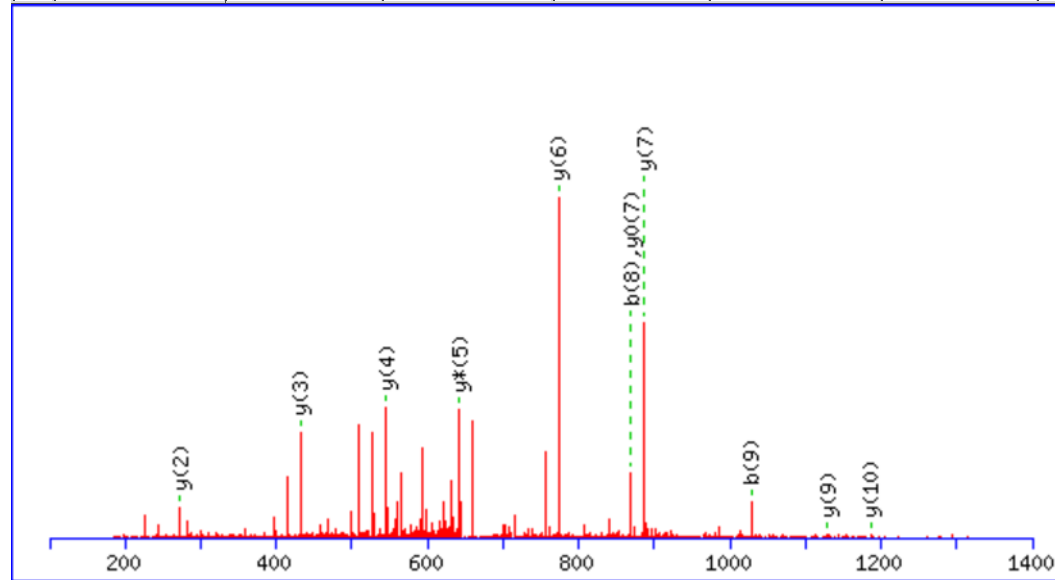

## Peptide View

MS/MS Fragmentation of **TGAVYVAEIGAK**Found in **IPI00552937**, Tax\_Id=9606 Gene\_Symbol=NHLRC3 NHL repeat-containing protein 3**Experiment:** 42 - OPD-3 **Fraction:** OPD-3

Match to Query 5495: 1177.634048 from(589.824300,2+)

Title: OECHL100317\_33.11513.11513.2.dta

Data file \\Boromir\masse\Data LTQ-Orbitrap\Chrystelle Lacroix\Etude clinique sJPU\OECHL100317\_33.raw

**Monoisotopic mass of neutral peptide Mr(calc):** 1177.634277**Fixed modifications:** Carbamidomethyl (C) (apply to specified residues or termini only)**Ions****Score:** 65 **Expect:** 2.2e-005**Matches :** 16/102 fragment ions using 30 most intense peaks ([help](#))

| #  | b                  | b <sup>++</sup> | b <sup>0</sup>    | b <sup>0++</sup> | Seq. | y                  | y <sup>++</sup> | y*          | y <sup>*++</sup> | y <sup>0</sup> | y <sup>0++</sup> | #  |
|----|--------------------|-----------------|-------------------|------------------|------|--------------------|-----------------|-------------|------------------|----------------|------------------|----|
| 1  | 102.054955         | 51.531116       | 84.044390         | 42.525833        | T    |                    |                 |             |                  |                |                  | 12 |
| 2  | 159.076419         | 80.041847       | 141.065854        | 71.036565        | G    | <b>1077.593888</b> | 539.300582      | 1060.567339 | 530.787308       | 1059.583323    | 530.295300       | 11 |
| 3  | <b>230.113533</b>  | 115.560404      | 212.102968        | 106.555122       | A    | <b>1020.572424</b> | 510.789850      | 1003.545875 | 502.276576       | 1002.561859    | 501.784568       | 10 |
| 4  | <b>329.181947</b>  | 165.094611      | 311.171382        | 156.089329       | V    | <b>949.535310</b>  | 475.271293      | 932.508761  | 466.758019       | 931.524745     | 466.266011       | 9  |
| 5  | <b>492.245276</b>  | 246.626276      | <b>474.234711</b> | 237.620994       | Y    | <b>850.466896</b>  | 425.737086      | 833.440347  | 417.223812       | 832.456331     | 416.731804       | 8  |
| 6  | 591.313690         | 296.160483      | 573.303125        | 287.155201       | V    | <b>687.403567</b>  | 344.205422      | 670.377018  | 335.692147       | 669.393002     | 335.200139       | 7  |
| 7  | <b>662.350804</b>  | 331.679040      | 644.340239        | 322.673758       | A    | 588.335153         | 294.671215      | 571.308604  | 286.157940       | 570.324588     | 285.665932       | 6  |
| 8  | 791.393397         | 396.200337      | 773.382832        | 387.195054       | E    | <b>517.298039</b>  | 259.152658      | 500.271490  | 250.639383       | 499.287474     | 250.147375       | 5  |
| 9  | <b>904.477461</b>  | 452.742369      | 886.466896        | 443.737086       | I    | <b>388.255446</b>  | 194.631361      | 371.228897  | 186.118087       |                |                  | 4  |
| 10 | 961.498925         | 481.253101      | 943.488360        | 472.247818       | G    | <b>275.171382</b>  | 138.089329      | 258.144833  | 129.576055       |                |                  | 3  |
| 11 | <b>1032.536039</b> | 516.771658      | 1014.525474       | 507.766375       | A    | <b>218.149918</b>  | 109.578597      | 201.123369  | 101.065322       |                |                  | 2  |
| 12 |                    |                 |                   |                  | K    | 147.112804         | 74.060040       | 130.086255  | 65.546765        |                |                  | 1  |

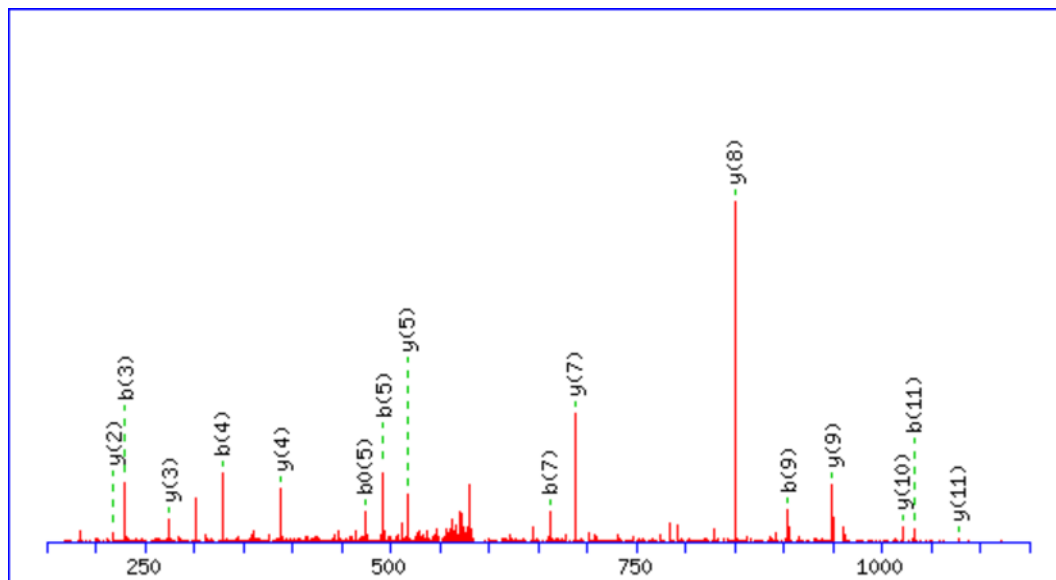

## Peptide View

MS/MS Fragmentation of **KAGPCEQAGSPCR**

Found in **IPI00028381**, Tax\_Id=9606 Gene\_Symbol=DLK2 Isoform 1 of Protein delta homolog 2

**Experiment:** 42 - OPD-3 **Fraction:** OPD-3

Match to Query 8365: 1416.625048 from(709.319800,2+)

Title: OECHL100317\_33.2088.2088.2.dta

Data file \\Boromir\masse\Data LTQ-Orbitrap\Chrystelle Lacroix\Etude clinique sJPU\OECHL100317\_33.raw

**Monoisotopic mass of neutral peptide Mr(calc):** 1416.623810 **Fixed modifications:** Carbamidomethyl (C) (apply to specified residues or termini only) **Ions**

**Score:** 75 **Expect:** 2e-006 **Matches :** 27/128 fragment ions using 50 most intense peaks ([help](#))

| # | b          | b <sup>++</sup> | b*         | b* <sup>++</sup> | b <sup>0</sup> | b <sup>0++</sup> | Seq.     | y                  | y <sup>++</sup>   | y*          | y* <sup>++</sup>  | y <sup>0</sup>     | y <sup>0++</sup> |
|---|------------|-----------------|------------|------------------|----------------|------------------|----------|--------------------|-------------------|-------------|-------------------|--------------------|------------------|
| 1 | 129.102239 | 65.054757       | 112.075690 | 56.541483        |                |                  | <b>K</b> |                    |                   |             |                   |                    |                  |
| 2 | 200.139353 | 100.573315      | 183.112804 | 92.060040        |                |                  | <b>A</b> | <b>1289.536133</b> | <b>645.271705</b> | 1272.509584 | 636.758430        | 1271.525568        | 636.2664         |
| 3 | 257.160817 | 129.084047      | 240.134268 | 120.570772       |                |                  | <b>G</b> | <b>1218.499019</b> | <b>609.753148</b> | 1201.472470 | <b>601.239873</b> | <b>1200.488454</b> | <b>600.7478</b>  |
| 4 | 354.213581 | 177.610429      | 337.187032 | 169.097154       |                |                  | <b>P</b> | <b>1161.477555</b> | <b>581.242416</b> | 1144.451006 | 572.729141        | 1143.466990        | 572.2371         |
| 5 | 514.244230 | 257.625753      | 497.217681 | 249.112479       |                |                  | <b>C</b> | <b>1064.424791</b> | 532.716034        | 1047.398242 | 524.202759        | 1046.414226        | 523.7107         |

|    |             |            |             |            |             |            |   |            |            |            |            |            |          |
|----|-------------|------------|-------------|------------|-------------|------------|---|------------|------------|------------|------------|------------|----------|
| 6  | 643.286823  | 322.147050 | 626.260274  | 313.633775 | 625.276258  | 313.141767 | E | 904.394142 | 452.700709 | 887.367593 | 444.187434 | 886.383577 | 443.6954 |
| 7  | 771.345401  | 386.176339 | 754.318852  | 377.663064 | 753.334836  | 377.171056 | Q | 775.351549 | 388.179413 | 758.325000 | 379.666138 | 757.340984 | 379.1741 |
| 8  | 842.382515  | 421.694896 | 825.355966  | 413.181621 | 824.371950  | 412.689613 | A | 647.292971 | 324.150124 | 630.266422 | 315.636849 | 629.282406 | 315.1448 |
| 9  | 899.403979  | 450.205628 | 882.377430  | 441.692353 | 881.393414  | 441.200345 | G | 576.255857 | 288.631567 | 559.229308 | 280.118292 | 558.245292 | 279.6262 |
| 10 | 986.436007  | 493.721642 | 969.409458  | 485.208367 | 968.425442  | 484.716359 | S | 519.234393 | 260.120835 | 502.207844 | 251.607560 | 501.223828 | 251.1155 |
| 11 | 1083.488771 | 542.248024 | 1066.462222 | 533.734749 | 1065.478206 | 533.242741 | P | 432.202365 | 216.604820 | 415.175816 | 208.091546 |            |          |
| 12 | 1243.519420 | 622.263348 | 1226.492871 | 613.750074 | 1225.508855 | 613.258066 | C | 335.149601 | 168.078438 | 318.123052 | 159.565164 |            |          |
| 13 |             |            |             |            |             |            | R | 175.118952 | 88.063114  | 158.092403 | 79.549839  |            |          |

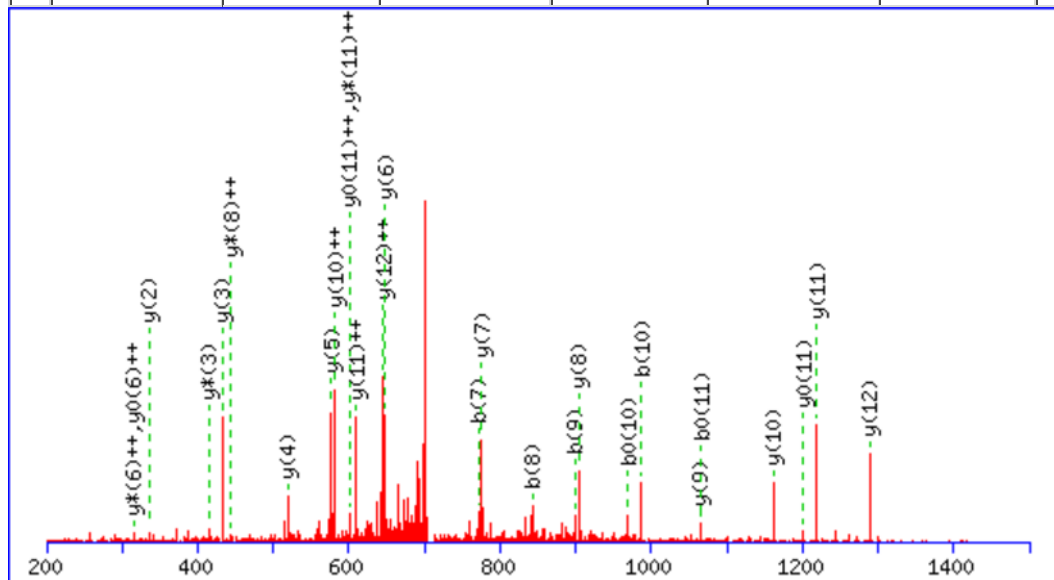

## Peptide View

MS/MS Fragmentation of **AVGLLTVISK**

Found in **IPI00013446**, Tax\_Id=9606 Gene\_Symbol=PSCA Prostate stem cell antigen

Experiment: 42 - OPD-3 Fraction: OPD-3

Match to Query 3054: 999.635048 from(500.824800,2+)

Title: OECHL100317\_33.16797.16797.2.dta

Data file \\Boromir\masse\Data LTQ-Orbitrap\Chrystelle Lacroix\Etude clinique sJPU\OECHL100317\_33.raw

**Monoisotopic mass of neutral peptide Mr(calc):** 999.632828**Fixed modifications:** Carbamidomethyl (C) (apply to specified residues or termini only)**Ions Score:****55** **Expect:** 3.6e-005**Matches :** 16/78 fragment ions using 34 most intense peaks ([help](#))

| #  | b                 | b <sup>++</sup>   | b <sup>0</sup> | b <sup>0++</sup> | Seq. | y                 | y <sup>++</sup> | y*         | y <sup>*++</sup> | y <sup>0</sup>    | y <sup>0++</sup> | #  |
|----|-------------------|-------------------|----------------|------------------|------|-------------------|-----------------|------------|------------------|-------------------|------------------|----|
| 1  | 72.044390         | 36.525833         |                |                  | A    |                   |                 |            |                  |                   |                  | 10 |
| 2  | <b>171.112804</b> | 86.060040         |                |                  | V    | <b>929.602995</b> | 465.305136      | 912.576446 | 456.791861       | 911.592430        | 456.299853       | 9  |
| 3  | <b>228.134268</b> | 114.570772        |                |                  | G    | <b>830.534581</b> | 415.770929      | 813.508032 | 407.257654       | 812.524016        | 406.765646       | 8  |
| 4  | <b>341.218332</b> | <b>171.112804</b> |                |                  | L    | <b>773.513117</b> | 387.260197      | 756.486568 | 378.746922       | 755.502552        | 378.254914       | 7  |
| 5  | <b>454.302396</b> | 227.654836        |                |                  | L    | <b>660.429053</b> | 330.718165      | 643.402504 | 322.204890       | <b>642.418488</b> | 321.712882       | 6  |
| 6  | <b>555.350075</b> | 278.178676        | 537.339510     | 269.173393       | T    | <b>547.344989</b> | 274.176133      | 530.318440 | 265.662858       | 529.334424        | 265.170850       | 5  |
| 7  | <b>654.418489</b> | 327.712883        | 636.407924     | 318.707600       | V    | 446.297310        | 223.652293      | 429.270761 | 215.139018       | 428.286745        | 214.647010       | 4  |
| 8  | <b>767.502553</b> | 384.254915        | 749.491988     | 375.249632       | I    | 347.228896        | 174.118086      | 330.202347 | 165.604811       | 329.218331        | 165.112803       | 3  |
| 9  | <b>854.534581</b> | 427.770929        | 836.524016     | 418.765646       | S    | <b>234.144832</b> | 117.576054      | 217.118283 | 109.062779       | 216.134267        | 108.570771       | 2  |
| 10 |                   |                   |                |                  | K    | 147.112804        | 74.060040       | 130.086255 | 65.546765        |                   |                  | 1  |

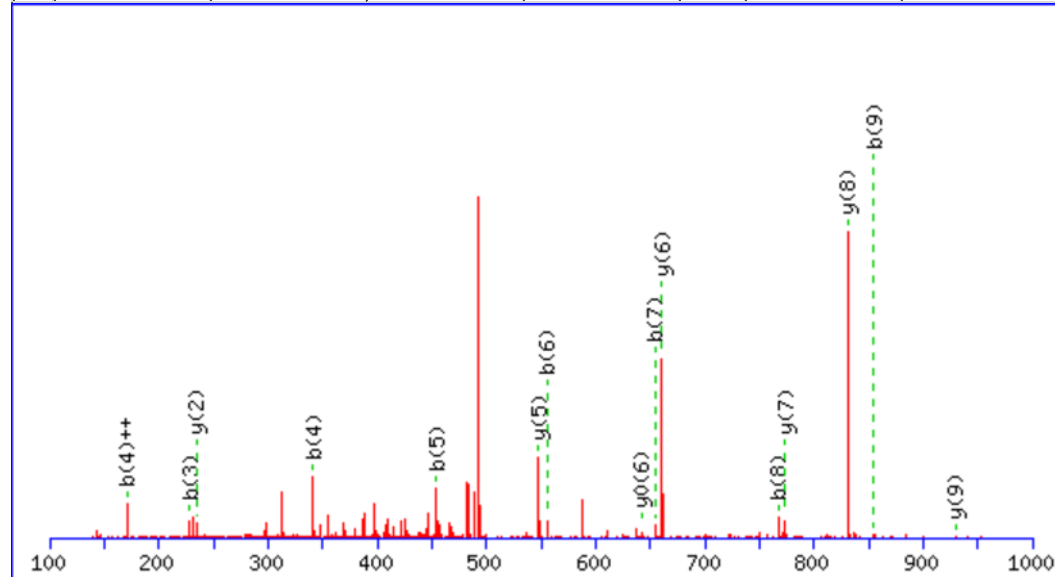

## Peptide View

MS/MS Fragmentation of **AQLDSADIPKAR**Found in **IPI00026303**, Tax\_Id=9606 Gene\_Symbol=PI15 Peptidase inhibitor 15

Experiment: 42 - OPD-3 Fraction: OPD-3

Match to Query 7217: 1283.683248 from(642.848900,2+)

Title: OECHL100317\_33.7945.7945.2.dta

Data file \\Boromir\masse\Data LTQ-Orbitrap\Chrystelle Lacroix\Etude clinique sJPU\OECHL100317\_33.raw

Monoisotopic mass of neutral peptide Mr(calc): 1283.683334 Fixed modifications: Carbamidomethyl (C) (apply to specified residues or termini only) Ions

Score: 59 Expect: 0.0001 Matches : 21/114 fragment ions using 42 most intense peaks ([help](#))

| #  | b                  | b <sup>++</sup> | b*          | b <sup>*++</sup> | b <sup>0</sup> | b <sup>0++</sup> | Seq. | y                  | y <sup>++</sup>   | y*                 | y <sup>*++</sup> | y <sup>0</sup>     | y <sup>0++</sup> |
|----|--------------------|-----------------|-------------|------------------|----------------|------------------|------|--------------------|-------------------|--------------------|------------------|--------------------|------------------|
| 1  | 72.044390          | 36.525833       |             |                  |                |                  | A    |                    |                   |                    |                  |                    |                  |
| 2  | <b>200.102968</b>  | 100.555122      | 183.076419  | 92.041848        |                |                  | Q    | 1213.653527        | 607.330402        | 1196.626978        | 598.817127       | 1195.642962        | 598.3251         |
| 3  | <b>313.187032</b>  | 157.097154      | 296.160483  | 148.583879       |                |                  | L    | <b>1085.594949</b> | <b>543.301113</b> | <b>1068.568400</b> | 534.787838       | <b>1067.584384</b> | 534.2958         |
| 4  | <b>428.213975</b>  | 214.610626      | 411.187426  | 206.097351       | 410.203410     | 205.605343       | D    | <b>972.510885</b>  | <b>486.759081</b> | 955.484336         | 478.245806       | <b>954.500320</b>  | 477.7537         |
| 5  | 515.246003         | 258.126640      | 498.219454  | 249.613365       | 497.235438     | 249.121357       | S    | <b>857.483942</b>  | <b>429.245609</b> | 840.457393         | 420.732335       | 839.473377         | 420.2403         |
| 6  | 586.283117         | 293.645197      | 569.256568  | 285.131922       | 568.272552     | 284.639914       | A    | <b>770.451914</b>  | 385.729595        | 753.425365         | 377.216321       | 752.441349         | 376.7243         |
| 7  | <b>701.310060</b>  | 351.158668      | 684.283511  | 342.645394       | 683.299495     | 342.153386       | D    | <b>699.414800</b>  | 350.211038        | 682.388251         | 341.697764       | 681.404235         | 341.2057         |
| 8  | <b>814.394124</b>  | 407.700700      | 797.367575  | 399.187426       | 796.383559     | 398.695418       | I    | <b>584.387857</b>  | 292.697567        | 567.361308         | 284.184292       |                    |                  |
| 9  | 911.446888         | 456.227082      | 894.420339  | 447.713808       | 893.436323     | 447.221800       | P    | <b>471.303793</b>  | 236.155535        | 454.277244         | 227.642260       |                    |                  |
| 10 | 1039.541851        | 520.274564      | 1022.515302 | 511.761289       | 1021.531286    | 511.269281       | K    | <b>374.251029</b>  | 187.629153        | 357.224480         | 179.115878       |                    |                  |
| 11 | <b>1110.578965</b> | 555.793121      | 1093.552416 | 547.279846       | 1092.568400    | 546.787838       | A    | <b>246.156066</b>  | 123.581671        | 229.129517         | 115.068396       |                    |                  |
| 12 |                    |                 |             |                  |                |                  | R    | 175.118952         | 88.063114         | 158.092403         | 79.549839        |                    |                  |

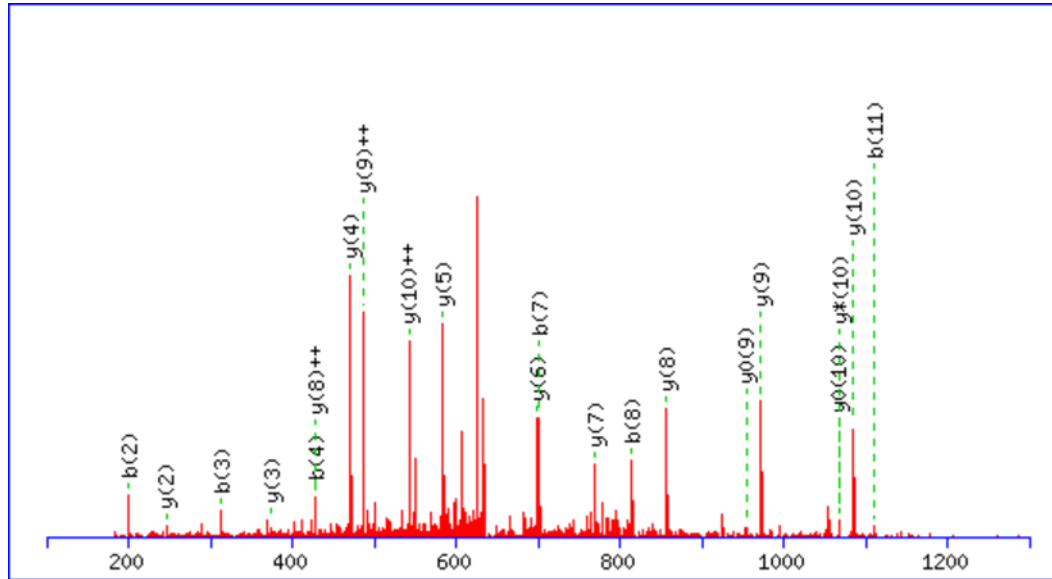

## Peptide View

MS/MS Fragmentation of **QAINAALTQATR**

Found in **IPI00307446**, Tax\_Id=9606 Gene\_Symbol=PCDH24 Protocadherin-24

**Experiment:** 42 - OPD-3 **Fraction:** OPD-3

Match to Query 6940: 1256.683248 from(629.348900,2+)

Title: OECHL100317\_33.10487.10487.2.dta

Data file \\Boromir\masse\Data LTQ-Orbitrap\Chrystelle Lacroix\Etude clinique sJPU\OECHL100317\_33.raw

**Monoisotopic mass of neutral peptide Mr(calc):** 1256.683670 **Fixed modifications:** Carbamidomethyl (C) (apply to specified residues or termini only) **Ions**

**Score:** 76 **Expect:** 2e-006 **Matches :** 10/116 fragment ions using 11 most intense peaks ([help](#))

| # | b          | b <sup>++</sup> | b <sup>*</sup> | b <sup>*++</sup> | b <sup>0</sup> | b <sup>0++</sup> | Seq. | y                  | y <sup>++</sup> | y <sup>*</sup> | y <sup>*++</sup> | y <sup>0</sup> | y <sup>0++</sup> |
|---|------------|-----------------|----------------|------------------|----------------|------------------|------|--------------------|-----------------|----------------|------------------|----------------|------------------|
| 1 | 129.065854 | 65.036565       | 112.039305     | 56.523291        |                |                  | Q    |                    |                 |                |                  |                |                  |
| 2 | 200.102968 | 100.555122      | 183.076419     | 92.041848        |                |                  | A    | 1129.632399        | 565.319837      | 1112.605850    | 556.806563       | 1111.621834    | 556.3145         |
| 3 | 313.187032 | 157.097154      | 296.160483     | 148.583879       |                |                  | I    | <b>1058.595285</b> | 529.801280      | 1041.568736    | 521.288006       | 1040.584720    | 520.7959         |
| 4 | 427.229959 | 214.118618      | 410.203410     | 205.605343       |                |                  | N    | <b>945.511221</b>  | 473.259249      | 928.484672     | 464.745974       | 927.500656     | 464.2539         |
| 5 | 498.267073 | 249.637175      | 481.240524     | 241.123900       |                |                  | A    | <b>831.468294</b>  | 416.237785      | 814.441745     | 407.724511       | 813.457729     | 407.2325         |



|    |             |            |             |            |             |            |   |            |            |            |            |            |          |
|----|-------------|------------|-------------|------------|-------------|------------|---|------------|------------|------------|------------|------------|----------|
| 6  | 569.304187  | 285.155732 | 552.277638  | 276.642457 |             |            | A | 760.431180 | 380.719228 | 743.404631 | 372.205953 | 742.420615 | 371.7139 |
| 7  | 682.388251  | 341.697764 | 665.361702  | 333.184489 |             |            | L | 689.394066 | 345.200671 | 672.367517 | 336.687396 | 671.383501 | 336.1953 |
| 8  | 783.435930  | 392.221603 | 766.409381  | 383.708329 | 765.425365  | 383.216321 | T | 576.310002 | 288.658639 | 559.283453 | 280.145364 | 558.299437 | 279.6533 |
| 9  | 911.494508  | 456.250892 | 894.467959  | 447.737618 | 893.483943  | 447.245610 | Q | 475.262323 | 238.134799 | 458.235774 | 229.621525 | 457.251758 | 229.1295 |
| 10 | 982.531622  | 491.769449 | 965.505073  | 483.256175 | 964.521057  | 482.764167 | A | 347.203745 | 174.105510 | 330.177196 | 165.592236 | 329.193180 | 165.1002 |
| 11 | 1083.579301 | 542.293289 | 1066.552752 | 533.780014 | 1065.568736 | 533.288006 | T | 276.166631 | 138.586953 | 259.140082 | 130.073679 | 258.156066 | 129.5816 |
| 12 |             |            |             |            |             |            | R | 175.118952 | 88.063114  | 158.092403 | 79.549839  |            |          |

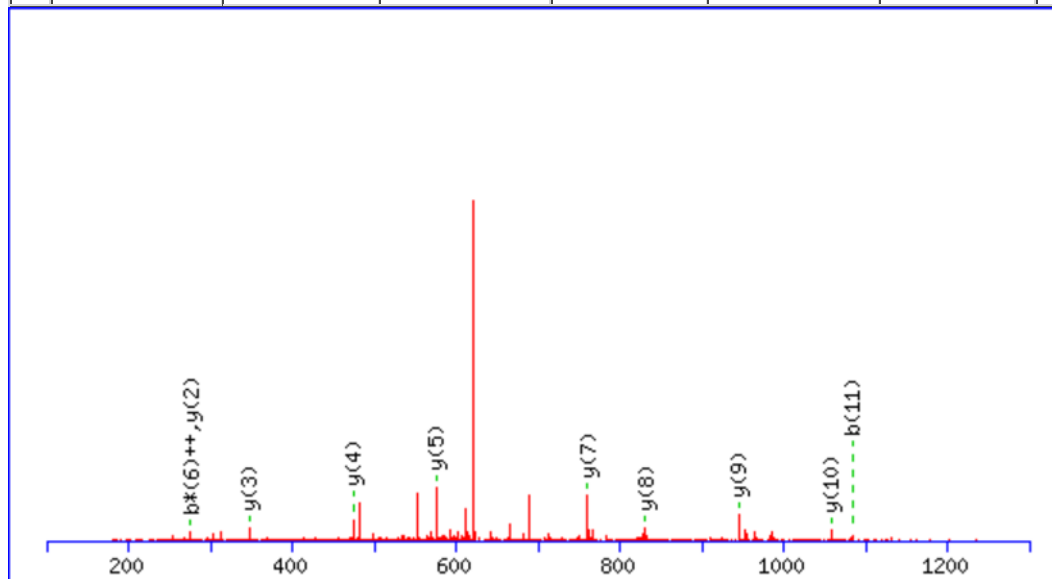

## Peptide View

MS/MS Fragmentation of **NIETINTFHQYSVK**

Found in **IPI00027462**, Tax\_Id=9606 Gene\_Symbol=S100A9 Protein S100-A9

Experiment: 42 - OPD-3 Fraction: OPD-3

Match to Query 11785: 1805.932648 from(903.973600,2+)

Title: OECHL100317\_33.18425.18425.2.dta

Data file \\Boromir\masse\Data LTQ-Orbitrap\Chrystelle Lacroix\Etude clinique sJPU\OECHL100317\_33.raw

**Monoisotopic mass of neutral peptide Mr(calc): 1805.931183** Fixed modifications: Carbamidomethyl (C) (apply to specified residues or termini only) Ions

Score: 74 Expect: 4.8e-006 Matches : 26/160 fragment ions using 30 most intense peaks (help)

| #  | b                  | b <sup>++</sup> | b*          | b <sup>*++</sup> | b <sup>0</sup>    | b <sup>0++</sup>  | Seq. | y                  | y <sup>++</sup>   | y*          | y <sup>*++</sup>  | y <sup>0</sup> | y <sup>0++</sup> |
|----|--------------------|-----------------|-------------|------------------|-------------------|-------------------|------|--------------------|-------------------|-------------|-------------------|----------------|------------------|
| 1  | 115.050203         | 58.028740       | 98.023654   | 49.515465        |                   |                   | N    |                    |                   |             |                   |                |                  |
| 2  | 228.134267         | 114.570771      | 211.107718  | 106.057497       |                   |                   | I    | 1692.895549        | 846.951413        | 1675.869000 | 838.438138        | 1674.884984    | 837.9461         |
| 3  | <b>357.176860</b>  | 179.092068      | 340.150311  | 170.578793       | 339.166295        | 170.086785        | E    | <b>1579.811485</b> | <b>790.409381</b> | 1562.784936 | 781.896106        | 1561.800920    | 781.4040         |
| 4  | <b>458.224539</b>  | 229.615907      | 441.197990  | 221.102633       | <b>440.213974</b> | 220.610625        | T    | <b>1450.768892</b> | 725.888084        | 1433.742343 | 717.374810        | 1432.758327    | 716.8828         |
| 5  | <b>571.308603</b>  | 286.157940      | 554.282054  | 277.644665       | <b>553.298038</b> | 277.152657        | I    | <b>1349.721213</b> | 675.364245        | 1332.694664 | <b>666.850970</b> | 1331.710648    | <b>666.3589</b>  |
| 6  | 684.392667         | 342.699972      | 667.366118  | 334.186697       | <b>666.382102</b> | <b>333.694689</b> | I    | <b>1236.637149</b> | 618.822213        | 1219.610600 | 610.308938        | 1218.626584    | 609.8169         |
| 7  | 798.435594         | 399.721435      | 781.409045  | 391.208161       | 780.425029        | 390.716153        | N    | <b>1123.553085</b> | 562.280181        | 1106.526536 | <b>553.766906</b> | 1105.542520    | <b>553.2748</b>  |
| 8  | 899.483273         | 450.245275      | 882.456724  | 441.732000       | 881.472708        | 441.239992        | T    | <b>1009.510158</b> | 505.258717        | 992.483609  | 496.745443        | 991.499593     | <b>496.2534</b>  |
| 9  | 1046.551687        | 523.779482      | 1029.525138 | 515.266207       | 1028.541122       | 514.774199        | F    | 908.462479         | 454.734878        | 891.435930  | 446.221603        | 890.451914     | 445.7295         |
| 10 | 1183.610599        | 592.308938      | 1166.584050 | 583.795663       | 1165.600034       | 583.303655        | H    | <b>761.394065</b>  | 381.200671        | 744.367516  | 372.687396        | 743.383500     | 372.1953         |
| 11 | <b>1311.669177</b> | 656.338227      | 1294.642628 | 647.824952       | 1293.658612       | 647.332944        | Q    | <b>624.335153</b>  | 312.671215        | 607.308604  | 304.157940        | 606.324588     | 303.6659         |
| 12 | <b>1474.732506</b> | 737.869891      | 1457.705957 | 729.356617       | 1456.721941       | 728.864609        | Y    | <b>496.276575</b>  | 248.641926        | 479.250026  | 240.128651        | 478.266010     | 239.6366         |
| 13 | 1561.764534        | 781.385905      | 1544.737985 | 772.872631       | 1543.753969       | 772.380623        | S    | <b>333.213246</b>  | 167.110261        | 316.186697  | 158.596987        | 315.202681     | 158.1049         |
| 14 | <b>1660.832948</b> | 830.920112      | 1643.806399 | 822.406838       | 1642.822383       | 821.914830        | V    | 246.181218         | 123.594247        | 229.154669  | 115.080973        |                |                  |
| 15 |                    |                 |             |                  |                   |                   | K    | 147.112804         | 74.060040         | 130.086255  | 65.546765         |                |                  |

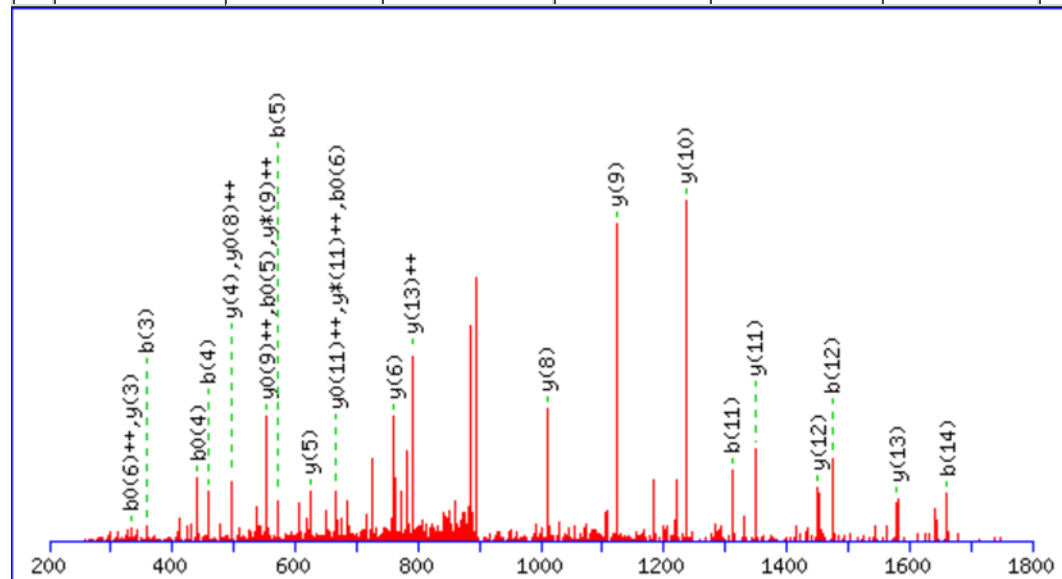

## Peptide View

MS/MS Fragmentation of **DAEEDDSLANSDDLKELLETDGDNRRER**

Found in **IPI00000828**, Tax\_Id=9606 Gene\_Symbol=PENK Proenkephalin-A

Experiment: 42 - OPD-3 Fraction: OPD-3

Match to Query 15570: 3033.407172 from(1012.143000,3+)

Title: OECHL100317\_33.18872.18872.3.dta

Data file \\Boromir\masse\Data LTQ-Orbitrap\Chrystelle Lacroix\Etude clinique sJPU\OECHL100317\_33.raw

**Monoisotopic mass of neutral peptide Mr(calc): 3033.401001** Fixed modifications: Carbamidomethyl (C) (apply to specified residues or termini only) Ions

Score: 73 Expect: 9.3e-006 Matches : 43/292 fragment ions using 68 most intense peaks ([help](#))

| #  | b                  | b <sup>++</sup>   | b*                 | b <sup>*++</sup>  | b <sup>0</sup>    | b <sup>0++</sup>  | Seq. | y           | y <sup>++</sup>    | y*          | y <sup>*++</sup>   | y <sup>0</sup> |     |
|----|--------------------|-------------------|--------------------|-------------------|-------------------|-------------------|------|-------------|--------------------|-------------|--------------------|----------------|-----|
| 1  | 116.034219         | 58.520748         |                    |                   | 98.023654         | 49.515465         | D    |             |                    |             |                    |                |     |
| 2  | 187.071333         | 94.039304         |                    |                   | 169.060768        | 85.034022         | A    | 2919.381392 | 1460.194334        | 2902.354843 | 1451.681059        | 2901.370827    | 14: |
| 3  | 316.113926         | 158.560601        |                    |                   | 298.103361        | 149.555319        | E    | 2848.344278 | 1424.675777        | 2831.317729 | 1416.162502        | 2830.333713    | 14: |
| 4  | <b>445.156519</b>  | 223.081898        |                    |                   | 427.145954        | 214.076615        | E    | 2719.301685 | <b>1360.154480</b> | 2702.275136 | 1351.641206        | 2701.291120    | 13: |
| 5  | <b>560.183462</b>  | 280.595369        |                    |                   | 542.172897        | 271.590087        | D    | 2590.259092 | <b>1295.633184</b> | 2573.232543 | <b>1287.119909</b> | 2572.248527    | 12: |
| 6  | <b>675.210405</b>  | 338.108841        |                    |                   | <b>657.199840</b> | 329.103558        | D    | 2475.232149 | <b>1238.119712</b> | 2458.205600 | 1229.606438        | 2457.221584    | 12: |
| 7  | <b>762.242433</b>  | 381.624855        |                    |                   | <b>744.231868</b> | 372.619572        | S    | 2360.205206 | <b>1180.606241</b> | 2343.178657 | 1172.092966        | 2342.194641    | 11: |
| 8  | <b>875.326497</b>  | 438.166887        |                    |                   | 857.315932        | <b>429.161604</b> | L    | 2273.173178 | <b>1137.090227</b> | 2256.146629 | 1128.576952        | 2255.162613    | 11: |
| 9  | 946.363611         | 473.685444        |                    |                   | 928.353046        | 464.680161        | A    | 2160.089114 | <b>1080.548195</b> | 2143.062565 | 1072.034920        | 2142.078549    | 10: |
| 10 | 1060.406538        | 530.706907        | 1043.379989        | 522.193633        | 1042.395973       | 521.701624        | N    | 2089.052000 | <b>1045.029638</b> | 2072.025451 | 1036.516363        | 2071.041435    | 10: |
| 11 | 1147.438566        | <b>574.222921</b> | 1130.412017        | 565.709647        | 1129.428001       | 565.217639        | S    | 1975.009073 | <b>988.008174</b>  | 1957.982524 | 979.494900         | 1956.998508    | 9:  |
| 12 | 1234.470594        | 617.738935        | 1217.444045        | 609.225661        | 1216.460029       | 608.733653        | S    | 1887.977045 | <b>944.492160</b>  | 1870.950496 | 935.978886         | 1869.966480    | 9:  |
| 13 | 1349.497537        | <b>675.252407</b> | 1332.470988        | <b>666.739132</b> | 1331.486972       | <b>666.247124</b> | D    | 1800.945017 | 900.976146         | 1783.918468 | 892.462872         | 1782.934452    | 8:  |
| 14 | 1462.581601        | 731.794439        | 1445.555052        | 723.281164        | 1444.571036       | 722.789156        | L    | 1685.918074 | <b>843.462675</b>  | 1668.891525 | 834.949400         | 1667.907509    | 8:  |
| 15 | 1575.665665        | <b>788.336471</b> | <b>1558.639116</b> | 779.823196        | 1557.655100       | 779.331188        | L    | 1572.834010 | 786.920643         | 1555.807461 | 778.407368         | 1554.823445    | 7:  |
| 16 | <b>1703.760628</b> | 852.383952        | 1686.734079        | <b>843.870678</b> | 1685.750063       | <b>843.378670</b> | K    | 1459.749946 | <b>730.378611</b>  | 1442.723397 | 721.865336         | 1441.739381    | 7:  |
| 17 | 1832.803221        | 916.905248        | <b>1815.776672</b> | <b>908.391974</b> | 1814.792656       | <b>907.899966</b> | E    | 1331.654983 | <b>666.331129</b>  | 1314.628434 | <b>657.817855</b>  | 1313.644418    | 6:  |
| 18 | <b>1945.887285</b> | 973.447280        | 1928.860736        | 964.934006        | 1927.876720       | 964.441998        | L    | 1202.612390 | 601.809833         | 1185.585841 | 593.296558         | 1184.601825    | 5:  |

|    |             |             |             |             |             |             |   |             |            |             |            |             |    |
|----|-------------|-------------|-------------|-------------|-------------|-------------|---|-------------|------------|-------------|------------|-------------|----|
| 19 | 2058.971349 | 1029.989312 | 2041.944800 | 1021.476038 | 2040.960784 | 1020.984030 | L | 1089.528326 | 545.267801 | 1072.501777 | 536.754526 | 1071.517761 | 5. |
| 20 | 2188.013942 | 1094.510609 | 2170.987393 | 1085.997334 | 2170.003377 | 1085.505326 | E | 976.444262  | 488.725769 | 959.417713  | 480.212494 | 958.433697  | 4. |
| 21 | 2289.061621 | 1145.034448 | 2272.035072 | 1136.521174 | 2271.051056 | 1136.029166 | T | 847.401669  | 424.204472 | 830.375120  | 415.691198 | 829.391104  | 4. |
| 22 | 2346.083085 | 1173.545180 | 2329.056536 | 1165.031906 | 2328.072520 | 1164.539898 | G | 746.353990  | 373.680633 | 729.327441  | 365.167358 | 728.343425  | 3. |
| 23 | 2461.110028 | 1231.058652 | 2444.083479 | 1222.545377 | 2443.099463 | 1222.053369 | D | 689.332526  | 345.169901 | 672.305977  | 336.656626 | 671.321961  | 3. |
| 24 | 2575.152955 | 1288.080115 | 2558.126406 | 1279.566841 | 2557.142390 | 1279.074833 | N | 574.305583  | 287.656430 | 557.279034  | 279.143155 | 556.295018  | 2. |
| 25 | 2731.254066 | 1366.130671 | 2714.227517 | 1357.617396 | 2713.243501 | 1357.125388 | R | 460.262656  | 230.634966 | 443.236107  | 222.121692 | 442.252091  | 2. |
| 26 | 2860.296659 | 1430.651967 | 2843.270110 | 1422.138693 | 2842.286094 | 1421.646685 | E | 304.161545  | 152.584411 | 287.134996  | 144.071136 | 286.150980  | 1. |
| 27 |             |             |             |             |             |             | R | 175.118952  | 88.063114  | 158.092403  | 79.549839  |             |    |

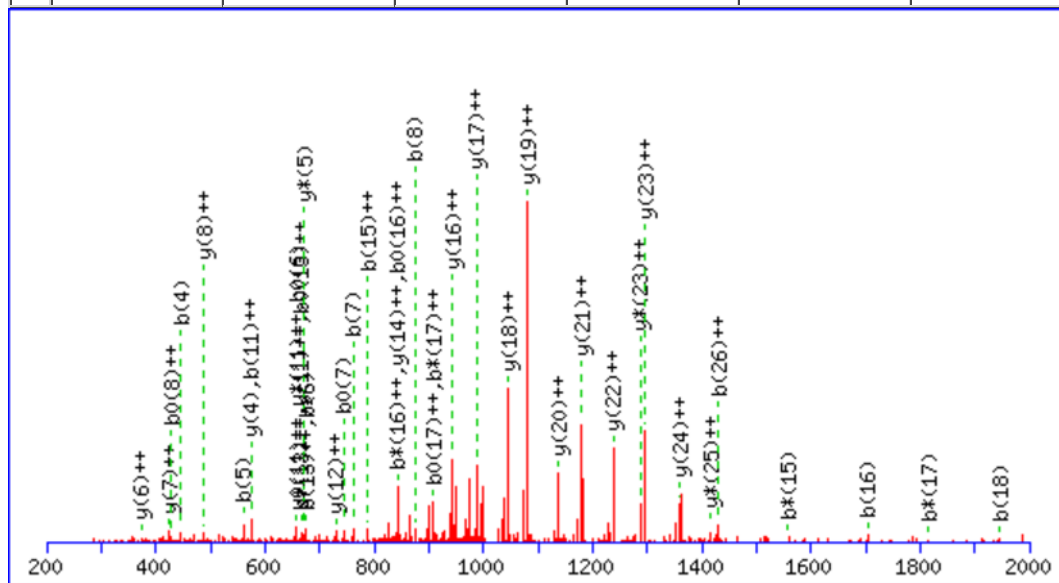

## Peptide View

MS/MS Fragmentation of **IESVLSSGKR**

Found in **IPI00018236**, Tax\_Id=9606 Gene\_Symbol=GM2A Ganglioside GM2 activator

**Experiment:** 42 - OPD-3 **Fraction:** OPD-3

Match to Query 5239: 1161.635248 from(581.824900,2+)

Title: OECHL100317\_33.5675.5675.2.dta

Data file \\Boromir\masse\Data LTQ-Orbitrap\Chrystelle Lacroix\Etude clinique sJPU\OECHL100317\_33.raw

**Monoisotopic mass of neutral peptide Mr(calc):** 1161.635330**Fixed modifications:** Carbamidomethyl (C) (apply to specified residues or termini only)**Ions****Score:** 50 **Expect:** 0.00067**Matches :** 22/94 fragment ions using 30 most intense peaks ([help](#))

| #  | b                 | b <sup>++</sup>   | b*         | b* <sup>++</sup> | b <sup>0</sup>    | b <sup>0++</sup> | Seq. | y                  | y <sup>++</sup>   | y*          | y* <sup>++</sup>  | y <sup>0</sup>    | y <sup>0++</sup>  |
|----|-------------------|-------------------|------------|------------------|-------------------|------------------|------|--------------------|-------------------|-------------|-------------------|-------------------|-------------------|
| 1  | 114.091340        | 57.549308         |            |                  |                   |                  | I    |                    |                   |             |                   |                   |                   |
| 2  | <b>243.133933</b> | 122.070605        |            |                  | 225.123368        | 113.065322       | E    | <b>1049.558562</b> | <b>525.282919</b> | 1032.532013 | 516.769645        | 1031.547997       | 516.277637        |
| 3  | <b>330.165961</b> | 165.586618        |            |                  | <b>312.155396</b> | 156.581336       | S    | <b>920.515969</b>  | <b>460.761623</b> | 903.489420  | <b>452.248348</b> | <b>902.505404</b> | <b>451.756340</b> |
| 4  | <b>429.234375</b> | <b>215.120826</b> |            |                  | <b>411.223810</b> | 206.115543       | V    | <b>833.483941</b>  | 417.245609        | 816.457392  | 408.732334        | 815.473376        | 408.240326        |
| 5  | 542.318439        | 271.662858        |            |                  | 524.307874        | 262.657575       | L    | <b>734.415527</b>  | 367.711402        | 717.388978  | 359.198127        | 716.404962        | 358.706119        |
| 6  | 629.350467        | 315.178872        |            |                  | 611.339902        | 306.173589       | S    | <b>621.331463</b>  | 311.169370        | 604.304914  | 302.656095        | 603.320898        | 302.164087        |
| 7  | 716.382495        | 358.694886        |            |                  | 698.371930        | 349.689603       | S    | <b>534.299435</b>  | 267.653356        | 517.272886  | 259.140081        | 516.288870        | 258.648073        |
| 8  | 803.414523        | 402.210899        |            |                  | 785.403958        | 393.205617       | S    | 447.267407         | 224.137342        | 430.240858  | <b>215.624067</b> | <b>429.256842</b> | <b>215.132059</b> |
| 9  | 860.435987        | 430.721632        |            |                  | 842.425422        | 421.716349       | G    | 360.235379         | 180.621328        | 343.208830  | 172.108053        |                   |                   |
| 10 | <b>988.530950</b> | 494.769113        | 971.504401 | 486.255838       | 970.520385        | 485.763830       | K    | 303.213915         | 152.110596        | 286.187366  | 143.597321        |                   |                   |
| 11 |                   |                   |            |                  |                   |                  | R    | <b>175.118952</b>  | 88.063114         | 158.092403  | 79.549840         |                   |                   |

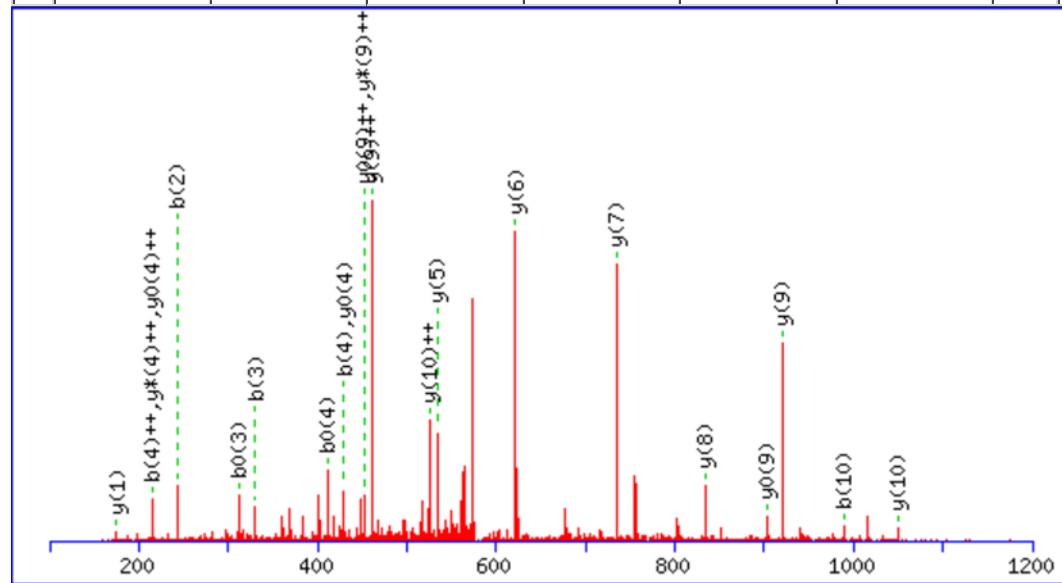

## Peptide View

MS/MS Fragmentation of **NPVLQQDAHSSVTITPQR**

Found in **IPI00410488**, Tax\_Id=9606 Gene\_Symbol=CD276 Isoform 1 of CD276 antigen

Experiment: 45 - OPE-3 Fraction: OPE-3

Match to Query 14441: 1990.024248 from(996.019400,2+)

Title: OECHL100317\_31.9739.9739.2.dta

Data file \\Boromir\masse\Data LTQ-Orbitrap\Chrystelle Lacroix\Etude clinique sJPU\OECHL100317\_31.raw

**Monoisotopic mass of neutral peptide Mr(calc):** 1990.023209**Fixed modifications:** Carbamidomethyl (C) (apply to specified residues or termini only)**Ions**

**Score:** 92 **Expect:** 8e-008**Matches :** 35/186 fragment ions using 64 most intense peaks ([help](#))

| #  | b           | b <sup>++</sup> | b*          | b <sup>*++</sup> | b <sup>0</sup> | b <sup>0++</sup> | Seq. | y           | y <sup>++</sup> | y*          | y <sup>*++</sup> | y <sup>0</sup> | y <sup>0++</sup> |
|----|-------------|-----------------|-------------|------------------|----------------|------------------|------|-------------|-----------------|-------------|------------------|----------------|------------------|
| 1  | 115.050203  | 58.028740       | 98.023654   | 49.515465        |                |                  | N    |             |                 |             |                  |                |                  |
| 2  | 212.102967  | 106.555121      | 195.076418  | 98.041847        |                |                  | P    | 1876.987553 | 938.997415      | 1859.961004 | 930.484140       | 1858.976988    | 929.9921         |
| 3  | 311.171381  | 156.089328      | 294.144832  | 147.576054       |                |                  | V    | 1779.934789 | 890.471033      | 1762.908240 | 881.957758       | 1761.924224    | 881.4657         |
| 4  | 424.255445  | 212.631361      | 407.228896  | 204.118086       |                |                  | L    | 1680.866375 | 840.936826      | 1663.839826 | 832.423551       | 1662.855810    | 831.9315         |
| 5  | 552.314023  | 276.660650      | 535.287474  | 268.147375       |                |                  | Q    | 1567.782311 | 784.394794      | 1550.755762 | 775.881519       | 1549.771746    | 775.3895         |
| 6  | 680.372601  | 340.689939      | 663.346052  | 332.176664       |                |                  | Q    | 1439.723733 | 720.365505      | 1422.697184 | 711.852230       | 1421.713168    | 711.3602         |
| 7  | 795.399544  | 398.203410      | 778.372995  | 389.690136       | 777.388979     | 389.198128       | D    | 1311.665155 | 656.336215      | 1294.638606 | 647.822941       | 1293.654590    | 647.3309         |
| 8  | 866.436658  | 433.721967      | 849.410109  | 425.208693       | 848.426093     | 424.716685       | A    | 1196.638212 | 598.822744      | 1179.611663 | 590.309470       | 1178.627647    | 589.8174         |
| 9  | 1003.495570 | 502.251423      | 986.469021  | 493.738149       | 985.485005     | 493.246141       | H    | 1125.601098 | 563.304187      | 1108.574549 | 554.790913       | 1107.590533    | 554.2989         |
| 10 | 1090.527598 | 545.767437      | 1073.501049 | 537.254163       | 1072.517033    | 536.762155       | S    | 988.542186  | 494.774731      | 971.515637  | 486.261457       | 970.531621     | 485.7694         |
| 11 | 1177.559626 | 589.283451      | 1160.533077 | 580.770177       | 1159.549061    | 580.278169       | S    | 901.510158  | 451.258717      | 884.483609  | 442.745443       | 883.499593     | 442.2534         |
| 12 | 1276.628040 | 638.817658      | 1259.601491 | 630.304384       | 1258.617475    | 629.812376       | V    | 814.478130  | 407.742703      | 797.451581  | 399.229428       | 796.467565     | 398.7374         |
| 13 | 1377.675719 | 689.341498      | 1360.649170 | 680.828223       | 1359.665154    | 680.336215       | T    | 715.409716  | 358.208496      | 698.383167  | 349.695221       | 697.399151     | 349.2032         |
| 14 | 1490.759783 | 745.883530      | 1473.733234 | 737.370255       | 1472.749218    | 736.878247       | I    | 614.362037  | 307.684656      | 597.335488  | 299.171382       | 596.351472     | 298.6793         |
| 15 | 1591.807462 | 796.407369      | 1574.780913 | 787.894095       | 1573.796897    | 787.402087       | T    | 501.277973  | 251.142624      | 484.251424  | 242.629350       | 483.267408     | 242.1373         |
| 16 | 1688.860226 | 844.933751      | 1671.833677 | 836.420477       | 1670.849661    | 835.928469       | P    | 400.230294  | 200.618785      | 383.203745  | 192.105510       |                |                  |
| 17 | 1816.918804 | 908.963040      | 1799.892255 | 900.449766       | 1798.908239    | 899.957758       | Q    | 303.177530  | 152.092403      | 286.150981  | 143.579128       |                |                  |
| 18 |             |                 |             |                  |                |                  | R    | 175.118952  | 88.063114       | 158.092403  | 79.549839        |                |                  |

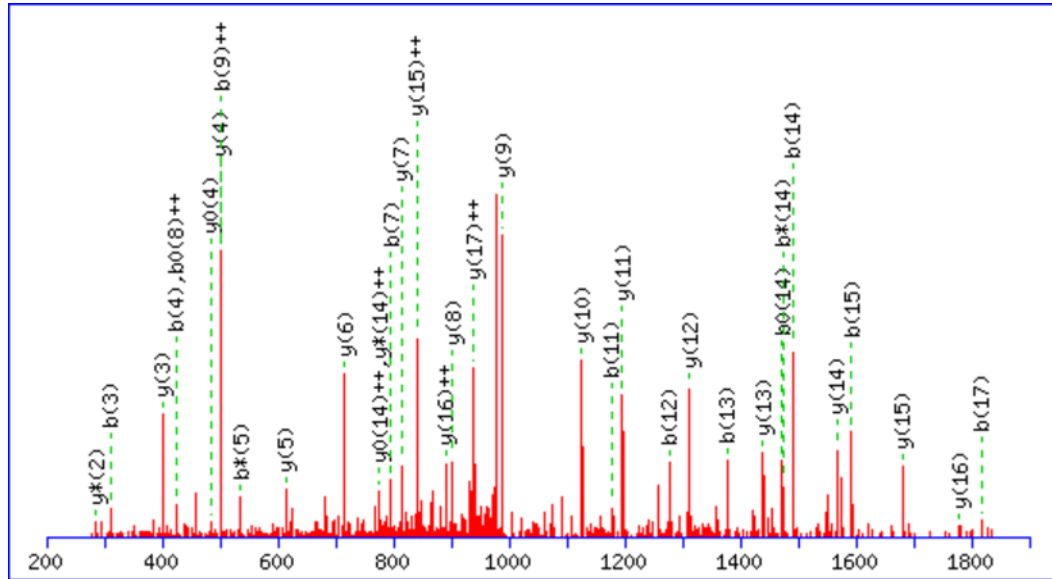

## Peptide View

### MS/MS Fragmentation of **LVQELCSLK**

Found in **IPI00018275**, Tax\_Id=9606 Gene\_Symbol=PRND Prion-like protein doppel

**Experiment:** 45 - OPE-3 **Fraction:** OPE-3

Match to Query 4974: 1088.588248 from(545.301400,2+)

Title: OECHL100317\_31.11553.11553.2.dta

Data file \\Boromir\masse\Data LTQ-Orbitrap\Chrystelle Lacroix\Etude clinique sJPU\OECHL100317\_31.raw

**Monoisotopic mass of neutral peptide Mr(calc):** 1088.589966 **Fixed modifications:** Carbamidomethyl (C) (apply to specified residues or termini only) **Ions**

**Score:** 58 **Expect:** 0.00011 **Matches :** 9/82 fragment ions using 9 most intense peaks ([help](#))

| # | b                 | b <sup>++</sup> | b*         | b <sup>*++</sup> | b <sup>0</sup> | b <sup>0++</sup> | Seq. | y                 | y <sup>++</sup>   | y*         | y <sup>*++</sup> | y <sup>0</sup> | y <sup>0++</sup> | # |
|---|-------------------|-----------------|------------|------------------|----------------|------------------|------|-------------------|-------------------|------------|------------------|----------------|------------------|---|
| 1 | 114.091340        | 57.549308       |            |                  |                |                  | L    |                   |                   |            |                  |                |                  | 9 |
| 2 | <b>213.159754</b> | 107.083515      |            |                  |                |                  | V    | <b>976.513194</b> | 488.760235        | 959.486645 | 480.246961       | 958.502629     | 479.754953       | 8 |
| 3 | 341.218332        | 171.112804      | 324.191783 | 162.599529       |                |                  | Q    | <b>877.444780</b> | <b>439.226028</b> | 860.418231 | 430.712754       | 859.434215     | 430.220746       | 7 |
| 4 | 470.260925        | 235.634100      | 453.234376 | 227.120826       | 452.250360     | 226.628818       | E    | <b>749.386202</b> | 375.196739        | 732.359653 | 366.683465       | 731.375637     | 366.191457       | 6 |
| 5 | 583.344989        | 292.176133      | 566.318440 | 283.662858       | 565.334424     | 283.170850       | L    | <b>620.343609</b> | 310.675443        | 603.317060 | 302.162168       | 602.333044     | 301.670160       | 5 |

|   |            |            |            |            |            |            |   |            |            |            |            |            |            |   |
|---|------------|------------|------------|------------|------------|------------|---|------------|------------|------------|------------|------------|------------|---|
| 6 | 743.375638 | 372.191457 | 726.349089 | 363.678183 | 725.365073 | 363.186175 | C | 507.259545 | 254.133410 | 490.232996 | 245.620136 | 489.248980 | 245.128128 | 4 |
| 7 | 830.407666 | 415.707471 | 813.381117 | 407.194197 | 812.397101 | 406.702189 | S | 347.228896 | 174.118086 | 330.202347 | 165.604811 | 329.218331 | 165.112803 | 3 |
| 8 | 943.491730 | 472.249503 | 926.465181 | 463.736229 | 925.481165 | 463.244221 | L | 260.196868 | 130.602072 | 243.170319 | 122.088797 |            |            | 2 |
| 9 |            |            |            |            |            |            | K | 147.112804 | 74.060040  | 130.086255 | 65.546765  |            |            | 1 |

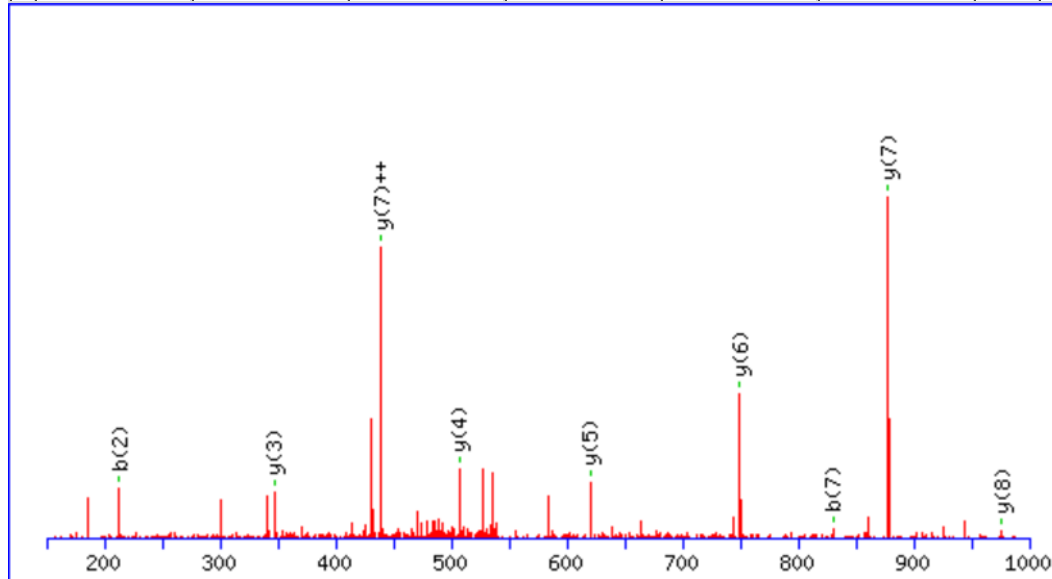

## Peptide View

MS/MS Fragmentation of **NTGIICTIGPASR**

Found in **IPI00220644**, Tax\_Id=9606 Gene\_Symbol=PKM2 Isoform M1 of Pyruvate kinase isozymes M1/M2

Experiment: 45 - OPE-3 Fraction: OPE-3

Match to Query 9060: 1358.696048 from(680.355300,2+)

Title: OECHL100317\_31.11775.11775.2.dta

Data file \\Boromir\masse\Data LTQ-Orbitrap\Chrystelle Lacroix\Etude clinique sJPU\OECHL100317\_31.raw

**Monoisotopic mass of neutral peptide Mr(calc):** 1358.697632**Fixed modifications:** Carbamidomethyl (C) (apply to specified residues or termini only)**Ions**

**Score:** 80 **Expect:** 1.5e-006**Matches :** 30/140 fragment ions using 44 most intense peaks ([help](#))

| # | b          | b <sup>++</sup> | b <sup>*</sup> | b <sup>*++</sup> | b <sup>0</sup> | b <sup>0++</sup> | Seq. | y | y <sup>++</sup> | y <sup>*</sup> | y <sup>*++</sup> | y <sup>0</sup> | y <sup>0++</sup> |
|---|------------|-----------------|----------------|------------------|----------------|------------------|------|---|-----------------|----------------|------------------|----------------|------------------|
| 1 | 115.050203 | 58.028740       | 98.023654      | 49.515465        |                |                  | N    |   |                 |                |                  |                |                  |



|    |                    |            |                   |            |                   |            |   |                    |                   |             |            |             |          |
|----|--------------------|------------|-------------------|------------|-------------------|------------|---|--------------------|-------------------|-------------|------------|-------------|----------|
| 2  | <b>216.097882</b>  | 108.552579 | 199.071333        | 100.039305 | 198.087317        | 99.547296  | T | <b>1245.661985</b> | 623.334631        | 1228.635436 | 614.821356 | 1227.651420 | 614.3293 |
| 3  | <b>273.119346</b>  | 137.063311 | 256.092797        | 128.550037 | <b>255.108781</b> | 128.058029 | G | <b>1144.614306</b> | <b>572.810791</b> | 1127.587757 | 564.297517 | 1126.603741 | 563.8055 |
| 4  | <b>386.203410</b>  | 193.605343 | 369.176861        | 185.092069 | <b>368.192845</b> | 184.600061 | I | <b>1087.592842</b> | 544.300059        | 1070.566293 | 535.786785 | 1069.582277 | 535.2947 |
| 5  | <b>499.287474</b>  | 250.147375 | 482.260925        | 241.634101 | 481.276909        | 241.142093 | I | <b>974.508778</b>  | <b>487.758027</b> | 957.482229  | 479.244753 | 956.498213  | 478.7527 |
| 6  | 659.318123         | 330.162700 | 642.291574        | 321.649425 | 641.307558        | 321.157417 | C | <b>861.424714</b>  | <b>431.215995</b> | 844.398165  | 422.702721 | 843.414149  | 422.2107 |
| 7  | <b>760.365802</b>  | 380.686539 | <b>743.339253</b> | 372.173265 | <b>742.355237</b> | 371.681257 | T | <b>701.394065</b>  | 351.200671        | 684.367516  | 342.687396 | 683.383500  | 342.1953 |
| 8  | <b>873.449866</b>  | 437.228571 | <b>856.423317</b> | 428.715297 | <b>855.439301</b> | 428.223289 | I | <b>600.346386</b>  | 300.676831        | 583.319837  | 292.163557 | 582.335821  | 291.6715 |
| 9  | <b>930.471330</b>  | 465.739303 | <b>913.444781</b> | 457.226029 | 912.460765        | 456.734021 | G | <b>487.262322</b>  | 244.134799        | 470.235773  | 235.621524 | 469.251757  | 235.1295 |
| 10 | 1027.524094        | 514.265685 | 1010.497545       | 505.752411 | 1009.513529       | 505.260403 | P | <b>430.240858</b>  | <b>215.624067</b> | 413.214309  | 207.110792 | 412.230293  | 206.6187 |
| 11 | <b>1098.561208</b> | 549.784242 | 1081.534659       | 541.270968 | 1080.550643       | 540.778960 | A | 333.188094         | 167.097685        | 316.161545  | 158.584410 | 315.177529  | 158.0924 |
| 12 | <b>1185.593236</b> | 593.300256 | 1168.566687       | 584.786982 | 1167.582671       | 584.294974 | S | <b>262.150980</b>  | 131.579128        | 245.124431  | 123.065854 | 244.140415  | 122.5738 |
| 13 |                    |            |                   |            |                   |            | R | 175.118952         | 88.063114         | 158.092403  | 79.549839  |             |          |

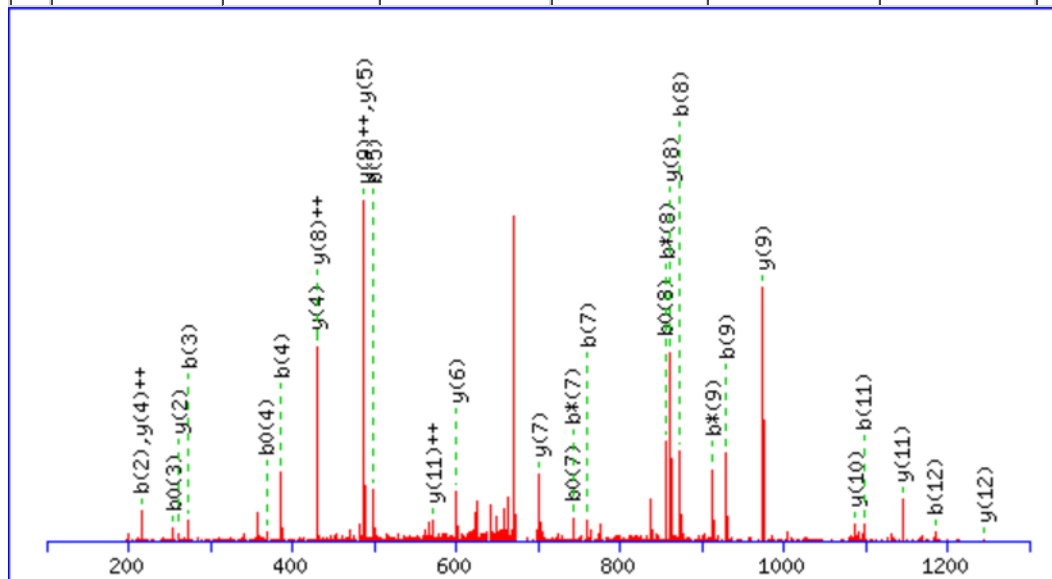

## Peptide View

MS/MS Fragmentation of **CQCPAGAALQADGR**

Found in **IPI00010737**, Tax\_Id=9606 Gene\_Symbol=THBD Thrombomodulin

Experiment: 45 - OPE-3 Fraction: OPE-3

Match to Query 10230: 1473.645248 from(737.829900,2+)

Title: OECHL100317\_31.7372.7372.2.dta

Data file \\Boromir\masse\Data LTQ-Orbitrap\Chrystelle Lacroix\Etude clinique sJPU\OECHL100317\_31.raw

**Monoisotopic mass of neutral peptide Mr(calc):** 1473.645279**Fixed modifications:** Carbamidomethyl (C) (apply to specified residues or termini only)**Ions**

**Score:** 79 **Expect:** 5.6e-007**Matches :** 22/128 fragment ions using 39 most intense peaks ([help](#))

| #  | b                  | b <sup>++</sup> | b*                | b* <sup>++</sup> | b <sup>0</sup> | b <sup>0++</sup> | Seq. | y                  | y <sup>++</sup>   | y*          | y* <sup>++</sup> | y <sup>0</sup> | y <sup>0++</sup> |
|----|--------------------|-----------------|-------------------|------------------|----------------|------------------|------|--------------------|-------------------|-------------|------------------|----------------|------------------|
| 1  | 161.037925         | 81.022600       |                   |                  |                |                  | C    |                    |                   |             |                  |                |                  |
| 2  | <b>289.096503</b>  | 145.051890      | <b>272.069954</b> | 136.538615       |                |                  | Q    | 1314.621912        | 657.814594        | 1297.595363 | 649.301320       | 1296.611347    | 648.8093         |
| 3  | <b>449.127152</b>  | 225.067214      | 432.100603        | 216.553940       |                |                  | C    | <b>1186.563334</b> | <b>593.785305</b> | 1169.536785 | 585.272031       | 1168.552769    | 584.7800         |
| 4  | <b>546.179916</b>  | 273.593596      | 529.153367        | 265.080322       |                |                  | P    | <b>1026.532685</b> | 513.769981        | 1009.506136 | 505.256706       | 1008.522120    | 504.7646         |
| 5  | <b>617.217030</b>  | 309.112153      | 600.190481        | 300.598879       |                |                  | A    | <b>929.479921</b>  | 465.243599        | 912.453372  | 456.730324       | 911.469356     | 456.2383         |
| 6  | <b>674.238494</b>  | 337.622885      | 657.211945        | 329.109611       |                |                  | G    | <b>858.442807</b>  | 429.725042        | 841.416258  | 421.211767       | 840.432242     | 420.7197         |
| 7  | 745.275608         | 373.141442      | 728.249059        | 364.628168       |                |                  | A    | 801.421343         | 401.214310        | 784.394794  | 392.701035       | 783.410778     | 392.2090         |
| 8  | <b>816.312722</b>  | 408.659999      | 799.286173        | 400.146725       |                |                  | A    | 730.384229         | 365.695753        | 713.357680  | 357.182478       | 712.373664     | 356.6904         |
| 9  | <b>929.396786</b>  | 465.202031      | 912.370237        | 456.688757       |                |                  | L    | <b>659.347115</b>  | 330.177196        | 642.320566  | 321.663921       | 641.336550     | 321.1719         |
| 10 | <b>1057.455364</b> | 529.231320      | 1040.428815       | 520.718046       |                |                  | Q    | <b>546.263051</b>  | 273.635164        | 529.236502  | 265.121889       | 528.252486     | 264.6298         |
| 11 | <b>1128.492478</b> | 564.749877      | 1111.465929       | 556.236603       |                |                  | A    | <b>418.204473</b>  | 209.605874        | 401.177924  | 201.092600       | 400.193908     | 200.6005         |
| 12 | <b>1243.519421</b> | 622.263349      | 1226.492872       | 613.750074       | 1225.508856    | 613.258066       | D    | <b>347.167359</b>  | 174.087317        | 330.140810  | 165.574043       | 329.156794     | 165.0820         |
| 13 | <b>1300.540885</b> | 650.774081      | 1283.514336       | 642.260806       | 1282.530320    | 641.768798       | G    | <b>232.140416</b>  | 116.573846        | 215.113867  | 108.060571       |                |                  |
| 14 |                    |                 |                   |                  |                |                  | R    | 175.118952         | 88.063114         | 158.092403  | 79.549839        |                |                  |

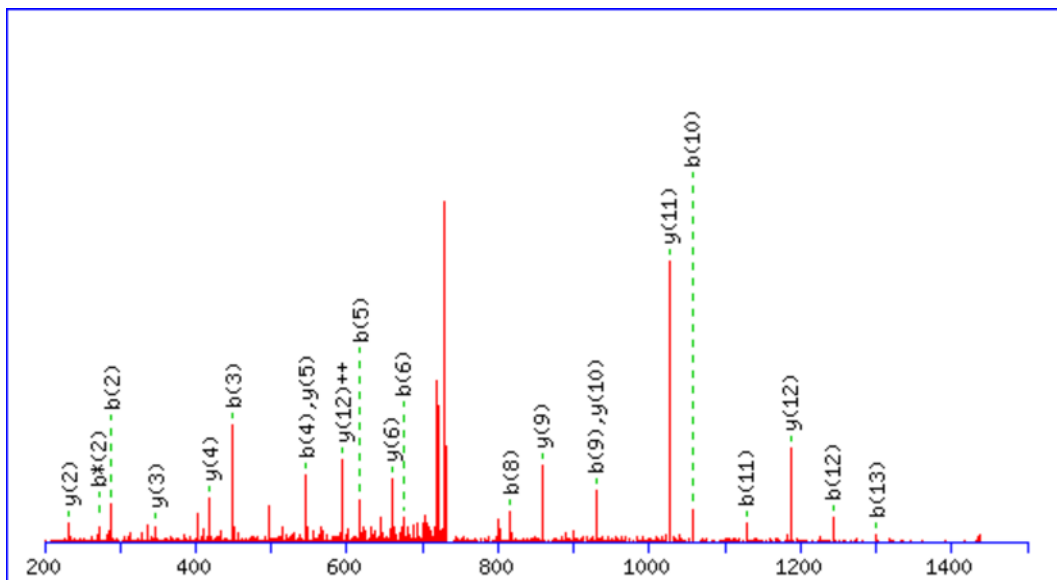

## Peptide View

MS/MS Fragmentation of **HSFKGEECPAGSHR**

Found in **IPI00021970**, Tax\_Id=9606 Gene\_Symbol=MGC31957;TNFRSF10C TNFRSF10C protein

**Experiment:** 45 - OPE-3 **Fraction:** OPE-3

Match to Query 11542: 1597.705248 from(799.859900,2+)

Title: OECHL100317\_31.2235.2235.2.dta

Data file \\Boromir\masse\Data LTQ-Orbitrap\Chrystelle Lacroix\Etude clinique sJPU\OECHL100317\_31.raw

**Monoisotopic mass of neutral peptide Mr(calc):** 1597.705566 **Fixed modifications:** Carbamidomethyl (C) (apply to specified residues or termini only) **Ions**

**Score:** 70 **Expect:** 6.9e-006 **Matches :** 29/144 fragment ions using 54 most intense peaks ([help](#))

| # | b                 | b <sup>++</sup> | b*                | b <sup>*++</sup> | b <sup>0</sup>    | b <sup>0++</sup> | Seq. | y                  | y <sup>++</sup>   | y*          | y <sup>*++</sup> | y <sup>0</sup> | y <sup>0++</sup> |
|---|-------------------|-----------------|-------------------|------------------|-------------------|------------------|------|--------------------|-------------------|-------------|------------------|----------------|------------------|
| 1 | 138.066188        | 69.536732       |                   |                  |                   |                  | H    |                    |                   |             |                  |                |                  |
| 2 | <b>225.098216</b> | 113.052746      |                   |                  | 207.087651        | 104.047463       | S    | <b>1461.653938</b> | <b>731.330607</b> | 1444.627389 | 722.817333       | 1443.643373    | <b>722.3253</b>  |
| 3 | <b>372.166630</b> | 186.586953      |                   |                  | <b>354.156065</b> | 177.581671       | F    | <b>1374.621910</b> | <b>687.814593</b> | 1357.595361 | 679.301319       | 1356.611345    | 678.8093         |
| 4 | <b>500.261593</b> | 250.634435      | <b>483.235044</b> | 242.121160       | <b>482.251028</b> | 241.629152       | K    | <b>1227.553496</b> | <b>614.280386</b> | 1210.526947 | 605.767112       | 1209.542931    | 605.2751         |
| 5 | <b>557.283057</b> | 279.145167      | 540.256508        | 270.631892       | 539.272492        | 270.139884       | G    | <b>1099.458533</b> | 550.232905        | 1082.431984 | 541.719630       | 1081.447968    | 541.2276         |

|    |                    |            |                    |            |             |                   |   |                   |            |             |            |                   |          |
|----|--------------------|------------|--------------------|------------|-------------|-------------------|---|-------------------|------------|-------------|------------|-------------------|----------|
| 6  | <b>686.325650</b>  | 343.666463 | 669.299101         | 335.153189 | 668.315085  | 334.661181        | E | 1042.437069       | 521.722173 | 1025.410520 | 513.208898 | 1024.426504       | 512.7168 |
| 7  | 815.368243         | 408.187760 | 798.341694         | 399.674485 | 797.357678  | 399.182477        | E | <b>913.394476</b> | 457.200876 | 896.367927  | 448.687602 | <b>895.383911</b> | 448.1955 |
| 8  | <b>975.398892</b>  | 488.203084 | 958.372343         | 479.689810 | 957.388327  | 479.197802        | C | <b>784.351883</b> | 392.679580 | 767.325334  | 384.166305 | 766.341318        | 383.6742 |
| 9  | 1072.451656        | 536.729466 | 1055.425107        | 528.216192 | 1054.441091 | <b>527.724184</b> | P | <b>624.321234</b> | 312.664255 | 607.294685  | 304.150981 | 606.310669        | 303.6589 |
| 10 | <b>1143.488770</b> | 572.248023 | 1126.462221        | 563.734749 | 1125.478205 | 563.242741        | A | <b>527.268470</b> | 264.137873 | 510.241921  | 255.624598 | 509.257905        | 255.1325 |
| 11 | <b>1200.510234</b> | 600.758755 | 1183.483685        | 592.245481 | 1182.499669 | 591.753473        | G | <b>456.231356</b> | 228.619316 | 439.204807  | 220.106041 | 438.220791        | 219.6140 |
| 12 | <b>1287.542262</b> | 644.274769 | 1270.515713        | 635.761495 | 1269.531697 | 635.269487        | S | 399.209892        | 200.108584 | 382.183343  | 191.595309 | 381.199327        | 191.1033 |
| 13 | <b>1424.601174</b> | 712.804225 | <b>1407.574625</b> | 704.290951 | 1406.590609 | 703.798943        | H | 312.177864        | 156.592570 | 295.151315  | 148.079295 |                   |          |
| 14 |                    |            |                    |            |             |                   | R | 175.118952        | 88.063114  | 158.092403  | 79.549839  |                   |          |

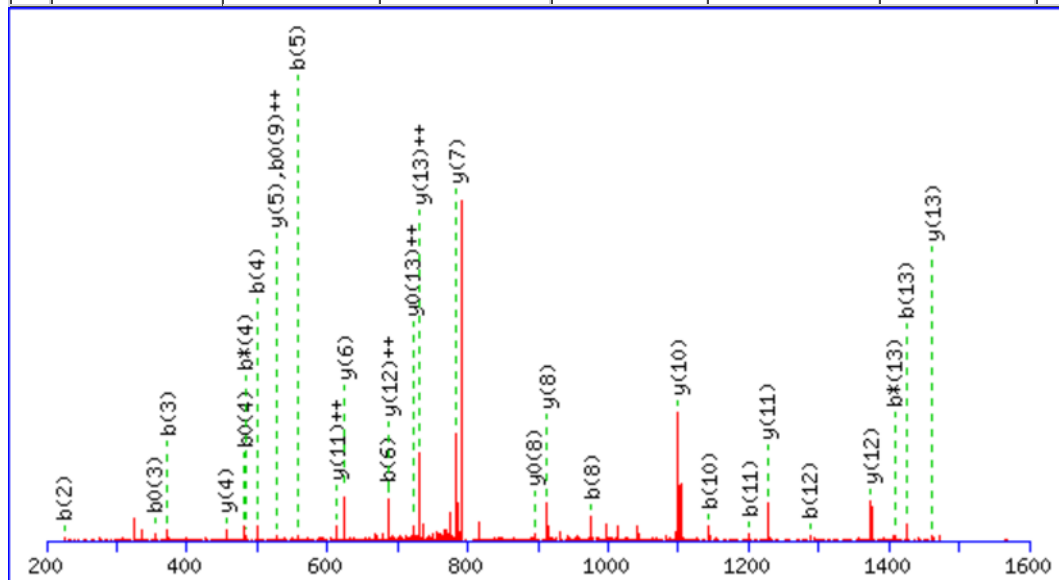

## Peptide View

MS/MS Fragmentation of **NIETIINTFHQYSVK**

Found in **IPI00027462**, Tax\_Id=9606 Gene\_Symbol=S100A9 Protein S100-A9

Experiment: 45 - OPE-3 Fraction: OPE-3

Match to Query 13373: 1805.932848 from(903.973700,2+)

Title: OECHL100317\_31.19372.19372.2.dta

Data file \\Boromir\masse\Data LTQ-Orbitrap\Chrystelle Lacroix\Etude clinique sJPU\OECHL100317\_31.raw

**Monoisotopic mass of neutral peptide Mr(calc):** 1805.931183**Fixed modifications:** Carbamidomethyl (C) (apply to specified residues or termini only)**Ions****Score:** 74 **Expect:** 4.9e-006**Matches :** 29/160 fragment ions using 30 most intense peaks ([help](#))

| #  | b                  | b <sup>++</sup> | b*                | b* <sup>++</sup>  | b <sup>0</sup>    | b <sup>0++</sup>  | Seq. | y                  | y <sup>++</sup>   | y*          | y* <sup>++</sup>  | y <sup>0</sup>     | y <sup>0++</sup> |
|----|--------------------|-----------------|-------------------|-------------------|-------------------|-------------------|------|--------------------|-------------------|-------------|-------------------|--------------------|------------------|
| 1  | 115.050203         | 58.028740       | 98.023654         | 49.515465         |                   |                   | N    |                    |                   |             |                   |                    |                  |
| 2  | 228.134267         | 114.570771      | 211.107718        | 106.057497        |                   |                   | I    | 1692.895549        | 846.951413        | 1675.869000 | 838.438138        | 1674.884984        | 837.9461         |
| 3  | 357.176860         | 179.092068      | 340.150311        | 170.578793        | 339.166295        | 170.086785        | E    | <b>1579.811485</b> | <b>790.409381</b> | 1562.784936 | 781.896106        | <b>1561.800920</b> | 781.4040         |
| 4  | 458.224539         | 229.615907      | <b>441.197990</b> | 221.102633        | <b>440.213974</b> | 220.610625        | T    | <b>1450.768892</b> | <b>725.888084</b> | 1433.742343 | 717.374810        | 1432.758327        | 716.8828         |
| 5  | 571.308603         | 286.157940      | 554.282054        | 277.644665        | <b>553.298038</b> | 277.152657        | I    | <b>1349.721213</b> | 675.364245        | 1332.694664 | <b>666.850970</b> | 1331.710648        | <b>666.3589</b>  |
| 6  | 684.392667         | 342.699972      | 667.366118        | 334.186697        | <b>666.382102</b> | <b>333.694689</b> | I    | <b>1236.637149</b> | 618.822213        | 1219.610600 | 610.308938        | 1218.626584        | 609.8169         |
| 7  | 798.435594         | 399.721435      | 781.409045        | 391.208161        | 780.425029        | 390.716153        | N    | <b>1123.553085</b> | 562.280181        | 1106.526536 | <b>553.766906</b> | 1105.542520        | <b>553.2748</b>  |
| 8  | 899.483273         | 450.245275      | 882.456724        | <b>441.732000</b> | 881.472708        | <b>441.239992</b> | T    | <b>1009.510158</b> | 505.258717        | 992.483609  | <b>496.745443</b> | 991.499593         | <b>496.2534</b>  |
| 9  | 1046.551687        | 523.779482      | 1029.525138       | 515.266207        | 1028.541122       | 514.774199        | F    | 908.462479         | 454.734878        | 891.435930  | 446.221603        | 890.451914         | 445.7295         |
| 10 | 1183.610599        | 592.308938      | 1166.584050       | 583.795663        | 1165.600034       | 583.303655        | H    | <b>761.394065</b>  | 381.200671        | 744.367516  | 372.687396        | 743.383500         | 372.1953         |
| 11 | 1311.669177        | 656.338227      | 1294.642628       | 647.824952        | 1293.658612       | 647.332944        | Q    | <b>624.335153</b>  | 312.671215        | 607.308604  | 304.157940        | 606.324588         | 303.6659         |
| 12 | <b>1474.732506</b> | 737.869891      | 1457.705957       | 729.356617        | 1456.721941       | 728.864609        | Y    | <b>496.276575</b>  | 248.641926        | 479.250026  | 240.128651        | 478.266010         | 239.6366         |
| 13 | <b>1561.764534</b> | 781.385905      | 1544.737985       | 772.872631        | 1543.753969       | 772.380623        | S    | <b>333.213246</b>  | 167.110261        | 316.186697  | 158.596987        | 315.202681         | 158.1049         |
| 14 | <b>1660.832948</b> | 830.920112      | 1643.806399       | 822.406838        | 1642.822383       | 821.914830        | V    | 246.181218         | 123.594247        | 229.154669  | 115.080973        |                    |                  |
| 15 |                    |                 |                   |                   |                   |                   | K    | 147.112804         | 74.060040         | 130.086255  | 65.546765         |                    |                  |

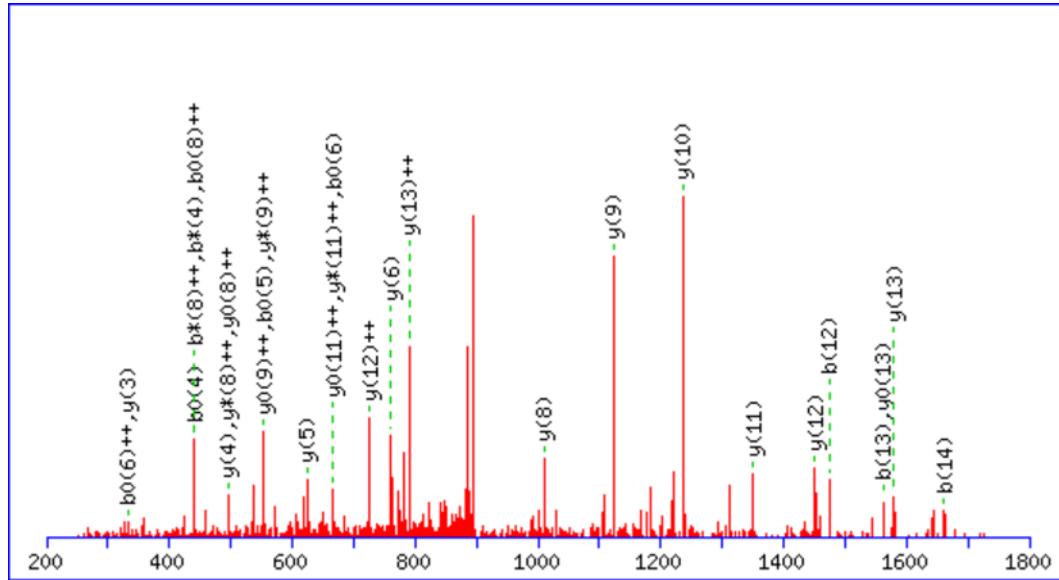

## Peptide View

### MS/MS Fragmentation of **MRETAFEEDVQLPR**

Found in **IPI0008239**, Tax\_Id=9606 Gene\_Symbol=GPRC5B cDNA FLJ55176, highly similar to G-protein coupled receptor family C group 5 member B  
**Experiment:** 45 - OPE-3 **Fraction:** OPE-3

Match to Query 12772: 1719.826048 from(860.920300,2+)

Title: OECHL100317\_31.14388.14388.2.dta

Data file \\Boromir\masse\Data LTQ-Orbitrap\Chrystelle Lacroix\Etude clinique sJPU\OECHL100317\_31.raw

**Monoisotopic mass of neutral peptide Mr(calc):** 1719.824997 **Fixed modifications:** Carbamidomethyl (C) (apply to specified residues or termini only) **Ions**

**Score:** 60 **Expect:** 0.00014 **Matches :** 17/140 fragment ions using 30 most intense peaks ([help](#))

| # | b          | b <sup>++</sup> | b*         | b <sup>*++</sup> | b <sup>0</sup> | b <sup>0++</sup> | Seq. | y           | y <sup>++</sup> | y*          | y <sup>*++</sup> | y <sup>0</sup> | y <sup>0++</sup> |
|---|------------|-----------------|------------|------------------|----------------|------------------|------|-------------|-----------------|-------------|------------------|----------------|------------------|
| 1 | 132.047761 | 66.527518       |            |                  |                |                  | M    |             |                 |             |                  |                |                  |
| 2 | 288.148872 | 144.578074      | 271.122323 | 136.064799       |                |                  | R    | 1589.791812 | 795.399544      | 1572.765263 | 786.886270       | 1571.781247    | 786.3942         |
| 3 | 417.191465 | 209.099370      | 400.164916 | 200.586096       | 399.180900     | 200.094088       | E    | 1433.690701 | 717.348989      | 1416.664152 | 708.835714       | 1415.680136    | 708.3437         |
| 4 | 518.239144 | 259.623210      | 501.212595 | 251.109936       | 500.228579     | 250.617928       | T    | 1304.648108 | 652.827692      | 1287.621559 | 644.314417       | 1286.637543    | 643.8224         |
| 5 | 589.276258 | 295.141767      | 572.249709 | 286.628492       | 571.265693     | 286.136484       | A    | 1203.600429 | 602.303852      | 1186.573880 | 593.790578       | 1185.589864    | 593.2985         |

|    |                    |            |             |            |             |            |   |                   |            |             |            |                   |          |
|----|--------------------|------------|-------------|------------|-------------|------------|---|-------------------|------------|-------------|------------|-------------------|----------|
| 6  | 736.344672         | 368.675974 | 719.318123  | 360.162699 | 718.334107  | 359.670691 | F | 1132.563315       | 566.785296 | 1115.536766 | 558.272021 | 1114.552750       | 557.7800 |
| 7  | 865.387265         | 433.197271 | 848.360716  | 424.683996 | 847.376700  | 424.191988 | E | <b>985.494901</b> | 493.251089 | 968.468352  | 484.737814 | 967.484336        | 484.2458 |
| 8  | <b>994.429858</b>  | 497.718567 | 977.403309  | 489.205292 | 976.419293  | 488.713284 | E | 856.452308        | 428.729792 | 839.425759  | 420.216518 | <b>838.441743</b> | 419.7245 |
| 9  | <b>1109.456801</b> | 555.232039 | 1092.430252 | 546.718764 | 1091.446236 | 546.226756 | D | <b>727.409715</b> | 364.208496 | 710.383166  | 355.695221 | 709.399150        | 355.2032 |
| 10 | 1208.525215        | 604.766246 | 1191.498666 | 596.252971 | 1190.514650 | 595.760963 | V | <b>612.382772</b> | 306.695024 | 595.356223  | 298.181749 |                   |          |
| 11 | <b>1336.583793</b> | 668.795535 | 1319.557244 | 660.282260 | 1318.573228 | 659.790252 | Q | <b>513.314358</b> | 257.160817 | 496.287809  | 248.647542 |                   |          |
| 12 | <b>1449.667857</b> | 725.337566 | 1432.641308 | 716.824292 | 1431.657292 | 716.332284 | L | <b>385.255780</b> | 193.131528 | 368.229231  | 184.618253 |                   |          |
| 13 | 1546.720621        | 773.863948 | 1529.694072 | 765.350674 | 1528.710056 | 764.858666 | P | <b>272.171716</b> | 136.589496 | 255.145167  | 128.076221 |                   |          |
| 14 |                    |            |             |            |             |            | R | 175.118952        | 88.063114  | 158.092403  | 79.549839  |                   |          |

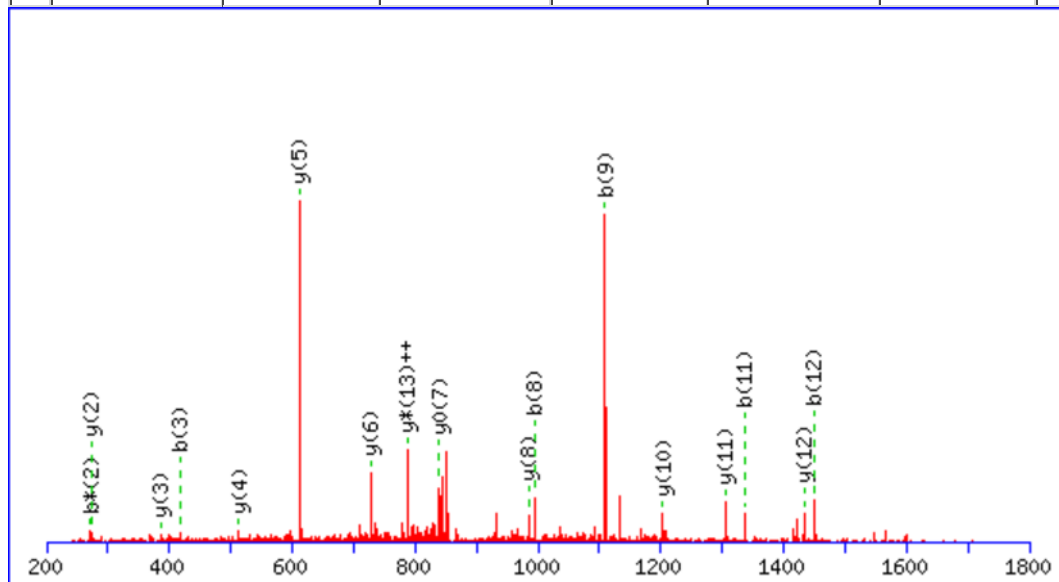

## Peptide View

MS/MS Fragmentation of **DFSLTSSSQTPGATK**

Found in **IPI00291300**, Tax\_Id=9606 Gene\_Symbol=PODXL2 Putative uncharacterized protein PODXL2

**Experiment:** 45 - OPE-3 **Fraction:** OPE-3

Match to Query 10779: 1525.727048 from(763.870800,2+)

Title: OECHL100317\_31.10602.10602.2.dta

Data file \\Boromir\masse\Data LTQ-Orbitrap\Chrystelle Lacroix\Etude clinique sJPU\OECHL100317\_31.raw

**Monoisotopic mass of neutral peptide Mr(calc): 1525.726028**Fixed modifications: Carbamidomethyl (C) (apply to specified residues or termini only)IonsScore: 64 Expect: 4.2e-005Matches : 33/150 fragment ions using 63 most intense peaks ([help](#))

| #  | b                  | b <sup>++</sup> | b*                 | b* <sup>++</sup> | b <sup>0</sup>     | b <sup>0++</sup> | Seq. | y                  | y <sup>++</sup>   | y*          | y* <sup>++</sup>  | y <sup>0</sup>    | y <sup>0++</sup> |
|----|--------------------|-----------------|--------------------|------------------|--------------------|------------------|------|--------------------|-------------------|-------------|-------------------|-------------------|------------------|
| 1  | 116.034219         | 58.520748       |                    |                  | 98.023654          | 49.515465        | D    |                    |                   |             |                   |                   |                  |
| 2  | <b>263.102633</b>  | 132.054954      |                    |                  | 245.092068         | 123.049672       | F    | 1411.706351        | 706.356813        | 1394.679802 | 697.843539        | 1393.695786       | 697.3515         |
| 3  | <b>350.134661</b>  | 175.570968      |                    |                  | <b>332.124096</b>  | 166.565686       | S    | 1264.637937        | 632.822607        | 1247.611388 | 624.309332        | 1246.627372       | <b>623.8173</b>  |
| 4  | 463.218725         | 232.113001      |                    |                  | <b>445.208160</b>  | 223.107718       | L    | <b>1177.605909</b> | <b>589.306592</b> | 1160.579360 | 580.793318        | 1159.595344       | 580.3013         |
| 5  | <b>564.266404</b>  | 282.636840      |                    |                  | 546.255839         | 273.631558       | T    | <b>1064.521845</b> | 532.764561        | 1047.495296 | 524.251286        | 1046.511280       | 523.7592         |
| 6  | 651.298432         | 326.152854      |                    |                  | <b>633.287867</b>  | 317.147572       | S    | <b>963.474166</b>  | 482.240721        | 946.447617  | <b>473.727446</b> | 945.463601        | <b>473.2354</b>  |
| 7  | 738.330460         | 369.668868      |                    |                  | <b>720.319895</b>  | 360.663586       | S    | <b>876.442138</b>  | 438.724707        | 859.415589  | 430.211432        | 858.431573        | 429.7194         |
| 8  | 825.362488         | 413.184882      |                    |                  | 807.351923         | 404.179599       | S    | <b>789.410110</b>  | 395.208693        | 772.383561  | 386.695418        | 771.399545        | 386.2034         |
| 9  | <b>953.421066</b>  | 477.214171      | 936.394517         | 468.700897       | <b>935.410501</b>  | 468.208889       | Q    | <b>702.378082</b>  | 351.692679        | 685.351533  | 343.179404        | 684.367517        | 342.6873         |
| 10 | <b>1054.468745</b> | 527.738010      | <b>1037.442196</b> | 519.224736       | <b>1036.458180</b> | 518.732728       | T    | <b>574.319504</b>  | 287.663390        | 557.292955  | 279.150115        | 556.308939        | 278.6581         |
| 11 | <b>1151.521509</b> | 576.264392      | 1134.494960        | 567.751118       | 1133.510944        | 567.259110       | P    | <b>473.271825</b>  | 237.139550        | 456.245276  | 228.626276        | <b>455.261260</b> | 228.1342         |
| 12 | <b>1208.542973</b> | 604.775124      | 1191.516424        | 596.261850       | 1190.532408        | 595.769842       | G    | <b>376.219061</b>  | 188.613168        | 359.192512  | 180.099894        | 358.208496        | 179.6078         |
| 13 | <b>1279.580087</b> | 640.293681      | 1262.553538        | 631.780407       | <b>1261.569522</b> | 631.288399       | A    | 319.197597         | 160.102436        | 302.171048  | 151.589162        | 301.187032        | 151.0971         |
| 14 | <b>1380.627766</b> | 690.817521      | 1363.601217        | 682.304246       | <b>1362.617201</b> | 681.812238       | T    | <b>248.160483</b>  | 124.583879        | 231.133934  | 116.070605        | 230.149918        | 115.5785         |
| 15 |                    |                 |                    |                  |                    |                  | K    | 147.112804         | 74.060040         | 130.086255  | 65.546765         |                   |                  |



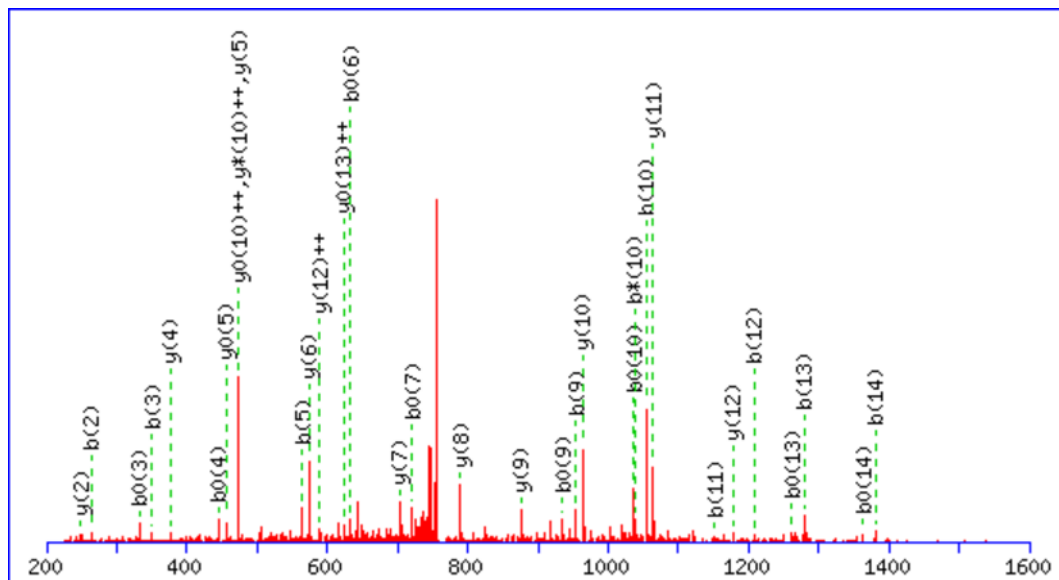

## Peptide View

MS/MS Fragmentation of **GQLPISVTCTIADEIGAR**

Found in **IPI00240345**, Tax\_Id=9606 Gene\_Symbol=CLEC14A C-type lectin domain family 14 member A

**Experiment:** 45 - OPE-3 **Fraction:** OPE-3

Match to Query 13326: 1798.926448 from(900.470500,2+)

Title: OECHL100317\_31.19505.19505.2.dta

Data file \\Boromir\masse\Data LTQ-Orbitrap\Chrystelle Lacroix\Etude clinique sJPU\OECHL100317\_31.raw

**Monoisotopic mass of neutral peptide Mr(calc):** 1798.924728 **Fixed modifications:** Carbamidomethyl (C) (apply to specified residues or termini only) **Ions**

**Score:** 86 **Expect:** 3e-007 **Matches :** 36/172 fragment ions using 71 most intense peaks ([help](#))

| # | b                 | b <sup>++</sup> | b <sup>*</sup>    | b <sup>*++</sup> | b <sup>0</sup> | b <sup>0++</sup> | Seq.     | y                  | y <sup>++</sup>   | y <sup>*</sup> | y <sup>*++</sup>  | y <sup>0</sup> | y <sup>0++</sup> |
|---|-------------------|-----------------|-------------------|------------------|----------------|------------------|----------|--------------------|-------------------|----------------|-------------------|----------------|------------------|
| 1 | 58.028740         | 29.518008       |                   |                  |                |                  | <b>G</b> |                    |                   |                |                   |                |                  |
| 2 | 186.087318        | 93.547297       | 169.060769        | 85.034023        |                |                  | <b>Q</b> | 1742.910548        | 871.958912        | 1725.883999    | 863.445638        | 1724.899983    | 862.9536         |
| 3 | <b>299.171382</b> | 150.089329      | 282.144833        | 141.576055       |                |                  | <b>L</b> | <b>1614.851970</b> | <b>807.929623</b> | 1597.825421    | 799.416349        | 1596.841405    | 798.9243         |
| 4 | 396.224146        | 198.615711      | <b>379.197597</b> | 190.102436       |                |                  | <b>P</b> | <b>1501.767906</b> | <b>751.387591</b> | 1484.741357    | <b>742.874317</b> | 1483.757341    | <b>742.3823</b>  |
| 5 | <b>509.308210</b> | 255.157743      | <b>492.281661</b> | 246.644468       |                |                  | <b>I</b> | <b>1404.715142</b> | 702.861209        | 1387.688593    | 694.347935        | 1386.704577    | 693.8559         |

|    |                    |            |                    |            |             |            |   |                    |                   |                    |            |             |          |
|----|--------------------|------------|--------------------|------------|-------------|------------|---|--------------------|-------------------|--------------------|------------|-------------|----------|
| 6  | <b>596.340238</b>  | 298.673757 | 579.313689         | 290.160483 | 578.329673  | 289.668475 | S | <b>1291.631078</b> | <b>646.319177</b> | <b>1274.604529</b> | 637.805903 | 1273.620513 | 637.3138 |
| 7  | <b>695.408652</b>  | 348.207964 | 678.382103         | 339.694689 | 677.398087  | 339.202681 | V | <b>1204.599050</b> | 602.803163        | 1187.572501        | 594.289889 | 1186.588485 | 593.7978 |
| 8  | <b>796.456331</b>  | 398.731804 | 779.429782         | 390.218529 | 778.445766  | 389.726521 | T | <b>1105.530636</b> | 553.268956        | 1088.504087        | 544.755682 | 1087.520071 | 544.2636 |
| 9  | <b>956.486980</b>  | 478.747128 | 939.460431         | 470.233854 | 938.476415  | 469.741846 | C | <b>1004.482957</b> | 502.745117        | 987.456408         | 494.231842 | 986.472392  | 493.7398 |
| 10 | <b>1069.571044</b> | 535.289160 | 1052.544495        | 526.775886 | 1051.560479 | 526.283878 | I | <b>844.452308</b>  | 422.729792        | 827.425759         | 414.216518 | 826.441743  | 413.7245 |
| 11 | <b>1140.608158</b> | 570.807717 | 1123.581609        | 562.294443 | 1122.597593 | 561.802435 | A | <b>731.368244</b>  | 366.187760        | 714.341695         | 357.674486 | 713.357679  | 357.1824 |
| 12 | <b>1255.635101</b> | 628.321189 | 1238.608552        | 619.807914 | 1237.624536 | 619.315906 | D | <b>660.331130</b>  | 330.669203        | 643.304581         | 322.155929 | 642.320565  | 321.6639 |
| 13 | <b>1384.677694</b> | 692.842485 | <b>1367.651145</b> | 684.329211 | 1366.667129 | 683.837203 | E | <b>545.304187</b>  | 273.155732        | 528.277638         | 264.642457 | 527.293622  | 264.1504 |
| 14 | <b>1497.761758</b> | 749.384517 | <b>1480.735209</b> | 740.871243 | 1479.751193 | 740.379235 | I | <b>416.261594</b>  | 208.634435        | 399.235045         | 200.121160 |             |          |
| 15 | <b>1554.783222</b> | 777.895249 | 1537.756673        | 769.381975 | 1536.772657 | 768.889967 | G | <b>303.177530</b>  | 152.092403        | 286.150981         | 143.579128 |             |          |
| 16 | <b>1625.820336</b> | 813.413806 | 1608.793787        | 804.900532 | 1607.809771 | 804.408524 | A | 246.156066         | 123.581671        | 229.129517         | 115.068396 |             |          |
| 17 |                    |            |                    |            |             |            | R | 175.118952         | 88.063114         | 158.092403         | 79.549839  |             |          |

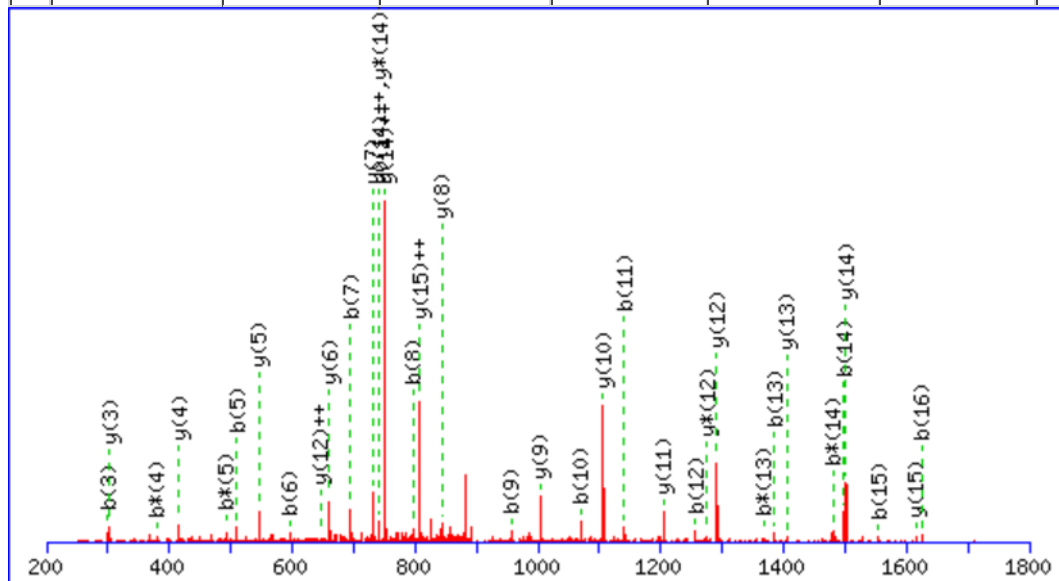

## Peptide View

MS/MS Fragmentation of **GLDTSLGAVQSDTGR**

Found in **IPI00289931**, Tax\_Id=9606 Gene\_Symbol=MADCAM1 MADCAM1 protein

Experiment: 45 - OPE-3 Fraction: OPE-3

Match to Query 10256: 1475.721448 from(738.868000,2+)

Title: OECHL100317\_31.11178.11178.2.dta

Data file \\Boromir\masse\Data LTQ-Orbitrap\Chrystelle Lacroix\Etude clinique sJPU\OECHL100317\_31.raw

**Monoisotopic mass of neutral peptide Mr(calc):** 1475.721619**Fixed modifications:** Carbamidomethyl (C) (apply to specified residues or termini only)**Ions**

**Score:** 85 **Expect:** 4.1e-007**Matches :** 27/142 fragment ions using 39 most intense peaks ([help](#))

| #  | b                  | b <sup>++</sup> | b*          | b <sup>*++</sup> | b <sup>0</sup>     | b <sup>0++</sup> | Seq.     | y                  | y <sup>++</sup> | y*          | y <sup>*++</sup>  | y <sup>0</sup> | y <sup>0++</sup> |
|----|--------------------|-----------------|-------------|------------------|--------------------|------------------|----------|--------------------|-----------------|-------------|-------------------|----------------|------------------|
| 1  | 58.028740          | 29.518008       |             |                  |                    |                  | <b>G</b> |                    |                 |             |                   |                |                  |
| 2  | 171.112804         | 86.060040       |             |                  |                    |                  | <b>L</b> | 1419.707414        | 710.357345      | 1402.680865 | 701.844071        | 1401.696849    | 701.3520         |
| 3  | <b>286.139747</b>  | 143.573512      |             |                  | 268.129182         | 134.568229       | <b>D</b> | 1306.623350        | 653.815313      | 1289.596801 | 645.302039        | 1288.612785    | 644.8100         |
| 4  | <b>387.187426</b>  | 194.097351      |             |                  | 369.176861         | 185.092069       | <b>T</b> | <b>1191.596407</b> | 596.301842      | 1174.569858 | <b>587.788567</b> | 1173.585842    | <b>587.2965</b>  |
| 5  | <b>474.219454</b>  | 237.613365      |             |                  | <b>456.208889</b>  | 228.608082       | <b>S</b> | <b>1090.548728</b> | 545.778002      | 1073.522179 | 537.264728        | 1072.538163    | 536.7727         |
| 6  | <b>587.303518</b>  | 294.155397      |             |                  | <b>569.292953</b>  | 285.150115       | <b>L</b> | <b>1003.516700</b> | 502.261988      | 986.490151  | 493.748714        | 985.506135     | 493.2567         |
| 7  | 644.324982         | 322.666129      |             |                  | 626.314417         | 313.660847       | <b>G</b> | <b>890.432636</b>  | 445.719956      | 873.406087  | 437.206682        | 872.422071     | 436.7146         |
| 8  | <b>715.362096</b>  | 358.184686      |             |                  | <b>697.351531</b>  | 349.179404       | <b>A</b> | <b>833.411172</b>  | 417.209224      | 816.384623  | 408.695950        | 815.400607     | 408.2039         |
| 9  | <b>814.430510</b>  | 407.718893      |             |                  | 796.419945         | 398.713611       | <b>V</b> | <b>762.374058</b>  | 381.690667      | 745.347509  | 373.177393        | 744.363493     | 372.6853         |
| 10 | <b>942.489088</b>  | 471.748182      | 925.462539  | 463.234908       | 924.478523         | 462.742900       | <b>Q</b> | <b>663.305644</b>  | 332.156460      | 646.279095  | 323.643186        | 645.295079     | 323.1511         |
| 11 | <b>1029.521116</b> | 515.264196      | 1012.494567 | 506.750922       | 1011.510551        | 506.258914       | <b>S</b> | <b>535.247066</b>  | 268.127171      | 518.220517  | 259.613897        | 517.236501     | 259.1218         |
| 12 | <b>1144.548059</b> | 572.777668      | 1127.521510 | 564.264393       | 1126.537494        | 563.772385       | <b>D</b> | <b>448.215038</b>  | 224.611157      | 431.188489  | 216.097882        | 430.204473     | 215.6058         |
| 13 | <b>1245.595738</b> | 623.301507      | 1228.569189 | 614.788233       | <b>1227.585173</b> | 614.296225       | <b>T</b> | <b>333.188095</b>  | 167.097685      | 316.161546  | 158.584411        | 315.177530     | 158.0924         |
| 14 | 1302.617202        | 651.812239      | 1285.590653 | 643.298965       | 1284.606637        | 642.806957       | <b>G</b> | <b>232.140416</b>  | 116.573846      | 215.113867  | 108.060571        |                |                  |
| 15 |                    |                 |             |                  |                    |                  | <b>R</b> | 175.118952         | 88.063114       | 158.092403  | 79.549839         |                |                  |

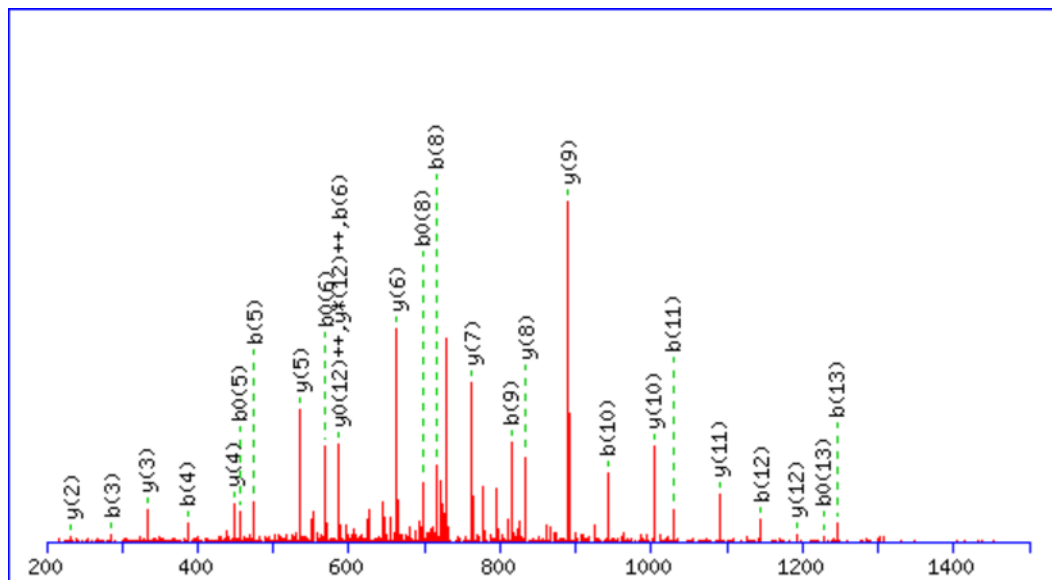

## Peptide View

### MS/MS Fragmentation of **CPLQDFLR**

Found in **IPI00003807**, Tax\_Id=9606 Gene\_Symbol=ACP2 Lysosomal acid phosphatase

**Experiment:** 45 - OPE-3 **Fraction:** OPE-3

Match to Query 4474: 1047.516648 from(524.765600,2+)

Title: OECHL100317\_31.16667.16667.2.dta

Data file \\Boromir\masse\Data LTQ-Orbitrap\Chrystelle Lacroix\Etude clinique sJPU\OECHL100317\_31.raw

**Monoisotopic mass of neutral peptide Mr(calc):** 1047.517151 **Fixed modifications:** Carbamidomethyl (C) (apply to specified residues or termini only) **Ions**

**Score:** 53 **Expect:** 0.00044 **Matches :** 10/64 fragment ions using 18 most intense peaks ([help](#))

| # | b                 | b <sup>++</sup> | b <sup>*</sup> | b <sup>*++</sup> | b <sup>0</sup> | b <sup>0++</sup> | Seq. | y                 | y <sup>++</sup> | y <sup>*</sup> | y <sup>*++</sup> | y <sup>0</sup> | y <sup>0++</sup>  | # |
|---|-------------------|-----------------|----------------|------------------|----------------|------------------|------|-------------------|-----------------|----------------|------------------|----------------|-------------------|---|
| 1 | 161.037925        | 81.022600       |                |                  |                |                  | C    |                   |                 |                |                  |                |                   | 8 |
| 2 | <b>258.090689</b> | 129.548982      |                |                  |                |                  | P    | <b>888.493779</b> | 444.750528      | 871.467230     | 436.237253       | 870.483214     | <b>435.745245</b> | 7 |
| 3 | 371.174753        | 186.091015      |                |                  |                |                  | L    | <b>791.441015</b> | 396.224146      | 774.414466     | 387.710871       | 773.430450     | 387.218863        | 6 |
| 4 | 499.233331        | 250.120304      | 482.206782     | 241.607029       |                |                  | Q    | <b>678.356951</b> | 339.682114      | 661.330402     | 331.168839       | 660.346386     | 330.676831        | 5 |
| 5 | 614.260274        | 307.633775      | 597.233725     | 299.120501       | 596.249709     | 298.628493       | D    | <b>550.298373</b> | 275.652825      | 533.271824     | 267.139550       | 532.287808     | 266.647542        | 4 |

|   |            |            |            |            |            |            |   |            |            |            |            |  |  |   |
|---|------------|------------|------------|------------|------------|------------|---|------------|------------|------------|------------|--|--|---|
| 6 | 761.328688 | 381.167982 | 744.302139 | 372.654708 | 743.318123 | 372.162700 | F | 435.271430 | 218.139353 | 418.244881 | 209.626079 |  |  | 3 |
| 7 | 874.412752 | 437.710014 | 857.386203 | 429.196740 | 856.402187 | 428.704732 | L | 288.203016 | 144.605146 | 271.176467 | 136.091872 |  |  | 2 |
| 8 |            |            |            |            |            |            | R | 175.118952 | 88.063114  | 158.092403 | 79.549840  |  |  | 1 |

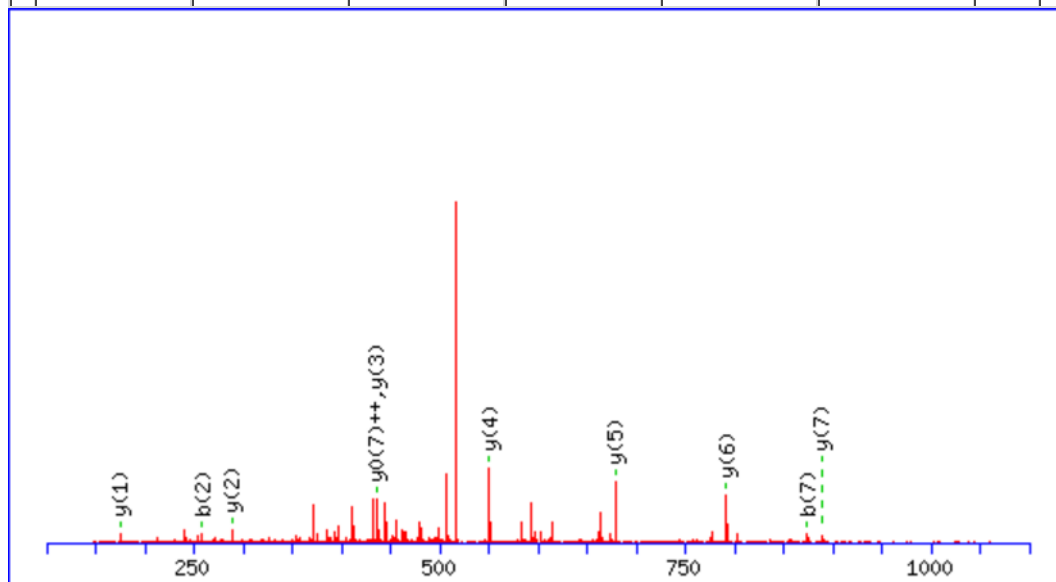

## Peptide View

MS/MS Fragmentation of **FYTIELKVE**

Found in **IPI00022974**, Tax\_Id=9606 Gene\_Symbol=PIP Prolactin-inducible protein

**Experiment:** 45 - OPE-3 **Fraction:** OPE-3

Match to Query 7872: 1253.691648 from(627.853100,2+)

Title: OECHL100317\_31.19121.19121.2.dta

Data file \\Boromir\masse\Data LTQ-Orbitrap\Chrystelle Lacroix\Etude clinique sJPU\OECHL100317\_31.raw

**Monoisotopic mass of neutral peptide Mr(calc):** 1253.690720 **Fixed modifications:** Carbamidomethyl (C) (apply to specified residues or termini only) **Ions**

**Score:** 54 **Expect:** 0.00025 **Matches :** 16/86 fragment ions using 21 most intense peaks ([help](#))

| # | b                 | b <sup>++</sup> | b* | b <sup>*++</sup> | b <sup>0</sup> | b <sup>0++</sup> | Seq. | y                  | y <sup>++</sup> | y*          | y <sup>*++</sup> | y <sup>0</sup> | y <sup>0++</sup> |
|---|-------------------|-----------------|----|------------------|----------------|------------------|------|--------------------|-----------------|-------------|------------------|----------------|------------------|
| 1 | 148.075690        | 74.541483       |    |                  |                |                  | F    |                    |                 |             |                  |                |                  |
| 2 | <b>311.139019</b> | 156.073148      |    |                  |                |                  | Y    | <b>1107.629604</b> | 554.318440      | 1090.603055 | 545.805166       | 1089.619039    | 545.3131         |

|    |                    |                   |             |            |                   |                   |   |                   |            |            |            |            |          |
|----|--------------------|-------------------|-------------|------------|-------------------|-------------------|---|-------------------|------------|------------|------------|------------|----------|
| 3  | <b>412.186698</b>  | 206.596987        |             |            | 394.176133        | 197.591705        | T | <b>944.566275</b> | 472.786776 | 927.539726 | 464.273501 | 926.555710 | 463.7814 |
| 4  | 525.270762         | 263.139019        |             |            | 507.260197        | 254.133737        | I | <b>843.518596</b> | 422.262936 | 826.492047 | 413.749662 | 825.508031 | 413.2576 |
| 5  | 654.313355         | 327.660316        |             |            | 636.302790        | 318.655033        | E | <b>730.434532</b> | 365.720904 | 713.407983 | 357.207630 | 712.423967 | 356.7156 |
| 6  | <b>767.397419</b>  | 384.202348        |             |            | 749.386854        | <b>375.197065</b> | I | 601.391939        | 301.199608 | 584.365390 | 292.686333 | 583.381374 | 292.1943 |
| 7  | <b>880.481483</b>  | 440.744380        |             |            | <b>862.470918</b> | 431.739097        | L | <b>488.307875</b> | 244.657576 | 471.281326 | 236.144301 | 470.297310 | 235.6522 |
| 8  | <b>1008.576446</b> | <b>504.791861</b> | 991.549897  | 496.278587 | 990.565881        | 495.786579        | K | <b>375.223811</b> | 188.115544 | 358.197262 | 179.602269 | 357.213246 | 179.1102 |
| 9  | <b>1107.644860</b> | 554.326068        | 1090.618311 | 545.812794 | 1089.634295       | 545.320786        | V | <b>247.128848</b> | 124.068062 |            |            | 229.118283 | 115.0627 |
| 10 |                    |                   |             |            |                   |                   | E | 148.060434        | 74.533855  |            |            | 130.049869 | 65.5285  |

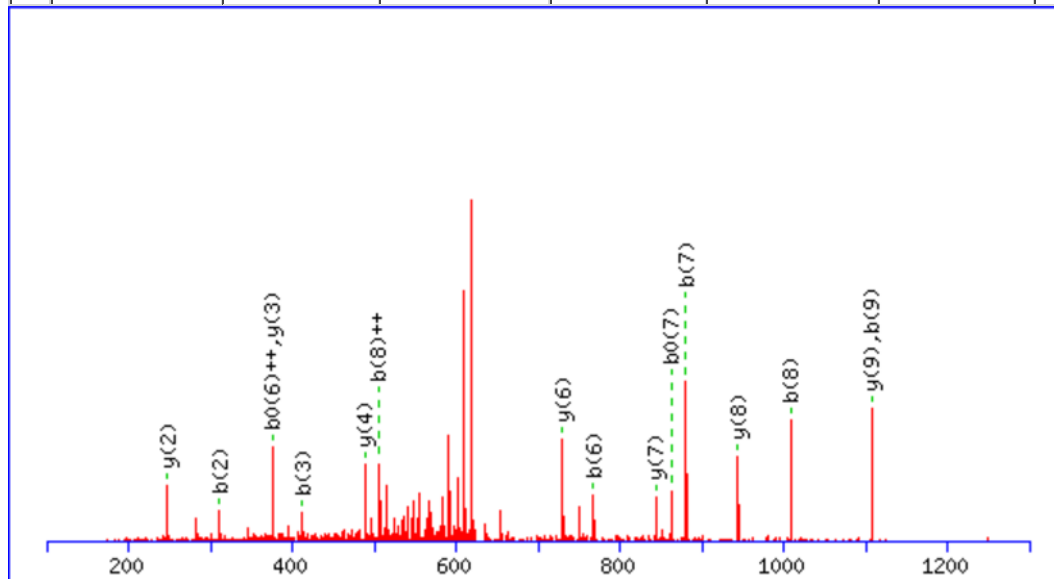

## Peptide View

MS/MS Fragmentation of **LLYDASNLETGVPSR**

Found in **IPI00003111**, Tax\_Id=9606 Gene\_Symbol=LOC652694 Ig kappa chain V-I region AU

**Experiment:** 45 - OPE-3 **Fraction:** OPE-3

Match to Query 12970: 1746.917448 from(874.466000,2+)

Title: OECHL100317\_31.16755.16755.2.dta

Data file \\Boromir\masse\Data LTQ-Orbitrap\Chrystelle Lacroix\Etude clinique sJPU\OECHL100317\_31.raw

**Monoisotopic mass of neutral peptide Mr(calc):** 1746.915192**Fixed modifications:** Carbamidomethyl (C) (apply to specified residues or termini only)**Ions****Score:** 75 **Expect:** 3e-006**Matches :** 26/156 fragment ions using 44 most intense peaks ([help](#))

| #  | b                  | b <sup>++</sup>   | b*                 | b <sup>*++</sup> | b <sup>0</sup> | b <sup>0++</sup> | Seq. | y                  | y <sup>++</sup>   | y*                | y <sup>*++</sup> | y <sup>0</sup>     | y <sup>0++</sup> |
|----|--------------------|-------------------|--------------------|------------------|----------------|------------------|------|--------------------|-------------------|-------------------|------------------|--------------------|------------------|
| 1  | 114.091340         | 57.549308         |                    |                  |                |                  | L    |                    |                   |                   |                  |                    |                  |
| 2  | 227.175404         | 114.091340        |                    |                  |                |                  | L    | 1634.838427        | 817.922852        | 1617.811878       | 809.409577       | 1616.827862        | 808.9175         |
| 3  | 340.259468         | 170.633372        |                    |                  |                |                  | I    | <b>1521.754363</b> | <b>761.380820</b> | 1504.727814       | 752.867545       | 1503.743798        | 752.3755         |
| 4  | 503.322797         | 252.165036        |                    |                  |                |                  | Y    | 1408.670299        | 704.838788        | 1391.643750       | 696.325513       | <b>1390.659734</b> | 695.8335         |
| 5  | <b>618.349740</b>  | 309.678508        |                    |                  | 600.339175     | 300.673226       | D    | <b>1245.606970</b> | 623.307123        | 1228.580421       | 614.793849       | 1227.596405        | 614.3018         |
| 6  | <b>689.386854</b>  | 345.197065        |                    |                  | 671.376289     | 336.191782       | A    | <b>1130.580027</b> | 565.793652        | 1113.553478       | 557.280377       | 1112.569462        | 556.7883         |
| 7  | 776.418882         | 388.713079        |                    |                  | 758.408317     | 379.707796       | S    | <b>1059.542913</b> | 530.275095        | 1042.516364       | 521.761820       | 1041.532348        | 521.2698         |
| 8  | 890.461809         | 445.734542        | 873.435260         | 437.221268       | 872.451244     | 436.729260       | N    | <b>972.510885</b>  | 486.759081        | 955.484336        | 478.245806       | 954.500320         | 477.7537         |
| 9  | <b>1003.545873</b> | 502.276574        | <b>986.519324</b>  | 493.763300       | 985.535308     | 493.271292       | L    | <b>858.467958</b>  | 429.737617        | 841.441409        | 421.224343       | 840.457393         | 420.7323         |
| 10 | <b>1132.588466</b> | 566.797871        | 1115.561917        | 558.284597       | 1114.577901    | 557.792588       | E    | <b>745.383894</b>  | 373.195585        | 728.357345        | 364.682311       | 727.373329         | 364.1903         |
| 11 | <b>1233.636145</b> | <b>617.321710</b> | 1216.609596        | 608.808436       | 1215.625580    | 608.316428       | T    | <b>616.341301</b>  | 308.674289        | 599.314752        | 300.161014       | 598.330736         | 299.6690         |
| 12 | <b>1290.657609</b> | 645.832442        | 1273.631060        | 637.319168       | 1272.647044    | 636.827160       | G    | <b>515.293622</b>  | 258.150449        | 498.267073        | 249.637175       | 497.283057         | 249.1451         |
| 13 | <b>1389.726023</b> | 695.366649        | <b>1372.699474</b> | 686.853375       | 1371.715458    | 686.361367       | V    | <b>458.272158</b>  | 229.639717        | 441.245609        | 221.126443       | 440.261593         | 220.6344         |
| 14 | 1486.778787        | 743.893032        | 1469.752238        | 735.379757       | 1468.768222    | 734.887749       | P    | <b>359.203744</b>  | 180.105510        | <b>342.177195</b> | 171.592236       | <b>341.193179</b>  | 171.1002         |
| 15 | <b>1573.810815</b> | 787.409046        | 1556.784266        | 778.895771       | 1555.800250    | 778.403763       | S    | 262.150980         | 131.579128        | 245.124431        | 123.065854       | 244.140415         | 122.5738         |
| 16 |                    |                   |                    |                  |                |                  | R    | 175.118952         | 88.063114         | 158.092403        | 79.549839        |                    |                  |

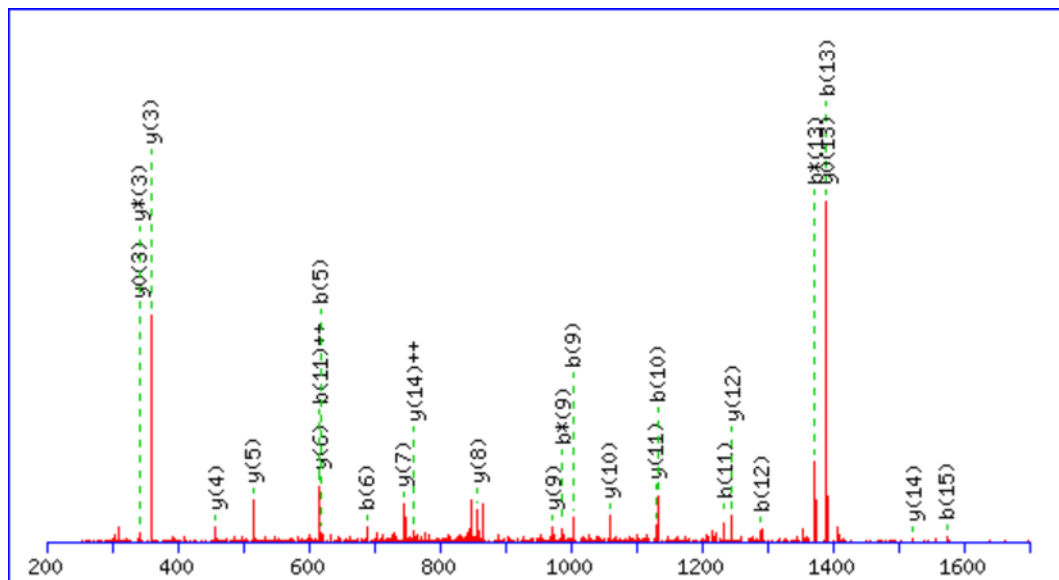

## Peptide View

MS/MS Fragmentation of **VTATGFQCSLIDGR**

Found in **IPI00333140**, Tax\_Id=9606 Gene\_Symbol=DNER Delta and Notch-like epidermal growth factor-related receptor

**Experiment:** 45 - OPE-3 **Fraction:** OPE-3

Match to Query 12182: 1651.799848 from(826.907200,2+)

Title: OECHL100317\_31.13606.13606.2.dta

Data file \\Boromir\masse\Data LTQ-Orbitrap\Chrystelle Lacroix\Etude clinique sJPU\OECHL100317\_31.raw

**Monoisotopic mass of neutral peptide Mr(calc):** 1651.798828 **Fixed modifications:** Carbamidomethyl (C) (apply to specified residues or termini only) **Ions**

**Score:** 72 **Expect:** 8.3e-006 **Matches :** 45/150 fragment ions using 85 most intense peaks ([help](#))

| # | b                 | b <sup>++</sup> | b* | b <sup>*++</sup> | b <sup>0</sup>    | b <sup>0++</sup> | Seq. | y                  | y <sup>++</sup>   | y*                 | y <sup>*++</sup>  | y <sup>0</sup> | y <sup>0++</sup> |
|---|-------------------|-----------------|----|------------------|-------------------|------------------|------|--------------------|-------------------|--------------------|-------------------|----------------|------------------|
| 1 | 100.075690        | 50.541483       |    |                  |                   |                  | V    |                    |                   |                    |                   |                |                  |
| 2 | 201.123369        | 101.065322      |    |                  | 183.112804        | 92.060040        | T    | <b>1553.737670</b> | 777.372473        | 1536.711121        | 768.859198        | 1535.727105    | 768.3671         |
| 3 | <b>272.160483</b> | 136.583879      |    |                  | <b>254.149918</b> | 127.578597       | A    | 1452.689991        | <b>726.848633</b> | <b>1435.663442</b> | <b>718.335359</b> | 1434.679426    | <b>717.8433</b>  |
| 4 | <b>373.208162</b> | 187.107719      |    |                  | <b>355.197597</b> | 178.102437       | T    | <b>1381.652877</b> | <b>691.330076</b> | 1364.626328        | 682.816802        | 1363.642312    | 682.3247         |
| 5 | 430.229626        | 215.618451      |    |                  | 412.219061        | 206.613169       | G    | <b>1280.605198</b> | 640.806237        | 1263.578649        | 632.292962        | 1262.594633    | 631.8009         |



|    |                    |            |                    |            |                    |            |          |                    |                   |                    |                   |                   |                 |
|----|--------------------|------------|--------------------|------------|--------------------|------------|----------|--------------------|-------------------|--------------------|-------------------|-------------------|-----------------|
| 6  | <b>577.298040</b>  | 289.152658 |                    |            | <b>559.287475</b>  | 280.147376 | <b>F</b> | <b>1223.583734</b> | <b>612.295505</b> | 1206.557185        | 603.782230        | 1205.573169       | 603.2902        |
| 7  | 705.356618         | 353.181947 | 688.330069         | 344.668673 | <b>687.346053</b>  | 344.176665 | <b>Q</b> | <b>1076.515320</b> | 538.761298        | <b>1059.488771</b> | <b>530.248023</b> | 1058.504755       | <b>529.7560</b> |
| 8  | 833.415196         | 417.211236 | 816.388647         | 408.697962 | 815.404631         | 408.205954 | <b>Q</b> | <b>948.456742</b>  | 474.732009        | <b>931.430193</b>  | 466.218734        | 930.446177        | 465.7267        |
| 9  | <b>993.445845</b>  | 497.226561 | 976.419296         | 488.713286 | 975.435280         | 488.221278 | <b>C</b> | <b>820.398164</b>  | 410.702720        | <b>803.371615</b>  | 402.189445        | 802.387599        | 401.6974        |
| 10 | <b>1080.477873</b> | 540.742575 | 1063.451324        | 532.229300 | 1062.467308        | 531.737292 | <b>S</b> | <b>660.367515</b>  | <b>330.687395</b> | 643.340966         | 322.174121        | 642.356950        | 321.6821        |
| 11 | <b>1193.561937</b> | 597.284607 | <b>1176.535388</b> | 588.771332 | <b>1175.551372</b> | 588.279324 | <b>L</b> | <b>573.335487</b>  | 287.171381        | 556.308938         | 278.658107        | 555.324922        | 278.1660        |
| 12 | <b>1306.646001</b> | 653.826638 | <b>1289.619452</b> | 645.313364 | <b>1288.635436</b> | 644.821356 | <b>I</b> | <b>460.251423</b>  | 230.629349        | 443.224874         | 222.116075        | <b>442.240858</b> | 221.6240        |
| 13 | <b>1421.672944</b> | 711.340110 | <b>1404.646395</b> | 702.826836 | 1403.662379        | 702.334827 | <b>D</b> | <b>347.167359</b>  | 174.087317        | <b>330.140810</b>  | 165.574043        | <b>329.156794</b> | 165.0820        |
| 14 | <b>1478.694408</b> | 739.850842 | 1461.667859        | 731.337567 | 1460.683843        | 730.845559 | <b>G</b> | <b>232.140416</b>  | 116.573846        | 215.113867         | 108.060571        |                   |                 |
| 15 |                    |            |                    |            |                    |            | <b>R</b> | 175.118952         | 88.063114         | 158.092403         | 79.549839         |                   |                 |

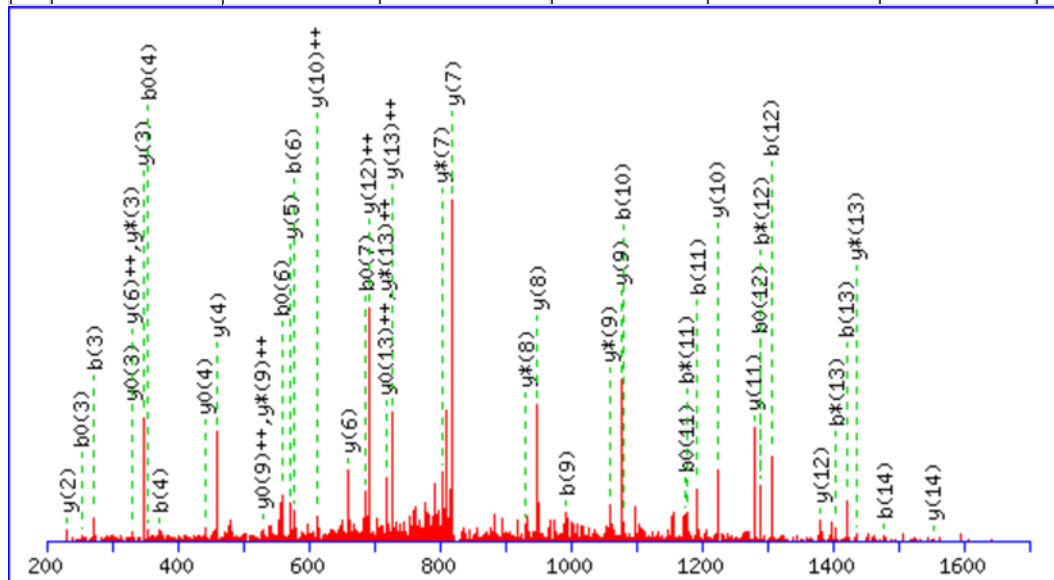

## Peptide View

MS/MS Fragmentation of **ASEQIYYENR**

Found in **IPI00030431**, Tax\_Id=9606 Gene\_Symbol=ANTXR1 Isoform 1 of Anthrax toxin receptor 1

Experiment: 45 - OPE-3 Fraction: OPE-3

Match to Query 8091: 1271.578848 from(636.796700,2+)

Title: OECHL100317\_31.7414.7414.2.dta

Data file \\Boromir\masse\Data LTQ-Orbitrap\Chrystelle Lacroix\Etude clinique sJPU\OECHL100317\_31.raw

**Monoisotopic mass of neutral peptide Mr(calc):** 1271.578186**Fixed modifications:** Carbamidomethyl (C) (apply to specified residues or termini only)**Ions****Score:** 51 **Expect:** 0.0004**Matches :** 14/96 fragment ions using 22 most intense peaks ([help](#))

| #  | b           | b <sup>++</sup> | b*          | b <sup>*++</sup> | b <sup>0</sup> | b <sup>0++</sup> | Seq. | y           | y <sup>++</sup> | y*          | y <sup>*++</sup> | y <sup>0</sup> | y <sup>0++</sup> |
|----|-------------|-----------------|-------------|------------------|----------------|------------------|------|-------------|-----------------|-------------|------------------|----------------|------------------|
| 1  | 72.044390   | 36.525833       |             |                  |                |                  | A    |             |                 |             |                  |                |                  |
| 2  | 159.076418  | 80.041847       |             |                  | 141.065853     | 71.036564        | S    | 1201.548393 | 601.277835      | 1184.521844 | 592.764560       | 1183.537828    | 592.2725         |
| 3  | 288.119011  | 144.563144      |             |                  | 270.108446     | 135.557861       | E    | 1114.516365 | 557.761821      | 1097.489816 | 549.248546       | 1096.505800    | 548.7565         |
| 4  | 416.177589  | 208.592433      | 399.151040  | 200.079158       | 398.167024     | 199.587150       | Q    | 985.473772  | 493.240524      | 968.447223  | 484.727250       | 967.463207     | 484.2352         |
| 5  | 529.261653  | 265.134465      | 512.235104  | 256.621190       | 511.251088     | 256.129182       | I    | 857.415194  | 429.211235      | 840.388645  | 420.697961       | 839.404629     | 420.2059         |
| 6  | 692.324982  | 346.666129      | 675.298433  | 338.152855       | 674.314417     | 337.660847       | Y    | 744.331130  | 372.669203      | 727.304581  | 364.155929       | 726.320565     | 363.6639         |
| 7  | 855.388311  | 428.197794      | 838.361762  | 419.684519       | 837.377746     | 419.192511       | Y    | 581.267801  | 291.137539      | 564.241252  | 282.624264       | 563.257236     | 282.1322         |
| 8  | 984.430904  | 492.719090      | 967.404355  | 484.205816       | 966.420339     | 483.713808       | E    | 418.204472  | 209.605874      | 401.177923  | 201.092600       | 400.193907     | 200.6005         |
| 9  | 1098.473831 | 549.740554      | 1081.447282 | 541.227279       | 1080.463266    | 540.735271       | N    | 289.161879  | 145.084577      | 272.135330  | 136.571303       |                |                  |
| 10 |             |                 |             |                  |                |                  | R    | 175.118952  | 88.063114       | 158.092403  | 79.549839        |                |                  |

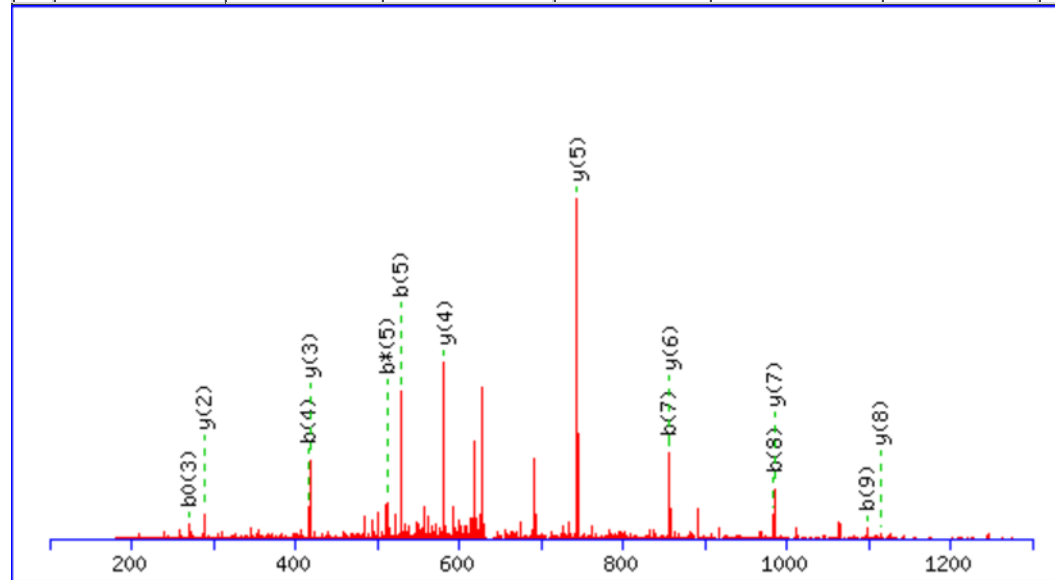

## Peptide View

MS/MS Fragmentation of **LYQQHGAGLFDVTR**Found in **IPI00554538**, Tax\_Id=9606 Gene\_Symbol=TPP1 Putative uncharacterized protein TPP1**Experiment:** 45 - OPE-3 **Fraction:** OPE-3

Match to Query 11608: 1603.811048 from(802.912800,2+)

Title: OECHL100317\_31.13486.13486.2.dta

Data file \\Boromir\masse\Data LTQ-Orbitrap\Chrystelle Lacroix\Etude clinique sJPU\OECHL100317\_31.raw

**Monoisotopic mass of neutral peptide Mr(calc):** 1603.810699**Fixed modifications:** Carbamidomethyl (C) (apply to specified residues or termini only)**Ions****Score:** 51 **Expect:** 0.0011**Matches :** 13/130 fragment ions using 14 most intense peaks ([help](#))

| #  | b           | b <sup>++</sup> | b <sup>*</sup> | b <sup>*++</sup> | b <sup>0</sup> | b <sup>0++</sup> | Seq. | y           | y <sup>++</sup> | y <sup>*</sup> | y <sup>*++</sup> | y <sup>0</sup> | y <sup>0++</sup> |
|----|-------------|-----------------|----------------|------------------|----------------|------------------|------|-------------|-----------------|----------------|------------------|----------------|------------------|
| 1  | 114.091340  | 57.549308       |                |                  |                |                  | L    |             |                 |                |                  |                |                  |
| 2  | 277.154669  | 139.080973      |                |                  |                |                  | Y    | 1491.733905 | 746.370591      | 1474.707356    | 737.857316       | 1473.723340    | 737.3653         |
| 3  | 405.213247  | 203.110262      | 388.186698     | 194.596987       |                |                  | Q    | 1328.670576 | 664.838926      | 1311.644027    | 656.325652       | 1310.660011    | 655.8336         |
| 4  | 533.271825  | 267.139551      | 516.245276     | 258.626276       |                |                  | Q    | 1200.611998 | 600.809637      | 1183.585449    | 592.296363       | 1182.601433    | 591.8043         |
| 5  | 670.330737  | 335.669007      | 653.304188     | 327.155732       |                |                  | H    | 1072.553420 | 536.780348      | 1055.526871    | 528.267074       | 1054.542855    | 527.7750         |
| 6  | 727.352201  | 364.179739      | 710.325652     | 355.666464       |                |                  | G    | 935.494508  | 468.250892      | 918.467959     | 459.737618       | 917.483943     | 459.2456         |
| 7  | 798.389315  | 399.698296      | 781.362766     | 391.185021       |                |                  | A    | 878.473044  | 439.740160      | 861.446495     | 431.226886       | 860.462479     | 430.7348         |
| 8  | 855.410779  | 428.209028      | 838.384230     | 419.695753       |                |                  | G    | 807.435930  | 404.221603      | 790.409381     | 395.708329       | 789.425365     | 395.2163         |
| 9  | 968.494843  | 484.751060      | 951.468294     | 476.237785       |                |                  | L    | 750.414466  | 375.710871      | 733.387917     | 367.197597       | 732.403901     | 366.7055         |
| 10 | 1115.563257 | 558.285267      | 1098.536708    | 549.771992       |                |                  | F    | 637.330402  | 319.168839      | 620.303853     | 310.655565       | 619.319837     | 310.1635         |
| 11 | 1230.590200 | 615.798738      | 1213.563651    | 607.285464       | 1212.579635    | 606.793456       | D    | 490.261988  | 245.634632      | 473.235439     | 237.121358       | 472.251423     | 236.6293         |
| 12 | 1329.658614 | 665.332945      | 1312.632065    | 656.819671       | 1311.648049    | 656.327663       | V    | 375.235045  | 188.121161      | 358.208496     | 179.607886       | 357.224480     | 179.1158         |
| 13 | 1430.706293 | 715.856785      | 1413.679744    | 707.343510       | 1412.695728    | 706.851502       | T    | 276.166631  | 138.586953      | 259.140082     | 130.073679       | 258.156066     | 129.5816         |
| 14 |             |                 |                |                  |                |                  | R    | 175.118952  | 88.063114       | 158.092403     | 79.549839        |                |                  |

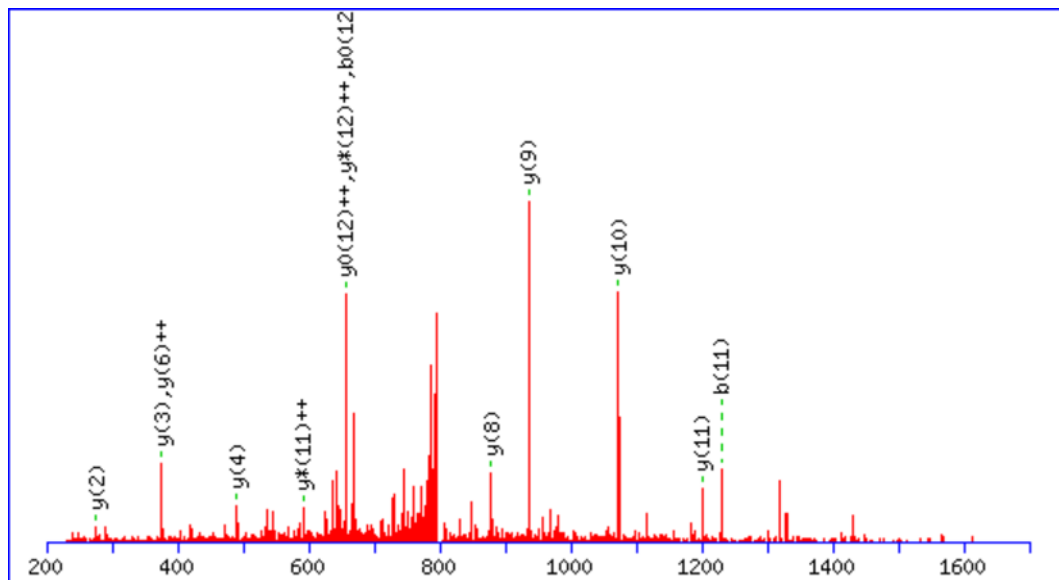

## Peptide View

MS/MS Fragmentation of **ITCAEEGWSPTPK**

Found in **IPI00006154**, Tax\_Id=9606 Gene\_Symbol=CFHR2 Isoform Long of Complement factor H-related protein 2

**Experiment:** 45 - OPE-3 **Fraction:** OPE-3

Match to Query 10242: 1474.677248 from(738.345900,2+)

Title: OECHL100317\_31.10105.10105.2.dta

Data file \\Boromir\masse\Data LTQ-Orbitrap\Chrystelle Lacroix\Etude clinique sJPU\OECHL100317\_31.raw

**Monoisotopic mass of neutral peptide Mr(calc):** 1474.676224 **Fixed modifications:** Carbamidomethyl (C) (apply to specified residues or termini only) **Ions**

**Score:** 64 **Expect:** 3.8e-005 **Matches :** 32/114 fragment ions using 62 most intense peaks ([help](#))

| # | b          | b <sup>++</sup> | b <sup>0</sup> | b <sup>0++</sup> | Seq. | y           | y <sup>++</sup> | y <sup>*</sup> | y <sup>*++</sup> | y <sup>0</sup> | y <sup>0++</sup> | #  |
|---|------------|-----------------|----------------|------------------|------|-------------|-----------------|----------------|------------------|----------------|------------------|----|
| 1 | 114.091340 | 57.549308       |                |                  | I    |             |                 |                |                  |                |                  | 13 |
| 2 | 215.139019 | 108.073147      | 197.128454     | 99.067865        | T    | 1362.599444 | 681.803360      | 1345.572895    | 673.290086       | 1344.588879    | 672.798078       | 12 |
| 3 | 375.169668 | 188.088472      | 357.159103     | 179.083190       | C    | 1261.551765 | 631.279521      | 1244.525216    | 622.766246       | 1243.541200    | 622.274238       | 11 |
| 4 | 446.206782 | 223.607029      | 428.196217     | 214.601747       | A    | 1101.521116 | 551.264196      | 1084.494567    | 542.750922       | 1083.510551    | 542.258914       | 10 |
| 5 | 575.249375 | 288.128326      | 557.238810     | 279.123043       | E    | 1030.484002 | 515.745639      | 1013.457453    | 507.232365       | 1012.473437    | 506.740357       | 9  |

|    |             |            |             |            |   |            |            |            |            |            |            |   |
|----|-------------|------------|-------------|------------|---|------------|------------|------------|------------|------------|------------|---|
| 6  | 704.291968  | 352.649622 | 686.281403  | 343.644340 | E | 901.441409 | 451.224343 | 884.414860 | 442.711068 | 883.430844 | 442.219060 | 8 |
| 7  | 761.313432  | 381.160354 | 743.302867  | 372.155072 | G | 772.398816 | 386.703046 | 755.372267 | 378.189772 | 754.388251 | 377.697764 | 7 |
| 8  | 947.392745  | 474.200011 | 929.382180  | 465.194728 | W | 715.377352 | 358.192314 | 698.350803 | 349.679040 | 697.366787 | 349.187032 | 6 |
| 9  | 1034.424773 | 517.716025 | 1016.414208 | 508.710742 | S | 529.298039 | 265.152658 | 512.271490 | 256.639383 | 511.287474 | 256.147375 | 5 |
| 10 | 1131.477537 | 566.242407 | 1113.466972 | 557.237124 | P | 442.266011 | 221.636644 | 425.239462 | 213.123369 | 424.255446 | 212.631361 | 4 |
| 11 | 1232.525216 | 616.766246 | 1214.514651 | 607.760964 | T | 345.213247 | 173.110262 | 328.186698 | 164.596987 | 327.202682 | 164.104979 | 3 |
| 12 | 1329.577980 | 665.292628 | 1311.567415 | 656.287346 | P | 244.165568 | 122.586422 | 227.139019 | 114.073148 |            |            | 2 |
| 13 |             |            |             |            | K | 147.112804 | 74.060040  | 130.086255 | 65.546765  |            |            | 1 |

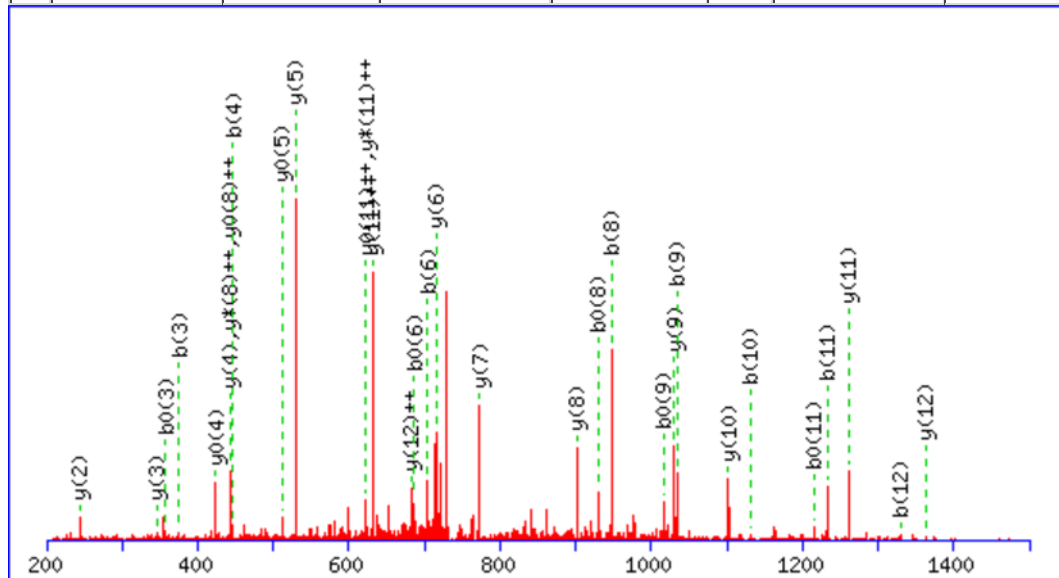

## Peptide View

MS/MS Fragmentation of **SLDLDGIIAEVK**

Found in **IPI00306959**, Tax\_Id=9606 Gene\_Symbol=KRT7 Keratin, type II cytoskeletal 7

Experiment: 45 - OPE-3 Fraction: OPE-3

Match to Query 8105: 1271.696848 from(636.855700,2+)

Title: OECHL100317\_31.19355.19355.2.dta

Data file \\Boromir\masse\Data LTQ-Orbitrap\Chrystelle Lacroix\Etude clinique sJPU\OECHL100317\_31.raw

**Monoisotopic mass of neutral peptide Mr(calc):** 1271.697266**Fixed modifications:** Carbamidomethyl (C) (apply to specified residues or termini only)**Ions****Score:** 55 **Expect:** 0.00031**Matches :** 13/106 fragment ions using 22 most intense peaks ([help](#))

| #  | b                  | b <sup>++</sup> | b <sup>0</sup> | b <sup>0++</sup> | Seq. | y                  | y <sup>++</sup> | y*                | y* <sup>++</sup> | y <sup>0</sup> | y <sup>0++</sup> | #  |
|----|--------------------|-----------------|----------------|------------------|------|--------------------|-----------------|-------------------|------------------|----------------|------------------|----|
| 1  | 88.039304          | 44.523290       | 70.028739      | 35.518008        | S    |                    |                 |                   |                  |                |                  | 12 |
| 2  | <b>201.123368</b>  | 101.065322      | 183.112803     | 92.060039        | L    | 1185.672531        | 593.339904      | 1168.645982       | 584.826629       | 1167.661966    | 584.334621       | 11 |
| 3  | <b>316.150311</b>  | 158.578793      | 298.139746     | 149.573511       | D    | <b>1072.588467</b> | 536.797872      | 1055.561918       | 528.284597       | 1054.577902    | 527.792589       | 10 |
| 4  | <b>429.234375</b>  | 215.120826      | 411.223810     | 206.115543       | L    | <b>957.561524</b>  | 479.284400      | 940.534975        | 470.771126       | 939.550959     | 470.279118       | 9  |
| 5  | 544.261318         | 272.634297      | 526.250753     | 263.629015       | D    | <b>844.477460</b>  | 422.742368      | 827.450911        | 414.229094       | 826.466895     | 413.737086       | 8  |
| 6  | 601.282782         | 301.145029      | 583.272217     | 292.139747       | G    | <b>729.450517</b>  | 365.228897      | 712.423968        | 356.715622       | 711.439952     | 356.223614       | 7  |
| 7  | 714.366846         | 357.687061      | 696.356281     | 348.681779       | I    | 672.429053         | 336.718165      | 655.402504        | 328.204890       | 654.418488     | 327.712882       | 6  |
| 8  | 827.450910         | 414.229093      | 809.440345     | 405.223811       | I    | <b>559.344989</b>  | 280.176133      | 542.318440        | 271.662858       | 541.334424     | 271.170850       | 5  |
| 9  | 898.488024         | 449.747650      | 880.477459     | 440.742368       | A    | <b>446.260925</b>  | 223.634101      | <b>429.234376</b> | 215.120826       | 428.250360     | 214.628818       | 4  |
| 10 | 1027.530617        | 514.268947      | 1009.520052    | 505.263664       | E    | <b>375.223811</b>  | 188.115544      | 358.197262        | 179.602269       | 357.213246     | 179.110261       | 3  |
| 11 | <b>1126.599031</b> | 563.803154      | 1108.588466    | 554.797871       | V    | <b>246.181218</b>  | 123.594247      | 229.154669        | 115.080973       |                |                  | 2  |
| 12 |                    |                 |                |                  | K    | 147.112804         | 74.060040       | 130.086255        | 65.546765        |                |                  | 1  |

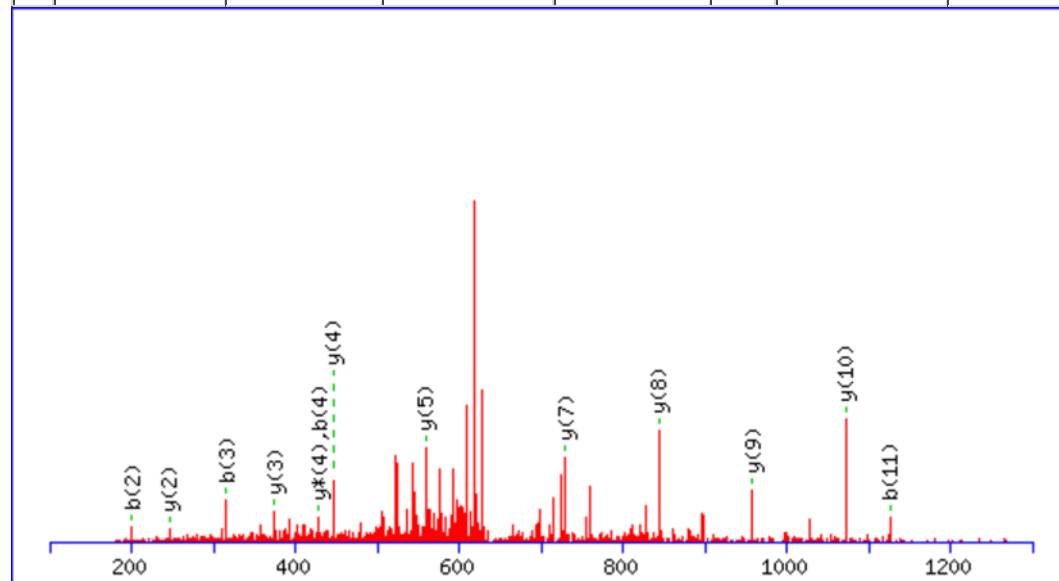

## Peptide View

MS/MS Fragmentation of **SELSACFSR**

Found in **IPI00011899**, Tax\_Id=9606 Gene\_Symbol=BAMBI BMP and activin membrane-bound inhibitor homolog

**Experiment:** 45 - OPE-3 **Fraction:** OPE-3

Match to Query 4557: 1055.470648 from(528.742600,2+)

Title: OECHL100317\_31.10170.10170.2.dta

Data file \\Boromir\masse\Data LTQ-Orbitrap\Chrystelle Lacroix\Etude clinique sJPU\OECHL100317\_31.raw

**Monoisotopic mass of neutral peptide Mr(calc):** 1055.470581 **Fixed modifications:** Carbamidomethyl (C) (apply to specified residues or termini only) **Ions**

**Score:** 56 **Expect:** 6.9e-005 **Matches :** 13/78 fragment ions using 27 most intense peaks ([help](#))

| # | b                 | b <sup>++</sup> | b <sup>0</sup> | b <sup>0++</sup> | Seq. | y                 | y <sup>++</sup>   | y <sup>*</sup> | y <sup>*++</sup> | y <sup>0</sup> | y <sup>0++</sup> | # |
|---|-------------------|-----------------|----------------|------------------|------|-------------------|-------------------|----------------|------------------|----------------|------------------|---|
| 1 | 88.039304         | 44.523290       | 70.028739      | 35.518008        | S    |                   |                   |                |                  |                |                  | 9 |
| 2 | <b>217.081897</b> | 109.044586      | 199.071332     | 100.039304       | E    | <b>969.445842</b> | 485.226559        | 952.419293     | 476.713284       | 951.435277     | 476.221276       | 8 |
| 3 | <b>330.165961</b> | 165.586618      | 312.155396     | 156.581336       | L    | <b>840.403249</b> | <b>420.705263</b> | 823.376700     | 412.191988       | 822.392684     | 411.699980       | 7 |
| 4 | <b>417.197989</b> | 209.102632      | 399.187424     | 200.097350       | S    | <b>727.319185</b> | 364.163231        | 710.292636     | 355.649956       | 709.308620     | 355.157948       | 6 |
| 5 | 488.235103        | 244.621189      | 470.224538     | 235.615907       | A    | <b>640.287157</b> | 320.647217        | 623.260608     | 312.133942       | 622.276592     | 311.641934       | 5 |
| 6 | 648.265752        | 324.636514      | 630.255187     | 315.631232       | C    | <b>569.250043</b> | 285.128660        | 552.223494     | 276.615385       | 551.239478     | 276.123377       | 4 |
| 7 | 795.334166        | 398.170721      | 777.323601     | 389.165438       | F    | <b>409.219394</b> | 205.113335        | 392.192845     | 196.600060       | 391.208829     | 196.108052       | 3 |
| 8 | <b>882.366194</b> | 441.686735      | 864.355629     | 432.681452       | S    | <b>262.150980</b> | 131.579128        | 245.124431     | 123.065853       | 244.140415     | 122.573845       | 2 |
| 9 |                   |                 |                |                  | R    | <b>175.118952</b> | 88.063114         | 158.092403     | 79.549839        |                |                  | 1 |

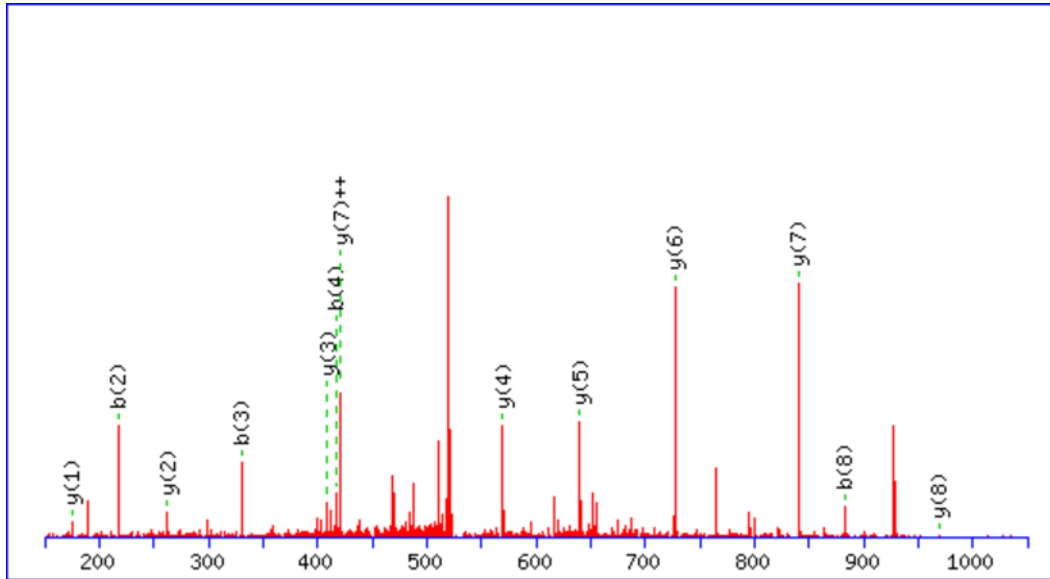

## Peptide View

MS/MS Fragmentation of **YSGSEGSTQTLTKGELK**

Found in **IPI00017526**, Tax\_Id=9606 Gene\_Symbol=S100P Protein S100-P

**Experiment:** 45 - OPE-3 **Fraction:** OPE-3

Match to Query 13245: 1784.881048 from(893.447800,2+)

Title: OECHL100317\_31.7536.7536.2.dta

Data file \\Boromir\masse\Data LTQ-Orbitrap\Chrystelle Lacroix\Etude clinique sJPU\OECHL100317\_31.raw

**Monoisotopic mass of neutral peptide Mr(calc):** 1784.879211 **Fixed modifications:** Carbamidomethyl (C) (apply to specified residues or termini only) **Ions**

**Score:** 56 **Expect:** 0.0004 **Matches :** 11/170 fragment ions using 16 most intense peaks ([help](#))

| # | b          | b <sup>++</sup> | b* | b <sup>*++</sup> | b <sup>0</sup> | b <sup>0++</sup> | Seq. | y           | y <sup>++</sup> | y*          | y <sup>*++</sup> | y <sup>0</sup> | y <sup>0++</sup> |
|---|------------|-----------------|----|------------------|----------------|------------------|------|-------------|-----------------|-------------|------------------|----------------|------------------|
| 1 | 164.070605 | 82.538940       |    |                  |                |                  | Y    |             |                 |             |                  |                |                  |
| 2 | 251.102633 | 126.054954      |    |                  | 233.092068     | 117.049672       | S    | 1622.823172 | 811.915224      | 1605.796623 | 803.401950       | 1604.812607    | 802.9099         |
| 3 | 308.124097 | 154.565687      |    |                  | 290.113532     | 145.560404       | G    | 1535.791144 | 768.399210      | 1518.764595 | 759.885936       | 1517.780579    | 759.3939         |
| 4 | 395.156125 | 198.081701      |    |                  | 377.145560     | 189.076418       | S    | 1478.769680 | 739.888478      | 1461.743131 | 731.375204       | 1460.759115    | 730.8831         |
| 5 | 524.198718 | 262.602997      |    |                  | 506.188153     | 253.597715       | E    | 1391.737652 | 696.372464      | 1374.711103 | 687.859190       | 1373.727087    | 687.3671         |



|    |                    |            |             |            |             |            |   |                    |            |             |            |             |          |
|----|--------------------|------------|-------------|------------|-------------|------------|---|--------------------|------------|-------------|------------|-------------|----------|
| 6  | 581.220182         | 291.113729 |             |            | 563.209617  | 282.108447 | G | <b>1262.695059</b> | 631.851167 | 1245.668510 | 623.337893 | 1244.684494 | 622.8458 |
| 7  | 668.252210         | 334.629743 |             |            | 650.241645  | 325.624461 | S | <b>1205.673595</b> | 603.340436 | 1188.647046 | 594.827161 | 1187.663030 | 594.3351 |
| 8  | 769.299889         | 385.153583 |             |            | 751.289324  | 376.148300 | T | <b>1118.641567</b> | 559.824421 | 1101.615018 | 551.311147 | 1100.631002 | 550.8191 |
| 9  | 897.358467         | 449.182872 | 880.331918  | 440.669597 | 879.347902  | 440.177589 | Q | 1017.593888        | 509.300582 | 1000.567339 | 500.787307 | 999.583323  | 500.2952 |
| 10 | 998.406146         | 499.706711 | 981.379597  | 491.193437 | 980.395581  | 490.701429 | T | 889.535310         | 445.271293 | 872.508761  | 436.758018 | 871.524745  | 436.2660 |
| 11 | 1111.490210        | 556.248743 | 1094.463661 | 547.735469 | 1093.479645 | 547.243461 | L | 788.487631         | 394.747453 | 771.461082  | 386.234179 | 770.477066  | 385.7421 |
| 12 | 1212.537889        | 606.772583 | 1195.511340 | 598.259308 | 1194.527324 | 597.767300 | T | <b>675.403567</b>  | 338.205421 | 658.377018  | 329.692147 | 657.393002  | 329.2001 |
| 13 | 1340.632852        | 670.820064 | 1323.606303 | 662.306790 | 1322.622287 | 661.814782 | K | <b>574.355888</b>  | 287.681582 | 557.329339  | 279.168307 | 556.345323  | 278.6762 |
| 14 | 1397.654316        | 699.330796 | 1380.627767 | 690.817522 | 1379.643751 | 690.325514 | G | <b>446.260925</b>  | 223.634100 | 429.234376  | 215.120826 | 428.250360  | 214.6288 |
| 15 | <b>1526.696909</b> | 763.852093 | 1509.670360 | 755.338818 | 1508.686344 | 754.846810 | E | 389.239461         | 195.123368 | 372.212912  | 186.610094 | 371.228896  | 186.1180 |
| 16 | <b>1639.780973</b> | 820.394124 | 1622.754424 | 811.880850 | 1621.770408 | 811.388842 | L | <b>260.196868</b>  | 130.602072 | 243.170319  | 122.088797 |             |          |
| 17 |                    |            |             |            |             |            | K | 147.112804         | 74.060040  | 130.086255  | 65.546765  |             |          |

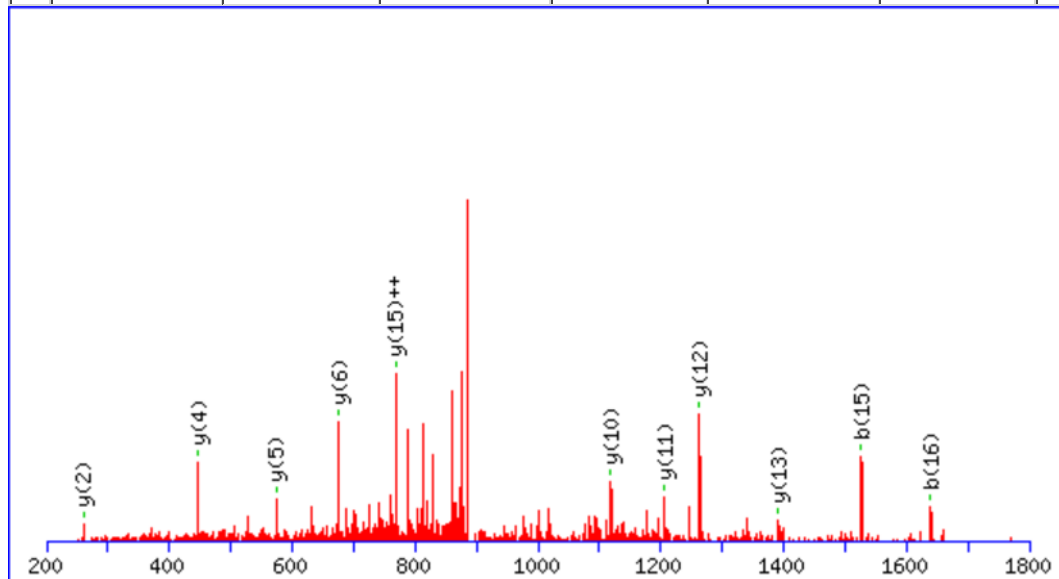

## Peptide View

MS/MS Fragmentation of **ATGDIKVTSEIK**

Found in **IPI00302614**, Tax\_Id=9606 Gene\_Symbol=VTCN1 V-set domain containing T cell activation inhibitor 1

**Experiment:** 45 - OPE-3 **Fraction:** OPE-3

Match to Query 9354: 1389.735048 from(695.874800,2+)

Title: OECHL100317\_31.8088.8088.2.dta

Data file \\Boromir\masse\Data LTQ-Orbitrap\Chrystelle Lacroix\Etude clinique sJPU\OECHL100317\_31.raw

**Monoisotopic mass of neutral peptide Mr(calc):** 1389.735107**Fixed modifications:** Carbamidomethyl (C) (apply to specified residues or termini only)**Ions**

**Score:** 53 **Expect:** 0.00057**Matches :** 10/128 fragment ions using 11 most intense peaks ([help](#))

| #  | b                  | b <sup>++</sup> | b*          | b* <sup>++</sup> | b <sup>0</sup> | b <sup>0++</sup> | Seq. | y                  | y <sup>++</sup> | y*          | y* <sup>++</sup>  | y <sup>0</sup> | y <sup>0++</sup> |
|----|--------------------|-----------------|-------------|------------------|----------------|------------------|------|--------------------|-----------------|-------------|-------------------|----------------|------------------|
| 1  | 72.044390          | 36.525833       |             |                  |                |                  | A    |                    |                 |             |                   |                |                  |
| 2  | 173.092069         | 87.049672       |             |                  | 155.081504     | 78.044390        | T    | 1319.705288        | 660.356282      | 1302.678739 | 651.843008        | 1301.694723    | 651.3509         |
| 3  | 230.113533         | 115.560404      |             |                  | 212.102968     | 106.555122       | G    | 1218.657609        | 609.832442      | 1201.631060 | 601.319168        | 1200.647044    | 600.8271         |
| 4  | <b>345.140476</b>  | 173.073876      |             |                  | 327.129911     | 164.068593       | D    | 1161.636145        | 581.321710      | 1144.609596 | 572.808436        | 1143.625580    | 572.3164         |
| 5  | 458.224540         | 229.615908      |             |                  | 440.213975     | 220.610626       | I    | <b>1046.609202</b> | 523.808239      | 1029.582653 | 515.294964        | 1028.598637    | 514.8029         |
| 6  | 586.319503         | 293.663390      | 569.292954  | 285.150115       | 568.308938     | 284.658107       | K    | <b>933.525138</b>  | 467.266207      | 916.498589  | 458.752932        | 915.514573     | 458.2609         |
| 7  | 685.387917         | 343.197597      | 668.361368  | 334.684322       | 667.377352     | 334.192314       | V    | <b>805.430175</b>  | 403.218725      | 788.403626  | 394.705451        | 787.419610     | 394.2134         |
| 8  | 786.435596         | 393.721436      | 769.409047  | 385.208162       | 768.425031     | 384.716154       | T    | <b>706.361761</b>  | 353.684518      | 689.335212  | <b>345.171244</b> | 688.351196     | 344.6792         |
| 9  | 915.478189         | 458.242733      | 898.451640  | 449.729458       | 897.467624     | 449.237450       | E    | 605.314082         | 303.160679      | 588.287533  | 294.647404        | 587.303517     | 294.1553         |
| 10 | 1002.510217        | 501.758747      | 985.483668  | 493.245472       | 984.499652     | 492.753464       | S    | <b>476.271489</b>  | 238.639382      | 459.244940  | 230.126108        | 458.260924     | 229.6341         |
| 11 | <b>1131.552810</b> | 566.280043      | 1114.526261 | 557.766769       | 1113.542245    | 557.274760       | E    | 389.239461         | 195.123368      | 372.212912  | 186.610094        | 371.228896     | 186.1180         |
| 12 | <b>1244.636874</b> | 622.822075      | 1227.610325 | 614.308800       | 1226.626309    | 613.816792       | I    | <b>260.196868</b>  | 130.602072      | 243.170319  | 122.088797        |                |                  |
| 13 |                    |                 |             |                  |                |                  | K    | 147.112804         | 74.060040       | 130.086255  | 65.546765         |                |                  |

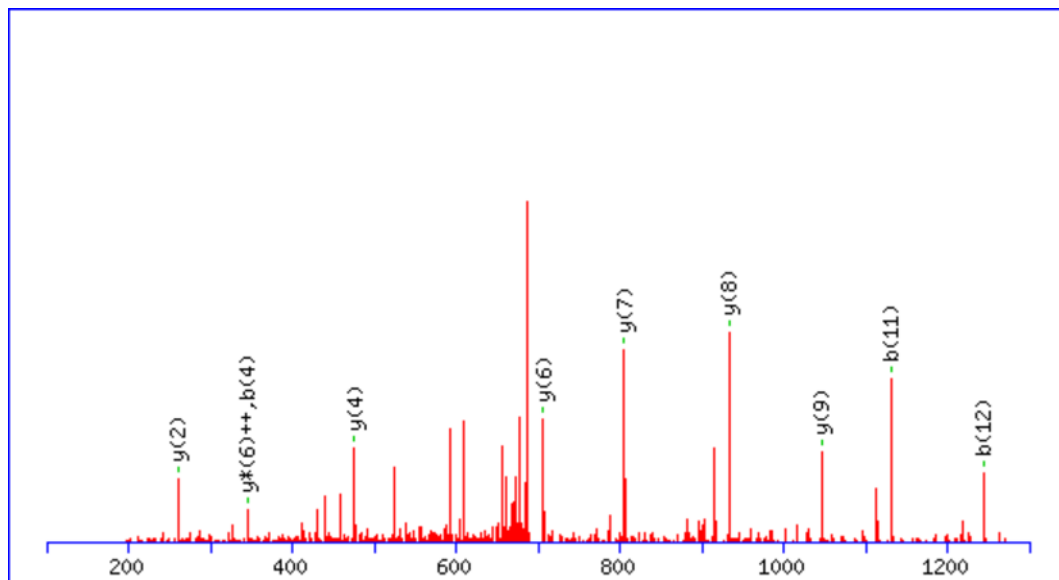

## Peptide View

MS/MS Fragmentation of **KITIADCGQLE**

Found in **IPI00419585**, Tax\_Id=9606 Gene\_Symbol=PPIA Peptidyl-prolyl cis-trans isomerase A

Experiment: 45 - OPE-3 Fraction: OPE-3

Match to Query 7727: 1246.623848 from(624.319200,2+)

Title: OECHL100317\_31.11214.11214.2.dta

Data file \\Boromir\masse\Data LTQ-Orbitrap\Chrystelle Lacroix\Etude clinique sJPU\OECHL100317\_31.raw

**Monoisotopic mass of neutral peptide Mr(calc):** 1246.622726 **Fixed modifications:** Carbamidomethyl (C) (apply to specified residues or termini only) **Ions**

**Score:** 51 **Expect:** 0.0011 **Matches :** 27/112 fragment ions using 44 most intense peaks ([help](#))

| # | b                 | b <sup>++</sup> | b*         | b <sup>*++</sup> | b <sup>0</sup>    | b <sup>0++</sup> | Seq.     | y                  | y <sup>++</sup> | y*                 | y <sup>*++</sup> | y <sup>0</sup>     | y <sup>0++</sup> |
|---|-------------------|-----------------|------------|------------------|-------------------|------------------|----------|--------------------|-----------------|--------------------|------------------|--------------------|------------------|
| 1 | 129.102239        | 65.054757       | 112.075690 | 56.541483        |                   |                  | <b>K</b> |                    |                 |                    |                  |                    |                  |
| 2 | <b>242.186303</b> | 121.596790      | 225.159754 | 113.083515       |                   |                  | <b>I</b> | 1119.535053        | 560.271165      | <b>1102.508504</b> | 551.757890       | <b>1101.524488</b> | <b>551.2658</b>  |
| 3 | <b>343.233982</b> | 172.120629      | 326.207433 | 163.607355       | <b>325.223417</b> | 163.115347       | <b>T</b> | <b>1006.450989</b> | 503.729133      | 989.424440         | 495.215858       | <b>988.440424</b>  | <b>494.7238</b>  |
| 4 | <b>456.318046</b> | 228.662661      | 439.291497 | 220.149387       | <b>438.307481</b> | 219.657379       | <b>I</b> | <b>905.403310</b>  | 453.205293      | 888.376761         | 444.692019       | 887.392745         | 444.2000         |
| 5 | <b>527.355160</b> | 264.181218      | 510.328611 | 255.667944       | 509.344595        | 255.175936       | <b>A</b> | <b>792.319246</b>  | 396.663261      | 775.292697         | 388.149987       | 774.308681         | 387.6579         |

|    |             |            |             |            |             |            |   |            |            |            |            |            |          |
|----|-------------|------------|-------------|------------|-------------|------------|---|------------|------------|------------|------------|------------|----------|
| 6  | 642.382103  | 321.694690 | 625.355554  | 313.181415 | 624.371538  | 312.689407 | D | 721.282132 | 361.144704 | 704.255583 | 352.631430 | 703.271567 | 352.1394 |
| 7  | 802.412752  | 401.710014 | 785.386203  | 393.196740 | 784.402187  | 392.704732 | C | 606.255189 | 303.631233 | 589.228640 | 295.117958 | 588.244624 | 294.6259 |
| 8  | 859.434216  | 430.220746 | 842.407667  | 421.707472 | 841.423651  | 421.215464 | G | 446.224540 | 223.615908 | 429.197991 | 215.102634 | 428.213975 | 214.6106 |
| 9  | 987.492794  | 494.250035 | 970.466245  | 485.736761 | 969.482229  | 485.244753 | Q | 389.203076 | 195.105176 | 372.176527 | 186.591902 | 371.192511 | 186.0998 |
| 10 | 1100.576858 | 550.792067 | 1083.550309 | 542.278793 | 1082.566293 | 541.786785 | L | 261.144498 | 131.075887 |            |            | 243.133933 | 122.0706 |
| 11 |             |            |             |            |             |            | E | 148.060434 | 74.533855  |            |            | 130.049869 | 65.5285  |

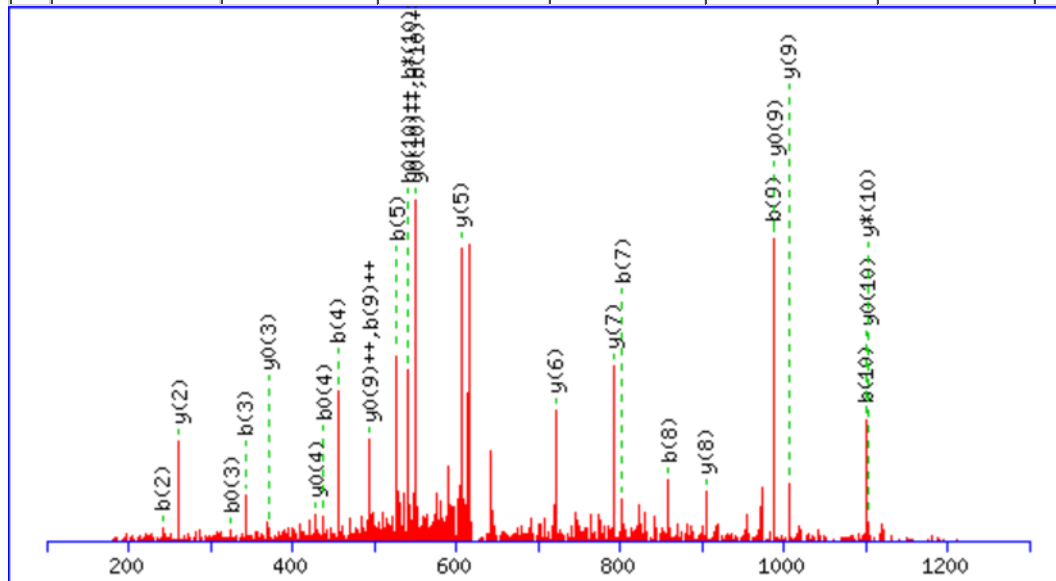

## Peptide View

MS/MS Fragmentation of **NPVLQQDAHSSVTITPQR**

Found in **IPI00410488**, Tax\_Id=9606 Gene\_Symbol=CD276 Isoform 1 of CD276 antigen

Experiment: 12 - S\_D-3 Fraction: S\_D-3

Match to Query 15799: 1990.024648 from(996.019600,2+)

Title: OECHL100317\_29.10278.10278.2.dta

Data file \\Boromir\masse\Data LTQ-Orbitrap\Chrystelle Lacroix\Etude clinique sJPU\OECHL100317\_29.raw

**Monoisotopic mass of neutral peptide Mr(calc):** 1990.023209 **Fixed modifications:** Carbamidomethyl (C) (apply to specified residues or termini only) **Ions**

**Score:** 94 **Expect:** 5.5e-008 **Matches :** 51/186 fragment ions using 80 most intense peaks ([help](#))

| #  | <b>b</b>    | <b>b<sup>++</sup></b> | <b>b*</b>   | <b>b*<sup>++</sup></b> | <b>b<sup>0</sup></b> | <b>b<sup>0++</sup></b> | Seq. | <b>y</b>    | <b>y<sup>++</sup></b> | <b>y*</b>   | <b>y*<sup>++</sup></b> | <b>y<sup>0</sup></b> | <b>y<sup>0++</sup></b> |
|----|-------------|-----------------------|-------------|------------------------|----------------------|------------------------|------|-------------|-----------------------|-------------|------------------------|----------------------|------------------------|
| 1  | 115.050203  | 58.028740             | 98.023654   | 49.515465              |                      |                        | N    |             |                       |             |                        |                      |                        |
| 2  | 212.102967  | 106.555121            | 195.076418  | 98.041847              |                      |                        | P    | 1876.987553 | 938.997415            | 1859.961004 | 930.484140             | 1858.976988          | 929.9921               |
| 3  | 311.171381  | 156.089328            | 294.144832  | 147.576054             |                      |                        | V    | 1779.934789 | 890.471033            | 1762.908240 | 881.957758             | 1761.924224          | 881.4657               |
| 4  | 424.255445  | 212.631361            | 407.228896  | 204.118086             |                      |                        | L    | 1680.866375 | 840.936826            | 1663.839826 | 832.423551             | 1662.855810          | 831.9315               |
| 5  | 552.314023  | 276.660650            | 535.287474  | 268.147375             |                      |                        | Q    | 1567.782311 | 784.394794            | 1550.755762 | 775.881519             | 1549.771746          | 775.3895               |
| 6  | 680.372601  | 340.689939            | 663.346052  | 332.176664             |                      |                        | Q    | 1439.723733 | 720.365505            | 1422.697184 | 711.852230             | 1421.713168          | 711.3602               |
| 7  | 795.399544  | 398.203410            | 778.372995  | 389.690136             | 777.388979           | 389.198128             | D    | 1311.665155 | 656.336215            | 1294.638606 | 647.822941             | 1293.654590          | 647.3309               |
| 8  | 866.436658  | 433.721967            | 849.410109  | 425.208693             | 848.426093           | 424.716685             | A    | 1196.638212 | 598.822744            | 1179.611663 | 590.309470             | 1178.627647          | 589.8174               |
| 9  | 1003.495570 | 502.251423            | 986.469021  | 493.738149             | 985.485005           | 493.246141             | H    | 1125.601098 | 563.304187            | 1108.574549 | 554.790913             | 1107.590533          | 554.2989               |
| 10 | 1090.527598 | 545.767437            | 1073.501049 | 537.254163             | 1072.517033          | 536.762155             | S    | 988.542186  | 494.774731            | 971.515637  | 486.261457             | 970.531621           | 485.7694               |
| 11 | 1177.559626 | 589.283451            | 1160.533077 | 580.770177             | 1159.549061          | 580.278169             | S    | 901.510158  | 451.258717            | 884.483609  | 442.745443             | 883.499593           | 442.2534               |
| 12 | 1276.628040 | 638.817658            | 1259.601491 | 630.304384             | 1258.617475          | 629.812376             | V    | 814.478130  | 407.742703            | 797.451581  | 399.229428             | 796.467565           | 398.7374               |
| 13 | 1377.675719 | 689.341498            | 1360.649170 | 680.828223             | 1359.665154          | 680.336215             | T    | 715.409716  | 358.208496            | 698.383167  | 349.695221             | 697.399151           | 349.2032               |
| 14 | 1490.759783 | 745.883530            | 1473.733234 | 737.370255             | 1472.749218          | 736.878247             | I    | 614.362037  | 307.684656            | 597.335488  | 299.171382             | 596.351472           | 298.6793               |
| 15 | 1591.807462 | 796.407369            | 1574.780913 | 787.894095             | 1573.796897          | 787.402087             | T    | 501.277973  | 251.142624            | 484.251424  | 242.629350             | 483.267408           | 242.1373               |
| 16 | 1688.860226 | 844.933751            | 1671.833677 | 836.420477             | 1670.849661          | 835.928469             | P    | 400.230294  | 200.618785            | 383.203745  | 192.105510             |                      |                        |
| 17 | 1816.918804 | 908.963040            | 1799.892255 | 900.449766             | 1798.908239          | 899.957758             | Q    | 303.177530  | 152.092403            | 286.150981  | 143.579128             |                      |                        |
| 18 |             |                       |             |                        |                      |                        | R    | 175.118952  | 88.063114             | 158.092403  | 79.549839              |                      |                        |

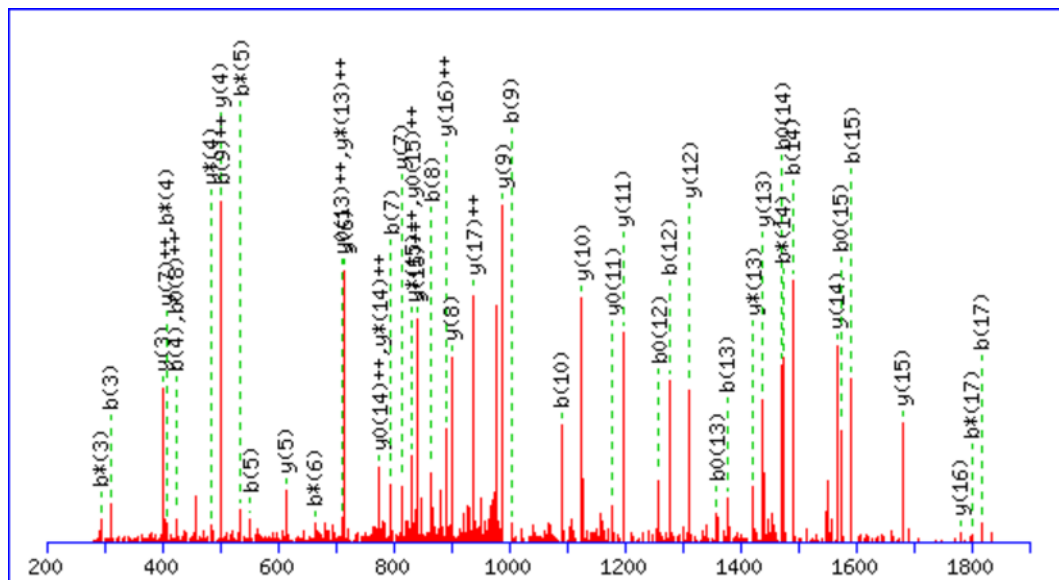

## Peptide View

MS/MS Fragmentation of **AHGQESAI FNEVAPGYFSR**

Found in **IPI00170635**, Tax\_Id=9606 Gene\_Symbol=SECTM1 Secreted and transmembrane protein 1

**Experiment:** 12 - S\_D-3 **Fraction:** S\_D-3

Match to Query 16362: 2078.985448 from(1040.500000,2+)

Title: OECHL100317\_29.17697.17697.2.dta

Data file \\Boromir\masse\Data LTQ-Orbitrap\Chrystelle Lacroix\Etude clinique sJPU\OECHL100317\_29.raw

**Monoisotopic mass of neutral peptide Mr(calc):** 2078.980988 **Fixed modifications:** Carbamidomethyl (C) (apply to specified residues or termini only) **Ions**

**Score:** 86 **Expect:** 4.7e-007 **Matches :** 39/200 fragment ions using 68 most intense peaks ([help](#))

| # | b          | b <sup>++</sup> | b*         | b <sup>*++</sup> | b <sup>0</sup> | b <sup>0++</sup> | Seq. | y           | y <sup>++</sup> | y*          | y <sup>*++</sup> | y <sup>0</sup> | y <sup>0++</sup> |
|---|------------|-----------------|------------|------------------|----------------|------------------|------|-------------|-----------------|-------------|------------------|----------------|------------------|
| 1 | 72.044390  | 36.525833       |            |                  |                |                  | A    |             |                 |             |                  |                |                  |
| 2 | 209.103302 | 105.055289      |            |                  |                |                  | H    | 2008.951166 | 1004.979221     | 1991.924617 | 996.465947       | 1990.940601    | 995.973          |
| 3 | 266.124766 | 133.566021      |            |                  |                |                  | G    | 1871.892254 | 936.449765      | 1854.865705 | 927.936491       | 1853.881689    | 927.444          |
| 4 | 394.183344 | 197.595310      | 377.156795 | 189.082035       |                |                  | Q    | 1814.870790 | 907.939033      | 1797.844241 | 899.425759       | 1796.860225    | 898.933          |
| 5 | 523.225937 | 262.116607      | 506.199388 | 253.603332       | 505.215372     | 253.111324       | E    | 1686.812212 | 843.909744      | 1669.785663 | 835.396470       | 1668.801647    | 834.904          |

|    |                    |                   |                    |            |                   |            |   |                    |            |             |                   |                    |                |
|----|--------------------|-------------------|--------------------|------------|-------------------|------------|---|--------------------|------------|-------------|-------------------|--------------------|----------------|
| 6  | <b>610.257965</b>  | 305.632621        | 593.231416         | 297.119346 | <b>592.247400</b> | 296.627338 | S | <b>1557.769619</b> | 779.388448 | 1540.743070 | 770.875173        | <b>1539.759054</b> | 770.383        |
| 7  | <b>681.295079</b>  | 341.151178        | 664.268530         | 332.637903 | <b>663.284514</b> | 332.145895 | A | <b>1470.737591</b> | 735.872434 | 1453.711042 | <b>727.359159</b> | 1452.727026        | <b>726.867</b> |
| 8  | <b>794.379143</b>  | 397.693210        | 777.352594         | 389.179935 | 776.368578        | 388.687927 | I | <b>1399.700477</b> | 700.353877 | 1382.673928 | 691.840602        | 1381.689912        | 691.348        |
| 9  | <b>941.447557</b>  | 471.227417        | 924.421008         | 462.714142 | <b>923.436992</b> | 462.222134 | F | <b>1286.616413</b> | 643.811845 | 1269.589864 | 635.298570        | 1268.605848        | 634.806        |
| 10 | 1055.490484        | 528.248880        | 1038.463935        | 519.735606 | 1037.479919       | 519.243597 | N | <b>1139.547999</b> | 570.277638 | 1122.521450 | 561.764363        | 1121.537434        | 561.272        |
| 11 | <b>1184.533077</b> | <b>592.770176</b> | 1167.506528        | 584.256902 | 1166.522512       | 583.764894 | E | <b>1025.505072</b> | 513.256174 | 1008.478523 | <b>504.742900</b> | 1007.494507        | 504.250        |
| 12 | <b>1283.601491</b> | 642.304383        | 1266.574942        | 633.791109 | 1265.590926       | 633.299101 | V | <b>896.462479</b>  | 448.734878 | 879.435930  | 440.221603        | 878.451914         | 439.729        |
| 13 | <b>1354.638605</b> | 677.822940        | <b>1337.612056</b> | 669.309666 | 1336.628040       | 668.817658 | A | <b>797.394065</b>  | 399.200671 | 780.367516  | 390.687396        | 779.383500         | 390.195        |
| 14 | 1451.691369        | <b>726.349322</b> | 1434.664820        | 717.836048 | 1433.680804       | 717.344040 | P | <b>726.356951</b>  | 363.682114 | 709.330402  | 355.168839        | 708.346386         | 354.676        |
| 15 | <b>1508.712833</b> | 754.860054        | 1491.686284        | 746.346780 | 1490.702268       | 745.854772 | G | <b>629.304187</b>  | 315.155732 | 612.277638  | 306.642457        | 611.293622         | 306.150        |
| 16 | <b>1671.776162</b> | 836.391719        | 1654.749613        | 827.878445 | 1653.765597       | 827.386436 | Y | 572.282723         | 286.645000 | 555.256174  | 278.131725        | 554.272158         | 277.639        |
| 17 | <b>1818.844576</b> | 909.925926        | 1801.818027        | 901.412652 | 1800.834011       | 900.920643 | F | <b>409.219394</b>  | 205.113335 | 392.192845  | 196.600061        | 391.208829         | 196.108        |
| 18 | <b>1905.876604</b> | 953.441940        | 1888.850055        | 944.928666 | 1887.866039       | 944.436658 | S | 262.150980         | 131.579128 | 245.124431  | 123.065854        | 244.140415         | 122.573        |
| 19 |                    |                   |                    |            |                   |            | R | 175.118952         | 88.063114  | 158.092403  | 79.549840         |                    |                |

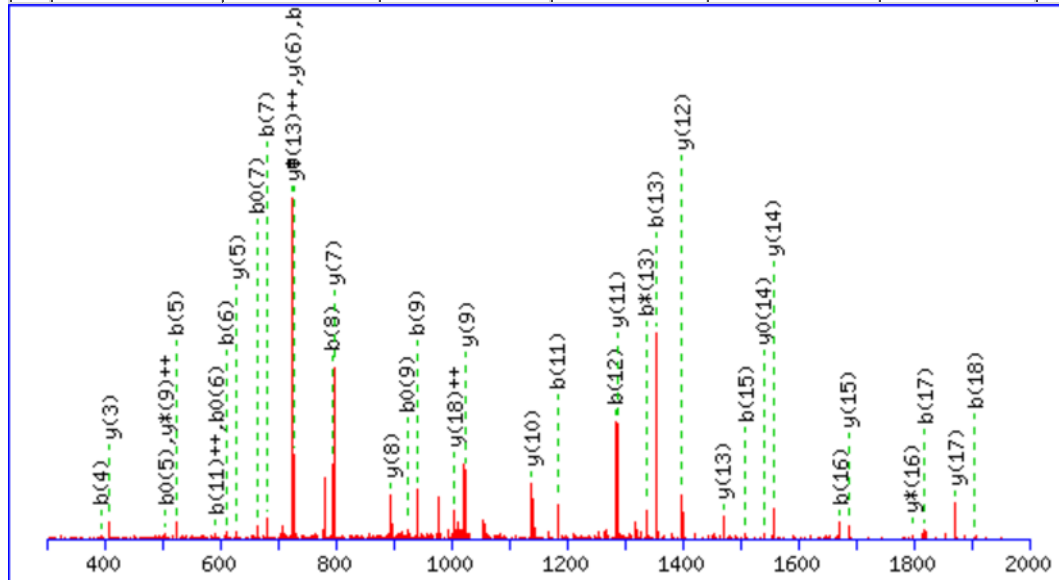

## Peptide View

MS/MS Fragmentation of **VVAGEVQVQR**Found in **IPI00056478**, Tax\_Id=9606 Gene\_Symbol=IGSF8 Isoform 1 of Immunoglobulin superfamily member 8**Experiment:** 12 - S\_D-3 **Fraction:** S\_D-3

Match to Query 5679: 1083.602848 from(542.808700,2+)

Title: OECHL100317\_29.5879.5879.2.dta

Data file \\Boromir\masse\Data LTQ-Orbitrap\Chrystelle Lacroix\Etude clinique sJPU\OECHL100317\_29.raw

**Monoisotopic mass of neutral peptide Mr(calc):** 1083.603668**Fixed modifications:** Carbamidomethyl (C) (apply to specified residues or termini only)**Ions****Score:** 68 **Expect:** 1e-005**Matches :** 20/78 fragment ions using 36 most intense peaks ([help](#))

| #  | b                 | b <sup>++</sup>   | b*         | b <sup>*++</sup> | b <sup>0</sup> | b <sup>0++</sup> | Seq. | y                 | y <sup>++</sup>   | y*                | y <sup>*++</sup> | y <sup>0</sup>    | y <sup>0++</sup> | #  |
|----|-------------------|-------------------|------------|------------------|----------------|------------------|------|-------------------|-------------------|-------------------|------------------|-------------------|------------------|----|
| 1  | 100.075690        | 50.541483         |            |                  |                |                  | V    |                   |                   |                   |                  |                   |                  | 10 |
| 2  | <b>199.144104</b> | 100.075690        |            |                  |                |                  | V    | <b>985.542521</b> | 493.274899        | <b>968.515972</b> | 484.761624       | 967.531956        | 484.269616       | 9  |
| 3  | <b>270.181218</b> | 135.594247        |            |                  |                |                  | A    | <b>886.474107</b> | <b>443.740692</b> | 869.447558        | 435.227417       | <b>868.463542</b> | 434.735409       | 8  |
| 4  | 327.202682        | 164.104979        |            |                  |                |                  | G    | <b>815.436993</b> | 408.222135        | 798.410444        | 399.708860       | 797.426428        | 399.216852       | 7  |
| 5  | <b>456.245275</b> | 228.626275        |            |                  | 438.234710     | 219.620993       | E    | <b>758.415529</b> | 379.711403        | 741.388980        | 371.198128       | 740.404964        | 370.706120       | 6  |
| 6  | 555.313689        | 278.160483        |            |                  | 537.303124     | 269.155200       | V    | <b>629.372936</b> | 315.190106        | 612.346387        | 306.676832       |                   |                  | 5  |
| 7  | <b>683.372267</b> | <b>342.189772</b> | 666.345718 | 333.676497       | 665.361702     | 333.184489       | Q    | <b>530.304522</b> | 265.655899        | 513.277973        | 257.142625       |                   |                  | 4  |
| 8  | <b>782.440681</b> | 391.723979        | 765.414132 | 383.210704       | 764.430116     | 382.718696       | V    | <b>402.245944</b> | 201.626610        | 385.219395        | 193.113336       |                   |                  | 3  |
| 9  | <b>910.499259</b> | <b>455.753268</b> | 893.472710 | 447.239993       | 892.488694     | 446.747985       | Q    | <b>303.177530</b> | 152.092403        | 286.150981        | 143.579129       |                   |                  | 2  |
| 10 |                   |                   |            |                  |                |                  | R    | <b>175.118952</b> | 88.063114         | 158.092403        | 79.549840        |                   |                  | 1  |



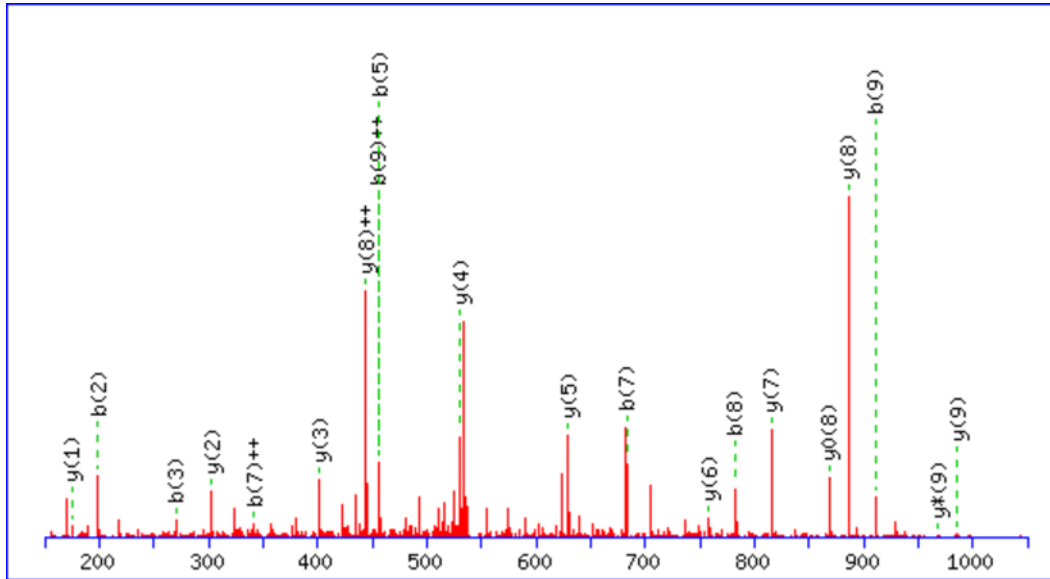

## Peptide View

### MS/MS Fragmentation of **QTSILIQK**

Found in **IPI00020687**, Tax\_Id=9606 Gene\_Symbol=SPINK1 Pancreatic secretory trypsin inhibitor

**Experiment:** 12 - S\_D-3 **Fraction:** S\_D-3

Match to Query 2766: 929.554848 from(465.784700,2+)

Title: OECHL100317\_29.8332.8332.2.dta

Data file \\Boromir\masse\Data LTQ-Orbitrap\Chrystelle Lacroix\Etude clinique sJPU\OECHL100317\_29.raw

**Monoisotopic mass of neutral peptide Mr(calc):** 929.554565 **Fixed modifications:** Carbamidomethyl (C) (apply to specified residues or termini only) **Ions Score:**

**55 Expect:** 0.00012 **Matches :** 12/72 fragment ions using 16 most intense peaks ([help](#))

| # | b                 | b <sup>++</sup> | b <sup>*</sup>    | b <sup>*++</sup> | b <sup>0</sup> | b <sup>0++</sup> | Seq. | y                 | y <sup>++</sup> | y <sup>*</sup> | y <sup>*++</sup> | y <sup>0</sup>    | y <sup>0++</sup> | # |
|---|-------------------|-----------------|-------------------|------------------|----------------|------------------|------|-------------------|-----------------|----------------|------------------|-------------------|------------------|---|
| 1 | 129.065854        | 65.036565       | 112.039305        | 56.523291        |                |                  | Q    |                   |                 |                |                  |                   |                  | 8 |
| 2 | <b>230.113533</b> | 115.560405      | 213.086984        | 107.047130       | 212.102968     | 106.555122       | T    | 802.503281        | 401.755279      | 785.476732     | 393.242004       | <b>784.492716</b> | 392.749996       | 7 |
| 3 | 317.145561        | 159.076418      | 300.119012        | 150.563144       | 299.134996     | 150.071136       | S    | <b>701.455602</b> | 351.231439      | 684.429053     | 342.718165       | 683.445037        | 342.226157       | 6 |
| 4 | 430.229625        | 215.618450      | <b>413.203076</b> | 207.105176       | 412.219060     | 206.613168       | I    | <b>614.423574</b> | 307.715425      | 597.397025     | 299.202151       |                   |                  | 5 |
| 5 | 543.313689        | 272.160483      | 526.287140        | 263.647208       | 525.303124     | 263.155200       | L    | <b>501.339510</b> | 251.173393      | 484.312961     | 242.660119       |                   |                  | 4 |

|   |            |            |            |            |            |            |   |            |            |            |            |  |  |   |
|---|------------|------------|------------|------------|------------|------------|---|------------|------------|------------|------------|--|--|---|
| 6 | 656.397753 | 328.702515 | 639.371204 | 320.189240 | 638.387188 | 319.697232 | I | 388.255446 | 194.631361 | 371.228897 | 186.118087 |  |  | 3 |
| 7 | 784.456331 | 392.731804 | 767.429782 | 384.218529 | 766.445766 | 383.726521 | Q | 275.171382 | 138.089329 | 258.144833 | 129.576055 |  |  | 2 |
| 8 |            |            |            |            |            |            | K | 147.112804 | 74.060040  | 130.086255 | 65.546765  |  |  | 1 |

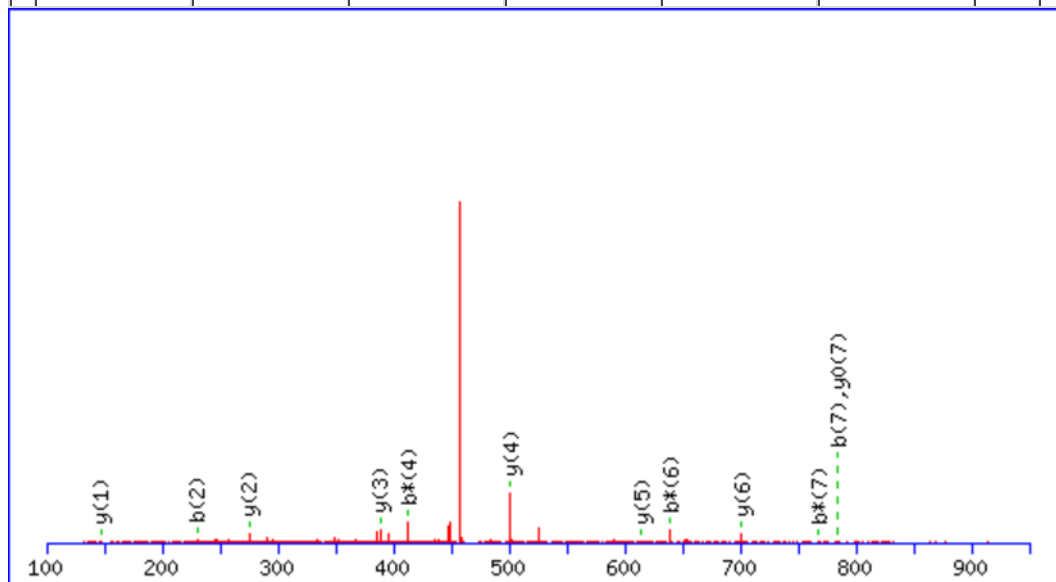

## Peptide View

MS/MS Fragmentation of **AVGLLTVISK**

Found in **IPI00013446**, Tax\_Id=9606 Gene\_Symbol=PSCA Prostate stem cell antigen

**Experiment:** 12 - S\_D-3 **Fraction:** S\_D-3

Match to Query 4067: 999.633048 from(500.823800,2+)

Title: OECHL100317\_29.17681.17681.2.dta

Data file \\Boromir\masse\Data LTQ-Orbitrap\Chrystelle Lacroix\Etude clinique sJPU\OECHL100317\_29.raw

**Monoisotopic mass of neutral peptide Mr(calc):** 999.632828 **Fixed modifications:** Carbamidomethyl (C) (apply to specified residues or termini only) **Ions Score:**

63 **Expect:** 5.3e-006 **Matches :** 15/78 fragment ions using 26 most intense peaks ([help](#))

| # | b          | b <sup>++</sup> | b <sup>0</sup> | b <sup>0++</sup> | Seq. | y          | y <sup>++</sup> | y <sup>*</sup> | y <sup>*++</sup> | y <sup>0</sup> | y <sup>0++</sup> | #  |
|---|------------|-----------------|----------------|------------------|------|------------|-----------------|----------------|------------------|----------------|------------------|----|
| 1 | 72.044390  | 36.525833       |                |                  | A    |            |                 |                |                  |                |                  | 10 |
| 2 | 171.112804 | 86.060040       |                |                  | V    | 929.602995 | 465.305136      | 912.576446     | 456.791861       | 911.592430     | 456.299853       | 9  |

|    |            |            |            |            |   |            |            |            |            |            |            |   |
|----|------------|------------|------------|------------|---|------------|------------|------------|------------|------------|------------|---|
| 3  | 228.134268 | 114.570772 |            |            | G | 830.534581 | 415.770929 | 813.508032 | 407.257654 | 812.524016 | 406.765646 | 8 |
| 4  | 341.218332 | 171.112804 |            |            | L | 773.513117 | 387.260197 | 756.486568 | 378.746922 | 755.502552 | 378.254914 | 7 |
| 5  | 454.302396 | 227.654836 |            |            | L | 660.429053 | 330.718165 | 643.402504 | 322.204890 | 642.418488 | 321.712882 | 6 |
| 6  | 555.350075 | 278.178676 | 537.339510 | 269.173393 | T | 547.344989 | 274.176133 | 530.318440 | 265.662858 | 529.334424 | 265.170850 | 5 |
| 7  | 654.418489 | 327.712883 | 636.407924 | 318.707600 | V | 446.297310 | 223.652293 | 429.270761 | 215.139018 | 428.286745 | 214.647010 | 4 |
| 8  | 767.502553 | 384.254915 | 749.491988 | 375.249632 | I | 347.228896 | 174.118086 | 330.202347 | 165.604811 | 329.218331 | 165.112803 | 3 |
| 9  | 854.534581 | 427.770929 | 836.524016 | 418.765646 | S | 234.144832 | 117.576054 | 217.118283 | 109.062779 | 216.134267 | 108.570771 | 2 |
| 10 |            |            |            |            | K | 147.112804 | 74.060040  | 130.086255 | 65.546765  |            |            | 1 |

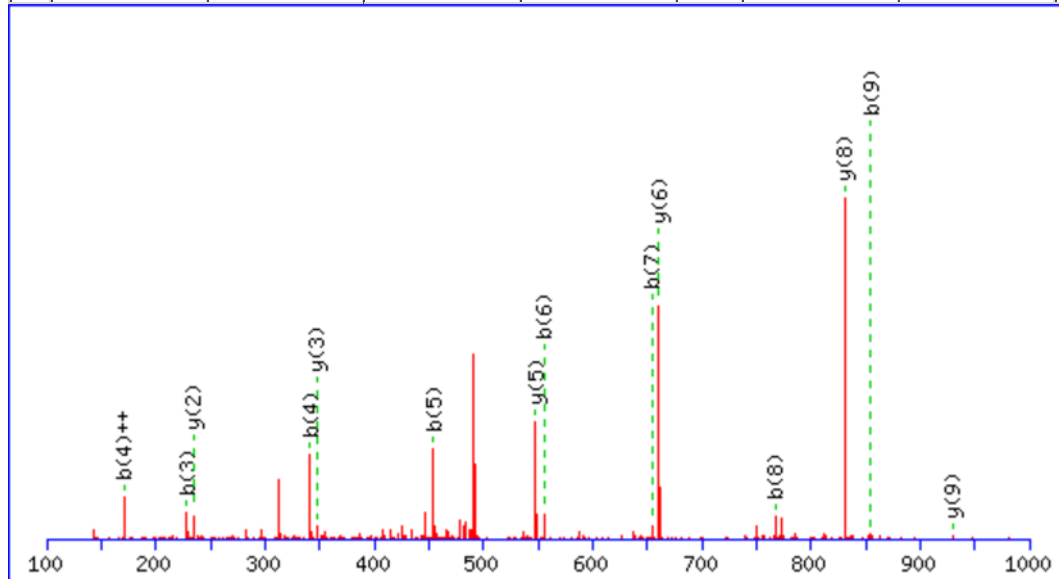

## Peptide View

MS/MS Fragmentation of **DSHLTAVGK**

Found in **IPI00031065**, Tax\_Id=9606 Gene\_Symbol=DNASE1 Deoxyribonuclease-1

**Experiment:** 12 - S\_D-3 **Fraction:** S\_D-3

Match to Query 2701: 926.482448 from(464.248500,2+)

Title: OECHL100317\_29.3209.3209.2.dta

Data file \\Boromir\masse\Data LTQ-Orbitrap\Chrystelle Lacroix\Etude clinique sJPU\OECHL100317\_29.raw

**Monoisotopic mass of neutral peptide Mr(calc):** 926.482147**Fixed modifications:** Carbamidomethyl (C) (apply to specified residues or termini only)**Ions Score:****56 Expect:** 0.0002**Matches :** 19/72 fragment ions using 31 most intense peaks ([help](#))

| # | b          | b <sup>++</sup> | b <sup>0</sup> | b <sup>0++</sup> | Seq. | y          | y <sup>++</sup> | y*         | y <sup>*++</sup> | y <sup>0</sup> | y <sup>0++</sup> | # |
|---|------------|-----------------|----------------|------------------|------|------------|-----------------|------------|------------------|----------------|------------------|---|
| 1 | 116.034219 | 58.520748       | 98.023654      | 49.515465        | D    |            |                 |            |                  |                |                  | 9 |
| 2 | 203.066247 | 102.036761      | 185.055682     | 93.031479        | S    | 812.462479 | 406.734878      | 795.435930 | 398.221603       | 794.451914     | 397.729595       | 8 |
| 3 | 340.125159 | 170.566217      | 322.114594     | 161.560935       | H    | 725.430451 | 363.218864      | 708.403902 | 354.705589       | 707.419886     | 354.213581       | 7 |
| 4 | 453.209223 | 227.108250      | 435.198658     | 218.102967       | L    | 588.371539 | 294.689408      | 571.344990 | 286.176133       | 570.360974     | 285.684125       | 6 |
| 5 | 554.256902 | 277.632089      | 536.246337     | 268.626807       | T    | 475.287475 | 238.147375      | 458.260926 | 229.634101       | 457.276910     | 229.142093       | 5 |
| 6 | 625.294016 | 313.150646      | 607.283451     | 304.145364       | A    | 374.239796 | 187.623536      | 357.213247 | 179.110261       |                |                  | 4 |
| 7 | 724.362430 | 362.684853      | 706.351865     | 353.679571       | V    | 303.202682 | 152.104979      | 286.176133 | 143.591704       |                |                  | 3 |
| 8 | 781.383894 | 391.195585      | 763.373329     | 382.190303       | G    | 204.134268 | 102.570772      | 187.107719 | 94.057498        |                |                  | 2 |
| 9 |            |                 |                |                  | K    | 147.112804 | 74.060040       | 130.086255 | 65.546765        |                |                  | 1 |

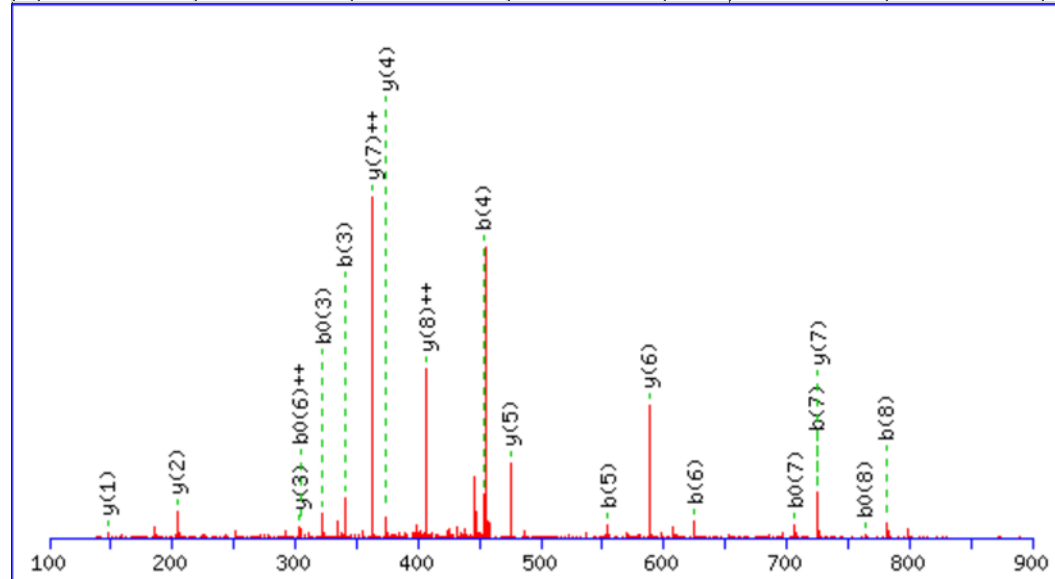

## Peptide View

MS/MS Fragmentation of **VYSTSVTGSR**Found in **IPI00010402**, Tax\_Id=9606 Gene\_Symbol=SH3BGRL3 Putative uncharacterized protein**Experiment:** 12 - S\_D-3 **Fraction:** S\_D-3

Match to Query 5145: 1055.526048 from(528.770300,2+)

Title: OECHL100317\_29.4522.4522.2.dta

Data file \\Boromir\masse\Data LTQ-Orbitrap\Chrystelle Lacroix\Etude clinique sJPU\OECHL100317\_29.raw

**Monoisotopic mass of neutral peptide Mr(calc):** 1055.524750**Fixed modifications:** Carbamidomethyl (C) (apply to specified residues or termini only)**Ions****Score:** 54 **Expect:** 0.0003**Matches :** 11/84 fragment ions using 18 most intense peaks ([help](#))

| #         | b                 | b <sup>++</sup>   | b <sup>0</sup> | b <sup>0++</sup> | Seq.     | y                 | y <sup>++</sup> | y <sup>*</sup> | y <sup>*++</sup> | y <sup>0</sup> | y <sup>0++</sup> | #         |
|-----------|-------------------|-------------------|----------------|------------------|----------|-------------------|-----------------|----------------|------------------|----------------|------------------|-----------|
| <b>1</b>  | 100.075690        | 50.541483         |                |                  | <b>V</b> |                   |                 |                |                  |                |                  | <b>10</b> |
| <b>2</b>  | <b>263.139019</b> | 132.073148        |                |                  | <b>Y</b> | <b>957.463601</b> | 479.235439      | 940.437052     | 470.722164       | 939.453036     | 470.230156       | <b>9</b>  |
| <b>3</b>  | 350.171047        | 175.589161        | 332.160482     | 166.583879       | <b>S</b> | <b>794.400272</b> | 397.703774      | 777.373723     | 389.190499       | 776.389707     | 388.698491       | <b>8</b>  |
| <b>4</b>  | 451.218726        | 226.113001        | 433.208161     | 217.107719       | <b>T</b> | <b>707.368244</b> | 354.187760      | 690.341695     | 345.674486       | 689.357679     | 345.182478       | <b>7</b>  |
| <b>5</b>  | 538.250754        | 269.629015        | 520.240189     | 260.623733       | <b>S</b> | <b>606.320565</b> | 303.663921      | 589.294016     | 295.150646       | 588.310000     | 294.658638       | <b>6</b>  |
| <b>6</b>  | <b>637.319168</b> | <b>319.163222</b> | 619.308603     | 310.157940       | <b>V</b> | <b>519.288537</b> | 260.147907      | 502.261988     | 251.634632       | 501.277972     | 251.142624       | <b>5</b>  |
| <b>7</b>  | 738.366847        | 369.687062        | 720.356282     | 360.681779       | <b>T</b> | <b>420.220123</b> | 210.613699      | 403.193574     | 202.100425       | 402.209558     | 201.608417       | <b>4</b>  |
| <b>8</b>  | <b>795.388311</b> | 398.197794        | 777.377746     | 389.192511       | <b>G</b> | <b>319.172444</b> | 160.089860      | 302.145895     | 151.576585       | 301.161879     | 151.084577       | <b>3</b>  |
| <b>9</b>  | 882.420339        | 441.713808        | 864.409774     | 432.708525       | <b>S</b> | 262.150980        | 131.579128      | 245.124431     | 123.065853       | 244.140415     | 122.573845       | <b>2</b>  |
| <b>10</b> |                   |                   |                |                  | <b>R</b> | 175.118952        | 88.063114       | 158.092403     | 79.549839        |                |                  | <b>1</b>  |

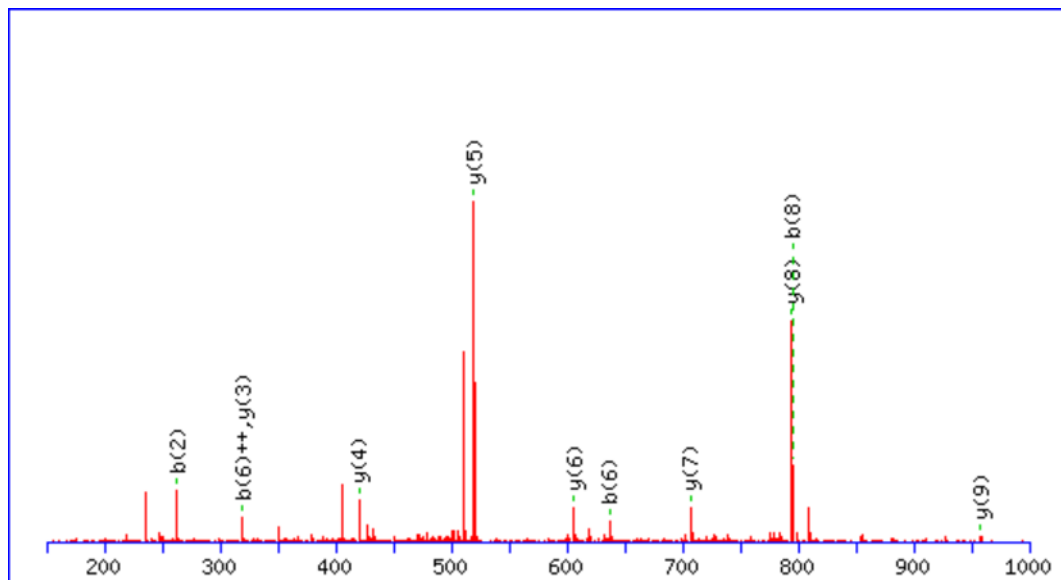

## Peptide View

MS/MS Fragmentation of **SDAAVDTSSSEITTK**

Found in **IPI00412977**, Tax\_Id=9606 Gene\_Symbol=- Prothymosin alpha

**Experiment:** 12 - S\_D-3 **Fraction:** S\_D-3

Match to Query 10983: 1465.677648 from(733.846100,2+)

Title: OECHL100317\_29.10378.10378.2.dta

Data file \\Boromir\masse\Data LTQ-Orbitrap\Chrystelle Lacroix\Etude clinique sJPU\OECHL100317\_29.raw

**Monoisotopic mass of neutral peptide Mr(calc):** 1465.678391 **Fixed modifications:** Carbamidomethyl (C) (apply to specified residues or termini only) **Variable**

**modifications:** N-term : Acetyl (N-term) **Ions Score:** 70 **Expect:** 8.1e-006 **Matches :** 20/128 fragment ions using 25 most intense peaks ([help](#))

| # | b          | b <sup>++</sup> | b <sup>0</sup> | b <sup>0++</sup> | Seq. | y           | y <sup>++</sup> | y <sup>*</sup> | y <sup>*++</sup> | y <sup>0</sup> | y <sup>0++</sup> | #  |
|---|------------|-----------------|----------------|------------------|------|-------------|-----------------|----------------|------------------|----------------|------------------|----|
| 1 | 130.049869 | 65.528572       | 112.039304     | 56.523290        | S    |             |                 |                |                  |                |                  | 14 |
| 2 | 245.076812 | 123.042044      | 227.066247     | 114.036761       | D    | 1337.643082 | 669.325179      | 1320.616533    | 660.811905       | 1319.632517    | 660.319897       | 13 |
| 3 | 316.113926 | 158.560601      | 298.103361     | 149.555319       | A    | 1222.616139 | 611.811708      | 1205.589590    | 603.298433       | 1204.605574    | 602.806425       | 12 |
| 4 | 387.151040 | 194.079158      | 369.140475     | 185.073875       | A    | 1151.579025 | 576.293151      | 1134.552476    | 567.779876       | 1133.568460    | 567.287868       | 11 |
| 5 | 486.219454 | 243.613365      | 468.208889     | 234.608082       | V    | 1080.541911 | 540.774594      | 1063.515362    | 532.261319       | 1062.531346    | 531.769311       | 10 |

|    |             |            |             |            |   |            |            |            |            |            |            |   |
|----|-------------|------------|-------------|------------|---|------------|------------|------------|------------|------------|------------|---|
| 6  | 601.246397  | 301.126837 | 583.235832  | 292.121554 | D | 981.473497 | 491.240387 | 964.446948 | 482.727112 | 963.462932 | 482.235104 | 9 |
| 7  | 702.294076  | 351.650676 | 684.283511  | 342.645394 | T | 866.446554 | 433.726915 | 849.420005 | 425.213641 | 848.435989 | 424.721633 | 8 |
| 8  | 789.326104  | 395.166690 | 771.315539  | 386.161408 | S | 765.398875 | 383.203076 | 748.372326 | 374.689801 | 747.388310 | 374.197793 | 7 |
| 9  | 876.358132  | 438.682704 | 858.347567  | 429.677421 | S | 678.366847 | 339.687062 | 661.340298 | 331.173787 | 660.356282 | 330.681779 | 6 |
| 10 | 1005.400725 | 503.204001 | 987.390160  | 494.198718 | E | 591.334819 | 296.171048 | 574.308270 | 287.657773 | 573.324254 | 287.165765 | 5 |
| 11 | 1118.484789 | 559.746033 | 1100.474224 | 550.740750 | I | 462.292226 | 231.649751 | 445.265677 | 223.136477 | 444.281661 | 222.644469 | 4 |
| 12 | 1219.532468 | 610.269872 | 1201.521903 | 601.264590 | T | 349.208162 | 175.107719 | 332.181613 | 166.594445 | 331.197597 | 166.102437 | 3 |
| 13 | 1320.580147 | 660.793712 | 1302.569582 | 651.788429 | T | 248.160483 | 124.583879 | 231.133934 | 116.070605 | 230.149918 | 115.578597 | 2 |
| 14 |             |            |             |            | K | 147.112804 | 74.060040  | 130.086255 | 65.546765  |            |            | 1 |

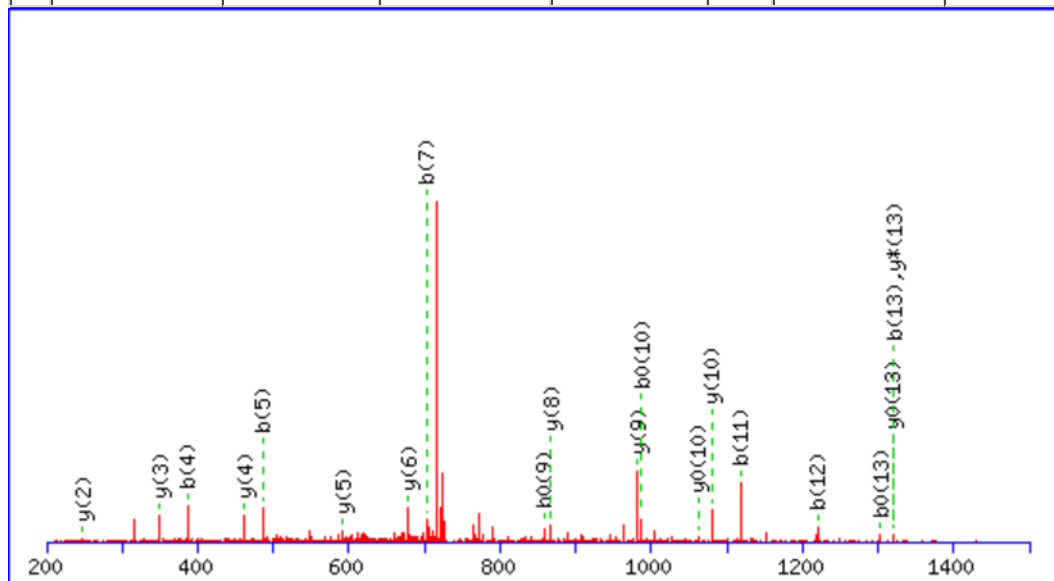

## Peptide View

MS/MS Fragmentation of **LGLLGDSVDIFK**

Found in **IPI00099670**, Tax\_Id=9606 Gene\_Symbol=CEL carboxyl ester lipase precursor

**Experiment:** 12 - S\_D-3 **Fraction:** S\_D-3

Match to Query 8692: 1275.704648 from(638.859600,2+)

Title: OECHL100317\_29.21485.21485.2.dta

Data file \\Boromir\masse\Data LTQ-Orbitrap\Chrystelle Lacroix\Etude clinique sJPU\OECHL100317\_29.raw

**Monoisotopic mass of neutral peptide Mr(calc):** 1275.707458**Fixed modifications:** Carbamidomethyl (C) (apply to specified residues or termini only)**Ions****Score:** 54 **Expect:** 0.00021**Matches :** 27/94 fragment ions using 64 most intense peaks ([help](#))

| #  | b                  | b <sup>++</sup>   | b <sup>0</sup>     | b <sup>0++</sup>  | Seq. | y                  | y <sup>++</sup>   | y*                | y* <sup>++</sup> | y <sup>0</sup>    | y <sup>0++</sup> | #  |
|----|--------------------|-------------------|--------------------|-------------------|------|--------------------|-------------------|-------------------|------------------|-------------------|------------------|----|
| 1  | 114.091340         | 57.549308         |                    |                   | L    |                    |                   |                   |                  |                   |                  | 12 |
| 2  | 171.112804         | 86.060040         |                    |                   | G    | <b>1163.630666</b> | 582.318971        | 1146.604117       | 573.805697       | 1145.620101       | 573.313689       | 11 |
| 3  | <b>284.196868</b>  | 142.602072        |                    |                   | L    | <b>1106.609202</b> | <b>553.808239</b> | 1089.582653       | 545.294964       | 1088.598637       | 544.802956       | 10 |
| 4  | <b>397.280932</b>  | 199.144104        |                    |                   | L    | <b>993.525138</b>  | 497.266207        | 976.498589        | 488.752932       | 975.514573        | 488.260924       | 9  |
| 5  | 454.302396         | <b>227.654836</b> |                    |                   | G    | <b>880.441074</b>  | 440.724175        | 863.414525        | 432.210900       | <b>862.430509</b> | 431.718892       | 8  |
| 6  | 569.329339         | <b>285.168308</b> | 551.318774         | <b>276.163025</b> | D    | <b>823.419610</b>  | 412.213443        | 806.393061        | 403.700168       | 805.409045        | 403.208160       | 7  |
| 7  | 656.361367         | 328.684322        | 638.350802         | 319.679039        | S    | <b>708.392667</b>  | 354.699972        | 691.366118        | 346.186697       | 690.382102        | 345.694689       | 6  |
| 8  | <b>755.429781</b>  | 378.218528        | <b>737.419216</b>  | <b>369.213246</b> | V    | <b>621.360639</b>  | 311.183958        | 604.334090        | 302.670683       | 603.350074        | 302.178675       | 5  |
| 9  | <b>870.456724</b>  | 435.732000        | 852.446159         | <b>426.726717</b> | D    | <b>522.292225</b>  | 261.649751        | 505.265676        | 253.136476       | 504.281660        | 252.644468       | 4  |
| 10 | <b>983.540788</b>  | 492.274032        | <b>965.530223</b>  | 483.268749        | I    | <b>407.265282</b>  | 204.136279        | 390.238733        | 195.623004       |                   |                  | 3  |
| 11 | <b>1130.609202</b> | 565.808239        | <b>1112.598637</b> | 556.802956        | F    | <b>294.181218</b>  | 147.594247        | <b>277.154669</b> | 139.080972       |                   |                  | 2  |
| 12 |                    |                   |                    |                   | K    | 147.112804         | 74.060040         | 130.086255        | 65.546765        |                   |                  | 1  |

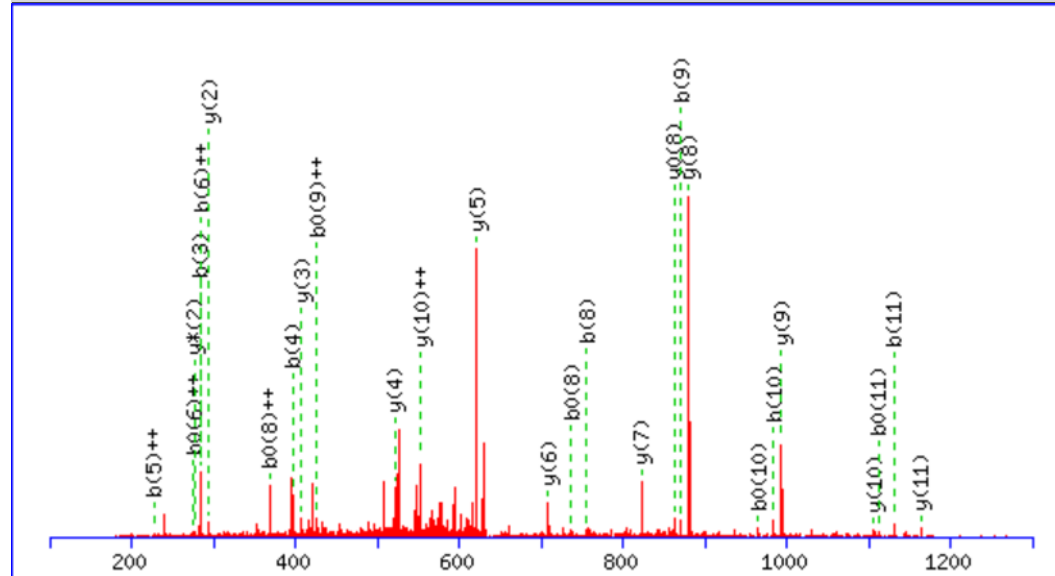



## Peptide View

MS/MS Fragmentation of **RGVSQAPTAAR**

Found in **IPI00025365**, Tax\_Id=9606 Gene\_Symbol=EDN3 Isoform Long of Endothelin-3

**Experiment:** 12 - S\_D-3 **Fraction:** S\_D-3

Match to Query 6094: 1112.605248 from(557.309900,2+)

Title: OECHL100317\_29.2352.2352.2.dta

Data file \\Boromir\masse\Data LTQ-Orbitrap\Chrystelle Lacroix\Etude clinique sJPU\OECHL100317\_29.raw

**Monoisotopic mass of neutral peptide Mr(calc):** 1112.605042 **Fixed modifications:** Carbamidomethyl (C) (apply to specified residues or termini only) **Ions**

**Score:** 50 **Expect:** 0.00087 **Matches :** 44/108 fragment ions using 82 most intense peaks ([help](#))

| #  | b                 | b <sup>++</sup>   | b*                | b* <sup>++</sup>  | b <sup>0</sup>    | b <sup>0++</sup>  | Seq. | y                 | y <sup>++</sup> | y*                | y* <sup>++</sup>  | y <sup>0</sup>    | y <sup>0++</sup> | #  |
|----|-------------------|-------------------|-------------------|-------------------|-------------------|-------------------|------|-------------------|-----------------|-------------------|-------------------|-------------------|------------------|----|
| 1  | 157.108387        | 79.057831         | 140.081838        | 70.544557         |                   |                   | R    |                   |                 |                   |                   |                   |                  | 11 |
| 2  | <b>214.129851</b> | 107.568564        | <b>197.103302</b> | 99.055289         |                   |                   | G    | <b>957.511221</b> | 479.259249      | <b>940.484672</b> | 470.745974        | <b>939.500656</b> | 470.253966       | 10 |
| 3  | <b>313.198265</b> | 157.102770        | 296.171716        | 148.589496        |                   |                   | V    | <b>900.489757</b> | 450.748517      | 883.463208        | 442.235242        | 882.479192        | 441.743234       | 9  |
| 4  | <b>400.230293</b> | 200.618785        | 383.203744        | 192.105510        | <b>382.219728</b> | 191.613502        | S    | <b>801.421343</b> | 401.214310      | 784.394794        | 392.701035        | <b>783.410778</b> | 392.209027       | 8  |
| 5  | <b>528.288871</b> | 264.648074        | 511.262322        | 256.134799        | 510.278306        | 255.642791        | Q    | <b>714.389315</b> | 357.698296      | <b>697.362766</b> | 349.185021        | <b>696.378750</b> | 348.693013       | 7  |
| 6  | <b>599.325985</b> | <b>300.166631</b> | <b>582.299436</b> | 291.653356        | 581.315420        | 291.161348        | A    | <b>586.330737</b> | 293.669007      | 569.304188        | <b>285.155732</b> | <b>568.320172</b> | 284.663724       | 6  |
| 7  | <b>696.378749</b> | 348.693013        | 679.352200        | <b>340.179738</b> | 678.368184        | 339.687730        | P    | <b>515.293623</b> | 258.150450      | <b>498.267074</b> | 249.637175        | 497.283058        | 249.145167       | 5  |
| 8  | <b>797.426428</b> | <b>399.216852</b> | <b>780.399879</b> | <b>390.703578</b> | <b>779.415863</b> | <b>390.211570</b> | T    | 418.240859        | 209.624068      | 401.214310        | 201.110793        | <b>400.230294</b> | 200.618785       | 4  |
| 9  | <b>868.463542</b> | <b>434.735409</b> | <b>851.436993</b> | <b>426.222135</b> | 850.452977        | <b>425.730127</b> | A    | <b>317.193180</b> | 159.100228      | <b>300.166631</b> | 150.586953        |                   |                  | 3  |
| 10 | <b>939.500656</b> | 470.253966        | <b>922.474107</b> | 461.740692        | 921.490091        | 461.248684        | A    | 246.156066        | 123.581671      | <b>229.129517</b> | 115.068397        |                   |                  | 2  |
| 11 |                   |                   |                   |                   |                   |                   | R    | <b>175.118952</b> | 88.063114       | <b>158.092403</b> | 79.549840         |                   |                  | 1  |

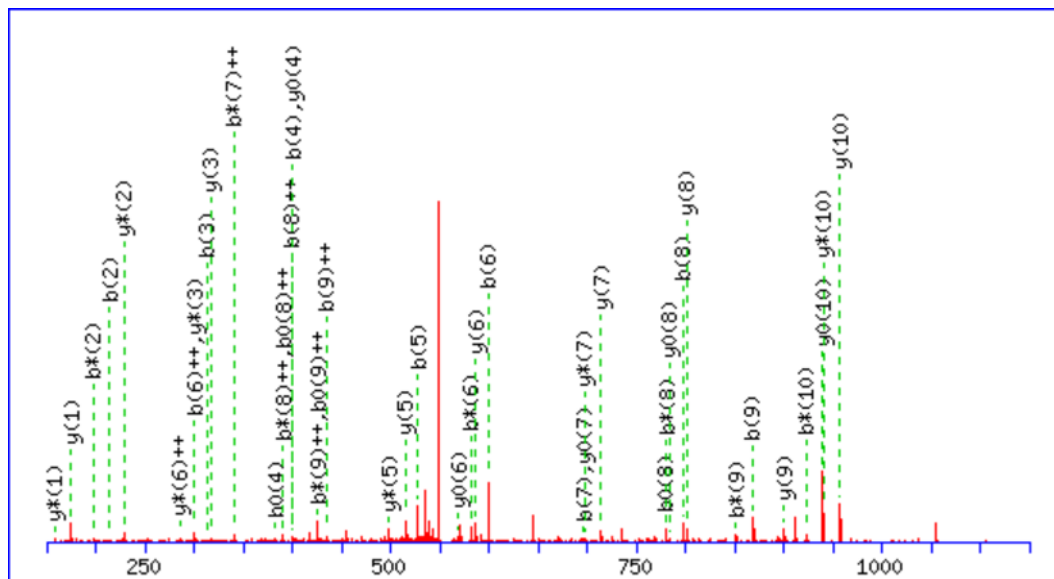

## Peptide View

MS/MS Fragmentation of **GNFN**YIEFTR

Found in **IPI00033494**, Tax\_Id=9606 Gene\_Symbol=MYL12B Myosin regulatory light chain 12B

**Experiment:** 51 - PyB-3 **Fraction:** PyB-3

Match to Query 7184: 1259.594048 from(630.804300,2+)

Title: OECHL100317\_27.15741.15741.2.dta

Data file \\Boromir\masse\Data LTQ-Orbitrap\Chrystelle Lacroix\Etude clinique sJPU\OECHL100317\_27.raw

**Monoisotopic mass of neutral peptide Mr(calc):** 1259.593475 **Fixed modifications:** Carbamidomethyl (C) (apply to specified residues or termini only) **Ions**

**Score:** 53 **Expect:** 0.00063 **Matches :** 10/92 fragment ions using 11 most intense peaks ([help](#))

| # | b                 | b <sup>++</sup> | b <sup>*</sup> | b <sup>*++</sup> | b <sup>0</sup> | b <sup>0++</sup> | Seq. | y                  | y <sup>++</sup> | y <sup>*</sup> | y <sup>*++</sup> | y <sup>0</sup> | y <sup>0++</sup> |
|---|-------------------|-----------------|----------------|------------------|----------------|------------------|------|--------------------|-----------------|----------------|------------------|----------------|------------------|
| 1 | 58.028740         | 29.518008       |                |                  |                |                  | G    |                    |                 |                |                  |                |                  |
| 2 | 172.071667        | 86.539471       | 155.045118     | 78.026197        |                |                  | N    | 1203.579299        | 602.293288      | 1186.552750    | 593.780013       | 1185.568734    | 593.2880         |
| 3 | <b>319.140081</b> | 160.073678      | 302.113532     | 151.560404       |                |                  | F    | <b>1089.536372</b> | 545.271824      | 1072.509823    | 536.758549       | 1071.525807    | 536.2665         |
| 4 | 433.183008        | 217.095142      | 416.156459     | 208.581867       |                |                  | N    | <b>942.467958</b>  | 471.737617      | 925.441409     | 463.224342       | 924.457393     | 462.7323         |
| 5 | 596.246337        | 298.626807      | 579.219788     | 290.113532       |                |                  | Y    | <b>828.425031</b>  | 414.716154      | 811.398482     | 406.202879       | 810.414466     | 405.7108         |

|    |             |            |             |            |             |            |   |            |            |            |            |            |          |
|----|-------------|------------|-------------|------------|-------------|------------|---|------------|------------|------------|------------|------------|----------|
| 6  | 709.330401  | 355.168839 | 692.303852  | 346.655564 |             |            | I | 665.361702 | 333.184489 | 648.335153 | 324.671214 | 647.351137 | 324.1792 |
| 7  | 838.372994  | 419.690135 | 821.346445  | 411.176861 | 820.362429  | 410.684853 | E | 552.277638 | 276.642457 | 535.251089 | 268.129182 | 534.267073 | 267.6371 |
| 8  | 985.441408  | 493.224342 | 968.414859  | 484.711068 | 967.430843  | 484.219060 | F | 423.235045 | 212.121160 | 406.208496 | 203.607886 | 405.224480 | 203.1158 |
| 9  | 1086.489087 | 543.748181 | 1069.462538 | 535.234907 | 1068.478522 | 534.742899 | T | 276.166631 | 138.586953 | 259.140082 | 130.073679 | 258.156066 | 129.5816 |
| 10 |             |            |             |            |             |            | R | 175.118952 | 88.063114  | 158.092403 | 79.549839  |            |          |

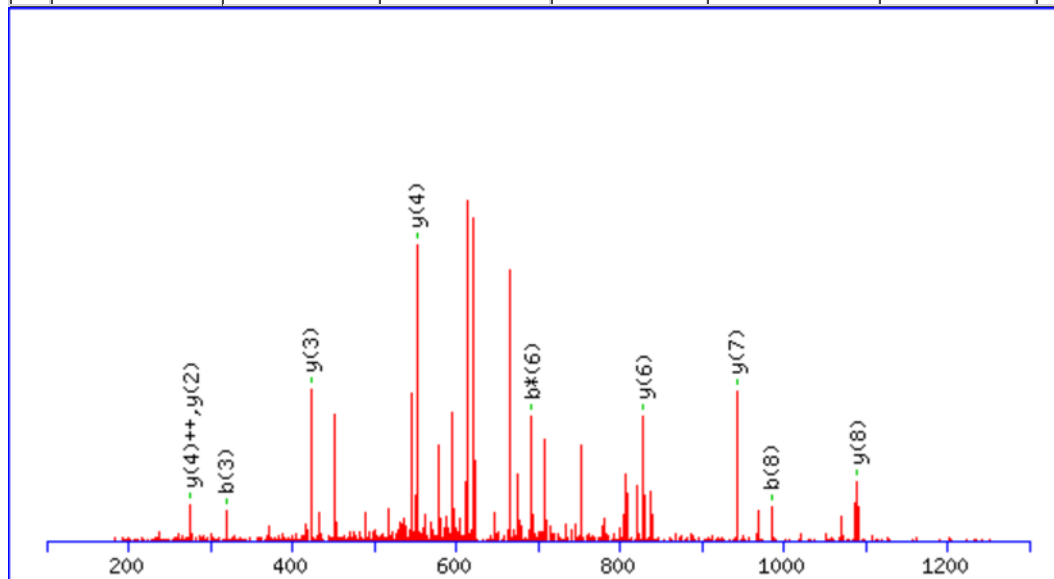

## Peptide View

MS/MS Fragmentation of **VVEQMCITQYER**

Found in **IPI00022284**, Tax\_Id=9606 Gene\_Symbol=PRNP Major prion protein

Experiment: 51 - PyB-3 Fraction: PyB-3

Match to Query 10333: 1554.717848 from(778.366200,2+)

Title: OECHL100317\_27.13015.13015.2.dta

Data file \\Boromir\masse\Data LTQ-Orbitrap\Chrystelle Lacroix\Etude clinique sJPU\OECHL100317\_27.raw

**Monoisotopic mass of neutral peptide Mr(calc):** 1554.717041 **Fixed modifications:** Carbamidomethyl (C) (apply to specified residues or termini only) **Ions**

**Score:** 74 **Expect:** 3.6e-006 **Matches :** 16/120 fragment ions using 26 most intense peaks ([help](#))

| # | b | b <sup>++</sup> | b* | b <sup>*++</sup> | b <sup>0</sup> | b <sup>0++</sup> | Seq. | y | y <sup>++</sup> | y* | y <sup>*++</sup> | y <sup>0</sup> | y <sup>0++</sup> |
|---|---|-----------------|----|------------------|----------------|------------------|------|---|-----------------|----|------------------|----------------|------------------|
|---|---|-----------------|----|------------------|----------------|------------------|------|---|-----------------|----|------------------|----------------|------------------|

|    |                    |            |             |            |             |            |   |                    |                   |                   |            |             |          |  |
|----|--------------------|------------|-------------|------------|-------------|------------|---|--------------------|-------------------|-------------------|------------|-------------|----------|--|
| 1  | 100.075690         | 50.541483  |             |            |             |            | V |                    |                   |                   |            |             |          |  |
| 2  | 199.144104         | 100.075690 |             |            |             |            | V | <b>1456.655914</b> | 728.831595        | 1439.629365       | 720.318321 | 1438.645349 | 719.8263 |  |
| 3  | 328.186697         | 164.596987 |             |            | 310.176132  | 155.591704 | E | <b>1357.587500</b> | <b>679.297388</b> | 1340.560951       | 670.784114 | 1339.576935 | 670.2921 |  |
| 4  | 456.245275         | 228.626276 | 439.218726  | 220.113001 | 438.234710  | 219.620993 | Q | <b>1228.544907</b> | 614.776092        | 1211.518358       | 606.262817 | 1210.534342 | 605.7708 |  |
| 5  | <b>587.285760</b>  | 294.146518 | 570.259211  | 285.633244 | 569.275195  | 285.141236 | M | <b>1100.486329</b> | 550.746803        | 1083.459780       | 542.233528 | 1082.475764 | 541.7415 |  |
| 6  | 747.316409         | 374.161843 | 730.289860  | 365.648568 | 729.305844  | 365.156560 | C | <b>969.445844</b>  | 485.226560        | 952.419295        | 476.713286 | 951.435279  | 476.2212 |  |
| 7  | <b>860.400473</b>  | 430.703875 | 843.373924  | 422.190600 | 842.389908  | 421.698592 | I | <b>809.415195</b>  | 405.211236        | 792.388646        | 396.697961 | 791.404630  | 396.2059 |  |
| 8  | 961.448152         | 481.227714 | 944.421603  | 472.714440 | 943.437587  | 472.222432 | T | <b>696.331131</b>  | 348.669204        | <b>679.304582</b> | 340.155929 | 678.320566  | 339.6639 |  |
| 9  | <b>1089.506730</b> | 545.257003 | 1072.480181 | 536.743729 | 1071.496165 | 536.251721 | Q | <b>595.283452</b>  | 298.145364        | 578.256903        | 289.632090 | 577.272887  | 289.1400 |  |
| 10 | 1252.570059        | 626.788668 | 1235.543510 | 618.275393 | 1234.559494 | 617.783385 | Y | <b>467.224874</b>  | 234.116075        | 450.198325        | 225.602801 | 449.214309  | 225.1107 |  |
| 11 | <b>1381.612652</b> | 691.309964 | 1364.586103 | 682.796690 | 1363.602087 | 682.304682 | E | <b>304.161545</b>  | 152.584411        | 287.134996        | 144.071136 | 286.150980  | 143.5791 |  |
| 12 |                    |            |             |            |             |            | R | 175.118952         | 88.063114         | 158.092403        | 79.549839  |             |          |  |

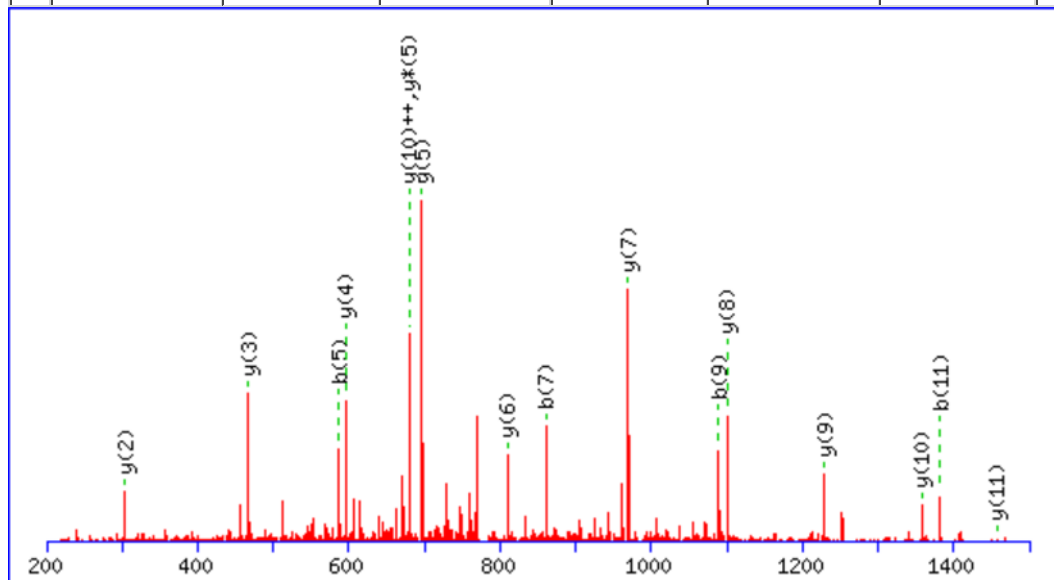

## Peptide View

MS/MS Fragmentation of **EVQLVESGGGLVKPGGSLR**

Found in **IPI00783024**, Tax\_Id=9606 Gene\_Symbol=- Myosin-reactive immunoglobulin heavy chain variable region (Fragment)

**Experiment:** 51 - PyB-3 **Fraction:** PyB-3

Match to Query 12862: 1881.033448 from(941.524000,2+)

Title: OECHL100317\_27.13579.13579.2.dta

Data file \\Boromir\masse\Data LTQ-Orbitrap\Chrystelle Lacroix\Etude clinique sJPU\OECHL100317\_27.raw

**Monoisotopic mass of neutral peptide Mr(calc):** 1881.031982**Fixed modifications:** Carbamidomethyl (C) (apply to specified residues or termini only)**Ions**

**Score:** 71 **Expect:** 4.5e-006**Matches :** 24/208 fragment ions using 30 most intense peaks ([help](#))

| #  | b                  | b <sup>++</sup> | b*          | b* <sup>++</sup>  | b <sup>0</sup>    | b <sup>0++</sup> | Seq. | y                  | y <sup>++</sup>   | y*                | y* <sup>++</sup> | y <sup>0</sup>    | y <sup>0++</sup> |
|----|--------------------|-----------------|-------------|-------------------|-------------------|------------------|------|--------------------|-------------------|-------------------|------------------|-------------------|------------------|
| 1  | 130.049869         | 65.528572       |             |                   | 112.039304        | 56.523290        | E    |                    |                   |                   |                  |                   |                  |
| 2  | 229.118283         | 115.062780      |             |                   | 211.107718        | 106.057497       | V    | 1752.996660        | 877.001968        | 1735.970111       | 868.488694       | 1734.986095       | 867.9966         |
| 3  | <b>357.176861</b>  | 179.092069      | 340.150312  | 170.578794        | <b>339.166296</b> | 170.086786       | Q    | <b>1653.928246</b> | <b>827.467761</b> | 1636.901697       | 818.954487       | 1635.917681       | 818.4624         |
| 4  | <b>470.260925</b>  | 235.634101      | 453.234376  | 227.120826        | <b>452.250360</b> | 226.628818       | L    | <b>1525.869668</b> | <b>763.438472</b> | 1508.843119       | 754.925198       | 1507.859103       | 754.4331         |
| 5  | <b>569.329339</b>  | 285.168308      | 552.302790  | 276.655033        | 551.318774        | 276.163025       | V    | <b>1412.785604</b> | 706.896440        | 1395.759055       | 698.383166       | 1394.775039       | 697.8911         |
| 6  | 698.371932         | 349.689604      | 681.345383  | 341.176330        | 680.361367        | 340.684322       | E    | <b>1313.717190</b> | 657.362233        | 1296.690641       | 648.848959       | 1295.706625       | 648.3569         |
| 7  | 785.403960         | 393.205618      | 768.377411  | 384.692344        | 767.393395        | 384.200336       | S    | <b>1184.674597</b> | 592.840937        | 1167.648048       | 584.327662       | 1166.664032       | 583.8356         |
| 8  | 842.425424         | 421.716350      | 825.398875  | 413.203076        | 824.414859        | 412.711068       | G    | <b>1097.642569</b> | 549.324923        | 1080.616020       | 540.811648       | 1079.632004       | 540.3196         |
| 9  | 899.446888         | 450.227082      | 882.420339  | 441.713808        | 881.436323        | 441.221800       | G    | <b>1040.621105</b> | 520.814191        | 1023.594556       | 512.300916       | 1022.610540       | 511.8089         |
| 10 | 956.468352         | 478.737814      | 939.441803  | <b>470.224540</b> | 938.457787        | 469.732532       | G    | 983.599641         | 492.303459        | 966.573092        | 483.790184       | 965.589076        | 483.2981         |
| 11 | <b>1069.552416</b> | 535.279846      | 1052.525867 | 526.766572        | 1051.541851       | 526.274564       | L    | 926.578177         | 463.792727        | 909.551628        | 455.279452       | 908.567612        | 454.7874         |
| 12 | 1168.620830        | 584.814053      | 1151.594281 | 576.300779        | 1150.610265       | 575.808771       | V    | <b>813.494113</b>  | 407.250695        | 796.467564        | 398.737420       | 795.483548        | 398.2454         |
| 13 | 1296.715793        | 648.861535      | 1279.689244 | 640.348260        | 1278.705228       | 639.856252       | K    | <b>714.425699</b>  | <b>357.716487</b> | 697.399150        | 349.203213       | 696.415134        | 348.7112         |
| 14 | 1393.768557        | 697.387917      | 1376.742008 | 688.874642        | 1375.757992       | 688.382634       | P    | <b>586.330736</b>  | 293.669006        | <b>569.304187</b> | 285.155731       | <b>568.320171</b> | 284.6637         |
| 15 | 1450.790021        | 725.898649      | 1433.763472 | 717.385374        | 1432.779456       | 716.893366       | G    | 489.277972         | 245.142624        | 472.251423        | 236.629349       | 471.267407        | 236.1373         |
| 16 | 1507.811485        | 754.409381      | 1490.784936 | 745.896106        | 1489.800920       | 745.404098       | G    | 432.256508         | 216.631892        | 415.229959        | 208.118617       | 414.245943        | 207.6266         |
| 17 | 1594.843513        | 797.925395      | 1577.816964 | 789.412120        | 1576.832948       | 788.920112       | S    | 375.235044         | 188.121160        | 358.208495        | 179.607885       | <b>357.224479</b> | 179.1158         |
| 18 | <b>1707.927577</b> | 854.467427      | 1690.901028 | 845.954152        | 1689.917012       | 845.462144       | L    | 288.203016         | 144.605146        | 271.176467        | 136.091871       |                   |                  |
| 19 |                    |                 |             |                   |                   |                  | R    | 175.118952         | 88.063114         | 158.092403        | 79.549839        |                   |                  |

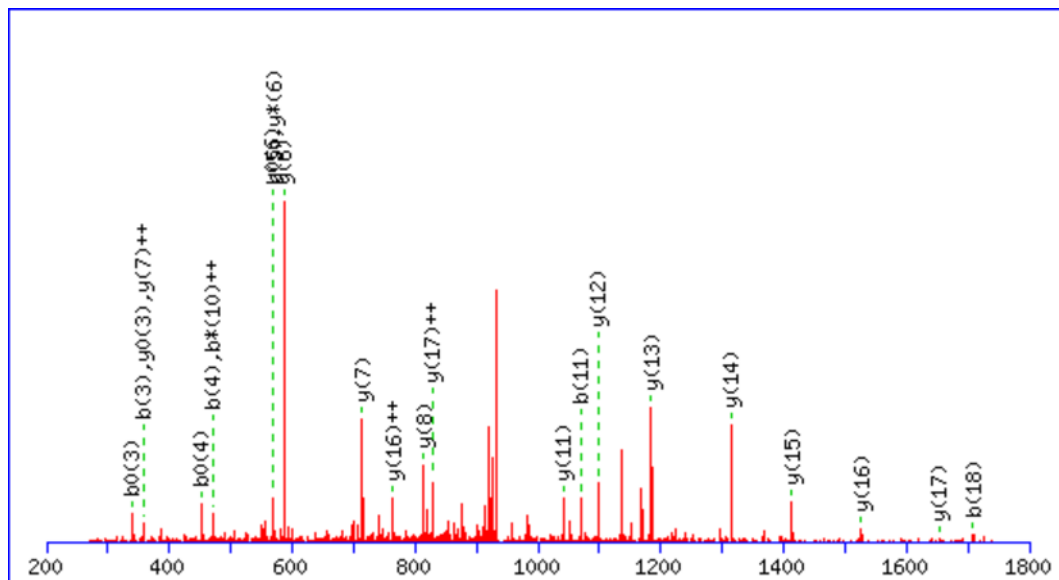

## Peptide View

MS/MS Fragmentation of **CQCPAGAALQADGR**

Found in **IPI00010737**, Tax\_Id=9606 Gene\_Symbol=THBD Thrombomodulin

**Experiment:** 51 - PyB-3 **Fraction:** PyB-3

Match to Query 9234: 1473.645048 from(737.829800,2+)

Title: OECHL100317\_27.7924.7924.2.dta

Data file \\Boromir\masse\Data LTQ-Orbitrap\Chrystelle Lacroix\Etude clinique sJPU\OECHL100317\_27.raw

**Monoisotopic mass of neutral peptide Mr(calc):** 1473.645279 **Fixed modifications:** Carbamidomethyl (C) (apply to specified residues or termini only) **Ions**

**Score:** 63 **Expect:** 2.3e-005 **Matches :** 21/128 fragment ions using 39 most intense peaks ([help](#))

| # | b                 | b <sup>++</sup> | b*                | b <sup>*++</sup> | b <sup>0</sup> | b <sup>0++</sup> | Seq. | y                  | y <sup>++</sup>   | y*          | y <sup>*++</sup> | y <sup>0</sup> | y <sup>0++</sup> |
|---|-------------------|-----------------|-------------------|------------------|----------------|------------------|------|--------------------|-------------------|-------------|------------------|----------------|------------------|
| 1 | 161.037925        | 81.022600       |                   |                  |                |                  | C    |                    |                   |             |                  |                |                  |
| 2 | <b>289.096503</b> | 145.051890      | 272.069954        | 136.538615       |                |                  | Q    | 1314.621912        | 657.814594        | 1297.595363 | 649.301320       | 1296.611347    | 648.8093         |
| 3 | <b>449.127152</b> | 225.067214      | <b>432.100603</b> | 216.553940       |                |                  | C    | <b>1186.563334</b> | <b>593.785305</b> | 1169.536785 | 585.272031       | 1168.552769    | 584.7800         |
| 4 | <b>546.179916</b> | 273.593596      | 529.153367        | 265.080322       |                |                  | P    | <b>1026.532685</b> | 513.769981        | 1009.506136 | 505.256706       | 1008.522120    | 504.7646         |
| 5 | <b>617.217030</b> | 309.112153      | 600.190481        | 300.598879       |                |                  | A    | <b>929.479921</b>  | 465.243599        | 912.453372  | 456.730324       | 911.469356     | 456.2383         |

|    |             |            |             |            |             |            |   |            |            |            |            |            |          |
|----|-------------|------------|-------------|------------|-------------|------------|---|------------|------------|------------|------------|------------|----------|
| 6  | 674.238494  | 337.622885 | 657.211945  | 329.109611 |             |            | G | 858.442807 | 429.725042 | 841.416258 | 421.211767 | 840.432242 | 420.7197 |
| 7  | 745.275608  | 373.141442 | 728.249059  | 364.628168 |             |            | A | 801.421343 | 401.214310 | 784.394794 | 392.701035 | 783.410778 | 392.2090 |
| 8  | 816.312722  | 408.659999 | 799.286173  | 400.146725 |             |            | A | 730.384229 | 365.695753 | 713.357680 | 357.182478 | 712.373664 | 356.6904 |
| 9  | 929.396786  | 465.202031 | 912.370237  | 456.688757 |             |            | L | 659.347115 | 330.177196 | 642.320566 | 321.663921 | 641.336550 | 321.1719 |
| 10 | 1057.455364 | 529.231320 | 1040.428815 | 520.718046 |             |            | Q | 546.263051 | 273.635164 | 529.236502 | 265.121889 | 528.252486 | 264.6298 |
| 11 | 1128.492478 | 564.749877 | 1111.465929 | 556.236603 |             |            | A | 418.204473 | 209.605874 | 401.177924 | 201.092600 | 400.193908 | 200.6005 |
| 12 | 1243.519421 | 622.263349 | 1226.492872 | 613.750074 | 1225.508856 | 613.258066 | D | 347.167359 | 174.087317 | 330.140810 | 165.574043 | 329.156794 | 165.0820 |
| 13 | 1300.540885 | 650.774081 | 1283.514336 | 642.260806 | 1282.530320 | 641.768798 | G | 232.140416 | 116.573846 | 215.113867 | 108.060571 |            |          |
| 14 |             |            |             |            |             |            | R | 175.118952 | 88.063114  | 158.092403 | 79.549839  |            |          |

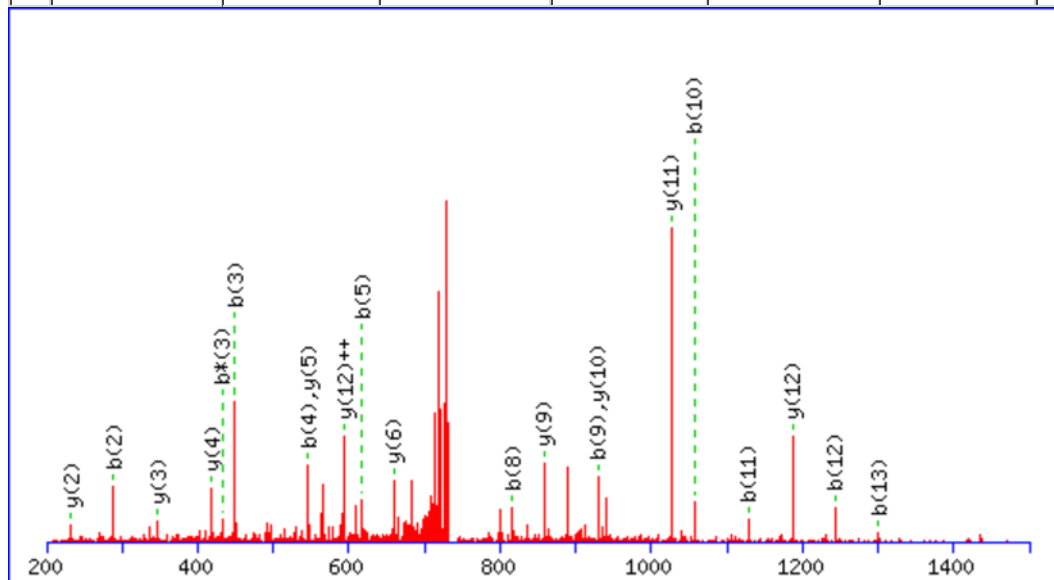

## Peptide View

MS/MS Fragmentation of **ITCAEEGWSPTPK**

Found in **IPI00006154**, Tax\_Id=9606 Gene\_Symbol=CFHR2 Isoform Long of Complement factor H-related protein 2

Experiment: 51 - PyB-3 Fraction: PyB-3

Match to Query 9249: 1474.677648 from(738.346100,2+)

Title: OECHL100317\_27.10318.10318.2.dta

Data file \\Boromir\masse\Data LTQ-Orbitrap\Chrystelle Lacroix\Etude clinique sJPU\OECHL100317\_27.raw

**Monoisotopic mass of neutral peptide Mr(calc):** 1474.676224**Fixed modifications:** Carbamidomethyl (C) (apply to specified residues or termini only)**Ions****Score:** 77 **Expect:** 2.3e-006**Matches :** 30/114 fragment ions using 49 most intense peaks ([help](#))

| #  | b                  | b <sup>++</sup> | b <sup>0</sup>     | b <sup>0++</sup> | Seq. | y                  | y <sup>++</sup>   | y*          | y* <sup>++</sup>  | y <sup>0</sup>    | y <sup>0++</sup>  | #  |
|----|--------------------|-----------------|--------------------|------------------|------|--------------------|-------------------|-------------|-------------------|-------------------|-------------------|----|
| 1  | 114.091340         | 57.549308       |                    |                  | I    |                    |                   |             |                   |                   |                   | 13 |
| 2  | 215.139019         | 108.073147      | 197.128454         | 99.067865        | T    | <b>1362.599444</b> | <b>681.803360</b> | 1345.572895 | 673.290086        | 1344.588879       | 672.798078        | 12 |
| 3  | <b>375.169668</b>  | 188.088472      | <b>357.159103</b>  | 179.083190       | C    | <b>1261.551765</b> | <b>631.279521</b> | 1244.525216 | 622.766246        | 1243.541200       | 622.274238        | 11 |
| 4  | <b>446.206782</b>  | 223.607029      | 428.196217         | 214.601747       | A    | <b>1101.521116</b> | 551.264196        | 1084.494567 | 542.750922        | 1083.510551       | 542.258914        | 10 |
| 5  | <b>575.249375</b>  | 288.128326      | 557.238810         | 279.123043       | E    | <b>1030.484002</b> | 515.745639        | 1013.457453 | 507.232365        | 1012.473437       | 506.740357        | 9  |
| 6  | <b>704.291968</b>  | 352.649622      | <b>686.281403</b>  | 343.644340       | E    | <b>901.441409</b>  | 451.224343        | 884.414860  | <b>442.711068</b> | 883.430844        | <b>442.219060</b> | 8  |
| 7  | 761.313432         | 381.160354      | 743.302867         | 372.155072       | G    | <b>772.398816</b>  | 386.703046        | 755.372267  | 378.189772        | 754.388251        | 377.697764        | 7  |
| 8  | <b>947.392745</b>  | 474.200011      | <b>929.382180</b>  | 465.194728       | W    | <b>715.377352</b>  | 358.192314        | 698.350803  | 349.679040        | 697.366787        | 349.187032        | 6  |
| 9  | <b>1034.424773</b> | 517.716025      | <b>1016.414208</b> | 508.710742       | S    | <b>529.298039</b>  | 265.152658        | 512.271490  | 256.639383        | 511.287474        | 256.147375        | 5  |
| 10 | <b>1131.477537</b> | 566.242407      | 1113.466972        | 557.237124       | P    | <b>442.266011</b>  | 221.636644        | 425.239462  | 213.123369        | <b>424.255446</b> | 212.631361        | 4  |
| 11 | <b>1232.525216</b> | 616.766246      | 1214.514651        | 607.760964       | T    | <b>345.213247</b>  | 173.110262        | 328.186698  | 164.596987        | 327.202682        | 164.104979        | 3  |
| 12 | <b>1329.577980</b> | 665.292628      | <b>1311.567415</b> | 656.287346       | P    | <b>244.165568</b>  | 122.586422        | 227.139019  | 114.073148        |                   |                   | 2  |
| 13 |                    |                 |                    |                  | K    | 147.112804         | 74.060040         | 130.086255  | 65.546765         |                   |                   | 1  |

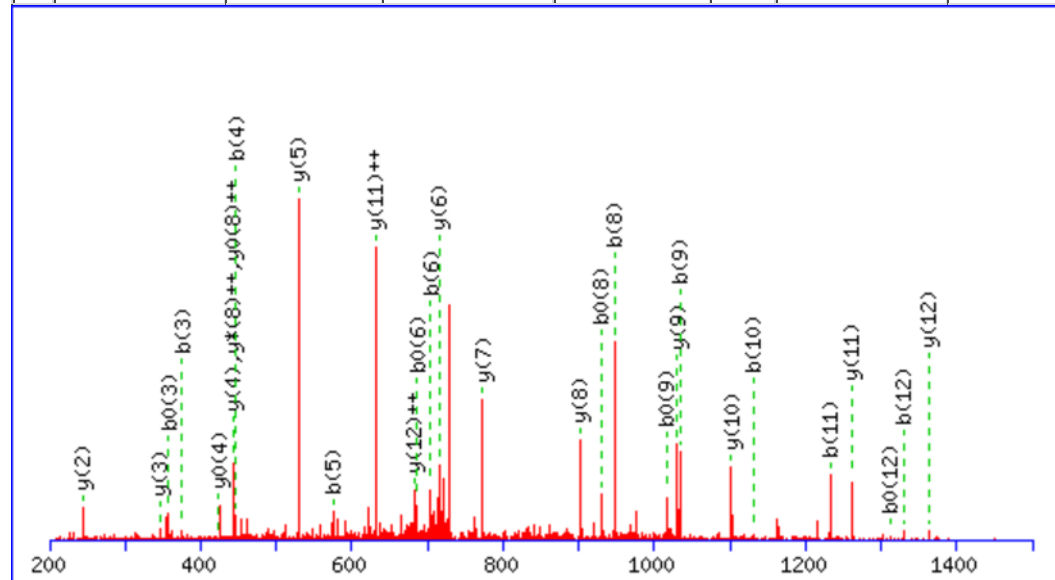



## Peptide View

MS/MS Fragmentation of **QGGFLGLSNIK**

Found in **IPI00013955**, Tax\_Id=9606 Gene\_Symbol=MUC1 Isoform 1 of Mucin-1

Experiment: 51 - PyB-3 Fraction: PyB-3

Match to Query 5243: 1132.624448 from(567.319500,2+)

Title: OECHL100317\_27.16278.16278.2.dta

Data file \\Boromir\masse\Data LTQ-Orbitrap\Chrystelle Lacroix\Etude clinique sJPU\OECHL100317\_27.raw

**Monoisotopic mass of neutral peptide Mr(calc):** 1132.624054**Fixed modifications:** Carbamidomethyl (C) (apply to specified residues or termini only)**Ions**

**Score:** 55 **Expect:** 0.0002**Matches :** 26/100 fragment ions using 56 most intense peaks ([help](#))

| #  | b                 | b <sup>++</sup> | b*                | b* <sup>++</sup>  | b <sup>0</sup>    | b <sup>0++</sup> | Seq. | y                  | y <sup>++</sup>   | y*                | y* <sup>++</sup> | y <sup>0</sup> | y <sup>0++</sup> | #  |
|----|-------------------|-----------------|-------------------|-------------------|-------------------|------------------|------|--------------------|-------------------|-------------------|------------------|----------------|------------------|----|
| 1  | 129.065854        | 65.036565       | 112.039305        | 56.523291         |                   |                  | Q    |                    |                   |                   |                  |                |                  | 11 |
| 2  | <b>186.087318</b> | 93.547297       | 169.060769        | 85.034023         |                   |                  | G    | <b>1005.572757</b> | 503.290017        | <b>988.546208</b> | 494.776742       | 987.562192     | 494.284734       | 10 |
| 3  | <b>243.108782</b> | 122.058029      | 226.082233        | 113.544755        |                   |                  | G    | <b>948.551293</b>  | 474.779285        | 931.524744        | 466.266010       | 930.540728     | 465.774002       | 9  |
| 4  | 390.177196        | 195.592236      | <b>373.150647</b> | 187.078962        |                   |                  | F    | <b>891.529829</b>  | 446.268553        | 874.503280        | 437.755278       | 873.519264     | 437.263270       | 8  |
| 5  | 503.261260        | 252.134268      | <b>486.234711</b> | <b>243.620994</b> |                   |                  | L    | <b>744.461415</b>  | <b>372.734346</b> | 727.434866        | 364.221071       | 726.450850     | 363.729063       | 7  |
| 6  | 560.282724        | 280.645000      | <b>543.256175</b> | 272.131726        |                   |                  | G    | <b>631.377351</b>  | 316.192314        | <b>614.350802</b> | 307.679039       | 613.366786     | 307.187031       | 6  |
| 7  | <b>673.366788</b> | 337.187032      | <b>656.340239</b> | 328.673758        |                   |                  | L    | <b>574.355887</b>  | 287.681582        | 557.329338        | 279.168307       | 556.345322     | 278.676299       | 5  |
| 8  | 760.398816        | 380.703046      | <b>743.372267</b> | 372.189772        | 742.388251        | 371.697764       | S    | <b>461.271823</b>  | 231.139550        | 444.245274        | 222.626275       | 443.261258     | 222.134267       | 4  |
| 9  | 874.441743        | 437.724510      | <b>857.415194</b> | 429.211235        | <b>856.431178</b> | 428.719227       | N    | <b>374.239795</b>  | 187.623536        | 357.213246        | 179.110261       |                |                  | 3  |
| 10 | 987.525807        | 494.266542      | <b>970.499258</b> | 485.753267        | <b>969.515242</b> | 485.261259       | I    | <b>260.196868</b>  | 130.602072        | <b>243.170319</b> | 122.088798       |                |                  | 2  |
| 11 |                   |                 |                   |                   |                   |                  | K    | 147.112804         | 74.060040         | 130.086255        | 65.546766        |                |                  | 1  |

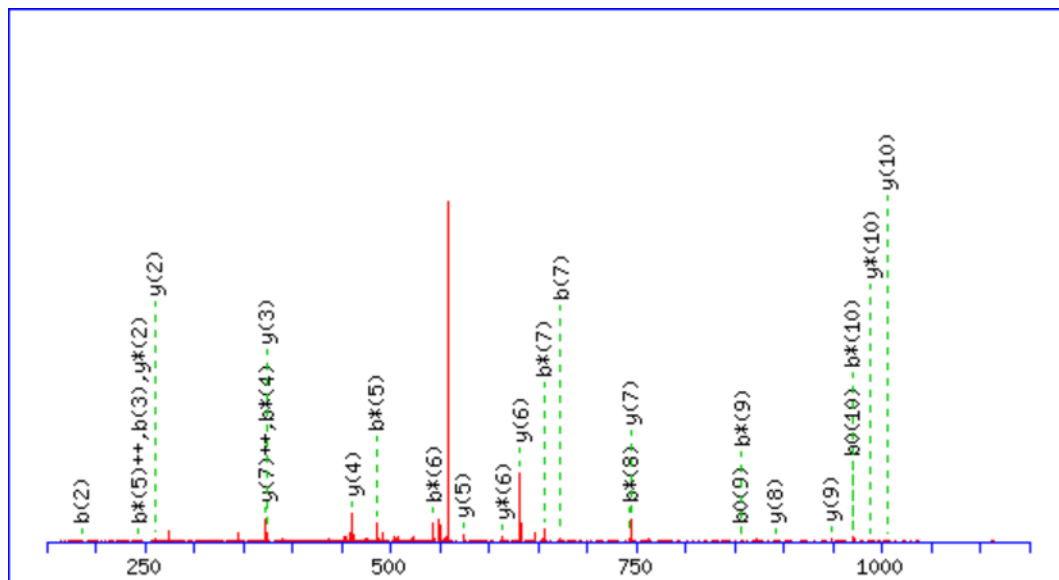

## Peptide View

MS/MS Fragmentation of **SYELTQPPSVSVSPGQTAR**

Found in **IPI00382440**, Tax\_Id=9606 Gene\_Symbol=- Ig lambda chain V-IV region Hil

**Experiment:** 51 - PyB-3 **Fraction:** PyB-3

Match to Query 13449: 2002.995448 from(1002.505000,2+)

Title: OECHL100317\_27.13143.13143.2.dta

Data file \\Boromir\masse\Data LTQ-Orbitrap\Chrystelle Lacroix\Etude clinique sJPU\OECHL100317\_27.raw

**Monoisotopic mass of neutral peptide Mr(calc):** 2002.995987 **Fixed modifications:** Carbamidomethyl (C) (apply to specified residues or termini only) **Ions**

**Score:** 60 **Expect:** 0.00019 **Matches :** 33/202 fragment ions using 48 most intense peaks ([help](#))

| # | b          | b <sup>++</sup> | b <sup>*</sup> | b <sup>*++</sup> | b <sup>0</sup> | b <sup>0++</sup> | Seq. | y           | y <sup>++</sup> | y <sup>*</sup> | y <sup>*++</sup> | y <sup>0</sup> | y <sup>0++</sup> |
|---|------------|-----------------|----------------|------------------|----------------|------------------|------|-------------|-----------------|----------------|------------------|----------------|------------------|
| 1 | 88.039304  | 44.523290       |                |                  | 70.028739      | 35.518008        | S    |             |                 |                |                  |                |                  |
| 2 | 251.102633 | 126.054954      |                |                  | 233.092068     | 117.049672       | Y    | 1916.971234 | 958.989255      | 1899.944685    | 950.475981       | 1898.960669    | 949.9839         |
| 3 | 380.145226 | 190.576251      |                |                  | 362.134661     | 181.570969       | E    | 1753.907905 | 877.457591      | 1736.881356    | 868.944316       | 1735.897340    | 868.4523         |
| 4 | 493.229290 | 247.118283      |                |                  | 475.218725     | 238.113001       | L    | 1624.865312 | 812.936294      | 1607.838763    | 804.423020       | 1606.854747    | 803.9310         |
| 5 | 594.276969 | 297.642123      |                |                  | 576.266404     | 288.636840       | T    | 1511.781248 | 756.394262      | 1494.754699    | 747.880988       | 1493.770683    | 747.3889         |

|    |                    |            |             |                   |                    |                   |   |                    |                   |                    |            |             |          |
|----|--------------------|------------|-------------|-------------------|--------------------|-------------------|---|--------------------|-------------------|--------------------|------------|-------------|----------|
| 6  | <b>722.335547</b>  | 361.671412 | 705.308998  | 353.158137        | <b>704.324982</b>  | 352.666129        | Q | <b>1410.733569</b> | 705.870423        | <b>1393.707020</b> | 697.357148 | 1392.723004 | 696.8651 |
| 7  | 819.388311         | 410.197794 | 802.361762  | 401.684519        | 801.377746         | 401.192511        | P | <b>1282.674991</b> | <b>641.841134</b> | 1265.648442        | 633.327859 | 1264.664426 | 632.8358 |
| 8  | 916.441075         | 458.724176 | 899.414526  | 450.210901        | 898.430510         | 449.718893        | P | <b>1185.622227</b> | 593.314752        | 1168.595678        | 584.801477 | 1167.611662 | 584.3094 |
| 9  | 1003.473103        | 502.240190 | 986.446554  | <b>493.726915</b> | <b>985.462538</b>  | <b>493.234907</b> | S | 1088.569463        | 544.788370        | 1071.542914        | 536.275095 | 1070.558898 | 535.7830 |
| 10 | <b>1102.541517</b> | 551.774397 | 1085.514968 | 543.261122        | <b>1084.530952</b> | 542.769114        | V | 1001.537435        | 501.272356        | <b>984.510886</b>  | 492.759081 | 983.526870  | 492.2670 |
| 11 | 1189.573545        | 595.290411 | 1172.546996 | 586.777136        | 1171.562980        | 586.285128        | S | <b>902.469021</b>  | 451.738149        | 885.442472         | 443.224874 | 884.458456  | 442.7328 |
| 12 | <b>1288.641959</b> | 644.824618 | 1271.615410 | 636.311343        | <b>1270.631394</b> | 635.819335        | V | <b>815.436993</b>  | 408.222135        | 798.410444         | 399.708860 | 797.426428  | 399.2168 |
| 13 | <b>1375.673987</b> | 688.340632 | 1358.647438 | 679.827357        | 1357.663422        | 679.335349        | S | <b>716.368579</b>  | 358.687928        | 699.342030         | 350.174653 | 698.358014  | 349.6826 |
| 14 | 1472.726751        | 736.867014 | 1455.700202 | 728.353739        | 1454.716186        | 727.861731        | P | <b>629.336551</b>  | 315.171914        | 612.310002         | 306.658639 | 611.325986  | 306.1666 |
| 15 | 1529.748215        | 765.377746 | 1512.721666 | 756.864471        | <b>1511.737650</b> | 756.372463        | G | 532.283787         | 266.645532        | 515.257238         | 258.132257 | 514.273222  | 257.6402 |
| 16 | <b>1657.806793</b> | 829.407035 | 1640.780244 | 820.893760        | <b>1639.796228</b> | 820.401752        | Q | <b>475.262323</b>  | 238.134800        | 458.235774         | 229.621525 | 457.251758  | 229.1295 |
| 17 | 1758.854472        | 879.930874 | 1741.827923 | 871.417600        | 1740.843907        | 870.925592        | T | 347.203745         | 174.105510        | 330.177196         | 165.592236 | 329.193180  | 165.1002 |
| 18 | <b>1829.891586</b> | 915.449431 | 1812.865037 | 906.936157        | <b>1811.881021</b> | 906.444149        | A | 246.156066         | 123.581671        | 229.129517         | 115.068396 |             |          |
| 19 |                    |            |             |                   |                    |                   | R | 175.118952         | 88.063114         | 158.092403         | 79.549839  |             |          |

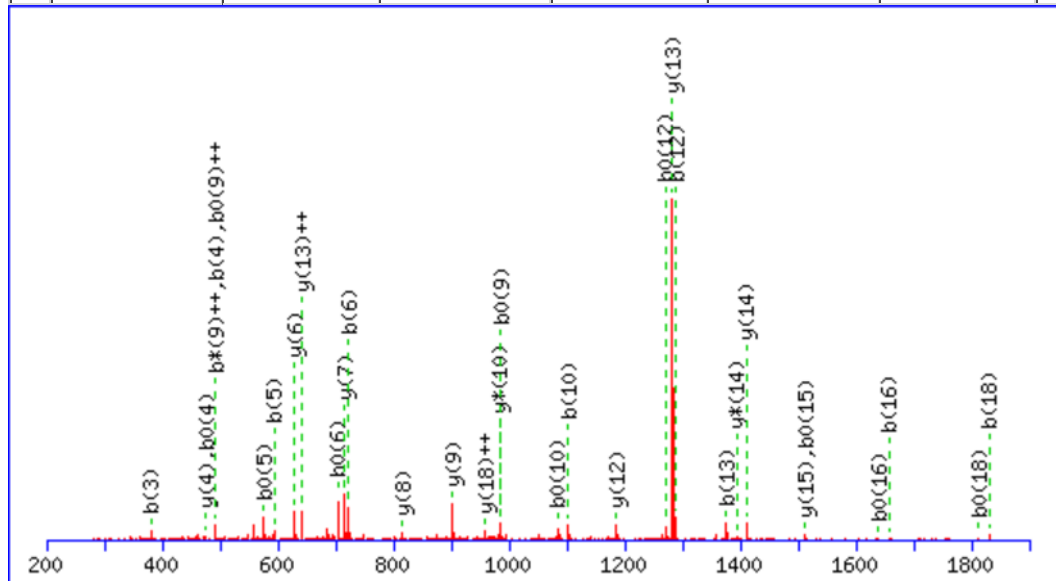

## Peptide View

MS/MS Fragmentation of **ATGDIKVTSEIK**Found in **IPI00302614**, Tax\_Id=9606 Gene\_Symbol=VTCN1 V-set domain containing T cell activation inhibitor 1**Experiment:** 51 - PyB-3 **Fraction:** PyB-3

Match to Query 8456: 1389.735848 from(695.875200,2+)

Title: OECHL100317\_27.8499.8499.2.dta

Data file \\Boromir\masse\Data LTQ-Orbitrap\Chrystelle Lacroix\Etude clinique sJPU\OECHL100317\_27.raw

**Monoisotopic mass of neutral peptide Mr(calc):** 1389.735107**Fixed modifications:** Carbamidomethyl (C) (apply to specified residues or termini only)**Ions****Score:** 49 **Expect:** 0.0011**Matches :** 11/128 fragment ions using 12 most intense peaks ([help](#))

| #  | b                  | b <sup>++</sup> | b*          | b <sup>*++</sup> | b <sup>0</sup> | b <sup>0++</sup> | Seq. | y                  | y <sup>++</sup>   | y*          | y <sup>*++</sup>  | y <sup>0</sup> | y <sup>0++</sup> |
|----|--------------------|-----------------|-------------|------------------|----------------|------------------|------|--------------------|-------------------|-------------|-------------------|----------------|------------------|
| 1  | 72.044390          | 36.525833       |             |                  |                |                  | A    |                    |                   |             |                   |                |                  |
| 2  | 173.092069         | 87.049672       |             |                  | 155.081504     | 78.044390        | T    | 1319.705288        | 660.356282        | 1302.678739 | 651.843008        | 1301.694723    | 651.3509         |
| 3  | 230.113533         | 115.560404      |             |                  | 212.102968     | 106.555122       | G    | 1218.657609        | 609.832442        | 1201.631060 | 601.319168        | 1200.647044    | 600.8271         |
| 4  | <b>345.140476</b>  | 173.073876      |             |                  | 327.129911     | 164.068593       | D    | 1161.636145        | 581.321710        | 1144.609596 | 572.808436        | 1143.625580    | 572.3164         |
| 5  | 458.224540         | 229.615908      |             |                  | 440.213975     | 220.610626       | I    | <b>1046.609202</b> | <b>523.808239</b> | 1029.582653 | 515.294964        | 1028.598637    | 514.8029         |
| 6  | 586.319503         | 293.663390      | 569.292954  | 285.150115       | 568.308938     | 284.658107       | K    | <b>933.525138</b>  | 467.266207        | 916.498589  | 458.752932        | 915.514573     | 458.2609         |
| 7  | 685.387917         | 343.197597      | 668.361368  | 334.684322       | 667.377352     | 334.192314       | V    | <b>805.430175</b>  | 403.218725        | 788.403626  | 394.705451        | 787.419610     | 394.2134         |
| 8  | 786.435596         | 393.721436      | 769.409047  | 385.208162       | 768.425031     | 384.716154       | T    | <b>706.361761</b>  | 353.684518        | 689.335212  | <b>345.171244</b> | 688.351196     | 344.6792         |
| 9  | 915.478189         | 458.242733      | 898.451640  | 449.729458       | 897.467624     | 449.237450       | E    | 605.314082         | 303.160679        | 588.287533  | 294.647404        | 587.303517     | 294.1553         |
| 10 | 1002.510217        | 501.758747      | 985.483668  | 493.245472       | 984.499652     | 492.753464       | S    | <b>476.271489</b>  | 238.639382        | 459.244940  | 230.126108        | 458.260924     | 229.6341         |
| 11 | <b>1131.552810</b> | 566.280043      | 1114.526261 | 557.766769       | 1113.542245    | 557.274760       | E    | 389.239461         | 195.123368        | 372.212912  | 186.610094        | 371.228896     | 186.1180         |
| 12 | <b>1244.636874</b> | 622.822075      | 1227.610325 | 614.308800       | 1226.626309    | 613.816792       | I    | <b>260.196868</b>  | 130.602072        | 243.170319  | 122.088797        |                |                  |
| 13 |                    |                 |             |                  |                |                  | K    | 147.112804         | 74.060040         | 130.086255  | 65.546765         |                |                  |

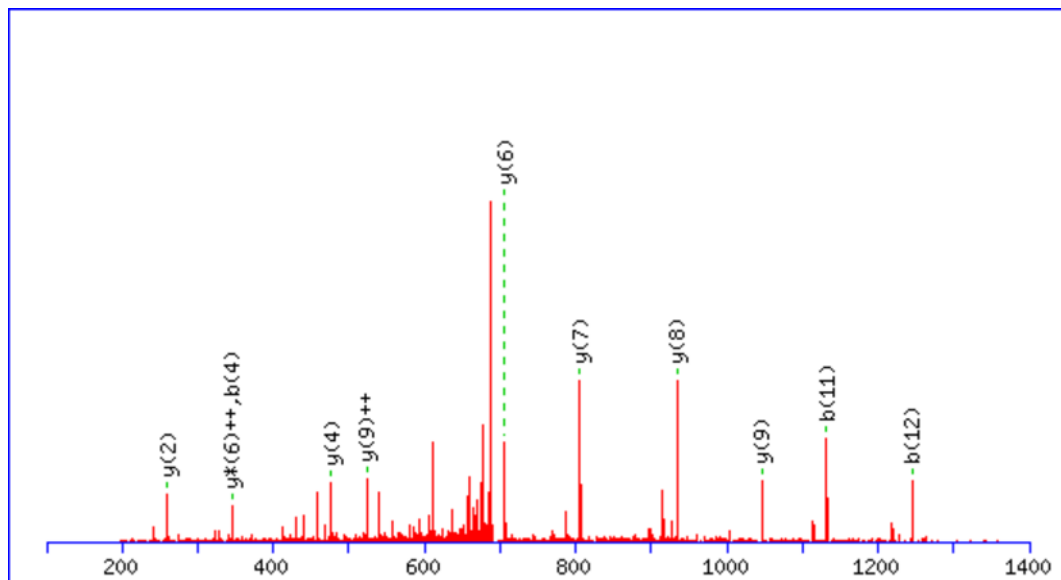

## Peptide View

MS/MS Fragmentation of **STVEELHEPIPSLFR**

Found in **IPI00410487**, Tax\_Id=9606 Gene\_Symbol=TWSG1 Isoform 1 of Twisted gastrulation protein homolog 1

**Experiment:** 51 - PyB-3 **Fraction:** PyB-3

Match to Query 12173: 1752.906648 from(877.460600,2+)

Title: OECHL100317\_27.16743.16743.2.dta

Data file \\Boromir\masse\Data LTQ-Orbitrap\Chrystelle Lacroix\Etude clinique sJPU\OECHL100317\_27.raw

**Monoisotopic mass of neutral peptide Mr(calc):** 1752.904633**Fixed modifications:** Carbamidomethyl (C) (apply to specified residues or termini only)**Ions**

**Score:** 74 **Expect:** 4.3e-006**Matches :** 30/134 fragment ions using 56 most intense peaks ([help](#))

| # | b                 | b <sup>++</sup> | b <sup>0</sup>    | b <sup>0++</sup> | Seq. | y                  | y <sup>++</sup>   | y*          | y <sup>*++</sup>  | y <sup>0</sup>     | y <sup>0++</sup>  | #  |
|---|-------------------|-----------------|-------------------|------------------|------|--------------------|-------------------|-------------|-------------------|--------------------|-------------------|----|
| 1 | 88.039304         | 44.523290       | 70.028739         | 35.518008        | S    |                    |                   |             |                   |                    |                   | 15 |
| 2 | 189.086983        | 95.047129       | 171.076418        | 86.041847        | T    | 1666.879898        | 833.943587        | 1649.853349 | 825.430313        | 1648.869333        | 824.938304        | 14 |
| 3 | <b>288.155397</b> | 144.581336      | <b>270.144832</b> | 135.576054       | V    | 1565.832219        | 783.419748        | 1548.805670 | 774.906473        | 1547.821654        | 774.414465        | 13 |
| 4 | <b>417.197990</b> | 209.102633      | <b>399.187425</b> | 200.097351       | E    | <b>1466.763805</b> | <b>733.885541</b> | 1449.737256 | <b>725.372266</b> | 1448.753240        | <b>724.880258</b> | 12 |
| 5 | <b>546.240583</b> | 273.623930      | <b>528.230018</b> | 264.618647       | E    | <b>1337.721212</b> | 669.364244        | 1320.694663 | 660.850970        | <b>1319.710647</b> | 660.358961        | 11 |

|    |                    |            |                    |            |   |                    |                   |             |            |             |            |           |
|----|--------------------|------------|--------------------|------------|---|--------------------|-------------------|-------------|------------|-------------|------------|-----------|
| 6  | <b>659.324647</b>  | 330.165962 | <b>641.314082</b>  | 321.160679 | L | <b>1208.678619</b> | 604.842948        | 1191.652070 | 596.329673 | 1190.668054 | 595.837665 | <b>10</b> |
| 7  | <b>796.383559</b>  | 398.695418 | 778.372994         | 389.690135 | H | <b>1095.594555</b> | <b>548.300915</b> | 1078.568006 | 539.787641 | 1077.583990 | 539.295633 | <b>9</b>  |
| 8  | <b>925.426152</b>  | 463.216714 | 907.415587         | 454.211432 | E | <b>958.535643</b>  | 479.771460        | 941.509094  | 471.258185 | 940.525078  | 470.766177 | <b>8</b>  |
| 9  | <b>1022.478916</b> | 511.743096 | 1004.468351        | 502.737814 | P | <b>829.493050</b>  | 415.250163        | 812.466501  | 406.736889 | 811.482485  | 406.244881 | <b>7</b>  |
| 10 | <b>1135.562980</b> | 568.285128 | 1117.552415        | 559.279845 | I | 732.440286         | 366.723781        | 715.413737  | 358.210507 | 714.429721  | 357.718499 | <b>6</b>  |
| 11 | <b>1232.615744</b> | 616.811510 | 1214.605179        | 607.806227 | P | <b>619.356222</b>  | 310.181749        | 602.329673  | 301.668475 | 601.345657  | 301.176467 | <b>5</b>  |
| 12 | <b>1319.647772</b> | 660.327524 | 1301.637207        | 651.322242 | S | <b>522.303458</b>  | 261.655367        | 505.276909  | 253.142093 | 504.292893  | 252.650085 | <b>4</b>  |
| 13 | <b>1432.731836</b> | 716.869556 | <b>1414.721271</b> | 707.864273 | L | 435.271430         | 218.139353        | 418.244881  | 209.626078 |             |            | <b>3</b>  |
| 14 | <b>1579.800250</b> | 790.403763 | 1561.789685        | 781.398481 | F | 322.187366         | 161.597321        | 305.160817  | 153.084047 |             |            | <b>2</b>  |
| 15 |                    |            |                    |            | R | 175.118952         | 88.063114         | 158.092403  | 79.549839  |             |            | <b>1</b>  |

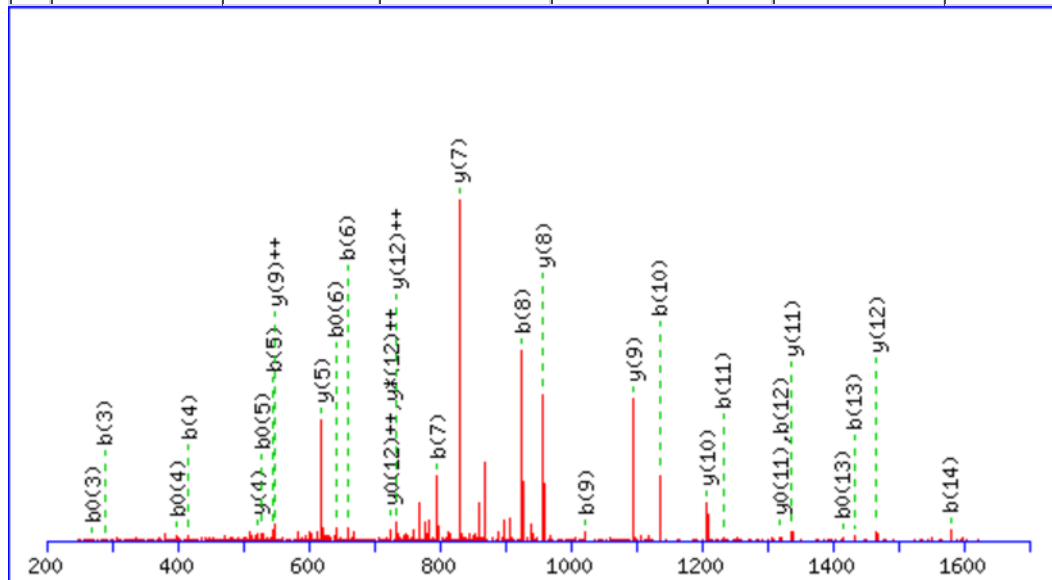

## Peptide View

MS/MS Fragmentation of **LDDCGLTEAR**

Found in **IPI00550069**, Tax\_Id=9606 Gene\_Symbol=RNH1 Ribonuclease inhibitor

Experiment: 51 - PyB-3 Fraction: PyB-3

Match to Query 5419: 1148.511848 from(575.263200,2+)

Title: OECHL100317\_27.8317.8317.2.dta

Data file \\Boromir\masse\Data LTQ-Orbitrap\Chrystelle Lacroix\Etude clinique sJPU\OECHL100317\_27.raw

**Monoisotopic mass of neutral peptide Mr(calc):** 1148.513184**Fixed modifications:** Carbamidomethyl (C) (apply to specified residues or termini only)**Ions****Score:** 51 **Expect:** 0.00041**Matches :** 14/84 fragment ions using 20 most intense peaks ([help](#))

| #  | b                 | b <sup>++</sup> | b <sup>0</sup> | b <sup>0++</sup> | Seq. | y                 | y <sup>++</sup> | y*                | y* <sup>++</sup> | y <sup>0</sup> | y <sup>0++</sup>  | #  |
|----|-------------------|-----------------|----------------|------------------|------|-------------------|-----------------|-------------------|------------------|----------------|-------------------|----|
| 1  | 114.091340        | 57.549308       |                |                  | L    |                   |                 |                   |                  |                |                   | 10 |
| 2  | <b>229.118283</b> | 115.062779      | 211.107718     | 106.057497       | D    | 1036.436401       | 518.721839      | 1019.409852       | 510.208564       | 1018.425836    | 509.716556        | 9  |
| 3  | <b>344.145226</b> | 172.576251      | 326.134661     | 163.570968       | D    | <b>921.409458</b> | 461.208367      | 904.382909        | 452.695093       | 903.398893     | 452.203085        | 8  |
| 4  | 504.175875        | 252.591575      | 486.165310     | 243.586293       | C    | <b>806.382515</b> | 403.694896      | 789.355966        | 395.181621       | 788.371950     | 394.689613        | 7  |
| 5  | 561.197339        | 281.102308      | 543.186774     | 272.097025       | G    | <b>646.351866</b> | 323.679571      | 629.325317        | 315.166297       | 628.341301     | 314.674289        | 6  |
| 6  | <b>674.281403</b> | 337.644340      | 656.270838     | 328.639057       | L    | <b>589.330402</b> | 295.168839      | 572.303853        | 286.655565       | 571.319837     | 286.163557        | 5  |
| 7  | <b>775.329082</b> | 388.168179      | 757.318517     | 379.162897       | T    | <b>476.246338</b> | 238.626807      | 459.219789        | 230.113532       | 458.235773     | <b>229.621524</b> | 4  |
| 8  | 904.371675        | 452.689476      | 886.361110     | 443.684193       | E    | <b>375.198659</b> | 188.102967      | 358.172110        | 179.589693       | 357.188094     | 179.097685        | 3  |
| 9  | <b>975.408789</b> | 488.208033      | 957.398224     | 479.202750       | A    | <b>246.156066</b> | 123.581671      | <b>229.129517</b> | 115.068396       |                |                   | 2  |
| 10 |                   |                 |                |                  | R    | 175.118952        | 88.063114       | 158.092403        | 79.549839        |                |                   | 1  |

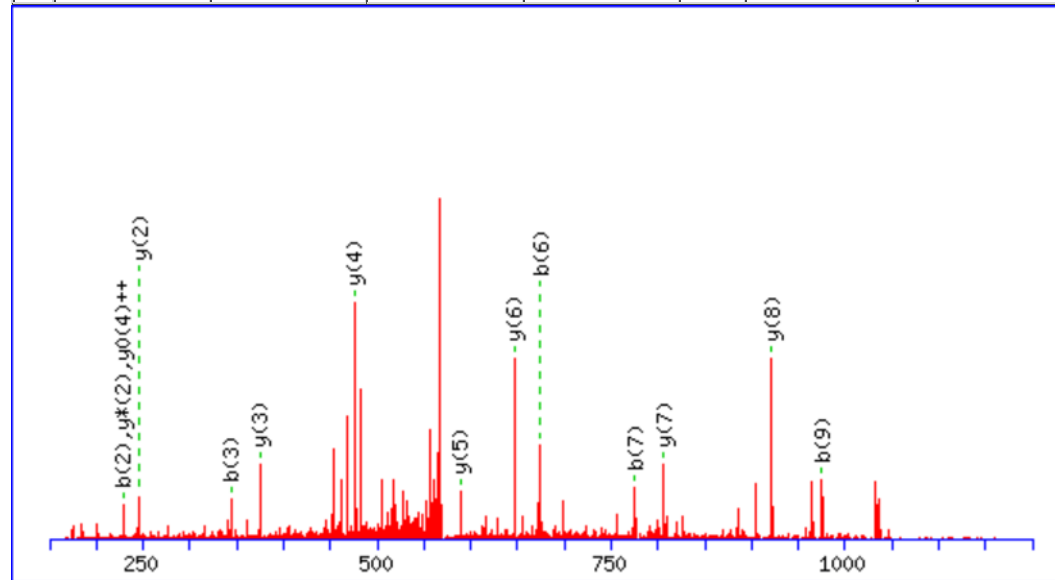

## Peptide View

MS/MS Fragmentation of **SGAPAAESKEIVR**Found in **IPI00299977**, Tax\_Id=9606 Gene\_Symbol=PHPT1 14 kDa phosphohistidine phosphatase**Experiment:** 51 - PyB-3 **Fraction:** PyB-3

Match to Query 7814: 1313.695448 from(657.855000,2+)

Title: OECHL100317\_27.5400.5400.2.dta

Data file \\Boromir\masse\Data LTQ-Orbitrap\Chrystelle Lacroix\Etude clinique sJPU\OECHL100317\_27.raw

**Monoisotopic mass of neutral peptide Mr(calc):** 1313.693893**Fixed modifications:** Carbamidomethyl (C) (apply to specified residues or termini only)**Ions****Score:** 53 **Expect:** 0.0006**Matches :** 44/122 fragment ions using 111 most intense peaks ([help](#))

| #  | b                  | b <sup>++</sup> | b*                 | b <sup>*++</sup>  | b <sup>0</sup>     | b <sup>0++</sup>  | Seq. | y                  | y <sup>++</sup>   | y*                 | y <sup>*++</sup>  | y <sup>0</sup>    | y <sup>0++</sup> |
|----|--------------------|-----------------|--------------------|-------------------|--------------------|-------------------|------|--------------------|-------------------|--------------------|-------------------|-------------------|------------------|
| 1  | 88.039304          | 44.523290       |                    |                   | 70.028739          | 35.518008         | S    |                    |                   |                    |                   |                   |                  |
| 2  | 145.060768         | 73.034022       |                    |                   | 127.050203         | 64.028740         | G    | <b>1227.669177</b> | 614.338227        | <b>1210.642628</b> | 605.824952        | 1209.658612       | 605.3329         |
| 3  | <b>216.097882</b>  | 108.552579      |                    |                   | 198.087317         | 99.547296         | A    | <b>1170.647713</b> | <b>585.827495</b> | 1153.621164        | 577.314220        | 1152.637148       | 576.8222         |
| 4  | <b>313.150646</b>  | 157.078961      |                    |                   | 295.140081         | 148.073679        | P    | <b>1099.610599</b> | <b>550.308938</b> | 1082.584050        | <b>541.795663</b> | 1081.600034       | <b>541.3036</b>  |
| 5  | <b>384.187760</b>  | 192.597518      |                    |                   | <b>366.177195</b>  | 183.592235        | A    | <b>1002.557835</b> | <b>501.782556</b> | 985.531286         | 493.269281        | 984.547270        | 492.7772         |
| 6  | <b>455.224874</b>  | 228.116075      |                    |                   | <b>437.214309</b>  | 219.110792        | A    | <b>931.520721</b>  | <b>466.263999</b> | 914.494172         | <b>457.750724</b> | 913.510156        | <b>457.2587</b>  |
| 7  | <b>584.267467</b>  | 292.637372      |                    |                   | <b>566.256902</b>  | 283.632089        | E    | <b>860.483607</b>  | 430.745442        | <b>843.457058</b>  | 422.232167        | <b>842.473042</b> | 421.7401         |
| 8  | 671.299495         | 336.153386      |                    |                   | 653.288930         | 327.148103        | S    | <b>731.441014</b>  | <b>366.224145</b> | <b>714.414465</b>  | 357.710871        | <b>713.430449</b> | 357.2188         |
| 9  | <b>799.394458</b>  | 400.200867      | 782.367909         | 391.687592        | 781.383893         | 391.195585        | K    | <b>644.408986</b>  | 322.708131        | 627.382437         | 314.194857        | <b>626.398421</b> | <b>313.7028</b>  |
| 10 | <b>928.437051</b>  | 464.722164      | 911.410502         | <b>456.208889</b> | 910.426486         | <b>455.716881</b> | E    | <b>516.314023</b>  | 258.660650        | 499.287474         | 250.147375        | 498.303458        | 249.6553         |
| 11 | <b>1041.521115</b> | 521.264196      | <b>1024.494566</b> | 512.750921        | <b>1023.510550</b> | 512.258913        | I    | <b>387.271430</b>  | 194.139353        | 370.244881         | 185.626079        |                   |                  |
| 12 | <b>1140.589529</b> | 570.798403      | 1123.562980        | 562.285128        | 1122.578964        | 561.793120        | V    | <b>274.187366</b>  | 137.597321        | <b>257.160817</b>  | 129.084047        |                   |                  |
| 13 |                    |                 |                    |                   |                    |                   | R    | 175.118952         | 88.063114         | 158.092403         | 79.549839         |                   |                  |



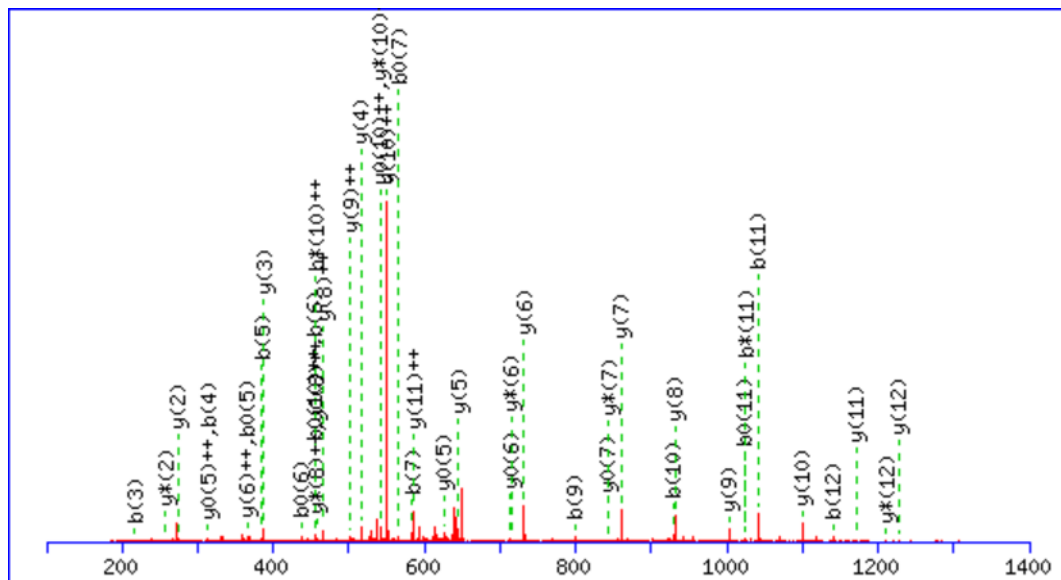

## Peptide View

MS/MS Fragmentation of **IESVLSSGKR**

Found in **IPI00018236**, Tax\_Id=9606 Gene\_Symbol=GM2A Ganglioside GM2 activator

**Experiment:** 51 - PyB-3 **Fraction:** PyB-3

Match to Query 5666: 1161.635848 from(581.825200,2+)

Title: OECHL100317\_27.5747.5747.2.dta

Data file \\Boromir\masse\Data LTQ-Orbitrap\Chrystelle Lacroix\Etude clinique sJPU\OECHL100317\_27.raw

**Monoisotopic mass of neutral peptide Mr(calc):** 1161.635330 **Fixed modifications:** Carbamidomethyl (C) (apply to specified residues or termini only) **Ions**

**Score:** 70 **Expect:** 5.9e-006 **Matches :** 26/94 fragment ions using 40 most intense peaks ([help](#))

| # | b                 | b <sup>++</sup>   | b <sup>*</sup> | b <sup>*++</sup> | b <sup>0</sup>    | b <sup>0++</sup> | Seq. | y                  | y <sup>++</sup>   | y <sup>*</sup>    | y <sup>*++</sup> | y <sup>0</sup>    | y <sup>0++</sup> |
|---|-------------------|-------------------|----------------|------------------|-------------------|------------------|------|--------------------|-------------------|-------------------|------------------|-------------------|------------------|
| 1 | 114.091340        | 57.549308         |                |                  |                   |                  | I    |                    |                   |                   |                  |                   |                  |
| 2 | <b>243.133933</b> | 122.070605        |                |                  | 225.123368        | 113.065322       | E    | <b>1049.558562</b> | <b>525.282919</b> | 1032.532013       | 516.769645       | 1031.547997       | 516.277637       |
| 3 | <b>330.165961</b> | 165.586618        |                |                  | <b>312.155396</b> | 156.581336       | S    | <b>920.515969</b>  | <b>460.761623</b> | <b>903.489420</b> | 452.248348       | <b>902.505404</b> | 451.756340       |
| 4 | 429.234375        | <b>215.120826</b> |                |                  | <b>411.223810</b> | 206.115543       | V    | <b>833.483941</b>  | 417.245609        | 816.457392        | 408.732334       | <b>815.473376</b> | 408.240326       |
| 5 | 542.318439        | 271.662858        |                |                  | 524.307874        | 262.657575       | L    | <b>734.415527</b>  | <b>367.711402</b> | 717.388978        | 359.198127       | <b>716.404962</b> | 358.706119       |

|    |            |            |            |            |            |            |   |            |            |            |            |            |            |
|----|------------|------------|------------|------------|------------|------------|---|------------|------------|------------|------------|------------|------------|
| 6  | 629.350467 | 315.178872 |            |            | 611.339902 | 306.173589 | S | 621.331463 | 311.169370 | 604.304914 | 302.656095 | 603.320898 | 302.164087 |
| 7  | 716.382495 | 358.694886 |            |            | 698.371930 | 349.689603 | S | 534.299435 | 267.653356 | 517.272886 | 259.140081 | 516.288870 | 258.648073 |
| 8  | 803.414523 | 402.210899 |            |            | 785.403958 | 393.205617 | S | 447.267407 | 224.137342 | 430.240858 | 215.624067 | 429.256842 | 215.132059 |
| 9  | 860.435987 | 430.721632 |            |            | 842.425422 | 421.716349 | G | 360.235379 | 180.621328 | 343.208830 | 172.108053 |            |            |
| 10 | 988.530950 | 494.769113 | 971.504401 | 486.255838 | 970.520385 | 485.763830 | K | 303.213915 | 152.110596 | 286.187366 | 143.597321 |            |            |
| 11 |            |            |            |            |            |            | R | 175.118952 | 88.063114  | 158.092403 | 79.549840  |            |            |

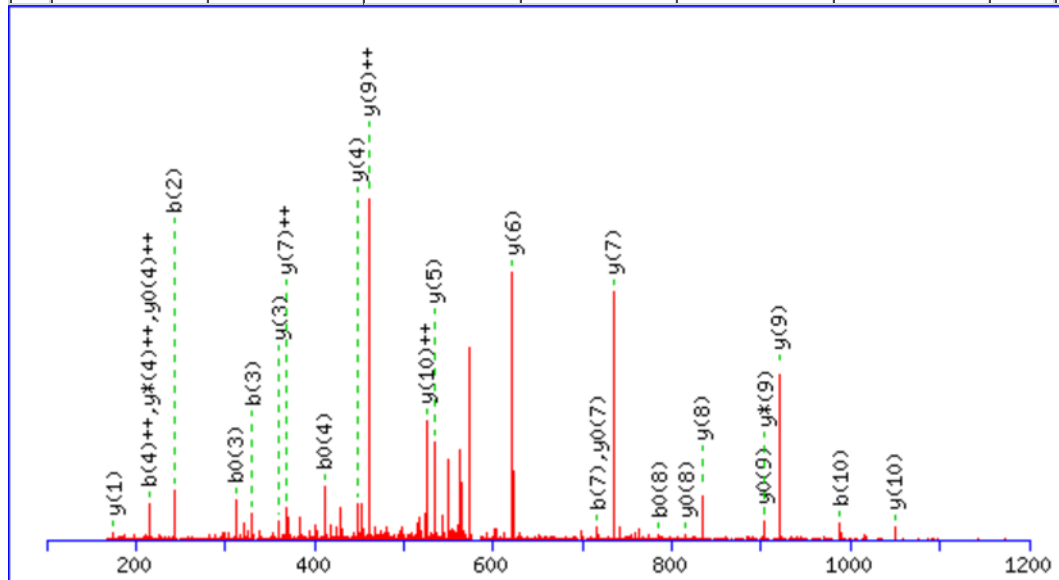

## Peptide View

MS/MS Fragmentation of **YSGSEGSTQLTKGELK**

Found in **IPI00017526**, Tax\_Id=9606 Gene\_Symbol=S100P Protein S100-P

Experiment: 51 - PyB-3 Fraction: PyB-3

Match to Query 12329: 1784.879648 from(893.447100,2+)

Title: OECHL100317\_27.8016.8016.2.dta

Data file \\Boromir\masse\Data LTQ-Orbitrap\Chrystelle Lacroix\Etude clinique sJPU\OECHL100317\_27.raw

**Monoisotopic mass of neutral peptide Mr(calc): 1784.879211** Fixed modifications: Carbamidomethyl (C) (apply to specified residues or termini only) Ions

Score: 66 Expect: 3.8e-005 Matches : 16/170 fragment ions using 30 most intense peaks ([help](#))

| #         | <b>b</b>           | <b>b<sup>++</sup></b> | <b>b*</b>   | <b>b*<sup>++</sup></b> | <b>b<sup>0</sup></b> | <b>b<sup>0++</sup></b> | Seq.     | <b>y</b>           | <b>y<sup>++</sup></b> | <b>y*</b>   | <b>y*<sup>++</sup></b> | <b>y<sup>0</sup></b> | <b>y<sup>0++</sup></b> |
|-----------|--------------------|-----------------------|-------------|------------------------|----------------------|------------------------|----------|--------------------|-----------------------|-------------|------------------------|----------------------|------------------------|
| <b>1</b>  | 164.070605         | 82.538940             |             |                        |                      |                        | <b>Y</b> |                    |                       |             |                        |                      |                        |
| <b>2</b>  | 251.102633         | 126.054954            |             |                        | 233.092068           | 117.049672             | <b>S</b> | 1622.823172        | 811.915224            | 1605.796623 | 803.401950             | 1604.812607          | 802.9099               |
| <b>3</b>  | 308.124097         | 154.565687            |             |                        | 290.113532           | 145.560404             | <b>G</b> | 1535.791144        | <b>768.399210</b>     | 1518.764595 | 759.885936             | 1517.780579          | 759.3939               |
| <b>4</b>  | 395.156125         | 198.081701            |             |                        | 377.145560           | 189.076418             | <b>S</b> | 1478.769680        | 739.888478            | 1461.743131 | 731.375204             | 1460.759115          | 730.8831               |
| <b>5</b>  | <b>524.198718</b>  | 262.602997            |             |                        | 506.188153           | 253.597715             | <b>E</b> | <b>1391.737652</b> | 696.372464            | 1374.711103 | 687.859190             | 1373.727087          | 687.3671               |
| <b>6</b>  | 581.220182         | 291.113729            |             |                        | 563.209617           | 282.108447             | <b>G</b> | <b>1262.695059</b> | <b>631.851167</b>     | 1245.668510 | 623.337893             | 1244.684494          | 622.8458               |
| <b>7</b>  | 668.252210         | 334.629743            |             |                        | 650.241645           | <b>325.624461</b>      | <b>S</b> | <b>1205.673595</b> | 603.340436            | 1188.647046 | 594.827161             | 1187.663030          | 594.3351               |
| <b>8</b>  | 769.299889         | 385.153583            |             |                        | 751.289324           | 376.148300             | <b>T</b> | <b>1118.641567</b> | 559.824421            | 1101.615018 | 551.311147             | 1100.631002          | 550.8191               |
| <b>9</b>  | 897.358467         | 449.182872            | 880.331918  | 440.669597             | 879.347902           | 440.177589             | <b>Q</b> | <b>1017.593888</b> | 509.300582            | 1000.567339 | 500.787307             | 999.583323           | 500.2952               |
| <b>10</b> | 998.406146         | 499.706711            | 981.379597  | 491.193437             | 980.395581           | 490.701429             | <b>T</b> | 889.535310         | 445.271293            | 872.508761  | 436.758018             | 871.524745           | 436.2660               |
| <b>11</b> | 1111.490210        | 556.248743            | 1094.463661 | 547.735469             | 1093.479645          | 547.243461             | <b>L</b> | <b>788.487631</b>  | 394.747453            | 771.461082  | 386.234179             | 770.477066           | 385.7421               |
| <b>12</b> | 1212.537889        | 606.772583            | 1195.511340 | 598.259308             | 1194.527324          | 597.767300             | <b>T</b> | <b>675.403567</b>  | 338.205421            | 658.377018  | 329.692147             | 657.393002           | 329.2001               |
| <b>13</b> | 1340.632852        | 670.820064            | 1323.606303 | 662.306790             | 1322.622287          | 661.814782             | <b>K</b> | <b>574.355888</b>  | 287.681582            | 557.329339  | 279.168307             | 556.345323           | 278.6762               |
| <b>14</b> | 1397.654316        | 699.330796            | 1380.627767 | 690.817522             | 1379.643751          | 690.325514             | <b>G</b> | <b>446.260925</b>  | 223.634100            | 429.234376  | 215.120826             | 428.250360           | 214.6288               |
| <b>15</b> | <b>1526.696909</b> | 763.852093            | 1509.670360 | 755.338818             | 1508.686344          | 754.846810             | <b>E</b> | 389.239461         | 195.123368            | 372.212912  | 186.610094             | 371.228896           | 186.1180               |
| <b>16</b> | <b>1639.780973</b> | 820.394124            | 1622.754424 | 811.880850             | 1621.770408          | 811.388842             | <b>L</b> | <b>260.196868</b>  | 130.602072            | 243.170319  | 122.088797             |                      |                        |
| <b>17</b> |                    |                       |             |                        |                      |                        | <b>K</b> | 147.112804         | 74.060040             | 130.086255  | 65.546765              |                      |                        |

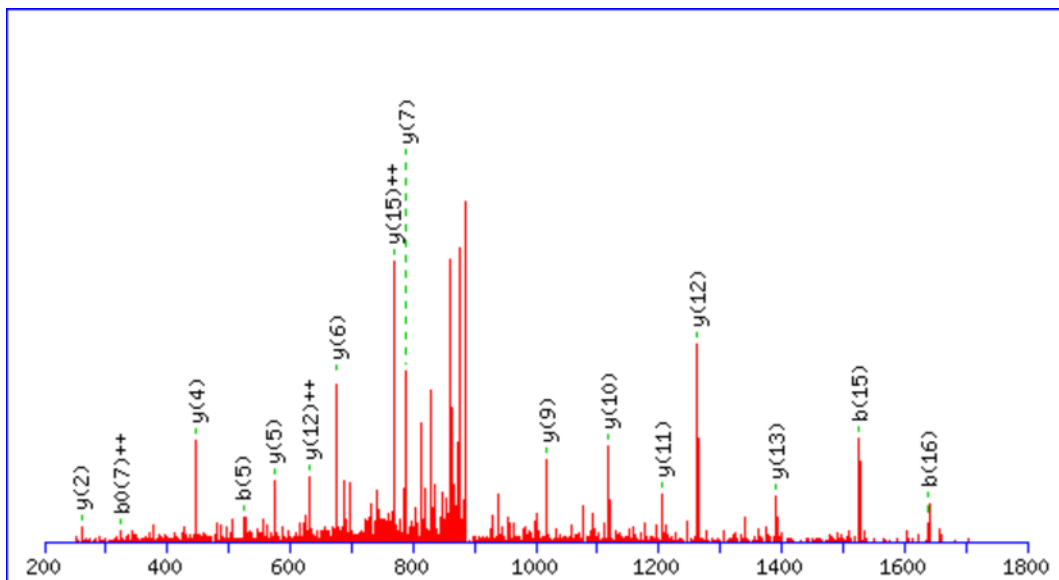

## Peptide View

MS/MS Fragmentation of **TGESAEFVCKR**

Found in **IPI00011264**, Tax\_Id=9606 Gene\_Symbol=CFHR1;LOC100293069 Complement factor H-related protein 1

**Experiment:** 51 - PyB-3 **Fraction:** PyB-3

Match to Query 7430: 1282.597648 from(642.306100,2+)

Title: OECHL100317\_27.5686.5686.2.dta

Data file \\Boromir\masse\Data LTQ-Orbitrap\Chrystelle Lacroix\Etude clinique sJPU\OECHL100317\_27.raw

**Monoisotopic mass of neutral peptide Mr(calc):** 1282.597580**Fixed modifications:** Carbamidomethyl (C) (apply to specified residues or termini only)**Ions**

**Score:** 56 **Expect:** 0.00013**Matches :** 23/92 fragment ions using 44 most intense peaks ([help](#))

| # | b                 | b <sup>++</sup> | b <sup>*</sup> | b <sup>*++</sup> | b <sup>0</sup>    | b <sup>0++</sup> | Seq. | y                  | y <sup>++</sup>   | y <sup>*</sup> | y <sup>*++</sup> | y <sup>0</sup>    | y <sup>0++</sup> |
|---|-------------------|-----------------|----------------|------------------|-------------------|------------------|------|--------------------|-------------------|----------------|------------------|-------------------|------------------|
| 1 | 102.054955        | 51.531116       |                |                  | 84.044390         | 42.525833        | T    |                    |                   |                |                  |                   |                  |
| 2 | 159.076419        | 80.041847       |                |                  | 141.065854        | 71.036565        | G    | <b>1182.557184</b> | <b>591.782230</b> | 1165.530635    | 583.268956       | 1164.546619       | 582.7769         |
| 3 | <b>288.119012</b> | 144.563144      |                |                  | <b>270.108447</b> | 135.557862       | E    | <b>1125.535720</b> | <b>563.271498</b> | 1108.509171    | 554.758224       | 1107.525155       | 554.2662         |
| 4 | <b>375.151040</b> | 188.079158      |                |                  | <b>357.140475</b> | 179.073876       | S    | <b>996.493127</b>  | <b>498.750202</b> | 979.466578     | 490.236927       | <b>978.482562</b> | 489.7449         |
| 5 | 446.188154        | 223.597715      |                |                  | 428.177589        | 214.592433       | A    | <b>909.461099</b>  | <b>455.234188</b> | 892.434550     | 446.720913       | 891.450534        | 446.2289         |

|    |             |            |             |            |             |            |   |            |            |            |            |            |          |
|----|-------------|------------|-------------|------------|-------------|------------|---|------------|------------|------------|------------|------------|----------|
| 6  | 575.230747  | 288.119012 |             |            | 557.220182  | 279.113729 | E | 838.423985 | 419.715631 | 821.397436 | 411.202356 | 820.413420 | 410.7103 |
| 7  | 722.299161  | 361.653219 |             |            | 704.288596  | 352.647936 | F | 709.381392 | 355.194334 | 692.354843 | 346.681060 |            |          |
| 8  | 821.367575  | 411.187426 |             |            | 803.357010  | 402.182143 | V | 562.312978 | 281.660127 | 545.286429 | 273.146853 |            |          |
| 9  | 981.398224  | 491.202750 |             |            | 963.387659  | 482.197468 | C | 463.244564 | 232.125920 | 446.218015 | 223.612645 |            |          |
| 10 | 1109.493187 | 555.250232 | 1092.466638 | 546.736957 | 1091.482622 | 546.244949 | K | 303.213915 | 152.110595 | 286.187366 | 143.597321 |            |          |
| 11 |             |            |             |            |             |            | R | 175.118952 | 88.063114  | 158.092403 | 79.549839  |            |          |

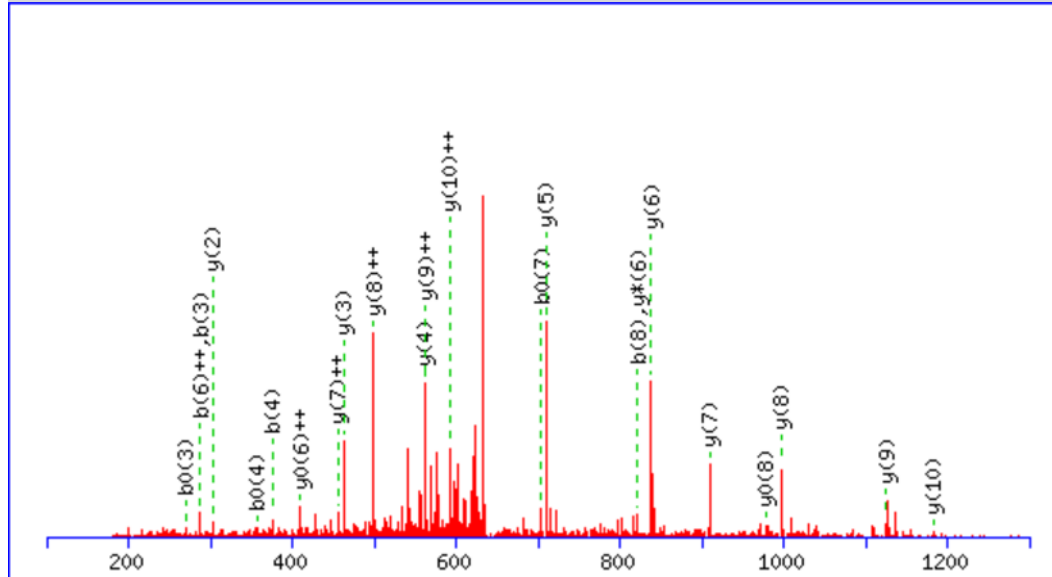

## Peptide View

MS/MS Fragmentation of **LLIYDASNR**

Found in **IPI00784430**, Tax\_Id=9606 Gene\_Symbol=IGKV3D-11 Similar to Ig kappa chain V-III region VG precursor

**Experiment:** 51 - PyB-3 **Fraction:** PyB-3

Match to Query 4350: 1063.564448 from(532.789500,2+)

Title: OECHL100317\_27.11764.11764.2.dta

Data file \\Boromir\masse\Data LTQ-Orbitrap\Chrystelle Lacroix\Etude clinique sJPU\OECHL100317\_27.raw

**Monoisotopic mass of neutral peptide Mr(calc):** 1063.566177 **Fixed modifications:** Carbamidomethyl (C) (apply to specified residues or termini only) **Ions**

**Score:** 51 **Expect:** 0.00062 **Matches :** 15/70 fragment ions using 36 most intense peaks ([help](#))

| # | b                 | b <sup>++</sup> | b*         | b <sup>*++</sup> | b <sup>0</sup> | b <sup>0++</sup> | Seq. | y                 | y <sup>++</sup>   | y*         | y <sup>*++</sup> | y <sup>0</sup> | y <sup>0++</sup> | # |
|---|-------------------|-----------------|------------|------------------|----------------|------------------|------|-------------------|-------------------|------------|------------------|----------------|------------------|---|
| 1 | 114.091340        | 57.549308       |            |                  |                |                  | L    |                   |                   |            |                  |                |                  | 9 |
| 2 | <b>227.175404</b> | 114.091340      |            |                  |                |                  | L    | <b>951.489421</b> | 476.248348        | 934.462872 | 467.735074       | 933.478856     | 467.243066       | 8 |
| 3 | <b>340.259468</b> | 170.633372      |            |                  |                |                  | I    | <b>838.405357</b> | <b>419.706316</b> | 821.378808 | 411.193042       | 820.394792     | 410.701034       | 7 |
| 4 | 503.322797        | 252.165036      |            |                  |                |                  | Y    | <b>725.321293</b> | 363.164285        | 708.294744 | 354.651010       | 707.310728     | 354.159002       | 6 |
| 5 | <b>618.349740</b> | 309.678508      |            |                  | 600.339175     | 300.673226       | D    | <b>562.257964</b> | 281.632620        | 545.231415 | 273.119345       | 544.247399     | 272.627337       | 5 |
| 6 | <b>689.386854</b> | 345.197065      |            |                  | 671.376289     | 336.191782       | A    | <b>447.231021</b> | 224.119148        | 430.204472 | 215.605874       | 429.220456     | 215.113866       | 4 |
| 7 | <b>776.418882</b> | 388.713079      |            |                  | 758.408317     | 379.707796       | S    | <b>376.193907</b> | 188.600591        | 359.167358 | 180.087317       | 358.183342     | 179.595309       | 3 |
| 8 | <b>890.461809</b> | 445.734542      | 873.435260 | 437.221268       | 872.451244     | 436.729260       | N    | <b>289.161879</b> | 145.084577        | 272.135330 | 136.571303       |                |                  | 2 |
| 9 |                   |                 |            |                  |                |                  | R    | <b>175.118952</b> | 88.063114         | 158.092403 | 79.549839        |                |                  | 1 |

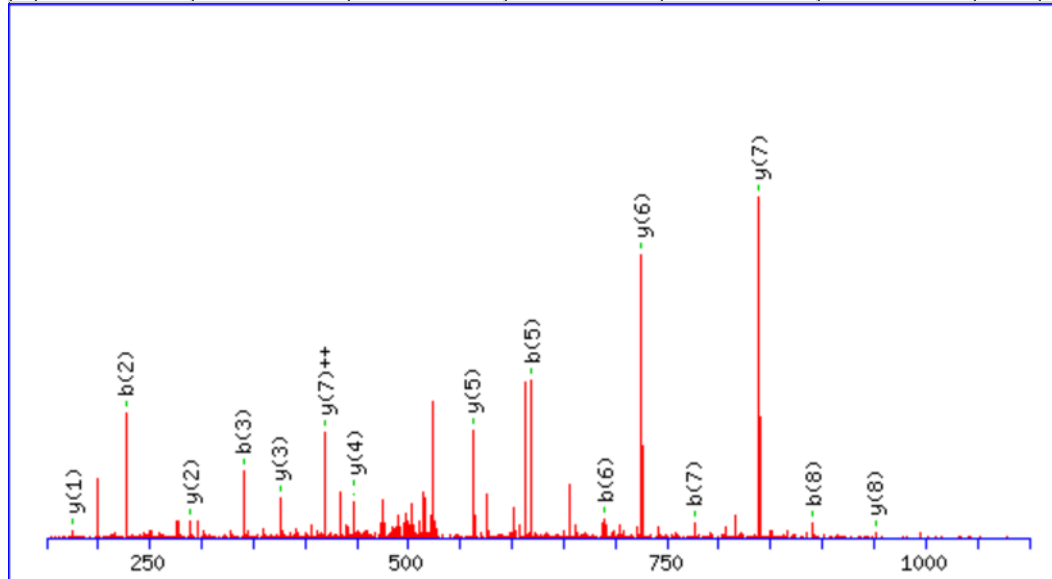

## Peptide View

MS/MS Fragmentation of **VATQEGKEITCR**

Found in **IPI00031564**, Tax\_Id=9606 Gene\_Symbol=GGCT Isoform 1 of Gamma-glutamylcyclotransferase

Experiment: 51 - PyB-3 Fraction: PyB-3

Match to Query 8463: 1390.688648 from(696.351600,2+)

Title: OECHL100317\_27.4205.4205.2.dta

Data file \\Boromir\masse\Data LTQ-Orbitrap\Chrystelle Lacroix\Etude clinique sJPU\OECHL100317\_27.raw

**Monoisotopic mass of neutral peptide Mr(calc):** 1390.687454**Fixed modifications:** Carbamidomethyl (C) (apply to specified residues or termini only)**Ions****Score:** 53 **Expect:** 0.00072**Matches :** 22/118 fragment ions using 46 most intense peaks ([help](#))

| #  | b           | b <sup>++</sup> | b*          | b <sup>*++</sup> | b <sup>0</sup> | b <sup>0++</sup> | Seq. | y           | y <sup>++</sup> | y*          | y <sup>*++</sup> | y <sup>0</sup> | y <sup>0++</sup> |
|----|-------------|-----------------|-------------|------------------|----------------|------------------|------|-------------|-----------------|-------------|------------------|----------------|------------------|
| 1  | 100.075690  | 50.541483       |             |                  |                |                  | V    |             |                 |             |                  |                |                  |
| 2  | 171.112804  | 86.060040       |             |                  |                |                  | A    | 1292.626328 | 646.816802      | 1275.599779 | 638.303528       | 1274.615763    | 637.8115         |
| 3  | 272.160483  | 136.583879      |             |                  | 254.149918     | 127.578597       | T    | 1221.589214 | 611.298245      | 1204.562665 | 602.784971       | 1203.578649    | 602.2929         |
| 4  | 400.219061  | 200.613169      | 383.192512  | 192.099894       | 382.208496     | 191.607886       | Q    | 1120.541535 | 560.774406      | 1103.514986 | 552.261131       | 1102.530970    | 551.7691         |
| 5  | 529.261654  | 265.134465      | 512.235105  | 256.621191       | 511.251089     | 256.129183       | E    | 992.482957  | 496.745117      | 975.456408  | 488.231842       | 974.472392     | 487.7398         |
| 6  | 586.283118  | 293.645197      | 569.256569  | 285.131923       | 568.272553     | 284.639915       | G    | 863.440364  | 432.223820      | 846.413815  | 423.710546       | 845.429799     | 423.2185         |
| 7  | 714.378081  | 357.692679      | 697.351532  | 349.179404       | 696.367516     | 348.687396       | K    | 806.418900  | 403.713088      | 789.392351  | 395.199814       | 788.408335     | 394.7078         |
| 8  | 843.420674  | 422.213975      | 826.394125  | 413.700701       | 825.410109     | 413.208693       | E    | 678.323937  | 339.665607      | 661.297388  | 331.152332       | 660.313372     | 330.6603         |
| 9  | 956.504738  | 478.756007      | 939.478189  | 470.242733       | 938.494173     | 469.750725       | I    | 549.281344  | 275.144310      | 532.254795  | 266.631036       | 531.270779     | 266.1390         |
| 10 | 1057.552417 | 529.279847      | 1040.525868 | 520.766572       | 1039.541852    | 520.274564       | T    | 436.197280  | 218.602278      | 419.170731  | 210.089003       | 418.186715     | 209.5969         |
| 11 | 1217.583066 | 609.295171      | 1200.556517 | 600.781897       | 1199.572501    | 600.289889       | C    | 335.149601  | 168.078438      | 318.123052  | 159.565164       |                |                  |
| 12 |             |                 |             |                  |                |                  | R    | 175.118952  | 88.063114       | 158.092403  | 79.549839        |                |                  |

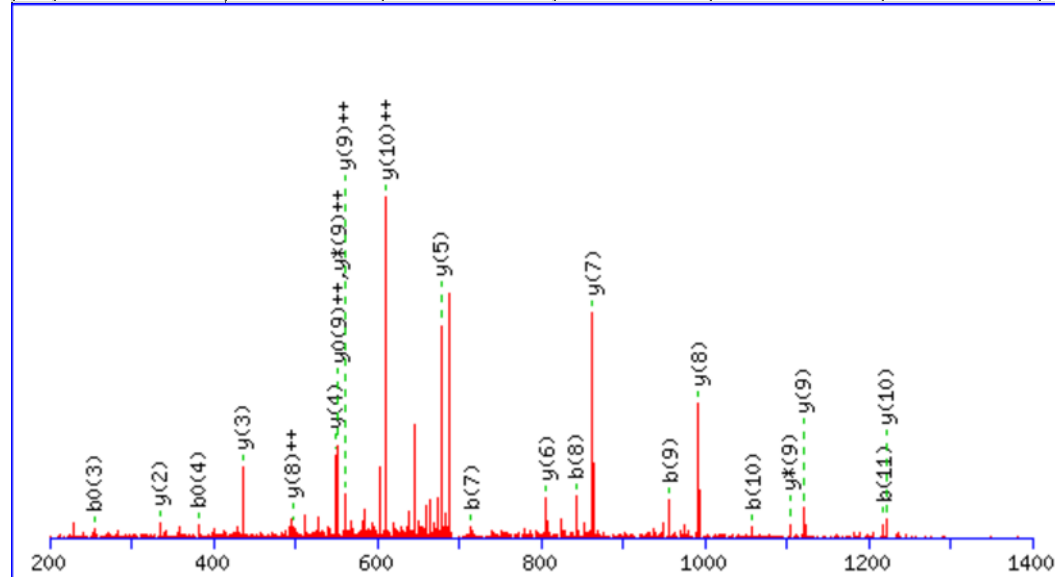

## Peptide View

MS/MS Fragmentation of **AVFVDLEPTVIDEVR**

Found in **IPI00909762**, Tax\_Id=9606 Gene\_Symbol=TUBA1B;TUBA1A cDNA FLJ53765, highly similar to Tubulin alpha chain

Experiment: 51 - PyB-3 Fraction: PyB-3

Match to Query 11779: 1700.902848 from(851.458700,2+)

Title: OECHL100317\_27.18065.18065.2.dta

Data file \\Boromir\masse\Data LTQ-Orbitrap\Chrystelle Lacroix\Etude clinique sJPU\OECHL100317\_27.raw

**Monoisotopic mass of neutral peptide Mr(calc):** 1700.898514**Fixed modifications:** Carbamidomethyl (C) (apply to specified residues or termini only)**Ions**

**Score:** 51 **Expect:** 0.001**Matches :** 11/128 fragment ions using 15 most intense peaks ([help](#))

| #  | b                 | b <sup>++</sup> | b <sup>0</sup> | b <sup>0++</sup> | Seq. | y                  | y <sup>++</sup> | y*          | y* <sup>++</sup> | y <sup>0</sup>     | y <sup>0++</sup> | #  |
|----|-------------------|-----------------|----------------|------------------|------|--------------------|-----------------|-------------|------------------|--------------------|------------------|----|
| 1  | 72.044390         | 36.525833       |                |                  | A    |                    |                 |             |                  |                    |                  | 15 |
| 2  | 171.112804        | 86.060040       |                |                  | V    | 1630.868665        | 815.937971      | 1613.842116 | 807.424696       | 1612.858100        | 806.932688       | 14 |
| 3  | <b>318.181218</b> | 159.594247      |                |                  | F    | 1531.800251        | 766.403764      | 1514.773702 | 757.890489       | 1513.789686        | 757.398481       | 13 |
| 4  | 417.249632        | 209.128454      |                |                  | V    | <b>1384.731837</b> | 692.869557      | 1367.705288 | 684.356282       | 1366.721272        | 683.864274       | 12 |
| 5  | 532.276575        | 266.641926      | 514.266010     | 257.636643       | D    | <b>1285.663423</b> | 643.335350      | 1268.636874 | 634.822075       | 1267.652858        | 634.330067       | 11 |
| 6  | <b>645.360639</b> | 323.183958      | 627.350074     | 314.178675       | L    | <b>1170.636480</b> | 585.821878      | 1153.609931 | 577.308604       | 1152.625915        | 576.816596       | 10 |
| 7  | <b>774.403232</b> | 387.705254      | 756.392667     | 378.699972       | E    | <b>1057.552416</b> | 529.279846      | 1040.525867 | 520.766572       | <b>1039.541851</b> | 520.274564       | 9  |
| 8  | 871.455996        | 436.231636      | 853.445431     | 427.226354       | P    | <b>928.509823</b>  | 464.758550      | 911.483274  | 456.245275       | 910.499258         | 455.753267       | 8  |
| 9  | 972.503675        | 486.755476      | 954.493110     | 477.750193       | T    | 831.457059         | 416.232168      | 814.430510  | 407.718893       | 813.446494         | 407.226885       | 7  |
| 10 | 1071.572089       | 536.289683      | 1053.561524    | 527.284400       | V    | 730.409380         | 365.708328      | 713.382831  | 357.195054       | 712.398815         | 356.703046       | 6  |
| 11 | 1184.656153       | 592.831715      | 1166.645588    | 583.826432       | I    | <b>631.340966</b>  | 316.174121      | 614.314417  | 307.660846       | 613.330401         | 307.168838       | 5  |
| 12 | 1299.683096       | 650.345186      | 1281.672531    | 641.339904       | D    | <b>518.256902</b>  | 259.632089      | 501.230353  | 251.118815       | 500.246337         | 250.626807       | 4  |
| 13 | 1428.725689       | 714.866483      | 1410.715124    | 705.861200       | E    | 403.229959         | 202.118617      | 386.203410  | 193.605343       | 385.219394         | 193.113335       | 3  |
| 14 | 1527.794103       | 764.400690      | 1509.783538    | 755.395407       | V    | 274.187366         | 137.597321      | 257.160817  | 129.084047       |                    |                  | 2  |
| 15 |                   |                 |                |                  | R    | 175.118952         | 88.063114       | 158.092403  | 79.549839        |                    |                  | 1  |



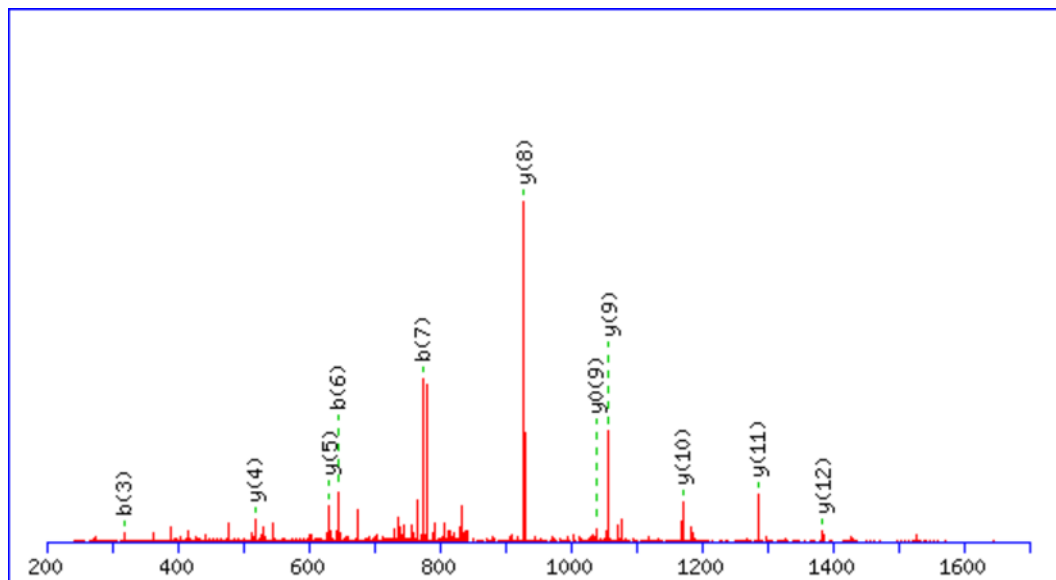

## Peptide View

MS/MS Fragmentation of **AQLDSADIPKAR**

Found in **IPI00026303**, Tax\_Id=9606 Gene\_Symbol=PI15 Peptidase inhibitor 15

**Experiment:** 24 - NOPC3 **Fraction:** NOPC3

Match to Query 7508: 1283.683848 from(642.849200,2+)

Title: OECHL100317\_25.8047.8047.2.dta

Data file \\Boromir\masse\Data LTQ-Orbitrap\Chrystelle Lacroix\Etude clinique sJPU\OECHL100317\_25.raw

**Monoisotopic mass of neutral peptide Mr(calc):** 1283.683334 **Fixed modifications:** Carbamidomethyl (C) (apply to specified residues or termini only) **Ions**

**Score:** 59 **Expect:** 9.3e-005 **Matches :** 16/114 fragment ions using 33 most intense peaks ([help](#))

| # | b                 | b <sup>++</sup> | b*         | b <sup>*++</sup> | b <sup>0</sup> | b <sup>0++</sup> | Seq. | y                  | y <sup>++</sup>   | y*                 | y <sup>*++</sup> | y <sup>0</sup>     | y <sup>0++</sup> |
|---|-------------------|-----------------|------------|------------------|----------------|------------------|------|--------------------|-------------------|--------------------|------------------|--------------------|------------------|
| 1 | 72.044390         | 36.525833       |            |                  |                |                  | A    |                    |                   |                    |                  |                    |                  |
| 2 | <b>200.102968</b> | 100.555122      | 183.076419 | 92.041848        |                |                  | Q    | 1213.653527        | 607.330402        | <b>1196.626978</b> | 598.817127       | 1195.642962        | 598.3251         |
| 3 | <b>313.187032</b> | 157.097154      | 296.160483 | 148.583879       |                |                  | L    | <b>1085.594949</b> | <b>543.301113</b> | 1068.568400        | 534.787838       | <b>1067.584384</b> | 534.2958         |
| 4 | 428.213975        | 214.610626      | 411.187426 | 206.097351       | 410.203410     | 205.605343       | D    | <b>972.510885</b>  | 486.759081        | 955.484336         | 478.245806       | 954.500320         | 477.7537         |
| 5 | 515.246003        | 258.126640      | 498.219454 | 249.613365       | 497.235438     | 249.121357       | S    | <b>857.483942</b>  | 429.245609        | 840.457393         | 420.732335       | 839.473377         | 420.2403         |

|    |             |            |             |            |             |            |   |            |            |            |            |            |          |
|----|-------------|------------|-------------|------------|-------------|------------|---|------------|------------|------------|------------|------------|----------|
| 6  | 586.283117  | 293.645197 | 569.256568  | 285.131922 | 568.272552  | 284.639914 | A | 770.451914 | 385.729595 | 753.425365 | 377.216321 | 752.441349 | 376.7243 |
| 7  | 701.310060  | 351.158668 | 684.283511  | 342.645394 | 683.299495  | 342.153386 | D | 699.414800 | 350.211038 | 682.388251 | 341.697764 | 681.404235 | 341.2057 |
| 8  | 814.394124  | 407.700700 | 797.367575  | 399.187426 | 796.383559  | 398.695418 | I | 584.387857 | 292.697567 | 567.361308 | 284.184292 |            |          |
| 9  | 911.446888  | 456.227082 | 894.420339  | 447.713808 | 893.436323  | 447.221800 | P | 471.303793 | 236.155535 | 454.277244 | 227.642260 |            |          |
| 10 | 1039.541851 | 520.274564 | 1022.515302 | 511.761289 | 1021.531286 | 511.269281 | K | 374.251029 | 187.629153 | 357.224480 | 179.115878 |            |          |
| 11 | 1110.578965 | 555.793121 | 1093.552416 | 547.279846 | 1092.568400 | 546.787838 | A | 246.156066 | 123.581671 | 229.129517 | 115.068396 |            |          |
| 12 |             |            |             |            |             |            | R | 175.118952 | 88.063114  | 158.092403 | 79.549839  |            |          |

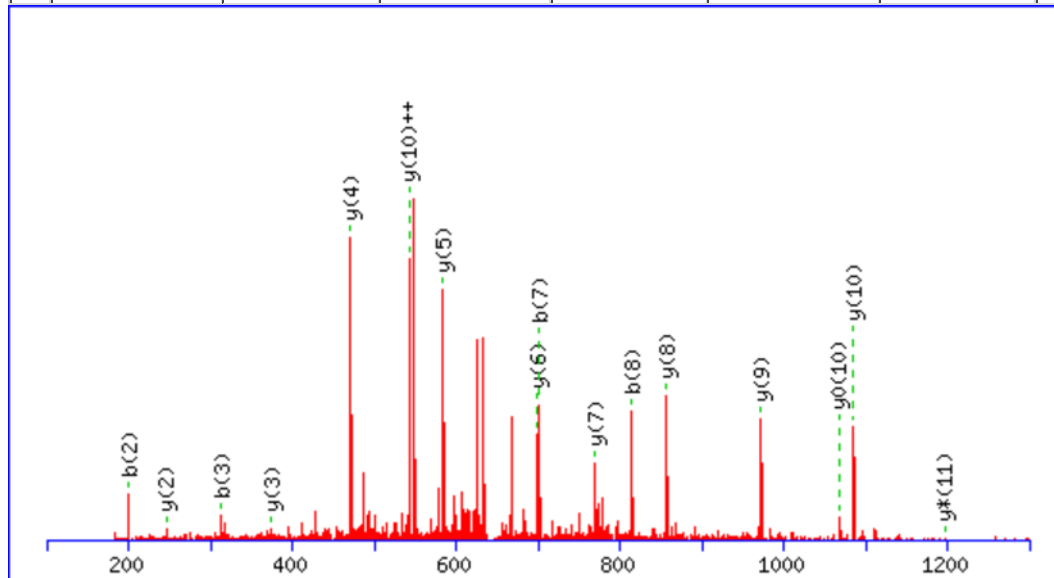

## Peptide View

MS/MS Fragmentation of **GSSWSADLDKCMDCASCR**

Found in **IPI00010277**, Tax\_Id=9606 Gene\_Symbol=TNFRSF12A Isoform 1 of Tumor necrosis factor receptor superfamily member 12A

Experiment: 24 - NOPC3 Fraction: NOPC3

Match to Query 14680: 2104.806972 from(702.609600,3+)

Title: OECHL100317\_25.14729.14729.3.dta

Data file \\Boromir\masse\Data LTQ-Orbitrap\Chrystelle Lacroix\Etude clinique sJPU\OECHL100317\_25.raw

**Monoisotopic mass of neutral peptide Mr(calc): 2104.807083** Fixed modifications: Carbamidomethyl (C) (apply to specified residues or termini only) Ions

Score: 55 Expect: 1.8e-005 Matches : 44/180 fragment ions using 93 most intense peaks ([help](#))

| #  | b           | b <sup>++</sup> | b*          | b <sup>*++</sup> | b <sup>0</sup> | b <sup>0++</sup> | Seq. | y           | y <sup>++</sup> | y*          | y <sup>*++</sup> | y <sup>0</sup> | y <sup>0</sup> |
|----|-------------|-----------------|-------------|------------------|----------------|------------------|------|-------------|-----------------|-------------|------------------|----------------|----------------|
| 1  | 58.028740   | 29.518008       |             |                  |                |                  | G    |             |                 |             |                  |                |                |
| 2  | 145.060768  | 73.034022       |             |                  | 127.050203     | 64.028740        | S    | 2048.792893 | 1024.900085     | 2031.766344 | 1016.386810      | 2030.782328    | 1015.8         |
| 3  | 232.092796  | 116.550036      |             |                  | 214.082231     | 107.544753       | S    | 1961.760865 | 981.384071      | 1944.734316 | 972.870796       | 1943.750300    | 972.3          |
| 4  | 418.172109  | 209.589693      |             |                  | 400.161544     | 200.584410       | W    | 1874.728837 | 937.868057      | 1857.702288 | 929.354782       | 1856.718272    | 928.8          |
| 5  | 505.204137  | 253.105707      |             |                  | 487.193572     | 244.100424       | S    | 1688.649524 | 844.828400      | 1671.622975 | 836.315126       | 1670.638959    | 835.8          |
| 6  | 576.241251  | 288.624264      |             |                  | 558.230686     | 279.618981       | A    | 1601.617496 | 801.312386      | 1584.590947 | 792.799112       | 1583.606931    | 792.3          |
| 7  | 691.268194  | 346.137735      |             |                  | 673.257629     | 337.132453       | D    | 1530.580382 | 765.793829      | 1513.553833 | 757.280555       | 1512.569817    | 756.7          |
| 8  | 804.352258  | 402.679767      |             |                  | 786.341693     | 393.674485       | L    | 1415.553439 | 708.280358      | 1398.526890 | 699.767083       | 1397.542874    | 699.2          |
| 9  | 919.379201  | 460.193239      |             |                  | 901.368636     | 451.187956       | D    | 1302.469375 | 651.738326      | 1285.442826 | 643.225051       | 1284.458810    | 642.7          |
| 10 | 1047.474164 | 524.240720      | 1030.447615 | 515.727446       | 1029.463599    | 515.235437       | K    | 1187.442432 | 594.224854      | 1170.415883 | 585.711580       | 1169.431867    | 585.2          |
| 11 | 1207.504813 | 604.256045      | 1190.478264 | 595.742770       | 1189.494248    | 595.250762       | C    | 1059.347469 | 530.177373      | 1042.320920 | 521.664098       | 1041.336904    | 521.1          |
| 12 | 1338.545298 | 669.776287      | 1321.518749 | 661.263013       | 1320.534733    | 660.771005       | M    | 899.316820  | 450.162048      | 882.290271  | 441.648774       | 881.306255     | 441.1          |
| 13 | 1453.572241 | 727.289759      | 1436.545692 | 718.776484       | 1435.561676    | 718.284476       | D    | 768.276335  | 384.641806      | 751.249786  | 376.128531       | 750.265770     | 375.6          |
| 14 | 1613.602890 | 807.305083      | 1596.576341 | 798.791809       | 1595.592325    | 798.299801       | C    | 653.249392  | 327.128334      | 636.222843  | 318.615060       | 635.238827     | 318.1          |
| 15 | 1684.640004 | 842.823640      | 1667.613455 | 834.310366       | 1666.629439    | 833.818358       | A    | 493.218743  | 247.113010      | 476.192194  | 238.599735       | 475.208178     | 238.1          |
| 16 | 1771.672032 | 886.339654      | 1754.645483 | 877.826380       | 1753.661467    | 877.334372       | S    | 422.181629  | 211.594453      | 405.155080  | 203.081178       | 404.171064     | 202.5          |
| 17 | 1931.702681 | 966.354979      | 1914.676132 | 957.841704       | 1913.692116    | 957.349696       | C    | 335.149601  | 168.078439      | 318.123052  | 159.565164       |                |                |
| 18 |             |                 |             |                  |                |                  | R    | 175.118952  | 88.063114       | 158.092403  | 79.549840        |                |                |

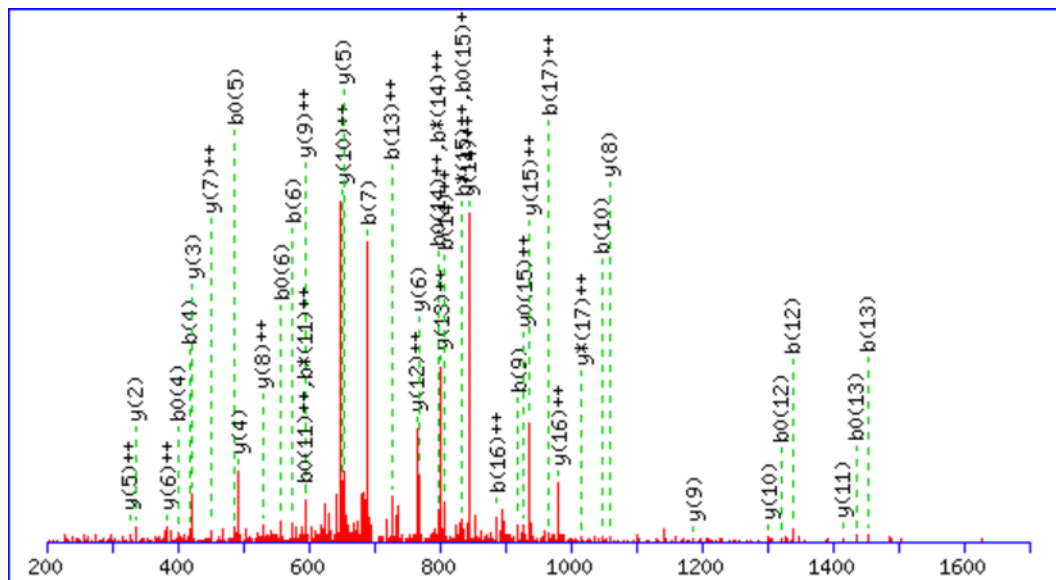

## Peptide View

MS/MS Fragmentation of **LSSGLVTAALYGR**

Found in **IPI00218413**, Tax\_Id=9606 Gene\_Symbol=BTD Biotinidase

**Experiment:** 24 - NOPC3 **Fraction:** NOPC3

Match to Query 7846: 1306.726248 from(654.370400,2+)

Title: OECHL100317\_25.17291.17291.2.dta

Data file \\Boromir\masse\Data LTQ-Orbitrap\Chrystelle Lacroix\Etude clinique sJPU\OECHL100317\_25.raw

**Monoisotopic mass of neutral peptide Mr(calc):** 1306.724487 **Fixed modifications:** Carbamidomethyl (C) (apply to specified residues or termini only) **Ions**

**Score:** 67 **Expect:** 9.7e-006 **Matches :** 21/106 fragment ions using 33 most intense peaks ([help](#))

| # | b                 | b <sup>++</sup> | b <sup>0</sup>    | b <sup>0++</sup> | Seq. | y                  | y <sup>++</sup> | y <sup>*</sup> | y <sup>*++</sup> | y <sup>0</sup> | y <sup>0++</sup> | #  |
|---|-------------------|-----------------|-------------------|------------------|------|--------------------|-----------------|----------------|------------------|----------------|------------------|----|
| 1 | 114.091340        | 57.549308       |                   |                  | L    |                    |                 |                |                  |                |                  | 13 |
| 2 | <b>201.123368</b> | 101.065322      | 183.112803        | 92.060039        | S    | <b>1194.647714</b> | 597.827495      | 1177.621165    | 589.314221       | 1176.637149    | 588.822212       | 12 |
| 3 | 288.155396        | 144.581336      | <b>270.144831</b> | 135.576053       | S    | <b>1107.615686</b> | 554.311481      | 1090.589137    | 545.798206       | 1089.605121    | 545.306198       | 11 |
| 4 | <b>345.176860</b> | 173.092068      | <b>327.166295</b> | 164.086785       | G    | <b>1020.583658</b> | 510.795467      | 1003.557109    | 502.282192       | 1002.573093    | 501.790184       | 10 |
| 5 | <b>458.260924</b> | 229.634100      | <b>440.250359</b> | 220.628817       | L    | <b>963.562194</b>  | 482.284735      | 946.535645     | 473.771460       | 945.551629     | 473.279452       | 9  |

|    |                    |            |                   |                   |   |                   |            |            |            |            |            |   |
|----|--------------------|------------|-------------------|-------------------|---|-------------------|------------|------------|------------|------------|------------|---|
| 6  | <b>557.329338</b>  | 279.168307 | 539.318773        | <b>270.163025</b> | V | <b>850.478130</b> | 425.742703 | 833.451581 | 417.229428 | 832.467565 | 416.737420 | 8 |
| 7  | 658.377017         | 329.692147 | 640.366452        | 320.686864        | T | <b>751.409716</b> | 376.208496 | 734.383167 | 367.695221 | 733.399151 | 367.203213 | 7 |
| 8  | 729.414131         | 365.210704 | 711.403566        | 356.205421        | A | 650.362037        | 325.684656 | 633.335488 | 317.171382 |            |            | 6 |
| 9  | 800.451245         | 400.729261 | 782.440680        | 391.723978        | A | <b>579.324923</b> | 290.166099 | 562.298374 | 281.652825 |            |            | 5 |
| 10 | <b>913.535309</b>  | 457.271293 | <b>895.524744</b> | 448.266010        | L | 508.287809        | 254.647542 | 491.261260 | 246.134268 |            |            | 4 |
| 11 | <b>1076.598638</b> | 538.802957 | 1058.588073       | 529.797674        | Y | <b>395.203745</b> | 198.105510 | 378.177196 | 189.592236 |            |            | 3 |
| 12 | <b>1133.620102</b> | 567.313689 | 1115.609537       | 558.308406        | G | <b>232.140416</b> | 116.573846 | 215.113867 | 108.060571 |            |            | 2 |
| 13 |                    |            |                   |                   | R | 175.118952        | 88.063114  | 158.092403 | 79.549839  |            |            | 1 |

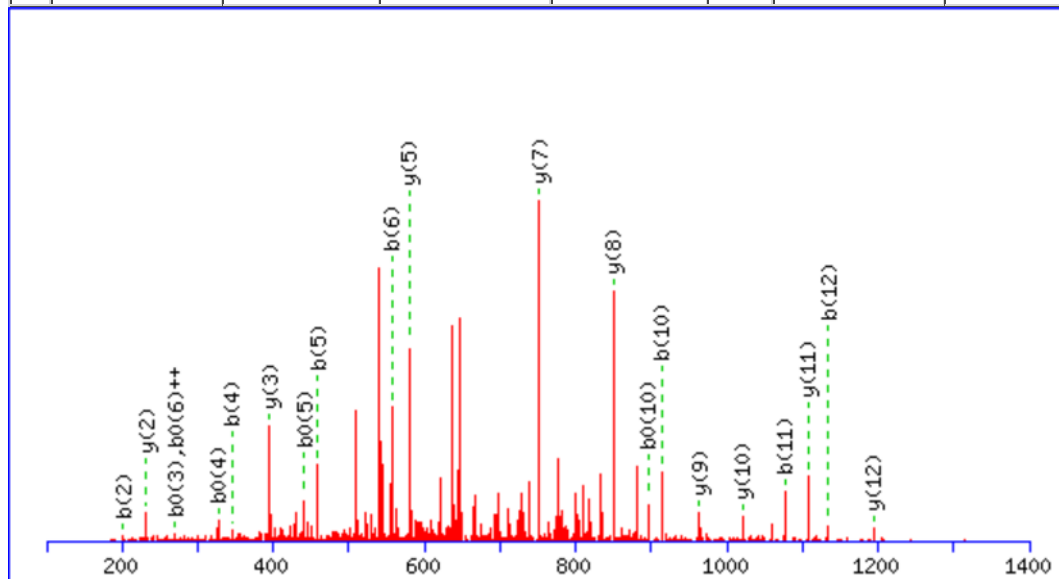

## Peptide View

MS/MS Fragmentation of **NPVLQQDAHSSVTITPQR**

Found in **IPI00410488**, Tax\_Id=9606 Gene\_Symbol=CD276 Isoform 1 of CD276 antigen

**Experiment: 24 - NOPC3 Fraction: NOPC3**

Match to Query 13948: 1990.021848 from(996.018200,2+)

Title: OECHL100317\_25.10015.10015.2.dta

Data file \\Boromir\masse\Data LTQ-Orbitrap\Chrystelle Lacroix\Etude clinique sJPU\OECHL100317\_25.raw

**Monoisotopic mass of neutral peptide Mr(cal):** 1990.023209**Fixed modifications:** Carbamidomethyl (C) (apply to specified residues or termini only)**Ions****Score:** 74 **Expect:** 5.9e-006**Matches :** 30/186 fragment ions using 48 most intense peaks ([help](#))

| #  | b           | b <sup>++</sup> | b*          | b* <sup>++</sup> | b <sup>0</sup> | b <sup>0++</sup> | Seq. | y           | y <sup>++</sup> | y*          | y* <sup>++</sup> | y <sup>0</sup> | y <sup>0++</sup> |
|----|-------------|-----------------|-------------|------------------|----------------|------------------|------|-------------|-----------------|-------------|------------------|----------------|------------------|
| 1  | 115.050203  | 58.028740       | 98.023654   | 49.515465        |                |                  | N    |             |                 |             |                  |                |                  |
| 2  | 212.102967  | 106.555121      | 195.076418  | 98.041847        |                |                  | P    | 1876.987553 | 938.997415      | 1859.961004 | 930.484140       | 1858.976988    | 929.9921         |
| 3  | 311.171381  | 156.089328      | 294.144832  | 147.576054       |                |                  | V    | 1779.934789 | 890.471033      | 1762.908240 | 881.957758       | 1761.924224    | 881.4657         |
| 4  | 424.255445  | 212.631361      | 407.228896  | 204.118086       |                |                  | L    | 1680.866375 | 840.936826      | 1663.839826 | 832.423551       | 1662.855810    | 831.9315         |
| 5  | 552.314023  | 276.660650      | 535.287474  | 268.147375       |                |                  | Q    | 1567.782311 | 784.394794      | 1550.755762 | 775.881519       | 1549.771746    | 775.3895         |
| 6  | 680.372601  | 340.689939      | 663.346052  | 332.176664       |                |                  | Q    | 1439.723733 | 720.365505      | 1422.697184 | 711.852230       | 1421.713168    | 711.3602         |
| 7  | 795.399544  | 398.203410      | 778.372995  | 389.690136       | 777.388979     | 389.198128       | D    | 1311.665155 | 656.336215      | 1294.638606 | 647.822941       | 1293.654590    | 647.3309         |
| 8  | 866.436658  | 433.721967      | 849.410109  | 425.208693       | 848.426093     | 424.716685       | A    | 1196.638212 | 598.822744      | 1179.611663 | 590.309470       | 1178.627647    | 589.8174         |
| 9  | 1003.495570 | 502.251423      | 986.469021  | 493.738149       | 985.485005     | 493.246141       | H    | 1125.601098 | 563.304187      | 1108.574549 | 554.790913       | 1107.590533    | 554.2989         |
| 10 | 1090.527598 | 545.767437      | 1073.501049 | 537.254163       | 1072.517033    | 536.762155       | S    | 988.542186  | 494.774731      | 971.515637  | 486.261457       | 970.531621     | 485.7694         |
| 11 | 1177.559626 | 589.283451      | 1160.533077 | 580.770177       | 1159.549061    | 580.278169       | S    | 901.510158  | 451.258717      | 884.483609  | 442.745443       | 883.499593     | 442.2534         |
| 12 | 1276.628040 | 638.817658      | 1259.601491 | 630.304384       | 1258.617475    | 629.812376       | V    | 814.478130  | 407.742703      | 797.451581  | 399.229428       | 796.467565     | 398.7374         |
| 13 | 1377.675719 | 689.341498      | 1360.649170 | 680.828223       | 1359.665154    | 680.336215       | T    | 715.409716  | 358.208496      | 698.383167  | 349.695221       | 697.399151     | 349.2032         |
| 14 | 1490.759783 | 745.883530      | 1473.733234 | 737.370255       | 1472.749218    | 736.878247       | I    | 614.362037  | 307.684656      | 597.335488  | 299.171382       | 596.351472     | 298.6793         |
| 15 | 1591.807462 | 796.407369      | 1574.780913 | 787.894095       | 1573.796897    | 787.402087       | T    | 501.277973  | 251.142624      | 484.251424  | 242.629350       | 483.267408     | 242.1373         |
| 16 | 1688.860226 | 844.933751      | 1671.833677 | 836.420477       | 1670.849661    | 835.928469       | P    | 400.230294  | 200.618785      | 383.203745  | 192.105510       |                |                  |
| 17 | 1816.918804 | 908.963040      | 1799.892255 | 900.449766       | 1798.908239    | 899.957758       | Q    | 303.177530  | 152.092403      | 286.150981  | 143.579128       |                |                  |
| 18 |             |                 |             |                  |                |                  | R    | 175.118952  | 88.063114       | 158.092403  | 79.549839        |                |                  |

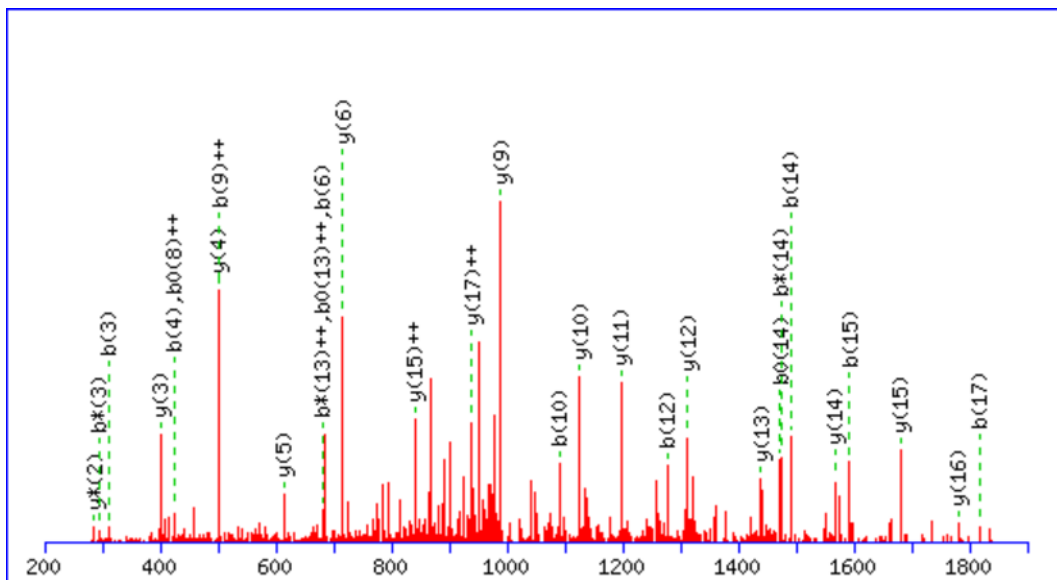

## Peptide View

MS/MS Fragmentation of **LLIYDASNLETGVPSR**

Found in **IPI00003111**, Tax\_Id=9606 Gene\_Symbol=LOC652694 Ig kappa chain V-I region AU

**Experiment:** 24 - NOPC3 **Fraction:** NOPC3

Match to Query 12232: 1746.916448 from(874.465500,2+)

Title: OECHL100317\_25.17184.17184.2.dta

Data file \\Boromir\masse\Data LTQ-Orbitrap\Chrystelle Lacroix\Etude clinique sJPU\OECHL100317\_25.raw

**Monoisotopic mass of neutral peptide Mr(calc):** 1746.915192 **Fixed modifications:** Carbamidomethyl (C) (apply to specified residues or termini only) **Ions**

**Score:** 77 **Expect:** 2.1e-006 **Matches :** 33/156 fragment ions using 60 most intense peaks ([help](#))

| # | b                 | b <sup>++</sup> | b <sup>*</sup> | b <sup>*++</sup> | b <sup>0</sup>    | b <sup>0++</sup> | Seq. | y                  | y <sup>++</sup>   | y <sup>*</sup>     | y <sup>*++</sup> | y <sup>0</sup>     | y <sup>0++</sup> |
|---|-------------------|-----------------|----------------|------------------|-------------------|------------------|------|--------------------|-------------------|--------------------|------------------|--------------------|------------------|
| 1 | 114.091340        | 57.549308       |                |                  |                   |                  | L    |                    |                   |                    |                  |                    |                  |
| 2 | 227.175404        | 114.091340      |                |                  |                   |                  | L    | 1634.838427        | 817.922852        | 1617.811878        | 809.409577       | 1616.827862        | 808.9175         |
| 3 | <b>340.259468</b> | 170.633372      |                |                  |                   |                  | I    | <b>1521.754363</b> | <b>761.380820</b> | 1504.727814        | 752.867545       | 1503.743798        | 752.3755         |
| 4 | <b>503.322797</b> | 252.165036      |                |                  |                   |                  | Y    | 1408.670299        | <b>704.838788</b> | <b>1391.643750</b> | 696.325513       | <b>1390.659734</b> | 695.8335         |
| 5 | <b>618.349740</b> | 309.678508      |                |                  | <b>600.339175</b> | 300.673226       | D    | <b>1245.606970</b> | 623.307123        | 1228.580421        | 614.793849       | 1227.596405        | 614.3018         |

|    |                    |                   |                    |            |                    |            |   |                    |            |                   |            |                   |          |
|----|--------------------|-------------------|--------------------|------------|--------------------|------------|---|--------------------|------------|-------------------|------------|-------------------|----------|
| 6  | <b>689.386854</b>  | 345.197065        |                    |            | 671.376289         | 336.191782 | A | <b>1130.580027</b> | 565.793652 | 1113.553478       | 557.280377 | 1112.569462       | 556.7883 |
| 7  | 776.418882         | 388.713079        |                    |            | 758.408317         | 379.707796 | S | <b>1059.542913</b> | 530.275095 | 1042.516364       | 521.761820 | 1041.532348       | 521.2698 |
| 8  | 890.461809         | 445.734542        | 873.435260         | 437.221268 | 872.451244         | 436.729260 | N | <b>972.510885</b>  | 486.759081 | 955.484336        | 478.245806 | 954.500320        | 477.7537 |
| 9  | <b>1003.545873</b> | 502.276574        | 986.519324         | 493.763300 | 985.535308         | 493.271292 | L | <b>858.467958</b>  | 429.737617 | 841.441409        | 421.224343 | 840.457393        | 420.7323 |
| 10 | <b>1132.588466</b> | 566.797871        | 1115.561917        | 558.284597 | 1114.577901        | 557.792588 | E | <b>745.383894</b>  | 373.195585 | 728.357345        | 364.682311 | 727.373329        | 364.1903 |
| 11 | <b>1233.636145</b> | <b>617.321710</b> | 1216.609596        | 608.808436 | 1215.625580        | 608.316428 | T | <b>616.341301</b>  | 308.674289 | 599.314752        | 300.161014 | 598.330736        | 299.6690 |
| 12 | <b>1290.657609</b> | 645.832442        | 1273.631060        | 637.319168 | <b>1272.647044</b> | 636.827160 | G | <b>515.293622</b>  | 258.150449 | 498.267073        | 249.637175 | 497.283057        | 249.1451 |
| 13 | <b>1389.726023</b> | 695.366649        | <b>1372.699474</b> | 686.853375 | 1371.715458        | 686.361367 | V | <b>458.272158</b>  | 229.639717 | 441.245609        | 221.126443 | 440.261593        | 220.6344 |
| 14 | <b>1486.778787</b> | 743.893032        | 1469.752238        | 735.379757 | 1468.768222        | 734.887749 | P | <b>359.203744</b>  | 180.105510 | <b>342.177195</b> | 171.592236 | <b>341.193179</b> | 171.1002 |
| 15 | <b>1573.810815</b> | 787.409046        | 1556.784266        | 778.895771 | <b>1555.800250</b> | 778.403763 | S | 262.150980         | 131.579128 | 245.124431        | 123.065854 | 244.140415        | 122.5738 |
| 16 |                    |                   |                    |            |                    |            | R | 175.118952         | 88.063114  | 158.092403        | 79.549839  |                   |          |

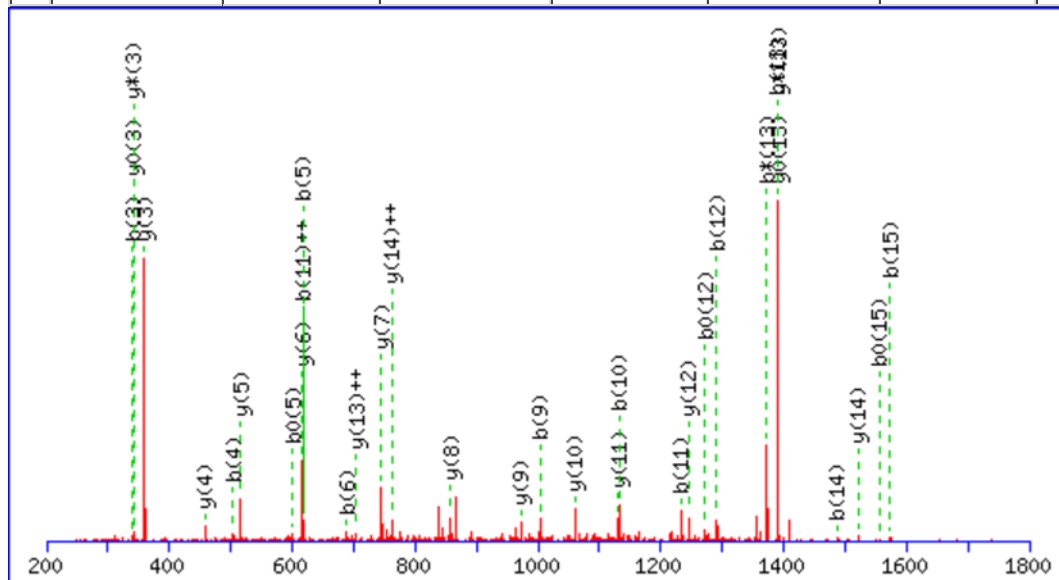

## Peptide View

MS/MS Fragmentation of **IQQLNSGTFAGLAK**

Found in **IPI00248596**, Tax\_Id=9606 Gene\_Symbol=ELFN1 extracellular leucine-rich repeat and fibronectin type III domain containing 1



**Experiment:** 24 - NOPC3 **Fraction:** NOPC3

Match to Query 9051: 1446.783848 from(724.399200,2+)

Title: OECHL100317\_25.15300.15300.2.dta

Data file \\Boromir\masse\Data LTQ-Orbitrap\Chrystelle Lacroix\Etude clinique sJPU\OECHL100317\_25.raw

**Monoisotopic mass of neutral peptide Mr(calc):** 1446.783066**Fixed modifications:** Carbamidomethyl (C) (apply to specified residues or termini only)**Ions****Score:** 81 **Expect:** 5e-007**Matches :** 38/132 fragment ions using 64 most intense peaks ([help](#))

| #  | <b>b</b>           | <b>b<sup>++</sup></b> | <b>b*</b>          | <b>b<sup>*++</sup></b> | <b>b<sup>0</sup></b> | <b>b<sup>0++</sup></b> | Seq. | <b>y</b>           | <b>y<sup>++</sup></b> | <b>y*</b>          | <b>y<sup>*++</sup></b> | <b>y<sup>0</sup></b> | <b>y<sup>0++</sup></b> |
|----|--------------------|-----------------------|--------------------|------------------------|----------------------|------------------------|------|--------------------|-----------------------|--------------------|------------------------|----------------------|------------------------|
| 1  | 114.091340         | 57.549308             |                    |                        |                      |                        | I    |                    |                       |                    |                        |                      |                        |
| 2  | <b>242.149918</b>  | 121.578597            | <b>225.123369</b>  | 113.065323             |                      |                        | Q    | <b>1334.706292</b> | <b>667.856784</b>     | 1317.679743        | 659.343510             | 1316.695727          | 658.8515               |
| 3  | <b>370.208496</b>  | 185.607886            | 353.181947         | 177.094612             |                      |                        | Q    | <b>1206.647714</b> | <b>603.827495</b>     | <b>1189.621165</b> | <b>595.314221</b>      | 1188.637149          | <b>594.8222</b>        |
| 4  | <b>483.292560</b>  | <b>242.149918</b>     | <b>466.266011</b>  | 233.636644             |                      |                        | L    | <b>1078.589136</b> | 539.798206            | <b>1061.562587</b> | 531.284931             | <b>1060.578571</b>   | 530.7929               |
| 5  | 597.335487         | 299.171382            | 580.308938         | 290.658107             |                      |                        | N    | <b>965.505072</b>  | <b>483.256174</b>     | 948.478523         | 474.742899             | 947.494507           | 474.2508               |
| 6  | <b>684.367515</b>  | 342.687396            | <b>667.340966</b>  | 334.174121             | <b>666.356950</b>    | 333.682113             | S    | <b>851.462145</b>  | 426.234711            | 834.435596         | 417.721436             | 833.451580           | 417.2294               |
| 7  | 741.388979         | 371.198128            | 724.362430         | 362.684853             | 723.378414           | 362.192845             | G    | <b>764.430117</b>  | 382.718697            | 747.403568         | 374.205422             | 746.419552           | 373.7134               |
| 8  | 842.436658         | 421.721967            | 825.410109         | 413.208693             | 824.426093           | 412.716685             | T    | <b>707.408653</b>  | 354.207965            | 690.382104         | 345.694690             | 689.398088           | 345.2026               |
| 9  | 989.505072         | 495.256174            | <b>972.478523</b>  | 486.742900             | 971.494507           | 486.250892             | F    | <b>606.360974</b>  | 303.684125            | 589.334425         | 295.170850             |                      |                        |
| 10 | <b>1060.542186</b> | 530.774731            | <b>1043.515637</b> | 522.261457             | 1042.531621          | 521.769449             | A    | <b>459.292560</b>  | 230.149918            | 442.266011         | 221.636643             |                      |                        |
| 11 | 1117.563650        | 559.285463            | 1100.537101        | 550.772189             | 1099.553085          | 550.280181             | G    | <b>388.255446</b>  | 194.631361            | 371.228897         | 186.118086             |                      |                        |
| 12 | <b>1230.647714</b> | 615.827495            | <b>1213.621165</b> | 607.314221             | 1212.637149          | <b>606.822212</b>      | L    | <b>331.233982</b>  | 166.120629            | 314.207433         | 157.607354             |                      |                        |
| 13 | <b>1301.684828</b> | 651.346052            | <b>1284.658279</b> | 642.832778             | <b>1283.674263</b>   | 642.340769             | A    | <b>218.149918</b>  | 109.578597            | 201.123369         | 101.065322             |                      |                        |
| 14 |                    |                       |                    |                        |                      |                        | K    | 147.112804         | 74.060040             | 130.086255         | 65.546765              |                      |                        |

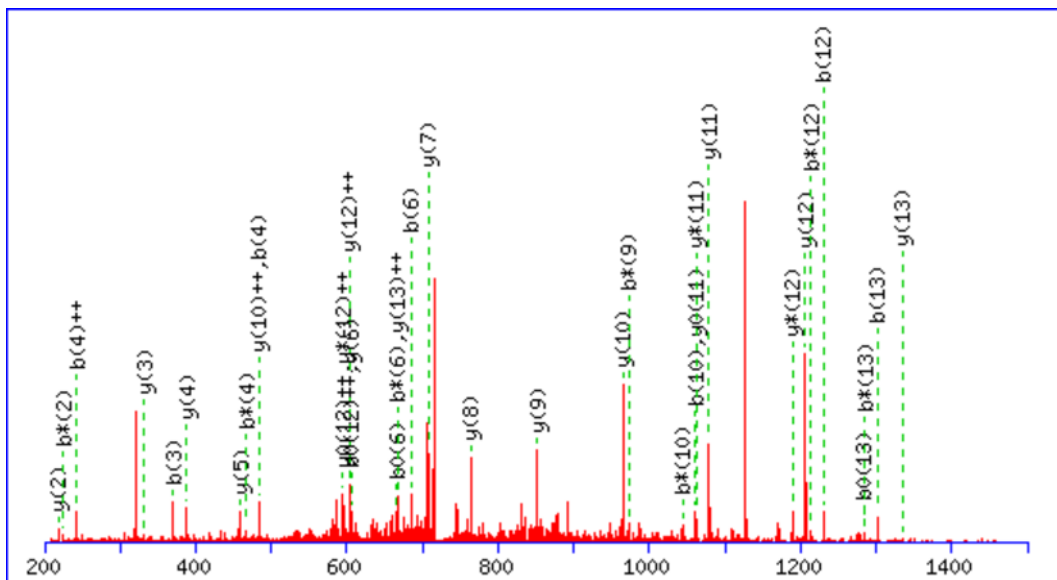

## Peptide View

MS/MS Fragmentation of **NIETIINTFHQYSVK**

Found in **IPI00027462**, Tax\_Id=9606 Gene\_Symbol=S100A9 Protein S100-A9

**Experiment:** 24 - NOPC3 **Fraction:** NOPC3

Match to Query 12687: 1805.933048 from(903.973800,2+)

Title: OECHL100317\_25.20144.20144.2.dta

Data file \\Boromir\masse\Data LTQ-Orbitrap\Chrystelle Lacroix\Etude clinique sJPU\OECHL100317\_25.raw

**Monoisotopic mass of neutral peptide Mr(calc):** 1805.931183 **Fixed modifications:** Carbamidomethyl (C) (apply to specified residues or termini only) **Ions**

**Score:** 71 **Expect:** 9.9e-006 **Matches :** 41/160 fragment ions using 48 most intense peaks ([help](#))

| # | b                 | b <sup>++</sup> | b <sup>*</sup>    | b <sup>*++</sup> | b <sup>0</sup>    | b <sup>0++</sup> | Seq. | y                  | y <sup>++</sup>   | y <sup>*</sup> | y <sup>*++</sup>  | y <sup>0</sup> | y <sup>0++</sup> |
|---|-------------------|-----------------|-------------------|------------------|-------------------|------------------|------|--------------------|-------------------|----------------|-------------------|----------------|------------------|
| 1 | 115.050203        | 58.028740       | 98.023654         | 49.515465        |                   |                  | N    |                    |                   |                |                   |                |                  |
| 2 | 228.134267        | 114.570771      | 211.107718        | 106.057497       |                   |                  | I    | <b>1692.895549</b> | 846.951413        | 1675.869000    | 838.438138        | 1674.884984    | 837.9461         |
| 3 | <b>357.176860</b> | 179.092068      | 340.150311        | 170.578793       | 339.166295        | 170.086785       | E    | <b>1579.811485</b> | <b>790.409381</b> | 1562.784936    | <b>781.896106</b> | 1561.800920    | <b>781.4040</b>  |
| 4 | <b>458.224539</b> | 229.615907      | <b>441.197990</b> | 221.102633       | <b>440.213974</b> | 220.610625       | T    | <b>1450.768892</b> | <b>725.888084</b> | 1433.742343    | 717.374810        | 1432.758327    | 716.8828         |
| 5 | <b>571.308603</b> | 286.157940      | <b>554.282054</b> | 277.644665       | <b>553.298038</b> | 277.152657       | I    | <b>1349.721213</b> | 675.364245        | 1332.694664    | <b>666.850970</b> | 1331.710648    | <b>666.3589</b>  |

|    |                    |                   |                    |                   |                   |                   |          |                    |            |                   |                   |             |                 |
|----|--------------------|-------------------|--------------------|-------------------|-------------------|-------------------|----------|--------------------|------------|-------------------|-------------------|-------------|-----------------|
| 6  | <b>684.392667</b>  | 342.699972        | 667.366118         | 334.186697        | <b>666.382102</b> | <b>333.694689</b> | <b>I</b> | <b>1236.637149</b> | 618.822213 | 1219.610600       | 610.308938        | 1218.626584 | 609.8169        |
| 7  | 798.435594         | 399.721435        | <b>781.409045</b>  | 391.208161        | 780.425029        | 390.716153        | <b>N</b> | <b>1123.553085</b> | 562.280181 | 1106.526536       | <b>553.766906</b> | 1105.542520 | <b>553.2748</b> |
| 8  | 899.483273         | 450.245275        | 882.456724         | <b>441.732000</b> | 881.472708        | <b>441.239992</b> | <b>T</b> | <b>1009.510158</b> | 505.258717 | 992.483609        | <b>496.745443</b> | 991.499593  | <b>496.2534</b> |
| 9  | 1046.551687        | 523.779482        | 1029.525138        | 515.266207        | 1028.541122       | 514.774199        | <b>F</b> | 908.462479         | 454.734878 | 891.435930        | 446.221603        | 890.451914  | 445.7295        |
| 10 | <b>1183.610599</b> | 592.308938        | 1166.584050        | 583.795663        | 1165.600034       | 583.303655        | <b>H</b> | <b>761.394065</b>  | 381.200671 | 744.367516        | 372.687396        | 743.383500  | 372.1953        |
| 11 | <b>1311.669177</b> | 656.338227        | 1294.642628        | 647.824952        | 1293.658612       | 647.332944        | <b>Q</b> | <b>624.335153</b>  | 312.671215 | <b>607.308604</b> | 304.157940        | 606.324588  | 303.6659        |
| 12 | <b>1474.732506</b> | 737.869891        | 1457.705957        | 729.356617        | 1456.721941       | 728.864609        | <b>Y</b> | <b>496.276575</b>  | 248.641926 | 479.250026        | 240.128651        | 478.266010  | 239.6366        |
| 13 | 1561.764534        | <b>781.385905</b> | 1544.737985        | 772.872631        | 1543.753969       | 772.380623        | <b>S</b> | <b>333.213246</b>  | 167.110261 | 316.186697        | 158.596987        | 315.202681  | 158.1049        |
| 14 | <b>1660.832948</b> | 830.920112        | <b>1643.806399</b> | 822.406838        | 1642.822383       | 821.914830        | <b>V</b> | 246.181218         | 123.594247 | 229.154669        | 115.080973        |             |                 |
| 15 |                    |                   |                    |                   |                   |                   | <b>K</b> | 147.112804         | 74.060040  | 130.086255        | 65.546765         |             |                 |

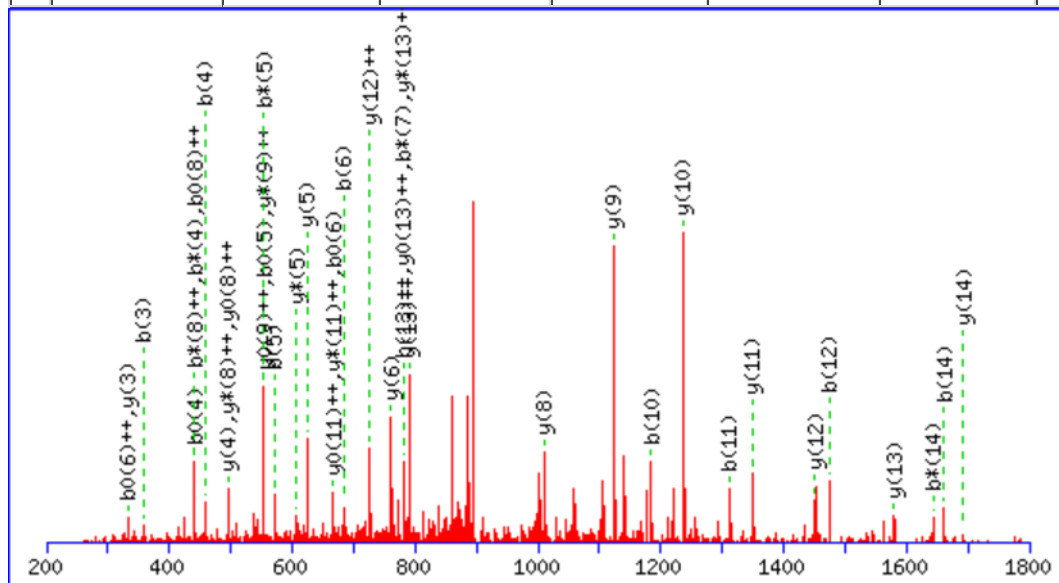

## Peptide View

MS/MS Fragmentation of **LEDLENQLANQK**

Found in **IPI00012325**, Tax\_Id=9606 Gene\_Symbol=MATN4 matrilin 4 isoform 3 precursor

Experiment: 24 - NOPC3 Fraction: NOPC3

Match to Query 8755: 1413.711048 from(707.862800,2+)

Title: OECHL100317\_25.11967.11967.2.dta

Data file \\Boromir\masse\Data LTQ-Orbitrap\Chrystelle Lacroix\Etude clinique sJPU\OECHL100317\_25.raw

**Monoisotopic mass of neutral peptide Mr(calc):** 1413.709930**Fixed modifications:** Carbamidomethyl (C) (apply to specified residues or termini only)**Ions****Score:** 66 **Expect:** 3.1e-005**Matches :** 32/106 fragment ions using 60 most intense peaks ([help](#))

| #  | b                  | b <sup>++</sup> | b*                 | b* <sup>++</sup> | b <sup>0</sup>    | b <sup>0++</sup> | Seq. | y                  | y <sup>++</sup>   | y*                | y* <sup>++</sup> | y <sup>0</sup> | y <sup>0++</sup> |
|----|--------------------|-----------------|--------------------|------------------|-------------------|------------------|------|--------------------|-------------------|-------------------|------------------|----------------|------------------|
| 1  | 114.091340         | 57.549308       |                    |                  |                   |                  | L    |                    |                   |                   |                  |                |                  |
| 2  | <b>243.133933</b>  | 122.070605      |                    |                  | 225.123368        | 113.065322       | E    | <b>1301.633185</b> | 651.320231        | 1284.606636       | 642.806956       | 1283.622620    | 642.3149         |
| 3  | <b>358.160876</b>  | 179.584076      |                    |                  | 340.150311        | 170.578794       | D    | <b>1172.590592</b> | <b>586.798934</b> | 1155.564043       | 578.285660       | 1154.580027    | 577.7936         |
| 4  | <b>471.244940</b>  | 236.126108      |                    |                  | 453.234375        | 227.120826       | L    | <b>1057.563649</b> | 529.285462        | 1040.537100       | 520.772188       | 1039.553084    | 520.2801         |
| 5  | <b>600.287533</b>  | 300.647405      |                    |                  | <b>582.276968</b> | 291.642122       | E    | <b>944.479585</b>  | 472.743431        | <b>927.453036</b> | 464.230156       | 926.469020     | <b>463.7381</b>  |
| 6  | 714.330460         | 357.668868      | 697.303911         | 349.155594       | 696.319895        | 348.663586       | N    | <b>815.436992</b>  | 408.222134        | <b>798.410443</b> | 399.708859       |                |                  |
| 7  | <b>842.389038</b>  | 421.698157      | <b>825.362489</b>  | 413.184883       | <b>824.378473</b> | 412.692875       | Q    | <b>701.394065</b>  | 351.200671        | 684.367516        | 342.687396       |                |                  |
| 8  | <b>955.473102</b>  | 478.240189      | <b>938.446553</b>  | 469.726915       | 937.462537        | 469.234907       | L    | <b>573.335487</b>  | 287.171382        | 556.308938        | 278.658107       |                |                  |
| 9  | <b>1026.510216</b> | 513.758746      | <b>1009.483667</b> | 505.245472       | 1008.499651       | 504.753464       | A    | <b>460.251423</b>  | 230.629349        | <b>443.224874</b> | 222.116075       |                |                  |
| 10 | <b>1140.553143</b> | 570.780210      | 1123.526594        | 562.266935       | 1122.542578       | 561.774927       | N    | <b>389.214309</b>  | 195.110792        | <b>372.187760</b> | 186.597518       |                |                  |
| 11 | <b>1268.611721</b> | 634.809499      | <b>1251.585172</b> | 626.296224       | 1250.601156       | 625.804216       | Q    | <b>275.171382</b>  | 138.089329        | <b>258.144833</b> | 129.576054       |                |                  |
| 12 |                    |                 |                    |                  |                   |                  | K    | 147.112804         | 74.060040         | 130.086255        | 65.546765        |                |                  |

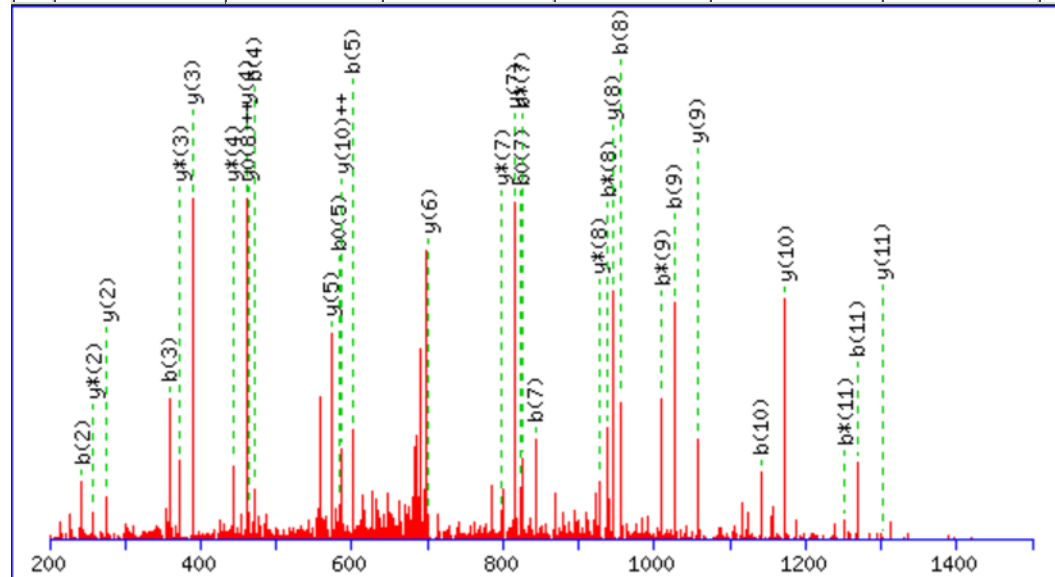

## Peptide View

MS/MS Fragmentation of **CQCPAGAALQADGR**

Found in **IPI00010737**, Tax\_Id=9606 Gene\_Symbol=THBD Thrombomodulin

Experiment: 24 - NOPC3 Fraction: NOPC3

Match to Query 9262: 1473.646248 from(737.830400,2+)

Title: OECHL100317\_25.7743.7743.2.dta

Data file \\Boromir\masse\Data LTQ-Orbitrap\Chrystelle Lacroix\Etude clinique sJPU\OECHL100317\_25.raw

**Monoisotopic mass of neutral peptide Mr(calc):** 1473.645279**Fixed modifications:** Carbamidomethyl (C) (apply to specified residues or termini only)**Ions**

**Score:** 65 **Expect:** 1.6e-005**Matches :** 21/128 fragment ions using 38 most intense peaks ([help](#))

| #  | b                  | b <sup>++</sup> | b <sup>*</sup>    | b <sup>*++</sup> | b <sup>0</sup> | b <sup>0++</sup> | Seq. | y                  | y <sup>++</sup>   | y <sup>*</sup> | y <sup>*++</sup> | y <sup>0</sup> | y <sup>0++</sup> |
|----|--------------------|-----------------|-------------------|------------------|----------------|------------------|------|--------------------|-------------------|----------------|------------------|----------------|------------------|
| 1  | 161.037925         | 81.022600       |                   |                  |                |                  | C    |                    |                   |                |                  |                |                  |
| 2  | <b>289.096503</b>  | 145.051890      | <b>272.069954</b> | 136.538615       |                |                  | Q    | 1314.621912        | 657.814594        | 1297.595363    | 649.301320       | 1296.611347    | 648.8093         |
| 3  | <b>449.127152</b>  | 225.067214      | 432.100603        | 216.553940       |                |                  | C    | <b>1186.563334</b> | <b>593.785305</b> | 1169.536785    | 585.272031       | 1168.552769    | 584.7800         |
| 4  | <b>546.179916</b>  | 273.593596      | 529.153367        | 265.080322       |                |                  | P    | <b>1026.532685</b> | 513.769981        | 1009.506136    | 505.256706       | 1008.522120    | 504.7646         |
| 5  | <b>617.217030</b>  | 309.112153      | 600.190481        | 300.598879       |                |                  | A    | <b>929.479921</b>  | 465.243599        | 912.453372     | 456.730324       | 911.469356     | 456.2383         |
| 6  | <b>674.238494</b>  | 337.622885      | 657.211945        | 329.109611       |                |                  | G    | <b>858.442807</b>  | 429.725042        | 841.416258     | 421.211767       | 840.432242     | 420.7197         |
| 7  | 745.275608         | 373.141442      | 728.249059        | 364.628168       |                |                  | A    | <b>801.421343</b>  | 401.214310        | 784.394794     | 392.701035       | 783.410778     | 392.2090         |
| 8  | <b>816.312722</b>  | 408.659999      | 799.286173        | 400.146725       |                |                  | A    | <b>730.384229</b>  | 365.695753        | 713.357680     | 357.182478       | 712.373664     | 356.6904         |
| 9  | <b>929.396786</b>  | 465.202031      | 912.370237        | 456.688757       |                |                  | L    | <b>659.347115</b>  | 330.177196        | 642.320566     | 321.663921       | 641.336550     | 321.1719         |
| 10 | <b>1057.455364</b> | 529.231320      | 1040.428815       | 520.718046       |                |                  | Q    | <b>546.263051</b>  | 273.635164        | 529.236502     | 265.121889       | 528.252486     | 264.6298         |
| 11 | 1128.492478        | 564.749877      | 1111.465929       | 556.236603       |                |                  | A    | 418.204473         | 209.605874        | 401.177924     | 201.092600       | 400.193908     | 200.6005         |
| 12 | <b>1243.519421</b> | 622.263349      | 1226.492872       | 613.750074       | 1225.508856    | 613.258066       | D    | 347.167359         | 174.087317        | 330.140810     | 165.574043       | 329.156794     | 165.0820         |
| 13 | <b>1300.540885</b> | 650.774081      | 1283.514336       | 642.260806       | 1282.530320    | 641.768798       | G    | <b>232.140416</b>  | 116.573846        | 215.113867     | 108.060571       |                |                  |
| 14 |                    |                 |                   |                  |                |                  | R    | 175.118952         | 88.063114         | 158.092403     | 79.549839        |                |                  |

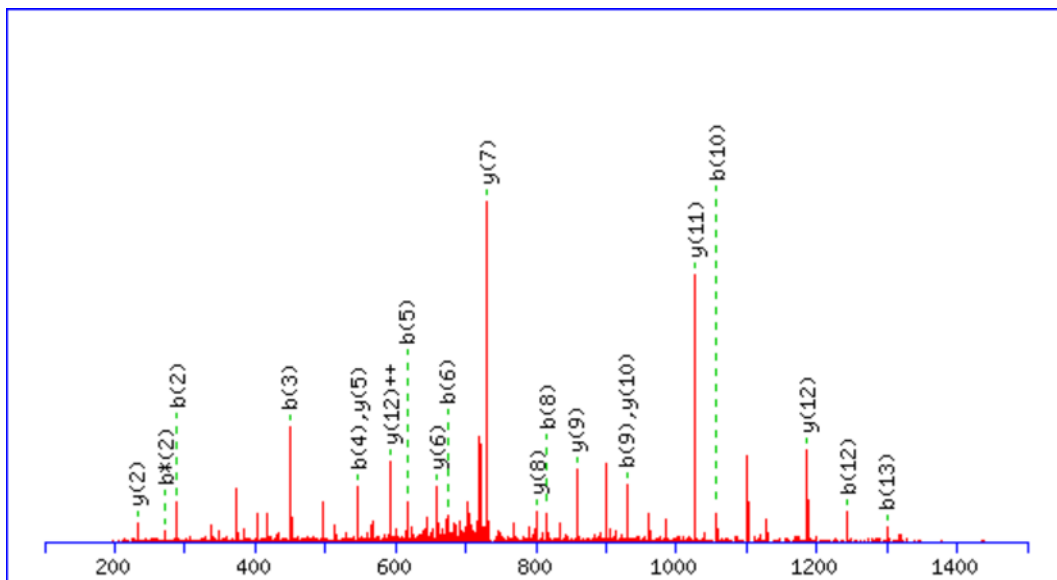

## Peptide View

MS/MS Fragmentation of **KTIADCGQLE**

Found in **IPI00419585**, Tax\_Id=9606 Gene\_Symbol=PPIA Peptidyl-prolyl cis-trans isomerase A

**Experiment:** 24 - NOPC3 **Fraction:** NOPC3

Match to Query 7093: 1246.622648 from(624.318600,2+)

Title: OECHL100317\_25.11401.11401.2.dta

Data file \\Boromir\masse\Data LTQ-Orbitrap\Chrystelle Lacroix\Etude clinique sJPU\OECHL100317\_25.raw

**Monoisotopic mass of neutral peptide Mr(calc):** 1246.622726 **Fixed modifications:** Carbamidomethyl (C) (apply to specified residues or termini only) **Ions**

**Score:** 51 **Expect:** 0.00098 **Matches :** 28/112 fragment ions using 55 most intense peaks ([help](#))

| # | b                 | b <sup>++</sup> | b*         | b <sup>*++</sup> | b <sup>0</sup>    | b <sup>0++</sup> | Seq.     | y                  | y <sup>++</sup> | y*                 | y <sup>*++</sup> | y <sup>0</sup>     | y <sup>0++</sup> |
|---|-------------------|-----------------|------------|------------------|-------------------|------------------|----------|--------------------|-----------------|--------------------|------------------|--------------------|------------------|
| 1 | 129.102239        | 65.054757       | 112.075690 | 56.541483        |                   |                  | <b>K</b> |                    |                 |                    |                  |                    |                  |
| 2 | <b>242.186303</b> | 121.596790      | 225.159754 | 113.083515       |                   |                  | <b>I</b> | 1119.535053        | 560.271165      | <b>1102.508504</b> | 551.757890       | <b>1101.524488</b> | <b>551.2658</b>  |
| 3 | <b>343.233982</b> | 172.120629      | 326.207433 | 163.607355       | 325.223417        | 163.115347       | <b>T</b> | <b>1006.450989</b> | 503.729133      | 989.424440         | 495.215858       | <b>988.440424</b>  | <b>494.7238</b>  |
| 4 | <b>456.318046</b> | 228.662661      | 439.291497 | 220.149387       | <b>438.307481</b> | 219.657379       | <b>I</b> | <b>905.403310</b>  | 453.205293      | 888.376761         | 444.692019       | 887.392745         | 444.2000         |
| 5 | <b>527.355160</b> | 264.181218      | 510.328611 | 255.667944       | 509.344595        | 255.175936       | <b>A</b> | <b>792.319246</b>  | 396.663261      | 775.292697         | 388.149987       | 774.308681         | 387.6579         |

|    |                    |                   |                    |                   |                   |                   |          |                   |            |            |            |            |          |
|----|--------------------|-------------------|--------------------|-------------------|-------------------|-------------------|----------|-------------------|------------|------------|------------|------------|----------|
| 6  | <b>642.382103</b>  | 321.694690        | 625.355554         | 313.181415        | 624.371538        | 312.689407        | <b>D</b> | <b>721.282132</b> | 361.144704 | 704.255583 | 352.631430 | 703.271567 | 352.1394 |
| 7  | <b>802.412752</b>  | 401.710014        | 785.386203         | 393.196740        | 784.402187        | 392.704732        | <b>C</b> | <b>606.255189</b> | 303.631233 | 589.228640 | 295.117958 | 588.244624 | 294.6259 |
| 8  | <b>859.434216</b>  | 430.220746        | 842.407667         | 421.707472        | 841.423651        | 421.215464        | <b>G</b> | <b>446.224540</b> | 223.615908 | 429.197991 | 215.102634 | 428.213975 | 214.6106 |
| 9  | <b>987.492794</b>  | <b>494.250035</b> | 970.466245         | 485.736761        | <b>969.482229</b> | 485.244753        | <b>Q</b> | 389.203076        | 195.105176 | 372.176527 | 186.591902 | 371.192511 | 186.0998 |
| 10 | <b>1100.576858</b> | <b>550.792067</b> | <b>1083.550309</b> | <b>542.278793</b> | 1082.566293       | <b>541.786785</b> | <b>L</b> | <b>261.144498</b> | 131.075887 |            |            | 243.133933 | 122.0706 |
| 11 |                    |                   |                    |                   |                   |                   | <b>E</b> | 148.060434        | 74.533855  |            |            | 130.049869 | 65.5285  |

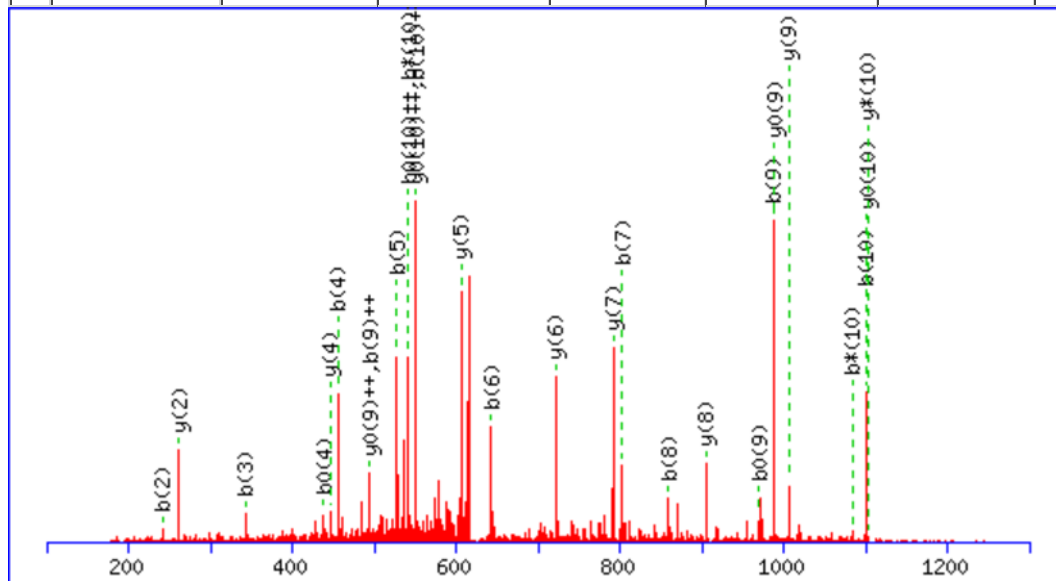

## Peptide View

MS/MS Fragmentation of **RGVSQAPTAAR**

Found in **IPI00025365**, Tax\_Id=9606 Gene\_Symbol=EDN3 Isoform Long of Endothelin-3

**Experiment:** 24 - NOPC3 **Fraction:** NOPC3

Match to Query 5014: 1112.604048 from(557.309300,2+)

Title: OECHL100317\_25.2431.2431.2.dta

Data file \\Boromir\masse\Data LTQ-Orbitrap\Chrystelle Lacroix\Etude clinique sJPU\OECHL100317\_25.raw

**Monoisotopic mass of neutral peptide Mr(calc):** 1112.605042 **Fixed modifications:** Carbamidomethyl (C) (apply to specified residues or termini only) **Ions**

**Score:** 56 **Expect:** 0.00019 **Matches :** 32/108 fragment ions using 45 most intense peaks ([help](#))

| #  | <b>b</b>   | <b>b<sup>++</sup></b> | <b>b<sup>*</sup></b> | <b>b<sup>*++</sup></b> | <b>b<sup>0</sup></b> | <b>b<sup>0++</sup></b> | Seq.     | <b>y</b>   | <b>y<sup>++</sup></b> | <b>y<sup>*</sup></b> | <b>y<sup>*++</sup></b> | <b>y<sup>0</sup></b> | <b>y<sup>0++</sup></b> | #         |
|----|------------|-----------------------|----------------------|------------------------|----------------------|------------------------|----------|------------|-----------------------|----------------------|------------------------|----------------------|------------------------|-----------|
| 1  | 157.108387 | 79.057831             | 140.081838           | 70.544557              |                      |                        | <b>R</b> |            |                       |                      |                        |                      |                        | <b>11</b> |
| 2  | 214.129851 | 107.568564            | 197.103302           | 99.055289              |                      |                        | <b>G</b> | 957.511221 | 479.259249            | 940.484672           | 470.745974             | 939.500656           | 470.253966             | <b>10</b> |
| 3  | 313.198265 | 157.102770            | 296.171716           | 148.589496             |                      |                        | <b>V</b> | 900.489757 | 450.748517            | 883.463208           | 442.235242             | 882.479192           | 441.743234             | <b>9</b>  |
| 4  | 400.230293 | 200.618785            | 383.203744           | 192.105510             | 382.219728           | 191.613502             | <b>S</b> | 801.421343 | 401.214310            | 784.394794           | 392.701035             | 783.410778           | 392.209027             | <b>8</b>  |
| 5  | 528.288871 | 264.648074            | 511.262322           | 256.134799             | 510.278306           | 255.642791             | <b>Q</b> | 714.389315 | 357.698296            | 697.362766           | 349.185021             | 696.378750           | 348.693013             | <b>7</b>  |
| 6  | 599.325985 | 300.166631            | 582.299436           | 291.653356             | 581.315420           | 291.161348             | <b>A</b> | 586.330737 | 293.669007            | 569.304188           | 285.155732             | 568.320172           | 284.663724             | <b>6</b>  |
| 7  | 696.378749 | 348.693013            | 679.352200           | 340.179738             | 678.368184           | 339.687730             | <b>P</b> | 515.293623 | 258.150450            | 498.267074           | 249.637175             | 497.283058           | 249.145167             | <b>5</b>  |
| 8  | 797.426428 | 399.216852            | 780.399879           | 390.703578             | 779.415863           | 390.211570             | <b>T</b> | 418.240859 | 209.624068            | 401.214310           | 201.110793             | 400.230294           | 200.618785             | <b>4</b>  |
| 9  | 868.463542 | 434.735409            | 851.436993           | 426.222135             | 850.452977           | 425.730127             | <b>A</b> | 317.193180 | 159.100228            | 300.166631           | 150.586953             |                      |                        | <b>3</b>  |
| 10 | 939.500656 | 470.253966            | 922.474107           | 461.740692             | 921.490091           | 461.248684             | <b>A</b> | 246.156066 | 123.581671            | 229.129517           | 115.068397             |                      |                        | <b>2</b>  |
| 11 |            |                       |                      |                        |                      |                        | <b>R</b> | 175.118952 | 88.063114             | 158.092403           | 79.549840              |                      |                        | <b>1</b>  |

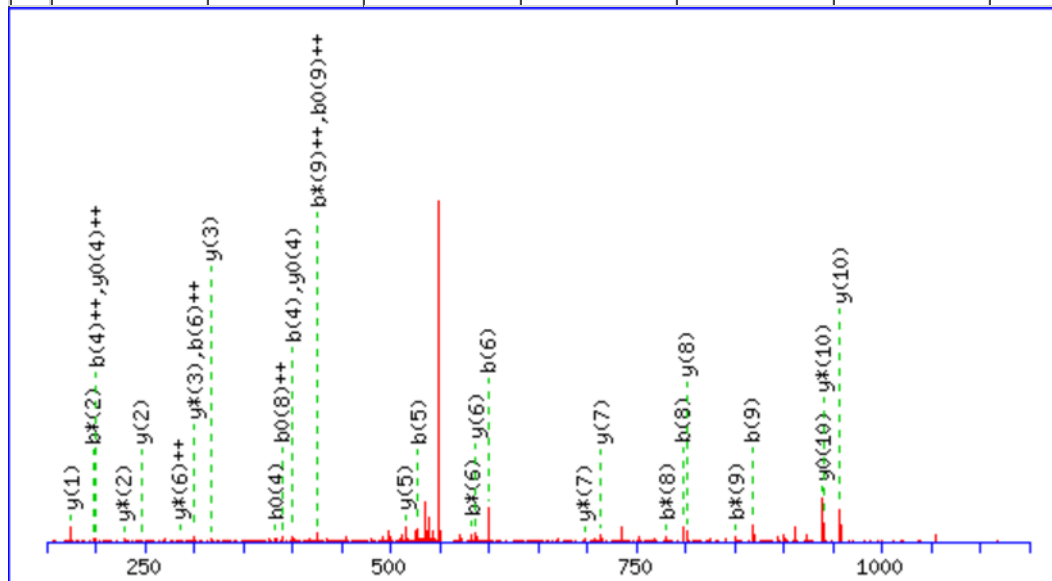

## Peptide View

MS/MS Fragmentation of **TGTLFMGR**



Found in **IPI00016150**, Tax\_Id=9606 Gene\_Symbol=SERPINI1 Neuroserpin

**Experiment:** 24 - NOPC3 **Fraction:** NOPC3

Match to Query 3420: 994.527448 from(498.271000,2+)

Title: OECHL100317\_25.16078.16078.2.dta

Data file \\Boromir\masse\Data LTQ-Orbitrap\Chrystelle Lacroix\Etude clinique sJPU\OECHL100317\_25.raw

**Monoisotopic mass of neutral peptide Mr(calc):** 994.526993 **Fixed modifications:** Carbamidomethyl (C) (apply to specified residues or termini only) **Ions Score:**

**58** **Expect:** 7.3e-005 **Matches :** 17/68 fragment ions using 35 most intense peaks ([help](#))

| # | b          | b <sup>++</sup> | b <sup>0</sup> | b <sup>0++</sup> | Seq. | y          | y <sup>++</sup> | y*         | y <sup>*++</sup> | y <sup>0</sup> | y <sup>0++</sup> | # |
|---|------------|-----------------|----------------|------------------|------|------------|-----------------|------------|------------------|----------------|------------------|---|
| 1 | 102.054955 | 51.531116       | 84.044390      | 42.525833        | T    |            |                 |            |                  |                |                  | 9 |
| 2 | 159.076419 | 80.041847       | 141.065854     | 71.036565        | G    | 894.486586 | 447.746931      | 877.460037 | 439.233657       | 876.476021     | 438.741649       | 8 |
| 3 | 260.124098 | 130.565687      | 242.113533     | 121.560405       | T    | 837.465122 | 419.236199      | 820.438573 | 410.722925       | 819.454557     | 410.230917       | 7 |
| 4 | 373.208162 | 187.107719      | 355.197597     | 178.102437       | I    | 736.417443 | 368.712360      | 719.390894 | 360.199085       |                |                  | 6 |
| 5 | 486.292226 | 243.649751      | 468.281661     | 234.644469       | L    | 623.333379 | 312.170328      | 606.306830 | 303.657053       |                |                  | 5 |
| 6 | 633.360640 | 317.183958      | 615.350075     | 308.178676       | F    | 510.249315 | 255.628296      | 493.222766 | 247.115021       |                |                  | 4 |
| 7 | 764.401125 | 382.704201      | 746.390560     | 373.698918       | M    | 363.180901 | 182.094089      | 346.154352 | 173.580814       |                |                  | 3 |
| 8 | 821.422589 | 411.214933      | 803.412024     | 402.209650       | G    | 232.140416 | 116.573846      | 215.113867 | 108.060572       |                |                  | 2 |
| 9 |            |                 |                |                  | R    | 175.118952 | 88.063114       | 158.092403 | 79.549840        |                |                  | 1 |

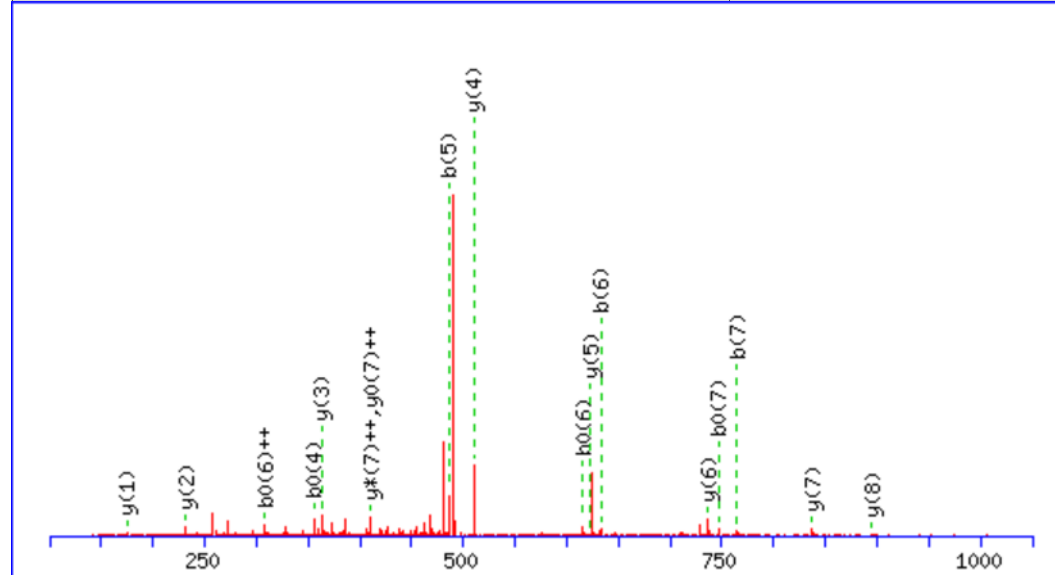

## Peptide View

MS/MS Fragmentation of **GAVSQTYPSGTCAYIQR**

Found in **IPI00001759**, Tax\_Id=9606 Gene\_Symbol=OLR1 Oxidized low-density lipoprotein receptor 1

**Experiment:** 24 - NOPC3 **Fraction:** NOPC3

Match to Query 13074: 1857.870848 from(929.942700,2+)

Title: OECHL100317\_25.11017.11017.2.dta

Data file \\Boromir\masse\Data LTQ-Orbitrap\Chrystelle Lacroix\Etude clinique sJPU\OECHL100317\_25.raw

**Monoisotopic mass of neutral peptide Mr(calc):** 1857.867950 **Fixed modifications:** Carbamidomethyl (C) (apply to specified residues or termini only) **Ions**

**Score:** 50 **Expect:** 0.0011 **Matches :** 27/166 fragment ions using 48 most intense peaks ([help](#))

| #  | b                  | b <sup>++</sup> | b <sup>*</sup>     | b <sup>*++</sup> | b <sup>0</sup>     | b <sup>0++</sup> | Seq.     | y                  | y <sup>++</sup>   | y <sup>*</sup> | y <sup>*++</sup>  | y <sup>0</sup>     | y <sup>0++</sup> |
|----|--------------------|-----------------|--------------------|------------------|--------------------|------------------|----------|--------------------|-------------------|----------------|-------------------|--------------------|------------------|
| 1  | 58.028740          | 29.518008       |                    |                  |                    |                  | <b>G</b> |                    |                   |                |                   |                    |                  |
| 2  | 129.065854         | 65.036565       |                    |                  |                    |                  | <b>A</b> | 1801.853763        | 901.430520        | 1784.827214    | 892.917245        | 1783.843198        | 892.4252         |
| 3  | 228.134268         | 114.570772      |                    |                  |                    |                  | <b>V</b> | 1730.816649        | <b>865.911963</b> | 1713.790100    | 857.398688        | 1712.806084        | 856.9066         |
| 4  | 315.166296         | 158.086786      |                    |                  | 297.155731         | 149.081504       | <b>S</b> | <b>1631.748235</b> | <b>816.377756</b> | 1614.721686    | 807.864481        | 1613.737670        | 807.3724         |
| 5  | 443.224874         | 222.116075      | 426.198325         | 213.602801       | 425.214309         | 213.110793       | <b>Q</b> | 1544.716207        | 772.861742        | 1527.689658    | 764.348467        | 1526.705642        | 763.8564         |
| 6  | <b>544.272553</b>  | 272.639915      | 527.246004         | 264.126640       | <b>526.261988</b>  | 263.634632       | <b>T</b> | <b>1416.657629</b> | 708.832453        | 1399.631080    | 700.319178        | 1398.647064        | 699.8271         |
| 7  | <b>707.335882</b>  | 354.171579      | <b>690.309333</b>  | 345.658305       | <b>689.325317</b>  | 345.166297       | <b>Y</b> | <b>1315.609950</b> | 658.308613        | 1298.583401    | 649.795339        | 1297.599385        | 649.3033         |
| 8  | 804.388646         | 402.697961      | 787.362097         | 394.184687       | 786.378081         | 393.692679       | <b>P</b> | <b>1152.546621</b> | 576.776949        | 1135.520072    | 568.263674        | <b>1134.536056</b> | 567.7716         |
| 9  | 891.420674         | 446.213975      | 874.394125         | 437.700701       | 873.410109         | 437.208693       | <b>S</b> | 1055.493857        | 528.250567        | 1038.467308    | 519.737292        | 1037.483292        | 519.2452         |
| 10 | 948.442138         | 474.724707      | 931.415589         | 466.211433       | 930.431573         | 465.719425       | <b>G</b> | 968.461829         | 484.734553        | 951.435280     | 476.221278        | 950.451264         | 475.7292         |
| 11 | 1049.489817        | 525.248547      | <b>1032.463268</b> | 516.735272       | <b>1031.479252</b> | 516.243264       | <b>T</b> | <b>911.440365</b>  | 456.223821        | 894.413816     | 447.710546        | 893.429800         | 447.2185         |
| 12 | 1209.520466        | 605.263871      | 1192.493917        | 596.750597       | 1191.509901        | 596.258589       | <b>C</b> | 810.392686         | 405.699981        | 793.366137     | <b>397.186707</b> |                    |                  |
| 13 | <b>1280.557580</b> | 640.782428      | 1263.531031        | 632.269154       | 1262.547015        | 631.777146       | <b>A</b> | <b>650.362037</b>  | 325.684657        | 633.335488     | 317.171382        |                    |                  |
| 14 | <b>1443.620909</b> | 722.314093      | 1426.594360        | 713.800818       | <b>1425.610344</b> | 713.308810       | <b>Y</b> | <b>579.324923</b>  | 290.166100        | 562.298374     | 281.652825        |                    |                  |
| 15 | <b>1556.704973</b> | 778.856125      | 1539.678424        | 770.342850       | <b>1538.694408</b> | 769.850842       | <b>I</b> | <b>416.261594</b>  | 208.634435        | 399.235045     | 200.121160        |                    |                  |
| 16 | <b>1684.763551</b> | 842.885414      | 1667.737002        | 834.372139       | <b>1666.752986</b> | 833.880131       | <b>Q</b> | <b>303.177530</b>  | 152.092403        | 286.150981     | 143.579129        |                    |                  |
| 17 |                    |                 |                    |                  |                    |                  | <b>R</b> | 175.118952         | 88.063114         | 158.092403     | 79.549839         |                    |                  |

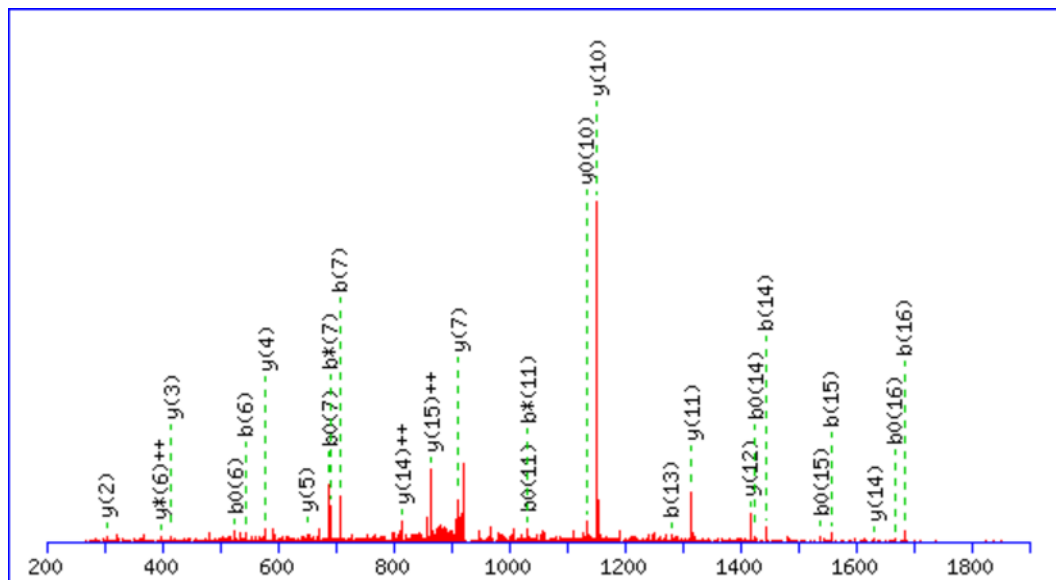

## Peptide View

MS/MS Fragmentation of **ASVGQDSPEPR**

Found in **IPI00044369**, Tax\_Id=9606 Gene\_Symbol=PLXDC2 Isoform 1 of Plexin domain-containing protein 2

**Experiment:** 15 - S\_E-3 **Fraction:** S\_E-3

Match to Query 5848: 1141.536448 from(571.775500,2+)

Title: OECHL100317\_23.3551.3551.2.dta

Data file \\Boromir\masse\Data LTQ-Orbitrap\Chrystelle Lacroix\Etude clinique sJPU\OECHL100317\_23.raw

**Monoisotopic mass of neutral peptide Mr(calc):** 1141.536362 **Fixed modifications:** Carbamidomethyl (C) (apply to specified residues or termini only) **Ions**

**Score:** 76 **Expect:** 1.5e-006 **Matches :** 18/106 fragment ions using 20 most intense peaks ([help](#))

| # | b                 | b <sup>++</sup> | b <sup>*</sup> | b <sup>*++</sup> | b <sup>0</sup>    | b <sup>0++</sup> | Seq. | y                  | y <sup>++</sup>   | y <sup>*</sup> | y <sup>*++</sup> | y <sup>0</sup> | y <sup>0++</sup> |
|---|-------------------|-----------------|----------------|------------------|-------------------|------------------|------|--------------------|-------------------|----------------|------------------|----------------|------------------|
| 1 | 72.044390         | 36.525833       |                |                  |                   |                  | A    |                    |                   |                |                  |                |                  |
| 2 | 159.076418        | 80.041847       |                |                  | 141.065853        | 71.036564        | S    | <b>1071.506528</b> | 536.256902        | 1054.479979    | 527.743628       | 1053.495963    | 527.251620       |
| 3 | 258.144832        | 129.576054      |                |                  | <b>240.134267</b> | 120.570772       | V    | <b>984.474500</b>  | <b>492.740888</b> | 967.447951     | 484.227614       | 966.463935     | 483.735606       |
| 4 | <b>315.166296</b> | 158.086786      |                |                  | 297.155731        | 149.081504       | G    | <b>885.406086</b>  | <b>443.206681</b> | 868.379537     | 434.693407       | 867.395521     | 434.201399       |
| 5 | <b>443.224874</b> | 222.116075      | 426.198325     | 213.602801       | 425.214309        | 213.110793       | Q    | <b>828.384622</b>  | <b>414.695949</b> | 811.358073     | 406.182675       | 810.374057     | 405.690667       |

|    |            |            |            |            |            |            |   |            |            |            |            |            |            |
|----|------------|------------|------------|------------|------------|------------|---|------------|------------|------------|------------|------------|------------|
| 6  | 558.251817 | 279.629547 | 541.225268 | 271.116272 | 540.241252 | 270.624264 | D | 700.326044 | 350.666660 | 683.299495 | 342.153386 | 682.315479 | 341.661378 |
| 7  | 645.283845 | 323.145561 | 628.257296 | 314.632286 | 627.273280 | 314.140278 | S | 585.299101 | 293.153189 | 568.272552 | 284.639914 | 567.288536 | 284.147906 |
| 8  | 742.336609 | 371.671943 | 725.310060 | 363.158668 | 724.326044 | 362.666660 | P | 498.267073 | 249.637174 | 481.240524 | 241.123900 | 480.256508 | 240.631892 |
| 9  | 871.379202 | 436.193239 | 854.352653 | 427.679965 | 853.368637 | 427.187957 | E | 401.214309 | 201.110792 | 384.187760 | 192.597518 | 383.203744 | 192.105510 |
| 10 | 968.431966 | 484.719621 | 951.405417 | 476.206347 | 950.421401 | 475.714339 | P | 272.171716 | 136.589496 | 255.145167 | 128.076221 |            |            |
| 11 |            |            |            |            |            |            | R | 175.118952 | 88.063114  | 158.092403 | 79.549839  |            |            |

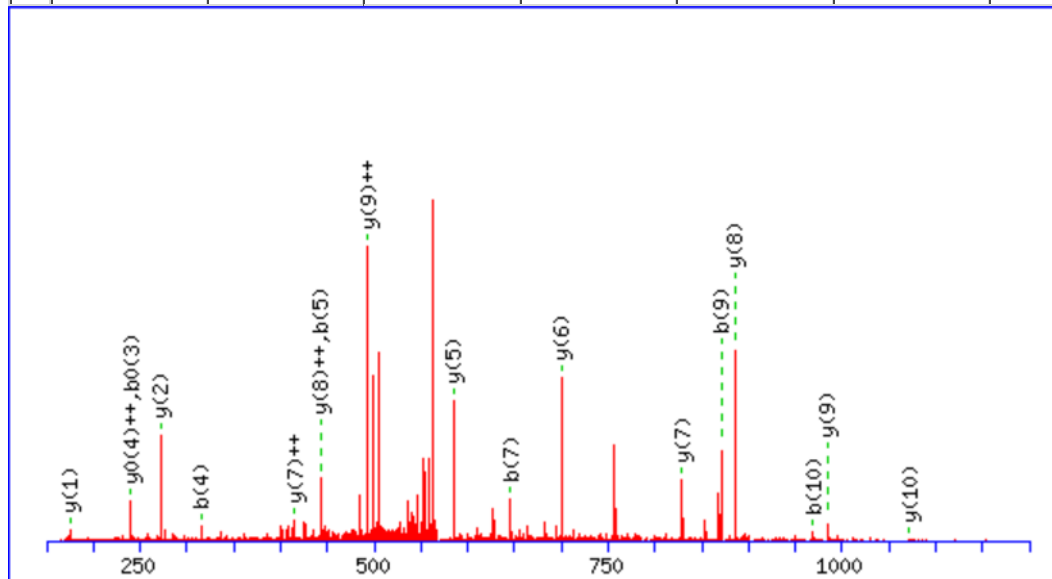

## Peptide View

MS/MS Fragmentation of **TVAGPVGGSLSVQCPYEKEHR**

Found in **IPI00414784**, Tax\_Id=9606 Gene\_Symbol=CD300A Isoform 1 of CMRF35-like molecule 8

Experiment: 15 - S\_E-3 Fraction: S\_E-3

Match to Query 15766: 2270.113448 from(1136.064000,2+)

Title: OECHL100317\_23.11185.11185.2.dta

Data file \\Boromir\masse\Data LTQ-Orbitrap\Chrystelle Lacroix\Etude clinique sJPU\OECHL100317\_23.raw

**Monoisotopic mass of neutral peptide Mr(calc): 2270.111374** Fixed modifications: Carbamidomethyl (C) (apply to specified residues or termini only) Ions

Score: 70 Expect: 1.8e-005 Matches : 20/212 fragment ions using 34 most intense peaks ([help](#))

| #  | b           | b <sup>++</sup> | b*          | b <sup>*++</sup> | b <sup>0</sup> | b <sup>0++</sup> | Seq. | y           | y <sup>++</sup> | y*          | y <sup>*++</sup> | y <sup>0</sup> |     |
|----|-------------|-----------------|-------------|------------------|----------------|------------------|------|-------------|-----------------|-------------|------------------|----------------|-----|
| 1  | 102.054955  | 51.531116       |             |                  | 84.044390      | 42.525833        | T    |             |                 |             |                  |                |     |
| 2  | 201.123369  | 101.065322      |             |                  | 183.112804     | 92.060040        | V    | 2170.070965 | 1085.539120     | 2153.044416 | 1077.025846      | 2152.060400    | 10' |
| 3  | 272.160483  | 136.583879      |             |                  | 254.149918     | 127.578597       | A    | 2071.002551 | 1036.004913     | 2053.976002 | 1027.491639      | 2052.991986    | 10' |
| 4  | 329.181947  | 165.094611      |             |                  | 311.171382     | 156.089329       | G    | 1999.965437 | 1000.486357     | 1982.938888 | 991.973082       | 1981.954872    | 9'  |
| 5  | 426.234711  | 213.620994      |             |                  | 408.224146     | 204.615711       | P    | 1942.943973 | 971.975625      | 1925.917424 | 963.462350       | 1924.933408    | 9'  |
| 6  | 525.303125  | 263.155201      |             |                  | 507.292560     | 254.149918       | V    | 1845.891209 | 923.449243      | 1828.864660 | 914.935968       | 1827.880644    | 9'  |
| 7  | 582.324589  | 291.665933      |             |                  | 564.314024     | 282.660650       | G    | 1746.822795 | 873.915036      | 1729.796246 | 865.401761       | 1728.812230    | 8'  |
| 8  | 639.346053  | 320.176665      |             |                  | 621.335488     | 311.171382       | G    | 1689.801331 | 845.404304      | 1672.774782 | 836.891029       | 1671.790766    | 8'  |
| 9  | 726.378081  | 363.692679      |             |                  | 708.367516     | 354.687396       | S    | 1632.779867 | 816.893572      | 1615.753318 | 808.380297       | 1614.769302    | 8'  |
| 10 | 839.462145  | 420.234711      |             |                  | 821.451580     | 411.229428       | L    | 1545.747839 | 773.377558      | 1528.721290 | 764.864283       | 1527.737274    | 7'  |
| 11 | 926.494173  | 463.750725      |             |                  | 908.483608     | 454.745442       | S    | 1432.663775 | 716.835526      | 1415.637226 | 708.322251       | 1414.653210    | 7'  |
| 12 | 1025.562587 | 513.284932      |             |                  | 1007.552022    | 504.279649       | V    | 1345.631747 | 673.319512      | 1328.605198 | 664.806237       | 1327.621182    | 6'  |
| 13 | 1153.621165 | 577.314221      | 1136.594616 | 568.800946       | 1135.610600    | 568.308938       | Q    | 1246.563333 | 623.785305      | 1229.536784 | 615.272030       | 1228.552768    | 6'  |
| 14 | 1313.651814 | 657.329545      | 1296.625265 | 648.816271       | 1295.641249    | 648.324263       | C    | 1118.504755 | 559.756016      | 1101.478206 | 551.242741       | 1100.494190    | 5'  |
| 15 | 1410.704578 | 705.855927      | 1393.678029 | 697.342653       | 1392.694013    | 696.850645       | P    | 958.474106  | 479.740691      | 941.447557  | 471.227417       | 940.463541     | 4'  |
| 16 | 1573.767907 | 787.387592      | 1556.741358 | 778.874317       | 1555.757342    | 778.382309       | Y    | 861.421342  | 431.214309      | 844.394793  | 422.701035       | 843.410777     | 4'  |
| 17 | 1702.810500 | 851.908888      | 1685.783951 | 843.395614       | 1684.799935    | 842.903606       | E    | 698.358013  | 349.682645      | 681.331464  | 341.169370       | 680.347448     | 3'  |
| 18 | 1830.905463 | 915.956370      | 1813.878914 | 907.443095       | 1812.894898    | 906.951087       | K    | 569.315420  | 285.161348      | 552.288871  | 276.648074       | 551.304855     | 2'  |
| 19 | 1959.948056 | 980.477666      | 1942.921507 | 971.964392       | 1941.937491    | 971.472384       | E    | 441.220457  | 221.113867      | 424.193908  | 212.600592       | 423.209892     | 2'  |
| 20 | 2097.006968 | 1049.007122     | 2079.980419 | 1040.493847      | 2078.996403    | 1040.001840      | H    | 312.177864  | 156.592570      | 295.151315  | 148.079295       |                |     |
| 21 |             |                 |             |                  |                |                  | R    | 175.118952  | 88.063114       | 158.092403  | 79.549839        |                |     |

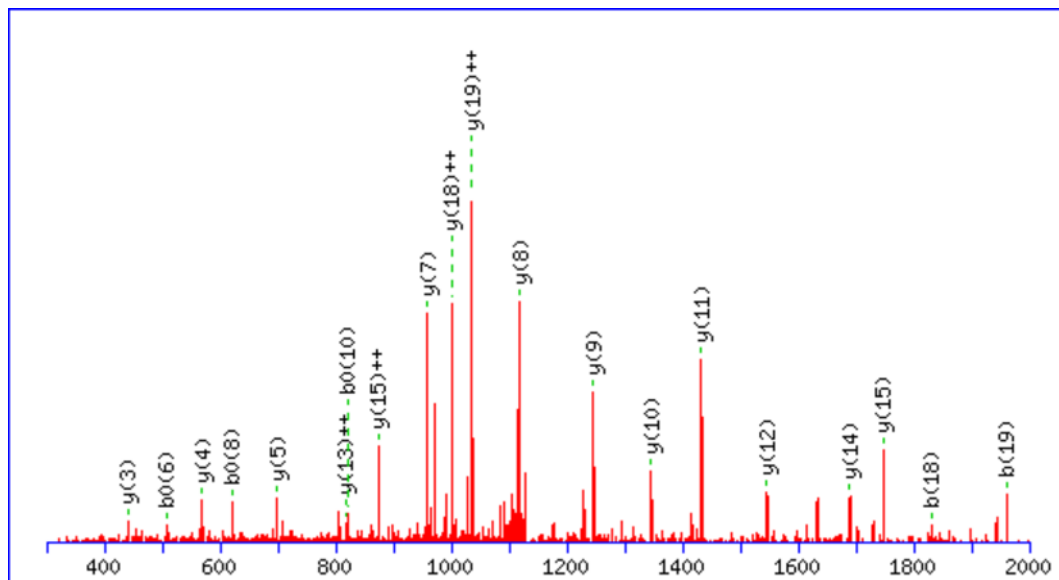

## Peptide View

MS/MS Fragmentation of **LLYDASNLETGVPSR**

Found in **IPI0003111**, Tax\_Id=9606 Gene\_Symbol=LOC652694 Ig kappa chain V-I region AU

**Experiment:** 15 - S\_E-3 **Fraction:** S\_E-3

Match to Query 13052: 1746.916048 from(874.465300,2+)

Title: OECHL100317\_23.17527.17527.2.dta

Data file \\Boromir\masse\Data LTQ-Orbitrap\Chrystelle Lacroix\Etude clinique sJPU\OECHL100317\_23.raw

**Monoisotopic mass of neutral peptide Mr(calc):** 1746.915192 **Fixed modifications:** Carbamidomethyl (C) (apply to specified residues or termini only) **Ions**

**Score:** 79 **Expect:** 1.4e-006 **Matches :** 29/156 fragment ions using 44 most intense peaks ([help](#))

| # | b                 | b <sup>++</sup> | b* | b* <sup>++</sup> | b <sup>0</sup> | b <sup>0++</sup> | Seq. | y                  | y <sup>++</sup>   | y*          | y* <sup>++</sup>  | y <sup>0</sup>     | y <sup>0++</sup> |
|---|-------------------|-----------------|----|------------------|----------------|------------------|------|--------------------|-------------------|-------------|-------------------|--------------------|------------------|
| 1 | 114.091340        | 57.549308       |    |                  |                |                  | L    |                    |                   |             |                   |                    |                  |
| 2 | 227.175404        | 114.091340      |    |                  |                |                  | L    | 1634.838427        | 817.922852        | 1617.811878 | 809.409577        | 1616.827862        | 808.9175         |
| 3 | 340.259468        | 170.633372      |    |                  |                |                  | I    | <b>1521.754363</b> | <b>761.380820</b> | 1504.727814 | 752.867545        | 1503.743798        | 752.3755         |
| 4 | 503.322797        | 252.165036      |    |                  |                |                  | Y    | 1408.670299        | 704.838788        | 1391.643750 | <b>696.325513</b> | <b>1390.659734</b> | <b>695.8335</b>  |
| 5 | <b>618.349740</b> | 309.678508      |    |                  | 600.339175     | 300.673226       | D    | <b>1245.606970</b> | 623.307123        | 1228.580421 | 614.793849        | 1227.596405        | 614.3018         |

|    |                    |                   |                    |            |                    |            |   |                    |            |             |            |                   |          |
|----|--------------------|-------------------|--------------------|------------|--------------------|------------|---|--------------------|------------|-------------|------------|-------------------|----------|
| 6  | 689.386854         | 345.197065        |                    |            | 671.376289         | 336.191782 | A | <b>1130.580027</b> | 565.793652 | 1113.553478 | 557.280377 | 1112.569462       | 556.7883 |
| 7  | 776.418882         | 388.713079        |                    |            | 758.408317         | 379.707796 | S | <b>1059.542913</b> | 530.275095 | 1042.516364 | 521.761820 | 1041.532348       | 521.2698 |
| 8  | 890.461809         | 445.734542        | <b>873.435260</b>  | 437.221268 | 872.451244         | 436.729260 | N | <b>972.510885</b>  | 486.759081 | 955.484336  | 478.245806 | 954.500320        | 477.7537 |
| 9  | <b>1003.545873</b> | 502.276574        | 986.519324         | 493.763300 | 985.535308         | 493.271292 | L | <b>858.467958</b>  | 429.737617 | 841.441409  | 421.224343 | 840.457393        | 420.7323 |
| 10 | <b>1132.588466</b> | 566.797871        | <b>1115.561917</b> | 558.284597 | 1114.577901        | 557.792588 | E | <b>745.383894</b>  | 373.195585 | 728.357345  | 364.682311 | 727.373329        | 364.1903 |
| 11 | <b>1233.636145</b> | <b>617.321710</b> | 1216.609596        | 608.808436 | 1215.625580        | 608.316428 | T | <b>616.341301</b>  | 308.674289 | 599.314752  | 300.161014 | 598.330736        | 299.6690 |
| 12 | <b>1290.657609</b> | 645.832442        | 1273.631060        | 637.319168 | 1272.647044        | 636.827160 | G | <b>515.293622</b>  | 258.150449 | 498.267073  | 249.637175 | 497.283057        | 249.1451 |
| 13 | <b>1389.726023</b> | 695.366649        | <b>1372.699474</b> | 686.853375 | 1371.715458        | 686.361367 | V | <b>458.272158</b>  | 229.639717 | 441.245609  | 221.126443 | 440.261593        | 220.6344 |
| 14 | <b>1486.778787</b> | 743.893032        | 1469.752238        | 735.379757 | 1468.768222        | 734.887749 | P | <b>359.203744</b>  | 180.105510 | 342.177195  | 171.592236 | <b>341.193179</b> | 171.1002 |
| 15 | <b>1573.810815</b> | 787.409046        | 1556.784266        | 778.895771 | <b>1555.800250</b> | 778.403763 | S | 262.150980         | 131.579128 | 245.124431  | 123.065854 | 244.140415        | 122.5738 |
| 16 |                    |                   |                    |            |                    |            | R | 175.118952         | 88.063114  | 158.092403  | 79.549839  |                   |          |

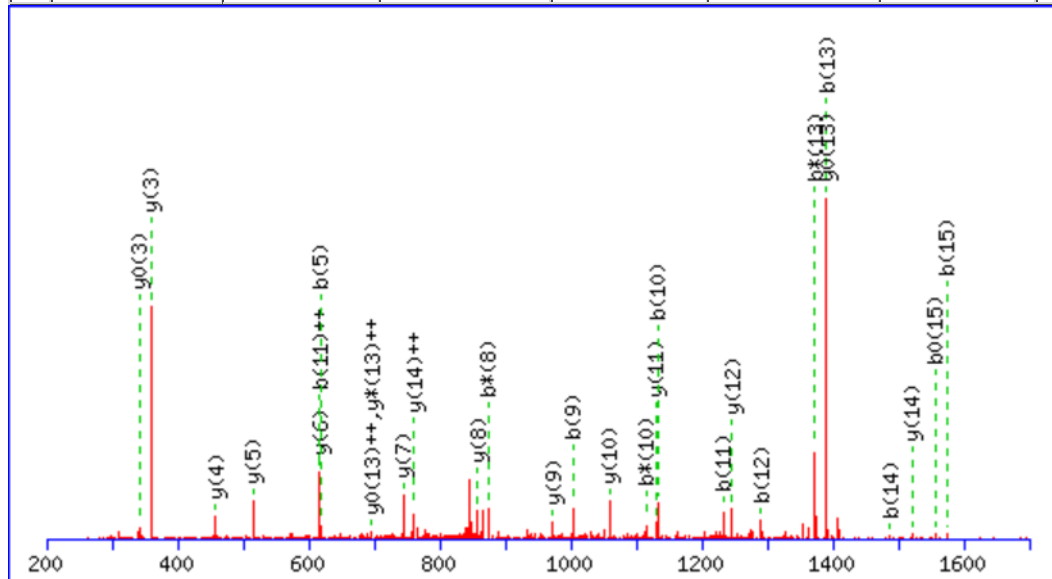

## Peptide View

MS/MS Fragmentation of **FGQSGPIVLDDVR**

Found in **IPI00418512**, Tax\_Id=9606 Gene\_Symbol=DMBT1 Isoform 4 of Deleted in malignant brain tumors 1 protein

**Experiment:** 15 - S\_E-3 **Fraction:** S\_E-3

Match to Query 10117: 1458.750048 from(730.382300,2+)

Title: OECHL100317\_23.16064.16064.2.dta

Data file \\Boromir\masse\Data LTQ-Orbitrap\Chrystelle Lacroix\Etude clinique sJPU\OECHL100317\_23.raw

**Monoisotopic mass of neutral peptide Mr(cal):** 1458.746719**Fixed modifications:** Carbamidomethyl (C) (apply to specified residues or termini only)**Ions****Score:** 72 **Expect:** 7.9e-006**Matches :** 18/140 fragment ions using 25 most intense peaks ([help](#))

| #  | <b>b</b>    | <b>b<sup>++</sup></b> | <b>b<sup>*</sup></b> | <b>b<sup>*++</sup></b> | <b>b<sup>0</sup></b> | <b>b<sup>0++</sup></b> | Seq.     | <b>y</b>    | <b>y<sup>++</sup></b> | <b>y<sup>*</sup></b> | <b>y<sup>*++</sup></b> | <b>y<sup>0</sup></b> | <b>y<sup>0++</sup></b> |
|----|-------------|-----------------------|----------------------|------------------------|----------------------|------------------------|----------|-------------|-----------------------|----------------------|------------------------|----------------------|------------------------|
| 1  | 148.075690  | 74.541483             |                      |                        |                      |                        | <b>F</b> |             |                       |                      |                        |                      |                        |
| 2  | 205.097154  | 103.052215            |                      |                        |                      |                        | <b>G</b> | 1312.685556 | 656.846416            | 1295.659007          | 648.333142             | 1294.674991          | 647.8411               |
| 3  | 333.155732  | 167.081504            | 316.129183           | 158.568230             |                      |                        | <b>Q</b> | 1255.664092 | 628.335684            | 1238.637543          | 619.822410             | 1237.653527          | 619.3304               |
| 4  | 390.177196  | 195.592236            | 373.150647           | 187.078961             |                      |                        | <b>G</b> | 1127.605514 | 564.306395            | 1110.578965          | 555.793121             | 1109.594949          | 555.3011               |
| 5  | 477.209224  | 239.108250            | 460.182675           | 230.594976             | 459.198659           | 230.102968             | <b>S</b> | 1070.584050 | 535.795663            | 1053.557501          | 527.282389             | 1052.573485          | 526.7903               |
| 6  | 534.230688  | 267.618982            | 517.204139           | 259.105708             | 516.220123           | 258.613700             | <b>G</b> | 983.552022  | 492.279649            | 966.525473           | 483.766375             | 965.541457           | 483.2743               |
| 7  | 631.283452  | 316.145364            | 614.256903           | 307.632090             | 613.272887           | 307.140082             | <b>P</b> | 926.530558  | 463.768917            | 909.504009           | 455.255643             | 908.519993           | 454.7636               |
| 8  | 744.367516  | 372.687396            | 727.340967           | 364.174122             | 726.356951           | 363.682114             | <b>I</b> | 829.477794  | 415.242535            | 812.451245           | 406.729261             | 811.467229           | 406.2372               |
| 9  | 843.435930  | 422.221603            | 826.409381           | 413.708329             | 825.425365           | 413.216321             | <b>V</b> | 716.393730  | 358.700503            | 699.367181           | 350.187229             | 698.383165           | 349.6952               |
| 10 | 956.519994  | 478.763635            | 939.493445           | 470.250361             | 938.509429           | 469.758353             | <b>L</b> | 617.325316  | 309.166296            | 600.298767           | 300.653022             | 599.314751           | 300.1610               |
| 11 | 1071.546937 | 536.277107            | 1054.520388          | 527.763832             | 1053.536372          | 527.271824             | <b>D</b> | 504.241252  | 252.624264            | 487.214703           | 244.110990             | 486.230687           | 243.6189               |
| 12 | 1186.573880 | 593.790578            | 1169.547331          | 585.277304             | 1168.563315          | 584.785296             | <b>D</b> | 389.214309  | 195.110793            | 372.187760           | 186.597518             | 371.203744           | 186.1055               |
| 13 | 1285.642294 | 643.324785            | 1268.615745          | 634.811511             | 1267.631729          | 634.319503             | <b>V</b> | 274.187366  | 137.597321            | 257.160817           | 129.084047             |                      |                        |
| 14 |             |                       |                      |                        |                      |                        | <b>R</b> | 175.118952  | 88.063114             | 158.092403           | 79.549839              |                      |                        |



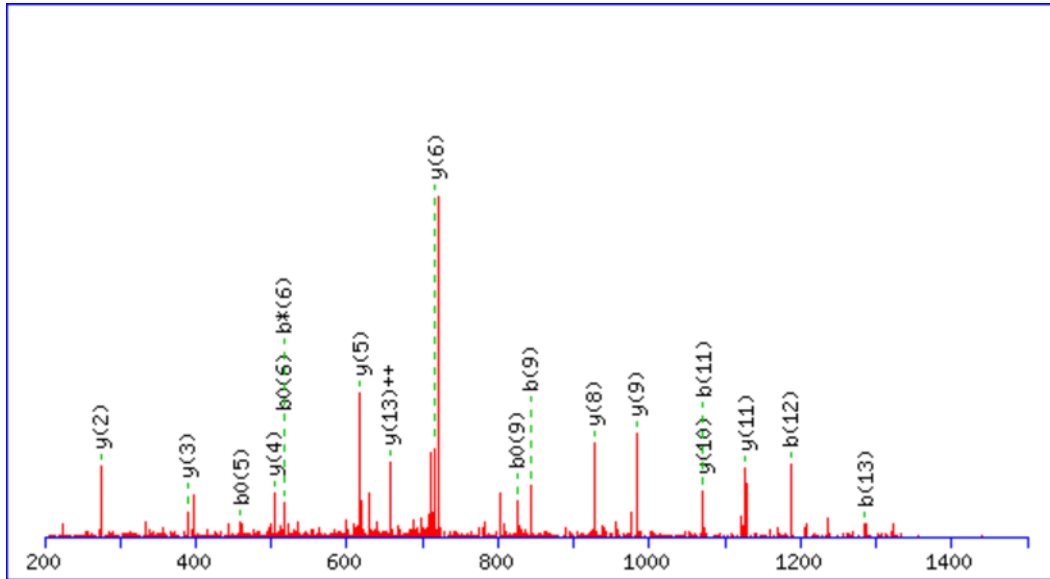

## Peptide View

MS/MS Fragmentation of **KAGPCEQAGSPCR**

Found in **IPI00028381**, Tax\_Id=9606 Gene\_Symbol=DLK2 Isoform 1 of Protein delta homolog 2

**Experiment:** 15 - S\_E-3 **Fraction:** S\_E-3

Match to Query 9681: 1416.626048 from(709.320300,2+)

Title: OECHL100317\_23.2345.2345.2.dta

Data file \\Boromir\masse\Data LTQ-Orbitrap\Chrystelle Lacroix\Etude clinique sJPU\OECHL100317\_23.raw

**Monoisotopic mass of neutral peptide Mr(calc):** 1416.623810 **Fixed modifications:** Carbamidomethyl (C) (apply to specified residues or termini only) **Ions**

**Score:** 87 **Expect:** 1.3e-007 **Matches :** 23/128 fragment ions using 36 most intense peaks ([help](#))

| # | b                 | b <sup>++</sup>   | b*         | b <sup>*++</sup> | b <sup>0</sup> | b <sup>0++</sup> | Seq.     | y                  | y <sup>++</sup>   | y*                 | y <sup>*++</sup> | y <sup>0</sup> | y <sup>0++</sup> |
|---|-------------------|-------------------|------------|------------------|----------------|------------------|----------|--------------------|-------------------|--------------------|------------------|----------------|------------------|
| 1 | 129.102239        | 65.054757         | 112.075690 | 56.541483        |                |                  | <b>K</b> |                    |                   |                    |                  |                |                  |
| 2 | 200.139353        | 100.573315        | 183.112804 | 92.060040        |                |                  | <b>A</b> | <b>1289.536133</b> | <b>645.271705</b> | 1272.509584        | 636.758430       | 1271.525568    | 636.2664         |
| 3 | <b>257.160817</b> | 129.084047        | 240.134268 | 120.570772       |                |                  | <b>G</b> | <b>1218.499019</b> | 609.753148        | 1201.472470        | 601.239873       | 1200.488454    | 600.7478         |
| 4 | 354.213581        | 177.610429        | 337.187032 | 169.097154       |                |                  | <b>P</b> | <b>1161.477555</b> | <b>581.242416</b> | 1144.451006        | 572.729141       | 1143.466990    | 572.2371         |
| 5 | 514.244230        | <b>257.625753</b> | 497.217681 | 249.112479       |                |                  | <b>C</b> | <b>1064.424791</b> | 532.716034        | <b>1047.398242</b> | 524.202759       | 1046.414226    | 523.7107         |

|    |             |            |             |            |             |            |   |            |            |            |            |            |          |
|----|-------------|------------|-------------|------------|-------------|------------|---|------------|------------|------------|------------|------------|----------|
| 6  | 643.286823  | 322.147050 | 626.260274  | 313.633775 | 625.276258  | 313.141767 | E | 904.394142 | 452.700709 | 887.367593 | 444.187434 | 886.383577 | 443.6954 |
| 7  | 771.345401  | 386.176339 | 754.318852  | 377.663064 | 753.334836  | 377.171056 | Q | 775.351549 | 388.179413 | 758.325000 | 379.666138 | 757.340984 | 379.1741 |
| 8  | 842.382515  | 421.694896 | 825.355966  | 413.181621 | 824.371950  | 412.689613 | A | 647.292971 | 324.150124 | 630.266422 | 315.636849 | 629.282406 | 315.1448 |
| 9  | 899.403979  | 450.205628 | 882.377430  | 441.692353 | 881.393414  | 441.200345 | G | 576.255857 | 288.631567 | 559.229308 | 280.118292 | 558.245292 | 279.6262 |
| 10 | 986.436007  | 493.721642 | 969.409458  | 485.208367 | 968.425442  | 484.716359 | S | 519.234393 | 260.120835 | 502.207844 | 251.607560 | 501.223828 | 251.1155 |
| 11 | 1083.488771 | 542.248024 | 1066.462222 | 533.734749 | 1065.478206 | 533.242741 | P | 432.202365 | 216.604820 | 415.175816 | 208.091546 |            |          |
| 12 | 1243.519420 | 622.263348 | 1226.492871 | 613.750074 | 1225.508855 | 613.258066 | C | 335.149601 | 168.078438 | 318.123052 | 159.565164 |            |          |
| 13 |             |            |             |            |             |            | R | 175.118952 | 88.063114  | 158.092403 | 79.549839  |            |          |

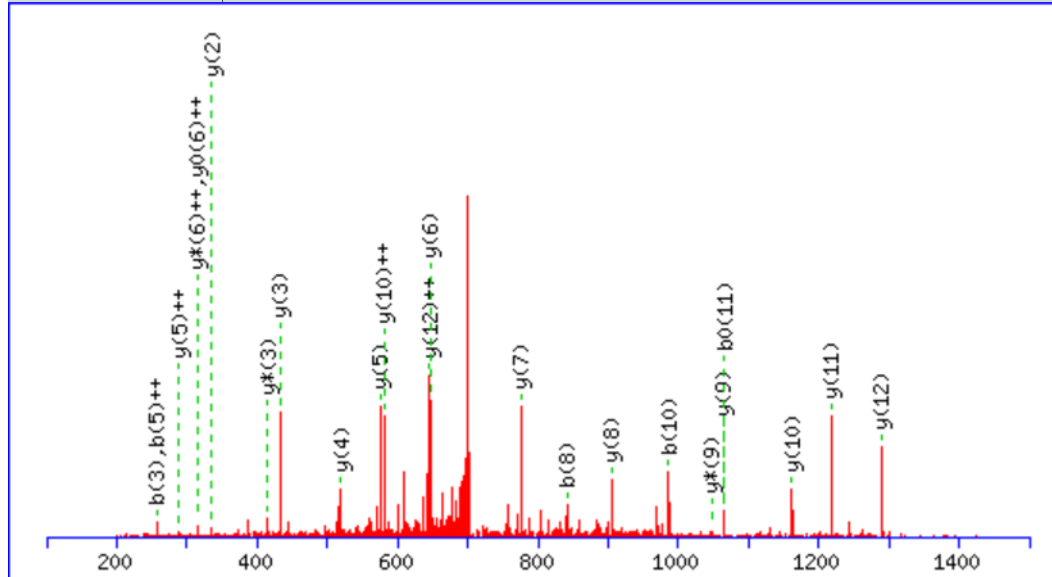

## Peptide View

MS/MS Fragmentation of **GMQLMHANAQR**

Found in **IPI00007853**, Tax\_Id=9606 Gene\_Symbol=IFI30 Gamma-interferon-inducible lysosomal thiol reductase

Experiment: 15 - S\_E-3 Fraction: S\_E-3

Match to Query 7841: 1255.591248 from(628.802900,2+)

Title: OECHL100317\_23.7230.7230.2.dta

Data file \\Boromir\masse\Data LTQ-Orbitrap\Chrystelle Lacroix\Etude clinique sJPU\OECHL100317\_23.raw

**Monoisotopic mass of neutral peptide Mr(calc):** 1255.591370**Fixed modifications:** Carbamidomethyl (C) (apply to specified residues or termini only)**Ions****Score:** 52 **Expect:** 0.0005**Matches :** 18/76 fragment ions using 33 most intense peaks ([help](#))

| #  | b           | b <sup>++</sup> | b*          | b* <sup>++</sup> | Seq. | y           | y <sup>++</sup> | y*          | y* <sup>++</sup> | #  |
|----|-------------|-----------------|-------------|------------------|------|-------------|-----------------|-------------|------------------|----|
| 1  | 58.028740   | 29.518008       |             |                  | G    |             |                 |             |                  | 11 |
| 2  | 189.069225  | 95.038250       |             |                  | M    | 1199.577209 | 600.292243      | 1182.550660 | 591.778968       | 10 |
| 3  | 317.127803  | 159.067540      | 300.101254  | 150.554265       | Q    | 1068.536724 | 534.772000      | 1051.510175 | 526.258726       | 9  |
| 4  | 430.211867  | 215.609572      | 413.185318  | 207.096297       | L    | 940.478146  | 470.742711      | 923.451597  | 462.229436       | 8  |
| 5  | 561.252352  | 281.129814      | 544.225803  | 272.616540       | M    | 827.394082  | 414.200679      | 810.367533  | 405.687404       | 7  |
| 6  | 698.311264  | 349.659270      | 681.284715  | 341.145996       | H    | 696.353597  | 348.680436      | 679.327048  | 340.167162       | 6  |
| 7  | 769.348378  | 385.177827      | 752.321829  | 376.664553       | A    | 559.294685  | 280.150981      | 542.268136  | 271.637706       | 5  |
| 8  | 883.391305  | 442.199291      | 866.364756  | 433.686016       | N    | 488.257571  | 244.632423      | 471.231022  | 236.119149       | 4  |
| 9  | 954.428419  | 477.717848      | 937.401870  | 469.204573       | A    | 374.214644  | 187.610960      | 357.188095  | 179.097685       | 3  |
| 10 | 1082.486997 | 541.747137      | 1065.460448 | 533.233862       | Q    | 303.177530  | 152.092403      | 286.150981  | 143.579128       | 2  |
| 11 |             |                 |             |                  | R    | 175.118952  | 88.063114       | 158.092403  | 79.549839        | 1  |

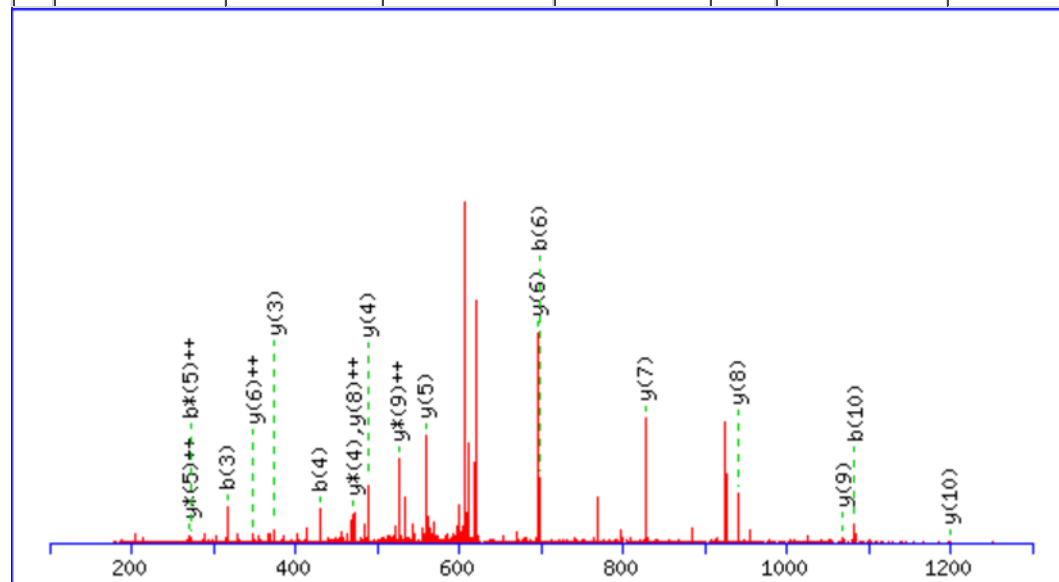

## Peptide View

MS/MS Fragmentation of **AVGLLTVISK**Found in **IPI00013446**, Tax\_Id=9606 Gene\_Symbol=PSCA Prostate stem cell antigen**Experiment:** 15 - S\_E-3 **Fraction:** S\_E-3

Match to Query 3773: 999.634648 from(500.824600,2+)

Title: OECHL100317\_23.17777.17777.2.dta

Data file \\Boromir\masse\Data LTQ-Orbitrap\Chrystelle Lacroix\Etude clinique sJPU\OECHL100317\_23.raw

**Monoisotopic mass of neutral peptide Mr(calc):** 999.632828**Fixed modifications:** Carbamidomethyl (C) (apply to specified residues or termini only)**Ions Score:**65 **Expect:** 3.8e-006**Matches :** 14/78 fragment ions using 24 most intense peaks ([help](#))

| #  | b                 | b <sup>++</sup>   | b <sup>0</sup> | b <sup>0++</sup> | Seq. | y                 | y <sup>++</sup> | y <sup>*</sup> | y <sup>*++</sup> | y <sup>0</sup> | y <sup>0++</sup> | #  |
|----|-------------------|-------------------|----------------|------------------|------|-------------------|-----------------|----------------|------------------|----------------|------------------|----|
| 1  | 72.044390         | 36.525833         |                |                  | A    |                   |                 |                |                  |                |                  | 10 |
| 2  | <b>171.112804</b> | 86.060040         |                |                  | V    | 929.602995        | 465.305136      | 912.576446     | 456.791861       | 911.592430     | 456.299853       | 9  |
| 3  | <b>228.134268</b> | 114.570772        |                |                  | G    | <b>830.534581</b> | 415.770929      | 813.508032     | 407.257654       | 812.524016     | 406.765646       | 8  |
| 4  | <b>341.218332</b> | <b>171.112804</b> |                |                  | L    | 773.513117        | 387.260197      | 756.486568     | 378.746922       | 755.502552     | 378.254914       | 7  |
| 5  | <b>454.302396</b> | 227.654836        |                |                  | L    | <b>660.429053</b> | 330.718165      | 643.402504     | 322.204890       | 642.418488     | 321.712882       | 6  |
| 6  | <b>555.350075</b> | 278.178676        | 537.339510     | 269.173393       | T    | <b>547.344989</b> | 274.176133      | 530.318440     | 265.662858       | 529.334424     | 265.170850       | 5  |
| 7  | <b>654.418489</b> | 327.712883        | 636.407924     | 318.707600       | V    | 446.297310        | 223.652293      | 429.270761     | 215.139018       | 428.286745     | 214.647010       | 4  |
| 8  | <b>767.502553</b> | 384.254915        | 749.491988     | 375.249632       | I    | <b>347.228896</b> | 174.118086      | 330.202347     | 165.604811       | 329.218331     | 165.112803       | 3  |
| 9  | <b>854.534581</b> | 427.770929        | 836.524016     | 418.765646       | S    | <b>234.144832</b> | 117.576054      | 217.118283     | 109.062779       | 216.134267     | 108.570771       | 2  |
| 10 |                   |                   |                |                  | K    | 147.112804        | 74.060040       | 130.086255     | 65.546765        |                |                  | 1  |

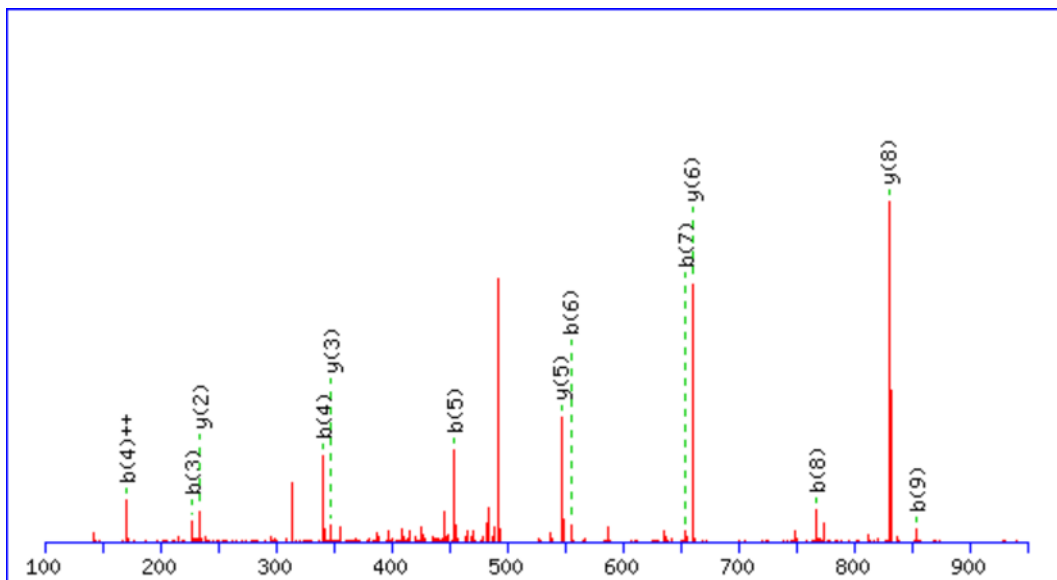

## Peptide View

MS/MS Fragmentation of **DFSLTSSSQTPGATK**

Found in **IPI00291300**, Tax\_Id=9606 Gene\_Symbol=PODXL2 Putative uncharacterized protein PODXL2

**Experiment:** 15 - S\_E-3 **Fraction:** S\_E-3

Match to Query 10771: 1525.724648 from(763.869600,2+)

Title: OECHL100317\_23.11535.11535.2.dta

Data file \\Boromir\masse\Data LTQ-Orbitrap\Chrystelle Lacroix\Etude clinique sJPU\OECHL100317\_23.raw

**Monoisotopic mass of neutral peptide Mr(calc):** 1525.726028 **Fixed modifications:** Carbamidomethyl (C) (apply to specified residues or termini only) **Ions**

**Score:** 77 **Expect:** 2e-006 **Matches :** 43/150 fragment ions using 75 most intense peaks ([help](#))

| # | b                 | b <sup>++</sup> | b <sup>*</sup> | b <sup>*++</sup> | b <sup>0</sup>    | b <sup>0++</sup> | Seq.     | y                  | y <sup>++</sup>   | y <sup>*</sup> | y <sup>*++</sup>  | y <sup>0</sup>     | y <sup>0++</sup> |
|---|-------------------|-----------------|----------------|------------------|-------------------|------------------|----------|--------------------|-------------------|----------------|-------------------|--------------------|------------------|
| 1 | 116.034219        | 58.520748       |                |                  | 98.023654         | 49.515465        | <b>D</b> |                    |                   |                |                   |                    |                  |
| 2 | <b>263.102633</b> | 132.054954      |                |                  | 245.092068        | 123.049672       | <b>F</b> | 1411.706351        | 706.356813        | 1394.679802    | 697.843539        | 1393.695786        | 697.3515         |
| 3 | <b>350.134661</b> | 175.570968      |                |                  | <b>332.124096</b> | 166.565686       | <b>S</b> | <b>1264.637937</b> | <b>632.822607</b> | 1247.611388    | <b>624.309332</b> | 1246.627372        | <b>623.8173</b>  |
| 4 | <b>463.218725</b> | 232.113001      |                |                  | <b>445.208160</b> | 223.107718       | <b>L</b> | <b>1177.605909</b> | 589.306592        | 1160.579360    | 580.793318        | 1159.595344        | 580.3013         |
| 5 | <b>564.266404</b> | 282.636840      |                |                  | <b>546.255839</b> | 273.631558       | <b>T</b> | <b>1064.521845</b> | 532.764561        | 1047.495296    | 524.251286        | <b>1046.511280</b> | 523.7592         |

|    |             |            |             |            |             |            |   |            |            |            |            |            |          |
|----|-------------|------------|-------------|------------|-------------|------------|---|------------|------------|------------|------------|------------|----------|
| 6  | 651.298432  | 326.152854 |             |            | 633.287867  | 317.147572 | S | 963.474166 | 482.240721 | 946.447617 | 473.727446 | 945.463601 | 473.2354 |
| 7  | 738.330460  | 369.668868 |             |            | 720.319895  | 360.663586 | S | 876.442138 | 438.724707 | 859.415589 | 430.211432 | 858.431573 | 429.7194 |
| 8  | 825.362488  | 413.184882 |             |            | 807.351923  | 404.179599 | S | 789.410110 | 395.208693 | 772.383561 | 386.695418 | 771.399545 | 386.2034 |
| 9  | 953.421066  | 477.214171 | 936.394517  | 468.700897 | 935.410501  | 468.208889 | Q | 702.378082 | 351.692679 | 685.351533 | 343.179404 | 684.367517 | 342.6873 |
| 10 | 1054.468745 | 527.738010 | 1037.442196 | 519.224736 | 1036.458180 | 518.732728 | T | 574.319504 | 287.663390 | 557.292955 | 279.150115 | 556.308939 | 278.6581 |
| 11 | 1151.521509 | 576.264392 | 1134.494960 | 567.751118 | 1133.510944 | 567.259110 | P | 473.271825 | 237.139550 | 456.245276 | 228.626276 | 455.261260 | 228.1342 |
| 12 | 1208.542973 | 604.775124 | 1191.516424 | 596.261850 | 1190.532408 | 595.769842 | G | 376.219061 | 188.613168 | 359.192512 | 180.099894 | 358.208496 | 179.6078 |
| 13 | 1279.580087 | 640.293681 | 1262.553538 | 631.780407 | 1261.569522 | 631.288399 | A | 319.197597 | 160.102436 | 302.171048 | 151.589162 | 301.187032 | 151.0971 |
| 14 | 1380.627766 | 690.817521 | 1363.601217 | 682.304246 | 1362.617201 | 681.812238 | T | 248.160483 | 124.583879 | 231.133934 | 116.070605 | 230.149918 | 115.5785 |
| 15 |             |            |             |            |             |            | K | 147.112804 | 74.060040  | 130.086255 | 65.546765  |            |          |

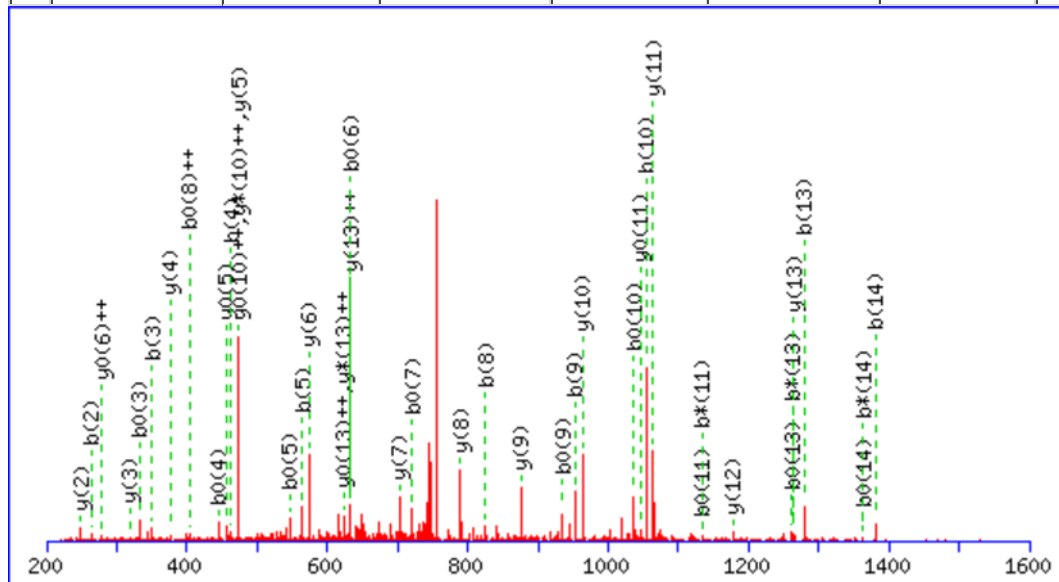

## Peptide View

MS/MS Fragmentation of **PMFIVNTNVPR**

Found in **IPI00293276**, Tax\_Id=9606 Gene\_Symbol=MIF Macrophage migration inhibitory factor

Experiment: 15 - S\_E-3 Fraction: S\_E-3

Match to Query 8262: 1286.680448 from(644.347500,2+)

Title: OECHL100317\_23.16181.16181.2.dta

Data file \\Boromir\masse\Data LTQ-Orbitrap\Chrystelle Lacroix\Etude clinique sJPU\OECHL100317\_23.raw

**Monoisotopic mass of neutral peptide Mr(calc):** 1286.680527**Fixed modifications:** Carbamidomethyl (C) (apply to specified residues or termini only)**Ions****Score:** 54 **Expect:** 0.00042**Matches :** 9/90 fragment ions using 11 most intense peaks ([help](#))

| #  | b                  | b <sup>++</sup> | b*          | b <sup>*++</sup> | b <sup>0</sup> | b <sup>0++</sup> | Seq. | y                  | y <sup>++</sup> | y*          | y <sup>*++</sup> | y <sup>0</sup> | y <sup>0++</sup> |
|----|--------------------|-----------------|-------------|------------------|----------------|------------------|------|--------------------|-----------------|-------------|------------------|----------------|------------------|
| 1  | 98.060040          | 49.533658       |             |                  |                |                  | P    |                    |                 |             |                  |                |                  |
| 2  | 229.100525         | 115.053900      |             |                  |                |                  | M    | <b>1190.635040</b> | 595.821158      | 1173.608491 | 587.307884       | 1172.624475    | 586.8158         |
| 3  | <b>376.168939</b>  | 188.588107      |             |                  |                |                  | F    | <b>1059.594555</b> | 530.300915      | 1042.568006 | 521.787641       | 1041.583990    | 521.2956         |
| 4  | <b>489.253003</b>  | 245.130139      |             |                  |                |                  | I    | <b>912.526141</b>  | 456.766708      | 895.499592  | 448.253434       | 894.515576     | 447.7614         |
| 5  | 588.321417         | 294.664347      |             |                  |                |                  | V    | <b>799.442077</b>  | 400.224676      | 782.415528  | 391.711402       | 781.431512     | 391.2193         |
| 6  | 702.364344         | 351.685810      | 685.337795  | 343.172535       |                |                  | N    | <b>700.373663</b>  | 350.690470      | 683.347114  | 342.177195       | 682.363098     | 341.6851         |
| 7  | 803.412023         | 402.209650      | 786.385474  | 393.696375       | 785.401458     | 393.204367       | T    | 586.330736         | 293.669006      | 569.304187  | 285.155732       | 568.320171     | 284.6637         |
| 8  | 917.454950         | 459.231113      | 900.428401  | 450.717838       | 899.444385     | 450.225830       | N    | 485.283057         | 243.145166      | 468.256508  | 234.631892       |                |                  |
| 9  | 1016.523364        | 508.765320      | 999.496815  | 500.252045       | 998.512799     | 499.760037       | V    | 371.240130         | 186.123703      | 354.213581  | 177.610428       |                |                  |
| 10 | <b>1113.576128</b> | 557.291702      | 1096.549579 | 548.778428       | 1095.565563    | 548.286419       | P    | <b>272.171716</b>  | 136.589496      | 255.145167  | 128.076221       |                |                  |
| 11 |                    |                 |             |                  |                |                  | R    | 175.118952         | 88.063114       | 158.092403  | 79.549839        |                |                  |

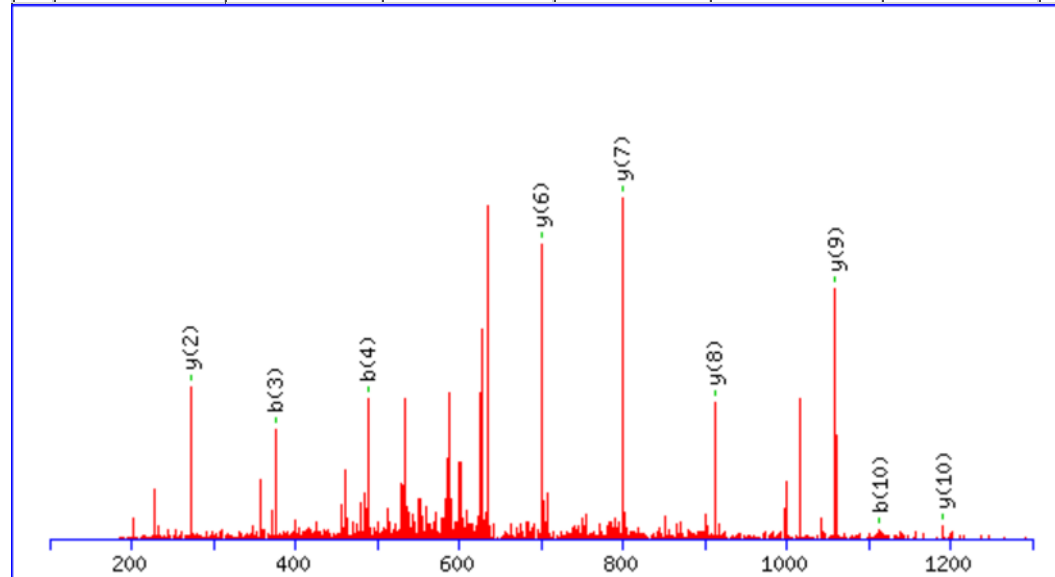

## Peptide View

MS/MS Fragmentation of **ASDTAMYYCAR**

Found in **IPI00735451**, Tax\_Id=9606 Gene\_Symbol=- Putative uncharacterized protein ENSP00000375035

**Experiment:** 15 - S\_E-3 **Fraction:** S\_E-3

Match to Query 8545: 1307.527848 from(654.771200,2+)

Title: OECHL100317\_23.9467.9467.2.dta

Data file \\Boromir\masse\Data LTQ-Orbitrap\Chrystelle Lacroix\Etude clinique sJPU\OECHL100317\_23.raw

**Monoisotopic mass of neutral peptide Mr(calc):** 1307.527435 **Fixed modifications:** Carbamidomethyl (C) (apply to specified residues or termini only) **Ions**

**Score:** 54 **Expect:** 7.8e-005 **Matches :** 14/84 fragment ions using 23 most intense peaks ([help](#))

| #         | b                  | b <sup>++</sup> | b <sup>0</sup>    | b <sup>0++</sup> | Seq.     | y                  | y <sup>++</sup> | y <sup>*</sup> | y <sup>*++</sup> | y <sup>0</sup> | y <sup>0++</sup> | #         |
|-----------|--------------------|-----------------|-------------------|------------------|----------|--------------------|-----------------|----------------|------------------|----------------|------------------|-----------|
| <b>1</b>  | 72.044390          | 36.525833       |                   |                  | <b>A</b> |                    |                 |                |                  |                |                  | <b>11</b> |
| <b>2</b>  | 159.076418         | 80.041847       | 141.065853        | 71.036564        | <b>S</b> | 1237.497622        | 619.252449      | 1220.471073    | 610.739175       | 1219.487057    | 610.247167       | <b>10</b> |
| <b>3</b>  | 274.103361         | 137.555319      | 256.092796        | 128.550036       | <b>D</b> | <b>1150.465594</b> | 575.736435      | 1133.439045    | 567.223161       | 1132.455029    | 566.731153       | <b>9</b>  |
| <b>4</b>  | <b>375.151040</b>  | 188.079158      | <b>357.140475</b> | 179.073876       | <b>T</b> | 1035.438651        | 518.222964      | 1018.412102    | 509.709689       | 1017.428086    | 509.217681       | <b>8</b>  |
| <b>5</b>  | <b>446.188154</b>  | 223.597715      | 428.177589        | 214.592433       | <b>A</b> | <b>934.390972</b>  | 467.699124      | 917.364423     | 459.185850       |                |                  | <b>7</b>  |
| <b>6</b>  | <b>577.228639</b>  | 289.117958      | 559.218074        | 280.112675       | <b>M</b> | <b>863.353858</b>  | 432.180567      | 846.327309     | 423.667293       |                |                  | <b>6</b>  |
| <b>7</b>  | <b>740.291968</b>  | 370.649622      | 722.281403        | 361.644340       | <b>Y</b> | <b>732.313373</b>  | 366.660325      | 715.286824     | 358.147050       |                |                  | <b>5</b>  |
| <b>8</b>  | <b>903.355297</b>  | 452.181287      | 885.344732        | 443.176004       | <b>Y</b> | <b>569.250044</b>  | 285.128660      | 552.223495     | 276.615386       |                |                  | <b>4</b>  |
| <b>9</b>  | 1063.385946        | 532.196611      | 1045.375381       | 523.191329       | <b>C</b> | <b>406.186715</b>  | 203.596995      | 389.160166     | 195.083721       |                |                  | <b>3</b>  |
| <b>10</b> | <b>1134.423060</b> | 567.715168      | 1116.412495       | 558.709886       | <b>A</b> | <b>246.156066</b>  | 123.581671      | 229.129517     | 115.068396       |                |                  | <b>2</b>  |
| <b>11</b> |                    |                 |                   |                  | <b>R</b> | 175.118952         | 88.063114       | 158.092403     | 79.549839        |                |                  | <b>1</b>  |



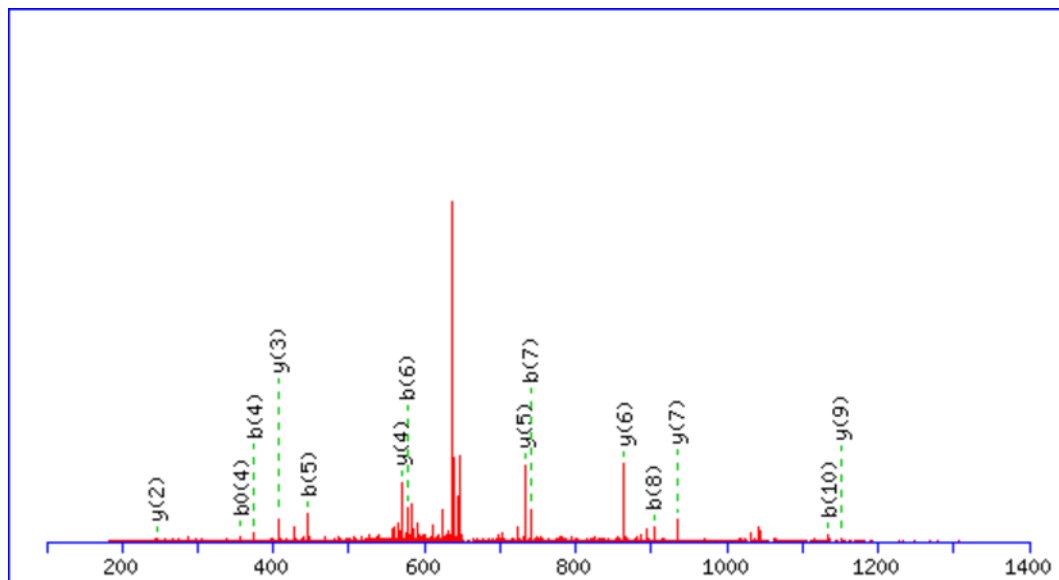

## Peptide View

MS/MS Fragmentation of **SDAAVDTSSSEITTK**

Found in **IPI00412977**, Tax\_Id=9606 Gene\_Symbol=- Prothymosin alpha

**Experiment:** 15 - S\_E-3 **Fraction:** S\_E-3

Match to Query 10157: 1465.678648 from(733.846600,2+)

Title: OECHL100317\_23.10552.10552.2.dta

Data file \\Boromir\masse\Data LTQ-Orbitrap\Chrystelle Lacroix\Etude clinique sJPU\OECHL100317\_23.raw

**Monoisotopic mass of neutral peptide Mr(calc):** 1465.678391 **Fixed modifications:** Carbamidomethyl (C) (apply to specified residues or termini only) **Variable**

**modifications:** N-term : Acetyl (N-term) **Ions Score:** 52 **Expect:** 0.00051 **Matches :** 29/128 fragment ions using 48 most intense peaks ([help](#))

| # | b          | b <sup>++</sup> | b <sup>0</sup> | b <sup>0++</sup> | Seq. | y           | y <sup>++</sup> | y <sup>*</sup> | y <sup>*++</sup> | y <sup>0</sup> | y <sup>0++</sup> | #  |
|---|------------|-----------------|----------------|------------------|------|-------------|-----------------|----------------|------------------|----------------|------------------|----|
| 1 | 130.049869 | 65.528572       | 112.039304     | 56.523290        | S    |             |                 |                |                  |                |                  | 14 |
| 2 | 245.076812 | 123.042044      | 227.066247     | 114.036761       | D    | 1337.643082 | 669.325179      | 1320.616533    | 660.811905       | 1319.632517    | 660.319897       | 13 |
| 3 | 316.113926 | 158.560601      | 298.103361     | 149.555319       | A    | 1222.616139 | 611.811708      | 1205.589590    | 603.298433       | 1204.605574    | 602.806425       | 12 |
| 4 | 387.151040 | 194.079158      | 369.140475     | 185.073875       | A    | 1151.579025 | 576.293151      | 1134.552476    | 567.779876       | 1133.568460    | 567.287868       | 11 |
| 5 | 486.219454 | 243.613365      | 468.208889     | 234.608082       | V    | 1080.541911 | 540.774594      | 1063.515362    | 532.261319       | 1062.531346    | 531.769311       | 10 |

|    |                    |                   |                    |                   |          |                   |            |            |            |                   |            |          |
|----|--------------------|-------------------|--------------------|-------------------|----------|-------------------|------------|------------|------------|-------------------|------------|----------|
| 6  | <b>601.246397</b>  | 301.126837        | 583.235832         | 292.121554        | <b>D</b> | <b>981.473497</b> | 491.240387 | 964.446948 | 482.727112 | <b>963.462932</b> | 482.235104 | <b>9</b> |
| 7  | <b>702.294076</b>  | 351.650676        | 684.283511         | 342.645394        | <b>T</b> | <b>866.446554</b> | 433.726915 | 849.420005 | 425.213641 | 848.435989        | 424.721633 | <b>8</b> |
| 8  | 789.326104         | 395.166690        | 771.315539         | 386.161408        | <b>S</b> | 765.398875        | 383.203076 | 748.372326 | 374.689801 | 747.388310        | 374.197793 | <b>7</b> |
| 9  | 876.358132         | 438.682704        | <b>858.347567</b>  | 429.677421        | <b>S</b> | <b>678.366847</b> | 339.687062 | 661.340298 | 331.173787 | 660.356282        | 330.681779 | <b>6</b> |
| 10 | <b>1005.400725</b> | 503.204001        | <b>987.390160</b>  | 494.198718        | <b>E</b> | 591.334819        | 296.171048 | 574.308270 | 287.657773 | 573.324254        | 287.165765 | <b>5</b> |
| 11 | <b>1118.484789</b> | <b>559.746033</b> | <b>1100.474224</b> | 550.740750        | <b>I</b> | <b>462.292226</b> | 231.649751 | 445.265677 | 223.136477 | 444.281661        | 222.644469 | <b>4</b> |
| 12 | <b>1219.532468</b> | 610.269872        | 1201.521903        | <b>601.264590</b> | <b>T</b> | <b>349.208162</b> | 175.107719 | 332.181613 | 166.594445 | 331.197597        | 166.102437 | <b>3</b> |
| 13 | <b>1320.580147</b> | 660.793712        | <b>1302.569582</b> | 651.788429        | <b>T</b> | <b>248.160483</b> | 124.583879 | 231.133934 | 116.070605 | 230.149918        | 115.578597 | <b>2</b> |
| 14 |                    |                   |                    |                   | <b>K</b> | 147.112804        | 74.060040  | 130.086255 | 65.546765  |                   |            | <b>1</b> |

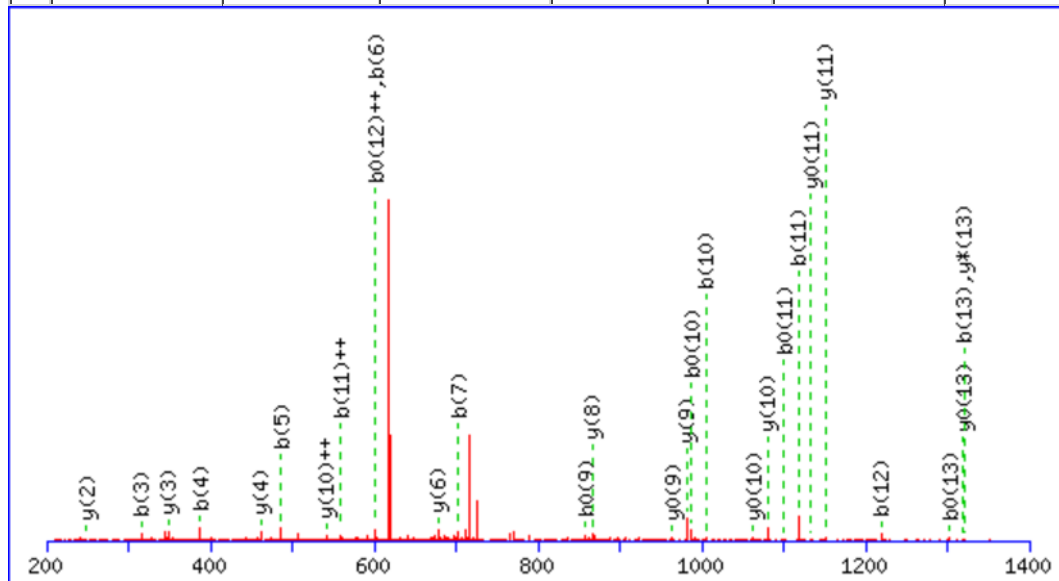

## Peptide View

MS/MS Fragmentation of **IESVLSSGKR**

Found in **IPI00018236**, Tax\_Id=9606 Gene\_Symbol=GM2A Ganglioside GM2 activator

**Experiment:** 15 - S\_E-3 **Fraction:** S\_E-3

Match to Query 6191: 1161.635048 from(581.824800,2+)

Title: OECHL100317\_23.6092.6092.2.dta

Data file \\Boromir\masse\Data LTQ-Orbitrap\Chrystelle Lacroix\Etude clinique sJPU\OECHL100317\_23.raw

**Monoisotopic mass of neutral peptide Mr(calc):** 1161.635330**Fixed modifications:** Carbamidomethyl (C) (apply to specified residues or termini only)**Ions****Score:** 51 **Expect:** 0.00055**Matches :** 28/94 fragment ions using 60 most intense peaks ([help](#))

| #  | b                 | b <sup>++</sup>   | b*         | b <sup>*++</sup> | b <sup>0</sup>    | b <sup>0++</sup> | Seq. | y                  | y <sup>++</sup>   | y*                | y <sup>*++</sup>  | y <sup>0</sup>    | y <sup>0++</sup>  |
|----|-------------------|-------------------|------------|------------------|-------------------|------------------|------|--------------------|-------------------|-------------------|-------------------|-------------------|-------------------|
| 1  | 114.091340        | 57.549308         |            |                  |                   |                  | I    |                    |                   |                   |                   |                   |                   |
| 2  | <b>243.133933</b> | 122.070605        |            |                  | 225.123368        | 113.065322       | E    | <b>1049.558562</b> | <b>525.282919</b> | 1032.532013       | 516.769645        | 1031.547997       | 516.277637        |
| 3  | <b>330.165961</b> | 165.586618        |            |                  | <b>312.155396</b> | 156.581336       | S    | <b>920.515969</b>  | <b>460.761623</b> | <b>903.489420</b> | <b>452.248348</b> | <b>902.505404</b> | <b>451.756340</b> |
| 4  | 429.234375        | <b>215.120826</b> |            |                  | <b>411.223810</b> | 206.115543       | V    | <b>833.483941</b>  | 417.245609        | 816.457392        | 408.732334        | 815.473376        | 408.240326        |
| 5  | 542.318439        | 271.662858        |            |                  | 524.307874        | 262.657575       | L    | <b>734.415527</b>  | <b>367.711402</b> | 717.388978        | 359.198127        | <b>716.404962</b> | 358.706119        |
| 6  | 629.350467        | 315.178872        |            |                  | 611.339902        | 306.173589       | S    | <b>621.331463</b>  | 311.169370        | 604.304914        | 302.656095        | 603.320898        | 302.164087        |
| 7  | <b>716.382495</b> | 358.694886        |            |                  | 698.371930        | 349.689603       | S    | <b>534.299435</b>  | 267.653356        | 517.272886        | 259.140081        | 516.288870        | 258.648073        |
| 8  | <b>803.414523</b> | <b>402.210899</b> |            |                  | 785.403958        | 393.205617       | S    | <b>447.267407</b>  | 224.137342        | 430.240858        | <b>215.624067</b> | 429.256842        | <b>215.132059</b> |
| 9  | 860.435987        | 430.721632        |            |                  | 842.425422        | 421.716349       | G    | <b>360.235379</b>  | 180.621328        | 343.208830        | 172.108053        |                   |                   |
| 10 | <b>988.530950</b> | 494.769113        | 971.504401 | 486.255838       | 970.520385        | 485.763830       | K    | 303.213915         | 152.110596        | 286.187366        | 143.597321        |                   |                   |
| 11 |                   |                   |            |                  |                   |                  | R    | <b>175.118952</b>  | 88.063114         | 158.092403        | 79.549840         |                   |                   |

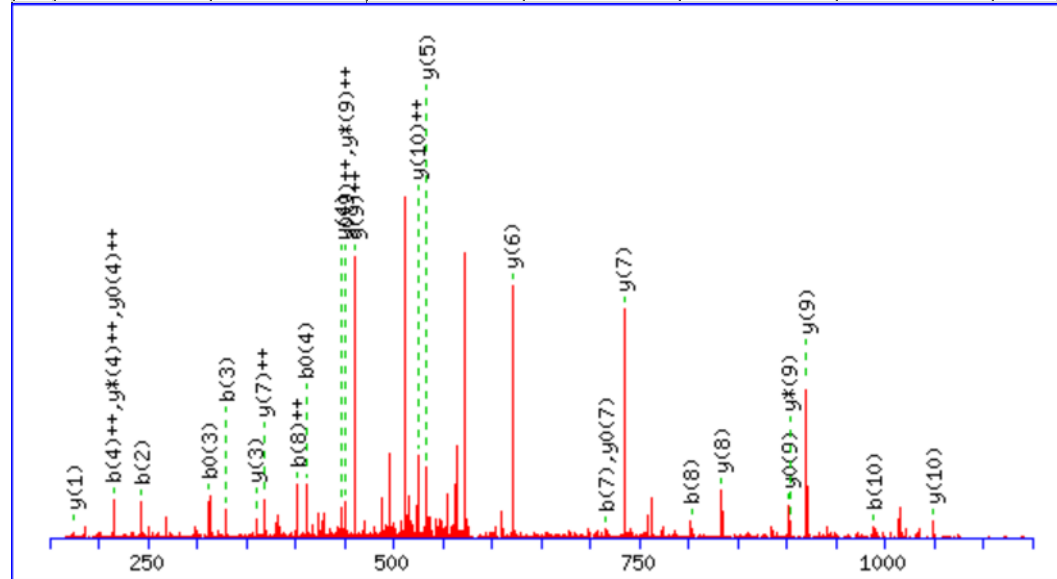

## Peptide View

MS/MS Fragmentation of **VYSTSVTGSR**Found in **IPI00010402**, Tax\_Id=9606 Gene\_Symbol=SH3BGRL3 Putative uncharacterized protein**Experiment:** 60 - PyE-3 **Fraction:** PyE-3

Match to Query 5002: 1055.523848 from(528.769200,2+)

Title: OECHL100317\_21.4349.4349.2.dta

Data file \\Boromir\masse\Data LTQ-Orbitrap\Chrystelle Lacroix\Etude clinique sJPU\OECHL100317\_21.raw

**Monoisotopic mass of neutral peptide Mr(calc):** 1055.524750**Fixed modifications:** Carbamidomethyl (C) (apply to specified residues or termini only)**Ions****Score:** 67 **Expect:** 1.6e-005**Matches :** 16/84 fragment ions using 18 most intense peaks ([help](#))

| #  | b                 | b <sup>++</sup>   | b <sup>0</sup>    | b <sup>0++</sup> | Seq. | y                 | y <sup>++</sup> | y <sup>*</sup> | y <sup>*++</sup> | y <sup>0</sup> | y <sup>0++</sup> | #  |
|----|-------------------|-------------------|-------------------|------------------|------|-------------------|-----------------|----------------|------------------|----------------|------------------|----|
| 1  | 100.075690        | 50.541483         |                   |                  | V    |                   |                 |                |                  |                |                  | 10 |
| 2  | <b>263.139019</b> | 132.073148        |                   |                  | Y    | <b>957.463601</b> | 479.235439      | 940.437052     | 470.722164       | 939.453036     | 470.230156       | 9  |
| 3  | <b>350.171047</b> | <b>175.589161</b> | 332.160482        | 166.583879       | S    | <b>794.400272</b> | 397.703774      | 777.373723     | 389.190499       | 776.389707     | 388.698491       | 8  |
| 4  | 451.218726        | 226.113001        | 433.208161        | 217.107719       | T    | <b>707.368244</b> | 354.187760      | 690.341695     | 345.674486       | 689.357679     | 345.182478       | 7  |
| 5  | 538.250754        | 269.629015        | <b>520.240189</b> | 260.623733       | S    | <b>606.320565</b> | 303.663921      | 589.294016     | 295.150646       | 588.310000     | 294.658638       | 6  |
| 6  | <b>637.319168</b> | <b>319.163222</b> | <b>619.308603</b> | 310.157940       | V    | 519.288537        | 260.147907      | 502.261988     | 251.634632       | 501.277972     | 251.142624       | 5  |
| 7  | 738.366847        | 369.687062        | 720.356282        | 360.681779       | T    | <b>420.220123</b> | 210.613699      | 403.193574     | 202.100425       | 402.209558     | 201.608417       | 4  |
| 8  | <b>795.388311</b> | 398.197794        | 777.377746        | 389.192511       | G    | <b>319.172444</b> | 160.089860      | 302.145895     | 151.576585       | 301.161879     | 151.084577       | 3  |
| 9  | 882.420339        | 441.713808        | <b>864.409774</b> | 432.708525       | S    | 262.150980        | 131.579128      | 245.124431     | 123.065853       | 244.140415     | 122.573845       | 2  |
| 10 |                   |                   |                   |                  | R    | <b>175.118952</b> | 88.063114       | 158.092403     | 79.549839        |                |                  | 1  |

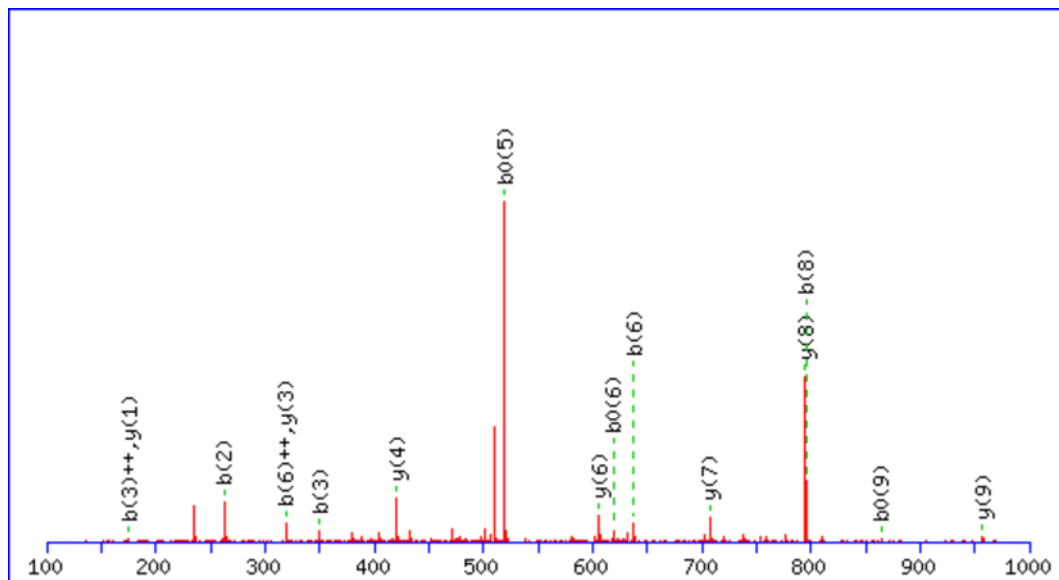

## Peptide View

MS/MS Fragmentation of **CLQCQMCDPAMGLR**

Found in **IPI00024331**, Tax\_Id=9606 Gene\_Symbol=TNFRSF14 Tumor necrosis factor receptor superfamily member 14

**Experiment:** 60 - PyE-3 **Fraction:** PyE-3

Match to Query 13141: 1738.708648 from(870.361600,2+)

Title: OECHL100317\_21.14164.14164.2.dta

Data file \\Boromir\masse\Data LTQ-Orbitrap\Chrystelle Lacroix\Etude clinique sJPU\OECHL100317\_21.raw

**Monoisotopic mass of neutral peptide Mr(calc):** 1738.708160 **Fixed modifications:** Carbamidomethyl (C) (apply to specified residues or termini only) **Ions**

**Score:** 85 **Expect:** 6.2e-008 **Matches :** 32/126 fragment ions using 42 most intense peaks ([help](#))

| # | b                 | b <sup>++</sup>   | b <sup>*</sup>    | b <sup>*++</sup> | b <sup>0</sup> | b <sup>0++</sup> | Seq. | y                  | y <sup>++</sup>   | y <sup>*</sup>     | y <sup>*++</sup>  | y <sup>0</sup> | y <sup>0++</sup> |
|---|-------------------|-------------------|-------------------|------------------|----------------|------------------|------|--------------------|-------------------|--------------------|-------------------|----------------|------------------|
| 1 | 161.037925        | 81.022600         |                   |                  |                |                  | C    |                    |                   |                    |                   |                |                  |
| 2 | <b>274.121989</b> | 137.564632        |                   |                  |                |                  | L    | 1579.684789        | 790.346032        | 1562.658240        | 781.832758        | 1561.674224    | 781.3407         |
| 3 | <b>402.180567</b> | 201.593921        | 385.154018        | 193.080647       |                |                  | Q    | <b>1466.600725</b> | <b>733.804001</b> | 1449.574176        | <b>725.290726</b> | 1448.590160    | <b>724.7987</b>  |
| 4 | <b>562.211216</b> | 281.609246        | <b>545.184667</b> | 273.095972       |                |                  | C    | <b>1338.542147</b> | 669.774711        | 1321.515598        | 661.261437        | 1320.531582    | 660.7694         |
| 5 | <b>690.269794</b> | <b>345.638535</b> | 673.243245        | 337.125261       |                |                  | Q    | <b>1178.511498</b> | 589.759387        | <b>1161.484949</b> | 581.246113        | 1160.500933    | 580.7541         |

|    |                    |            |                    |                   |             |            |          |                    |                   |             |            |             |          |
|----|--------------------|------------|--------------------|-------------------|-------------|------------|----------|--------------------|-------------------|-------------|------------|-------------|----------|
| 6  | <b>821.310279</b>  | 411.158778 | <b>804.283730</b>  | <b>402.645503</b> |             |            | <b>M</b> | <b>1050.452920</b> | 525.730098        | 1033.426371 | 517.216824 | 1032.442355 | 516.7248 |
| 7  | <b>981.340928</b>  | 491.174102 | <b>964.314379</b>  | 482.660828        |             |            | <b>C</b> | <b>919.412435</b>  | 460.209856        | 902.385886  | 451.696581 | 901.401870  | 451.2045 |
| 8  | <b>1096.367871</b> | 548.687574 | 1079.341322        | 540.174299        | 1078.357306 | 539.682291 | <b>D</b> | <b>759.381786</b>  | 380.194531        | 742.355237  | 371.681256 | 741.371221  | 371.1892 |
| 9  | 1193.420635        | 597.213956 | 1176.394086        | 588.700681        | 1175.410070 | 588.208673 | <b>P</b> | <b>644.354843</b>  | 322.681059        | 627.328294  | 314.167785 |             |          |
| 10 | <b>1264.457749</b> | 632.732513 | 1247.431200        | 624.219238        | 1246.447184 | 623.727230 | <b>A</b> | 547.302079         | <b>274.154677</b> | 530.275530  | 265.641403 |             |          |
| 11 | <b>1395.498234</b> | 698.252755 | <b>1378.471685</b> | 689.739481        | 1377.487669 | 689.247473 | <b>M</b> | <b>476.264965</b>  | 238.636120        | 459.238416  | 230.122846 |             |          |
| 12 | <b>1452.519698</b> | 726.763487 | 1435.493149        | 718.250213        | 1434.509133 | 717.758205 | <b>G</b> | <b>345.224480</b>  | 173.115878        | 328.197931  | 164.602603 |             |          |
| 13 | <b>1565.603762</b> | 783.305519 | 1548.577213        | 774.792245        | 1547.593197 | 774.300236 | <b>L</b> | <b>288.203016</b>  | 144.605146        | 271.176467  | 136.091871 |             |          |
| 14 |                    |            |                    |                   |             |            | <b>R</b> | 175.118952         | 88.063114         | 158.092403  | 79.549839  |             |          |

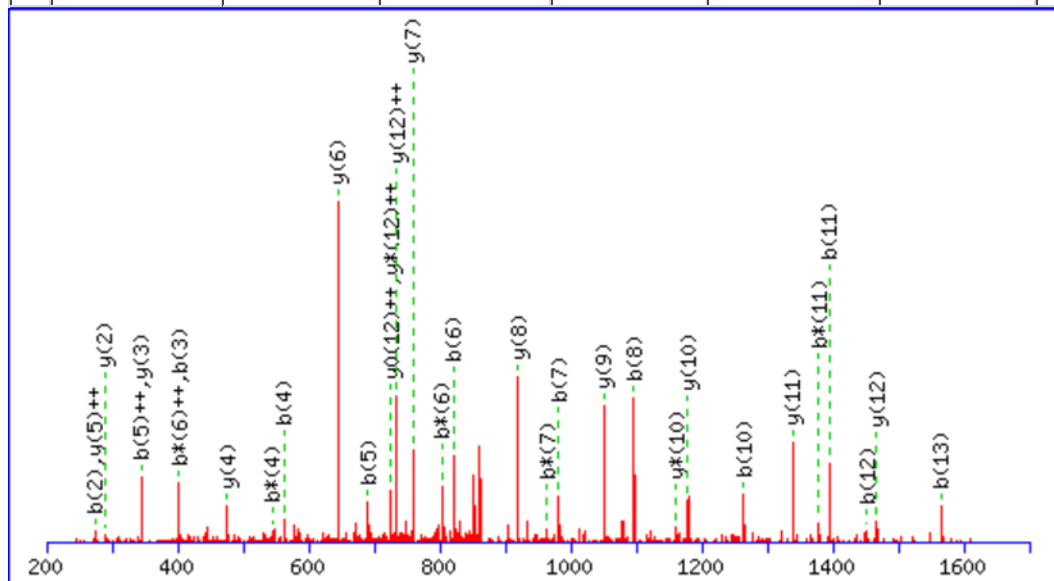

## Peptide View

MS/MS Fragmentation of **AHGQESAI FNEVAPGYFSR**

Found in **IPI00170635**, Tax\_Id=9606 Gene\_Symbol=SECTM1 Secreted and transmembrane protein 1

**Experiment:** 60 - PyE-3 **Fraction:** PyE-3

Match to Query 15338: 2078.981448 from(1040.498000,2+)

Title: OECHL100317\_21.16990.16990.2.dta

Data file \\Boromir\masse\Data LTQ-Orbitrap\Chrystelle Lacroix\Etude clinique sJPU\OECHL100317\_21.raw

**Monoisotopic mass of neutral peptide Mr(calc): 2078.980988**Fixed modifications: Carbamidomethyl (C) (apply to specified residues or termini only)**Ions****Score: 86** **Expect: 4.1e-007**Matches : 39/200 fragment ions using 67 most intense peaks ([help](#))

| #  | b           | b <sup>++</sup> | b*          | b <sup>*++</sup> | b <sup>0</sup> | b <sup>0++</sup> | Seq. | y           | y <sup>++</sup> | y*          | y <sup>*++</sup> | y <sup>0</sup> | y <sup>0++</sup> |
|----|-------------|-----------------|-------------|------------------|----------------|------------------|------|-------------|-----------------|-------------|------------------|----------------|------------------|
| 1  | 72.044390   | 36.525833       |             |                  |                |                  | A    |             |                 |             |                  |                |                  |
| 2  | 209.103302  | 105.055289      |             |                  |                |                  | H    | 2008.951166 | 1004.979221     | 1991.924617 | 996.465947       | 1990.940601    | 995.973          |
| 3  | 266.124766  | 133.566021      |             |                  |                |                  | G    | 1871.892254 | 936.449765      | 1854.865705 | 927.936491       | 1853.881689    | 927.444          |
| 4  | 394.183344  | 197.595310      | 377.156795  | 189.082035       |                |                  | Q    | 1814.870790 | 907.939033      | 1797.844241 | 899.425759       | 1796.860225    | 898.933          |
| 5  | 523.225937  | 262.116607      | 506.199388  | 253.603332       | 505.215372     | 253.111324       | E    | 1686.812212 | 843.909744      | 1669.785663 | 835.396470       | 1668.801647    | 834.904          |
| 6  | 610.257965  | 305.632621      | 593.231416  | 297.119346       | 592.247400     | 296.627338       | S    | 1557.769619 | 779.388448      | 1540.743070 | 770.875173       | 1539.759054    | 770.383          |
| 7  | 681.295079  | 341.151178      | 664.268530  | 332.637903       | 663.284514     | 332.145895       | A    | 1470.737591 | 735.872434      | 1453.711042 | 727.359159       | 1452.727026    | 726.867          |
| 8  | 794.379143  | 397.693210      | 777.352594  | 389.179935       | 776.368578     | 388.687927       | I    | 1399.700477 | 700.353877      | 1382.673928 | 691.840602       | 1381.689912    | 691.348          |
| 9  | 941.447557  | 471.227417      | 924.421008  | 462.714142       | 923.436992     | 462.222134       | F    | 1286.616413 | 643.811845      | 1269.589864 | 635.298570       | 1268.605848    | 634.806          |
| 10 | 1055.490484 | 528.248880      | 1038.463935 | 519.735606       | 1037.479919    | 519.243597       | N    | 1139.547999 | 570.277638      | 1122.521450 | 561.764363       | 1121.537434    | 561.272          |
| 11 | 1184.533077 | 592.770176      | 1167.506528 | 584.256902       | 1166.522512    | 583.764894       | E    | 1025.505072 | 513.256174      | 1008.478523 | 504.742900       | 1007.494507    | 504.250          |
| 12 | 1283.601491 | 642.304383      | 1266.574942 | 633.791109       | 1265.590926    | 633.299101       | V    | 896.462479  | 448.734878      | 879.435930  | 440.221603       | 878.451914     | 439.729          |
| 13 | 1354.638605 | 677.822940      | 1337.612056 | 669.309666       | 1336.628040    | 668.817658       | A    | 797.394065  | 399.200671      | 780.367516  | 390.687396       | 779.383500     | 390.195          |
| 14 | 1451.691369 | 726.349322      | 1434.664820 | 717.836048       | 1433.680804    | 717.344040       | P    | 726.356951  | 363.682114      | 709.330402  | 355.168839       | 708.346386     | 354.676          |
| 15 | 1508.712833 | 754.860054      | 1491.686284 | 746.346780       | 1490.702268    | 745.854772       | G    | 629.304187  | 315.155732      | 612.277638  | 306.642457       | 611.293622     | 306.150          |
| 16 | 1671.776162 | 836.391719      | 1654.749613 | 827.878445       | 1653.765597    | 827.386436       | Y    | 572.282723  | 286.645000      | 555.256174  | 278.131725       | 554.272158     | 277.639          |
| 17 | 1818.844576 | 909.925926      | 1801.818027 | 901.412652       | 1800.834011    | 900.920643       | F    | 409.219394  | 205.113335      | 392.192845  | 196.600061       | 391.208829     | 196.108          |
| 18 | 1905.876604 | 953.441940      | 1888.850055 | 944.928666       | 1887.866039    | 944.436658       | S    | 262.150980  | 131.579128      | 245.124431  | 123.065854       | 244.140415     | 122.573          |
| 19 |             |                 |             |                  |                |                  | R    | 175.118952  | 88.063114       | 158.092403  | 79.549840        |                |                  |

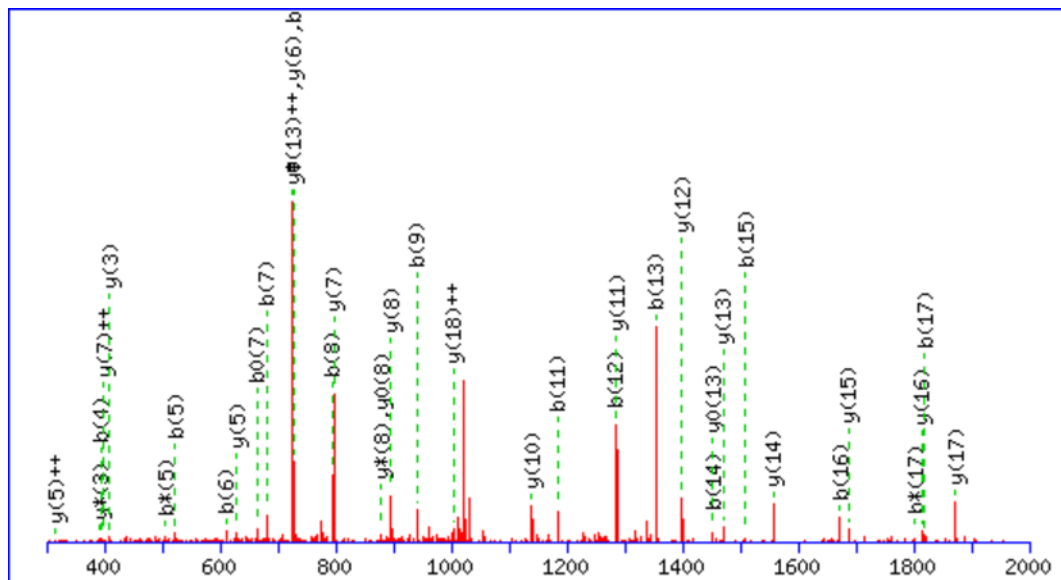

## Peptide View

MS/MS Fragmentation of **SKEDSNSTESKSSSEEDGQLK**

Found in **IPI00012734**, Tax\_Id=9606 Gene\_Symbol=DMP1 Isoform 1 of Dentin matrix acidic phosphoprotein 1

**Experiment:** 60 - PyE-3 **Fraction:** PyE-3

Match to Query 16303: 2271.001448 from(1136.508000,2+)

Title: OECHL100317\_21.2411.2411.2.dta

Data file \\Boromir\masse\Data LTQ-Orbitrap\Chrystelle Lacroix\Etude clinique sJPU\OECHL100317\_21.raw

**Monoisotopic mass of neutral peptide Mr(calc):** 2270.998581 **Fixed modifications:** Carbamidomethyl (C) (apply to specified residues or termini only) **Ions**

**Score:** 72 **Expect:** 5.5e-006 **Matches :** 44/230 fragment ions using 85 most intense peaks ([help](#))

| # | b                 | b <sup>++</sup> | b <sup>*</sup> | b <sup>*++</sup> | b <sup>0</sup> | b <sup>0++</sup> | Seq. | y                  | y <sup>++</sup>   | y <sup>*</sup>     | y <sup>*++</sup>  | y <sup>0</sup> |    |
|---|-------------------|-----------------|----------------|------------------|----------------|------------------|------|--------------------|-------------------|--------------------|-------------------|----------------|----|
| 1 | 88.039304         | 44.523290       |                |                  | 70.028739      | 35.518008        | S    |                    |                   |                    |                   |                |    |
| 2 | 216.134267        | 108.570771      | 199.107718     | 100.057497       | 198.123702     | 99.565489        | K    | 2184.973868        | 1092.990572       | 2167.947319        | 1084.477297       | 2166.963303    | 10 |
| 3 | 345.176860        | 173.092068      | 328.150311     | 164.578793       | 327.166295     | 164.086785       | E    | 2056.878905        | 1028.943090       | 2039.852356        | 1020.429816       | 2038.868340    | 10 |
| 4 | <b>460.203803</b> | 230.605539      | 443.177254     | 222.092265       | 442.193238     | 221.600257       | D    | <b>1927.836312</b> | <b>964.421794</b> | <b>1910.809763</b> | 955.908520        | 1909.825747    | 9  |
| 5 | 547.235831        | 274.121554      | 530.209282     | 265.608279       | 529.225266     | 265.116271       | S    | <b>1812.809369</b> | <b>906.908323</b> | 1795.782820        | <b>898.395048</b> | 1794.798804    | 8  |



|    |                    |                    |                    |                   |                    |                   |   |                    |                   |                   |                   |                    |    |
|----|--------------------|--------------------|--------------------|-------------------|--------------------|-------------------|---|--------------------|-------------------|-------------------|-------------------|--------------------|----|
| 6  | <b>661.278758</b>  | 331.143017         | 644.252209         | 322.629743        | 643.268193         | 322.137735        | N | 1725.777341        | 863.392309        | 1708.750792       | 854.879034        | 1707.766776        | 8: |
| 7  | 748.310786         | 374.659031         | <b>731.284237</b>  | <b>366.145757</b> | 730.300221         | 365.653749        | S | <b>1611.734414</b> | <b>806.370845</b> | 1594.707865       | 797.857571        | 1593.723849        | 7: |
| 8  | 849.358465         | 425.182871         | 832.331916         | 416.669596        | 831.347900         | 416.177588        | T | <b>1524.702386</b> | 762.854831        | 1507.675837       | 754.341557        | <b>1506.691821</b> | 7: |
| 9  | <b>978.401058</b>  | 489.704167         | 961.374509         | 481.190893        | 960.390493         | 480.698885        | E | <b>1423.654707</b> | 712.330992        | 1406.628158       | 703.817717        | <b>1405.644142</b> | 7: |
| 10 | 1065.433086        | 533.220181         | 1048.406537        | 524.706907        | 1047.422521        | 524.214899        | S | <b>1294.612114</b> | 647.809695        | 1277.585565       | 639.296421        | <b>1276.601549</b> | 6: |
| 11 | <b>1193.528049</b> | 597.267663         | 1176.501500        | 588.754388        | 1175.517484        | 588.262380        | K | <b>1207.580086</b> | 604.293681        | 1190.553537       | 595.780407        | 1189.569521        | 5: |
| 12 | 1280.560077        | 640.783677         | 1263.533528        | 632.270402        | 1262.549512        | 631.778394        | S | <b>1079.485123</b> | 540.246200        | 1062.458574       | 531.732925        | 1061.474558        | 5: |
| 13 | 1367.592105        | 684.299691         | 1350.565556        | 675.786416        | 1349.581540        | 675.294408        | S | <b>992.453095</b>  | 496.730186        | 975.426546        | 488.216911        | 974.442530         | 4: |
| 14 | 1454.624133        | 727.815705         | 1437.597584        | 719.302430        | <b>1436.613568</b> | 718.810422        | S | <b>905.421067</b>  | 453.214172        | 888.394518        | 444.700897        | 887.410502         | 4: |
| 15 | <b>1583.666726</b> | 792.337001         | 1566.640177        | 783.823727        | 1565.656161        | 783.331719        | E | <b>818.389039</b>  | 409.698158        | 801.362490        | <b>401.184883</b> | 800.378474         | 4: |
| 16 | <b>1712.709319</b> | 856.858298         | <b>1695.682770</b> | 848.345023        | 1694.698754        | 847.853015        | E | <b>689.346446</b>  | 345.176861        | <b>672.319897</b> | 336.663587        | 671.335881         | 3: |
| 17 | <b>1827.736262</b> | 914.371769         | <b>1810.709713</b> | <b>905.858495</b> | <b>1809.725697</b> | <b>905.366487</b> | D | <b>560.303853</b>  | 280.655565        | 543.277304        | 272.142290        | <b>542.293288</b>  | 2: |
| 18 | 1884.757726        | 942.882501         | 1867.731177        | 934.369227        | 1866.747161        | 933.877219        | G | <b>445.276910</b>  | 223.142093        | 428.250361        | 214.628818        |                    |    |
| 19 | 2012.816304        | <b>1006.911790</b> | 1995.789755        | 998.398516        | 1994.805739        | 997.906508        | Q | 388.255446         | 194.631361        | <b>371.228897</b> | 186.118087        |                    |    |
| 20 | 2125.900368        | <b>1063.453822</b> | 2108.873819        | 1054.940547       | 2107.889803        | 1054.448539       | L | 260.196868         | 130.602072        | 243.170319        | 122.088798        |                    |    |
| 21 |                    |                    |                    |                   |                    |                   | K | 147.112804         | 74.060040         | 130.086255        | 65.546765         |                    |    |

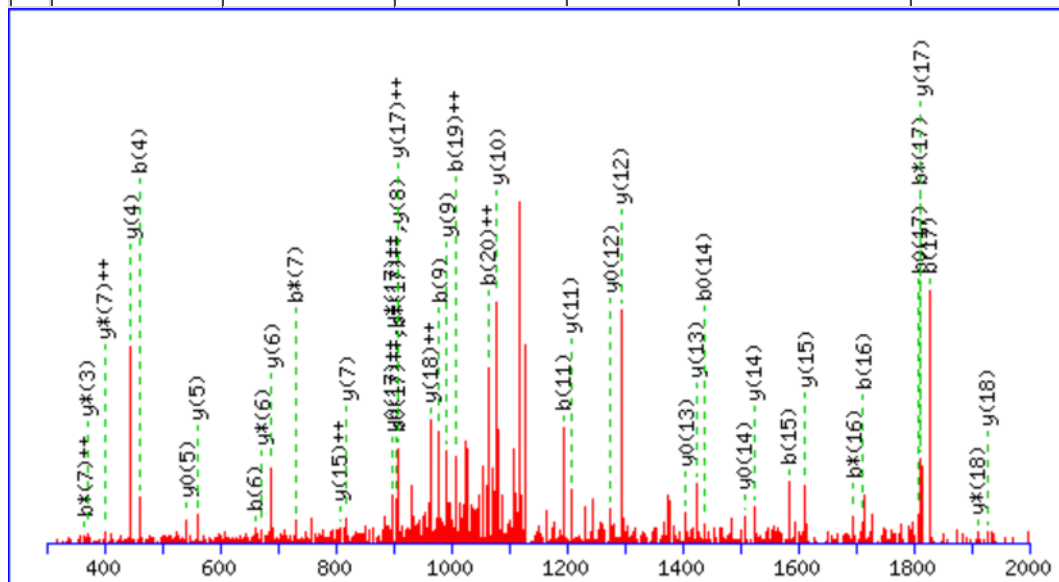

## Peptide View

MS/MS Fragmentation of **GLGDDTALNDAR**

Found in **IPI00216914**, Tax\_Id=9606 Gene\_Symbol=VMO1 Vitelline membrane outer layer protein 1 homolog

**Experiment:** 60 - PyE-3 **Fraction:** PyE-3

Match to Query 7254: 1216.568648 from(609.291600,2+)

Title: OECHL100317\_21.8678.8678.2.dta

Data file \\Boromir\masse\Data LTQ-Orbitrap\Chrystelle Lacroix\Etude clinique sJPU\OECHL100317\_21.raw

**Monoisotopic mass of neutral peptide Mr(calc):** 1216.568390 **Fixed modifications:** Carbamidomethyl (C) (apply to specified residues or termini only) **Ions**

**Score:** 75 **Expect:** 2.3e-006 **Matches :** 32/106 fragment ions using 42 most intense peaks ([help](#))

| #  | b                 | b <sup>++</sup>   | b*                | b <sup>*++</sup> | b <sup>0</sup>    | b <sup>0++</sup> | Seq. | y                  | y <sup>++</sup>   | y*                | y <sup>*++</sup>  | y <sup>0</sup>    | y <sup>0++</sup> |
|----|-------------------|-------------------|-------------------|------------------|-------------------|------------------|------|--------------------|-------------------|-------------------|-------------------|-------------------|------------------|
| 1  | 58.028740         | 29.518008         |                   |                  |                   |                  | G    |                    |                   |                   |                   |                   |                  |
| 2  | 171.112804        | 86.060040         |                   |                  |                   |                  | L    | 1160.554207        | 580.780742        | 1143.527658       | 572.267467        | 1142.543642       | 571.7754         |
| 3  | <b>228.134268</b> | 114.570772        |                   |                  |                   |                  | G    | <b>1047.470143</b> | <b>524.238710</b> | 1030.443594       | 515.725435        | 1029.459578       | 515.2334         |
| 4  | <b>343.161211</b> | 172.084243        |                   |                  | 325.150646        | 163.078961       | D    | <b>990.448679</b>  | 495.727978        | <b>973.422130</b> | 487.214703        | <b>972.438114</b> | 486.7226         |
| 5  | <b>458.188154</b> | <b>229.597715</b> |                   |                  | <b>440.177589</b> | 220.592433       | D    | <b>875.421736</b>  | 438.214506        | 858.395187        | 429.701232        | <b>857.411171</b> | 429.2092         |
| 6  | <b>559.235833</b> | 280.121555        |                   |                  | 541.225268        | 271.116272       | T    | <b>760.394793</b>  | 380.701035        | <b>743.368244</b> | 372.187760        | 742.384228        | 371.6957         |
| 7  | 630.272947        | 315.640112        |                   |                  | 612.262382        | 306.634829       | A    | <b>659.347114</b>  | 330.177195        | 642.320565        | 321.663921        | 641.336549        | 321.1719         |
| 8  | <b>743.357011</b> | 372.182144        |                   |                  | <b>725.346446</b> | 363.176861       | L    | <b>588.310000</b>  | 294.658638        | 571.283451        | 286.145364        | 570.299435        | 285.6533         |
| 9  | <b>857.399938</b> | 429.203607        | <b>840.373389</b> | 420.690333       | 839.389373        | 420.198325       | N    | <b>475.225936</b>  | 238.116606        | <b>458.199387</b> | <b>229.603331</b> | 457.215371        | <b>229.1113</b>  |
| 10 | <b>972.426881</b> | 486.717079        | <b>955.400332</b> | 478.203804       | 954.416316        | 477.711796       | D    | <b>361.183009</b>  | 181.095142        | 344.156460        | 172.581868        | <b>343.172444</b> | 172.0898         |
| 11 | 1043.463995       | 522.235636        | 1026.437446       | 513.722361       | 1025.453430       | 513.230353       | A    | <b>246.156066</b>  | 123.581671        | <b>229.129517</b> | 115.068397        |                   |                  |
| 12 |                   |                   |                   |                  |                   |                  | R    | <b>175.118952</b>  | 88.063114         | 158.092403        | 79.549839         |                   |                  |

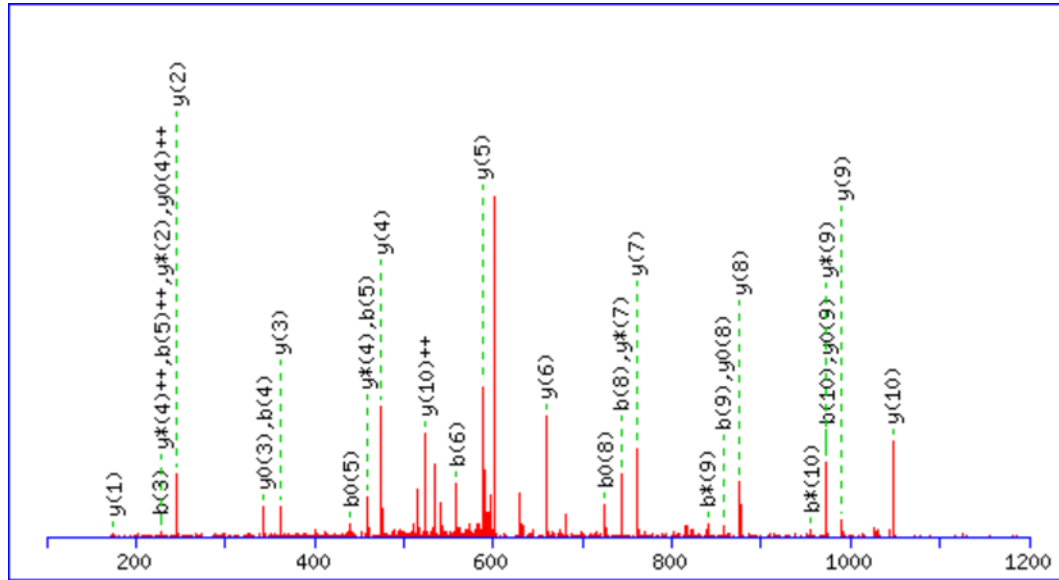

## Peptide View

MS/MS Fragmentation of **VVEQMCITQYER**

Found in **IPI00022284**, Tax\_Id=9606 Gene\_Symbol=PRNP Major prion protein

**Experiment:** 60 - PyE-3 **Fraction:** PyE-3

Match to Query 11272: 1554.717448 from(778.366000,2+)

Title: OECHL100317\_21.13258.13258.2.dta

Data file \\Boromir\masse\Data LTQ-Orbitrap\Chrystelle Lacroix\Etude clinique sJPU\OECHL100317\_21.raw

**Monoisotopic mass of neutral peptide Mr(calc):** 1554.717041 **Fixed modifications:** Carbamidomethyl (C) (apply to specified residues or termini only) **Ions**

**Score:** 70 **Expect:** 9.3e-006 **Matches :** 10/120 fragment ions using 13 most intense peaks ([help](#))

| # | b                 | b <sup>++</sup> | b <sup>*</sup> | b <sup>*++</sup> | b <sup>0</sup> | b <sup>0++</sup> | Seq. | y                  | y <sup>++</sup> | y <sup>*</sup> | y <sup>*++</sup> | y <sup>0</sup> | y <sup>0++</sup> |
|---|-------------------|-----------------|----------------|------------------|----------------|------------------|------|--------------------|-----------------|----------------|------------------|----------------|------------------|
| 1 | 100.075690        | 50.541483       |                |                  |                |                  | V    |                    |                 |                |                  |                |                  |
| 2 | 199.144104        | 100.075690      |                |                  |                |                  | V    | 1456.655914        | 728.831595      | 1439.629365    | 720.318321       | 1438.645349    | 719.8263         |
| 3 | <b>328.186697</b> | 164.596987      |                |                  | 310.176132     | 155.591704       | E    | <b>1357.587500</b> | 679.297388      | 1340.560951    | 670.784114       | 1339.576935    | 670.2921         |
| 4 | 456.245275        | 228.626276      | 439.218726     | 220.113001       | 438.234710     | 219.620993       | Q    | <b>1228.544907</b> | 614.776092      | 1211.518358    | 606.262817       | 1210.534342    | 605.7708         |
| 5 | 587.285760        | 294.146518      | 570.259211     | 285.633244       | 569.275195     | 285.141236       | M    | <b>1100.486329</b> | 550.746803      | 1083.459780    | 542.233528       | 1082.475764    | 541.7415         |

|    |             |            |             |            |             |            |   |            |            |            |            |            |          |
|----|-------------|------------|-------------|------------|-------------|------------|---|------------|------------|------------|------------|------------|----------|
| 6  | 747.316409  | 374.161843 | 730.289860  | 365.648568 | 729.305844  | 365.156560 | C | 969.445844 | 485.226560 | 952.419295 | 476.713286 | 951.435279 | 476.2212 |
| 7  | 860.400473  | 430.703875 | 843.373924  | 422.190600 | 842.389908  | 421.698592 | I | 809.415195 | 405.211236 | 792.388646 | 396.697961 | 791.404630 | 396.2059 |
| 8  | 961.448152  | 481.227714 | 944.421603  | 472.714440 | 943.437587  | 472.222432 | T | 696.331131 | 348.669204 | 679.304582 | 340.155929 | 678.320566 | 339.6639 |
| 9  | 1089.506730 | 545.257003 | 1072.480181 | 536.743729 | 1071.496165 | 536.251721 | Q | 595.283452 | 298.145364 | 578.256903 | 289.632090 | 577.272887 | 289.1400 |
| 10 | 1252.570059 | 626.788668 | 1235.543510 | 618.275393 | 1234.559494 | 617.783385 | Y | 467.224874 | 234.116075 | 450.198325 | 225.602801 | 449.214309 | 225.1107 |
| 11 | 1381.612652 | 691.309964 | 1364.586103 | 682.796690 | 1363.602087 | 682.304682 | E | 304.161545 | 152.584411 | 287.134996 | 144.071136 | 286.150980 | 143.5791 |
| 12 |             |            |             |            |             |            | R | 175.118952 | 88.063114  | 158.092403 | 79.549839  |            |          |

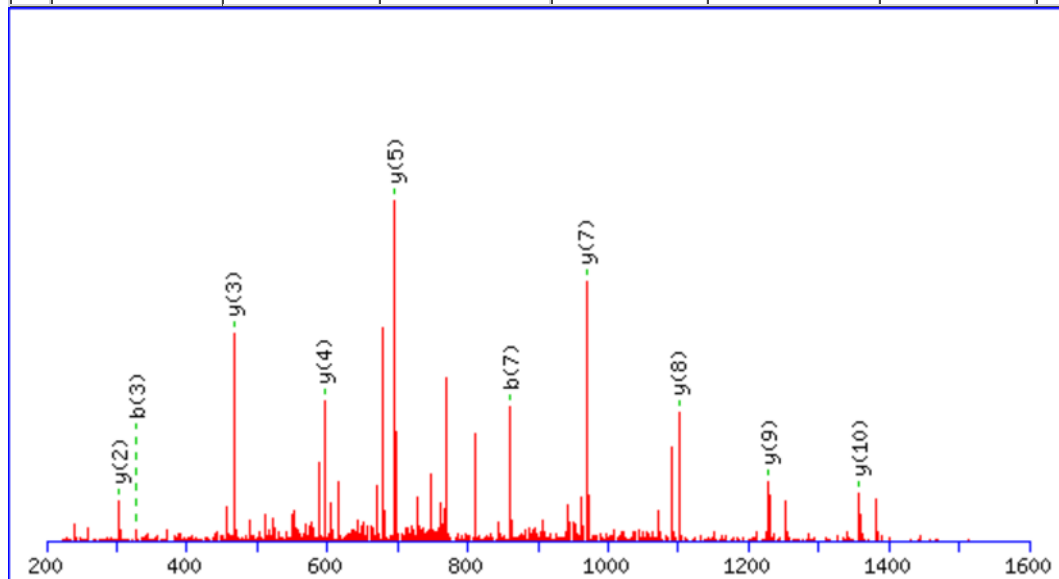

## Peptide View

MS/MS Fragmentation of **QAPQGLEWMGR**

Found in **IPI00009792**, Tax\_Id=9606 Gene\_Symbol=IGHV1OR15-1 Ig heavy chain V-I region V35

Experiment: 60 - PyE-3 Fraction: PyE-3

Match to Query 8842: 1328.629848 from(665.322200,2+)

Title: OECHL100317\_21.14985.14985.2.dta

Data file \\Boromir\masse\Data LTQ-Orbitrap\Chrystelle Lacroix\Etude clinique sJPU\OECHL100317\_21.raw

**Monoisotopic mass of neutral peptide Mr(calc): 1328.629547** Fixed modifications: Carbamidomethyl (C) (apply to specified residues or termini only) Ions

Score: 62 Expect: 6.7e-005 Matches : 26/110 fragment ions using 56 most intense peaks ([help](#))

| #  | b                  | b <sup>++</sup>   | b*                 | b* <sup>++</sup> | b <sup>0</sup> | b <sup>0++</sup> | Seq. | y                  | y <sup>++</sup>   | y*          | y* <sup>++</sup>  | y <sup>0</sup> | y <sup>0++</sup> |
|----|--------------------|-------------------|--------------------|------------------|----------------|------------------|------|--------------------|-------------------|-------------|-------------------|----------------|------------------|
| 1  | 129.065854         | 65.036565         | 112.039305         | 56.523291        |                |                  | Q    |                    |                   |             |                   |                |                  |
| 2  | <b>200.102968</b>  | 100.555122        | 183.076419         | 92.041848        |                |                  | A    | <b>1201.578255</b> | 601.292766        | 1184.551706 | <b>592.779491</b> | 1183.567690    | 592.2874         |
| 3  | 297.155732         | 149.081504        | 280.129183         | 140.568230       |                |                  | P    | <b>1130.541141</b> | <b>565.774208</b> | 1113.514592 | <b>557.260934</b> | 1112.530576    | <b>556.7689</b>  |
| 4  | <b>354.177196</b>  | 177.592236        | 337.150647         | 169.078961       |                |                  | G    | <b>1033.488377</b> | 517.247827        | 1016.461828 | 508.734552        | 1015.477812    | 508.2425         |
| 5  | 482.235774         | 241.621525        | <b>465.209225</b>  | 233.108251       |                |                  | Q    | <b>976.466913</b>  | <b>488.737095</b> | 959.440364  | 480.223820        | 958.456348     | 479.7318         |
| 6  | 539.257238         | 270.132257        | 522.230689         | 261.618983       |                |                  | G    | <b>848.408335</b>  | 424.707806        | 831.381786  | 416.194531        | 830.397770     | 415.7025         |
| 7  | 652.341302         | 326.674289        | 635.314753         | 318.161015       |                |                  | L    | <b>791.386871</b>  | 396.197074        | 774.360322  | 387.683799        | 773.376306     | 387.1917         |
| 8  | 781.383895         | 391.195586        | <b>764.357346</b>  | 382.682311       | 763.373330     | 382.190303       | E    | <b>678.302807</b>  | <b>339.655042</b> | 661.276258  | 331.141767        | 660.292242     | 330.6497         |
| 9  | <b>967.463208</b>  | 484.235242        | <b>950.436659</b>  | 475.721968       | 949.452643     | 475.229960       | W    | <b>549.260214</b>  | 275.133745        | 532.233665  | 266.620471        |                |                  |
| 10 | <b>1098.503693</b> | <b>549.755485</b> | <b>1081.477144</b> | 541.242210       | 1080.493128    | 540.750202       | M    | <b>363.180901</b>  | 182.094088        | 346.154352  | 173.580814        |                |                  |
| 11 | 1155.525157        | 578.266217        | <b>1138.498608</b> | 569.752942       | 1137.514592    | 569.260934       | G    | <b>232.140416</b>  | 116.573846        | 215.113867  | 108.060571        |                |                  |
| 12 |                    |                   |                    |                  |                |                  | R    | 175.118952         | 88.063114         | 158.092403  | 79.549839         |                |                  |

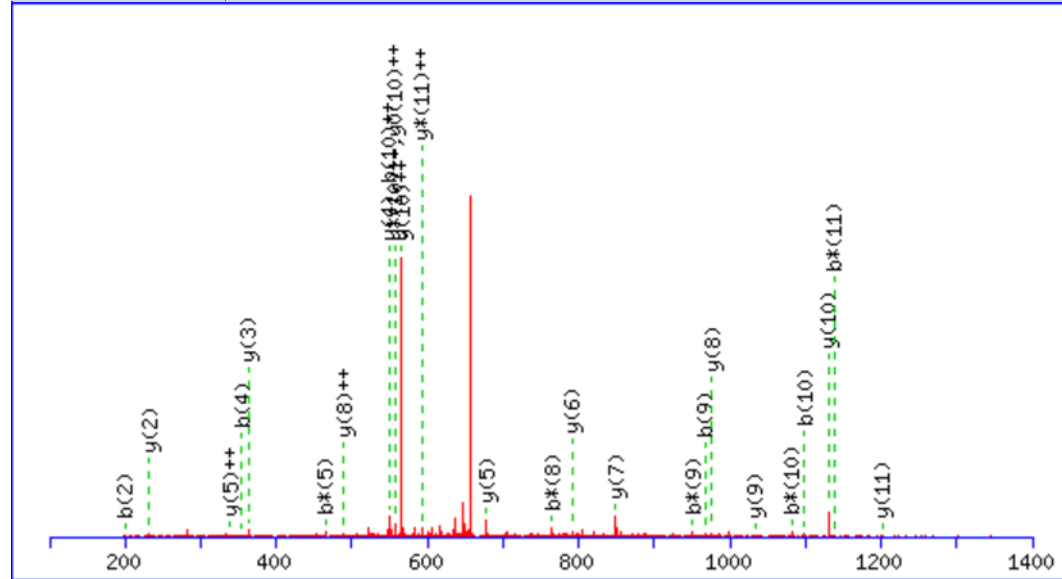

## Peptide View

MS/MS Fragmentation of **GLDTSLGAVQSDTGR**

Found in **IPI00289931**, Tax\_Id=9606 Gene\_Symbol=MADCAM1 MADCAM1 protein

Experiment: 60 - PyE-3 Fraction: PyE-3

Match to Query 10213: 1475.722648 from(738.868600,2+)

Title: OECHL100317\_21.11342.11342.2.dta

Data file \\Boromir\masse\Data LTQ-Orbitrap\Chrystelle Lacroix\Etude clinique sJPU\OECHL100317\_21.raw

**Monoisotopic mass of neutral peptide Mr(calc): 1475.721619** Fixed modifications: Carbamidomethyl (C) (apply to specified residues or termini only) **Ions**

**Score: 88 Expect: 2.3e-007** Matches : 32/142 fragment ions using 51 most intense peaks ([help](#))

| #  | b                  | b <sup>++</sup> | b*                 | b* <sup>++</sup> | b <sup>0</sup>    | b <sup>0++</sup> | Seq.     | y                  | y <sup>++</sup>   | y*          | y* <sup>++</sup>  | y <sup>0</sup> | y <sup>0++</sup> |
|----|--------------------|-----------------|--------------------|------------------|-------------------|------------------|----------|--------------------|-------------------|-------------|-------------------|----------------|------------------|
| 1  | 58.028740          | 29.518008       |                    |                  |                   |                  | <b>G</b> |                    |                   |             |                   |                |                  |
| 2  | 171.112804         | 86.060040       |                    |                  |                   |                  | <b>L</b> | 1419.707414        | 710.357345        | 1402.680865 | 701.844071        | 1401.696849    | 701.3520         |
| 3  | <b>286.139747</b>  | 143.573512      |                    |                  | 268.129182        | 134.568229       | <b>D</b> | 1306.623350        | 653.815313        | 1289.596801 | 645.302039        | 1288.612785    | <b>644.8100</b>  |
| 4  | <b>387.187426</b>  | 194.097351      |                    |                  | <b>369.176861</b> | 185.092069       | <b>T</b> | <b>1191.596407</b> | <b>596.301842</b> | 1174.569858 | <b>587.788567</b> | 1173.585842    | <b>587.2965</b>  |
| 5  | <b>474.219454</b>  | 237.613365      |                    |                  | <b>456.208889</b> | 228.608082       | <b>S</b> | <b>1090.548728</b> | 545.778002        | 1073.522179 | 537.264728        | 1072.538163    | 536.7727         |
| 6  | <b>587.303518</b>  | 294.155397      |                    |                  | <b>569.292953</b> | 285.150115       | <b>L</b> | <b>1003.516700</b> | 502.261988        | 986.490151  | 493.748714        | 985.506135     | 493.2567         |
| 7  | <b>644.324982</b>  | 322.666129      |                    |                  | 626.314417        | 313.660847       | <b>G</b> | <b>890.432636</b>  | 445.719956        | 873.406087  | 437.206682        | 872.422071     | 436.7146         |
| 8  | <b>715.362096</b>  | 358.184686      |                    |                  | <b>697.351531</b> | 349.179404       | <b>A</b> | <b>833.411172</b>  | 417.209224        | 816.384623  | 408.695950        | 815.400607     | 408.2039         |
| 9  | <b>814.430510</b>  | 407.718893      |                    |                  | 796.419945        | 398.713611       | <b>V</b> | <b>762.374058</b>  | 381.690667        | 745.347509  | 373.177393        | 744.363493     | 372.6853         |
| 10 | <b>942.489088</b>  | 471.748182      | 925.462539         | 463.234908       | 924.478523        | 462.742900       | <b>Q</b> | <b>663.305644</b>  | 332.156460        | 646.279095  | 323.643186        | 645.295079     | 323.1511         |
| 11 | <b>1029.521116</b> | 515.264196      | 1012.494567        | 506.750922       | 1011.510551       | 506.258914       | <b>S</b> | <b>535.247066</b>  | 268.127171        | 518.220517  | 259.613897        | 517.236501     | 259.1218         |
| 12 | <b>1144.548059</b> | 572.777668      | 1127.521510        | 564.264393       | 1126.537494       | 563.772385       | <b>D</b> | <b>448.215038</b>  | 224.611157        | 431.188489  | 216.097882        | 430.204473     | 215.6058         |
| 13 | <b>1245.595738</b> | 623.301507      | <b>1228.569189</b> | 614.788233       | 1227.585173       | 614.296225       | <b>T</b> | <b>333.188095</b>  | 167.097685        | 316.161546  | 158.584411        | 315.177530     | 158.0924         |
| 14 | <b>1302.617202</b> | 651.812239      | 1285.590653        | 643.298965       | 1284.606637       | 642.806957       | <b>G</b> | <b>232.140416</b>  | 116.573846        | 215.113867  | 108.060571        |                |                  |
| 15 |                    |                 |                    |                  |                   |                  | <b>R</b> | 175.118952         | 88.063114         | 158.092403  | 79.549839         |                |                  |

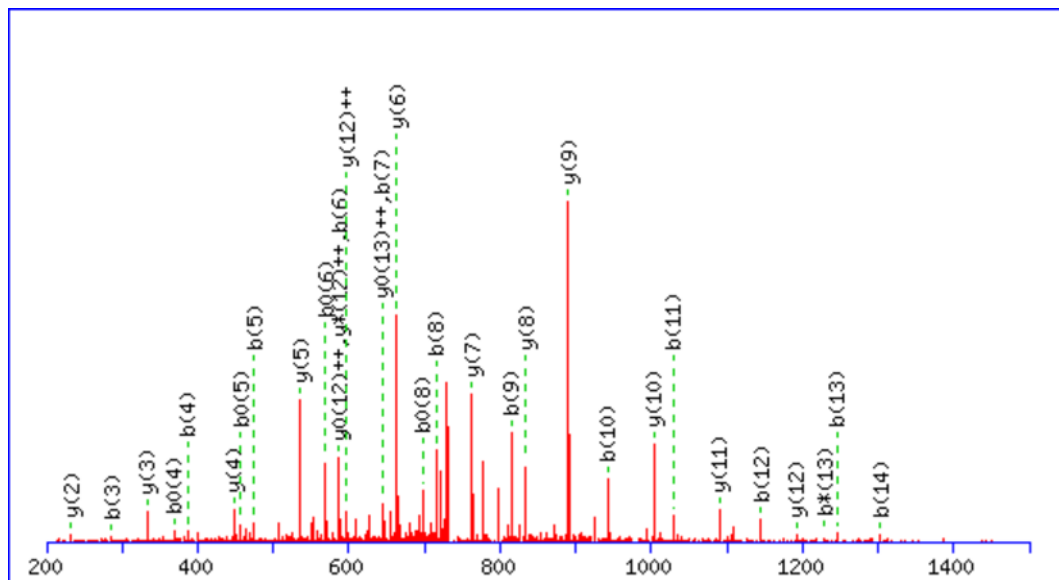

## Peptide View

MS/MS Fragmentation of **AVGLLTVISK**

Found in **IPI00013446**, Tax\_Id=9606 Gene\_Symbol=PSCA Prostate stem cell antigen

**Experiment:** 60 - PyE-3 **Fraction:** PyE-3

Match to Query 4012: 999.632448 from(500.823500,2+)

Title: OECHL100317\_21.17050.17050.2.dta

Data file \\Boromir\masse\Data LTQ-Orbitrap\Chrystelle Lacroix\Etude clinique sJPU\OECHL100317\_21.raw

**Monoisotopic mass of neutral peptide Mr(calc):** 999.632828 **Fixed modifications:** Carbamidomethyl (C) (apply to specified residues or termini only) **Ions Score:**

59 **Expect:** 1.4e-005 **Matches :** 13/78 fragment ions using 26 most intense peaks ([help](#))

| # | b                 | b <sup>++</sup>   | b <sup>0</sup> | b <sup>0++</sup> | Seq. | y                 | y <sup>++</sup> | y <sup>*</sup> | y <sup>*++</sup> | y <sup>0</sup> | y <sup>0++</sup> | #  |
|---|-------------------|-------------------|----------------|------------------|------|-------------------|-----------------|----------------|------------------|----------------|------------------|----|
| 1 | 72.044390         | 36.525833         |                |                  | A    |                   |                 |                |                  |                |                  | 10 |
| 2 | <b>171.112804</b> | 86.060040         |                |                  | V    | 929.602995        | 465.305136      | 912.576446     | 456.791861       | 911.592430     | 456.299853       | 9  |
| 3 | <b>228.134268</b> | 114.570772        |                |                  | G    | <b>830.534581</b> | 415.770929      | 813.508032     | 407.257654       | 812.524016     | 406.765646       | 8  |
| 4 | <b>341.218332</b> | <b>171.112804</b> |                |                  | L    | 773.513117        | 387.260197      | 756.486568     | 378.746922       | 755.502552     | 378.254914       | 7  |
| 5 | <b>454.302396</b> | 227.654836        |                |                  | L    | <b>660.429053</b> | 330.718165      | 643.402504     | 322.204890       | 642.418488     | 321.712882       | 6  |

|    |            |            |            |            |   |            |            |            |            |            |            |   |
|----|------------|------------|------------|------------|---|------------|------------|------------|------------|------------|------------|---|
| 6  | 555.350075 | 278.178676 | 537.339510 | 269.173393 | T | 547.344989 | 274.176133 | 530.318440 | 265.662858 | 529.334424 | 265.170850 | 5 |
| 7  | 654.418489 | 327.712883 | 636.407924 | 318.707600 | V | 446.297310 | 223.652293 | 429.270761 | 215.139018 | 428.286745 | 214.647010 | 4 |
| 8  | 767.502553 | 384.254915 | 749.491988 | 375.249632 | I | 347.228896 | 174.118086 | 330.202347 | 165.604811 | 329.218331 | 165.112803 | 3 |
| 9  | 854.534581 | 427.770929 | 836.524016 | 418.765646 | S | 234.144832 | 117.576054 | 217.118283 | 109.062779 | 216.134267 | 108.570771 | 2 |
| 10 |            |            |            |            | K | 147.112804 | 74.060040  | 130.086255 | 65.546765  |            |            | 1 |

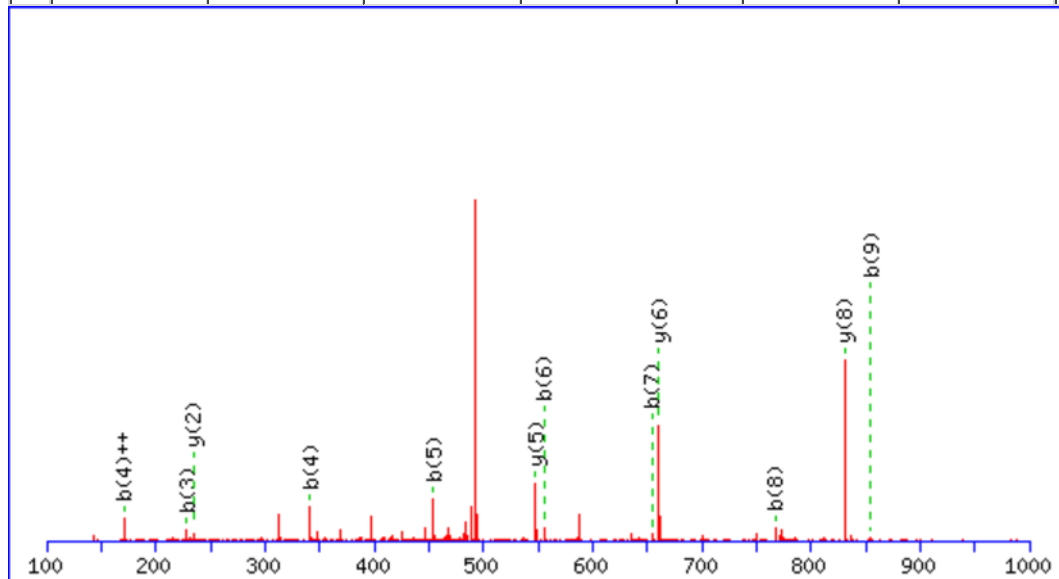

## Peptide View

MS/MS Fragmentation of **IESVLSSGKR**

Found in **IPI00018236**, Tax\_Id=9606 Gene\_Symbol=GM2A Ganglioside GM2 activator

Experiment: 60 - PyE-3 Fraction: PyE-3

Match to Query 6542: 1161.637048 from(581.825800,2+)

Title: OECHL100317\_21.5011.5011.2.dta

Data file \\Boromir\masse\Data LTQ-Orbitrap\Chrystelle Lacroix\Etude clinique sJPU\OECHL100317\_21.raw

**Monoisotopic mass of neutral peptide Mr(calc):** 1161.635330 **Fixed modifications:** Carbamidomethyl (C) (apply to specified residues or termini only) **Ions**

**Score:** 61 **Expect:** 6.1e-005 **Matches :** 28/94 fragment ions using 37 most intense peaks ([help](#))

| # | b | b <sup>++</sup> | b* | b <sup>*++</sup> | b <sup>0</sup> | b <sup>0++</sup> | Seq. | y | y <sup>++</sup> | y* | y <sup>*++</sup> | y <sup>0</sup> | y <sup>0++</sup> |
|---|---|-----------------|----|------------------|----------------|------------------|------|---|-----------------|----|------------------|----------------|------------------|
|---|---|-----------------|----|------------------|----------------|------------------|------|---|-----------------|----|------------------|----------------|------------------|



|    |                   |                   |            |            |                   |            |   |                    |                   |                   |                   |                   |                   |  |
|----|-------------------|-------------------|------------|------------|-------------------|------------|---|--------------------|-------------------|-------------------|-------------------|-------------------|-------------------|--|
| 1  | 114.091340        | 57.549308         |            |            |                   |            |   | I                  |                   |                   |                   |                   |                   |  |
| 2  | <b>243.133933</b> | 122.070605        |            |            | 225.123368        | 113.065322 | E | <b>1049.558562</b> | <b>525.282919</b> | 1032.532013       | 516.769645        | 1031.547997       | <b>516.277637</b> |  |
| 3  | <b>330.165961</b> | 165.586618        |            |            | <b>312.155396</b> | 156.581336 | S | <b>920.515969</b>  | <b>460.761623</b> | <b>903.489420</b> | <b>452.248348</b> | <b>902.505404</b> | <b>451.756340</b> |  |
| 4  | 429.234375        | <b>215.120826</b> |            |            | <b>411.223810</b> | 206.115543 | V | <b>833.483941</b>  | 417.245609        | 816.457392        | 408.732334        | 815.473376        | 408.240326        |  |
| 5  | 542.318439        | 271.662858        |            |            | 524.307874        | 262.657575 | L | <b>734.415527</b>  | <b>367.711402</b> | 717.388978        | 359.198127        | <b>716.404962</b> | 358.706119        |  |
| 6  | 629.350467        | 315.178872        |            |            | 611.339902        | 306.173589 | S | <b>621.331463</b>  | 311.169370        | 604.304914        | 302.656095        | <b>603.320898</b> | 302.164087        |  |
| 7  | <b>716.382495</b> | 358.694886        |            |            | 698.371930        | 349.689603 | S | <b>534.299435</b>  | 267.653356        | 517.272886        | 259.140081        | <b>516.288870</b> | 258.648073        |  |
| 8  | 803.414523        | 402.210899        |            |            | 785.403958        | 393.205617 | S | <b>447.267407</b>  | 224.137342        | 430.240858        | <b>215.624067</b> | 429.256842        | <b>215.132059</b> |  |
| 9  | 860.435987        | 430.721632        |            |            | 842.425422        | 421.716349 | G | <b>360.235379</b>  | 180.621328        | 343.208830        | 172.108053        |                   |                   |  |
| 10 | <b>988.530950</b> | 494.769113        | 971.504401 | 486.255838 | 970.520385        | 485.763830 | K | 303.213915         | 152.110596        | 286.187366        | 143.597321        |                   |                   |  |
| 11 |                   |                   |            |            |                   |            | R | 175.118952         | 88.063114         | 158.092403        | 79.549840         |                   |                   |  |

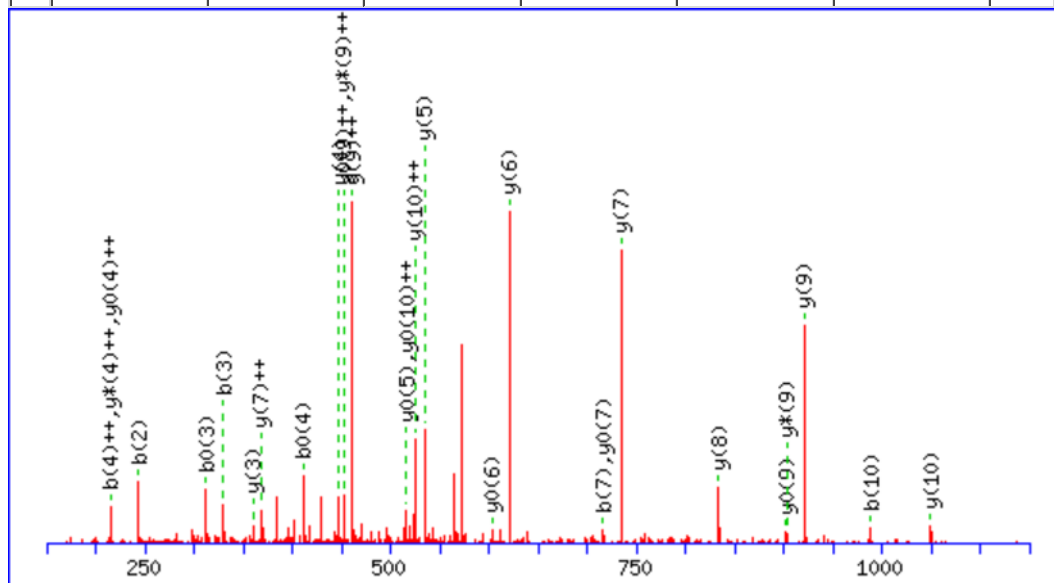

## Peptide View

MS/MS Fragmentation of **VSISTLNKR**

Found in **IPI00176221**, Tax\_Id=9606 Gene\_Symbol=NEGR1 Neuronal growth regulator 1

**Experiment:** 60 - PyE-3 **Fraction:** PyE-3

Match to Query 4387: 1016.597848 from(509.306200,2+)

Title: OECHL100317\_21.6067.6067.2.dta

Data file \\Boromir\masse\Data LTQ-Orbitrap\Chrystelle Lacroix\Etude clinique sJPU\OECHL100317\_21.raw

**Monoisotopic mass of neutral peptide Mr(calc):** 1016.597824**Fixed modifications:** Carbamidomethyl (C) (apply to specified residues or termini only)**Ions****Score:** 56 **Expect:** 7.1e-005**Matches :** 17/74 fragment ions using 34 most intense peaks ([help](#))

| # | b                 | b <sup>++</sup> | b*         | b <sup>*++</sup> | b <sup>0</sup>    | b <sup>0++</sup> | Seq. | y                 | y <sup>++</sup>   | y*         | y <sup>*++</sup>  | y <sup>0</sup> | y <sup>0++</sup>  | # |
|---|-------------------|-----------------|------------|------------------|-------------------|------------------|------|-------------------|-------------------|------------|-------------------|----------------|-------------------|---|
| 1 | 100.075690        | 50.541483       |            |                  |                   |                  | V    |                   |                   |            |                   |                |                   | 9 |
| 2 | <b>187.107718</b> | 94.057497       |            |                  | 169.097153        | 85.052214        | S    | <b>918.536705</b> | <b>459.771991</b> | 901.510156 | <b>451.258716</b> | 900.526140     | <b>450.766708</b> | 8 |
| 3 | 300.191782        | 150.599529      |            |                  | <b>282.181217</b> | 141.594247       | I    | <b>831.504677</b> | <b>416.255977</b> | 814.478128 | 407.742702        | 813.494112     | 407.250694        | 7 |
| 4 | 387.223810        | 194.115543      |            |                  | 369.213245        | 185.110261       | S    | <b>718.420613</b> | <b>359.713945</b> | 701.394064 | 351.200670        | 700.410048     | 350.708662        | 6 |
| 5 | 488.271489        | 244.639383      |            |                  | 470.260924        | 235.634100       | T    | <b>631.388585</b> | <b>316.197931</b> | 614.362036 | 307.684656        | 613.378020     | 307.192648        | 5 |
| 6 | 601.355553        | 301.181415      |            |                  | 583.344988        | 292.176132       | L    | <b>530.340906</b> | 265.674091        | 513.314357 | 257.160817        |                |                   | 4 |
| 7 | 715.398480        | 358.202878      | 698.371931 | 349.689604       | 697.387915        | 349.197596       | N    | <b>417.256842</b> | 209.132059        | 400.230293 | 200.618784        |                |                   | 3 |
| 8 | <b>843.493443</b> | 422.250360      | 826.466894 | 413.737085       | 825.482878        | 413.245077       | K    | <b>303.213915</b> | 152.110595        | 286.187366 | 143.597321        |                |                   | 2 |
| 9 |                   |                 |            |                  |                   |                  | R    | <b>175.118952</b> | 88.063114         | 158.092403 | 79.549839         |                |                   | 1 |

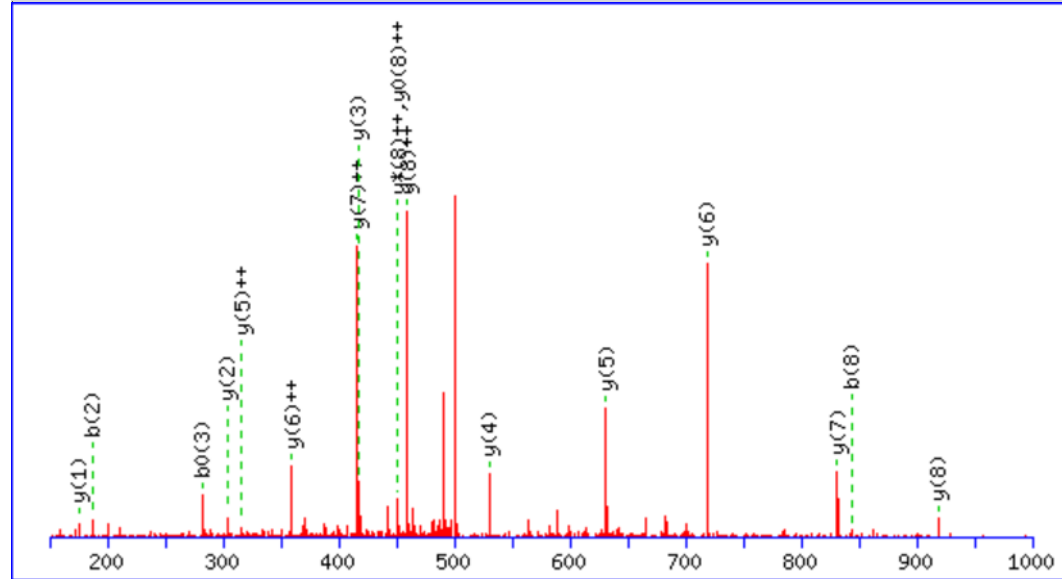

## Peptide View

MS/MS Fragmentation of **GQLPISVTCTIADEIGAR**Found in **IPI00240345**, Tax\_Id=9606 Gene\_Symbol=CLEC14A C-type lectin domain family 14 member A**Experiment:** 60 - PyE-3 **Fraction:** PyE-3

Match to Query 13459: 1798.924848 from(900.469700,2+)

Title: OECHL100317\_21.19710.19710.2.dta

Data file \\Boromir\masse\Data LTQ-Orbitrap\Chrystelle Lacroix\Etude clinique sJPU\OECHL100317\_21.raw

**Monoisotopic mass of neutral peptide Mr(calc):** 1798.924728**Fixed modifications:** Carbamidomethyl (C) (apply to specified residues or termini only)**Ions****Score:** 65 **Expect:** 4.4e-005**Matches :** 27/172 fragment ions using 60 most intense peaks ([help](#))

| #  | b                  | b <sup>++</sup>   | b*                | b <sup>*++</sup> | b <sup>0</sup>     | b <sup>0++</sup> | Seq. | y                  | y <sup>++</sup>   | y*          | y <sup>*++</sup> | y <sup>0</sup> | y <sup>0++</sup> |
|----|--------------------|-------------------|-------------------|------------------|--------------------|------------------|------|--------------------|-------------------|-------------|------------------|----------------|------------------|
| 1  | 58.028740          | 29.518008         |                   |                  |                    |                  | G    |                    |                   |             |                  |                |                  |
| 2  | 186.087318         | 93.547297         | 169.060769        | 85.034023        |                    |                  | Q    | 1742.910548        | 871.958912        | 1725.883999 | 863.445638       | 1724.899983    | 862.9536         |
| 3  | <b>299.171382</b>  | 150.089329        | 282.144833        | 141.576055       |                    |                  | L    | <b>1614.851970</b> | <b>807.929623</b> | 1597.825421 | 799.416349       | 1596.841405    | 798.9243         |
| 4  | 396.224146         | 198.615711        | 379.197597        | 190.102436       |                    |                  | P    | <b>1501.767906</b> | <b>751.387591</b> | 1484.741357 | 742.874317       | 1483.757341    | 742.3823         |
| 5  | <b>509.308210</b>  | 255.157743        | <b>492.281661</b> | 246.644468       |                    |                  | I    | <b>1404.715142</b> | 702.861209        | 1387.688593 | 694.347935       | 1386.704577    | 693.8559         |
| 6  | <b>596.340238</b>  | <b>298.673757</b> | 579.313689        | 290.160483       | 578.329673         | 289.668475       | S    | <b>1291.631078</b> | 646.319177        | 1274.604529 | 637.805903       | 1273.620513    | 637.3138         |
| 7  | <b>695.408652</b>  | 348.207964        | 678.382103        | 339.694689       | 677.398087         | 339.202681       | V    | <b>1204.599050</b> | 602.803163        | 1187.572501 | 594.289889       | 1186.588485    | 593.7978         |
| 8  | 796.456331         | 398.731804        | 779.429782        | 390.218529       | 778.445766         | 389.726521       | T    | <b>1105.530636</b> | 553.268956        | 1088.504087 | 544.755682       | 1087.520071    | 544.2636         |
| 9  | 956.486980         | 478.747128        | 939.460431        | 470.233854       | 938.476415         | 469.741846       | C    | <b>1004.482957</b> | 502.745117        | 987.456408  | 494.231842       | 986.472392     | 493.7398         |
| 10 | <b>1069.571044</b> | 535.289160        | 1052.544495       | 526.775886       | 1051.560479        | 526.283878       | I    | 844.452308         | 422.729792        | 827.425759  | 414.216518       | 826.441743     | 413.7245         |
| 11 | 1140.608158        | 570.807717        | 1123.581609       | 562.294443       | 1122.597593        | 561.802435       | A    | <b>731.368244</b>  | 366.187760        | 714.341695  | 357.674486       | 713.357679     | 357.1824         |
| 12 | <b>1255.635101</b> | 628.321189        | 1238.608552       | 619.807914       | <b>1237.624536</b> | 619.315906       | D    | <b>660.331130</b>  | 330.669203        | 643.304581  | 322.155929       | 642.320565     | 321.6639         |
| 13 | <b>1384.677694</b> | 692.842485        | 1367.651145       | 684.329211       | 1366.667129        | 683.837203       | E    | <b>545.304187</b>  | 273.155732        | 528.277638  | 264.642457       | 527.293622     | 264.1504         |
| 14 | <b>1497.761758</b> | 749.384517        | 1480.735209       | 740.871243       | 1479.751193        | 740.379235       | I    | <b>416.261594</b>  | 208.634435        | 399.235045  | 200.121160       |                |                  |
| 15 | <b>1554.783222</b> | 777.895249        | 1537.756673       | 769.381975       | 1536.772657        | 768.889967       | G    | <b>303.177530</b>  | 152.092403        | 286.150981  | 143.579128       |                |                  |
| 16 | <b>1625.820336</b> | 813.413806        | 1608.793787       | 804.900532       | 1607.809771        | 804.408524       | A    | 246.156066         | 123.581671        | 229.129517  | 115.068396       |                |                  |
| 17 |                    |                   |                   |                  |                    |                  | R    | 175.118952         | 88.063114         | 158.092403  | 79.549839        |                |                  |

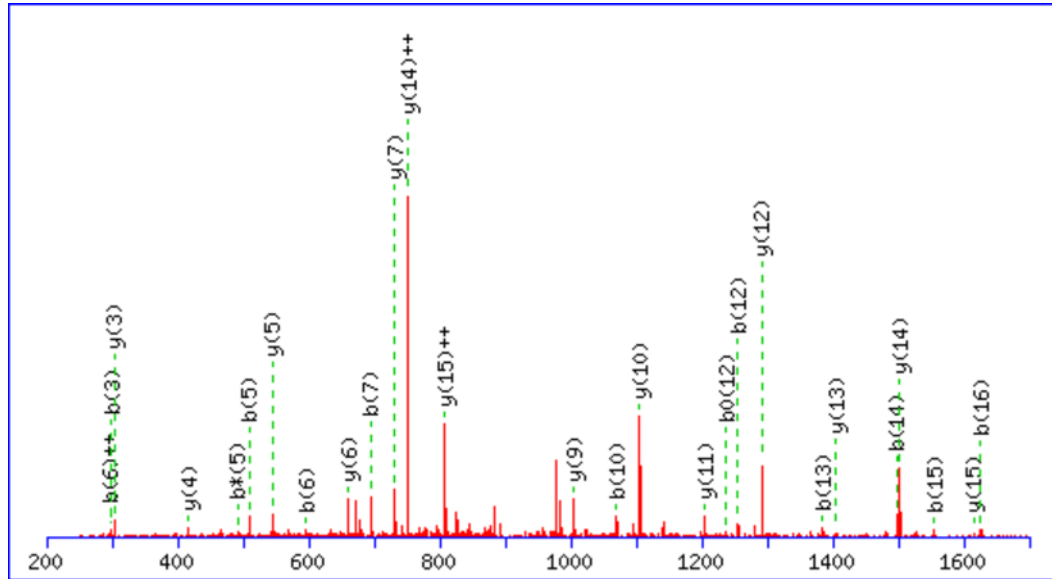

## Peptide View

MS/MS Fragmentation of **ASGVPDFRFGSGSGTDFTLK**

Found in **IPI00387107**, Tax\_Id=9606 Gene\_Symbol=IGKV2-40 Ig kappa chain V-II region Cum

**Experiment:** 60 - PyE-3 **Fraction:** PyE-3

Match to Query 14618: 1984.950248 from(993.482400,2+)

Title: OECHL100317\_21.13660.13660.2.dta

Data file \\Boromir\masse\Data LTQ-Orbitrap\Chrystelle Lacroix\Etude clinique sJPU\OECHL100317\_21.raw

**Monoisotopic mass of neutral peptide Mr(calc):** 1984.949066 **Fixed modifications:** Carbamidomethyl (C) (apply to specified residues or termini only) **Ions**

**Score:** 61 **Expect:** 0.00012 **Matches :** 35/210 fragment ions using 64 most intense peaks ([help](#))

| # | b                 | b <sup>++</sup> | b* | b <sup>*++</sup> | b <sup>0</sup> | b <sup>0++</sup> | Seq. | y                  | y <sup>++</sup>   | y*          | y <sup>*++</sup>  | y <sup>0</sup> | y <sup>0++</sup> |
|---|-------------------|-----------------|----|------------------|----------------|------------------|------|--------------------|-------------------|-------------|-------------------|----------------|------------------|
| 1 | 72.044390         | 36.525833       |    |                  |                |                  | A    |                    |                   |             |                   |                |                  |
| 2 | 159.076418        | 80.041847       |    |                  | 141.065853     | 71.036564        | S    | 1914.919197        | 957.963236        | 1897.892648 | 949.449962        | 1896.908632    | 948.9579         |
| 3 | 216.097882        | 108.552579      |    |                  | 198.087317     | 99.547296        | G    | 1827.887169        | 914.447222        | 1810.860620 | 905.933948        | 1809.876604    | 905.4419         |
| 4 | <b>315.166296</b> | 158.086786      |    |                  | 297.155731     | 149.081504       | V    | 1770.865705        | 885.936490        | 1753.839156 | 877.423216        | 1752.855140    | 876.9312         |
| 5 | 412.219060        | 206.613168      |    |                  | 394.208495     | 197.607885       | P    | <b>1671.797291</b> | <b>836.402283</b> | 1654.770742 | <b>827.889009</b> | 1653.786726    | <b>827.3970</b>  |

|    |                    |            |                    |                   |                    |                   |   |                    |                   |             |            |                   |          |
|----|--------------------|------------|--------------------|-------------------|--------------------|-------------------|---|--------------------|-------------------|-------------|------------|-------------------|----------|
| 6  | 527.246003         | 264.126640 |                    |                   | 509.235438         | 255.121357        | D | 1574.744527        | 787.875902        | 1557.717978 | 779.362627 | 1556.733962       | 778.8706 |
| 7  | <b>683.347114</b>  | 342.177195 | 666.320565         | 333.663920        | 665.336549         | 333.171912        | R | 1459.717584        | <b>730.362430</b> | 1442.691035 | 721.849156 | 1441.707019       | 721.3571 |
| 8  | 830.415528         | 415.711402 | 813.388979         | 407.198127        | 812.404963         | <b>406.706119</b> | F | <b>1303.616473</b> | 652.311875        | 1286.589924 | 643.798600 | 1285.605908       | 643.3065 |
| 9  | 917.447556         | 459.227416 | 900.421007         | 450.714141        | 899.436991         | 450.222133        | S | <b>1156.548059</b> | 578.777668        | 1139.521510 | 570.264393 | 1138.537494       | 569.7723 |
| 10 | 974.469020         | 487.738148 | 957.442471         | 479.224873        | 956.458455         | 478.732865        | G | <b>1069.516031</b> | 535.261654        | 1052.489482 | 526.748379 | 1051.505466       | 526.2563 |
| 11 | <b>1061.501048</b> | 531.254162 | 1044.474499        | 522.740887        | 1043.490483        | 522.248879        | S | <b>1012.494567</b> | 506.750922        | 995.468018  | 498.237647 | 994.484002        | 497.7456 |
| 12 | <b>1118.522512</b> | 559.764894 | 1101.495963        | 551.251619        | 1100.511947        | 550.759611        | G | 925.462539         | 463.234908        | 908.435990  | 454.721633 | 907.451974        | 454.2296 |
| 13 | <b>1205.554540</b> | 603.280908 | 1188.527991        | 594.767633        | 1187.543975        | 594.275625        | S | 868.441075         | 434.724176        | 851.414526  | 426.210901 | <b>850.430510</b> | 425.7188 |
| 14 | <b>1262.576004</b> | 631.791640 | 1245.549455        | <b>623.278365</b> | 1244.565439        | 622.786357        | G | <b>781.409047</b>  | 391.208162        | 764.382498  | 382.694887 | 763.398482        | 382.2028 |
| 15 | <b>1363.623683</b> | 682.315479 | 1346.597134        | 673.802205        | 1345.613118        | 673.310197        | T | 724.387583         | 362.697430        | 707.361034  | 354.184155 | 706.377018        | 353.6921 |
| 16 | <b>1478.650626</b> | 739.828951 | 1461.624077        | <b>731.315677</b> | <b>1460.640061</b> | <b>730.823668</b> | D | <b>623.339904</b>  | 312.173590        | 606.313355  | 303.660316 | 605.329339        | 303.1683 |
| 17 | <b>1625.719040</b> | 813.363158 | 1608.692491        | 804.849884        | 1607.708475        | 804.357875        | F | <b>508.312961</b>  | 254.660118        | 491.286412  | 246.146844 | <b>490.302396</b> | 245.6548 |
| 18 | <b>1726.766719</b> | 863.886998 | <b>1709.740170</b> | 855.373723        | <b>1708.756154</b> | 854.881715        | T | <b>361.244547</b>  | 181.125911        | 344.217998  | 172.612637 | 343.233982        | 172.1206 |
| 19 | <b>1839.850783</b> | 920.429029 | 1822.824234        | 911.915755        | 1821.840218        | 911.423747        | L | 260.196868         | 130.602072        | 243.170319  | 122.088797 |                   |          |
| 20 |                    |            |                    |                   |                    |                   | K | 147.112804         | 74.060040         | 130.086255  | 65.546765  |                   |          |

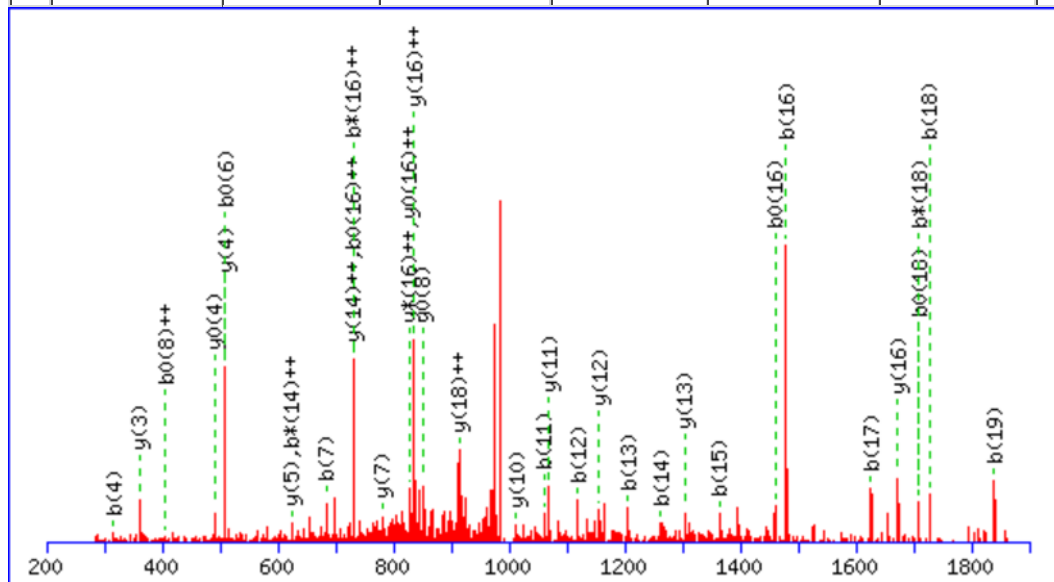

## Peptide View

MS/MS Fragmentation of **ASFENNCEIGCFAK**

Found in **IPI00010105**, Tax\_Id=9606 Gene\_Symbol=EIF6 Eukaryotic translation initiation factor 6

Experiment: 60 - PyE-3 Fraction: PyE-3

Match to Query 12252: 1645.688648 from(823.851600,2+)

Title: OECHL100317\_21.13765.13765.2.dta

Data file \\Boromir\masse\Data LTQ-Orbitrap\Chrystelle Lacroix\Etude clinique sJPU\OECHL100317\_21.raw

**Monoisotopic mass of neutral peptide Mr(calc): 1645.686462** Fixed modifications: Carbamidomethyl (C) (apply to specified residues or termini only) Ions

Score: 57 Expect: 6.5e-005 Matches : 11/134 fragment ions using 14 most intense peaks ([help](#))

| #  | b           | b <sup>++</sup> | b*          | b* <sup>++</sup> | b <sup>0</sup> | b <sup>0++</sup> | Seq. | y           | y <sup>++</sup> | y*          | y* <sup>++</sup> | y <sup>0</sup> | y <sup>0++</sup> |
|----|-------------|-----------------|-------------|------------------|----------------|------------------|------|-------------|-----------------|-------------|------------------|----------------|------------------|
| 1  | 72.044390   | 36.525833       |             |                  |                |                  | A    |             |                 |             |                  |                |                  |
| 2  | 159.076418  | 80.041847       |             |                  | 141.065853     | 71.036564        | S    | 1575.656640 | 788.331958      | 1558.630091 | 779.818684       | 1557.646075    | 779.3266         |
| 3  | 306.144832  | 153.576054      |             |                  | 288.134267     | 144.570772       | F    | 1488.624612 | 744.815944      | 1471.598063 | 736.302670       | 1470.614047    | 735.8106         |
| 4  | 435.187425  | 218.097351      |             |                  | 417.176860     | 209.092068       | E    | 1341.556198 | 671.281737      | 1324.529649 | 662.768463       | 1323.545633    | 662.2764         |
| 5  | 549.230352  | 275.118814      | 532.203803  | 266.605540       | 531.219787     | 266.113532       | N    | 1212.513605 | 606.760441      | 1195.487056 | 598.247166       | 1194.503040    | 597.7551         |
| 6  | 663.273279  | 332.140278      | 646.246730  | 323.627003       | 645.262714     | 323.134995       | N    | 1098.470678 | 549.738977      | 1081.444129 | 541.225703       | 1080.460113    | 540.7336         |
| 7  | 823.303928  | 412.155602      | 806.277379  | 403.642328       | 805.293363     | 403.150320       | C    | 984.427751  | 492.717514      | 967.401202  | 484.204239       | 966.417186     | 483.7122         |
| 8  | 952.346521  | 476.676899      | 935.319972  | 468.163624       | 934.335956     | 467.671616       | E    | 824.397102  | 412.702189      | 807.370553  | 404.188915       | 806.386537     | 403.6969         |
| 9  | 1065.430585 | 533.218931      | 1048.404036 | 524.705656       | 1047.420020    | 524.213648       | I    | 695.354509  | 348.180893      | 678.327960  | 339.667618       |                |                  |
| 10 | 1122.452049 | 561.729663      | 1105.425500 | 553.216388       | 1104.441484    | 552.724380       | G    | 582.270445  | 291.638861      | 565.243896  | 283.125586       |                |                  |
| 11 | 1282.482698 | 641.744987      | 1265.456149 | 633.231713       | 1264.472133    | 632.739705       | C    | 525.248981  | 263.128129      | 508.222432  | 254.614854       |                |                  |
| 12 | 1429.551112 | 715.279194      | 1412.524563 | 706.765920       | 1411.540547    | 706.273912       | F    | 365.218332  | 183.112804      | 348.191783  | 174.599530       |                |                  |
| 13 | 1500.588226 | 750.797751      | 1483.561677 | 742.284477       | 1482.577661    | 741.792469       | A    | 218.149918  | 109.578597      | 201.123369  | 101.065322       |                |                  |
| 14 |             |                 |             |                  |                |                  | K    | 147.112804  | 74.060040       | 130.086255  | 65.546765        |                |                  |

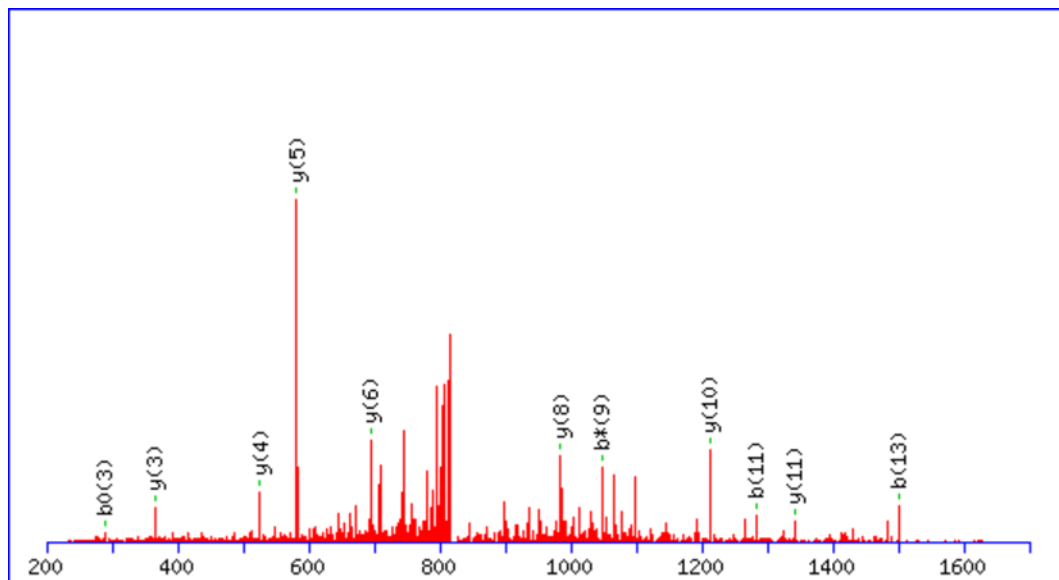

## Peptide View

MS/MS Fragmentation of **LLYDASNLETGVPSR**

Found in **IPI00003111**, Tax\_Id=9606 Gene\_Symbol=LOC652694 Ig kappa chain V-I region AU

**Experiment:** 60 - PyE-3 **Fraction:** PyE-3

Match to Query 13181: 1746.915648 from(874.465100,2+)

Title: OECHL100317\_21.16894.16894.2.dta

Data file \\Boromir\masse\Data LTQ-Orbitrap\Chrystelle Lacroix\Etude clinique sJPU\OECHL100317\_21.raw

**Monoisotopic mass of neutral peptide Mr(calc):** 1746.915192 **Fixed modifications:** Carbamidomethyl (C) (apply to specified residues or termini only) **Ions**

**Score:** 53 **Expect:** 0.00055 **Matches :** 38/156 fragment ions using 101 most intense peaks ([help](#))

| # | b          | b <sup>++</sup> | b* | b <sup>*++</sup> | b <sup>0</sup> | b <sup>0++</sup> | Seq. | y           | y <sup>++</sup> | y*          | y <sup>*++</sup> | y <sup>0</sup> | y <sup>0++</sup> |
|---|------------|-----------------|----|------------------|----------------|------------------|------|-------------|-----------------|-------------|------------------|----------------|------------------|
| 1 | 114.091340 | 57.549308       |    |                  |                |                  | L    |             |                 |             |                  |                |                  |
| 2 | 227.175404 | 114.091340      |    |                  |                |                  | L    | 1634.838427 | 817.922852      | 1617.811878 | 809.409577       | 1616.827862    | 808.9175         |
| 3 | 340.259468 | 170.633372      |    |                  |                |                  | I    | 1521.754363 | 761.380820      | 1504.727814 | 752.867545       | 1503.743798    | 752.3755         |
| 4 | 503.322797 | 252.165036      |    |                  |                |                  | Y    | 1408.670299 | 704.838788      | 1391.643750 | 696.325513       | 1390.659734    | 695.8335         |
| 5 | 618.349740 | 309.678508      |    |                  | 600.339175     | 300.673226       | D    | 1245.606970 | 623.307123      | 1228.580421 | 614.793849       | 1227.596405    | 614.3018         |

|    |                    |                   |                    |            |                    |                   |   |                    |            |                   |            |                   |          |
|----|--------------------|-------------------|--------------------|------------|--------------------|-------------------|---|--------------------|------------|-------------------|------------|-------------------|----------|
| 6  | <b>689.386854</b>  | 345.197065        |                    |            | 671.376289         | 336.191782        | A | <b>1130.580027</b> | 565.793652 | 1113.553478       | 557.280377 | 1112.569462       | 556.7883 |
| 7  | 776.418882         | 388.713079        |                    |            | 758.408317         | 379.707796        | S | <b>1059.542913</b> | 530.275095 | 1042.516364       | 521.761820 | 1041.532348       | 521.2698 |
| 8  | 890.461809         | 445.734542        | 873.435260         | 437.221268 | 872.451244         | 436.729260        | N | <b>972.510885</b>  | 486.759081 | 955.484336        | 478.245806 | 954.500320        | 477.7537 |
| 9  | <b>1003.545873</b> | 502.276574        | <b>986.519324</b>  | 493.763300 | 985.535308         | 493.271292        | L | <b>858.467958</b>  | 429.737617 | 841.441409        | 421.224343 | 840.457393        | 420.7323 |
| 10 | <b>1132.588466</b> | 566.797871        | 1115.561917        | 558.284597 | 1114.577901        | 557.792588        | E | <b>745.383894</b>  | 373.195585 | 728.357345        | 364.682311 | 727.373329        | 364.1903 |
| 11 | <b>1233.636145</b> | <b>617.321710</b> | 1216.609596        | 608.808436 | 1215.625580        | 608.316428        | T | <b>616.341301</b>  | 308.674289 | 599.314752        | 300.161014 | 598.330736        | 299.6690 |
| 12 | <b>1290.657609</b> | 645.832442        | <b>1273.631060</b> | 637.319168 | 1272.647044        | 636.827160        | G | <b>515.293622</b>  | 258.150449 | 498.267073        | 249.637175 | 497.283057        | 249.1451 |
| 13 | <b>1389.726023</b> | 695.366649        | <b>1372.699474</b> | 686.853375 | <b>1371.715458</b> | 686.361367        | V | <b>458.272158</b>  | 229.639717 | 441.245609        | 221.126443 | 440.261593        | 220.6344 |
| 14 | 1486.778787        | 743.893032        | <b>1469.752238</b> | 735.379757 | 1468.768222        | <b>734.887749</b> | P | <b>359.203744</b>  | 180.105510 | <b>342.177195</b> | 171.592236 | <b>341.193179</b> | 171.1002 |
| 15 | <b>1573.810815</b> | 787.409046        | <b>1556.784266</b> | 778.895771 | <b>1555.800250</b> | 778.403763        | S | 262.150980         | 131.579128 | 245.124431        | 123.065854 | 244.140415        | 122.5738 |
| 16 |                    |                   |                    |            |                    |                   | R | 175.118952         | 88.063114  | 158.092403        | 79.549839  |                   |          |

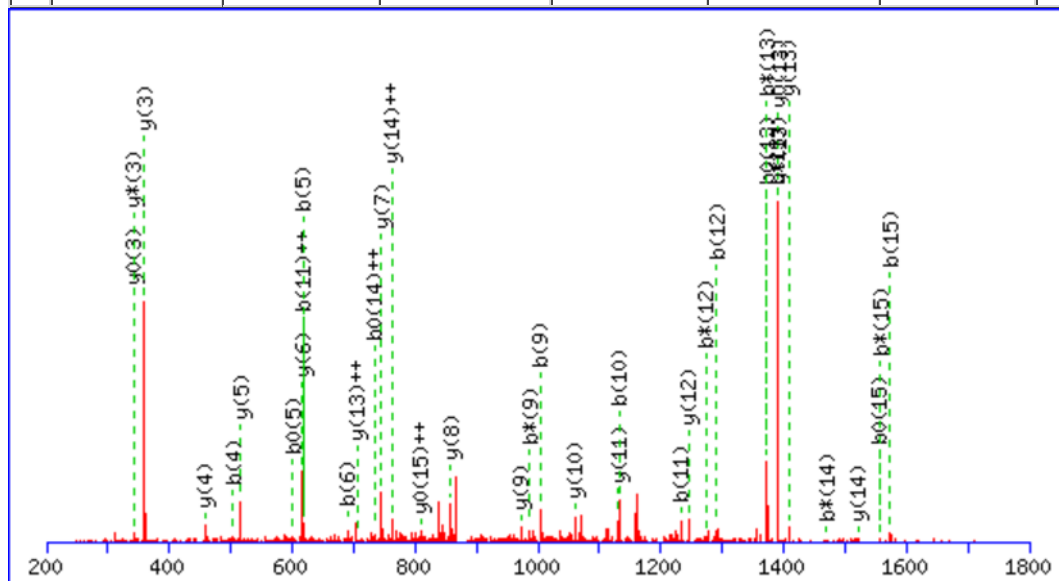

## Peptide View

MS/MS Fragmentation of **CAYGYQDETTGR**

Found in **IPI00027436**, Tax\_Id=9606 Gene\_Symbol=NGFR Tumor necrosis factor receptor superfamily member 16



**Experiment:** 60 - PyE-3 **Fraction:** PyE-3

Match to Query 11467: 1582.635848 from(792.325200,2+)

Title: OECHL100317\_21.8991.8991.2.dta

Data file \\Boromir\masse\Data LTQ-Orbitrap\Chrystelle Lacroix\Etude clinique sJPU\OECHL100317\_21.raw

**Monoisotopic mass of neutral peptide Mr(calc):** 1582.635818**Fixed modifications:** Carbamidomethyl (C) (apply to specified residues or termini only)**Ions****Score:** 52 **Expect:** 9.2e-005**Matches :** 19/114 fragment ions using 28 most intense peaks ([help](#))

| #  | <b>b</b>           | <b>b<sup>++</sup></b> | <b>b*</b>   | <b>b*<sup>++</sup></b> | <b>b<sup>0</sup></b> | <b>b<sup>0++</sup></b> | Seq.     | <b>y</b>           | <b>y<sup>++</sup></b> | <b>y*</b>         | <b>y*<sup>++</sup></b> | <b>y<sup>0</sup></b> | <b>y<sup>0++</sup></b> |
|----|--------------------|-----------------------|-------------|------------------------|----------------------|------------------------|----------|--------------------|-----------------------|-------------------|------------------------|----------------------|------------------------|
| 1  | 161.037925         | 81.022600             |             |                        |                      |                        | <b>C</b> |                    |                       |                   |                        |                      |                        |
| 2  | <b>232.075039</b>  | 116.541158            |             |                        |                      |                        | <b>A</b> | 1423.612453        | 712.309865            | 1406.585904       | 703.796590             | 1405.601888          | 703.3045               |
| 3  | <b>395.138368</b>  | 198.072822            |             |                        |                      |                        | <b>Y</b> | <b>1352.575339</b> | <b>676.791308</b>     | 1335.548790       | 668.278033             | 1334.564774          | 667.7860               |
| 4  | <b>452.159832</b>  | 226.583554            |             |                        |                      |                        | <b>G</b> | <b>1189.512010</b> | 595.259643            | 1172.485461       | 586.746369             | 1171.501445          | 586.2543               |
| 5  | <b>615.223161</b>  | 308.115219            |             |                        |                      |                        | <b>Y</b> | 1132.490546        | 566.748911            | 1115.463997       | 558.235637             | 1114.479981          | 557.7436               |
| 6  | 778.286490         | 389.646883            |             |                        |                      |                        | <b>Y</b> | <b>969.427217</b>  | 485.217247            | 952.400668        | 476.703972             | 951.416652           | 476.2119               |
| 7  | <b>906.345068</b>  | 453.676172            | 889.318519  | 445.162898             |                      |                        | <b>Q</b> | <b>806.363888</b>  | 403.685582            | 789.337339        | <b>395.172308</b>      | 788.353323           | 394.6803               |
| 8  | 1021.372011        | 511.189644            | 1004.345462 | 502.676369             | 1003.361446          | 502.184361             | <b>D</b> | <b>678.305310</b>  | 339.656293            | 661.278761        | 331.143019             | 660.294745           | 330.6510               |
| 9  | 1150.414604        | 575.710940            | 1133.388055 | 567.197666             | 1132.404039          | 566.705658             | <b>E</b> | <b>563.278367</b>  | 282.142822            | 546.251818        | 273.629547             | 545.267802           | 273.1375               |
| 10 | <b>1251.462283</b> | 626.234780            | 1234.435734 | 617.721505             | 1233.451718          | 617.229497             | <b>T</b> | <b>434.235774</b>  | 217.621525            | 417.209225        | 209.108250             | 416.225209           | 208.6162               |
| 11 | <b>1352.509962</b> | <b>676.758619</b>     | 1335.483413 | 668.245345             | 1334.499397          | 667.753337             | <b>T</b> | 333.188095         | 167.097685            | <b>316.161546</b> | 158.584411             | 315.177530           | 158.0924               |
| 12 | 1409.531426        | 705.269351            | 1392.504877 | 696.756077             | 1391.520861          | 696.264069             | <b>G</b> | <b>232.140416</b>  | 116.573846            | 215.113867        | 108.060571             |                      |                        |
| 13 |                    |                       |             |                        |                      |                        | <b>R</b> | 175.118952         | 88.063114             | 158.092403        | 79.549839              |                      |                        |

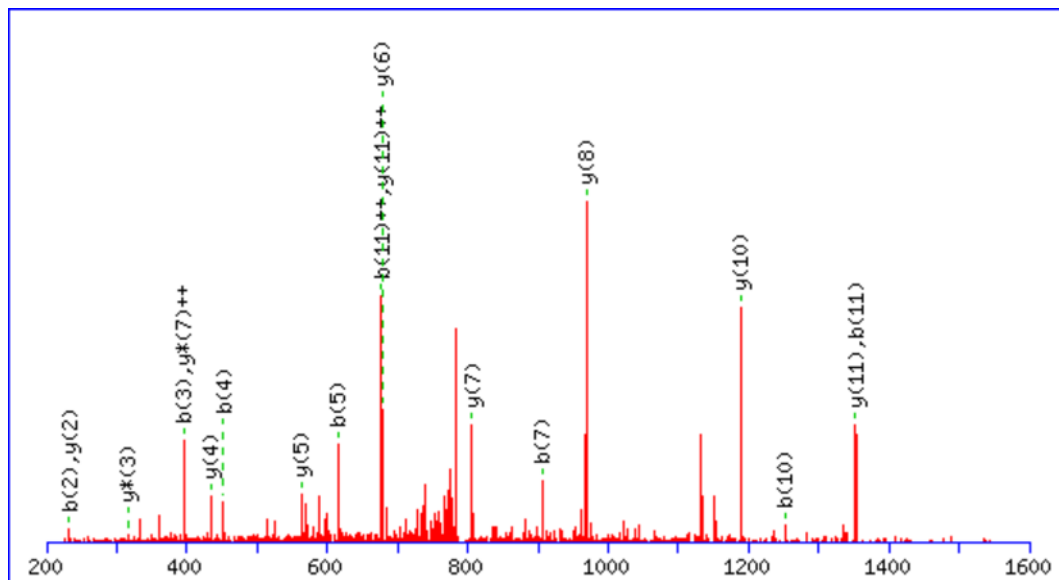

## Peptide View

MS/MS Fragmentation of **RGVSQAPTAAR**

Found in **IPI00025365**, Tax\_Id=9606 Gene\_Symbol=EDN3 Isoform Long of Endothelin-3

**Experiment:** 60 - PyE-3 **Fraction:** PyE-3

Match to Query 5573: 1112.605448 from(557.310000,2+)

Title: OECHL100317\_21.2384.2384.2.dta

Data file \\Boromir\masse\Data LTQ-Orbitrap\Chrystelle Lacroix\Etude clinique sJPU\OECHL100317\_21.raw

**Monoisotopic mass of neutral peptide Mr(calc):** 1112.605042 **Fixed modifications:** Carbamidomethyl (C) (apply to specified residues or termini only) **Ions**

**Score:** 51 **Expect:** 0.00059 **Matches :** 28/108 fragment ions using 46 most intense peaks ([help](#))

| # | b          | b <sup>++</sup> | b*         | b <sup>*++</sup> | b <sup>0</sup> | b <sup>0++</sup> | Seq. | y          | y <sup>++</sup> | y*         | y <sup>*++</sup> | y <sup>0</sup> | y <sup>0++</sup> | #  |
|---|------------|-----------------|------------|------------------|----------------|------------------|------|------------|-----------------|------------|------------------|----------------|------------------|----|
| 1 | 157.108387 | 79.057831       | 140.081838 | 70.544557        |                |                  | R    |            |                 |            |                  |                |                  | 11 |
| 2 | 214.129851 | 107.568564      | 197.103302 | 99.05289         |                |                  | G    | 957.511221 | 479.259249      | 940.484672 | 470.745974       | 939.500656     | 470.253966       | 10 |
| 3 | 313.198265 | 157.102770      | 296.171716 | 148.589496       |                |                  | V    | 900.489757 | 450.748517      | 883.463208 | 442.235242       | 882.479192     | 441.743234       | 9  |
| 4 | 400.230293 | 200.618785      | 383.203744 | 192.105510       | 382.219728     | 191.613502       | S    | 801.421343 | 401.214310      | 784.394794 | 392.701035       | 783.410778     | 392.209027       | 8  |
| 5 | 528.288871 | 264.648074      | 511.262322 | 256.134799       | 510.278306     | 255.642791       | Q    | 714.389315 | 357.698296      | 697.362766 | 349.185021       | 696.378750     | 348.693013       | 7  |

|    |                   |                   |                   |                   |                   |                   |          |                   |            |                   |                   |            |            |          |
|----|-------------------|-------------------|-------------------|-------------------|-------------------|-------------------|----------|-------------------|------------|-------------------|-------------------|------------|------------|----------|
| 6  | <b>599.325985</b> | <b>300.166631</b> | 582.299436        | 291.653356        | 581.315420        | 291.161348        | <b>A</b> | <b>586.330737</b> | 293.669007 | 569.304188        | <b>285.155732</b> | 568.320172 | 284.663724 | <b>6</b> |
| 7  | <b>696.378749</b> | 348.693013        | 679.352200        | 340.179738        | 678.368184        | 339.687730        | <b>P</b> | 515.293623        | 258.150450 | 498.267074        | 249.637175        | 497.283058 | 249.145167 | <b>5</b> |
| 8  | <b>797.426428</b> | <b>399.216852</b> | <b>780.399879</b> | <b>390.703578</b> | <b>779.415863</b> | 390.211570        | <b>T</b> | 418.240859        | 209.624068 | 401.214310        | 201.110793        | 400.230294 | 200.618785 | <b>4</b> |
| 9  | <b>868.463542</b> | 434.735409        | <b>851.436993</b> | <b>426.222135</b> | 850.452977        | <b>425.730127</b> | <b>A</b> | <b>317.193180</b> | 159.100228 | <b>300.166631</b> | 150.586953        |            |            | <b>3</b> |
| 10 | <b>939.500656</b> | 470.253966        | 922.474107        | 461.740692        | 921.490091        | 461.248684        | <b>A</b> | 246.156066        | 123.581671 | <b>229.129517</b> | 115.068397        |            |            | <b>2</b> |
| 11 |                   |                   |                   |                   |                   |                   | <b>R</b> | <b>175.118952</b> | 88.063114  | 158.092403        | 79.549840         |            |            | <b>1</b> |

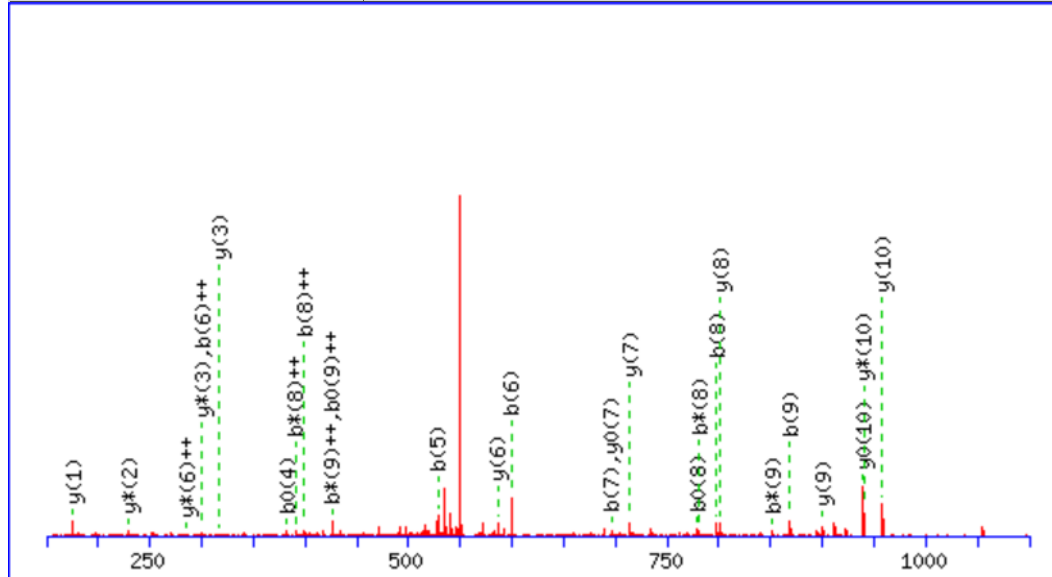
